# Supplementary material
Source: MDPI journal article supplement (https://www.mdpi.com/2073-4441/13/11/1475)
Supplement: s1 [file s1]

Archive with 17 entries (16 files):
- Supplementary files/
- Supplementary files/S1_1_08092016_File.xls
- Supplementary files/S1_1_15032017_File.xls
- Supplementary files/S1_1_24052017_File.xls
- Supplementary files/S1_2_08092016_File.xls
- Supplementary files/S1_2_15032017_File.xls
- Supplementary files/S1_2_24052017_File.xls
- Supplementary files/S2_1_02042018_File.xls
- Supplementary files/S2_1_24052018_File.xls
- Supplementary files/S2_1_25122018_File.xls
- Supplementary files/S2_2_02042018_File.xls
- Supplementary files/S2_2_24052018_File.pdf
- Supplementary files/S2_2_25122018_File.pdf
- Supplementary files/S3_03022018_File.pdf
- Supplementary files/S3_22092017_File.pdf
- Supplementary files/S3_22112017_File.pdf
- Supplementary files/Supplementary Materials_description.pdf
