# Supplementary material
Source: MDPI journal article supplement (https://www.mdpi.com/2073-4441/13/11/1475)
Supplement: s1 [file s1 › Supplementary files/S1_1_08092016_File.xls]

## Sheet: Лист1
		veb	veb	all	all	all	all	lyd	hc	lyd	lyd	hypl	veb	hypl	hypl	hypl	hypl	hgch	veb	all	hgch	hgch	lyd	lyd	lyd	hgch	all	hgch	lyd	hypl	hc	all	veb	hgch	veb	veb	hc	lyd	hypl	hgch	hgch	hgch	all	veb	hypl	all	hgch	lyd	hc
WL_cm-1	WL_nm	1	2	3	4	5	6	7	8	9	10	11	12	13	14	15	16	17	18	19	20	21	22	23	24	25	26	27	28	29	30	31	32	33	34	35	36	37	38	39	40	41	42	43	44	45	46	47	48
948.977	10537.7	1.36317	1.36675	1.23696	1.5012	1.59128	2.0612	1.95873	1.10762	2.56833	1.29769	1.16553	1.78741	1.34792	1.67908	1.59423	1.06847	1.76144	1.43124	1.41573	1.38905	1.92863	1.67167	1.41186	0.912192	1.28774	1.27151	1.5176	0.745673	1.64114	1.38902	1.48628	1.32481	1.17759	1.71739	1.30926	1.12368	1.59426	1.48358	1.64105	1.22612	1.39336	1.96357	1.41192	1.43147	1.59157	3.22746	1.16703	1.85478
950.906	10516.3	0.966019	0.980304	0.798234	0.96976	1.15721	1.69024	2.05167	1.14551	1.38094	0.788206	0.749398	1.2448	1.02319	1.09055	1.02912	0.702711	1.23375	1.02343	0.949572	1.1789	1.76103	1.10716	1.06288	1.04518	0.95406	0.842113	1.08626	1.28963	0.931895	0.938724	1.12658	1.02631	0.725107	1.60526	1.09966	0.742722	1.40589	1.22395	0.788355	0.879962	0.9512	1.44345	1.30428	1.04246	0.931375	2.52961	0.782321	1.28319
952.835	10495	1.16609	0.928491	0.947892	0.954556	1.14292	1.13946	1.78563	1.17084	1.1886	1.43636	0.855326	1.26278	1.07246	1.28393	1.11761	0.846023	1.24469	1.09805	1.07253	0.993254	1.20775	0.96272	1.13344	1.30345	0.979141	0.887806	1.19378	1.84444	1.01605	1.03862	1.25759	1.18888	0.993161	1.77472	1.07015	0.752058	1.30011	1.20707	0.75146	1.81538	1.02512	1.88849	1.50001	1.10477	1.31061	1.41687	0.859825	1.10978
954.764	10473.8	0.743662	0.425248	0.516845	0.663298	0.681141	1.00762	1.11611	0.395175	0.86428	1.53897	0.676699	0.958332	0.623698	0.982569	0.817672	0.488802	1.2203	0.726567	0.874803	0.626468	0.311762	0.643094	0.597971	0.687971	0.428469	0.626352	0.889753	1.47228	0.781915	0.650985	0.84248	0.8674	0.630946	1.17959	0.658033	0.452523	0.644515	0.786226	0.464716	1.26274	0.602283	1.31792	1.33297	0.622314	0.899993	0.366451	0.58134	0.763655
956.693	10452.7	0.786709	0.484781	0.592412	0.738337	0.753147	1.24801	0.823175	0.89308	0.745892	1.48361	0.827946	1.10075	0.743015	0.932665	0.953147	0.583903	1.31921	0.819811	1.04214	0.35795	0.581882	0.798644	0.556865	0.755783	0.882598	0.67522	0.844891	1.50182	0.73814	0.749026	0.875827	0.88799	0.779183	1.02658	0.787922	0.522432	0.412906	0.673955	0.357994	0.628279	0.838531	0.900589	1.58391	0.810869	0.801398	0.385001	0.65687	0.858817
958.622	10431.6	0.379219	0.310842	0.249804	0.400653	0.381737	0.6847	0.318025	0.892044	0.426816	0.893547	0.351866	0.478539	0.358776	0.609026	0.609593	0.263325	0.71326	0.565472	0.697489	0.312221	0.679087	0.655808	0.204606	0.594204	0.724172	0.37798	0.605883	0.738651	0.470936	0.446627	0.552165	0.547738	0.416855	0.460708	0.425421	0.24517	0.293128	0.361971	0.358038	0.317318	0.536685	0.67208	0.99032	0.48707	0.458312	0.352493	0.419273	0.649708
960.55	10410.7	0.371019	0.407874	0.382535	0.440198	0.362106	0.545754	0.494367	0.906543	0.414711	0.642866	0.323898	0.324502	0.463438	0.653374	0.631322	0.241464	0.874893	0.639725	0.803278	0.225376	0.765427	0.147204	0.405129	0.659606	0.843246	0.372282	0.665765	0.103938	0.640172	0.489808	0.5584	0.51999	0.445491	0.790122	0.41966	0.23473	0.104419	0.399248	0.280068	0.205555	0.572709	0.678915	0.982256	0.473811	0.410185	0.794735	0.361799	0.657211
962.479	10389.8	0.151475	0.168538	0.124646	0.190037	0.086155	0.190026	0.708589	0.302148	0.098184	0.434338	0.338019	0.175566	0.200586	0.288182	0.273824	0.04878	0.378523	0.224445	0.497318	0.266309	0.622707	0.342524	0.255122	0.548116	0.307297	0.23203	0.322479	0.54148	0.44797	0.261628	0.217098	0.250356	0.230657	0.652243	0.068143	0.27071	0.29578	0.228542	0.686029	0.324532	0.240626	0.576632	1.04622	0.133358	0.274353	1.1563	0.12443	0.347112
964.408	10369.1	0.214774	0.10922	0.046546	0.206368	0.182605	0.198432	0.595106	0.790833	0.247071	0.456749	0.379056	0.269277	0.314414	0.253298	0.278325	0.039736	0.481237	0.206522	0.336181	0.236152	0.669758	0.066259	0.326367	0.427259	0.585167	0.239882	0.27075	0.068551	0.485045	0.250854	0.297556	0.257377	0.158494	0.720797	0.225736	0.195487	0.262107	0.211666	0.272384	0.126268	0.148705	0.797319	0.763011	0.173929	0.266839	1.40392	0.067995	0.211767
966.337	10348.4	0.144604	0.206557	0.331625	0.222716	0.112303	0.099821	0.261479	0.605949	0.110705	0.115428	0.705781	0.309997	0.122687	0.062015	0.135274	0.247362	0.897094	0.099411	0.076502	0.150844	0.047551	0.257879	0.150715	0.266137	0.271512	0.221378	0.160288	0.256309	0.390719	0.204961	0.261559	0.096237	0.087093	0.437827	0.175869	0.41836	0.132201	0.177138	0.232439	0.296532	0.324257	0.727852	0.454471	0.120665	0.079846	1.06546	0.238553	0.237413
968.266	10327.7	0.112879	0.103675	0.305743	0.200418	0.084842	0.237831	0.230143	0.080584	0.338661	0.044795	0.617471	0.469932	0.152865	0.111632	0.147353	0.255844	0.836031	0.087661	0.041801	0.129522	0.362589	0.472332	0.122099	0.418124	0.482739	0.234865	0.143648	0.460731	0.3221	0.171644	0.282197	0.073282	0.112179	0.455654	0.120971	0.369297	0.112095	0.088419	0.350615	0.719804	0.285631	0.622543	0.53692	0.130114	0.158176	0.956852	0.175659	0.349652
970.194	10307.2	0.336635	0.30713	0.558616	0.436723	0.329973	0.555595	0.145994	0.289575	0.673921	0.288104	0.961178	0.734519	0.391855	0.246543	0.307933	0.563201	0.347823	0.367523	0.319923	0.27978	0.961003	0.441837	0.309839	0.709562	0.532588	0.502012	0.231142	0.558557	0.415223	0.352139	0.252799	0.273395	0.267008	0.60681	0.399501	0.421979	0.3463	0.227748	0.416644	0.490617	0.406642	0.453237	0.440193	0.406946	0.380476	1.14846	0.363577	0.502676
972.123	10286.8	0.303467	0.348352	0.497293	0.440289	0.343666	0.63628	0.438037	0.468036	0.71622	0.418276	0.852188	0.402984	0.38522	0.221353	0.273267	0.534936	0.614395	0.333218	0.349869	0.259649	0.774763	0.251141	0.268988	0.615339	0.250671	0.492937	0.217301	0.419169	0.474817	0.341995	0.23942	0.270445	0.324428	0.428918	0.296335	0.493942	0.548991	0.35533	0.496401	0.119129	0.475783	0.186252	0.487115	0.50028	0.416832	0.939023	0.415998	0.452305
974.052	10266.4	0.558521	0.681163	0.785584	0.637408	0.548662	0.676849	0.613253	0.643193	0.680534	0.61208	0.981676	0.661173	0.727375	0.519826	0.489062	0.786766	1.03915	0.538799	0.574525	0.45977	0.602056	0.722349	0.514861	0.474045	0.292685	0.635872	0.454913	0.516945	0.518728	0.598825	0.537781	0.474939	0.559083	0.475367	0.456996	0.838901	0.842367	0.717052	0.770228	0.37926	0.862224	0.155701	0.464127	0.806134	0.810347	0.740533	0.616145	0.647532
975.981	10246.1	0.542747	0.673757	0.804267	0.647561	0.517564	0.538258	0.558807	0.4658	0.431663	0.666565	1.04671	0.694897	0.688773	0.514788	0.50442	0.723742	1.12278	0.550202	0.557063	0.42446	0.562552	0.766566	0.524194	0.341475	0.889039	0.665322	0.424798	0.708166	0.493894	0.642489	0.51791	0.482901	0.586177	0.550711	0.556332	0.956045	0.874465	0.868149	0.790681	0.75011	0.729773	0.241685	0.658491	0.754059	0.95403	0.673568	0.694554	0.682307
977.91	10225.9	0.755909	0.900798	1.07205	0.925841	0.771226	0.774615	0.618121	0.642241	0.541889	1.05849	1.36133	0.938352	0.833755	0.799213	0.762685	0.974739	1.26605	0.821797	0.767132	0.821034	0.76663	1.00344	0.739071	0.633854	1.51877	0.898117	0.649094	0.723518	0.718172	0.872281	0.742915	0.767734	0.875655	0.926923	0.921253	1.19438	0.935904	1.05498	1.01617	1.11442	0.792817	0.896786	0.831028	0.969056	0.978709	0.672156	0.944244	0.986486
979.839	10205.8	0.768068	0.846138	1.07759	0.965124	0.866161	0.781308	0.744265	0.740653	0.665402	1.04797	1.24534	1.01807	0.877362	0.852841	0.76337	1.04666	1.0386	0.82328	0.837538	0.928582	0.69702	1.04995	0.748805	0.837749	1.40297	0.905056	0.703187	0.874892	0.675704	0.878325	0.731314	0.795089	0.87584	0.967951	0.88555	1.13525	0.763222	0.989307	1.01317	1.06185	0.8361	0.972702	0.897908	0.937063	0.879609	0.828196	1.00771	1.05523
981.767	10185.7	1.03522	1.03707	1.30151	1.18655	1.10739	0.851294	0.936457	1.0197	1.12149	1.17146	1.48814	1.19116	1.18744	1.0715	1.01272	1.2885	1.28408	1.06771	1.0668	1.20911	0.792116	1.26649	0.960312	1.1167	1.48313	1.08185	0.899477	1.12434	0.871412	1.08587	0.955207	1.00025	1.00687	1.11544	1.05063	1.24506	0.979633	1.19972	1.18041	1.08023	1.06858	0.996953	1.07723	1.1932	0.860671	1.21527	1.20427	1.24713
983.696	10165.7	1.07737	1.12174	1.30623	1.25719	1.16628	0.880004	0.690787	1.09731	1.1975	1.21129	1.51568	1.18753	1.13441	1.07291	1.02929	1.32495	1.33017	1.11218	1.0295	1.14142	0.789074	1.2441	0.97298	1.1779	1.6094	1.10417	0.897972	1.03461	1.00745	1.11439	0.998118	1.02114	1.04645	1.1082	1.10924	1.27233	1.13761	1.28631	1.27694	0.992768	1.08426	1.06243	1.15996	1.22041	0.995282	1.46923	1.26041	1.22307
985.625	10145.8	1.30658	1.42194	1.53835	1.49796	1.38918	1.30301	0.738842	1.48164	1.57941	1.68654	1.69416	1.64174	1.41386	1.31684	1.24993	1.5478	1.20572	1.35585	1.2783	1.1532	1.25076	1.36656	1.21521	1.40801	1.71354	1.30756	1.11521	1.20825	1.20381	1.36402	1.19843	1.28201	1.30504	1.28211	1.35839	1.44225	1.44924	1.53123	1.66717	1.45203	1.28605	1.21529	1.24679	1.47169	1.43612	1.70734	1.47756	1.4652
987.554	10126	1.32186	1.44819	1.57379	1.52881	1.40228	1.48829	0.863462	1.41821	1.53283	1.67868	1.69287	1.75049	1.54895	1.33397	1.29208	1.58015	1.09047	1.37993	1.31178	1.2267	1.21369	1.4398	1.26876	1.18012	1.7368	1.38258	1.142	1.40382	1.22138	1.44022	1.2684	1.36296	1.40997	1.297	1.43581	1.52202	1.61552	1.47459	1.62386	1.79279	1.36185	1.14795	1.09247	1.52806	1.39535	1.36393	1.5217	1.66489
989.483	10106.3	1.53899	1.61888	1.82361	1.73591	1.61798	1.6553	1.18703	1.66265	1.57164	1.74468	2.00756	1.87739	1.81987	1.57065	1.52541	1.80973	1.30023	1.57849	1.45224	1.62451	1.23223	1.76248	1.48586	1.26875	1.99748	1.59567	1.32955	1.5475	1.50425	1.65583	1.45673	1.54562	1.62345	1.72082	1.63164	1.81774	1.82488	1.55004	1.52688	1.84339	1.70231	1.34149	1.1877	1.73249	1.4817	1.47961	1.70686	1.90439
991.411	10086.6	1.58804	1.61895	1.8961	1.80224	1.69699	1.6345	1.28612	1.64249	1.6589	1.78973	2.05848	1.81741	1.90463	1.63534	1.58504	1.85735	1.29411	1.61419	1.43442	1.70381	1.31364	1.7549	1.53048	1.38307	2.09181	1.6542	1.38638	1.60293	1.51153	1.72129	1.48765	1.59191	1.66566	1.87902	1.68239	1.87312	1.81556	1.69075	1.4745	1.78587	1.69153	1.43567	1.42038	1.79964	1.56797	1.82614	1.80379	1.83655
993.34	10067	1.79144	1.84734	2.12856	2.00669	1.94788	2.01121	1.57389	1.82127	1.9565	2.03654	2.29956	2.02239	2.12929	1.883	1.80592	2.08076	1.57517	1.82601	1.69707	1.8676	1.81682	1.97649	1.74926	1.67314	2.17531	1.85295	1.58945	1.84874	1.64653	1.94632	1.67513	1.82274	1.85146	2.13204	1.89065	2.10834	2.01684	1.92657	1.9016	1.97518	1.85079	1.67074	1.74533	2.03197	1.87037	2.00144	1.99425	1.98169
995.269	10047.5	1.86607	1.93467	2.18591	2.07525	2.00166	2.09048	1.50027	2.00107	2.06525	2.24093	2.42858	2.06803	2.16517	1.96775	1.86631	2.16134	1.81062	1.87864	1.79494	1.891	1.86737	2.15319	1.80078	1.69976	2.46848	1.91643	1.66672	1.86834	1.74007	2.01021	1.74729	1.94358	1.91532	2.02291	1.8806	2.2044	1.99333	2.03001	2.17061	2.16333	2.07215	1.70491	1.89457	2.13729	1.87508	1.83278	2.05162	2.05344
997.198	10028.1	2.08135	2.18687	2.41165	2.30375	2.21348	2.30223	1.73628	2.13204	2.37217	2.48649	2.66558	2.3758	2.41642	2.2213	2.08615	2.37162	2.04306	2.09986	1.99381	2.06751	2.02276	2.23604	1.99735	1.89049	2.72756	2.11319	1.86651	2.14438	1.94997	2.20983	1.99315	2.17216	2.17845	2.19895	2.10215	2.36976	2.07585	2.20059	2.48696	2.40478	2.29196	1.86996	2.0391	2.35227	2.0217	2.07275	2.25441	2.21208
999.127	10008.7	2.13391	2.23931	2.4733	2.40092	2.28493	2.3669	1.94304	2.05683	2.43389	2.39737	2.74417	2.46534	2.54181	2.32038	2.13967	2.44774	2.13384	2.17988	2.02723	2.12425	2.22756	2.23232	2.04112	2.10571	2.53389	2.19785	1.92911	2.13326	1.95423	2.27066	2.04298	2.24847	2.23608	2.26257	2.2554	2.51272	2.04662	2.27012	2.43484	2.28995	2.32133	1.94502	2.04872	2.41166	2.00389	2.23839	2.3795	2.33192
1001.06	9989.46	2.3479	2.40586	2.69136	2.60366	2.49794	2.53638	1.96063	2.19998	2.62273	2.58534	3.04379	2.66821	2.77685	2.52416	2.32624	2.66396	2.54691	2.39649	2.25131	2.38138	2.51089	2.4912	2.25047	2.40567	2.57467	2.37666	2.13096	2.31732	2.20981	2.4742	2.27401	2.43621	2.40666	2.54559	2.44912	2.78144	2.26349	2.4979	2.54247	2.42661	2.53483	2.23507	2.25161	2.6152	2.36616	2.44101	2.59863	2.53636
1002.98	9970.25	2.42386	2.4739	2.76701	2.6737	2.56813	2.61567	1.95897	2.25048	2.66946	2.76727	3.21544	2.81342	2.83529	2.6122	2.4083	2.74091	2.55026	2.46326	2.3714	2.42664	2.17919	2.57062	2.33099	2.43631	2.96203	2.47561	2.20222	2.43357	2.36424	2.56158	2.39494	2.51106	2.44868	2.63405	2.46687	2.80268	2.49772	2.62602	2.64572	2.53496	2.68761	2.20135	2.40903	2.70777	2.62681	2.42209	2.66204	2.55768
1004.91	9951.11	2.63831	2.72411	2.95438	2.87806	2.75851	2.9434	2.11676	2.59018	2.83127	2.93488	3.38326	3.05872	3.06866	2.79165	2.63783	2.94561	2.66511	2.66019	2.58626	2.50932	2.16814	2.795	2.53438	2.60074	3.27596	2.67563	2.38608	2.67865	2.55875	2.76756	2.56499	2.71719	2.61113	2.83458	2.65635	2.9377	2.83571	2.90081	2.78632	2.81726	2.88665	2.3344	2.51644	2.90267	2.67721	2.68645	2.82692	2.6685
1006.84	9932.05	2.7389	2.85327	3.05558	2.97594	2.87651	2.94093	2.04476	2.70083	3.00295	2.86131	3.41233	3.17558	3.17296	2.88969	2.71897	2.98731	2.86119	2.72259	2.61301	2.49544	2.35264	2.82905	2.60712	2.63155	3.25277	2.74555	2.47638	2.91061	2.58786	2.85583	2.62065	2.7846	2.69485	2.83122	2.80427	2.97634	2.94623	2.94098	2.86821	2.79025	2.89795	2.42744	2.42385	2.97277	2.48944	2.79585	2.94532	2.79492
1008.77	9913.05	2.94256	3.06611	3.28603	3.16734	3.08724	3.02649	2.22136	2.76941	3.32258	3.1023	3.60896	3.43009	3.36972	3.10349	2.91409	3.1872	3.12753	2.90899	2.78236	2.704	2.51961	3.03862	2.80074	2.73987	3.26356	2.91535	2.67892	3.0239	2.82223	3.05705	2.80603	2.96208	2.90238	2.96284	3.02206	3.15652	3.14522	3.07677	3.00145	2.84092	3.07425	2.6093	2.46814	3.18898	2.77412	2.96185	3.15588	3.04789
1010.7	9894.14	3.02286	3.12623	3.36483	3.26347	3.17919	3.13374	2.37183	2.74325	3.34685	3.23311	3.63157	3.49398	3.46551	3.21512	3.00061	3.29326	3.18002	3.00747	2.89029	2.76059	2.45106	3.11971	2.87783	2.92028	3.42065	3.02014	2.75223	3.09143	2.92717	3.13962	2.90109	3.05251	3.01565	2.99786	3.09121	3.31955	3.19741	3.22428	3.08695	3.04348	3.15984	2.57525	2.58609	3.2735	3.03909	3.03401	3.22431	3.16948
1012.63	9875.29	3.22273	3.31739	3.57021	3.47533	3.40998	3.4628	2.52572	2.98905	3.54256	3.43406	3.76849	3.73233	3.67851	3.44991	3.19466	3.50705	3.37443	3.20254	3.08559	2.9123	2.6257	3.3429	3.06489	3.13789	3.6405	3.18944	2.93535	3.2106	3.03881	3.33519	3.06318	3.26989	3.20274	3.30672	3.30308	3.57081	3.28383	3.40935	3.451	3.40413	3.33681	2.78649	2.91894	3.49835	3.17163	3.30405	3.40584	3.298
1014.56	9856.52	3.3295	3.42166	3.66188	3.57512	3.50994	3.62871	2.70045	3.13553	3.6262	3.54567	3.86404	3.89499	3.76796	3.53726	3.2746	3.60666	3.40292	3.27072	3.16734	3.08811	2.93428	3.52999	3.15137	3.13508	3.64123	3.27772	3.03444	3.32978	3.11816	3.44508	3.13369	3.37397	3.31995	3.46197	3.42985	3.69262	3.33263	3.50661	3.5846	3.49857	3.38228	3.03783	3.19203	3.59975	3.27607	3.46886	3.52374	3.36749
1016.49	9837.81	3.53692	3.65573	3.87888	3.76426	3.70134	3.76109	3.05012	3.15782	3.71244	3.62457	4.10501	4.11509	4.00914	3.7548	3.47804	3.79431	3.48954	3.46231	3.3766	3.27125	3.08772	3.77177	3.36106	3.40062	3.78774	3.45449	3.20715	3.6051	3.36236	3.64719	3.32577	3.5593	3.56345	3.6216	3.59599	3.86188	3.54954	3.67901	3.74052	3.66175	3.61211	3.19452	3.3992	3.79455	3.39025	3.67413	3.70693	3.63305
1018.41	9819.18	3.64723	3.77696	3.9922	3.88553	3.81044	3.83171	3.06512	3.36249	3.84726	3.79266	4.18234	4.23159	4.10886	3.84021	3.58707	3.91658	3.57382	3.58833	3.49184	3.29107	3.09431	3.81974	3.46398	3.50534	3.96208	3.56393	3.30786	3.58711	3.44799	3.75099	3.41723	3.64615	3.64602	3.67771	3.66582	3.86468	3.69683	3.75171	3.91596	3.61001	3.75393	3.32006	3.52116	3.89138	3.48593	3.72544	3.80614	3.8091
1020.34	9800.62	3.86849	3.96581	4.20223	4.10713	4.04209	4.14683	3.20484	3.72925	4.12913	4.09409	4.42766	4.38022	4.28609	4.07374	3.80578	4.14513	3.83593	3.81832	3.71358	3.5425	3.41765	3.9064	3.66441	3.66475	4.15252	3.7485	3.50492	3.65039	3.61979	3.96421	3.63698	3.82813	3.80098	3.88768	3.87931	4.02744	3.90809	3.91475	4.09262	3.80617	3.95183	3.59182	3.66452	4.0915	3.67915	3.79605	4.00693	3.9413
1022.27	9782.13	3.98487	4.05859	4.32202	4.22916	4.19012	4.2617	3.31878	3.73927	4.24104	4.21251	4.58418	4.46639	4.40493	4.19282	3.91778	4.26901	3.96088	3.93179	3.81885	3.68658	3.5961	4.00808	3.7866	3.79097	4.29621	3.8665	3.61842	3.80258	3.77424	4.08805	3.78593	3.96488	3.89621	4.08857	4.05047	4.22918	4.04263	4.08088	4.17653	4.08103	4.02372	3.72557	3.76674	4.23081	3.81889	3.93207	4.15106	3.97034
1024.2	9763.71	4.19166	4.28041	4.55788	4.43307	4.4059	4.46319	3.41161	3.90841	4.4888	4.38427	4.83275	4.75471	4.64956	4.42295	4.10503	4.47766	4.17198	4.12695	4.03297	3.88216	3.74578	4.13589	3.99479	3.97208	4.51202	4.07012	3.82298	3.93272	4.00095	4.2823	3.98053	4.19406	4.09459	4.27945	4.25529	4.43869	4.2647	4.32989	4.35692	4.35896	4.28689	3.93503	3.92425	4.44708	4.01645	4.15658	4.37254	4.23745
1026.13	9745.35	4.3091	4.43605	4.70166	4.58274	4.52883	4.62832	3.44567	4.08259	4.60348	4.54264	5.01999	4.93471	4.80672	4.54983	4.22276	4.58476	4.30822	4.24319	4.15721	4.06142	3.86054	4.17015	4.11174	4.09314	4.59263	4.20181	3.95484	4.01559	4.08526	4.41047	4.10382	4.31521	4.22655	4.41942	4.33956	4.58125	4.40878	4.43495	4.372	4.5427	4.45894	3.97268	3.92549	4.59974	4.19317	4.14112	4.51178	4.4097
1028.06	9727.07	4.51	4.67247	4.9231	4.8079	4.74101	4.91341	3.60098	4.35573	4.7973	4.8094	5.30802	5.11331	5.07428	4.78637	4.44637	4.80105	4.54018	4.45517	4.35722	4.24268	4.14905	4.45513	4.31349	4.32095	4.74182	4.38102	4.14337	4.33046	4.28868	4.64037	4.30041	4.51518	4.4464	4.58081	4.54508	4.79589	4.60322	4.62216	4.55894	4.64353	4.62454	4.11073	3.99	4.81684	4.4357	4.38561	4.7241	4.58789
1029.99	9708.85	4.6345	4.79427	5.05037	4.94177	4.88136	4.99184	3.73588	4.41136	4.95325	5.01978	5.43967	5.26172	5.22419	4.95257	4.58469	4.96785	4.7023	4.58338	4.48341	4.32119	4.33308	4.69224	4.43732	4.43561	4.93683	4.51011	4.27921	4.58544	4.43632	4.78879	4.39521	4.6649	4.57969	4.693	4.6763	4.91813	4.68479	4.80212	4.73707	4.73676	4.78008	4.24207	4.18526	4.95438	4.58663	4.59305	4.87853	4.6917
1031.92	9690.71	4.84655	4.97893	5.27032	5.15798	5.10162	5.18802	3.97023	4.59213	5.19632	5.27604	5.63644	5.52656	5.41748	5.17499	4.79542	5.20155	4.94067	4.78315	4.70786	4.50014	4.44556	4.93972	4.65658	4.6568	5.15254	4.71586	4.46463	4.78404	4.58161	5.00594	4.59116	4.86973	4.78183	4.86324	4.84703	5.13561	4.88442	5.04647	4.95906	4.98422	5.06783	4.48369	4.51558	5.17298	4.67425	4.82204	5.06939	4.87928
1033.85	9672.63	4.98355	5.09754	5.41777	5.30303	5.24505	5.33371	4.10795	4.69555	5.33152	5.3553	5.81498	5.68668	5.55876	5.31581	4.93134	5.3559	5.06859	4.92066	4.8261	4.65884	4.54074	5.08115	4.79509	4.7512	5.22482	4.85772	4.58796	4.78035	4.68602	5.14108	4.74494	5.01243	4.9143	5.01367	5.01605	5.30726	5.06157	5.17373	5.09815	5.17087	5.17678	4.61588	4.74415	5.32163	4.70197	5.04174	5.20332	5.01785
1035.77	9654.61	5.19303	5.31911	5.62935	5.50108	5.44556	5.55321	4.36324	4.85048	5.58462	5.54664	6.02267	5.93156	5.80406	5.54155	5.13826	5.56448	5.27668	5.13249	5.03733	4.91861	4.74517	5.28413	4.99878	4.84199	5.34842	5.05102	4.779	5.01334	4.92405	5.34296	4.94684	5.21319	5.11567	5.27726	5.28268	5.53073	5.33628	5.34139	5.30806	5.3548	5.36504	4.84865	4.93325	5.53358	4.90811	5.32106	5.43274	5.24525
1037.7	9636.67	5.32855	5.47423	5.76944	5.64385	5.57921	5.65844	4.42315	4.93722	5.76863	5.78028	6.13976	6.06383	5.95377	5.69627	5.271	5.70143	5.4574	5.2644	5.18183	5.01102	4.81298	5.38211	5.12861	4.9743	5.58217	5.18588	4.92235	5.2144	5.08822	5.47935	5.09183	5.33687	5.2772	5.43775	5.44952	5.70122	5.521	5.47915	5.47444	5.45411	5.52071	5.03061	4.98712	5.66357	5.09834	5.45941	5.59765	5.41275
1039.63	9618.79	5.54283	5.68996	5.99599	5.8654	5.80107	5.82126	4.48615	5.14678	5.96892	6.0303	6.35097	6.22834	6.20378	5.92151	5.48801	5.9226	5.65856	5.4713	5.36906	5.13508	4.90869	5.58465	5.33951	5.20871	5.87257	5.37557	5.12436	5.32886	5.27691	5.6948	5.29605	5.54924	5.49775	5.64374	5.62188	5.88965	5.70913	5.68567	5.65709	5.65385	5.77209	5.27075	5.18199	5.85621	5.40691	5.6393	5.80499	5.62503
1041.56	9600.98	5.66988	5.80809	6.15027	6.01089	5.95865	6.05595	4.63979	5.38723	6.14015	6.14255	6.48801	6.37774	6.3649	6.06162	5.63198	6.05935	5.81117	5.62251	5.47585	5.26139	5.0359	5.7413	5.48302	5.36377	6.00886	5.51446	5.26219	5.46579	5.40369	5.84938	5.44027	5.7023	5.62183	5.78809	5.72467	6.02538	5.79579	5.8718	5.76847	5.83641	5.9103	5.40766	5.31696	5.99543	5.58864	5.7269	5.95872	5.77082
1043.49	9583.23	5.87069	6.00486	6.36691	6.21038	6.17678	6.3003	4.85987	5.57424	6.37483	6.44913	6.66656	6.62756	6.57554	6.27215	5.83615	6.26578	6.02186	5.83209	5.66307	5.45361	5.28064	5.88835	5.68719	5.61041	6.0728	5.7141	5.46249	5.68858	5.60261	6.06447	5.63627	5.91594	5.79883	5.97295	5.94574	6.23245	5.94755	6.10168	5.99698	6.07106	6.08143	5.58769	5.47844	6.21953	5.76676	5.81685	6.161	5.9684
1045.42	9565.55	6.021	6.1636	6.51119	6.37699	6.32253	6.46803	4.96317	5.66746	6.50219	6.61336	6.80502	6.78735	6.742	6.42845	5.97382	6.42923	6.11601	5.97649	5.81042	5.59735	5.3585	6.02071	5.8258	5.72746	6.25522	5.85903	5.58116	5.84785	5.72991	6.20842	5.78476	6.05539	5.91143	6.11316	6.10239	6.37038	6.08534	6.23563	6.16326	6.25226	6.22991	5.67227	5.63156	6.38437	5.81397	5.94576	6.30779	6.14829
1047.35	9547.93	6.22525	6.38984	6.73519	6.59482	6.53905	6.65599	5.1501	5.90427	6.77736	6.73273	7.03752	7.02773	6.98858	6.64974	6.17763	6.65702	6.25173	6.17853	6.00987	5.81743	5.55898	6.23196	6.03523	5.93804	6.56868	6.04452	5.77062	6.06631	5.91689	6.41507	5.98997	6.25912	6.1131	6.36529	6.29615	6.60654	6.29803	6.41828	6.36956	6.37503	6.44952	5.80225	5.80095	6.59015	5.93058	6.21214	6.49606	6.35901
1049.28	9530.38	6.36691	6.53488	6.88882	6.74277	6.70747	6.83036	5.32629	6.00572	6.93887	6.85842	7.18621	7.19067	7.13691	6.81133	6.31754	6.82213	6.32712	6.32207	6.15145	5.93389	5.73685	6.3639	6.18017	6.16329	6.74388	6.17878	5.91873	6.22323	6.0776	6.57307	6.13194	6.41866	6.26485	6.57587	6.44949	6.79706	6.48427	6.57143	6.59022	6.51957	6.62571	5.87819	5.89299	6.73062	6.16634	6.44939	6.66676	6.54594
1051.2	9512.89	6.57376	6.73065	7.09664	6.94879	6.91921	7.07636	5.52684	6.19268	7.07055	7.08573	7.42182	7.41383	7.35056	7.03311	6.52957	7.04349	6.50013	6.52454	6.3671	6.10814	5.94127	6.58498	6.38238	6.39784	6.91839	6.36167	6.10452	6.41372	6.27092	6.78079	6.31889	6.6166	6.47374	6.78797	6.66029	6.94193	6.73189	6.76776	6.81443	6.74011	6.85726	6.13101	6.10529	6.92914	6.46425	6.67604	6.87317	6.7371
1053.13	9495.47	6.71553	6.86545	7.25218	7.10699	7.05833	7.20385	5.6641	6.34476	7.19513	7.26459	7.58967	7.59459	7.5434	7.17674	6.68919	7.19391	6.64291	6.66835	6.53728	6.25604	6.06808	6.72573	6.5214	6.56097	7.09457	6.50583	6.23609	6.47242	6.40982	6.93172	6.44224	6.74987	6.62283	6.87812	6.7926	7.04612	6.91534	6.88314	6.92784	6.90946	6.97201	6.32406	6.31804	7.09909	6.60206	6.83068	7.0252	6.85432
1055.06	9478.11	6.92814	7.069	7.46457	7.31233	7.2584	7.42368	5.82276	6.56583	7.41295	7.56874	7.81813	7.82266	7.79873	7.39179	6.88696	7.39682	6.89377	6.87819	6.74663	6.45913	6.25374	6.95597	6.72032	6.78296	7.29375	6.69535	6.4277	6.68876	6.63145	7.13984	6.61846	6.94365	6.81525	7.0465	6.96743	7.25699	7.13401	7.06748	7.09572	7.13678	7.17796	6.55667	6.57308	7.30566	6.73126	7.07193	7.21854	7.02142
1056.99	9460.82	7.07233	7.22482	7.61047	7.45734	7.42357	7.60045	5.91547	6.69787	7.54148	7.73045	7.96336	7.9828	7.96163	7.55297	7.01725	7.54077	7.14865	7.02246	6.89888	6.59346	6.41849	7.11118	6.86711	6.843	7.44834	6.83615	6.56902	6.94878	6.78558	7.29169	6.75328	7.10663	6.95317	7.20158	7.11743	7.44062	7.2905	7.21934	7.204	7.28214	7.33576	6.72649	6.71065	7.45423	6.88281	7.23743	7.37671	7.20275
1058.92	9443.58	7.26112	7.4483	7.82478	7.65641	7.63241	7.76683	6.06641	6.79669	7.78605	7.79926	8.19711	8.21598	8.17519	7.77027	7.2211	7.75505	7.46341	7.21488	7.07639	6.78682	6.69062	7.3269	7.06768	7.0073	7.56638	7.01611	6.75625	7.09002	6.94168	7.49128	6.96042	7.31324	7.13955	7.42791	7.35458	7.64622	7.45985	7.40188	7.39943	7.52856	7.51853	6.9487	6.83956	7.64171	7.07308	7.39175	7.58678	7.43167
1060.85	9426.41	7.40109	7.59125	7.98762	7.82292	7.78983	7.89253	6.13626	6.94444	8.0042	7.96009	8.39405	8.36081	8.34872	7.91714	7.36383	7.9204	7.62415	7.36021	7.21318	6.90594	6.81959	7.50388	7.21485	7.14219	7.66659	7.16138	6.89511	7.14001	7.08187	7.64102	7.1305	7.4653	7.26609	7.58853	7.52998	7.81796	7.55285	7.57866	7.59905	7.64508	7.72833	7.12879	6.91879	7.78564	7.21626	7.46833	7.74263	7.54654
1062.78	9409.31	7.6001	7.77387	8.1998	8.02745	7.99945	8.13836	6.26796	7.14715	8.22008	8.2945	8.60807	8.58806	8.55611	8.15335	7.55913	8.13849	7.77729	7.56681	7.42233	7.10711	6.97703	7.70223	7.40884	7.30426	7.95045	7.3446	7.07854	7.35303	7.29087	7.8404	7.32008	7.66761	7.45722	7.81177	7.73761	8.00985	7.69129	7.7925	7.84397	7.80663	7.94553	7.26562	7.1344	8.00431	7.37838	7.65508	7.93283	7.7049
1064.71	9392.26	7.74927	7.90979	8.3506	8.17074	8.15916	8.29712	6.3977	7.24627	8.3417	8.50888	8.77098	8.76003	8.6966	8.31014	7.70623	8.30799	7.87052	7.71516	7.54806	7.29799	7.10888	7.84612	7.55172	7.44308	8.18989	7.48138	7.20309	7.5505	7.41637	7.98522	7.44971	7.82801	7.62194	7.96563	7.86216	8.14255	7.83313	7.94538	7.98488	7.91458	8.09217	7.3611	7.28088	8.16885	7.56094	7.8727	8.09458	7.86514
1066.64	9375.28	7.95108	8.11596	8.55067	8.3696	8.34961	8.48811	6.61792	7.44373	8.49373	8.61997	8.96925	8.95103	8.91207	8.51313	7.89969	8.50297	8.04952	7.9046	7.73332	7.50642	7.26601	8.01097	7.75231	7.64023	8.33307	7.65159	7.38152	7.6807	7.57942	8.1785	7.62924	8.02353	7.82911	8.14103	8.02439	8.34183	8.06072	8.12254	8.16952	8.09247	8.25454	7.52742	7.44864	8.36967	7.80926	8.13197	8.28546	8.05346
1068.56	9358.35	8.09573	8.27451	8.70045	8.52792	8.49664	8.65753	6.73128	7.55281	8.59379	8.69328	9.10816	9.09691	9.07797	8.65684	8.04371	8.64332	8.18999	8.05404	7.88098	7.65818	7.38197	8.12089	7.89876	7.79263	8.37677	7.79811	7.51866	7.74157	7.73202	8.32434	7.77223	8.16691	7.97906	8.28271	8.15289	8.52746	8.27277	8.29284	8.35759	8.26738	8.41767	7.65985	7.52151	8.49516	7.93513	8.22927	8.4324	8.20206
1070.49	9341.49	8.28087	8.46686	8.90169	8.70915	8.69768	8.88333	6.84721	7.7268	8.82781	8.88728	9.28008	9.29153	9.28787	8.84622	8.24048	8.83271	8.40921	8.25013	8.07778	7.81554	7.52375	8.25871	8.08636	7.98816	8.51025	7.97301	7.69574	7.99014	7.92112	8.51495	7.96571	8.35202	8.15041	8.52562	8.33969	8.741	8.47512	8.49021	8.5442	8.5002	8.63271	7.8443	7.71556	8.66577	8.05178	8.34938	8.61486	8.38845
1072.42	9324.69	8.41846	8.59709	9.05019	8.85317	8.84983	9.02857	7.02636	7.91553	9.0381	9.118	9.39902	9.45456	9.43709	9.00276	8.38097	8.97775	8.59821	8.3793	8.21671	7.89334	7.64111	8.40293	8.22742	8.12764	8.67204	8.10063	7.83637	8.09596	8.03626	8.65957	8.1068	8.49574	8.27589	8.69844	8.51078	8.86965	8.61086	8.62719	8.69191	8.65062	8.76947	7.96643	7.97613	8.81072	8.11755	8.56031	8.74925	8.52955
1074.35	9307.95	8.60693	8.78061	9.2406	9.05234	9.04163	9.17845	7.20159	8.13258	9.26777	9.31665	9.57053	9.69484	9.65622	9.20528	8.55324	9.17566	8.80502	8.55495	8.39168	8.06479	7.80727	8.62678	8.40442	8.25634	8.90904	8.26437	8.01845	8.22273	8.22538	8.84467	8.27308	8.67532	8.45956	8.87479	8.72229	9.02639	8.78003	8.81588	8.87188	8.81352	8.91387	8.19564	8.20548	9.00114	8.33764	8.76435	8.92897	8.70359
1076.28	9291.27	8.74859	8.92806	9.38573	9.19534	9.18953	9.31837	7.25947	8.21808	9.44977	9.43247	9.71194	9.8362	9.81219	9.35396	8.69288	9.31456	8.94488	8.69499	8.55755	8.19545	7.9244	8.78358	8.54104	8.34923	9.07015	8.39569	8.15644	8.40629	8.38848	8.99349	8.39737	8.81185	8.60784	8.97392	8.85453	9.17152	8.90624	8.95021	8.94566	8.93604	9.05617	8.36945	8.27768	9.14498	8.48859	8.80514	9.08158	8.85703
1078.21	9274.65	8.92798	9.11849	9.57737	9.37154	9.3805	9.55429	7.42286	8.37684	9.63059	9.61822	9.90674	10.001	9.99861	9.54254	8.87408	9.50597	9.09178	8.87026	8.74272	8.35864	8.12073	8.96183	8.71908	8.52543	9.16717	8.56558	8.32871	8.64805	8.5494	9.17596	8.56738	8.98804	8.78857	9.16783	8.99061	9.34284	9.07979	9.11108	9.1275	9.15906	9.26763	8.55709	8.39224	9.31417	8.70051	8.91268	9.2694	9.05392
1080.14	9258.09	9.06215	9.26411	9.72049	9.5221	9.52193	9.7229	7.5789	8.57258	9.71914	9.74773	10.0487	10.1713	10.1393	9.69796	9.00284	9.66059	9.19923	9.00199	8.84708	8.46101	8.26844	9.06485	8.85514	8.69056	9.25069	8.70162	8.44948	8.81536	8.65371	9.31148	8.708	9.11983	8.91437	9.30805	9.10741	9.48708	9.20772	9.2477	9.29022	9.30909	9.42742	8.68249	8.51069	9.44875	8.84131	9.03901	9.403	9.19258
1082.07	9241.58	9.24541	9.45084	9.9079	9.70552	9.70515	9.87986	7.69302	8.64984	9.86209	9.95378	10.2456	10.3809	10.3383	9.88703	9.18137	9.84584	9.36927	9.1787	8.99981	8.57887	8.41388	9.24598	9.03311	8.8948	9.45413	8.85356	8.60955	8.99216	8.82924	9.48486	8.88422	9.28534	9.0768	9.50126	9.29079	9.69537	9.37449	9.42221	9.44021	9.49828	9.56215	8.83318	8.66377	9.6271	9.04256	9.26268	9.56982	9.35339
1083.99	9225.14	9.38634	9.57673	10.0466	9.83703	9.85592	10.0013	7.77349	8.68456	9.97435	10.1531	10.3917	10.4887	10.4857	10.0385	9.31542	9.99298	9.48003	9.31542	9.12536	8.69425	8.55383	9.42351	9.16454	8.97714	9.63411	8.97646	8.74371	9.1241	8.96062	9.6248	9.01118	9.41955	9.19766	9.6537	9.45717	9.85662	9.53371	9.55658	9.59228	9.57052	9.69621	8.90683	8.77441	9.77184	9.18603	9.40596	9.71489	9.47762
1085.92	9208.75	9.56035	9.74195	10.2314	10.0044	10.0369	10.2045	7.98286	8.87924	10.1576	10.2847	10.5837	10.6444	10.6732	10.2314	9.47687	10.167	9.69396	9.49159	9.30683	8.8655	8.77739	9.59216	9.33296	9.19917	9.75263	9.14011	8.91101	9.22508	9.10553	9.80039	9.1513	9.58794	9.3549	9.83457	9.64343	10.0187	9.71867	9.71128	9.77675	9.76704	9.88514	9.01316	8.94191	9.94345	9.30899	9.60243	9.88432	9.64967
1087.85	9192.43	9.69693	9.89279	10.3715	10.1494	10.1683	10.3575	8.10548	9.04507	10.3554	10.3867	10.7377	10.7904	10.8179	10.3626	9.60274	10.3024	9.8733	9.61848	9.44049	9.03262	8.89684	9.70005	9.46371	9.36506	9.80737	9.26806	9.02757	9.30466	9.24246	9.93213	9.27604	9.71567	9.49137	9.91507	9.77015	10.1204	9.86561	9.84436	9.92861	9.93631	10.0309	9.15612	9.06992	10.0708	9.3834	9.75712	10.0181	9.80497
1089.78	9176.16	9.87023	10.0762	10.5462	10.3173	10.3411	10.5299	8.24493	9.19838	10.5848	10.6141	10.9139	10.9669	11.0126	10.5433	9.77606	10.4789	10.0501	9.77784	9.60564	9.24167	9.06207	9.80753	9.63257	9.47669	9.92665	9.4166	9.18119	9.50672	9.42106	10.1009	9.4518	9.87822	9.66818	10.0535	9.92542	10.2757	10.0365	10.0008	10.1272	10.0715	10.2128	9.31923	9.26838	10.2292	9.53601	9.92	10.1917	9.98539
1091.71	9159.94	10.0016	10.2035	10.6889	10.4471	10.4871	10.6431	8.38233	9.25846	10.7083	10.7242	11.0307	11.1243	11.1652	10.6837	9.90251	10.6148	10.1966	9.90198	9.7406	9.34643	9.21643	9.8701	9.76197	9.56601	10.1068	9.54113	9.30891	9.60509	9.52749	10.2389	9.57716	10.0124	9.80649	10.2191	10.0323	10.394	10.1544	10.1223	10.2533	10.2068	10.3495	9.46428	9.44674	10.3491	9.71172	10.0153	10.3351	10.0927
1093.64	9143.79	10.1752	10.3608	10.8757	10.6254	10.6615	10.842	8.50568	9.44531	10.8726	10.8619	11.1999	11.3088	11.3493	10.8593	10.0637	10.7962	10.3732	10.0722	9.9168	9.48445	9.3322	10.0698	9.92958	9.70258	10.2698	9.69824	9.46375	9.72669	9.67993	10.4083	9.73752	10.1782	9.97102	10.4371	10.1765	10.5464	10.2993	10.2791	10.3907	10.3953	10.5225	9.6099	9.61874	10.5237	9.92874	10.1202	10.504	10.21
1095.57	9127.69	10.3114	10.486	11.0119	10.7659	10.7971	11.0069	8.59936	9.59719	10.9772	11.037	11.352	11.4305	11.4945	11.0109	10.1989	10.9449	10.4839	10.2078	10.0463	9.59255	9.34723	10.261	10.0676	9.84783	10.3935	9.82548	9.59322	9.88769	9.81825	10.5459	9.88345	10.315	10.09	10.5742	10.3275	10.7008	10.419	10.4128	10.4956	10.5491	10.6505	9.74928	9.72322	10.6662	10.031	10.2194	10.6411	10.3432
1097.5	9111.65	10.4761	10.6652	11.1841	10.935	10.9659	11.1509	8.74703	9.7478	11.1083	11.2678	11.5133	11.6292	11.6853	11.2077	10.3775	11.1266	10.61	10.3801	10.2031	9.72905	9.44753	10.4894	10.2347	10.0528	10.5983	9.97821	9.74751	10.0692	9.97924	10.7217	10.0468	10.4881	10.2473	10.7154	10.5236	10.8911	10.5876	10.5813	10.6358	10.7062	10.8253	9.95205	9.85886	10.8357	10.1286	10.4144	10.8012	10.5314
1099.43	9095.66	10.6055	10.8043	11.3267	11.0759	11.105	11.2738	8.8678	9.89048	11.2601	11.4065	11.6601	11.8209	11.8424	11.3611	10.5112	11.2808	10.732	10.5234	10.3342	9.86229	9.58832	10.6272	10.3706	10.2161	10.7252	10.106	9.87052	10.1787	10.0963	10.8554	10.1749	10.6239	10.3778	10.8515	10.6734	11.0218	10.7501	10.7249	10.777	10.7852	10.9941	10.068	9.97383	10.964	10.2833	10.569	10.9366	10.7034
1101.35	9079.73	10.7672	10.9722	11.5109	11.2539	11.286	11.47	8.96922	10.1094	11.4941	11.5503	11.866	12.013	12.0534	11.5452	10.6833	11.4687	10.9281	10.6909	10.5211	10.0475	9.79056	10.7764	10.5479	10.3657	10.8681	10.2564	10.0289	10.3197	10.2661	11.0229	10.3417	10.7894	10.5366	11.0134	10.8257	11.1883	10.9527	10.9005	10.997	10.956	11.1788	10.1926	10.1273	11.1336	10.4785	10.7139	11.1113	10.8591
1103.28	9063.86	10.894	11.0942	11.6567	11.394	11.4341	11.6238	9.05496	10.2734	11.7116	11.6575	12.012	12.1296	12.2198	11.6942	10.8211	11.6223	11.089	10.8211	10.6537	10.1839	9.93739	10.8865	10.6897	10.4635	11.0375	10.3802	10.1591	10.4609	10.4166	11.164	10.478	10.93	10.6755	11.1716	10.9321	11.3718	11.1141	11.0336	11.2063	11.1413	11.3024	10.3313	10.2569	11.2739	10.6198	10.8481	11.27	10.9611
1105.21	9048.04	11.0538	11.2421	11.8332	11.5612	11.6059	11.7915	9.2175	10.3353	11.9151	11.882	12.18	12.2977	12.3963	11.8734	10.9901	11.805	11.2967	10.9933	10.8176	10.3548	10.1418	10.9878	10.8602	10.5532	11.2316	10.5307	10.3173	10.647	10.5633	11.3405	10.6496	11.0997	10.8492	11.3499	11.1018	11.5417	11.2933	11.2012	11.3839	11.3244	11.4654	10.5362	10.4128	11.4466	10.7865	11.0242	11.444	11.118
1107.14	9032.28	11.1755	11.3727	11.9743	11.7058	11.7392	11.9471	9.34513	10.4498	12.0179	12.0884	12.3266	12.4689	12.5423	12.0258	11.1269	11.9465	11.4438	11.1339	10.9524	10.4847	10.2858	11.0795	10.9973	10.6427	11.327	10.6587	10.4497	10.7959	10.6854	11.4794	10.7858	11.23	10.9784	11.5209	11.2519	11.6719	11.4204	11.3491	11.4843	11.4611	11.6287	10.6626	10.558	11.5921	10.946	11.1429	11.5904	11.2831
1109.07	9016.57	11.3274	11.5469	12.1476	11.8724	11.9062	12.1506	9.506	10.6734	12.1759	12.2349	12.4892	12.6619	12.7481	12.2187	11.294	12.131	11.5742	11.3024	11.1223	10.6574	10.4298	11.2835	11.1715	10.8441	11.4676	10.8144	10.6028	10.9777	10.8667	11.6448	10.9428	11.3936	11.1287	11.6549	11.4468	11.8596	11.5607	11.5082	11.6446	11.6377	11.8221	10.821	10.7074	11.7618	11.167	11.3126	11.7612	11.4942
1111	9000.92	11.4478	11.677	12.2847	12.0031	12.0486	12.2764	9.64313	10.7495	12.3163	12.3469	12.6197	12.8014	12.9018	12.3675	11.4267	12.2882	11.6644	11.4384	11.2628	10.7964	10.5289	11.5018	11.3125	10.9807	11.6141	10.9423	10.7287	11.0722	11.0065	11.7896	11.0743	11.533	11.2593	11.7723	11.6016	11.9938	11.6768	11.6449	11.7749	11.7654	11.9365	10.954	10.8445	11.9095	11.2647	11.488	11.9109	11.6313
1112.93	8985.32	11.5973	11.8229	12.4572	12.1644	12.2298	12.4184	9.78343	10.883	12.4769	12.5217	12.8107	12.9837	13.0851	12.5489	11.5984	12.4747	11.8117	11.6059	11.4312	10.9318	10.706	11.6975	11.4866	11.1641	11.7355	11.0885	10.8845	11.2032	11.1587	11.958	11.2331	11.695	11.4252	11.916	11.751	12.122	11.8314	11.8121	11.9339	11.8919	12.0921	11.0894	11.0547	12.0775	11.3771	11.6672	12.0765	11.7668
1114.86	8969.77	11.7203	11.9339	12.5943	12.3025	12.3664	12.5839	9.89023	11.006	12.6352	12.701	12.9592	13.1292	13.2557	12.7058	11.7398	12.6327	11.9608	11.7499	11.5718	11.0292	10.84	11.8279	11.6271	11.3169	11.8317	11.2079	11.0125	11.3197	11.294	12.0896	11.3658	11.8278	11.5608	12.0861	11.8658	12.2603	11.9656	11.9403	12.0946	12.0282	12.2437	11.204	11.1766	12.2056	11.4818	11.8137	12.2094	11.8785
1116.78	8954.28	11.8748	12.084	12.7544	12.4625	12.529	12.7402	10.0482	11.1257	12.8397	12.9216	13.1201	13.2995	13.4541	12.8863	11.8993	12.8006	12.1912	11.9162	11.7413	11.1644	10.9814	11.9451	11.7929	11.4618	12.0097	11.346	11.1639	11.4726	11.4538	12.2477	11.5265	11.9867	11.7148	12.2547	12.0126	12.4464	12.1284	12.0758	12.2516	12.2095	12.4518	11.3865	11.2869	12.3698	11.6621	11.943	12.3689	12.0534
1118.71	8938.84	11.9876	12.209	12.8885	12.5912	12.6671	12.8741	10.1627	11.2521	12.9768	13.0622	13.2639	13.4588	13.5934	13.0308	12.0277	12.9398	12.4148	12.0517	11.8689	11.27	11.0944	12.0396	11.9277	11.5657	12.1648	11.46	11.2827	11.6062	11.5585	12.3791	11.6456	12.1149	11.8375	12.3879	12.1514	12.5678	12.288	12.2002	12.3931	12.3305	12.581	11.5406	11.4103	12.5067	11.8305	12.0447	12.504	12.2045
1120.64	8923.46	12.1305	12.366	13.0491	12.742	12.8223	13.0327	10.2922	11.4084	13.1123	13.1959	13.438	13.641	13.7717	13.1887	12.1796	13.1113	12.6052	12.2118	12.0353	11.427	11.2555	12.2221	12.0881	11.7031	12.3198	11.5933	11.423	11.7356	11.6933	12.5349	11.7841	12.2615	11.978	12.518	12.3198	12.7131	12.4633	12.3423	12.5702	12.5065	12.7287	11.6755	11.5617	12.6627	12.0142	12.1596	12.6612	12.3605
1122.57	8908.12	12.2462	12.4807	13.1659	12.8647	12.9429	13.1791	10.4046	11.5625	13.2403	13.3468	13.5655	13.7644	13.9176	13.3275	12.3065	13.2463	12.7337	12.3311	12.1699	11.572	11.3678	12.3667	12.215	11.8472	12.3642	11.7062	11.5396	11.8267	11.8183	12.6608	11.8994	12.382	12.0845	12.6364	12.4388	12.8461	12.5878	12.4566	12.6796	12.6406	12.8746	11.7922	11.6827	12.7833	12.13	12.2783	12.7983	12.487
1124.5	8892.84	12.3858	12.6068	13.3112	13.0107	13.0892	13.3189	10.5228	11.6804	13.3998	13.5143	13.7182	13.9304	14.0786	13.4935	12.4579	13.4074	12.8737	12.473	12.3213	11.6996	11.512	12.5091	12.3643	12.0039	12.4588	11.8327	11.6881	11.9702	11.9519	12.8138	12.0423	12.5282	12.2274	12.7598	12.5746	12.996	12.7322	12.5996	12.829	12.7853	13.0168	11.9073	11.8526	12.9346	12.2702	12.456	12.9401	12.6183
1126.43	8877.62	12.4939	12.7085	13.4323	13.1263	13.2175	13.4346	10.6053	11.7739	13.5159	13.6268	13.8386	14.0774	14.2055	13.6198	12.57	13.535	12.9431	12.5885	12.4276	11.8016	11.6154	12.6521	12.4806	12.0947	12.6277	11.9377	11.7959	12.15	12.0563	12.9363	12.1636	12.6496	12.3396	12.9048	12.673	13.0993	12.8446	12.7232	12.9807	12.8932	13.138	12.0363	11.9571	13.0521	12.3802	12.5586	13.0661	12.7293
1128.36	8862.44	12.6276	12.8514	13.584	13.2682	13.37	13.6106	10.7179	11.9112	13.6794	13.7626	13.9761	14.2275	14.3779	13.7746	12.7109	13.6895	13.0573	12.7311	12.5631	11.9569	11.7254	12.7933	12.6245	12.2423	12.7609	12.0682	11.9141	12.294	12.2034	13.0764	12.3038	12.795	12.4805	13.067	12.7853	13.2332	12.9767	12.8578	13.1392	13.0133	13.2859	12.1766	12.0747	13.1859	12.5294	12.6846	13.2125	12.8626
1130.29	8847.32	12.7305	12.9721	13.7011	13.3873	13.4858	13.7625	10.8183	12.003	13.7956	13.8875	14.085	14.3355	14.5141	13.8951	12.8249	13.8168	13.2014	12.838	12.6805	12.0763	11.847	12.8805	12.7436	12.3775	12.8555	12.1675	12.0222	12.3654	12.3179	13.1932	12.4108	12.9091	12.5897	13.1909	12.9063	13.3524	13.0769	12.9602	13.2442	13.1344	13.4141	12.259	12.1932	13.2971	12.6585	12.8499	13.3287	12.9893
1132.21	8832.24	12.8571	13.1078	13.84	13.5194	13.6233	13.8634	10.9423	12.1512	13.9303	14.0268	14.2332	14.4794	14.6725	14.0432	12.9564	13.9628	13.3708	12.9697	12.8053	12.2464	11.9987	12.9914	12.8817	12.4919	12.9894	12.285	12.1536	12.5153	12.4312	13.3288	12.5373	13.0439	12.7151	13.2874	13.0509	13.4848	13.2023	13.0952	13.3499	13.2919	13.5645	12.3877	12.3285	13.4241	12.7571	13.0296	13.4587	13.1319
1134.14	8817.22	12.9612	13.2028	13.9475	13.6273	13.7381	13.9559	10.9988	12.233	14.0416	14.1526	14.3474	14.5782	14.7981	14.1664	13.0611	14.0855	13.5018	13.0782	12.9018	12.3511	12.0868	13.0992	12.9886	12.5958	13.1073	12.3831	12.2505	12.6408	12.5256	13.4348	12.639	13.1505	12.8235	13.3853	13.1668	13.5668	13.3175	13.2074	13.4288	13.3962	13.6506	12.5024	12.437	13.5287	12.8674	13.1649	13.5694	13.2375
1136.07	8802.25	13.087	13.3165	14.0752	13.7576	13.8716	14.111	11.0946	12.3739	14.1666	14.2521	14.4659	14.7014	14.9375	14.3025	13.1878	14.2241	13.6482	13.208	13.0196	12.4283	12.2073	13.2559	13.1205	12.7307	13.1982	12.4949	12.3663	12.7363	12.654	13.5624	12.7611	13.2676	12.9472	13.5166	13.2929	13.685	13.4615	13.3271	13.5791	13.5225	13.7725	12.616	12.5279	13.6585	13.0121	13.2995	13.6942	13.3475
1138	8787.34	13.1828	13.411	14.178	13.8546	13.9744	14.2351	11.1979	12.4852	14.259	14.3253	14.5753	14.8285	15.0427	14.4082	13.2861	14.3334	13.7416	13.3027	13.1278	12.5	12.3645	13.3742	13.2245	12.807	13.2702	12.589	12.4541	12.788	12.7466	13.6618	12.8528	13.3649	13.0358	13.6159	13.3768	13.8172	13.572	13.4261	13.7321	13.5902	13.8859	12.7108	12.5705	13.7637	13.1098	13.3859	13.7898	13.4401
1139.93	8772.47	13.2975	13.5407	14.3085	13.9665	14.1008	14.3524	11.2937	12.5603	14.3831	14.5276	14.7025	14.964	15.1785	14.5411	13.4079	14.4608	13.8285	13.4161	13.2611	12.59	12.4932	13.495	13.3466	12.9189	13.4111	12.6947	12.563	12.8825	12.8586	13.782	12.9678	13.4787	13.1446	13.7288	13.4985	13.9487	13.6819	13.5444	13.8794	13.7376	13.9965	12.8363	12.6824	13.8849	13.216	13.4789	13.9097	13.5721
1141.86	8757.65	13.3814	13.6398	14.4121	14.0634	14.2033	14.4341	11.3674	12.6598	14.4876	14.6465	14.7831	15.0497	15.2745	14.6447	13.4991	14.5633	13.9164	13.5092	13.3362	12.6793	12.5439	13.5767	13.4453	13.0054	13.4658	12.7723	12.655	12.9783	12.9608	13.8776	13.057	13.5656	13.2442	13.8292	13.5938	14.0398	13.7626	13.6321	13.9812	13.8616	14.0968	12.936	12.7984	13.9754	13.3199	13.5434	14.016	13.6788
1143.79	8742.88	13.4959	13.7513	14.5335	14.1833	14.3216	14.5609	11.4767	12.749	14.6342	14.7346	14.8908	15.1794	15.3909	14.7612	13.6127	14.696	14.0438	13.6213	13.452	12.8242	12.6313	13.6789	13.5666	13.1066	13.5568	12.866	12.7637	13.0938	13.0648	13.9968	13.1657	13.6776	13.359	13.9323	13.708	14.1537	13.8704	13.7299	14.0516	13.9795	14.2111	13.0346	12.9374	14.0841	13.4309	13.6453	14.1291	13.7874
1145.72	8728.16	13.5873	13.8326	14.6221	14.2713	14.4141	14.6602	11.5534	12.8056	14.7454	14.7928	14.9969	15.2825	15.5071	14.8574	13.7031	14.8031	14.1441	13.7086	13.561	12.9249	12.7283	13.7717	13.6597	13.1848	13.6741	12.9467	12.8437	13.1682	13.1386	14.0896	13.2432	13.7694	13.4458	14.0227	13.8136	14.2513	13.9431	13.8023	14.0953	14.0454	14.3144	13.1272	13.0466	14.1714	13.5053	13.7423	14.2144	13.8684
1147.65	8713.49	13.6962	13.946	14.7357	14.3806	14.5271	14.7594	11.6599	12.9267	14.834	14.9223	15.1095	15.4005	15.6442	14.9772	13.81	14.9252	14.2794	13.8188	13.6668	13.0363	12.8193	13.9071	13.7715	13.2911	13.7952	13.0421	12.9485	13.2936	13.2544	14.1976	13.3444	13.8792	13.5541	14.1391	13.9204	14.3389	14.0646	13.8977	14.2039	14.134	14.4548	13.2313	13.146	14.277	13.6312	13.8825	14.3216	13.9569
1149.57	8698.87	13.7813	14.0392	14.8232	14.4757	14.6177	14.8452	11.7364	13.0247	14.9052	15.0385	15.192	15.4917	15.7374	15.0706	13.8901	15.025	14.3828	13.8998	13.7386	13.1011	12.8868	13.981	13.8582	13.3828	13.8795	13.1142	13.0252	13.3699	13.3474	14.2825	13.4355	13.9623	13.6236	14.2374	13.9925	14.4267	14.1876	14.0004	14.2959	14.2191	14.529	13.3305	13.2007	14.3597	13.7288	13.9573	14.4149	14.0532
1151.5	8684.3	13.883	14.1498	14.9323	14.5797	14.7312	14.9459	11.8157	13.0682	15.0373	15.1565	15.3127	15.6009	15.8566	15.1906	13.996	15.1406	14.5089	14.0017	13.8419	13.1783	13.0194	14.0568	13.9657	13.4962	13.9768	13.2045	13.1171	13.4594	13.4391	14.3883	13.5412	14.0609	13.719	14.3425	14.0872	14.5477	14.2983	14.1058	14.4252	14.2945	14.6312	13.4181	13.319	14.4609	13.8142	14.0595	14.5212	14.165
1153.43	8669.78	13.9609	14.2314	15.011	14.6514	14.813	15.042	11.8856	13.1252	15.1163	15.201	15.3894	15.6765	15.9501	15.2813	14.0766	15.2266	14.6207	14.0823	13.9352	13.2423	13.1138	14.1418	14.0458	13.5409	14.0367	13.2757	13.1897	13.5231	13.4997	14.4719	13.6156	14.1351	13.7985	14.4325	14.1601	14.6273	14.3784	14.1659	14.5269	14.374	14.7235	13.499	13.416	14.5355	13.8615	14.1695	14.6037	14.2496
1155.36	8655.31	14.0623	14.3239	15.111	14.7521	14.9153	15.1617	11.9733	13.276	15.2187	15.2934	15.4788	15.7755	16.0658	15.3868	14.1773	15.3298	14.7126	14.1789	14.0304	13.3154	13.1676	14.2631	14.1489	13.6044	14.1129	13.3565	13.2805	13.6073	13.5891	14.5734	13.7084	14.2268	13.8948	14.5321	14.2666	14.7025	14.4716	14.264	14.6095	14.5226	14.8371	13.6189	13.4959	14.6365	13.9493	14.2905	14.7034	14.3472
1157.29	8640.88	14.1344	14.3925	15.1927	14.8331	14.9945	15.2354	11.9995	13.3069	15.3248	15.401	15.5574	15.8742	16.1624	15.4719	14.2541	15.4105	14.768	14.2476	14.0914	13.3768	13.2216	14.352	14.2276	13.6731	14.1633	13.4226	13.3493	13.6993	13.6645	14.6461	13.7761	14.2952	13.9678	14.5999	14.3456	14.7701	14.5322	14.3414	14.6851	14.6109	14.9216	13.6784	13.5356	14.7099	14.0231	14.3467	14.7765	14.4019
1159.22	8626.5	14.2302	14.4934	15.2957	14.9228	15.0942	15.3326	12.0758	13.3987	15.4274	15.533	15.6521	15.9797	16.2814	15.5796	14.3534	15.5176	14.8675	14.3399	14.1947	13.4678	13.3398	14.4351	14.3236	13.7816	14.2685	13.5106	13.4419	13.7987	13.7411	14.7394	13.8688	14.3894	14.0545	14.6887	14.4322	14.868	14.5975	14.426	14.798	14.6848	15.0148	13.7451	13.601	14.7951	14.1126	14.4035	14.8695	14.4698
1161.15	8612.17	14.3014	14.5746	15.3728	14.9911	15.1754	15.3867	12.1611	13.5024	15.4752	15.615	15.7162	16.0397	16.3719	15.6588	14.428	15.603	14.9432	14.412	14.2758	13.5296	13.4208	14.4863	14.4013	13.8663	14.3513	13.5748	13.5092	13.8849	13.8082	14.8128	13.9356	14.4658	14.1192	14.7758	14.5028	14.9291	14.6508	14.5005	14.887	14.7293	15.0896	13.8142	13.6845	14.871	14.1722	14.4781	14.9399	14.5448
1163.08	8597.89	14.3921	14.6706	15.4694	15.0841	15.274	15.4988	12.214	13.5655	15.5541	15.6847	15.8292	16.1343	16.4702	15.7588	14.5204	15.7079	15.03	14.5071	14.3683	13.625	13.4991	14.5919	14.5022	13.9458	14.4071	13.6469	13.5913	13.9424	13.9086	14.9049	14.0182	14.5498	14.2063	14.8802	14.5862	15.0143	14.7499	14.5779	14.9807	14.8149	15.1754	13.9086	13.7854	14.9631	14.2798	14.5919	15.0286	14.6559
1165	8583.66	14.4628	14.7352	15.5409	15.1537	15.3442	15.5971	12.2675	13.6058	15.6345	15.7381	15.9108	16.221	16.5407	15.8384	14.5892	15.793	15.1041	14.5777	14.4304	13.7142	13.5678	14.6694	14.5775	14.0215	14.4344	13.7023	13.6556	13.9661	13.9682	14.9764	14.0861	14.6141	14.2686	14.9478	14.6573	15.0976	14.8409	14.6395	15.018	14.8932	15.2592	13.9597	13.8709	15.0336	14.3769	14.6506	15.0971	14.7393
1166.93	8569.47	14.549	14.8149	15.6334	15.2405	15.4354	15.6968	12.3707	13.6855	15.7416	15.8598	15.9857	16.3216	16.646	15.9377	14.6774	15.889	15.1893	14.6667	14.5158	13.8098	13.6979	14.732	14.6697	14.0929	14.5406	13.7777	13.7335	14.0419	14.0518	15.0651	14.1641	14.6994	14.3591	15.0124	14.7471	15.1843	14.9441	14.7165	15.1099	14.9905	15.3487	14.0422	13.9544	15.115	14.4725	14.7134	15.1858	14.8071
1168.86	8555.33	14.6139	14.8773	15.7017	15.3057	15.5074	15.7526	12.4275	13.774	15.8177	15.9335	16.0471	16.3894	16.7235	16.0157	14.7421	15.9639	15.245	14.7337	14.5923	13.8713	13.7627	14.7943	14.7405	14.1482	14.606	13.8388	13.7937	14.1156	14.1199	15.1313	14.2228	14.7676	14.4219	15.0586	14.8078	15.2303	15.0279	14.7771	15.1907	15.0686	15.3903	14.1297	13.9937	15.174	14.506	14.7835	15.2509	14.8524
1170.79	8541.23	14.6983	14.9697	15.7864	15.388	15.5932	15.8521	12.4707	13.8527	15.9096	15.9766	16.1346	16.4765	16.8226	16.109	14.8269	16.0569	15.3387	14.8146	14.6777	13.9488	13.8191	14.872	14.8283	14.2366	14.6628	13.9127	13.873	14.1944	14.188	15.2129	14.3054	14.8486	14.498	15.1433	14.8922	15.3055	15.122	14.8755	15.2664	15.1455	15.4626	14.2107	14.0646	15.2595	14.5502	14.8908	15.3338	14.9235
1172.72	8527.18	14.7585	15.0348	15.847	15.4452	15.6578	15.9218	12.517	13.8727	15.9807	16.0486	16.1939	16.5419	16.896	16.1749	14.8902	16.1267	15.4215	14.8789	14.7322	14.0001	13.8992	14.9323	14.8943	14.3197	14.7078	13.9655	13.9298	14.2317	14.2382	15.2736	14.3618	14.9017	14.5594	15.2201	14.9496	15.3744	15.1734	14.9534	15.3497	15.2278	15.546	14.2519	14.1479	15.3219	14.6326	14.9682	15.3945	15.0086
1174.65	8513.18	14.8345	15.1066	15.9288	15.5171	15.7385	15.9937	12.5932	13.9409	16.0569	16.1544	16.2647	16.6303	16.9971	16.2632	14.9664	16.2104	15.4852	14.9587	14.8109	14.0705	13.9796	15.023	14.9736	14.3827	14.7591	14.0305	13.9954	14.2896	14.316	15.3512	14.4359	14.975	14.6293	15.3162	15.0168	15.4614	15.232	15.0229	15.4259	15.2872	15.6511	14.3037	14.2422	15.4002	14.7347	15.0269	15.4694	15.0948
1176.58	8499.23	14.8882	15.1563	15.9882	15.5781	15.8003	16.035	12.6309	13.992	16.0991	16.237	16.3281	16.696	17.071	16.3271	15.0231	16.2751	15.5484	15.0119	14.8702	14.1315	13.9981	15.0919	15.0323	14.4083	14.8358	14.084	14.0473	14.3534	14.3755	15.408	14.4834	15.034	14.6765	15.3693	15.0745	15.5156	15.2737	15.0853	15.4808	15.3435	15.7129	14.3555	14.2712	15.4578	14.7929	15.0372	15.5249	15.1473
1178.51	8485.32	14.9617	15.2302	16.057	15.6496	15.8795	16.1289	12.6875	14.0692	16.1841	16.3211	16.394	16.7639	17.1594	16.4126	15.0995	16.3642	15.6571	15.0844	14.9479	14.2155	14.0409	15.1544	15.1128	14.4881	14.9096	14.1491	14.1163	14.45	14.445	15.4807	14.5497	15.1067	14.7427	15.4465	15.1484	15.5848	15.3423	15.163	15.5779	15.4404	15.7559	14.422	14.3159	15.5279	14.8731	15.0687	15.5986	15.1988
1180.44	8471.45	15.0148	15.285	16.111	15.6995	15.9453	16.2124	12.737	14.0951	16.2581	16.3807	16.4466	16.807	17.2245	16.4714	15.1541	16.4337	15.7546	15.1389	15.0006	14.2695	14.0994	15.2036	15.171	14.5366	14.9341	14.1967	14.1591	14.5156	14.4896	15.5347	14.5968	15.1598	14.7926	15.4751	15.1981	15.638	15.3974	15.1981	15.6332	15.4808	15.8226	14.4669	14.358	15.5758	14.8976	15.1261	15.653	15.2469
1182.36	8457.63	15.0837	15.3601	16.183	15.7719	16.027	16.2863	12.8128	14.1738	16.3293	16.4468	16.5255	16.8874	17.3083	16.5518	15.2248	16.5116	15.8579	15.2091	15.0714	14.3218	14.2	15.2783	15.2453	14.6167	14.9521	14.2538	14.2218	14.568	14.5492	15.6027	14.6634	15.2302	14.8655	15.5484	15.2668	15.6978	15.4705	15.2567	15.6872	15.5233	15.921	14.5346	14.4329	15.6417	14.95	15.2317	15.7194	15.3382
1184.29	8443.86	15.13	15.4109	16.2276	15.8226	16.0809	16.2934	12.8563	14.2463	16.3847	16.5063	16.5795	16.944	17.3726	16.6098	15.2754	16.5698	15.9167	15.2576	15.1208	14.3518	14.246	15.3402	15.3	14.6671	14.9451	14.2973	14.2679	14.5897	14.5874	15.6501	14.718	15.2776	14.9094	15.5951	15.3145	15.7353	15.5413	15.3016	15.7331	15.5841	15.9769	14.608	14.5044	15.6869	15.0146	15.3132	15.77	15.3875
1186.22	8430.13	15.1938	15.4746	16.3042	15.8831	16.1474	16.3696	12.9083	14.2708	16.4608	16.5701	16.6509	17.0082	17.4479	16.6865	15.3414	16.6393	15.965	15.3207	15.1762	14.4066	14.2973	15.41	15.3673	14.7108	15.0096	14.3561	14.329	14.6562	14.6453	15.7165	14.7786	15.3432	14.9667	15.6869	15.3861	15.8123	15.6232	15.3466	15.7862	15.6746	16.0391	14.6868	14.5779	15.7494	15.0721	15.377	15.833	15.4425
1188.15	8416.44	15.2385	15.5148	16.3667	15.9268	16.1937	16.4412	12.9472	14.2978	16.4885	16.6137	16.6988	17.0693	17.5062	16.7411	15.3834	16.6891	15.996	15.3676	15.213	14.44	14.3391	15.438	15.4137	14.7569	15.0728	14.3987	14.3776	14.6862	14.6955	15.761	14.8192	15.3873	15.0122	15.7194	15.4334	15.8692	15.6525	15.3927	15.8389	15.7181	16.0856	14.7273	14.6116	15.7951	15.1219	15.4016	15.8792	15.4788
1190.08	8402.8	15.3035	15.5787	16.4381	15.9924	16.2587	16.5151	12.9937	14.3742	16.5356	16.6749	16.7637	17.147	17.5882	16.8087	15.4454	16.7614	16.0539	15.4338	15.2787	14.5002	14.3953	15.4928	15.4802	14.8447	15.1327	14.4535	14.44	14.7104	14.7585	15.8249	14.8798	15.4418	15.0764	15.7868	15.4927	15.9174	15.7024	15.46	15.9236	15.7608	16.1487	14.7903	14.6525	15.8504	15.2139	15.4403	15.9314	15.5439
1192.01	8389.2	15.3452	15.6251	16.4847	16.0361	16.3038	16.5449	13.0178	14.4111	16.5763	16.7441	16.7976	17.1849	17.6287	16.8545	15.4912	16.8145	16.0941	15.4724	15.3241	14.5298	14.4417	15.5357	15.5262	14.903	15.1534	14.4926	14.4806	14.7444	14.7888	15.8679	14.9256	15.4834	15.1119	15.8181	15.5426	15.9517	15.739	15.4957	15.9847	15.8007	16.189	14.8352	14.7012	15.8924	15.2599	15.4945	15.9785	15.582
1193.94	8375.65	15.4033	15.6885	16.5426	16.087	16.3729	16.6152	13.0679	14.4607	16.6415	16.82	16.8563	17.2548	17.6988	16.9227	15.5529	16.8844	16.1532	15.5268	15.3821	14.5809	14.5142	15.5835	15.5904	14.9547	15.208	14.5423	14.5411	14.811	14.841	15.9253	14.9813	15.5427	15.1632	15.876	15.6005	16.0098	15.7852	15.5507	16.0403	15.846	16.2614	14.8847	14.7583	15.952	15.3129	15.5646	16.039	15.6439
1195.87	8362.14	15.4408	15.7249	16.5818	16.1245	16.4138	16.6763	13.1128	14.5111	16.6887	16.8432	16.9	17.3053	17.7581	16.9654	15.5929	16.9327	16.2092	15.5671	15.4168	14.6242	14.5793	15.6162	15.6329	14.9663	15.2596	14.5787	14.5784	14.8774	14.8918	15.9636	15.0106	15.5783	15.2032	15.9016	15.6339	16.0406	15.8251	15.5998	16.0729	15.9012	16.3032	14.9167	14.7966	15.9924	15.3261	15.5913	16.0782	15.6965
1197.79	8348.68	15.4986	15.7739	16.6441	16.1795	16.4696	16.738	13.1532	14.5524	16.7603	16.8972	16.9594	17.3509	17.8284	17.0298	15.6465	16.9955	16.2696	15.627	15.4865	14.6666	14.6547	15.6785	15.6904	14.9876	15.2879	14.6261	14.625	14.9319	14.9407	16.0201	15.0613	15.6288	15.2551	15.9696	15.685	16.0938	15.902	15.6484	16.1336	15.9718	16.3494	14.9671	14.8531	16.047	15.3887	15.6338	16.128	15.7327
1199.72	8335.25	15.5351	15.8116	16.6804	16.2126	16.5094	16.7772	13.1645	14.5438	16.8202	16.9555	16.9957	17.3804	17.8697	17.0795	15.683	17.0411	16.2962	15.667	15.5308	14.7042	14.6721	15.7053	15.7299	15.0423	15.3149	14.6538	14.6547	14.9528	14.9697	16.0556	15.0993	15.6667	15.2896	16.0084	15.7204	16.1339	15.9567	15.6733	16.1619	16.0113	16.3799	15.0015	14.8831	16.0806	15.467	15.6509	16.1603	15.7473
1201.65	8321.87	15.5871	15.8739	16.7171	16.2604	16.5643	16.846	13.2039	14.596	16.8784	17.0337	17.0456	17.4469	17.9294	17.1506	15.7407	17.0986	16.3423	15.7204	15.5801	14.7639	14.7096	15.7651	15.7843	15.091	15.3797	14.6992	14.6998	14.9711	15.0274	16.104	15.1465	15.7188	15.3417	16.0491	15.7777	16.1763	16.0164	15.7232	16.2054	16.0637	16.4304	15.0353	14.9441	16.1262	15.5351	15.6669	16.2072	15.7932
1203.58	8308.54	15.6208	15.9107	16.7213	16.2951	16.5992	16.8781	13.2184	14.6312	16.8949	17.0638	17.0763	17.4756	17.9798	17.1864	15.775	17.1326	16.3955	15.7552	15.6118	14.7837	14.7459	15.8052	15.8171	15.0958	15.3807	14.731	14.729	15.0009	15.0642	16.1355	15.1759	15.7511	15.3691	16.0699	15.8043	16.1948	16.0409	15.7604	16.246	16.0849	16.4777	15.0628	14.9772	16.1534	15.5227	15.684	16.2429	15.829
1205.51	8295.24	15.6656	15.957	16.7576	16.3453	16.6486	16.9091	13.262	14.6806	16.938	17.0993	17.1177	17.5125	18.0418	17.2348	15.8225	17.1852	16.4329	15.8023	15.6542	14.8258	14.7831	15.8671	15.8693	15.1362	15.4008	14.7721	14.7777	15.0782	15.1046	16.1873	15.2241	15.7944	15.424	16.1209	15.8399	16.2302	16.083	15.8028	16.2998	16.1543	16.53	15.1266	15.0197	16.198	15.5314	15.732	16.2882	15.8826
1207.44	8281.99	15.695	15.9829	16.8217	16.3726	16.6821	16.9331	13.298	14.7267	16.9861	17.126	17.1505	17.5579	18.0753	17.2698	15.85	17.221	16.4495	15.833	15.6765	14.8674	14.7897	15.9216	15.9009	15.1372	15.4284	14.7951	14.8044	15.1047	15.124	16.2211	15.2486	15.8211	15.4582	16.1758	15.8642	16.2726	16.0999	15.8233	16.3407	16.2046	16.5465	15.1757	15.0527	16.2293	15.5757	15.7915	16.3194	15.9152
1209.37	8268.78	15.7457	16.0286	16.9048	16.4172	16.7354	16.9783	13.3288	14.7696	17.0518	17.1766	17.2004	17.6269	18.1378	17.3263	15.9008	17.2764	16.5204	15.8842	15.7224	14.9205	14.8492	15.9715	15.9531	15.1766	15.4728	14.8325	14.8487	15.1415	15.1657	16.2656	15.2938	15.8689	15.4949	16.2248	15.9039	16.3249	16.1353	15.8699	16.3977	16.2147	16.5977	15.2094	15.0815	16.2777	15.6371	15.8519	16.3614	15.948
1211.3	8255.62	15.7737	16.0583	16.9364	16.445	16.7648	17.0014	13.3552	14.7898	17.0806	17.2162	17.2234	17.6505	18.1795	17.3607	15.9291	17.3135	16.5522	15.9138	15.7538	14.9458	14.89	15.9668	15.9858	15.2161	15.5114	14.8561	14.8822	15.1671	15.1968	16.2906	15.3223	15.901	15.5121	16.2588	15.9419	16.3475	16.1643	15.8974	16.4131	16.2242	16.6318	15.2269	15.0876	16.2966	15.6597	15.8752	16.3823	15.9577
1213.23	8242.49	15.8148	16.1027	16.9783	16.4852	16.8115	17.0474	13.3963	14.8393	17.127	17.2363	17.2635	17.6932	18.2296	17.4026	15.969	17.3605	16.6058	15.9587	15.8066	14.9889	14.9127	15.9849	16.0324	15.2736	15.5705	14.8933	14.9294	15.1891	15.2352	16.3326	15.3673	15.9516	15.5432	16.2849	15.9894	16.3807	16.2064	15.9341	16.4405	16.2539	16.6821	15.2826	15.142	16.3344	15.706	15.9153	16.4183	15.9984
1215.15	8229.41	15.8386	16.13	17.0007	16.5098	16.8426	17.0807	13.4028	14.8628	17.1506	17.2458	17.2881	17.7216	18.2652	17.4291	15.9938	17.3958	16.6669	15.9869	15.8383	15.0062	14.9269	16.0057	16.0588	15.2975	15.5988	14.9158	14.9475	15.2023	15.2562	16.3591	15.3963	15.9721	15.5641	16.3071	16.007	16.4176	16.2382	15.9571	16.4652	16.2874	16.7085	15.2834	15.1768	16.3616	15.7175	15.9421	16.4466	16.0406
1217.08	8216.37	15.8821	16.1745	17.0462	16.5504	16.8834	17.1322	13.4428	14.8847	17.1729	17.2964	17.323	17.7632	18.3213	17.4797	16.0332	17.4379	16.7178	16.0297	15.8809	15.0408	14.9655	16.0511	16.1012	15.3317	15.5922	14.9473	14.9778	15.221	15.2935	16.4001	15.4269	15.9913	15.609	16.3308	16.0448	16.4391	16.2857	15.9882	16.5223	16.3361	16.7408	15.3002	15.2029	16.3983	15.7457	15.9865	16.486	16.0864
1219.01	8203.37	15.9052	16.1951	17.0714	16.5725	16.9047	17.1566	13.4616	14.8919	17.1837	17.3195	17.3439	17.7887	18.3562	17.5115	16.0528	17.4586	16.7364	16.0513	15.9036	15.072	14.9569	16.0715	16.1247	15.354	15.5942	14.9636	14.9918	15.2278	15.3096	16.4179	15.4474	16.0023	15.6394	16.3627	16.062	16.4564	16.3116	16.0081	16.5548	16.3517	16.7714	15.3129	15.2205	16.4209	15.757	15.979	16.5057	16.095
1220.94	8190.41	15.9396	16.2308	17.1044	16.6088	16.9457	17.188	13.4859	14.9183	17.228	17.3467	17.3914	17.8271	18.3995	17.5567	16.0915	17.4994	16.7698	16.0918	15.9477	15.0986	14.988	16.1126	16.1673	15.4126	15.6455	14.9946	15.0261	15.2946	15.3449	16.4534	15.4828	16.0338	15.6782	16.3992	16.0989	16.5114	16.3617	16.0406	16.5772	16.3896	16.8121	15.3497	15.2631	16.4538	15.7883	15.9873	16.5389	16.1141
1222.87	8177.49	15.959	16.2586	17.1297	16.6296	16.9716	17.242	13.5096	14.9415	17.2485	17.3861	17.4191	17.8386	18.433	17.5811	16.1192	17.5288	16.7744	16.1181	15.9725	15.1044	15.0394	16.1361	16.1956	15.4391	15.69	15.0119	15.0474	15.3324	15.3718	16.4766	15.5062	16.0584	15.7007	16.4217	16.1296	16.5311	16.3851	16.0651	16.584	16.4324	16.834	15.3615	15.3102	16.4707	15.8182	16.0015	16.5621	16.1405
1224.8	8164.61	15.9991	16.3018	17.163	16.6613	17.0125	17.3021	13.5427	14.9695	17.2817	17.4286	17.4531	17.8661	18.4865	17.6316	16.156	17.5684	16.8014	16.1583	16.0071	15.1331	15.106	16.1789	16.2315	15.4712	15.7354	15.0373	15.0839	15.3316	15.4079	16.5101	15.538	16.0914	15.7346	16.4401	16.1624	16.5491	16.4002	16.0954	16.6072	16.4781	16.8655	15.4098	15.3495	16.5004	15.8661	16.0591	16.5922	16.1802
1226.73	8151.77	16.0161	16.3186	17.1493	16.6748	17.032	17.3136	13.5472	14.9832	17.3032	17.4377	17.4635	17.8984	18.5111	17.6533	16.1701	17.5817	16.8099	16.1754	16.0287	15.1273	15.1294	16.2074	16.2466	15.4998	15.7115	15.0481	15.0984	15.3442	15.4163	16.5242	15.5561	16.1049	15.7434	16.4537	16.1784	16.564	16.4056	16.1108	16.642	16.484	16.8798	15.4413	15.3462	16.5116	15.8983	16.0847	16.6052	16.1905
1228.66	8138.98	16.0446	16.3461	17.1589	16.7054	17.0646	17.3238	13.5885	15.0226	17.3395	17.4581	17.4922	17.9413	18.5394	17.6861	16.2042	17.6191	16.8393	16.2088	16.0514	15.1513	15.1793	16.2426	16.2875	15.5314	15.7165	15.0725	15.1293	15.4053	15.4479	16.5568	15.5878	16.135	15.7751	16.4944	16.2084	16.601	16.4382	16.149	16.7112	16.4646	16.9078	15.4766	15.3676	16.5416	15.9315	16.1136	16.636	16.2139
1230.58	8126.22	16.0645	16.3596	17.2061	16.7235	17.0826	17.3391	13.5977	15.0366	17.3595	17.4803	17.5084	17.9391	18.5623	17.7084	16.2199	17.6454	16.8715	16.2283	16.0623	15.1787	15.2009	16.2639	16.307	15.5385	15.7375	15.0854	15.1449	15.4334	15.4656	16.5745	15.6012	16.1518	15.7898	16.5195	16.2185	16.6134	16.4594	16.1558	16.7514	16.5048	16.9254	15.5017	15.396	16.5594	15.9384	16.1478	16.6534	16.2363
1232.51	8113.5	16.0999	16.3965	17.268	16.7557	17.1169	17.3784	13.5867	15.0562	17.3953	17.5186	17.5399	17.9706	18.6176	17.7471	16.2524	17.681	16.9243	16.2641	16.0993	15.2165	15.2186	16.275	16.3418	15.5398	15.7776	15.1106	15.1704	15.4377	15.49	16.6048	15.6303	16.1868	15.8156	16.556	16.2502	16.6396	16.4986	16.1736	16.7677	16.5709	16.9669	15.5246	15.4309	16.5879	15.9827	16.1965	16.6796	16.2576
1234.44	8100.82	16.1149	16.4164	17.2737	16.7684	17.1337	17.3722	13.5889	15.0425	17.4195	17.5482	17.5506	18.0096	18.6415	17.7651	16.2688	17.7005	16.9434	16.2825	16.1221	15.2336	15.217	16.2765	16.3587	15.5666	15.7831	15.1216	15.1828	15.4422	15.5012	16.6187	15.6478	16.2083	15.8239	16.5721	16.2629	16.6554	16.517	16.1805	16.7464	16.5965	16.9969	15.5674	15.4348	16.5973	16.0052	16.2309	16.6897	16.2535
1236.37	8088.19	16.1484	16.4544	17.3054	16.7964	17.1686	17.3976	13.6115	15.0776	17.4624	17.5881	17.571	18.0428	18.6796	17.8065	16.2999	17.7298	16.9616	16.3158	16.168	15.2484	15.2625	16.3165	16.3862	15.6117	15.8007	15.1432	15.2158	15.4839	15.5352	16.6515	15.6782	16.24	15.8577	16.6058	16.2987	16.6877	16.5447	16.2054	16.7523	16.6184	17.0135	15.6054	15.4442	16.6279	16.0391	16.272	16.7165	16.2829
1238.3	8075.59	16.16	16.4685	17.3047	16.809	17.1837	17.4344	13.6176	15.0916	17.4677	17.5783	17.577	18.0422	18.694	17.8228	16.3135	17.7414	16.9737	16.3277	16.1837	15.2539	15.283	16.323	16.401	15.6082	15.7955	15.1492	15.2306	15.4742	15.5497	16.6638	15.6908	16.2451	15.8766	16.6035	16.3103	16.6776	16.5529	16.2158	16.7773	16.6209	17.0054	15.5809	15.4495	16.6336	16.0625	16.252	16.7296	16.3013
1240.23	8063.03	16.1859	16.4898	17.3051	16.8354	17.2077	17.4493	13.649	15.125	17.4875	17.5866	17.5953	18.072	18.7168	17.8437	16.3429	17.7713	16.9946	16.3555	16.205	15.2856	15.3097	16.3535	16.4369	15.618	15.8151	15.169	15.2501	15.4781	15.5708	16.6916	15.712	16.2614	15.9049	16.63	16.3281	16.6837	16.5695	16.2379	16.8262	16.6474	17.0369	15.5791	15.4876	16.6517	16.0847	16.2342	16.7517	16.3286
1242.16	8050.51	16.2045	16.5027	17.3354	16.8415	17.2191	17.4568	13.6505	15.1667	17.5108	17.6216	17.5979	18.0846	18.7351	17.858	16.3521	17.7808	17.0262	16.3677	16.214	15.2933	15.3143	16.364	16.4509	15.6379	15.8407	15.1774	15.2528	15.4962	15.573	16.7021	15.7253	16.2739	15.9128	16.6526	16.3425	16.6995	16.5685	16.2533	16.8549	16.6608	17.0623	15.6081	15.5092	16.6619	16.0735	16.2514	16.7592	16.3353
1244.09	8038.03	16.231	16.5321	17.3826	16.859	17.2446	17.467	13.6702	15.1744	17.5272	17.6686	17.6156	18.0995	18.7671	17.8875	16.372	17.8037	17.0712	16.3916	16.2357	15.3224	15.3272	16.3732	16.4744	15.6707	15.8727	15.1907	15.2727	15.5124	15.5925	16.7203	15.7467	16.2883	15.9259	16.6802	16.3566	16.7245	16.5923	16.2732	16.8686	16.6817	17.0795	15.6586	15.5279	16.6804	16.0627	16.3173	16.7748	16.3495
1246.02	8025.58	16.2392	16.5426	17.3887	16.865	17.2468	17.4676	13.6884	15.163	17.5171	17.6622	17.6153	18.1058	18.772	17.8877	16.3719	17.8094	17.0791	16.3965	16.243	15.3269	15.3204	16.3733	16.4777	15.6537	15.8521	15.1889	15.281	15.5062	15.5904	16.7249	15.744	16.2859	15.9296	16.6744	16.3616	16.7235	16.6015	16.2758	16.8504	16.6745	17.0736	15.6619	15.5288	16.6808	16.0613	16.327	16.7753	16.3561
1247.94	8013.18	16.2696	16.5681	17.4135	16.8803	17.2591	17.5016	13.7021	15.1599	17.5427	17.6561	17.6317	18.1143	18.7896	17.9017	16.3856	17.8229	17.0846	16.4101	16.257	15.3309	15.311	16.4014	16.4927	15.6593	15.8497	15.1931	15.3002	15.5289	15.6006	16.7413	15.7588	16.312	15.9474	16.6794	16.3828	16.7396	16.6173	16.2878	16.8622	16.6651	17.0874	15.6852	15.5259	16.6876	16.084	16.3153	16.7826	16.3596
1249.87	8000.81	16.2808	16.5769	17.4017	16.871	17.2585	17.5073	13.6738	15.1228	17.5467	17.619	17.6181	18.0811	18.7736	17.8951	16.3759	17.8083	17.0473	16.3962	16.2624	15.3171	15.3117	16.403	16.4822	15.6349	15.8341	15.1797	15.2929	15.5407	15.593	16.732	15.7483	16.304	15.9372	16.6654	16.3662	16.727	16.6166	16.2694	16.8462	16.6403	17.0811	15.6543	15.4956	16.6699	16.0845	16.2936	16.7646	16.3372
1251.8	7988.49	16.3006	16.5966	17.3678	16.8638	17.2621	17.5074	13.6619	15.1038	17.52	17.604	17.596	18.0596	18.7524	17.8804	16.365	17.7844	17.023	16.384	16.2589	15.2943	15.3336	16.4134	16.4714	15.6065	15.8043	15.1689	15.2858	15.523	15.5874	16.7209	15.7292	16.2804	15.9177	16.6436	16.3505	16.7065	16.6059	16.2551	16.8325	16.6247	17.0657	15.6346	15.4864	16.6406	16.0723	16.2814	16.7381	16.321
1253.73	7976.2	16.3041	16.597	17.3034	16.8195	17.2203	17.4651	13.6037	15.0366	17.4385	17.5416	17.5243	18.0025	18.6855	17.8175	16.3088	17.7174	16.9735	16.3306	16.1977	15.2431	15.2882	16.3555	16.4159	15.5548	15.7239	15.1198	15.2397	15.4527	15.5414	16.6696	15.6725	16.2214	15.8624	16.5908	16.2914	16.6457	16.5446	16.2031	16.7716	16.5921	17.0012	15.5627	15.4449	16.5691	16.0005	16.2209	16.6666	16.2622
1255.66	7963.94	16.3245	16.6159	17.2837	16.765	17.177	17.4313	13.5413	14.9718	17.3573	17.4602	17.4387	17.9194	18.6056	17.7446	16.2429	17.6352	16.8966	16.2628	16.1425	15.1856	15.218	16.2704	16.3477	15.4845	15.6706	15.0591	15.1861	15.418	15.4869	16.6105	15.6057	16.1545	15.8014	16.5444	16.2211	16.5871	16.4704	16.1425	16.6895	16.5263	16.9121	15.4762	15.387	16.4932	15.9077	16.124	16.5769	16.1724
1257.59	7951.73	16.3323	16.6206	17.2392	16.6957	17.1199	17.3711	13.4662	14.865	17.2625	17.3536	17.338	17.8061	18.5054	17.6599	16.1629	17.5325	16.8136	16.1715	16.0752	15.095	15.1429	16.1717	16.2645	15.3922	15.591	14.9872	15.1207	15.3432	15.4113	16.5343	15.5303	16.0782	15.7295	16.4683	16.1531	16.5125	16.3789	16.0705	16.6027	16.4277	16.8068	15.3973	15.2976	16.3998	15.8116	15.9995	16.4758	16.0633
1259.52	7939.55	16.3465	16.6293	17.1879	16.6679	17.0886	17.3174	13.4117	14.8053	17.2131	17.301	17.2836	17.7427	18.4472	17.6141	16.123	17.4765	16.7714	16.1328	16.0415	15.0424	15.1023	16.1283	16.2247	15.3557	15.5324	14.9469	15.095	15.2812	15.3727	16.4924	15.4999	16.052	15.7098	16.4324	16.1323	16.4702	16.3433	16.0434	16.5603	16.3756	16.7702	15.3687	15.2448	16.354	15.7583	15.9515	16.4293	16.0216
1261.45	7927.41	16.3434	16.6246	17.1712	16.6816	17.0871	17.3211	13.41	14.8214	17.215	17.3059	17.2878	17.7434	18.4478	17.6241	16.1286	17.4828	16.774	16.1418	16.0441	15.0437	15.098	16.1418	16.2294	15.3693	15.5174	14.9432	15.1034	15.2849	15.3744	16.4982	15.5172	16.0777	15.7249	16.4387	16.1525	16.4823	16.3597	16.0675	16.5798	16.3892	16.7951	15.3785	15.2612	16.3607	15.761	15.9808	16.4468	16.0438
1263.37	7915.31	16.3731	16.6601	17.2662	16.7705	17.1657	17.3982	13.4977	14.9202	17.3294	17.4314	17.3994	17.8566	18.5664	17.7254	16.2268	17.6026	16.8741	16.2366	16.1346	15.135	15.2131	16.2502	16.3323	15.4581	15.5997	15.0156	15.177	15.3726	15.4548	16.5924	15.6101	16.1673	15.8144	16.5413	16.2407	16.5917	16.4622	16.159	16.693	16.5147	16.9128	15.4664	15.3686	16.4673	15.8913	16.0928	16.5564	16.153
1265.3	7903.24	16.3864	16.6809	17.3684	16.8645	17.2565	17.474	13.5953	15.0297	17.4621	17.5674	17.5323	18.0004	18.7108	17.8431	16.3398	17.7467	16.9911	16.3544	16.2446	15.2403	15.3559	16.3742	16.4576	15.5792	15.735	15.1015	15.2573	15.4669	15.5504	16.6956	15.7133	16.2632	15.9126	16.6427	16.3344	16.7028	16.5812	16.2537	16.8181	16.6298	17.0397	15.5996	15.4733	16.5917	16.038	16.2061	16.6861	16.2712
1267.23	7891.21	16.4211	16.7271	17.4988	16.9595	17.3537	17.5788	13.7019	15.1464	17.5876	17.7129	17.6663	18.1382	18.8593	17.9829	16.4616	17.8859	17.1349	16.4773	16.3641	15.346	15.4744	16.4943	16.584	15.7064	15.8632	15.1907	15.3495	15.5683	15.6488	16.8065	15.8231	16.3765	16.0111	16.7523	16.4451	16.799	16.6933	16.3447	16.9371	16.7522	17.1578	15.7199	15.5836	16.7254	16.1606	16.345	16.8116	16.3851
1269.16	7879.22	16.4354	16.7476	17.5641	17.0093	17.4107	17.6499	13.7677	15.2359	17.6625	17.7927	17.7462	18.2061	18.9514	18.0697	16.5348	17.9724	17.2244	16.5545	16.435	15.4078	15.5289	16.5641	16.6653	15.7925	15.9165	15.2425	15.4126	15.6408	15.7141	16.8769	15.8869	16.4532	16.0621	16.8228	16.5145	16.8606	16.7663	16.3946	17.017	16.8324	17.2386	15.7943	15.6472	16.805	16.2227	16.4472	16.8911	16.4572
1271.09	7867.27	16.4496	16.7609	17.5876	17.0523	17.4558	17.6782	13.8148	15.295	17.7215	17.8428	17.7962	18.2671	19.0045	18.1301	16.5826	18.0313	17.2799	16.6162	16.4845	15.4591	15.5631	16.6222	16.726	15.8342	15.956	15.2765	15.4596	15.6899	15.7651	16.9275	15.9287	16.5017	16.1035	16.8699	16.5642	16.91	16.8175	16.4363	17.0673	16.8673	17.3076	15.8481	15.6941	16.854	16.2848	16.4993	16.9475	16.5117
1273.02	7855.35	16.4475	16.7571	17.6136	17.0747	17.4781	17.7005	13.8279	15.3091	17.7407	17.8685	17.8067	18.312	19.0245	18.1523	16.6004	18.055	17.3187	16.6358	16.5047	15.4847	15.5774	16.6391	16.747	15.8498	15.9762	15.2853	15.4722	15.6814	15.7767	16.9478	15.9507	16.5149	16.1166	16.8779	16.5809	16.9245	16.8276	16.4506	17.0838	16.8817	17.3298	15.8546	15.7368	16.8751	16.3312	16.5162	16.9718	16.5356
1274.95	7843.46	16.4706	16.7832	17.6521	17.1072	17.5148	17.738	13.8598	15.3433	17.7799	17.9161	17.8381	18.3464	19.0652	18.1956	16.6415	18.0993	17.3671	16.664	16.5453	15.5269	15.6119	16.6765	16.7819	15.89	16.03	15.3101	15.4951	15.6971	15.8014	16.9797	15.9858	16.5375	16.1483	16.8982	16.6026	16.9472	16.8482	16.4753	17.1209	16.9069	17.3557	15.8692	15.7742	16.9086	16.3715	16.5405	17.0085	16.5696
1276.88	7831.61	16.4746	16.7895	17.6548	17.1166	17.5321	17.743	13.872	15.3446	17.8091	17.9335	17.8499	18.3375	19.0851	18.2108	16.6591	18.1213	17.397	16.6743	16.5597	15.5341	15.6241	16.6933	16.8022	15.8904	16.0424	15.3188	15.5032	15.7304	15.8134	16.99	15.9948	16.5413	16.1636	16.9094	16.6068	16.9525	16.8507	16.4785	17.1471	16.9264	17.3697	15.8692	15.764	16.92	16.3743	16.5333	17.0264	16.5764
1278.81	7819.8	16.4961	16.8118	17.6848	17.1406	17.5621	17.7996	13.8869	15.3698	17.8473	17.9644	17.8714	18.3712	19.119	18.242	16.6861	18.1565	17.4316	16.7	16.5948	15.5513	15.6436	16.7189	16.834	15.921	16.0409	15.3351	15.5229	15.781	15.8296	17.0165	16.018	16.5687	16.1873	16.9378	16.6284	16.976	16.8789	16.5015	17.1798	16.9446	17.4142	15.8969	15.7817	16.9431	16.3968	16.562	17.0467	16.593
1280.73	7808.02	16.497	16.8136	17.681	17.1432	17.5664	17.8355	13.8839	15.3494	17.8453	17.9795	17.8778	18.3919	19.1277	18.2551	16.6916	18.1697	17.4227	16.7071	16.6148	15.5538	15.6422	16.7104	16.8389	15.9336	16.0082	15.333	15.5269	15.7804	15.8322	17.0227	16.0176	16.5689	16.1872	16.9308	16.632	16.9779	16.8973	16.5078	17.1912	16.9439	17.4251	15.9077	15.801	16.9453	16.4051	16.5803	17.048	16.6048
1282.66	7796.28	16.5148	16.8338	17.6623	17.1613	17.587	17.8816	13.9122	15.3523	17.8626	18.0034	17.9059	18.4062	19.1501	18.2807	16.7177	18.1937	17.4598	16.7246	16.6446	15.5726	15.6824	16.7163	16.8598	15.9488	15.9989	15.3475	15.5424	15.7806	15.8534	17.0424	16.037	16.5796	16.2044	16.9441	16.6579	17.0032	16.9242	16.5274	17.2238	16.9636	17.4346	15.9425	15.8219	16.9586	16.4237	16.576	17.0678	16.6235
1284.59	7784.58	16.5187	16.8421	17.637	17.1687	17.5959	17.8522	13.9207	15.3745	17.8694	18.0153	17.9174	18.405	19.1607	18.2907	16.7299	18.2127	17.4677	16.7317	16.646	15.5921	15.7167	16.7353	16.8785	15.9519	16.0011	15.3523	15.5439	15.7892	15.8654	17.051	16.0465	16.5887	16.215	16.9545	16.6684	17.0152	16.9372	16.538	17.2311	16.976	17.4464	15.9404	15.8311	16.9669	16.4202	16.5763	17.0764	16.6154
1286.52	7772.91	16.5396	16.8665	17.6889	17.1832	17.6198	17.8597	13.9245	15.3907	17.8884	18.0487	17.9434	18.4309	19.1922	18.3139	16.7471	18.2358	17.473	16.7571	16.6613	15.6361	15.7473	16.7708	16.9058	15.9687	16.0291	15.3652	15.5638	15.7885	15.8872	17.0711	16.0659	16.6035	16.236	16.9873	16.6827	17.0276	16.9547	16.5546	17.2492	17.0124	17.4722	15.9581	15.8594	16.9949	16.4392	16.6203	17.0913	16.6272
1288.45	7761.27	16.5305	16.8535	17.718	17.1744	17.614	17.8525	13.9206	15.3918	17.8725	18.0485	17.9335	18.4241	19.19	18.307	16.7319	18.2219	17.494	16.7601	16.6575	15.6369	15.7241	16.7773	16.9034	15.9434	16.0209	15.3547	15.5592	15.7505	15.8846	17.0661	16.0551	16.5952	16.225	16.9899	16.6749	17.0188	16.9357	16.5446	17.2403	17.0194	17.4749	15.9672	15.8463	16.9956	16.436	16.633	17.0882	16.6294
1290.38	7749.67	16.5395	16.8592	17.7286	17.1954	17.6275	17.867	13.9328	15.3959	17.8871	18.0421	17.9399	18.436	19.2003	18.3233	16.7496	18.243	17.5165	16.7695	16.6741	15.6399	15.7278	16.7936	16.9215	15.9549	16.0083	15.3615	15.5713	15.7784	15.8991	17.0823	16.0651	16.618	16.2347	17.0068	16.682	17.0369	16.9407	16.5582	17.2414	17.0213	17.4977	16.0006	15.8479	17.007	16.452	16.6349	17.1061	16.6446
1292.31	7738.1	16.542	16.8609	17.7474	17.2038	17.6386	17.8928	13.9117	15.3884	17.8961	18.0393	17.9371	18.4388	19.2071	18.3327	16.7565	18.2537	17.5227	16.7645	16.673	15.6338	15.7212	16.7851	16.92	15.9635	15.9821	15.359	15.5771	15.7833	15.8929	17.0865	16.0704	16.6341	16.233	17.0104	16.6893	17.0453	16.9466	16.5643	17.2274	17.0112	17.496	16.0069	15.8605	17.0046	16.4666	16.6128	17.1091	16.6471
1294.24	7726.57	16.562	16.8842	17.7644	17.2229	17.6611	17.9032	13.9119	15.4158	17.9114	18.0686	17.9583	18.4565	19.2376	18.3565	16.7811	18.2834	17.5643	16.7789	16.6975	15.6397	15.7389	16.7899	16.9439	15.9732	16.021	15.373	15.6015	15.8071	15.9017	17.1061	16.099	16.6525	16.2598	17.0127	16.7169	17.0542	16.9691	16.5815	17.2446	17.0204	17.5181	16.0075	15.8849	17.0215	16.4698	16.6172	17.1248	16.6586
1296.16	7715.07	16.5556	16.8772	17.7447	17.2168	17.653	17.8783	13.9003	15.4168	17.8854	18.0669	17.9506	18.4435	19.2311	18.3511	16.7737	18.2879	17.5612	16.7797	16.7015	15.6254	15.7336	16.7815	16.9486	15.9712	16.0361	15.3647	15.5969	15.7906	15.8987	17.1004	16.0939	16.6312	16.2631	16.9985	16.7122	17.0474	16.9638	16.5657	17.2588	17.0299	17.5106	15.9855	15.8804	17.0164	16.4443	16.6075	17.1195	16.6499
1298.09	7703.61	16.567	16.889	17.7687	17.2275	17.6656	17.9084	13.9119	15.4353	17.8898	18.0814	17.9578	18.4603	19.2461	18.3678	16.788	18.3051	17.5578	16.7892	16.7223	15.6407	15.7558	16.7959	16.9624	15.9879	16.0191	15.3709	15.6044	15.8065	15.9156	17.1111	16.1019	16.6405	16.268	17.0091	16.7246	17.0637	16.978	16.5748	17.2925	17.0608	17.5203	15.9928	15.8817	17.028	16.4743	16.621	17.1328	16.6686
1300.02	7692.18	16.5652	16.8885	17.7591	17.2256	17.6682	17.9307	13.9292	15.4289	17.8944	18.0857	17.9534	18.4675	19.2489	18.3733	16.7898	18.3095	17.555	16.7821	16.7258	15.6371	15.7787	16.8012	16.9611	15.9928	15.9914	15.366	15.5996	15.8299	15.9102	17.1094	16.0936	16.6335	16.263	17.0208	16.7128	17.0674	16.9859	16.5756	17.2956	17.0636	17.534	15.988	15.8773	17.0225	16.4932	16.5978	17.1376	16.6726
1301.95	7680.78	16.5739	16.8994	17.7359	17.2391	17.6827	17.9184	13.9505	15.4541	17.9126	18.0847	17.9674	18.4851	19.2627	18.3862	16.8075	18.3265	17.5757	16.7958	16.7308	15.6455	15.8161	16.8363	16.9812	15.9971	15.9851	15.3715	15.6062	15.8192	15.9174	17.1248	16.1018	16.6427	16.277	17.0306	16.7147	17.0846	17.0104	16.5795	17.3025	17.0876	17.5605	15.9996	15.903	17.0242	16.5001	16.6	17.1484	16.6791
1303.88	7669.42	16.5685	16.895	17.7482	17.2373	17.6791	17.891	13.9557	15.4388	17.9212	18.0587	17.9642	18.4809	19.2636	18.3855	16.8051	18.3306	17.5971	16.7931	16.7233	15.6518	15.8127	16.84	16.9834	15.99	15.9833	15.3654	15.6007	15.8057	15.9149	17.1232	16.1036	16.6502	16.2751	17.0288	16.7191	17.079	17.0004	16.5698	17.2967	17.0748	17.556	15.9977	15.9108	17.0237	16.4877	16.6125	17.1429	16.6702
1305.81	7658.09	16.5846	16.9134	17.8249	17.2485	17.697	17.9264	13.994	15.4255	17.9653	18.0943	17.9808	18.5002	19.2921	18.4064	16.8206	18.3545	17.6253	16.8063	16.7436	15.6767	15.8175	16.846	17.0004	16.0081	16.0255	15.3736	15.6191	15.8293	15.9299	17.1373	16.1165	16.6604	16.2913	17.0466	16.7365	17.0773	17.0044	16.5777	17.3095	17.0887	17.5616	16.0196	15.9296	17.0454	16.5215	16.6452	17.1544	16.6788
1307.74	7646.8	16.5781	16.9064	17.836	17.2402	17.6938	17.9357	13.9861	15.4193	17.9662	18.1063	17.9722	18.5022	19.2904	18.4053	16.8131	18.3538	17.6137	16.8055	16.7378	15.6653	15.8046	16.8244	16.9969	15.9937	16.0407	15.365	15.617	15.8168	15.9226	17.1305	16.1073	16.6478	16.2798	17.041	16.7335	17.0672	16.995	16.5699	17.3174	17.0793	17.5689	16.0241	15.9146	17.0441	16.5237	16.6292	17.1482	16.6717
1309.67	7635.53	16.6031	16.9363	17.8593	17.2587	17.7169	17.9639	13.9889	15.4216	17.9858	18.1199	17.9972	18.5309	19.313	18.4405	16.8439	18.3887	17.6328	16.8191	16.7625	15.6881	15.8311	16.8251	17.0247	16.0287	16.0619	15.379	15.6372	15.8218	15.9466	17.1525	16.1386	16.6785	16.2973	17.0643	16.752	17.0852	17.0058	16.5981	17.3456	17.0831	17.611	16.0646	15.9278	17.0649	16.5423	16.6283	17.1642	16.6877
1311.59	7624.31	16.6072	16.9445	17.8609	17.2495	17.7188	17.9533	13.9965	15.4217	17.9958	18.1415	18.009	18.5357	19.3192	18.4432	16.849	18.411	17.6306	16.8246	16.7691	15.6846	15.8322	16.8523	17.039	16.0475	16.0448	15.3794	15.6452	15.8246	15.9488	17.1541	16.1458	16.6844	16.3024	17.0796	16.7497	17.0768	17.0139	16.5964	17.3469	17.066	17.5995	16.0533	15.9366	17.0654	16.5566	16.6532	17.1562	16.6748
1313.52	7613.11	16.6067	16.9339	17.8344	17.2417	17.7186	17.9484	13.9939	15.4364	17.9822	18.1399	18.0025	18.5235	19.3248	18.437	16.8398	18.4068	17.6349	16.8431	16.7648	15.6652	15.8225	16.8798	17.0446	16.0402	16.0258	15.3727	15.6517	15.8393	15.9504	17.1515	16.1238	16.6605	16.3062	17.077	16.7535	17.0767	17.0273	16.5796	17.3352	17.0692	17.5908	16.0138	15.9521	17.0625	16.5595	16.6735	17.1515	16.676
1315.45	7601.95	16.6109	16.9424	17.8455	17.2479	17.7227	17.9663	13.9764	15.4564	17.9914	18.1364	18.0064	18.5187	19.3374	18.4428	16.8526	18.4202	17.6476	16.8376	16.7618	15.6727	15.8379	16.8639	17.0511	16.0295	16.0394	15.3744	15.6468	15.8466	15.9552	17.1554	16.1248	16.6505	16.3117	17.0698	16.7478	17.0787	17.0338	16.5836	17.3381	17.0792	17.6122	15.9957	15.9507	17.0639	16.5542	16.657	17.1553	16.6846
1317.38	7590.82	16.625	16.9679	17.8864	17.2525	17.7396	18.0035	13.9803	15.475	18.0383	18.1769	18.0256	18.5377	19.3633	18.4669	16.8703	18.4457	17.6806	16.8598	16.7886	15.7027	15.8591	16.8493	17.0737	16.0402	16.0716	15.3852	15.6553	15.8456	15.9713	17.1634	16.1454	16.6611	16.3315	17.0661	16.7619	17.0808	17.0469	16.5975	17.3561	17.0975	17.6346	16.0079	15.9495	17.08	16.5762	16.6547	17.1623	16.6861
1319.31	7579.72	16.5974	16.9323	17.8245	17.2217	17.7219	18.0168	13.9342	15.4271	18.0195	18.1857	17.99	18.5039	19.3279	18.4492	16.8264	18.4045	17.6724	16.8499	16.7823	15.686	15.8056	16.8265	17.0403	16.0245	16.0426	15.3533	15.6317	15.8194	15.9393	17.1323	16.1079	16.6351	16.297	17.0445	16.745	17.0552	17.0177	16.5596	17.3495	17.0555	17.5924	15.9936	15.919	17.0503	16.5479	16.6143	17.1345	16.656
1321.24	7568.65	16.6006	16.9314	17.7579	17.2388	17.7322	18.0326	13.926	15.4316	18.019	18.1822	17.9901	18.5015	19.3274	18.4648	16.8354	18.4023	17.6669	16.8434	16.7879	15.6968	15.8258	16.8673	17.0343	16.0161	16.0136	15.3535	15.6374	15.8003	15.9338	17.142	16.1172	16.6512	16.2861	17.0582	16.7489	17.0718	17.0141	16.5592	17.3603	17.0666	17.5854	16.0244	15.9137	17.0439	16.5592	16.6107	17.1469	16.6724
1323.17	7557.62	16.5903	16.9197	17.7082	17.244	17.7255	17.9902	13.9339	15.4309	17.9919	18.1635	17.9802	18.4937	19.3269	18.459	16.8388	18.4092	17.6572	16.8264	16.7632	15.6955	15.8353	16.8728	17.0348	16.016	15.9713	15.3511	15.6353	15.7718	15.9358	17.1438	16.1138	16.6514	16.2782	17.061	16.743	17.0724	17.0058	16.5652	17.344	17.0806	17.5948	16.0229	15.9129	17.0293	16.5526	16.6203	17.1525	16.6739
1325.1	7546.62	16.5955	16.9207	17.7567	17.2542	17.7303	17.9679	13.9491	15.4377	17.9804	18.1742	17.988	18.5061	19.3433	18.4633	16.8487	18.426	17.6575	16.8308	16.7645	15.7024	15.8203	16.8793	17.0514	16.043	15.9675	15.3522	15.6381	15.8031	15.9503	17.1516	16.1146	16.6519	16.2882	17.0647	16.7392	17.0747	17.0025	16.5659	17.3383	17.095	17.6125	16.0283	15.9412	17.0406	16.5539	16.643	17.1571	16.6729
1327.03	7535.65	16.5914	16.9191	17.8204	17.2481	17.7286	17.9826	13.9374	15.4285	17.9726	18.1791	17.9813	18.5129	19.3429	18.467	16.846	18.4277	17.6531	16.8253	16.7679	15.6937	15.8123	16.8615	17.0454	16.0227	15.9685	15.3462	15.6302	15.8231	15.9374	17.1445	16.1146	16.6492	16.2791	17.0596	16.7272	17.061	16.9934	16.5494	17.3466	17.085	17.6053	16.0552	15.9498	17.0394	16.5415	16.653	17.1462	16.6631
1328.95	7524.71	16.5984	16.9287	17.831	17.2487	17.7348	17.9924	13.9354	15.4366	17.967	18.1944	17.981	18.5297	19.3459	18.4745	16.8504	18.4346	17.6525	16.8321	16.7658	15.6921	15.8372	16.8544	17.0503	16.0021	16.0027	15.3496	15.6416	15.8187	15.9332	17.1472	16.1249	16.6665	16.2758	17.0726	16.7386	17.0664	17.0067	16.56	17.3618	17.0786	17.6123	16.0958	15.9428	17.0415	16.5331	16.6635	17.1472	16.6711
1330.88	7513.81	16.5831	16.9117	17.7862	17.2328	17.7195	17.957	13.9274	15.45	17.9355	18.1812	17.9628	18.5149	19.329	18.4551	16.8375	18.4276	17.646	16.821	16.7389	15.6768	15.837	16.8378	17.0448	16.0155	15.9889	15.3341	15.6392	15.7744	15.9212	17.135	16.1148	16.6723	16.2591	17.0631	16.7282	17.0444	17.0042	16.554	17.3355	17.0597	17.614	16.0805	15.9207	17.021	16.5087	16.6478	17.1352	16.6598
1332.81	7502.93	16.6001	16.9316	17.8281	17.2432	17.7376	17.9713	13.9601	15.4589	17.9706	18.1907	17.9863	18.5234	19.3527	18.4749	16.8594	18.4517	17.6909	16.8312	16.7719	15.6892	15.8572	16.8286	17.067	16.0558	15.9675	15.3422	15.6548	15.7918	15.9332	17.1521	16.1265	16.6818	16.2769	17.078	16.7436	17.0437	17.0211	16.5642	17.3292	17.0917	17.6121	16.0671	15.938	17.0313	16.5295	16.6578	17.1435	16.6565
1334.74	7492.09	16.6212	16.9662	17.8823	17.2505	17.7595	18.0135	13.9857	15.4604	18.0386	18.2378	18.0159	18.5387	19.3896	18.5084	16.886	18.4961	17.716	16.8359	16.8098	15.6881	15.9149	16.8357	17.0908	16.0798	15.9687	15.3578	15.6653	15.8076	15.941	17.1653	16.1377	16.6686	16.3022	17.0928	16.7551	17.0564	17.033	16.5738	17.3438	17.1241	17.6127	16.0563	15.9622	17.048	16.5489	16.6681	17.1478	16.6464
1336.67	7481.28	16.66	17.0275	17.9051	17.2602	17.7941	18.0496	14.0081	15.5159	18.1178	18.3083	18.0695	18.568	19.4584	18.5569	16.9341	18.5621	17.7605	16.8714	16.8571	15.7153	16.0011	16.8904	17.1435	16.1303	16.0312	15.3896	15.6894	15.8252	15.9719	17.1893	16.1692	16.6819	16.3477	17.1401	16.7739	17.0821	17.0571	16.6047	17.3988	17.139	17.6567	16.067	15.9941	17.0833	16.5966	16.6954	17.1545	16.6601
1338.6	7470.5	16.6048	16.9652	17.8075	17.1774	17.7332	17.9679	13.9597	15.4583	18.0506	18.2368	18.0129	18.4989	19.4111	18.4985	16.857	18.5009	17.7263	16.882	16.7823	15.6811	15.9068	16.9034	17.1109	16.0931	16.014	15.3413	15.6551	15.7737	15.9341	17.1277	16.1113	16.634	16.2917	17.0907	16.7377	17.0226	16.9963	16.5331	17.3788	17.0606	17.6263	16.0059	15.9427	17.0431	16.5476	16.6487	17.0848	16.6058
1340.53	7459.75	16.5432	16.858	17.7296	17.1257	17.6651	17.9259	13.91	15.3386	17.9174	18.1235	17.9043	18.4395	19.3088	18.4276	16.7528	18.3694	17.6267	16.8612	16.7009	15.6189	15.7648	16.8799	17.0291	16.0005	15.9185	15.2678	15.5967	15.7126	15.8732	17.0644	16.0192	16.5698	16.2112	17.003	16.6852	16.9605	16.9331	16.4478	17.3073	17.0057	17.5549	15.9424	15.892	16.9823	16.4851	16.594	17.0255	16.5572
1342.46	7449.03	16.5446	16.8625	17.7502	17.1668	17.6796	17.9321	13.9099	15.3523	17.9162	18.1234	17.9107	18.4556	19.3171	18.4384	16.79	18.3923	17.6258	16.8144	16.7172	15.6245	15.8072	16.8473	17.0237	15.9558	15.8924	15.2777	15.5829	15.7215	15.874	17.0797	16.0369	16.5754	16.2181	17.0029	16.6824	16.9721	16.9451	16.4732	17.2845	17.0155	17.5586	15.9684	15.9013	16.9735	16.4882	16.6096	17.0567	16.5781
1344.38	7438.35	16.5626	16.8869	17.799	17.1911	17.7026	17.9533	13.9197	15.41	17.9416	18.1362	17.9344	18.4717	19.3475	18.4617	16.8225	18.4349	17.6581	16.8078	16.7313	15.6468	15.8576	16.8233	17.0422	15.9757	15.8975	15.2978	15.5898	15.7264	15.8906	17.0968	16.0675	16.605	16.2352	17.0261	16.6996	16.9915	16.9586	16.4904	17.2947	17.0372	17.5744	16.013	15.9143	16.986	16.5081	16.6326	17.0805	16.6013
1346.31	7427.69	16.5539	16.8781	17.8016	17.1809	17.6934	17.9486	13.9005	15.4162	17.9446	18.1354	17.9227	18.4765	19.3469	18.4558	16.8149	18.4352	17.6472	16.7944	16.7195	15.6405	15.8733	16.8043	17.0379	15.9796	15.8937	15.2865	15.5867	15.7385	15.8841	17.088	16.0619	16.6181	16.2223	17.03	16.6925	16.9739	16.9534	16.4773	17.2925	17.0208	17.5774	16.0113	15.9036	16.9775	16.5187	16.6049	17.0666	16.5895
1348.24	7417.06	16.553	16.8791	17.8027	17.1759	17.6895	17.9567	13.8792	15.4133	17.9654	18.1417	17.9182	18.4926	19.3523	18.4527	16.8118	18.4392	17.6555	16.803	16.7297	15.6454	15.8793	16.8266	17.0433	15.9854	15.8954	15.2804	15.5941	15.7289	15.8802	17.0874	16.0586	16.6129	16.2201	17.0261	16.6937	16.964	16.9601	16.473	17.3028	17.0006	17.5777	16.0099	15.8954	16.9793	16.5243	16.5937	17.0538	16.5844
1350.17	7406.47	16.5319	16.859	17.7835	17.1507	17.6693	17.9523	13.8543	15.3702	17.958	18.1259	17.8979	18.4676	19.3365	18.4332	16.7898	18.4168	17.6317	16.7893	16.7158	15.6223	15.8348	16.8236	17.0206	15.9735	15.8994	15.2552	15.5752	15.6973	15.8557	17.0639	16.0363	16.5757	16.2018	16.9974	16.6655	16.9365	16.9362	16.4514	17.2906	16.9848	17.5498	15.9761	15.8721	16.9538	16.4871	16.6026	17.0329	16.565
1352.1	7395.9	16.5438	16.8777	17.7567	17.1592	17.6846	17.9702	13.8719	15.3591	17.9758	18.1554	17.9158	18.464	19.355	18.4545	16.8131	18.4342	17.6428	16.7923	16.7324	15.6252	15.8368	16.8232	17.03	15.9743	15.888	15.2643	15.5743	15.7385	15.8639	17.0715	16.0464	16.5681	16.2196	16.984	16.665	16.9436	16.9337	16.4604	17.2953	17.0191	17.5555	15.9572	15.8807	16.9562	16.4813	16.6081	17.0397	16.5655
1354.03	7385.37	16.5245	16.8552	17.6927	17.1329	17.6658	17.9417	13.846	15.3461	17.9438	18.1207	17.8922	18.4283	19.3337	18.4295	16.7898	18.4155	17.6367	16.7821	16.7039	15.5999	15.8127	16.7958	17.0143	15.9535	15.8243	15.2454	15.5478	15.7268	15.8417	17.0466	16.0165	16.5313	16.2024	16.964	16.6475	16.9166	16.9125	16.4309	17.2693	17.0036	17.532	15.9137	15.8675	16.9321	16.47	16.5619	17.0129	16.5321
1355.96	7374.86	16.512	16.8375	17.6748	17.1226	17.6563	17.9012	13.8486	15.3356	17.9079	18.0898	17.8791	18.4224	19.3269	18.4152	16.7746	18.3994	17.6308	16.7834	16.6882	15.5892	15.7982	16.7845	17.0119	15.9443	15.798	15.2287	15.5357	15.6849	15.8293	17.0345	16.0064	16.5234	16.1935	16.9494	16.6393	16.9129	16.9084	16.4268	17.2533	16.9648	17.5179	15.9085	15.8509	16.9183	16.4706	16.5388	16.9955	16.5207
1357.89	7364.39	16.5174	16.856	17.7322	17.1288	17.6631	17.9058	13.8662	15.3547	17.9102	18.122	17.8872	18.4411	19.3444	18.4302	16.7927	18.4231	17.6185	16.772	16.703	15.5998	15.8158	16.7718	17.0243	15.9464	15.8253	15.2357	15.538	15.6716	15.8355	17.0432	16.0177	16.5264	16.1988	16.9599	16.6424	16.9258	16.9102	16.444	17.2574	16.9602	17.529	15.9154	15.8558	16.927	16.4796	16.5443	17.001	16.5262
1359.82	7353.94	16.5579	16.9246	17.8355	17.1492	17.7032	17.9512	13.8869	15.4291	17.9873	18.201	17.9393	18.4809	19.415	18.4892	16.8531	18.4966	17.6498	16.7887	16.7539	15.6481	15.8863	16.7916	17.0769	15.9805	15.8853	15.2743	15.5735	15.7151	15.8708	17.0811	16.0675	16.5597	16.2406	16.9983	16.6805	16.941	16.9506	16.4785	17.2992	17.0075	17.5717	15.9597	15.9082	16.9718	16.5252	16.613	17.0235	16.5485
1361.74	7343.52	16.4866	16.8466	17.745	17.0521	17.6374	17.8646	13.8446	15.3643	17.9183	18.1338	17.8605	18.3882	19.3525	18.4194	16.7578	18.4226	17.6065	16.7897	16.6798	15.5952	15.8035	16.7753	17.0312	15.921	15.7952	15.211	15.5348	15.6498	15.8154	17.0047	15.9849	16.4976	16.1636	16.9475	16.614	16.8458	16.889	16.3822	17.2402	16.9388	17.5037	15.9184	15.8651	16.9147	16.4808	16.5715	16.9357	16.4712
1363.67	7333.14	16.4212	16.7349	17.6086	16.9871	17.5676	17.7872	13.7807	15.2403	17.7907	18.0054	17.7523	18.3094	19.2462	18.336	16.6452	18.2793	17.5274	16.7702	16.5965	15.524	15.6913	16.7544	16.9429	15.8396	15.7127	15.1217	15.4836	15.5682	15.755	16.9299	15.8798	16.4425	16.0782	16.8684	16.5478	16.7744	16.8212	16.2837	17.1545	16.8866	17.4126	15.8522	15.797	16.836	16.4041	16.4708	16.8585	16.4062
1365.6	7322.78	16.4458	16.7774	17.6448	17.0373	17.5933	17.8296	13.7815	15.2815	17.8367	18.0257	17.7886	18.3608	19.2803	18.3628	16.7144	18.3362	17.5485	16.7307	16.6318	15.543	15.7599	16.7366	16.9611	15.863	15.7375	15.1499	15.4903	15.6098	15.7665	16.9656	15.9317	16.4711	16.1176	16.88	16.5645	16.8162	16.8414	16.3296	17.1652	16.9085	17.4471	15.8633	15.8115	16.8488	16.4083	16.4753	16.9025	16.4324
1367.53	7312.45	16.4524	16.7924	17.6865	17.0358	17.6003	17.8714	13.7933	15.3062	17.866	18.0573	17.806	18.3831	19.3021	18.3702	16.7301	18.3651	17.5727	16.7416	16.653	15.5507	15.7714	16.7046	16.9736	15.9079	15.7465	15.1587	15.4882	15.6159	15.7594	16.9662	15.9436	16.4563	16.1226	16.8787	16.5687	16.8136	16.8354	16.3335	17.1746	16.9094	17.4631	15.8635	15.811	16.8565	16.3902	16.487	16.9053	16.4434
1369.46	7302.15	16.4304	16.7627	17.6394	17.0037	17.5715	17.873	13.7754	15.2448	17.8348	18.0494	17.777	18.3357	19.2717	18.3543	16.6918	18.3195	17.5274	16.7251	16.6355	15.5168	15.7314	16.6731	16.9412	15.8973	15.7185	15.1254	15.4575	15.5718	15.7323	16.9314	15.9118	16.4308	16.0863	16.8543	16.5554	16.7828	16.8022	16.2988	17.1575	16.8798	17.4156	15.8535	15.7633	16.8272	16.3475	16.4707	16.8681	16.4185
1371.39	7291.88	16.4718	16.8335	17.6245	17.0477	17.6164	17.8928	13.8121	15.2955	17.8986	18.1066	17.8388	18.3512	19.3266	18.4092	16.7685	18.3977	17.5667	16.7247	16.696	15.559	15.846	16.7292	16.996	15.9182	15.7309	15.169	15.4975	15.6032	15.7818	16.9813	15.975	16.4824	16.1408	16.9127	16.5932	16.8162	16.8441	16.3489	17.1994	16.9092	17.4591	15.9026	15.7929	16.8569	16.4133	16.5305	16.908	16.4424
1373.32	7281.64	16.4164	16.7745	17.5377	16.9671	17.5658	17.7916	13.7733	15.2784	17.8368	18.0417	17.7841	18.2845	19.2814	18.3476	16.6968	18.3543	17.5329	16.7254	16.6252	15.5241	15.811	16.7293	16.9699	15.8514	15.6671	15.1176	15.4695	15.5363	15.7356	16.9244	15.907	16.4152	16.093	16.8616	16.536	16.7569	16.7809	16.2719	17.1602	16.8315	17.4032	15.8311	15.7683	16.8095	16.3679	16.4796	16.8379	16.3738
1375.25	7271.43	16.3538	16.6717	17.4966	16.8952	17.4942	17.724	13.7129	15.1984	17.7341	17.9372	17.6813	18.2423	19.2026	18.2708	16.5906	18.2237	17.4566	16.7135	16.538	15.4415	15.6891	16.6781	16.8913	15.7899	15.6187	15.0348	15.3977	15.4656	15.6665	16.8458	15.8098	16.3347	16.018	16.7678	16.4712	16.6728	16.7031	16.1838	17.0888	16.7663	17.3251	15.7497	15.7114	16.7499	16.2816	16.396	16.7518	16.2974
1377.17	7261.24	16.3475	16.6767	17.53	16.9134	17.4909	17.7312	13.6876	15.1905	17.7455	17.9227	17.6768	18.256	19.1967	18.2758	16.6135	18.2364	17.4623	16.6675	16.5406	15.4212	15.7059	16.6231	16.8786	15.7696	15.6061	15.0417	15.3752	15.487	15.6591	16.8443	15.8222	16.3342	16.0164	16.7519	16.4557	16.6812	16.7065	16.1977	17.0763	16.7709	17.3309	15.783	15.682	16.7393	16.2731	16.3857	16.7614	16.2939
1379.1	7251.09	16.336	16.6625	17.5249	16.902	17.4757	17.7391	13.6753	15.1759	17.7314	17.9202	17.6475	18.2297	19.1776	18.2618	16.5956	18.2222	17.4483	16.6571	16.5326	15.4153	15.6663	16.5889	16.8611	15.7615	15.5991	15.0303	15.3676	15.4842	15.647	16.8314	15.8084	16.3418	15.9951	16.7524	16.4484	16.6687	16.6993	16.1834	17.0615	16.7565	17.3122	15.8026	15.6676	16.7256	16.2657	16.3468	16.7484	16.2917
1381.03	7240.96	16.3085	16.6377	17.4708	16.885	17.4505	17.7346	13.6466	15.1542	17.7118	17.8955	17.6142	18.1892	19.1525	18.2353	16.5764	18.1951	17.4246	16.6215	16.5147	15.3942	15.6341	16.5537	16.8344	15.751	15.5816	15.0068	15.3529	15.4678	15.619	16.8135	15.7911	16.3461	15.9644	16.738	16.4325	16.639	16.6796	16.1638	17.0283	16.7248	17.2885	15.7674	15.6514	16.6918	16.2528	16.3071	16.7277	16.2787
1382.96	7230.86	16.3206	16.661	17.4607	16.8997	17.4678	17.7428	13.6369	15.166	17.7349	17.8944	17.6361	18.2	19.1735	18.2467	16.6025	18.219	17.4474	16.6175	16.5338	15.4092	15.6609	16.5746	16.8531	15.7673	15.5813	15.0164	15.3639	15.4625	15.6291	16.8288	15.8057	16.3542	15.9759	16.7524	16.4361	16.6461	16.6989	16.1802	17.0224	16.7335	17.3033	15.756	15.6719	16.6975	16.2838	16.323	16.7359	16.28
1384.89	7220.79	16.3367	16.7067	17.5046	16.9	17.4856	17.7427	13.669	15.2032	17.7742	17.9398	17.6754	18.2298	19.2158	18.2722	16.6483	18.2811	17.4704	16.6085	16.5712	15.4419	15.7208	16.6046	16.8885	15.7898	15.5889	15.0383	15.3723	15.4641	15.6484	16.8484	15.8351	16.3443	16.0067	16.7589	16.4433	16.6504	16.7173	16.2019	17.041	16.7391	17.3233	15.7719	15.6946	16.7152	16.299	16.354	16.7411	16.2797
1386.82	7210.75	16.2576	16.6038	17.4172	16.7875	17.4049	17.6406	13.6138	15.1084	17.6296	17.8498	17.5795	18.1431	19.1345	18.1879	16.5272	18.1674	17.3777	16.6263	16.4877	15.3757	15.5748	16.5798	16.8269	15.7265	15.4964	14.9504	15.3088	15.3553	15.5707	16.7572	15.7308	16.2401	15.92	16.6753	16.3692	16.553	16.6288	16.0932	16.9944	16.668	17.2371	15.6782	15.6187	16.6457	16.2139	16.3054	16.6389	16.1987
1388.75	7200.73	16.1985	16.5125	17.3237	16.736	17.3361	17.5881	13.5251	15.0333	17.5196	17.7347	17.4928	18.0438	19.0435	18.1131	16.4389	18.0446	17.2935	16.5753	16.4091	15.3082	15.4794	16.5056	16.7423	15.6522	15.4401	14.8693	15.2341	15.3081	15.5006	16.6852	15.6531	16.182	15.8426	16.5967	16.3002	16.4823	16.5552	16.0271	16.9333	16.6145	17.1592	15.6065	15.5235	16.5736	16.1465	16.2219	16.5758	16.1403
1390.68	7190.75	16.2487	16.5879	17.4012	16.8032	17.3858	17.6378	13.5722	15.0927	17.6159	17.8126	17.5625	18.1016	19.107	18.1694	16.5297	18.1304	17.3536	16.5537	16.4734	15.344	15.6111	16.5097	16.7893	15.6682	15.4876	14.9235	15.2665	15.3749	15.5475	16.7425	15.7385	16.2529	15.9025	16.6564	16.3432	16.5364	16.601	16.0952	16.9771	16.6703	17.2166	15.6861	15.547	16.6138	16.1969	16.2456	16.6403	16.1813
1392.61	7180.79	16.2612	16.6436	17.4622	16.8111	17.4111	17.616	13.612	15.122	17.6897	17.8523	17.6107	18.1502	19.1526	18.2006	16.5868	18.2163	17.4116	16.539	16.5027	15.3528	15.7047	16.5386	16.8359	15.6791	15.4988	14.957	15.2947	15.3885	15.5673	16.7718	15.7834	16.2704	15.9322	16.71	16.3571	16.5484	16.6247	16.1249	17.004	16.694	17.2478	15.7235	15.5737	16.6356	16.2111	16.2849	16.6561	16.1767
1394.53	7170.85	16.2042	16.576	17.4751	16.6987	17.3509	17.5262	13.557	15.0532	17.614	17.7743	17.5352	18.0906	19.0934	18.1398	16.4813	18.1455	17.3741	16.5712	16.4343	15.3052	15.5795	16.5273	16.799	15.6431	15.4367	14.8777	15.2622	15.304	15.5049	16.6938	15.6836	16.1925	15.8551	16.6726	16.3137	16.4657	16.5523	16.0211	16.9429	16.6011	17.1641	15.638	15.558	16.5854	16.1259	16.248	16.5436	16.0892
1396.46	7160.95	16.158	16.5151	17.4339	16.645	17.2931	17.5087	13.4904	14.9615	17.562	17.7276	17.4572	18.0168	19.0285	18.0832	16.4162	18.0543	17.2926	16.526	16.3894	15.2535	15.5147	16.4624	16.7307	15.5935	15.3832	14.812	15.2132	15.2633	15.4611	16.6374	15.6242	16.1483	15.7996	16.5999	16.2684	16.4054	16.4927	15.9634	16.8784	16.544	17.107	15.58	15.5115	16.5326	16.0657	16.1687	16.4834	16.05
1398.39	7151.07	16.0941	16.4333	17.3112	16.5964	17.2273	17.4588	13.4262	14.8712	17.471	17.6495	17.3798	17.9414	18.9547	18.0142	16.3496	17.9779	17.2305	16.5024	16.3214	15.2001	15.4599	16.409	16.6729	15.5287	15.3239	14.7571	15.161	15.1966	15.4131	16.581	15.5593	16.0811	15.7327	16.5194	16.1983	16.3464	16.4465	15.9084	16.8305	16.517	17.0553	15.5301	15.4609	16.4713	16.0207	16.0698	16.4335	16.0048
1400.32	7141.22	16.0404	16.3509	17.1943	16.5595	17.1667	17.4027	13.3732	14.8024	17.3519	17.5576	17.2955	17.8858	18.8759	17.9465	16.2771	17.8731	17.1464	16.4422	16.2663	15.1515	15.355	16.3328	16.594	15.4709	15.2807	14.688	15.083	15.1349	15.345	16.5187	15.4903	16.0252	15.6679	16.4328	16.1339	16.304	16.3851	15.8385	16.7673	16.4722	16.9691	15.4594	15.3914	16.3983	15.9687	15.9979	16.3765	15.9465
1402.25	7131.4	16.0952	16.4394	17.2734	16.6338	17.2295	17.4907	13.4262	14.8976	17.4548	17.6627	17.3764	17.9497	18.9522	18.0147	16.3848	17.9749	17.2018	16.405	16.3398	15.2036	15.4546	16.3486	16.6424	15.537	15.3283	14.7522	15.1107	15.2164	15.3844	16.5782	15.5741	16.0755	15.734	16.4871	16.1668	16.3667	16.4309	15.9174	16.7992	16.5208	17.0401	15.4919	15.4343	16.4384	16.0142	16.062	16.4473	15.9924
1404.18	7121.6	16.0207	16.3615	17.1675	16.546	17.1656	17.4395	13.3507	14.8642	17.3814	17.597	17.3026	17.8664	18.8712	17.9406	16.2989	17.905	17.1393	16.379	16.2775	15.1345	15.3816	16.2876	16.583	15.469	15.2384	14.6833	15.0528	15.1375	15.3237	16.5038	15.4919	15.9896	15.6662	16.4149	16.0996	16.285	16.3608	15.8349	16.7321	16.43	16.9832	15.4125	15.371	16.371	15.9293	16.0027	16.3733	15.9292
1406.11	7111.83	15.9648	16.2842	17.0401	16.4883	17.1017	17.3848	13.2899	14.8007	17.291	17.488	17.2229	17.7979	18.7909	17.8782	16.2202	17.8057	17.0887	16.3542	16.2115	15.0742	15.3168	16.2599	16.5154	15.3864	15.1688	14.6116	14.9943	15.05	15.2663	16.4417	15.4246	15.9422	15.6027	16.3548	16.0558	16.2379	16.3061	15.7679	16.6741	16.3589	16.9129	15.3756	15.3096	16.3084	15.8741	15.9391	16.3101	15.8818
1408.04	7102.09	15.9593	16.2879	17.0437	16.4935	17.0866	17.3461	13.2952	14.7978	17.3039	17.4933	17.225	17.7891	18.7955	17.8709	16.2372	17.8164	17.0874	16.3027	16.203	15.0598	15.3389	16.2578	16.5051	15.3687	15.1575	14.6103	14.9793	15.0534	15.2489	16.4383	15.4422	15.9477	15.5991	16.3364	16.0426	16.2436	16.3033	15.7758	16.6595	16.3582	16.9055	15.3743	15.2801	16.2935	15.8795	15.9475	16.3123	15.8766
1409.96	7092.38	15.9378	16.2713	17.0606	16.4656	17.0629	17.283	13.2819	14.7679	17.2955	17.4896	17.2051	17.7714	18.7847	17.8505	16.2201	17.8072	17.0677	16.2891	16.1829	15.0368	15.3117	16.2341	16.4992	15.356	15.1435	14.5897	14.9613	15.0577	15.2327	16.4172	15.4291	15.9131	15.5805	16.3159	16.0198	16.2036	16.2825	15.7484	16.6387	16.3391	16.8813	15.3516	15.2498	16.2762	15.8686	15.9332	16.2899	15.8476
1411.89	7082.69	15.8809	16.2062	17.0375	16.4085	17.0068	17.2182	13.2278	14.7106	17.2291	17.4273	17.1276	17.727	18.7268	17.7955	16.1504	17.7359	17.0192	16.2459	16.1239	14.9774	15.2463	16.1739	16.4419	15.304	15.0983	14.5286	14.9092	14.9979	15.1827	16.3565	15.369	15.8632	15.518	16.2563	15.966	16.1386	16.232	15.6905	16.5943	16.2778	16.8253	15.3295	15.1947	16.2208	15.8209	15.8646	16.2343	15.7876
1413.82	7073.03	15.9013	16.2473	17.0975	16.4261	17.0265	17.246	13.2526	14.753	17.2698	17.4712	17.1522	17.7613	18.7718	17.8204	16.1932	17.778	17.0422	16.2157	16.1515	14.9924	15.2877	16.1882	16.4633	15.3281	15.1137	14.5443	14.9283	15.0044	15.1894	16.3763	15.401	15.9032	15.5384	16.2966	15.9784	16.1552	16.253	15.714	16.5991	16.2809	16.8507	15.3654	15.2275	16.2363	15.8313	15.893	16.2421	15.7943
1415.75	7063.39	15.9125	16.3068	17.1523	16.4284	17.0496	17.2437	13.2722	14.7958	17.3472	17.5255	17.2027	17.7794	18.8236	17.8494	16.2534	17.8621	17.0591	16.1898	16.1914	15.0148	15.3417	16.2109	16.514	15.3614	15.1316	14.5692	14.9649	15.0442	15.2077	16.406	15.4433	15.9228	15.5722	16.3458	16.0046	16.1518	16.2764	15.7385	16.618	16.3116	16.8854	15.3908	15.2695	16.2631	15.8366	15.9137	16.25	15.8036
1417.68	7053.78	15.8291	16.2232	17.1411	16.3177	16.9793	17.1418	13.1979	14.7096	17.2766	17.4241	17.1209	17.6664	18.7525	17.7779	16.1568	17.7944	16.9935	16.2131	16.1152	14.952	15.2386	16.1608	16.4717	15.3241	15.0627	14.483	14.9282	14.9715	15.1599	16.3325	15.3428	15.8202	15.4981	16.2866	15.9337	16.0501	16.195	15.6385	16.5878	16.2259	16.8166	15.3249	15.2248	16.2181	15.785	15.8319	16.1503	15.7254
1419.61	7044.2	15.6595	15.9655	16.8863	16.1214	16.7862	17.0094	13.0389	14.4923	16.9813	17.2049	16.8859	17.4736	18.5153	17.5747	15.8815	17.4839	16.7831	16.1779	15.9331	14.7634	14.9522	16.0146	16.2648	15.1334	14.8965	14.2664	14.7507	14.7352	14.9827	16.1325	15.0987	15.6144	15.2928	16.0642	15.7603	15.8731	15.9833	15.4082	16.3777	16.0475	16.5931	15.101	15.0391	16.0407	15.6205	15.6402	15.946	15.5537
1421.54	7034.64	15.7256	16.0655	16.8773	16.2184	16.8513	17.12	13.0944	14.5703	17.0989	17.3057	16.9878	17.5608	18.5863	17.6501	16.0074	17.5853	16.851	16.1174	16.0168	14.823	15.1077	16.0355	16.3129	15.1515	14.9324	14.343	14.7692	14.7996	15.0235	16.2047	15.2084	15.6785	15.3688	16.1097	15.8129	15.9524	16.0439	15.5137	16.4161	16.1311	16.6813	15.1443	15.0921	16.075	15.696	15.7017	16.0354	15.6085
1423.47	7025.11	15.6501	15.9908	16.7646	16.1527	16.7845	17.0591	13.024	14.487	17.0342	17.228	16.9225	17.485	18.515	17.5808	15.9372	17.5337	16.7979	16.0663	15.944	14.7799	15.0455	15.9699	16.2498	15.0881	14.8664	14.2955	14.7006	14.7469	14.9642	16.137	15.1525	15.6153	15.299	16.0456	15.7487	15.9009	15.9847	15.4589	16.3499	16.0773	16.6242	15.0705	15.0466	16.0131	15.6352	15.6734	15.987	15.5567
1425.4	7015.6	15.6191	15.9438	16.6999	16.1286	16.743	16.9807	12.9931	14.4289	16.977	17.1676	16.8714	17.4418	18.4676	17.5423	15.8934	17.4671	16.7571	16.0296	15.9047	14.7441	15.0114	15.9356	16.2069	15.0527	14.8545	14.2479	14.6538	14.7355	14.9336	16.1014	15.1149	15.5882	15.2654	16.0067	15.7155	15.866	15.9509	15.4246	16.325	16.046	16.5689	15.034	14.9894	15.9667	15.5912	15.6575	15.9552	15.519
1427.32	7006.12	15.6256	15.978	16.7811	16.15	16.7529	16.9746	13.0098	14.4634	17.0214	17.2078	16.9006	17.4525	18.4966	17.5599	15.9465	17.5293	16.7784	15.9719	15.919	14.7417	15.0826	15.9185	16.2264	15.0557	14.8401	14.2714	14.6574	14.7574	14.9348	16.1196	15.1577	15.5999	15.2909	16.0266	15.7132	15.8787	15.9745	15.4567	16.3659	16.0502	16.5992	15.0669	14.9805	15.9744	15.5937	15.6598	15.98	15.5126
1429.25	6996.66	15.5672	15.9069	16.7975	16.0663	16.6884	16.9069	12.9676	14.4049	16.9458	17.136	16.8302	17.4011	18.4426	17.5019	15.8659	17.4605	16.7251	15.9627	15.8634	14.7008	15.0008	15.8774	16.1774	15.0032	14.7749	14.2029	14.6144	14.6796	14.877	16.052	15.0831	15.5407	15.2274	15.9725	15.6564	15.8115	15.9197	15.372	16.3188	15.9923	16.5319	15.0306	14.9265	15.9253	15.5378	15.5805	15.8995	15.442
1431.18	6987.23	15.4968	15.8228	16.7091	15.9885	16.6167	16.8436	12.904	14.3283	16.8568	17.0551	16.7345	17.3393	18.3502	17.4208	15.778	17.3563	16.6432	15.9096	15.7955	14.6337	14.8831	15.8102	16.0985	14.9406	14.7179	14.1218	14.5498	14.6002	14.8071	15.9734	14.9985	15.4806	15.1529	15.8999	15.5937	15.7402	15.8478	15.2885	16.2141	15.9304	16.4457	14.9594	14.8584	15.8465	15.455	15.5071	15.8202	15.3727
1433.11	6977.83	15.5333	15.8969	16.7479	16.0351	16.6612	16.8919	12.9321	14.3788	16.932	17.1331	16.7908	17.3687	18.3994	17.4672	15.8616	17.4297	16.6965	15.8621	15.8471	14.658	14.9795	15.8345	16.138	14.9707	14.754	14.1636	14.5853	14.6465	14.8359	16.0193	15.0668	15.5356	15.2027	15.9422	15.6236	15.7688	15.8951	15.3535	16.212	15.9546	16.5012	14.9929	14.9083	15.8748	15.4781	15.5813	15.8654	15.411
1435.04	6968.45	15.4603	15.8563	16.7027	15.9677	16.6105	16.7838	12.8781	14.3816	16.8908	17.0864	16.7501	17.2841	18.3595	17.4112	15.8284	17.4336	16.6627	15.8141	15.784	14.6084	14.9907	15.8165	16.1187	14.9219	14.665	14.1248	14.5532	14.6092	14.7811	15.9736	15.025	15.4576	15.1486	15.9144	15.5589	15.7192	15.8542	15.3058	16.1597	15.892	16.4733	14.9401	14.8891	15.8207	15.4346	15.5716	15.8136	15.3565
1436.97	6959.1	15.2682	15.5771	16.4941	15.7384	16.3994	16.5841	12.6946	14.1391	16.5756	16.7915	16.4768	17.0724	18.0946	17.1873	15.5154	17.1034	16.433	15.8077	15.5684	14.4095	14.6662	15.6814	15.9054	14.7478	14.4875	13.8909	14.3649	14.3887	14.6043	15.7499	14.7427	15.2084	14.9193	15.6814	15.3604	15.5051	15.6199	15.0337	15.9911	15.6859	16.2252	14.7094	14.6916	15.6361	15.2469	15.3282	15.5722	15.151
1438.9	6949.77	15.2595	15.5634	16.4493	15.759	16.3717	16.6177	12.6556	14.0886	16.5679	16.7748	16.4581	17.0711	18.0615	17.1682	15.5189	17.0648	16.4129	15.7004	15.5792	14.3758	14.6487	15.6016	15.8492	14.6988	14.4937	13.8751	14.301	14.3649	14.5798	15.7357	14.7507	15.2152	14.9031	15.6376	15.3255	15.5047	15.5749	15.0361	15.9781	15.6582	16.1977	14.6742	14.6347	15.5994	15.201	15.2729	15.5703	15.1271
1440.83	6940.47	15.2577	15.5786	16.4004	15.7825	16.3742	16.6244	12.6478	14.1003	16.5902	16.8084	16.4783	17.076	18.0708	17.1704	15.5521	17.1029	16.4209	15.6393	15.5831	14.3768	14.6896	15.5648	15.8474	14.6898	14.4884	13.8912	14.2834	14.3677	14.5675	15.7436	14.785	15.2281	14.9143	15.635	15.3279	15.5218	15.5789	15.0703	15.96	15.6644	16.2224	14.6854	14.6284	15.5872	15.1868	15.2771	15.5919	15.1355
1442.75	6931.19	15.2056	15.5313	16.3276	15.7299	16.3201	16.5544	12.6058	14.0546	16.5403	16.7556	16.4263	17.0251	18.0173	17.119	15.5062	17.0599	16.3718	15.5728	15.5275	14.3346	14.6616	15.503	15.8001	14.6378	14.4347	13.8399	14.2353	14.3102	14.5136	15.6919	14.743	15.1847	14.8654	15.5909	15.2821	15.4768	15.5285	15.024	15.8997	15.6189	16.1735	14.6465	14.5692	15.5319	15.1342	15.2207	15.5402	15.0903
1444.68	6921.93	15.2008	15.5506	16.3912	15.72	16.3156	16.5372	12.6107	14.0515	16.5687	16.7684	16.4249	17.0258	18.0219	17.121	15.5231	17.0808	16.3686	15.5347	15.5347	14.3359	14.6897	15.4883	15.8061	14.6342	14.4369	13.8365	14.2363	14.3117	14.5116	15.6921	14.7522	15.1837	14.8667	15.5876	15.2753	15.4603	15.5224	15.0215	15.8875	15.6215	16.1656	14.612	14.5594	15.5277	15.1258	15.2284	15.533	15.0827
1446.61	6912.7	15.1176	15.472	16.3822	15.6196	16.2311	16.4295	12.5481	13.9737	16.5009	16.694	16.3357	16.9421	17.9495	17.0419	15.4333	17.0148	16.2931	15.4886	15.4496	14.2647	14.6068	15.4247	15.7419	14.5576	14.343	13.7615	14.175	14.2332	14.4332	15.6141	14.6657	15.0814	14.7845	15.5183	15.1934	15.3671	15.4486	14.9337	15.8213	15.5287	16.0915	14.5258	14.4934	15.453	15.0559	15.1621	15.4434	14.9944
1448.54	6903.5	15.0259	15.3458	16.2673	15.5037	16.1249	16.3307	12.4624	13.8751	16.3482	16.5398	16.2075	16.8389	17.8215	16.9328	15.2936	16.8572	16.2004	15.4505	15.3444	14.171	14.4546	15.3564	15.6331	14.4527	14.2388	13.6434	14.0844	14.1136	14.338	15.5018	14.5335	14.9781	14.6736	15.4122	15.0945	15.262	15.3478	14.8053	15.7313	15.4256	15.9714	14.4492	14.3867	15.3502	14.969	15.0463	15.3264	14.8832
1450.47	6894.32	15.0037	15.3346	16.2276	15.488	16.0998	16.3218	12.4436	13.858	16.331	16.5396	16.1987	16.8218	17.7954	16.9077	15.2975	16.8483	16.1878	15.3666	15.334	14.1337	14.465	15.303	15.6037	14.4343	14.2118	13.621	14.0494	14.102	14.3157	15.4782	14.5335	14.9725	14.6544	15.3931	15.0707	15.2491	15.3255	14.794	15.7021	15.3973	15.9475	14.4166	14.353	15.3135	14.9474	15.0213	15.312	14.8535
1452.4	6885.16	15.0191	15.3768	16.2754	15.4944	16.1166	16.3105	12.4671	13.8762	16.3847	16.6036	16.2364	16.8333	17.8318	16.9268	15.3383	16.905	16.2161	15.3376	15.3624	14.1321	14.5285	15.2888	15.6345	14.456	14.228	13.6387	14.062	14.127	14.3317	15.4991	14.5681	14.9749	14.6768	15.4163	15.0816	15.2402	15.3343	14.8136	15.7112	15.4145	15.9697	14.4079	14.3819	15.3297	14.9588	15.0328	15.3179	14.8579
1454.33	6876.03	15.0287	15.4636	16.4042	15.5135	16.1498	16.2765	12.5222	13.9643	16.516	16.6784	16.3127	16.833	17.9043	16.9742	15.4317	17.0412	16.2768	15.277	15.3916	14.1477	14.6672	15.2824	15.7106	14.4884	14.2081	13.6849	14.0947	14.1902	14.3612	15.5521	14.6384	14.9667	14.728	15.4681	15.0872	15.2404	15.3554	14.8572	15.7549	15.4256	16.0199	14.4706	14.4562	15.3721	14.9972	15.0684	15.3472	14.8715
1456.26	6866.92	14.8133	15.2562	16.4576	15.2478	15.9739	16.0384	12.3923	13.7766	16.3421	16.5153	16.1138	16.5936	17.7495	16.7838	15.1954	16.8954	16.1749	15.3144	15.1838	13.9548	14.4783	15.2111	15.6228	14.3288	13.882	13.4946	13.9897	13.985	14.2267	15.3746	14.3955	14.7018	14.535	15.328	14.9026	15.0234	15.1777	14.6044	15.6305	15.2246	15.8445	14.3043	14.4212	15.2522	14.8502	14.9984	15.1073	14.6727
1458.18	6857.84	14.5043	14.7844	15.9144	14.9165	15.633	15.8202	12.0215	13.3472	15.8203	16.0289	15.6757	16.2737	17.3158	16.4111	14.7102	16.3177	15.7322	15.2128	14.8701	13.6677	13.9388	15.0058	15.2132	13.9986	13.6661	13.1317	13.6766	13.6089	13.9214	15.0108	13.9751	14.4127	14.185	14.9565	14.6163	14.7241	14.8581	14.234	15.2861	14.9533	15.4702	13.9629	14.0564	14.9336	14.4946	14.6607	14.7625	14.393
1460.11	6848.78	14.6148	14.9078	15.8377	15.0683	15.7028	15.9229	12.0833	13.4602	15.9146	16.1169	15.7827	16.4017	17.3849	16.5003	14.8571	16.405	15.7735	15.0987	14.9658	13.7694	14.0493	14.9948	15.2348	14.0458	13.8234	13.2221	13.678	13.7138	13.9478	15.0871	14.119	14.5495	14.2643	14.9764	14.6849	14.8268	14.9236	14.3664	15.2969	15.0283	15.541	14.0335	14.0114	14.9497	14.5603	14.6473	14.8796	14.4644
1462.04	6839.75	14.6583	15.0098	15.8776	15.1591	15.7544	15.9633	12.1332	13.5715	16.0243	16.229	15.8693	16.4621	17.458	16.5643	14.9926	16.5494	15.8447	14.9888	15.017	13.8193	14.1718	14.9565	15.2902	14.0954	13.8469	13.3028	13.6908	13.7983	13.9754	15.1527	14.2379	14.6168	14.3292	15.0144	14.7191	14.9004	14.9783	14.4698	15.3467	15.0786	15.6149	14.0905	14.0471	14.9731	14.6267	14.6705	14.9769	14.5085
1463.97	6830.73	14.554	14.9047	15.8301	15.0342	15.6536	15.8731	12.0581	13.5063	15.9098	16.1258	15.7578	16.3477	17.3599	16.4597	14.8754	16.4683	15.757	14.9567	14.9122	13.7412	14.056	14.879	15.2165	14.0271	13.7296	13.207	13.6106	13.6776	13.8886	15.0474	14.1308	14.5056	14.2327	14.9192	14.617	14.7964	14.886	14.3519	15.2715	14.9778	15.5311	13.9742	13.9782	14.8874	14.5675	14.5601	14.869	14.4092
1465.9	6821.75	14.4063	14.7107	15.6268	14.8726	15.4945	15.7422	11.9084	13.296	15.6848	15.9196	15.5637	16.1866	17.1549	16.2872	14.6679	16.2248	15.5885	14.8682	14.7562	13.5846	13.8497	14.7618	15.0344	13.8871	13.6158	13.0321	13.4745	13.503	13.7452	14.8845	13.9365	14.3541	14.0718	14.757	14.4731	14.6315	14.7305	14.1751	15.0896	14.8191	15.3554	13.7989	13.8121	14.7321	14.4	14.408	14.6945	14.276
1467.83	6812.78	14.4393	14.7703	15.6245	14.9292	15.5274	15.7422	11.9333	13.3274	15.742	15.9686	15.6149	16.2335	17.1892	16.3242	14.7461	16.289	15.6456	14.7941	14.798	13.5889	13.937	14.7521	15.0532	13.9014	13.6574	13.0726	13.4848	13.575	13.7576	14.9273	13.9951	14.398	14.1082	14.7859	14.4988	14.6715	14.7542	14.2354	15.1114	14.8552	15.3897	13.8404	13.8114	14.7474	14.4101	14.462	14.7429	14.3027
1469.76	6803.84	14.4547	14.8493	15.7107	14.9556	15.56	15.7319	11.9733	13.3969	15.8561	16.0478	15.6776	16.2642	17.259	16.3702	14.851	16.4254	15.7059	14.7164	14.8283	13.6095	14.0626	14.7345	15.114	13.9043	13.6642	13.1265	13.5059	13.6336	13.7869	14.9776	14.0698	14.4241	14.1541	14.8432	14.5148	14.6965	14.7815	14.3004	15.1447	14.8694	15.4456	13.8888	13.8347	14.7746	14.44	14.5232	14.7878	14.3164
1471.69	6794.92	14.3218	14.734	15.7493	14.7473	15.4373	15.5814	11.886	13.2931	15.7869	15.9464	15.5422	16.1166	17.1618	16.2525	14.7044	16.3415	15.6164	14.7199	14.6863	13.4978	13.9521	14.6294	15.0566	13.818	13.4987	12.9972	13.4321	13.4844	13.7002	14.8499	13.9132	14.2563	14.0239	14.7726	14.3899	14.5389	14.6496	14.1308	15.0304	14.6819	15.3337	13.7676	13.757	14.6958	14.3626	14.4124	14.6157	14.1651
1473.62	6786.03	14.0974	14.4254	15.4349	14.4872	15.187	15.3742	11.6337	12.9876	15.4744	15.6739	15.2496	15.8436	16.8617	15.9858	14.3577	15.948	15.3132	14.6327	14.4486	13.2677	13.5894	14.426	14.7826	13.6052	13.2847	12.7336	13.2322	13.2137	13.4832	14.5921	13.6142	14.0203	13.7737	14.5268	14.1616	14.3046	14.4112	13.8451	14.7877	14.4612	15.0916	13.5486	13.575	14.4789	14.1169	14.1506	14.366	13.9592
1475.54	6777.16	14.0481	14.3552	15.2721	14.4739	15.1209	15.3455	11.5494	12.9157	15.3777	15.5688	15.1899	15.7968	16.7807	15.914	14.3036	15.8721	15.2154	14.5391	14.3973	13.2201	13.5078	14.3925	14.6894	13.5279	13.2498	12.6916	13.1461	13.1783	13.4079	14.5308	13.5779	13.9903	13.7124	14.4395	14.1035	14.2727	14.3539	13.8117	14.7349	14.4196	15.0218	13.5271	13.5008	14.3987	14.0365	14.0929	14.3415	13.9239
1477.47	6768.31	13.9775	14.2811	15.1579	14.4369	15.0495	15.299	11.4765	12.8557	15.2866	15.46	15.1205	15.7295	16.7018	15.8407	14.2505	15.7935	15.1482	14.4164	14.3477	13.1475	13.4302	14.3341	14.5971	13.4438	13.2057	12.6323	13.0486	13.1	13.3256	14.4614	13.5222	13.9392	13.641	14.3469	14.0461	14.2264	14.2791	13.7584	14.6616	14.3856	14.927	13.4469	13.4043	14.3126	13.9584	14.0097	14.2872	13.8614
1479.4	6759.49	13.9585	14.294	15.1328	14.4465	15.0394	15.312	11.4626	12.8642	15.3042	15.5043	15.1322	15.7086	16.7005	15.8406	14.2862	15.8363	15.1642	14.3341	14.346	13.1448	13.4869	14.3116	14.5884	13.4323	13.1866	12.642	13.0236	13.1038	13.3028	14.4598	13.5449	13.9382	13.6398	14.3182	14.029	14.2211	14.2757	13.7665	14.6585	14.3796	14.9368	13.4391	13.3742	14.2883	13.9545	13.9677	14.298	13.847
1481.33	6750.69	13.8288	14.1549	14.9657	14.3149	14.9087	15.1836	11.369	12.7344	15.139	15.3863	14.9959	15.5765	16.5537	15.6997	14.1434	15.6965	15.0371	14.2405	14.2176	13.0288	13.3591	14.1853	14.4601	13.3115	13.061	12.5243	12.9094	12.9798	13.181	14.3297	13.411	13.8119	13.5097	14.188	13.9017	14.0851	14.1538	13.6308	14.5271	14.2606	14.8113	13.3071	13.2481	14.1638	13.8375	13.8391	14.1743	13.7258
1483.26	6741.91	13.7973	14.1315	14.9093	14.2889	14.8697	15.1258	11.3433	12.7057	15.1001	15.3437	14.963	15.5471	16.5165	15.6614	14.1254	15.6667	15.0091	14.1548	14.1859	12.9903	13.3633	14.1147	14.4209	13.2811	13.02	12.4912	12.8606	12.9473	13.1436	14.2976	13.3865	13.7767	13.4817	14.1569	13.8619	14.0459	14.1129	13.6105	14.4684	14.219	14.7724	13.2619	13.2038	14.1168	13.7726	13.8186	14.1376	13.678
1485.19	6733.15	13.7657	14.1339	14.9453	14.2455	14.834	15.0744	11.3172	12.7001	15.1205	15.3529	14.9535	15.5103	16.513	15.6384	14.1266	15.7055	14.9925	14.0694	14.1563	12.9651	13.3903	14.0516	14.412	13.2673	12.9674	12.4735	12.817	12.9224	13.1128	14.2682	13.388	13.7326	13.4616	14.1321	13.8143	14.0116	14.0809	13.593	14.4326	14.1869	14.7502	13.2303	13.1775	14.0861	13.7279	13.8111	14.0997	13.6266
1487.12	6724.42	13.6931	14.0993	14.9656	14.1337	14.7758	14.9733	11.2925	12.6564	15.1239	15.3223	14.9147	15.4343	16.485	15.5776	14.0795	15.6892	14.9115	14.0307	14.1045	12.8983	13.3454	13.9998	14.3902	13.2399	12.9042	12.4091	12.7772	12.8518	13.0607	14.2061	13.333	13.6449	13.4092	14.0816	13.7471	13.9256	14.0157	13.5165	14.4005	14.1109	14.6865	13.1617	13.1362	14.0371	13.6535	13.776	14.0023	13.5459
1489.05	6715.71	13.4043	13.7799	14.6675	13.8283	14.5178	14.6955	11.0836	12.395	14.8057	14.9909	14.6177	15.1433	16.1804	15.2933	13.7556	15.3572	14.5986	13.9361	13.827	12.6129	12.9982	13.8009	14.1356	12.996	12.6691	12.1506	12.5885	12.5753	12.8305	13.9361	13.0227	13.381	13.1335	13.8489	13.5076	13.6638	13.7523	13.2392	14.1844	13.8434	14.4347	12.9031	12.9189	13.8026	13.4525	13.5326	13.7346	13.3091
1490.97	6707.02	13.2751	13.5734	14.4392	13.6925	14.3331	14.5803	10.9066	12.2016	14.5425	14.781	14.4026	14.9825	15.946	15.1071	13.529	15.0622	14.4295	13.8251	13.6618	12.4624	12.7517	13.65	13.9139	12.8093	12.554	11.9699	12.4213	12.3982	12.6675	13.7546	12.8154	13.2446	12.9491	13.6623	13.352	13.4937	13.5736	13.0613	13.9698	13.7045	14.2237	12.7439	12.7352	13.6298	13.3114	13.327	13.5707	13.154
1492.9	6698.36	13.3085	13.6493	14.4584	13.7811	14.3623	14.6149	10.9159	12.258	14.6264	14.8519	14.4616	15.0181	15.9913	15.1392	13.6297	15.1699	14.4865	13.6695	13.704	12.4915	12.8672	13.6214	13.9288	12.7939	12.5787	12.0294	12.4039	12.4622	12.6715	13.7996	12.9013	13.2806	12.9916	13.6696	13.3624	13.539	13.6049	13.125	13.9698	13.7322	14.2702	12.8066	12.7246	13.6261	13.3001	13.335	13.6334	13.1803
1494.83	6689.71	13.2818	13.6664	14.5063	13.7508	14.3523	14.5613	10.9103	12.311	14.6548	14.8915	14.4669	14.9915	16.0044	15.123	13.6509	15.2578	14.5038	13.6001	13.689	12.4698	12.92	13.5816	13.942	12.769	12.5173	12.0381	12.3799	12.4617	12.6387	13.7888	12.916	13.2429	12.9753	13.6733	13.3229	13.523	13.5841	13.1125	13.9573	13.693	14.2834	12.8118	12.7205	13.5999	13.2651	13.31	13.6123	13.1494
1496.76	6681.09	13.0495	13.3985	14.3301	13.4546	14.1053	14.3154	10.7071	12.0873	14.3468	14.6056	14.1888	14.727	15.7443	14.8692	13.3453	14.9562	14.2885	13.5015	13.448	12.259	12.6452	13.4066	13.7121	12.5605	12.297	11.7901	12.1719	12.1926	12.4174	13.5361	12.6395	13.0018	12.7289	13.4534	13.106	13.2649	13.3487	12.8466	13.75	13.4705	14.0304	12.5654	12.5346	13.3836	13.0542	13.0568	13.3378	12.9091
1498.69	6672.49	12.9226	13.2424	14.1038	13.3212	13.9477	14.202	10.5685	11.8954	14.1574	14.4203	14.0331	14.5781	15.5677	14.709	13.1772	14.7394	14.1314	13.3958	13.3031	12.1374	12.4464	13.2935	13.5405	12.4383	12.1701	11.642	12.0367	12.0559	12.2839	13.3822	12.4891	12.8658	12.5938	13.2858	12.9849	13.114	13.2144	12.6976	13.6032	13.3433	13.8725	12.3805	12.3698	13.2372	12.8977	12.9029	13.1899	12.7543
1500.62	6663.92	12.828	13.153	13.9238	13.2564	13.8532	14.1198	10.4774	11.7983	14.0746	14.3299	13.9439	14.4862	15.4648	14.6062	13.1059	14.6421	14.0064	13.2453	13.2089	12.0352	12.3367	13.1616	13.4256	12.3422	12.0675	11.5668	11.9357	11.9827	12.1862	13.2899	12.4106	12.7766	12.5035	13.1739	12.8782	13.0324	13.1157	12.6128	13.4821	13.2186	13.7704	12.2804	12.2438	13.1235	12.757	12.8028	13.1116	12.6625
1502.55	6655.36	12.8338	13.2093	13.9419	13.3023	13.881	14.096	10.4966	11.8468	14.1651	14.4066	13.9804	14.4953	15.5072	14.6343	13.1874	14.7431	14.0102	13.1304	13.2202	12.0421	12.4211	13.1204	13.4539	12.3384	12.0636	11.6121	11.9389	12.0138	12.2011	13.3248	12.468	12.7982	12.5334	13.2043	12.8764	13.0585	13.1267	12.6658	13.475	13.2126	13.804	12.3099	12.2525	13.123	12.777	12.8337	13.1545	12.6819
1504.48	6646.83	12.7533	13.2312	14.0677	13.2664	13.8709	13.9282	10.4683	11.8815	14.2664	14.4763	13.9715	14.4302	15.5251	14.6142	13.2464	14.8985	13.9825	12.974	13.1646	12.0084	12.5182	13.0127	13.488	12.3155	11.9502	11.63	11.9352	12.0173	12.1885	13.3312	12.4801	12.7285	12.5205	13.2323	12.8165	13.0469	13.1134	12.6753	13.4743	13.1333	13.8025	12.3028	12.2757	13.1002	12.79	12.8645	13.1376	12.6318
1506.41	6638.32	12.2024	12.7505	14.0937	12.6713	13.4757	13.3858	10.1411	11.4006	13.8812	14.0563	13.4516	13.9549	15.0874	14.141	12.7415	14.4538	13.5351	12.954	12.7531	11.5691	12.0084	12.7065	13.19	12.0227	11.373	11.1707	11.6818	11.5787	11.8486	12.9154	11.8971	12.1904	12.078	13.0145	12.3852	12.5733	12.7119	12.1569	13.2044	12.7099	13.334	11.9203	12.0301	12.7796	12.4985	12.5876	12.6025	12.1793
1508.33	6629.83	12.0037	12.3529	13.4357	12.3702	13.1097	13.3207	9.8159	11.0052	13.3235	13.5013	13.084	13.6635	14.6585	13.7945	12.2664	13.7928	13.2069	12.8038	12.4616	11.2873	11.5392	12.4904	12.7287	11.695	11.2205	10.8135	11.3321	11.2244	11.5104	12.5337	11.5467	11.9901	11.76	12.5525	12.1408	12.2403	12.3883	11.8192	12.7956	12.448	12.9696	11.5869	11.638	12.4444	12.0834	12.1639	12.2854	11.9164
1510.26	6621.36	12.1341	12.4721	13.3103	12.5144	13.1538	13.4352	9.83837	11.1191	13.3724	13.5749	13.2114	13.7568	14.7342	13.8703	12.3965	13.9228	13.2965	12.6634	12.5205	11.3696	11.6967	12.4887	12.7422	11.7155	11.3742	10.9196	11.3075	11.3177	11.5349	12.589	11.7132	12.1006	11.8243	12.5233	12.1886	12.3274	12.4264	11.922	12.7848	12.4863	13.0545	11.6554	11.6169	12.4478	12.1045	12.1301	12.3906	11.9705
1512.19	6612.92	12.0474	12.3925	13.1373	12.4649	13.0599	13.2977	9.75142	11.0539	13.28	13.5062	13.1455	13.6654	14.6453	13.7792	12.3381	13.8735	13.218	12.4746	12.4349	11.266	11.6351	12.364	12.6419	11.6087	11.2963	10.867	11.2	11.2341	11.4353	12.5057	11.6685	12.0068	11.7347	12.3833	12.084	12.2552	12.3184	11.8449	12.6724	12.394	12.968	11.5335	11.5045	12.3384	11.9761	12.0052	12.3219	11.8854
1514.12	6604.49	12.0079	12.4059	13.1354	12.4494	13.0409	13.2455	9.74491	11.0649	13.3163	13.5338	13.1498	13.6202	14.6518	13.766	12.3688	13.938	13.2262	12.3463	12.4129	11.2453	11.6777	12.2864	12.637	11.5865	11.2467	10.8755	11.1666	11.2365	11.4071	12.4908	11.6757	11.9654	11.7192	12.3826	12.0418	12.2218	12.2873	11.8381	12.6469	12.3744	12.9294	11.5003	11.4921	12.2994	11.937	11.9957	12.2954	11.8445
1516.05	6596.09	11.7357	12.1378	12.9538	12.174	12.8053	13.0342	9.54049	10.8207	13.067	13.2779	12.8855	13.324	14.3956	13.4993	12.0972	13.6955	12.9575	12.2025	12.1745	11.0426	11.432	12.0452	12.4116	11.4105	10.9571	10.6494	10.9492	10.9899	11.1907	12.2394	11.3997	11.7004	11.4746	12.1595	11.7929	11.9825	12.0599	11.5921	12.4477	12.1298	12.7009	11.2594	11.3209	12.0873	11.7209	11.7786	12.0545	11.6238
1517.98	6587.71	11.6096	12.0058	12.754	12.0345	12.6679	12.8698	9.43481	10.7216	12.9414	13.1256	12.7647	13.2101	14.2329	13.3596	11.9707	13.5044	12.781	12.0687	12.0479	10.9029	11.2917	11.8916	12.271	11.271	10.8434	10.4982	10.8061	10.8752	11.0689	12.1146	11.2674	11.5803	11.3658	12.0291	11.6749	11.8361	11.9306	11.4596	12.3266	11.9982	12.587	11.1485	11.1797	11.9509	11.5891	11.6507	11.9081	11.4831
1519.91	6579.35	11.4351	11.8936	12.6205	11.8858	12.5234	12.6302	9.341	10.6565	12.8747	13.0424	12.6476	13.0778	14.1054	13.2111	11.8819	13.467	12.6344	11.8771	11.8721	10.7385	11.176	11.7376	12.1586	11.1305	10.6371	10.4086	10.689	10.7672	10.9223	11.9874	11.1694	11.4495	11.2422	11.9171	11.5263	11.712	11.7886	11.3284	12.2045	11.8387	12.4787	11.0143	11.0306	11.8022	11.4783	11.5774	11.7804	11.3183
1521.84	6571.01	11.1382	11.5147	12.428	11.4986	12.1702	12.3317	9.07219	10.3213	12.4536	12.6259	12.2416	12.7143	13.7623	12.8681	11.4596	12.9756	12.275	11.8231	11.5479	10.456	10.7037	11.5617	11.8234	10.8811	10.3773	10.048	10.43	10.3794	10.6295	11.6303	10.7892	11.1314	10.9225	11.6214	11.2364	11.395	11.461	10.9492	11.8619	11.5652	12.085	10.6548	10.7408	11.5214	11.1784	11.2767	11.4153	11.0324
1523.76	6562.69	11.0478	11.4099	12.3116	11.4328	12.0457	12.2612	8.96492	10.2102	12.3077	12.5284	12.1307	12.5752	13.6332	12.7371	11.3662	12.8676	12.1786	11.5817	11.4417	10.3304	10.6487	11.4025	11.6734	10.7259	10.3527	9.97254	10.3031	10.2976	10.5247	11.5327	10.7274	11.0298	10.8235	11.4601	11.1288	11.2931	11.3498	10.8807	11.7016	11.4458	11.9689	10.585	10.6057	11.3841	11.0341	11.1339	11.3331	10.9517
1525.69	6554.4	10.8939	11.2505	12.1253	11.299	11.8902	12.1167	8.85174	10.0205	12.119	12.3489	11.9669	12.4427	13.4383	12.5699	11.2088	12.7208	12.0302	11.4533	11.302	10.1763	10.4829	11.2557	11.5166	10.5299	10.2447	9.85112	10.1599	10.1774	10.3789	11.3714	10.5734	10.897	10.6623	11.3054	10.9711	11.138	11.1995	10.7454	11.5541	11.297	11.8379	10.463	10.4289	11.2239	10.8743	10.9609	11.1948	10.8099
1527.62	6546.12	10.6674	10.9918	11.7963	11.0795	11.6395	11.8775	8.61475	9.78131	11.8278	12.0496	11.7011	12.2385	13.1553	12.3186	10.9472	12.4113	11.8002	11.2368	11.0604	9.96263	10.2291	11.035	11.2469	10.2542	10.0504	9.62726	9.91014	9.96307	10.1335	11.1243	10.3306	10.684	10.4189	11.0591	10.7405	10.9074	10.9684	10.5258	11.3215	11.069	11.5853	10.2326	10.1506	10.9721	10.6557	10.6906	10.9677	10.5775
1529.55	6537.87	10.6105	10.9482	11.7032	11.0401	11.5648	11.8029	8.53973	9.74478	11.7729	12.0018	11.6501	12.1669	13.0872	12.2425	10.9121	12.3784	11.7407	11.0494	10.9988	9.89499	10.2381	10.9308	11.1616	10.1613	9.99557	9.58962	9.81648	9.9129	10.0559	11.0692	10.3072	10.6037	10.3579	10.9799	10.6587	10.8484	10.8973	10.483	11.2339	10.9731	11.5057	10.1258	10.0711	10.8806	10.5828	10.6266	10.9146	10.49
1531.48	6529.63	10.4594	10.8365	11.6352	10.9049	11.4308	11.6706	8.41321	9.65216	11.681	11.8949	11.5343	11.9969	12.973	12.1014	10.8166	12.341	11.6124	10.8321	10.8727	9.75727	10.1619	10.7407	11.0376	10.0179	9.81701	9.50935	9.68875	9.80474	9.93223	10.9506	10.208	10.4449	10.2284	10.8616	10.4987	10.7285	10.7591	10.365	11.1128	10.8223	11.403	10.003	9.96926	10.747	10.4696	10.5135	10.8041	10.3498
1533.41	6521.42	10.1168	10.4452	11.263	10.5138	11.0797	11.3441	8.10813	9.29642	11.2785	11.4954	11.1439	11.6143	12.5911	11.7245	10.4041	11.8711	11.2444	10.7208	10.5423	9.42565	9.73036	10.4668	10.6831	9.69824	9.50249	9.15016	9.39145	9.46887	9.61581	10.5836	9.81619	10.0954	9.88166	10.5254	10.168	10.3758	10.3996	9.99278	10.7621	10.5057	11.0445	9.67548	9.69288	10.4322	10.1756	10.1668	10.4306	10.0426
1535.34	6513.23	9.98377	10.3173	11.0244	10.4118	10.926	11.1464	7.9641	9.17777	11.1631	11.3789	11.0143	11.4867	12.4322	11.5652	10.2871	11.7137	11.0512	10.4501	10.4011	9.27613	9.6227	10.2721	10.5163	9.55271	9.40136	9.02685	9.23213	9.33648	9.47056	10.4503	9.71143	9.98458	9.75709	10.3561	10.0319	10.2287	10.2476	9.88865	10.5778	10.3587	10.8695	9.54417	9.5522	10.2611	10.0032	10.0208	10.3025	9.90774
1537.27	6505.05	9.93787	10.3648	11.0915	10.431	10.9338	11.0796	7.96521	9.28279	11.2541	11.4632	11.0657	11.5009	12.4761	11.561	10.373	11.9196	11.0309	10.2457	10.395	9.27012	9.74017	10.1568	10.5537	9.57597	9.27103	9.1086	9.22154	9.3483	9.46155	10.4809	9.76777	9.97076	9.7588	10.3726	9.99289	10.2427	10.2432	9.9345	10.6074	10.2872	10.899	9.56747	9.56112	10.2414	9.97425	10.047	10.34	9.87025
1539.2	6496.9	9.36264	9.8935	10.8147	9.88821	10.4844	10.5276	7.56803	8.82978	10.7635	10.9607	10.5959	10.9594	12.0165	11.0702	9.90649	11.508	10.4977	9.98732	9.93625	8.83702	9.24915	9.74056	10.1774	9.19573	8.63211	8.6791	8.85632	8.91435	9.07256	10.0482	9.24116	9.43795	9.29098	10.0394	9.491	9.80172	9.76318	9.45645	10.2024	9.77606	10.4413	9.16526	9.244	9.8612	9.54852	9.73686	9.85942	9.42918
1541.12	6488.77	8.98086	9.41845	10.304	9.41715	10.0352	10.1568	7.23444	8.2711	10.2273	10.4139	10.1021	10.4645	11.5152	10.6209	9.38465	10.8013	10.0697	9.89865	9.57847	8.46931	8.73066	9.49832	9.73379	8.80748	8.37121	8.19269	8.47316	8.4855	8.69722	9.5947	8.79437	9.0684	8.90661	9.58841	9.14166	9.38016	9.37179	8.98978	9.72999	9.41946	9.98751	8.7733	8.87516	9.49518	9.16921	9.35638	9.3954	9.06343
1543.05	6480.66	8.84924	9.21695	10.0481	9.28955	9.83654	10.071	7.07258	8.15814	10.0421	10.2131	9.90657	10.2986	11.2994	10.4252	9.20217	10.5972	9.93708	9.646	9.39832	8.33231	8.62251	9.29684	9.49439	8.61094	8.32598	8.06252	8.27263	8.31788	8.493	9.39517	8.69237	8.94858	8.74554	9.32973	9.00715	9.2288	9.22613	8.83411	9.56397	9.30582	9.80546	8.56024	8.60662	9.28441	8.95067	9.07818	9.25743	8.89661
1544.98	6472.57	8.6955	9.00093	9.76751	9.12298	9.61349	9.92125	6.89122	7.96926	9.78628	9.96455	9.68357	10.1267	11.0551	10.2133	8.98215	10.3144	9.73632	9.45853	9.20667	8.12712	8.41527	9.08466	9.24161	8.39317	8.22086	7.87568	8.06656	8.14398	8.28478	9.17598	8.50447	8.7576	8.54069	9.06909	8.80611	9.04539	9.02479	8.63936	9.34798	9.12851	9.57902	8.3548	8.34452	9.04577	8.77395	8.7939	9.06954	8.69783
1546.91	6464.5	8.60004	8.91525	9.58761	9.05389	9.48403	9.7836	6.78485	7.90144	9.70816	9.87873	9.59689	10.0175	10.9368	10.0872	8.90747	10.2517	9.60787	9.14339	9.07981	7.99723	8.32566	8.89247	9.10003	8.24825	8.12974	7.80804	7.91907	8.06575	8.15481	9.06974	8.43158	8.65038	8.42954	8.94937	8.6711	8.92871	8.89708	8.55495	9.20315	8.98486	9.4651	8.24168	8.18769	8.88278	8.61983	8.6569	8.97003	8.56204
1548.84	6456.45	8.40045	8.72894	9.37359	8.8635	9.28281	9.56023	6.62753	7.75717	9.53786	9.69131	9.41693	9.79796	10.7342	9.86845	8.72842	10.1099	9.40515	8.94328	8.8835	7.81008	8.14383	8.72304	8.91566	8.04375	7.95263	7.66225	7.73916	7.88299	7.96168	8.88192	8.26193	8.46051	8.24123	8.77464	8.47073	8.74239	8.69254	8.36995	9.02171	8.78197	9.27361	8.05861	7.99437	8.68295	8.40665	8.45902	8.79283	8.35967
1550.77	6448.42	8.09434	8.40843	9.04431	8.54616	8.96121	9.19993	6.37278	7.48209	9.19374	9.31303	9.08473	9.46869	10.3835	9.52752	8.40427	9.73199	9.05936	8.67188	8.58398	7.50994	7.82822	8.42107	8.59142	7.73125	7.68185	7.36594	7.45412	7.57322	7.68448	8.57504	7.95716	8.1644	7.93893	8.48543	8.16813	8.43973	8.38205	8.06996	8.69718	8.48479	8.94195	7.76671	7.69025	8.37884	8.07063	8.15272	8.48822	8.07864
1552.7	6440.41	7.93598	8.26867	8.92845	8.38701	8.78538	9.009	6.23665	7.35446	9.05433	9.20542	8.93203	9.30999	10.2322	9.35033	8.26134	9.62903	8.91047	8.43106	8.40668	7.35467	7.69827	8.23701	8.42695	7.57096	7.50843	7.252	7.28799	7.43638	7.5301	8.42213	7.83029	7.99503	7.7757	8.32363	7.99788	8.28006	8.20845	7.92571	8.52221	8.30727	8.80149	7.61749	7.53907	8.20919	7.90429	8.02126	8.32848	7.91761
1554.63	6432.42	7.62151	7.95655	8.65264	8.07533	8.46306	8.66757	5.97223	7.06717	8.74086	8.91998	8.61817	8.98675	9.90749	9.01255	7.95164	9.33226	8.60072	8.12627	8.09534	7.04978	7.3678	7.94338	8.1252	7.28545	7.1977	6.99369	7.01931	7.15626	7.24919	8.13178	7.53932	7.69544	7.4871	8.0411	7.70906	7.99274	7.89646	7.6466	8.23626	8.01554	8.49832	7.35482	7.29011	7.92114	7.60226	7.75778	8.03518	7.62224
1556.55	6424.45	7.40103	7.80848	8.57313	7.91585	8.30077	8.42516	5.82793	6.96468	8.60464	8.79889	8.4771	8.80079	9.75543	8.84281	7.8444	9.30509	8.47732	7.8012	7.91856	6.90749	7.22672	7.69033	7.9932	7.13624	6.90111	6.90829	6.88356	7.05237	7.09003	8.00335	7.40371	7.53189	7.32548	7.94308	7.52992	7.8673	7.72997	7.52458	8.09105	7.8137	8.35517	7.26974	7.20324	7.76877	7.41607	7.68151	7.91021	7.46314
1558.48	6416.49	6.39301	6.82153	7.73574	6.97933	7.42266	7.69366	5.18506	5.97427	7.53507	7.78286	7.50358	7.79531	8.73273	7.87775	6.91483	8.25409	7.61095	7.57605	7.12376	6.18203	6.29476	6.9726	7.15316	6.40082	5.94362	6.07252	6.18067	6.32139	6.35612	7.13882	6.46281	6.68075	6.4946	7.16812	6.69232	7.15399	6.93253	6.68485	7.33418	7.01267	7.48679	6.50227	6.55326	7.01666	6.66052	6.9558	7.08344	6.74698
1560.41	6408.56	6.40229	6.66592	7.3465	6.81542	7.20817	7.54199	5.01211	5.80347	7.37268	7.4838	7.295	7.64362	8.49987	7.69402	6.67606	7.76267	7.3159	7.42729	6.99771	5.98984	6.12701	6.83672	6.8774	6.21431	6.15425	5.78888	5.93395	6.05197	6.15007	6.89434	6.29663	6.51502	6.34417	6.80569	6.53437	6.8454	6.72085	6.43927	7.02781	6.86876	7.21485	6.19211	6.17462	6.7716	6.47669	6.58197	6.79863	6.50804
1562.34	6400.65	6.39788	6.67089	7.2676	6.852	7.17425	7.44521	4.94407	5.85757	7.43041	7.53911	7.30733	7.62933	8.50159	7.67072	6.69366	7.8833	7.2992	7.075	6.93051	5.94223	6.14548	6.70193	6.83554	6.12995	6.15186	5.86203	5.86886	6.03003	6.09192	6.88992	6.37156	6.50826	6.31617	6.7561	6.49107	6.80409	6.68297	6.44865	6.96489	6.82156	7.2231	6.16528	6.08665	6.69334	6.42485	6.52719	6.83532	6.46364
1564.27	6392.76	6.16353	6.43731	7.02281	6.6272	6.92802	7.19071	4.75737	5.6723	7.18813	7.33077	7.0761	7.37351	8.24767	7.40682	6.46276	7.68015	7.07274	6.82031	6.69658	5.71438	5.92441	6.46952	6.59689	5.88345	5.92889	5.68886	5.6482	5.81444	5.87029	6.65976	6.17118	6.28291	6.08417	6.53591	6.25654	6.57738	6.44072	6.23172	6.73018	6.57877	6.9957	5.93519	5.87239	6.45533	6.1706	6.30788	6.62639	6.23652
1566.2	6384.89	5.87184	6.14539	6.7083	6.34667	6.61797	6.86302	4.51265	5.42279	6.87993	7.03645	6.77918	7.05932	7.92191	7.07723	6.17455	7.38041	6.74432	6.46622	6.40771	5.42986	5.66561	6.16508	6.29236	5.59565	5.6577	5.44698	5.37201	5.55854	5.60019	6.37558	5.90796	6.00645	5.80195	6.24962	5.96654	6.31565	6.14583	5.96122	6.42156	6.24588	6.68431	5.66506	5.59545	6.15666	5.85526	6.05148	6.34868	5.955
1568.13	6377.03	5.59635	5.88373	6.46647	6.0797	6.33514	6.59342	4.29535	5.19883	6.62914	6.78026	6.51466	6.7612	7.6324	6.78172	5.91919	7.15618	6.47489	6.21439	6.14114	5.1788	5.43089	5.89909	6.03587	5.36449	5.40784	5.23767	5.12625	5.32174	5.34439	6.11099	5.66979	5.75099	5.54013	5.99465	5.69883	6.06484	5.87642	5.69279	6.16007	5.96694	6.42877	5.45239	5.33621	5.88833	5.61449	5.80659	6.09788	5.68607
1570.06	6369.2	5.11159	5.35121	5.95689	5.55632	5.81687	6.09942	3.91639	4.7403	6.04634	6.17771	5.96937	6.2146	7.04646	6.23591	5.38555	6.4809	5.94737	5.94715	5.6947	4.7094	4.9041	5.47547	5.51177	4.92002	4.99412	4.7458	4.68926	4.84566	4.89687	5.60109	5.16589	5.27988	5.07966	5.50631	5.23909	5.57505	5.39746	5.20825	5.68	5.50913	5.91131	4.9843	4.89123	5.42299	5.2133	5.3097	5.59106	5.2309
1571.99	6361.38	4.95754	5.18762	5.74971	5.40746	5.62316	5.85457	3.75465	4.60914	5.85319	5.9929	5.7963	6.03796	6.86121	6.02528	5.21948	6.32444	5.77642	5.60388	5.50101	4.55579	4.76335	5.25395	5.31577	4.72883	4.83961	4.62148	4.50877	4.68602	4.7233	5.43521	5.04146	5.11499	4.91451	5.30145	5.05756	5.40467	5.21141	5.04879	5.46361	5.31442	5.70044	4.80089	4.7232	5.2229	5.00586	5.14864	5.42446	5.05533
1573.91	6353.59	4.7108	4.96616	5.53057	5.19588	5.37554	5.57803	3.54296	4.43101	5.63774	5.81093	5.57333	5.78228	6.63007	5.7617	5.00432	6.21054	5.5718	5.248	5.24146	4.34222	4.57201	4.98619	5.09933	4.49568	4.58123	4.48478	4.29093	4.48623	4.50034	5.22201	4.86952	4.89248	4.68343	5.07633	4.81038	5.19313	4.96426	4.82749	5.23427	5.05857	5.47112	4.59465	4.53835	4.98381	4.74546	4.96173	5.23833	4.82597
1575.84	6345.81	4.21889	4.47836	5.06648	4.69317	4.88492	5.1581	3.21408	3.97036	5.12914	5.27435	5.06188	5.23835	6.07547	5.23834	4.52097	5.62999	5.07681	5.06278	4.82544	3.92696	4.09141	4.61964	4.63822	4.05779	4.14913	4.03834	3.88695	4.05638	4.08891	4.74399	4.38393	4.42856	4.24371	4.62852	4.35699	4.74342	4.50909	4.36989	4.84075	4.61908	5.0201	4.15458	4.14476	4.54735	4.32055	4.51201	4.75866	4.39285
1577.77	6338.05	3.86117	4.07699	4.61718	4.30527	4.47698	4.77916	2.90865	3.59178	4.6925	4.80455	4.6215	4.8149	5.60622	4.801	4.11422	5.08328	4.6249	4.7474	4.4821	3.58658	3.70322	4.24723	4.20902	3.68448	3.87969	3.66438	3.52099	3.68703	3.73135	4.34445	4.00509	4.05692	3.88331	4.24482	3.99002	4.36244	4.13517	4.00702	4.41464	4.26571	4.59852	3.77412	3.7192	4.16124	3.93038	4.09358	4.35856	4.0293
1579.7	6330.31	3.70177	3.91035	4.41425	4.15205	4.28672	4.55072	2.75878	3.46684	4.50931	4.63724	4.43938	4.63649	5.41304	4.59816	3.94444	4.95066	4.43882	4.43886	4.29745	3.40617	3.56277	4.00991	4.02117	3.49069	3.7229	3.55604	3.32855	3.52538	3.54321	4.16685	3.89073	3.88789	3.70661	4.03616	3.81975	4.20083	3.94032	3.84499	4.16739	4.07809	4.41124	3.59985	3.49999	3.96121	3.75224	3.91225	4.20009	3.84439
1581.63	6322.59	3.40058	3.59785	4.08138	3.84921	3.95776	4.21327	2.5254	3.19458	4.17252	4.30802	4.11362	4.29229	5.05972	4.24925	3.63018	4.63547	4.1096	4.12469	3.99736	3.11505	3.27638	3.6827	3.70571	3.20301	3.44933	3.30652	3.04571	3.25419	3.24591	3.8607	3.6283	3.58674	3.41302	3.71483	3.51952	3.90571	3.62478	3.54709	3.84488	3.76037	4.09484	3.30406	3.21845	3.64974	3.45946	3.62216	3.90313	3.54314
1583.56	6314.89	3.12125	3.30816	3.7776	3.5708	3.65089	3.89289	2.31341	2.95932	3.86013	3.98642	3.81317	3.95955	4.72911	3.9184	3.3422	4.3258	3.80267	3.85064	3.72379	2.86707	3.01254	3.39987	3.41682	2.94257	3.20151	3.07171	2.79834	3.01037	2.98992	3.58741	3.36741	3.31305	3.15029	3.43396	3.23263	3.63343	3.34104	3.27404	3.55181	3.47422	3.80812	3.02953	2.97195	3.369	3.18318	3.37532	3.6297	3.2704
1585.49	6307.21	2.81008	2.98627	3.45301	3.25609	3.31401	3.54014	2.07849	2.69191	3.50326	3.65	3.47734	3.60512	4.36041	3.55012	3.02155	3.98524	3.47503	3.54902	3.42079	2.58125	2.69705	3.08486	3.09481	2.64418	2.92599	2.80888	2.51456	2.72959	2.70513	3.27579	3.06804	3.01094	2.85166	3.14308	2.91582	3.32749	3.019	2.97103	3.25108	3.17028	3.48696	2.7488	2.67982	3.05655	2.86839	3.06666	3.32381	2.96947
1587.42	6299.55	2.55484	2.72379	3.18875	2.99481	3.03282	3.23905	1.88261	2.47546	3.21154	3.37749	3.19494	3.31562	4.04925	3.24724	2.75778	3.70693	3.20586	3.28681	3.16773	2.34546	2.45421	2.8274	2.82995	2.39631	2.71898	2.59405	2.275	2.50075	2.46352	3.01306	2.83224	2.75968	2.59864	2.87785	2.65448	3.07716	2.74477	2.71473	3.0034	2.9093	3.21063	2.52767	2.43403	2.78807	2.61904	2.80362	3.06585	2.72131
1589.34	6291.9	2.25734	2.4118	2.87401	2.68428	2.7038	2.90408	1.64183	2.21129	2.87466	3.02811	2.86282	2.96732	3.68571	2.88858	2.44271	3.36948	2.89903	3.0096	2.87918	2.06622	2.17798	2.53873	2.5205	2.12152	2.46735	2.33757	2.00538	2.22183	2.18609	2.70934	2.56041	2.46244	2.30609	2.57018	2.36204	2.77209	2.43043	2.41435	2.67186	2.60319	2.89273	2.24797	2.147	2.47586	2.31927	2.50724	2.76645	2.43177
1591.27	6284.28	2.02572	2.16238	2.61265	2.44069	2.44007	2.63065	1.45289	1.99495	2.60594	2.74183	2.5962	2.67359	3.39746	2.59245	2.18746	3.09727	2.6589	2.76587	2.64364	1.83886	1.95188	2.30183	2.26288	1.90092	2.25202	2.14202	1.79501	1.99507	1.97112	2.46931	2.33816	2.22611	2.07233	2.32804	2.12483	2.52846	2.18572	2.17132	2.39071	2.35543	2.63862	2.0132	1.93305	2.22938	2.05196	2.26827	2.52352	2.18312
1593.2	6276.67	1.7586	1.87672	2.30605	2.16545	2.14138	2.33706	1.25752	1.75739	2.29587	2.42986	2.28741	2.34192	3.0666	2.26327	1.8959	2.79243	2.37072	2.50018	2.37714	1.58395	1.68026	2.04165	1.97494	1.62145	1.97568	1.91455	1.54801	1.74755	1.71404	2.18844	2.0778	1.94954	1.80657	2.04881	1.85033	2.27306	1.91487	1.89902	2.10081	2.05509	2.34693	1.75744	1.70661	1.95177	1.76735	2.01299	2.24957	1.90786
1595.13	6269.08	1.53263	1.64461	2.04965	1.92686	1.88919	2.10291	1.11607	1.55218	2.04115	2.17	2.02047	2.07634	2.77624	1.99683	1.66722	2.52198	2.12277	2.31499	2.17316	1.38605	1.47654	1.82432	1.74435	1.42474	1.77798	1.71871	1.33933	1.54112	1.50379	1.94716	1.86311	1.72124	1.59348	1.79011	1.63201	2.05499	1.68714	1.67728	1.87805	1.82481	2.09814	1.55146	1.49787	1.72041	1.56997	1.78024	2.01395	1.68668
1597.06	6261.51	1.28971	1.39534	1.78098	1.67624	1.62396	1.84001	0.936902	1.33915	1.76471	1.90294	1.73993	1.79677	2.47171	1.71387	1.42058	2.24096	1.84396	2.07958	1.94675	1.17506	1.24649	1.55684	1.49556	1.21292	1.55599	1.51614	1.12092	1.32046	1.2826	1.70023	1.64582	1.48382	1.36696	1.53001	1.39542	1.80069	1.43429	1.44298	1.63261	1.59722	1.84589	1.31601	1.25831	1.47263	1.34925	1.51924	1.76834	1.45872
1598.99	6253.95	1.12069	1.22158	1.59015	1.50259	1.43185	1.62943	0.820091	1.19996	1.55477	1.71587	1.54703	1.58627	2.26178	1.50317	1.24462	2.06781	1.6403	1.88512	1.77141	1.02923	1.07188	1.38182	1.32927	1.03317	1.39978	1.38839	0.97165	1.1622	1.13192	1.53339	1.49676	1.31401	1.20336	1.36029	1.22394	1.61991	1.25084	1.27	1.43743	1.40507	1.66646	1.13794	1.10007	1.29122	1.17224	1.35803	1.59727	1.29065
1600.92	6246.42	0.906077	0.995223	1.35217	1.28777	1.19146	1.37312	0.676904	1.02085	1.2955	1.46285	1.30673	1.32146	1.99402	1.23675	1.02111	1.83571	1.4122	1.68495	1.56214	0.84429	0.853116	1.18047	1.11544	0.832549	1.20753	1.21421	0.787762	0.964283	0.935751	1.31717	1.29256	1.1011	0.998343	1.14614	1.01219	1.40684	1.02971	1.05485	1.20385	1.16499	1.44231	0.939308	0.912952	1.07908	0.944341	1.18531	1.38788	1.07465
1602.85	6238.9	0.755625	0.837874	1.18829	1.12774	1.01437	1.20581	0.587744	0.927864	1.11052	1.27522	1.13666	1.1314	1.7924	1.0428	0.864998	1.64208	1.26297	1.56491	1.43416	0.709814	0.741074	1.03724	0.958389	0.708797	1.0962	1.08474	0.65595	0.819025	0.799175	1.15697	1.15095	0.954598	0.853628	0.989927	0.859811	1.2478	0.863122	0.898628	1.0545	1.01133	1.26741	0.807472	0.80612	0.926717	0.781339	1.05629	1.22843	0.910528
1604.77	6231.4	0.586098	0.65925	1.00511	0.954535	0.826755	1.00948	0.470114	0.804987	0.90015	1.08465	0.935278	0.929571	1.57646	0.836502	0.689672	1.45651	1.09126	1.38431	1.26842	0.549246	0.605042	0.855343	0.790665	0.55	0.949258	0.954589	0.510259	0.65945	0.645028	0.990539	0.99863	0.794395	0.68649	0.816602	0.694541	1.09339	0.684931	0.728477	0.886813	0.840796	1.08159	0.652703	0.650803	0.752711	0.639877	0.883851	1.05675	0.730017
1606.7	6223.92	0.483838	0.546307	0.882576	0.84377	0.705716	0.875916	0.389498	0.715043	0.758158	0.967061	0.8057	0.791165	1.43178	0.686944	0.570945	1.3491	1.00985	1.27192	1.14839	0.45863	0.507118	0.753494	0.683216	0.454591	0.844991	0.879657	0.421299	0.56887	0.547157	0.883734	0.904105	0.685596	0.578638	0.712556	0.584363	0.986609	0.562615	0.608722	0.783656	0.727684	0.968324	0.567018	0.551664	0.637717	0.536889	0.770644	0.949741	0.624008
1608.63	6216.46	0.337104	0.386068	0.714189	0.683349	0.541861	0.712971	0.281252	0.584597	0.583863	0.766029	0.631954	0.589623	1.2275	0.49098	0.412124	1.15248	0.854613	1.17298	1.01606	0.322833	0.359631	0.627977	0.524666	0.330321	0.703242	0.746592	0.295097	0.45654	0.418824	0.727152	0.764343	0.534218	0.44046	0.556832	0.436169	0.826337	0.411357	0.453384	0.617755	0.591041	0.812022	0.446089	0.450075	0.487358	0.38948	0.616212	0.793288	0.487041
1610.56	6209.02	0.277995	0.318057	0.631623	0.61213	0.462891	0.629287	0.253748	0.535964	0.51325	0.676907	0.548477	0.492942	1.12481	0.401167	0.34587	1.06079	0.752612	1.10937	0.960274	0.260211	0.289837	0.554647	0.450599	0.255114	0.637753	0.692985	0.237564	0.400635	0.361876	0.651403	0.699352	0.462348	0.382987	0.473222	0.3715	0.745366	0.342	0.376095	0.529693	0.513955	0.727782	0.386756	0.407388	0.415157	0.326884	0.564171	0.709839	0.408686
1612.49	6201.59	0.181783	0.216311	0.512039	0.527472	0.350481	0.476255	0.179461	0.455207	0.396832	0.598746	0.432694	0.380348	1.00539	0.284616	0.244931	0.992021	0.638354	0.929258	0.852871	0.185896	0.193114	0.416823	0.360787	0.170187	0.539606	0.637885	0.150464	0.302183	0.268592	0.558988	0.628417	0.369278	0.292643	0.367274	0.275024	0.660465	0.238956	0.271355	0.430175	0.392271	0.620263	0.28758	0.334073	0.312184	0.222706	0.510544	0.625223	0.308913
1614.42	6194.18	0.111798	0.155201	0.443638	0.490017	0.280253	0.363894	0.149152	0.414615	0.316153	0.557621	0.388811	0.31792	0.942872	0.199332	0.196228	1.02249	0.597523	0.791318	0.763168	0.169121	0.162267	0.348801	0.339771	0.13345	0.461839	0.644417	0.110722	0.278582	0.22136	0.518229	0.599327	0.320357	0.235127	0.32003	0.227213	0.637537	0.1824	0.201747	0.380696	0.311184	0.582056	0.252723	0.335979	0.261381	0.159723	0.515614	0.60385	0.254699
1616.35	6186.79	0.102214	0.057025	0.288172	0.312794	0.107759	0.268454	0.145678	0.25134	0.129562	0.276186	0.263361	0.163857	0.720531	0.044938	0.117941	0.7662	0.416744	0.877389	0.644167	0.131642	0.112197	0.341622	0.227668	0.098281	0.321467	0.470384	0.090701	0.192017	0.13873	0.355152	0.397444	0.178368	0.124245	0.203869	0.115574	0.486808	0.078939	0.061049	0.284694	0.207854	0.454493	0.175652	0.323716	0.153572	0.06073	0.424666	0.434466	0.136581
1618.28	6179.41	0.064519	0.03838	0.315526	0.317235	0.127863	0.28469	0.137652	0.264344	0.125866	0.28201	0.245831	0.158991	0.720201	0.045247	0.108757	0.68702	0.425386	0.910214	0.701846	0.120751	0.108931	0.345436	0.211703	0.068696	0.385585	0.447016	0.071078	0.179447	0.144211	0.360846	0.407728	0.183731	0.138677	0.18599	0.118494	0.45514	0.068648	0.079477	0.268443	0.243252	0.416703	0.150603	0.294712	0.158455	0.065684	0.384428	0.404276	0.129968
1620.21	6172.06	0.073138	0.043674	0.27406	0.314109	0.091471	0.182465	0.10542	0.262264	0.081162	0.306776	0.210579	0.129889	0.703818	0.03806	0.083778	0.758497	0.425576	0.696921	0.628668	0.108204	0.0804	0.246333	0.186216	0.070642	0.367062	0.485764	0.080276	0.132905	0.107676	0.343767	0.416029	0.159956	0.09052	0.159967	0.088633	0.445702	0.049991	0.046549	0.205312	0.183752	0.39163	0.111788	0.281213	0.115598	0.009413	0.380052	0.419866	0.112626
1622.13	6164.72	0.1037	0.07342	0.265777	0.288402	0.054108	0.143332	0.129095	0.266993	0.068496	0.267325	0.217387	0.143243	0.674702	0.085985	0.108546	0.772721	0.42256	0.725525	0.602192	0.129313	0.105169	0.291129	0.198278	0.096432	0.344285	0.481974	0.10336	0.144074	0.113807	0.323964	0.402729	0.144045	0.083131	0.15396	0.090331	0.43337	0.068415	0.035781	0.228404	0.169894	0.404388	0.120619	0.323023	0.114368	0.021231	0.383784	0.407382	0.116808
1624.06	6157.4	0.140019	0.13071	0.196179	0.209176	0.010995	0.128494	0.105364	0.227362	0.079241	0.184122	0.169372	0.127585	0.566946	0.140298	0.13398	0.600584	0.336527	0.765954	0.572247	0.136133	0.118525	0.245939	0.141687	0.140174	0.286105	0.383853	0.130123	0.150811	0.104555	0.26185	0.316674	0.101111	0.063081	0.110238	0.091175	0.355257	0.090131	0.042952	0.193712	0.13575	0.325578	0.12591	0.31423	0.088868	0.010245	0.319874	0.31069	0.08592
1625.99	6150.09	0.095907	0.093643	0.223428	0.254044	0.027016	0.146792	0.108594	0.266788	0.059749	0.234542	0.181717	0.112962	0.610428	0.110345	0.110584	0.681262	0.378404	0.715001	0.58516	0.126002	0.107485	0.248775	0.156055	0.107821	0.342057	0.444636	0.102848	0.136653	0.113164	0.302316	0.354748	0.114249	0.069447	0.112329	0.086277	0.39327	0.06624	0.042886	0.190593	0.155812	0.350212	0.106441	0.319651	0.095138	0.008693	0.337557	0.352169	0.080985
1627.92	6142.81	0.154467	0.138168	0.18809	0.208889	0.023246	0.103266	0.106402	0.205922	0.081807	0.145825	0.150379	0.112083	0.556309	0.163892	0.135422	0.626046	0.330411	0.742947	0.558154	0.124361	0.120386	0.237348	0.141064	0.146351	0.332845	0.400431	0.144159	0.112095	0.115413	0.248427	0.308379	0.091847	0.054713	0.120088	0.076096	0.352596	0.09513	0.057755	0.16412	0.114198	0.311965	0.128228	0.291308	0.081232	0.039273	0.282597	0.311032	0.077252
1629.85	6135.54	0.105404	0.093471	0.22506	0.241039	0.017323	0.145027	0.095118	0.237601	0.060444	0.202701	0.151802	0.090605	0.591218	0.115234	0.102869	0.64327	0.353071	0.742576	0.593575	0.1039	0.0792	0.235984	0.146702	0.120718	0.345051	0.425273	0.123736	0.118595	0.106782	0.273315	0.35607	0.109772	0.059717	0.124125	0.069619	0.385657	0.074385	0.03206	0.174182	0.139326	0.338236	0.127849	0.284235	0.079827	0.025969	0.292719	0.334675	0.078179
1631.78	6128.28	0.131066	0.133609	0.174759	0.233568	0.017251	0.075717	0.082763	0.22118	0.070644	0.233976	0.148816	0.116996	0.565171	0.155907	0.131979	0.694542	0.344941	0.565619	0.528279	0.133094	0.0858	0.155355	0.126717	0.152113	0.29119	0.451285	0.155019	0.121264	0.109838	0.261448	0.353175	0.100676	0.05153	0.135666	0.06907	0.382426	0.113025	0.063135	0.124899	0.088219	0.314822	0.127469	0.320349	0.073294	0.087526	0.321014	0.34401	0.079289
1633.71	6121.05	0.183106	0.184121	0.142017	0.241224	0.060355	0.048453	0.125774	0.198962	0.1172	0.239427	0.219948	0.184887	0.562351	0.214178	0.182837	0.780167	0.358015	0.454676	0.475535	0.16688	0.104766	0.142935	0.162731	0.197914	0.271568	0.493377	0.199385	0.142339	0.174776	0.267907	0.312958	0.130027	0.086437	0.195457	0.108439	0.380226	0.150604	0.112217	0.160142	0.05767	0.313667	0.182693	0.441595	0.118075	0.12273	0.416073	0.37578	0.12675
1635.64	6113.83	0.356357	0.341584	0.068942	0.150309	0.201191	0.049885	0.183863	0.088037	0.292637	0.067681	0.275529	0.31581	0.389884	0.355576	0.303199	0.493864	0.20142	0.666429	0.414343	0.254128	0.223065	0.166408	0.224353	0.334392	0.20843	0.304571	0.304241	0.19111	0.268283	0.207513	0.168676	0.214446	0.16696	0.291992	0.199214	0.236866	0.255366	0.216439	0.2104	0.059134	0.193285	0.333029	0.521841	0.186626	0.155397	0.428926	0.236371	0.218971
1637.56	6106.63	0.194488	0.182516	0.153473	0.162299	0.062514	0.09845	0.11727	0.190553	0.133159	0.074929	0.163197	0.168899	0.472724	0.199301	0.175766	0.494147	0.307082	0.811276	0.572368	0.14011	0.144893	0.245894	0.16411	0.181364	0.345642	0.328103	0.177373	0.15314	0.141499	0.212997	0.235468	0.110546	0.079705	0.182183	0.094803	0.289541	0.153486	0.097958	0.213959	0.101401	0.270382	0.225049	0.303918	0.102006	0.032695	0.275707	0.253849	0.113958
1639.49	6099.44	0.167233	0.162562	0.162094	0.181236	0.042666	0.073884	0.086649	0.224873	0.100456	0.13021	0.111886	0.137656	0.490011	0.19361	0.159758	0.582454	0.327864	0.700485	0.554505	0.099304	0.146333	0.206406	0.140483	0.15625	0.295319	0.382671	0.164652	0.133727	0.118563	0.220516	0.273078	0.095946	0.058483	0.154141	0.067446	0.320234	0.142137	0.084246	0.163308	0.083095	0.287106	0.162139	0.236383	0.076291	0.036844	0.228012	0.283449	0.087033
1641.42	6092.28	0.11477	0.122966	0.207258	0.232095	0.006414	0.094246	0.084621	0.266759	0.085308	0.22227	0.142438	0.121419	0.546122	0.157658	0.135392	0.665769	0.360724	0.663366	0.57606	0.099145	0.120457	0.215516	0.147316	0.130479	0.31842	0.443354	0.14202	0.12314	0.110963	0.260135	0.332198	0.105172	0.059571	0.134597	0.068342	0.371281	0.10552	0.062599	0.182625	0.104249	0.32258	0.130145	0.288088	0.07974	0.028208	0.2706	0.323785	0.08735
1643.35	6085.13	0.166021	0.187891	0.147786	0.222577	0.062882	0.060918	0.121934	0.220952	0.131513	0.22416	0.163295	0.158271	0.516276	0.222654	0.192413	0.710712	0.327699	0.482227	0.484387	0.157191	0.158652	0.126125	0.148937	0.187186	0.30136	0.459608	0.191408	0.144623	0.143366	0.239491	0.307123	0.100668	0.077468	0.157869	0.089407	0.356144	0.148751	0.099542	0.157784	0.06592	0.291694	0.152349	0.385086	0.101921	0.101955	0.300227	0.322563	0.111739
1645.28	6077.99	0.257296	0.267985	0.117145	0.232872	0.119845	0.124785	0.210065	0.229353	0.216033	0.165395	0.273525	0.233245	0.500944	0.321442	0.279131	0.777357	0.290632	0.451955	0.391789	0.246155	0.253999	0.165837	0.238353	0.269483	0.336182	0.469466	0.257895	0.234469	0.215293	0.247514	0.269935	0.145189	0.124234	0.247685	0.137417	0.353516	0.182185	0.146352	0.207672	0.068006	0.307761	0.218363	0.575449	0.164317	0.132856	0.425039	0.333134	0.173633
1647.21	6070.88	0.384333	0.378472	0.051081	0.166426	0.217285	0.132866	0.235759	0.138993	0.35296	0.125186	0.298617	0.323295	0.371956	0.408975	0.343728	0.487945	0.141524	0.697972	0.383201	0.313422	0.278324	0.254147	0.279287	0.35827	0.335717	0.28153	0.306729	0.24808	0.264677	0.200051	0.14885	0.200859	0.15699	0.300879	0.19259	0.23093	0.208457	0.199477	0.20615	0.044298	0.189156	0.298473	0.591448	0.197564	0.177776	0.452875	0.211372	0.224564
1649.14	6063.78	0.218886	0.217326	0.156543	0.215134	0.080735	0.076216	0.180562	0.195559	0.190773	0.139761	0.234259	0.196454	0.505454	0.246709	0.222229	0.616408	0.284564	0.583774	0.485328	0.211993	0.142046	0.229023	0.214551	0.217071	0.41912	0.396264	0.198404	0.15653	0.17991	0.250445	0.244414	0.133131	0.089341	0.224648	0.108776	0.32103	0.136664	0.105811	0.167812	0.068027	0.252755	0.238551	0.467315	0.134803	0.104705	0.400046	0.288572	0.142899
1651.07	6056.69	0.389582	0.38173	0.055756	0.218407	0.215846	0.324706	0.303024	0.181666	0.344695	0.151436	0.315831	0.316599	0.451128	0.438651	0.37477	0.798182	0.232096	0.246057	0.247724	0.298343	0.215566	0.148481	0.293261	0.343605	0.338712	0.463164	0.338926	0.293536	0.299976	0.267578	0.225342	0.227724	0.193593	0.4016	0.183478	0.335889	0.27451	0.217509	0.198374	0.143876	0.219749	0.386462	0.674103	0.226668	0.214676	0.571416	0.327277	0.216994
1653	6049.62	0.508866	0.491788	0.074449	0.263544	0.305993	0.264622	0.452221	0.213066	0.521133	0.294368	0.486045	0.464533	0.383597	0.573318	0.492322	0.560427	0.150891	0.709685	0.253272	0.345423	0.279208	0.316461	0.409815	0.494589	0.453	0.290316	0.463033	0.495779	0.42727	0.39168	0.367028	0.385526	0.253464	0.621651	0.257794	0.311414	0.342777	0.295177	0.388778	0.165901	0.181776	0.589492	1.06237	0.291456	0.160943	0.864975	0.264438	0.305535
1654.92	6042.57	0.229741	0.245843	0.142325	0.138306	0.115313	0.09916	0.185502	0.137393	0.244472	0.1253	0.223701	0.227683	0.426196	0.268414	0.233699	0.392231	0.241554	0.850955	0.503123	0.184738	0.141017	0.242161	0.184972	0.243672	0.448364	0.258026	0.259007	0.238773	0.209317	0.200025	0.19064	0.168005	0.100938	0.283078	0.119664	0.255406	0.189128	0.148647	0.237643	0.137081	0.226066	0.309882	0.517028	0.131228	0.076707	0.422499	0.20222	0.162711
1656.85	6035.54	0.084007	0.112851	0.233232	0.229383	0.034367	0.16142	0.111532	0.241421	0.109996	0.254425	0.15828	0.120109	0.574514	0.130836	0.124374	0.62719	0.388103	0.752037	0.583159	0.119449	0.092371	0.241379	0.155561	0.114201	0.428381	0.429337	0.143026	0.142301	0.128544	0.264579	0.307502	0.117844	0.07825	0.174414	0.079395	0.36838	0.094881	0.053679	0.219723	0.147347	0.354956	0.180855	0.300667	0.095455	0.040074	0.306403	0.328328	0.098637
1658.78	6028.52	0.109181	0.13216	0.206816	0.23614	0.018261	0.106188	0.095535	0.248009	0.092066	0.262794	0.142259	0.115604	0.567793	0.153124	0.139556	0.707885	0.377718	0.62636	0.529937	0.1096	0.091607	0.184915	0.156226	0.135332	0.344396	0.469269	0.153547	0.145824	0.123369	0.266633	0.325058	0.107036	0.066958	0.171542	0.074346	0.377126	0.109788	0.059674	0.190452	0.116022	0.359316	0.176247	0.283019	0.087726	0.071184	0.272358	0.35211	0.086147
1660.71	6021.52	0.105551	0.125712	0.239	0.27301	0.029253	0.125033	0.134788	0.309864	0.083574	0.29361	0.212501	0.132701	0.603047	0.143194	0.150724	0.798203	0.399489	0.615778	0.526694	0.124979	0.110834	0.223307	0.196333	0.147059	0.348071	0.518266	0.162143	0.171494	0.149371	0.293627	0.344035	0.13158	0.090109	0.197506	0.09379	0.410203	0.101616	0.056302	0.231883	0.147014	0.397545	0.207182	0.379949	0.117441	0.028331	0.340913	0.388256	0.088368
1662.64	6014.53	0.150767	0.168642	0.209964	0.2212	0.025142	0.132019	0.124965	0.249852	0.122461	0.212981	0.220024	0.156115	0.546619	0.174218	0.171906	0.669015	0.349419	0.738876	0.515119	0.142411	0.128721	0.271221	0.177468	0.20563	0.388132	0.432623	0.201739	0.171871	0.159998	0.245906	0.280584	0.128983	0.08301	0.216071	0.08801	0.355495	0.11034	0.071712	0.236775	0.145751	0.348965	0.203777	0.428005	0.118857	0.024182	0.38639	0.324405	0.090944
1664.57	6007.56	0.071219	0.085748	0.276889	0.282046	0.063281	0.173798	0.126205	0.296425	0.082568	0.293701	0.225015	0.138068	0.631182	0.089161	0.121216	0.721587	0.430501	0.7338	0.582163	0.124711	0.094751	0.290105	0.194756	0.1457	0.468477	0.482194	0.1398	0.155554	0.132253	0.300772	0.358372	0.133211	0.100144	0.182974	0.095783	0.414053	0.073138	0.047615	0.254199	0.189091	0.399015	0.140963	0.370466	0.131161	0.031453	0.395736	0.369494	0.099774
1666.5	6000.61	0.126595	0.128476	0.243975	0.289133	0.026206	0.081711	0.118897	0.298138	0.085359	0.314668	0.22828	0.14227	0.631809	0.130236	0.156994	0.850114	0.436085	0.547491	0.49457	0.159054	0.112899	0.216968	0.215648	0.166165	0.404452	0.540895	0.162571	0.15911	0.133057	0.305618	0.370936	0.134083	0.083087	0.195699	0.093498	0.440306	0.091985	0.060317	0.213161	0.119811	0.416288	0.177863	0.382571	0.118083	0.031183	0.410096	0.411833	0.103433
1668.43	5993.67	0.174544	0.167709	0.273407	0.310567	0.026183	0.108695	0.184052	0.30207	0.135384	0.277438	0.341394	0.19754	0.653479	0.180503	0.226825	0.892827	0.465037	0.63244	0.46743	0.226366	0.184226	0.312581	0.294139	0.20608	0.438843	0.547866	0.197328	0.204736	0.195846	0.326718	0.333609	0.175071	0.128779	0.275707	0.140105	0.45936	0.107146	0.080131	0.275279	0.132922	0.447555	0.262821	0.561371	0.177812	0.007591	0.511173	0.434131	0.136111
1670.35	5986.75	0.191382	0.186131	0.260921	0.265174	0.027841	0.121966	0.182135	0.248745	0.162391	0.175767	0.328694	0.197022	0.606657	0.185938	0.225513	0.715761	0.393804	0.777774	0.485092	0.227001	0.198163	0.323658	0.263605	0.1941	0.467269	0.439634	0.215234	0.220141	0.19702	0.297034	0.263668	0.169379	0.128113	0.279358	0.139248	0.397231	0.121535	0.079566	0.292172	0.176303	0.375681	0.265665	0.608496	0.170428	0.020306	0.489584	0.364558	0.125271
1672.28	5979.85	0.081296	0.083237	0.372164	0.357765	0.116973	0.196265	0.191245	0.339599	0.146736	0.331008	0.358903	0.224559	0.738501	0.091866	0.176988	0.8667	0.490911	0.748965	0.586244	0.201642	0.182824	0.334561	0.287565	0.122735	0.558856	0.54968	0.151767	0.222526	0.197926	0.378813	0.366054	0.198496	0.180807	0.253932	0.176726	0.46743	0.116741	0.093866	0.352191	0.263569	0.460605	0.221258	0.53196	0.204757	0.079762	0.49759	0.462976	0.156468
1674.21	5972.96	0.089741	0.107901	0.365978	0.346416	0.10684	0.196597	0.18119	0.311251	0.152164	0.348293	0.355033	0.217495	0.739191	0.10124	0.18646	0.907387	0.506433	0.767391	0.554741	0.1981	0.183974	0.36603	0.290993	0.14429	0.543242	0.56051	0.170462	0.237908	0.206256	0.364361	0.356563	0.187412	0.169303	0.262192	0.1708	0.476154	0.115288	0.09518	0.369529	0.249366	0.490902	0.247591	0.529148	0.202721	0.056046	0.500648	0.47851	0.163953
1676.14	5966.08	0.104397	0.112661	0.484361	0.426831	0.232767	0.354842	0.218188	0.397067	0.237919	0.42536	0.418725	0.291872	0.857787	0.152844	0.214025	0.911492	0.601202	0.952665	0.696012	0.243221	0.238723	0.525585	0.353667	0.150205	0.629659	0.576535	0.137362	0.281674	0.241813	0.440382	0.444307	0.262105	0.255834	0.29986	0.245167	0.556345	0.176569	0.180584	0.457593	0.358662	0.575558	0.265753	0.493831	0.287032	0.177946	0.492121	0.52279	0.225949
1678.07	5959.23	0.122822	0.120179	0.500053	0.480522	0.266411	0.333673	0.219453	0.459146	0.264962	0.494803	0.445141	0.328399	0.918592	0.182825	0.220022	1.04141	0.63505	0.831304	0.685155	0.216858	0.240213	0.482655	0.375607	0.142818	0.603722	0.651189	0.132567	0.274721	0.237844	0.480891	0.485846	0.286743	0.269119	0.322119	0.272633	0.608798	0.196074	0.202878	0.462808	0.35382	0.611342	0.264405	0.483767	0.29784	0.194806	0.50513	0.586875	0.243366
1680	5952.39	0.184218	0.194257	0.607554	0.581144	0.352082	0.376026	0.300286	0.547284	0.354928	0.585052	0.603765	0.442045	1.05191	0.271387	0.301846	1.20699	0.740262	0.854451	0.740896	0.281425	0.322957	0.552957	0.476202	0.203287	0.696923	0.757037	0.18632	0.354074	0.316669	0.563371	0.554513	0.356406	0.354017	0.401916	0.375904	0.696967	0.267643	0.277361	0.573071	0.433806	0.710852	0.323858	0.642396	0.38912	0.24659	0.648209	0.694582	0.314906
1681.93	5945.56	0.13617	0.146256	0.557869	0.58115	0.278622	0.266032	0.337623	0.517756	0.310027	0.516413	0.680426	0.44565	1.04635	0.208109	0.329829	1.30245	0.689087	0.686939	0.603727	0.304644	0.385179	0.53275	0.515105	0.242689	0.70075	0.785538	0.227704	0.391314	0.346765	0.551642	0.489757	0.330847	0.326339	0.422049	0.374981	0.705754	0.241202	0.247832	0.623228	0.409258	0.709505	0.363377	0.865132	0.388125	0.178871	0.78892	0.729811	0.310763
1683.86	5938.75	0.226459	0.2609	0.771836	0.673077	0.39083	0.500199	0.548933	0.644648	0.42576	0.519033	0.953674	0.648029	1.21106	0.350224	0.502603	1.31835	0.76726	1.22253	0.764481	0.499456	0.61717	0.906987	0.717368	0.369096	0.981202	0.772468	0.316848	0.527352	0.497022	0.65156	0.520378	0.434337	0.490088	0.54675	0.542154	0.77914	0.392339	0.355654	0.897417	0.631464	0.870374	0.497319	1.20518	0.585638	0.366641	1.01196	0.776963	0.445033
1685.79	5931.95	0.409395	0.454305	0.929591	0.809042	0.646108	0.786426	0.483077	0.704102	0.640611	0.797814	0.951768	0.796557	1.39512	0.624125	0.574469	1.3258	0.975377	1.38417	1.05085	0.542517	0.592546	0.941701	0.746285	0.423874	1.06114	0.813688	0.369871	0.5694	0.550004	0.793029	0.703189	0.590943	0.612074	0.599297	0.637046	0.90424	0.546556	0.53919	0.927878	0.775681	0.988138	0.511267	0.926547	0.689379	0.546265	0.884993	0.867109	0.580601
1687.71	5925.17	0.659213	0.70924	1.16766	1.04166	0.914365	1.03215	0.571395	0.893462	0.939171	1.15617	1.13082	1.03261	1.68054	0.910019	0.780603	1.68016	1.27104	1.47371	1.26385	0.688519	0.76002	1.07624	0.952819	0.616244	1.16812	1.05709	0.542004	0.740896	0.711808	1.02286	0.953381	0.80347	0.8043	0.804051	0.827884	1.14099	0.762033	0.747444	1.07496	0.965093	1.23357	0.693306	0.919169	0.867798	0.754001	1.01002	1.11628	0.778215
1689.64	5918.41	0.819185	0.878707	1.33943	1.19053	1.10451	1.24858	0.677381	1.00012	1.12894	1.34286	1.27229	1.22163	1.88264	1.13	0.945179	1.8503	1.44632	1.66586	1.43669	0.812973	0.91203	1.23467	1.11497	0.764836	1.26216	1.16576	0.67164	0.855181	0.841046	1.17396	1.09853	0.947219	0.954755	0.963111	0.984482	1.29457	0.93475	0.902713	1.22702	1.14856	1.41426	0.826919	0.971796	1.02221	0.92303	1.12832	1.27196	0.924114
1691.57	5911.66	1.07876	1.14623	1.60269	1.45321	1.37801	1.50123	0.833922	1.24077	1.43884	1.67046	1.54293	1.5317	2.2079	1.44338	1.20324	2.16956	1.73365	1.79694	1.67951	1.02332	1.13688	1.4241	1.36457	0.996308	1.44032	1.38444	0.883061	1.06874	1.0579	1.4358	1.35022	1.19746	1.17926	1.22278	1.23012	1.53168	1.18938	1.14565	1.46865	1.39055	1.66901	1.04768	1.14268	1.26122	1.14107	1.33889	1.52729	1.15285
1693.5	5904.93	1.1711	1.24453	1.73155	1.60695	1.5094	1.57046	0.856543	1.38825	1.58175	1.85087	1.71912	1.68999	2.4022	1.57381	1.31368	2.46257	1.90912	1.75057	1.7407	1.12008	1.24233	1.50734	1.50401	1.07696	1.5288	1.56353	0.971458	1.19411	1.15224	1.57186	1.45801	1.31324	1.29181	1.34733	1.36217	1.70163	1.32127	1.27346	1.649	1.48605	1.8282	1.16092	1.31308	1.38881	1.25203	1.48344	1.71953	1.29357
1695.43	5898.21	1.42509	1.51325	2.11207	1.90026	1.81456	1.83086	1.14969	1.68137	1.85219	2.10151	2.14281	2.05204	2.79987	1.89014	1.63349	2.8255	2.24117	2.19109	2.01551	1.45377	1.59424	1.99074	1.88156	1.32771	1.91573	1.7958	1.23149	1.51342	1.43081	1.85002	1.65585	1.57773	1.63012	1.61793	1.70935	2.00999	1.65865	1.57076	2.12862	1.80825	2.16628	1.42986	1.69977	1.74818	1.61779	1.80573	2.01702	1.61336
1697.36	5891.51	1.63735	1.74188	2.39368	2.16583	2.07858	2.04644	1.34224	1.86246	2.1024	2.30619	2.47995	2.3343	3.11036	2.19083	1.9047	3.05102	2.46194	2.40311	2.23265	1.69563	1.85481	2.28681	2.14937	1.55733	2.16186	1.95804	1.45136	1.69659	1.67531	2.11199	1.85435	1.82096	1.88277	1.85441	1.95429	2.24505	1.93022	1.8309	2.42252	2.08814	2.42524	1.67642	1.99494	2.02843	1.86629	2.10101	2.25213	1.8557
1699.29	5884.82	2.07074	2.19408	2.95942	2.60206	2.55064	2.53179	1.68038	2.24752	2.58744	2.71029	3.041	2.85893	3.6561	2.68113	2.34201	3.57173	2.94177	2.94729	2.63823	2.12376	2.23554	2.82581	2.62583	1.99431	2.61541	2.33003	1.83173	2.07298	2.07559	2.52576	2.24929	2.22372	2.29319	2.27379	2.38752	2.66713	2.34796	2.22101	2.87004	2.55152	2.89602	2.08175	2.52374	2.49613	2.27704	2.58984	2.66652	2.2259
1701.22	5878.15	2.66517	2.78946	3.52804	3.09891	3.16018	3.24027	2.08786	2.63293	3.24556	3.33804	3.51187	3.50862	4.28711	3.37585	2.89601	3.95168	3.4836	3.63062	3.25583	2.57228	2.69075	3.33197	3.14158	2.5392	3.11715	2.64034	2.35452	2.56635	2.58565	3.06276	2.74538	2.77809	2.80604	2.84124	2.91372	3.14669	2.89785	2.76273	3.33402	3.12748	3.42221	2.55559	2.85574	3.02932	2.80535	2.98577	3.12359	2.76612
1703.14	5871.49	3.16484	3.31805	4.01006	3.61566	3.69102	3.77243	2.42668	3.07038	3.84138	4.01564	4.00152	4.05681	4.87754	3.96079	3.41063	4.60789	4.02498	3.887	3.70895	2.98975	3.18926	3.67726	3.63892	3.01167	3.45684	3.12119	2.80724	3.00198	3.02043	3.59504	3.29554	3.28885	3.2431	3.37513	3.36588	3.65098	3.38562	3.24724	3.76775	3.56909	3.95446	3.01141	3.20873	3.4825	3.28648	3.43887	3.64973	3.25202
1705.07	5864.85	3.66284	3.81803	4.55247	4.10143	4.23369	4.36704	2.78488	3.48375	4.37756	4.5568	4.53848	4.59656	5.46211	4.53655	3.89494	5.1425	4.57256	4.47296	4.19877	3.4519	3.62191	4.20666	4.14859	3.49863	3.90723	3.52933	3.26486	3.42552	3.47809	4.07796	3.74412	3.75809	3.71559	3.86874	3.86351	4.12145	3.90014	3.7192	4.2941	4.06409	4.46417	3.46671	3.67517	3.993	3.80811	3.90677	4.14161	3.74
1707	5858.22	4.44128	4.61	5.31254	4.81811	5.03289	5.20861	3.37639	4.13919	5.22252	5.37428	5.27866	5.42047	6.29671	5.40945	4.64928	5.84844	5.34565	5.20624	4.96415	4.12124	4.30339	4.90643	4.87871	4.1956	4.56465	4.1093	3.93357	4.10489	4.16097	4.80173	4.39481	4.46959	4.4249	4.60307	4.5895	4.77939	4.62729	4.41834	5.02212	4.80683	5.183	4.15179	4.28936	4.70686	4.51971	4.59623	4.81622	4.43689
1708.93	5851.61	4.98096	5.17231	5.85767	5.39544	5.63049	5.7853	3.8092	4.64189	5.8324	6.0055	5.83304	6.04882	6.93719	6.04809	5.22347	6.49568	5.93305	5.66468	5.49967	4.62955	4.85033	5.40349	5.44968	4.69104	5.00245	4.62067	4.44327	4.64504	4.67959	5.37127	4.95215	5.03147	4.95401	5.16937	5.13772	5.34305	5.2079	4.98235	5.59896	5.39547	5.78181	4.70651	4.74599	5.25066	5.0605	5.14447	5.40434	4.99604
1710.86	5845.01	5.66278	5.87484	6.5801	6.10925	6.35342	6.47719	4.36204	5.27926	6.5657	6.75333	6.58129	6.81572	7.73894	6.81158	5.93242	7.28651	6.65685	6.25763	6.1546	5.27997	5.56249	6.08674	6.16756	5.33187	5.59346	5.24991	5.0811	5.29648	5.33666	6.07294	5.626	5.7191	5.62707	5.86988	5.82365	6.0459	5.92898	5.66644	6.31671	6.08775	6.50962	5.39754	5.3937	5.95236	5.74008	5.82692	6.11321	5.66915
1712.79	5838.43	6.21397	6.45369	7.25136	6.7334	6.97706	7.0302	4.84847	5.83989	7.19051	7.38692	7.26673	7.46518	8.45087	7.45104	6.54002	8.01244	7.27791	6.74228	6.67787	5.83614	6.18133	6.70158	6.79639	5.871	6.15332	5.82292	5.63504	5.8612	5.90374	6.67983	6.19797	6.29744	6.22457	6.4687	6.4346	6.67758	6.55649	6.27619	6.98719	6.687	7.16641	5.98252	6.04559	6.58545	6.3285	6.45742	6.75929	6.27102
1714.72	5831.86	6.94976	7.21443	8.22103	7.50813	7.79041	7.70852	5.55173	6.59787	8.00165	8.15978	8.18946	8.32451	9.37493	8.2731	7.32883	8.9091	8.08224	7.51055	7.38507	6.59949	6.97954	7.59693	7.65043	6.61931	6.96992	6.53281	6.3617	6.61781	6.63993	7.44271	6.88931	7.028	7.01715	7.24048	7.25129	7.45	7.35978	7.02929	7.86171	7.47412	7.98104	6.71859	6.9089	7.42096	7.12195	7.28642	7.52991	7.04319
1716.65	5825.31	7.78662	8.01881	9.23942	8.31569	8.68699	8.54859	6.27837	7.31826	8.81863	8.95246	9.12778	9.24831	10.3077	9.17559	8.12026	9.71352	8.95137	8.57565	8.18159	7.4075	7.71849	8.63552	8.54372	7.45466	7.8362	7.23609	7.17251	7.38326	7.44444	8.25326	7.61803	7.83432	7.82821	8.0806	8.11791	8.26448	8.21317	7.79069	8.81303	8.32861	8.83672	7.48043	7.80131	8.32329	7.99076	8.15616	8.31371	7.87234
1718.58	5818.77	9.08354	9.29128	10.389	9.48129	9.94584	9.98906	7.2887	8.35412	10.0799	10.248	10.2798	10.5586	11.5628	10.519	9.28942	10.7609	10.1712	9.89689	9.44132	8.5341	8.77927	9.78104	9.70252	8.65828	8.93009	8.19491	8.31834	8.43894	8.59536	9.4543	8.75361	9.05122	8.93849	9.29663	9.26187	9.37043	9.37029	8.89613	9.87355	9.51705	9.97885	8.57869	8.80683	9.47992	9.17147	9.25048	9.38779	8.99612
1720.5	5812.25	9.83321	10.0899	11.0508	10.2992	10.7444	10.8596	7.89684	9.08043	10.9573	11.1245	11.0151	11.3699	12.3796	11.3762	10.1125	11.6015	10.9439	10.4278	10.2024	9.22146	9.52798	10.3512	10.43	9.38741	9.56504	8.91929	9.0444	9.18422	9.32684	10.2675	9.54675	9.84126	9.67327	10.098	9.99558	10.1511	10.1519	9.72853	10.5814	10.3057	10.7821	9.34879	9.45224	10.2091	9.90025	9.97386	10.2232	9.78008
1722.43	5805.74	10.7051	10.9781	11.9497	11.1928	11.6565	11.7615	8.65058	9.91141	11.8916	12.0616	11.9214	12.3101	13.3336	12.3222	11.0042	12.5669	11.8527	11.2393	11.048	10.034	10.3666	11.1745	11.3182	10.2435	10.3749	9.75052	9.87314	10.0091	10.1548	11.1463	10.3941	10.6952	10.5207	10.9783	10.8694	11.036	11.0398	10.6016	11.4857	11.1662	11.6934	10.2067	10.2898	11.085	10.7518	10.8234	11.1236	10.6503
1724.36	5799.25	11.6615	11.9324	12.9246	12.1551	12.6513	12.7476	9.48846	10.7807	12.8664	13.075	12.8982	13.3227	14.3539	13.338	11.9474	13.5304	12.8263	12.1822	11.9845	10.9409	11.2571	12.1057	12.2752	11.1682	11.2717	10.6119	10.7733	10.8998	11.0684	12.0944	11.284	11.6285	11.4482	11.9336	11.8217	11.991	12.007	11.5347	12.4532	12.1116	12.6538	11.1229	11.2085	12.0449	11.6976	11.7255	12.0639	11.5994
1726.29	5792.77	12.6112	12.9121	13.9138	13.1371	13.6488	13.7323	10.3318	11.6871	13.884	14.1099	13.9006	14.3262	15.3878	14.3592	12.9335	14.5517	13.8058	13.0429	12.9207	11.8658	12.2198	13.0394	13.2385	12.0847	12.1525	11.5132	11.6807	11.8309	11.9936	13.063	12.2205	12.5767	12.3984	12.895	12.7773	12.9504	12.9867	12.4989	13.4274	13.0763	13.6299	12.0587	12.1175	13.006	12.637	12.6674	13.0341	12.5558
1728.22	5786.3	13.4794	13.807	14.8768	14.0304	14.5773	14.6377	11.1085	12.5398	14.8197	15.0496	14.8424	15.2566	16.3488	15.2972	13.8347	15.5195	14.7171	13.8753	13.7734	12.7183	13.1059	13.9374	14.1465	12.9476	13.0172	12.3662	12.5422	12.7034	12.8495	13.9541	13.0836	13.4423	13.2822	13.7902	13.6746	13.8395	13.9	13.3936	14.379	13.9853	14.5464	12.9366	12.9965	13.9188	13.5224	13.5688	13.9473	13.4538
1730.15	5779.85	14.5554	14.9053	16.0676	15.0638	15.6791	15.6985	12.0778	13.5548	15.9527	16.1719	15.9813	16.3907	17.5066	16.4165	14.9015	16.6291	15.8114	14.9111	14.821	13.7464	14.1393	15.0131	15.2388	13.9958	14.1021	13.3525	13.5674	13.7294	13.8777	14.9962	14.0841	14.4579	14.3405	14.8298	14.7486	14.8768	14.9679	14.4248	15.4841	15.0558	15.6042	13.9644	14.0564	15.0103	14.5913	14.6379	14.9742	14.4718
1732.08	5773.42	15.335	15.7174	16.9894	15.8794	16.5389	16.4402	12.8252	14.3526	16.8266	16.9787	16.8665	17.2169	18.4045	17.2719	15.7383	17.5284	16.6645	15.6896	15.5947	14.536	14.9433	15.8407	16.0992	14.7923	14.91	14.1583	14.3749	14.5428	14.6836	15.8107	14.8647	15.2249	15.1759	15.6293	15.5846	15.73	15.8337	15.2669	16.4052	15.8729	16.4906	14.7466	14.8978	15.8695	15.4615	15.4774	15.8273	15.2841
1734.01	5766.99	16.6702	16.9007	18.2893	17.0708	17.8338	17.6596	14.053	15.5345	17.959	18.164	18.0986	18.5279	19.7026	18.5514	16.7968	18.6731	17.9426	17.2799	16.7582	15.7898	15.9343	17.3104	17.4081	16.0873	16.1123	15.2743	15.6366	15.6709	15.9198	17.0151	15.9114	16.4191	16.3503	16.8669	16.8654	16.9044	17.0557	16.3208	17.6667	17.0649	17.6854	15.8464	16.1257	17.1661	16.7061	16.6701	16.9467	16.4806
1735.93	5760.59	17.7229	18.0032	19.2175	18.1735	18.8909	18.834	14.9845	16.5001	19.0914	19.308	19.1436	19.6392	20.7595	19.6682	17.9014	19.6764	18.9602	18.1368	17.8223	16.7744	16.9888	18.2215	18.385	17.1018	17.0413	16.2251	16.6456	16.7002	16.9533	18.1075	17.0053	17.5406	17.3728	17.9806	17.8746	17.9561	18.0949	17.3965	18.6309	18.1454	18.7149	16.9301	17.0855	18.1576	17.6879	17.6791	18.0006	17.5548
1737.86	5754.19	18.5562	18.9012	20.1662	19.07	19.773	19.7123	15.7598	17.3534	20.0257	20.2349	20.0688	20.546	21.6769	20.5636	18.8249	20.6657	19.8569	18.8551	18.6609	17.6018	17.9053	19.0136	19.2481	17.9219	17.8721	17.0968	17.4612	17.5633	17.791	18.9879	17.922	18.4187	18.2294	18.8501	18.7231	18.8592	18.9843	18.3129	19.5051	19.0211	19.6344	17.8162	17.9508	19.0102	18.55	18.574	18.9151	18.4199
1739.79	5747.81	19.5778	19.8747	21.2653	20.0569	20.7997	20.7119	16.7005	18.2916	20.9958	21.1996	21.0754	21.6069	22.7045	21.594	19.7509	21.6442	20.8569	19.9204	19.6146	18.5757	18.8064	20.0639	20.2568	18.9126	18.9264	18.0354	18.4395	18.493	18.7742	19.9752	18.8531	19.4134	19.1937	19.8432	19.7291	19.8436	19.9906	19.2444	20.4657	20.0259	20.6093	18.7743	18.9661	20.029	19.5398	19.5692	19.8768	19.4096
1741.72	5741.45	20.6206	20.9359	22.3128	21.1067	21.8524	21.7937	17.6761	19.2917	22.0864	22.2561	22.1427	22.6784	23.7761	22.6686	20.8083	22.6908	21.8679	20.9	20.6332	19.5768	19.8623	21.0763	21.2828	19.9244	19.9404	19.0191	19.4765	19.4993	19.791	21.0253	19.8914	20.473	20.2161	20.9001	20.7544	20.84	21.0296	20.2647	21.473	21.0536	21.6453	19.7989	19.9708	21.0578	20.5549	20.5762	20.895	20.4253
1743.65	5735.1	21.5472	21.8547	23.2698	22.0207	22.7922	22.718	18.544	20.1746	23.0135	23.2102	23.0856	23.6162	24.7357	23.608	21.7047	23.6181	22.7868	21.8175	21.5292	20.4751	20.761	21.9896	22.2099	20.8319	20.8514	19.9027	20.4154	20.391	20.6956	21.9497	20.7808	21.3845	21.1247	21.8479	21.6858	21.7462	21.9594	21.1736	22.3878	21.9589	22.5734	20.6834	20.8823	22.0031	21.4893	21.4938	21.8091	21.338
1745.58	5728.76	22.5721	22.9211	24.3562	23.0303	23.8314	23.7131	19.5048	21.1823	24.0991	24.2869	24.1615	24.664	25.801	24.6711	22.7641	24.6811	23.8102	22.7718	22.5438	21.4762	21.8379	22.9797	23.2469	21.8597	21.846	20.8779	21.3967	21.4176	21.7036	22.9656	21.7723	22.3557	22.1683	22.8497	22.7035	22.7546	22.9806	22.1953	23.421	22.955	23.6075	21.6827	21.8886	23.028	22.5231	22.5327	22.8186	22.3395
1747.51	5722.44	23.4164	23.7657	25.3456	23.8603	24.7171	24.4827	20.3287	22.027	24.9694	25.1451	25.0547	25.5587	26.6884	25.5427	23.5947	25.5777	24.6907	23.6336	23.3492	22.3068	22.6652	23.8821	24.1397	22.7257	22.728	21.7197	22.2437	22.2615	22.5594	23.7987	22.5888	23.1498	23.0495	23.6665	23.5839	23.6208	23.8578	23.0394	24.3767	23.82	24.4882	22.5085	22.7779	23.9177	23.3812	23.4113	23.6907	23.2068
1749.44	5716.13	24.4151	24.6979	26.374	24.8092	25.6914	25.4623	21.248	22.9493	25.892	26.0524	26.0143	26.5918	27.6667	26.5151	24.4765	26.5003	25.6575	24.6799	24.258	23.2844	23.4954	24.9233	25.1154	23.6782	23.7183	22.6457	23.1972	23.1707	23.5102	24.7363	23.4691	24.0848	23.974	24.624	24.5704	24.5759	24.8137	23.9242	25.3512	24.7733	25.4259	23.4412	23.735	24.8871	24.3419	24.3344	24.6272	24.1577
1751.36	5709.83	25.3264	25.5189	27.0461	25.7252	26.5528	26.5046	22.049	23.7216	26.6642	26.9074	26.8065	27.4774	28.498	27.4182	25.2444	27.2645	26.5102	25.6067	25.1055	24.1357	24.1693	25.7671	25.9257	24.5424	24.5614	23.4839	24.0683	23.9911	24.3744	25.6255	24.2745	24.9985	24.7709	25.5202	25.4621	25.4858	25.6719	24.7476	26.1538	25.6432	26.2551	24.3052	24.5651	25.7593	25.1949	25.1972	25.5102	25.062
1753.29	5703.55	26.2721	26.5367	27.854	26.7461	27.5175	27.5627	22.9552	24.6547	27.7092	27.9194	27.7762	28.44	29.4482	28.4317	26.3077	28.2189	27.4435	26.3996	26.1113	25.0496	25.1881	26.6085	26.8295	25.4654	25.4113	24.4047	24.9908	24.9817	25.3204	26.6256	25.2947	26.0064	25.7389	26.5046	26.3869	26.465	26.6218	25.7663	27.0958	26.6421	27.2172	25.28	25.4639	26.683	26.1306	26.1654	26.5057	26.0358
1755.22	5697.28	26.9955	27.3071	28.6273	27.5248	28.298	28.282	23.6887	25.4281	28.5176	28.7034	28.5639	29.2121	30.2309	29.2011	27.123	29.0444	28.2034	27.1009	26.8535	25.7946	26.0049	27.3522	27.6069	26.2098	26.1177	25.182	25.748	25.7597	26.0775	27.4057	26.087	26.7751	26.5138	27.2919	27.1511	27.2493	27.4052	26.57	27.8971	27.4093	28.0213	26.05	26.2336	27.4539	26.8991	26.9418	27.311	26.8251
1757.15	5691.03	27.9503	28.2041	29.5989	28.4173	29.2199	29.1873	24.5923	26.3127	29.3961	29.6297	29.4744	30.1645	31.1622	30.1192	27.9445	29.927	29.1123	28.0676	27.7165	26.6938	26.8174	28.288	28.5335	27.1356	27.054	26.0665	26.6348	26.6067	26.9867	28.3104	26.9329	27.6858	27.4023	28.2119	28.0891	28.1506	28.3188	27.4148	28.75	28.2987	28.912	26.9267	27.1711	28.4037	27.8067	27.859	28.1909	27.7329
1759.08	5684.79	28.7498	29.0507	30.4344	29.2561	30.0365	30.0263	25.3884	27.1135	30.2743	30.4539	30.3198	30.9935	31.9914	30.9673	28.818	30.7465	29.9008	28.8051	28.5388	27.4871	27.6948	29.0577	29.3382	27.9217	27.8407	26.8659	27.4076	27.4455	27.8078	29.1475	27.7802	28.5182	28.2538	29.0036	28.8963	29.0006	29.1662	28.2858	29.5616	29.1381	29.743	27.767	27.973	29.2197	28.644	28.6894	29.0319	28.5645
1761.01	5678.56	29.5035	29.7545	31.2285	29.9915	30.7922	30.7098	26.1172	27.8365	30.9619	31.1543	31.048	31.7549	32.7544	31.7014	29.4922	31.4955	30.6446	29.6059	29.2297	28.2405	28.3343	29.8563	30.1084	28.6663	28.557	27.6225	28.1869	28.1732	28.5512	29.8936	28.4736	29.2539	28.9832	29.75	29.6717	29.7593	29.9306	28.9824	30.3397	29.8514	30.4727	28.4952	28.7319	29.9946	29.4173	29.4539	29.7702	29.3216
1762.94	5672.35	30.3264	30.5106	31.9622	30.8096	31.5931	31.5159	26.8664	28.577	31.6932	31.9394	31.802	32.5572	33.5314	32.4964	30.2109	32.2147	31.4161	30.4127	30.0016	29.0083	28.9853	30.649	30.8814	29.4467	29.3631	28.3904	29.0136	28.9481	29.3358	30.6957	29.2137	30.0755	29.7262	30.5896	30.4887	30.5472	30.7134	29.7247	31.1247	30.6404	31.2197	29.297	29.5151	30.7977	30.188	30.258	30.5663	30.1337
1764.87	5666.15	31.1191	31.391	32.7614	31.6665	32.4196	32.3612	27.6663	29.4026	32.6049	32.7963	32.6622	33.3739	34.3431	33.348	31.149	33.0508	32.2297	31.1029	30.8553	29.8007	29.9203	31.3965	31.6799	30.2452	30.1844	29.1927	29.8139	29.8096	30.1466	31.5373	30.092	30.9066	30.568	31.4369	31.2816	31.3857	31.5404	30.6255	31.9499	31.4955	32.0642	30.1576	30.301	31.5936	30.9943	31.0753	31.4271	30.9645
1766.8	5659.96	31.8191	32.1063	33.5627	32.353	33.1347	32.9925	28.3747	30.1292	33.3141	33.513	33.3898	34.108	35.0524	34.0435	31.8458	33.786	32.9687	31.8044	31.5368	30.5104	30.6239	32.1249	32.4167	30.9632	30.9256	29.9082	30.5114	30.5062	30.8495	32.2354	30.7727	31.5701	31.275	32.136	31.9987	32.0986	32.2628	31.3327	32.6705	32.1969	32.7898	30.8488	31.0252	32.3178	31.713	31.7977	32.1302	31.6702
1768.72	5653.79	32.6732	32.9776	34.5416	33.1431	33.9463	33.7752	29.1985	30.9823	34.1893	34.3652	34.2496	34.9809	35.922	34.877	32.6646	34.6282	33.8178	32.6289	32.3491	31.3398	31.4546	32.9795	33.2829	31.7912	31.7243	30.7122	31.2845	31.3123	31.6724	33.054	31.5919	32.3756	32.1251	32.9452	32.8352	32.8949	33.088	32.122	33.4882	33.0185	33.6104	31.6299	31.8739	33.1631	32.5694	32.6382	32.9097	32.4752
1770.65	5647.63	33.2835	33.5846	35.3247	33.6997	34.528	34.3354	29.8181	31.5886	34.822	34.9757	34.8745	35.5535	36.5838	35.4956	33.2401	35.2798	34.4458	33.2639	32.8781	31.9419	32.0726	33.6452	33.9415	32.3822	32.2912	31.3321	31.8972	31.8899	32.3011	33.6698	32.1847	32.9518	32.7666	33.5178	33.4681	33.4921	33.716	32.7147	34.1452	33.6204	34.2344	32.1297	32.5549	33.8275	33.2139	33.2835	33.5069	33.1046
1772.58	5641.49	33.9468	34.0566	35.8682	34.2693	35.1308	34.9195	30.3867	32.0941	35.224	35.5217	35.3741	36.1121	37.1635	36.0518	33.5876	35.7642	35.013	33.9834	33.3643	32.5339	32.3423	34.3254	34.5222	32.9745	32.9209	31.9275	32.562	32.3664	32.903	34.2529	32.6078	33.5357	33.2632	34.1286	34.1192	34.098	34.2843	33.1325	34.7143	34.1737	34.7506	32.6231	33.1829	34.4818	33.7808	33.867	34.0613	33.696
1774.51	5635.36	34.5655	34.7033	36.241	35.0069	35.8023	35.634	30.9872	32.7021	35.8649	36.1617	35.9883	36.7487	37.7498	36.6991	34.3063	36.3442	35.5928	34.5318	34.065	33.1504	32.9769	34.8555	35.0982	33.6165	33.5359	32.5722	33.1563	33.0337	33.5307	34.9245	33.2892	34.2634	33.9019	34.809	34.7438	34.8071	34.9402	33.8566	35.292	34.8604	35.3957	33.3594	33.75	35.0794	34.3974	34.4558	34.7709	34.3658
1776.44	5629.24	35.2187	35.4098	36.8289	35.735	36.4904	36.336	31.6713	33.3802	36.5674	36.8587	36.6688	37.445	38.3841	37.3786	35.0631	37.0133	36.2361	35.117	34.7736	33.7991	33.7155	35.4627	35.7482	34.273	34.1931	33.2529	33.774	33.7376	34.1899	35.6198	34.0046	34.9756	34.5989	35.4707	35.3956	35.5079	35.6315	34.6038	35.9185	35.5541	36.0819	34.0801	34.375	35.7204	35.0338	35.108	35.4809	35.0486
1778.37	5623.13	35.8011	36.0417	37.4875	36.3491	37.0972	36.9593	32.2667	33.9923	37.2059	37.4857	37.2912	38.0783	38.9695	37.9852	35.7194	37.6279	36.8332	35.6782	35.382	34.3914	34.3901	36.0362	36.3508	34.8717	34.7652	33.8697	34.4083	34.3813	34.7954	36.2393	34.6359	35.5805	35.2217	36.0692	35.9872	36.1178	36.2562	35.2483	36.5711	36.1588	36.7091	34.6915	34.9717	36.3169	35.6383	35.722	36.1027	35.6723
1780.3	5617.04	36.3801	36.5581	38.0727	36.8759	37.628	37.5363	32.7942	34.5212	37.6825	38.0359	37.8041	38.6486	39.51	38.5115	36.1647	38.1397	37.385	36.265	35.8747	34.9501	34.8156	36.5962	36.892	35.443	35.3117	34.4277	35.0303	34.8988	35.3359	36.7808	35.123	36.1053	35.7077	36.6712	36.5536	36.6653	36.7892	35.7271	37.1516	36.6769	37.2383	35.2204	35.5354	36.887	36.1734	36.2846	36.6399	36.2228
1782.23	5610.96	36.9489	37.1382	38.5234	37.4785	38.1823	38.1408	33.3601	35.0847	38.2654	38.5687	38.3671	39.1814	40.0554	39.085	36.7559	38.6765	37.9466	36.7887	36.4399	35.5266	35.3826	37.1329	37.4349	35.98	35.8716	34.9956	35.6139	35.4835	35.8948	37.3668	35.6993	36.6834	36.2606	37.2864	37.1226	37.2527	37.3692	36.3227	37.7276	37.2621	37.8066	35.8302	36.0766	37.4498	36.7223	36.8359	37.2403	36.7978
1784.15	5604.89	37.4566	37.6293	38.992	38.0065	38.7069	38.6267	33.8708	35.5829	38.7398	39.0577	38.8638	39.6953	40.5296	39.5781	37.2487	39.1823	38.4619	37.2899	36.9266	36.0352	35.8312	37.6467	37.9432	36.4859	36.3803	35.5252	36.1197	35.9634	36.4048	37.8813	36.1888	37.1984	36.7545	37.8185	37.6371	37.7839	37.8962	36.8414	38.2371	37.781	38.3277	36.353	36.5731	37.9541	37.2162	37.3276	37.7667	37.3084
1786.08	5598.84	38.0072	38.1591	39.5446	38.5595	39.2546	39.1909	34.4099	36.0911	39.2349	39.602	39.3771	40.2631	41.0598	40.1024	37.7577	39.6868	38.9967	37.8011	37.4551	36.558	36.3079	38.1647	38.4598	36.998	36.8567	36.0606	36.6446	36.4801	36.9392	38.4202	36.6905	37.7357	37.2815	38.3408	38.1702	38.3379	38.4259	37.3611	38.7634	38.3247	38.8534	36.8625	37.118	38.4907	37.7471	37.8544	38.3085	37.8552
1788.01	5592.8	38.6535	38.8998	40.2426	39.2169	39.889	39.8583	35.098	36.7888	40.0011	40.2763	40.08	40.8873	41.7615	40.7709	38.5255	40.3721	39.6503	38.3817	38.1274	37.1992	37.1267	38.7851	39.1233	37.6248	37.427	36.7077	37.3018	37.1904	37.5844	39.0797	37.394	38.3744	37.9792	39.0016	38.7986	38.9828	39.0939	38.0679	39.4606	38.9956	39.5263	37.4916	37.7667	39.1544	38.4243	38.508	38.9586	38.5
1789.94	5586.78	39.1477	39.4448	40.9498	39.6558	40.3832	40.2298	35.6344	37.3511	40.5895	40.7755	40.6319	41.3104	42.3192	41.2695	39.0519	40.9323	40.1718	38.8893	38.5704	37.6965	37.7361	39.3365	39.6851	38.1417	37.9053	37.2192	37.8267	37.7029	38.0899	39.566	37.9148	38.8291	38.5	39.5317	39.3036	39.444	39.6331	38.5826	40.0154	39.4959	40.0601	37.9728	38.3137	39.7211	38.9661	39.0393	39.4317	38.9795
1791.87	5580.76	39.5098	39.638	41.4882	39.9014	40.7522	40.3573	35.9808	37.6294	40.7228	41.0556	40.8845	41.6048	42.635	41.5232	39.1293	41.2246	40.5054	39.333	38.7724	38.0035	37.7826	39.7598	40.0524	38.508	38.3365	37.5632	38.1661	37.8915	38.4365	39.8686	38.1152	39.1309	38.7356	39.852	39.6814	39.7387	39.9476	38.7369	40.2762	39.7616	40.3426	38.2204	38.7237	40.125	39.2835	39.3974	39.6966	39.2797
1793.8	5574.76	39.9283	40.0331	41.7621	40.3716	41.213	40.8291	36.378	37.9973	41.0682	41.445	41.2697	42.0689	42.991	41.9298	39.5436	41.5868	40.9041	39.7252	39.2201	38.4113	38.1214	40.1229	40.4257	38.919	38.7973	37.9881	38.593	38.307	38.8703	40.3173	38.5219	39.6036	39.1467	40.2559	40.1065	40.1929	40.3555	39.1476	40.6404	40.1845	40.7408	38.6349	39.1185	40.5132	39.6762	39.7853	40.1496	39.7227
1795.73	5568.77	40.4203	40.5786	42.1883	40.9219	41.7132	41.4073	36.8625	38.5134	41.606	41.9657	41.7794	42.585	43.4623	42.4398	40.1276	42.0838	41.3876	40.1595	39.7418	38.9117	38.6736	40.5635	40.8894	39.4006	39.2417	38.498	39.1008	38.8639	39.3649	40.8345	39.0618	40.1214	39.6616	40.7662	40.5833	40.7277	40.8601	39.7339	41.1685	40.7005	41.2584	39.1694	39.5922	40.9868	40.17	40.2757	40.6997	40.2375
1797.66	5562.8	40.8614	41.054	42.6244	41.3889	42.1476	41.8851	37.3222	38.9763	42.0914	42.428	42.2399	43.0031	43.9056	42.8876	40.6238	42.5375	41.8364	40.5707	40.1814	39.3611	39.1584	40.9894	41.329	39.8411	39.6777	38.9507	39.53	39.3371	39.8093	41.2888	39.5372	40.5724	40.1182	41.2272	41.015	41.1872	41.3065	40.2255	41.6294	41.1735	41.7175	39.6561	40.0297	41.4374	40.628	40.7344	41.1623	40.6962
1799.59	5556.84	41.2249	41.3946	43.0303	41.7304	42.5179	42.1897	37.6757	39.3498	42.4159	42.7773	42.5966	43.349	44.2483	43.2277	40.9477	42.9016	42.2011	40.9489	40.5014	39.7199	39.4787	41.3716	41.7024	40.2153	40.1013	39.3259	39.9203	39.6834	40.1765	41.638	39.8629	40.8863	40.4659	41.5761	41.3729	41.5405	41.6565	40.5537	42.0006	41.523	42.0825	39.9992	40.3892	41.8048	40.9843	41.0983	41.5034	41.0426
1801.51	5550.89	41.4964	41.5725	43.2335	42.0142	42.7989	42.4612	37.8903	39.5601	42.5579	43.0166	42.8006	43.6439	44.4515	43.4557	41.095	43.1131	42.4207	41.2357	40.7088	39.9728	39.5719	41.6295	41.9278	40.4994	40.3646	39.6077	40.224	39.9156	40.4405	41.8911	40.0626	41.1392	40.6767	41.8503	41.6506	41.8367	41.9103	40.7609	42.2621	41.7729	42.3337	40.25	40.6594	42.0533	41.2033	41.353	41.7914	41.327
1803.44	5544.95	41.9155	42.0039	43.5447	42.4809	43.198	42.9944	38.3046	39.9456	42.9895	43.4404	43.2111	44.0671	44.8334	43.8734	41.5513	43.5057	42.8108	41.5996	41.1336	40.3891	39.9932	41.9784	42.2849	40.8896	40.7406	40.0188	40.6065	40.3522	40.8455	42.3182	40.4976	41.5786	41.0893	42.2659	42.0474	42.276	42.3272	41.2068	42.6577	42.2023	42.7489	40.6958	41.053	42.434	41.6142	41.7506	42.2394	41.769
1805.37	5539.03	42.3175	42.4451	43.8869	42.8959	43.5919	43.484	38.7155	40.3457	43.4416	43.855	43.6271	44.4463	45.2226	44.2835	42.0068	43.9064	43.1982	41.9517	41.5523	40.7954	40.4341	42.3236	42.6536	41.2667	41.1429	40.4223	40.9616	40.7603	41.2473	42.7236	40.9268	41.995	41.5097	42.6554	42.4348	42.6823	42.7459	41.6512	43.0453	42.6261	43.156	41.0862	41.435	42.8226	42.0206	42.1405	42.6557	42.1721
1807.3	5533.11	42.7154	42.8697	44.3041	43.2814	44.0101	43.8541	39.128	40.7734	43.8757	44.2639	44.043	44.8324	45.6232	44.6834	42.432	44.3221	43.5941	42.3351	41.9483	41.1903	40.8734	42.7111	43.0564	41.6565	41.5248	40.8279	41.3336	41.1608	41.6575	43.1195	41.3411	42.3984	41.9335	43.0266	42.8325	43.0733	43.1635	42.0638	43.4283	43.0308	43.563	41.4568	41.8216	43.2177	42.425	42.5291	43.0422	42.552
1809.23	5527.22	42.9993	43.14	44.6224	43.5476	44.3027	44.0749	39.4437	41.0991	44.1518	44.5508	44.3293	45.092	45.9092	44.9533	42.6823	44.6205	43.9023	42.6485	42.1897	41.4744	41.1389	43.0283	43.3619	41.9522	41.7979	41.1262	41.6727	41.4535	41.9633	43.402	41.6148	42.6654	42.2237	43.2979	43.1204	43.3579	43.4635	42.3293	43.7371	43.2981	43.8525	41.6736	42.1306	43.5261	42.7369	42.8245	43.3146	42.8359
1811.16	5521.33	43.2362	43.3038	44.8659	43.7692	44.523	44.28	39.6741	41.304	44.2904	44.7423	44.5252	45.31	46.1129	45.1423	42.8019	44.8138	44.1351	42.9072	42.3499	41.7008	41.2315	43.2765	43.5732	42.1748	42.0628	41.3712	41.9575	41.6371	42.1953	43.6164	41.7855	42.8766	42.3967	43.5548	43.3552	43.5916	43.6761	42.5005	43.9552	43.498	44.0597	41.8924	42.388	43.7763	42.956	43.0752	43.5378	43.0729
1813.09	5515.46	43.5256	43.5898	45.1162	44.115	44.8398	44.6177	39.9601	41.5847	44.5674	45.0268	44.8145	45.6305	46.3603	45.4427	43.1191	45.0866	44.4072	43.1705	42.6681	41.9972	41.5207	43.5488	43.8269	42.4578	42.4145	41.6739	42.2674	41.9627	42.49	43.9254	42.0955	43.1927	42.672	43.8796	43.6435	43.9111	43.9642	42.8151	44.2567	43.7966	44.3564	42.2962	42.6769	44.0454	43.2219	43.3617	43.8659	43.3944
1815.02	5509.59	43.8544	43.9602	45.4436	44.4769	45.1866	44.9845	40.3123	41.9518	44.9448	45.386	45.1802	45.9972	46.6587	45.7878	43.5236	45.441	44.7377	43.4785	43.0281	42.3406	41.9501	43.8709	44.1522	42.8073	42.7562	42.0149	42.6245	42.3595	42.8274	44.2731	42.4773	43.5465	43.0171	44.2382	43.9693	44.2594	44.2967	43.1855	44.618	44.1277	44.7131	42.7078	43.0051	44.3467	43.5435	43.6959	44.2193	43.7382
1816.94	5503.74	44.1002	44.1818	45.7036	44.7074	45.4102	45.253	40.5502	42.165	45.152	45.6267	45.4057	46.2494	46.8826	46.0113	43.7102	45.666	44.9568	43.7268	43.2334	42.584	42.1389	44.102	44.3759	43.0447	42.9692	42.2621	42.8565	42.5926	43.0648	44.4996	42.6983	43.7956	43.2367	44.4935	44.2217	44.4983	44.517	43.4012	44.83	44.3609	44.943	42.9403	43.2525	44.5838	43.7706	43.948	44.4607	43.9735
1818.87	5497.91	44.4122	44.4902	45.9746	45.0078	45.6792	45.5958	40.845	42.4536	45.4565	45.9264	45.7067	46.5244	47.1836	46.3085	43.9969	45.9566	45.2312	44.0165	43.5145	42.8841	42.4254	44.3818	44.6545	43.339	43.2458	42.5592	43.1048	42.8789	43.3623	44.7931	42.9858	44.0919	43.547	44.7594	44.5167	44.7906	44.8066	43.69	45.0881	44.6774	45.2223	43.2216	43.5462	44.8838	44.0738	44.2508	44.7472	44.2574
1820.8	5492.08	44.7438	44.8493	46.3303	45.3239	45.9995	45.9069	41.1991	42.7966	45.8302	46.2719	46.0616	46.8338	47.5196	46.6393	44.3553	46.2969	45.535	44.3243	43.8465	43.198	42.8105	44.6939	44.9758	43.6773	43.5527	42.8758	43.4043	43.2078	43.6938	45.115	43.3293	44.4038	43.9047	45.046	44.8256	45.1017	45.1306	44.0289	45.3964	45.0146	45.533	43.5136	43.8733	45.218	44.4213	44.5678	45.0579	44.5687
1822.73	5486.27	45.0456	45.1908	46.7559	45.5916	46.3305	46.1247	41.518	43.1525	46.2049	46.5997	46.4069	47.1218	47.8523	46.9464	44.7068	46.6438	45.8448	44.6346	44.1566	43.4959	43.2008	44.9979	45.3033	44.013	43.8749	43.1799	43.6916	43.5207	44.0139	45.4113	43.6644	44.6889	44.2497	45.3277	45.1286	45.385	45.4459	44.3521	45.6955	45.2967	45.85	43.7816	44.2088	45.5429	44.7574	44.871	45.3451	44.851
1824.66	5480.47	45.1966	45.2519	46.9385	45.6705	46.4745	46.1641	41.6503	43.2589	46.2545	46.7168	46.4993	47.2312	47.9749	47.0426	44.6931	46.7598	45.973	44.8183	44.2148	43.6163	43.1563	45.1766	45.455	44.1619	44.0993	43.3243	43.8648	43.6003	44.157	45.5207	43.7219	44.7774	44.3409	45.4359	45.2841	45.5015	45.5748	44.3911	45.8275	45.3722	45.9493	43.8431	44.3766	45.7139	44.8792	45.0158	45.4455	44.9758
1826.59	5474.69	45.541	45.6557	47.2987	46.0256	46.8394	46.5299	42.0446	43.6319	46.6818	47.0635	46.8938	47.5936	48.3016	47.4084	45.1238	47.1258	46.3063	45.1425	44.6129	43.9568	43.5799	45.511	45.8031	44.5085	44.4801	43.6606	44.2411	44.0001	44.5132	45.8763	44.1187	45.1277	44.7187	45.8159	45.621	45.8311	45.9312	44.771	46.2117	45.7303	46.2974	44.2045	44.7045	46.0326	45.2076	45.3574	45.7872	45.3283
1828.52	5468.91	45.6559	45.7668	47.5215	46.1169	46.9695	46.6141	42.1641	43.7774	46.8086	47.189	47.0273	47.7421	48.4166	47.5225	45.2222	47.2858	46.4516	45.3164	44.7101	44.0754	43.7038	45.6605	45.954	44.6698	44.6325	43.8098	44.399	44.1498	44.6516	45.9931	44.2394	45.2247	44.847	45.961	45.7658	45.954	46.0748	44.8985	46.3783	45.8391	46.4426	44.3493	44.8586	46.1554	45.3378	45.4972	45.9126	45.4673
1830.45	5463.15	45.6901	45.6375	47.3471	46.1141	46.9205	46.6538	42.119	43.6713	46.6275	47.1517	46.9294	47.7696	48.3495	47.4864	44.9824	47.1799	46.4136	45.3516	44.6015	44.0689	43.4175	45.6702	45.8974	44.6483	44.6311	43.823	44.4353	44.0703	44.64	45.9764	44.1207	45.2202	44.7474	45.9612	45.787	45.976	46.0292	44.7648	46.3279	45.8017	46.3811	44.3094	44.8484	46.1472	45.28	45.4779	45.9094	45.4761
1832.38	5457.4	45.9577	45.9731	47.4743	46.479	47.1863	47.068	42.4061	43.9675	46.9697	47.4345	47.2393	48.0735	48.6048	47.7991	45.389	47.439	46.6629	45.5599	44.9505	44.3657	43.7978	45.8785	46.1193	44.8764	44.8378	44.1056	44.7071	44.4074	44.9145	46.2866	44.4642	45.5549	45.0542	46.2651	46.0479	46.3014	46.3054	45.137	46.6037	46.1127	46.6736	44.6658	45.0734	46.3812	45.5567	45.7339	46.2355	45.7789
1834.3	5451.66	46.2042	46.2655	47.731	46.7536	47.432	47.3603	42.675	44.2455	47.2714	47.6938	47.5222	48.3185	48.8719	48.0632	45.7094	47.7152	46.9028	45.7909	45.2324	44.6324	44.1282	46.1152	46.368	45.1206	45.071	44.366	44.9507	44.6954	45.1668	46.5437	44.7485	45.8183	45.3319	46.5341	46.288	46.5597	46.5619	45.4352	46.8672	46.3661	46.939	44.9648	45.3231	46.6311	45.8272	45.9959	46.4924	46.0376
1836.23	5445.93	46.3473	46.39	47.9094	46.8863	47.5644	47.4822	42.8147	44.3799	47.401	47.8329	47.6628	48.4402	49.0144	48.1967	45.8164	47.8501	47.0248	45.9442	45.3531	44.7749	44.2568	46.2655	46.5134	45.2767	45.2259	44.5193	45.0731	44.8239	45.3139	46.679	44.8763	45.9662	45.4741	46.6761	46.4354	46.6985	46.701	45.5643	46.9863	46.4974	47.0822	45.1321	45.4846	46.7962	45.9682	46.1575	46.6218	46.1872
1838.16	5440.22	46.5231	46.5414	48.1004	47.0563	47.7466	47.6199	42.9893	44.5401	47.5536	48.0138	47.816	48.6197	49.1732	48.3625	45.959	48.0048	47.1733	46.1101	45.5223	44.9282	44.3775	46.4255	46.6713	45.4626	45.3686	44.6908	45.1959	44.9679	45.4826	46.8471	45.0322	46.1551	45.639	46.8239	46.6178	46.8724	46.8668	45.7266	47.0925	46.6765	47.2347	45.3121	45.6525	46.9749	46.1331	46.3347	46.7856	46.3566
1840.09	5434.52	46.8398	46.9415	48.4687	47.3754	48.071	47.9237	43.3383	44.9014	47.9901	48.3508	48.1981	48.9308	49.5198	48.7098	46.3985	48.3569	47.489	46.402	45.9035	45.2511	44.8296	46.7391	47.0008	45.7812	45.6578	44.9997	45.472	45.3286	45.8051	47.1788	45.4238	46.501	46.023	47.1245	46.9326	47.1816	47.2067	46.1197	47.4003	47.0218	47.5554	45.6283	45.9621	47.2971	46.4782	46.6701	47.1019	46.6608
1842.02	5428.82	47.066	47.2325	48.8964	47.5303	48.2961	48.0463	43.5945	45.2016	48.314	48.5983	48.4868	49.1281	49.8052	48.942	46.6822	48.6429	47.7374	46.6544	46.1306	45.4843	45.1769	47.0126	47.2846	46.033	45.8908	45.2283	45.7401	45.5802	46.0374	47.3965	45.6851	46.6845	46.3002	47.3325	47.1622	47.3591	47.4536	46.3704	47.6941	47.2167	47.7823	45.7916	46.2353	47.5603	46.7628	46.9179	47.291	46.8475
1843.95	5423.15	46.9593	46.9676	48.8421	47.3291	48.1817	47.7593	43.4508	45.017	47.9936	48.4164	48.2746	48.9911	49.6767	48.7576	46.2882	48.4712	47.6269	46.6245	45.8715	45.3259	44.7644	46.9674	47.1935	45.9482	45.8566	45.1256	45.7448	45.3495	45.9133	47.2337	45.3964	46.4794	46.0711	47.2377	47.0783	47.2232	47.3056	46.0673	47.619	47.004	47.6029	45.5613	46.1921	47.4968	46.6385	46.8209	47.1276	46.7223
1845.88	5417.48	47.0351	47.0097	48.7379	47.4638	48.2662	47.8942	43.5007	45.0534	48.0105	48.4648	48.3284	49.1013	49.6976	48.833	46.3391	48.493	47.6715	46.6932	45.9588	45.4069	44.7511	47.0195	47.232	45.9989	46.0033	45.224	45.832	45.4248	45.9981	47.3277	45.4626	46.5973	46.1248	47.3691	47.1599	47.3597	47.3649	46.1298	47.6692	47.0934	47.6803	45.719	46.2375	47.5414	46.6856	46.8716	47.2502	46.8484
1847.81	5411.82	47.1389	47.1323	48.7195	47.6584	48.3813	48.1119	43.6108	45.1807	48.1264	48.5872	48.448	49.2578	49.7669	48.9608	46.5199	48.5972	47.7663	46.7818	46.1066	45.5342	44.8863	47.0822	47.3141	46.0791	46.1069	45.3696	45.9375	45.5882	46.1218	47.4814	45.6209	46.7657	46.2621	47.514	47.2761	47.533	47.4947	46.3285	47.7683	47.2546	47.8158	45.9157	46.313	47.622	46.774	46.9677	47.4367	47.0256
1849.73	5406.18	47.2794	47.2746	48.7895	47.8449	48.4898	48.3414	43.7423	45.3192	48.2591	48.7287	48.5777	49.4293	49.8937	49.1117	46.6793	48.7126	47.8763	46.8862	46.252	45.6688	45.0436	47.1671	47.4161	46.1907	46.1656	45.5125	46.0548	45.7653	46.253	47.6362	45.7643	46.928	46.3988	47.6672	47.4064	47.6913	47.6265	46.4848	47.8747	47.4101	47.9394	46.0756	46.4228	47.7335	46.8847	47.1088	47.5927	47.1859
1851.66	5400.55	47.4129	47.4273	48.9023	48.0064	48.5983	48.5545	43.8717	45.4507	48.4318	48.8698	48.7231	49.5493	50.043	49.2611	46.8459	48.8422	47.9863	46.9968	46.3987	45.8183	45.2336	47.2697	47.5267	46.3183	46.237	45.6547	46.1549	45.9369	46.3853	47.7819	45.9174	47.083	46.543	47.7975	47.5351	47.8438	47.7592	46.6455	47.9949	47.5526	48.0744	46.2407	46.5574	47.8716	47.0326	47.2616	47.7383	47.3283
1853.59	5394.93	47.5187	47.5343	48.9814	48.118	48.705	48.6671	43.991	45.5469	48.5555	48.9784	48.8344	49.619	50.1625	49.3653	46.9433	48.941	48.0711	47.0971	46.5008	45.9376	45.3206	47.3698	47.6268	46.4321	46.3161	45.7689	46.233	46.0433	46.4886	47.8945	46.0195	47.2051	46.6551	47.8823	47.6564	47.9573	47.8709	46.7535	48.0958	47.6694	48.1797	46.3395	46.6842	48.0061	47.1502	47.3818	47.8447	47.4387
1855.52	5389.32	47.6192	47.6573	49.1018	48.2264	48.8405	48.7299	44.1098	45.6778	48.6854	49.0996	48.9576	49.7159	50.2907	49.4829	47.0821	49.0571	48.1687	47.2095	46.6384	46.0439	45.4362	47.4891	47.7489	46.5577	46.3996	45.8873	46.3088	46.1453	46.6013	48.0104	46.1415	47.3397	46.7891	47.9805	47.7797	48.0698	47.9939	46.8852	48.1888	47.7984	48.2924	46.4422	46.7983	48.1377	47.2651	47.5012	47.9573	47.5567
1857.45	5383.73	47.6965	47.7414	49.1964	48.2965	48.9379	48.7433	44.2044	45.764	48.769	49.1877	49.0499	49.8049	50.3928	49.5644	47.1688	49.1507	48.2602	47.3151	46.7242	46.1179	45.5182	47.6017	47.8622	46.6521	46.4924	45.9839	46.3807	46.2242	46.6932	48.096	46.2357	47.436	46.8907	48.0449	47.8773	48.1561	48.0824	46.9623	48.2518	47.8751	48.3618	46.5066	46.8836	48.2383	47.3687	47.6089	48.0409	47.6466
1859.38	5378.14	47.7457	47.7868	49.2543	48.36	49.0026	48.7617	44.269	45.8052	48.8095	49.2271	49.1056	49.8594	50.4452	49.61	47.2183	49.2037	48.325	47.3783	46.7641	46.1583	45.5601	47.6611	47.9297	46.7066	46.5917	46.0539	46.4896	46.2981	46.756	48.1626	46.2908	47.4933	46.9475	48.1199	47.9342	48.2302	48.1549	47.0343	48.3317	47.9216	48.4135	46.5334	46.9401	48.3024	47.4518	47.6815	48.1171	47.7166
1861.31	5372.57	47.8244	47.8588	49.3644	48.4457	49.0858	48.8331	44.3553	45.8889	48.868	49.2936	49.1728	49.9543	50.5112	49.6858	47.2869	49.2687	48.4036	47.4505	46.8381	46.2249	45.5934	47.7244	48.004	46.7795	46.7029	46.1392	46.5854	46.362	46.835	48.2454	46.3506	47.5831	47.0062	48.245	48.0131	48.3239	48.2415	47.1207	48.4118	48.0007	48.494	46.6384	47.0177	48.3804	47.5136	47.7587	48.2069	47.8055
1863.24	5367.01	47.9951	48.0709	49.5563	48.6033	49.242	49.0093	44.5441	46.0755	49.0895	49.4649	49.3571	50.1377	50.6731	49.8635	47.5045	49.4414	48.5709	47.6014	47.0296	46.3867	45.8257	47.8869	48.1796	46.9326	46.9083	46.3016	46.734	46.5439	46.9972	48.4163	46.5357	47.7459	47.1901	48.4274	48.1756	48.4765	48.4137	47.3102	48.5835	48.1878	48.6631	46.8619	47.1721	48.5341	47.6597	47.9099	48.3685	47.9657
1865.17	5361.46	48.2289	48.3865	49.8986	48.7692	49.444	49.2013	44.815	46.3513	49.4397	49.7039	49.6312	50.3769	50.9167	50.1005	47.8074	49.7051	48.7991	47.8199	47.2728	46.6124	46.2202	48.1199	48.4404	47.1449	47.1384	46.514	46.9681	46.8041	47.2167	48.6341	46.7995	47.943	47.4567	48.6603	48.3875	48.6418	48.638	47.5504	48.8392	48.4083	48.8937	47.0708	47.3871	48.7483	47.8753	48.1336	48.538	48.1465
1867.09	5355.92	48.2085	48.3509	50.0838	48.6461	49.3877	49.0703	44.8149	46.351	49.4294	49.6789	49.6021	50.3602	50.9348	50.0592	47.6973	49.703	48.7761	47.8584	47.1637	46.6086	46.1585	48.1578	48.4609	47.1351	47.0869	46.4951	46.9971	46.7512	47.2007	48.5966	46.732	47.8608	47.4154	48.6651	48.3787	48.5817	48.6121	47.4645	48.8346	48.3345	48.8637	46.9785	47.4141	48.7625	47.8734	48.1309	48.455	48.1014
1869.02	5350.39	47.9436	47.8974	49.6714	48.3888	49.0768	48.7924	44.4733	45.978	48.9305	49.359	49.2032	50.0448	50.6401	49.7271	47.1443	49.3265	48.4721	47.6394	46.735	46.3347	45.501	47.9162	48.141	46.8604	46.8192	46.2515	46.748	46.3606	46.9298	48.3211	46.3133	47.5776	47.0386	48.3921	48.1435	48.3589	48.3217	47.0696	48.5037	48.021	48.5436	46.6418	47.2015	48.541	47.5743	47.8776	48.2095	47.8747
1870.95	5344.87	47.9792	47.9501	49.5263	48.5689	49.1508	48.9682	44.498	46.0131	48.9731	49.3966	49.2513	50.0998	50.6627	49.7854	47.2847	49.3306	48.4987	47.6187	46.8599	46.376	45.5747	47.8817	48.1236	46.8779	46.8596	46.3146	46.7298	46.4477	46.9747	48.4056	46.4106	47.7088	47.1098	48.4347	48.18	48.4758	48.3789	47.2026	48.5313	48.1274	48.6059	46.7461	47.2017	48.5617	47.5966	47.904	48.3432	47.9782
1872.88	5339.37	48.075	48.1085	49.5854	48.7481	49.2986	49.1335	44.6217	46.1478	49.1361	49.5042	49.3973	50.2278	50.7694	49.9188	47.5306	49.4672	48.6168	47.6869	47.0494	46.4865	45.7981	47.9544	48.2254	46.9833	46.9391	46.443	46.8118	46.6284	47.093	48.5462	46.5929	47.8726	47.2682	48.5286	48.2776	48.6368	48.5158	47.4157	48.6692	48.2869	48.745	46.8984	47.2855	48.6501	47.7056	48.0052	48.5071	48.1241
1874.81	5333.88	48.1103	48.1586	49.6117	48.7971	49.3369	49.1627	44.6496	46.1938	49.1706	49.5417	49.448	50.266	50.813	49.9639	47.5956	49.5117	48.6671	47.718	47.0921	46.5228	45.8557	47.9924	48.2674	47.0217	46.9619	46.4887	46.8753	46.6825	47.1415	48.5993	46.6463	47.9211	47.3146	48.5732	48.3161	48.6929	48.5708	47.4782	48.7324	48.3347	48.7948	46.9358	47.3279	48.6951	47.7402	48.0435	48.5674	48.1839
1876.74	5328.39	48.1306	48.1853	49.647	48.8218	49.3611	49.189	44.6568	46.211	49.1815	49.5705	49.4694	50.2841	50.8345	49.9801	47.6159	49.5252	48.6867	47.7389	47.1137	46.5486	45.8627	48.0098	48.2866	47.034	46.9795	46.5143	46.9444	46.7175	47.1654	48.6281	46.6547	47.9299	47.3178	48.631	48.3344	48.7125	48.599	47.5064	48.78	48.3458	48.8213	46.9565	47.3451	48.7264	47.7662	48.0743	48.593	48.2049
1878.67	5322.92	48.127	48.1868	49.6384	48.8288	49.3711	49.2031	44.6501	46.2002	49.1751	49.5731	49.471	50.2929	50.8299	49.972	47.6185	49.5195	48.6762	47.745	47.1159	46.5486	45.8485	48.0077	48.2848	47.0295	47.0156	46.5222	46.9573	46.74	47.1687	48.6362	46.6416	47.9309	47.3032	48.6855	48.3365	48.7207	48.6156	47.5262	48.7861	48.3498	48.8193	47.0013	47.3399	48.7284	47.764	48.0779	48.6063	48.21
1880.6	5317.46	48.1436	48.2095	49.6477	48.8469	49.3894	49.2273	44.6564	46.2087	49.2002	49.5809	49.4877	50.3185	50.845	49.987	47.6431	49.5313	48.6774	47.7499	47.1256	46.5663	45.8688	48.0075	48.2913	47.0422	47.0625	46.5399	46.968	46.7513	47.186	48.6597	46.6569	47.9454	47.3176	48.697	48.3416	48.7504	48.6431	47.5494	48.7928	48.369	48.8339	47.0448	47.3488	48.7331	47.7792	48.0714	48.6285	48.2292
1882.52	5312.02	48.1577	48.2362	49.6537	48.8578	49.3957	49.2367	44.6704	46.243	49.2286	49.5866	49.5097	50.3246	50.8708	49.9972	47.6693	49.5493	48.6902	47.757	47.1318	46.5892	45.8908	48.0126	48.305	47.055	47.0423	46.5554	46.9927	46.7613	47.2047	48.6763	46.68	47.9616	47.3409	48.7134	48.3512	48.7758	48.6628	47.5744	48.8137	48.3892	48.8594	47.0429	47.3585	48.7411	47.791	48.0618	48.6463	48.2424
1884.45	5306.58	48.1656	48.2351	49.6822	48.8501	49.3852	49.2401	44.687	46.2585	49.2247	49.5832	49.5087	50.3059	50.8898	49.9831	47.641	49.5422	48.6897	47.7576	47.1118	46.5793	45.8719	48.0202	48.3009	47.0539	46.9746	46.5563	46.9849	46.7687	47.2059	48.6686	46.6732	47.9572	47.3369	48.7184	48.3502	48.7722	48.6626	47.5712	48.8116	48.4017	48.8563	47.022	47.375	48.7626	47.7909	48.0755	48.6449	48.2494
1886.38	5301.15	48.2243	48.3428	49.7961	48.9256	49.4609	49.3077	44.7732	46.3393	49.3654	49.6539	49.6128	50.3512	50.9838	50.0634	47.7734	49.6248	48.7642	47.8101	47.2046	46.6469	46.039	48.0761	48.3747	47.1399	47.0235	46.6151	47.0685	46.8801	47.2845	48.7497	46.779	48.0151	47.4302	48.7929	48.4036	48.8315	48.7377	47.6762	48.9193	48.4726	48.9358	47.0924	47.468	48.8474	47.8792	48.1819	48.7076	48.3214
1888.31	5295.74	48.1174	48.2303	49.7905	48.8137	49.3963	49.1366	44.6965	46.2434	49.2564	49.5652	49.5177	50.256	50.9055	49.9643	47.6593	49.5524	48.6895	47.7586	47.0953	46.5503	45.92	48.0128	48.315	47.082	46.952	46.537	47.0343	46.774	47.2073	48.6648	46.6551	47.9125	47.3178	48.7507	48.3208	48.7358	48.6505	47.5684	48.8561	48.3575	48.8458	46.9911	47.418	48.7849	47.7986	48.1213	48.6018	48.2231
1890.24	5290.33	47.9742	48.025	49.62	48.6793	49.2742	48.9775	44.561	46.0633	49.012	49.4206	49.3337	50.1188	50.7495	49.7982	47.4251	49.3772	48.5406	47.6432	46.9224	46.392	45.6408	47.884	48.1633	46.9464	46.8456	46.4083	46.8885	46.5859	47.0667	48.5206	46.4637	47.7925	47.1321	48.6276	48.1984	48.6124	48.5085	47.3742	48.6853	48.2144	48.6948	46.8829	47.2902	48.6609	47.6225	47.9822	48.4754	48.0886
1892.17	5284.94	48.04	48.1545	49.6466	48.7782	49.3398	49.095	44.6388	46.155	49.1519	49.5036	49.4437	50.1852	50.8222	49.8847	47.5997	49.4558	48.6027	47.6715	47.0343	46.4808	45.8272	47.9212	48.2164	47.0168	46.9352	46.4739	46.9154	46.716	47.1303	48.6031	46.6054	47.8885	47.2434	48.6731	48.2546	48.6821	48.5858	47.5086	48.7429	48.3063	48.7906	46.9776	47.3267	48.709	47.6926	48.0363	48.5676	48.1596
1894.1	5279.56	47.9639	48.074	49.6114	48.6997	49.2742	49.0189	44.567	46.076	49.0804	49.4414	49.3668	50.1268	50.7547	49.8078	47.5184	49.39	48.5306	47.6151	46.9474	46.408	45.7506	47.8418	48.1473	46.9662	46.8449	46.4151	46.826	46.6349	47.0677	48.5252	46.539	47.8176	47.1761	48.5793	48.1903	48.6223	48.5165	47.4488	48.67	48.2356	48.724	46.8763	47.2649	48.6443	47.633	47.9615	48.5072	48.1062
1896.03	5274.19	47.8609	47.9311	49.4735	48.6112	49.1664	48.9219	44.4531	45.9562	48.9388	49.3296	49.2384	50.0227	50.6488	49.6801	47.3663	49.2605	48.4072	47.5137	46.816	46.295	45.5575	47.7153	48.0209	46.8268	46.7059	46.3117	46.7158	46.4945	46.9647	48.4178	46.4222	47.7123	47.0607	48.4425	48.085	48.5413	48.408	47.3235	48.5724	48.142	48.6075	46.7422	47.176	48.5465	47.5144	47.8679	48.4191	48.0212
1897.95	5268.83	47.83	47.9146	49.4005	48.6193	49.1439	48.9205	44.4168	45.9479	48.9253	49.3024	49.2269	49.9812	50.6167	49.6513	47.3752	49.2305	48.365	47.463	46.8051	46.2797	45.534	47.6699	47.9741	46.7675	46.702	46.2833	46.7192	46.5119	46.9364	48.407	46.4147	47.693	47.0375	48.4331	48.0438	48.5352	48.3879	47.3349	48.5721	48.1288	48.587	46.7135	47.1462	48.5142	47.4858	47.8553	48.4148	47.9985
1899.88	5263.48	47.7796	47.8846	49.3755	48.586	49.1241	48.8839	44.3812	45.9083	48.9013	49.2675	49.1933	49.9445	50.5627	49.6123	47.3634	49.2004	48.313	47.4152	46.7776	46.2332	45.5065	47.6232	47.9246	46.7362	46.7087	46.2418	46.7122	46.5177	46.9011	48.3758	46.3715	47.6477	46.9906	48.4463	47.9917	48.4917	48.3521	47.3184	48.539	48.0876	48.5546	46.7116	47.094	48.4587	47.4437	47.8107	48.3767	47.9546
1901.81	5258.14	47.7097	47.8197	49.3029	48.5188	49.0613	48.827	44.3186	45.8402	48.8327	49.212	49.1298	49.8855	50.4768	49.543	47.2986	49.1401	48.2462	47.3502	46.7116	46.1658	45.4444	47.5518	47.8531	46.6856	46.7088	46.1764	46.6519	46.4611	46.8468	48.311	46.2969	47.5808	46.9202	48.4079	47.9225	48.4287	48.2886	47.2577	48.4765	48.0277	48.4969	46.6777	47.0111	48.3767	47.3785	47.7351	48.3174	47.8978
1903.74	5252.81	47.6704	47.7828	49.2673	48.4599	49.0008	48.7983	44.2641	45.7954	48.7918	49.1795	49.0876	49.8578	50.4208	49.493	47.2473	49.0871	48.2015	47.2938	46.6626	46.119	45.4011	47.508	47.7937	46.6385	46.6615	46.1207	46.5925	46.4022	46.7948	48.2569	46.2521	47.527	46.8721	48.3473	47.8676	48.3753	48.2413	47.209	48.4264	47.9678	48.4501	46.6465	46.9375	48.3121	47.3144	47.6603	48.2676	47.8416
1905.67	5247.5	47.6558	47.7893	49.2727	48.4164	48.9607	48.7826	44.2354	45.771	48.813	49.1573	49.0882	49.8389	50.4165	49.4739	47.2369	49.0675	48.1876	47.2636	46.6395	46.0876	45.4115	47.5024	47.7624	46.6169	46.5691	46.0829	46.5753	46.3884	46.7661	48.2244	46.2382	47.4875	46.8573	48.3187	47.8283	48.3371	48.2162	47.1944	48.4004	47.9231	48.4263	46.6022	46.9108	48.2824	47.2762	47.6266	48.2237	47.7926
1907.6	5242.19	47.5635	47.6972	49.2006	48.2986	48.8525	48.6822	44.1313	45.6736	48.7264	49.0534	49.0075	49.7085	50.3512	49.3692	47.1181	48.9767	48.1065	47.1782	46.5185	45.9861	45.3325	47.4132	47.6701	46.5269	46.4307	45.9831	46.5009	46.3009	46.681	48.1203	46.1374	47.3822	46.7604	48.2452	47.7266	48.2277	48.124	47.0985	48.3294	47.8204	48.3321	46.4942	46.8539	48.2104	47.1834	47.569	48.1107	47.6895
1909.53	5236.9	47.365	47.4513	49.0016	48.1095	48.6783	48.4807	43.9198	45.4449	48.4731	48.8569	48.7919	49.4882	50.1604	49.1667	46.8575	48.7641	47.9113	47.0082	46.3023	45.786	45.0495	47.2089	47.4726	46.3337	46.2582	45.8074	46.3416	46.0885	46.5017	47.9337	45.9117	47.1922	46.5431	48.062	47.549	48.0644	47.9311	46.8752	48.1478	47.6217	48.128	46.3068	46.707	48.0474	46.9997	47.4374	47.9364	47.5312
1911.46	5231.61	47.2494	47.35	48.8705	48.0472	48.6079	48.3894	43.8198	45.344	48.3723	48.7489	48.702	49.403	50.0454	49.0726	46.7917	48.6612	47.7901	46.8969	46.233	45.69	44.9394	47.0821	47.3614	46.2267	46.1854	45.717	46.2315	46.0009	46.4034	47.846	45.8228	47.1141	46.4395	47.9737	47.4464	47.9926	47.8297	46.7883	48.037	47.5323	48.031	46.2296	46.5864	47.9339	46.901	47.335	47.8648	47.4532
1913.39	5226.34	47.2239	47.3721	48.8734	48.0486	48.6066	48.3856	43.8128	45.352	48.3975	48.7331	48.7169	49.4076	50.034	49.0608	46.8387	48.6628	47.7516	46.8596	46.252	45.6724	44.9912	47.0453	47.3416	46.2119	46.1609	45.6962	46.1612	46.0136	46.3873	47.8254	45.8513	47.1138	46.4436	47.949	47.4227	47.9648	47.8133	46.8141	48.0057	47.5338	48.0221	46.2439	46.5556	47.9074	46.8774	47.2973	47.8503	47.4284
1915.31	5221.08	47.196	47.3991	48.9077	48.0084	48.5767	48.3537	43.7936	45.3674	48.4479	48.7276	48.7393	49.3778	50.0387	49.0405	46.8835	48.6714	47.7204	46.8278	46.245	45.6495	45.0788	47.022	47.3343	46.1929	46.1229	45.6595	46.1033	46.0167	46.3686	47.7955	45.8878	47.0864	46.4673	47.8882	47.3935	47.9191	47.792	46.8254	47.9751	47.5114	48.0105	46.2103	46.5569	47.8882	46.8677	47.284	47.8092	47.3853
1917.24	5215.82	46.963	47.1057	48.7316	47.7312	48.3372	48.0522	43.5585	45.1194	48.1436	48.5019	48.4785	49.1325	49.8141	48.7849	46.5407	48.4309	47.4849	46.643	45.9528	45.4058	44.7256	46.8178	47.1142	45.979	45.879	45.4302	45.9165	45.7412	46.1358	47.5514	45.5957	46.8229	46.2049	47.6398	47.1677	47.6853	47.5403	46.5276	47.732	47.2482	47.7556	45.9006	46.3723	47.6828	46.6232	47.0789	47.5508	47.1516
1919.17	5210.58	46.8525	46.9903	48.5838	47.6199	48.2241	47.946	43.4494	44.9869	48.0391	48.385	48.3727	49.021	49.695	48.677	46.417	48.3004	47.3598	46.5183	45.8541	45.2824	44.575	46.684	46.9778	45.8734	45.7756	45.3053	45.8176	45.6389	46.0247	47.4403	45.4635	46.7051	46.085	47.5493	47.0471	47.5724	47.4094	46.3806	47.6145	47.1266	47.6291	45.7851	46.241	47.5619	46.4949	46.962	47.4285	47.0327
1921.1	5205.35	46.7596	46.955	48.5107	47.5444	48.1554	47.8882	43.3832	44.948	48.0435	48.3209	48.3365	48.938	49.6169	48.6132	46.4226	48.259	47.2899	46.4399	45.8184	45.2337	44.5938	46.6068	46.9139	45.8269	45.7669	45.2424	45.7478	45.5989	45.9622	47.3744	45.4258	46.6357	46.041	47.5101	46.97	47.4997	47.3509	46.3643	47.5657	47.0654	47.5789	45.7695	46.1656	47.4764	46.4331	46.8842	47.3672	46.9594
1923.03	5200.13	46.4604	46.5752	48.192	47.2529	47.8696	47.5885	43.0883	44.611	47.6484	48.003	47.9871	48.6726	49.2883	48.2995	46.0135	47.9357	46.9854	46.1793	45.4819	44.9449	44.1491	46.3296	46.6135	45.5536	45.5391	44.9708	45.4595	45.2719	45.6721	47.0741	45.078	46.3535	45.71	47.219	46.7043	47.2408	47.0603	46.0393	47.262	46.7608	47.2682	45.4699	45.8627	47.1807	46.1358	46.5708	47.1019	46.7027
1924.96	5194.92	46.3555	46.4738	48.0156	47.195	47.7498	47.5489	42.9623	44.4859	47.5453	47.8744	47.8798	48.5911	49.162	48.198	45.9291	47.8018	46.8549	46.0246	45.3916	44.8248	44.056	46.1934	46.455	45.4055	45.3955	44.846	45.3228	45.177	45.5468	46.9735	44.9967	46.2633	45.6072	47.0699	46.5828	47.1527	46.9507	45.965	47.1415	46.6618	47.1554	45.3674	45.6882	47.029	46.0107	46.4193	47.0171	46.6096
1926.89	5189.72	46.2692	46.3987	47.875	47.115	47.6294	47.5001	42.8533	44.3959	47.4754	47.782	47.7955	48.4795	49.0609	48.1027	45.8483	47.6976	46.7518	45.8956	45.3038	44.7247	44.0081	46.0908	46.3231	45.2705	45.2524	44.7413	45.2296	45.0973	45.4431	46.8826	44.9113	46.1666	45.5114	46.9757	46.463	47.0537	46.8528	45.891	47.0468	46.561	47.0628	45.2734	45.577	46.9201	45.9095	46.3245	46.9229	46.5069
1928.82	5184.53	46.1328	46.2649	47.7307	46.9763	47.4848	47.3748	42.7193	44.2611	47.3498	47.6515	47.6704	48.3253	48.9287	47.9732	45.7169	47.5549	46.6077	45.7498	45.1763	44.5801	43.8907	45.9494	46.1729	45.1116	45.1005	44.603	45.0982	44.9838	45.3059	46.7477	44.7658	46.0262	45.3699	46.8654	46.3162	46.913	46.7063	45.7587	46.917	46.4282	46.929	45.1651	45.4496	46.7897	45.7702	46.2056	46.7851	46.3716
1930.74	5179.35	45.9646	46.1097	47.5729	46.8154	47.3384	47.1984	42.5613	44.1052	47.1973	47.4967	47.5246	48.1762	48.7756	47.8216	45.5757	47.4087	46.445	45.5995	45.0259	44.4094	43.7243	45.7869	46.0255	44.9546	44.9555	44.4486	44.934	44.8373	45.1504	46.5893	44.6065	45.8736	45.2126	46.7198	46.163	46.7635	46.5404	45.6121	46.752	46.2722	46.7667	45.0183	45.2941	46.6308	45.6096	46.0517	46.6227	46.2232
1932.67	5174.18	45.7788	45.9331	47.4151	46.6462	47.1734	47.0027	42.3686	43.921	47.0289	47.3129	47.3581	48.0247	48.6077	47.6482	45.4065	47.2439	46.28	45.4324	44.8629	44.2381	43.5316	45.6008	45.8611	44.7886	44.7754	44.2831	44.7476	44.6701	44.9803	46.4174	44.4421	45.7128	45.0489	46.5376	45.9972	46.6077	46.3732	45.4554	46.5787	46.1007	46.5924	44.8503	45.1181	46.456	45.439	45.88	46.4561	46.0618
1934.6	5169.02	45.6072	45.7548	47.2485	46.4739	46.99	46.8385	42.1853	43.7411	46.8642	47.1404	47.1886	47.8535	48.4431	47.4731	45.2234	47.0675	46.1052	45.2524	44.6964	44.0616	43.3575	45.4173	45.6786	44.6287	44.5728	44.1079	44.5648	44.4929	44.8048	46.244	44.2744	45.544	44.8807	46.347	45.8301	46.4319	46.1993	45.2797	46.4103	45.9293	46.4173	44.6694	44.9508	46.2825	45.26	45.7195	46.2873	45.8886
1936.53	5163.87	45.4582	45.6096	47.0936	46.3259	46.8308	46.7109	42.0383	43.6025	46.7296	46.9986	47.0525	47.6885	48.3069	47.3268	45.0782	46.9155	45.9548	45.0927	44.5523	43.9113	43.2292	45.2651	45.5239	44.488	44.402	43.9519	44.4258	44.3432	44.6508	46.0961	44.1271	45.393	44.7332	46.2007	45.6772	46.2806	46.0449	45.1393	46.2633	45.7663	46.2682	44.5028	44.8178	46.1394	45.1191	45.5828	46.1419	45.7377
1938.46	5158.73	45.3491	45.5467	47.0293	46.2186	46.7384	46.6082	41.9413	43.5224	46.6889	46.9103	46.9889	47.5932	48.2313	47.2386	45.0264	46.8346	45.8512	44.9819	44.4828	43.8138	43.1873	45.1647	45.4386	44.3986	44.3064	43.8446	44.3293	44.2637	44.5463	45.999	44.0415	45.2958	44.6541	46.1336	45.5684	46.1759	45.9433	45.0489	46.1653	45.664	46.1692	44.4203	44.7224	46.0506	45.0336	45.5026	46.0293	45.6195
1940.39	5153.61	45.1836	45.4391	46.9604	46.0443	46.6044	46.4044	41.8118	43.4105	46.6074	46.7926	46.8841	47.4596	48.1136	47.1116	44.9336	46.7301	45.7007	44.8584	44.3729	43.6721	43.1033	45.0483	45.3396	44.2898	44.1698	43.6996	44.2008	44.1224	44.4108	45.8592	43.9118	45.1389	44.5351	46.019	45.419	46.0144	45.811	44.9159	46.0357	45.5102	46.0344	44.3116	44.5989	45.9208	44.9109	45.3785	45.8683	45.4614
1942.32	5148.49	44.8306	45.0208	46.6284	45.6686	46.2565	46.0026	41.4615	43.0214	46.1722	46.4335	46.4935	47.1164	47.7571	46.7457	44.4604	46.3615	45.3372	44.5613	43.9765	43.315	42.6205	44.7314	45.0064	43.9587	43.8184	43.3693	43.8851	43.7298	44.0715	45.5063	43.4873	44.7715	44.1457	45.6806	45.0878	45.6656	45.4562	44.5037	45.6897	45.1265	45.6592	43.956	44.2779	45.5944	44.5432	45.0373	45.517	45.1267
1944.25	5143.38	44.6294	44.8007	46.3631	45.4896	46.036	45.8513	41.2267	42.7846	45.9486	46.2033	46.2812	46.9144	47.5413	46.5416	44.2427	46.1263	45.1177	44.3352	43.765	43.1039	42.4068	44.4966	44.764	43.7034	43.5935	43.1634	43.6494	43.5358	43.854	45.3028	43.2802	44.5834	43.9363	45.4644	44.8819	45.4795	45.2353	44.2975	45.4707	44.9329	45.4383	43.7475	44.0362	45.3671	44.3091	44.8074	45.3274	44.9342
1946.18	5138.28	44.445	44.6177	46.1227	45.3337	45.8405	45.7094	41.0307	42.586	45.7632	46.0233	46.0998	46.7219	47.354	46.3609	44.0767	45.9376	44.9344	44.1251	43.5908	42.914	42.2302	44.2969	44.5581	43.4887	43.3897	42.9858	43.4212	43.363	43.6612	45.1202	43.1213	44.4244	43.7577	45.2645	44.6951	45.3169	45.0473	44.1481	45.2643	44.7736	45.2625	43.5776	43.8413	45.1725	44.11	44.6284	45.1647	44.7619
1948.1	5133.2	44.2387	44.4225	45.9033	45.1622	45.6492	45.5224	40.84	42.389	45.5747	45.8255	45.9137	46.5339	47.1624	46.1739	43.9088	45.744	44.7416	43.9136	43.4174	42.7177	42.0419	44.1006	44.3588	43.2917	43.1927	42.7985	43.1932	43.1904	43.464	44.9299	42.9577	44.2457	43.5763	45.0401	44.5043	45.1356	44.855	43.9738	45.0498	44.5938	45.0806	43.381	43.6519	44.9753	43.9235	44.4386	44.9869	44.5849
1950.03	5128.12	44.0277	44.2267	45.7066	44.9687	45.4534	45.3291	40.636	42.1974	45.3896	45.6254	45.7259	46.3444	46.9677	45.9772	43.7308	45.5555	44.5461	43.7087	43.2318	42.5103	41.8586	43.8957	44.1687	43.0983	42.9843	42.6059	42.9856	43.012	43.2562	44.7347	42.7734	44.0551	43.3853	44.8295	44.3065	44.9421	44.6544	43.7862	44.8377	44.4045	44.8798	43.1545	43.4453	44.7756	43.7398	44.2352	44.7941	44.4
1951.96	5123.05	43.8271	44.0449	45.5125	44.7735	45.2579	45.1414	40.4361	42.0149	45.2217	45.4255	45.5464	46.1489	46.7837	45.7822	43.5517	45.368	44.3543	43.512	43.0436	42.3157	41.6923	43.6951	43.981	42.9055	42.7903	42.4085	42.7699	42.8126	43.0558	44.541	42.5877	43.8718	43.1991	44.6351	44.1084	44.7563	44.4634	43.6086	44.6385	44.2246	44.6851	42.9568	43.2447	44.5829	43.5531	44.0415	44.5996	44.2046
1953.89	5117.99	43.5906	43.8127	45.2762	44.5342	45.0243	44.9004	40.2063	41.788	45.0003	45.199	45.3129	45.9145	46.5487	45.5551	43.3131	45.1394	44.1206	43.285	42.8122	42.0882	41.4507	43.4685	43.7521	42.6697	42.582	42.1791	42.5425	42.5524	42.8233	44.3118	42.3553	43.6349	42.976	44.3893	43.877	44.535	44.2391	43.3869	44.4168	44.0014	44.4528	42.7167	43.0181	44.3556	43.3172	43.815	44.3708	43.9673
1955.82	5112.95	43.3478	43.5676	45.0285	44.2997	44.7873	44.6527	39.9635	41.5498	44.7596	44.9544	45.0672	45.6929	46.2999	45.3262	43.0755	44.9035	43.8839	43.0528	42.5774	41.8504	41.2086	43.2395	43.5164	42.4375	42.3816	41.9474	42.3381	42.3265	42.5923	44.0882	42.1041	43.3994	42.7398	44.1813	43.6439	44.3081	44.0094	43.1575	44.202	43.7554	44.2187	42.4709	42.761	44.113	43.0744	43.5636	44.1535	43.7422
1957.75	5107.91	43.1271	43.3534	44.8178	44.0825	44.5603	44.4445	39.7389	41.3478	44.5537	44.7346	44.8516	45.4897	46.0764	45.1144	42.864	44.6863	43.6658	42.8254	42.3655	41.6334	41.0178	43.0208	43.294	42.2139	42.1615	41.7264	42.1183	42.1362	42.3666	43.8699	41.8715	43.1822	42.5094	44.0019	43.4191	44.0846	43.7845	42.9414	43.9781	43.5258	44.0062	42.2752	42.5102	43.8818	42.8625	43.3297	43.9403	43.5344
1959.68	5102.88	42.9106	43.1328	44.5767	43.8586	44.3235	44.237	39.5117	41.1211	44.3356	44.5161	44.627	45.2684	45.853	44.8998	42.634	44.4575	43.444	42.5973	42.1412	41.4126	40.814	42.8041	43.0676	41.9712	41.9427	41.5013	41.8861	41.8921	42.1393	43.6456	41.648	42.9618	42.2834	43.7788	43.1983	43.8609	43.5592	42.7203	43.7538	43.3027	43.7866	42.0738	42.2737	43.6545	42.6339	43.115	43.7122	43.3193
1961.61	5097.86	42.6821	42.9025	44.358	43.6225	44.086	44.0085	39.2752	40.8761	44.1104	44.2842	44.3909	45.047	45.6241	44.6748	42.3986	44.2218	43.2159	42.3596	41.911	41.1799	40.5746	42.5705	42.8321	41.7176	41.7068	41.2698	41.652	41.6448	41.9069	43.4187	41.4143	42.7291	42.0492	43.5371	42.9651	43.6248	43.3222	42.4851	43.5357	43.0723	43.5514	41.8331	42.0262	43.4174	42.3871	42.8723	43.4734	43.081
1963.53	5092.86	42.5118	42.766	44.218	43.4412	43.9066	43.8487	39.1047	40.7304	43.9833	44.1206	44.2496	44.8793	45.4808	44.5105	42.2664	44.0644	43.0563	42.1769	41.7585	41.0074	40.4578	42.3965	42.6655	41.5461	41.4919	41.0934	41.4682	41.4948	41.7308	43.2528	41.2552	42.5531	41.89	43.3771	42.7791	43.4311	43.142	42.3212	43.3695	42.9112	43.379	41.6707	41.8569	43.2458	42.2204	42.6926	43.2871	42.8823
1965.46	5087.86	42.2442	42.505	43.9707	43.1577	43.6308	43.5594	38.8366	40.4825	43.7238	43.8483	43.9959	44.5959	45.2445	44.2408	41.9903	43.8111	42.8089	41.9272	41.4782	40.7489	40.1989	42.1686	42.4164	41.292	41.1985	40.8352	41.18	41.2062	41.4613	42.9778	40.9925	42.2846	41.6313	43.1215	42.521	43.1645	42.8776	42.0609	43.0922	42.6558	43.1189	41.4162	41.6445	43.008	41.9879	42.4533	43.0155	42.6098
1967.39	5082.87	41.8794	42.1019	43.602	42.815	43.2975	43.189	38.4698	40.0981	43.3229	43.4888	43.6143	44.2402	44.8943	43.8885	41.5889	43.4468	42.4688	41.6003	41.1126	40.4035	39.7444	41.8351	42.0686	40.9561	40.8522	40.4965	40.8145	40.8201	41.117	42.6243	40.6337	41.9431	41.2745	42.7328	42.1957	42.8461	42.5325	41.7045	42.723	42.3148	42.7664	41.0425	41.3227	42.6823	41.6555	42.1118	42.6892	42.2904
1969.32	5077.89	41.6222	41.8632	43.3288	42.6021	43.0669	42.9546	38.2341	39.8471	43.0891	43.2635	43.3788	44.0104	44.654	43.653	41.3919	43.2122	42.2362	41.3455	40.8982	40.1553	39.5148	41.5549	41.8268	40.7096	40.6044	40.2533	40.5762	40.5965	40.875	42.3999	40.4147	41.7202	41.0425	42.4673	41.9527	42.6124	42.2949	41.4884	42.4841	42.0683	42.5356	40.7689	41.0504	42.4234	41.3948	41.8575	42.4742	42.0697
1971.25	5072.92	41.3948	41.6547	43.0973	42.3935	42.845	42.7539	38.0106	39.6368	42.8859	43.0524	43.169	43.7933	44.4388	43.4379	41.2032	43.0078	42.0131	41.1173	40.6916	39.9244	39.337	41.3141	41.6116	40.485	40.3695	40.0338	40.375	40.4145	40.6511	42.1924	40.1969	41.5061	40.8259	42.2758	41.7225	42.3923	42.0873	41.2909	42.2815	41.8479	42.3303	40.5552	40.8228	42.1954	41.1633	41.6351	42.2661	41.8513
1973.18	5067.96	41.1341	41.3976	42.8221	42.1369	42.585	42.5061	37.7377	39.3866	42.6371	42.7971	42.913	43.5317	44.1735	43.1857	40.9522	42.7572	41.7459	40.8594	40.4373	39.6665	39.1019	41.0562	41.3573	40.2341	40.1638	39.7767	40.135	40.166	40.3966	41.9418	39.9311	41.2447	40.5659	42.0478	41.459	42.139	41.8344	41.0409	42.0375	41.5989	42.0793	40.3138	40.5638	41.937	40.9002	41.3709	42.0116	41.587
1975.11	5063.02	40.8726	41.1431	42.5736	41.8789	42.3318	42.2575	37.4868	39.1296	42.3857	42.5471	42.654	43.2859	43.9058	42.9388	40.7056	42.5055	41.4893	40.6085	40.1883	39.4101	38.8538	40.8002	41.1048	39.9724	39.9692	39.5196	39.8867	39.9046	40.1435	41.6885	39.6714	40.9867	40.3038	41.8128	41.1968	41.8917	41.5825	40.7884	41.786	41.3475	41.8275	40.0623	40.2782	41.6683	40.642	41.0913	41.7611	41.3251
1977.04	5058.08	40.6084	40.8827	42.3183	41.6098	42.061	42.0004	37.2148	38.8638	42.1209	42.2848	42.3867	43.0404	43.642	42.6797	40.4425	42.2431	41.2275	40.343	39.9219	39.1581	38.5942	40.5491	40.8373	39.6945	39.6874	39.2512	39.6218	39.6464	39.8698	41.4241	39.4017	40.721	40.0358	41.5526	40.9258	41.6287	41.3193	40.5215	41.5298	41.0743	41.5643	39.8277	39.9859	41.3941	40.3775	40.8069	41.4989	41.0556
1978.97	5053.15	40.3668	40.6266	42.0448	41.3522	41.7882	41.7621	36.9435	38.5995	41.8529	42.0283	42.1298	42.7808	43.4019	42.4226	40.1757	41.9829	40.9886	40.0828	39.6541	38.9192	38.3505	40.3179	40.57	39.4169	39.3693	38.99	39.359	39.3848	39.604	41.1639	39.1402	40.4635	39.7765	41.2955	40.6609	41.3634	41.055	40.2648	41.28	40.8167	41.3083	39.5858	39.7338	41.1418	40.1272	40.5537	41.2448	40.7996
1980.89	5048.23	40.1025	40.3579	41.7776	41.0863	41.5214	41.5038	36.6804	38.3288	41.5801	41.7714	41.863	42.4957	43.1526	42.155	39.9129	41.718	40.7395	39.8132	39.3881	38.6461	38.0967	40.0467	40.2981	39.1384	39.0625	38.7216	39.0823	39.1164	39.3351	40.8935	38.8762	40.1914	39.5089	41.0215	40.3857	41.0903	40.7886	40.0022	41.0183	40.5564	41.0534	39.3145	39.4813	40.8819	39.8654	40.2941	40.9823	40.5388
1982.82	5043.31	39.8295	40.1006	41.5252	40.827	41.2729	41.2296	36.4322	38.0781	41.3259	41.5264	41.606	42.2268	42.9076	41.8992	39.674	41.4756	40.4923	39.5619	39.1447	38.3858	37.8467	39.78	40.0546	38.8916	38.7888	38.461	38.8216	38.8674	39.0756	40.6374	38.6258	39.9297	39.2526	40.7595	40.1278	40.8227	40.5282	39.7492	40.7718	40.3103	40.8005	39.0433	39.2482	40.6294	39.6064	40.0516	40.719	40.2754
1984.75	5038.41	39.564	39.8646	41.2922	40.5735	41.027	40.9568	36.1834	37.8449	41.1023	41.2783	41.3636	41.9815	42.671	41.6561	39.4565	41.249	40.244	39.3175	38.9137	38.1342	37.6321	39.5245	39.8263	38.6575	38.5375	38.2048	38.572	38.6307	38.8258	40.3908	38.3827	39.6789	39.0059	40.5066	39.8754	40.5607	40.2742	39.5061	40.5288	40.0591	40.5573	38.7907	39.0142	40.3811	39.3462	39.82	40.4573	40.0056
1986.68	5033.52	39.3	39.6196	41.0643	40.3083	40.7811	40.6937	35.9356	37.6108	40.8765	41.0399	41.115	41.7303	42.4299	41.403	39.2185	41.0181	40.0006	39.0782	38.6716	37.8699	37.4087	39.2701	39.5935	38.4194	38.2903	37.9529	38.3199	38.3676	38.5781	40.1351	38.1281	39.4225	38.7516	40.2649	39.6205	40.3004	40.023	39.2506	40.2758	39.8078	40.3139	38.5319	38.7736	40.1397	39.0854	39.5757	40.1899	39.7413
1988.61	5028.64	39.0337	39.3748	40.8318	40.0391	40.5341	40.4334	35.6834	37.3759	40.6499	40.7849	40.8708	41.4729	42.1893	41.1502	38.9841	40.7802	39.7519	38.8312	38.4236	37.6157	37.1982	39.015	39.354	38.172	38.0405	37.6962	38.049	38.0958	38.3223	39.8732	37.8835	39.1628	38.5055	40.0062	39.3645	40.0409	39.7686	38.9944	40.0102	39.5625	40.0673	38.2753	38.5271	39.8916	38.8291	39.3114	39.9271	39.4786
1990.54	5023.77	38.731	39.083	40.5657	39.7307	40.2416	40.1182	35.3913	37.0957	40.3689	40.4933	40.584	41.1767	41.9098	40.8641	38.6973	40.505	39.4671	38.5639	38.131	37.3316	36.9144	38.7452	39.082	37.9083	37.7467	37.4002	37.7299	37.7852	38.0245	39.5675	37.6077	38.8659	38.2229	39.6859	39.0769	39.7445	39.4763	38.7026	39.7063	39.2705	39.7777	37.981	38.2416	39.6053	38.557	39.0318	39.6317	39.1771
1992.47	5018.9	38.3499	38.6566	40.1537	39.3509	39.8577	39.7333	35.0079	36.6849	39.9208	40.1106	40.1645	40.795	41.5155	40.4774	38.2534	40.0997	39.0877	38.2107	37.7319	36.9483	36.4518	38.3877	38.6944	37.5349	37.3699	37.0177	37.3531	37.3825	37.6425	39.1811	37.2211	38.4847	37.829	39.2632	38.7067	39.3737	39.0998	38.3058	39.3277	38.8952	39.3935	37.567	37.872	39.228	38.1948	38.6605	39.2666	38.8178
1994.4	5014.05	38.118	38.43	39.8705	39.1406	39.6187	39.5387	34.7548	36.4286	39.6852	39.8628	39.925	40.5587	41.2728	40.2485	38.0525	39.86	38.8677	37.9507	37.514	36.7194	36.2626	38.1227	38.4372	37.2648	37.1315	36.7691	37.1299	37.1624	37.4007	38.9593	37.0032	38.2567	37.5991	39.032	38.4518	39.1345	38.8639	38.095	39.1142	38.6645	39.1716	37.3166	37.6117	38.962	37.9587	38.3993	39.0399	38.5864
1996.32	5009.21	37.873	38.1994	39.6117	38.8975	39.3731	39.3111	34.5091	36.1889	39.4548	39.6148	39.6866	40.3058	41.024	40.0101	37.8362	39.6352	38.6376	37.7001	37.2804	36.4912	36.0571	37.8645	38.194	37.008	36.9261	36.5174	36.8988	36.943	37.1563	38.7178	36.7536	38.0064	37.3493	38.8193	38.1891	38.8773	38.6158	37.8646	38.8773	38.4123	38.9377	37.0946	37.3495	38.702	37.7003	38.1417	38.7964	38.3248
1998.25	5004.37	37.5935	37.9257	39.3309	38.6168	39.0993	39.0438	34.2497	35.9288	39.1817	39.3522	39.4062	40.034	40.7394	39.7389	37.5691	39.373	38.3806	37.4347	37.0105	36.235	35.7774	37.5918	37.9248	36.7339	36.7131	36.2393	36.6311	36.6819	36.8796	38.4404	36.4702	37.7267	37.0695	38.5561	37.9113	38.5912	38.3438	37.5927	38.606	38.1415	38.6638	36.8498	37.0435	38.417	37.4054	37.8559	38.52	38.0428
2000.18	4999.54	37.309	37.6381	39.051	38.3269	38.8101	38.7658	33.9604	35.6433	38.9044	39.0722	39.115	39.7657	40.4451	39.4552	37.288	39.0991	38.1044	37.1577	36.7293	35.9546	35.4996	37.3142	37.6398	36.4355	36.4321	35.9509	36.3428	36.3934	36.595	38.1543	36.1822	37.435	36.7821	38.2642	37.6215	38.2983	38.0558	37.3064	38.3276	37.8621	38.377	36.5791	36.7196	38.1134	37.1189	37.5406	38.2313	37.7613
2002.11	4994.73	37.0633	37.3839	38.7942	38.0606	38.5395	38.5317	33.6817	35.3803	38.6592	38.8079	38.8572	39.5091	40.1933	39.1937	37.0267	38.8425	37.8428	36.898	36.4641	35.6877	35.2713	37.0664	37.3691	36.1735	36.1114	35.6788	36.0732	36.1313	36.3346	37.8902	35.9237	37.167	36.5159	37.995	37.3547	38.0335	37.7905	37.0417	38.0683	37.5921	38.1214	36.3179	36.452	37.8413	36.8643	37.2644	37.9651	37.4971
2004.04	4989.92	36.804	37.1137	38.5111	37.7824	38.2559	38.2686	33.3987	35.1093	38.3881	38.53	38.5865	39.2198	39.9406	38.9185	36.7463	38.5717	37.5791	36.6267	36.1868	35.4051	35.0088	36.8056	37.0884	35.9048	35.795	35.3963	35.7942	35.8409	36.0568	37.6116	35.6542	36.89	36.2373	37.7195	37.0767	37.7486	37.5134	36.7609	37.8018	37.3079	37.8563	36.0487	36.22	37.572	36.5915	37.0141	37.6833	37.2071
2005.97	4985.12	36.5302	36.8468	38.2526	37.5154	37.9987	37.9973	33.1295	34.8481	38.1253	38.2624	38.3248	38.9405	39.6898	38.6593	36.4983	38.3225	37.3238	36.3707	35.94	35.138	34.755	36.5397	36.8344	35.6463	35.5229	35.1253	35.5292	35.5805	35.7934	37.3416	35.3992	36.625	35.9764	37.4564	36.8091	37.4665	37.2447	36.4927	37.5397	37.0423	37.5926	35.7957	35.9856	37.3154	36.3471	36.7744	37.411	36.9289
2007.9	4980.33	36.2207	36.5535	37.9705	37.2213	37.7258	37.695	32.8371	34.5597	37.8301	37.9769	38.0355	38.6474	39.4047	38.3783	36.2262	38.0531	37.0388	36.1022	35.6669	34.8641	34.4852	36.249	36.5698	35.3779	35.2338	34.8349	35.2456	35.3	35.5116	37.0498	35.1169	36.3359	35.6926	37.1645	36.5208	37.1711	36.9535	36.1972	37.2487	36.7613	37.3096	35.5133	35.703	37.0317	36.0782	36.5041	37.1192	36.6327
2009.83	4975.55	35.9428	36.2902	37.7001	36.9544	37.467	37.4316	32.5834	34.3038	37.5608	37.7138	37.7663	38.3815	39.1415	38.119	35.9758	37.7997	36.7842	35.8512	35.4137	34.6158	34.251	35.9847	36.3202	35.1168	34.9747	34.5629	34.9739	35.0423	35.2434	36.7798	34.8584	36.0675	35.4333	36.8847	36.2494	36.9002	36.6844	35.9308	36.9789	36.503	37.0532	35.2309	35.4428	36.7599	35.8035	36.2392	36.8499	36.3654
2011.76	4970.78	35.6793	36.0348	37.4385	36.6878	37.205	37.1788	32.3335	34.0614	37.2953	37.4627	37.5023	38.1187	38.8848	37.8589	35.7296	37.554	36.5371	35.597	35.1665	34.3588	34.0059	35.7333	36.0659	34.8551	34.714	34.29	34.6884	34.7717	34.9741	36.5063	34.6095	35.8045	35.1801	36.6073	35.9909	36.6296	36.4129	35.669	36.7098	36.2528	36.7938	34.9611	35.1877	36.4908	35.5239	35.9742	36.5777	36.0976
2013.68	4966.02	35.4562	35.8334	37.2315	36.4508	36.9802	36.95	32.1203	33.8564	37.0994	37.2554	37.2921	37.8947	38.6752	37.6407	35.5395	37.3546	36.3256	35.3778	34.9611	34.1389	33.8349	35.5066	35.8526	34.6352	34.4732	34.0542	34.4594	34.5404	34.749	36.2763	34.4037	35.571	34.9716	36.3636	35.7678	36.3864	36.1837	35.4463	36.4898	36.021	36.5731	34.7296	34.9626	36.2612	35.2985	35.7434	36.3348	35.8557
2015.61	4961.27	35.1668	35.5492	36.9669	36.1429	36.6963	36.6469	31.8536	33.5691	36.8225	36.9792	37.0123	37.6067	38.396	37.3557	35.2525	37.0886	36.0422	35.1195	34.6797	33.8529	33.5771	35.2281	35.5857	34.3753	34.2015	33.7654	34.1966	34.2499	34.467	35.9868	34.1117	35.2731	34.6834	36.0937	35.4784	36.0781	35.8962	35.1502	36.2165	35.7174	36.2947	34.4388	34.6925	35.9786	35.0171	35.462	36.0316	35.5512
2017.54	4956.53	34.8535	35.2109	36.6395	35.8193	36.3839	36.3287	31.54	33.2368	36.4795	36.6617	36.6778	37.2892	38.0749	37.037	34.9071	36.7674	35.725	34.8344	34.365	33.5374	33.245	34.931	35.2774	34.0676	33.9029	33.4447	33.8906	33.9247	34.1551	35.6662	33.7828	34.9544	34.36	35.7776	35.1625	35.7535	35.583	34.8261	35.9102	35.3999	35.9874	34.1486	34.3822	35.668	34.7063	35.1493	35.7193	35.2317
2019.47	4951.79	34.5962	34.9476	36.3433	35.5647	36.1188	36.0869	31.2717	32.9735	36.2144	36.4004	36.4037	37.0183	37.808	36.7761	34.6573	36.5104	35.4711	34.5686	34.1157	33.2853	33.0025	34.675	35.0133	33.7925	33.6716	33.1705	33.6203	33.6745	33.8939	35.4049	33.538	34.6958	34.1038	35.4989	34.8917	35.4865	35.317	34.5748	35.6516	35.1557	35.7295	33.8997	34.0969	35.3881	34.4555	34.8728	35.4604	34.9664
2021.4	4947.07	34.367	34.7231	36.1102	35.3272	35.882	35.8656	31.0448	32.7454	35.9853	36.1748	36.1676	36.7852	37.5704	36.5467	34.4428	36.29	35.2407	34.336	33.9	33.0579	32.7967	34.4505	34.7797	33.5614	33.4469	32.9246	33.3859	33.4488	33.6612	35.1694	33.3123	34.4611	33.8701	35.2618	34.6461	35.2433	35.0785	34.3417	35.416	34.9209	35.4871	33.6585	33.8413	35.1338	34.2344	34.6215	35.2198	34.7278
2023.33	4942.35	34.1088	34.4625	35.844	35.0566	35.6153	35.6131	30.7755	32.4825	35.7202	35.9185	35.9031	36.5227	37.311	36.2886	34.1803	36.0308	34.9872	34.0815	33.6448	32.7955	32.5389	34.1878	34.5157	33.2952	33.1587	32.6538	33.123	33.1871	33.3967	34.9013	33.0489	34.1924	33.6057	35.0079	34.3809	34.9782	34.8185	34.0719	35.1422	34.6432	35.2264	33.4018	33.5789	34.8633	33.968	34.3565	34.9473	34.4588
2025.26	4937.65	33.8646	34.2146	35.5819	34.8035	35.3634	35.3701	30.5204	32.2403	35.4695	35.6762	35.6515	36.2679	37.0699	36.0442	33.9371	35.789	34.7637	33.8408	33.4044	32.5518	32.3076	33.9407	34.2707	33.0475	32.9186	32.3981	32.8721	32.9341	33.1482	34.6501	32.8087	33.941	33.361	34.7577	34.1334	34.7192	34.5694	33.8228	34.8943	34.3964	34.9868	33.1622	33.342	34.6126	33.7089	34.1051	34.6893	34.2037
2027.19	4932.95	33.6003	33.954	35.3256	34.5394	35.1084	35.1117	30.2714	31.9838	35.2118	35.4196	35.3897	36.0079	36.8118	35.7906	33.6886	35.5433	34.52	33.5944	33.1623	32.2958	32.0563	33.6857	34.0214	32.7938	32.6572	32.1318	32.6105	32.6625	32.8901	34.3874	32.556	33.6771	33.1036	34.4879	33.8714	34.445	34.3051	33.5564	34.6384	34.1326	34.7234	32.9067	33.0917	34.3473	33.4464	33.8402	34.4201	33.9351
2029.11	4928.26	33.3575	33.7159	35.0834	34.2931	34.8675	34.8724	30.0314	31.7362	34.9841	35.185	35.1479	35.7676	36.5731	35.5541	33.4593	35.3161	34.2966	33.3653	32.9345	32.0657	31.834	33.4533	33.793	32.5487	32.3955	31.8819	32.3645	32.4204	32.6468	34.1383	32.3183	33.4313	32.8649	34.2318	33.6248	34.1861	34.0575	33.3051	34.3937	33.8985	34.4815	32.6711	32.8561	34.1031	33.2123	33.6038	34.1695	33.6848
2031.04	4923.58	33.1061	33.4656	34.8289	34.0347	34.6136	34.6162	29.7761	31.4856	34.7401	34.9334	34.8949	35.5111	36.3293	35.3053	33.2139	35.0774	34.0537	33.1231	32.6943	31.83	31.6168	33.2069	33.5524	32.3026	32.1416	31.624	32.1022	32.1751	32.3891	33.8759	32.0733	33.1795	32.6181	33.9659	33.3681	33.9221	33.7907	33.0499	34.1429	33.6577	34.2308	32.4237	32.6171	33.8513	32.9826	33.3625	33.9102	33.4296
2032.97	4918.91	32.8658	33.2298	34.5906	33.7904	34.3773	34.3861	29.5517	31.267	34.5122	34.6925	34.6569	35.2718	36.0956	35.0743	32.9884	34.8509	33.8111	32.8997	32.4755	31.6081	31.4111	32.9806	33.3289	32.0847	31.9096	31.3775	31.8594	31.9279	32.1486	33.6336	31.849	32.943	32.3898	33.7124	33.1299	33.6712	33.5455	32.8104	33.9016	33.4088	33.9997	32.1816	32.3899	33.6077	32.76	33.1212	33.662	33.1866
2034.9	4914.24	32.6199	32.9885	34.3487	33.5383	34.1311	34.1491	29.3185	31.0246	34.2742	34.4553	34.4125	35.0262	35.8527	34.8365	32.7536	34.6173	33.5635	32.6669	32.2522	31.3764	31.1895	32.7478	33.0989	31.8357	31.6529	31.1235	31.6222	31.6847	31.9082	33.3894	31.6155	32.6934	32.1487	33.4675	32.8868	33.4082	33.2955	32.5581	33.6574	33.1526	33.754	31.9284	32.1452	33.358	32.5198	32.8768	33.4054	32.9285
2036.83	4909.59	32.4026	32.7764	34.131	33.3111	33.9073	33.9329	29.1015	30.8085	34.0597	34.258	34.1938	34.8025	35.6419	34.6206	32.5447	34.4092	33.3444	32.4549	32.05	31.1583	30.9994	32.5331	32.8916	31.6168	31.4339	30.8961	31.4056	31.4804	31.6913	33.1692	31.3957	32.467	31.9295	33.2537	32.6682	33.1718	33.07	32.3322	33.4366	32.9247	33.5299	31.7108	31.9185	33.1349	32.3016	32.6637	33.1693	32.6905
2038.76	4904.95	32.1778	32.5604	33.908	33.0708	33.6771	33.7056	28.8805	30.604	33.8416	34.0368	33.9693	34.5737	35.4258	34.3989	32.3332	34.1996	33.1239	32.239	31.8413	30.9368	30.8162	32.3212	32.6797	31.4158	31.2243	30.6633	31.1684	31.2495	31.4644	32.9353	31.1773	32.2386	31.7096	33.0215	32.4421	32.9277	32.8432	32.1048	33.201	32.6964	33.311	31.4892	31.6904	32.9028	32.0745	32.4382	32.9254	32.4473
2040.69	4900.31	31.9363	32.3124	33.6697	32.816	33.4334	33.4492	28.6302	30.3478	33.584	33.774	33.7187	34.3325	35.1842	34.1552	32.082	33.9625	32.8994	32.0184	31.6105	30.7048	30.5782	32.1032	32.4483	31.1906	30.9844	30.4135	30.9132	30.9888	31.2239	32.6796	30.9473	31.9945	31.4727	32.7493	32.205	32.6719	32.5997	31.854	32.9548	32.4638	33.0664	31.253	31.4451	32.6605	31.8341	32.2017	32.673	32.1972
2042.62	4895.68	31.6961	32.062	33.4184	32.5681	33.1877	33.2122	28.3874	30.0862	33.3324	33.5151	33.4659	34.0877	34.9435	33.915	31.8332	33.7151	32.6693	31.7841	31.3769	30.4587	30.3366	31.8654	32.2077	30.9456	30.7245	30.1614	30.6723	30.7368	30.9771	32.4333	30.7121	31.7483	31.2335	32.4783	31.9634	32.4136	32.3533	31.6015	32.7118	32.2131	32.815	31.0068	31.1982	32.4095	31.5925	31.9604	32.4235	31.9476
2044.54	4891.06	31.4978	31.8584	33.1967	32.3579	32.979	33.0124	28.1944	29.8994	33.1253	33.3143	33.2505	33.8698	34.7446	33.7155	31.6383	33.5143	32.4799	31.5799	31.1863	30.2517	30.1463	31.651	32.0082	30.7336	30.5003	29.9437	30.4589	30.5334	30.7655	32.2239	30.5109	31.5429	31.0281	32.2769	31.7527	32.1947	32.145	31.3906	32.5089	32.0005	32.6201	30.7931	31.0063	32.1947	31.3873	31.7492	32.2052	31.7257
2046.47	4886.45	31.2758	31.6352	32.9651	32.1302	32.7554	32.7913	27.9674	29.6892	32.8953	33.1085	33.0217	33.6374	34.5221	33.5013	31.4255	33.2986	32.2711	31.3637	30.9843	30.0356	29.9477	31.4233	31.7986	30.5096	30.2796	29.7113	30.2341	30.3063	30.5411	31.9979	30.2924	31.3182	30.8095	32.0442	31.5279	31.9675	31.9149	31.1625	32.2877	31.7827	32.3973	30.5813	30.7992	31.9708	31.1744	31.5235	31.9756	31.4914
2048.4	4881.85	31.0654	31.4303	32.7582	31.9206	32.5496	32.5777	27.7714	29.4974	32.6904	32.9124	32.8126	33.4415	34.3111	33.303	31.2326	33.1038	32.0747	31.167	30.8024	29.8389	29.7599	31.2299	31.6108	30.2961	30.0938	29.4993	30.0406	30.1125	30.3381	31.7949	30.0867	31.1115	30.6079	31.8337	31.3257	31.7574	31.6989	30.9514	32.0827	31.5886	32.1897	30.3712	30.5857	31.7573	30.9835	31.3117	31.7651	31.2793
2050.33	4877.26	30.852	31.2182	32.5544	31.6988	32.3346	32.3726	27.5773	29.2866	32.4747	32.696	32.5926	33.2366	34.097	33.0911	31.023	32.8969	31.8594	30.9602	30.6032	29.6379	29.5627	31.0382	31.4085	30.0762	29.8799	29.2787	29.8325	29.9017	30.1246	31.5801	29.8675	30.8908	30.3908	31.6257	31.1119	31.5288	31.4797	30.7312	31.8745	31.375	31.9729	30.1557	30.358	31.5342	30.7678	31.0899	31.5409	31.0633
2052.26	4872.68	30.6657	31.0281	32.3441	31.4946	32.1325	32.1831	27.3755	29.0849	32.2789	32.4918	32.3902	33.0306	33.9072	32.8996	30.8275	32.7053	31.6749	30.7735	30.415	29.4554	29.3956	30.8636	31.2175	29.8949	29.6776	29.0741	29.6354	29.6926	29.9263	31.3811	29.6722	30.6865	30.1967	31.431	30.9117	31.3121	31.2824	30.5293	31.6832	31.1782	31.7795	29.9684	30.1607	31.3345	30.5509	30.8979	31.3296	30.8596
2054.19	4868.1	30.4669	30.8219	32.1357	31.2796	31.9213	31.9777	27.1714	28.8763	32.0693	32.2852	32.1817	32.8218	33.7053	32.696	30.6246	32.5067	31.486	30.575	30.2203	29.2591	29.2172	30.6716	31.0181	29.6979	29.4712	28.8599	29.4258	29.4705	29.7192	31.1705	29.4728	30.475	29.994	31.2204	30.7065	31.0876	31.0753	30.3153	31.4798	30.9654	31.5734	29.7664	29.9535	31.1232	30.3346	30.695	31.1127	30.646
2056.12	4863.53	30.2817	30.6376	31.958	31.0853	31.7329	31.7913	27.0003	28.691	31.8912	32.1094	31.9927	32.6421	33.528	32.5155	30.4471	32.3288	31.3147	30.3923	30.0501	29.0731	29.0452	30.4881	30.8439	29.5108	29.2522	28.6638	29.236	29.2809	29.5315	30.9808	29.2916	30.2885	29.8094	31.0244	30.5167	30.8885	30.8853	30.1216	31.2955	30.7688	31.3818	29.5814	29.7699	30.9332	30.1563	30.509	30.9174	30.4504
2058.05	4858.98	30.0861	30.4418	31.7537	30.8845	31.5293	31.5934	26.8038	28.4992	31.7006	31.9219	31.7966	32.4392	33.3457	32.3224	30.2555	32.1398	31.1301	30.2033	29.8651	28.8725	28.8663	30.3002	30.6647	29.3195	29.031	28.4616	29.0425	29.0798	29.3358	30.783	29.1	30.0931	29.6173	30.8194	30.3203	30.6909	30.6849	29.9234	31.0931	30.5808	31.1842	29.3917	29.5941	30.7419	29.9764	30.3276	30.7126	30.2425
2059.98	4854.43	29.9081	30.2649	31.58	30.7004	31.3514	31.4087	26.6349	28.3271	31.5254	31.7496	31.6185	32.2545	33.1802	32.1575	30.0867	31.9692	30.9584	30.0366	29.7119	28.6926	28.7038	30.1288	30.5041	29.1462	28.8507	28.2767	28.865	28.9002	29.1622	30.6049	28.9289	29.9117	29.4405	30.6366	30.1513	30.5078	30.5001	29.7395	30.9089	30.4016	31.0077	29.2194	29.4286	30.5667	29.8071	30.1621	30.5211	30.0538
2061.9	4849.89	29.7265	30.1016	31.418	30.5167	31.1795	31.2233	26.4773	28.1623	31.3697	31.5885	31.4493	32.074	33.0188	31.9931	29.9393	31.8145	30.7939	29.8691	29.563	28.5327	28.567	29.9668	30.3543	28.9843	28.6868	28.0978	28.688	28.7287	28.9865	30.4303	28.7671	29.7328	29.2714	30.4609	29.9781	30.3152	30.3193	29.5589	30.7322	30.2302	30.8395	29.0437	29.2629	30.3917	29.6421	29.9859	30.3316	29.8669
2063.83	4845.35	29.5358	29.9147	31.2368	30.3204	30.9961	31.0345	26.2829	27.9647	31.1818	31.3973	31.2549	31.8817	32.8353	31.8076	29.756	31.636	30.6181	29.7042	29.386	28.3654	28.3972	29.7922	30.191	28.8098	28.4974	27.9084	28.495	28.5402	28.7974	30.2357	28.5832	29.543	29.087	30.2665	29.7954	30.1122	30.1257	29.3662	30.536	30.0602	30.6546	28.8521	29.0969	30.2073	29.4608	29.8002	30.1364	29.6707
2065.76	4840.83	29.3353	29.703	31.0191	30.1159	30.7961	30.8311	26.084	27.7607	30.9579	31.1954	31.036	31.6799	32.6346	31.6102	29.544	31.4257	30.424	29.5166	29.1948	28.1711	28.1977	29.5869	29.9995	28.6125	28.2871	27.7004	28.2881	28.3278	28.5943	30.0269	28.3884	29.3401	28.8876	30.0351	29.6022	29.908	29.9199	29.1586	30.3255	29.8589	30.4445	28.6512	28.906	30.0037	29.2587	29.5981	29.934	29.4702
2067.69	4836.31	29.19	29.5589	30.8572	29.9677	30.6409	30.6805	25.9459	27.628	30.8059	31.0595	30.8842	31.5334	32.4958	31.4669	29.4075	31.2825	30.2856	29.3598	29.068	28.0257	28.0894	29.4359	29.8565	28.4565	28.1303	27.5397	28.1387	28.166	28.4413	29.8807	28.2535	29.1877	28.7426	29.8625	29.4451	29.7496	29.7677	29.007	30.1724	29.6908	30.2988	28.4946	28.751	29.8457	29.1079	29.4455	29.7791	29.3181
2069.62	4831.81	29.0314	29.3979	30.6944	29.8011	30.474	30.515	25.7821	27.4735	30.6423	30.9055	30.7175	31.368	32.3433	31.3091	29.2544	31.1292	30.1416	29.1969	28.9197	27.8745	27.9448	29.2873	29.7053	28.2998	27.9693	27.3705	27.9801	28.0092	28.2789	29.7194	28.0892	29.023	28.5804	29.7011	29.2779	29.5745	29.6109	28.8405	30.0224	29.5298	30.1387	28.3397	28.5844	29.6819	28.9499	29.2756	29.6088	29.1421
2071.55	4827.31	28.8839	29.2519	30.5425	29.6458	30.3235	30.3745	25.6456	27.336	30.5011	30.754	30.5627	31.2112	32.1944	31.1682	29.1165	30.9869	30.005	29.0531	28.7838	27.7314	27.8071	29.1681	29.5704	28.1532	27.8405	27.2159	27.8366	27.8731	28.1327	29.5692	27.9353	28.872	28.4334	29.5569	29.1263	29.4106	29.4661	28.6872	29.8874	29.3794	29.9843	28.1986	28.4291	29.5301	28.8102	29.1276	29.4487	28.9735
2073.48	4822.82	28.7242	29.0912	30.3808	29.4767	30.1582	30.2166	25.4947	27.1844	30.3357	30.5819	30.3925	31.0567	32.0331	31.0125	28.958	30.8279	29.864	28.8994	28.6386	27.5799	27.6554	29.0283	29.4237	27.9972	27.6924	27.0479	27.679	27.7085	27.9749	29.4088	27.7734	28.7099	28.2717	29.4033	28.9669	29.2392	29.3043	28.5163	29.7308	29.2177	29.8259	28.0405	28.2562	29.3625	28.6678	28.9669	29.2808	28.8064
2075.41	4818.33	28.5939	28.9572	30.2477	29.33	30.0133	30.0798	25.3495	27.0389	30.1987	30.4403	30.2476	30.9293	31.9027	30.8787	28.8235	30.6892	29.7454	28.7636	28.5105	27.4551	27.5327	28.8965	29.2976	27.8705	27.5384	26.8998	27.5373	27.5576	27.8355	29.271	27.6395	28.5695	28.1323	29.2638	28.8303	29.0853	29.16	28.3706	29.5874	29.0868	29.6883	27.8907	28.1076	29.2187	28.5416	28.8151	29.1335	28.6669
2077.33	4813.86	28.4557	28.8056	30.0897	29.1758	29.8582	29.9292	25.2092	26.883	30.043	30.3002	30.0899	30.772	31.7611	30.7319	28.6682	30.5395	29.6093	28.6183	28.3633	27.3108	27.3831	28.7543	29.1581	27.72	27.3668	26.7432	27.3857	27.3996	27.6811	29.118	27.4923	28.417	27.9792	29.1075	28.6756	28.92	29.005	28.2123	29.4296	28.9383	29.5424	27.7433	27.9666	29.0671	28.3821	28.662	28.9741	28.5074
2079.26	4809.39	28.3332	28.6772	29.9607	29.0461	29.7301	29.7939	25.0898	26.7656	29.9088	30.1854	29.9571	30.6341	31.6433	30.6088	28.5456	30.4152	29.4967	28.4916	28.2532	27.1836	27.2709	28.6165	29.0405	27.5953	27.2243	26.6069	27.2573	27.271	27.5507	28.9872	27.3659	28.2832	27.8539	28.9658	28.5472	28.7793	28.8663	28.0761	29.2994	28.8059	29.4156	27.6139	27.849	28.9391	28.248	28.545	28.8363	28.3671
2081.19	4804.94	28.1886	28.5383	29.8216	28.9048	29.5956	29.6449	24.9448	26.6377	29.7682	30.0414	29.8124	30.4903	31.515	30.4725	28.416	30.2868	29.3632	28.359	28.1316	27.0441	27.1557	28.4776	28.9199	27.4583	27.0675	26.4634	27.1216	27.123	27.4095	28.8458	27.2289	28.1414	27.7176	28.8218	28.4087	28.6306	28.7193	27.9317	29.1675	28.6756	29.2716	27.4769	27.7255	28.8023	28.1183	28.4192	28.6904	28.2211
2083.12	4800.49	28.0667	28.4235	29.7053	28.7846	29.4808	29.514	24.8321	26.5213	29.6512	29.8933	29.6877	30.3723	31.4065	30.3624	28.3115	30.1771	29.2536	28.2475	28.0307	26.9331	27.0606	28.3776	28.8204	27.3328	26.9355	26.3388	27.0029	26.9926	27.2903	28.7274	27.1163	28.0223	27.5993	28.6987	28.2912	28.5059	28.5987	27.8079	29.0571	28.56	29.1615	27.3767	27.626	28.6843	28.0162	28.2936	28.5602	28.0951
2085.05	4796.05	27.943	28.3005	29.5836	28.6562	29.3552	29.3947	24.7249	26.4042	29.5246	29.7715	29.5597	30.248	31.2883	30.2479	28.2011	30.0616	29.141	28.1292	27.9273	26.8221	26.9586	28.2765	28.7143	27.2069	26.8076	26.2106	26.8771	26.8596	27.1674	28.605	26.9952	27.8967	27.4773	28.5726	28.1719	28.371	28.4753	27.6758	28.9302	28.4397	29.0502	27.2601	27.5129	28.5576	27.9015	28.1622	28.4272	27.9623
2086.98	4791.62	27.8397	28.1998	29.4841	28.5433	29.2479	29.2951	24.6281	26.303	29.4177	29.6813	29.4531	30.1413	31.1938	30.15	28.1056	29.9648	29.0496	28.0289	27.8366	26.7195	26.8918	28.1932	28.6269	27.1155	26.6964	26.1005	26.7729	26.7454	27.0623	28.4988	26.89	27.7871	27.3777	28.459	28.0686	28.2497	28.3665	27.5618	28.8193	28.339	28.9413	27.1557	27.4078	28.4499	27.8	28.0567	28.3149	27.851
2088.91	4787.19	27.7191	28.0757	29.3622	28.4125	29.1242	29.1654	24.515	26.1772	29.2868	29.5639	29.3204	30.0063	31.0786	30.0267	27.9801	29.8474	28.9497	27.9146	27.7223	26.5998	26.7908	28.0748	28.518	27.0129	26.5733	25.9723	26.6476	26.6133	26.9383	28.3718	26.7685	27.6588	27.2541	28.3269	27.9535	28.1136	28.2405	27.4334	28.6908	28.2172	28.8221	27.0242	27.2878	28.3314	27.6821	27.9516	28.1839	27.7164
2090.84	4782.77	27.6202	27.9678	29.25	28.3039	29.0179	29.0572	24.4187	26.0792	29.1751	29.4633	29.2001	29.8899	30.9761	29.9255	27.8725	29.7392	28.8608	27.8135	27.6241	26.5009	26.6827	27.973	28.4224	26.9099	26.4727	25.8575	26.5389	26.5169	26.8266	28.2641	26.6668	27.5494	27.146	28.2091	27.8502	27.998	28.1361	27.3218	28.5849	28.1136	28.722	26.9116	27.1849	28.2261	27.5834	27.8576	28.0709	27.5979
2092.77	4778.37	27.5236	27.873	29.147	28.2046	28.9212	28.9595	24.3261	25.9859	29.0804	29.3584	29.1002	29.7971	30.8878	29.8334	27.7882	29.6462	28.7746	27.7136	27.5412	26.4106	26.6024	27.8891	28.3381	26.8098	26.367	25.7534	26.447	26.4147	26.7296	28.1685	26.5751	27.4515	27.0461	28.1109	27.7437	27.8906	28.0352	27.2211	28.4971	28.0115	28.63	26.8049	27.0773	28.1213	27.4846	27.7555	27.9666	27.491
2094.69	4773.97	27.4393	27.786	29.0594	28.1144	28.8349	28.884	24.2455	25.8995	28.9925	29.259	29.0069	29.7177	30.8081	29.7522	27.7072	29.5638	28.6928	27.6305	27.4675	26.3392	26.5319	27.8085	28.2661	26.7329	26.2766	25.6601	26.3666	26.3064	26.6474	28.0818	26.4857	27.3614	26.9583	28.0269	27.6599	27.8029	27.9463	27.1293	28.4207	27.9273	28.5408	26.7262	26.9874	28.0305	27.3955	27.6593	27.8722	27.3982
2096.62	4769.57	27.3496	27.6974	28.965	28.0195	28.7419	28.7904	24.1482	25.8122	28.8998	29.1706	28.9065	29.6216	30.7201	29.6701	27.6246	29.4803	28.6014	27.5425	27.3889	26.2583	26.4578	27.7142	28.1883	26.6505	26.1944	25.564	26.2758	26.2256	26.5569	27.9923	26.3935	27.2657	26.873	27.9298	27.5705	27.7072	27.8549	27.0335	28.3314	27.8473	28.4497	26.6388	26.9011	27.9376	27.3135	27.5557	27.774	27.299
2098.55	4765.19	27.2761	27.6221	28.894	27.9375	28.6679	28.7057	24.0708	25.7227	28.82	29.1084	28.8217	29.5438	30.6478	29.5979	27.5521	29.4115	28.5406	27.4719	27.3217	26.186	26.3928	27.6388	28.1229	26.5673	26.1156	25.4805	26.1988	26.1577	26.4769	27.9143	26.3154	27.182	26.7966	27.8457	27.4879	27.6193	27.7741	26.9484	28.254	27.7687	28.3769	26.5563	26.8201	27.859	27.2451	27.4753	27.6909	27.2101
2100.48	4760.82	27.2045	27.547	28.819	27.8558	28.5926	28.6215	23.9919	25.6487	28.7316	29.041	28.7422	29.4667	30.5802	29.5215	27.4782	29.3404	28.4791	27.3932	27.248	26.1071	26.3457	27.5663	28.0555	26.485	26.013	25.3956	26.1213	26.0619	26.3964	27.8353	26.2385	27.0993	26.7169	27.7599	27.4128	27.5272	27.6963	26.8606	28.1781	27.684	28.3042	26.4681	26.7444	27.7801	27.1815	27.4065	27.6065	27.1234
2102.41	4756.45	27.149	27.4837	28.7514	27.7897	28.5241	28.5653	23.9215	25.5982	28.655	28.9729	28.6726	29.4014	30.5292	29.4646	27.4164	29.2807	28.4368	27.3319	27.185	26.0348	26.3003	27.5216	27.9986	26.4203	25.9312	25.3271	26.0568	25.9825	26.3306	27.771	26.1763	27.0322	26.6486	27.6949	27.3502	27.4589	27.6346	26.7833	28.1121	27.6228	28.2357	26.403	26.6972	27.7179	27.1238	27.3534	27.5354	27.0553
2104.34	4752.09	27.0815	27.4167	28.681	27.7178	28.4585	28.4934	23.8604	25.5404	28.59	28.9007	28.5963	29.3317	30.468	29.4057	27.3568	29.2171	28.3973	27.2658	27.1248	25.9737	26.2478	27.477	27.9409	26.3568	25.8613	25.2539	25.9906	25.9232	26.2625	27.7023	26.1104	26.9632	26.5811	27.6246	27.2822	27.3819	27.567	26.7051	28.0473	27.5451	28.1721	26.3536	26.6503	27.6471	27.0501	27.2904	27.4622	26.9815
2106.27	4747.74	27.0258	27.3644	28.6309	27.6587	28.412	28.4311	23.8235	25.5069	28.539	28.8526	28.5331	29.273	30.421	29.3555	27.3117	29.1713	28.3597	27.2176	27.0804	25.9346	26.2071	27.4386	27.9058	26.3077	25.8109	25.1956	25.9411	25.8588	26.2103	27.6465	26.0585	26.9066	26.5287	27.5649	27.2283	27.3148	27.5114	26.6456	28.0095	27.4931	28.126	26.3083	26.6065	27.5948	26.9884	27.2355	27.4022	26.9198
2108.2	4743.39	26.9677	27.3088	28.574	27.5986	28.3555	28.3702	23.7728	25.4508	28.4795	28.8015	28.4677	29.2061	30.3659	29.3026	27.2583	29.1177	28.309	27.1648	27.0303	25.8862	26.157	27.3757	27.8619	26.2575	25.7305	25.1316	25.8835	25.7793	26.1541	27.5875	26.0011	26.8445	26.4704	27.5018	27.1688	27.2475	27.4489	26.5862	27.9632	27.4431	28.0781	26.2559	26.5442	27.5364	26.9347	27.1643	27.3347	26.8518
2110.12	4739.06	26.9342	27.2755	28.5381	27.5608	28.3192	28.3388	23.7435	25.408	28.4411	28.7708	28.4262	29.1691	30.3345	29.2684	27.2297	29.088	28.287	27.1301	26.9995	25.866	26.1221	27.3218	27.8363	26.2432	25.6791	25.0895	25.8423	25.7379	26.114	27.5501	25.9644	26.8026	26.4314	27.4623	27.1327	27.1977	27.4075	26.5442	27.9186	27.4189	28.0482	26.2182	26.4949	27.4961	26.9032	27.1242	27.2883	26.8016
2112.05	4734.73	26.8939	27.2351	28.4958	27.5132	28.276	28.2967	23.7132	25.3564	28.3913	28.7368	28.3794	29.1314	30.3047	29.2259	27.1927	29.0527	28.2541	27.0905	26.965	25.8289	26.0861	27.2899	27.8061	26.2129	25.6366	25.0412	25.7984	25.6858	26.0691	27.5061	25.9243	26.7567	26.3902	27.41	27.0859	27.144	27.3592	26.4878	27.8677	27.3786	28.0068	26.1644	26.4486	27.4519	26.8656	27.0885	27.2371	26.7494
2113.98	4730.41	26.8665	27.206	28.4676	27.4786	28.248	28.2646	23.6833	25.3327	28.3549	28.719	28.3452	29.0996	30.2817	29.2031	27.1677	29.0316	28.2423	27.0689	26.9433	25.8021	26.069	27.2944	27.7892	26.1819	25.6155	25.0047	25.762	25.6489	26.0394	27.474	25.8992	26.7229	26.3631	27.367	27.0559	27.1046	27.3278	26.4522	27.8361	27.3469	27.9831	26.1173	26.4282	27.4217	26.8518	27.0517	27.2006	26.7166
2115.91	4726.1	26.8325	27.167	28.4296	27.4396	28.2164	28.2273	23.6365	25.3006	28.3036	28.669	28.2991	29.0506	30.2417	29.172	27.1304	28.9981	28.2137	27.0379	26.9112	25.7737	26.04	27.2686	27.7606	26.1393	25.5771	24.9595	25.7264	25.6085	25.9974	27.4345	25.8619	26.6787	26.3255	27.3151	27.0272	27.0589	27.2915	26.4077	27.8015	27.3161	27.952	26.0663	26.3975	27.3843	26.8158	27.0062	27.1584	26.6689
2117.84	4721.79	26.8253	27.1609	28.4176	27.4265	28.2109	28.2219	23.6252	25.2942	28.2903	28.6501	28.282	29.0379	30.2362	29.1654	27.1274	28.9959	28.2154	27.0258	26.9075	25.7647	26.047	27.2577	27.7604	26.1301	25.5606	24.9421	25.7228	25.5932	25.9839	27.4248	25.8493	26.6623	26.3118	27.306	27.0121	27.0401	27.2822	26.3873	27.8088	27.3068	27.9431	26.0527	26.386	27.3682	26.7896	26.9919	27.1417	26.6401
2119.77	4717.5	26.8083	27.1381	28.398	27.3993	28.1898	28.197	23.6084	25.2829	28.2673	28.6477	28.2534	29.0225	30.2175	29.1477	27.107	28.9802	28.2094	27.0065	26.8919	25.7459	26.043	27.2368	27.7509	26.1054	25.5361	24.9158	25.7037	25.5603	25.9622	27.4017	25.8202	26.6372	26.2842	27.2889	26.9836	27.0105	27.264	26.3523	27.7991	27.2878	27.9309	26.0389	26.3645	27.3463	26.7586	26.963	27.1122	26.6027
2121.7	4713.21	26.8136	27.1403	28.3956	27.3939	28.1902	28.2042	23.6083	25.2821	28.2661	28.6594	28.2462	29.0245	30.2197	29.1523	27.1128	28.9855	28.2207	27.0096	26.8944	25.7484	26.0556	27.2285	27.759	26.1009	25.5399	24.9105	25.7033	25.5565	25.9596	27.3974	25.8185	26.6319	26.2826	27.285	26.9788	26.9986	27.259	26.3441	27.7903	27.2864	27.9332	26.054	26.3605	27.3426	26.7784	26.9578	27.1031	26.5969
2123.63	4708.93	26.8088	27.1298	28.3865	27.3793	28.1806	28.1971	23.607	25.2785	28.2503	28.6445	28.2254	29.0098	30.2111	29.1423	27.1019	28.9789	28.2236	27.0062	26.8824	25.731	26.0498	27.2167	27.7564	26.1098	25.5395	24.8939	25.6943	25.5447	25.9483	27.3846	25.8073	26.6133	26.2714	27.2666	26.9682	26.976	27.2431	26.3286	27.7763	27.2662	27.9236	26.0529	26.3579	27.3268	26.7863	26.9461	27.0877	26.5856
2125.56	4704.65	26.8274	27.1468	28.4026	27.3879	28.192	28.2117	23.618	25.2952	28.2603	28.6498	28.2343	29.0177	30.2288	29.1607	27.1168	28.9952	28.2504	27.0218	26.8937	25.7454	26.0787	27.2321	27.7738	26.1273	25.5352	24.897	25.705	25.5533	25.9583	27.3953	25.8186	26.6175	26.2819	27.2712	26.9859	26.9776	27.2563	26.3353	27.7933	27.2766	27.9377	26.0688	26.3738	27.3345	26.8052	26.9594	27.0894	26.5848
2127.48	4700.39	26.8373	27.152	28.4039	27.3897	28.198	28.2122	23.6187	25.3047	28.2572	28.6407	28.2347	29.0137	30.2366	29.1714	27.1177	29.0039	28.2754	27.0278	26.8964	25.7554	26.0864	27.2568	27.7836	26.1236	25.5138	24.8942	25.7078	25.5496	25.9599	27.394	25.818	26.6159	26.2829	27.2702	26.9884	26.97	27.2556	26.3328	27.7971	27.2771	27.9498	26.0689	26.3794	27.3377	26.8103	26.9618	27.0856	26.5725
2129.41	4696.13	26.8611	27.1756	28.4308	27.41	28.229	28.2347	23.6522	25.335	28.2829	28.6678	28.2529	29.0352	30.2669	29.2017	27.1471	29.0377	28.3149	27.053	26.9287	25.7819	26.1192	27.2964	27.8167	26.1516	25.5186	24.9105	25.7322	25.5684	25.9831	27.414	25.8422	26.6372	26.3094	27.2957	27.008	26.9858	27.2742	26.3506	27.8252	27.3026	27.9784	26.0911	26.4015	27.3591	26.8415	26.974	27.1017	26.5845
2131.34	4691.88	26.8738	27.1897	28.4489	27.4233	28.2534	28.2587	23.6677	25.3376	28.3006	28.7092	28.2664	29.0544	30.2878	29.2193	27.1713	29.0685	28.3331	27.0768	26.9526	25.809	26.1436	27.3173	27.8482	26.1735	25.5321	24.9208	25.7505	25.5888	26.0026	27.4298	25.8618	26.6478	26.3245	27.3062	27.027	26.9992	27.2879	26.3546	27.8482	27.3188	27.9931	26.1055	26.4245	27.3749	26.8622	26.9889	27.1128	26.6019
2133.27	4687.64	26.9111	27.229	28.4885	27.4557	28.2921	28.292	23.6947	25.3702	28.3418	28.7576	28.3039	29.0913	30.3271	29.2574	27.2176	29.1142	28.3812	27.1168	26.9947	25.8541	26.2065	27.3636	27.8987	26.2086	25.5796	24.9493	25.7867	25.6141	26.0393	27.464	25.9	26.6764	26.3576	27.3388	27.0597	27.0295	27.3189	26.3789	27.8825	27.3418	28.0297	26.1406	26.462	27.4102	26.8994	27.0224	27.1415	26.6339
2135.2	4683.4	26.9409	27.2562	28.5172	27.4772	28.3187	28.3085	23.7227	25.3921	28.364	28.7724	28.3264	29.1074	30.3533	29.2877	27.2433	29.1473	28.4252	27.1498	27.023	25.8812	26.241	27.3985	27.9346	26.237	25.611	24.9702	25.8151	25.6265	26.063	27.4878	25.9209	26.6986	26.3817	27.3578	27.0864	27.0384	27.3459	26.3945	27.9104	27.3652	28.0596	26.1614	26.4963	27.4358	26.9348	27.0443	27.1592	26.6488
2137.13	4679.18	26.9878	27.3026	28.562	27.5169	28.3662	28.3571	23.7662	25.4345	28.4062	28.8027	28.3632	29.145	30.3973	29.336	27.2878	29.1977	28.4822	27.1978	27.0716	25.9333	26.2884	27.4431	27.9853	26.2832	25.6471	25.008	25.8538	25.663	26.1051	27.5272	25.9589	26.7397	26.4248	27.3984	27.1318	27.0728	27.3937	26.4275	27.9502	27.4093	28.1143	26.1882	26.5446	27.4784	26.9894	27.092	27.1951	26.6815
2139.06	4674.96	27.0294	27.3435	28.6026	27.5551	28.4128	28.4124	23.7995	25.485	28.4428	28.8502	28.3968	29.1902	30.4379	29.3821	27.3297	29.2438	28.5363	27.2434	27.1106	25.9763	26.3313	27.4734	28.0324	26.3256	25.6695	25.0436	25.8839	25.6999	26.1384	27.5621	25.9979	26.7755	26.4616	27.4305	27.1748	27.114	27.4371	26.4597	27.9837	27.4582	28.1617	26.2235	26.5805	27.5171	27.0453	27.1395	27.2288	26.7138
2140.99	4670.75	27.0907	27.4068	28.6647	27.6099	28.4739	28.4676	23.8643	25.5559	28.494	28.9245	28.4491	29.2513	30.503	29.4456	27.3912	29.3064	28.6063	27.307	27.1706	26.0313	26.3972	27.5278	28.0957	26.3881	25.7269	25.0951	25.9389	25.7472	26.1921	27.6177	26.0609	26.8265	26.5198	27.4896	27.2393	27.1646	27.4935	26.5102	28.0388	27.5216	28.2279	26.2828	26.6402	27.5739	27.1107	27.2054	27.2796	26.761
2142.91	4666.54	27.1507	27.4647	28.7249	27.6638	28.5313	28.5127	23.9233	25.625	28.5408	28.9874	28.5015	29.3052	30.5656	29.5035	27.4492	29.3732	28.6631	27.3652	27.2266	26.0839	26.4585	27.5936	28.1586	26.453	25.7827	25.1455	25.9997	25.7865	26.2471	27.6729	26.1205	26.8766	26.5766	27.539	27.2902	27.2021	27.544	26.5582	28.1093	27.5727	28.2902	26.341	26.7086	27.6252	27.1696	27.2543	27.3297	26.8057
2144.84	4662.35	27.226	27.5322	28.7976	27.7315	28.6037	28.5853	23.9959	25.6782	28.605	29.061	28.5697	29.3713	30.632	29.5755	27.5188	29.4526	28.7371	27.4402	27.2922	26.1441	26.5281	27.6719	28.2371	26.5331	25.8505	25.2083	26.0729	25.8512	26.3183	27.7402	26.186	26.9421	26.6446	27.6066	27.3533	27.2596	27.6113	26.6217	28.1993	27.6355	28.3673	26.4143	26.778	27.6915	27.2187	27.3042	27.393	26.8675
2146.77	4658.16	27.2932	27.5955	28.8633	27.7914	28.6718	28.6677	24.0662	25.7391	28.6692	29.1239	28.6313	29.4343	30.6971	29.6446	27.5857	29.5268	28.8128	27.5127	27.3549	26.2139	26.5951	27.753	28.3114	26.5955	25.9275	25.2669	26.1403	25.9104	26.3858	27.8023	26.2442	27.0048	26.7094	27.6623	27.4224	27.3155	27.6766	26.6823	28.2637	27.6976	28.4321	26.4902	26.8349	27.7552	27.2772	27.3618	27.451	26.9291
2148.7	4653.97	27.3785	27.6791	28.9526	27.8702	28.7563	28.7528	24.1326	25.8201	28.7502	29.2032	28.7077	29.5232	30.7779	29.7318	27.6699	29.6174	28.9079	27.5993	27.4379	26.3144	26.6906	27.839	28.3988	26.6703	26.0121	25.3416	26.2203	25.9982	26.4656	27.883	26.3213	27.0796	26.7887	27.7412	27.5008	27.3875	27.7571	26.7591	28.3436	27.7881	28.5151	26.5785	26.9015	27.8305	27.3745	27.4536	27.5262	27.0024
2150.63	4649.8	27.4604	27.7551	29.0304	27.9441	28.837	28.8263	24.2002	25.8792	28.8255	29.292	28.7782	29.6057	30.8525	29.8152	27.7447	29.7019	28.9985	27.6801	27.5158	26.4085	26.7802	27.9115	28.4799	26.7386	26.0626	25.4117	26.297	26.0767	26.5343	27.9561	26.3957	27.1486	26.8614	27.8066	27.5772	27.4522	27.829	26.8218	28.4217	27.8645	28.5934	26.6377	26.9715	27.9054	27.4635	27.5383	27.5962	27.0669
2152.56	4645.63	27.5564	27.847	29.1184	28.0317	28.9303	28.9202	24.2926	25.9835	28.9138	29.3945	28.8677	29.6883	30.9503	29.9113	27.8336	29.7977	29.0985	27.7727	27.608	26.5122	26.8782	27.9998	28.5753	26.8236	26.1387	25.496	26.386	26.1605	26.6217	28.0429	26.4832	27.2343	26.952	27.8919	27.6683	27.5378	27.9175	26.9007	28.513	27.9522	28.6902	26.7119	27.0804	27.9974	27.5499	27.6304	27.6805	27.1512
2154.49	4641.48	27.6487	27.9352	29.2054	28.1146	29.0208	29.0169	24.3818	26.0808	28.9924	29.4909	28.9545	29.7663	31.0388	30.0013	27.921	29.8893	29.1843	27.8647	27.6967	26.5971	26.9695	28.0965	28.6699	26.9096	26.2222	25.5782	26.4715	26.2332	26.7096	28.1267	26.5661	27.3192	27.0395	27.9747	27.7535	27.6229	28.0072	26.9782	28.6011	28.0328	28.7756	26.8019	27.1822	28.084	27.6383	27.7222	27.7579	27.2335
2156.42	4637.32	27.7519	28.0407	29.3081	28.2144	29.1305	29.1232	24.4829	26.1837	29.0912	29.5986	29.0574	29.8714	31.1429	30.1105	28.0279	30.0002	29.2768	27.9737	27.8018	26.6856	27.0766	28.2149	28.7816	27.0244	26.3197	25.6748	26.5717	26.3309	26.8098	28.2254	26.6674	27.4192	27.1408	28.0789	27.858	27.7116	28.1096	27.0721	28.7036	28.1318	28.8808	26.9144	27.285	28.1854	27.7416	27.821	27.8519	27.332
2158.35	4633.18	27.8529	28.1415	29.4067	28.3096	29.2369	29.2235	24.5773	26.2731	29.1898	29.7047	29.1562	29.976	31.2467	30.2171	28.1287	30.1086	29.3806	28.0773	27.9016	26.769	27.1804	28.3236	28.8859	27.139	26.4081	25.768	26.6695	26.4217	26.9077	28.323	26.7667	27.5122	27.2383	28.1776	27.9543	27.8012	28.2079	27.1637	28.7998	28.2461	28.9729	27.0072	27.3845	28.2852	27.8229	27.9101	27.9458	27.4229
2160.27	4629.04	27.9716	28.2577	29.52	28.4186	29.3532	29.3457	24.6878	26.3772	29.308	29.8217	29.2684	30.0901	31.365	30.3331	28.2445	30.2311	29.5018	28.198	28.0188	26.8734	27.2924	28.4239	29.0058	27.2697	26.5255	25.8743	26.7851	26.5192	27.0233	28.4353	26.8794	27.6206	27.3512	28.2919	28.0701	27.914	28.319	27.2697	28.91	28.3663	29.0843	27.1276	27.5032	28.4	27.9285	28.0177	28.0543	27.5258
2162.2	4624.91	28.0816	28.3663	29.6225	28.5228	29.4664	29.4608	24.7981	26.496	29.4206	29.9201	29.3729	30.1938	31.4735	30.4447	28.3532	30.3457	29.6179	28.3151	28.1297	26.9905	27.3994	28.5184	29.1204	27.3887	26.6241	25.976	26.8951	26.6282	27.1344	28.5396	26.986	27.7276	27.4586	28.3963	28.1849	28.013	28.4225	27.3683	29.0323	28.4528	29.1971	27.2439	27.6136	28.5062	28.046	28.1334	28.1592	27.6281
2164.13	4620.79	28.2085	28.49	29.7424	28.6431	29.5999	29.5847	24.9233	26.6252	29.5488	30.055	29.495	30.3128	31.5963	30.576	28.4804	30.4775	29.7584	28.4449	28.2546	27.1218	27.5332	28.6519	29.2512	27.508	26.7367	26.0945	27.019	26.7618	27.26	28.662	27.1104	27.8533	27.5847	28.5131	28.3061	28.1274	28.5452	27.4885	29.1682	28.5668	29.3297	27.3707	27.7349	28.6259	28.1918	28.2577	28.2775	27.7494
2166.06	4616.68	28.3328	28.6102	29.8571	28.7594	29.7228	29.7061	25.0357	26.7432	29.6706	30.1959	29.6152	30.431	31.7192	30.7024	28.5994	30.6058	29.8878	28.5698	28.3782	27.2401	27.6625	28.7838	29.3772	27.6172	26.858	26.2082	27.1401	26.8807	27.3773	28.7806	27.2287	27.9713	27.706	28.6245	28.428	28.2436	28.6701	27.6084	29.2821	28.6864	29.4555	27.4804	27.8443	28.7451	28.3165	28.3602	28.39	27.8639
2167.99	4612.57	28.4716	28.7465	29.9863	28.8895	29.8566	29.8548	25.1656	26.8577	29.7998	30.3316	29.7425	30.5718	31.8505	30.8414	28.7316	30.7446	30.0237	28.7083	28.5154	27.3786	27.7918	28.9173	29.5123	27.7459	26.9794	26.3321	27.2759	26.9993	27.5067	28.9135	27.3597	28.0998	27.8373	28.7547	28.5645	28.3757	28.8058	27.7331	29.4084	28.8268	29.5922	27.6138	27.9712	28.881	28.4427	28.4751	28.5181	27.9886
2169.92	4608.47	28.6046	28.8774	30.1082	29.0168	29.9918	29.9943	25.2862	26.9734	29.923	30.4641	29.8668	30.706	31.9726	30.9778	28.8571	30.8783	30.1566	28.8407	28.6477	27.5139	27.908	29.0453	29.6461	27.8825	27.108	26.4547	27.4066	27.1239	27.6342	29.0408	27.4854	28.2256	27.9606	28.8847	28.6986	28.4933	28.9311	27.8462	29.5347	28.9528	29.7212	27.746	28.1046	29.0118	28.5686	28.6157	28.6403	28.1085
2171.85	4604.38	28.7518	29.0237	30.2417	29.1599	30.1415	30.1444	25.4172	27.1129	30.0675	30.6132	30.0099	30.8473	32.1149	31.1279	29.0005	31.0268	30.2988	28.9863	28.7973	27.6581	28.0463	29.1891	29.7943	28.0394	27.2438	26.5922	27.5494	27.2502	27.7736	29.1799	27.6253	28.3702	28.0986	29.0323	28.8512	28.6268	29.0739	27.9842	29.6799	29.0837	29.8663	27.8902	28.2438	29.1499	28.7144	28.7808	28.7766	28.2461
2173.78	4600.29	28.8975	29.164	30.374	29.296	30.2851	30.301	25.5573	27.248	30.2088	30.7626	30.1472	30.9772	32.2562	31.2744	29.1387	31.1702	30.4329	29.1313	28.9416	27.7944	28.1783	29.3402	29.9399	28.1851	27.373	26.7266	27.6912	27.3683	27.9079	29.3156	27.7647	28.5139	28.233	29.1724	28.9901	28.7694	29.2134	28.1207	29.8289	29.2181	30.0083	28.024	28.377	29.2856	28.8639	28.9265	28.9086	28.3879
2175.7	4596.21	29.058	29.3208	30.5172	29.4468	30.4421	30.4683	25.701	27.4168	30.366	30.9272	30.2995	31.1318	32.4137	31.4347	29.293	31.3271	30.5942	29.2894	29.0979	27.9431	28.3204	29.4958	30.0995	28.3384	27.5233	26.8714	27.8481	27.525	28.0612	29.4674	27.9183	28.6685	28.3847	29.3219	29.1418	28.9235	29.3633	28.2688	29.9789	29.3778	30.1671	28.1734	28.5358	29.4391	29.0266	29.0688	29.0555	28.5406
2177.63	4592.14	29.2112	29.4724	30.6559	29.5953	30.5945	30.6266	25.8416	27.5703	30.5162	31.0862	30.4494	31.2903	32.5633	31.591	29.4425	31.4818	30.7621	29.4437	29.2469	28.0845	28.4772	29.6492	30.2543	28.4783	27.6627	27.0143	28.001	27.6848	28.2109	29.6178	28.0655	28.8181	28.5336	29.4752	29.2958	29.0587	29.5128	28.4073	30.1161	29.5342	30.3212	28.3269	28.6909	29.5906	29.1839	29.2079	29.1993	28.6885
2179.56	4588.08	29.3764	29.6373	30.8121	29.7556	30.7611	30.796	26.0071	27.7313	30.6825	31.241	30.6115	31.4521	32.7269	31.7624	29.6057	31.6514	30.9271	29.6102	29.4169	28.242	28.6515	29.8205	30.4209	28.6402	27.812	27.1693	28.1646	27.8373	28.3707	29.7807	28.2253	28.9823	28.6967	29.6333	29.4608	29.2092	29.6654	28.5597	30.2763	29.7005	30.4779	28.4897	28.8501	29.7514	29.3491	29.3691	29.3573	28.8455
2181.49	4584.02	29.5369	29.7971	30.9618	29.9103	30.9237	30.9613	26.157	27.8753	30.8436	31.4035	30.7637	31.6047	32.8814	31.9275	29.7608	31.816	31.0837	29.7739	29.5788	28.4062	28.7965	29.958	30.5825	28.8039	27.9566	27.3195	28.3256	27.9892	28.5283	29.9368	28.3806	29.1452	28.8535	29.7906	29.6242	29.3643	29.8165	28.7102	30.432	29.8469	30.6317	28.6521	29.002	29.9086	29.5114	29.5207	29.5101	28.9956
2183.42	4579.97	29.7114	29.9689	31.117	30.077	31.0978	31.1433	26.3192	28.0274	31.012	31.5906	30.9292	31.7746	33.0493	32.1029	29.9286	31.9911	31.2506	29.9464	29.7516	28.5825	28.9509	30.1184	30.7555	28.9731	28.1227	27.4828	28.4983	28.156	28.6975	30.1043	28.5487	29.3179	29.0216	29.9643	29.7974	29.5269	29.9908	28.8735	30.6068	30.004	30.7911	28.8369	29.1668	30.0771	29.6793	29.6807	29.6741	29.1615
2185.35	4575.93	29.8813	30.1345	31.2662	30.2396	31.2648	31.3135	26.4789	28.1788	31.1764	31.765	31.0917	31.9388	33.2124	32.2718	30.0893	32.1574	31.413	30.1128	29.9187	28.7493	29.1129	30.2872	30.9259	29.1375	28.2763	27.6429	28.6649	28.3039	28.8618	30.2699	28.7111	29.4844	29.1831	30.1405	29.9666	29.6854	30.159	29.0346	30.7591	30.1758	30.9526	29.0108	29.3251	30.2398	29.8405	29.8473	29.8343	29.3315
2187.28	4571.89	30.0621	30.3128	31.4326	30.4131	31.4434	31.4975	26.6555	28.3471	31.3542	31.9433	31.2689	32.121	33.3909	32.4564	30.2633	32.3341	31.5915	30.2926	30.0983	28.9251	29.2983	30.4692	31.1077	29.3208	28.4474	27.8121	28.8417	28.4757	29.0387	30.448	28.888	29.6655	29.3576	30.3162	30.1473	29.8608	30.3434	29.2046	30.9235	30.3611	31.1285	29.1798	29.4983	30.4169	30.0137	30.027	30.0033	29.5074
2189.21	4567.87	30.2395	30.4884	31.5985	30.585	31.6222	31.679	26.8277	28.5279	31.5303	32.127	31.4409	32.3015	33.5685	32.6365	30.4361	32.51	31.772	30.4699	30.2742	29.0954	29.4609	30.6579	31.2868	29.4974	28.621	27.9776	29.0187	28.6491	29.2072	30.6224	29.0631	29.8424	29.5304	30.4949	30.3185	30.037	30.5218	29.3718	31.0992	30.5209	31.2991	29.3405	29.6699	30.5961	30.1965	30.2039	30.1737	29.6676
2191.13	4563.84	30.4283	30.6789	31.781	30.7698	31.8114	31.8701	26.9988	28.7101	31.7173	32.3164	31.6252	32.4842	33.7579	32.8261	30.6219	32.6983	31.9569	30.6585	30.4604	29.2799	29.6444	30.8478	31.4766	29.6766	28.7981	28.1574	29.2099	28.8305	29.3929	30.8093	29.2505	30.0376	29.7149	30.6862	30.5069	30.2149	30.7036	29.5559	31.2804	30.7016	31.4759	29.5349	29.8526	30.7884	30.3952	30.3975	30.3577	29.8477
2193.06	4559.83	30.6155	30.8616	31.9608	30.9492	31.9936	32.0521	27.1736	28.8929	31.8962	32.4994	31.8059	32.6604	33.9383	33.0127	30.8026	32.8822	32.1451	30.8423	30.6455	29.4593	29.8345	31.0264	31.6633	29.867	28.9779	28.3364	29.3984	29.0034	29.575	30.993	29.4313	30.2286	29.8911	30.879	30.6948	30.3949	30.881	29.7352	31.4654	30.8866	31.6588	29.729	30.04	30.9706	30.5815	30.5787	30.5338	30.0358
2194.99	4555.82	30.8125	31.0524	32.1447	31.1376	32.1872	32.2443	27.3685	29.0854	32.0875	32.6893	31.9954	32.8632	34.132	33.2127	30.9953	33.0749	32.3396	31.0336	30.8378	29.6501	30.0226	31.2177	31.859	30.0625	29.1648	28.5254	29.5976	29.2061	29.7666	31.1892	29.6225	30.4255	30.0794	31.0718	30.8901	30.5934	31.0702	29.9247	31.6544	31.0775	31.8563	29.9263	30.2357	31.1619	30.771	30.7645	30.7237	30.2395
2196.92	4551.82	31.0032	31.2408	32.3287	31.3235	32.3776	32.4325	27.5584	29.2637	32.2721	32.8838	32.186	33.0661	34.3238	33.4061	31.181	33.2667	32.5185	31.2213	31.0208	29.8311	30.1986	31.4043	32.0516	30.2459	29.3365	28.7067	29.7905	29.3913	29.9541	31.3778	29.8096	30.6149	30.265	31.2673	31.0836	30.7818	31.2565	30.1041	31.8395	31.2735	32.052	30.1199	30.4211	31.3482	30.9547	30.9472	30.9121	30.4269
2198.85	4547.83	31.2067	31.4422	32.528	31.5218	32.5742	32.6347	27.7508	29.4681	32.4723	33.0943	32.3848	33.2605	34.5232	33.6074	31.3734	33.4665	32.7221	31.4207	31.2155	30.0182	30.398	31.6005	32.2549	30.4434	29.5287	28.8953	29.9914	29.5671	30.1519	31.5773	30.0044	30.815	30.4612	31.4706	31.2808	30.9694	31.4534	30.2937	32.0442	31.464	32.2465	30.3306	30.6171	31.5465	31.1553	31.1507	31.1113	30.6186
2200.78	4543.85	31.4069	31.6384	32.7233	31.7148	32.7678	32.8272	27.9434	29.6524	32.6689	33.2896	32.5769	33.4442	34.7222	33.8068	31.5613	33.6595	32.9199	31.6151	31.4075	30.2164	30.5924	31.8084	32.454	30.6354	29.7213	29.0821	30.187	29.7551	30.3451	31.7727	30.1971	31.0125	30.6555	31.6668	31.4728	31.1571	31.6479	30.4819	32.2413	31.6419	32.4453	30.5311	30.812	31.7457	31.3455	31.3596	31.3058	30.8046
2202.71	4539.87	31.6116	31.8428	32.9284	31.9178	32.9768	33.031	28.143	29.8459	32.8757	33.4826	32.7792	33.6521	34.9334	34.014	31.7617	33.8651	33.1226	31.8189	31.6112	30.4246	30.7898	32.0167	32.6602	30.8414	29.9153	29.28	30.3956	29.9651	30.5493	31.9762	30.3984	31.2186	30.8589	31.8707	31.681	31.3673	31.855	30.6847	32.4437	31.8422	32.6499	30.7263	31.0133	31.9559	31.5451	31.5628	31.5072	31.0041
2204.64	4535.89	31.8136	32.0396	33.1265	32.1171	33.1784	33.2357	28.342	30.0429	33.0773	33.6771	32.9779	33.8613	35.1329	34.2179	31.9594	34.0661	33.3219	32.0175	31.8144	30.63	30.9828	32.2155	32.8658	31.0426	30.1053	29.4769	30.6023	30.1548	30.7454	32.1779	30.5969	31.4204	31.0582	32.0712	31.882	31.5696	32.0581	30.8846	32.6389	32.0528	32.8489	30.9168	31.2145	32.1597	31.738	31.7543	31.7042	31.2115
2206.57	4531.93	32.0272	32.2467	33.3388	32.3265	33.3897	33.4466	28.5636	30.2447	33.2814	33.8876	33.1891	34.0797	35.3427	34.4326	32.1698	34.2721	33.5299	32.2243	32.0219	30.8476	31.1885	32.4339	33.083	31.2437	30.3077	29.6832	30.8171	30.3515	30.9553	32.3937	30.805	31.6319	31.2667	32.2845	32.1043	31.7787	32.2764	31.0882	32.8379	32.2787	33.0552	31.1313	31.4199	32.3728	31.9477	31.966	31.9116	31.4302
2208.49	4527.97	32.2389	32.4546	33.5517	32.5323	33.6005	33.6385	28.7717	30.4649	33.4779	34.1017	33.3958	34.2865	35.5567	34.6374	32.3751	34.4759	33.747	32.429	32.2193	31.0438	31.3966	32.6431	33.2961	31.4542	30.5177	29.886	31.026	30.5518	31.1674	32.6034	31.0093	31.8433	31.4682	32.4908	32.3203	31.9924	32.4826	31.2846	33.0433	32.4846	33.261	31.3405	31.6297	32.5859	32.1584	32.1714	32.1181	31.6373
2210.42	4524.02	32.4548	32.6717	33.7794	32.7503	33.8154	33.8229	28.9816	30.6758	33.6833	34.3198	33.6121	34.501	35.778	34.8482	32.5881	34.6912	33.9659	32.6421	32.4245	31.2493	31.6192	32.8594	33.5179	31.6772	30.7308	30.0953	31.2452	30.766	31.3831	32.8197	31.2202	32.0621	31.6793	32.7137	32.5344	32.214	32.6949	31.4958	33.2652	32.6928	33.4765	31.5519	31.8565	32.8088	32.371	32.386	32.3338	31.8468
2212.35	4520.08	32.6679	32.8842	34.0175	32.9682	34.0254	34.0293	29.1788	30.8817	33.8948	34.5225	33.8248	34.7228	35.989	35.0618	32.7946	34.9049	34.1812	32.8536	32.6275	31.4611	31.8303	33.065	33.7349	31.8896	30.9434	30.3016	31.4618	30.9698	31.5931	33.0315	31.4281	32.2772	31.8888	32.9246	32.744	32.4229	32.909	31.7072	33.4739	32.8994	33.6845	31.7733	32.0808	33.0293	32.5801	32.601	32.5457	32.0565
2214.28	4516.14	32.896	33.109	34.2634	33.1917	34.2484	34.2744	29.3882	31.1092	34.126	34.733	34.0477	34.9576	36.2123	35.2914	33.0114	35.1232	34.4022	33.0737	32.8509	31.6704	32.0391	33.2762	33.9552	32.1133	31.1625	30.5166	31.6852	31.1851	31.8123	33.2528	31.6457	32.4979	32.104	33.1481	32.9649	32.6346	33.1352	31.9312	33.7058	33.1231	33.901	31.9993	32.3169	33.2544	32.8105	32.825	32.7643	32.2736
2216.21	4512.21	33.1188	33.3298	34.4677	33.4037	34.4708	34.5081	29.6036	31.3102	34.3475	34.9582	34.2588	35.1767	36.4352	35.5161	33.2255	35.3353	34.6015	33.2888	33.0758	31.8905	32.2442	33.4959	34.1718	32.3401	31.3797	30.7299	31.9065	31.4133	32.0312	33.4706	31.8545	32.7122	32.3147	33.3631	33.1871	32.8464	33.3589	32.1432	33.9215	33.3552	34.1123	32.193	32.5369	33.4698	33.0273	33.0336	32.9779	32.4893
2218.14	4508.28	33.3471	33.5569	34.6545	33.6244	34.7004	34.7387	29.8148	31.5188	34.5722	35.2063	34.4758	35.3875	36.6598	35.7469	33.4487	35.5555	34.8121	33.5104	33.307	32.1262	32.4484	33.7226	34.3954	32.5718	31.6041	30.9508	32.1329	31.6424	32.2562	33.6966	32.072	32.9319	32.5373	33.5908	33.4159	33.0692	33.5883	32.3619	34.1406	33.5794	34.3319	32.4014	32.7393	33.6914	33.2441	33.2411	33.199	32.7163
2220.07	4504.37	33.5734	33.7791	34.8469	33.8445	34.9243	34.9712	30.0326	31.7298	34.7914	35.4392	34.6927	35.6026	36.8801	35.9721	33.6672	35.7724	35.0336	33.7264	33.5306	32.3453	32.6484	33.9548	34.6176	32.7872	31.8039	31.1665	32.3527	31.8617	32.4783	33.9186	32.2847	33.1427	32.7563	33.8036	33.6397	33.2867	33.8121	32.5773	34.3664	33.7902	34.5496	32.6194	32.9442	33.9111	33.4627	33.4554	33.4183	32.9385
2222	4500.46	33.807	34.0096	35.06	34.0756	35.1572	35.2116	30.2641	31.9577	35.0138	35.6719	34.9187	35.8408	37.1138	36.2063	33.8929	35.9946	35.2725	33.9501	33.7581	32.5733	32.8546	34.1975	34.8481	33.0051	32.0127	31.3902	32.5786	32.0805	32.7097	34.1469	32.5036	33.3569	32.9858	34.0298	33.873	33.5204	34.0463	32.8021	34.6073	34.0123	34.7752	32.8514	33.1637	34.1414	33.6933	33.6973	33.6465	33.1654
2223.92	4496.55	34.0388	34.2349	35.2764	34.3044	35.3884	35.4399	30.4948	32.1819	35.2307	35.8869	35.1432	36.0692	37.3382	36.4366	34.1166	36.2129	35.5136	34.1714	33.984	32.7998	33.0798	34.4132	35.0748	33.2296	32.2181	31.6135	32.8018	32.2945	32.9341	34.3718	32.7268	33.5824	33.2104	34.2549	34.0999	33.7503	34.2715	33.0238	34.849	34.2465	35.0014	33.0804	33.384	34.3722	33.9193	33.9346	33.8711	33.3882
2225.85	4492.66	34.2757	34.4668	35.5067	34.5392	35.6236	35.6567	30.7261	32.4038	35.4598	36.1055	35.3737	36.2959	37.572	36.669	34.3501	36.4394	35.7523	34.3995	34.2129	33.0344	33.3141	34.6352	35.3093	33.4667	32.4419	31.8429	33.0397	32.5158	33.1631	34.608	32.9651	33.8323	33.4355	34.4989	34.3334	33.9764	34.5015	33.2486	35.0728	34.4926	35.2377	33.3304	33.6232	34.6112	34.1542	34.159	34.1056	33.6173
2227.78	4488.77	34.5066	34.6935	35.7418	34.7676	35.8538	35.872	30.9567	32.6352	35.6926	36.3398	35.5995	36.5226	37.8046	36.8964	34.5781	36.6673	35.9807	34.6238	34.4323	33.2606	33.5426	34.8696	35.5412	33.698	32.6832	32.0695	33.283	32.7417	33.3941	34.8429	33.195	34.0754	33.6588	34.7414	34.5663	34.2026	34.7319	33.4714	35.2852	34.7127	35.4712	33.5699	33.8572	34.8445	34.3859	34.3685	34.3383	33.8557
2229.71	4484.89	34.7431	34.9268	35.9847	35.0055	36.0927	36.1082	31.2008	32.8726	35.9251	36.58	35.833	36.7597	38.0466	37.1318	34.81	36.9002	36.2123	34.8537	34.6608	33.489	33.7661	35.1034	35.7785	33.9393	32.9287	32.3027	33.5285	32.9925	33.6328	35.083	33.433	34.3188	33.8911	34.985	34.8012	34.4445	34.9674	33.7038	35.5169	34.94	35.7042	33.8091	34.095	35.0827	34.6199	34.5945	34.5744	34.0977
2231.64	4481.01	34.9748	35.159	36.2256	35.24	36.3242	36.3325	31.4387	33.1038	36.1524	36.808	36.0629	36.9973	38.2834	37.3612	35.0343	37.1295	36.4352	35.0804	34.8807	33.7214	33.9905	35.3347	36.0121	34.1658	33.1434	32.5303	33.7691	33.2132	33.8643	35.3185	33.6631	34.5548	34.116	35.2174	35.037	34.679	35.1978	33.9347	35.7514	35.1516	35.9373	34.0424	34.3422	35.3199	34.8459	34.8406	34.8028	34.3213
2233.57	4477.14	35.2133	35.3931	36.4778	35.4799	36.5577	36.5484	31.6795	33.3433	36.3848	37.0369	36.3	37.2394	38.5263	37.5939	35.268	37.3633	36.6682	35.3129	35.1075	33.9604	34.22	35.5779	36.2532	34.3915	33.3725	32.7633	34.0135	33.4321	34.1024	35.5592	33.8927	34.7959	34.3488	35.4583	35.2746	34.9124	35.4439	34.1721	36.0005	35.3878	36.1823	34.2779	34.5923	35.5633	35.0904	35.0951	35.0374	34.5524
2235.5	4473.28	35.4482	35.6201	36.7356	35.7163	36.7898	36.7567	31.9114	33.5771	36.603	37.2573	36.535	37.469	38.763	37.8207	35.4971	37.5901	36.9062	35.5384	35.327	34.1983	34.4444	35.8191	36.4916	34.623	33.6212	32.9951	34.2525	33.6671	34.3389	35.7951	34.123	35.0313	34.5805	35.6986	35.5059	35.1419	35.6905	34.4025	36.2366	35.6347	36.4154	34.5197	34.8345	35.8048	35.3332	35.3388	35.2682	34.7848
2237.43	4469.42	35.6874	35.8549	37.0042	35.9607	37.0311	36.9734	32.1612	33.8203	36.8258	37.4848	36.7755	37.7045	39.0037	38.0568	35.7316	37.8212	37.1527	35.7679	35.5482	34.4413	34.6865	36.0721	36.7324	34.8566	33.8761	33.2308	34.4949	33.9142	34.5826	36.0395	34.3592	35.2678	34.8198	35.9373	35.7494	35.3819	35.9371	34.6345	36.4701	35.8819	36.652	34.7601	35.0835	36.0516	35.5749	35.5898	35.5085	35.0292
2239.36	4465.57	35.9276	36.09	37.2739	36.2011	37.2667	37.1876	32.415	34.061	37.047	37.7099	37.0126	37.9546	39.2448	38.2887	35.9645	38.0527	37.4004	35.9973	35.7713	34.6772	34.9343	36.3213	36.9728	35.0896	34.1248	33.4663	34.7393	34.1442	34.8193	36.2804	34.5908	35.5018	35.056	36.175	35.9888	35.6248	36.1733	34.8618	36.7107	36.1204	36.8834	34.9866	35.3297	36.2946	35.8151	35.8322	35.7466	35.2705
2241.28	4461.73	36.174	36.3316	37.5534	36.4498	37.5071	37.4069	32.6595	34.295	37.2816	37.9439	37.2572	38.2131	39.4954	38.5237	36.2057	38.2921	37.6483	36.2299	35.9983	34.917	35.1883	36.578	37.2207	35.3335	34.3795	33.7087	34.9878	34.3804	35.0652	36.5247	34.8263	35.7401	35.2967	36.4168	36.2351	35.8667	36.4131	35.1022	36.9642	36.3559	37.13	35.2141	35.5795	36.5465	36.0596	36.0739	35.99	35.5148
2243.21	4457.89	36.4148	36.5665	37.8355	36.6923	37.7445	37.6165	32.8955	34.533	37.5205	38.182	37.4992	38.4558	39.7424	38.7521	36.4401	38.5298	37.8841	36.4597	36.2201	35.1551	35.4281	36.8342	37.4653	35.5678	34.6217	33.9461	35.2289	34.6375	35.3035	36.7665	35.059	35.9726	35.5379	36.6579	36.4805	36.1082	36.6545	35.3395	37.2084	36.5888	37.3719	35.4508	35.832	36.7989	36.2949	36.324	36.2307	35.7548
2245.14	4454.06	36.6573	36.8067	38.1247	36.9388	37.9843	37.8295	33.1343	34.7868	37.7675	38.4082	37.7456	38.702	39.9968	38.9896	36.6814	38.7717	38.1228	36.6964	36.4458	35.4021	35.6721	37.085	37.713	35.802	34.8902	34.1868	35.4738	34.8977	35.5509	37.0141	35.2962	36.2053	35.7871	36.9008	36.7267	36.3555	36.9046	35.577	37.4515	36.8331	37.6064	35.6879	36.0892	37.0577	36.5408	36.5678	36.4779	36.0074
2247.07	4450.24	36.9007	37.0464	38.4091	37.1818	38.2201	38.0484	33.3746	35.0271	38.0098	38.6349	37.9864	38.9474	40.2446	39.2239	36.9206	39.0107	38.3568	36.9293	36.6695	35.6506	35.9093	37.3321	37.9598	36.0413	35.1528	34.4267	35.7122	35.1405	35.7943	37.2554	35.5263	36.4337	36.0301	37.1426	36.969	36.5937	37.1535	35.8082	37.6961	37.0697	37.8409	35.909	36.3513	37.3118	36.7845	36.8102	36.7193	36.2511
2249	4446.42	37.1521	37.2929	38.6916	37.4289	38.4611	38.2866	33.6302	35.28	38.251	38.8654	38.2291	39.1996	40.4881	39.4615	37.1626	39.2508	38.6048	37.1647	36.902	35.906	36.1504	37.5889	38.2088	36.2924	35.4088	34.67	35.9546	35.3892	36.0429	37.5012	35.7546	36.6662	36.273	37.3835	37.2152	36.8284	37.4024	36.047	37.9574	37.3227	38.0746	36.1409	36.6161	37.5679	37.0306	37.0632	36.9654	36.4996
2250.93	4442.61	37.3986	37.5341	38.9652	37.6707	38.7019	38.5261	33.8824	35.5272	38.4851	39.1091	38.466	39.4501	40.7346	39.6945	37.3987	39.4861	38.8579	37.397	37.1276	36.1566	36.3751	37.8333	38.4541	36.5359	35.6623	34.9111	36.1949	35.6308	36.2872	37.7428	35.9804	36.8928	36.5186	37.62	37.4607	37.0682	37.6499	36.285	38.2095	37.5665	38.3038	36.3682	36.8721	37.8214	37.2675	37.3132	37.2075	36.7445
2252.86	4438.81	37.6492	37.7815	39.2346	37.9167	38.9478	38.7633	34.1331	35.7586	38.7284	39.3757	38.7097	39.6959	40.986	39.9351	37.6413	39.7261	39.1131	37.6324	37.3649	36.4036	36.6084	38.0818	38.7053	36.7756	35.9065	35.1564	36.4382	35.8713	36.5362	37.9894	36.2156	37.1255	36.7719	37.8563	37.7143	37.3099	37.906	36.5294	38.4723	37.8026	38.553	36.5908	37.1291	38.0804	37.5118	37.5802	37.4552	36.9953
2254.79	4435.01	37.9012	38.0274	39.493	38.1597	39.1849	38.9942	34.3835	35.9958	38.9757	39.6194	38.9501	39.9337	41.2276	40.1711	37.8822	39.9638	39.3558	37.8637	37.603	36.6471	36.8421	38.3269	38.9537	37.0159	36.1481	35.398	36.6795	36.1244	36.7806	38.2331	36.4462	37.3534	37.0192	38.0946	37.9613	37.544	38.155	36.7661	38.7274	38.0354	38.7928	36.8067	37.3827	38.3359	37.7588	37.8257	37.6934	37.2413
2256.71	4431.22	38.1546	38.2746	39.752	38.4074	39.4295	39.2447	34.6457	36.2363	39.2271	39.8483	39.1909	40.184	41.4747	40.413	38.128	40.2054	39.6012	38.0993	37.8433	36.8931	37.0851	38.57	39.2045	37.2654	36.3933	35.6454	36.9275	36.3804	37.0326	38.4826	36.679	37.5863	37.2746	38.3335	38.2132	37.7891	38.4145	37.0041	38.9746	38.2788	39.0314	37.0452	37.6432	38.5946	37.9974	38.0638	37.9386	37.4926
2258.64	4427.44	38.404	38.5176	40.008	38.6528	39.6732	39.4998	34.9066	36.4796	39.4754	40.0934	39.4303	40.442	41.7232	40.6491	38.3726	40.4472	39.8421	38.3343	38.082	37.1384	37.3274	38.8193	39.4549	37.519	36.6455	35.8899	37.1723	36.6243	37.276	38.7303	36.9132	37.8218	37.5269	38.5742	38.4642	38.0396	38.6715	37.2377	39.2181	38.5104	39.2724	37.2927	37.892	38.8497	38.2239	38.3142	38.1842	37.745
2260.57	4423.66	38.6595	38.7682	40.2701	38.904	39.9246	39.7521	35.1633	36.7342	39.7272	40.355	39.6783	40.6934	41.9782	40.8902	38.6246	40.6937	40.0898	38.5732	38.3225	37.3973	37.5838	39.0745	39.7108	37.7802	36.9051	36.1366	37.4246	36.8701	37.5273	38.9833	37.1561	38.0645	37.7815	38.8182	38.7222	38.2815	38.9231	37.4778	39.4753	38.7546	39.5215	37.5433	38.1407	39.1114	38.4649	38.5714	38.4342	38.0008
2262.5	4419.89	38.915	39.0188	40.5241	39.1503	40.1694	39.9938	35.4125	36.9756	39.9763	40.6045	39.9202	40.9246	42.228	41.1316	38.8706	40.9384	40.3377	38.8098	38.563	37.6544	37.8229	39.3224	39.9628	38.0441	37.1554	36.3807	37.677	37.121	37.7765	39.2357	37.397	38.3064	38.0292	39.0679	38.9796	38.5169	39.1797	37.7141	39.7397	39.0023	39.7617	37.7983	38.3898	39.3682	38.7194	38.8036	38.6767	38.2484
2264.43	4416.12	39.1719	39.2696	40.7763	39.3972	40.4166	40.2408	35.6609	37.2108	40.2233	40.8547	40.1639	41.1654	42.4784	41.3723	39.1182	41.1799	40.5904	39.0501	38.8054	37.9154	38.0559	39.5952	40.2143	38.2979	37.4054	36.6283	37.93	37.3803	38.0283	39.4905	37.6418	38.5562	38.278	39.322	39.2325	38.7655	39.4438	37.9524	39.9912	39.2339	40.0014	38.0502	38.6545	39.6257	38.9709	39.0343	38.9246	38.4982
2266.36	4412.36	39.4245	39.516	41.0262	39.6416	40.6623	40.4902	35.9113	37.4548	40.4623	41.0994	40.4081	41.416	42.7204	41.6112	39.3597	41.4199	40.8366	39.2896	39.0394	38.1674	38.2867	39.8485	40.4615	38.5435	37.6227	36.8757	38.1787	37.6349	38.2736	39.7385	37.8846	38.8018	38.5236	39.5742	39.4821	39.0148	39.6965	38.1846	40.2406	39.4626	40.2413	38.2869	38.92	39.8771	39.2012	39.2771	39.166	38.7435
2268.29	4408.61	39.6766	39.7654	41.2827	39.8926	40.9102	40.7395	36.1704	37.7138	40.7028	41.3351	40.6533	41.6687	42.9643	41.8565	39.6031	41.6642	41.0889	39.5327	39.2844	38.4179	38.5301	40.0915	40.7117	38.7987	37.8696	37.1277	38.4348	37.8903	38.5232	39.9881	38.1286	39.0463	38.7751	39.8255	39.7351	39.2613	39.9498	38.4231	40.4951	39.706	40.4893	38.528	39.181	40.1307	39.434	39.5494	39.4112	38.9943
2270.22	4404.87	39.9266	40.0118	41.5333	40.1402	41.1577	40.9857	36.4196	37.9622	40.9437	41.5825	40.8994	41.9068	43.2126	42.1005	39.8434	41.9057	41.3381	39.7745	39.5292	38.6615	38.7729	40.3424	40.9588	39.0465	38.1296	37.3781	38.6852	38.1321	38.7775	40.2366	38.3658	39.2929	39.0252	40.0777	39.9829	39.5026	40.1934	38.6619	40.7313	39.9558	40.7303	38.78	39.427	40.3827	39.6857	39.8109	39.6534	39.2449
2272.15	4401.13	40.1805	40.2606	41.7888	40.394	41.4094	41.2341	36.6606	38.2016	41.1908	41.8478	41.1496	42.1491	43.4581	42.3455	40.0899	42.1527	41.5854	40.0235	39.7716	38.9	39.0153	40.5828	41.2109	39.2985	38.3831	37.6334	38.9394	38.3789	39.0338	40.4876	38.6078	39.5488	39.2744	40.3283	40.2423	39.7541	40.4385	38.9095	40.9861	40.2116	40.9803	39.027	39.6824	40.6372	39.9434	40.0493	39.9012	39.4966
2274.07	4397.39	40.4327	40.5072	42.0456	40.6477	41.6629	41.4826	36.9158	38.448	41.4376	42.0971	41.4	42.3966	43.6988	42.5874	40.3321	42.3977	41.8296	40.2721	40.0158	39.143	39.2687	40.8234	41.4595	39.5481	38.6335	37.8886	39.191	38.6248	39.2822	40.7369	38.8515	39.7966	39.5194	40.5765	40.499	40.0069	40.685	39.1559	41.2422	40.4654	41.2249	39.277	39.9377	40.8878	40.1996	40.304	40.1471	39.7421
2276	4393.67	40.6852	40.757	42.3009	40.9042	41.9227	41.7286	37.1743	38.6993	41.6843	42.3494	41.6532	42.6519	43.9474	42.8388	40.5791	42.6461	42.0677	40.5276	40.265	39.3896	39.526	41.0782	41.7096	39.7958	38.8709	38.1509	39.4432	38.8669	39.5351	40.9879	39.1014	40.0456	39.773	40.8232	40.7493	40.2706	40.9322	39.404	41.485	40.7191	41.4774	39.5368	40.1895	41.1398	40.4525	40.5687	40.3968	39.9938
2277.93	4389.95	40.9374	41.0069	42.5477	41.1596	42.1829	41.9759	37.4132	38.9518	41.9247	42.5928	41.9081	42.9053	44.1966	43.0894	40.824	42.8954	42.3119	40.7874	40.5148	39.6369	39.7683	41.3326	41.9591	40.0457	39.1155	38.4128	39.6929	39.1033	39.7877	41.2344	39.3531	40.2925	40.0223	41.0689	40.9966	40.5354	41.174	39.6506	41.7306	40.9657	41.7385	39.7812	40.4312	41.381	40.7073	40.8111	40.6451	40.2388
2279.86	4386.23	41.1934	41.2608	42.7983	41.4208	42.4485	42.2247	37.668	39.2185	42.1681	42.8255	42.1697	43.1599	44.4498	43.3456	41.073	43.1496	42.5654	41.0497	40.7667	39.9017	40.0062	41.5925	42.2081	40.3023	39.3804	38.6805	39.9456	39.3506	40.0364	41.4835	39.6036	40.5448	40.2714	41.3237	41.2446	40.8031	41.4271	39.9101	41.9891	41.2254	42.0042	40.0247	40.6803	41.6263	40.9755	41.0594	40.9023	40.4899
2281.79	4382.53	41.4496	41.5183	43.0532	41.6798	42.7093	42.4802	37.9313	39.4947	42.4208	43.0783	42.4285	43.4083	44.7028	43.6001	41.3272	43.4063	42.8225	41.3051	41.021	40.1617	40.2591	41.8445	42.4603	40.555	39.6404	38.9484	40.1988	39.6117	40.2933	41.7387	39.853	40.7979	40.53	41.5776	41.5005	41.0676	41.6888	40.1701	42.2492	41.4893	42.2654	40.2793	40.9428	41.8802	41.2564	41.3125	41.1612	40.7416
2283.72	4378.82	41.7081	41.7759	43.318	41.9323	42.9549	42.7291	38.2043	39.7547	42.6943	43.3421	42.6782	43.6653	44.9534	43.8466	41.5874	43.6577	43.0837	41.5424	41.2675	40.4183	40.5022	42.0974	42.7259	40.8137	39.8915	39.2025	40.4688	39.8822	40.5546	42.0045	40.1036	41.0564	40.7988	41.8427	41.7704	41.3142	41.9646	40.4174	42.5055	41.7366	42.5095	40.5423	41.2197	42.1571	41.5158	41.5769	41.4155	41.01
2285.65	4375.13	41.9657	42.0249	43.5891	42.1644	43.169	42.9786	38.4737	39.9709	42.9771	43.5967	42.9051	43.9179	45.1949	44.0696	41.837	43.8948	43.3367	41.7505	41.4899	40.6835	40.7315	42.3705	42.9966	41.0661	40.1343	39.4276	40.7415	40.1485	40.8073	42.2699	40.3393	41.3129	41.0549	42.1126	42.0379	41.5337	42.233	40.6404	42.7463	41.9521	42.7187	40.7983	41.4886	42.45	41.732	41.8407	41.6592	41.2775
2287.58	4371.44	42.2282	42.2784	43.8646	42.3924	43.3751	43.234	38.7274	40.179	43.2698	43.8405	43.1253	44.1628	45.4405	44.2875	42.0867	44.1283	43.5903	41.9486	41.7085	40.9486	40.9654	42.6489	43.2712	41.3133	40.3813	39.6469	41.0174	40.4235	41.0576	42.5397	40.5757	41.5735	41.3118	42.3881	42.3119	41.7492	42.5015	40.8593	42.9896	42.1545	42.9185	41.0654	41.7647	42.7543	41.9456	42.0905	41.9062	41.5521
2289.5	4367.76	42.491	42.5311	44.1362	42.617	43.5766	43.4832	38.9904	40.3982	43.5608	44.0778	43.3427	44.41	45.6893	44.5023	42.338	44.3617	43.8409	42.1413	41.9304	41.2104	41.2044	42.9119	43.5481	41.5761	40.6252	39.867	41.2984	40.6939	41.3075	42.8111	40.8078	41.8318	41.5712	42.6656	42.5831	41.9642	42.7683	41.0801	43.2339	42.3296	43.118	41.3305	42.0378	43.061	42.1648	42.3277	42.1513	41.8267
2291.43	4364.08	42.7561	42.7859	44.4154	42.8419	43.7801	43.7241	39.2647	40.6152	43.8551	44.3317	43.5624	44.6615	45.9364	44.7138	42.5934	44.5973	44.0885	42.3328	42.1473	41.485	41.4366	43.1906	43.8295	41.837	40.8703	40.0833	41.5867	40.9833	41.5562	43.0889	41.0406	42.0893	41.8343	42.95	42.8554	42.1738	43.0448	41.3039	43.4896	42.5086	43.3173	41.5956	42.3139	43.3778	42.3777	42.5823	42.4007	42.1093
2293.36	4360.41	43.0195	43.0388	44.6988	43.0631	43.9788	43.9691	39.5297	40.8312	44.1584	44.5995	43.7731	44.9026	46.18	44.9219	42.8489	44.8315	44.3442	42.515	42.3607	41.7674	41.6548	43.464	44.1089	42.0799	41.1126	40.2887	41.8702	41.2848	41.8094	43.3689	41.2677	42.3491	42.1024	43.2372	43.1275	42.3807	43.3181	41.5189	43.7301	42.6949	43.5096	41.8497	42.5956	43.6998	42.5748	42.8409	42.6437	42.392
2295.29	4356.75	43.2866	43.2938	44.9793	43.2871	44.172	44.2194	39.7852	41.056	44.4675	44.8644	43.9893	45.1526	46.4252	45.131	43.1104	45.0682	44.603	42.6973	42.5735	42.0421	41.8873	43.7429	44.3908	42.3359	41.3509	40.4951	42.1565	41.5867	42.0621	43.651	41.4973	42.6134	42.3759	43.5256	43.4031	42.5869	43.5923	41.7348	43.9471	42.8947	43.6956	42.1101	42.8768	44.0242	42.7782	43.0986	42.8857	42.6743
2297.22	4353.09	43.5492	43.5452	45.262	43.502	44.3576	44.4723	40.0366	41.2622	44.7744	45.1193	44.201	45.4093	46.6649	45.3336	43.3644	45.3014	44.8587	42.8743	42.7826	42.3131	42.1236	44.0368	44.6729	42.5973	41.5885	40.7011	42.4451	41.8782	42.3113	43.9292	41.7218	42.8737	42.6427	43.8215	43.6891	42.7869	43.8692	41.9442	44.1741	43.0769	43.8784	42.3865	43.1439	44.3461	42.9775	43.3415	43.1263	42.9522
2299.15	4349.44	43.8091	43.796	45.5484	43.7122	44.5368	44.7105	40.2917	41.4346	45.0873	45.3631	44.4031	45.6567	46.9103	45.5312	43.6165	45.5289	45.1206	43.044	42.9861	42.5863	42.3472	44.3247	44.955	42.8568	41.8329	40.9047	42.7373	42.1669	42.5551	44.2102	41.9461	43.1315	42.905	44.1126	43.9738	42.9835	44.151	42.1526	44.4184	43.2345	44.065	42.6666	43.4148	44.6755	43.1854	43.561	43.3665	43.2346
2301.08	4345.79	44.0696	44.0486	45.8355	43.9227	44.7123	44.9374	40.5479	41.6107	45.402	45.6103	44.6046	45.8867	47.1597	45.7231	43.8718	45.7551	45.3767	43.2106	43.1864	42.8603	42.5774	44.6219	45.2381	43.1192	42.0687	41.0985	43.0282	42.4591	42.8019	44.4899	42.168	43.3876	43.1618	44.4071	44.241	43.1785	44.4303	42.3577	44.6603	43.3918	44.2496	42.9274	43.6955	45.0076	43.3872	43.7978	43.5994	43.5203
2303.01	4342.15	44.3378	44.3079	46.1368	44.1358	44.8821	45.1824	40.8331	41.8097	45.7341	45.8682	44.8111	46.1303	47.4076	45.9147	44.1386	45.9816	45.6285	43.3674	43.3891	43.1526	42.8323	44.916	45.5352	43.3869	42.3131	41.2865	43.3286	42.7714	43.0599	44.7816	42.3907	43.6481	43.4326	44.7164	44.5229	43.3706	44.7233	42.5738	44.9143	43.5664	44.4154	43.2036	43.9943	45.365	43.5781	44.0652	43.8459	43.8238
2304.94	4338.52	44.6118	44.5636	46.4537	44.322	45.0153	45.4263	41.1176	41.9707	46.0992	46.1438	44.9887	46.3858	47.6492	46.0788	44.4022	46.1935	45.8831	43.4798	43.5645	43.4539	43.0514	45.2085	45.8487	43.6415	42.5375	41.4406	43.6456	43.0985	43.3149	45.0872	42.6009	43.9143	43.7129	45.0396	44.8088	43.5274	45.0253	42.7662	45.1442	43.7029	44.5487	43.4929	44.3053	45.7602	43.7345	44.3334	44.0834	44.135
2306.86	4334.89	44.8828	44.8129	46.783	44.4901	45.1216	45.6464	41.3867	42.1012	46.4896	46.3987	45.1357	46.6239	47.8939	46.2233	44.666	46.3954	46.1446	43.5583	43.7151	43.7575	43.2366	45.5134	46.1708	43.8941	42.7497	41.5702	43.9765	43.4457	43.5597	45.4037	42.7999	44.1776	43.9923	45.3681	45.1036	43.6553	45.3419	42.9358	45.3696	43.8135	44.6502	43.7714	44.6217	46.1782	43.8656	44.5774	44.3095	44.4584
2308.79	4331.27	45.1454	45.0546	47.1128	44.6543	45.2193	45.8532	41.6484	42.2424	46.8712	46.6251	45.279	46.851	48.1337	46.3594	44.9242	46.596	46.4023	43.6313	43.8565	44.0583	43.4236	45.8167	46.4834	44.136	42.9729	41.6946	44.3044	43.7968	43.7968	45.7121	42.9839	44.4274	44.2579	45.6877	45.4048	43.7741	45.6513	43.0933	45.6033	43.8838	44.748	44.047	44.9373	46.5906	43.9945	44.773	44.5305	44.7787
2310.72	4327.65	45.3991	45.2855	47.4283	44.8246	45.3321	46.0664	41.9142	42.3874	47.2093	46.8567	45.4322	47.0784	48.3697	46.4941	45.1719	46.7983	46.6519	43.7284	44.0023	44.3307	43.6276	46.1165	46.7799	44.3696	43.181	41.8308	44.6161	44.1228	44.0293	46.0042	43.1651	44.6676	44.5111	45.9979	45.6863	43.9148	45.9351	43.2527	45.8291	43.9516	44.8594	44.312	45.2336	46.9731	44.138	44.9905	44.7594	45.0888
2312.65	4324.04	45.6564	45.5251	47.7392	45.0141	45.4827	46.2768	42.1878	42.5598	47.5128	47.1055	45.6096	47.309	48.6044	46.6686	45.4142	47.0174	46.9134	43.8707	44.1781	44.5955	43.8305	46.4166	47.0697	44.5955	43.3944	41.997	44.9165	44.425	44.2578	46.2868	43.3681	44.9055	44.7608	46.3067	45.9626	44.0848	46.2051	43.4348	46.0641	44.0696	45.0145	44.5834	45.5202	47.3216	44.3268	45.2514	44.9962	45.3949
2314.58	4320.44	45.9288	45.791	48.0729	45.2299	45.6551	46.5089	42.463	42.749	47.8705	47.3815	45.8078	47.5575	48.8636	46.8726	45.6977	47.26	47.1843	44.0293	44.3839	44.8924	44.0633	46.7372	47.3811	44.8658	43.6483	42.1775	45.2392	44.7672	44.5244	46.6005	43.6004	45.1729	45.0447	46.6384	46.2475	44.2775	46.5354	43.6532	46.3271	44.2586	45.1783	44.8742	45.8393	47.7035	44.5171	45.5007	45.2566	45.7388
2316.51	4316.84	46.205	46.0589	48.4397	45.4085	45.7498	46.7255	42.7529	42.8907	48.3139	47.6487	45.959	47.8099	49.1223	47.0106	45.9965	47.4843	47.4464	44.1021	44.5403	45.2137	44.3065	47.0639	47.7291	45.1487	43.8761	42.2974	45.5967	45.1817	44.7862	46.942	43.8037	45.4435	45.3475	46.9995	46.5383	44.4016	46.8969	43.8293	46.5786	44.3639	45.2745	45.1724	46.179	48.1616	44.6407	45.7314	45.5065	46.0974
2318.44	4313.25	46.4686	46.2916	48.826	45.5125	45.7461	46.9067	43.0411	42.9502	48.7844	47.8693	46.03	48.023	49.3535	47.0603	46.2592	47.6538	47.7036	44.0629	44.6103	45.5324	44.4931	47.4113	48.0887	45.3825	44.0364	42.331	45.973	45.5937	45.0054	47.2781	43.9424	45.6851	45.6244	47.3727	46.8406	44.4445	47.2439	43.9288	46.7985	44.316	45.2871	45.4516	46.5137	48.6827	44.6876	45.9582	45.7187	46.4563
2320.37	4309.67	46.7156	46.493	49.1963	45.5812	45.7162	47.0533	43.2869	42.9559	49.2146	48.065	46.0671	48.1944	49.5717	47.0836	46.4789	47.7944	47.9213	43.9987	44.6519	45.8313	44.5952	47.7579	48.4298	45.593	44.1932	42.3344	46.3265	45.9763	45.2021	47.5954	44.0426	45.8962	45.8536	47.7258	47.1313	44.4562	47.5651	43.9902	46.9752	44.2493	45.2469	45.7163	46.8513	49.1944	44.6995	46.1881	45.8914	46.8166
2322.29	4306.09	46.9535	46.6949	49.5284	45.6988	45.7588	47.21	43.5271	43.016	49.5805	48.2804	46.1552	48.3904	49.7899	47.1577	46.6866	47.954	48.1541	44.0162	44.7268	46.1056	44.7073	48.0549	48.7325	45.8119	44.3711	42.3945	46.6456	46.3147	45.421	47.8934	44.1581	46.1078	46.0808	48.0489	47.4084	44.5173	47.8542	44.0861	47.165	44.2254	45.2709	45.9621	47.1662	49.6344	44.7818	46.409	46.0783	47.1533
2324.22	4302.51	47.2164	46.9342	49.8578	45.8844	45.8868	47.4119	43.808	43.1902	49.9205	48.5159	46.3137	48.6499	50.0223	47.3145	46.9427	48.1609	48.4358	44.1275	44.8802	46.3879	44.927	48.3198	49.0367	46.0398	44.581	42.5261	46.9738	46.6318	45.6576	48.1936	44.3483	46.3528	46.3482	48.3643	47.6954	44.6438	48.1453	44.2579	47.4075	44.2915	45.3967	46.2071	47.4908	50.0398	44.9537	46.6416	46.3031	47.4977
2326.15	4298.95	47.4837	47.1892	50.2119	46.075	46.0102	47.6447	44.1118	43.3684	50.2818	48.7741	46.4805	48.8967	50.2746	47.481	47.2423	48.39	48.7013	44.233	45.0593	46.688	45.18	48.5877	49.3682	46.2734	44.7892	42.6588	47.325	46.9729	45.9137	48.5235	44.5677	46.612	46.6331	48.7097	47.9805	44.7855	48.4778	44.4628	47.6696	44.4021	45.5169	46.5247	47.8526	50.4785	45.1209	46.8779	46.5553	47.8856
2328.08	4295.38	47.7169	47.4031	50.5678	46.2088	46.0691	47.8085	44.365	43.4501	50.636	48.9763	46.5835	49.0938	50.4988	47.5775	47.4803	48.5785	48.9394	44.2718	45.1619	46.9808	45.3393	48.8951	49.6874	46.5013	44.9443	42.7348	47.6555	47.3149	46.1335	48.8299	44.7125	46.8291	46.8675	49.0307	48.2308	44.8717	48.7731	44.5812	47.9001	44.4167	45.5825	46.8133	48.1927	50.9163	45.1917	47.0936	46.7645	48.2295
2330.01	4291.83	47.9391	47.5916	50.8691	46.3373	46.1511	47.9479	44.5852	43.5307	50.9283	49.1629	46.6796	49.2714	50.6989	47.6813	47.6591	48.7412	49.1486	44.3341	45.2474	47.2459	45.4588	49.1952	49.9582	46.7034	45.0983	42.8269	47.9487	47.6071	46.3366	49.0864	44.833	47.0214	47.0584	49.3186	48.4544	44.9736	49.0307	44.6759	48.0916	44.4677	45.6489	46.9982	48.4707	51.2788	45.2599	47.3073	46.9509	48.524
2331.94	4288.28	48.188	47.8206	51.1253	46.5378	46.3376	48.1662	44.8194	43.7252	51.1752	49.391	46.8685	49.4778	50.9221	47.8815	47.8774	48.9558	49.3718	44.5163	45.4305	47.4961	45.6752	49.4579	50.2096	46.9409	45.3358	43.0123	48.2143	47.8699	46.5509	49.3318	45.0298	47.2425	47.2891	49.5751	48.6991	45.1671	49.3032	44.8643	48.3231	44.6567	45.8161	47.1996	48.7106	51.5721	45.4029	47.5499	47.1773	48.7969
2333.87	4284.73	48.4471	48.0764	51.3915	46.7834	46.5598	48.4291	45.0858	43.9364	51.4575	49.6525	47.1054	49.7373	51.1643	48.1138	48.1573	49.2071	49.6308	44.7479	45.6638	47.7397	45.9291	49.7231	50.4702	47.212	45.6003	43.2323	48.4913	48.19	46.8044	49.6043	45.2813	47.4971	47.5675	49.8462	48.9931	45.3831	49.6023	45.1088	48.5754	44.8652	46.0537	47.5131	48.9721	51.8671	45.6385	47.8329	47.4435	49.0989
2335.8	4281.2	48.6973	48.3134	51.6817	46.9761	46.6999	48.6171	45.3494	44.1002	51.7649	49.9159	47.2757	49.983	51.3878	48.283	48.4038	49.4106	49.8643	44.8912	45.8331	47.9979	46.104	49.9982	50.7465	47.4429	45.8167	43.3832	48.7891	48.517	47.0412	49.8833	45.4775	47.7273	47.8279	50.1333	49.2606	45.5259	49.8928	45.2802	48.7804	44.9815	46.1976	47.7562	49.2629	52.2023	45.8281	48.0645	47.6611	49.4082
2337.72	4277.66	48.9277	48.5321	51.9685	47.1518	46.838	48.7758	45.5761	44.2558	52.0525	50.1379	47.4284	50.1777	51.6075	48.4465	48.6298	49.5983	50.092	45.0033	45.9883	48.2471	46.2814	50.2404	51.0104	47.6877	46.0051	43.5266	49.0817	48.8236	47.2712	50.1495	45.6472	47.9465	48.065	50.4136	49.5023	45.6791	50.1675	45.4419	49.0234	45.1009	46.3409	47.9643	49.5364	52.5426	45.9928	48.2853	47.8663	49.7037
2339.65	4274.14	49.1447	48.7271	52.2213	47.3023	46.961	48.9775	45.8089	44.4126	52.3152	50.3217	47.5718	50.3335	51.7996	48.5893	48.8292	49.7697	50.3054	45.1047	46.1308	48.4747	46.4727	50.46	51.2621	47.9315	46.2001	43.6632	49.3503	49.0704	47.468	50.3916	45.7994	48.1523	48.2646	50.6659	49.7281	45.8236	50.4094	45.5907	49.2341	45.2063	46.4487	48.2283	49.7789	52.8702	46.1175	48.4766	48.0333	49.9466
2341.58	4270.62	49.3338	48.8936	52.3923	47.4563	47.1001	49.1879	45.9772	44.5961	52.4911	50.4848	47.72	50.5137	51.9619	48.7316	48.9853	49.9261	50.4885	45.2498	46.2703	48.6837	46.5674	50.6801	51.4546	48.1252	46.3811	43.8183	49.5473	49.2639	47.6496	50.5822	45.9548	48.3455	48.4214	50.8585	49.9094	45.958	50.5648	45.7251	49.3761	45.3303	46.5588	48.4377	49.9734	53.0947	46.2653	48.6309	48.1752	50.1173
2343.51	4267.1	49.4704	48.99	52.3892	47.6503	47.3502	49.3395	46.0626	44.8017	52.4307	50.6252	47.9016	50.7005	52.0644	48.9364	48.9975	50.0617	50.5968	45.5519	46.436	48.7874	46.5597	50.7921	51.4946	48.2486	46.5969	44.0809	49.5815	49.228	47.7848	50.6287	46.0952	48.4839	48.456	50.8973	50.0138	46.2071	50.5338	45.8664	49.4215	45.5926	46.782	48.479	50.0232	53.021	46.4561	48.7658	48.2731	50.0942
2345.44	4263.59	49.6895	49.1929	52.3073	48.08	47.9476	49.6815	46.2532	45.2642	52.2457	50.8819	48.3539	50.992	52.268	49.4315	49.0611	50.3524	50.776	46.2263	46.8744	48.8873	46.7644	50.8424	51.5011	48.4903	46.9522	44.6545	49.5792	49.097	48.0199	50.666	46.4435	48.7348	48.5862	50.9008	50.1714	46.7707	50.5367	46.2403	49.5933	46.2646	47.3759	48.5964	50.0375	52.7606	46.9659	49.0029	48.5188	50.035
2347.37	4260.09	50.0953	49.7304	52.5199	48.7623	48.7762	50.3082	46.7074	46.0377	52.4906	51.3611	49.1098	51.467	52.7269	50.1944	49.6253	50.9267	51.2083	47.0467	47.6403	49.2113	47.5273	51.0904	51.7709	48.9535	47.4794	45.4276	49.8354	49.3732	48.523	50.9902	47.1703	49.2242	49.1179	51.1627	50.5389	47.5572	50.9159	47.0057	50.1442	47.1984	48.2503	49.0727	50.312	52.7952	47.7584	49.4634	49.0852	50.3151
2349.3	4256.59	50.4832	50.2275	53.0244	49.157	49.1095	50.741	47.1751	46.4303	53.154	51.7999	49.5157	51.8425	53.1535	50.5718	50.2663	51.3659	51.6456	47.2963	48.0777	49.6591	48.1699	51.492	52.2407	49.3444	47.8552	45.7587	50.3151	49.9783	48.9558	51.4769	47.6719	49.6576	49.6671	51.6525	50.9591	47.9065	51.4757	47.5387	50.6375	47.5666	48.6453	49.5816	50.7633	53.3312	48.143	49.8948	49.5625	50.8409
2351.23	4253.1	50.7485	50.4479	53.6718	49.1042	48.8282	50.7779	47.4925	46.2531	53.9095	52.0176	49.3862	52.0122	53.3946	50.3987	50.5894	51.4783	51.9263	46.926	47.9664	50.0825	48.3072	51.966	52.7555	49.5612	47.9377	45.527	50.8833	50.6466	49.1612	51.9538	47.674	49.8668	49.9803	52.2063	51.3017	47.6943	51.9972	47.4998	50.8658	47.2076	48.3564	49.939	51.2931	54.2265	47.9799	50.1593	49.7403	51.4277
2353.16	4249.61	50.9602	50.5698	54.3321	48.9556	48.4437	50.6741	47.7724	46.0138	54.5688	52.1128	49.151	52.1272	53.5803	50.099	50.7777	51.4919	52.1363	46.465	47.712	50.4321	48.3005	52.4125	53.2417	49.7395	47.9163	45.1884	51.4321	51.26	49.2897	52.3878	47.5358	49.9682	50.1988	52.7325	51.5981	47.3958	52.4387	47.307	51.0381	46.7334	47.9333	50.2458	51.8499	55.1747	47.7379	50.3628	49.8171	51.9841
2355.08	4246.13	51.1633	50.6942	54.926	48.8535	48.1408	50.6417	48.0587	45.8153	55.1197	52.268	48.969	52.2365	53.7727	49.867	50.949	51.5131	52.3041	46.0975	47.4938	50.7585	48.2819	52.7895	53.6712	49.9201	47.9674	44.9228	51.9164	51.7789	49.4157	52.7599	47.4186	50.0539	50.3822	53.1797	51.8925	47.1386	52.8211	47.1323	51.2015	46.275	47.5767	50.5059	52.37	56.0368	47.5335	50.5917	49.87	52.4219
2357.01	4242.66	51.3539	50.8315	55.3986	48.8406	47.977	50.6796	48.2948	45.7016	55.5461	52.4443	48.9129	52.3385	53.9697	49.7694	51.1119	51.5654	52.4616	45.9036	47.39	51.0639	48.258	53.1459	54.03	50.0772	48.0917	44.7844	52.3143	52.1599	49.5701	53.0734	47.3867	50.1724	50.5521	53.543	52.1593	47.0042	53.1513	47.054	51.4017	45.9797	47.3954	50.7192	52.7814	56.6913	47.3712	50.8231	49.9666	52.8197
2358.94	4239.19	51.5433	50.9721	55.7269	48.9244	47.9957	50.7192	48.4961	45.7576	55.8019	52.6162	48.9709	52.472	54.1366	49.8098	51.2394	51.6839	52.6619	45.9181	47.4286	51.2773	48.2993	53.4277	54.3126	50.2729	48.2306	44.8198	52.5924	52.4479	49.7509	53.3154	47.4482	50.3151	50.7031	53.8018	52.3809	47.0319	53.4031	47.0915	51.5919	45.9173	47.4062	50.8931	53.0653	57.0902	47.3525	50.9842	50.1054	53.121
2360.87	4235.73	51.7408	51.148	55.9021	49.1438	48.2266	50.8758	48.6934	45.9461	55.9287	52.7834	49.1602	52.6699	54.3086	50.0205	51.397	51.8784	52.8812	46.1572	47.6246	51.4612	48.4849	53.6368	54.5023	50.4482	48.3543	45.0476	52.7756	52.624	49.9494	53.4999	47.6275	50.5044	50.8716	53.9899	52.5501	47.256	53.5808	47.2623	51.78	46.0953	47.6205	51.0804	53.2584	57.2565	47.5746	51.1236	50.3039	53.32
2362.8	4232.27	51.9426	51.334	55.969	49.4166	48.5644	51.1508	48.8812	46.2477	55.9605	52.9253	49.4335	52.8987	54.4901	50.3125	51.5285	52.0914	53.0819	46.524	47.87	51.622	48.6915	53.7968	54.6174	50.6017	48.5587	45.3711	52.8709	52.6564	50.1539	53.6125	47.8672	50.7217	50.9973	54.0905	52.7005	47.5356	53.675	47.5093	51.9383	46.4509	47.9224	51.2461	53.3722	57.2363	47.9378	51.3049	50.4944	53.3646
2364.73	4228.82	52.1427	51.5312	55.9215	49.7547	49.033	51.4508	49.0155	46.663	55.8819	53.1293	49.7981	53.1394	54.6808	50.7046	51.6595	52.3388	53.2607	47.039	48.2264	51.7439	48.9307	53.8933	54.6486	50.7702	48.8666	45.8172	52.8856	52.6254	50.362	53.6784	48.1754	50.9521	51.1421	54.1045	52.8442	47.9635	53.7043	47.8231	52.0896	46.9905	48.3974	51.3838	53.4027	57.0309	48.3914	51.5667	50.7225	53.3389
2366.66	4225.37	52.3417	51.7491	55.8171	50.1514	49.5888	51.7681	49.1242	47.114	55.6977	53.3995	50.2222	53.3734	54.8531	51.1733	51.7856	52.6149	53.4037	47.6526	48.6736	51.8391	49.2014	53.8939	54.6397	50.9644	49.2283	46.3537	52.8514	52.5785	50.5865	53.712	48.5389	51.1942	51.2924	54.0682	52.9506	48.4858	53.6925	48.1821	52.2572	47.6	48.9707	51.4751	53.3662	56.7084	48.83	51.7965	50.9472	53.2606
2368.59	4221.93	52.5338	51.9775	55.6737	50.5925	50.2152	52.1354	49.2597	47.6049	55.4637	53.6563	50.7052	53.6343	55.027	51.706	51.9184	52.9164	53.5526	48.3371	49.1532	51.8811	49.4961	53.8481	54.6031	51.1902	49.5826	46.9524	52.791	52.456	50.8254	53.7174	48.95	51.4388	51.4363	54.0103	53.0708	49.0737	53.6754	48.619	52.4224	48.3085	49.6172	51.5791	53.2903	56.3246	49.3311	51.9805	51.1994	53.153
2370.51	4218.49	52.7202	52.2019	55.5343	51.0429	50.8761	52.517	49.4097	48.1354	55.2235	53.8488	51.2118	53.907	55.2155	52.2393	52.0483	53.235	53.7138	49.0647	49.6621	51.9167	49.7485	53.8312	54.5698	51.4412	49.8771	47.5756	52.7337	52.2687	51.0638	53.7076	49.3542	51.6587	51.5944	53.9455	53.176	49.658	53.6376	49.0838	52.6275	49.0612	50.2744	51.6969	53.2126	55.937	49.8787	52.1703	51.4611	53.0585
2372.44	4215.06	52.899	52.4238	55.417	51.4981	51.5412	52.8553	49.5671	48.7235	55.0023	54.0264	51.7354	54.1649	55.4107	52.7922	52.1931	53.5622	53.8934	49.8049	50.1818	51.9738	50.0393	53.8479	54.5425	51.6677	50.1986	48.209	52.6914	52.15	51.3124	53.7174	49.7508	51.8805	51.7588	53.9068	53.2629	50.2623	53.6187	49.5693	52.8893	49.8197	50.9206	51.804	53.1698	55.5735	50.4569	52.3994	51.7288	52.9967
2374.37	4211.64	53.0864	52.6502	55.3446	51.9484	52.1825	53.1749	49.7262	49.2948	54.8202	54.2445	52.2477	54.4264	55.6213	53.331	52.3539	53.8974	54.0788	50.516	50.6833	52.0565	50.3825	53.897	54.5398	51.8799	50.5456	48.8207	52.6685	52.0513	51.566	53.7497	50.149	52.1126	51.9148	53.8796	53.3694	50.8572	53.6341	50.0319	53.1525	50.5469	51.57	51.9186	53.1851	55.2698	51.022	52.6491	51.9993	52.9409
2376.3	4208.22	53.276	52.885	55.3192	52.3946	52.7986	53.5138	49.9115	49.8445	54.6932	54.4876	52.7469	54.683	55.8346	53.8367	52.5361	54.2267	54.2566	51.1896	51.1672	52.1517	50.7327	53.9484	54.5706	52.1382	50.8825	49.4125	52.6853	51.9798	51.8261	53.8067	50.5399	52.3416	52.0823	53.8937	53.4963	51.4149	53.6957	50.4912	53.4257	51.2382	52.1999	52.0676	53.2471	55.036	51.5741	52.8866	52.2883	52.928
2378.23	4204.81	53.4719	53.1292	55.3435	52.8417	53.398	53.8454	50.1269	50.3978	54.6172	54.7462	53.2363	54.9526	56.0595	54.3238	52.7416	54.5585	54.4482	51.8372	51.6411	52.2686	51.0664	54.0185	54.6304	52.3942	51.2187	49.9825	52.7355	51.9478	52.0891	53.8867	50.9227	52.567	52.2687	53.9334	53.643	51.9541	53.7974	50.9514	53.7053	51.8907	52.7897	52.2242	53.3428	54.865	52.1023	53.1195	52.582	52.9722
2380.16	4201.4	53.6729	53.3881	55.4137	53.2968	53.9919	54.1562	50.3618	50.9363	54.5787	54.9872	53.7274	55.2348	56.3098	54.8145	52.9754	54.8998	54.6569	52.4643	52.1136	52.4158	51.4464	54.1129	54.7132	52.6449	51.53	50.5379	52.8129	51.979	52.3649	53.994	51.3056	52.8005	52.4834	54.0084	53.8162	52.507	53.9337	51.4179	54.0056	52.5182	53.3704	52.3863	53.4655	54.75	52.6191	53.3837	52.8941	53.0643
2382.09	4198	53.8853	53.6521	55.5303	53.7305	54.5493	54.4444	50.6137	51.4451	54.5768	55.2016	54.194	55.5024	56.5633	55.2789	53.2239	55.2404	54.8689	53.049	52.5655	52.568	51.84	54.2211	54.8308	52.8957	51.8353	51.0587	52.9253	52.0646	52.6467	54.1346	51.678	53.0343	52.7098	54.1029	53.9929	53.026	54.0922	51.8708	54.328	53.1185	53.9215	52.5725	53.6229	54.692	53.1108	53.6737	53.2024	53.1838
2384.02	4194.6	54.0992	53.9054	55.6833	54.112	55.0255	54.721	50.8503	51.8903	54.6338	55.4246	54.6027	55.7499	56.8113	55.6831	53.4719	55.5577	55.0849	53.549	52.9688	52.7336	52.1939	54.3641	54.9814	53.1328	52.1225	51.5087	53.0739	52.1878	52.9181	54.3009	52.017	53.2669	52.939	54.2398	54.1757	53.4631	54.2704	52.2687	54.6283	53.6401	54.3969	52.7873	53.8111	54.7044	53.5455	53.9538	53.5006	53.3338
2385.95	4191.21	54.3142	54.1451	55.8637	54.4264	55.4	54.9788	51.0872	52.2494	54.7539	55.6537	54.9379	55.9858	57.0471	56.0195	53.7067	55.8343	55.2975	53.9454	53.3044	52.9255	52.4875	54.5414	55.1574	53.3594	52.383	51.8731	53.2502	52.3519	53.1672	54.4851	52.3084	53.4949	53.1681	54.4047	54.3716	53.8204	54.4544	52.5935	54.8893	54.0435	54.7792	52.9924	54.0063	54.794	53.9018	54.2178	53.7686	53.511
2387.87	4187.83	54.5287	54.3706	56.06	54.6912	55.6908	55.1981	51.3241	52.5408	54.9175	55.8773	55.2138	56.2139	57.263	56.2908	53.9305	56.0771	55.5079	54.2505	53.5822	53.129	52.7353	54.7301	55.3522	53.5769	52.6163	52.1674	53.4469	52.5448	53.4	54.6823	52.5597	53.7129	53.393	54.5963	54.5802	54.1138	54.6524	52.864	55.1302	54.3478	55.0766	53.195	54.2153	54.947	54.1948	54.4618	54.0122	53.7151
2389.8	4184.45	54.7446	54.5855	56.2652	54.9247	55.9298	55.4074	51.555	52.7843	55.1099	56.0931	55.4539	56.4307	57.4684	56.5159	54.1416	56.2993	55.7218	54.5	53.8234	53.3399	52.9547	54.9349	55.5593	53.7949	52.843	52.4174	53.6575	52.7379	53.6198	54.8863	52.7884	53.9293	53.6058	54.7948	54.7951	54.3542	54.8542	53.0982	55.3544	54.592	55.3227	53.4233	54.4233	55.1331	54.4466	54.6766	54.2362	53.9231
2391.73	4181.07	54.9578	54.7963	56.471	55.145	56.1499	55.6294	51.7793	52.9982	55.3174	56.2911	55.6744	56.6317	57.6717	56.7267	54.3456	56.5066	55.9236	54.7214	54.0472	53.5488	53.1504	55.1495	55.7685	54.015	53.0492	52.6489	53.8717	52.9424	53.8384	55.0962	53.0033	54.1452	53.818	55.0065	55.0122	54.5777	55.0605	53.3212	55.5738	54.811	55.5312	53.6486	54.6341	55.3382	54.6707	54.8861	54.456	54.1362
2393.66	4177.7	55.1718	55.0047	56.6839	55.3586	56.3615	55.8369	51.9975	53.212	55.5196	56.4873	55.8837	56.8359	57.8755	56.9345	54.548	56.7129	56.1169	54.9339	54.2634	53.7694	53.3595	55.3645	55.9805	54.2411	53.2605	52.8721	54.0869	53.1596	54.0578	55.3097	53.2107	54.361	54.0301	55.2152	55.2347	54.7975	55.2741	53.5311	55.7816	55.0188	55.7403	53.8579	54.8538	55.549	54.8842	55.1104	54.6688	54.3457
2395.59	4174.34	55.3819	55.2115	56.8942	55.5705	56.5687	56.0349	52.22	53.4298	55.7239	56.6928	56.0958	57.0464	58.0775	57.1398	54.7539	56.9178	56.3068	55.1423	54.472	53.9885	53.5856	55.5745	56.1898	54.4502	53.4665	53.0952	54.3049	53.3774	54.2773	55.5221	53.4166	54.5786	54.2437	55.4323	55.4537	55.0108	55.4888	53.7388	55.991	55.2377	55.9499	54.072	55.079	55.7602	55.098	55.3289	54.8809	54.5529
2397.52	4170.98	55.5942	55.4239	57.1069	55.7841	56.7777	56.2352	52.4479	53.6496	55.9358	56.908	56.3052	57.2585	58.2826	57.3454	54.966	57.1249	56.5126	55.3516	54.6836	54.1921	53.8052	55.7792	56.3993	54.6571	53.6775	53.3194	54.5222	53.5815	54.493	55.7361	53.6254	54.7915	54.4554	55.648	55.6658	55.2164	55.7025	53.9462	56.2048	55.4549	56.1517	54.2911	55.2994	55.9725	55.3121	55.5303	55.0937	54.7596
2399.45	4167.63	55.8095	55.636	57.3163	55.9981	56.9866	56.4558	52.6805	53.883	56.1449	57.119	56.5121	57.4647	58.4855	57.5481	55.1754	57.3271	56.7166	55.5593	54.8954	54.4028	54.0172	55.9707	56.6096	54.8614	53.8976	53.5367	54.7349	53.7909	54.7055	55.9494	53.8346	55.0047	54.6671	55.8604	55.8816	55.4281	55.916	54.1535	56.4108	55.6563	56.3484	54.4954	55.5157	56.1818	55.5197	55.7275	55.3086	54.9744
2401.38	4164.28	56.0227	55.8437	57.5225	56.2054	57.191	56.6551	52.9011	54.1036	56.3424	57.3231	56.7179	57.66	58.6776	57.7456	55.3755	57.5246	56.9139	55.766	55.1008	54.6139	54.2304	56.1721	56.8184	55.0703	54.1089	53.7509	54.9493	54.0138	54.91	56.1588	54.0386	55.2153	54.8735	56.0658	56.0964	55.6443	56.1248	54.357	56.6144	55.8619	56.5419	54.689	55.7274	56.3898	55.7249	55.9461	55.5151	55.1847
2403.3	4160.94	56.2283	56.0457	57.7246	56.4084	57.3922	56.8412	53.1129	54.296	56.5354	57.5146	56.9215	57.855	58.8646	57.9448	55.5703	57.7163	57.108	55.9649	55.3014	54.8131	54.4299	56.3807	57.0232	55.2719	54.3068	53.966	55.1593	54.2126	55.1148	56.365	54.24	55.4258	55.0725	56.2723	56.3048	55.8537	56.3272	54.5554	56.8117	56.0584	56.7417	54.9007	55.9426	56.5933	55.9364	56.1701	55.7215	55.3886
2405.23	4157.6	56.4331	56.2441	57.9271	56.6098	57.5923	57.0376	53.3278	54.4986	56.7277	57.6992	57.121	58.0615	59.0544	58.1427	55.7651	57.9085	57.2991	56.1646	55.5009	55.0281	54.6134	56.5989	57.2292	55.4682	54.4916	54.1787	55.3671	54.4016	55.319	56.5697	54.4364	55.6297	55.2708	56.4851	56.516	56.0494	56.5224	54.7479	57.0045	56.2547	56.9404	55.1107	56.1503	56.7976	56.1524	56.3742	55.9249	55.5886
2407.16	4154.27	56.6344	56.4404	58.1245	56.8107	57.7878	57.2507	53.5394	54.6988	56.9155	57.8874	57.3197	58.2645	59.2475	58.3359	55.9577	58.101	57.4864	56.3601	55.7017	55.2403	54.7946	56.8184	57.4332	55.6662	54.6829	54.3883	55.5759	54.6046	55.5252	56.7755	54.6291	55.8358	55.4721	56.6933	56.7204	56.2562	56.7204	54.9449	57.2097	56.4599	57.1287	55.3135	56.3518	57.0029	56.3546	56.5628	56.1276	55.7945
2409.09	4150.94	56.8401	56.6424	58.3256	57.0098	57.9843	57.4399	53.756	54.9085	57.1034	58.0942	57.522	58.4625	59.4448	58.5287	56.1525	58.2943	57.6816	56.5564	55.9037	55.4464	54.9962	57.0203	57.6415	55.8767	54.896	54.6007	55.7849	54.8115	55.7317	56.984	54.8272	56.0424	55.6707	56.9025	56.9242	56.4694	56.9255	55.1516	57.4081	56.6613	57.326	55.517	56.5606	57.2074	56.5473	56.7648	56.3317	56.0002
2411.02	4147.62	57.044	56.8432	58.527	57.2151	58.1856	57.6253	53.9624	55.1202	57.2978	58.3016	57.7218	58.656	59.6418	58.7258	56.3522	58.4851	57.8838	56.7544	56.1039	55.6485	55.2039	57.2025	57.8494	56.0881	55.1048	54.8132	55.9896	55.0153	55.9386	57.1924	55.0316	56.2469	55.8742	57.1002	57.1347	56.6718	57.1336	55.3638	57.5988	56.8685	57.5185	55.7202	56.766	57.4167	56.7493	56.973	56.5366	56.21
2412.95	4144.31	57.248	57.044	58.733	57.4234	58.3885	57.8237	54.18	55.3316	57.5067	58.4942	57.9235	58.8598	59.8365	58.924	56.5525	58.6828	58.0876	56.9558	56.3021	55.8429	55.4046	57.3938	58.0551	56.2973	55.3138	55.0263	56.1949	55.217	56.1454	57.3982	55.2351	56.4547	56.0816	57.3042	57.3415	56.877	57.339	55.568	57.7929	57.0796	57.7147	55.9261	56.9752	57.6278	56.9583	57.1742	56.7396	56.4228
2414.88	4141	57.4506	57.2426	58.9371	57.6306	58.5886	58.0386	54.399	55.547	57.7161	58.6753	58.1289	59.0691	60.0285	59.1249	56.7552	58.8807	58.2766	57.153	56.5016	56.0456	55.6	57.5935	58.2603	56.4963	55.5072	55.2372	56.3997	55.4269	56.3524	57.6056	55.4398	56.6644	56.2856	57.4983	57.5529	57.0947	57.5397	55.7674	57.9857	57.289	57.9195	56.1246	57.1947	57.8367	57.1565	57.3836	56.9481	56.6322
2416.81	4137.69	57.6555	57.4452	59.1399	57.8355	58.7858	58.2216	54.6064	55.7466	57.9094	58.8677	58.3297	59.2691	60.2254	59.3238	56.9563	59.071	58.4696	57.3486	56.7006	56.2548	55.8016	57.7918	58.4654	56.6903	55.6972	55.4475	56.6025	55.6309	56.5559	57.8127	55.6417	56.8712	56.4877	57.7095	57.7675	57.3005	57.7435	55.9634	58.1864	57.4898	58.1138	56.3205	57.4051	58.0442	57.3534	57.5934	57.1561	56.8397
2418.74	4134.39	57.8556	57.6429	59.336	58.0376	58.978	58.4012	54.8199	55.9325	58.101	59.0761	58.5239	59.4598	60.4146	59.5144	57.1549	59.2549	58.6611	57.5397	56.8919	56.4562	55.9914	57.9949	58.6638	56.8787	55.9062	55.6547	56.8026	55.824	56.7586	58.018	55.8405	57.075	56.6821	57.9031	57.9713	57.4995	57.9397	56.1598	58.3811	57.6833	58.305	56.5131	57.5972	58.2487	57.5577	57.7964	57.3603	57.0449
2420.66	4131.1	58.0566	57.8392	59.531	58.233	59.1683	58.5975	55.0289	56.1309	58.2977	59.2796	58.7216	59.6505	60.5964	59.7029	57.3437	59.4405	58.8504	57.7313	57.0806	56.6613	56.1703	58.1917	58.8629	57.0625	56.107	55.861	57.0003	56.0142	56.9584	58.2161	56.0355	57.2759	56.8745	58.1036	58.1739	57.6994	58.1298	56.3502	58.5654	57.8857	58.4931	56.7003	57.7966	58.4466	57.7514	57.9837	57.5588	57.2407
2422.59	4127.81	58.2528	58.0318	59.7193	58.4285	59.3557	58.7937	55.2252	56.326	58.4838	59.4615	58.91	59.8477	60.7799	59.8951	57.5259	59.6206	59.0492	57.9187	57.2693	56.8536	56.3515	58.3764	59.0581	57.2558	56.294	56.0627	57.1922	56.2138	57.1528	58.4111	56.2241	57.4722	57.0689	58.2875	58.3721	57.8993	58.3269	56.5368	58.7545	58.085	58.6848	56.8858	58.004	58.6405	57.934	58.1722	57.7583	57.4405
2424.52	4124.52	58.451	58.2221	59.9083	58.6233	59.5442	58.9755	55.4312	56.5227	58.6671	59.632	59.0961	60.0546	60.9677	60.0853	57.711	59.7994	59.2467	58.1078	57.4531	57.0455	56.5371	58.5719	59.2536	57.4713	56.4994	56.2648	57.3884	56.4047	57.3511	58.6087	56.4134	57.6681	57.2632	58.4842	58.5713	58.0989	58.5246	56.7185	58.9377	58.2789	58.8693	57.0773	58.2036	58.8428	58.1212	58.3738	57.9582	57.6397
2426.45	4121.25	58.6477	58.4102	60.0957	58.8171	59.7334	59.1643	55.637	56.7244	58.8623	59.8254	59.289	60.2454	61.1507	60.2712	57.8966	59.9777	59.435	58.2987	57.6386	57.2422	56.7182	58.7623	59.4456	57.6775	56.6999	56.4672	57.5817	56.5902	57.5454	58.8066	56.6034	57.8676	57.4521	58.6779	58.774	58.3029	58.7218	56.9036	59.1274	58.4638	59.0579	57.274	58.3914	59.0401	58.3196	58.5729	58.1584	57.8412
2428.38	4117.97	58.8499	58.6068	60.2876	59.0131	59.9232	59.3579	55.8361	56.9404	59.0631	60.0349	59.4776	60.4274	61.3398	60.4674	58.0831	60.1657	59.6272	58.49	57.8299	57.4377	56.8966	58.9627	59.6406	57.8732	56.9069	56.6697	57.771	56.7765	57.7435	59.0066	56.7969	58.0717	57.642	58.8692	58.9722	58.513	58.9196	57.0993	59.3139	58.6654	59.249	57.4684	58.5812	59.236	58.5102	58.7597	58.3561	58.0378
2430.31	4114.7	59.0478	58.8006	60.479	59.2088	60.1128	59.5522	56.0398	57.1495	59.2554	60.2218	59.6648	60.6213	61.5307	60.6605	58.273	60.3519	59.8093	58.6794	58.0164	57.6387	57.0792	59.1671	59.834	58.068	57.1136	56.8726	57.9622	56.9664	57.943	59.2063	56.9957	58.2728	57.8391	59.0519	59.1701	58.7196	59.1163	57.2993	59.4959	58.8771	59.4362	57.6584	58.7747	59.4338	58.7059	58.9416	58.5586	58.2337
2432.24	4111.44	59.2472	58.9949	60.6766	59.4049	60.3069	59.7462	56.2613	57.3536	59.4386	60.4044	59.8576	60.8265	61.7148	60.8503	58.4665	60.5325	59.9998	58.872	58.2011	57.8397	57.2688	59.369	60.0293	58.2614	57.3193	57.0766	58.1509	57.1626	58.1431	59.4038	57.198	58.4736	58.037	59.2433	59.3709	58.9091	59.3175	57.4962	59.6842	59.0757	59.6286	57.8369	58.9754	59.6328	58.9108	59.1462	58.7669	58.4278
2434.17	4108.18	59.4449	59.1855	60.8666	59.605	60.4975	59.9293	56.4749	57.5526	59.6245	60.5947	60.0488	61.0264	61.8965	61.0361	58.6567	60.7116	60.1918	59.0601	58.38	58.0336	57.4592	59.5633	60.2198	58.4455	57.5187	57.276	58.3396	57.3597	58.3338	59.5994	57.3971	58.6698	58.2316	59.4307	59.5624	59.0992	59.5147	57.6928	59.8739	59.2776	59.8229	58.0198	59.176	59.8317	59.1014	59.3484	58.9726	58.6296
2436.09	4104.93	59.6456	59.3771	61.0546	59.7981	60.6794	60.1236	56.6701	57.7469	59.8068	60.7781	60.2343	61.2167	62.0791	61.2208	58.8429	60.8895	60.3916	59.245	58.5601	58.2353	57.6463	59.7479	60.4087	58.6329	57.7287	57.4732	58.5261	57.5514	58.5264	59.7907	57.5945	58.8629	58.4241	59.6176	59.7549	59.3007	59.708	57.8768	60.0549	59.4776	60.0059	58.1983	59.3684	60.0229	59.2806	59.54	59.1661	58.8287
2438.02	4101.68	59.8381	59.5642	61.2395	59.9859	60.8588	60.307	56.8561	57.9362	59.9792	60.9608	60.4137	61.3995	62.26	61.4025	59.0214	61.0606	60.5895	59.428	58.737	58.4245	57.838	59.9233	60.5914	58.8201	57.9414	57.6702	58.7083	57.7371	58.716	59.9776	57.7869	59.0536	58.6102	59.8027	59.943	59.499	59.8958	58.0588	60.2285	59.6587	60.1897	58.3663	59.5391	60.2033	59.4604	59.7193	59.3571	59.0161
2439.95	4098.44	60.0293	59.7526	61.4211	60.1724	61.0425	60.4938	57.0488	58.1206	60.1576	61.1375	60.5938	61.5873	62.4411	61.5876	59.1935	61.2346	60.7772	59.6123	58.9119	58.6149	58.0248	60.096	60.7736	59.0134	58.1399	57.867	58.8867	57.9268	58.9052	60.1651	57.9719	59.2448	58.7916	59.9838	60.1346	59.6854	60.0755	58.2433	60.3986	59.8507	60.379	58.5471	59.7112	60.3797	59.6298	59.8903	59.5434	59.1939
2441.88	4095.2	60.2205	59.9363	61.5959	60.3582	61.2205	60.6871	57.2504	58.2927	60.3386	61.3077	60.7716	61.7802	62.6154	61.7686	59.3663	61.4094	60.956	59.7919	59.0865	58.8063	58.1929	60.2702	60.9518	59.2043	58.3405	58.0588	59.063	58.1047	59.094	60.3522	58.1539	59.4308	58.9735	60.1629	60.3228	59.8717	60.2603	58.4235	60.5759	60.0453	60.5654	58.7366	59.8913	60.5557	59.8053	60.0516	59.7303	59.3776
2443.81	4091.97	60.4175	60.1199	61.7787	60.5432	61.3969	60.8839	57.4439	58.4807	60.5133	61.4958	60.9467	61.9782	62.7878	61.9435	59.543	61.5832	61.1375	59.9764	59.2606	58.9875	58.3613	60.4514	61.1302	59.3879	58.5551	58.2506	59.2419	58.2813	59.2821	60.5374	58.3417	59.6167	59.1559	60.3313	60.5059	60.0627	60.4482	58.6032	60.7515	60.2325	60.7462	58.9136	60.083	60.7413	60.0016	60.2171	59.9238	59.5677
2445.74	4088.74	60.6096	60.3013	61.9594	60.7317	61.575	61.0647	57.6329	58.6692	60.6841	61.687	61.1225	62.1568	62.9631	62.1233	59.7189	61.7536	61.3219	60.1597	59.434	59.1666	58.54	60.6487	61.305	59.5768	58.7602	58.4428	59.422	58.467	59.4675	60.7226	58.5342	59.8024	59.3415	60.5074	60.6908	60.2499	60.6407	58.7892	60.9266	60.4127	60.9298	59.0812	60.2628	60.9295	60.2035	60.4036	60.1189	59.763
2447.67	4085.52	60.8067	60.4928	62.1418	60.9235	61.7595	61.2417	57.832	58.8678	60.8626	61.8612	61.304	62.3324	63.1433	62.3087	59.8955	61.9283	61.5196	60.3455	59.6099	59.3508	58.7215	60.8533	61.4841	59.7595	58.9683	58.6385	59.6074	58.6494	59.656	60.9099	58.7276	59.992	59.5303	60.6862	60.8804	60.4363	60.8312	58.9764	61.1133	60.6162	61.1226	59.2648	60.4446	61.1165	60.3896	60.5954	60.3113	59.9532
2449.6	4082.31	61.0003	60.6807	62.3243	61.1131	61.9411	61.4347	58.0295	59.0643	61.0388	62.0279	61.4823	62.5209	63.3175	62.4869	60.0768	62.103	61.7044	60.5298	59.7831	59.5389	58.8881	61.0421	61.6615	59.9395	59.1817	58.8312	59.7941	58.8448	59.8476	61.0984	58.9201	60.179	59.7176	60.8775	61.0672	60.6313	61.0154	59.1648	61.2971	60.8143	61.3136	59.4458	60.6292	61.3024	60.5677	60.7792	60.5044	60.1364
2451.53	4079.09	61.1939	60.867	62.5109	61.3009	62.1217	61.6333	58.2319	59.2507	61.2171	62.2131	61.6599	62.7153	63.4854	62.6634	60.2621	62.2779	61.8914	60.7124	59.9573	59.7377	59.0605	61.2301	61.8423	60.1293	59.3923	59.026	59.9807	59.035	60.0389	61.2865	59.1079	60.3647	59.9083	61.0551	61.2528	60.8288	61.2033	59.3491	61.4799	61.0039	61.5012	59.6165	60.8072	61.4854	60.7534	60.9572	60.6956	60.3119
2453.45	4075.89	61.3851	61.0508	62.6887	61.4851	62.2994	61.8196	58.4205	59.4321	61.3979	62.4017	61.8366	62.9017	63.6574	62.8379	60.4386	62.4469	62.0803	60.8934	60.1211	59.9257	59.2397	61.396	62.0167	60.3105	59.5976	59.219	60.1609	59.2081	60.225	61.4689	59.2928	60.544	60.09	61.2358	61.4334	61.0118	61.3896	59.5277	61.6659	61.1867	61.6837	59.7932	60.9805	61.6645	60.9416	61.1393	60.885	60.4929
2455.38	4072.68	61.5765	61.2317	62.8636	61.6644	62.474	61.9956	58.6096	59.6106	61.5841	62.577	62.0058	63.0771	63.8324	63.0118	60.6042	62.6168	62.2589	61.0765	60.2858	60.1088	59.4178	61.5691	62.188	60.4908	59.7875	59.4058	60.3407	59.381	60.4058	61.6466	59.4753	60.7234	60.2615	61.4094	61.6116	61.1901	61.5666	59.6983	61.8447	61.3553	61.869	59.9673	61.1588	61.8404	61.1244	61.3213	61.0641	60.6813
2457.31	4069.49	61.7631	61.4049	63.0346	61.8414	62.6465	62.1768	58.8001	59.7926	61.7623	62.748	62.17	63.2419	64.0041	63.1838	60.7681	62.7835	62.431	61.2507	60.4499	60.2904	59.591	61.7529	62.3554	60.672	59.978	59.5915	60.5196	59.5657	60.5869	61.8227	59.6538	60.9005	60.4324	61.5918	61.7929	61.375	61.7423	59.8718	62.0097	61.5259	62.05	60.1295	61.3307	62.0089	61.2971	61.4897	61.239	60.8646
2459.24	4066.3	61.9499	61.582	63.2073	62.0176	62.8177	62.3675	58.9883	59.971	61.926	62.9078	62.339	63.4187	64.1758	63.3535	60.9334	62.9506	62.6045	61.42	60.6157	60.4676	59.7597	61.9342	62.5226	60.8599	60.1794	59.7745	60.7008	59.7551	60.7641	61.9969	59.8257	61.0729	60.6101	61.7633	61.9669	61.548	61.9164	60.0464	62.1815	61.7152	62.2174	60.3052	61.496	62.1761	61.4737	61.645	61.4136	61.0345
2461.17	4063.11	62.1263	61.7551	63.3807	62.1907	62.9895	62.5401	59.1685	60.1486	62.0875	63.0871	62.5052	63.5982	64.3396	63.5202	61.0987	63.1214	62.7771	61.5988	60.7824	60.6413	59.9192	62.1055	62.6854	61.0358	60.3717	59.9552	60.8761	59.9251	60.9428	62.1724	59.9948	61.2467	60.7854	61.9389	62.1401	61.7199	62.0865	60.2208	62.3568	61.891	62.3895	60.4903	61.6708	62.3487	61.6404	61.805	61.5876	61.1992
2463.1	4059.93	62.3072	61.9279	63.5639	62.3687	63.1632	62.7143	59.3572	60.3378	62.2495	63.2799	62.6686	63.7787	64.5072	63.6885	61.2655	63.2912	62.96	61.7815	60.95	60.8242	60.0801	62.2738	62.8548	61.2119	60.5635	60.1422	61.0556	60.1083	61.1241	62.3457	60.1681	61.422	60.9606	62.1154	62.3219	61.9017	62.2653	60.3964	62.5363	62.058	62.5682	60.6641	61.8505	62.5243	61.7976	61.992	61.7628	61.367
2465.03	4056.75	62.4914	62.1003	63.7413	62.5491	63.3388	62.8955	59.5433	60.527	62.4075	63.4456	62.8415	63.9433	64.6801	63.8579	61.4352	63.4559	63.1459	61.9579	61.1164	61.0061	60.2421	62.4487	63.0234	61.3871	60.7382	60.3301	61.2386	60.2938	61.3029	62.5163	60.3484	61.5988	61.1379	62.2886	62.4982	62.088	62.446	60.5754	62.7274	62.2329	62.7486	60.8451	62.0307	62.705	61.9705	62.1813	61.9512	61.5465
2466.96	4053.58	62.6738	62.2755	63.9196	62.7286	63.5204	63.0851	59.7202	60.711	62.5726	63.6211	63.0138	64.1046	64.8538	64.031	61.6092	63.6253	63.3194	62.1365	61.2887	61.1838	60.4183	62.6274	63.1932	61.5666	60.9196	60.5155	61.4249	60.4745	61.486	62.6955	60.5282	61.7713	61.3168	62.4639	62.6731	62.2637	62.6211	60.7575	62.9082	62.4154	62.9281	61.0313	62.2167	62.8843	62.1535	62.36	62.138	61.7239
2468.88	4050.41	62.8507	62.4493	64.0968	62.9078	63.6989	63.2539	59.9075	60.8871	62.7485	63.8047	63.1855	64.2819	65.0175	64.1953	61.7847	63.792	63.4767	62.3113	61.458	61.358	60.5951	62.7972	63.3627	61.7424	61.0999	60.6997	61.627	60.6568	61.6695	62.8763	60.7026	61.9403	61.4939	62.6485	62.8471	62.4341	62.8012	60.933	63.0915	62.5942	63.1022	61.2117	62.4023	63.0571	62.3349	62.5392	62.3191	61.9059
2470.81	4047.25	63.0311	62.6247	64.2725	63.0824	63.8749	63.4252	60.0956	61.0659	62.924	63.9836	63.3581	64.4607	65.1857	64.3613	61.9583	63.9601	63.6389	62.4855	61.6239	61.5339	60.7821	62.9672	63.5324	61.919	61.297	60.8817	61.8342	60.8394	61.8527	63.0538	60.864	62.1057	61.662	62.8478	63.0208	62.607	62.9753	61.0968	63.2956	62.7566	63.2861	61.3915	62.5782	63.2237	62.5142	62.7242	62.4958	62.0814
2472.74	4044.09	63.2072	62.7966	64.4442	63.2524	64.0484	63.6045	60.2692	61.2411	63.0796	64.1524	63.524	64.6188	65.3532	64.5242	62.126	64.1269	63.8037	62.6629	61.7837	61.7129	60.969	63.14	63.6979	62.0906	61.4748	61.066	62.0065	61.0115	62.0317	63.222	61.0188	62.2737	61.8261	63.0417	63.1912	62.7836	63.1409	61.2558	63.4742	62.912	63.46	61.5817	62.7497	63.3897	62.682	62.8982	62.6703	62.2522
2474.67	4040.94	63.3838	62.9673	64.6156	63.4182	64.2174	63.7752	60.4524	61.414	63.2312	64.3037	63.6863	64.7716	65.5165	64.6824	62.284	64.2946	63.964	62.8392	61.9485	61.8922	61.1322	63.3132	63.8614	62.2673	61.6312	61.2501	62.1477	61.1772	62.199	63.3826	61.1898	62.4446	61.9983	63.2003	63.3618	62.9583	63.3066	61.4053	63.6136	63.0752	63.6212	61.7665	62.926	63.5587	62.8366	63.062	62.8364	62.4189
2476.6	4037.79	63.552	63.1301	64.7863	63.5862	64.3843	63.9257	60.6411	61.5838	63.3829	64.4618	63.8499	64.9311	65.679	64.8376	62.4386	64.4556	64.126	63.0075	62.1081	62.0603	61.2768	63.4754	64.0198	62.4355	61.7693	61.4284	62.2888	61.3349	62.362	63.5403	61.3733	62.6159	62.1698	63.3279	63.5341	63.1226	63.4718	61.561	63.7466	63.2422	63.787	61.9153	63.1109	63.7275	62.9955	63.2345	63.005	62.5864
2478.53	4034.65	63.7225	63.2957	64.9636	63.7585	64.5543	64.0921	60.8253	61.7547	63.5313	64.6442	64.012	65.0955	65.8499	64.9966	62.5976	64.6184	64.2885	63.1773	62.2679	62.2241	61.4253	63.6543	64.1823	62.6118	61.9098	61.6078	62.4401	61.4901	62.5297	63.7008	61.5538	62.7899	62.343	63.4655	63.7119	63.2904	63.639	61.7257	63.8842	63.4144	63.948	62.0566	63.3019	63.9021	63.1656	63.4145	63.1668	62.7542
2480.46	4031.51	63.8866	63.4575	65.129	63.9298	64.7293	64.2563	61.0005	61.9353	63.6838	64.8287	64.1731	65.2418	66.0121	65.1529	62.7561	64.781	64.447	63.3484	62.4339	62.3904	61.5724	63.8215	64.3452	62.792	62.0788	61.7875	62.5976	61.6577	62.6979	63.8605	61.7278	62.9626	62.5198	63.6121	63.8845	63.4582	63.8055	61.8952	64.0459	63.5925	64.1182	62.2093	63.4893	64.0758	63.3442	63.5946	63.3304	62.9236
2482.39	4028.38	64.051	63.6236	65.2958	64.0944	64.9125	64.4025	61.1856	62.1043	63.8476	64.9848	64.3379	65.3951	66.1641	65.3107	62.924	64.9536	64.6067	63.5223	62.6072	62.5626	61.7211	63.9757	64.5169	62.9748	62.2868	61.967	62.7649	61.8261	62.8698	64.0252	61.9008	63.137	62.6965	63.7667	64.0555	63.6247	63.9698	62.0638	64.2217	63.7555	64.2835	62.3757	63.6587	64.2485	63.5128	63.7686	63.496	63.0921
2484.32	4025.25	64.2113	63.7855	65.4613	64.262	65.0884	64.5565	61.3747	62.2634	64.0127	65.1243	64.5055	65.5666	66.3127	65.4713	63.0963	65.124	64.7639	63.6971	62.7778	62.7356	61.883	64.1373	64.6903	63.1439	62.5038	62.1457	62.9404	62.0004	63.0451	64.1925	62.0717	63.3059	62.8681	63.9244	64.2267	63.7935	64.1408	62.2309	64.3879	63.9089	64.453	62.5417	63.8096	64.4103	63.6779	63.938	63.66	63.2689
2486.24	4022.13	64.3855	63.9532	65.6232	64.4318	65.2485	64.7347	61.5612	62.4337	64.1792	65.2862	64.6713	65.7433	66.4627	65.6248	63.2609	65.2863	64.9319	63.8726	62.9399	62.9107	62.0581	64.2997	64.8546	63.317	62.7109	62.3261	63.1195	62.1743	63.218	64.3593	62.2403	63.4709	63.0409	64.0987	64.3998	63.9621	64.3009	62.3991	64.5516	64.0732	64.6295	62.707	63.9585	64.5655	63.8433	64.104	63.8187	63.4431
2488.17	4019.01	64.567	64.1229	65.7843	64.5992	65.4023	64.9292	61.7371	62.6017	64.3436	65.4686	64.8353	65.918	66.6107	65.7831	63.4147	65.4417	65.0957	64.0389	63.0925	63.0751	62.2388	64.4757	65.0041	63.4914	62.8968	62.5041	63.2974	62.3573	63.3911	64.5279	62.4074	63.6366	63.2121	64.2745	64.5709	64.1343	64.4646	62.5653	64.7212	64.2343	64.7879	62.8777	64.1156	64.7212	64.0065	64.2552	63.9814	63.61
2490.1	4015.9	64.7538	64.2965	65.9507	64.7627	65.5566	65.1179	61.9043	62.7733	64.5057	65.6424	64.999	66.0849	66.7628	65.9471	63.5647	65.6013	65.2531	64.2019	63.2437	63.2386	62.3989	64.6562	65.1556	63.6472	63.056	62.6769	63.4782	62.5413	63.5597	64.6954	62.5697	63.8017	63.381	64.4516	64.736	64.3037	64.6255	62.7265	64.8931	64.387	64.9424	63.0518	64.2698	64.8754	64.1707	64.394	64.1434	63.7731
2492.03	4012.79	64.9247	64.461	66.1102	64.9212	65.7109	65.2903	62.0726	62.9352	64.6563	65.7867	65.1585	66.2376	66.9148	66.0983	63.7115	65.7568	65.4082	64.3615	63.3939	63.3991	62.5489	64.8168	65.3067	63.7979	63.223	62.8425	63.6618	62.7069	63.7248	64.8577	62.7232	63.9628	63.5437	64.6168	64.8967	64.4671	64.7802	62.8866	65.0638	64.5462	65.106	63.2213	64.4239	65.0308	64.3305	64.5417	64.3001	63.9377
2493.96	4009.69	65.091	64.6216	66.268	65.0789	65.8643	65.4579	62.2501	63.0994	64.8076	65.9215	65.3166	66.3892	67.0594	66.247	63.8594	65.9111	65.5616	64.5251	63.5531	63.5668	62.6936	64.98	65.4618	63.9584	63.3981	63.0121	63.8477	62.8706	63.8873	65.0182	62.8731	64.1219	63.6989	64.7913	65.0625	64.6338	64.9417	63.0383	65.2252	64.6828	65.2619	63.3815	64.589	65.1922	64.4988	64.7074	64.4488	64.0971
2495.89	4006.59	65.2542	64.7761	66.4296	65.2362	66.0154	65.6187	62.4116	63.2688	64.9672	66.0786	65.4733	66.5401	67.1974	66.3983	64.0081	66.0641	65.7081	64.686	63.707	63.7315	62.8297	65.1326	65.6173	64.1134	63.5518	63.1775	64.0349	63.0319	64.052	65.1791	63.0176	64.2739	63.8523	64.968	65.2197	64.7921	65.1077	63.1934	65.3949	64.8334	65.4135	63.5538	64.7646	65.3532	64.667	64.871	64.5984	64.2601
2497.82	4003.5	65.4194	64.9347	66.5946	65.393	66.1746	65.7715	62.5703	63.4387	65.1301	66.2505	65.6321	66.6965	67.3488	66.5529	64.157	66.2187	65.8675	64.8465	63.8628	63.8924	62.9781	65.2921	65.7757	64.2767	63.6989	63.341	64.2295	63.2018	64.2196	65.345	63.1581	64.4271	64.0097	65.1549	65.3792	64.94	65.2763	63.3534	65.5792	64.9951	65.5647	63.7366	64.9335	65.5155	64.8366	65.0318	64.7514	64.4217
2499.75	4000.41	65.5769	65.0869	66.7559	65.5551	66.3357	65.9276	62.736	63.6021	65.2822	66.4102	65.7909	66.8493	67.5052	66.7003	64.3092	66.373	66.015	65.0081	64.0249	64.0506	63.1458	65.46	65.9307	64.4409	63.8361	63.5078	64.4293	63.3711	64.3872	65.5096	63.2993	64.5818	64.1614	65.3423	65.5404	65.1048	65.4447	63.5241	65.7631	65.1387	65.7168	63.9107	65.1069	65.6839	64.996	65.2026	64.9113	64.5869
2501.67	3997.32	65.7356	65.2473	66.9208	65.7169	66.4994	66.0872	62.909	63.7632	65.4307	66.5712	65.9503	66.9947	67.6633	66.8517	64.4682	66.5331	66.1633	65.1712	64.1875	64.2162	63.3158	65.6282	66.0929	64.6058	63.965	63.6758	64.6325	63.5485	64.5591	65.6793	63.4425	64.7365	64.3135	65.539	65.6988	65.2786	65.6059	63.7	65.9433	65.2883	65.8717	64.0985	65.2942	65.8563	65.1465	65.3761	65.0727	64.7524
2503.6	3994.24	65.892	65.4087	67.0881	65.8812	66.6649	66.23	63.0794	63.9208	65.5835	66.727	66.1141	67.1425	67.8198	67.0029	64.6294	66.6924	66.3089	65.3329	64.3461	64.3761	63.479	65.7859	66.2583	64.7621	64.0981	63.8402	64.8406	63.72	64.7322	65.8508	63.585	64.8912	64.4673	65.7334	65.8602	65.4449	65.7671	63.8689	66.1169	65.4368	66.0251	64.302	65.4832	66.0261	65.3067	65.5504	65.2357	64.9188
2505.53	3991.17	66.0475	65.5636	67.2593	66.0493	66.8295	66.3706	63.2574	64.0852	65.7314	66.875	66.2777	67.2926	67.9755	67.1534	64.7941	66.8525	66.45	65.4962	64.5076	64.5393	63.6323	65.9464	66.428	64.911	64.235	64.0081	65.0413	63.8909	64.9085	66.0208	63.7266	65.0481	64.6234	65.9319	66.0254	65.6008	65.9277	64.0283	66.2857	65.5862	66.1805	64.4925	65.6655	66.2003	65.4778	65.7286	65.3955	65.0885
2507.46	3988.1	66.1894	65.7105	67.4185	66.2089	66.989	66.5077	63.4415	64.2459	65.8698	67.0321	66.4387	67.4331	68.1327	67.3002	64.9555	67.0076	66.5928	65.6514	64.6647	64.6969	63.7792	66.0923	66.5905	65.0688	64.353	64.1727	65.2306	64.0591	65.0686	66.1817	63.8667	65.199	64.7763	66.1216	66.1855	65.7564	66.0774	64.1838	66.4591	65.7324	66.3337	64.6649	65.8519	66.3766	65.6367	65.9117	65.5547	65.2561
2509.39	3985.03	66.3327	65.8603	67.584	66.3646	67.1486	66.643	63.6191	64.399	66.0191	67.1879	66.5981	67.5688	68.2904	67.4446	65.1101	67.1611	66.7365	65.8055	64.8176	64.8434	63.9243	66.2347	66.7533	65.2473	64.4513	64.3327	65.4106	64.2287	65.2206	66.3377	64.0095	65.3535	64.9245	66.3011	66.3452	65.9186	66.2296	64.3357	66.6313	65.8722	66.4924	64.8476	66.0431	66.554	65.7991	66.0971	65.7082	65.4137
2511.32	3981.97	66.4684	66.0026	67.7462	66.5198	67.3108	66.7598	63.7837	64.5497	66.1721	67.3422	66.7543	67.6959	68.4416	67.5832	65.2596	67.3118	66.8737	65.9591	64.9638	64.9864	64.0583	66.372	66.911	65.4176	64.5493	64.4893	65.5756	64.38	65.3752	66.4914	64.1482	65.5068	65.07	66.4639	66.4971	66.0836	66.3859	64.4806	66.7872	66.0118	66.6288	65.0296	66.2313	66.7281	65.9604	66.2698	65.8568	65.5701
2513.25	3978.92	66.603	66.144	67.9017	66.6731	67.4696	66.8708	63.9483	64.7154	66.3159	67.4986	66.9051	67.8299	68.5968	67.7216	65.4115	67.464	67.0087	66.1152	65.116	65.1374	64.1938	66.5049	67.0728	65.5834	64.6772	64.6487	65.7334	64.5329	65.5295	66.6451	64.2904	65.6591	65.2138	66.6282	66.6502	66.2393	66.5421	64.6231	66.9282	66.1631	66.7685	65.1794	66.4147	66.9036	66.1139	66.4506	66.0035	65.7212
2515.18	3975.86	66.7333	66.2808	68.0538	66.8254	67.6242	66.9906	64.1158	64.8703	66.4546	67.6356	67.0549	67.963	68.7451	67.86	65.5613	67.6122	67.1368	66.2645	65.2718	65.2886	64.3274	66.6495	67.2351	65.7404	64.7989	64.8051	65.893	64.6957	65.6816	66.7983	64.4379	65.809	65.3577	66.7797	66.7991	66.3925	66.6949	64.7702	67.0685	66.3278	66.9123	65.3229	66.593	67.0734	66.2578	66.6257	66.1515	65.8782
2517.1	3972.82	66.8698	66.4241	68.2094	66.9769	67.7826	67.1128	64.2798	65.023	66.5978	67.7555	67.2076	68.0987	68.8871	68.0053	65.7136	67.7629	67.263	66.4145	65.4312	65.441	64.4687	66.7993	67.3972	65.8904	64.9305	64.9623	66.0548	64.8432	65.841	66.9536	64.5819	65.9658	65.5092	66.9391	66.9512	66.5495	66.8448	64.9233	67.2008	66.4908	67.0561	65.4866	66.7726	67.2373	66.4023	66.7896	66.3031	66.0422
2519.03	3969.78	66.9981	66.5604	68.3633	67.1285	67.9391	67.2373	64.4428	65.1742	66.7407	67.8873	67.3634	68.2375	69.0235	68.1445	65.8666	67.9094	67.3963	66.5634	65.5863	65.5867	64.614	66.9358	67.5564	66.0382	65.0609	65.1167	66.2111	64.9876	65.9979	67.1056	64.7281	66.1202	65.6569	67.0912	67.1095	66.7005	66.9946	65.0798	67.3458	66.6298	67.2012	65.6463	66.95	67.3977	66.5542	66.9518	66.4623	66.2044
2520.96	3966.74	67.1399	66.7082	68.5205	67.2812	68.0941	67.3636	64.6199	65.3283	66.8879	68.0627	67.5181	68.3821	69.1619	68.2874	66.0229	68.0579	67.5477	66.7154	65.7378	65.7381	64.7721	67.0903	67.7189	66.1893	65.2048	65.2728	66.3709	65.1438	66.1509	67.2573	64.8856	66.2764	65.8058	67.2568	67.2681	66.8552	67.1474	65.2354	67.5089	66.7578	67.3498	65.7953	67.1197	67.558	66.7092	67.12	66.6162	66.3622
2522.89	3963.71	67.288	66.862	68.6723	67.4378	68.2453	67.5047	64.7803	65.4908	67.0418	68.2388	67.668	68.5326	69.3	68.4367	66.1775	68.2068	67.6997	66.8648	65.8851	65.8833	64.922	67.2407	67.8739	66.3307	65.3632	65.4307	66.5317	65.3056	66.3027	67.4133	65.0383	66.4317	65.959	67.4134	67.4204	67.0171	67.3016	65.3873	67.6674	66.9015	67.4956	65.9431	67.2843	67.7151	66.8668	67.2813	66.7718	66.5207
2524.82	3960.68	67.4356	67.0107	68.8191	67.5903	68.3925	67.647	64.9334	65.6437	67.1929	68.3641	67.8184	68.6812	69.4391	68.582	66.3274	68.3513	67.8445	67.0122	66.0333	66.0237	65.0612	67.3767	68.021	66.4865	65.5184	65.5885	66.6866	65.4578	66.4582	67.5657	65.185	66.5845	66.1096	67.5642	67.5724	67.1681	67.4486	65.5375	67.8172	67.0691	67.6283	66.0987	67.4376	67.8696	67.0218	67.4255	66.9236	66.6733
2526.75	3957.65	67.5745	67.1494	68.9563	67.7353	68.5324	67.7813	65.088	65.7766	67.334	68.4642	67.9646	68.8147	69.5711	68.7177	66.4681	68.486	67.9705	67.1529	66.1666	66.1628	65.1836	67.5111	68.1614	66.6335	65.6682	65.7374	66.8336	65.5943	66.6078	67.7109	65.3331	66.7313	66.2486	67.706	67.7139	67.313	67.5938	65.6828	67.9444	67.2201	67.7639	66.2391	67.5857	68.0187	67.1633	67.5603	67.0668	66.8217
2528.68	3954.64	67.7145	67.2871	69.0946	67.8762	68.6672	67.919	65.2379	65.9147	67.4781	68.5875	68.1055	68.9573	69.6992	68.8473	66.6008	68.62	68.0836	67.291	66.2973	66.3053	65.3094	67.6482	68.3036	66.7787	65.8191	65.88	66.9797	65.746	66.7484	67.8557	65.4725	66.8756	66.3832	67.8564	67.8533	67.4636	67.7453	65.8215	68.0679	67.3602	67.9064	66.3721	67.7347	68.1647	67.2882	67.709	67.2076	66.9729
2530.61	3951.62	67.852	67.4211	69.2278	68.0084	68.7963	68.0483	65.3806	66.0595	67.6165	68.7401	68.2369	69.0994	69.8187	68.9764	66.7269	68.7471	68.2011	67.4207	66.4236	66.4405	65.4375	67.7869	68.4365	66.9204	65.9542	66.021	67.124	65.8988	66.8879	67.9965	65.6001	67.0147	66.5135	68.0014	67.9904	67.611	67.8894	65.9589	68.1969	67.4918	68.0325	66.5126	67.8738	68.3063	67.4086	67.8601	67.3556	67.1197
2532.54	3948.61	67.9918	67.5554	69.3597	68.1428	68.9256	68.173	65.5265	66.1996	67.7448	68.8994	68.371	69.2338	69.9459	69.1083	66.8551	68.8733	68.3272	67.5529	66.5543	66.5803	65.5726	67.9301	68.5713	67.0614	66.0911	66.1659	67.2678	66.0343	67.0327	68.1377	65.732	67.1565	66.6446	68.1444	68.1332	67.7517	68.0243	66.0943	68.3323	67.6135	68.1575	66.6607	67.9968	68.4438	67.5501	67.9936	67.4954	67.2571
2534.46	3945.61	68.1269	67.6864	69.4879	68.2823	69.0543	68.3035	65.6668	66.325	67.8656	69.0209	68.5048	69.3605	70.0726	69.2375	66.9836	68.9976	68.4512	67.6852	66.6852	66.7173	65.6995	68.0452	68.7032	67.2024	66.2307	66.3087	67.4121	66.1647	67.1743	68.2791	65.8638	67.2979	66.7765	68.291	68.2729	67.8912	68.1549	66.2296	68.4724	67.7493	68.2848	66.7932	68.1389	68.5871	67.7038	68.1281	67.6327	67.3947
2536.39	3942.61	68.2633	67.8184	69.6258	68.4197	69.1857	68.4364	65.8121	66.4562	67.9896	69.1197	68.6373	69.4925	70.1945	69.367	67.111	69.1256	68.5931	67.8156	66.8148	66.8592	65.8264	68.1572	68.8335	67.3351	66.3672	66.4501	67.5591	66.3053	67.3151	68.4198	66.003	67.4353	66.9104	68.4301	68.4047	68.0383	68.2893	66.372	68.6099	67.899	68.4168	66.9123	68.2862	68.7357	67.839	68.2819	67.7737	67.5328
2538.32	3939.61	68.395	67.948	69.762	68.5523	69.3196	68.565	65.9596	66.5963	68.1214	69.2332	68.7695	69.635	70.3196	69.4974	67.2434	69.2526	68.7261	67.9436	66.938	66.9993	65.9386	68.2851	68.9663	67.4734	66.5076	66.5881	67.7022	66.4473	67.4555	68.5575	66.1447	67.5664	67.0483	68.5681	68.5309	68.1879	68.4335	66.5191	68.7396	68.0514	68.5581	67.0563	68.4157	68.8744	67.9692	68.4318	67.9142	67.6755
2540.25	3936.62	68.535	68.0846	69.8975	68.6867	69.4513	68.6824	66.1043	66.7493	68.2553	69.3834	68.9029	69.7735	70.4504	69.6313	67.378	69.3782	68.855	68.0736	67.0627	67.1258	66.0445	68.4141	69.0983	67.6065	66.6504	66.726	67.8384	66.5899	67.5939	68.6962	66.2823	67.6995	67.1822	68.7096	68.6646	68.3174	68.5727	66.6615	68.8786	68.1762	68.682	67.1996	68.5446	69.0112	68.0998	68.5567	68.0524	67.8135
2542.18	3933.63	68.6653	68.2136	70.0271	68.8231	69.5756	68.8034	66.246	66.8863	68.3829	69.5265	69.0364	69.8971	70.5755	69.7588	67.5058	69.4974	68.9812	68.2	67.1866	67.2481	66.1651	68.5435	69.2237	67.734	66.7826	66.8647	67.9722	66.7186	67.7242	68.829	66.4123	67.8354	67.3069	68.8488	68.7966	68.4465	68.7095	66.7969	69.0117	68.301	68.8083	67.3188	68.6849	69.1405	68.216	68.6622	68.1923	67.9483
2544.11	3930.65	68.7931	68.3401	70.1586	68.9566	69.6998	68.9281	66.3929	67.0087	68.5164	69.6464	69.1645	70.0166	70.7009	69.8848	67.6322	69.6203	69.0966	68.3273	67.3064	67.3806	66.2938	68.6818	69.3485	67.8585	66.9034	67.002	68.1079	66.856	67.8518	68.9565	66.5393	67.9686	67.433	68.9835	68.9269	68.5836	68.8494	66.9263	69.1381	68.4272	68.9397	67.442	68.8271	69.2732	68.3478	68.7917	68.3237	68.0848
2546.04	3927.67	68.9186	68.4624	70.2815	69.0824	69.8238	69.0528	66.5217	67.1268	68.6463	69.7573	69.2838	70.1355	70.8202	70.0033	67.7549	69.7377	69.2046	68.4477	67.4163	67.5054	66.4178	68.8126	69.4663	67.9751	67.0322	67.1323	68.2401	66.9785	67.9808	69.0838	66.6651	68.0939	67.5576	69.1178	69.0584	68.7169	68.9825	67.0529	69.2637	68.5621	69.0626	67.5771	68.9534	69.4024	68.4842	68.9513	68.4543	68.2107
2547.97	3924.7	69.0426	68.5833	70.3989	69.2069	69.9418	69.1663	66.6521	67.2563	68.758	69.8741	69.3978	70.2698	70.9349	70.1183	67.871	69.849	69.3235	68.5617	67.5285	67.631	66.5415	68.9299	69.5843	68.105	67.1885	67.2596	68.3664	67.1028	68.1077	69.2098	66.7857	68.2118	67.6759	69.2421	69.1821	68.8377	69.0994	67.174	69.3826	68.69	69.1796	67.7144	69.072	69.5277	68.5954	69.0871	68.5779	68.3329
2549.89	3921.73	69.1579	68.6952	70.5089	69.3266	70.0577	69.2751	66.7815	67.3726	68.8574	69.9964	69.5133	70.3913	71.0413	70.2292	67.9825	69.9562	69.4393	68.6711	67.6383	67.7598	66.6483	69.0331	69.6956	68.2248	67.3053	67.3846	68.4875	67.2289	68.2309	69.3307	66.8961	68.3307	67.7849	69.367	69.2918	68.9667	69.2186	67.2949	69.5058	68.8142	69.2941	67.8323	69.1877	69.6478	68.705	69.1872	68.6973	68.4559
2551.82	3918.77	69.2743	68.8104	70.6241	69.4453	70.1761	69.3887	66.9048	67.4905	68.9678	70.1117	69.6296	70.4985	71.151	70.3378	68.0919	70.0623	69.5578	68.7882	67.7541	67.8811	66.7527	69.139	69.8043	68.3534	67.4106	67.5138	68.6091	67.3473	68.3526	69.4484	67.0123	68.4493	67.8939	69.4823	69.4006	69.0833	69.3382	67.4166	69.6224	68.9237	69.4098	67.9431	69.3117	69.7629	68.833	69.3005	68.8167	68.5757
2553.75	3915.81	69.3899	68.9217	70.7397	69.5677	70.2904	69.5018	67.0236	67.6289	69.079	70.2261	69.7412	70.6043	71.2594	70.4507	68.1985	70.1658	69.6725	68.9024	67.8682	67.9838	66.8561	69.2491	69.9134	68.4735	67.5302	67.6419	68.7245	67.4746	68.469	69.5613	67.1258	68.5628	68.0068	69.605	69.5086	69.1926	69.4556	67.539	69.7368	69.03	69.5278	68.0655	69.4329	69.8759	68.9505	69.4269	68.938	68.6995
2555.68	3912.85	69.5088	69.036	70.8592	69.6853	70.4061	69.6116	67.1344	67.7586	69.1883	70.3489	69.8544	70.7208	71.3701	70.5615	68.31	70.2726	69.7881	69.0138	67.9838	68.0899	66.9613	69.359	70.0232	68.5833	67.669	67.767	68.8426	67.5969	68.5849	69.6741	67.2403	68.6759	68.1211	69.7193	69.6272	69.3069	69.5738	67.6629	69.8477	69.1467	69.6414	68.1908	69.5567	69.9931	69.0446	69.5536	69.0545	68.8256
2557.61	3909.9	69.6206	69.146	70.9711	69.7962	70.5188	69.7222	67.2505	67.8603	69.3039	70.4524	69.9673	70.8418	71.485	70.6675	68.42	70.3745	69.8873	69.1202	68.0928	68.1985	67.0743	69.4631	70.1257	68.6953	67.7898	67.8884	68.9615	67.715	68.7035	69.7884	67.3541	68.7838	68.2311	69.8389	69.739	69.4314	69.6893	67.785	69.964	69.2703	69.7558	68.2966	69.6717	70.11	69.1404	69.6708	69.1717	68.9402
2559.54	3906.95	69.7325	69.2565	71.086	69.9088	70.6301	69.8251	67.3742	67.9676	69.4294	70.5496	70.0739	70.9513	71.5921	70.7726	68.5304	70.4785	69.9902	69.2256	68.1967	68.3138	67.1796	69.5713	70.2274	68.8139	67.8953	68.0093	69.0758	67.8279	68.8246	69.9022	67.4688	68.8937	68.3479	69.9571	69.851	69.5579	69.8022	67.8999	70.0859	69.3756	69.865	68.4002	69.7793	70.2218	69.2538	69.7745	69.2834	69.0452
2561.47	3904.01	69.8353	69.3608	71.1916	70.0223	70.7379	69.9172	67.4869	68.072	69.539	70.6399	70.1718	71.04	71.6913	70.8736	68.6353	70.5814	70.0931	69.326	68.2967	68.4236	67.284	69.6646	70.3252	68.9152	67.9978	68.1252	69.1837	67.9355	68.9321	70.008	67.5778	68.9994	68.4579	70.0737	69.9568	69.6712	69.9144	68.005	70.1943	69.4915	69.9778	68.519	69.8838	70.328	69.3704	69.8841	69.3939	69.1544
2563.4	3901.07	69.9397	69.4657	71.2928	70.132	70.839	70.0182	67.599	68.1787	69.6278	70.7457	70.2712	71.1344	71.7978	70.9708	68.7331	70.6789	70.1869	69.4237	68.3954	68.5279	67.3891	69.7583	70.4192	69.0263	68.1069	68.2381	69.2877	68.0434	69.0371	70.1133	67.6795	69.1004	68.5607	70.1764	70.0483	69.771	70.0151	68.1048	70.2939	69.6048	70.0734	68.6245	69.9924	70.4312	69.4751	69.9952	69.5001	69.2618
2565.33	3898.14	70.0369	69.5596	71.3846	70.2279	70.939	70.1194	67.7129	68.2833	69.7094	70.8592	70.3643	71.2332	71.8944	71.0567	68.8245	70.7602	70.2825	69.5162	68.4897	68.6216	67.4726	69.8589	70.5042	69.1348	68.217	68.3451	69.3821	68.1575	69.1379	70.2112	67.7731	69.1992	68.6548	70.2732	70.1414	69.8746	70.1101	68.2007	70.3889	69.6928	70.1578	68.7123	70.0936	70.5238	69.5708	70.1022	69.6006	69.3625
2567.25	3895.21	70.1303	69.6478	71.4796	70.3221	71.0362	70.2132	67.8201	68.3874	69.7864	70.9465	70.4535	71.3369	71.9822	71.1433	68.9109	70.8419	70.3731	69.6093	68.5797	68.7163	67.5459	69.9483	70.5899	69.2321	68.3254	68.4498	69.4774	68.2546	69.231	70.3046	67.866	69.2962	68.7421	70.3718	70.236	69.9701	70.2019	68.2978	70.4715	69.7723	70.2545	68.8069	70.1823	70.6128	69.6513	70.2005	69.6912	69.455
2569.18	3892.29	70.2202	69.734	71.5685	70.4158	71.124	70.2941	67.9097	68.4739	69.8546	71.0129	70.5411	71.4288	72.0691	71.2278	68.9916	70.9215	70.4596	69.6952	68.668	68.8092	67.6191	70.0317	70.6731	69.3164	68.4085	68.5542	69.5694	68.342	69.3255	70.3971	67.9503	69.3856	68.8286	70.4604	70.3263	70.0555	70.2926	68.3924	70.5608	69.855	70.3426	68.9127	70.2681	70.7062	69.7321	70.297	69.7813	69.5427
2571.11	3889.37	70.3133	69.8259	71.6582	70.5066	71.2123	70.3759	68.0097	68.5594	69.9391	71.0826	70.6259	71.5016	72.1565	71.3076	69.0738	71.0039	70.5386	69.7793	68.7626	68.8984	67.6913	70.1165	70.755	69.4013	68.4932	68.6572	69.6613	68.4334	69.4202	70.4862	68.0339	69.4722	68.9159	70.5478	70.4185	70.1514	70.3837	68.4812	70.6584	69.9465	70.4259	68.9963	70.3566	70.7969	69.8151	70.3849	69.8704	69.6329
2573.04	3886.45	70.3947	69.9084	71.7427	70.5963	71.2999	70.4638	68.1042	68.6404	70.0349	71.1664	70.7039	71.572	72.2344	71.3851	69.1563	71.082	70.6035	69.8612	68.8433	68.9785	67.7542	70.1999	70.8291	69.4927	68.5814	68.7532	69.7469	68.5274	69.5102	70.5684	68.1194	69.5537	69.0012	70.6329	70.4996	70.2535	70.4697	68.5677	70.7454	70.0332	70.5175	69.0807	70.4465	70.8812	69.8928	70.4679	69.9646	69.7212
2574.97	3883.54	70.4788	69.992	71.8323	70.6822	71.3856	70.5532	68.1872	68.7202	70.1272	71.2656	70.7856	71.6633	72.3136	71.4692	69.2411	71.1635	70.6762	69.9447	68.9202	69.0551	67.8205	70.2964	70.9082	69.572	68.6782	68.849	69.8359	68.6065	69.5955	70.651	68.2086	69.636	69.09	70.7167	70.5862	70.3442	70.5528	68.6574	70.8348	70.1218	70.6088	69.1761	70.5518	70.9664	69.9869	70.5494	70.0562	69.8055
2576.9	3880.63	70.562	70.073	71.9194	70.7638	71.4737	70.628	68.2722	68.8118	70.2058	71.3529	70.8736	71.7561	72.4002	71.5483	69.3248	71.2414	70.7514	70.0237	69.0063	69.1253	67.913	70.3785	70.9883	69.6459	68.7628	68.9458	69.9271	68.6876	69.6796	70.7345	68.2929	69.7198	69.1806	70.8066	70.6741	70.4206	70.636	68.7473	70.92	70.202	70.6973	69.2644	70.6497	71.0502	70.0814	70.6234	70.1427	69.8874
2578.83	3877.73	70.6481	70.1556	71.9997	70.8451	71.5558	70.7025	68.3618	68.9039	70.2868	71.4175	70.9557	71.8289	72.4805	71.6204	69.4032	71.3175	70.822	70.1043	69.0858	69.2007	68.0052	70.4479	71.0638	69.7187	68.8298	69.0378	70.0097	68.7936	69.7646	70.8173	68.3709	69.804	69.2662	70.8906	70.7532	70.5009	70.7173	68.8282	70.9977	70.2654	70.7781	69.3369	70.7259	71.1294	70.1666	70.7073	70.2212	69.9737
2580.76	3874.83	70.723	70.2314	72.0708	70.9244	71.6307	70.7785	68.4417	68.9823	70.3476	71.4674	71.0273	71.8833	72.5481	71.6848	69.4718	71.3873	70.9032	70.1763	69.1545	69.2827	68.0795	70.5176	71.129	69.7904	68.906	69.1221	70.0883	68.8856	69.8433	70.8909	68.4445	69.882	69.3404	70.9646	70.8292	70.583	70.7942	68.8963	71.0721	70.334	70.8445	69.41	70.7948	71.1989	70.2401	70.8011	70.2979	70.0564
2582.68	3871.94	70.7928	70.3026	72.142	71.0023	71.7037	70.8613	68.5213	69.0678	70.3917	71.5393	71.0972	71.9544	72.617	71.7454	69.5389	71.453	70.9815	70.2445	69.2187	69.3629	68.1548	70.5855	71.192	69.87	68.9879	69.207	70.1611	68.9526	69.9159	70.9583	68.5158	69.9556	69.4109	71.0322	70.9018	70.6514	70.8612	68.9569	71.13	70.4155	70.9151	69.4913	70.8789	71.2678	70.3046	70.8912	70.3644	70.126
2584.61	3869.05	70.856	70.3654	72.2033	71.0727	71.769	70.9241	68.5938	69.1339	70.447	71.6142	71.1641	72.0263	72.6828	71.7989	69.598	71.5103	71.0426	70.3064	69.2799	69.4298	68.2135	70.6383	71.2507	69.943	69.0531	69.2847	70.2252	69.0194	69.9821	71.0227	68.5796	70.0216	69.4778	71.1015	70.9709	70.7207	70.9213	69.0215	71.1866	70.4794	70.979	69.5631	70.9467	71.3272	70.3615	70.9514	70.4282	70.1889
2586.54	3866.17	70.9179	70.424	72.2648	71.1336	71.8299	70.9874	68.6633	69.2017	70.5194	71.6794	71.2271	72.0856	72.7462	71.8514	69.6531	71.563	71.0949	70.3652	69.3426	69.4939	68.2582	70.6895	71.3091	70.0124	69.1068	69.3553	70.2919	69.09	70.0464	71.0835	68.6404	70.0871	69.5431	71.161	71.0346	70.795	70.9758	69.085	71.2503	70.5356	71.0324	69.6222	70.999	71.3862	70.4232	70.9992	70.4908	70.2479
2588.47	3863.28	70.9756	70.477	72.326	71.1959	71.8865	71.044	68.7215	69.2743	70.5818	71.7338	71.2815	72.1344	72.8055	71.9036	69.7069	71.6114	71.1339	70.4194	69.3999	69.5524	68.2902	70.7419	71.3604	70.0754	69.1516	69.4235	70.3497	69.1485	70.1048	71.143	68.6965	70.1467	69.6019	71.2129	71.0941	70.865	71.028	69.1435	71.3099	70.5896	71.0864	69.6803	71.0514	71.447	70.4865	71.0687	70.5534	70.3136
2590.4	3860.41	71.0347	70.5348	72.3883	71.2595	71.9429	71.1004	68.7793	69.3265	70.6355	71.7815	71.3345	72.1766	72.864	71.9575	69.7578	71.6654	71.1714	70.4698	69.4582	69.6074	68.3337	70.7979	71.4097	70.1447	69.2156	69.4963	70.4122	69.1892	70.1646	71.2028	68.7486	70.206	69.6579	71.2743	71.1582	70.9086	71.0901	69.204	71.373	70.628	71.14	69.746	71.1025	71.5048	70.5393	71.1423	70.6098	70.3782
2592.33	3857.54	71.0856	70.588	72.4432	71.3176	72.0021	71.1505	68.8382	69.3648	70.6934	71.8311	71.3914	72.2282	72.9173	72.0081	69.8097	71.7175	71.2108	70.52	69.5146	69.6535	68.3933	70.8637	71.458	70.1975	69.2781	69.5625	70.4731	69.245	70.2234	71.258	68.8054	70.2633	69.72	71.3281	71.2122	70.9649	71.1507	69.2693	71.4251	70.6792	71.1952	69.801	71.1558	71.5587	70.5914	71.1834	70.6661	70.4395
2594.26	3854.67	71.1381	70.6414	72.4967	71.3732	72.0583	71.2077	68.9044	69.4114	70.7455	71.8911	71.4531	72.2926	72.9689	72.0572	69.8639	71.768	71.2635	70.5751	69.5735	69.7036	68.4555	70.9252	71.5114	70.2526	69.3192	69.6235	70.5288	69.3054	70.2754	71.3114	68.8593	70.3218	69.7768	71.3836	71.2705	71.0339	71.2059	69.329	71.47	70.741	71.2408	69.8515	71.2185	71.6146	70.6406	71.2228	70.7193	70.4978
2596.19	3851.8	71.1828	70.6875	72.5479	71.4267	72.1038	71.2544	68.9617	69.472	70.779	71.9375	71.5078	72.3381	73.0147	72.0994	69.9145	71.8105	71.3157	70.6225	69.6269	69.7496	68.5081	70.9724	71.5612	70.3004	69.3514	69.6815	70.5798	69.3559	70.3221	71.3628	68.9044	70.3747	69.828	71.4311	71.3343	71.0933	71.2561	69.3809	71.5144	70.8017	71.2936	69.9016	71.2772	71.6683	70.6766	71.2749	70.774	70.5524
2598.12	3848.94	71.2296	70.7317	72.5931	71.4715	72.146	71.2957	69.0028	69.5219	70.8123	71.9811	71.5496	72.3761	73.0558	72.1347	69.9574	71.849	71.3566	70.6642	69.6673	69.792	68.5478	71.0166	71.6073	70.342	69.4049	69.7346	70.6292	69.4052	70.3703	71.4116	68.9494	70.4266	69.882	71.4767	71.3832	71.138	71.2967	69.4235	71.5608	70.8439	71.3397	69.9464	71.3306	71.7125	70.7181	71.3338	70.8214	70.5953
2600.04	3846.09	71.2706	70.7723	72.6262	71.5125	72.1863	71.3341	69.0423	69.5646	70.8591	72.0265	71.5832	72.4093	73.0915	72.1707	69.991	71.8797	71.3946	70.6993	69.7035	69.832	68.5668	71.0456	71.6421	70.38	69.455	69.7788	70.6721	69.4544	70.4094	71.4523	68.9901	70.47	69.924	71.5175	71.4211	71.1885	71.331	69.4613	71.6025	70.876	71.3706	69.9907	71.3724	71.7478	70.7657	71.3782	70.8637	70.6435
2601.97	3843.24	71.3073	70.8113	72.6579	71.5525	72.2228	71.379	69.0909	69.5988	70.9072	72.0567	71.6206	72.4418	73.1197	72.2056	70.0199	71.9089	71.4211	70.7315	69.7388	69.8727	68.5761	71.0797	71.6693	70.4057	69.5005	69.819	70.7084	69.4922	70.4413	71.4901	69.025	70.5084	69.9553	71.5565	71.461	71.2345	71.3641	69.4907	71.6279	70.8945	71.3965	70.0258	71.4054	71.7843	70.8057	71.4002	70.9006	70.6924
2603.9	3840.39	71.336	70.8401	72.6859	71.5853	72.2518	71.4107	69.1263	69.6214	70.9414	72.0695	71.6579	72.4692	73.1448	72.2263	70.0435	71.9328	71.4336	70.7599	69.7652	69.905	68.5824	71.1078	71.6898	70.43	69.5182	69.8536	70.7377	69.5218	70.4722	71.5214	69.0561	70.5419	69.9853	71.5879	71.4909	71.2711	71.3867	69.5189	71.6495	70.9197	71.4227	70.0568	71.4343	71.8163	70.844	71.4207	70.9311	70.7248
2605.83	3837.55	71.363	70.8649	72.7161	71.614	72.2756	71.4364	69.1534	69.6485	70.9705	72.0893	71.6864	72.4953	73.1755	72.241	70.0651	71.9548	71.4476	70.7795	69.7861	69.9316	68.601	71.1208	71.7187	70.4599	69.5237	69.8856	70.7646	69.5493	70.5047	71.5532	69.0791	70.5725	70.0125	71.6141	71.5219	71.3006	71.4031	69.5419	71.6742	70.952	71.449	70.0799	71.454	71.8466	70.8757	71.4595	70.9579	70.7395
2607.76	3834.71	71.3829	70.8847	72.7431	71.6407	72.298	71.4628	69.1735	69.6696	70.992	72.1188	71.7115	72.5188	73.2048	72.2608	70.0838	71.9773	71.4584	70.7994	69.805	69.9484	68.6314	71.1363	71.7452	70.4844	69.5458	69.9142	70.7917	69.5696	70.5301	71.5804	69.0977	70.6009	70.0322	71.6334	71.5525	71.3361	71.4268	69.5699	71.6994	70.9812	71.4715	70.1034	71.4751	71.876	70.8915	71.494	70.9839	70.7682
2609.69	3831.88	71.4019	70.9052	72.7702	71.6643	72.3184	71.4898	69.1951	69.696	71.0011	72.1432	71.7366	72.5346	73.2196	72.2858	70.1012	71.9964	71.478	70.8221	69.8275	69.9613	68.6607	71.1526	71.7678	70.4941	69.5878	69.9416	70.8171	69.5805	70.5533	71.6038	69.1175	70.6256	70.0554	71.6605	71.5783	71.3687	71.4512	69.5979	71.7206	70.9985	71.4841	70.1203	71.4984	71.9009	70.9021	71.5086	71.0068	70.803
2611.62	3829.05	71.4151	70.9199	72.7848	71.6857	72.3308	71.5057	69.2115	69.7207	71.0061	72.161	71.7586	72.5507	73.2304	72.305	70.1201	72.0109	71.5007	70.8397	69.8457	69.9746	68.6906	71.1679	71.7827	70.5118	69.621	69.9635	70.836	69.6041	70.576	71.6283	69.135	70.6502	70.0772	71.6902	71.5941	71.3889	71.471	69.6218	71.7254	71.0176	71.4978	70.1422	71.5134	71.9197	70.912	71.5217	71.0307	70.8354
2613.55	3826.22	71.429	70.9352	72.7979	71.7074	72.3463	71.5127	69.2249	69.7429	71.0239	72.1593	71.7813	72.5705	73.2471	72.3193	70.1399	72.0212	71.5126	70.8522	69.8565	69.993	68.7094	71.1786	71.7976	70.5316	69.6269	69.9815	70.852	69.6312	70.5915	71.6478	69.1519	70.6701	70.0932	71.7119	71.6082	71.4082	71.4924	69.6403	71.7425	71.0292	71.513	70.1602	71.5277	71.9383	70.9326	71.5405	71.0502	70.855
2615.47	3823.4	71.4364	70.9458	72.8051	71.7202	72.3588	71.5266	69.2249	69.7694	71.0374	72.1595	71.7944	72.5792	73.253	72.3257	70.1534	72.0278	71.5149	70.86	69.867	70.005	68.717	71.1858	71.806	70.5435	69.6242	69.9908	70.8661	69.648	70.6015	71.6632	69.1662	70.6845	70.1055	71.7273	71.6173	71.4301	71.5112	69.6543	71.7728	71.049	71.5211	70.1636	71.5492	71.9538	70.948	71.5535	71.069	70.8658
2617.4	3820.58	71.4454	70.9594	72.814	71.728	72.3627	71.5433	69.2365	69.7791	71.0555	72.176	71.801	72.5875	73.2557	72.3309	70.1613	72.0365	71.5167	70.8681	69.8687	70.0156	68.7115	71.2134	71.8143	70.553	69.6345	70.001	70.8794	69.6509	70.6123	71.6772	69.1736	70.6964	70.1131	71.7401	71.6244	71.4421	71.5224	69.6605	71.7796	71.0569	71.5243	70.1665	71.5648	71.961	70.967	71.555	71.0825	70.8709
2619.33	3817.77	71.4452	70.9626	72.8144	71.7341	72.3617	71.5467	69.241	69.769	71.0689	72.1839	71.8047	72.5893	73.255	72.33	70.1598	72.0348	71.5136	70.867	69.867	70.0115	68.6933	71.229	71.815	70.5487	69.6485	70.006	70.8828	69.6541	70.6162	71.682	69.1706	70.6994	70.1156	71.7459	71.6328	71.4493	71.5219	69.6637	71.7733	71.059	71.5295	70.1887	71.5525	71.9627	70.965	71.5608	71.0913	70.8872
2621.26	3814.96	71.4365	70.9537	72.8067	71.7276	72.3559	71.5331	69.2275	69.7522	71.067	72.1658	71.807	72.5844	73.2474	72.3259	70.1508	72.0262	71.5048	70.8589	69.8578	70.0047	68.6807	71.213	71.8094	70.543	69.6565	70.0013	70.8817	69.6541	70.607	71.6777	69.1629	70.6989	70.1084	71.7438	71.6341	71.4534	71.5098	69.6567	71.7536	71.0506	71.517	70.1895	71.537	71.9607	70.9431	71.5594	71.0893	70.8977
2623.19	3812.15	71.4206	70.9345	72.7865	71.7159	72.3418	71.5232	69.2165	69.7276	71.0442	72.1423	71.7958	72.5715	73.2275	72.3085	70.1329	72.0117	71.4897	70.8458	69.8314	69.9952	68.6645	71.1775	71.7925	70.5246	69.638	69.9871	70.8711	69.6409	70.5924	71.6698	69.1484	70.6942	70.0885	71.7401	71.6198	71.4498	71.4964	69.6413	71.7238	71.0333	71.4958	70.1677	71.524	71.9534	70.9207	71.5297	71.0844	70.888
2625.12	3809.35	71.4067	70.9196	72.7747	71.7064	72.325	71.5113	69.2058	69.6996	71.0248	72.1275	71.7823	72.5613	73.2092	72.2925	70.1148	71.9927	71.4722	70.832	69.8126	69.9811	68.6486	71.1554	71.7764	70.4978	69.6119	69.9698	70.8562	69.6172	70.5806	71.6602	69.1337	70.682	70.0716	71.7391	71.6034	71.4392	71.4836	69.6293	71.7092	71.0251	71.4865	70.1505	71.511	71.9439	70.916	71.5089	71.0757	70.8733
2627.05	3806.55	71.3902	70.904	72.7649	71.6997	72.3119	71.5069	69.194	69.6811	71.0232	72.1291	71.7732	72.5574	73.1971	72.2851	70.1044	71.9761	71.4673	70.819	69.7989	69.966	68.6343	71.1388	71.7648	70.4744	69.6139	69.9587	70.8446	69.6116	70.574	71.6575	69.1209	70.6695	70.0562	71.739	71.5968	71.4338	71.4734	69.6279	71.7029	71.0269	71.4811	70.1389	71.5064	71.9342	70.9046	71.511	71.0721	70.868
2628.98	3803.76	71.3773	70.8915	72.757	71.6899	72.2988	71.4849	69.1852	69.69	71.0246	72.1332	71.7647	72.5438	73.187	72.2739	70.0959	71.9613	71.4555	70.8055	69.7802	69.9419	68.6212	71.1247	71.7552	70.4649	69.6079	69.9486	70.8332	69.6204	70.5674	71.6552	69.1092	70.6609	70.0361	71.7274	71.5884	71.4347	71.4625	69.6244	71.6955	71.018	71.4722	70.1201	71.4941	71.9243	70.8806	71.505	71.0603	70.8628
2630.91	3800.97	71.356	70.8723	72.7374	71.6736	72.2767	71.4624	69.1565	69.6754	71.0088	72.1084	71.7491	72.5215	73.1711	72.2519	70.0782	71.9393	71.4355	70.7858	69.7547	69.9143	68.5929	71.1068	71.7318	70.4445	69.5849	69.9262	70.8153	69.6185	70.5515	71.642	69.0962	70.6477	70.0133	71.7146	71.571	71.4308	71.452	69.6168	71.6828	70.9942	71.4553	70.1007	71.4771	71.9122	70.8646	71.4804	71.0451	70.8502
2632.83	3798.19	71.3267	70.8452	72.7074	71.6501	72.2474	71.4414	69.1279	69.6379	70.99	72.0742	71.7291	72.503	73.1463	72.231	70.0509	71.9092	71.4032	70.7608	69.72	69.886	68.55	71.0723	71.702	70.4269	69.553	69.8964	70.7923	69.58	70.5222	71.6161	69.0693	70.6233	69.9848	71.693	71.5446	71.4023	71.4351	69.5951	71.6609	70.9767	71.4224	70.0685	71.4556	71.8937	70.8285	71.4522	71.025	70.8252
2634.76	3795.41	71.2915	70.8136	72.673	71.6281	72.2175	71.4202	69.1041	69.6095	70.9737	72.0612	71.7037	72.4753	73.1128	72.2038	70.0252	71.877	71.3624	70.7327	69.6837	69.8542	68.5163	71.0425	71.6741	70.4035	69.5224	69.8641	70.7628	69.547	70.486	71.5871	69.0375	70.5948	69.9562	71.6688	71.5078	71.3754	71.408	69.5696	71.6307	70.9569	71.3894	70.0332	71.4282	71.8648	70.7892	71.4291	71.0059	70.8018
2636.69	3792.63	71.2544	70.7776	72.6364	71.5954	72.181	71.3829	69.0748	69.5719	70.9402	72.0334	71.6709	72.4413	73.0759	72.1701	69.9932	71.8395	71.3164	70.6983	69.641	69.8276	68.4837	71.0056	71.6399	70.3616	69.4962	69.8256	70.7191	69.5088	70.4477	71.5544	69.0091	70.5568	69.9229	71.6394	71.4699	71.3505	71.3687	69.5401	71.5889	70.9231	71.3621	70.006	71.3849	71.8298	70.7504	71.3889	70.9771	70.7714
2638.62	3789.86	71.2128	70.738	72.5968	71.5583	72.1393	71.3458	69.0372	69.5286	70.8981	71.9843	71.6357	72.4101	73.0389	72.1372	69.9529	71.8013	71.2772	70.6616	69.595	69.7934	68.4419	70.9686	71.5976	70.3155	69.4639	69.7875	70.6809	69.47	70.4128	71.5197	68.9745	70.5183	69.8868	71.6008	71.4325	71.3135	71.332	69.5127	71.5514	70.8814	71.3334	69.9825	71.3383	71.7905	70.7188	71.3408	70.9482	70.7349
2640.55	3787.09	71.1787	70.7058	72.563	71.5232	72.0995	71.3111	68.9955	69.4866	70.8696	71.9515	71.6006	72.3737	72.9989	72.103	69.9149	71.7688	71.2525	70.6291	69.5516	69.7516	68.4055	70.9302	71.5578	70.283	69.4277	69.7506	70.6495	69.4232	70.3783	71.4854	68.9342	70.484	69.8456	71.5733	71.3978	71.2717	71.2985	69.4791	71.5222	70.8425	71.2972	69.947	71.2912	71.7526	70.6911	71.3032	70.9159	70.6978
2642.48	3784.33	71.1391	70.6646	72.5197	71.4792	72.0567	71.2708	68.9409	69.4429	70.8397	71.9239	71.5574	72.3371	72.9556	72.0657	69.875	71.7279	71.2261	70.59	69.4987	69.7005	68.3703	70.8758	71.5114	70.2455	69.3889	69.7033	70.6047	69.3778	70.3371	71.4454	68.8914	70.4435	69.7953	71.5355	71.3568	71.2426	71.2614	69.4426	71.4829	70.8074	71.2545	69.8969	71.2451	71.7138	70.6584	71.2652	70.8743	70.6584
2644.41	3781.57	71.0961	70.6201	72.4742	71.4292	72.0089	71.2259	68.8819	69.4011	70.7966	71.8791	71.511	72.3064	72.9159	72.0215	69.8292	71.6821	71.1946	70.5442	69.4453	69.6466	68.3275	70.8194	71.4589	70.2002	69.3416	69.6536	70.5531	69.3425	70.2908	71.4005	68.8417	70.3955	69.746	71.4971	71.3002	71.2026	71.2175	69.3982	71.431	70.7746	71.2115	69.8418	71.2002	71.6673	70.6167	71.2249	70.8278	70.6062
2646.34	3778.81	71.041	70.5678	72.4253	71.3781	71.9588	71.1769	68.8252	69.353	70.7448	71.8251	71.462	72.2605	72.8675	71.9723	69.7727	71.6286	71.1348	70.4904	69.3925	69.5935	68.2698	70.765	71.4009	70.1438	69.2992	69.6025	70.4974	69.2907	70.2375	71.3511	68.7907	70.3413	69.6942	71.4492	71.2346	71.149	71.1693	69.3472	71.3924	70.7309	71.1615	69.7916	71.1442	71.6172	70.5541	71.1729	70.7816	70.5574
2648.26	3776.06	70.9827	70.5156	72.3737	71.3252	71.9032	71.1231	68.7587	69.2956	70.6982	71.7725	71.4138	72.1956	72.8155	71.9214	69.7191	71.5759	71.0681	70.4375	69.3373	69.5377	68.2132	70.7157	71.3456	70.084	69.2427	69.5438	70.443	69.2371	70.1788	71.2967	68.7385	70.2842	69.6379	71.4101	71.1768	71.0963	71.1161	69.3002	71.3435	70.6688	71.1129	69.7301	71.0824	71.5595	70.4885	71.1095	70.732	70.5081
2650.19	3773.31	70.9183	70.4558	72.3138	71.2688	71.8449	71.0656	68.6824	69.2225	70.6413	71.7094	71.3587	72.1311	72.758	71.8667	69.6679	71.5183	70.9962	70.38	69.2768	69.4789	68.1513	70.654	71.284	70.0184	69.1774	69.4786	70.3814	69.1975	70.118	71.238	68.6826	70.2257	69.5803	71.3519	71.1173	71.0344	71.0563	69.2524	71.2849	70.5994	71.0599	69.6656	71.0289	71.4984	70.4258	71.0453	70.6805	70.4518
2652.12	3770.57	70.8538	70.3931	72.2506	71.2062	71.7795	71.0023	68.6095	69.1561	70.5768	71.6569	71.295	72.0868	72.697	71.8082	69.6126	71.456	70.9236	70.3169	69.2138	69.4194	68.0801	70.5852	71.2167	69.9481	69.118	69.4097	70.314	69.1386	70.0517	71.1747	68.6232	70.1648	69.5196	71.2804	71.0539	70.964	70.9896	69.1873	71.2216	70.5441	71.0014	69.6039	70.9711	71.4362	70.3745	70.987	70.6181	70.3874
2654.05	3767.83	70.7807	70.3223	72.1794	71.1374	71.7115	70.9385	68.5339	69.0774	70.5146	71.6006	71.2256	72.0297	72.6316	71.7439	69.5479	71.3899	70.8718	70.2504	69.1372	69.3403	68.0057	70.5148	71.1411	69.88	69.0521	69.3358	70.2443	69.068	69.9794	71.1056	68.5548	70.0911	69.4508	71.2118	70.9764	70.9048	70.9235	69.1193	71.1458	70.4865	70.9398	69.54	70.909	71.3673	70.3029	70.9276	70.5535	70.3216
2655.98	3765.09	70.7038	70.2482	72.1045	71.0595	71.6435	70.8671	68.4674	68.9953	70.4535	71.5186	71.1505	71.947	72.563	71.6714	69.4771	71.3229	70.8142	70.1779	69.0498	69.2693	67.9458	70.4362	71.0609	69.8016	68.9917	69.2569	70.168	68.9992	69.9049	71.0299	68.4778	70.0131	69.3684	71.1444	70.8943	70.8348	70.8507	69.049	71.075	70.4136	70.869	69.4678	70.8418	71.2914	70.2178	70.8481	70.4785	70.2428
2657.91	3762.36	70.6196	70.1665	72.023	70.9802	71.5638	70.7859	68.3871	68.9233	70.3754	71.427	71.0714	71.8586	72.4894	71.5924	69.3991	71.2481	70.7366	70.1002	68.9686	69.2006	67.8718	70.3405	70.9755	69.7181	68.9045	69.1762	70.0834	68.9255	69.8259	70.9488	68.3999	69.9293	69.283	71.0696	70.8107	70.7586	70.7726	68.9781	71.0058	70.33	70.7892	69.3931	70.7498	71.2088	70.1347	70.7502	70.4008	70.1628
2659.84	3759.63	70.5333	70.0803	71.9436	70.8957	71.4766	70.7096	68.2986	68.8316	70.291	71.3436	70.9901	71.7813	72.4065	71.5166	69.3166	71.1656	70.6645	70.0206	68.8884	69.1169	67.7859	70.253	70.8914	69.6396	68.8105	69.0887	69.9952	68.8256	69.74	70.8647	68.3196	69.8453	69.204	70.9878	70.7202	70.6728	70.6943	68.8983	70.9215	70.2344	70.7096	69.3098	70.6562	71.1258	70.0505	70.6595	70.3214	70.0803
2661.77	3756.9	70.4441	69.9928	71.8602	70.8103	71.3945	70.6267	68.21	68.73	70.2097	71.2778	70.9011	71.7109	72.3239	71.4343	69.2306	71.0814	70.5736	69.9362	68.8007	69.0164	67.6982	70.1668	70.8005	69.5526	68.729	68.9998	69.9066	68.7272	69.6536	70.7786	68.2347	69.7608	69.1217	70.9037	70.6305	70.5805	70.6196	68.8192	70.8392	70.1496	70.6277	69.2231	70.5639	71.0391	69.9492	70.5779	70.2409	70.0007
2663.69	3754.18	70.3574	69.9096	71.774	70.7208	71.3093	70.5449	68.1123	68.6354	70.1206	71.1997	70.8129	71.6322	72.2455	71.3501	69.1431	70.9953	70.4724	69.8493	68.7079	68.9154	67.6078	70.063	70.7045	69.461	68.6329	68.9104	69.8137	68.65	69.5642	70.6893	68.1463	69.6714	69.0312	70.8137	70.5386	70.485	70.5331	68.7379	70.7644	70.0775	70.5463	69.145	70.4626	70.9431	69.8542	70.5088	70.1555	69.9142
2665.62	3751.47	70.2623	69.8184	71.6799	70.6254	71.2186	70.4536	68.0076	68.5411	70.0231	71.0992	70.7206	71.5321	72.1526	71.2597	69.0526	70.9041	70.3749	69.7562	68.6173	68.8191	67.5039	69.9722	70.6065	69.3702	68.541	68.8132	69.7127	68.5715	69.4748	70.5974	68.0539	69.5757	68.9359	70.72	70.44	70.3955	70.4385	68.6471	70.6669	69.9908	70.4627	69.0503	70.3579	70.8458	69.7647	70.4221	70.0635	69.8186
2667.55	3748.75	70.1637	69.7206	71.582	70.525	71.1245	70.3632	67.8982	68.4447	69.937	70.9925	70.6303	71.4288	72.0595	71.1645	68.9603	70.8098	70.2694	69.6605	68.5269	68.7197	67.4036	69.8896	70.508	69.2726	68.4524	68.7151	69.6102	68.4674	69.3754	70.498	67.9563	69.4813	68.838	70.6246	70.3385	70.3002	70.3359	68.5522	70.5697	69.888	70.3634	68.9473	70.2566	70.7481	69.6675	70.3124	69.962	69.7115
2669.48	3746.05	70.0546	69.6114	71.4787	70.424	71.0235	70.2623	67.7842	68.3374	69.8553	70.8963	70.5313	71.3299	71.9649	71.066	68.8609	70.7088	70.1676	69.5585	68.4239	68.6192	67.3152	69.7847	70.3983	69.1696	68.344	68.6113	69.5044	68.3708	69.2661	70.3888	67.8521	69.3817	68.7368	70.5257	70.2308	70.1919	70.2356	68.4552	70.4693	69.7796	70.2594	68.8409	70.1532	70.6402	69.5708	70.1992	69.8597	69.6131
2671.41	3743.34	69.9368	69.4987	71.3646	70.3157	70.9127	70.1575	67.6627	68.2274	69.7549	70.8035	70.4185	71.2329	71.8546	70.9559	68.7513	70.6037	70.0599	69.4474	68.3104	68.5129	67.2143	69.6718	70.2814	69.0507	68.2242	68.4924	69.3865	68.2715	69.1515	70.273	67.7414	69.2669	68.6269	70.4133	70.1149	70.0727	70.1255	68.34	70.3624	69.6643	70.1524	68.7242	70.0431	70.5201	69.4488	70.0973	69.7486	69.5098
2673.34	3740.64	69.8144	69.3846	71.2383	70.1988	70.796	70.0439	67.5355	68.1029	69.6353	70.6877	70.3018	71.1192	71.7361	70.8462	68.6367	70.4945	69.9461	69.3318	68.1951	68.3891	67.0933	69.5451	70.1575	68.924	68.1019	68.3676	69.2622	68.1566	69.0347	70.1529	67.6279	69.1425	68.5126	70.2987	69.9979	69.9554	70.0008	68.2236	70.2518	69.5491	70.042	68.6039	69.92	70.3942	69.3261	69.9842	69.6355	69.3926
2675.27	3737.94	69.6878	69.2651	71.1149	70.0735	70.6718	69.9303	67.3963	67.9705	69.5151	70.5612	70.1828	70.985	71.6188	70.7295	68.5151	70.3763	69.8209	69.2101	68.0724	68.2621	66.9609	69.4117	70.0248	68.803	67.9767	68.2417	69.1356	68.0264	68.9103	70.0301	67.5074	69.014	68.3911	70.1642	69.8737	69.8382	69.8752	68.105	70.1262	69.4284	69.918	68.4897	69.7913	70.2676	69.203	69.8441	69.5144	69.2632
2677.2	3735.25	69.5508	69.1334	70.9853	69.9413	70.5443	69.8016	67.2427	67.8332	69.3855	70.4379	70.0497	70.8511	71.4928	70.597	68.3839	70.2499	69.6864	69.0754	67.9421	68.1298	66.8226	69.2765	69.8848	68.6745	67.853	68.1068	69.0012	67.8908	68.7767	69.8956	67.377	68.8879	68.2634	70.0335	69.7453	69.7	69.7482	67.9841	69.9942	69.2929	69.795	68.3668	69.6617	70.1391	69.0798	69.7062	69.3843	69.1312
2679.13	3732.56	69.4233	69.0069	70.8637	69.8129	70.4208	69.6893	67.1036	67.6921	69.2535	70.3232	69.9238	70.7367	71.3674	70.4698	68.2592	70.132	69.5654	68.9497	67.8206	67.999	66.6864	69.1446	69.7567	68.553	67.7264	67.9749	68.871	67.7683	68.6482	69.7636	67.2507	68.7661	68.1358	69.9066	69.621	69.5719	69.619	67.8592	69.8544	69.1616	69.6707	68.2383	69.5322	70.0134	68.9526	69.5879	69.2537	69
2681.05	3729.88	69.3044	68.8891	70.7473	69.6936	70.3087	69.5813	66.9798	67.5751	69.1376	70.2227	69.8126	70.6285	71.2574	70.3566	68.1461	70.0215	69.453	68.8336	67.7079	67.8773	66.5632	69.0263	69.6384	68.4312	67.5948	67.8535	68.7481	67.649	68.5209	69.6395	67.1326	68.648	68.0154	69.7956	69.4989	69.4532	69.4993	67.745	69.7361	69.0493	69.5561	68.1249	69.4036	69.8934	68.8353	69.4792	69.1312	68.8849
2682.98	3727.19	69.1874	68.7757	70.6326	69.5742	70.1951	69.4708	66.8601	67.4526	69.0366	70.1079	69.6997	70.5171	71.1514	70.2436	68.0318	69.9087	69.3314	68.7151	67.5949	67.7484	66.4508	68.915	69.5171	68.3043	67.4691	67.7306	68.6194	67.5345	68.3984	69.5168	67.0189	68.5298	67.8959	69.672	69.3784	69.333	69.3779	67.6283	69.6242	68.9308	69.4417	68.016	69.2833	69.7694	68.7225	69.3503	69.0091	68.7565
2684.91	3724.52	69.0512	68.644	70.4994	69.4395	70.0635	69.3416	66.7079	67.3055	68.9228	69.964	69.5742	70.3833	71.0235	70.1156	67.9007	69.783	69.1926	68.5822	67.4667	67.6047	66.3336	68.7766	69.3809	68.1715	67.3424	67.5905	68.48	67.41	68.2681	69.3861	66.8902	68.4009	67.764	69.5431	69.244	69.1985	69.2412	67.4969	69.4918	68.7962	69.3131	67.8777	69.1522	69.6311	68.5937	69.2073	68.8766	68.6202
2686.84	3721.84	68.9055	68.5037	70.3603	69.2983	69.9245	69.2044	66.5516	67.1665	68.7894	69.8298	69.4389	70.2384	70.8901	69.9839	67.7623	69.6527	69.046	68.4415	67.3339	67.4604	66.209	68.6331	69.2396	68.0296	67.1978	67.4404	68.3372	67.2646	68.1232	69.2458	66.7494	68.2647	67.6305	69.3929	69.1039	69.0582	69.0995	67.3613	69.3476	68.6448	69.1728	67.7267	69.009	69.4873	68.4543	69.0781	68.7328	68.4864
2688.77	3719.17	68.7526	68.3563	70.2151	69.1515	69.7786	69.0609	66.4136	67.0166	68.6413	69.6929	69.2993	70.0982	70.7488	69.8417	67.6224	69.5158	68.9036	68.2915	67.1938	67.3135	66.0671	68.4954	69.09	67.8789	67.04	67.2896	68.1855	67.1011	67.9691	69.0985	66.6056	68.1217	67.4877	69.2503	68.9593	68.9111	68.9534	67.2191	69.2092	68.4832	69.033	67.5898	68.8499	69.3397	68.2996	68.9463	68.5886	68.3465
2690.7	3716.51	68.5978	68.2082	70.0689	68.9982	69.6289	68.9232	66.2565	66.8595	68.491	69.5504	69.1525	69.9579	70.6013	69.6951	67.4774	69.3735	68.7463	68.1428	67.0451	67.1695	65.9148	68.3531	68.9359	67.7287	66.8764	67.1317	68.031	66.9436	67.8165	68.9497	66.455	67.9684	67.3365	69.1017	68.8031	68.7573	68.8011	67.0693	69.0533	68.3403	68.8735	67.4369	68.6805	69.186	68.1358	68.7779	68.4354	68.1861
2692.63	3713.85	68.4341	68.0499	69.9096	68.8396	69.4729	68.7789	66.0838	66.6946	68.3353	69.3862	68.9983	69.8014	70.4553	69.5414	67.3276	69.2234	68.5772	67.9863	66.8948	67.0132	65.7589	68.2035	68.7763	67.5705	66.7004	66.9696	67.872	66.7916	67.6601	68.7924	66.2954	67.8134	67.1792	68.9443	68.6411	68.5995	68.6445	66.9102	68.8883	68.1988	68.7092	67.2695	68.5113	69.0246	67.9749	68.5973	68.2817	68.0325
2694.56	3711.19	68.2692	67.8903	69.7427	68.6738	69.3094	68.6249	65.9027	66.5282	68.1746	69.2281	68.8379	69.6266	70.3004	69.3825	67.1702	69.0656	68.4132	67.8193	66.7377	66.8427	65.5922	68.0342	68.6111	67.3991	66.5422	66.8036	67.7032	66.63	67.4955	68.6272	66.1302	67.6506	67.0158	68.7772	68.47	68.4305	68.4812	66.743	68.7218	68.0251	68.5482	67.103	68.3521	68.8587	67.8186	68.4435	68.1138	67.8758
2696.48	3708.53	68.0956	67.723	69.5729	68.5038	69.1411	68.4599	65.7121	66.3546	68.0176	69.0762	68.673	69.4597	70.1311	69.2151	67.0002	68.8998	68.2307	67.6448	66.5716	66.6651	65.4184	67.8485	68.438	67.2228	66.3819	66.6261	67.5254	66.46	67.3163	68.451	65.9627	67.4798	66.849	68.6037	68.2945	68.2628	68.3117	66.5829	68.5525	67.8381	68.3801	66.9437	68.1783	68.6872	67.6354	68.292	67.9392	67.7075
2698.41	3705.88	67.9211	67.5495	69.4056	68.3281	68.9699	68.2912	65.5246	66.1735	67.8624	68.9085	68.5092	69.2997	69.9635	69.0445	66.828	68.7303	68.06	67.4694	66.4072	66.4799	65.2454	67.6704	68.2686	67.055	66.2021	66.441	67.3507	66.2852	67.1389	68.275	65.7933	67.3087	66.6784	68.4219	68.1236	68.0838	68.1346	66.4198	68.3868	67.6528	68.1985	66.7697	67.989	68.5084	67.4515	68.1087	67.7642	67.5351
2700.34	3703.23	67.7456	67.3773	69.2319	68.1544	68.7996	68.1314	65.3275	66.0006	67.7004	68.7338	68.3419	69.1298	69.8011	68.8784	66.6573	68.5628	67.8932	67.2924	66.2412	66.305	65.0778	67.4846	68.0987	66.8701	66.0055	66.2603	67.1758	66.1191	66.9627	68.1041	65.6238	67.1424	66.5049	68.247	67.9537	67.9123	67.9519	66.2542	68.2104	67.4887	68.0273	66.5919	67.8084	68.3349	67.2767	67.9116	67.5923	67.3657
2702.27	3700.59	67.5637	67.2033	69.0542	67.9765	68.6222	67.9661	65.1353	65.821	67.5347	68.5581	68.168	68.9533	69.627	68.7117	66.4834	68.3937	67.7185	67.1065	66.0741	66.1317	64.906	67.3123	67.9244	66.679	65.8141	66.0752	66.9875	65.9496	66.7803	67.9258	65.4452	66.9667	66.3266	68.0737	67.7748	67.7382	67.7676	66.0759	68.0238	67.3321	67.8504	66.4189	67.6255	68.1585	67.0953	67.7307	67.411	67.1847
2704.2	3697.95	67.375	67.0219	68.8685	67.7913	68.4393	67.7821	64.9301	65.6365	67.3609	68.3783	67.9889	68.7684	69.4423	68.534	66.3064	68.2192	67.5379	66.9176	65.9009	65.9404	64.7216	67.139	67.741	66.4938	65.6247	65.8823	66.796	65.7633	66.593	67.7414	65.2637	66.7805	66.1444	67.8892	67.5877	67.55	67.5881	65.8945	67.8379	67.1499	67.6684	66.2347	67.4387	67.973	66.9093	67.5647	67.2277	67.0034
2706.13	3695.32	67.1805	66.8323	68.6812	67.6	68.2507	67.5963	64.7242	65.439	67.172	68.1988	67.8061	68.5858	69.258	68.3466	66.1233	68.0403	67.3468	66.7265	65.7133	65.7423	64.5443	66.9472	67.5495	66.3043	65.4338	65.6843	66.5966	65.5662	66.3996	67.5531	65.0776	66.5909	65.9531	67.6977	67.3966	67.3512	67.402	65.714	67.6571	66.9477	67.48	66.0377	67.2496	67.7776	66.7097	67.3841	67.04	66.8161
2708.06	3692.68	66.9746	66.6295	68.4793	67.4034	68.0533	67.4099	64.5173	65.2269	66.9832	68.0009	67.6127	68.4037	69.063	68.1565	65.931	67.8491	67.1382	66.523	65.5225	65.5362	64.3562	66.7485	67.3485	66.1106	65.2339	65.4836	66.3953	65.3688	66.1976	67.357	64.8785	66.3955	65.7541	67.4929	67.2013	67.1651	67.2058	65.5224	67.4705	66.7401	67.2834	65.8309	67.0505	67.5767	66.5143	67.179	66.8465	66.6258
2709.99	3690.06	66.7716	66.4305	68.2783	67.2032	67.8473	67.2299	64.3095	65.0177	66.8061	67.8024	67.4207	68.2131	68.8664	67.9609	65.7354	67.6537	66.9311	66.3177	65.3329	65.3293	64.149	66.5434	67.1477	65.9117	65.0261	65.2762	66.1914	65.1614	65.9941	67.1588	64.6775	66.1988	65.5553	67.2925	66.9975	66.9731	67.0046	65.3192	67.2614	66.5575	67.0867	65.6385	66.8366	67.3771	66.3246	66.9616	66.6444	66.4268
2711.92	3687.43	66.5658	66.2315	68.0768	67.002	67.6496	67.0349	64.1017	64.8091	66.6243	67.6187	67.2283	68.0086	68.6768	67.7706	65.5433	67.4586	66.7265	66.1127	65.1411	65.1281	63.9397	66.3383	66.9498	65.7087	64.8161	65.0649	65.9857	64.9527	65.787	66.9605	64.4761	66.0022	65.3581	67.084	66.7948	66.7671	66.8097	65.1208	67.0494	66.37	66.8932	65.4318	66.6298	67.1796	66.1341	66.7475	66.4443	66.2152
2713.84	3684.81	66.3541	66.0256	67.865	66.7909	67.4448	66.8163	63.8738	64.5891	66.423	67.427	67.023	67.7994	68.4757	67.5697	65.3398	67.2562	66.5144	65.8953	64.9404	64.9207	63.7401	66.1255	66.7417	65.4965	64.5993	64.8411	65.7678	64.74	65.5671	66.7475	64.2664	65.7923	65.1501	66.8804	66.5839	66.5529	66.6023	64.9164	66.8337	66.1585	66.6822	65.2114	66.4072	66.9706	65.9214	66.5445	66.2323	65.9988
2715.77	3682.19	66.1329	65.8099	67.646	66.5739	67.2277	66.6113	63.6448	64.3549	66.2129	67.2177	66.8115	67.5954	68.264	67.3583	65.1263	67.0415	66.308	65.676	64.7306	64.7006	63.5377	65.911	66.5247	65.2755	64.383	64.6113	65.5459	64.5207	65.3465	66.5311	64.0525	65.5777	64.9361	66.6654	66.3651	66.3414	66.3792	64.7065	66.6105	65.9423	66.46	65.0014	66.1776	66.7513	65.7036	66.337	66.017	65.7853
2717.7	3679.58	65.9074	65.5933	67.4263	66.3493	67.0077	66.401	63.4056	64.1251	66.0103	66.9946	66.598	67.3886	68.0519	67.1435	64.9094	66.8214	66.0955	65.4522	64.5194	64.4727	63.3218	65.6967	66.3078	65.0527	64.1626	64.3794	65.3196	64.2952	65.1235	66.3165	63.8316	65.3614	64.7124	66.4515	66.137	66.1188	66.1551	64.4916	66.3941	65.717	66.2392	64.787	65.946	66.5265	65.4711	66.1051	65.7955	65.5688
2719.63	3676.97	65.6672	65.3634	67.1881	66.1139	66.7782	66.1833	63.1482	63.8942	65.789	66.7579	66.3727	67.1533	67.8264	66.9202	64.6813	66.5967	65.8682	65.213	64.2869	64.2256	63.0841	65.4647	66.0774	64.8135	63.9257	64.1399	65.0793	64.0748	64.8846	66.0854	63.6025	65.1313	64.4763	66.2146	65.9018	65.8822	65.9273	64.2676	66.1656	65.4808	66.0053	64.5502	65.6958	66.2924	65.2324	65.8589	65.5657	65.3443
2721.56	3674.36	65.4195	65.1201	66.9424	65.8708	66.5356	65.945	62.8896	63.6514	65.5502	66.5271	66.1385	66.9139	67.5896	66.6851	64.4459	66.3647	65.6213	64.9675	64.0523	63.9802	62.8496	65.2153	65.8344	64.5682	63.6769	63.8886	64.8273	63.8539	64.6392	65.8432	63.3661	64.8914	64.2322	65.9761	65.6574	65.6404	65.6824	64.0325	65.926	65.2449	65.7593	64.3088	65.4407	66.0491	64.9898	65.6151	65.3271	65.1001
2723.49	3671.76	65.1731	64.8781	66.6991	65.63	66.293	65.7149	62.6292	63.4119	65.3216	66.3085	65.9026	66.6853	67.3595	66.4523	64.2138	66.1319	65.3795	64.7261	63.8151	63.7401	62.6113	64.9624	65.5932	64.3277	63.4274	63.6391	64.5747	63.6101	64.3919	65.6041	63.1309	64.6502	63.9911	65.7326	65.4118	65.4119	65.4413	63.7972	65.6903	65.0167	65.5134	64.0636	65.2051	65.8048	64.7547	65.3856	65.0909	64.8573
2725.42	3669.16	64.9295	64.6408	66.4616	65.3878	66.0504	65.4728	62.3704	63.1602	65.0938	66.0745	65.6704	66.4524	67.1269	66.2218	63.9792	65.8999	65.1363	64.4828	63.5765	63.4916	62.3597	64.7175	65.3564	64.0774	63.1846	63.3894	64.3252	63.3506	64.1434	65.3641	62.8901	64.4099	63.7516	65.4959	65.1694	65.1719	65.202	63.5611	65.4464	64.7806	65.2755	63.8189	64.9593	65.56	64.5174	65.1575	64.8479	64.6185
2727.35	3666.57	64.6925	64.4123	66.2368	65.1614	65.8196	65.2471	62.119	62.9214	64.8765	65.8323	65.451	66.2298	66.9029	66.0028	63.7604	65.6772	64.9118	64.2466	63.3549	63.2509	62.1357	64.4885	65.1294	63.8413	62.9559	63.1502	64.0886	63.1162	63.9136	65.1383	62.6614	64.1825	63.5221	65.2691	64.9359	64.9331	64.9754	63.3391	65.2158	64.5491	65.0415	63.5912	64.7226	65.332	64.2794	64.9287	64.6169	64.3996
2729.27	3663.98	64.4548	64.1815	66.0016	64.9243	65.5822	65.0221	61.8675	62.6864	64.6461	65.5973	65.2221	65.9991	66.678	65.7779	63.5331	65.4447	64.6839	64.0058	63.1239	63.0073	61.9215	64.2524	64.8954	63.6067	62.7172	62.9076	63.8484	62.8863	63.6744	64.9091	62.4298	63.9489	63.2848	65.0342	64.693	64.6922	64.7354	63.1036	64.9745	64.3095	64.8079	63.3446	64.48	65.0959	64.0382	64.6705	64.3785	64.1633
2731.2	3661.39	64.1991	63.9336	65.7481	64.672	65.3295	64.7901	61.5918	62.4292	64.4021	65.3677	64.9729	65.7514	66.4347	65.5346	63.285	65.1924	64.4342	63.7479	62.8768	62.7501	61.6751	64.002	64.6425	63.3535	62.4561	62.6487	63.5883	62.618	63.4196	64.6575	62.1755	63.6996	63.0278	64.7785	64.435	64.4369	64.4839	62.8523	64.7174	64.0505	64.5634	63.0923	64.2256	64.8394	63.7792	64.4	64.1262	63.9033
2733.13	3658.81	63.9318	63.6735	65.4856	64.4109	65.069	64.5238	61.3105	62.1652	64.1537	65.1154	64.7134	65.4997	66.1781	65.2827	63.0293	64.9308	64.1776	63.4828	62.6193	62.4885	61.4176	63.7329	64.3757	63.0666	62.1782	62.3749	63.3163	62.3515	63.1508	64.3896	61.9066	63.4384	62.7638	64.5187	64.1713	64.1696	64.231	62.5927	64.4561	63.7905	64.3014	62.8333	63.9592	64.5713	63.5112	64.1369	63.8652	63.6347
2735.06	3656.23	63.6521	63.4008	65.2086	64.136	64.801	64.2509	61.022	61.8851	63.8895	64.8314	64.4462	65.2355	65.9124	65.0207	62.7653	64.6635	63.9078	63.2052	62.3523	62.2167	61.1633	63.4469	64.1018	62.7841	61.8916	62.0918	63.0331	62.095	62.8735	64.1175	61.6319	63.1631	62.4904	64.2529	63.8962	63.9045	63.9612	62.3317	64.1874	63.5287	64.032	62.5638	63.6739	64.2972	63.2244	63.8639	63.5994	63.3659
2736.99	3653.65	63.3732	63.1277	64.9295	63.857	64.527	63.9916	60.7241	61.6079	63.626	64.5517	64.179	64.9656	65.6499	64.758	62.4986	64.3966	63.6338	62.926	62.0896	61.9457	60.8956	63.1728	63.8307	62.5121	61.6256	61.806	62.7474	61.8236	62.5895	63.8443	61.3612	62.8904	62.2116	63.989	63.6121	63.6414	63.68	62.0669	63.9201	63.2634	63.7596	62.2781	63.3759	64.0194	62.9399	63.5852	63.3299	63.0944
2738.92	3651.08	63.1021	62.8598	64.6617	63.5877	64.2618	63.7428	60.435	61.324	63.3766	64.2943	63.9187	64.7023	65.3941	64.5019	62.2387	64.136	63.377	62.6584	61.8298	61.6721	60.6236	62.9228	63.5659	62.2471	61.3578	61.5253	62.4699	61.5337	62.3131	63.5769	61.0982	62.6243	61.9428	63.7236	63.3354	63.3677	63.4129	61.8072	63.6615	63.0027	63.4967	62.0127	63.0917	63.7508	62.6725	63.3171	63.0632	62.8219
2740.85	3648.51	62.8213	62.5847	64.3885	63.3127	63.9854	63.4582	60.1406	61.0294	63.121	64.0269	63.6465	64.4398	65.1327	64.235	61.9729	63.8675	63.1155	62.379	61.561	61.3764	60.3474	62.6583	63.2914	61.9742	61.0786	61.2387	62.1819	61.2482	62.0314	63.3013	60.822	62.3494	61.6699	63.4492	63.0475	63.0802	63.1349	61.5334	63.3806	62.7235	63.2371	61.7319	62.8027	63.4737	62.4032	63.0424	62.7845	62.5317
2742.78	3645.94	62.5233	62.2957	64.098	63.0249	63.6927	63.1665	59.8373	60.7399	62.8463	63.7351	63.3602	64.164	64.8584	63.9569	61.692	63.5796	62.8372	62.0852	61.2766	61.0737	60.0614	62.3544	62.9984	61.6752	60.7633	60.941	61.88	60.9642	61.7356	63.0161	60.5353	62.0569	61.3804	63.1502	62.7502	62.7907	62.8474	61.2506	63.0903	62.4425	62.95	61.4315	62.5063	63.1799	62.1149	62.7369	62.4976	62.2383
2744.71	3643.38	62.2133	61.993	63.7933	62.7224	63.3901	62.8809	59.5198	60.4305	62.5603	63.4291	63.064	63.8628	64.568	63.6679	61.3946	63.2801	62.544	61.7808	60.9799	60.7707	59.7589	62.0392	62.6937	61.3732	60.453	60.629	61.5706	60.667	61.4244	62.7168	60.2353	61.75	61.0723	62.8507	62.4471	62.5008	62.5458	60.9595	62.7875	62.1397	62.6473	61.134	62.1923	62.8744	61.805	62.424	62.2002	61.9428
2746.63	3640.82	61.8968	61.6864	63.4822	62.4145	63.0852	62.5906	59.1966	60.1125	62.2656	63.1236	62.7599	63.5581	64.2689	63.3705	61.0949	62.974	62.2309	61.4715	60.6814	60.4597	59.4531	61.7283	62.3839	61.0664	60.1499	60.3123	61.2533	60.3633	61.1096	62.4096	59.926	61.4401	60.7608	62.5418	62.1331	62.1893	62.238	60.6621	62.4809	61.8382	62.3516	60.8349	61.8715	62.5615	61.482	62.1237	61.8965	61.643
2748.56	3638.27	61.5913	61.3897	63.1778	62.1095	62.7833	62.2855	58.8725	59.8002	61.9713	62.8256	62.4641	63.2686	63.9787	63.0756	60.8021	62.6785	61.9247	61.1679	60.386	60.1542	59.1643	61.4221	62.0823	60.7612	59.8402	59.9984	60.9363	60.0584	60.7983	62.1029	59.6235	61.1389	60.4578	62.2463	61.8218	61.8773	61.9318	60.364	62.1816	61.542	62.0466	60.5278	61.5604	62.2525	61.1791	61.8275	61.5896	61.3364
2750.49	3635.71	61.2885	61.0948	62.8794	61.8121	62.487	61.9915	58.5563	59.4998	61.6924	62.5431	62.1811	62.9812	63.6949	62.7915	60.5125	62.3924	61.6317	60.8687	60.0957	59.8595	58.8818	61.1226	61.7857	60.4548	59.538	59.6918	60.6279	59.7562	60.4941	61.8053	59.3287	60.8427	60.1653	61.9526	61.518	61.5805	61.6338	60.0765	61.886	61.2495	61.7467	60.215	61.2638	61.9517	60.9086	61.5211	61.2918	61.0354
2752.42	3633.17	60.9819	60.7937	62.579	61.5073	62.1834	61.7034	58.2395	59.2017	61.412	62.2455	61.8867	62.6915	63.4071	62.5028	60.2123	62.0959	61.3397	60.5612	59.7923	59.56	58.5711	60.8118	61.4817	60.1527	59.2221	59.377	60.3144	59.4527	60.1842	61.5018	59.0265	60.5363	59.8627	61.649	61.2049	61.279	61.3252	59.7791	61.5868	60.9457	61.4455	59.9167	60.9508	61.643	60.6133	61.1975	60.9885	60.7199
2754.35	3630.62	60.6592	60.4766	62.26	61.1865	61.8666	61.3937	57.8891	58.8788	61.0991	61.9326	61.5686	62.3789	63.108	62.195	59.9005	61.7802	61.0379	60.2417	59.4799	59.2369	58.2589	60.4843	61.1638	59.8247	58.8889	59.0443	59.9803	59.1268	59.8626	61.1844	58.7091	60.2172	59.5429	61.3282	60.8833	60.9511	61.0086	59.4668	61.2715	60.6208	61.1322	59.6046	60.6181	61.3171	60.2854	60.8713	60.6768	60.3987
2756.28	3628.08	60.3285	60.1546	61.9304	60.8598	61.5462	61.0674	57.5323	58.549	60.7721	61.6243	61.2465	62.0517	62.7978	61.8771	59.5849	61.4595	60.7277	59.9166	59.1653	58.9015	57.9431	60.1535	60.8394	59.4792	58.5606	58.707	59.6405	58.7833	59.5292	60.8584	58.3822	59.8912	59.2138	61.0009	60.5531	60.62	60.6854	59.1403	60.9495	60.2892	60.8088	59.2769	60.287	60.9866	59.9417	60.5449	60.3476	60.0757
2758.21	3625.54	59.9963	59.8311	61.6004	60.5352	61.2206	60.754	57.1898	58.2171	60.456	61.3099	60.9305	61.7359	62.4827	61.5622	59.2696	61.1393	60.4002	59.5906	58.8433	58.566	57.6256	59.8301	60.5113	59.1466	58.2221	58.3709	59.3016	58.4409	59.1932	60.529	58.0578	59.5656	58.8909	60.6706	60.2212	60.2966	60.3584	58.8156	60.6287	59.9745	60.4849	58.9449	59.9536	60.6575	59.6123	60.2193	60.0167	59.751
2760.14	3623.01	59.6589	59.5023	61.2671	60.1998	60.8906	60.4404	56.829	57.8743	60.1444	60.9784	60.601	61.4207	62.1645	61.2442	58.9461	60.8161	60.0697	59.2599	58.5187	58.2246	57.3183	59.5122	60.1798	58.824	57.886	58.0243	58.9559	58.1103	58.8532	60.194	57.7301	59.2285	58.5559	60.333	59.8866	59.9555	60.024	58.4833	60.2915	59.6511	60.1619	58.6131	59.6012	60.3204	59.2801	59.8786	59.6881	59.4116
2762.06	3620.48	59.315	59.1688	60.9286	59.8607	60.5538	60.1076	56.4645	57.5236	59.8195	60.6327	60.2635	61.0895	61.8439	60.9203	58.6207	60.4867	59.7377	58.9209	58.1855	57.8751	57.01	59.1813	59.8421	58.4926	57.5366	57.6739	58.6048	57.7682	58.5041	59.8548	57.3952	58.8872	58.2155	59.9976	59.5424	59.6165	59.6901	58.1473	59.9504	59.3221	59.8378	58.2734	59.2488	59.9799	58.9378	59.5284	59.3538	59.0596
2763.99	3617.95	58.9619	58.8243	60.5826	59.5135	60.2087	59.7562	56.0973	57.1614	59.4871	60.2974	59.9234	60.738	61.5109	60.5813	58.2831	60.1476	59.3982	58.5739	57.843	57.5281	56.6845	58.8235	59.496	58.1329	57.1828	57.3177	58.2438	57.417	58.1529	59.5097	57.0507	58.5354	57.8707	59.6464	59.1883	59.2687	59.339	57.8064	59.6151	58.9727	59.4975	57.9156	58.8898	59.6262	58.5918	59.1699	59.0022	58.7056
2765.92	3615.43	58.6037	58.4727	60.2273	59.1597	59.8631	59.4175	55.7259	56.8031	59.1532	59.9708	59.5788	60.392	61.169	60.2364	57.9395	59.802	59.066	58.2249	57.4992	57.1831	56.3336	58.4695	59.1446	57.7747	56.828	56.9554	57.8836	57.0611	57.7989	59.1612	56.7003	58.1857	57.5218	59.2892	58.8263	58.9176	58.9836	57.4626	59.2632	58.6047	59.1534	57.5648	58.5302	59.2643	58.2423	58.8117	58.653	58.3596
2767.85	3612.91	58.2354	58.1146	59.8653	58.7971	59.5041	59.078	55.3518	56.4435	58.8064	59.6107	59.2226	60.0486	60.8276	59.8916	57.5911	59.4467	58.7188	57.8665	57.15	56.8255	55.9779	58.114	58.7795	57.4123	56.4511	56.5832	57.515	56.707	57.4337	58.8006	56.338	57.8296	57.1623	58.9251	58.4611	58.5456	58.6168	57.1087	58.8985	58.2392	58.8021	57.2114	58.161	58.8983	57.8871	58.4462	58.292	57.9985
2769.78	3610.4	57.8576	57.7472	59.4931	58.4305	59.1359	58.7161	54.9647	56.0726	58.4423	59.2269	58.8604	59.6858	60.4799	59.5375	57.2325	59.0852	58.3501	57.4974	56.7928	56.4544	55.6187	57.7437	58.4104	57.0354	56.0746	56.1987	57.1356	56.357	57.0543	58.427	55.9727	57.4606	56.7942	58.5591	58.0899	58.1727	58.2408	56.7446	58.5381	57.8883	58.443	56.8483	57.7768	58.5255	57.5158	58.0717	57.9237	57.6258
2771.71	3607.88	57.468	57.3646	59.1074	58.0445	58.7567	58.3333	54.5644	55.6847	58.0646	58.8378	58.4819	59.3094	60.1138	59.165	56.8585	58.7116	57.9701	57.1162	56.4168	56.0623	55.2376	57.3585	58.033	56.6494	55.6961	55.7995	56.7406	55.9835	56.6621	58.0408	55.5947	57.0719	56.4102	58.1756	57.6953	57.7907	57.8565	56.3708	58.1569	57.5284	58.0613	56.4571	57.3753	58.1354	57.1188	57.6836	57.5417	57.2363
2773.64	3605.37	57.0806	56.9857	58.7264	57.6588	58.3747	57.9692	54.1547	55.2897	57.7018	58.4793	58.1008	58.9341	59.7446	58.7924	56.4885	58.3375	57.5974	56.7356	56.0433	55.6616	54.8594	56.9767	57.6503	56.2639	55.3124	55.407	56.3461	55.591	56.2724	57.6616	55.2159	56.6888	56.0257	57.7884	57.3042	57.411	57.4773	56.0011	57.7835	57.153	57.6796	56.0799	56.9887	57.7427	56.7301	57.2961	57.1599	56.8535
2775.57	3602.87	56.7071	56.6204	58.3599	57.2883	58.0036	57.6152	53.7565	54.8998	57.3529	58.126	57.7395	58.5617	59.3911	58.4343	56.1283	57.9747	57.2255	56.3658	55.6808	55.2745	54.4992	56.6012	57.2779	55.8905	54.9284	55.0225	55.9587	55.2091	55.8917	57.2901	54.8472	56.3197	55.6572	57.4056	56.9248	57.0289	57.1111	55.6296	57.4159	56.7727	57.3177	55.709	56.6157	57.3636	56.3581	56.9249	56.7855	56.4784
2777.5	3600.37	56.331	56.2529	57.9883	56.9166	57.6366	57.2485	53.3682	54.5228	57.0025	57.7533	57.3808	58.2024	59.0384	58.0779	55.7675	57.6172	56.8656	55.9996	55.3172	54.8965	54.1432	56.2175	56.9098	55.5123	54.5482	54.6353	55.5779	54.8343	55.5123	56.9173	54.4815	55.9501	55.2893	57.0304	56.5486	56.6526	56.7411	55.2653	57.0445	56.3972	56.9609	55.3342	56.2303	56.9917	55.9891	56.5674	56.4157	56.1105
2779.42	3597.87	55.9394	55.8711	57.5985	56.5256	57.2519	56.8672	52.9626	54.1248	56.633	57.365	56.9957	57.8325	58.6653	57.6985	55.3862	57.239	56.4921	55.615	54.9385	54.5085	53.7604	55.8213	56.5258	55.1211	54.1642	54.2305	55.1777	54.4391	55.118	56.5259	54.096	55.5537	54.8999	56.6409	56.1589	56.2612	56.3466	54.8775	56.6597	56.0114	56.5712	54.9399	55.8272	56.6055	55.6026	56.1736	56.0269	55.7215
2781.35	3595.37	55.5394	55.4807	57.1979	56.1296	56.8576	56.4853	52.5477	53.7232	56.248	56.9688	56.6022	57.4419	58.2834	57.3127	54.9998	56.8534	56.1059	55.2244	54.553	54.1201	53.3696	55.438	56.1308	54.726	53.773	53.8217	54.7706	54.0387	54.7143	56.1264	53.7033	55.1532	54.5079	56.246	55.7607	55.8669	55.95	54.483	56.2673	55.6291	56.1797	54.538	55.4235	56.2047	55.2018	55.7514	55.6327	55.3187
2783.28	3592.88	55.1296	55.0804	56.7888	55.7247	56.4575	56.1064	52.1292	53.3262	55.8484	56.5753	56.2073	57.0315	57.8972	56.9205	54.6108	56.4598	55.7187	54.8252	54.1583	53.7203	52.9896	55.0481	55.7264	54.3141	53.3646	53.4028	54.3561	53.6285	54.3017	55.7218	53.307	54.7506	54.1041	55.835	55.349	55.4572	55.5386	54.0845	55.8654	55.232	55.7815	54.137	55.0167	55.7909	54.7937	55.3311	55.2287	54.9034
2785.21	3590.39	54.7056	54.6681	56.3705	55.3075	56.0466	55.6949	51.708	52.9084	55.4386	56.1774	55.7995	56.6217	57.5029	56.5198	54.2069	56.052	55.315	54.415	53.76	53.3137	52.5969	54.6311	55.3132	53.8892	52.927	52.9733	53.9301	53.2172	53.8839	55.3083	52.8988	54.3367	53.6885	55.4208	54.9232	55.0382	55.1186	53.6794	55.4442	54.817	55.3731	53.7247	54.5973	55.3721	54.3792	54.9267	54.8154	54.4869
2787.14	3587.91	54.2677	54.2387	55.9368	54.8743	55.6185	55.2681	51.2572	52.4745	55.023	55.7464	55.3698	56.2103	57.0853	56.1006	53.7843	55.6288	54.8812	53.9869	53.3388	52.8885	52.1759	54.2025	54.8833	53.4601	52.4873	52.5293	53.4876	52.7895	53.4501	54.8762	52.4722	53.9064	53.2613	54.987	54.4823	54.6064	54.6879	53.2566	55.0053	54.3768	54.946	53.2856	54.1492	54.9356	53.9513	54.4992	54.3857	54.0574
2789.07	3585.43	53.8349	53.8141	55.51	54.4477	55.1947	54.8603	50.8089	52.0381	54.623	55.3218	54.9521	55.7904	56.6719	55.6832	53.3687	55.2146	54.4584	53.5625	52.9227	52.4508	51.759	53.7844	54.4586	53.0323	52.0729	52.089	53.0514	52.3484	53.0159	54.4499	52.0501	53.4776	52.8402	54.5533	54.0556	54.1773	54.2574	52.838	54.5788	53.9389	54.5193	52.8547	53.7025	54.502	53.5315	54.0572	53.9619	53.6266
2791	3582.95	53.4111	53.4021	55.0931	54.0304	54.7775	54.4567	50.3688	51.6056	54.2277	54.9167	54.5386	55.3726	56.2699	55.2768	52.962	54.8089	54.0432	53.149	52.5121	52.0237	51.3646	53.3714	54.0427	52.6078	51.6654	51.6527	52.6236	51.92	52.588	54.0315	51.6326	53.0579	52.4247	54.1256	53.6353	53.7555	53.8417	52.4285	54.1739	53.5306	54.1126	52.4458	53.2719	54.0753	53.115	53.6211	53.547	53.2022
2792.93	3580.47	52.9873	52.9867	54.6708	53.6083	54.357	54.0484	49.9125	51.1738	53.8289	54.5105	54.1225	54.955	55.8623	54.8699	52.5526	54.3984	53.6243	52.7359	52.0988	51.5873	50.9682	52.959	53.6233	52.1849	51.2414	51.2138	52.1904	51.501	52.1625	53.6095	51.2193	52.6385	52.0067	53.701	53.2069	53.3316	53.4236	52.0181	53.7614	53.128	53.7085	52.0207	52.8322	53.6461	52.6957	53.1909	53.1257	52.7788
2794.85	3578	52.5429	52.551	54.23	53.1636	53.9181	53.6216	49.4431	50.7276	53.4063	54.0817	53.6942	54.5194	55.4416	54.4449	52.1271	53.9696	53.2	52.301	51.6707	51.1285	50.543	52.5114	53.1861	51.7451	50.7826	50.7598	51.7389	51.0626	51.7157	53.1669	50.7865	52.2049	51.5711	53.2594	52.7646	52.8888	52.9818	51.5847	53.3233	52.6844	53.2722	51.5785	52.3828	53.1981	52.2493	52.7488	52.6818	52.3405
2796.78	3575.54	52.0882	52.1099	53.7819	52.7132	53.4749	53.1896	48.9809	50.2774	52.962	53.6441	53.2586	54.0863	55.0183	54.0129	51.6957	53.5363	52.773	51.8628	51.2302	50.6796	50.1141	52.0502	52.7451	51.2867	50.324	50.2975	51.2818	50.6145	51.2643	52.7194	50.3457	51.7611	51.1263	52.8172	52.3139	52.4298	52.5312	51.1489	52.8843	52.2395	52.8306	51.1409	51.9342	52.7477	51.8058	52.3029	52.2374	51.8909
2798.71	3573.07	51.6411	51.674	53.3387	52.2663	53.0345	52.7537	48.5263	49.8343	52.5233	53.2144	52.8212	53.6622	54.594	53.5838	51.2695	53.1114	52.3583	51.432	50.7994	50.2465	49.6987	51.605	52.309	50.8368	49.8865	49.8416	50.826	50.1747	50.8178	52.2809	49.9117	51.3193	50.6821	52.3825	51.8612	51.9831	52.0834	50.7115	52.4435	51.794	52.4012	50.6961	51.4852	52.3076	51.3642	51.858	51.7987	51.4367
2800.64	3570.61	51.1993	51.2416	52.9015	51.8302	52.6015	52.3204	48.0617	49.3958	52.0932	52.7906	52.389	53.23	54.173	53.1589	50.8439	52.692	51.9444	51.0047	50.3771	49.8256	49.2699	51.163	51.8792	50.4002	49.4533	49.3923	50.3775	49.7534	50.3758	51.8416	49.4819	50.8826	50.2469	51.9437	51.4181	51.5493	51.6479	50.2744	52.0015	51.3637	51.9779	50.2477	51.0348	51.8679	50.9336	51.4222	51.3622	51.0004
2802.57	3568.15	50.7434	50.7956	52.4515	51.3771	52.1477	51.8855	47.5895	48.9377	51.6561	52.3512	51.9437	52.7746	53.7364	52.7181	50.4014	52.2543	51.5096	50.5592	49.9336	49.3874	48.818	50.728	51.4323	49.9346	48.9924	48.9233	49.9165	49.3056	49.9119	51.3846	49.031	50.4337	49.7986	51.4798	50.9648	51.0895	51.1938	49.8226	51.5383	50.9196	51.5212	49.7898	50.5781	51.4073	50.4822	50.9683	50.9037	50.5508
2804.5	3565.7	50.2761	50.338	51.9903	50.911	51.6849	51.4443	47.12	48.471	51.2156	51.8961	51.4875	52.3169	53.288	52.2695	49.9511	51.8054	51.0567	50.1015	49.4821	48.9204	48.3771	50.2803	50.9728	49.4748	48.5118	48.4449	49.4435	48.8329	49.4444	50.9228	48.5757	49.9707	49.3438	51.0188	50.501	50.6159	50.7319	49.3684	51.0741	50.4583	51.0666	49.3377	50.1061	50.9398	50.0174	50.4987	50.4427	50.0862
2806.43	3563.25	49.7926	49.8639	51.5148	50.434	51.2114	50.9761	46.6304	47.984	50.7631	51.4278	51.0209	51.8609	52.8255	51.8072	49.4892	51.3441	50.58	49.6324	49.0192	48.4363	47.9298	49.8081	50.5014	49.0064	48.0428	47.9546	48.9588	48.3499	48.9656	50.445	48.1112	49.4897	48.8729	50.5377	50.0243	50.1396	50.2589	48.9035	50.6094	49.983	50.6065	48.8663	49.6291	50.4605	49.5379	50.0229	49.9681	49.6139
2808.36	3560.8	49.3053	49.3851	51.0303	49.9498	50.7327	50.5016	46.1275	47.4857	50.3071	50.9643	50.5476	51.3914	52.3591	51.3379	49.0227	50.8752	50.0908	49.1585	48.5496	47.9476	47.472	49.3243	50.0239	48.5307	47.5653	47.4582	48.4699	47.8628	48.4789	49.9597	47.6386	49.0044	48.3902	50.0573	49.5391	49.6581	49.7813	48.4304	50.1408	49.5126	50.1312	48.3838	49.1418	49.9755	49.0635	49.5435	49.489	49.1341
2810.28	3558.36	48.8247	48.9144	50.5532	49.4661	50.2569	50.0397	45.6316	47.0088	49.8439	50.4966	50.0776	50.9162	51.8965	50.8767	48.5608	50.412	49.613	48.6888	48.0859	47.4581	47.0065	48.8598	49.5501	48.0642	47.0896	46.9657	47.9795	47.3761	47.9907	49.4811	47.1671	48.5313	47.9126	49.5758	49.0551	49.1742	49.3022	47.958	49.6684	49.0335	49.6529	47.902	48.6513	49.4918	48.589	49.0482	49.0124	48.6475
2812.21	3555.92	48.3517	48.4506	50.0815	48.9954	49.7894	49.5838	45.154	46.5458	49.3804	50.0211	49.617	50.4534	51.4441	50.4214	48.1063	49.9588	49.1647	48.2296	47.6318	46.983	46.5594	48.4059	49.0844	47.586	46.6243	46.4807	47.4957	46.9067	47.5148	49.0124	46.7089	48.0667	47.4489	49.1049	48.5764	48.6919	48.8273	47.4963	49.2034	48.565	49.188	47.4399	48.1663	49.0132	48.1146	48.5528	48.5423	48.1704
2814.14	3553.48	47.8655	47.9703	49.5942	48.5089	49.3087	49.1104	44.6587	46.0624	48.9028	49.5388	49.1406	49.9759	50.9764	49.9478	47.6326	49.4885	48.7102	47.7542	47.1611	46.499	46.0968	47.9193	48.6028	47.0889	46.137	45.9828	47.0003	46.4221	47.0245	48.5246	46.2355	47.5805	46.9688	48.6129	48.0837	48.1972	48.3359	47.0177	48.7178	48.0877	48.7118	46.9556	47.6673	48.5237	47.6296	48.0604	48.0565	47.6837
2816.07	3551.05	47.368	47.4843	49.0983	48.0127	48.8193	48.6231	44.1514	45.5682	48.4247	49.0619	48.6535	49.4907	50.502	49.4706	47.1535	49.009	48.2439	47.2683	46.6806	46.011	45.6103	47.4197	48.1117	46.5945	45.6454	45.479	46.4991	45.9299	46.5269	48.0306	45.7552	47.0843	46.4832	48.117	47.5943	47.7085	47.8403	46.5358	48.2267	47.5992	48.2375	46.4537	47.1668	48.0296	47.1382	47.565	47.5671	47.1898
2818	3548.62	46.8601	46.9891	48.5927	47.5108	48.3154	48.1401	43.6377	45.0695	47.9414	48.5761	48.152	49.0001	50.0129	48.9785	46.6649	48.5211	47.7563	46.7708	46.1904	45.5141	45.1233	46.9117	47.6118	46.0946	45.1457	44.9672	45.9883	45.426	46.0217	47.5271	45.2607	46.5799	45.9894	47.6152	47.0904	47.2022	47.3377	46.0415	47.7179	47.0986	47.7378	45.9448	46.657	47.5178	46.6305	47.057	47.0625	46.6832
2819.93	3546.19	46.3526	46.4916	48.0855	47.0063	47.81	47.6539	43.1263	44.5616	47.452	48.0763	47.6559	48.4959	49.5184	48.4857	46.1753	48.0318	47.2587	46.2757	45.7018	45.0145	44.6479	46.4117	47.1107	45.5905	44.6425	44.4515	45.4757	44.9312	45.5185	47.0211	44.762	46.0788	45.4877	47.1086	46.5748	46.6881	46.8315	45.5458	47.2103	46.6051	47.2392	45.4449	46.1386	47.0051	46.1136	46.5554	46.5574	46.1725
2821.86	3543.76	45.8374	45.9871	47.5729	46.486	47.2966	47.1525	42.6092	44.0395	46.9641	47.5592	47.1517	47.9781	49.017	47.9844	45.6774	47.5362	46.7375	45.7749	45.2054	44.5097	44.1718	45.9085	46.6023	45.0847	44.1299	43.9244	44.9528	44.4288	45.0029	46.5079	44.261	45.5729	44.9766	46.5942	46.0522	46.168	46.3174	45.0393	46.7056	46.088	46.7418	44.9375	45.6169	46.4873	45.6076	46.0517	46.0436	45.6491
2823.79	3541.34	45.3222	45.4773	47.0595	45.9696	46.7924	46.6468	42.0859	43.5282	46.4762	47.0507	46.646	47.4756	48.5204	47.4839	45.1805	47.0445	46.2213	45.273	44.7139	44.0039	43.688	45.4061	46.0991	44.5789	43.6296	43.4005	44.4339	43.9198	44.489	45.9967	43.7606	45.065	44.468	46.0709	45.5342	45.6526	45.8088	44.5381	46.2036	45.5749	46.2343	44.4332	45.0959	45.9729	45.1112	45.5443	45.5354	45.133
2825.72	3538.93	44.8039	44.9654	46.5436	45.4498	46.2773	46.1415	41.5498	43.0114	45.9726	46.5528	46.1377	46.9816	48.0177	46.9795	44.6797	46.5415	45.719	44.7637	44.2151	43.4879	43.1966	44.8998	45.5901	44.0692	43.1345	42.8745	43.9127	43.4076	43.9744	45.4792	43.2492	44.5425	43.9542	45.5467	45.0158	45.1308	45.2914	44.0328	45.6887	45.0576	45.7153	43.9193	44.5746	45.4492	44.5939	45.0202	45.0155	44.6173
2827.64	3536.51	44.2814	44.4519	46.0229	44.9266	45.7542	45.632	41.0149	42.4921	45.4618	46.0518	45.6265	46.4709	47.5075	46.4687	44.1748	46.0324	45.2256	44.25	43.7146	42.9644	42.7097	44.373	45.0724	43.5518	42.608	42.3458	43.3791	42.8823	43.4481	44.9533	42.74	44.0189	43.4427	45.027	44.4904	44.6096	44.7712	43.5211	45.1602	44.5476	45.203	43.3909	44.0549	44.9202	44.0683	44.4927	44.4905	44.0963
2829.57	3534.1	43.7448	43.9261	45.4865	44.3915	45.2207	45.1048	40.4618	41.9552	44.9369	45.5202	45.0975	45.9315	46.9818	45.9455	43.655	45.5111	44.7201	43.7239	43.1973	42.4252	42.1908	43.838	44.5398	43.0108	42.051	41.8024	42.8348	42.3466	42.9048	44.4149	42.2217	43.4895	42.9175	44.4962	43.9492	44.0733	44.2373	42.9924	44.6273	44.0294	44.6852	42.8624	43.5085	44.3801	43.5325	43.951	43.9523	43.5534
2831.5	3531.69	43.1981	43.3914	44.942	43.8517	44.6806	44.5774	39.9049	41.4075	44.4017	44.9783	44.5581	45.3913	46.451	45.4179	43.1295	44.9847	44.1978	43.1928	42.6711	41.8821	41.6487	43.3141	44.004	42.4586	41.5133	41.252	42.29	41.8114	42.357	43.8709	41.6975	42.9541	42.3829	43.949	43.4061	43.5192	43.699	42.4589	44.0936	43.4833	44.1497	42.3292	42.952	43.8328	42.9901	43.3944	43.4116	43.006
2833.43	3529.29	42.6461	42.8482	44.3896	43.302	44.1336	44.0475	39.3473	40.8663	43.8586	44.4418	44.01	44.8527	45.9123	44.8797	42.59	44.4513	43.6509	42.6537	42.1356	41.3359	41.1142	42.7802	43.4588	41.906	40.9844	40.6949	41.7324	41.2651	41.8092	43.3193	41.1583	42.4021	41.8378	43.3952	42.8458	42.9509	43.1464	41.9151	43.5471	42.9285	43.5997	41.7854	42.3917	43.2764	42.4432	42.8271	42.8622	42.4531
2835.36	3526.89	42.0971	42.3089	43.8374	42.7512	43.5869	43.5139	38.7864	40.3274	43.3261	43.9004	43.4649	44.3116	45.3745	44.3433	42.0542	43.9163	43.1029	42.1151	41.6019	40.7907	40.5879	42.2472	42.9144	41.3581	40.4448	40.1379	41.1739	40.7229	41.2577	42.7682	40.6193	41.8516	41.2931	42.837	42.2891	42.4025	42.5911	41.377	42.999	42.3778	43.0584	41.2369	41.8358	42.7154	41.8926	42.2716	42.3123	41.8993
2837.29	3524.49	41.5416	41.762	43.2793	42.1913	43.0304	42.9638	38.2253	39.7691	42.7918	43.3466	42.9133	43.7605	44.8265	43.7968	41.5119	43.3769	42.5429	41.5659	41.0621	40.2421	40.0533	41.697	42.3612	40.8023	39.8795	39.5685	40.6091	40.167	40.6916	42.206	40.0741	41.293	40.7355	42.2692	41.7252	41.8425	42.0262	40.8242	42.4319	41.8201	42.5029	40.6748	41.2743	42.1447	41.3351	41.7161	41.744	41.328
2839.22	3522.1	40.9931	41.2217	42.7297	41.6386	42.4828	42.4232	37.6758	39.2183	42.2619	42.8081	42.3679	43.2104	44.2891	43.2513	40.9727	42.8421	41.9971	41.0209	40.5302	39.7008	39.5311	41.1391	41.8112	40.247	39.3214	39.0083	40.0506	39.6123	40.1307	41.6479	39.5341	40.7417	40.1831	41.7001	41.1645	41.2772	41.4662	40.2756	41.8654	41.2807	41.9463	40.1089	40.7076	41.5849	40.7817	41.1626	41.1811	40.7547
2841.15	3519.71	40.4406	40.6784	42.1778	41.0823	41.9311	41.8819	37.1269	38.6727	41.7263	42.2567	41.8201	42.6537	43.7485	42.6995	40.4226	42.2968	41.4589	40.4739	39.997	39.1505	39.012	40.5761	41.2579	39.6915	38.7714	38.4478	39.4869	39.0588	39.5719	41.0852	38.9864	40.1795	39.6331	41.1434	40.601	40.6999	40.899	39.7192	41.307	40.7201	41.3903	39.5577	40.1257	41.0125	40.2108	40.5758	40.6021	40.1828
2843.07	3517.32	39.8724	40.1177	41.6087	40.5109	41.3619	41.3273	36.559	38.1122	41.1628	41.6972	41.2521	42.089	43.18	42.124	39.8551	41.7318	40.8992	39.907	39.441	38.5772	38.4641	40.0037	40.6849	39.1178	38.2032	37.8645	38.9025	38.4807	38.9914	40.4989	38.4183	39.5967	39.0628	40.5527	40.0162	40.1019	40.3096	39.1381	40.7179	40.1191	40.8038	38.9848	39.5265	40.4063	39.6238	39.9606	39.9948	39.5835
2845	3514.93	39.2844	39.5352	41.0122	39.9114	40.7657	40.7405	35.964	37.5192	40.5636	41.1079	40.6513	41.4973	42.5857	41.5188	39.2593	41.1347	40.315	39.3077	38.8506	37.9786	37.8785	39.4129	40.0839	38.5108	37.6061	37.2488	38.2855	37.8652	38.3795	39.88	37.8179	38.9808	38.4582	39.934	39.3962	39.47	39.6863	38.5186	40.0946	39.4794	40.1842	38.3476	38.8961	39.7596	38.9937	39.3295	39.3474	38.9274
2846.93	3512.55	38.6941	38.9525	40.4124	39.3079	40.165	40.1446	35.3716	36.9396	39.9584	40.4966	40.0481	40.8916	41.9872	40.9177	38.6595	40.534	39.72	38.7042	38.26	37.3723	37.295	38.8104	39.4768	37.9052	36.9823	36.6349	37.6704	37.2443	37.7595	39.2591	37.2149	38.3615	37.8522	39.297	38.772	38.8385	39.0607	37.8967	39.469	38.8495	39.5505	37.7157	38.2581	39.1093	38.3525	38.6986	38.6988	38.2709
2848.86	3510.17	38.1171	38.3844	39.8321	38.7238	39.5823	39.5749	34.8033	36.3732	39.3847	39.9194	39.4688	40.3091	41.4113	40.3444	38.0884	39.9648	39.1335	38.1316	37.6987	36.7915	36.7393	38.2229	38.8964	37.3272	36.3978	36.0518	37.0814	36.6686	37.173	38.6737	36.639	37.7762	37.2704	38.7132	38.1756	38.2391	38.4723	37.3107	38.8849	38.2658	38.9613	37.1401	37.655	38.5072	37.7695	38.0991	38.0996	37.6728
2850.79	3507.8	37.5579	37.8343	39.2712	38.1699	39.0314	39.033	34.2521	35.8173	38.8549	39.3878	38.9261	39.7608	40.8716	39.8077	37.5561	39.4334	38.5793	37.5964	37.1681	36.2488	36.2086	37.6679	38.3517	36.7833	35.866	35.5043	36.5291	36.1492	36.6223	38.1287	36.1059	37.232	36.7259	38.1678	37.6246	37.6977	37.9368	36.7764	38.3455	37.7313	38.4325	36.617	37.1062	37.9646	37.246	37.5607	37.5689	37.146
2852.72	3505.43	36.9987	37.2829	38.7135	37.6174	38.4811	38.4887	33.6896	35.2721	38.3297	38.8547	38.39	39.216	40.3353	39.2781	37.0322	38.9058	38.0308	37.0612	36.6409	35.7079	35.686	37.1402	37.811	36.2437	35.3453	34.9612	35.981	35.606	36.0837	37.5864	35.5808	36.6979	36.19	37.6326	37.0872	37.1688	37.4098	36.2558	37.8008	37.205	37.9121	36.0817	36.5743	37.4321	36.7142	37.0398	37.0504	36.625
2854.65	3503.06	36.4425	36.7323	38.154	37.0628	37.929	37.9434	33.1388	34.7169	37.804	38.3057	37.8496	38.6784	39.7912	38.7458	36.5092	38.3774	37.4906	36.5248	36.1167	35.174	35.175	36.625	37.2709	35.6943	34.8123	34.4166	35.4317	35.0679	35.5459	37.042	35.0556	36.1633	35.6573	37.0851	36.5475	36.635	36.8719	35.7386	37.2647	36.6803	37.3797	35.5509	36.0468	36.9057	36.1769	36.5185	36.5235	36.0997
2856.58	3500.69	35.8754	36.1696	37.5831	36.4988	37.3658	37.3868	32.5754	34.1641	37.2678	37.7493	37.2927	38.1287	39.234	38.1947	35.9713	37.8365	36.9604	35.9745	35.5824	34.6341	34.648	36.077	36.7226	35.1446	34.2375	33.8608	34.869	34.5173	34.9913	36.4871	34.5191	35.6183	35.1152	36.53	35.9957	36.0747	36.3178	35.2042	36.7212	36.1401	36.8366	35.0055	35.5034	36.3643	35.6438	35.982	35.9817	35.559
2858.51	3498.33	35.3037	35.6059	37.0152	35.9338	36.7995	36.8331	32.0087	33.6262	36.7207	37.2069	36.7382	37.5612	38.6811	37.6434	35.4298	37.2931	36.4328	35.4239	35.0477	34.0804	34.1178	35.5188	36.1717	34.602	33.6827	33.3004	34.3048	33.9687	34.4369	35.9318	33.9809	35.0693	34.5723	35.9696	35.4407	35.5176	35.7642	34.6645	36.175	35.5975	36.2935	34.4765	34.9504	35.8166	35.1057	35.4395	35.4438	35.0173
2860.43	3495.97	34.7295	35.0439	36.4503	35.3674	36.2328	36.2759	31.4447	33.0724	36.1568	36.6562	36.1814	36.9899	38.1234	37.0911	34.8865	36.7465	35.9001	34.8727	34.5124	33.5254	33.5798	34.9658	35.6185	34.0479	33.1437	32.7375	33.7411	33.4218	33.8825	35.3765	33.44	34.5136	34.0248	35.4153	34.882	34.9603	35.2056	34.1189	35.6331	35.0504	35.7469	33.9407	34.3995	35.265	34.5521	34.8961	34.8988	34.4702
2862.36	3493.62	34.1636	34.4858	35.8895	34.8031	35.6679	35.7263	30.8795	32.5211	35.5998	36.1038	35.623	36.4375	37.5625	36.5423	34.3424	36.203	35.3603	34.3204	33.9854	32.9768	33.0417	34.4197	35.0691	33.4881	32.5949	32.1807	33.1821	32.874	33.3285	34.8225	32.9011	33.9637	33.4793	34.8558	34.3245	34.4058	34.6458	33.5789	35.091	34.5092	35.2026	33.3882	33.851	34.7103	34.0063	34.3393	34.3539	33.9244
2864.29	3491.26	33.5874	33.9144	35.3126	34.225	35.0881	35.1573	30.3101	31.9491	35.0348	35.5285	35.0508	35.8732	36.9863	35.9719	33.7816	35.6413	34.7876	33.7535	33.433	32.4154	32.4873	33.8672	34.4988	32.9287	32.0186	31.6107	32.6084	32.3102	32.7564	34.2484	32.3465	33.3987	32.9175	34.2849	33.7473	33.8312	34.0698	33.0166	34.5161	33.9435	34.6469	32.8176	33.2788	34.1388	33.4536	33.7551	33.7907	33.3598
2866.22	3488.92	33.0092	33.3434	34.729	33.6468	34.512	34.5859	29.745	31.3706	34.4701	34.9441	34.4778	35.297	36.4133	35.398	33.2256	35.0812	34.21	33.1906	32.8784	31.8534	31.9337	33.2969	33.9281	32.3644	31.452	31.0395	32.0312	31.7462	32.1854	33.674	31.7916	32.8289	32.3535	33.708	33.176	33.2508	33.4937	32.4513	33.9432	33.3749	34.0754	32.2507	32.6997	33.5637	32.8857	33.1826	33.2204	32.7849
[truncated: 614 more rows]
[truncated: 42 more columns]
