# Supplementary material
Source: MDPI journal article supplement (https://www.mdpi.com/2073-4441/13/11/1475)
Supplement: s1 [file s1 › Supplementary files/S1_1_15032017_File.xls]

## Sheet: Лист1
	veb	lyd	lyd	lyd	veb	hc	hgch	lyd	all	hc	hypl	all	all	K	veb	K	lyd	veb	K	lyd	hc	K	all	hc	lyd	all	K	hgch	hc	all	hypl	veb	hc	hgch	hypl	lyd	veb	hc	hc	veb	veb	veb	hcgh	veb	hc	hypl	hypl	all	hgch
WL_cm-1	1	2	3	4	5	6	7	8	9	10	11	12	13	14	15	16	17	18	19	20	21	22	23	24	25	26	27	28	29	30	31	32	33	34	35	36	37	38	39	40	41	42	43	44	45	46	47	48	49
948.977	1.29529	1.214	1.25003	1.48193	1.11669	0.890457	1.27301	1.14047	1.00657	1.05053	1.0687	0.949942	1.02982	1.05039	1.22287	1.15028	1.62279	1.13481	1.14616	1.49106	0.724383	1.03657	1.14289	1.02408	1.24723	1.16854	1.46973	1.30086	0.890609	1.12044	0.569301	1.08205	0.991372	1.14296	1.21397	0.97511	0.693925	0.993548	1.436	1.08522	1.23703	1.39021	1.01603	1.61269	0.872776	0.986957	1.18446	1.16215	1.12324
950.906	0.967184	0.830418	0.980854	1.09943	0.81948	0.605087	0.976074	0.847422	0.7564	0.771006	0.751292	0.833719	0.769465	0.861998	0.981796	0.826739	1.29926	0.921975	0.824921	1.07005	0.779517	0.694936	0.745962	0.871032	0.932412	0.817359	1.17816	1.0484	0.462716	0.885021	0.520763	0.641004	0.893376	0.791782	0.56221	0.734919	0.635263	0.796893	0.956417	0.854387	0.704828	1.09018	0.821618	1.18976	0.615237	0.616023	0.882386	0.844857	0.816941
952.835	0.914541	0.822936	0.937585	0.899522	0.873733	0.652622	0.924233	0.868451	0.741186	0.835675	0.695683	0.818605	0.78851	0.849181	0.948991	0.843518	1.24355	0.819596	0.711354	0.75035	0.975465	0.619205	0.572887	1.01087	1.15553	0.855741	1.07985	1.05981	0.452872	0.842896	0.593791	0.618262	0.816798	0.833809	0.579066	0.836302	0.553459	0.657545	0.679879	0.930811	0.735422	0.928059	0.843693	1.18245	0.630677	0.761909	0.836468	0.668509	0.962763
954.764	0.718527	0.646956	0.605454	0.705493	0.652514	0.568986	0.692421	0.599407	0.466985	0.578218	0.487635	0.607678	0.56256	0.56593	0.625952	0.637574	0.928028	0.515344	0.365545	0.409165	0.704592	0.434439	0.558965	0.766662	0.864602	0.663009	0.732036	0.797305	0.673328	0.6316	0.368443	0.626684	0.653044	0.727186	0.597851	0.633566	0.22526	0.485483	0.415225	0.58344	0.616938	0.639675	0.516529	0.899563	0.407653	0.351708	0.587225	0.514619	0.819807
956.693	0.733511	0.641806	0.577127	0.593657	0.590215	0.49927	0.737254	0.57471	0.484236	0.524126	0.523506	0.570926	0.557564	0.546787	0.673442	0.676107	0.949968	0.566349	0.439965	0.539846	0.541261	0.464252	0.668099	0.476835	0.732666	0.675628	0.608213	0.70261	0.827716	0.714985	0.346662	0.601973	0.687606	0.631836	0.456212	0.57295	0.226449	0.52394	0.507618	0.630229	0.478941	0.607827	0.499393	0.918257	0.388792	0.384695	0.535896	0.634251	0.741718
958.622	0.48263	0.650695	0.257828	0.428857	0.273613	0.310089	0.58858	0.319524	0.255986	0.261588	0.332874	0.490927	0.297441	0.398443	0.51462	0.424297	0.73789	0.37642	0.213296	0.476586	0.346119	0.355865	0.407056	0.181733	0.658744	0.533545	0.336034	0.425985	0.352031	0.542065	0.274327	0.348879	0.371694	0.278971	0.196571	0.369786	0.088206	0.322537	0.407059	0.467592	0.224246	0.384086	0.268737	0.510134	0.173366	0.331174	0.217687	0.135124	0.263159
960.55	0.469716	0.709238	0.219422	0.386003	0.264221	0.389704	0.533303	0.287954	0.268498	0.281589	0.288136	0.491943	0.312643	0.393953	0.512011	0.34708	0.731696	0.302125	0.172984	0.501746	0.418057	0.386035	0.420088	0.109726	0.419425	0.425244	0.324285	0.427691	0.436537	0.467531	0.202842	0.268892	0.280773	0.304853	0.164311	0.291332	0.130633	0.30654	0.394416	0.355073	0.300999	0.369466	0.258876	0.468963	0.135972	0.229616	0.176932	0.040955	0.092314
962.479	0.317047	0.376218	0.085969	0.33855	0.120244	0.290669	0.287345	0.095594	0.04613	0.10594	0.111243	0.406705	0.125759	0.128431	0.239344	0.234059	0.509189	0.09857	0.095275	0.260218	0.480259	0.315105	0.402332	0.185776	0.625452	0.179672	0.13565	0.197354	0.59092	0.148953	0.06902	0.224475	0.150646	0.152973	0.031685	0.062278	0.206732	0.135073	0.239086	0.151778	0.092565	0.177114	0.169362	0.298118	0.143173	0.083138	0.05097	0.143339	0.097891
964.408	0.216766	0.314383	0.08761	0.276968	0.088101	0.227018	0.249518	0.111611	0.035615	0.077168	0.125022	0.361931	0.086966	0.11137	0.055851	0.234218	0.439348	0.172145	0.187047	0.118131	0.385259	0.220333	0.272868	0.154119	0.286293	0.107385	0.119802	0.179821	0.334475	0.116044	0.034638	0.200909	0.204839	0.070891	0.172623	0.003576	0.22625	0.094737	0.197113	0.080733	0.055751	0.116887	0.153669	0.316751	0.105032	0.117613	0.123507	0.095733	0.044099
966.337	0.249267	0.252233	0.252279	0.291179	0.149029	0.194365	0.183982	0.080303	0.149203	0.19002	0.080367	0.265694	0.11572	0.05646	0.156918	0.109907	0.24133	0.028134	0.186197	0.132164	0.283522	0.118619	0.242126	0.257722	0.22649	0.200111	0.209448	0.171588	0.335456	0.164987	0.225527	0.159367	0.139179	0.232217	0.244917	0.160268	0.416918	0.276665	0.261082	0.169626	0.287707	0.20448	0.32668	0.339487	0.251885	0.236911	0.244816	0.193669	0.323831
968.266	0.236812	0.121398	0.347114	0.190346	0.179708	0.186339	0.114765	0.115699	0.177498	0.203753	0.156608	0.214141	0.15343	0.115121	0.184597	0.071541	0.158411	0.146014	0.18508	0.078398	0.219594	0.282434	0.292844	0.253542	0.258906	0.209548	0.267299	0.138592	0.527944	0.236869	0.290189	0.150864	0.141996	0.162029	0.272313	0.16974	0.438186	0.261263	0.435704	0.186635	0.474499	0.251309	0.342984	0.363238	0.308228	0.249078	0.385639	0.248198	0.396695
970.194	0.378747	0.360865	0.529989	0.433033	0.422675	0.299513	0.208612	0.316117	0.348536	0.375604	0.359451	0.212064	0.330946	0.312354	0.28113	0.242129	0.220664	0.355509	0.382834	0.239861	0.285381	0.334199	0.429909	0.393913	0.371523	0.348883	0.335068	0.274223	0.353985	0.38199	0.481574	0.370778	0.298259	0.333992	0.273293	0.414909	0.539467	0.404993	0.525757	0.236213	0.591241	0.475499	0.469345	0.556474	0.495465	0.556783	0.600301	0.504952	0.558927
972.123	0.431673	0.434626	0.497052	0.437646	0.415482	0.365354	0.270846	0.362459	0.399723	0.40527	0.371028	0.214986	0.360744	0.370549	0.227158	0.21921	0.24014	0.327618	0.406329	0.34677	0.310842	0.367586	0.438721	0.440809	0.422178	0.388712	0.484379	0.363708	0.614114	0.360864	0.583124	0.528276	0.400433	0.458786	0.489156	0.514262	0.554349	0.471891	0.532797	0.251883	0.470407	0.509363	0.5265	0.598995	0.503832	0.562217	0.602473	0.415881	0.630449
974.052	0.592683	0.522717	0.655502	0.567205	0.53493	0.45334	0.393362	0.52651	0.572094	0.599971	0.516758	0.265457	0.513359	0.517945	0.351008	0.337634	0.405874	0.48413	0.541124	0.564588	0.487876	0.468209	0.564313	0.657283	0.512854	0.528495	0.651632	0.550284	0.46604	0.476175	0.760444	0.6944	0.619769	0.575877	0.847454	0.631983	0.694726	0.675193	0.669279	0.496871	0.675928	0.658886	0.728152	0.779332	0.652562	0.736392	0.766794	0.572507	0.771639
975.981	0.638828	0.619948	0.731751	0.702263	0.65019	0.483141	0.433342	0.5773	0.634448	0.660327	0.571394	0.241336	0.546925	0.592542	0.406537	0.394704	0.444579	0.553079	0.611163	0.622871	0.5666	0.528545	0.624622	0.748832	0.535107	0.563364	0.656367	0.519801	0.448651	0.54065	0.818359	0.688203	0.679818	0.598573	0.839591	0.67489	0.741908	0.77727	0.695947	0.625031	0.754301	0.695677	0.752728	0.874844	0.70744	0.826147	0.788803	0.722335	0.801743
977.91	0.844871	0.859152	0.955723	0.908981	0.853735	0.652881	0.605771	0.75243	0.808176	0.853695	0.729012	0.325188	0.712316	0.771345	0.599488	0.589366	0.671555	0.762761	0.814571	0.754236	0.651347	0.740748	0.810038	0.925577	0.736623	0.740124	0.867452	0.685936	0.906121	0.738739	0.947245	0.781535	0.846142	0.813081	0.881121	0.83597	0.930593	0.948003	0.817519	0.79007	0.950421	0.968398	0.949406	1.06173	0.907915	0.925933	0.899213	0.957217	0.972637
979.839	0.926212	0.85154	1.04882	0.974717	0.861569	0.703566	0.643135	0.819552	0.855859	0.922126	0.78788	0.376077	0.803309	0.781134	0.700311	0.681902	0.718409	0.848162	0.905985	0.767928	0.733549	0.77019	0.898991	1.05492	0.901603	0.829756	0.947774	0.798758	1.0594	0.797856	1.0503	0.872383	0.958785	0.975258	1.01898	0.932879	1.04571	1.02321	0.939629	0.853029	1.04658	1.06836	1.01438	1.15037	0.994051	0.984517	0.975832	1.07331	1.07892
981.767	1.07396	0.984405	1.20888	1.15318	1.04851	0.831594	0.798441	0.985573	1.02331	1.1123	0.96099	0.448771	0.988732	0.955696	0.826755	0.820212	0.873677	1.00541	1.10162	0.962827	0.907647	0.921137	1.09359	1.16928	1.10637	1.01231	1.09219	0.986644	1.03853	0.974193	1.21443	1.07911	1.06987	1.13764	1.16212	1.16409	1.27886	1.1848	1.13433	1.03641	1.21602	1.25734	1.20779	1.35607	1.16496	1.15659	1.19101	1.2735	1.31113
983.696	1.13662	1.02367	1.28157	1.36408	1.15517	0.879179	0.869321	1.04456	1.10102	1.16913	1.04603	0.445459	1.03776	1.00273	0.795723	0.853672	0.946572	1.06871	1.20083	1.08889	0.949564	1.0435	1.16586	1.15285	1.23323	1.08599	1.14057	1.08044	1.27424	1.04746	1.27815	1.18495	1.10627	1.09739	1.13808	1.25292	1.38465	1.27234	1.23765	1.14447	1.261	1.32961	1.33814	1.48079	1.24895	1.22513	1.29592	1.27925	1.34186
985.625	1.32791	1.19285	1.47993	1.45625	1.37993	1.03521	1.01769	1.208	1.28087	1.3521	1.19937	0.530716	1.19374	1.14187	0.913465	1.0144	1.10673	1.2713	1.34396	1.27634	1.08238	1.15456	1.26451	1.40229	1.46261	1.23839	1.33885	1.24683	1.6235	1.23409	1.42086	1.3737	1.28275	1.312	1.3242	1.43454	1.54641	1.44405	1.48292	1.40838	1.46996	1.49003	1.54808	1.66734	1.40426	1.43632	1.46251	1.51875	1.53811
987.554	1.36972	1.32821	1.58712	1.50308	1.49938	1.12134	1.10196	1.29338	1.33538	1.4288	1.2692	0.579318	1.26214	1.23887	0.992626	1.04484	1.18061	1.38003	1.37617	1.33109	1.228	1.18217	1.28754	1.43632	1.5483	1.29027	1.4777	1.2717	1.55567	1.30793	1.55223	1.46759	1.42501	1.50539	1.51857	1.55314	1.5891	1.54356	1.54778	1.5034	1.51463	1.5844	1.61066	1.73247	1.45187	1.48385	1.55686	1.62243	1.62591
989.483	1.53685	1.63149	1.79107	1.74719	1.67578	1.27946	1.26906	1.45946	1.48476	1.58586	1.42497	0.676766	1.43058	1.42217	1.19295	1.14114	1.42027	1.50287	1.54049	1.46494	1.3507	1.35017	1.47592	1.54005	1.62448	1.46655	1.66889	1.41023	1.76911	1.46177	1.71931	1.64448	1.56476	1.66921	1.69242	1.70049	1.71829	1.72391	1.68073	1.6379	1.64038	1.80975	1.7763	1.99846	1.64362	1.68379	1.75321	1.75644	1.80303
991.411	1.66338	1.76056	1.8795	1.79263	1.74222	1.3334	1.35636	1.55232	1.5904	1.68979	1.48376	0.716131	1.52445	1.47661	1.25803	1.21149	1.56042	1.57092	1.61743	1.53764	1.32098	1.46371	1.61661	1.64216	1.72677	1.58112	1.64105	1.51754	1.99966	1.51101	1.78263	1.73216	1.5978	1.69977	1.70711	1.77657	1.78002	1.80311	1.7925	1.75747	1.78828	1.94549	1.90217	2.08882	1.7405	1.82728	1.83724	1.85931	1.93623
993.34	1.87093	1.78814	2.04492	1.98696	1.92131	1.46682	1.50815	1.73812	1.76941	1.87585	1.64359	0.791039	1.69529	1.61466	1.38817	1.4219	1.70877	1.72959	1.80593	1.73617	1.46076	1.63455	1.8038	1.77051	1.75259	1.74707	1.76979	1.72088	1.76794	1.6921	1.93179	1.90525	1.77062	1.85651	1.86532	1.93817	1.88331	1.98524	1.96301	1.95047	1.98517	2.10841	2.10085	2.26508	1.89448	1.97451	2.0328	2.05866	2.14181
995.269	1.88969	1.78258	2.15678	2.12348	2.05058	1.5618	1.57963	1.83024	1.8444	1.95955	1.76098	0.831158	1.77679	1.7152	1.42526	1.54168	1.77329	1.82095	1.90124	1.85556	1.63102	1.67807	1.89075	1.85467	1.77092	1.83606	1.87468	1.84775	1.64088	1.77757	2.03028	2.07872	1.88631	2.00761	2.03032	2.03013	2.03735	2.09563	2.11159	2.015	2.09559	2.20302	2.16515	2.39371	1.96465	2.0892	2.17145	2.1479	2.24488
997.198	2.03276	1.98503	2.36022	2.36565	2.22512	1.70255	1.73761	1.97776	1.99997	2.13085	1.92155	0.933984	1.9291	1.91075	1.54829	1.68847	1.87903	2.01292	2.09722	2.01912	1.78035	1.7825	2.00381	2.02863	1.96405	1.99139	2.08822	2.01187	2.15885	1.92151	2.20059	2.26312	2.0421	2.16654	2.14497	2.20789	2.29386	2.27566	2.32974	2.19702	2.38469	2.39347	2.34279	2.59978	2.12289	2.27775	2.35957	2.34049	2.35477
999.127	2.19625	2.13516	2.48888	2.39631	2.30294	1.76848	1.84011	2.06795	2.09596	2.22667	1.99353	0.987924	2.01223	2.03478	1.63499	1.7485	1.95783	2.08844	2.20094	2.09308	1.85136	1.88159	2.10795	2.12204	2.11182	2.09797	2.25268	2.10087	2.30126	2.01675	2.33598	2.3531	2.15935	2.22069	2.1858	2.31445	2.40089	2.37593	2.42456	2.36882	2.5242	2.51403	2.47477	2.65848	2.23369	2.34984	2.45256	2.41503	2.45925
1001.06	2.40304	2.31411	2.66573	2.56686	2.46105	1.9136	2.00685	2.26387	2.25011	2.4001	2.14594	1.07636	2.17378	2.20849	1.75966	1.87515	2.15646	2.25962	2.36626	2.23683	1.9808	2.05883	2.30085	2.28908	2.31601	2.26218	2.44722	2.27569	2.18247	2.19426	2.52447	2.49661	2.34186	2.40121	2.42105	2.514	2.55766	2.55925	2.53816	2.49459	2.65515	2.70582	2.66226	2.84983	2.42214	2.52925	2.63667	2.61615	2.6886
1002.98	2.49839	2.45739	2.76546	2.67622	2.57121	2.00014	2.08604	2.37731	2.34154	2.50967	2.25259	1.12006	2.27923	2.29703	1.84373	1.96048	2.28064	2.39291	2.46263	2.3584	2.06447	2.186	2.47218	2.3762	2.49628	2.36678	2.50398	2.38175	2.31223	2.31828	2.6238	2.61264	2.46552	2.54962	2.56413	2.6432	2.65421	2.67778	2.68624	2.59103	2.76738	2.83364	2.77289	2.9834	2.53834	2.62005	2.7648	2.80608	2.78708
1004.91	2.68251	2.68848	2.95354	2.84318	2.76607	2.15262	2.23031	2.53599	2.51454	2.68998	2.40844	1.21785	2.44075	2.44335	2.02353	2.09169	2.45661	2.55305	2.65398	2.5564	2.20334	2.34901	2.64255	2.55206	2.69373	2.53043	2.6781	2.54606	2.69853	2.48616	2.74715	2.80127	2.67421	2.72379	2.64149	2.79273	2.80953	2.85164	2.89333	2.83285	2.96249	3.06052	2.9392	3.14801	2.70145	2.82216	2.96594	2.97541	2.99828
1006.84	2.80412	2.80855	3.08392	3.05216	2.8985	2.26952	2.34929	2.63652	2.59909	2.81627	2.51439	1.28359	2.55096	2.5595	2.14317	2.17161	2.56667	2.65054	2.74078	2.67168	2.32564	2.46509	2.68333	2.64504	2.78029	2.62388	2.77112	2.65007	2.7916	2.59896	2.87841	2.91194	2.80231	2.84187	2.7427	2.91492	2.95528	2.97258	3.03428	2.96354	3.07574	3.18987	3.07078	3.2814	2.78423	2.95213	3.08921	3.06105	3.13185
1008.77	2.9722	2.93773	3.27655	3.26173	3.0828	2.4099	2.509	2.81635	2.74935	2.9856	2.69017	1.37911	2.73076	2.73136	2.29647	2.30504	2.74941	2.82984	2.91004	2.81647	2.47139	2.63103	2.86334	2.8407	3.01675	2.78506	2.9279	2.83699	2.93063	2.7701	3.06836	3.05898	2.92673	3.00964	2.95753	3.09897	3.14502	3.14164	3.19484	3.06961	3.29263	3.39381	3.28027	3.48613	2.93887	3.10428	3.28726	3.26507	3.32801
1010.7	3.07542	3.01809	3.40382	3.3348	3.20804	2.47445	2.60998	2.93576	2.87761	3.10152	2.8008	1.42934	2.83188	2.83184	2.39089	2.39618	2.88311	2.96055	3.05876	2.91532	2.56343	2.75152	3.04387	3.03484	3.20228	2.89834	3.03268	2.98644	3.12507	2.8735	3.18605	3.16009	3.08503	3.13265	3.08845	3.23239	3.25675	3.29815	3.27087	3.19029	3.44361	3.52499	3.39706	3.61306	3.06252	3.24968	3.43547	3.41089	3.41718
1012.63	3.25753	3.13476	3.58106	3.49489	3.40895	2.61873	2.76896	3.12443	3.06233	3.29898	2.95569	1.52686	2.99674	2.99445	2.52589	2.57723	3.05055	3.1388	3.23927	3.08867	2.72988	2.90969	3.24665	3.19186	3.30209	3.07162	3.22508	3.14807	3.37733	3.04961	3.39026	3.34586	3.28585	3.27157	3.2172	3.41583	3.46422	3.512	3.454	3.40704	3.58025	3.71645	3.57478	3.79675	3.27229	3.43486	3.61491	3.63223	3.57432
1014.56	3.3968	3.3077	3.72702	3.65485	3.54204	2.73225	2.89446	3.26406	3.17846	3.42565	3.06932	1.58772	3.11068	3.10936	2.59711	2.68921	3.13457	3.25901	3.32855	3.23363	2.87191	3.00974	3.37035	3.26002	3.37666	3.18845	3.41576	3.27177	3.36714	3.16588	3.53445	3.49379	3.3857	3.41858	3.34298	3.54579	3.65693	3.63562	3.65471	3.54435	3.73022	3.86325	3.71088	3.93283	3.41305	3.55617	3.74329	3.76723	3.73322
1016.49	3.56594	3.55909	3.93103	3.85185	3.70506	2.88162	3.06512	3.43214	3.34785	3.60176	3.24715	1.6716	3.28339	3.28199	2.72217	2.81256	3.30562	3.42496	3.50988	3.43376	3.00977	3.17366	3.51739	3.39343	3.52953	3.35731	3.64531	3.45493	3.47709	3.32519	3.67125	3.68225	3.52507	3.62786	3.58207	3.72496	3.8347	3.78001	3.86767	3.71793	3.95556	4.05168	3.88876	4.10169	3.58413	3.7707	3.93331	3.91012	3.93193
1018.41	3.70651	3.69822	4.05585	3.94736	3.82871	2.99118	3.16956	3.5554	3.47881	3.7404	3.37291	1.74169	3.41117	3.40891	2.835	2.89173	3.45703	3.54863	3.64902	3.54035	3.14232	3.28375	3.62752	3.5185	3.59942	3.48546	3.72506	3.56947	3.73326	3.44701	3.79726	3.83076	3.67821	3.76911	3.7185	3.87968	3.94972	3.92916	3.99195	3.88716	4.08636	4.17509	4.00664	4.25301	3.68808	3.87491	4.06089	4.05381	4.08327
1020.34	3.89095	3.84821	4.25118	4.1824	4.02651	3.14179	3.3335	3.73124	3.63796	3.91198	3.54015	1.84461	3.57603	3.585	3.00048	3.05342	3.64895	3.73846	3.79708	3.70064	3.2954	3.42626	3.77668	3.71685	3.85047	3.66045	3.87395	3.74734	3.92315	3.64748	3.97001	3.99058	3.8662	3.94056	3.84298	4.05919	4.11207	4.13503	4.16526	4.0765	4.27511	4.37959	4.20195	4.44032	3.86229	4.06601	4.2704	4.27001	4.2942
1022.27	3.99994	3.93702	4.41124	4.30949	4.16821	3.24685	3.46577	3.86842	3.75748	4.03429	3.66275	1.90463	3.70091	3.72329	3.12102	3.17466	3.79497	3.85966	3.9239	3.84188	3.37189	3.58706	3.89238	3.89462	4.05448	3.78615	4.02072	3.89889	4.00192	3.77704	4.10279	4.14856	3.97467	4.05304	3.99856	4.20604	4.2747	4.26158	4.33147	4.1963	4.41584	4.54335	4.34784	4.56175	3.99492	4.21819	4.43569	4.40458	4.42565
1024.2	4.19189	4.10632	4.60893	4.5262	4.3255	3.40392	3.63047	4.05454	3.9198	4.21932	3.82129	1.99841	3.8783	3.89564	3.26127	3.32224	3.98515	4.03097	4.11607	4.03964	3.5576	3.76422	4.05932	4.1204	4.19345	3.97002	4.22802	4.06907	4.14131	3.92351	4.29427	4.34061	4.1516	4.26607	4.20925	4.39931	4.49331	4.4462	4.50789	4.38963	4.6041	4.72772	4.54324	4.78672	4.17783	4.38791	4.66005	4.60083	4.64444
1026.13	4.3506	4.25069	4.76797	4.694	4.46048	3.52183	3.74509	4.19233	4.04781	4.35888	3.94544	2.08046	4.00671	4.03247	3.34467	3.41179	4.12448	4.20625	4.27454	4.1838	3.74521	3.88229	4.20848	4.2387	4.34839	4.12082	4.37446	4.18352	4.36676	4.05729	4.46043	4.48935	4.32828	4.44936	4.31001	4.54586	4.61941	4.60177	4.67674	4.55349	4.7535	4.87022	4.70043	4.95851	4.33242	4.52942	4.82229	4.73195	4.80046
1028.06	4.5453	4.44975	4.97795	4.84533	4.66192	3.671	3.91053	4.37609	4.22853	4.55562	4.12549	2.18955	4.18044	4.20374	3.4967	3.5464	4.28956	4.39384	4.46817	4.36297	3.89212	4.0504	4.38562	4.37718	4.57634	4.30108	4.55405	4.37139	4.61221	4.2247	4.62855	4.66191	4.51346	4.58973	4.43788	4.73475	4.80358	4.79763	4.86095	4.74145	4.97154	5.10972	4.90713	5.16291	4.51799	4.71472	5.00532	4.93136	4.98682
1029.99	4.67025	4.63573	5.11886	4.96271	4.83477	3.77821	4.03794	4.52363	4.36355	4.70794	4.26522	2.26942	4.32325	4.32966	3.619	3.66956	4.41805	4.50646	4.61729	4.47322	3.97457	4.17615	4.5405	4.51763	4.73154	4.43023	4.69903	4.544	4.66393	4.35875	4.77499	4.83582	4.64203	4.74157	4.62376	4.88298	4.95791	4.96605	5.01213	4.8975	5.12098	5.29233	5.07055	5.31077	4.6489	4.87401	5.16512	5.10517	5.12617
1031.92	4.87576	4.81902	5.31147	5.19115	5.04664	3.93463	4.19644	4.70044	4.53037	4.89427	4.43855	2.37448	4.49934	4.50727	3.77764	3.82986	4.60919	4.66992	4.80382	4.63639	4.1165	4.34293	4.72781	4.6923	4.85062	4.60452	4.92292	4.7328	4.84316	4.53076	4.9809	5.02705	4.81198	4.92487	4.83607	5.06353	5.14817	5.14413	5.22028	5.06796	5.31563	5.49675	5.26777	5.53143	4.81513	5.06477	5.37536	5.31151	5.31834
1033.85	5.05241	4.92616	5.47855	5.40567	5.17412	4.0494	4.33215	4.84375	4.66158	5.04508	4.56842	2.44938	4.63563	4.64522	3.89789	3.9565	4.76228	4.81861	4.96601	4.79587	4.26977	4.4742	4.85603	4.85555	5.02043	4.75149	5.07872	4.86353	5.097	4.69123	5.11925	5.18332	4.97984	5.07142	4.95663	5.22142	5.30404	5.30815	5.34813	5.21174	5.47844	5.6446	5.42666	5.68085	4.96119	5.20936	5.5333	5.45763	5.49652
1035.77	5.23737	5.07085	5.67695	5.54674	5.34643	4.20187	4.50615	5.03296	4.83158	5.23144	4.74304	2.54849	4.81487	4.82774	4.04105	4.10154	4.96624	5.01723	5.14951	5.0109	4.46403	4.62024	5.02546	5.06637	5.20873	4.92132	5.2473	5.04876	5.24574	4.88626	5.27927	5.35525	5.17708	5.26253	5.11423	5.41714	5.49781	5.52037	5.57019	5.41801	5.67814	5.84957	5.6264	5.86306	5.1507	5.4129	5.73409	5.65243	5.70962
1037.7	5.36302	5.18751	5.82357	5.70507	5.51206	4.33409	4.63368	5.17823	4.96595	5.36522	4.88511	2.62115	4.95493	4.97273	4.18197	4.21827	5.11561	5.14311	5.28453	5.15869	4.59947	4.77981	5.17292	5.2323	5.3114	5.05447	5.38834	5.19383	5.28753	5.01437	5.43368	5.50545	5.33653	5.43206	5.32087	5.58684	5.68053	5.67102	5.79253	5.57528	5.86515	6.02106	5.78933	6.05155	5.30632	5.54836	5.91076	5.80527	5.84083
1039.63	5.54521	5.40256	6.03361	5.90045	5.71005	4.48472	4.79534	5.35317	5.13782	5.54438	5.05626	2.72196	5.1322	5.1436	4.3408	4.38381	5.28337	5.30402	5.47264	5.31636	4.75567	4.94802	5.3535	5.37544	5.52977	5.23057	5.57612	5.37277	5.53247	5.19407	5.60709	5.71742	5.53359	5.61604	5.52205	5.78394	5.87201	5.84593	6.00484	5.74227	6.07062	6.21785	5.98671	6.27992	5.49923	5.73402	6.11088	6.03271	6.04483
1041.56	5.69615	5.59475	6.22555	6.02205	5.84561	4.60569	4.93034	5.49827	5.2812	5.70115	5.19623	2.80533	5.28208	5.28826	4.43845	4.51449	5.41154	5.46938	5.62798	5.43962	4.86849	5.07419	5.50447	5.48006	5.61119	5.3762	5.73237	5.52651	5.72428	5.34316	5.764	5.87233	5.68557	5.76821	5.63454	5.93621	6.01925	6.01065	6.12758	5.90975	6.19477	6.39444	6.13552	6.45211	5.635	5.91529	6.27989	6.1911	6.23452
1043.49	5.88856	5.80357	6.44924	6.2465	6.0312	4.75868	5.09618	5.68866	5.46256	5.89525	5.36991	2.91424	5.46098	5.47441	4.58068	4.65746	5.5884	5.67249	5.8223	5.62178	5.0159	5.24644	5.68103	5.66789	5.79877	5.55531	5.92571	5.70543	5.80611	5.52117	5.96826	6.03092	5.84797	5.94289	5.81007	6.1224	6.20339	6.21277	6.28672	6.12006	6.36111	6.59114	6.33026	6.65933	5.80419	6.08697	6.48365	6.35971	6.42229
1045.42	6.03932	5.95263	6.61887	6.42946	6.20615	4.87437	5.22823	5.84007	5.6034	6.05482	5.50842	2.99722	5.599	5.62118	4.70469	4.7705	5.73888	5.82065	5.97441	5.79528	5.17619	5.41548	5.82612	5.79429	6.05021	5.70479	6.06606	5.85797	5.90877	5.65194	6.12783	6.17654	5.98995	6.11721	6.00325	6.2811	6.37085	6.37189	6.43881	6.2731	6.54401	6.77105	6.50776	6.84066	5.95447	6.24408	6.65898	6.53064	6.57009
1047.35	6.22706	6.1085	6.8034	6.60211	6.3914	5.03183	5.39451	6.02079	5.77807	6.23653	5.67916	3.09913	5.77623	5.8049	4.86638	4.93841	5.92225	5.9834	6.15577	6.00342	5.35733	5.58424	6.00485	5.93711	6.17985	5.88504	6.24335	6.04132	6.17387	5.82674	6.31075	6.38641	6.17382	6.3291	6.173	6.47002	6.56935	6.57067	6.63403	6.45398	6.77921	6.97932	6.70395	7.04713	6.15702	6.45207	6.86622	6.75892	6.75957
1049.28	6.37831	6.25466	6.96331	6.73362	6.52365	5.16724	5.54273	6.1635	5.91839	6.38483	5.82175	3.18053	5.92397	5.95098	4.99632	5.07282	6.07456	6.13574	6.30601	6.14758	5.48157	5.69491	6.16352	6.14102	6.33114	6.03155	6.41745	6.20696	6.385	5.95919	6.46701	6.55673	6.33018	6.46848	6.29472	6.63869	6.72788	6.73193	6.85104	6.63014	6.95359	7.15159	6.85913	7.22687	6.31611	6.61454	7.02785	6.91162	6.95607
1051.2	6.56377	6.40125	7.16349	6.95382	6.72738	5.32401	5.71135	6.3494	6.08874	6.57585	5.99697	3.28536	6.09624	6.12426	5.1456	5.22684	6.26673	6.33599	6.49188	6.31188	5.63384	5.85213	6.35498	6.34715	6.57352	6.21014	6.62192	6.39574	6.54759	6.14368	6.64162	6.74169	6.51949	6.61008	6.48032	6.82922	6.91303	6.92104	7.04876	6.83251	7.14708	7.34854	7.06493	7.44082	6.49503	6.80599	7.22674	7.10412	7.16925
1053.13	6.70789	6.53383	7.32472	7.08904	6.91325	5.43923	5.84343	6.5025	6.24279	6.72953	6.13798	3.3673	6.23938	6.27493	5.26806	5.34912	6.42406	6.48495	6.64616	6.46678	5.77549	6.00844	6.52081	6.46876	6.69605	6.35118	6.77025	6.53274	6.69794	6.30332	6.81145	6.89281	6.68138	6.79178	6.64365	6.9983	7.09463	7.09834	7.1782	7.00139	7.29703	7.50375	7.23136	7.60671	6.63687	6.94634	7.39471	7.27188	7.34024
1055.06	6.89168	6.75626	7.52682	7.25052	7.11593	5.59329	6.0094	6.68985	6.41364	6.91312	6.31174	3.46457	6.41099	6.44818	5.40806	5.48712	6.59735	6.65681	6.82744	6.66223	5.9238	6.15357	6.70489	6.64689	6.89135	6.52729	6.96002	6.69884	6.90287	6.48643	7.00313	7.07297	6.84692	6.98774	6.81521	7.18943	7.31062	7.29429	7.36959	7.19855	7.49275	7.71114	7.43827	7.8125	6.81449	7.14415	7.58089	7.47763	7.53073
1056.99	7.05565	6.93656	7.70155	7.46389	7.26038	5.7276	6.14991	6.84699	6.55474	7.06684	6.45798	3.54828	6.5583	6.59343	5.53741	5.60435	6.7261	6.80399	6.97721	6.81354	6.05629	6.28583	6.84427	6.79778	7.04591	6.69449	7.11822	6.85887	7.00261	6.63049	7.15837	7.23735	7.00258	7.14503	6.96748	7.34954	7.47062	7.46144	7.551	7.37111	7.65673	7.88161	7.61415	8.00148	6.97253	7.30475	7.74435	7.66056	7.68655
1058.92	7.26152	7.14091	7.9054	7.65499	7.43739	5.87229	6.314	7.02647	6.72485	7.24902	6.62738	3.65313	6.7369	6.76728	5.6876	5.77991	6.92328	6.99626	7.16708	6.98788	6.20282	6.44959	7.01683	6.97636	7.19047	6.87249	7.31923	7.03931	7.16905	6.80339	7.32664	7.41594	7.19342	7.31666	7.16527	7.53425	7.6399	7.65228	7.74598	7.5561	7.85377	8.07124	7.7915	8.18786	7.15914	7.48531	7.94749	7.84322	7.90776
1060.85	7.41832	7.2715	8.07035	7.81916	7.61078	5.99098	6.45334	7.1774	6.87362	7.40212	6.76757	3.73028	6.88234	6.91038	5.81433	5.93632	7.08888	7.15427	7.33437	7.11971	6.33082	6.59696	7.18227	7.13963	7.33779	7.01599	7.47325	7.19846	7.38178	6.96386	7.4715	7.58386	7.34383	7.48717	7.32818	7.69655	7.81134	7.82145	7.92935	7.72728	8.01148	8.25214	7.94515	8.35628	7.31446	7.64601	8.12822	7.99378	8.08918
1062.78	7.59796	7.4272	8.27276	8.01498	7.81494	6.14049	6.61027	7.35755	7.03954	7.5884	6.93332	3.82511	7.04845	7.08483	5.97009	6.08348	7.26989	7.3253	7.51474	7.28316	6.50566	6.76744	7.35958	7.319	7.49552	7.19786	7.63081	7.38084	7.55063	7.13793	7.64647	7.77675	7.50683	7.67843	7.48106	7.87874	7.99594	8.00776	8.16568	7.9057	8.1992	8.46043	8.14396	8.57153	7.48683	7.82775	8.33429	8.20958	8.27595
1064.71	7.73919	7.57536	8.45115	8.16107	7.96659	6.2678	6.74913	7.50543	7.1727	7.74674	7.07569	3.91115	7.19881	7.23328	6.08623	6.18402	7.41383	7.46865	7.66411	7.44215	6.65351	6.9087	7.51657	7.47332	7.64271	7.34897	7.76222	7.52313	7.65223	7.27725	7.80681	7.94549	7.68072	7.84863	7.6173	8.04845	8.14485	8.16921	8.29655	8.06278	8.3623	8.61789	8.31089	8.73635	7.63345	7.98577	8.50522	8.39052	8.42897
1066.64	7.91772	7.74891	8.64527	8.34113	8.12935	6.41978	6.91524	7.67966	7.34039	7.92419	7.25008	4.01338	7.37367	7.40346	6.2362	6.32727	7.58207	7.63442	7.83248	7.63148	6.81107	7.09897	7.69228	7.61727	7.81715	7.51508	7.95073	7.7042	7.82417	7.45674	7.99669	8.13106	7.87528	8.01358	7.81034	8.23175	8.35615	8.3603	8.43653	8.26775	8.55656	8.82592	8.50618	8.93712	7.81087	8.17923	8.69602	8.5877	8.61301
1068.56	8.07662	7.91193	8.8037	8.54079	8.27956	6.54501	7.05063	7.8265	7.48524	8.07627	7.38972	4.10032	7.52499	7.55282	6.36865	6.46174	7.73777	7.79382	7.98	7.78398	6.93112	7.24949	7.83897	7.76724	8.01442	7.65958	8.11197	7.86914	8.03186	7.61202	8.15416	8.29848	8.01976	8.15682	7.96933	8.38826	8.54813	8.53599	8.5838	8.43719	8.72263	9.00295	8.67002	9.12071	7.95962	8.31991	8.85732	8.75113	8.7847
1070.49	8.25714	8.10396	8.99659	8.73633	8.47629	6.68985	7.20839	8.00459	7.64662	8.26021	7.54526	4.19797	7.69425	7.72229	6.52712	6.61234	7.92104	7.98309	8.16222	7.94461	7.0675	7.37429	8.01175	7.94006	8.19601	7.83704	8.28852	8.04669	8.22589	7.76751	8.32431	8.46445	8.16004	8.35681	8.12538	8.57073	8.71505	8.7254	8.76138	8.59961	8.9206	9.20071	8.85603	9.30681	8.14375	8.50235	9.0385	8.92514	8.97904
1072.42	8.41081	8.24897	9.16206	8.83453	8.62352	6.81879	7.34822	8.16147	7.78338	8.41474	7.68354	4.27445	7.8334	7.86684	6.64879	6.74195	8.06664	8.12795	8.31852	8.09207	7.20973	7.51572	8.15408	8.07106	8.34239	7.97671	8.43591	8.19353	8.3532	7.90286	8.47537	8.60361	8.32375	8.5138	8.28167	8.73489	8.86457	8.87881	8.95003	8.74576	9.10064	9.36831	9.02372	9.45922	8.2973	8.67041	9.20066	9.08728	9.14852
1074.35	8.58817	8.40503	9.34712	9.04049	8.79042	6.96211	7.50341	8.33964	7.9428	8.58829	7.84403	4.37384	7.9984	8.03224	6.78104	6.88474	8.22506	8.29021	8.49749	8.27387	7.37914	7.67145	8.31572	8.25242	8.56064	8.1378	8.62834	8.36017	8.52512	8.08127	8.64514	8.77	8.52609	8.66856	8.47058	8.91877	9.04325	9.051	9.13595	8.92253	9.28042	9.54395	9.21654	9.66492	8.47115	8.8477	9.39772	9.2811	9.34329
1076.28	8.74466	8.53136	9.51236	9.19912	8.94743	7.07775	7.6372	8.48519	8.07413	8.73088	7.98816	4.45876	8.14185	8.17446	6.89148	7.00465	8.38333	8.4356	8.65555	8.42997	7.50554	7.79786	8.46125	8.42127	8.68694	8.2928	8.81635	8.50259	8.71535	8.22372	8.79534	8.92896	8.68609	8.82004	8.6273	9.07759	9.19972	9.21155	9.30181	9.09047	9.41983	9.70724	9.37066	9.82448	8.6181	8.99998	9.57067	9.4344	9.51206
1078.21	8.92221	8.69133	9.69577	9.35179	9.12955	7.21742	7.79746	8.64857	8.23955	8.90274	8.14688	4.55657	8.30622	8.33935	7.03571	7.14731	8.55853	8.61375	8.83045	8.60193	7.65024	7.96295	8.6099	8.57733	8.82582	8.46039	8.98628	8.67247	8.88507	8.38523	8.9563	9.0956	8.85583	9.01208	8.79018	9.25319	9.36873	9.38994	9.51029	9.26514	9.60089	9.88771	9.54789	9.99226	8.78999	9.16437	9.77036	9.61338	9.70887
1080.14	9.07086	8.83054	9.85059	9.5172	9.27998	7.33819	7.93277	8.7896	8.37605	9.05724	8.27957	4.6373	8.44585	8.48411	7.16045	7.26521	8.697	8.77068	8.98073	8.73853	7.78677	8.0907	8.74205	8.71359	8.99342	8.59767	9.1202	8.82413	8.99997	8.52483	9.11112	9.2452	8.99567	9.16884	8.9341	9.40974	9.51655	9.54154	9.68827	9.41135	9.76928	10.0449	9.7149	10.1592	8.93474	9.30678	9.93439	9.76653	9.84728
1082.07	9.24204	9.03203	10.0337	9.70116	9.45189	7.47594	8.07321	8.94945	8.52162	9.22839	8.43079	4.73156	8.60355	8.64966	7.30255	7.40198	8.85493	8.92645	9.14774	8.88501	7.93882	8.23213	8.90402	8.8594	9.12514	8.75383	9.28738	8.99082	9.18521	8.6753	9.27548	9.40287	9.14677	9.32007	9.0966	9.57772	9.6966	9.7302	9.86075	9.58676	9.95396	10.2312	9.90161	10.3396	9.0916	9.47991	10.1036	9.95509	10.0323
1083.99	9.38098	9.22315	10.1932	9.82682	9.59292	7.59731	8.19743	9.09287	8.65364	9.37349	8.56129	4.80785	8.73766	8.7783	7.41122	7.52459	8.99246	9.05598	9.28158	9.01502	8.06419	8.36557	9.06408	8.99883	9.2631	8.89499	9.43113	9.12645	9.31981	8.81445	9.4198	9.5451	9.27685	9.47258	9.24279	9.7203	9.85854	9.88187	9.99976	9.73752	10.1021	10.3917	10.0506	10.4867	9.23258	9.63147	10.2615	10.1277	10.1917
1085.92	9.55257	9.37083	10.3738	10.0204	9.7575	7.73632	8.34441	9.25443	8.80903	9.54087	8.71227	4.89101	8.89727	8.9291	7.5555	7.67272	9.15965	9.22174	9.44899	9.18324	8.19686	8.51655	9.23408	9.16651	9.4396	9.04829	9.60392	9.28844	9.41389	8.97991	9.58268	9.72096	9.43941	9.64381	9.39585	9.89135	10.029	10.045	10.182	9.89651	10.2728	10.5649	10.2162	10.6784	9.39571	9.80256	10.442	10.2962	10.3774
1087.85	9.69525	9.46947	10.5353	10.1989	9.91258	7.84124	8.46901	9.39034	8.93819	9.68337	8.84131	4.96374	9.02962	9.06966	7.67822	7.79424	9.2938	9.36964	9.59485	9.32842	8.31349	8.64647	9.35061	9.30585	9.58527	9.18388	9.73677	9.42878	9.55543	9.1112	9.72152	9.86868	9.60351	9.78414	9.54085	10.047	10.1742	10.1995	10.3314	10.0493	10.4238	10.7263	10.3678	10.8355	9.53519	9.94633	10.5977	10.4361	10.5434
1089.78	9.86373	9.62153	10.711	10.3113	10.0715	7.96645	8.60543	9.55151	9.08493	9.84472	8.99531	5.05178	9.18333	9.22405	7.80235	7.924	9.44774	9.52763	9.74863	9.49421	8.44521	8.77923	9.49077	9.45753	9.74235	9.35412	9.88533	9.57479	9.78959	9.26443	9.88359	10.0174	9.76429	9.94681	9.70979	10.218	10.3349	10.3682	10.4955	10.2206	10.5954	10.9094	10.5402	10.9991	9.69574	10.1133	10.7735	10.6148	10.7024
1091.71	10.006	9.76028	10.843	10.4348	10.194	8.08417	8.72482	9.68535	9.21728	9.97814	9.12554	5.12495	9.32084	9.3511	7.91209	8.04069	9.57254	9.64907	9.88518	9.62538	8.57297	8.89658	9.64007	9.59294	9.88556	9.49506	10.0343	9.70967	9.94327	9.4079	10.0311	10.1596	9.90184	10.0957	9.82874	10.3672	10.4858	10.5124	10.6501	10.3571	10.7451	11.0607	10.691	11.1595	9.83144	10.2666	10.9264	10.7665	10.8421
1093.64	10.1644	9.92998	10.9971	10.6372	10.351	8.2161	8.87817	9.83647	9.36433	10.1276	9.26579	5.21405	9.47192	9.50171	8.0434	8.17266	9.7307	9.7992	10.0476	9.77024	8.71716	9.02625	9.79261	9.73035	10.0681	9.64359	10.2119	9.87706	10.0432	9.5648	10.1808	10.3176	10.0509	10.2462	9.97144	10.5206	10.6506	10.6762	10.8035	10.5148	10.9044	11.2126	10.8605	11.3255	9.98481	10.4158	11.1	10.9388	11.0112
1095.57	10.2946	10.0713	11.1506	10.7682	10.4902	8.32001	9.0017	9.97139	9.487	10.2639	9.38912	5.28943	9.59907	9.63411	8.15664	8.27724	9.87144	9.9359	10.1776	9.89956	8.82486	9.1485	9.9173	9.85555	10.1992	9.77359	10.3508	10.0146	10.204	9.68832	10.3258	10.4649	10.1777	10.3798	10.1235	10.6603	10.792	10.8335	10.9453	10.644	11.0374	11.3552	11.0109	11.4576	10.1194	10.5465	11.2456	11.0881	11.1676
1097.5	10.4528	10.2242	11.3363	10.9237	10.6523	8.44912	9.12554	10.1219	9.62867	10.4221	9.52738	5.37272	9.74092	9.78075	8.29668	8.39672	10.0176	10.0903	10.3232	10.0613	8.94783	9.29387	10.0583	10.0055	10.3522	9.9147	10.4953	10.1657	10.4338	9.83218	10.4821	10.6269	10.3333	10.5395	10.2714	10.8187	10.9512	10.9934	11.1031	10.7953	11.2005	11.5281	11.1777	11.621	10.2761	10.7032	11.406	11.2418	11.3361
1099.43	10.595	10.3615	11.4929	11.0592	10.7861	8.56475	9.23955	10.2466	9.74878	10.5523	9.64797	5.44403	9.86787	9.90438	8.40297	8.50391	10.1412	10.2195	10.4537	10.2019	9.08011	9.40787	10.1899	10.1391	10.4676	10.0447	10.6288	10.2984	10.5371	9.96562	10.6127	10.7596	10.4744	10.6946	10.3925	10.9582	11.1086	11.1287	11.2573	10.9434	11.3509	11.6778	11.3154	11.7674	10.409	10.8427	11.555	11.3772	11.4788
1101.35	10.7569	10.4879	11.6533	11.2001	10.9282	8.68271	9.3783	10.3896	9.88672	10.7004	9.78872	5.52266	10.0145	10.0515	8.50936	8.63179	10.2943	10.3646	10.6019	10.3501	9.20741	9.54391	10.3366	10.295	10.5926	10.1868	10.7877	10.4558	10.6218	10.1071	10.7668	10.9046	10.6186	10.8407	10.5363	11.1133	11.2764	11.2809	11.4242	11.0938	11.5116	11.8566	11.4643	11.9142	10.5545	10.9992	11.7149	11.552	11.6392
1103.28	10.8887	10.6102	11.781	11.3234	11.0593	8.77693	9.49283	10.5235	10.0051	10.8282	9.90766	5.59356	10.1394	10.182	8.60861	8.74072	10.4265	10.4937	10.7323	10.466	9.29791	9.67205	10.459	10.4132	10.735	10.3141	10.9269	10.5917	10.787	10.2267	10.9056	11.0506	10.7373	10.9544	10.6815	11.2463	11.4077	11.4258	11.5778	11.2267	11.659	11.9978	11.5999	12.0555	10.6797	11.119	11.8481	11.6908	11.7898
1105.21	11.032	10.745	11.935	11.5044	11.2206	8.89727	9.61764	10.6754	10.1376	10.977	10.0383	5.67821	10.2835	10.3206	8.73858	8.86386	10.5625	10.6406	10.8868	10.6072	9.4134	9.80047	10.6013	10.5522	10.8773	10.4577	11.0708	10.7314	10.9543	10.3703	11.0521	11.2088	10.8861	11.1036	10.8349	11.3976	11.5682	11.58	11.7332	11.3688	11.8184	12.1367	11.7586	12.2356	10.8213	11.2671	12.0101	11.8467	11.9562
1107.14	11.1556	10.8702	12.083	11.644	11.3613	9.00226	9.72517	10.7989	10.2503	11.1116	10.1529	5.74237	10.4081	10.436	8.85144	8.97533	10.6896	10.7676	11.0139	10.7382	9.52786	9.91784	10.7196	10.689	10.9953	10.5787	11.1803	10.847	11.0262	10.4992	11.1759	11.3335	11.0199	11.251	10.9539	11.5349	11.6957	11.709	11.8529	11.5066	11.9389	12.2703	11.8929	12.3506	10.9438	11.4096	12.1509	11.9919	12.094
1109.07	11.298	11.0324	12.2352	11.767	11.4981	9.11885	9.84974	10.9414	10.3819	11.2605	10.2843	5.81616	10.5463	10.5773	8.97542	9.08766	10.8432	10.915	11.1622	10.8879	9.65838	10.039	10.8443	10.811	11.1461	10.7219	11.3334	10.9895	11.1926	10.6352	11.3151	11.4816	11.1512	11.3841	11.0982	11.6827	11.8298	11.8664	11.9995	11.6673	12.0866	12.4335	12.0428	12.5002	11.0902	11.5561	12.3082	12.1469	12.2508
1111	11.4256	11.1649	12.3592	11.9092	11.6155	9.21946	9.95867	11.0632	10.4961	11.3824	10.3961	5.88055	10.6625	10.6984	9.07407	9.18963	10.9665	11.0302	11.2988	11.0087	9.77411	10.1478	10.9706	10.9172	11.2631	10.8402	11.4783	11.1103	11.3711	10.7537	11.4406	11.6012	11.2775	11.4941	11.224	11.8123	11.9605	12.0025	12.1182	11.7974	12.2341	12.5715	12.1734	12.647	11.2179	11.6824	12.4457	12.2822	12.3772
1112.93	11.5738	11.2964	12.5152	12.0531	11.7649	9.33644	10.0841	11.1997	10.6242	11.5148	10.5222	5.95709	10.7931	10.8387	9.19009	9.31235	11.1002	11.1629	11.4374	11.1363	9.89483	10.2738	11.112	11.0631	11.3935	10.9712	11.6219	11.2472	11.4711	10.8846	11.5701	11.7394	11.4211	11.6394	11.3508	11.9538	12.1079	12.1513	12.2682	11.9326	12.3794	12.7273	12.3252	12.7859	11.3559	11.8212	12.5947	12.4366	12.524
1114.86	11.6876	11.3833	12.652	12.1633	11.885	9.43439	10.1903	11.3133	10.7332	11.6325	10.6345	6.02344	10.9125	10.9548	9.29821	9.40607	11.2156	11.2873	11.5622	11.2427	9.98899	10.3687	11.2326	11.1953	11.5333	11.0839	11.7337	11.3676	11.5542	11.0044	11.6936	11.86	11.5479	11.7809	11.4722	12.0754	12.2542	12.2782	12.4061	12.0612	12.5011	12.8445	12.4515	12.9097	11.4758	11.9439	12.7309	12.5607	12.6549
1116.78	11.8236	11.4974	12.7927	12.3049	12.023	9.54525	10.312	11.4483	10.8602	11.7693	10.7604	6.09426	11.0441	11.0786	9.41725	9.51354	11.3438	11.4243	11.7022	11.3762	10.0969	10.4858	11.3649	11.3156	11.6857	11.2141	11.8604	11.5028	11.7146	11.1369	11.8322	11.9829	11.6824	11.9056	11.6092	12.2231	12.3978	12.4245	12.5527	12.2	12.6369	12.9953	12.5905	13.0618	11.6079	12.0892	12.8776	12.7059	12.8113
1118.71	11.9617	11.6328	12.9145	12.4275	12.1418	9.64104	10.4189	11.5653	10.9701	11.8843	10.8679	6.15727	11.1508	11.1946	9.50932	9.60625	11.4594	11.5343	11.8128	11.5041	10.2076	10.5958	11.4791	11.4254	11.791	11.3328	11.9803	11.6277	11.861	11.2527	11.9472	12.106	11.7998	12.0103	11.7344	12.3527	12.513	12.5485	12.6749	12.3233	12.7529	13.1283	12.7245	13.1844	11.7207	12.2047	13.0083	12.8418	12.95
1120.64	12.0956	11.7694	13.0637	12.5475	12.2777	9.75097	10.5347	11.6926	11.0893	12.0159	10.9827	6.2298	11.2741	11.3199	9.61175	9.71664	11.5939	11.6492	11.9451	11.646	10.3484	10.7164	11.5917	11.5486	11.9175	11.4621	12.1266	11.7626	11.983	11.3728	12.0742	12.2421	11.9404	12.1551	11.8625	12.4823	12.6456	12.6831	12.7913	12.4583	12.8993	13.2593	12.8684	13.3202	11.8451	12.3415	13.1555	12.9813	13.0959
1122.57	12.19	11.8918	13.1874	12.6655	12.3971	9.845	10.6345	11.8012	11.1918	12.1329	11.0806	6.28776	11.3845	11.4266	9.69755	9.81441	11.7087	11.7606	12.0696	11.7526	10.4443	10.8288	11.7055	11.6452	12.0468	11.5751	12.2414	11.8673	12.0988	11.4876	12.1907	12.347	12.0555	12.2859	11.9676	12.5992	12.7848	12.8008	12.9184	12.5762	13.0352	13.3908	12.9841	13.4533	11.9591	12.458	13.2827	13.0989	13.2181
1124.5	12.3084	12.0048	13.3173	12.8162	12.52	9.9504	10.7486	11.9274	11.3077	12.2639	11.1958	6.3541	11.5091	11.5478	9.79616	9.92352	11.8234	11.8958	12.1974	11.8646	10.5351	10.9345	11.8384	11.7691	12.1375	11.6989	12.3606	11.9811	12.2306	11.5975	12.3177	12.4536	12.1617	12.4052	12.0913	12.7241	12.9244	12.9386	13.0681	12.7135	13.1675	13.5365	13.1182	13.5816	12.0876	12.5877	13.4198	13.2296	13.3628
1126.43	12.4229	12.1014	13.4387	12.9046	12.6218	10.0355	10.8406	12.0358	11.4056	12.375	11.2984	6.41157	11.6176	11.6534	9.89086	10.0117	11.942	12.009	12.2995	11.9719	10.6195	11.0222	11.938	11.8958	12.2425	11.7993	12.4676	12.0883	12.3276	11.7043	12.4288	12.5673	12.2719	12.5011	12.1992	12.8401	13.0332	13.0606	13.2081	12.8255	13.2827	13.6614	13.2434	13.6876	12.1904	12.7051	13.5441	13.3458	13.4778
1128.36	12.5495	12.2334	13.5771	13.0197	12.7476	10.1338	10.9492	12.1562	11.5141	12.4941	11.4134	6.47913	11.735	11.7625	10.005	10.113	12.0756	12.1248	12.4247	12.1048	10.7225	11.1297	12.0451	12.0157	12.3679	11.9083	12.5914	12.2176	12.436	11.8276	12.5503	12.6893	12.4044	12.6372	12.3124	12.9739	13.1645	13.1765	13.3291	12.9524	13.413	13.7938	13.3795	13.8256	12.3048	12.8295	13.6796	13.4798	13.6015
1130.29	12.6601	12.3196	13.686	13.1416	12.8612	10.2214	11.0465	12.2627	11.6111	12.5946	11.5096	6.53188	11.8294	11.8576	10.0918	10.2028	12.1791	12.2205	12.5284	12.2197	10.8271	11.2305	12.1514	12.1089	12.4494	12.0035	12.702	12.3245	12.541	11.9286	12.6601	12.8139	12.5122	12.7607	12.4253	13.0887	13.2743	13.2889	13.425	13.0794	13.5083	13.8975	13.4872	13.9295	12.4093	12.9353	13.7948	13.5879	13.7114
1132.21	12.7828	12.4277	13.8031	13.258	12.9849	10.316	11.1495	12.3793	11.7258	12.7148	11.6119	6.59027	11.9406	11.9798	10.1686	10.3016	12.2847	12.3391	12.6471	12.3344	10.928	11.3381	12.2609	12.2203	12.5861	12.1184	12.8259	12.4349	12.647	12.0486	12.7683	12.9427	12.6219	12.8627	12.5449	13.2141	13.3854	13.4145	13.5584	13.1974	13.6303	14.021	13.6128	14.0526	12.531	13.0604	13.9178	13.7118	13.8479
1134.14	12.8848	12.538	13.9149	13.3615	13.0821	10.3937	11.2356	12.4766	11.8154	12.82	11.7039	6.63945	12.0417	12.0808	10.2478	10.3788	12.3812	12.4461	12.7411	12.4251	10.9955	11.4183	12.3497	12.3187	12.6942	12.2179	12.9268	12.53	12.7496	12.1485	12.8686	13.0432	12.7129	12.9561	12.6451	13.3216	13.4974	13.5238	13.6634	13.2936	13.748	14.1323	13.7269	14.1764	12.629	13.166	14.0239	13.829	13.9626
1136.07	13.0032	12.6557	14.0398	13.4761	13.1929	10.4881	11.333	12.5825	11.9108	12.9322	11.8081	6.69865	12.1498	12.1839	10.3463	10.4645	12.4908	12.5528	12.8515	12.5254	11.0819	11.5072	12.4648	12.4163	12.8006	12.3287	13.0378	12.6445	12.8677	12.2542	12.983	13.1518	12.8198	13.0832	12.7587	13.4276	13.623	13.6448	13.773	13.4146	13.8599	14.2436	13.8475	14.2947	12.7311	13.2782	14.1472	13.9473	14.0789
1138	13.102	12.7523	14.1411	13.5726	13.2901	10.5691	11.4129	12.6766	11.9962	13.0276	11.8875	6.74507	12.2384	12.2763	10.4271	10.5403	12.5727	12.6352	12.9571	12.6184	11.1742	11.5932	12.5646	12.5108	12.8976	12.4217	13.1341	12.7472	12.967	12.3428	13.0759	13.2412	12.9137	13.188	12.8546	13.5211	13.7193	13.7425	13.861	13.5204	13.9617	14.3563	13.9465	14.3916	12.8223	13.3745	14.2513	14.0481	14.1833
1139.93	13.2154	12.8474	14.2545	13.6602	13.3963	10.6623	11.5121	12.78	12.0929	13.1398	11.9835	6.80036	12.3406	12.3821	10.5143	10.6336	12.6804	12.7406	13.0714	12.7295	11.268	11.688	12.6538	12.6213	13.0029	12.5192	13.2368	12.8547	13.1009	12.4379	13.1854	13.3381	13.0195	13.284	12.9577	13.6321	13.8313	13.8544	13.9712	13.6347	14.0714	14.4836	14.063	14.5142	12.9301	13.4801	14.3742	14.1726	14.3004
1141.86	13.3183	12.9278	14.3537	13.757	13.4835	10.7361	11.5922	12.8686	12.1729	13.2309	12.0669	6.84549	12.4293	12.4685	10.584	10.7092	12.7838	12.8335	13.1548	12.8227	11.3345	11.7782	12.7347	12.6955	13.0814	12.6056	13.3194	12.9342	13.2075	12.5252	13.2754	13.4377	13.1162	13.3704	13.0556	13.7306	13.9341	13.9483	14.085	13.7325	14.1632	14.5771	14.1641	14.61	13.0156	13.5695	14.474	14.2674	14.4064
1143.79	13.4222	13.0229	14.4715	13.8638	13.5851	10.8142	11.6734	12.9752	12.2651	13.3325	12.1579	6.89838	12.527	12.5634	10.672	10.7876	12.8856	12.9352	13.2469	12.9236	11.4154	11.8718	12.831	12.7788	13.1606	12.7028	13.4191	13.0323	13.2769	12.6292	13.3705	13.5538	13.2197	13.4815	13.1552	13.8347	14.0398	14.0585	14.2011	13.8272	14.2777	14.6793	14.2653	14.7113	13.1118	13.6747	14.586	14.379	14.5209
1145.72	13.5047	13.1116	14.5683	13.9531	13.6795	10.8809	11.7427	13.0611	12.3425	13.4199	12.2318	6.94419	12.6048	12.6442	10.7499	10.8543	12.9571	13.0142	13.3317	13.0023	11.498	11.9432	12.9114	12.8625	13.243	12.7834	13.5133	13.1152	13.3703	12.7157	13.4609	13.646	13.3063	13.5657	13.236	13.9235	14.131	14.1513	14.3008	13.9125	14.3679	14.7672	14.3504	14.8096	13.196	13.7631	14.6829	14.4754	14.6122
1147.65	13.6093	13.2182	14.6711	14.0679	13.778	10.9639	11.8274	13.1502	12.4263	13.5174	12.3241	6.99451	12.6964	12.7351	10.8226	10.9391	13.0366	13.1029	13.4348	13.0958	11.5685	12.0135	13.0079	12.9525	13.3375	12.8763	13.6279	13.2105	13.5062	12.8131	13.551	13.7365	13.3949	13.6453	13.3298	14.0239	14.2265	14.2549	14.4022	14.0183	14.4619	14.8811	14.4592	14.9217	13.2938	13.8551	14.7866	14.5789	14.7066
1149.57	13.6958	13.2854	14.7626	14.1494	13.8629	11.0315	11.8994	13.2288	12.4983	13.5969	12.4024	7.03319	12.776	12.8116	10.8833	11.0118	13.1122	13.1822	13.5145	13.1813	11.6318	12.076	13.093	13.0326	13.4141	12.9568	13.7081	13.2973	13.5671	12.8951	13.628	13.8112	13.4714	13.7397	13.4037	14.1096	14.3113	14.3467	14.495	14.103	14.5487	14.9657	14.5497	14.9943	13.3701	13.9418	14.8775	14.6659	14.7984
1151.5	13.7827	13.3687	14.8685	14.2302	13.954	11.1046	11.98	13.3258	12.5856	13.689	12.4819	7.07932	12.8628	12.9005	10.9583	11.0908	13.215	13.2804	13.6109	13.2764	11.723	12.1653	13.1802	13.1403	13.514	13.053	13.8031	13.3931	13.6503	12.9809	13.7188	13.8966	13.5665	13.8439	13.4993	14.2025	14.4042	14.441	14.5979	14.1932	14.6526	15.0639	14.6455	15.0936	13.4585	14.0421	14.9756	14.7688	14.9088
1153.43	13.8586	13.4516	14.9529	14.2954	14.0228	11.1626	12.0447	13.4051	12.6538	13.7635	12.5508	7.11516	12.9374	12.9751	11.0204	11.1502	13.2984	13.3588	13.6934	13.3482	11.7878	12.2404	13.2473	13.221	13.6006	13.1306	13.8848	13.468	13.7365	13.0492	13.7938	13.9771	13.6558	13.9157	13.583	14.2849	14.4931	14.521	14.6797	14.2696	14.7312	15.1553	14.7197	15.1876	13.5374	14.1197	15.0619	14.8486	14.9917
1155.36	13.9465	13.5391	15.0476	14.3985	14.1167	11.2336	12.1222	13.4926	12.7347	13.8517	12.6326	7.16097	13.0223	13.0565	11.0916	11.217	13.3887	13.4397	13.7848	13.4291	11.8462	12.3101	13.32	13.2905	13.6865	13.2137	13.9686	13.5565	13.7907	13.1261	13.8849	14.0753	13.7419	13.9989	13.6613	14.3758	14.6024	14.6162	14.7643	14.36	14.8143	15.2443	14.808	15.2754	13.6239	14.2039	15.1627	14.9493	15.0872
1157.29	14.0149	13.6102	15.1287	14.4838	14.2029	11.2932	12.1887	13.5588	12.8035	13.9247	12.6966	7.19682	13.0887	13.1284	11.1546	11.2744	13.4676	13.507	13.8653	13.4968	11.908	12.3729	13.393	13.3466	13.7607	13.277	14.0321	13.6269	13.8274	13.2001	13.9587	14.1483	13.8108	14.0753	13.7343	14.4536	14.6859	14.6983	14.8376	14.4407	14.8912	15.3146	14.8915	15.3608	13.6923	14.2808	15.2435	15.0298	15.1571
1159.22	14.1028	13.6847	15.2135	14.5632	14.2841	11.3621	12.2662	13.6402	12.8783	14.0068	12.7684	7.24087	13.168	13.2098	11.2276	11.3496	13.5449	13.5911	13.9518	13.5795	11.9913	12.4422	13.4806	13.4207	13.8397	13.3523	14.1113	13.7107	13.9437	13.2908	14.0297	14.2208	13.8912	14.1626	13.8187	14.5417	14.7682	14.7912	14.9331	14.543	14.9792	15.4108	14.9872	15.4572	13.7744	14.3668	15.3374	15.1114	15.2469
1161.15	14.1793	13.7504	15.2907	14.6309	14.3379	11.4166	12.3289	13.7106	12.9351	14.0761	12.8307	7.2715	13.2361	13.2755	11.2865	11.4094	13.6097	13.6622	14.0225	13.6557	12.0483	12.5079	13.5376	13.4866	13.9077	13.4177	14.1879	13.7774	14.0542	13.3573	14.0976	14.2808	13.9524	14.2254	13.8819	14.6173	14.8396	14.8723	15.0147	14.6241	15.0502	15.4925	15.0568	15.5218	13.8421	14.4364	15.4157	15.1892	15.3225
1163.08	14.2622	13.835	15.3798	14.6985	14.4246	11.4786	12.3973	13.7883	13.0028	14.1567	12.904	7.30902	13.3132	13.3508	11.3513	11.4727	13.6857	13.7361	14.105	13.7356	12.1018	12.5852	13.5996	13.567	13.9882	13.4929	14.2778	13.8511	14.1028	13.4319	14.1784	14.3523	14.0282	14.302	13.9556	14.703	14.9092	14.9506	15.0943	14.6931	15.1363	15.5846	15.1375	15.6093	13.9192	14.52	15.4993	15.2818	15.41
1165	14.3272	13.8988	15.4461	14.7611	14.5011	11.5308	12.4508	13.8537	13.0605	14.2228	12.9619	7.33682	13.3758	13.415	11.4014	11.5244	13.7484	13.7947	14.1679	13.7908	12.1574	12.6426	13.67	13.6462	14.057	13.5578	14.3449	13.9144	14.1424	13.4968	14.2462	14.4251	14.0912	14.3749	14.0214	14.7721	14.9771	15.0149	15.1626	14.7548	15.2114	15.6533	15.2082	15.6901	13.9806	14.5885	15.5651	15.3513	15.4946
1166.93	14.4103	13.9782	15.5318	14.8485	14.5734	11.593	12.518	13.931	13.1319	14.2965	13.0312	7.37328	13.4498	13.4877	11.4612	11.5889	13.8238	13.8694	14.2398	13.8599	12.2305	12.7058	13.7562	13.7079	14.115	13.634	14.4148	13.9897	14.257	13.569	14.3213	14.5026	14.1645	14.4515	14.0922	14.848	15.0601	15.0934	15.2649	14.8363	15.2964	15.7327	15.2895	15.7613	14.0543	14.6677	15.6478	15.4333	15.5874
1168.86	14.4748	14.0334	15.6015	14.9113	14.6296	11.6357	12.5715	13.9863	13.1861	14.3605	13.0864	7.40301	13.5073	13.5464	11.5091	11.6428	13.8871	13.9315	14.3048	13.9258	12.2804	12.7507	13.8116	13.7472	14.1742	13.6904	14.4734	14.0545	14.3413	13.6287	14.3858	14.5592	14.2351	14.509	14.1489	14.9136	15.1209	15.1607	15.3387	14.897	15.363	15.8002	15.3576	15.8171	14.1159	14.7287	15.7161	15.4999	15.6567
1170.79	14.5428	14.0923	15.68	14.9851	14.7005	11.6876	12.6274	14.0545	13.2484	14.4343	13.1492	7.44027	13.5756	13.6173	11.5663	11.7021	13.9545	14.0026	14.3765	14.0087	12.326	12.8053	13.8579	13.8159	14.2438	13.7615	14.5576	14.1255	14.3824	13.6956	14.4561	14.6265	14.3017	14.5749	14.2265	14.987	15.1942	15.2372	15.4042	14.9739	15.4306	15.8698	15.4353	15.9039	14.1804	14.8018	15.7974	15.5836	15.739
1172.72	14.6026	14.1565	15.7425	15.0454	14.7673	11.7347	12.6725	14.112	13.3018	14.4873	13.1969	7.46512	13.6312	13.6764	11.6119	11.7452	14.0042	14.0583	14.4332	14.0676	12.3767	12.8558	13.9062	13.87	14.2643	13.8191	14.6257	14.1819	14.4414	13.7492	14.5065	14.6891	14.3626	14.6367	14.2841	15.0478	15.2655	15.2973	15.4641	15.0449	15.4838	15.9316	15.4969	15.9619	14.23	14.8618	15.8656	15.6525	15.8023
1174.65	14.673	14.2178	15.8163	15.1197	14.8454	11.7912	12.7314	14.1765	13.3595	14.553	13.2561	7.49809	13.6975	13.7402	11.6696	11.7942	14.0709	14.1242	14.5055	14.1281	12.4413	12.9132	13.9816	13.9303	14.3372	13.8781	14.6952	14.2532	14.5251	13.8152	14.5722	14.7586	14.4335	14.7079	14.3467	15.1182	15.343	15.3758	15.5187	15.1063	15.5608	16.0066	15.5688	16.0215	14.2988	14.9273	15.944	15.7216	15.8718
1176.58	14.7248	14.2757	15.8826	15.1597	14.8913	11.8302	12.7756	14.2275	13.4056	14.6078	13.3058	7.519	13.7506	13.7921	11.7171	11.838	14.1254	14.1772	14.5615	14.1763	12.4836	12.9586	14.0411	13.9832	14.4076	13.9302	14.7382	14.3067	14.5706	13.8755	14.6349	14.813	14.488	14.749	14.4068	15.1751	15.4005	15.4443	15.5674	15.1574	15.6263	16.0631	15.6281	16.0949	14.3581	14.9817	16.0042	15.7778	15.9343
1178.51	14.7959	14.3372	15.9513	15.2244	14.945	11.8755	12.8274	14.2943	13.4625	14.6701	13.3635	7.54819	13.8139	13.8563	11.7631	11.8934	14.1867	14.2416	14.6229	14.2397	12.5284	13.0065	14.1086	14.0488	14.4613	13.9953	14.7968	14.3675	14.6329	13.9422	14.6928	14.8753	14.5487	14.8183	14.4619	15.238	15.4569	15.5114	15.6377	15.2293	15.6881	16.1398	15.7003	16.1674	14.4233	15.0513	16.0737	15.8462	16.011
1180.44	14.8506	14.376	16.0063	15.2772	14.9985	11.9097	12.8736	14.3479	13.5068	14.7235	13.4088	7.57132	13.8634	13.9044	11.7924	11.9347	14.2401	14.291	14.6735	14.2913	12.5668	13.0462	14.1532	14.1076	14.5291	14.0442	14.8547	14.4218	14.6884	13.988	14.7379	14.9332	14.5959	14.8855	14.5097	15.2927	15.5096	15.5587	15.7052	15.2858	15.7342	16.2004	15.7589	16.2105	14.4724	15.0994	16.1367	15.903	16.0683
1182.36	14.9021	14.4394	16.0765	15.3376	15.0732	11.9575	12.9274	14.4045	13.5633	14.7826	13.462	7.59949	13.9209	13.961	11.8368	11.9895	14.3055	14.3471	14.7368	14.3568	12.6158	13.1021	14.1979	14.1557	14.5944	14.1042	14.9216	14.4831	14.7409	14.0518	14.7905	15.0093	14.6589	14.9474	14.5695	15.3568	15.5769	15.6198	15.772	15.3457	15.7947	16.2676	15.8243	16.2811	14.5311	15.1597	16.2044	15.9725	16.1417
1184.29	14.9513	14.4836	16.1305	15.3934	15.1231	11.9948	12.966	14.4517	13.6032	14.8275	13.5005	7.62124	13.9676	14.0118	11.876	12.0306	14.3551	14.39	14.7862	14.4042	12.649	13.1456	14.24	14.1953	14.6338	14.151	14.9642	14.5257	14.7726	14.0993	14.8362	15.0649	14.7135	14.9831	14.6229	15.4108	15.6327	15.6775	15.82	15.3994	15.8524	16.3184	15.88	16.3346	14.5841	15.2098	16.2612	16.0298	16.1988
1186.22	15.0145	14.5479	16.1941	15.4497	15.1647	12.0349	13.0125	14.5084	13.6529	14.8837	13.5501	7.64869	14.0217	14.0687	11.9341	12.0761	14.4134	14.4434	14.8494	14.458	12.6866	13.1989	14.3	14.2444	14.6913	14.203	15.0227	14.5812	14.8378	14.1525	14.8966	15.1113	14.7675	15.0457	14.6839	15.4682	15.7061	15.7399	15.8768	15.463	15.9174	16.3791	15.9427	16.3843	14.6426	15.2722	16.3333	16.0881	16.265
1188.15	15.0572	14.5911	16.246	15.4902	15.2066	12.0643	13.0478	14.5483	13.6902	14.9286	13.5896	7.66521	14.0634	14.109	11.9686	12.1041	14.4527	14.4893	14.8951	14.4985	12.7343	13.2359	14.3426	14.277	14.7311	14.2454	15.0701	14.6287	14.8976	14.196	14.9346	15.1465	14.8051	15.0974	14.7231	15.5141	15.7591	15.7863	15.9277	15.5176	15.9658	16.4326	15.9891	16.4327	14.6862	15.3224	16.3853	16.1444	16.309
1190.08	15.1147	14.6321	16.3078	15.5392	15.2726	12.1088	13.0947	14.6011	13.735	14.9787	13.6404	7.68865	14.1143	14.1597	12.0071	12.1518	14.5053	14.5493	14.9499	14.5554	12.7821	13.2721	14.3919	14.3342	14.7725	14.3044	15.1312	14.6898	14.9646	14.2503	14.9775	15.197	14.856	15.1437	14.7708	15.5714	15.8118	15.8449	15.9968	15.5815	16.0248	16.4878	16.0479	16.4985	14.7371	15.3788	16.4461	16.2114	16.3665
1192.01	15.1625	14.6713	16.3529	15.5866	15.3205	12.138	13.1312	14.6472	13.7704	15.0179	13.6743	7.70581	14.1536	14.1987	12.037	12.1904	14.542	14.5923	14.9938	14.6	12.8091	13.3081	14.4293	14.3854	14.8022	14.3494	15.1757	14.7318	15.0001	14.2901	15.018	15.2361	14.902	15.1769	14.814	15.6138	15.8499	15.8945	16.05	15.6298	16.0722	16.5259	16.0933	16.5356	14.7752	15.4257	16.4945	16.2504	16.4214
1193.94	15.2187	14.7203	16.4012	15.636	15.3607	12.172	13.1736	14.6988	13.8163	15.0678	13.7174	7.72697	14.204	14.2485	12.0835	12.2299	14.5942	14.6394	15.0482	14.6493	12.8443	13.3498	14.476	14.4333	14.867	14.3951	15.2159	14.7787	15.0449	14.3418	15.0722	15.2837	14.9522	15.2344	14.8634	15.6645	15.8966	15.9486	16.0915	15.683	16.1177	16.5862	16.1453	16.5847	14.8241	15.4788	16.5522	16.3039	16.478
1195.87	15.2581	14.7691	16.4431	15.6758	15.3958	12.1976	13.2012	14.7374	13.8516	15.1089	13.7504	7.74535	14.2432	14.288	12.1176	12.2592	14.6372	14.6757	15.0856	14.6838	12.8748	13.3812	14.5113	14.4731	14.8953	14.4295	15.2462	14.8201	15.0712	14.3773	15.1122	15.3218	14.993	15.2863	14.9028	15.7089	15.9403	15.9933	16.1318	15.7208	16.1514	16.6293	16.1922	16.6344	14.8657	15.5165	16.5961	16.3551	16.5276
1197.79	15.3077	14.8153	16.507	15.7286	15.4483	12.2356	13.2428	14.7839	13.8942	15.16	13.7928	7.76679	14.2869	14.3288	12.1535	12.2934	14.6849	14.7239	15.1282	14.7272	12.9164	13.4264	14.5505	14.5163	14.9205	14.4725	15.2992	14.8662	15.1169	14.4252	15.1618	15.3659	15.0488	15.3327	14.9598	15.7592	15.9939	16.0497	16.1998	15.7804	16.2115	16.6834	16.2452	16.6761	14.9157	15.5631	16.6488	16.4072	16.581
1199.72	15.3431	14.8409	16.5475	15.7577	15.4839	12.2594	13.2731	14.8168	13.9225	15.1999	13.8255	7.77673	14.3211	14.3601	12.1763	12.326	14.7209	14.7613	15.1628	14.7676	12.9497	13.4574	14.5857	14.5431	14.9764	14.5064	15.3398	14.9045	15.1644	14.4694	15.1998	15.4061	15.0771	15.3618	15.0013	15.8003	16.0403	16.088	16.2325	15.8253	16.256	16.7239	16.2808	16.7145	14.9506	15.6011	16.691	16.4489	16.6259
1201.65	15.393	14.8915	16.5931	15.8053	15.5297	12.29	13.3079	14.859	13.9625	15.2452	13.8641	7.79637	14.365	14.4043	12.2118	12.3638	14.7643	14.8065	15.2107	14.8163	12.9834	13.4923	14.6298	14.5806	15.0281	14.5472	15.3792	14.9519	15.1993	14.514	15.2395	15.4502	15.1102	15.4088	15.0391	15.8516	16.091	16.1315	16.2801	15.8616	16.2905	16.7717	16.3299	16.7684	14.9912	15.6464	16.7441	16.4976	16.6765
1203.58	15.4333	14.9213	16.634	15.8347	15.5578	12.3132	13.3346	14.8949	13.994	15.275	13.8887	7.80863	14.3973	14.4367	12.2395	12.3886	14.7975	14.8378	15.2491	14.8525	13.0065	13.5101	14.6584	14.6135	15.0642	14.5772	15.4115	14.9813	15.2372	14.5449	15.2681	15.4784	15.1454	15.4428	15.07	15.8879	16.1291	16.1648	16.3173	15.8921	16.3194	16.8121	16.3651	16.7974	15.0192	15.6789	16.7805	16.5309	16.7166
1205.51	15.4778	14.9676	16.6837	15.8726	15.5958	12.3431	13.3705	14.9411	14.0313	15.3166	13.9218	7.82721	14.4359	14.477	12.2805	12.423	14.8355	14.8795	15.2883	14.8928	13.0372	13.5398	14.6961	14.659	15.1053	14.6192	15.4631	15.0211	15.2892	14.5868	15.3097	15.518	15.1838	15.4778	15.1191	15.931	16.1715	16.2087	16.351	15.932	16.3693	16.8585	16.4099	16.8451	15.0623	15.722	16.8256	16.5815	16.7675
1207.44	15.5045	14.9928	16.7127	15.9132	15.632	12.3604	13.3959	14.9692	14.0554	15.3465	13.9472	7.83751	14.4619	14.5065	12.3041	12.4427	14.8644	14.9102	15.3163	14.9166	13.0589	13.5743	14.7311	14.6842	15.1251	14.6509	15.4984	15.0548	15.3154	14.6159	15.3411	15.5479	15.2174	15.5116	15.1487	15.9615	16.1939	16.2455	16.3952	15.9603	16.3983	16.8882	16.4417	16.8829	15.0928	15.7549	16.858	16.6112	16.8013
1209.37	15.5476	15.0196	16.7559	15.9587	15.6752	12.3868	13.43	15.006	14.0883	15.3851	13.985	7.85326	14.5006	14.5447	12.3287	12.4737	14.9054	14.9495	15.3625	14.9532	13.0903	13.6107	14.7766	14.7152	15.1712	14.6897	15.5387	15.098	15.3508	14.6537	15.375	15.5924	15.2584	15.5605	15.186	16.0025	16.2327	16.2914	16.4471	16.0063	16.4398	16.9374	16.4806	16.9195	15.131	15.7964	16.9068	16.6525	16.8471
1211.3	15.5814	15.0587	16.791	15.9834	15.6947	12.4033	13.4502	15.0346	14.1108	15.412	14.01	7.8616	14.5308	14.574	12.3421	12.4959	14.9324	14.9796	15.3924	14.9826	13.1077	13.6247	14.8021	14.7464	15.202	14.7156	15.5629	15.1279	15.3982	14.6778	15.4017	15.6288	15.2862	15.5832	15.2107	16.0332	16.2638	16.3218	16.4745	16.0416	16.4694	16.9641	16.5105	16.9472	15.1587	15.8249	16.9393	16.6864	16.8781
1213.23	15.6186	15.099	16.8318	16.007	15.7278	12.4264	13.4814	15.0726	14.1415	15.4494	14.0367	7.8763	14.5663	14.6129	12.3734	12.5282	14.9756	15.0167	15.4225	15.0225	13.1364	13.6474	14.8253	14.7823	15.2346	14.7526	15.5986	15.1595	15.4342	14.7132	15.4431	15.6643	15.3219	15.6125	15.2404	16.0727	16.3062	16.3644	16.5184	16.0736	16.5029	17.001	16.5546	16.9989	15.1948	15.8573	16.9754	16.7318	16.9189
1215.15	15.6423	15.1223	16.8594	16.0302	15.7641	12.4398	13.5018	15.0986	14.1639	15.4756	14.0525	7.88382	14.5924	14.636	12.3963	12.5491	15.0006	15.0401	15.4487	15.0523	13.1588	13.6675	14.8489	14.8107	15.2593	14.7789	15.6272	15.1841	15.4527	14.7471	15.47	15.6875	15.3439	15.6422	15.2685	16.1011	16.3429	16.3933	16.5504	16.0984	16.5313	17.0331	16.5815	17.0238	15.2149	15.8812	17.0054	16.7654	16.9468
1217.08	15.68	15.1515	16.9001	16.0655	15.8052	12.4659	13.5301	15.1348	14.1956	15.5121	14.0832	7.89742	14.6278	14.6678	12.429	12.5726	15.0387	15.0739	15.4861	15.0859	13.1885	13.6991	14.8806	14.8399	15.2893	14.8106	15.6645	15.2251	15.4907	14.7875	15.4982	15.7248	15.377	15.6812	15.2972	16.138	16.3793	16.4275	16.5817	16.1353	16.5746	17.0697	16.6172	17.0471	15.2469	15.9211	17.0494	16.81	16.9872
1219.01	15.7057	15.1711	16.9289	16.0911	15.8292	12.4792	13.5479	15.153	14.216	15.5387	14.105	7.90236	14.6476	14.6896	12.453	12.5838	15.0632	15.0973	15.5117	15.1034	13.2091	13.7245	14.9071	14.8578	15.3085	14.8322	15.6892	15.2509	15.5292	14.8092	15.5163	15.746	15.3997	15.7038	15.3244	16.1622	16.4003	16.454	16.6028	16.1639	16.5993	17.0985	16.6446	17.0813	15.2719	15.9481	17.081	16.8302	17.0178
1220.94	15.7431	15.2139	16.9661	16.1239	15.8619	12.503	13.5746	15.1831	14.2404	15.5723	14.1358	7.91753	14.6757	14.7193	12.473	12.6154	15.0967	15.1236	15.5459	15.1372	13.2316	13.7464	14.9432	14.8871	15.3295	14.8643	15.7243	15.2822	15.5698	14.841	15.549	15.7739	15.432	15.7379	15.3684	16.1942	16.4316	16.4861	16.6406	16.202	16.6225	17.1273	16.6784	17.119	15.3064	15.979	17.1212	16.8634	17.0549
1222.87	15.7679	15.2302	16.9898	16.1411	15.877	12.5177	13.5912	15.2047	14.2603	15.5939	14.1523	7.92716	14.6978	14.7361	12.4812	12.6387	15.1162	15.1414	15.5665	15.159	13.2368	13.7579	14.9549	14.9047	15.3532	14.8845	15.748	15.2993	15.5827	14.864	15.5733	15.8003	15.4577	15.7635	15.3874	16.2185	16.4591	16.5057	16.6609	16.2303	16.638	17.1525	16.7015	17.1279	15.3237	16.0002	17.1479	16.8872	17.085
1224.8	15.8018	15.2533	17.022	16.1723	15.9119	12.5415	13.6165	15.234	14.287	15.6238	14.1726	7.94019	14.7273	14.7697	12.5056	12.6581	15.1435	15.1798	15.5964	15.1894	13.2574	13.7772	14.9785	14.9256	15.3916	14.9098	15.7804	15.3253	15.6024	14.8901	15.601	15.8365	15.4844	15.7958	15.4087	16.2496	16.4881	16.5364	16.6904	16.256	16.6733	17.1893	16.7377	17.1656	15.3483	16.0295	17.1848	16.9164	17.1199
1226.73	15.8248	15.279	17.0466	16.1917	15.9376	12.5519	13.6325	15.257	14.3012	15.6431	14.1837	7.94308	14.7463	14.7903	12.5218	12.6675	15.1643	15.2043	15.6166	15.2072	13.2816	13.7937	14.9973	14.9519	15.4038	14.925	15.8029	15.3532	15.6167	14.9107	15.6135	15.8626	15.5	15.8115	15.4308	16.2726	16.5065	16.5621	16.7134	16.2753	16.694	17.2075	16.7641	17.1915	15.3662	16.0476	17.2049	16.941	17.1443
1228.66	15.8532	15.3105	17.0809	16.2188	15.9595	12.5714	13.6567	15.2879	14.3276	15.6741	14.2105	7.95257	14.7755	14.8155	12.5491	12.6917	15.1918	15.2323	15.6446	15.2341	13.3025	13.8182	15.0242	14.9853	15.4434	14.9542	15.8344	15.3888	15.6507	14.9382	15.6354	15.8851	15.5254	15.8351	15.4595	16.3037	16.5446	16.596	16.7455	16.3049	16.7232	17.2404	16.7971	17.2165	15.3961	16.0817	17.2341	16.9735	17.1777
1230.58	15.8693	15.3327	17.0986	16.2305	15.9756	12.5802	13.669	15.3067	14.3413	15.6934	14.2285	7.95597	14.7958	14.8354	12.5612	12.707	15.2077	15.2465	15.6633	15.2521	13.3136	13.833	15.0416	14.997	15.4639	14.9767	15.8534	15.4031	15.6729	14.9545	15.6546	15.8944	15.5521	15.8578	15.4748	16.3209	16.5752	16.6192	16.7624	16.3261	16.7385	17.2613	16.8127	17.2343	15.416	16.1062	17.2509	16.989	17.1933
1232.51	15.901	15.3517	17.1263	16.262	16.0079	12.5986	13.6906	15.3333	14.366	15.7216	14.2503	7.96663	14.8233	14.8651	12.58	12.7303	15.234	15.274	15.6934	15.2831	13.3351	13.8537	15.065	15.0242	15.479	15.007	15.8869	15.4277	15.6953	14.9817	15.6773	15.9181	15.5833	15.8906	15.5016	16.3484	16.5972	16.6504	16.791	16.3547	16.7671	17.2913	16.8418	17.2646	15.4422	16.1377	17.2812	17.022	17.2337
1234.44	15.9248	15.3562	17.1492	16.2866	16.0273	12.6072	13.7037	15.3495	14.3797	15.7389	14.2611	7.9709	14.8399	14.8817	12.5916	12.7408	15.253	15.295	15.7102	15.3023	13.3445	13.8612	15.0805	15.0391	15.4966	15.02	15.9053	15.4473	15.7053	15.0019	15.6931	15.9388	15.5959	15.909	15.525	16.3679	16.6072	16.6672	16.8212	16.3748	16.7803	17.3112	16.8601	17.2798	15.4576	16.1552	17.3021	17.0452	17.2541
1236.37	15.9555	15.3854	17.1807	16.319	16.0563	12.6228	13.725	15.3745	14.4028	15.7669	14.2841	7.98198	14.8656	14.905	12.6128	12.7594	15.2773	15.3211	15.7366	15.3255	13.3582	13.8795	15.102	15.0486	15.5116	15.0426	15.9262	15.4764	15.7471	15.0287	15.7185	15.9574	15.6161	15.9322	15.5468	16.3952	16.6332	16.6979	16.8509	16.4016	16.8007	17.3373	16.8849	17.3035	15.4787	16.1804	17.3368	17.0737	17.2816
1238.3	15.9697	15.4141	17.1932	16.3298	16.0722	12.6306	13.7345	15.389	14.4144	15.7829	14.2962	7.9826	14.8815	14.9191	12.6252	12.7723	15.2937	15.3355	15.7582	15.3364	13.3621	13.8911	15.1165	15.0607	15.521	15.0572	15.9398	15.4937	15.7758	15.0426	15.7354	15.9596	15.6311	15.9511	15.5601	16.4135	16.648	16.7137	16.8671	16.4141	16.822	17.3532	16.9038	17.3227	15.4902	16.1951	17.3553	17.0905	17.2972
1240.23	15.9968	15.4515	17.2221	16.3393	16.0961	12.6491	13.7564	15.4134	14.4336	15.8066	14.3163	7.98963	14.9036	14.944	12.643	12.7975	15.3237	15.3609	15.7861	15.3585	13.3806	13.9092	15.1379	15.0878	15.5532	15.0783	15.9653	15.5159	15.7981	15.0696	15.756	15.9817	15.6506	15.977	15.5865	16.4374	16.677	16.7347	16.8788	16.4396	16.8524	17.3761	16.9348	17.344	15.5179	16.2179	17.3821	17.1199	17.3195
1242.16	16.0114	15.4524	17.2445	16.3543	16.1126	12.6554	13.7677	15.4303	14.4447	15.8209	14.3242	7.99165	14.9161	14.9574	12.6467	12.8102	15.3362	15.3774	15.7959	15.3728	13.3855	13.9207	15.1435	15.1143	15.5672	15.0942	15.9779	15.5276	15.8077	15.0889	15.7717	16.0002	15.6603	15.9859	15.6063	16.4532	16.704	16.7512	16.883	16.4617	16.8658	17.3872	16.9501	17.3603	15.5367	16.2324	17.3953	17.1405	17.3404
1244.09	16.0347	15.4572	17.2693	16.3788	16.1395	12.6721	13.7852	15.4522	14.4626	15.8433	14.3387	7.99727	14.9369	14.9802	12.6637	12.8252	15.3527	15.4	15.8173	15.4004	13.3982	13.9332	15.1615	15.1342	15.5775	15.1163	15.9945	15.5496	15.8109	15.1107	15.7919	16.0249	15.691	16.0095	15.63	16.4769	16.7323	16.7757	16.9201	16.4781	16.8866	17.4188	16.9716	17.3902	15.5574	16.2595	17.418	17.1695	17.3686
1246.02	16.0558	15.4752	17.2811	16.3959	16.1503	12.6792	13.7959	15.464	14.4715	15.8537	14.3467	7.9952	14.9503	14.9905	12.6743	12.8325	15.3595	15.4093	15.8305	15.4153	13.4173	13.9354	15.1786	15.1313	15.5864	15.1262	16.0067	15.5656	15.8191	15.1243	15.7953	16.0384	15.7119	16.0312	15.6348	16.4906	16.7497	16.7933	16.931	16.4836	16.9013	17.4334	16.9859	17.3954	15.5643	16.272	17.434	17.1815	17.3855
1247.94	16.0804	15.5	17.3052	16.4215	16.1707	12.6934	13.8132	15.4852	14.4898	15.8763	14.3654	8.00235	14.9721	15.0106	12.6885	12.854	15.382	15.4308	15.8526	15.4334	13.4382	13.9527	15.1981	15.1552	15.6099	15.1464	16.0353	15.5903	15.8621	15.1456	15.8116	16.0588	15.7284	16.0523	15.6515	16.5147	16.7677	16.8206	16.9428	16.5119	16.9227	17.4495	17.0152	17.4174	15.5813	16.2923	17.4605	17.202	17.4127
1249.87	16.084	15.5129	17.321	16.4262	16.1828	12.7004	13.818	15.4979	14.4987	15.8917	14.3743	8.00468	14.9834	15.0233	12.6948	12.8601	15.3924	15.4413	15.8654	15.4428	13.4398	13.9629	15.2046	15.1631	15.6332	15.1562	16.0554	15.5991	15.8935	15.1562	15.8223	16.0707	15.7373	16.0532	15.6709	16.5298	16.7753	16.8385	16.9541	16.5292	16.9306	17.4635	17.0271	17.4342	15.5901	16.3036	17.4773	17.215	17.4274
1251.8	16.1094	15.5336	17.3444	16.4455	16.205	12.7154	13.8298	15.5165	14.5137	15.9122	14.3897	8.01234	15.0023	15.0421	12.7133	12.8711	15.4127	15.4602	15.8847	15.462	13.4427	13.9792	15.2209	15.1705	15.6485	15.1762	16.0734	15.6165	15.9042	15.1746	15.8388	16.0898	15.7548	16.0725	15.6883	16.551	16.7926	16.8577	16.9754	16.5464	16.9507	17.4867	17.043	17.4487	15.612	16.3252	17.4994	17.234	17.4434
1253.73	16.1231	15.5435	17.3573	16.4582	16.2113	12.7176	13.8354	15.5243	14.5193	15.9177	14.3948	8.01002	15.0096	15.0505	12.7241	12.8717	15.428	15.4666	15.8851	15.4697	13.4502	13.9806	15.2279	15.1832	15.6397	15.1842	16.071	15.6289	15.9127	15.1838	15.8507	16.0977	15.7621	16.0892	15.6905	16.5583	16.8047	16.8637	16.996	16.5577	16.9595	17.4932	17.0525	17.4546	15.6236	16.332	17.5062	17.2438	17.4535
1255.66	16.1408	15.5623	17.3789	16.4838	16.2231	12.7306	13.8508	15.5405	14.533	15.9327	14.4055	8.01421	15.0246	15.0633	12.7355	12.8817	15.4424	15.4781	15.8968	15.482	13.4636	13.99	15.237	15.2057	15.6587	15.1961	16.0829	15.6472	15.9288	15.2005	15.8678	16.1121	15.7722	16.1002	15.7049	16.5728	16.8174	16.879	17.0175	16.5703	16.9704	17.5082	17.0686	17.4767	15.6356	16.3392	17.5216	17.2609	17.4633
1257.59	16.1502	15.5653	17.388	16.4852	16.2333	12.7328	13.8534	15.5501	14.54	15.9412	14.4095	8.01172	15.0308	15.0667	12.7342	12.887	15.4392	15.4821	15.9019	15.4813	13.4605	13.9949	15.2385	15.2025	15.6644	15.2017	16.0973	15.6499	15.9376	15.2098	15.8708	16.1172	15.7761	16.0998	15.714	16.5813	16.8235	16.8809	17.0205	16.5698	16.9767	17.5135	17.0722	17.4806	15.6364	16.343	17.5273	17.2608	17.4676
1259.52	16.1724	15.5854	17.4064	16.4995	16.2555	12.746	13.8613	15.5683	14.5522	15.9577	14.4218	8.01488	15.0462	15.0785	12.7391	12.8999	15.4476	15.4936	15.912	15.4898	13.4622	14.0008	15.2521	15.2059	15.6766	15.2157	16.118	15.6635	15.9533	15.2195	15.8826	16.1352	15.79	16.1128	15.733	16.5941	16.8438	16.8926	17.0274	16.5863	16.9913	17.5305	17.0883	17.4854	15.647	16.3608	17.5412	17.2775	17.4837
1261.45	16.1895	15.5891	17.4175	16.5123	16.2627	12.7511	13.8663	15.5715	14.5535	15.964	14.4253	8.01362	15.0529	15.0817	12.7436	12.9047	15.4554	15.5	15.9187	15.4933	13.4629	13.9983	15.2612	15.2087	15.6968	15.2209	16.1251	15.6738	15.9509	15.2221	15.8867	16.146	15.794	16.1282	15.7416	16.6025	16.8557	16.9032	17.0362	16.6019	16.9891	17.5328	17.0989	17.4951	15.6524	16.3672	17.5509	17.2882	17.4919
1263.37	16.2122	15.5997	17.4435	16.5313	16.2799	12.7639	13.8861	15.591	14.5697	15.9856	14.4423	8.01947	15.073	15.1046	12.7672	12.9245	15.4811	15.5254	15.9448	15.5196	13.4838	14.0182	15.2794	15.221	15.7133	15.2426	16.1444	15.6956	15.9655	15.2438	15.9025	16.164	15.8139	16.1499	15.7715	16.6281	16.8781	16.9264	17.0647	16.6268	17.009	17.5581	17.1232	17.5261	15.6776	16.3921	17.5806	17.3153	17.5285
1265.3	16.2199	15.6217	17.4576	16.5367	16.286	12.7724	13.8939	15.6056	14.5773	15.9973	14.4516	8.0197	15.0848	15.1213	12.7803	12.9357	15.4978	15.5408	15.9641	15.54	13.4948	14.0313	15.2878	15.2324	15.7146	15.2585	16.1616	15.7055	15.9691	15.2579	15.9194	16.1745	15.8342	16.1615	15.7906	16.6433	16.8968	16.9463	17.0874	16.6454	17.0312	17.581	17.1418	17.5362	15.6943	16.4091	17.5987	17.3363	17.546
1267.23	16.2385	15.642	17.475	16.5517	16.3071	12.791	13.9081	15.6281	14.594	16.0176	14.4697	8.02973	15.1064	15.1404	12.7971	12.9531	15.5242	15.562	15.993	15.568	13.5053	14.0431	15.3112	15.2623	15.7344	15.2786	16.1847	15.7274	15.9879	15.2818	15.94	16.1958	15.853	16.1822	15.8017	16.664	16.9227	16.9772	17.11	16.671	17.0565	17.5993	17.1685	17.5656	15.7171	16.4347	17.6289	17.3672	17.5775
1269.16	16.2497	15.6383	17.4797	16.5604	16.3196	12.799	13.9138	15.6359	14.6018	16.0267	14.4784	8.03088	15.116	15.148	12.8033	12.9649	15.5344	15.5716	16.0106	15.5789	13.5088	14.0455	15.3261	15.2729	15.7459	15.2862	16.1921	15.7415	16.0052	15.2947	15.9481	16.207	15.8585	16.1916	15.8023	16.6751	16.9339	16.9904	17.1201	16.6783	17.0645	17.6124	17.1805	17.5775	15.7251	16.4503	17.647	17.3829	17.5957
1271.09	16.2651	15.6477	17.4984	16.5832	16.339	12.8137	13.9251	15.6507	14.6134	16.045	14.4911	8.03443	15.131	15.1676	12.8122	12.9783	15.5488	15.5897	16.0288	15.5947	13.5209	14.0621	15.3368	15.2822	15.7627	15.3026	16.2094	15.7554	16.026	15.3141	15.9626	16.2176	15.8766	16.2071	15.8149	16.6913	16.9531	17.0084	17.1419	16.6974	17.0865	17.6326	17.199	17.59	15.7363	16.4676	17.6683	17.4029	17.6126
1273.02	16.2616	15.6516	17.5099	16.5879	16.3421	12.8152	13.9256	15.6561	14.6158	16.0492	14.4937	8.03072	15.1337	15.1757	12.8123	12.9799	15.5513	15.5968	16.0345	15.6023	13.5239	14.0639	15.3334	15.2852	15.7548	15.3079	16.2143	15.7597	16.0181	15.3199	15.9656	16.2185	15.8832	16.2085	15.8267	16.7027	16.9674	17.0141	17.1596	16.7166	17.0974	17.634	17.2025	17.5966	15.7394	16.477	17.675	17.4061	17.6243
1274.95	16.277	15.6698	17.5302	16.5966	16.3536	12.827	13.9385	15.6714	14.6325	16.0631	14.5065	8.032	15.1483	15.1865	12.8231	12.9939	15.5692	15.6126	16.0496	15.6218	13.5365	14.0757	15.343	15.3029	15.7607	15.324	16.2279	15.7773	16.0276	15.337	15.983	16.229	15.8944	16.2248	15.8459	16.7208	16.987	17.0278	17.1845	16.7334	17.1078	17.6528	17.2215	17.6117	15.7581	16.496	17.6908	17.4278	17.643
1276.88	16.2886	15.6706	17.5355	16.6015	16.3593	12.8295	13.94	15.6757	14.6321	16.0679	14.5076	8.02677	15.1551	15.1905	12.8304	12.997	15.5767	15.6198	16.0514	15.6285	13.5402	14.0845	15.3473	15.3103	15.7706	15.3288	16.2343	15.7805	16.0575	15.3418	15.9865	16.2334	15.9015	16.235	15.8493	16.7244	16.9923	17.0353	17.1946	16.7368	17.1077	17.6581	17.2302	17.6156	15.762	16.5004	17.6919	17.4402	17.6454
1278.81	16.3055	15.6907	17.5504	16.6184	16.3732	12.8374	13.9496	15.6904	14.6407	16.0846	14.5194	8.03143	15.1711	15.2067	12.844	13.0122	15.5939	15.634	16.0713	15.6412	13.548	14.0919	15.3626	15.3189	15.7859	15.3409	16.2513	15.7963	16.1049	15.3577	15.9976	16.2463	15.9172	16.2471	15.8618	16.7359	16.9992	17.0471	17.2135	16.7523	17.1234	17.6747	17.2441	17.6321	15.7768	16.5142	17.7063	17.4592	17.6652
1280.73	16.3095	15.701	17.5606	16.6199	16.3762	12.8404	13.9495	15.6923	14.6415	16.0867	14.5215	8.02815	15.1743	15.2095	12.8412	13.0138	15.6028	15.6338	16.0765	15.6424	13.5415	14.0886	15.3676	15.3219	15.7926	15.3431	16.2553	15.8001	16.0951	15.3625	16.0068	16.2472	15.9142	16.2492	15.8613	16.7383	16.9979	17.0532	17.2171	16.7537	17.1269	17.6802	17.2455	17.6379	15.7797	16.5192	17.7137	17.4606	17.6793
1282.66	16.3237	15.7011	17.5769	16.6326	16.3935	12.8553	13.9617	15.7064	14.6541	16.0992	14.5298	8.03078	15.1875	15.2207	12.85	13.0218	15.6144	15.6495	16.0904	15.6555	13.5457	14.096	15.3767	15.3316	15.8038	15.3588	16.2645	15.8137	16.0867	15.3782	16.0182	16.2566	15.9204	16.2605	15.8721	16.7512	17.0171	17.0699	17.2219	16.7698	17.1375	17.6917	17.2601	17.6485	15.7891	16.5339	17.7364	17.4764	17.704
1284.59	16.3292	15.6984	17.5827	16.6343	16.4023	12.854	13.9648	15.7139	14.6575	16.1054	14.5316	8.02581	15.1924	15.227	12.8581	13.0272	15.6165	15.6561	16.096	15.6638	13.5512	14.1	15.3709	15.3353	15.8063	15.3661	16.2776	15.8217	16.1144	15.3846	16.0175	16.2594	15.9383	16.2643	15.8804	16.7591	17.0262	17.0794	17.2355	16.7798	17.1421	17.7006	17.269	17.6538	15.7928	16.5397	17.75	17.4827	17.7079
1286.52	16.3411	15.7059	17.6011	16.6507	16.4197	12.8624	13.976	15.7265	14.6666	16.119	14.5441	8.02828	15.2057	15.2421	12.8698	13.0397	15.6245	15.6662	16.1109	15.6792	13.5617	14.1145	15.381	15.3431	15.8203	15.3769	16.294	15.8376	16.1347	15.3976	16.0273	16.2693	15.9512	16.2688	15.8891	16.7717	17.0434	17.0957	17.2563	16.7921	17.1573	17.7167	17.2896	17.6678	15.8106	16.5529	17.7691	17.5037	17.7168
1288.45	16.3413	15.7064	17.6017	16.655	16.4131	12.865	13.9725	15.7258	14.6607	16.1195	14.5454	8.0255	15.2042	15.2412	12.8634	13.0333	15.6243	15.6616	16.1102	15.6789	13.5522	14.1095	15.3868	15.3404	15.8229	15.3745	16.2912	15.8384	16.1148	15.3944	16.0291	16.2692	15.9406	16.2742	15.8918	16.7694	17.0452	17.0953	17.2555	16.793	17.1564	17.7132	17.2901	17.6608	15.8149	16.5546	17.7672	17.5045	17.7141
1290.38	16.3515	15.7268	17.6107	16.6585	16.4177	12.8749	13.9778	15.7367	14.6702	16.1318	14.5526	8.02853	15.2148	15.251	12.8718	13.0427	15.6366	15.6772	16.1246	15.6891	13.5554	14.11	15.3961	15.3549	15.8307	15.3826	16.3036	15.8453	16.1366	15.4055	16.0381	16.2819	15.9468	16.2946	15.9022	16.7808	17.0523	17.1061	17.2632	16.8067	17.1684	17.7284	17.2979	17.6761	15.8245	16.5694	17.7796	17.5117	17.7329
1292.31	16.3574	15.7333	17.6131	16.6572	16.4207	12.8747	13.9784	15.7396	14.6717	16.1322	14.5494	8.02411	15.2168	15.2523	12.8759	13.0462	15.6384	15.6839	16.1304	15.6922	13.5692	14.1075	15.3972	15.3582	15.8273	15.3822	16.3085	15.8434	16.1546	15.4127	16.0384	16.2864	15.9503	16.2942	15.9002	16.7863	17.0506	17.1082	17.2531	16.8037	17.1686	17.7262	17.2988	17.6848	15.824	16.5688	17.7869	17.516	17.7396
1294.24	16.371	15.7501	17.6274	16.6704	16.4403	12.8845	13.9895	15.7525	14.6851	16.1424	14.5592	8.02855	15.2306	15.2643	12.8885	13.0604	15.6501	15.6951	16.1417	15.7071	13.5785	14.1172	15.4052	15.3723	15.8417	15.3978	16.3189	15.8546	16.1377	15.4299	16.0488	16.297	15.9559	16.2987	15.9125	16.7977	17.0645	17.1197	17.2601	16.8142	17.1752	17.7398	17.3133	17.6938	15.8345	16.5852	17.8014	17.5345	17.7515
1296.16	16.3705	15.7349	17.6293	16.6749	16.4386	12.8852	13.9834	15.752	14.683	16.1427	14.556	8.02665	15.2302	15.2636	12.8861	13.0568	15.6503	15.6922	16.1397	15.7088	13.5678	14.1213	15.4007	15.3683	15.8412	15.3978	16.3137	15.8537	16.1294	15.4254	16.0484	16.301	15.9546	16.3038	15.9116	16.7942	17.0694	17.1179	17.2633	16.8194	17.1742	17.7403	17.3118	17.691	15.8363	16.5883	17.7965	17.5374	17.759
1298.09	16.3803	15.7364	17.6406	16.685	16.4406	12.8914	13.9887	15.7617	14.6889	16.1549	14.5587	8.02625	15.2388	15.27	12.8896	13.0631	15.6653	15.7008	16.1494	15.7214	13.5676	14.1281	15.4107	15.3711	15.8467	15.404	16.3186	15.8664	16.1558	15.4335	16.0539	16.3091	15.9717	16.3161	15.9198	16.8041	17.0801	17.1297	17.2784	16.8289	17.1872	17.7487	17.3174	17.7028	15.8458	16.5972	17.8119	17.5502	17.7707
1300.02	16.3792	15.7384	17.6425	16.6812	16.4406	12.8875	13.9886	15.7599	14.6869	16.1546	14.5545	8.01729	15.2382	15.2651	12.8854	13.0629	15.6668	15.7025	16.1505	15.7205	13.5708	14.1218	15.4135	15.3672	15.8431	15.4023	16.3218	15.8704	16.1616	15.4395	16.0545	16.3093	15.9727	16.3093	15.9269	16.8067	17.0788	17.1352	17.2879	16.8271	17.1839	17.7496	17.3206	17.7013	15.8432	16.5991	17.8195	17.5489	17.7686
1301.95	16.3923	15.7424	17.6526	16.6789	16.456	12.8949	13.997	15.7694	14.6934	16.1625	14.5633	8.01812	15.2478	15.2767	12.898	13.0696	15.6746	15.7079	16.1616	15.7269	13.5767	14.1216	15.421	15.3763	15.8511	15.4097	16.3345	15.8802	16.1612	15.4492	16.0662	16.3176	15.9776	16.3152	15.9333	16.8165	17.0821	17.1471	17.2999	16.8365	17.1878	17.7555	17.3363	17.7075	15.8518	16.6101	17.8309	17.5581	17.7795
1303.88	16.3935	15.7447	17.6512	16.6672	16.4568	12.893	13.9918	15.7686	14.69	16.1605	14.5614	8.0143	15.2488	15.2822	12.9001	13.0708	15.6737	15.7027	16.1629	15.7248	13.5682	14.1169	15.4176	15.3777	15.8577	15.4108	16.3336	15.8782	16.1597	15.4449	16.062	16.3181	15.9752	16.3217	15.9278	16.8172	17.0919	17.1499	17.2917	16.8378	17.1871	17.7583	17.3341	17.7085	15.8516	16.6117	17.8317	17.5628	17.779
1305.81	16.407	15.7628	17.6613	16.6898	16.4634	12.8986	13.9972	15.7794	14.6978	16.1705	14.5681	8.01617	15.2593	15.2932	12.9047	13.0776	15.6846	15.7143	16.1711	15.735	13.5737	14.1235	15.4188	15.3921	15.8627	15.421	16.3449	15.8895	16.1787	15.4564	16.0672	16.3257	15.9827	16.3307	15.9385	16.8244	17.1053	17.157	17.2901	16.8466	17.2034	17.7711	17.3389	17.7227	15.8611	16.6213	17.8451	17.5776	17.7913
1307.74	16.4062	15.7656	17.6609	16.6901	16.4558	12.8929	13.9918	15.7775	14.6918	16.1686	14.561	8.00871	15.2571	15.2904	12.8998	13.0688	15.6838	15.715	16.1716	15.7347	13.5694	14.1196	15.415	15.3863	15.8506	15.4172	16.3464	15.8894	16.1745	15.4536	16.0689	16.3174	15.9799	16.3197	15.9407	16.8208	17.094	17.1557	17.2952	16.8418	17.1989	17.769	17.3383	17.7169	15.8585	16.6133	17.844	17.5755	17.7963
1309.67	16.415	15.7699	17.6755	16.6981	16.4728	12.8977	13.9981	15.7902	14.7014	16.1808	14.5687	8.01149	15.2694	15.3021	12.9118	13.0798	15.6957	15.7272	16.1871	15.751	13.5733	14.1213	15.4291	15.3858	15.8685	15.4265	16.3608	15.9033	16.19	15.47	16.077	16.3197	15.9906	16.3213	15.9511	16.834	17.0997	17.1665	17.3117	16.8514	17.2049	17.7828	17.3529	17.7277	15.8705	16.631	17.8551	17.591	17.8123
1311.59	16.4165	15.7492	17.6786	16.7007	16.4805	12.8959	13.9912	15.7922	14.6985	16.1793	14.5682	8.00751	15.2702	15.3032	12.9118	13.083	15.6958	15.7259	16.1861	15.7525	13.5649	14.1168	15.4333	15.3866	15.8668	15.4292	16.3561	15.9026	16.1869	15.4721	16.0733	16.3145	15.9921	16.3284	15.9467	16.8319	17.0997	17.1589	17.306	16.8573	17.2073	17.7844	17.3538	17.7295	15.8719	16.6344	17.8604	17.5915	17.8127
1313.52	16.4255	15.7569	17.6873	16.6991	16.4797	12.9051	13.9915	15.7963	14.6936	16.1839	14.5702	8.00813	15.2761	15.3075	12.9109	13.0843	15.6996	15.7309	16.1902	15.752	13.5669	14.1214	15.437	15.3806	15.8622	15.4362	16.3533	15.9098	16.1789	15.4724	16.0787	16.3227	15.9871	16.3353	15.9435	16.8312	17.1036	17.1579	17.3091	16.8661	17.2143	17.7853	17.3578	17.7338	15.8749	16.6326	17.8732	17.5919	17.8188
1315.45	16.4218	15.7707	17.6887	16.6957	16.4725	12.896	13.9918	15.7965	14.6937	16.1854	14.5673	8.00139	15.2771	15.3085	12.9105	13.0868	15.7006	15.7304	16.1943	15.752	13.5622	14.1248	15.4335	15.372	15.8614	15.4379	16.3563	15.9124	16.1798	15.4757	16.0772	16.3224	15.9841	16.3286	15.9422	16.8302	17.103	17.162	17.304	16.8661	17.2057	17.7848	17.3604	17.741	15.8727	16.6372	17.8732	17.5971	17.8211
1317.38	16.4261	15.7796	17.6982	16.7094	16.4809	12.9018	13.9965	15.8062	14.6953	16.1915	14.5699	8.00083	15.281	15.3158	12.9183	13.0915	15.7051	15.7367	16.2012	15.764	13.5602	14.1284	15.4379	15.381	15.8655	15.4454	16.366	15.9158	16.198	15.4814	16.0798	16.3225	15.9948	16.335	15.9492	16.8311	17.1097	17.1664	17.3125	16.8654	17.2082	17.788	17.3707	17.7446	15.8789	16.6441	17.8798	17.6071	17.8298
1319.31	16.4138	15.7632	17.6858	16.697	16.4732	12.8958	13.983	15.7941	14.6746	16.1776	14.5557	7.99176	15.2682	15.3023	12.9038	13.0728	15.6906	15.7235	16.1861	15.7547	13.5509	14.1188	15.4292	15.3706	15.8546	15.432	16.3527	15.9028	16.1882	15.4595	16.0662	16.3085	15.9879	16.3335	15.9398	16.8195	17.1077	17.159	17.3116	16.8505	17.1983	17.7728	17.3541	17.7267	15.8667	16.6268	17.8674	17.5921	17.8109
1321.24	16.4199	15.7609	17.6894	16.6919	16.4769	12.8908	13.9879	15.7964	14.6816	16.1825	14.5591	7.99338	15.2748	15.3067	12.907	13.0768	15.7015	15.7284	16.1919	15.7573	13.5552	14.1172	15.4304	15.3776	15.8507	15.4315	16.3572	15.9082	16.1933	15.4661	16.0685	16.3105	15.9917	16.3355	15.9541	16.8296	17.112	17.1717	17.3185	16.8583	17.2014	17.7781	17.3553	17.731	15.8717	16.6302	17.8737	17.6004	17.8187
1323.17	16.4197	15.7565	17.6878	16.6955	16.4735	12.8821	13.9827	15.7939	14.6832	16.1826	14.5532	7.98638	15.2723	15.3061	12.9067	13.079	15.7039	15.7284	16.1909	15.7511	13.5527	14.1036	15.4237	15.378	15.8512	15.4273	16.3565	15.9019	16.1918	15.4685	16.0705	16.3066	15.9883	16.327	15.9572	16.8297	17.105	17.1706	17.3181	16.8624	17.1919	17.7749	17.3543	17.7257	15.8698	16.6262	17.8721	17.5983	17.8216
1325.1	16.428	15.7609	17.6946	16.7062	16.4764	12.8844	13.9838	15.799	14.6869	16.1873	14.5539	7.98402	15.2773	15.3107	12.9134	13.0837	15.7103	15.7358	16.1975	15.7561	13.5524	14.1032	15.4196	15.3781	15.8617	15.4342	16.3619	15.9092	16.1901	15.4768	16.0769	16.3116	15.9944	16.3294	15.9553	16.8349	17.109	17.1742	17.3292	16.8728	17.1939	17.784	17.3607	17.7304	15.8731	16.6307	17.878	17.6044	17.8262
1327.03	16.4218	15.7552	17.6919	16.6897	16.4696	12.871	13.9779	15.7924	14.6791	16.1792	14.5486	7.97403	15.2724	15.3047	12.9092	13.0775	15.7023	15.7335	16.195	15.7537	13.542	14.0969	15.4119	15.3672	15.8422	15.4283	16.356	15.907	16.1964	15.4733	16.0657	16.3075	15.985	16.3268	15.9486	16.8301	17.1075	17.1669	17.3221	16.8663	17.1882	17.7763	17.3553	17.7282	15.8653	16.6257	17.8781	17.5993	17.8288
1328.95	16.4248	15.7567	17.6961	16.687	16.4714	12.8691	13.9795	15.7938	14.6784	16.1811	14.5497	7.97107	15.273	15.3072	12.9093	13.0769	15.7038	15.7352	16.1962	15.7609	13.5437	14.0954	15.4121	15.3685	15.8447	15.4308	16.3588	15.9093	16.2087	15.4738	16.0616	16.3105	15.9805	16.327	15.9534	16.8334	17.1134	17.1692	17.3193	16.8661	17.1882	17.7742	17.3595	17.7333	15.8698	16.6293	17.8815	17.6026	17.8361
1330.88	16.4228	15.7469	17.6879	16.6777	16.4609	12.8623	13.9688	15.7857	14.6672	16.1741	14.5362	7.96237	15.2652	15.2995	12.8977	13.0705	15.6972	15.7222	16.1891	15.7536	13.5391	14.0827	15.4031	15.366	15.8386	15.425	16.3496	15.9006	16.1926	15.4667	16.0584	16.3048	15.977	16.3198	15.9404	16.8268	17.1105	17.1589	17.3108	16.8594	17.1787	17.7646	17.3525	17.7196	15.8611	16.6226	17.8657	17.5946	17.826
1332.81	16.426	15.7627	17.6941	16.6833	16.4706	12.8605	13.9728	15.7916	14.6709	16.181	14.536	7.96121	15.2726	15.3063	12.9033	13.0787	15.7067	15.7291	16.194	15.7579	13.5354	14.0813	15.4109	15.3698	15.8443	15.4287	16.359	15.9064	16.1955	15.4797	16.0649	16.3047	15.9868	16.3285	15.9406	16.8314	17.1167	17.1632	17.3155	16.8626	17.1893	17.7702	17.3584	17.7253	15.8663	16.6308	17.8674	17.6	17.831
1334.74	16.4249	15.7746	17.6952	16.6942	16.4807	12.8449	13.9674	15.7938	14.6788	16.1857	14.5359	7.95606	15.2759	15.3101	12.9093	13.0844	15.7083	15.7317	16.1965	15.7595	13.5214	14.0788	15.4107	15.3679	15.8615	15.431	16.3662	15.9118	16.2055	15.4916	16.0614	16.2979	15.9837	16.3284	15.9476	16.8259	17.1148	17.1602	17.3122	16.8635	17.1897	17.7767	17.3608	17.733	15.8691	16.6451	17.8748	17.6067	17.8354
1336.67	16.44	15.7676	17.7102	16.7161	16.4938	12.8445	13.9636	15.8082	14.6856	16.198	14.5446	7.95859	15.2889	15.3254	12.9223	13.0976	15.7115	15.7422	16.2143	15.7741	13.5121	14.0884	15.4184	15.3783	15.8701	15.4463	16.3736	15.9277	16.2118	15.5063	16.0672	16.2985	15.9837	16.3209	15.9576	16.8195	17.1196	17.1573	17.3264	16.8679	17.2006	17.7937	17.3772	17.741	15.8796	16.6599	17.8968	17.6325	17.8562
1338.6	16.4269	15.7264	17.6921	16.6734	16.4667	12.8417	13.9256	15.7891	14.6343	16.1702	14.5223	7.94703	15.269	15.3058	12.9012	13.0646	15.6822	15.7148	16.1944	15.7521	13.4933	14.0733	15.4038	15.3441	15.8349	15.4241	16.3437	15.899	16.1937	15.4645	16.0503	16.2745	15.9628	16.2892	15.9346	16.7807	17.0976	17.1282	17.3064	16.8288	17.1749	17.765	17.3561	17.7086	15.8581	16.6227	17.8778	17.6022	17.8244
1340.53	16.4114	15.7015	17.6681	16.6404	16.4327	12.8476	13.9096	15.7639	14.592	16.1461	14.5	7.93953	15.2465	15.2813	12.8778	13.022	15.6645	15.6899	16.1656	15.7251	13.4792	14.0571	15.379	15.3115	15.8065	15.3963	16.3175	15.8728	16.1825	15.4192	16.0316	16.2626	15.9461	16.2802	15.9088	16.7704	17.0772	17.1172	17.2853	16.8063	17.145	17.7341	17.325	17.6775	15.8354	16.5791	17.8475	17.563	17.7951
1342.46	16.399	15.7132	17.6587	16.6456	16.4244	12.8215	13.9212	15.7556	14.6131	16.1471	14.492	7.92673	15.2439	15.2752	12.8698	13.03	15.6656	15.6904	16.1608	15.7209	13.4754	14.0454	15.3676	15.3079	15.8108	15.3895	16.3194	15.873	16.1676	15.4316	16.0202	16.2656	15.9393	16.2913	15.9076	16.7896	17.0738	17.1267	17.2854	16.8219	17.1355	17.7239	17.3135	17.6768	15.8259	16.5787	17.8408	17.5631	17.7917
1344.38	16.4016	15.7324	17.6599	16.6489	16.4351	12.8117	13.9297	15.7608	14.6295	16.1533	14.4936	7.92184	15.2495	15.2789	12.8741	13.041	15.6726	15.7005	16.1694	15.7251	13.475	14.039	15.3662	15.3154	15.8121	15.3937	16.3315	15.8795	16.1564	15.4508	16.0209	16.2682	15.9419	16.2906	15.9116	16.7993	17.0817	17.1331	17.2912	16.8312	17.1404	17.7313	17.3172	17.6825	15.8299	16.5905	17.8489	17.5726	17.7958
1346.31	16.3896	15.7183	17.6505	16.6411	16.4341	12.7947	13.9173	15.7533	14.619	16.1417	14.4813	7.90987	15.2385	15.2695	12.8646	13.0304	15.6618	15.6912	16.1572	15.7156	13.4619	14.0204	15.3478	15.3064	15.7923	15.386	16.321	15.8705	16.153	15.4448	16.0084	16.2603	15.9353	16.2734	15.8981	16.7865	17.0721	17.1226	17.2763	16.8244	17.1308	17.7237	17.3081	17.6713	15.8229	16.5806	17.8381	17.5623	17.7898
1348.24	16.3852	15.7081	17.6488	16.6398	16.4267	12.7881	13.9098	15.7514	14.6105	16.1368	14.4748	7.90398	15.2348	15.2697	12.8606	13.0254	15.6607	15.6862	16.1506	15.7138	13.453	14.0145	15.3426	15.3046	15.7907	15.3833	16.3133	15.8648	16.1708	15.4434	16.003	16.256	15.9256	16.2748	15.8918	16.7813	17.0728	17.1164	17.2741	16.8215	17.1227	17.7176	17.306	17.6657	15.819	16.5761	17.8336	17.569	17.7882
1350.17	16.3756	15.6889	17.6319	16.6194	16.4056	12.7719	13.896	15.7374	14.5888	16.1223	14.4567	7.89223	15.2203	15.2575	12.8473	13.0115	15.6487	15.6712	16.1359	15.6988	13.4342	14.0067	15.3306	15.2874	15.7695	15.3687	16.2968	15.8494	16.1539	15.4281	15.9867	16.2345	15.9072	16.2693	15.883	16.7655	17.0631	17.1002	17.2648	16.8027	17.1005	17.6982	17.2885	17.6459	15.8008	16.5626	17.8194	17.5547	17.7755
1352.1	16.3807	15.693	17.6381	16.6115	16.411	12.7645	13.8983	15.7368	14.5913	16.1248	14.4566	7.88728	15.2216	15.2554	12.8478	13.0166	15.6535	15.672	16.1361	15.6997	13.4317	14.0056	15.3299	15.2831	15.7639	15.3705	16.2995	15.8545	16.139	15.4322	15.9785	16.2255	15.9089	16.259	15.8837	16.7631	17.058	17.1	17.2538	16.8047	17.1028	17.6898	17.2888	17.6449	15.8007	16.5647	17.8237	17.5507	17.781
1354.03	16.3652	15.6862	17.6267	16.5985	16.3983	12.7493	13.8816	15.7188	14.576	16.1094	14.4434	7.87343	15.2068	15.2401	12.8302	12.9996	15.6357	15.6563	16.1234	15.6861	13.4195	13.9881	15.3217	15.2657	15.7562	15.3555	16.2881	15.8409	16.129	15.419	15.9597	16.2098	15.8946	16.2382	15.8651	16.7478	17.0374	17.0843	17.2448	16.7913	17.0883	17.6766	17.2768	17.6273	15.7852	16.5511	17.8103	17.5325	17.7633
1355.96	16.3608	15.671	17.6182	16.5936	16.3933	12.739	13.8711	15.7099	14.5661	16.1041	14.4355	7.86647	15.2009	15.2329	12.8228	12.9902	15.6285	15.6509	16.1195	15.68	13.4125	13.9768	15.3121	15.2589	15.7448	15.3492	16.2846	15.8357	16.1292	15.408	15.9471	16.202	15.887	16.2396	15.8568	16.7408	17.0304	17.0805	17.2393	16.7749	17.0789	17.6715	17.2708	17.6183	15.779	16.5437	17.8007	17.5239	17.7582
1357.89	16.3521	15.6643	17.6133	16.5937	16.3958	12.7148	13.865	15.7061	14.5678	16.1023	14.4301	7.85339	15.1982	15.2278	12.8227	12.9948	15.6295	15.6499	16.1185	15.6778	13.4032	13.9674	15.3006	15.258	15.7553	15.3476	16.2772	15.8314	16.114	15.4079	15.9373	16.1925	15.8772	16.2312	15.8562	16.7362	17.0278	17.0777	17.2203	16.7704	17.0713	17.6685	17.2661	17.6163	15.776	16.5439	17.7958	17.527	17.7576
1359.82	16.36	15.6777	17.6302	16.6123	16.4131	12.7031	13.8678	15.7201	14.5811	16.1144	14.4384	7.85289	15.2102	15.2423	12.8408	13.0158	15.6371	15.6552	16.1352	15.6935	13.4007	13.9758	15.3103	15.2672	15.7631	15.3613	16.2849	15.8427	16.1234	15.4321	15.9423	16.19	15.8815	16.2234	15.8645	16.7317	17.0484	17.0814	17.2254	16.7878	17.0865	17.6864	17.2784	17.6304	15.7885	16.5715	17.8147	17.5469	17.7748
1361.74	16.3352	15.6419	17.5971	16.5681	16.3707	12.6949	13.8166	15.6867	14.5163	16.0731	14.4018	7.83879	15.1773	15.2148	12.8062	12.9651	15.5932	15.61	16.1001	15.6573	13.3593	13.9504	15.2796	15.2268	15.7105	15.3231	16.2516	15.8036	16.1038	15.3869	15.9111	16.1484	15.8539	16.1831	15.8263	16.6762	17.0309	17.0357	17.1865	16.7356	17.0513	17.6465	17.2445	17.5805	15.7532	16.5174	17.7808	17.5015	17.7393
1363.67	16.3118	15.6059	17.5589	16.5267	16.3211	12.6995	13.7864	15.6525	14.4589	16.035	14.3659	7.82269	15.142	15.1788	12.7625	12.9028	15.5618	15.5815	16.0609	15.6163	13.3298	13.916	15.2413	15.1822	15.6792	15.2819	16.2179	15.7654	16.0692	15.3282	15.8844	16.1244	15.8254	16.1626	15.7903	16.6541	16.9931	17.0082	17.1663	16.6956	17.0022	17.6007	17.2057	17.532	15.7139	16.45	17.7416	17.4528	17.6932
1365.6	16.306	15.5957	17.5555	16.5351	16.3264	12.6627	13.7991	15.6499	14.493	16.0425	14.3628	7.80962	15.1422	15.1729	12.7625	12.9243	15.5713	15.5892	16.058	15.6158	13.3271	13.8991	15.2367	15.1756	15.6799	15.2833	16.2207	15.7707	16.0618	15.3513	15.8736	16.1307	15.8268	16.1604	15.7962	16.6702	16.9771	17.015	17.1686	16.7219	16.9986	17.6034	17.2015	17.5421	15.711	16.4724	17.7399	17.4616	17.6923
1367.53	16.3048	15.5947	17.5479	16.5276	16.3254	12.6506	13.7921	15.6477	14.4917	16.0395	14.3564	7.80182	15.1402	15.1683	12.7618	12.9274	15.567	15.5826	16.0569	15.6164	13.3247	13.8877	15.2267	15.1783	15.6669	15.2785	16.2166	15.7704	16.0582	15.3531	15.8643	16.12	15.8187	16.1528	15.7905	16.6616	16.9654	17.0065	17.1601	16.717	16.9957	17.5956	17.2008	17.5377	15.7062	16.4751	17.7389	17.4649	17.6904
1369.46	16.2794	15.5791	17.5267	16.4955	16.3058	12.6346	13.7688	15.6263	14.4643	16.0155	14.3336	7.78599	15.1211	15.1462	12.7489	12.9051	15.5435	15.5594	16.039	15.5981	13.3081	13.8699	15.2012	15.1607	15.6385	15.2574	16.1924	15.7514	16.0552	15.3262	15.8434	16.0965	15.79	16.1377	15.7667	16.6421	16.9404	16.9861	17.1337	16.6872	16.9662	17.5699	17.1807	17.5115	15.6862	16.4515	17.7187	17.4464	17.6721
1371.39	16.2845	15.5956	17.5433	16.5081	16.3271	12.613	13.7749	15.6357	14.4936	16.0291	14.3426	7.78606	15.1328	15.1593	12.7681	12.9378	15.5557	15.5711	16.0588	15.6153	13.3059	13.8787	15.2137	15.1736	15.6493	15.2748	16.2034	15.7673	16.067	15.3575	15.8477	16.099	15.7966	16.1451	15.7774	16.6472	16.9495	16.9934	17.1361	16.7044	16.9792	17.5843	17.1939	17.5339	15.7018	16.4855	17.7313	17.4681	17.6962
1373.32	16.2547	15.5593	17.5125	16.468	16.2815	12.6029	13.7234	15.6049	14.4341	15.9901	14.3103	7.76857	15.0977	15.1342	12.7312	12.8929	15.5155	15.531	16.0251	15.5759	13.2639	13.856	15.1881	15.1379	15.6145	15.241	16.1633	15.73	16.0051	15.3108	15.819	16.0605	15.7654	16.1065	15.7388	16.5937	16.923	16.9478	17.1082	16.6513	16.9478	17.5445	17.161	17.4887	15.6658	16.4363	17.6981	17.4225	17.6599
1375.25	16.2293	15.5163	17.4762	16.4293	16.234	12.6068	13.6935	15.5737	14.3759	15.9536	14.279	7.74901	15.0612	15.0996	12.6878	12.831	15.4825	15.496	15.9827	15.5325	13.2358	13.8222	15.1493	15.0969	15.5729	15.2002	16.1235	15.6921	15.9714	15.2544	15.7855	16.036	15.7268	16.0751	15.6976	16.5659	16.8934	16.9146	17.0738	16.6048	16.9033	17.5062	17.1185	17.4385	15.6274	16.3778	17.655	17.3752	17.6162
1377.17	16.2114	15.506	17.4588	16.4189	16.2281	12.5648	13.6919	15.5579	14.3871	15.9429	14.2645	7.72877	15.0487	15.08	12.6747	12.8396	15.4706	15.485	15.9685	15.521	13.2265	13.7952	15.1303	15.0784	15.569	15.1881	16.1134	15.6823	15.9889	15.257	15.7648	16.0254	15.7095	16.0617	15.6838	16.5684	16.8791	16.9118	17.0514	16.6094	16.8856	17.489	17.0959	17.4314	15.6149	16.3732	17.6414	17.3661	17.5977
1379.1	16.202	15.4987	17.4419	16.403	16.2165	12.5502	13.6809	15.5464	14.3747	15.9283	14.2499	7.71698	15.0377	15.0665	12.6639	12.8321	15.459	15.4753	15.9576	15.5117	13.2098	13.7778	15.1134	15.0609	15.557	15.1742	16.101	15.6667	15.9712	15.2454	15.749	16.0087	15.7012	16.0454	15.6699	16.5578	16.8635	16.901	17.0359	16.5976	16.8719	17.4719	17.0809	17.4154	15.5982	16.3548	17.6325	17.3529	17.5834
1381.03	16.1808	15.4761	17.4145	16.3824	16.1951	12.5241	13.6638	15.5271	14.3577	15.9096	14.2273	7.69628	15.0162	15.0464	12.6491	12.8137	15.441	15.4629	15.9311	15.4928	13.1909	13.7569	15.0898	15.052	15.5349	15.1531	16.0839	15.6424	15.9289	15.2327	15.7224	15.9901	15.6778	16.0205	15.6526	16.5371	16.843	16.8821	17.0209	16.5747	16.8462	17.451	17.0602	17.3894	15.5751	16.3389	17.6099	17.3329	17.5604
1382.96	16.1762	15.4651	17.4135	16.3812	16.1893	12.5076	13.6599	15.5204	14.3592	15.906	14.2205	7.68593	15.011	15.0432	12.6507	12.8121	15.4406	15.4604	15.9263	15.4911	13.1839	13.75	15.0792	15.0582	15.5373	15.152	16.0868	15.6428	15.9326	15.2353	15.7156	15.986	15.6656	16.0122	15.6419	16.5312	16.8379	16.8797	17.0171	16.5727	16.8411	17.4484	17.0594	17.3894	15.5739	16.3393	17.6076	17.33	17.5581
1384.89	16.1624	15.4513	17.4159	16.382	16.1897	12.4696	13.6445	15.5148	14.369	15.899	14.2114	7.67504	15.0055	15.0401	12.647	12.8272	15.4309	15.4441	15.9283	15.4863	13.1637	13.7461	15.087	15.0474	15.522	15.1486	16.085	15.6413	15.9326	15.2477	15.7027	15.9692	15.6605	16.0032	15.644	16.5154	16.8289	16.8655	17.0031	16.5733	16.8388	17.4426	17.0583	17.3926	15.5671	16.3542	17.6037	17.3294	17.5578
1386.82	16.1275	15.4212	17.3658	16.3311	16.131	12.4745	13.5865	15.4714	14.282	15.8433	14.1678	7.65911	14.9629	15.0001	12.5951	12.7586	15.367	15.3852	15.8878	15.4325	13.1159	13.7015	15.0497	14.9829	15.4637	15.0967	16.0328	15.5885	15.8755	15.1717	15.6648	15.9198	15.6268	15.9621	15.5995	16.452	16.7827	16.8039	16.9591	16.5031	16.7883	17.3878	17.0108	17.3301	15.5198	16.282	17.5539	17.2703	17.5107
1388.75	16.0906	15.3948	17.3097	16.2768	16.0801	12.4553	13.5518	15.423	14.2258	15.7977	14.1238	7.62985	14.9187	14.9528	12.5513	12.7001	15.329	15.3478	15.8414	15.3906	13.0845	13.6501	14.9887	14.9327	15.4233	15.0503	15.9857	15.5452	15.8318	15.1157	15.6265	15.8805	15.5817	15.9208	15.5484	16.424	16.7398	16.763	16.9204	16.4565	16.7332	17.3395	16.9591	17.2768	15.4758	16.2222	17.5068	17.215	17.4604
1390.68	16.0983	15.396	17.3261	16.293	16.1061	12.4216	13.573	15.4368	14.2755	15.8225	14.1341	7.62067	14.9325	14.9611	12.5688	12.7417	15.3559	15.372	15.8531	15.4185	13.0964	13.6551	14.9914	14.9543	15.4381	15.0739	16.0001	15.5667	15.8558	15.1623	15.6278	15.8892	15.5813	15.9274	15.5653	16.4503	16.7526	16.7878	16.9441	16.4923	16.7477	17.3606	16.9758	17.303	15.4956	16.2708	17.5245	17.2491	17.4848
1392.61	16.0832	15.3674	17.3278	16.2859	16.108	12.3807	13.5578	15.436	14.2894	15.8198	14.1273	7.60726	14.9271	14.9576	12.5696	12.762	15.3428	15.3635	15.8477	15.4189	13.0772	13.6531	14.9927	14.9453	15.4186	15.0747	15.989	15.5662	15.8454	15.1826	15.6098	15.8748	15.5743	15.9095	15.5663	16.4253	16.7402	16.7763	16.9324	16.4865	16.7476	17.3624	16.9787	17.3072	15.4946	16.2871	17.5265	17.2599	17.4878
1394.53	16.0494	15.3129	17.2893	16.2264	16.0515	12.3908	13.4958	15.3946	14.1943	15.7607	14.083	7.59006	14.8823	14.9182	12.5252	12.6848	15.2856	15.3072	15.8036	15.3656	13.0244	13.6246	14.9607	14.8952	15.3623	15.0223	15.9387	15.513	15.7795	15.1028	15.5666	15.8194	15.5323	15.8574	15.505	16.3484	16.6904	16.7077	16.8902	16.4062	16.6987	17.3076	16.9337	17.246	15.4463	16.2101	17.4839	17.1998	17.44
1396.46	16.0132	15.2865	17.2529	16.1959	16.021	12.3608	13.4619	15.3579	14.1557	15.7216	14.0446	7.56378	14.8471	14.887	12.4901	12.6479	15.256	15.2715	15.7702	15.3257	12.99	13.5896	14.9272	14.8673	15.3409	14.9871	15.9096	15.4764	15.7517	15.0654	15.5337	15.7862	15.4961	15.8254	15.4731	16.3193	16.654	16.6788	16.863	16.3837	16.6566	17.2716	16.8931	17.2067	15.4093	16.1746	17.4506	17.1576	17.4015
1398.39	15.9824	15.2594	17.2089	16.1639	15.9802	12.3413	13.4251	15.3222	14.1159	15.6828	14.0057	7.54093	14.8117	14.8519	12.4527	12.61	15.2221	15.2378	15.7307	15.2811	12.9596	13.5505	14.889	14.821	15.3005	14.9479	15.8715	15.4359	15.7284	15.0256	15.4975	15.748	15.4662	15.796	15.4351	16.2834	16.6099	16.6461	16.813	16.3489	16.6087	17.2233	16.8526	17.1605	15.3695	16.1287	17.4091	17.1147	17.3547
1400.32	15.9443	15.2123	17.1577	16.1152	15.923	12.3179	13.3935	15.2736	14.0669	15.6386	13.9614	7.50957	14.7663	14.7989	12.4087	12.5529	15.1823	15.1979	15.6831	15.237	12.9307	13.5041	14.833	14.7765	15.252	14.8968	15.8224	15.3895	15.6711	14.9706	15.4533	15.7051	15.425	15.765	15.3816	16.2558	16.5594	16.6128	16.7671	16.3037	16.5589	17.1677	16.7996	17.1081	15.3232	16.0725	17.3513	17.0621	17.3034
1402.25	15.9419	15.2193	17.1701	16.1258	15.9478	12.2751	13.4134	15.2821	14.1212	15.6585	13.9697	7.49891	14.7779	14.8085	12.425	12.6029	15.196	15.2086	15.6999	15.2611	12.933	13.5037	14.8332	14.7939	15.2684	14.9109	15.8352	15.4034	15.6793	15.0191	15.4493	15.7055	15.4245	15.7657	15.4001	16.2743	16.5702	16.6262	16.7662	16.3406	16.5785	17.1906	16.8107	17.1345	15.3368	16.1141	17.3634	17.0942	17.3154
1404.18	15.8973	15.1678	17.122	16.0759	15.8946	12.2514	13.3585	15.2356	14.0568	15.6075	13.9237	7.47099	14.7309	14.7635	12.3806	12.5517	15.1413	15.1537	15.651	15.2142	12.8864	13.4572	14.7849	14.7378	15.2181	14.8604	15.7917	15.3514	15.6375	14.96	15.4035	15.6536	15.3713	15.7064	15.3533	16.2145	16.53	16.5656	16.7229	16.2858	16.5216	17.1367	16.7584	17.0751	15.2881	16.0538	17.316	17.0395	17.2646
1406.11	15.8647	15.1393	17.0773	16.0335	15.8437	12.2389	13.3205	15.1967	14.0038	15.5672	13.8839	7.44507	14.691	14.7203	12.3399	12.4962	15.1062	15.1177	15.6063	15.1696	12.8583	13.4175	14.7459	14.6943	15.1876	14.8148	15.7529	15.3158	15.6051	14.9034	15.3623	15.6174	15.3305	15.6716	15.3101	16.1822	16.4882	16.5269	16.6904	16.2351	16.4747	17.0864	16.7124	17.0301	15.2464	15.9991	17.2696	16.986	17.2191
1408.04	15.8364	15.1192	17.0471	16.0069	15.8246	12.1947	13.3046	15.1724	14.0035	15.5471	13.8589	7.42028	14.6696	14.6946	12.3174	12.4893	15.0888	15.1013	15.5813	15.1449	12.8351	13.3909	14.7224	14.6763	15.1636	14.7971	15.727	15.3019	15.59	14.9001	15.3327	15.5955	15.3066	15.6527	15.2935	16.1658	16.4551	16.5105	16.6669	16.2197	16.455	17.0615	16.6881	17.0136	15.2214	15.9858	17.245	16.9638	17.1951
1409.96	15.8153	15.0814	17.0197	15.9872	15.7982	12.1738	13.2812	15.1496	13.9831	15.5209	13.8334	7.40265	14.6456	14.6715	12.2957	12.4703	15.059	15.0773	15.5571	15.119	12.8064	13.3643	14.6941	14.6512	15.1316	14.7762	15.7008	15.2738	15.5693	14.8798	15.302	15.5701	15.2773	15.6221	15.2669	16.1353	16.4244	16.481	16.6428	16.1945	16.4267	17.0387	16.6616	16.9846	15.1973	15.9672	17.2235	16.9423	17.1773
1411.89	15.7722	15.0377	16.9773	15.9393	15.7539	12.1425	13.2398	15.1076	13.9325	15.4761	13.7924	7.37357	14.6019	14.6281	12.2587	12.4255	15.0179	15.0322	15.5106	15.0788	12.7658	13.3179	14.6477	14.6056	15.0902	14.7331	15.6558	15.2275	15.5185	14.8294	15.2543	15.5277	15.2355	15.5768	15.2165	16.0915	16.3819	16.4378	16.5928	16.1453	16.3794	16.995	16.6137	16.9371	15.1527	15.9192	17.1749	16.8979	17.129
1413.82	15.7547	15.0349	16.9679	15.9202	15.7559	12.1119	13.2284	15.0966	13.9313	15.4695	13.7822	7.35778	14.5931	14.6183	12.2538	12.4309	15.0143	15.0219	15.5068	15.0742	12.7485	13.3037	14.6366	14.5901	15.0703	14.7277	15.6514	15.2222	15.5017	14.8314	15.2393	15.5093	15.2219	15.5647	15.2092	16.0786	16.368	16.4289	16.5761	16.14	16.3734	16.9842	16.6075	16.934	15.1416	15.9214	17.1645	16.8929	17.1189
1415.75	15.7342	15.0221	16.9627	15.9203	15.7613	12.0635	13.2075	15.0879	13.9435	15.466	13.7736	7.33994	14.5872	14.618	12.2537	12.4545	15.0059	15.0096	15.5077	15.0714	12.7214	13.303	14.639	14.5833	15.0536	14.7283	15.6499	15.2171	15.5007	14.8534	15.2228	15.4913	15.2073	15.5438	15.2083	16.054	16.3574	16.4115	16.5573	16.1371	16.3684	16.9837	16.6086	16.9347	15.1362	15.9474	17.1675	16.8947	17.1247
1417.68	15.6858	14.9537	16.9123	15.8662	15.7008	12.0479	13.1307	15.0378	13.8645	15.4066	13.7204	7.31404	14.5388	14.579	12.2097	12.4007	14.9353	14.947	15.4579	15.0144	12.6606	13.2724	14.5984	14.5304	15.0029	14.6739	15.5817	15.1539	15.454	14.788	15.1747	15.4354	15.1628	15.4782	15.1532	15.968	16.3166	16.334	16.5043	16.056	16.3071	16.927	16.5585	16.8673	15.0817	15.8809	17.1199	16.8344	17.0692
1419.61	15.6025	14.8316	16.7875	15.7225	15.5506	12.0626	13.0206	14.9228	13.6716	15.2741	13.6054	7.26249	14.4212	14.4604	12.0888	12.2127	14.8104	14.8295	15.3345	14.8854	12.5747	13.1668	14.4666	14.4005	14.8846	14.543	15.4494	15.0228	15.3291	14.6089	15.0811	15.327	15.0597	15.3706	15.0209	15.8502	16.2067	16.2105	16.4026	15.9022	16.1714	16.7823	16.4261	16.7136	14.9591	15.6873	16.9886	16.683	16.9363
1421.54	15.6032	14.8527	16.7956	15.7478	15.5774	12.0108	13.0509	14.9317	13.7345	15.2914	13.6122	7.24722	14.4294	14.4613	12.098	12.2589	14.8328	14.8485	15.3459	14.9049	12.5818	13.1494	14.467	14.416	14.8901	14.5546	15.4706	15.0458	15.328	14.6554	15.0739	15.3339	15.0542	15.3822	15.0298	15.8851	16.2061	16.2385	16.4051	15.9472	16.1878	16.8038	16.4358	16.7446	14.9727	15.734	16.9941	16.7129	16.9491
1423.47	15.5547	14.8104	16.7457	15.707	15.5314	11.9625	13.0052	14.886	13.6988	15.2439	13.5675	7.21107	14.385	14.4157	12.055	12.2283	14.7911	14.8034	15.2979	14.8607	12.5353	13.1067	14.4278	14.3781	14.8435	14.5105	15.4292	15.0056	15.2792	14.6131	15.0298	15.2902	15.0127	15.339	14.9917	15.8418	16.1587	16.1944	16.3506	15.9047	16.1354	16.7556	16.3911	16.697	14.9279	15.6886	16.9449	16.6695	16.8967
1425.4	15.5163	14.7772	16.7017	15.6597	15.4788	11.9365	12.975	14.8448	13.6593	15.2077	13.528	7.18504	14.3466	14.3746	12.02	12.1832	14.7632	14.7704	15.255	14.8204	12.5066	13.066	14.3849	14.3408	14.8116	14.4726	15.389	14.9699	15.2469	14.569	14.989	15.2534	14.972	15.299	14.9579	15.8144	16.1132	16.1599	16.3031	15.8627	16.0917	16.7105	16.3449	16.6548	14.8906	15.647	16.9028	16.6227	16.8536
1427.32	15.4802	14.7558	16.6779	15.6416	15.4602	11.8749	12.9545	14.8227	13.6685	15.1899	13.5031	7.15664	14.324	14.3535	12.0106	12.1906	14.7436	14.7504	15.2311	14.7986	12.4827	13.0377	14.3656	14.3221	14.7867	14.4542	15.3639	14.9512	15.2302	14.5725	14.9571	15.2302	14.9399	15.2747	14.9403	15.7915	16.0865	16.1365	16.2781	15.8557	16.0751	16.6919	16.3175	16.6432	14.8686	15.6536	16.8776	16.6075	16.8317
1429.25	15.4343	14.6996	16.6236	15.5851	15.4068	11.8588	12.8944	14.7727	13.5933	15.1318	13.4546	7.1277	14.2727	14.3017	11.9643	12.1295	14.6819	14.6896	15.1743	14.7426	12.4262	12.9918	14.3098	14.2604	14.7281	14.4002	15.3099	14.8913	15.1704	14.5073	14.9058	15.1739	14.8847	15.2204	14.8863	15.7227	16.0394	16.0735	16.2264	15.7847	16.0126	16.6325	16.266	16.5761	14.817	15.5831	16.8208	16.551	16.7807
1431.18	15.3755	14.6458	16.5583	15.5127	15.348	11.8242	12.8396	14.712	13.5218	15.0668	13.3972	7.09041	14.2163	14.2387	11.9059	12.0632	14.6196	14.6289	15.1112	14.6844	12.3699	12.9315	14.2417	14.2007	14.6747	14.3363	15.2546	14.8259	15.0917	14.4422	14.8473	15.1099	14.8256	15.1591	14.8224	15.6643	15.9841	16.0166	16.1709	15.7093	15.9426	16.5652	16.2023	16.5054	14.7517	15.5106	16.7584	16.4851	16.7108
1433.11	15.3595	14.6524	16.564	15.5218	15.3631	11.7697	12.8482	14.7128	13.5609	15.0775	13.3966	7.07417	14.2198	14.2443	11.9106	12.1001	14.6276	14.6342	15.1231	14.6972	12.3644	12.9252	14.2459	14.2121	14.6721	14.3458	15.2634	14.8414	15.0919	14.4805	14.8356	15.1032	14.8241	15.1504	14.8215	15.6713	15.9863	16.0234	16.1657	15.7286	15.9534	16.5771	16.2056	16.5283	14.7551	15.549	16.7657	16.5051	16.7236
1435.04	15.2993	14.5863	16.5135	15.4753	15.3089	11.7052	12.784	14.6615	13.5149	15.0248	13.3411	7.03606	14.1697	14.2024	11.8699	12.07	14.5636	14.5757	15.0785	14.6458	12.3055	12.8899	14.2159	14.1528	14.6146	14.2988	15.1968	14.7892	15.0548	14.439	14.7769	15.041	14.7716	15.0945	14.7774	15.5947	15.9339	15.9525	16.1039	15.6728	15.9029	16.5201	16.1551	16.4781	14.7034	15.516	16.707	16.4579	16.6729
1436.97	15.209	14.4458	16.3767	15.3201	15.1444	11.7439	12.6486	14.5357	13.2977	14.8802	13.2177	6.98429	14.0405	14.0708	11.7429	11.858	14.419	14.4439	14.9405	14.4968	12.1945	12.7807	14.0756	14.0036	14.4786	14.1544	15.0461	14.6355	14.918	14.2257	14.6715	14.9074	14.6524	14.9733	14.6294	15.4523	15.7936	15.8036	15.9833	15.4958	15.7492	16.3599	16.0105	16.3	14.5697	15.3002	16.5623	16.279	16.5168
1438.9	15.1695	14.4196	16.3322	15.2924	15.1209	11.6776	12.6359	14.5	13.304	14.8557	13.1855	6.94806	14.0074	14.0265	11.7136	11.8464	14.4049	14.4191	14.899	14.4662	12.1712	12.7278	14.0203	13.9656	14.4453	14.1207	15.026	14.6077	14.8882	14.216	14.6304	14.8778	14.6117	14.9426	14.5953	15.4513	15.753	15.788	15.9479	15.4909	15.7135	16.3295	15.9665	16.2713	14.5356	15.2765	16.5314	16.243	16.4789
1440.83	15.1448	14.4195	16.3075	15.2875	15.1102	11.6158	12.6277	14.478	13.3222	14.8419	13.166	6.92404	13.9928	14.0074	11.7007	11.8647	14.3976	14.4075	14.881	14.4548	12.1552	12.7001	14.0015	13.9461	14.4284	14.1064	15.0169	14.5956	14.8838	14.2301	14.6059	14.8602	14.5868	14.924	14.5841	15.4423	15.7321	15.7744	15.9273	15.4893	15.6978	16.3121	15.9475	16.2622	14.5158	15.2818	16.5144	16.2375	16.4654
1442.75	15.0915	14.3696	16.2529	15.2278	15.0526	11.5647	12.5801	14.424	13.2719	14.7879	13.1131	6.88597	13.9404	13.9599	11.6487	11.8186	14.3485	14.3587	14.8297	14.4036	12.106	12.6481	13.9461	13.8961	14.3766	14.053	14.9635	14.5463	14.8193	14.18	14.553	14.807	14.5312	14.8673	14.5332	15.3842	15.6763	15.7199	15.8665	15.4335	15.645	16.2553	15.8928	16.2085	14.4603	15.2312	16.4598	16.1843	16.4095
1444.68	15.0573	14.3321	16.2277	15.197	15.0318	11.5205	12.5525	14.3958	13.2569	14.7649	13.0848	6.85956	13.9121	13.9345	11.624	11.8035	14.3162	14.332	14.8006	14.379	12.067	12.6169	13.9151	13.8773	14.3478	14.0272	14.9309	14.5219	14.7778	14.1623	14.5158	14.776	14.4944	14.8315	14.5034	15.3468	15.6468	15.6927	15.8259	15.4091	15.6163	16.231	15.8671	16.186	14.4333	15.2191	16.4334	16.1624	16.3832
1446.61	14.9873	14.2542	16.1563	15.1326	14.9665	11.4703	12.4767	14.3298	13.1813	14.6944	13.0202	6.82007	13.848	13.8697	11.567	11.7412	14.237	14.2568	14.7297	14.309	11.9954	12.5599	13.8549	13.8173	14.2701	13.9591	14.8572	14.4483	14.7288	14.0882	14.4455	14.7037	14.4329	14.7582	14.4336	15.2592	15.5862	15.6088	15.7524	15.3306	15.5379	16.1583	15.7971	16.1052	14.3685	15.1496	16.3593	16.0873	16.3101
1448.54	14.921	14.1775	16.0733	15.0492	14.8764	11.4542	12.4045	14.2568	13.0736	14.6086	12.9472	6.78254	13.7734	13.7962	11.5012	11.6456	14.1595	14.1743	14.6555	14.2238	11.9287	12.4947	13.7756	13.74	14.1979	13.8795	14.7797	14.3669	14.6679	13.9841	14.38	14.6248	14.3602	14.6786	14.3524	15.1789	15.5107	15.5267	15.6788	15.2411	15.4493	16.0653	15.7138	16.0083	14.2907	15.0426	16.275	15.994	16.2212
1450.47	14.8663	14.134	16.0238	14.9967	14.833	11.3836	12.3688	14.2109	13.0513	14.5658	12.9022	6.74309	13.7267	13.7523	11.4596	11.624	14.1217	14.1281	14.6138	14.1786	11.8911	12.4463	13.7282	13.6931	14.1648	13.84	14.7381	14.3288	14.6115	13.9619	14.3295	14.5738	14.3038	14.6345	14.315	15.1436	15.46	15.4897	15.6315	15.2108	15.4046	16.0169	15.6653	15.9696	14.2446	15.0182	16.2272	15.9527	16.1724
1452.4	14.837	14.1083	16.0131	14.9765	14.8195	11.3342	12.3475	14.1916	13.0501	14.5516	12.8839	6.71864	13.7077	13.7354	11.4411	11.6252	14.1061	14.1115	14.5976	14.1662	11.8627	12.4206	13.7083	13.6734	14.1382	13.8305	14.7175	14.3164	14.5901	13.9697	14.3026	14.5435	14.2771	14.6103	14.2934	15.1199	15.4378	15.465	15.6083	15.1923	15.3877	16.0061	15.6501	15.9572	14.2267	15.0215	16.2113	15.9438	16.1619
1454.33	14.803	14.0706	16.0096	14.9691	14.8298	11.2265	12.3216	14.1805	13.0848	14.5456	12.8695	6.68833	13.6969	13.7307	11.4362	11.6671	14.0828	14.0986	14.5901	14.1695	11.8223	12.4052	13.7145	13.6693	14.1288	13.8317	14.7066	14.3071	14.5877	14.0105	14.2741	14.5212	14.2614	14.577	14.2892	15.083	15.4211	15.4361	15.58	15.1905	15.3793	16.0124	15.6457	15.9574	14.214	15.0596	16.2034	15.9554	16.1679
1456.26	14.7069	13.9288	15.8805	14.803	14.6856	11.2297	12.1504	14.0579	12.8657	14.3937	12.741	6.63724	13.5712	13.6242	11.3201	11.4927	13.921	13.9493	14.4659	14.0332	11.686	12.3047	13.6043	13.5126	13.9845	13.6947	14.5601	14.1418	14.4465	13.8139	14.1649	14.3825	14.1411	14.4302	14.1358	14.8798	15.2849	15.2464	15.4337	14.9838	15.2339	15.8596	15.5122	15.7818	14.0763	14.8706	16.0593	15.7997	16.0191
1458.18	14.5672	13.7796	15.692	14.6246	14.4667	11.2553	11.9925	13.8835	12.6026	14.2051	12.5793	6.56343	13.4015	13.4482	11.164	11.2376	13.7523	13.7724	14.2801	13.8345	11.5651	12.1661	13.4154	13.3378	13.8025	13.5035	14.375	13.96	14.2462	13.5454	14.0292	14.2295	13.9857	14.283	13.9545	14.724	15.1094	15.0794	15.2909	14.7781	15.0363	15.646	15.3155	15.5614	13.8946	14.5894	15.8712	15.5652	15.812
1460.11	14.5503	13.8006	15.6803	14.6487	14.4735	11.1708	12.0361	13.8771	12.6828	14.223	12.581	6.53752	13.4021	13.4297	11.1692	11.2851	13.7798	13.7953	14.2709	13.8377	11.5739	12.1357	13.3882	13.3567	13.8095	13.5017	14.3848	13.9819	14.2539	13.5947	14.0043	14.2376	13.9731	14.2885	13.9649	14.776	15.0985	15.1192	15.2923	14.8298	15.0414	15.6524	15.3057	15.5833	13.8977	14.636	15.8724	15.5804	15.8122
1462.04	14.5125	13.7827	15.6651	14.6425	14.4842	11.0509	12.0447	13.8641	12.7471	14.2255	12.5699	6.50419	13.3929	13.4154	11.1623	11.3411	13.7785	13.793	14.2582	13.8399	11.5531	12.105	13.3819	13.3592	13.7929	13.4975	14.3818	13.9824	14.2422	13.6507	13.9716	14.2287	13.9539	14.2704	13.9617	14.7812	15.0926	15.1242	15.2677	14.8559	15.0419	15.6494	15.2942	15.5988	13.8908	14.6884	15.8625	15.5963	15.8074
1463.97	14.4335	13.6883	15.5777	14.5473	14.3987	11.0125	11.9519	13.7847	12.6406	14.1328	12.4875	6.4581	13.3121	13.3389	11.0823	11.2557	13.6831	13.7009	14.1722	13.7581	11.472	12.0328	13.3094	13.2673	13.7028	13.4102	14.2911	13.89	14.149	13.5531	13.8941	14.136	13.8691	14.1811	13.8726	14.6705	15.0152	15.0204	15.1725	14.7468	14.9457	15.5512	15.2039	15.5005	13.8055	14.5842	15.7684	15.4979	15.7181
1465.9	14.3344	13.5893	15.4552	14.4308	14.2705	10.9771	11.8498	13.675	12.4938	14.0123	12.3803	6.39704	13.2001	13.2233	10.9788	11.1163	13.5722	13.5906	14.0562	13.6399	11.3893	11.9312	13.1921	13.1427	13.5958	13.2941	14.1784	13.7734	14.0419	13.4028	13.7951	14.0244	13.76	14.0803	13.758	14.5656	14.8927	14.91	15.059	14.6172	14.8174	15.4216	15.0794	15.3624	13.69	14.4303	15.6387	15.3615	15.5848
1467.83	14.302	13.5875	15.4381	14.422	14.2646	10.8962	11.8484	13.6564	12.5221	14.003	12.3636	6.36788	13.1839	13.2028	10.9695	11.1334	13.5665	13.5804	14.0406	13.627	11.3716	11.9029	13.1765	13.1337	13.5807	13.2874	14.1689	13.7645	14.0341	13.4226	13.7639	14.007	13.7346	14.0583	13.7423	14.5674	14.8596	14.9045	15.0375	14.6258	14.8108	15.4157	15.0646	15.3632	13.6759	14.4463	15.6236	15.3611	15.5741
1469.76	14.2597	13.5565	15.4225	14.4014	14.2679	10.7856	11.8207	13.6328	12.5474	13.9877	12.3414	6.33465	13.1638	13.1894	10.9541	11.1675	13.5414	13.5575	14.0283	13.6157	11.3269	11.8846	13.172	13.13	13.5713	13.2816	14.1499	13.7486	14.0125	13.455	13.7277	13.9769	13.7065	14.0224	13.7324	14.5329	14.8395	14.8774	15.0089	14.6231	14.7987	15.4079	15.0556	15.3692	13.6609	14.4836	15.6122	15.3646	15.5697
1471.69	14.1752	13.4351	15.3262	14.2862	14.1613	10.7612	11.6899	13.5366	12.3916	13.8722	12.2407	6.28653	13.0653	13.1069	10.8625	11.0476	13.4157	13.445	13.9417	13.5141	11.2066	11.8117	13.0864	13.019	13.4553	13.1803	14.0348	13.6368	13.9075	13.3238	13.6402	13.8598	13.6127	13.9134	13.6295	14.382	14.7454	14.7413	14.9073	14.4817	14.6857	15.2939	14.962	15.2406	13.5593	14.3588	15.5125	15.2545	15.4715
1473.62	14.0472	13.2844	15.172	14.1297	13.9946	10.7397	11.5486	13.3951	12.1936	13.7191	12.1033	6.21511	12.9218	12.966	10.7378	10.8593	13.2696	13.2987	13.7986	13.3683	11.0941	11.6925	12.9416	12.878	13.3098	13.0324	13.8865	13.49	13.7641	13.1322	13.5201	13.7272	13.486	13.7787	13.4785	14.2404	14.603	14.5936	14.7754	14.3159	14.5352	15.1324	14.8069	15.0665	13.4123	14.1473	15.3593	15.0846	15.324
1475.54	13.98	13.2265	15.0927	14.0651	13.9214	10.6702	11.5048	13.3249	12.1549	13.6593	12.0412	6.16772	12.8586	12.8925	10.6837	10.8134	13.2177	13.2411	13.7275	13.304	11.0533	11.6164	12.8725	12.8165	13.2586	12.9647	13.8303	13.4259	13.701	13.0754	13.4519	13.6709	13.4159	13.7169	13.4081	14.1936	14.5279	14.5388	14.7101	14.2664	14.4737	15.0609	14.7322	15.0041	13.3469	14.0895	15.2865	15.0132	15.2471
1477.47	13.9021	13.1583	15.0006	13.9868	13.83	10.5892	11.4476	13.2392	12.0947	13.5811	11.9675	6.11111	12.7793	12.8034	10.608	10.7496	13.1467	13.1712	13.6361	13.2176	10.9939	11.5236	12.7817	12.7377	13.1774	12.8809	13.7482	13.3469	13.6325	13.0016	13.3709	13.5934	13.3288	13.6442	13.3273	14.1347	14.4388	14.4695	14.6294	14.2005	14.382	14.9746	14.6462	14.9164	13.2686	14.0118	15.1975	14.9257	15.1531
1479.4	13.8507	13.1151	14.9518	13.9457	13.7952	10.498	11.4142	13.1917	12.0896	13.5378	11.9247	6.07137	12.7365	12.7581	10.568	10.7432	13.1054	13.1281	13.5853	13.1723	10.9472	11.4732	12.7383	12.694	13.1363	12.8361	13.6981	13.3067	13.589	12.9866	13.3123	13.5426	13.277	13.5987	13.2925	14.0965	14.3865	14.4295	14.5742	14.1723	14.337	14.9352	14.6	14.8818	13.228	13.9923	15.1506	14.8917	15.1088
1481.33	13.7516	13.0129	14.8441	13.8328	13.6914	10.4286	11.3181	13.0924	11.9828	13.4313	11.827	6.00859	12.6375	12.6604	10.4771	10.6427	13.0023	13.0258	13.4815	13.0673	10.8541	11.3835	12.6388	12.5928	13.0336	12.7343	13.5987	13.2034	13.4692	12.8774	13.2165	13.4379	13.1811	13.4972	13.1908	13.9909	14.2857	14.3245	14.4636	14.0587	14.232	14.8281	14.4915	14.7726	13.1279	13.878	15.0407	14.7797	15.003
1483.26	13.685	12.9617	14.7848	13.7794	13.6357	10.3502	11.2695	13.0317	11.9395	13.3752	11.769	5.96193	12.5771	12.5985	10.4272	10.5986	12.9492	12.9722	13.4212	13.01	10.7976	11.3183	12.5738	12.5383	12.9724	12.6798	13.5443	13.1432	13.3963	12.8298	13.1501	13.3724	13.114	13.4281	13.1297	13.9328	14.2228	14.2691	14.4059	14.0064	14.1707	14.7665	14.4277	14.7144	13.0685	13.8281	14.9792	14.7258	14.9415
1485.19	13.6089	12.9003	14.7201	13.7214	13.5726	10.2513	11.2028	12.9652	11.8896	13.3107	11.704	5.9085	12.5078	12.538	10.3677	10.5595	12.8809	12.9007	13.3547	12.9496	10.7238	11.2543	12.513	12.4761	12.9005	12.6215	13.4768	13.0798	13.3366	12.7855	13.0746	13.2963	13.0417	13.3511	13.0686	13.85	14.1507	14.1919	14.3373	13.9488	14.1013	14.7026	14.3606	14.6525	13.0035	13.7904	14.9136	14.6659	14.8663
1487.12	13.5238	12.8108	14.6437	13.6348	13.4955	10.1794	11.1098	12.8907	11.8047	13.2298	11.628	5.86287	12.4312	12.4725	10.2989	10.4986	12.7869	12.8106	13.2836	12.8791	10.6371	11.1946	12.4518	12.4067	12.8069	12.5496	13.3865	13.0007	13.2657	12.7125	12.9928	13.2058	12.9666	13.2558	12.9913	13.7411	14.0712	14.0879	14.2422	13.8537	14.0255	14.6258	14.2871	14.5744	12.9284	13.7228	14.8344	14.5839	14.7872
1489.05	13.3786	12.6295	14.4775	13.4571	13.3235	10.118	10.9406	12.7374	11.6024	13.0572	11.4768	5.78675	12.2782	12.3227	10.1634	10.3235	12.6126	12.6418	13.1305	12.7135	10.4998	11.0693	12.3119	12.2494	12.6656	12.3847	13.2102	12.8309	13.112	12.52	12.8597	13.0555	12.8274	13.1044	12.8309	13.5647	13.9184	13.9118	14.0832	13.6656	13.8627	14.445	14.1222	14.3805	12.7645	13.5137	14.6574	14.3966	14.6175
1490.97	13.2648	12.5074	14.3372	13.3259	13.1789	10.0761	10.8367	12.6091	11.4576	12.9243	11.356	5.71694	12.1535	12.1892	10.0503	10.1712	12.4956	12.5222	12.9978	12.573	10.4023	10.941	12.1615	12.1084	12.5448	12.2485	13.0845	12.6971	12.9894	12.3593	12.7502	12.9387	12.6982	12.9908	12.6856	13.4535	13.7799	13.7905	13.9557	13.5328	13.7177	14.2959	13.9768	14.2287	12.6349	13.3441	14.512	14.242	14.4689
1492.9	13.194	12.4741	14.2885	13.2921	13.1534	9.93202	10.8204	12.5588	11.4921	12.8947	11.3123	5.66211	12.111	12.1411	10.0106	10.185	12.4706	12.4897	12.9502	12.537	10.3701	10.8814	12.1125	12.0698	12.5065	12.2138	13.0537	12.6674	12.9411	12.3713	12.683	12.8931	12.6366	12.9439	12.6569	13.4344	13.7258	13.7652	13.906	13.52	13.6738	14.2667	13.9296	14.2176	12.5933	13.3541	14.4694	14.2152	14.4282
1494.83	13.1164	12.4086	14.2221	13.2219	13.0965	9.82351	10.7511	12.4907	11.4537	12.8298	11.2487	5.61064	12.0495	12.0815	9.95362	10.1566	12.3969	12.416	12.885	12.4759	10.3004	10.822	12.0615	12.0064	12.4393	12.1519	12.9815	12.6094	12.8618	12.3374	12.6029	12.8154	12.5666	12.8653	12.6048	13.3458	13.6526	13.6807	13.8243	13.452	13.6076	14.2041	13.8659	14.1584	12.5252	13.3187	14.4009	14.1613	14.3637
1496.76	12.9614	12.236	14.0351	13.0384	12.9056	9.76052	10.5754	12.3229	11.2286	12.6446	11.0854	5.52533	11.8824	11.9151	9.79765	9.95891	12.2061	12.2315	12.706	12.2968	10.1454	10.6767	11.8932	11.8317	12.254	11.974	12.7902	12.4307	12.6959	12.1237	12.4603	12.6477	12.4057	12.6937	12.4157	13.1483	13.474	13.4887	13.6423	13.2472	13.4232	14.0075	13.6835	13.9452	12.3498	13.1005	14.2142	13.96	14.1724
1498.69	12.8535	12.1248	13.9052	12.9175	12.7817	9.69349	10.4757	12.2044	11.1076	12.5248	10.9736	5.46091	11.7643	11.7938	9.69536	9.83739	12.0944	12.1222	12.5827	12.1761	10.0422	10.5648	11.7668	11.7121	12.1402	11.8546	12.6758	12.3035	12.5877	11.9899	12.3516	12.537	12.2847	12.5791	12.2863	13.0349	13.3472	13.3724	13.523	13.123	13.3049	13.8719	13.5552	13.8171	12.2319	12.9572	14.094	13.8264	14.0494
1500.62	12.7433	12.0267	13.7972	12.8138	12.6795	9.58356	10.3965	12.1014	11.0363	12.4266	10.8775	5.38942	11.6631	11.6842	9.60501	9.75943	12.0089	12.0318	12.4781	12.0725	9.95286	10.4646	11.6622	11.6272	12.0395	11.7596	12.5873	12.2013	12.4639	11.9017	12.243	12.4397	12.1832	12.4764	12.1898	12.9497	13.2429	13.2806	13.425	13.0356	13.2014	13.7673	13.444	13.7229	12.1321	12.8673	13.9876	13.7251	13.943
1502.55	12.6757	11.98	13.7658	12.7905	12.6583	9.44551	10.3673	12.063	11.0641	12.4019	10.8419	5.34166	11.6249	11.647	9.57194	9.78348	11.9813	11.9985	12.4445	12.047	9.90976	10.4276	11.6361	11.6094	12.0056	11.7394	12.5535	12.1757	12.4122	11.9193	12.1819	12.3987	12.1377	12.4253	12.1691	12.9203	13.2074	13.2465	13.3872	13.0276	13.1715	13.748	13.4119	13.7062	12.0992	12.8878	13.9534	13.7141	13.9157
1504.48	12.5698	11.8854	13.6975	12.7145	12.6007	9.27325	10.27	11.9895	11.0301	12.3246	10.7655	5.27239	11.5461	11.5861	9.50942	9.77908	11.8794	11.9043	12.3785	11.9871	9.80481	10.3647	11.5843	11.5304	11.9255	11.6778	12.4615	12.0993	12.3441	11.8948	12.0791	12.3042	12.0481	12.3251	12.0999	12.7942	13.1251	13.1324	13.2821	12.9424	13.0974	13.6766	13.3414	13.6462	12.0223	12.8677	13.8774	13.6558	13.8464
1506.41	12.3526	11.6223	13.4244	12.3899	12.3045	9.27745	9.96507	11.7418	10.6239	12.0202	10.5168	5.16456	11.2923	11.3512	9.27623	9.44293	11.5645	11.6081	12.1138	11.7112	9.55778	10.1618	11.3347	11.2442	11.6403	11.3988	12.1628	11.8058	12.0751	11.523	11.8711	12.0232	11.8053	12.0637	11.8086	12.4427	12.8581	12.8025	13.0097	12.5679	12.7943	13.3724	13.0621	13.3199	11.7508	12.4895	13.5889	13.3251	13.54
1508.33	12.1702	11.4292	13.1924	12.1981	12.0676	9.22065	9.80072	11.5363	10.3894	11.8156	10.3332	5.06561	11.0989	11.1409	9.09661	9.18643	11.3839	11.4205	11.8919	11.4927	9.42172	9.97448	11.1243	11.0491	11.4527	11.1822	11.9669	11.5995	11.8549	11.2693	11.702	11.8431	11.6239	11.8897	11.6148	12.2835	12.6593	12.6243	12.8241	12.3653	12.5821	13.1467	12.8352	13.0715	11.5446	12.2085	13.3568	13.0739	13.3089
1510.26	12.1048	11.3961	13.1319	12.176	12.0272	9.07238	9.79198	11.4803	10.433	11.7837	10.2868	5.01264	11.0496	11.0822	9.05213	9.20162	11.3673	11.3901	11.8347	11.449	9.38897	9.89733	11.0658	11.0082	11.4068	11.1406	11.9327	11.563	11.8148	11.28	11.6204	11.7985	11.5571	11.838	11.5746	12.2737	12.5957	12.6005	12.7619	12.3609	12.546	13.1042	12.7811	13.0429	11.4984	12.2156	13.3018	13.0496	13.2569
1512.19	11.9736	11.2893	13.0048	12.0458	11.9083	8.93303	9.69682	11.3566	10.349	11.6671	10.1719	4.9284	10.9289	10.9606	8.9376	9.11599	11.2565	11.2786	11.7114	11.3259	9.28667	9.77574	10.9397	10.8932	11.2877	11.0249	11.8135	11.4509	11.7022	11.185	11.4985	11.677	11.434	11.7097	11.447	12.163	12.4608	12.4834	12.6271	12.2477	12.4202	12.9757	12.6507	12.9283	11.3798	12.1113	13.1716	12.9288	13.1279
1514.12	11.8698	11.1928	12.9188	11.9648	11.8424	8.79461	9.61947	11.2693	10.3035	11.5881	10.0915	4.86596	10.8473	10.8797	8.87118	9.07313	11.171	11.1928	11.6276	11.2486	9.19604	9.69508	10.8599	10.8121	11.2074	10.95	11.7314	11.3743	11.6142	11.1328	11.3934	11.5745	11.3412	11.6055	11.3673	12.0669	12.3587	12.3878	12.5264	12.1685	12.3411	12.8974	12.565	12.8503	11.3009	12.0607	13.0904	12.8507	13.047
1516.05	11.6889	10.9892	12.7222	11.7671	11.6511	8.68121	9.43594	11.088	10.0964	11.3932	9.91864	4.76554	10.6697	10.707	8.71846	8.89189	10.9739	10.999	11.4393	11.0652	9.02666	9.55465	10.695	10.6277	11.026	10.7743	11.5427	11.1846	11.4391	10.9332	11.2263	11.3883	11.1678	11.4252	11.193	11.8574	12.1722	12.1848	12.3426	11.9662	12.1536	12.7008	12.3762	12.6403	11.1173	11.8572	12.8896	12.6457	12.8504
1517.98	11.5477	10.8557	12.5772	11.6242	11.5122	8.56951	9.31854	10.9548	9.96985	11.2603	9.79546	4.68323	10.5361	10.5728	8.60371	8.77406	10.8416	10.8668	11.3041	10.9336	8.90361	9.42399	10.5664	10.4937	10.8999	10.6425	11.4122	11.0482	11.326	10.8052	11.0945	11.2522	11.0275	11.2883	11.0553	11.7193	12.0392	12.0469	12.1969	11.8272	12.0154	12.5619	12.2365	12.5085	10.9841	11.7179	12.744	12.51	12.7114
1519.91	11.3825	10.7066	12.4108	11.4672	11.3631	8.40324	9.16971	10.7975	9.84152	11.1064	9.64671	4.58369	10.3804	10.4228	8.46889	8.66626	10.6788	10.7054	11.1511	10.7751	8.75546	9.27283	10.4303	10.3439	10.7388	10.4874	11.2532	10.8817	11.1612	10.6643	10.9281	11.0906	10.8712	11.1268	10.8976	11.5485	11.8936	11.8715	12.0257	11.6658	11.8475	12.3951	12.073	12.3412	10.8213	11.5769	12.5794	12.3521	12.5419
1521.84	11.1861	10.4927	12.1643	11.2306	11.1062	8.35821	8.95231	10.5743	9.55286	10.8629	9.43204	4.4778	10.1559	10.2002	8.26273	8.40372	10.4419	10.4697	10.9213	10.5264	8.56648	9.0826	10.1915	10.111	10.4981	10.2486	10.9978	10.6391	10.8843	10.3652	10.7299	10.8625	10.6497	10.9063	10.6491	11.3068	11.6597	11.6271	11.7906	11.3957	11.5873	12.1341	11.826	12.0592	10.5856	11.2714	12.3221	12.0747	12.2926
1523.76	11.0292	10.3625	12.0151	11.0894	10.9776	8.18233	8.83856	10.436	9.47417	10.7316	9.30622	4.38775	10.0235	10.0589	8.14969	8.31042	10.3175	10.339	10.7847	10.3979	8.46292	8.94621	10.0442	9.99212	10.3775	10.1149	10.8572	10.5146	10.7514	10.2618	10.5791	10.7295	10.4994	10.7689	10.5232	11.1888	11.5045	11.5015	11.6481	11.2804	11.451	11.9958	11.6798	11.9377	10.4534	11.158	12.1724	11.9336	12.1464
1525.69	10.8729	10.2153	11.845	10.9351	10.8161	8.0608	8.69882	10.2781	9.33762	10.573	9.16167	4.29992	9.87719	9.90755	8.01851	8.17791	10.1691	10.1876	10.623	10.2496	8.33118	8.79767	9.88813	9.84295	10.2195	9.95831	10.6994	10.3585	10.6113	10.1101	10.4274	10.5793	10.3434	10.6066	10.3675	11.0313	11.3379	11.3334	11.4872	11.1278	11.2861	11.8221	11.5113	11.769	10.2978	11.0012	11.9988	11.7632	11.969
1527.62	10.6739	10.0126	11.6253	10.7427	10.5986	7.9185	8.53108	10.0746	9.14835	10.3667	8.97563	4.18806	9.68107	9.70673	7.84293	7.99029	9.97529	9.99312	10.4131	10.0462	8.16791	8.61377	9.69136	9.6533	10.0202	9.75727	10.4996	10.1551	10.4056	9.90526	10.2397	10.3878	10.1539	10.4073	10.1652	10.8379	11.123	11.1364	11.2804	10.9312	11.0758	11.6001	11.2947	11.5471	10.0939	10.78	11.7757	11.546	11.7452
1529.55	10.5388	9.87962	11.4966	10.6107	10.4768	7.76048	8.43595	9.94954	9.07225	10.2447	8.86014	4.10505	9.5589	9.57923	7.7378	7.90729	9.86066	9.87711	10.2875	9.92503	8.05596	8.4894	9.57609	9.53046	9.90314	9.63872	10.38	10.0383	10.2669	9.81438	10.0957	10.2498	10.0217	10.2767	10.0471	10.7185	10.9838	11.0142	11.1436	10.8132	10.9565	11.4746	11.1667	11.4354	9.97188	10.6838	11.6445	11.428	11.6122
1531.48	10.3515	9.7045	11.3247	10.4355	10.3279	7.56763	8.28428	9.78648	8.94829	10.0819	8.70618	4.00263	9.39803	9.42204	7.59826	7.79419	9.68808	9.70794	10.1203	9.76378	7.90303	8.34992	9.43208	9.36909	9.73379	9.48246	10.2109	9.87795	10.1022	9.67927	9.91905	10.081	9.85099	10.1083	9.8922	10.5392	10.8198	10.8368	10.9602	10.6508	10.7908	11.3089	10.9948	11.2721	9.80684	10.5518	11.4706	11.2643	11.4356
1533.41	10.1148	9.47044	11.0434	10.171	10.0525	7.4884	8.04118	9.53428	8.6427	9.81482	8.46768	3.88169	9.14666	9.17606	7.36998	7.52187	9.42342	9.4399	9.85306	9.49311	7.68011	8.13305	9.18056	9.10708	9.47034	9.22423	9.94073	9.60774	9.85046	9.37595	9.69896	9.83499	9.60258	9.86197	9.62453	10.2612	10.5573	10.5568	10.6941	10.3591	10.5065	11.0205	10.7132	10.9636	9.54648	10.2292	11.187	10.9656	11.1454
1535.34	9.92566	9.30908	10.862	10.0105	9.88632	7.29419	7.90913	9.36823	8.52163	9.65844	8.31447	3.7768	8.98043	9.00578	7.22685	7.39938	9.27296	9.28481	9.68445	9.33592	7.54023	7.97397	9.01223	8.9621	9.31746	9.07402	9.7847	9.45102	9.68987	9.23861	9.5248	9.67308	9.43639	9.69458	9.46345	10.1129	10.3743	10.3952	10.5177	10.2076	10.3367	10.8554	10.5404	10.8028	9.38725	10.0881	11.0082	10.8005	10.9714
1537.27	9.79163	9.19712	10.7642	9.90986	9.81066	7.06994	7.81738	9.26928	8.49745	9.57026	8.22486	3.69628	8.88419	8.91826	7.1509	7.38642	9.17087	9.19125	9.59254	9.25887	7.43294	7.88434	8.93276	8.89279	9.22871	8.99983	9.69345	9.36348	9.59839	9.20731	9.38634	9.56498	9.32329	9.56953	9.38086	9.99216	10.2643	10.2814	10.3945	10.1287	10.2503	10.7735	10.4481	10.7306	9.29444	10.0674	10.9077	10.7259	10.8841
1539.2	9.49258	8.8704	10.4154	9.55729	9.46454	6.92231	7.47935	8.95382	8.11655	9.21861	7.92191	3.53507	8.56788	8.61598	6.86827	7.06633	8.80522	8.84296	9.26174	8.92271	7.14087	7.61752	8.6413	8.58036	8.89776	8.67392	9.33788	9.01323	9.25422	8.84113	9.09768	9.24692	9.01153	9.24252	9.06256	9.61122	9.93675	9.90998	10.0586	9.75894	9.89987	10.4061	10.096	10.338	8.95888	9.67618	10.5458	10.3488	10.5179
1541.12	9.2365	8.58997	10.0996	9.24129	9.14703	6.84659	7.21906	8.66492	7.78795	8.91564	7.65433	3.41022	8.29123	8.33102	6.61657	6.75812	8.51438	8.54962	8.96654	8.61171	6.90705	7.35603	8.34563	8.28309	8.60374	8.36926	9.02523	8.70949	8.9473	8.49493	8.84361	8.95478	8.734	8.95692	8.75006	9.31695	9.6343	9.60358	9.77362	9.4282	9.57725	10.0712	9.78349	10.0023	8.67134	9.3103	10.2282	9.99912	10.1896
1543.05	9.02081	8.39062	9.8748	9.03974	8.94672	6.65982	7.06457	8.45977	7.63981	8.71789	7.47025	3.29642	8.09974	8.12895	6.44389	6.6041	8.3357	8.36108	8.75101	8.40885	6.75516	7.1716	8.13729	8.08235	8.41364	8.16932	8.82701	8.51551	8.74129	8.30959	8.64384	8.75326	8.53208	8.76026	8.55358	9.13426	9.41834	9.40525	9.55822	9.23623	9.3746	9.85837	9.57241	9.80676	8.4749	9.11501	10.0114	9.78362	9.97169
1544.98	8.81092	8.19374	9.63709	8.84074	8.72274	6.51318	6.89333	8.24701	7.45757	8.50253	7.27753	3.18642	7.89597	7.9161	6.26669	6.41744	8.13878	8.15924	8.5243	8.19445	6.59361	6.98002	7.92138	7.87502	8.20561	7.95812	8.61074	8.30574	8.52031	8.10149	8.44284	8.54546	8.31832	8.55521	8.34974	8.93437	9.18768	9.19465	9.32268	9.02038	9.15629	9.62405	9.3379	9.56908	8.25806	8.88491	9.765	9.55616	9.73437
1546.91	8.59509	8.0163	9.43252	8.65856	8.53842	6.28473	6.74289	8.05834	7.33169	8.32459	7.10827	3.07507	7.71048	7.72608	6.11657	6.28127	7.97143	7.9851	8.33463	8.02176	6.42854	6.79507	7.7334	7.7041	8.03362	7.78243	8.423	8.12798	8.33484	7.94901	8.23724	8.35081	8.12003	8.3654	8.15885	8.75596	8.97562	9.00962	9.11943	8.83798	8.96815	9.4317	9.13335	9.38451	8.07281	8.73014	9.55552	9.36931	9.53321
1548.84	8.37238	7.80728	9.1992	8.43641	8.32591	6.10433	6.5552	7.8464	7.14942	8.11001	6.91357	2.96198	7.50461	7.52261	5.94333	6.11606	7.76026	7.77339	8.12363	7.81497	6.2419	6.60149	7.54179	7.50034	7.81719	7.57993	8.20564	7.91426	8.12525	7.74907	8.02259	8.13288	7.90497	8.15061	7.94341	8.52845	8.74866	8.77822	8.89398	8.61616	8.74946	9.20728	8.90519	9.164	7.86586	8.52643	9.32381	9.14539	9.29909
1550.77	8.09505	7.54255	8.90529	8.16257	8.04663	5.91616	6.32279	7.57892	6.89304	7.83401	6.66915	2.8259	7.24356	7.26389	5.71625	5.88398	7.48586	7.50438	7.84985	7.54229	6.02325	6.37066	7.28713	7.25204	7.54697	7.3181	7.93501	7.6418	7.84352	7.47798	7.76763	7.87089	7.64546	7.88259	7.68536	8.25615	8.47375	8.5026	8.61344	8.34322	8.47006	8.91088	8.61694	8.86754	7.60196	8.246	9.02733	8.85035	8.99986
1552.7	7.86833	7.34341	8.68412	7.95445	7.83869	5.71238	6.14384	7.37235	6.72434	7.62819	6.48136	2.7158	7.04429	7.06637	5.54428	5.7289	7.2807	7.29887	7.64068	7.33698	5.83649	6.18401	7.08485	7.06262	7.34523	7.11814	7.72589	7.43582	7.63113	7.29035	7.54861	7.6511	7.42863	7.65811	7.48743	8.03285	8.25339	8.27695	8.37897	8.1327	8.25687	8.69278	8.39754	8.65113	7.39592	8.0549	8.80691	8.6326	8.77523
1554.63	7.59078	7.06902	8.39278	7.65932	7.56032	5.50045	5.89924	7.10744	6.4715	7.3557	6.23631	2.57712	6.78305	6.80499	5.3196	5.50018	7.00966	7.02609	7.36751	7.06996	5.60556	5.96037	6.83411	6.80314	7.07764	6.85991	7.44651	7.16438	7.3679	7.02973	7.29001	7.38149	7.16424	7.38464	7.22459	7.74957	7.98146	7.98874	8.09856	7.84645	7.97408	8.40454	8.10985	8.36546	7.12547	7.77939	8.51324	8.34105	8.47768
1556.55	7.35397	6.84302	8.18153	7.46246	7.38378	5.22844	5.71236	6.9109	6.33022	7.16054	6.05607	2.46383	6.59021	6.62275	5.16627	5.38161	6.80142	6.82656	7.17494	6.89287	5.42627	5.79039	6.65874	6.60976	6.89133	6.67746	7.24027	6.9681	7.17933	6.87672	7.06684	7.17999	6.96153	7.17239	7.0311	7.52454	7.77303	7.76649	7.87376	7.6467	7.77571	8.20619	7.90497	8.16747	6.93229	7.63923	8.29828	8.14744	8.26537
1558.48	6.90819	6.35956	7.62611	6.93219	6.84438	5.13475	5.24172	6.41822	5.774	6.62028	5.59631	2.24798	6.11783	6.15425	4.7588	4.89789	6.26881	6.31139	6.65767	6.37875	5.04021	5.39319	6.20213	6.1258	6.40025	6.1693	6.69802	6.44195	6.64809	6.30368	6.66759	6.71818	6.51324	6.69723	6.54406	6.99264	7.27357	7.23396	7.36988	7.08324	7.22147	7.63065	7.35127	7.55919	6.41595	7.0105	7.7202	7.54441	7.69138
1560.41	6.64722	6.11622	7.28665	6.6081	6.50719	5.04712	5.01328	6.11736	5.47842	6.32176	5.33109	2.12838	5.83254	5.84575	4.50783	4.60814	6.00859	6.03092	6.34246	6.06882	4.8085	5.11862	5.88238	5.82702	6.08918	5.86343	6.3993	6.14145	6.33678	5.96971	6.38766	6.4062	6.20086	6.39497	6.21409	6.70703	6.91964	6.91763	7.05119	6.74127	6.90055	7.28608	7.02423	7.23072	6.12328	6.64449	7.37589	7.20617	7.35576
1562.34	6.45901	5.97562	7.13254	6.48787	6.37856	4.75273	4.91519	5.97513	5.42823	6.19705	5.20867	2.04375	5.69476	5.7047	4.39194	4.54312	5.89291	5.90698	6.20072	5.93789	4.68269	4.96737	5.73536	5.70244	5.97287	5.74352	6.27571	6.01548	6.21559	5.88751	6.19517	6.2503	6.03918	6.2451	6.07125	6.57568	6.74863	6.77448	6.88025	6.63119	6.7744	7.15004	6.88375	7.11046	5.99305	6.57412	7.22717	7.08345	7.21491
1564.27	6.20436	5.73395	6.86817	6.24794	6.13498	4.54915	4.71087	5.7376	5.225	5.95374	4.99335	1.93128	5.46431	5.47446	4.2008	4.35747	5.65504	5.6697	5.95547	5.69605	4.48174	4.75532	5.50569	5.4867	5.73904	5.51579	6.02749	5.77696	5.97166	5.66441	5.9521	6.00031	5.79967	6.00342	5.82914	6.32215	6.49133	6.5198	6.61211	6.387	6.52699	6.89443	6.62648	6.84669	5.75378	6.3361	6.96035	6.82126	6.9467
1566.2	5.90012	5.44855	6.5568	5.94382	5.84873	4.3076	4.4665	5.45215	4.9741	5.66715	4.7402	1.79604	5.18887	5.19928	3.97218	4.13037	5.37422	5.39163	5.6673	5.41805	4.24498	4.51891	5.23813	5.22406	5.45385	5.24424	5.73442	5.49487	5.67747	5.39545	5.67218	5.7124	5.52348	5.71093	5.55457	6.02759	6.18766	6.21798	6.30389	6.08856	6.22092	6.58501	6.31863	6.54312	5.4716	6.05484	6.63985	6.50886	6.63094
1568.13	5.62466	5.18156	6.25201	5.65755	5.57324	4.09984	4.22983	5.18186	4.73684	5.39163	4.49907	1.6756	4.93107	4.94086	3.75936	3.91837	5.10512	5.12197	5.38907	5.15487	4.02292	4.28639	4.98855	4.9527	5.18518	4.98084	5.45357	5.21947	5.401	5.13331	5.39899	5.43557	5.24782	5.42596	5.2893	5.73063	5.88659	5.91865	6.00677	5.79561	5.92817	6.28093	6.02302	6.24608	5.20332	5.77946	6.33652	6.20824	6.32255
1570.06	5.26886	4.81577	5.82135	5.26746	5.16389	3.94947	3.90431	4.80946	4.36438	5.00072	4.1586	1.51946	4.57123	4.57876	3.4561	3.58596	4.7336	4.74027	4.99857	4.7711	3.7319	3.96777	4.63112	4.58852	4.82323	4.60939	5.06713	4.83023	5.00685	4.73355	5.06021	5.0633	4.88017	5.05231	4.90483	5.33849	5.49008	5.51936	5.61228	5.38727	5.52551	5.85224	5.604	5.80343	4.82662	5.34755	5.90325	5.76775	5.8804
1571.99	5.00866	4.58326	5.56411	5.03291	4.92974	3.7101	3.71699	4.57735	4.1787	4.77286	3.95368	1.41713	4.34694	4.35583	3.27343	3.41583	4.51077	4.52113	4.76782	4.54602	3.54188	3.76098	4.40165	4.37552	4.59048	4.38962	4.83624	4.60371	4.75638	4.52374	4.81575	4.82137	4.64208	4.80946	4.67422	5.09994	5.23964	5.26955	5.35525	5.1449	5.28748	5.60306	5.35406	5.56334	4.60207	5.13884	5.64211	5.52353	5.62102
1573.91	4.71861	4.32682	5.28021	4.76083	4.67103	3.43485	3.49621	4.31896	3.96698	4.51273	3.72473	1.29742	4.09925	4.11349	3.07178	3.22733	4.25214	4.27247	4.50972	4.29352	3.32544	3.53746	4.16357	4.14276	4.33257	4.14399	4.56726	4.34998	4.49559	4.28777	4.54836	4.56562	4.38472	4.54403	4.43045	4.82428	4.96073	4.98911	5.06581	4.87937	5.01364	5.31991	5.07722	5.2871	4.34637	4.89747	5.35339	5.24741	5.33187
1575.84	4.37729	3.98137	4.85919	4.36638	4.27512	3.32036	3.17595	3.95598	3.60645	4.12986	3.39279	1.15675	3.7535	3.76488	2.78607	2.91733	3.87597	3.89809	4.12764	3.91985	3.03316	3.23564	3.82215	3.79093	3.97629	3.78245	4.17263	3.97392	4.13323	3.90055	4.22313	4.20257	4.02912	4.17564	4.05327	4.42967	4.56189	4.58484	4.66668	4.48035	4.61116	4.8901	4.66523	4.84384	3.97101	4.47622	4.92137	4.81824	4.90996
1577.77	4.0526	3.66529	4.48204	4.01878	3.92661	3.14151	2.90664	3.63506	3.30419	3.79417	3.10499	1.03288	3.4415	3.44579	2.53659	2.64765	3.55906	3.57425	3.78674	3.59363	2.78431	2.95849	3.501	3.4767	3.65205	3.46754	3.843	3.64438	3.80111	3.57306	3.91359	3.87671	3.70529	3.84628	3.72237	4.09355	4.20984	4.23003	4.31532	4.12827	4.25474	4.51868	4.30236	4.47493	3.64756	4.11301	4.54113	4.44419	4.53195
1579.7	3.80411	3.45171	4.22752	3.79001	3.70111	2.91286	2.73156	3.41466	3.13049	3.57105	2.91321	0.947745	3.22868	3.23378	2.37195	2.48985	3.35048	3.36163	3.5596	3.38178	2.60252	2.76559	3.28345	3.26803	3.42975	3.25974	3.62316	3.42638	3.57103	3.37235	3.67225	3.64459	3.47234	3.60812	3.4988	3.85609	3.96132	3.98213	4.05441	3.89098	4.02058	4.2709	4.06001	4.23974	3.42924	3.90145	4.28884	4.19836	4.27764
1581.63	3.50307	3.16405	3.89335	3.48568	3.40306	2.70812	2.48832	3.12546	2.87113	3.27182	2.65595	0.834082	2.9514	2.95703	2.14775	2.26091	3.06474	3.07513	3.25978	3.09225	2.3687	2.521	3.00922	2.98784	3.15104	2.97965	3.31441	3.13444	3.26208	3.08968	3.38227	3.34162	3.18428	3.30557	3.20567	3.54725	3.64084	3.66593	3.73124	3.58013	3.70847	3.93945	3.73534	3.90351	3.13647	3.60074	3.9482	3.86397	3.93875
1583.56	3.22711	2.8948	3.58132	3.19987	3.1255	2.52815	2.26493	2.86037	2.63187	2.99603	2.42265	0.738098	2.69757	2.70126	1.94902	2.0548	2.80132	2.81147	2.98477	2.8244	2.15724	2.29204	2.754	2.7368	2.88573	2.721	3.02539	2.86521	2.99014	2.82855	3.1155	3.06327	2.91076	3.02989	2.93578	3.25893	3.33824	3.36555	3.42638	3.28975	3.40986	3.62906	3.43326	3.59375	2.86991	3.31549	3.63348	3.55601	3.62299
1585.49	2.93166	2.6109	3.24934	2.89174	2.81879	2.34265	2.02606	2.57472	2.37021	2.70191	2.17137	0.636099	2.42524	2.42857	1.73431	1.8316	2.5156	2.52793	2.68905	2.53803	1.93453	2.05529	2.47791	2.4682	2.60156	2.44631	2.73179	2.57897	2.70558	2.54878	2.83724	2.7727	2.62163	2.73929	2.64917	2.94901	3.01951	3.04816	3.11117	2.97469	3.09181	3.29755	3.10983	3.26787	2.58349	3.01043	3.29603	3.22249	3.28769
1587.42	2.67071	2.36853	2.95247	2.62521	2.5486	2.17385	1.82098	2.32257	2.1482	2.44328	1.95104	0.552367	2.18686	2.18957	1.55068	1.64219	2.26556	2.27852	2.42919	2.29133	1.74047	1.8531	2.23577	2.23067	2.35552	2.20283	2.47426	2.32574	2.44307	2.30389	2.58101	2.51146	2.36583	2.47694	2.40074	2.67418	2.73541	2.76789	2.82815	2.7008	2.81237	2.99836	2.82275	2.96947	2.33377	2.74737	2.99504	2.92836	2.99022
1589.34	2.38829	2.10758	2.63151	2.33429	2.26097	2.00257	1.6003	2.05237	1.90458	2.16128	1.71556	0.459174	1.93106	1.93297	1.35223	1.43515	1.99756	2.01111	2.14916	2.02521	1.5335	1.63176	1.98204	1.97651	2.07705	1.94177	2.19188	2.0504	2.15563	2.03346	2.3141	2.23688	2.09951	2.19862	2.12666	2.38118	2.43784	2.46402	2.52211	2.4102	2.50934	2.67739	2.51553	2.64927	2.06459	2.45377	2.66962	2.61224	2.6608
1591.27	2.14312	1.8777	2.35569	2.07802	2.01918	1.85144	1.41167	1.82342	1.70012	1.92318	1.51745	0.390641	1.7145	1.71328	1.18881	1.26384	1.77164	1.78585	1.91132	1.79848	1.35479	1.43975	1.75973	1.7589	1.84277	1.72046	1.94665	1.81679	1.91474	1.80383	2.08115	1.99405	1.86789	1.95558	1.88237	2.12612	2.17594	2.19627	2.25975	2.15425	2.25287	2.40444	2.24742	2.38203	1.83417	2.21027	2.38909	2.34162	2.38367
1593.2	1.88532	1.63084	2.06164	1.80981	1.75416	1.69793	1.20709	1.57709	1.47706	1.66969	1.30239	0.313011	1.48293	1.47812	1.0109	1.07692	1.5313	1.54181	1.6573	1.55216	1.17316	1.24179	1.52113	1.52823	1.6003	1.48528	1.68555	1.57192	1.65801	1.56031	1.84161	1.73956	1.62168	1.69955	1.6346	1.85798	1.899	1.91492	1.97924	1.87759	1.97462	2.10623	1.95886	2.0848	1.58665	1.94036	2.09355	2.04786	2.08833
1595.13	1.67116	1.42811	1.80967	1.58522	1.52823	1.58199	1.04004	1.37024	1.29289	1.45289	1.1242	0.257796	1.28976	1.28324	0.868298	0.930653	1.32666	1.3364	1.44343	1.34531	1.01968	1.07287	1.32354	1.32731	1.3959	1.2878	1.46721	1.36353	1.44024	1.35888	1.6364	1.52223	1.40652	1.479	1.42169	1.62442	1.66046	1.67546	1.74102	1.64329	1.73225	1.84881	1.71568	1.82998	1.37776	1.71244	1.8392	1.79276	1.83287
1597.06	1.44954	1.22027	1.54712	1.35259	1.2965	1.45226	0.869211	1.15882	1.10061	1.22771	0.941954	0.194602	1.08941	1.08105	0.722362	0.775516	1.11684	1.12743	1.21988	1.13223	0.859349	0.894383	1.11637	1.12414	1.18334	1.08285	1.2409	1.14924	1.2288	1.149	1.42636	1.30115	1.19071	1.25466	1.20088	1.38731	1.41131	1.4319	1.4914	1.40358	1.48538	1.58724	1.46638	1.57073	1.16291	1.48006	1.57531	1.53194	1.56648
1598.99	1.27115	1.05792	1.33509	1.1669	1.1154	1.34138	0.738034	0.992585	0.954376	1.05023	0.800081	0.153275	0.932682	0.923901	0.610996	0.655441	0.948686	0.961913	1.04619	0.971175	0.736596	0.7577	0.9476	0.963482	1.01195	0.923244	1.05609	0.981272	1.05774	0.983277	1.25303	1.1139	1.01711	1.07579	1.0271	1.19774	1.20943	1.2343	1.28477	1.20536	1.28665	1.37899	1.26385	1.35787	0.995436	1.29127	1.3626	1.32892	1.35384
1600.92	1.07598	0.878058	1.10572	0.95599	0.915522	1.23555	0.592751	0.809091	0.788106	0.857737	0.642651	0.104869	0.761257	0.75191	0.484894	0.520245	0.768244	0.782316	0.855101	0.791197	0.603663	0.619569	0.773263	0.792361	0.830724	0.749765	0.859247	0.795822	0.852689	0.802563	1.07289	0.92204	0.834506	0.886925	0.84475	0.99758	0.99952	1.023	1.06883	0.999236	1.06558	1.14482	1.04469	1.1272	0.811177	1.08945	1.13105	1.10112	1.12698
1602.85	0.933243	0.741195	0.929365	0.794334	0.759306	1.16537	0.487063	0.670111	0.662623	0.713363	0.527069	0.08093	0.632408	0.623588	0.399477	0.428953	0.634429	0.645985	0.711569	0.651419	0.501769	0.507016	0.637878	0.666505	0.692189	0.61659	0.713064	0.654558	0.702251	0.671369	0.930131	0.775407	0.689168	0.733105	0.701076	0.835355	0.832805	0.852416	0.897765	0.837137	0.902008	0.963586	0.875954	0.952575	0.672877	0.932929	0.949559	0.922607	0.948553
1604.77	0.782123	0.599672	0.746394	0.633461	0.598153	1.07507	0.374565	0.526818	0.531295	0.561007	0.406906	0.047853	0.498685	0.49124	0.305918	0.328103	0.495819	0.500699	0.562483	0.507697	0.398688	0.388382	0.498646	0.525574	0.552101	0.476653	0.560638	0.509813	0.570396	0.529509	0.782382	0.624433	0.546705	0.583713	0.546479	0.668617	0.664221	0.682935	0.72751	0.666421	0.732847	0.783013	0.702312	0.767127	0.530538	0.768063	0.764497	0.741433	0.76389
1606.7	0.667403	0.505129	0.606261	0.517861	0.485371	1.01356	0.296108	0.42314	0.440411	0.448042	0.320124	0.033456	0.404166	0.396014	0.245606	0.258377	0.393484	0.399676	0.456483	0.407613	0.329482	0.306556	0.402448	0.418092	0.437906	0.379344	0.444225	0.400937	0.465647	0.424852	0.673788	0.510542	0.437942	0.477067	0.432694	0.545227	0.5428	0.554421	0.595571	0.542732	0.592476	0.641885	0.570275	0.62336	0.427172	0.654782	0.626337	0.606303	0.628182
1608.63	0.549802	0.390582	0.454627	0.385938	0.358662	0.967072	0.208302	0.308432	0.332173	0.323394	0.223556	0.028391	0.296341	0.289239	0.171177	0.175951	0.276528	0.286096	0.332834	0.294494	0.24696	0.219513	0.287326	0.299634	0.313451	0.271604	0.319384	0.280037	0.321533	0.305785	0.561384	0.383382	0.313232	0.351199	0.320753	0.415395	0.409217	0.414543	0.457997	0.410586	0.449034	0.48528	0.423359	0.472197	0.308022	0.519694	0.477322	0.456836	0.475092
1610.56	0.479548	0.318518	0.363896	0.30912	0.279323	0.938779	0.163638	0.242173	0.272906	0.253108	0.170679	0.031911	0.236084	0.228821	0.134714	0.139408	0.213989	0.22353	0.259649	0.231712	0.200953	0.17312	0.217813	0.230341	0.256259	0.210242	0.250418	0.213154	0.237984	0.240658	0.484823	0.298971	0.237368	0.264729	0.250169	0.331781	0.317273	0.324575	0.366512	0.323877	0.370611	0.388738	0.336286	0.376328	0.238669	0.441459	0.384117	0.365135	0.380754
1612.49	0.37889	0.225572	0.259736	0.223427	0.184614	0.849843	0.104861	0.162388	0.198312	0.170296	0.103708	0.042855	0.15919	0.153939	0.083006	0.088446	0.138361	0.14565	0.175263	0.153173	0.147021	0.113082	0.143775	0.155779	0.168353	0.135547	0.171397	0.138507	0.160436	0.166932	0.394292	0.215557	0.159415	0.178423	0.166287	0.239696	0.219632	0.230556	0.284144	0.228452	0.266515	0.282744	0.235836	0.26324	0.159409	0.356356	0.272162	0.258146	0.275791
1614.42	0.303188	0.172403	0.188898	0.164899	0.128052	0.761748	0.078137	0.110854	0.157742	0.119864	0.067706	0.052682	0.113061	0.108083	0.062189	0.065465	0.093171	0.100297	0.123574	0.104111	0.116213	0.080019	0.098231	0.11326	0.106067	0.091174	0.11895	0.094536	0.112675	0.121951	0.330586	0.16488	0.103943	0.1311	0.11404	0.176488	0.153056	0.167407	0.221099	0.169663	0.194122	0.214877	0.170555	0.196309	0.117605	0.307161	0.201649	0.193752	0.198838
1616.35	0.251498	0.115886	0.091477	0.087219	0.06202	0.846539	0.067396	0.048412	0.083271	0.058888	0.056724	0.078488	0.053317	0.052137	0.04725	0.05052	0.056461	0.058694	0.061252	0.058152	0.073658	0.057157	0.059654	0.063841	0.044417	0.053725	0.057367	0.055797	0.060824	0.056517	0.289078	0.095356	0.036662	0.06834	0.052131	0.088814	0.065275	0.083058	0.128459	0.093385	0.105551	0.115252	0.083093	0.096229	0.064943	0.197549	0.106572	0.097361	0.096537
1618.28	0.254032	0.113756	0.073764	0.067739	0.049761	0.882356	0.059492	0.04351	0.081453	0.052094	0.048565	0.062049	0.048499	0.046358	0.037287	0.04021	0.047227	0.052426	0.052836	0.057105	0.065915	0.054446	0.051371	0.054894	0.049799	0.04514	0.055914	0.049887	0.064	0.049057	0.282284	0.078309	0.033188	0.062994	0.045018	0.076377	0.052215	0.066499	0.111964	0.073104	0.084639	0.095456	0.070427	0.075444	0.054095	0.17613	0.092384	0.07929	0.084751
1620.21	0.18852	0.071615	0.04704	0.053485	0.048709	0.747863	0.067761	0.04162	0.057708	0.055347	0.061109	0.0677	0.030699	0.041092	0.039454	0.051816	0.058798	0.059224	0.043672	0.057264	0.061717	0.065923	0.054119	0.054612	0.059467	0.056547	0.062564	0.062609	0.059029	0.043905	0.228087	0.059922	0.038697	0.056954	0.048907	0.050849	0.048419	0.050904	0.076781	0.05229	0.047762	0.06753	0.054633	0.056213	0.054913	0.155431	0.055095	0.049856	0.05856
1622.13	0.179639	0.062017	0.057043	0.071522	0.073886	0.756912	0.081442	0.055966	0.052439	0.072555	0.076494	0.073403	0.037874	0.054636	0.050811	0.065313	0.080626	0.076163	0.059869	0.068061	0.065905	0.078065	0.06787	0.065655	0.066934	0.073955	0.075254	0.083389	0.068434	0.05641	0.209655	0.06576	0.064337	0.071361	0.067587	0.046115	0.062712	0.061633	0.066658	0.06227	0.053392	0.069136	0.066653	0.05889	0.070961	0.141998	0.053962	0.060378	0.06274
1624.06	0.161592	0.046355	0.088076	0.089527	0.097911	0.803545	0.100814	0.080519	0.045665	0.102313	0.101796	0.085532	0.05363	0.076728	0.062157	0.080447	0.11032	0.104783	0.088565	0.095357	0.067513	0.088547	0.095671	0.076587	0.079799	0.097692	0.101435	0.108308	0.084369	0.077782	0.191346	0.073144	0.089987	0.092307	0.094678	0.058477	0.082701	0.081692	0.057952	0.079972	0.073557	0.086113	0.094108	0.079645	0.096709	0.0934	0.074297	0.083093	0.080308
1625.99	0.156022	0.04789	0.080673	0.081534	0.081776	0.766315	0.093114	0.07326	0.041812	0.094417	0.093108	0.073998	0.046534	0.068414	0.055786	0.068343	0.099473	0.092398	0.078176	0.091138	0.060237	0.077732	0.089241	0.071051	0.074767	0.087273	0.099033	0.095802	0.079736	0.070436	0.189708	0.068102	0.078539	0.086718	0.089279	0.056271	0.079118	0.082121	0.065165	0.073658	0.067457	0.079762	0.087186	0.080489	0.087662	0.105089	0.071962	0.07564	0.071828
1627.92	0.140129	0.038886	0.099718	0.102613	0.104994	0.781614	0.106179	0.089169	0.040078	0.113425	0.109016	0.07946	0.062316	0.082663	0.065134	0.083689	0.115416	0.108274	0.094479	0.110472	0.059127	0.094105	0.102658	0.080205	0.095282	0.106147	0.123518	0.116084	0.103971	0.09191	0.175517	0.079562	0.096472	0.099328	0.108498	0.073661	0.098012	0.103328	0.069287	0.093621	0.089035	0.097599	0.107396	0.10131	0.109431	0.081912	0.089406	0.098818	0.087466
1629.85	0.149109	0.04337	0.09052	0.088326	0.094514	0.782435	0.090443	0.075081	0.034971	0.098544	0.093209	0.066457	0.052241	0.070008	0.050416	0.069401	0.09821	0.092095	0.082766	0.092283	0.054309	0.086954	0.091736	0.062241	0.089759	0.092424	0.102727	0.104422	0.093632	0.077638	0.182388	0.072939	0.086646	0.087528	0.096891	0.064975	0.089591	0.090506	0.068249	0.084763	0.080445	0.092811	0.09638	0.088255	0.096004	0.093254	0.076672	0.08569	0.071658
1631.78	0.098831	0.06064	0.117828	0.112265	0.12124	0.670482	0.112105	0.102191	0.050315	0.125894	0.113577	0.07956	0.078899	0.095378	0.067376	0.084885	0.127687	0.117301	0.110141	0.112625	0.061332	0.099426	0.116309	0.089619	0.112925	0.116859	0.124511	0.128126	0.120483	0.096473	0.142023	0.084667	0.107259	0.107111	0.114261	0.083462	0.114192	0.113143	0.079692	0.103181	0.104425	0.119033	0.122	0.120505	0.117309	0.08728	0.10319	0.111637	0.101742
1633.71	0.088741	0.088142	0.144255	0.133888	0.141045	0.608525	0.144045	0.129778	0.069071	0.154743	0.136612	0.095095	0.103761	0.121516	0.089698	0.103166	0.158905	0.147571	0.137348	0.140576	0.083518	0.119262	0.139189	0.123314	0.133227	0.142059	0.15788	0.154836	0.1449	0.117225	0.124442	0.107185	0.128827	0.132911	0.138097	0.106386	0.135056	0.138569	0.096873	0.128075	0.128399	0.147274	0.150862	0.148317	0.142913	0.092984	0.134188	0.138719	0.135968
1635.64	0.098738	0.100145	0.195267	0.178984	0.193994	0.774032	0.181433	0.168223	0.100999	0.200627	0.18005	0.119967	0.133907	0.161413	0.123644	0.140617	0.204133	0.192449	0.177298	0.193697	0.105691	0.149933	0.17446	0.160441	0.179074	0.185425	0.211348	0.202632	0.186037	0.158017	0.137969	0.134507	0.161807	0.167914	0.172412	0.142895	0.175585	0.175084	0.117315	0.173883	0.176529	0.195511	0.202065	0.199625	0.193228	0.102748	0.178929	0.184598	0.187001
1637.56	0.136854	0.052313	0.13361	0.130416	0.139843	0.823848	0.123636	0.112389	0.060151	0.140513	0.125748	0.084409	0.080873	0.10669	0.084985	0.095634	0.139496	0.134399	0.11755	0.135193	0.076724	0.105746	0.126441	0.104213	0.129527	0.131633	0.143069	0.144307	0.132027	0.104037	0.173646	0.093636	0.11447	0.124008	0.123393	0.097432	0.125084	0.126472	0.077769	0.123174	0.120322	0.132639	0.138183	0.137396	0.131295	0.085577	0.116344	0.122682	0.128131
1639.49	0.119562	0.038486	0.12798	0.125424	0.131701	0.746278	0.115373	0.108208	0.053078	0.131597	0.119947	0.079122	0.078562	0.101487	0.078107	0.09304	0.130159	0.127604	0.109244	0.124637	0.067461	0.102009	0.121181	0.100477	0.12371	0.125087	0.127036	0.134297	0.127993	0.099754	0.15762	0.08756	0.109167	0.117856	0.123615	0.092472	0.113521	0.120097	0.072713	0.116509	0.110154	0.12665	0.130586	0.130109	0.121082	0.07476	0.110983	0.121696	0.117859
1641.42	0.124984	0.043691	0.108573	0.108773	0.114972	0.723886	0.104806	0.093371	0.046058	0.113786	0.106769	0.071193	0.065498	0.087037	0.061771	0.078707	0.113756	0.111231	0.09884	0.106824	0.060219	0.098382	0.1011	0.080096	0.112772	0.107573	0.115169	0.115552	0.107397	0.085882	0.164845	0.082673	0.097675	0.105539	0.107934	0.079534	0.10704	0.111001	0.059458	0.10629	0.093914	0.113718	0.115891	0.112542	0.103105	0.089827	0.098913	0.105033	0.103847
1643.35	0.081467	0.078959	0.138525	0.134248	0.145932	0.622589	0.13516	0.123061	0.065299	0.145748	0.134465	0.091457	0.096484	0.116651	0.085385	0.102812	0.14667	0.140711	0.137804	0.133514	0.078222	0.123503	0.12072	0.094608	0.136754	0.134497	0.154717	0.142185	0.129496	0.116963	0.123826	0.110709	0.124179	0.123248	0.12593	0.10252	0.136058	0.137813	0.086606	0.1303	0.125787	0.144768	0.148456	0.148341	0.132972	0.079461	0.135069	0.139435	0.14131
1645.28	0.09089	0.097063	0.164097	0.165614	0.169042	0.63141	0.157556	0.144455	0.080663	0.171092	0.155407	0.106412	0.115268	0.136484	0.108191	0.12524	0.172065	0.163459	0.162609	0.158921	0.100757	0.135032	0.149785	0.125397	0.155513	0.159448	0.177045	0.166321	0.154179	0.141357	0.124191	0.125518	0.137028	0.136683	0.142655	0.122624	0.152777	0.156773	0.11095	0.14478	0.147881	0.172667	0.17573	0.173027	0.161104	0.094734	0.159585	0.168342	0.16002
1647.21	0.101279	0.094715	0.190199	0.179719	0.188916	0.780667	0.170339	0.15706	0.09397	0.196066	0.172971	0.114034	0.125084	0.148387	0.121906	0.144489	0.194534	0.177348	0.173976	0.186197	0.101405	0.14536	0.17529	0.143189	0.172897	0.178725	0.184361	0.192758	0.179386	0.161327	0.145112	0.127304	0.14863	0.157594	0.162457	0.139123	0.166772	0.17382	0.137238	0.164853	0.164999	0.193359	0.194311	0.189321	0.186081	0.095436	0.176198	0.189228	0.173652
1649.14	0.104083	0.082825	0.148291	0.134477	0.143847	0.681944	0.13649	0.119173	0.066146	0.153245	0.134671	0.092085	0.096786	0.113269	0.094891	0.106986	0.158208	0.133263	0.13521	0.143219	0.077872	0.122967	0.135606	0.110507	0.131306	0.138401	0.14099	0.15048	0.136892	0.121306	0.141275	0.107988	0.123305	0.132256	0.132474	0.106772	0.132101	0.140164	0.105087	0.129216	0.133736	0.143939	0.146661	0.143018	0.142157	0.084023	0.136223	0.146419	0.128154
1651.07	0.105673	0.153105	0.225921	0.207446	0.213121	0.46816	0.206395	0.192597	0.119379	0.225898	0.19672	0.135018	0.17241	0.18595	0.155706	0.167027	0.235693	0.203409	0.208256	0.205688	0.127059	0.179212	0.191225	0.175877	0.189631	0.205601	0.21807	0.214513	0.206369	0.18246	0.074726	0.174206	0.178738	0.183216	0.19202	0.16231	0.184206	0.197416	0.157876	0.181812	0.204227	0.219941	0.226235	0.217739	0.209466	0.11191	0.210644	0.221838	0.210495
1653	0.124948	0.147595	0.255838	0.23251	0.244611	0.798934	0.237358	0.217055	0.144382	0.265874	0.228242	0.156096	0.180341	0.212232	0.176625	0.196126	0.263001	0.240167	0.228633	0.242059	0.156243	0.197508	0.2118	0.19429	0.225624	0.240365	0.257059	0.251676	0.240802	0.206719	0.141153	0.198123	0.186226	0.208021	0.216929	0.185507	0.204112	0.219522	0.176223	0.210934	0.219895	0.253221	0.271429	0.248436	0.249022	0.16057	0.229841	0.24953	0.231376
1654.92	0.143049	0.078813	0.162233	0.152167	0.164285	0.867421	0.154247	0.13457	0.082767	0.175726	0.159152	0.108989	0.104695	0.132715	0.107429	0.130948	0.167968	0.156049	0.142553	0.162051	0.092967	0.127256	0.143885	0.129487	0.152174	0.160223	0.171051	0.170586	0.154181	0.13586	0.188425	0.127241	0.130232	0.14372	0.155678	0.120213	0.14935	0.151819	0.114168	0.144564	0.140567	0.160605	0.174306	0.166557	0.166369	0.097242	0.147104	0.158027	0.139634
1656.85	0.153917	0.061546	0.101204	0.097308	0.098365	0.765187	0.103483	0.079884	0.051366	0.113494	0.106524	0.0746	0.061091	0.082795	0.064336	0.082532	0.103684	0.096983	0.089051	0.103565	0.061742	0.083922	0.097387	0.086809	0.090269	0.100809	0.107993	0.11141	0.091439	0.08409	0.198838	0.084703	0.087762	0.094301	0.103019	0.073935	0.097186	0.100818	0.078241	0.083293	0.087303	0.10097	0.108592	0.103984	0.106143	0.100259	0.090554	0.095276	0.088551
1658.78	0.128601	0.063493	0.105738	0.099131	0.10163	0.694653	0.110514	0.086914	0.051413	0.119691	0.113012	0.081452	0.070291	0.090512	0.069013	0.087582	0.113346	0.103828	0.099871	0.111644	0.065281	0.090873	0.101854	0.093287	0.093742	0.107027	0.114368	0.115981	0.101178	0.090615	0.181031	0.088568	0.094384	0.100967	0.105425	0.075628	0.098656	0.106122	0.082175	0.085154	0.088091	0.106624	0.116506	0.104483	0.110579	0.096067	0.09437	0.099786	0.096605
1660.71	0.142057	0.076377	0.09846	0.088451	0.09921	0.677321	0.110085	0.083212	0.054185	0.116661	0.110932	0.082032	0.066167	0.089013	0.070538	0.086695	0.112827	0.099375	0.097754	0.107363	0.074902	0.090806	0.096492	0.090008	0.099868	0.100683	0.11385	0.109602	0.10224	0.089722	0.18754	0.096159	0.092091	0.106384	0.1019	0.071252	0.087866	0.105061	0.090861	0.080095	0.081497	0.104668	0.112157	0.099338	0.104702	0.11904	0.093936	0.096909	0.09299
1662.64	0.154434	0.072022	0.110587	0.107102	0.116864	0.746126	0.122944	0.093995	0.055815	0.128182	0.126557	0.093647	0.072487	0.099921	0.08359	0.100079	0.125814	0.113085	0.108158	0.116943	0.078138	0.102464	0.101446	0.100906	0.111067	0.113831	0.126674	0.124223	0.107384	0.099524	0.198632	0.104802	0.106418	0.117422	0.112749	0.077251	0.088974	0.115324	0.089595	0.086455	0.093672	0.111803	0.124083	0.115982	0.118408	0.109225	0.100123	0.102418	0.102528
1664.57	0.176985	0.071177	0.078604	0.086594	0.089887	0.74767	0.097966	0.067785	0.056936	0.095312	0.096131	0.075814	0.05201	0.075275	0.066245	0.07329	0.087903	0.083017	0.079688	0.086759	0.066988	0.084007	0.079174	0.083082	0.082175	0.086354	0.089561	0.092035	0.074715	0.072335	0.224751	0.092441	0.083969	0.096611	0.086107	0.060987	0.06548	0.087828	0.0705	0.065608	0.07151	0.083864	0.093065	0.082608	0.088549	0.126573	0.074824	0.072676	0.076937
1666.5	0.138762	0.057	0.089221	0.091805	0.102594	0.635011	0.114324	0.080732	0.058458	0.111364	0.108301	0.08778	0.064909	0.086745	0.079286	0.088146	0.103654	0.092828	0.092528	0.100088	0.073666	0.090072	0.088673	0.087467	0.104881	0.098842	0.099411	0.102301	0.093436	0.08556	0.198553	0.097388	0.087228	0.099585	0.096587	0.067832	0.072493	0.094354	0.074348	0.077738	0.083256	0.095381	0.104637	0.090585	0.101134	0.134179	0.079336	0.086548	0.087033
1668.43	0.174515	0.091646	0.102156	0.102762	0.104306	0.687388	0.128068	0.087365	0.076199	0.120573	0.114659	0.096286	0.06944	0.097914	0.089444	0.098163	0.112255	0.099466	0.097668	0.113013	0.093904	0.095271	0.09274	0.090292	0.100539	0.105733	0.108437	0.111133	0.105401	0.094089	0.227556	0.114897	0.087224	0.102626	0.098745	0.077033	0.075369	0.100712	0.098467	0.083601	0.100251	0.110507	0.115004	0.103574	0.112376	0.157704	0.097954	0.099017	0.102553
1670.35	0.199825	0.105447	0.096508	0.0954	0.091044	0.775349	0.127269	0.082115	0.073802	0.118071	0.115092	0.104514	0.066177	0.097714	0.087178	0.096941	0.108854	0.098591	0.092078	0.113098	0.092836	0.089962	0.092701	0.09204	0.094019	0.105335	0.105548	0.110731	0.098386	0.090336	0.257171	0.114017	0.083278	0.098388	0.088711	0.075027	0.074699	0.095085	0.113277	0.08083	0.097309	0.110623	0.111063	0.099327	0.112288	0.149434	0.100988	0.09461	0.102051
1672.28	0.225681	0.130472	0.105151	0.09331	0.086752	0.725029	0.106646	0.078608	0.096047	0.099106	0.089417	0.086694	0.068874	0.086478	0.073928	0.075622	0.078939	0.088206	0.086136	0.094312	0.093577	0.080443	0.081487	0.089175	0.091245	0.080363	0.085997	0.090652	0.094552	0.081938	0.276916	0.126787	0.083172	0.101165	0.079352	0.095752	0.081864	0.094226	0.140317	0.092534	0.108639	0.122031	0.104201	0.099278	0.095424	0.199748	0.120559	0.107151	0.114386
1674.21	0.237609	0.142541	0.11964	0.109244	0.102572	0.727402	0.115808	0.086538	0.100089	0.106245	0.098468	0.099104	0.075451	0.094293	0.080576	0.087794	0.08164	0.095174	0.096076	0.099636	0.099392	0.097803	0.090535	0.087851	0.089552	0.085377	0.092883	0.095919	0.10941	0.086521	0.290546	0.136651	0.091398	0.11764	0.089538	0.102411	0.089977	0.104276	0.151055	0.1008	0.11777	0.130504	0.111938	0.109233	0.103845	0.209102	0.137493	0.118857	0.124466
1676.14	0.333346	0.195722	0.184971	0.165453	0.134044	0.849195	0.109632	0.127102	0.14766	0.129132	0.094964	0.081892	0.118433	0.124348	0.08518	0.088023	0.099013	0.11831	0.131728	0.121311	0.12884	0.106467	0.121245	0.107111	0.118274	0.101988	0.123381	0.11123	0.148037	0.12528	0.375048	0.186019	0.118636	0.149062	0.11522	0.1652	0.146406	0.1596	0.216616	0.166114	0.182274	0.193785	0.156363	0.176555	0.122845	0.274376	0.209613	0.192128	0.198633
1678.07	0.341646	0.204537	0.226744	0.183531	0.159935	0.77577	0.109883	0.148214	0.170975	0.148481	0.098773	0.07768	0.1363	0.143842	0.089333	0.089593	0.121766	0.135082	0.155926	0.142475	0.137237	0.113482	0.140486	0.137902	0.138137	0.122279	0.148766	0.133523	0.176155	0.151776	0.389831	0.21366	0.1417	0.173148	0.145851	0.205016	0.19011	0.200886	0.263201	0.205508	0.21486	0.233881	0.191776	0.218754	0.141187	0.317919	0.24791	0.231829	0.23578
1680	0.401634	0.262526	0.310709	0.245392	0.233328	0.773548	0.145427	0.208261	0.228053	0.213002	0.141904	0.075469	0.189809	0.199867	0.125383	0.128192	0.174586	0.194268	0.2213	0.203539	0.173697	0.153354	0.192737	0.204706	0.200658	0.177639	0.218272	0.193358	0.22391	0.210611	0.439527	0.276658	0.200782	0.238296	0.208954	0.276211	0.267693	0.272574	0.34264	0.283091	0.286624	0.323836	0.268359	0.299202	0.202366	0.395585	0.328139	0.315891	0.324489
1681.93	0.391269	0.266216	0.332706	0.264427	0.257454	0.677112	0.162843	0.219866	0.24149	0.232827	0.15582	0.105922	0.19555	0.211429	0.13242	0.135614	0.183246	0.217782	0.239846	0.224396	0.188993	0.164137	0.215266	0.220414	0.218483	0.189704	0.242009	0.213948	0.227811	0.229983	0.442514	0.312135	0.232937	0.275958	0.232244	0.305704	0.303151	0.305003	0.384055	0.321602	0.310818	0.357892	0.287949	0.328521	0.219055	0.429058	0.351996	0.34018	0.344245
1683.86	0.583498	0.399885	0.475509	0.394459	0.37869	0.968105	0.238822	0.332	0.334258	0.34033	0.234034	0.117217	0.306495	0.313064	0.201836	0.196172	0.287574	0.327307	0.355529	0.328765	0.256716	0.239462	0.325828	0.308821	0.322212	0.281778	0.350833	0.318633	0.347381	0.332509	0.603349	0.423942	0.341434	0.383535	0.330922	0.41975	0.428471	0.428958	0.523181	0.436258	0.443769	0.498272	0.415184	0.461983	0.319566	0.52185	0.506664	0.480581	0.495046
1685.79	0.733219	0.52431	0.648672	0.547351	0.510709	1.07359	0.306212	0.463036	0.439875	0.471629	0.323327	0.083522	0.429725	0.424732	0.263539	0.267628	0.417155	0.442371	0.485942	0.444048	0.329815	0.325429	0.432964	0.41638	0.44835	0.399782	0.485694	0.445246	0.487034	0.454001	0.744452	0.538056	0.467757	0.509446	0.471444	0.576851	0.584018	0.582982	0.664223	0.578903	0.601327	0.656332	0.587029	0.631692	0.444365	0.65861	0.679543	0.651518	0.670553
1687.71	0.871494	0.677611	0.839063	0.720652	0.678013	1.06704	0.41959	0.616918	0.58088	0.636346	0.452608	0.084852	0.571457	0.569503	0.366022	0.382613	0.572301	0.590695	0.646211	0.59479	0.44025	0.441772	0.565052	0.551284	0.595399	0.548929	0.652903	0.600057	0.648744	0.609416	0.862727	0.684646	0.614117	0.664626	0.626572	0.746558	0.760975	0.759779	0.830709	0.750465	0.777866	0.852435	0.776036	0.828739	0.603708	0.853219	0.875937	0.842177	0.866072
1689.64	1.03148	0.82277	1.02801	0.878999	0.84349	1.15814	0.52775	0.762646	0.70348	0.79035	0.571563	0.097487	0.70655	0.706875	0.458574	0.479149	0.715689	0.731853	0.800298	0.737241	0.536564	0.55596	0.70108	0.691041	0.74628	0.688858	0.816554	0.745804	0.804604	0.755756	1.00744	0.836936	0.75974	0.819937	0.771982	0.912457	0.935764	0.934866	1.00751	0.919881	0.949777	1.0432	0.950798	1.01544	0.75263	1.00881	1.0735	1.02646	1.06025
1691.57	1.2289	1.00523	1.27924	1.0957	1.06774	1.229	0.685633	0.960618	0.883058	1.00307	0.744224	0.144679	0.892484	0.894161	0.591271	0.626531	0.917078	0.933876	1.00888	0.941757	0.674487	0.70534	0.893648	0.885045	0.946138	0.88534	1.03276	0.953512	1.01437	0.963278	1.19073	1.04458	0.958894	1.0205	0.978643	1.13725	1.16735	1.17086	1.24519	1.15267	1.18266	1.29077	1.19017	1.26327	0.958303	1.23976	1.32737	1.2794	1.31105
1693.5	1.35036	1.1295	1.46711	1.25994	1.22948	1.20695	0.788743	1.10077	1.01274	1.15433	0.862941	0.168012	1.02157	1.02726	0.676638	0.728851	1.05278	1.07765	1.16023	1.09104	0.786684	0.816579	1.0447	1.0319	1.09276	1.02595	1.18639	1.10518	1.17928	1.11492	1.32339	1.22044	1.12656	1.18854	1.14957	1.31356	1.35647	1.35723	1.43405	1.34078	1.35472	1.47644	1.36741	1.4514	1.10107	1.42539	1.51441	1.46102	1.49939
1695.43	1.68877	1.42598	1.82619	1.58	1.5476	1.50673	1.01466	1.39465	1.25832	1.45552	1.11014	0.251116	1.30019	1.30726	0.885003	0.941737	1.33261	1.36511	1.46526	1.38113	1.00433	1.05417	1.31882	1.30661	1.38499	1.30335	1.49418	1.39847	1.497	1.39503	1.64395	1.52397	1.41851	1.49334	1.43823	1.62708	1.68554	1.68715	1.77371	1.65571	1.6846	1.83517	1.70834	1.80214	1.39258	1.73013	1.87946	1.814	1.86209
1697.36	1.94526	1.67479	2.15232	1.8629	1.83834	1.61354	1.21783	1.65642	1.49329	1.73462	1.3301	0.311754	1.54186	1.55061	1.06218	1.13981	1.59104	1.62224	1.73788	1.63958	1.18703	1.26502	1.57072	1.55967	1.64562	1.56012	1.7858	1.66867	1.77015	1.65847	1.90128	1.8051	1.68822	1.78014	1.71072	1.92842	1.99419	1.99765	2.09056	1.96491	1.97606	2.1591	2.01751	2.12464	1.65827	2.02533	2.20354	2.14487	2.18103
1699.29	2.34134	2.04724	2.57168	2.24225	2.21752	1.89208	1.50559	2.01469	1.80305	2.09806	1.63256	0.433948	1.88113	1.8899	1.32495	1.40559	1.93592	1.97296	2.10736	1.98459	1.44635	1.55023	1.90725	1.89275	1.98176	1.89433	2.1556	2.01702	2.1252	1.99272	2.25758	2.17042	2.04774	2.14814	2.06549	2.29852	2.38942	2.37801	2.49368	2.34234	2.37145	2.57944	2.41855	2.5307	2.01016	2.39643	2.63486	2.55646	2.60454
1701.22	2.91683	2.55323	3.16275	2.79019	2.74081	2.38042	1.91462	2.52222	2.22484	2.6119	2.06836	0.592882	2.36764	2.37306	1.69746	1.76809	2.44393	2.47417	2.63311	2.48573	1.82708	1.95951	2.3714	2.34601	2.47448	2.37083	2.66832	2.51781	2.64412	2.47686	2.77562	2.66072	2.53704	2.65287	2.55744	2.83519	2.93843	2.93128	3.05555	2.86771	2.93063	3.16895	2.99707	3.11552	2.51326	2.89329	3.23725	3.1393	3.21363
1703.14	3.31393	2.9524	3.65862	3.24996	3.19351	2.51195	2.27242	2.94185	2.63237	3.05593	2.44823	0.748512	2.77149	2.78067	2.01498	2.11908	2.87139	2.89585	3.07157	2.92238	2.16547	2.31073	2.78733	2.75537	2.91027	2.78891	3.11404	2.95691	3.09908	2.91949	3.15449	3.09485	2.96092	3.09351	2.9956	3.30757	3.41056	3.4161	3.517	3.34949	3.39669	3.66407	3.48401	3.61993	2.9415	3.38428	3.73175	3.63955	3.71557
1705.07	3.82629	3.4214	4.2185	3.75027	3.69117	2.88039	2.66902	3.41766	3.04802	3.54702	2.86666	0.923518	3.22904	3.23987	2.37405	2.48305	3.33857	3.36576	3.56537	3.39333	2.54414	2.71217	3.25121	3.21696	3.38915	3.2513	3.61765	3.43983	3.59311	3.38025	3.64029	3.59666	3.44828	3.59259	3.47578	3.82362	3.94474	3.95003	4.05855	3.86891	3.92528	4.21281	4.02422	4.16417	3.41874	3.87701	4.29809	4.18785	4.27165
1707	4.47932	4.0367	4.9328	4.41227	4.34829	3.33867	3.20386	4.03929	3.60963	4.19077	3.42344	1.18024	3.82824	3.83765	2.8597	2.97662	3.96113	3.98495	4.2077	4.01145	3.03504	3.236	3.83373	3.8039	3.99498	3.85576	4.27371	4.06732	4.23169	3.98632	4.24038	4.22275	4.06658	4.21424	4.09028	4.48091	4.61919	4.62609	4.74172	4.53264	4.61169	4.92272	4.71943	4.87901	4.04547	4.52847	5.02323	4.90461	4.99599
1708.93	5.04402	4.58405	5.56906	5.00871	4.94175	3.70205	3.68371	4.59961	4.12508	4.76815	3.92729	1.4062	4.36429	4.37379	3.29401	3.42705	4.52168	4.54124	4.78202	4.56926	3.49572	3.7253	4.37748	4.33923	4.55895	4.40188	4.86081	4.6355	4.80683	4.53927	4.79678	4.81121	4.63956	4.80135	4.66747	5.09459	5.24543	5.25421	5.36706	5.15241	5.22364	5.56486	5.34349	5.51807	4.6055	5.12338	5.66683	5.54118	5.64023
1710.86	5.69852	5.22151	6.30756	5.70012	5.62004	4.13847	4.24641	5.24916	4.73041	5.43772	4.51714	1.69029	4.98542	5.00169	3.8159	3.96346	5.17408	5.1911	5.4516	5.22339	4.03354	4.29266	5.0084	4.96704	5.21072	5.03731	5.53453	5.29766	5.45642	5.19487	5.43669	5.48423	5.28833	5.4754	5.32245	5.79121	5.95303	5.971	6.07961	5.85648	5.93045	6.30205	6.06445	6.25508	5.25981	5.81867	6.40919	6.27155	6.38283
1712.79	6.33139	5.84489	7.02276	6.36696	6.27881	4.56171	4.7891	5.87751	5.31536	6.08398	5.09075	1.96708	5.5894	5.6104	4.32299	4.49158	5.7988	5.81618	6.1025	5.86052	4.5646	4.85907	5.63844	5.58347	5.85144	5.65857	6.19474	5.94286	6.10927	5.83642	6.075	6.14739	5.94259	6.14874	5.97691	6.47248	6.65625	6.67679	6.78313	6.5508	6.61961	7.01763	6.7584	6.97072	5.89217	6.50344	7.12828	6.98539	7.10279
1714.72	7.09223	6.58357	7.85222	7.14015	7.06036	5.11218	5.43156	6.62212	5.99394	6.84322	5.77147	2.32919	6.30712	6.33427	4.93078	5.11638	6.52819	6.54793	6.86732	6.60956	5.1769	5.5181	6.37296	6.2881	6.587	6.38791	6.96853	6.6882	6.88941	6.5688	6.80766	6.8987	6.69981	6.91287	6.73395	7.24367	7.46289	7.46711	7.59069	7.33819	7.41373	7.85344	7.57318	7.79814	6.63822	7.28251	7.96983	7.81471	7.93113
1716.65	7.96925	7.40347	8.75552	7.98288	7.90174	5.84718	6.13631	7.44147	6.69834	7.67091	6.52232	2.74678	7.10018	7.13632	5.59976	5.76596	7.32521	7.35196	7.70324	7.41657	5.85615	6.24623	7.16338	7.06689	7.39101	7.17243	7.80629	7.49261	7.71953	7.32519	7.63348	7.72724	7.52347	7.74992	7.54344	8.07599	8.33962	8.31621	8.47203	8.16661	8.28227	8.74854	8.4652	8.67745	7.45307	8.0804	8.88211	8.69583	8.83223
1718.58	9.05249	8.41616	9.86887	9.03774	8.92945	6.77125	7.05128	8.45574	7.59448	8.70389	7.46507	3.30043	8.08794	8.11883	6.4464	6.57539	8.33909	8.36682	8.74012	8.41504	6.7119	7.1261	8.10198	8.03454	8.38871	8.14783	8.83019	8.50519	8.7227	8.26007	8.62282	8.71672	8.49918	8.74913	8.49968	9.10954	9.3793	9.36283	9.54157	9.18403	9.35662	9.83467	9.5529	9.76678	8.46846	9.07309	10.0037	9.78686	9.95472
1720.5	9.83079	9.18659	10.7335	9.88148	9.75699	7.29809	7.78647	9.24563	8.38677	9.52009	8.20445	3.71075	8.85778	8.88466	7.12023	7.28057	9.14565	9.16935	9.54674	9.20982	7.43021	7.84806	8.88634	8.83548	9.19578	8.93879	9.65289	9.32198	9.55012	9.0786	9.41451	9.55221	9.31667	9.58426	9.32735	9.9893	10.2402	10.2499	10.4112	10.0745	10.2052	10.71	10.4023	10.6515	9.26441	9.92776	10.8718	10.6602	10.8333
1722.43	10.6924	10.0335	11.6559	10.7682	10.6354	7.94799	8.56565	10.0968	9.20135	10.3889	9.00567	4.18994	9.68777	9.71547	7.85264	8.02778	9.99794	10.0229	10.4127	10.0657	8.18771	8.6331	9.72619	9.67056	10.045	9.78175	10.537	10.185	10.4338	9.92759	10.2594	10.4275	10.1815	10.4649	10.1975	10.8914	11.1493	11.1667	11.3244	10.9793	11.1075	11.6363	11.3125	11.5751	10.1176	10.8143	11.798	11.5817	11.7541
1724.36	11.6386	10.9686	12.6608	11.7224	11.5837	8.71509	9.41344	11.0217	10.0604	11.3293	9.87751	4.72871	10.5928	10.6219	8.64759	8.82189	10.9239	10.9462	11.3534	10.9952	9.01513	9.48654	10.6283	10.566	10.9731	10.6932	11.4946	11.1187	11.3727	10.8287	11.1854	11.3675	11.1146	11.4193	11.1209	11.8599	12.1288	12.1508	12.3151	11.9423	12.0865	12.6367	12.3013	12.5708	11.0434	11.7493	12.8048	12.5757	12.756
1726.29	12.5712	11.9015	13.6657	12.6928	12.5468	9.45276	10.2746	11.9531	10.9531	12.279	10.7576	5.2843	11.5047	11.5367	9.45586	9.64861	11.8559	11.8758	12.303	11.9308	9.85681	10.3476	11.5449	11.485	11.9068	11.6154	12.4551	12.0608	12.3204	11.7556	12.1152	12.3209	12.0542	12.3791	12.0586	12.8356	13.1073	13.1392	13.3002	12.9248	13.0697	13.6456	13.2928	13.5761	11.9767	12.7163	13.8131	13.5787	13.7636
1728.22	13.4962	12.8034	14.6491	13.6404	13.4862	10.2058	11.1108	12.8721	11.8149	13.2085	11.6267	5.84229	12.4009	12.4392	10.255	10.4586	12.7669	12.7872	13.2372	12.8443	10.6835	11.2087	12.459	12.3934	12.8313	12.5266	13.3915	12.9843	13.257	12.6592	13.0447	13.2662	12.9946	13.3285	12.9976	13.7851	14.0794	14.1076	14.2832	13.884	14.0327	14.6316	14.2654	14.5562	12.8939	13.658	14.8053	14.5554	14.7511
1730.15	14.5009	13.779	15.7165	14.659	14.5039	11.0254	12.0207	13.8666	12.756	14.2165	12.5752	6.47201	13.3723	13.4197	11.1385	11.351	13.7493	13.7763	14.2546	13.8413	11.5642	12.1395	13.4381	13.3731	13.8244	13.5132	14.4038	13.9866	14.2568	13.6426	14.0226	14.2589	13.9939	14.3249	13.9928	14.7913	15.1151	15.1355	15.3226	14.9021	15.0754	15.6996	15.3168	15.6182	13.8921	14.6811	15.8726	15.6141	15.8168
1732.08	15.3701	14.6309	16.6462	15.5467	15.414	11.7341	12.81	14.7381	13.5963	15.0939	13.4096	7.03968	14.2261	14.2847	11.9265	12.1604	14.5954	14.6313	15.1443	14.7203	12.3662	12.9902	14.3281	14.2362	14.7057	14.3744	15.3011	14.8605	15.1385	14.5156	14.9054	15.1621	14.8938	15.2254	14.8863	15.6783	16.0442	16.0388	16.2517	15.8244	15.9877	16.6262	16.2374	16.5449	14.7599	15.5869	16.7972	16.5376	16.7293
1734.01	16.6071	15.7931	17.8661	16.7047	16.5379	12.9686	13.8608	15.897	14.5068	16.2321	14.5224	7.88335	15.3532	15.4204	12.9423	13.0291	15.7229	15.7677	16.3152	15.8543	13.3972	14.0594	15.4093	15.2948	15.8125	15.4771	16.4557	15.9788	16.3003	15.4728	16.0425	16.2802	16.0165	16.3596	15.9335	16.7806	17.1911	17.1532	17.4321	16.8735	17.1534	17.8012	17.4302	17.6851	15.9053	16.5991	18.0122	17.6816	17.9311
1735.93	17.631	16.8286	18.9465	17.7751	17.5815	13.8013	14.8662	16.9208	15.5435	17.2929	15.5082	8.56491	16.3652	16.4205	13.8678	13.968	16.7775	16.8106	17.3495	16.8854	14.3617	15.0077	16.4029	16.3301	16.8537	16.5002	17.5001	17.0271	17.3244	16.5028	17.0634	17.3325	17.0424	17.4086	16.98	17.8913	18.2464	18.2547	18.4949	17.9543	18.2228	18.8881	18.4916	18.7857	16.9317	17.6629	19.0929	18.765	19.0101
1737.86	18.4795	17.6914	19.8515	18.6752	18.4801	14.456	15.6965	17.7842	16.4528	18.1778	16.3427	9.14721	17.2255	17.2792	14.6609	14.8269	17.6459	17.6775	18.2177	17.7587	15.1791	15.8347	17.2869	17.2062	17.7379	17.3722	18.3828	17.9089	18.1825	17.4133	17.9261	18.2359	17.927	18.3054	17.8936	18.8007	19.1574	19.1672	19.3929	18.8858	19.1269	19.8069	19.392	19.7129	17.7919	18.5985	19.9954	19.6831	19.9172
1739.79	19.5061	18.6913	20.8957	19.6836	19.4687	15.4089	16.6288	18.7856	17.335	19.1746	17.3134	9.87872	18.2072	18.2647	15.5596	15.6688	18.6348	18.6713	19.2212	18.7452	16.1121	16.7914	18.2597	18.1719	18.7215	18.3491	19.3897	18.9	19.1801	18.3272	18.9185	19.2391	18.9283	19.322	18.8575	19.7945	20.1801	20.1693	20.421	19.8499	20.1462	20.8361	20.4235	20.7258	18.7815	19.5396	21.0336	20.6919	20.9449
1741.72	20.5044	19.6949	21.9336	20.6872	20.4803	16.2768	17.5794	19.779	18.2984	20.1846	18.2815	10.6068	19.1883	19.2429	16.4793	16.5864	19.6292	19.6663	20.2265	19.7411	17.0516	17.7426	19.2376	19.1603	19.7125	19.3317	20.4011	19.8961	20.1904	19.3033	19.8977	20.235	19.9185	20.3222	19.845	20.8079	21.2003	21.187	21.4477	20.8558	21.1735	21.8752	21.4491	21.7631	19.7781	20.5441	22.0721	21.7228	21.9713
1743.65	21.441	20.6231	22.9026	21.6351	21.4223	17.1113	18.4667	20.7118	19.1769	21.1272	19.1922	11.2986	20.1077	20.1623	17.3366	17.4287	20.5555	20.5918	21.1681	20.6728	17.9275	18.6459	20.162	20.0862	20.6445	20.2588	21.3444	20.8273	21.123	20.209	20.8326	21.1811	20.8545	21.2666	20.784	21.7595	22.1611	22.1441	22.4097	21.7982	22.1301	22.848	22.4109	22.7245	20.7155	21.4751	23.0424	22.6761	22.9348
1745.58	22.4041	21.5734	23.905	22.6316	22.4148	17.9494	19.3911	21.6783	20.1299	22.1074	20.1351	12.0207	21.0613	21.1219	18.2437	18.3471	21.5197	21.5535	22.1472	21.6444	18.8295	19.5865	21.1275	21.0504	21.6001	21.2247	22.3197	21.8013	22.0946	21.178	21.7949	22.1592	21.8243	22.2421	21.7549	22.7374	23.1493	23.133	23.398	22.7811	23.1349	23.8621	23.413	23.7372	21.6893	22.4699	24.0485	23.6865	23.9383
1747.51	23.3051	22.4478	24.836	23.5389	23.3266	18.7703	20.2368	22.5806	20.9743	23.0067	21.016	12.7148	21.9456	22.0222	19.0905	19.1813	22.4064	22.44	23.0595	22.5478	19.6885	20.4843	22.0479	21.9474	22.5078	22.1252	23.2325	22.7086	23.0132	22.0593	22.7132	23.081	22.7568	23.1606	22.659	23.6384	24.091	24.0492	24.3434	23.6901	24.0722	24.8015	24.3521	24.6715	22.5925	23.3807	24.9918	24.6184	24.8779
1749.44	24.2536	23.377	25.7872	24.467	24.247	19.6694	21.1204	23.5087	21.8123	23.9325	21.9332	13.4699	22.8561	22.9423	19.9593	19.9998	23.3223	23.3656	24	23.4752	20.5763	21.3822	22.9727	22.8507	23.4437	23.041	24.1701	23.6313	23.9466	22.9216	23.6394	24.012	23.6942	24.0978	23.5742	24.5561	25.0328	24.9749	25.2981	24.6085	25.0251	25.7509	25.3081	25.6172	23.5264	24.2691	25.9554	25.5556	25.8382
1751.36	25.1935	24.3162	26.7149	25.3908	25.1281	20.5909	22.0125	24.4138	22.6092	24.8384	22.8349	14.2194	23.7499	23.8298	20.7906	20.749	24.246	24.2917	24.9197	24.3748	21.4719	22.2638	23.8395	23.7323	24.3641	23.9345	25.0891	24.539	24.8466	23.728	24.5611	24.9452	24.6161	25.044	24.4638	25.5054	25.9556	25.915	26.2416	25.4968	25.9531	26.6748	26.2309	26.5278	24.4443	25.1051	26.8941	26.4545	26.7738
1753.29	26.0937	25.2431	27.6443	26.3343	26.0698	21.3556	22.9344	25.3183	23.5895	25.775	23.7291	14.9238	24.657	24.7237	21.659	21.6678	25.1843	25.2228	25.8405	25.3002	22.3726	23.1406	24.7354	24.6667	25.3035	24.8548	26.0218	25.4781	25.779	24.6876	25.4751	25.8897	25.5363	25.9895	25.3984	26.4957	26.8927	26.8892	27.178	26.4745	26.8954	27.6282	27.1697	27.5012	25.366	26.0837	27.8363	27.4154	27.7277
1755.22	26.8832	26.0311	28.4627	27.142	26.8848	22.0634	23.7104	26.1181	24.4053	26.5793	24.5197	15.5613	25.4536	25.5228	22.4243	22.4668	25.9839	26.0275	26.6485	26.1118	23.1625	23.9433	25.5653	25.4889	26.1254	25.665	26.8351	26.2921	26.6071	25.5148	26.3005	26.7272	26.3677	26.8287	26.2267	27.324	27.7318	27.7156	28.0129	27.3225	27.7211	28.4625	28.0041	28.3381	26.1732	26.918	28.6617	28.2487	28.5562
1757.15	27.785	26.9186	29.3705	28.0363	27.7562	22.9385	24.5669	27.0069	25.1914	27.4572	25.4012	16.3129	26.327	26.4026	23.2609	23.2314	26.8724	26.9199	27.5445	26.9965	24.0173	24.8143	26.4378	26.3663	27.0079	26.5504	27.7335	27.1848	27.4903	26.3314	27.1933	27.6193	27.2596	27.7231	27.0911	28.21	28.6235	28.604	28.9138	28.1854	28.6299	29.3705	28.9157	29.2316	27.0705	27.765	29.582	29.148	29.4751
1759.08	28.5891	27.7371	30.1956	28.8706	28.5978	23.6509	25.3747	27.8197	26.0452	28.2869	26.2037	16.9744	27.1362	27.2145	24.0536	24.0626	27.6956	27.7382	28.3678	27.8191	24.819	25.6167	27.2717	27.196	27.8385	27.3732	28.5703	28.0174	28.3107	27.1851	28.0212	28.4617	28.0962	28.5613	27.9479	29.0625	29.4647	29.4606	29.7548	29.0518	29.4769	30.2208	29.749	30.0919	27.8911	28.626	30.4181	30.0074	30.3212
1761.01	29.369	28.4996	30.9747	29.6339	29.3455	24.4215	26.1088	28.5906	26.7297	29.0514	26.9775	17.6551	27.8982	27.9851	24.7798	24.7392	28.4536	28.5038	29.1471	28.5853	25.5756	26.3945	28.048	27.9414	28.6036	28.1382	29.3481	28.7797	29.0934	27.8962	28.802	29.2478	28.8946	29.351	28.7052	29.8209	30.2585	30.2266	30.5537	29.8053	30.2635	30.9985	30.5416	30.8562	28.6682	29.3517	31.2021	30.772	31.1048
1762.94	30.1863	29.3133	31.7902	30.4471	30.1228	25.2246	26.9078	29.3917	27.4557	29.8539	27.784	18.3593	28.6895	28.7697	25.535	25.4213	29.2666	29.3212	29.9571	29.3865	26.379	27.1834	28.8227	28.7349	29.405	28.9378	30.1597	29.5897	29.9062	28.6301	29.6164	30.0647	29.7037	30.1749	29.4767	30.6531	31.0731	31.0556	31.3828	30.5969	31.081	31.807	31.3607	31.6537	29.4836	30.1056	32.0277	31.5682	31.9193
1764.87	30.9416	30.0975	32.5763	31.2495	30.9437	25.8754	27.6971	30.1622	28.3277	30.647	28.5483	18.9938	29.4628	29.5349	26.303	26.2623	30.0578	30.1111	30.7438	30.1789	27.1469	27.94	29.6089	29.5328	30.1983	29.7286	30.9552	30.3913	30.688	29.4791	30.3951	30.8521	30.4757	30.9669	30.2893	31.4752	31.8635	31.8746	32.1786	31.4331	31.8843	32.6158	32.1513	32.4783	30.2679	30.953	32.8185	32.388	32.7156
1766.8	31.6532	30.8054	33.3057	31.9546	31.6714	26.557	28.3812	30.88	29.008	31.3538	29.2622	19.618	30.1753	30.2587	26.9962	26.9514	30.7624	30.8204	31.4732	30.9041	27.8439	28.6767	30.3442	30.2458	30.9234	30.4526	31.6859	31.1114	31.407	30.1864	31.1259	31.5757	31.2137	31.6937	31.0067	32.1764	32.5995	32.5855	32.9116	32.1393	32.6195	33.3517	32.8871	33.2053	30.9844	31.6657	33.5479	33.1147	33.4528
1768.72	32.4162	31.5653	34.0876	32.7211	32.4466	27.2898	29.1189	31.6494	29.7297	32.1181	30.0263	20.2962	30.9397	31.0365	27.7411	27.6758	31.5148	31.5761	32.2507	31.6771	28.576	29.453	31.1195	31.0231	31.686	31.2281	32.4589	31.8863	32.1737	30.9349	31.892	32.3421	31.9911	32.4596	31.755	32.9197	33.3747	33.3425	33.6807	32.8905	33.4049	34.1377	33.6784	33.9854	31.7545	32.4353	34.3419	33.8968	34.2447
1770.65	33.0631	32.1832	34.7486	33.3716	33.0989	27.924	29.7234	32.2996	30.3377	32.757	30.6737	20.8848	31.5863	31.7045	28.3725	28.3122	32.1315	32.1992	32.9026	32.325	29.2063	30.1298	31.8128	31.6794	32.3442	31.8804	33.1002	32.526	32.83	31.5691	32.5608	33.0153	32.6717	33.1309	32.417	33.5365	34.0523	33.9774	34.3532	33.5395	34.0725	34.7984	34.3526	34.6384	32.4017	33.0848	35.0064	34.5488	34.9033
1772.58	33.7296	32.818	35.3944	33.979	33.6617	28.6635	30.3338	32.9387	30.7742	33.3667	31.3248	21.521	32.2051	32.3276	28.9556	28.7223	32.7675	32.8361	33.5388	32.948	29.8436	30.7708	32.4062	32.2757	32.9744	32.4965	33.7248	33.1421	33.464	32.0293	33.2008	33.6504	33.3193	33.7767	32.9917	34.1493	34.6806	34.5852	35.0105	34.0942	34.7047	35.4098	34.9914	35.222	33.0428	33.5836	35.6448	35.125	35.5294
1774.51	34.3831	33.5058	36.0477	34.6647	34.3321	29.2654	31.0344	33.5927	31.4935	34.0415	31.9814	22.0946	32.8619	32.9625	29.6023	29.3777	33.4613	33.5235	34.1964	33.6116	30.5361	31.4059	33.0379	32.9432	33.646	33.1524	34.3994	33.819	34.1176	32.6989	33.8611	34.3324	33.9778	34.4543	33.6608	34.8847	35.3402	35.2957	35.6917	34.815	35.3744	36.0682	35.6424	35.9024	33.7077	34.2529	36.3032	35.7967	36.1875
1776.44	35.012	34.1699	36.6877	35.3308	35.0018	29.8366	31.7009	34.2304	32.2006	34.6946	32.6184	22.6505	33.5048	33.5945	30.2386	30.0569	34.1186	34.1797	34.8416	34.2591	31.1895	32.0255	33.6732	33.5901	34.3121	33.7996	35.0565	34.474	34.7577	33.3795	34.5035	34.9882	34.6142	35.1018	34.3077	35.5678	35.9892	35.9714	36.3414	35.5002	36.0297	36.7214	36.2872	36.572	34.3526	34.9276	36.9451	36.4577	36.8332
1778.37	35.6109	34.7848	37.3013	35.941	35.6211	30.4008	32.3066	34.8378	32.8367	35.3054	33.222	23.1956	34.1129	34.2049	30.8471	30.6906	34.7247	34.7848	35.453	34.8691	31.7982	32.6386	34.2963	34.2015	34.9383	34.411	35.6671	35.0885	35.3783	34.0107	35.1234	35.6089	35.2278	35.719	34.9332	36.1846	36.6086	36.5912	36.9566	36.1309	36.6595	37.3419	36.9105	37.199	34.9637	35.5637	37.5589	37.085	37.4467
1780.3	36.1895	35.3499	37.8767	36.5017	36.1546	30.9905	32.8605	35.4101	33.3269	35.8596	33.796	23.7439	34.6751	34.7727	31.3914	31.1753	35.2847	35.353	36.0236	35.4308	32.3659	33.2249	34.858	34.7589	35.5006	34.9777	36.2294	35.6526	35.9343	34.5165	35.6971	36.1844	35.8087	36.298	35.4827	36.739	37.1768	37.1487	37.5279	36.6702	37.238	37.9103	37.4875	37.7487	35.5359	36.0816	38.136	37.6358	38.0137
1782.23	36.7558	35.9252	38.4449	37.0875	36.7314	31.5312	33.4428	35.9789	33.9218	36.4341	34.364	24.2679	35.2459	35.3387	31.9535	31.7412	35.8649	35.9335	36.5929	36.0054	32.9492	33.7938	35.434	35.3467	36.0821	35.5458	36.8092	36.2302	36.4927	35.0856	36.2741	36.7701	36.391	36.887	36.0533	37.334	37.7531	37.7405	38.1	37.264	37.8171	38.4872	38.0643	38.3307	36.1092	36.653	38.7102	38.2127	38.5814
1784.15	37.2758	36.4482	38.966	37.6059	37.2546	32.0514	33.9624	36.5028	34.4225	36.9515	34.8861	24.7638	35.7664	35.859	32.462	32.2289	36.3855	36.4569	37.1197	36.5309	33.4811	34.3186	35.9588	35.8729	36.6071	36.0609	37.3419	36.751	37.0362	35.5773	36.8109	37.3071	36.9224	37.429	36.5674	37.8577	38.2816	38.2669	38.6356	37.7785	38.3457	39.0056	38.5897	38.8533	36.6312	37.1513	39.2349	38.7323	39.1053
1786.08	37.8097	36.9962	39.508	38.1409	37.7798	32.5847	34.5066	37.0409	34.9262	37.4873	35.4218	25.2656	36.2961	36.3867	32.9818	32.7114	36.9299	37.0026	37.6647	37.0698	34.031	34.8547	36.4804	36.4139	37.1392	36.6008	37.8845	37.2928	37.5796	36.0828	37.3564	37.8559	37.4636	37.9736	37.0958	38.4101	38.8201	38.8198	39.1862	38.31	38.8911	39.5445	39.128	39.3885	37.1682	37.6651	39.7768	39.2638	39.6474
1788.01	38.373	37.5837	40.0955	38.741	38.3849	33.0946	35.0949	37.6213	35.5874	38.0821	35.9929	25.779	36.8807	36.9727	33.576	33.3745	37.5165	37.5853	38.2557	37.6655	34.5899	35.4302	37.0743	37.0062	37.7232	37.1989	38.4684	37.8882	38.1316	36.7333	37.9295	38.4324	38.0327	38.5381	37.6959	38.992	39.3974	39.4063	39.7613	38.922	39.4924	40.1492	39.7211	40.0081	37.7512	38.3123	40.3596	39.8768	40.2441
1789.94	38.8508	38.0459	40.6014	39.2261	38.8948	33.5671	35.5444	38.1215	36.0815	38.5677	36.482	26.2468	37.3747	37.4902	34.0771	33.9061	37.9782	38.0533	38.7583	38.1697	35.0494	35.9614	37.6149	37.4998	38.2193	37.7057	38.9545	38.3806	38.6138	37.2476	38.4325	38.9227	38.5354	39.0224	38.2018	39.43	39.9008	39.8635	40.2553	39.4045	40.0056	40.657	40.2352	40.517	38.246	38.8325	40.8571	40.3864	40.7437
1791.87	39.2558	38.4102	40.9916	39.5697	39.2214	34.0535	35.8809	38.516	36.2563	38.9159	36.8807	26.6897	37.7449	37.8795	34.4216	34.09	38.3358	38.422	39.1498	38.5472	35.4358	36.389	37.9879	37.8496	38.5893	38.08	39.3287	38.7427	39.0233	37.4718	38.8277	39.3081	38.9454	39.4206	38.5264	39.756	40.2859	40.1985	40.6497	39.689	40.3776	41.0237	40.6267	40.8455	38.6324	39.0858	41.246	40.7112	41.1225
1793.8	39.7078	38.883	41.4321	40.0209	39.6523	34.507	36.3582	38.9578	36.681	39.3656	37.3298	27.1225	38.1879	38.3054	34.8527	34.4652	38.8084	38.8925	39.5898	38.9875	35.923	36.8154	38.4022	38.3046	39.0439	38.5172	39.7865	39.1935	39.4763	37.8716	39.2797	39.7649	39.3974	39.8895	38.9577	40.2491	40.7304	40.6752	41.1079	40.139	40.8243	41.4666	41.0672	41.2913	39.0776	39.4899	41.6928	41.1429	41.5634
1795.73	40.1725	39.3816	41.9107	40.5202	40.1496	34.9282	36.8736	39.4346	37.2594	39.8623	37.8047	27.5478	38.6699	38.7767	35.3409	35.024	39.3081	39.3836	40.0649	39.4693	36.4188	37.2778	38.89	38.81	39.5408	39.0005	40.2734	39.6857	39.9397	38.4119	39.7586	40.2567	39.8684	40.3783	39.4641	40.7691	41.2067	41.1824	41.5909	40.674	41.3211	41.9611	41.543	41.8029	39.5568	40.0175	42.1758	41.6508	42.0439
1797.66	40.6013	39.8203	42.3512	40.9679	40.5906	35.3399	37.3181	39.8762	37.7299	40.3063	38.2427	27.9588	39.1106	39.2225	35.7854	35.4978	39.7488	39.8216	40.5058	39.9122	36.8545	37.7306	39.3453	39.2555	39.9863	39.4484	40.7126	40.1313	40.3855	38.8767	40.2017	40.7052	40.3075	40.8232	39.9082	41.2074	41.6481	41.6233	42.0311	41.128	41.7689	42.4147	41.9855	42.2579	39.997	40.4828	42.6211	42.1041	42.493
1799.59	40.9768	40.1893	42.727	41.335	40.9571	35.7339	37.6732	40.2579	38.0621	40.6744	38.6245	28.3456	39.4872	39.6077	36.1564	35.8379	40.1124	40.1921	40.884	40.2899	37.2386	38.1292	39.7347	39.6264	40.3659	39.8263	41.0868	40.5039	40.7731	39.2205	40.5845	41.0828	40.7012	41.2031	40.2812	41.557	42.0308	41.9817	42.4055	41.4772	42.1482	42.7888	42.3691	42.6242	40.3783	40.829	42.9941	42.4715	42.8699
1801.51	41.3218	40.5349	43.0582	41.6549	41.2696	36.1083	38.0144	40.594	38.3169	40.9994	38.9671	28.6989	39.8133	39.9288	36.4693	36.0715	40.4498	40.5335	41.2126	40.6162	37.6077	38.479	40.0548	39.9575	40.7183	40.1556	41.4251	40.8379	41.0919	39.4753	40.9379	41.4332	41.0623	41.5562	40.6123	41.9101	42.3696	42.3286	42.7599	41.7839	42.4772	43.1153	42.7035	42.9432	40.7186	41.0983	43.3215	42.7764	43.195
1803.44	41.7101	40.9447	43.4474	42.053	41.6601	36.4788	38.4447	40.9775	38.7447	41.4024	39.3586	29.0702	40.2027	40.3077	36.8567	36.4716	40.8622	40.9403	41.5976	41.0038	38.0178	38.8558	40.4279	40.3531	41.1165	40.5424	41.823	41.2342	41.4817	39.8711	41.3282	41.8346	41.4435	41.96	41.0032	42.3392	42.7472	42.743	43.1456	42.1916	42.8747	43.5052	43.0857	43.3446	41.107	41.4989	43.7071	43.1685	43.5734
1805.37	42.0862	41.3415	43.8309	42.4458	42.0437	36.8389	38.8473	41.3577	39.1654	41.7967	39.7395	29.4276	40.587	40.6894	37.244	36.888	41.2583	41.3307	41.9821	41.3906	38.4099	39.2319	40.8139	40.7471	41.503	40.9269	42.2125	41.6223	41.8834	40.2795	41.7159	42.2277	41.8232	42.3527	41.3908	42.7371	43.1243	43.1355	43.5232	42.589	43.2682	43.8975	43.4641	43.7443	41.4893	41.9025	44.0866	43.5617	43.9557
1807.3	42.4528	41.7161	44.2025	42.8237	42.4211	37.1969	39.2134	41.7329	39.5451	42.1697	40.1098	29.7856	40.958	41.0671	37.6227	37.2791	41.6249	41.6957	42.3593	41.7705	38.7762	39.6088	41.198	41.1244	41.8668	41.3008	42.581	41.9955	42.2433	40.6619	42.0856	42.5971	42.1999	42.7175	41.7706	43.0924	43.4918	43.4952	43.8909	42.9501	43.6471	44.2824	43.838	44.1303	41.8612	42.286	44.4586	43.9422	44.3317
1809.23	42.7637	42.0187	44.5192	43.1299	42.734	37.5214	39.507	42.0547	39.8183	42.4797	40.4332	30.1098	41.2693	41.3866	37.9391	37.5655	41.9251	42.0016	42.6823	42.0884	39.0919	39.9489	41.5233	41.441	42.1728	41.617	42.8928	42.3057	42.5362	40.9536	42.4113	42.9154	42.5288	43.0367	42.083	43.3854	43.8144	43.7916	44.2118	43.2415	43.9641	44.5991	44.1554	44.4424	42.1766	42.5781	44.7778	44.2498	44.6454
1811.16	43.0463	42.2905	44.7949	43.3965	42.9894	37.8307	39.7807	42.3314	40.0361	42.755	40.7237	30.4089	41.5439	41.6596	38.2046	37.7729	42.2027	42.2847	42.9625	42.3586	39.391	40.2431	41.7924	41.7168	42.4601	41.8932	43.1718	42.5779	42.8233	41.1739	42.7011	43.2038	42.8197	43.3345	42.3467	43.6674	44.0956	44.0619	44.5041	43.4996	44.2361	44.8711	44.4289	44.7029	42.4553	42.8047	45.0528	44.5	44.9202
1813.09	43.3558	42.6166	45.099	43.7146	43.2968	38.1369	40.1211	42.634	40.3717	43.0712	41.0363	30.7039	41.8543	41.9593	38.507	38.0782	42.526	42.6113	43.2632	42.6625	39.7292	40.5401	42.0928	42.0405	42.786	42.1997	43.4849	42.8909	43.141	41.4763	43.0158	43.5295	43.1296	43.6596	42.6617	44.0131	44.3988	44.3922	44.8163	43.8267	44.5412	45.1798	44.7272	45.0175	42.7633	43.1144	45.3559	44.8058	45.223
1815.02	43.6692	42.943	45.4079	44.0388	43.6208	38.4339	40.4537	42.9455	40.7324	43.3922	41.3534	31.0049	42.1717	42.2736	38.8236	38.4324	42.8484	42.9321	43.5694	42.9759	40.0507	40.8459	42.4087	42.3574	43.0972	42.5145	43.7994	43.209	43.446	41.8136	43.3286	43.847	43.4399	43.9689	42.9876	44.3309	44.7025	44.7079	45.119	44.1474	44.8608	45.4985	45.0389	45.3431	43.0796	43.4499	45.6683	45.1335	45.5336
1816.94	43.9325	43.2087	45.6683	44.2924	43.8747	38.708	40.7142	43.2078	40.9568	43.6514	41.6266	31.2775	42.43	42.5347	39.0788	38.6546	43.1106	43.1956	43.8367	43.2408	40.322	41.1276	42.6736	42.6141	43.36	42.7803	44.0589	43.4747	43.6993	42.0516	43.6044	44.1173	43.7089	44.238	43.2523	44.5906	44.9643	44.9723	45.384	44.3837	45.1214	45.7627	45.3039	45.5961	43.3441	43.6877	45.9284	45.3861	45.7959
1818.87	44.2062	43.4932	45.9467	44.5722	44.1566	38.9837	41.0033	43.4866	41.2302	43.9354	41.9105	31.557	42.7072	42.8094	39.3625	38.9254	43.3929	43.4767	44.1187	43.5238	40.6039	41.4143	42.9524	42.8945	43.6448	43.06	44.3439	43.757	43.9798	42.3266	43.8838	44.3985	43.9817	44.5246	43.5313	44.8743	45.2385	45.2507	45.6583	44.6546	45.398	46.0408	45.5791	45.8764	43.6245	43.9594	46.2018	45.6602	46.0751
1820.8	44.5005	43.7946	46.2444	44.8781	44.4633	39.2652	41.3102	43.7833	41.5443	44.2372	42.2079	31.8391	43.0068	43.1087	39.6661	39.2455	43.6871	43.7702	44.4152	43.8214	40.8969	41.7169	43.2546	43.2047	43.939	43.3634	44.6522	44.0596	44.2799	42.6406	44.1816	44.6966	44.2784	44.8162	43.8288	45.1688	45.5336	45.5444	45.9503	44.9529	45.7018	46.3502	45.8765	46.1838	43.9235	44.2704	46.5027	45.9652	46.3737
1822.73	44.7692	44.0549	46.5188	45.1484	44.7547	39.5298	41.5719	44.0562	41.8465	44.5149	42.4887	32.1124	43.2839	43.3985	39.9516	39.5748	43.9439	44.0312	44.6895	44.0988	41.1543	42.006	43.5586	43.4878	44.2101	43.649	44.927	44.3332	44.5578	42.9436	44.454	44.9657	44.5611	45.0808	44.1225	45.4109	45.8087	45.7959	46.2087	45.2228	45.9918	46.641	46.1618	46.4682	44.1997	44.5819	46.7805	46.251	46.6452
1824.66	44.9517	44.2149	46.7016	45.3054	44.8965	39.7664	41.721	44.2344	41.8999	44.6758	42.6891	32.3287	43.4532	43.5816	40.1028	39.6401	44.1039	44.2018	44.8738	44.2701	41.339	42.2223	43.7389	43.6526	44.4108	43.8298	45.0952	44.4999	44.7273	43.0385	44.6509	45.15	44.7673	45.2761	44.2725	45.5593	45.998	45.9504	46.3938	45.3405	46.1657	46.813	46.3449	46.6176	44.3797	44.6864	46.9584	46.3851	46.8215
1826.59	45.2301	44.5064	46.9855	45.6063	45.2051	40.0259	42.0157	44.5185	42.2313	44.9732	42.9798	32.5998	43.7416	43.8689	40.4059	39.9628	44.391	44.4865	45.1628	44.5636	41.6186	42.5031	44.0275	43.946	44.6942	44.115	45.3763	44.7933	45.0066	43.3536	44.9256	45.4254	45.0392	45.552	44.5546	45.848	46.2731	46.2323	46.664	45.633	46.4582	47.1092	46.6266	46.9241	44.6661	44.9992	47.241	46.6908	47.1131
1828.52	45.4073	44.6683	47.1676	45.7752	45.3887	40.2205	42.1686	44.7053	42.3971	45.1464	43.1694	32.7962	43.9245	44.0695	40.5937	40.1576	44.5515	44.6499	45.3508	44.7506	41.7991	42.7142	44.2428	44.1225	44.8686	44.2953	45.5547	44.9614	45.1882	43.5306	45.1216	45.6156	45.2396	45.7384	44.7545	45.9988	46.4681	46.3918	46.8528	45.8008	46.6437	47.2843	46.8131	47.0961	44.8466	45.1804	47.4202	46.8742	47.2834
1830.45	45.5156	44.7724	47.2571	45.8543	45.4258	40.3918	42.271	44.8015	42.353	45.2279	43.2906	32.9437	44.0104	44.1545	40.6517	40.0806	44.6585	44.7617	45.4405	44.8315	41.9411	42.8326	44.3068	44.2029	44.9719	44.3832	45.6525	45.0476	45.2803	43.5017	45.24	45.7347	45.3593	45.8592	44.8193	46.1173	46.5694	46.4965	46.9687	45.8537	46.7241	47.3533	46.9043	47.1487	44.9466	45.1695	47.5088	46.9105	47.3625
1832.38	45.7538	45.0508	47.482	46.1277	45.6854	40.5951	42.5702	45.0343	42.7064	45.4922	43.5352	33.1562	44.2541	44.3751	40.9059	40.388	44.9355	45.0308	45.6689	45.071	42.2161	43.0422	44.5266	44.4681	45.2214	44.621	45.8989	45.3067	45.527	43.7916	45.4756	45.9896	45.5877	46.1113	45.08	46.4267	46.7928	46.7761	47.1935	46.1529	46.9703	47.6003	47.1298	47.4218	45.1876	45.4521	47.7417	47.172	47.6012
1834.3	45.9658	45.2791	47.6967	46.3554	45.9209	40.7898	42.8035	45.2473	42.9792	45.7165	43.7566	33.361	44.4747	44.5913	41.1352	40.6577	45.1597	45.2513	45.8846	45.2893	42.4357	43.249	44.7468	44.6949	45.4415	44.8398	46.1155	45.5298	45.756	44.0418	45.6951	46.214	45.8006	46.3273	45.3085	46.6528	47.0004	46.9998	47.3975	46.3872	47.1926	47.8233	47.3407	47.6494	45.402	45.6933	47.9524	47.3993	47.8169
1836.23	46.1286	45.4418	47.865	46.5193	46.0838	40.9699	42.9669	45.4122	43.1247	45.8776	43.9297	33.5358	44.6384	44.7574	41.3017	40.8057	45.3206	45.417	46.0528	45.4571	42.611	43.4287	44.9229	44.8687	45.609	45.0074	46.2816	45.6969	45.9259	44.1914	45.8703	46.3914	45.9728	46.4958	45.4762	46.8128	47.1668	47.1653	47.5605	46.5475	47.3596	47.9883	47.5081	47.8062	45.5663	45.8416	48.112	47.5492	47.979
1838.16	46.2989	45.6091	48.0276	46.6914	46.2409	41.1518	43.1445	45.577	43.2734	46.0442	44.106	33.7085	44.8037	44.918	41.4623	40.9455	45.4915	45.5913	46.2199	45.6272	42.7899	43.6026	45.091	45.0396	45.7702	45.1793	46.4534	45.8681	46.0803	44.3416	46.0401	46.5629	46.1375	46.6668	45.6355	46.9831	47.3333	47.3343	47.7232	46.7048	47.5284	48.1533	47.6753	47.966	45.7389	45.9961	48.2803	47.7078	48.147
1840.09	46.5433	45.8608	48.2729	46.9485	46.5218	41.3653	43.4101	45.8264	43.6003	46.3077	44.3576	33.9336	45.0598	45.1707	41.7268	41.2763	45.7441	45.8421	46.4729	45.8862	43.0285	43.8509	45.3576	45.3043	46.0228	45.4435	46.7058	46.1326	46.3279	44.655	46.286	46.8055	46.3754	46.9036	45.8989	47.235	47.5749	47.5872	47.9605	46.9774	47.7935	48.4179	47.9299	48.2371	45.9952	46.3043	48.5322	47.9912	48.4051
1842.02	46.7106	46.0201	48.4543	47.1179	46.7289	41.5302	43.5541	46.0054	43.8048	46.4809	44.5394	34.1193	45.2388	45.3724	41.9208	41.5281	45.8893	45.9917	46.6631	46.0716	43.1703	44.065	45.5834	45.4836	46.2065	45.63	46.8734	46.3042	46.5161	44.8752	46.4612	46.9677	46.5584	47.065	46.0999	47.3523	47.7553	47.7243	48.1263	47.1468	47.9829	48.6075	48.1202	48.4231	46.1735	46.5218	48.705	48.185	48.5833
1843.95	46.7062	45.9859	48.4466	47.0782	46.6554	41.6226	43.4906	45.9978	43.5593	46.4264	44.5464	34.1788	45.2101	45.3663	41.8615	41.2947	45.8429	45.9601	46.6603	46.0462	43.1656	44.1032	45.5605	45.4305	46.1937	45.6063	46.8517	46.2625	46.4914	44.6936	46.4759	46.9673	46.5798	47.0698	46.0339	47.289	47.7665	47.6733	48.1417	47.0294	47.9546	48.5636	48.1114	48.3508	46.1585	46.3633	48.687	48.0974	48.5499
1845.88	46.8271	46.121	48.5539	47.2034	46.7635	41.7546	43.64	46.1082	43.6742	46.551	44.6672	34.2998	45.3214	45.4647	41.975	41.3673	45.9825	46.093	46.7689	46.1571	43.3244	44.2008	45.6427	45.5588	46.3148	45.7177	46.9756	46.3836	46.5976	44.7801	46.5962	47.0928	46.6959	47.1948	46.1318	47.4544	47.8794	47.8201	48.2682	47.1639	48.0692	48.6689	48.2191	48.4658	46.2767	46.4569	48.7964	48.1987	48.6528
1847.81	46.9742	46.2761	48.6938	47.3618	46.9201	41.8793	43.8242	46.2501	43.9115	46.7145	44.8206	34.4309	45.47	45.598	42.1347	41.578	46.1494	46.2548	46.9059	46.3036	43.5023	44.3351	45.7916	45.733	46.4819	45.8647	47.1299	46.5391	46.757	44.9715	46.7512	47.2605	46.8461	47.3622	46.3017	47.6544	48.029	47.999	48.4158	47.3707	48.2289	48.8206	48.3556	48.6246	46.4216	46.6407	48.9381	48.354	48.7949
1849.73	47.1002	46.4084	48.8079	47.4986	47.04	41.9972	43.969	46.3703	44.067	46.8416	44.9512	34.5536	45.5954	45.7106	42.2584	41.7104	46.2823	46.3878	47.0191	46.4231	43.641	44.4492	45.9052	45.8613	46.6154	45.9843	47.2515	46.6617	46.8807	45.0973	46.873	47.3941	46.9684	47.4981	46.4235	47.8044	48.1501	48.1321	48.5363	47.5153	48.3535	48.9412	48.4693	48.7498	46.5454	46.765	49.0536	48.4765	48.9125
1851.66	47.2188	46.5413	48.9239	47.6349	47.1771	42.1146	44.1054	46.4923	44.2258	46.9653	45.0749	34.6706	45.7219	45.8332	42.3888	41.8639	46.4095	46.5156	47.1366	46.5456	43.7801	44.5705	46.0256	45.9827	46.7386	46.1087	47.3741	46.7854	46.9934	45.2347	46.9984	47.5277	47.0933	47.6211	46.559	47.942	48.2736	48.2668	48.6679	47.6617	48.4808	49.0662	48.5918	48.88	46.6681	46.8966	49.1725	48.6027	49.0345
1853.59	47.3144	46.6445	49.0233	47.728	47.2777	42.2251	44.2132	46.5888	44.3248	47.0635	45.1777	34.7768	45.8199	45.9352	42.4912	41.9578	46.5119	46.6179	47.2353	46.6437	43.8885	44.6746	46.1235	46.0801	46.8414	46.2096	47.4791	46.8855	47.0917	45.3292	47.1064	47.6316	47.1995	47.7281	46.6605	48.0461	48.3745	48.3742	48.7722	47.762	48.5903	49.1653	48.6976	48.9744	46.7692	46.9949	49.2763	48.6997	49.1332
1855.52	47.4167	46.7558	49.1281	47.8389	47.3782	42.3323	44.3214	46.6914	44.444	47.1695	45.2835	34.884	45.9234	46.0417	42.598	42.0674	46.6211	46.7213	47.3373	46.7439	43.9928	44.7752	46.235	46.1906	46.9432	46.3125	47.5851	46.9928	47.2028	45.4354	47.2122	47.7348	47.3046	47.8422	46.7585	48.1479	48.4772	48.4833	48.8719	47.8647	48.7002	49.2696	48.8052	49.0799	46.8739	47.1038	49.3787	48.8083	49.2326
1857.45	47.4994	46.8397	49.2111	47.9291	47.457	42.4262	44.4051	46.7761	44.5207	47.2502	45.3714	34.9759	46.0063	46.128	42.6774	42.1405	46.7041	46.8043	47.4273	46.8306	44.0799	44.866	46.3279	46.2763	47.0205	46.3976	47.6661	47.0786	47.2824	45.508	47.2975	47.8237	47.3889	47.9236	46.8327	48.2232	48.5593	48.5608	48.9577	47.9417	48.7873	49.3525	48.8887	49.1621	46.9585	47.182	49.4583	48.8881	49.3128
1859.38	47.5704	46.9115	49.2805	47.9951	47.5338	42.5099	44.4815	46.8489	44.5938	47.3183	45.4492	35.0559	46.0759	46.201	42.7488	42.2113	46.7763	46.8765	47.5056	46.9096	44.1661	44.96	46.4104	46.3651	47.1087	46.4715	47.7356	47.1518	47.3511	45.5764	47.383	47.9059	47.4688	47.9965	46.9127	48.2998	48.641	48.6382	49.0478	48.0229	48.8673	49.4241	48.9665	49.231	47.0331	47.25	49.5276	48.9577	49.3861
1861.31	47.6395	46.986	49.3515	48.0713	47.6075	42.5886	44.5561	46.9211	44.6642	47.3853	45.5244	35.1348	46.147	46.2723	42.8179	42.2719	46.8485	46.9483	47.5805	46.9845	44.2445	45.0374	46.479	46.4449	47.1867	46.5445	47.8126	47.2252	47.4295	45.6396	47.4593	47.9741	47.5406	48.0733	46.9819	48.3743	48.7183	48.7122	49.128	48.1003	48.9458	49.4978	49.0442	49.2989	47.1053	47.3154	49.5998	49.0289	49.4584
1863.24	47.7472	47.0994	49.4685	48.1964	47.733	42.6885	44.6708	47.0371	44.8071	47.5021	45.6358	35.2385	46.2666	46.3883	42.9351	42.4103	46.9568	47.0569	47.6957	47.1003	44.3456	45.148	46.5949	46.5615	47.2984	46.6653	47.9349	47.3414	47.5495	45.7711	47.5661	48.0753	47.6495	48.1863	47.0929	48.4835	48.8297	48.8179	49.2397	48.223	49.068	49.6216	49.1658	49.4244	47.2203	47.4539	49.7151	49.1492	49.5783
1865.17	47.8667	47.2171	49.606	48.3198	47.8852	42.799	44.7839	47.1756	44.9795	47.6328	45.76	35.358	46.4034	46.5349	43.0793	42.6055	47.0671	47.169	47.8284	47.2321	44.4397	45.2887	46.7523	46.6989	47.4274	46.8073	48.0631	47.472	47.6722	45.9448	47.6849	48.1857	47.7719	48.2883	47.2257	48.574	48.9491	48.9185	49.3579	48.3549	49.2171	49.7652	49.3122	49.5745	47.3513	47.6297	49.8541	49.3056	49.7166
1867.09	47.8733	47.1904	49.6283	48.309	47.89	42.8453	44.7459	47.198	44.9373	47.6249	45.7742	35.3998	46.4123	46.5724	43.0926	42.6039	47.0478	47.1569	47.8489	47.2449	44.4407	45.3487	46.8075	46.706	47.4422	46.826	48.0623	47.4696	47.6793	45.9358	47.711	48.1991	47.8069	48.2896	47.2408	48.526	48.9785	48.8919	49.3762	48.3418	49.2423	49.7777	49.3432	49.5789	47.3622	47.6261	49.8774	49.3164	49.7293
1869.02	47.7756	47.0781	49.5139	48.1831	47.7231	42.817	44.6223	47.0867	44.664	47.4883	45.6771	35.3481	46.2848	46.4497	42.9443	42.3042	46.933	47.0492	47.7369	47.124	44.3779	45.2767	46.6869	46.5827	47.334	46.7044	47.946	47.3404	47.5713	45.6877	47.6343	48.1203	47.734	48.225	47.0968	48.4218	48.8875	48.7884	49.3056	48.1805	49.1219	49.646	49.225	49.429	47.2523	47.3995	49.7591	49.1427	49.6046
1870.95	47.8295	47.1743	49.5481	48.2523	47.7832	42.8502	44.7318	47.1287	44.7874	47.5574	45.7228	35.3811	46.3328	46.4701	42.9987	42.3674	47.0135	47.125	47.7648	47.1689	44.469	45.2942	46.7031	46.641	47.3907	46.7416	48.0047	47.4007	47.6232	45.7504	47.6859	48.1958	47.7728	48.2961	47.1516	48.5443	48.928	48.8913	49.3637	48.2773	49.176	49.6944	49.258	49.4934	47.2997	47.4591	49.797	49.1975	49.6427
1872.88	47.9011	47.2713	49.6212	48.3479	47.8764	42.8991	44.8489	47.2039	44.9651	47.6523	45.796	35.436	46.4138	46.5384	43.0899	42.5283	47.1095	47.2133	47.8315	47.2472	44.5589	45.3434	46.767	46.7239	47.4806	46.8167	48.0869	47.4874	47.6952	45.8833	47.7549	48.2781	47.8334	48.3682	47.2461	48.6566	48.9943	48.9952	49.4367	48.404	49.2612	49.7804	49.3333	49.5897	47.3782	47.5846	49.8698	49.2981	49.7188
1874.81	47.9312	47.3062	49.658	48.3963	47.9069	42.931	44.8897	47.2348	45.0229	47.6902	45.8288	35.4688	46.4484	46.5752	43.1261	42.583	47.1468	47.2518	47.8672	47.2813	44.6034	45.382	46.8064	46.7647	47.518	46.8539	48.1175	47.5242	47.7335	45.9274	47.7879	48.313	47.871	48.4055	47.2815	48.6972	49.0247	49.0321	49.4704	48.45	49.3008	49.8152	49.3704	49.6284	47.414	47.6287	49.9056	49.3397	49.753
1876.74	47.9407	47.316	49.6719	48.4077	47.9214	42.9472	44.9027	47.249	45.0388	47.7026	45.8416	35.4872	46.4619	46.59	43.1417	42.5998	47.1596	47.2658	47.8813	47.2919	44.6249	45.4041	46.8293	46.7854	47.5357	46.8683	48.1273	47.5362	47.751	45.9392	47.8043	48.3337	47.8926	48.4283	47.2961	48.7101	49.0405	49.0446	49.4878	48.4618	49.3245	49.8343	49.3872	49.6419	47.4277	47.6386	49.921	49.3558	49.7642
1878.67	47.948	47.3277	49.6824	48.4148	47.9352	42.9645	44.9141	47.2581	45.0483	47.7089	45.8529	35.5001	46.4705	46.5975	43.1514	42.6057	47.1669	47.2697	47.8929	47.3018	44.6369	45.414	46.8445	46.7962	47.5539	46.8754	48.1406	47.5427	47.7567	45.9423	47.818	48.3492	47.908	48.4465	47.3101	48.7205	49.0622	49.059	49.5006	48.4729	49.3472	49.8484	49.4015	49.6571	47.4371	47.6475	49.9269	49.3607	49.7772
1880.6	47.9492	47.3364	49.6881	48.4272	47.9402	42.9718	44.9212	47.2615	45.0557	47.711	45.8574	35.5087	46.472	46.6002	43.1524	42.606	47.1645	47.2678	47.8978	47.3077	44.641	45.4207	46.8551	46.7992	47.5523	46.8775	48.1538	47.5407	47.7521	45.9397	47.8239	48.3575	47.9126	48.4459	47.3184	48.7252	49.0721	49.0646	49.5047	48.4783	49.3575	49.8525	49.4093	49.6662	47.4389	47.6502	49.9281	49.3623	49.7815
1882.52	47.951	47.3438	49.6968	48.4333	47.9465	42.9765	44.9267	47.2697	45.0688	47.7156	45.8643	35.5146	46.473	46.6043	43.1541	42.6182	47.1659	47.2713	47.9048	47.3144	44.6505	45.434	46.8701	46.8073	47.5634	46.8811	48.1619	47.5443	47.756	45.9454	47.8311	48.3635	47.9148	48.445	47.3223	48.7276	49.0742	49.0674	49.5171	48.4827	49.3701	49.8638	49.4201	49.6801	47.4451	47.6617	49.9386	49.3774	49.7887
1884.45	47.945	47.3433	49.6979	48.4219	47.9429	42.9776	44.921	47.2675	45.0593	47.7072	45.8598	35.511	46.4665	46.5997	43.1447	42.6048	47.159	47.2663	47.9033	47.3108	44.6496	45.4318	46.8682	46.8044	47.5664	46.8809	48.149	47.5411	47.7565	45.9382	47.8299	48.3596	47.9068	48.4394	47.3105	48.717	49.0676	49.0601	49.5119	48.4713	49.375	49.8681	49.4223	49.6803	47.4428	47.6551	49.9351	49.372	49.7886
1886.38	47.9719	47.3681	49.7331	48.4627	47.9963	42.9915	44.9503	47.2972	45.1376	47.7472	45.8837	35.5279	46.5047	46.6399	43.19	42.6865	47.1858	47.2916	47.936	47.3455	44.6714	45.4624	46.9076	46.8447	47.5912	46.9207	48.1722	47.5759	47.7874	46.0028	47.8576	48.3842	47.9329	48.4596	47.3557	48.738	49.0929	49.084	49.5294	48.5147	49.4155	49.9142	49.4604	49.7298	47.4739	47.7191	49.9644	49.4183	49.8246
1888.31	47.9089	47.2822	49.6748	48.3918	47.9274	42.9553	44.8644	47.2364	45.0357	47.679	45.8236	35.4816	46.4416	46.5864	43.121	42.6037	47.1017	47.2177	47.8722	47.2792	44.6091	45.4288	46.8618	46.7822	47.5321	46.8579	48.1052	47.5031	47.7197	45.9177	47.8048	48.3234	47.8872	48.3995	47.2955	48.6481	49.0403	49.0006	49.4681	48.4316	49.3553	49.8529	49.4039	49.6619	47.4111	47.6436	49.9026	49.3482	49.7576
1890.24	47.8337	47.2037	49.5965	48.2985	47.8162	42.9088	44.7855	47.1581	44.8865	47.5906	45.748	35.417	46.3522	46.4955	43.0141	42.435	47.0201	47.14	47.7857	47.1869	44.5464	45.3588	46.7683	46.7017	47.4581	46.7685	48.0263	47.4167	47.6431	45.7747	47.7378	48.257	47.8242	48.3395	47.1954	48.5809	48.9668	48.9312	49.4005	48.3328	49.2738	49.7711	49.3232	49.568	47.3313	47.515	49.8233	49.245	49.6681
1892.17	47.8433	47.2338	49.6077	48.3299	47.8435	42.888	44.8221	47.1674	44.9857	47.6163	45.7551	35.4113	46.3677	46.5038	43.0396	42.5137	47.0488	47.1577	47.7926	47.2008	44.5575	45.347	46.7786	46.7163	47.4639	46.7762	48.0403	47.4344	47.6615	45.8325	47.7369	48.264	47.8225	48.3496	47.2181	48.611	48.9625	48.9557	49.398	48.374	49.2975	49.7955	49.3355	49.6042	47.3423	47.568	49.838	49.2863	49.6834
1894.1	47.7953	47.1824	49.5627	48.2804	47.7942	42.8462	44.7683	47.1178	44.9309	47.5652	45.7083	35.367	46.3176	46.4576	42.9894	42.4639	46.9996	47.1048	47.7414	47.1484	44.5131	45.3091	46.7423	46.6695	47.4226	46.7263	47.9859	47.3811	47.6042	45.7833	47.6982	48.2228	47.7772	48.3049	47.1786	48.5569	48.9144	48.9043	49.3548	48.3184	49.255	49.7506	49.2865	49.5591	47.2929	47.5198	49.7941	49.2419	49.6396
1896.03	47.7207	47.1122	49.4885	48.1981	47.7173	42.7823	44.6993	47.0441	44.8364	47.4908	45.6374	35.3	46.2395	46.377	42.9093	42.3597	46.9284	47.0328	47.6615	47.0662	44.4539	45.2427	46.6605	46.5982	47.3562	46.6515	47.912	47.302	47.5245	45.6861	47.6301	48.1548	47.7076	48.2306	47.1021	48.4901	48.839	48.836	49.2904	48.2401	49.1797	49.6778	49.2066	49.4833	47.2198	47.4313	49.7187	49.1557	49.564
1897.95	47.6743	47.0821	49.4458	48.1699	47.6798	42.7314	44.6737	47.0035	44.8277	47.4572	45.5982	35.2508	46.1986	46.3295	42.8681	42.339	46.8897	46.9974	47.6143	47.0221	44.4232	45.2015	46.617	46.5608	47.3237	46.6096	47.879	47.2625	47.4893	45.6548	47.5908	48.1187	47.6664	48.1945	47.0672	48.4635	48.7974	48.8081	49.2473	48.2175	49.1395	49.6457	49.1669	49.453	47.177	47.4015	49.6749	49.1217	49.5216
1899.88	47.6144	47.0277	49.389	48.1236	47.6176	42.671	44.6227	46.9465	44.7878	47.404	45.5469	35.1945	46.1422	46.2716	42.809	42.2966	46.8315	46.939	47.5563	46.9643	44.37	45.1414	46.5656	46.5099	47.2689	46.5516	47.8238	47.204	47.4272	45.6051	47.5369	48.0658	47.6067	48.1424	47.0199	48.4094	48.7428	48.7534	49.1936	48.1655	49.0937	49.5929	49.1157	49.4062	47.1208	47.3523	49.6144	49.0736	49.4641
1901.81	47.5458	46.9562	49.3268	48.0516	47.5558	42.6095	44.5588	46.8775	44.7256	47.338	45.4869	35.1295	46.0753	46.2059	42.7372	42.2285	46.763	46.8706	47.4945	46.9028	44.3066	45.0762	46.5046	46.451	47.2025	46.4879	47.7514	47.1372	47.3552	45.5399	47.48	48.0047	47.5448	48.0751	46.9618	48.3432	48.6798	48.6846	49.1197	48.102	49.0396	49.5368	49.0508	49.3474	47.0577	47.2913	49.5529	49.0099	49.3982
1903.74	47.4757	46.886	49.2629	47.9831	47.5015	42.5409	44.4926	46.8079	44.6657	47.2724	45.4224	35.0614	46.0056	46.1359	42.6648	42.1654	46.6937	46.8028	47.4287	46.8362	44.2385	45.0138	46.441	46.3811	47.1319	46.4198	47.6788	47.0696	47.2955	45.4784	47.4132	47.9368	47.4757	48.0001	46.8961	48.2727	48.6068	48.6105	49.0464	48.0393	48.9785	49.4776	48.983	49.2884	46.9882	47.2296	49.4874	48.9451	49.3336
1905.67	47.4172	46.8255	49.2119	47.9358	47.4526	42.4783	44.4315	46.7515	44.6217	47.2203	45.3652	34.9983	45.9451	46.0812	42.6079	42.1251	46.6341	46.7422	47.3719	46.7785	44.1756	44.9592	46.3905	46.3215	47.074	46.3629	47.6235	47.0112	47.2348	45.4335	47.3503	47.8738	47.4099	47.9362	46.8341	48.2073	48.5438	48.5441	48.9885	47.972	48.9274	49.4301	48.9283	49.2455	46.9289	47.1811	49.4321	48.8952	49.2829
1907.6	47.3248	46.7227	49.1232	47.8382	47.3569	42.3852	44.3248	46.6595	44.5243	47.1263	45.2741	34.9097	45.8483	45.9954	42.5165	42.0358	46.5295	46.6373	47.2797	46.682	44.0737	44.8753	46.306	46.2292	46.9859	46.2688	47.5318	46.9112	47.1247	45.3358	47.2614	47.7786	47.3168	47.8431	46.7494	48.103	48.4545	48.4422	48.8875	47.8624	48.838	49.344	48.8421	49.1563	46.8334	47.0958	49.3423	48.8047	49.1893
1909.53	47.2011	46.5973	49.0006	47.7007	47.2119	42.2754	44.1903	46.5283	44.3594	46.9931	45.1553	34.7917	45.7179	45.8668	42.3769	41.8643	46.4021	46.5061	47.1501	46.5481	43.9542	44.7601	46.1814	46.1121	46.8653	46.1382	47.4048	46.7794	47.0016	45.1786	47.1514	47.6651	47.2058	47.7292	46.6306	47.9822	48.3345	48.3197	48.7678	47.7286	48.7102	49.2127	48.7168	49.0196	46.7013	46.9429	49.2136	48.6642	49.0588
1911.46	47.0978	46.51	48.8959	47.6137	47.1106	42.169	44.1049	46.4219	44.2769	46.8954	45.0567	34.6839	45.6135	45.7545	42.2686	41.7647	46.3085	46.4116	47.0422	46.443	43.8641	44.6486	46.0783	46.0249	46.7713	46.0328	47.3004	46.6797	46.9166	45.0805	47.0503	47.5728	47.1053	47.6291	46.5308	47.9009	48.2304	48.2336	48.6647	47.6378	48.6081	49.12	48.6092	48.9243	46.5995	46.8423	49.1074	48.5627	48.9568
1913.39	47.0334	46.4534	48.8386	47.5626	47.0678	42.0914	44.0632	46.3636	44.2619	46.8464	44.9993	34.6078	45.5563	45.6918	42.2121	41.7444	46.2531	46.3591	46.9806	46.3858	43.8048	44.5767	46.0176	45.974	46.7105	45.9772	47.2435	46.6276	46.8501	45.0514	46.9881	47.5144	47.0366	47.5656	46.4765	47.8482	48.1671	48.1852	48.6005	47.5905	48.559	49.0813	48.5545	48.8841	46.5452	46.8152	49.052	48.5209	48.9057
1915.31	46.9512	46.3676	48.7717	47.4942	47.017	41.9972	43.9863	46.293	44.2403	46.7813	44.9289	34.5261	45.4906	45.6267	42.1564	41.7363	46.1689	46.2764	46.9087	46.3189	43.7139	44.5126	45.9662	45.9079	46.6312	45.9113	47.174	46.5538	46.7652	45.027	46.9134	47.4324	46.957	47.48	46.4234	47.7539	48.0877	48.1004	48.5165	47.5352	48.4982	49.024	48.4909	48.8303	46.4735	46.7833	48.9801	48.4735	48.8398
1917.24	46.7655	46.1608	48.5946	47.2947	46.8011	41.8472	43.7681	46.1064	43.9607	46.5769	44.7528	34.3647	45.2966	45.4444	41.9477	41.4719	45.9637	46.0752	46.7211	46.1241	43.5226	44.3589	45.7914	45.7054	46.4485	45.7216	46.9756	46.3512	46.582	44.7808	46.7423	47.2483	46.7902	47.2993	46.2222	47.5388	47.9089	47.8883	48.3417	47.3029	48.3092	48.8311	48.3058	48.6263	46.2892	46.5502	48.7921	48.2573	48.6479
1919.17	46.635	46.0428	48.4647	47.1633	46.6677	41.7176	43.6424	45.9698	43.8149	46.4498	44.6221	34.2324	45.1581	45.3075	41.8053	41.3076	45.8347	45.9456	46.5849	45.9842	43.3975	44.2202	45.6466	45.5719	46.3144	45.5854	46.8346	46.2194	46.4474	44.623	46.6097	47.1176	46.6515	47.1637	46.0811	47.4184	47.7796	47.7597	48.211	47.1558	48.18	48.6975	48.171	48.4983	46.1538	46.4115	48.6623	48.1244	48.5119
1921.1	46.5457	45.9554	48.3773	47.0806	46.6072	41.6047	43.5543	45.8785	43.7892	46.3708	44.5324	34.1274	45.0709	45.2199	41.7234	41.2875	45.7426	45.8529	46.4936	45.8965	43.3086	44.1237	45.5714	45.4905	46.2289	45.4948	46.7453	46.1277	46.3532	44.5793	46.5141	47.0282	46.554	47.0708	46.0144	47.3267	47.6891	47.669	48.109	47.089	48.0981	48.6215	48.0866	48.429	46.0616	46.3594	48.574	48.058	48.4278
1923.03	46.3488	45.7422	48.1758	46.8729	46.3792	41.4318	43.3464	45.6734	43.5255	46.1595	44.3435	33.9461	44.8625	45.0133	41.5003	41.0162	45.5352	45.6467	46.2885	45.6901	43.124	43.9396	45.3695	45.2897	46.0326	45.29	46.5526	45.9173	46.1568	44.332	46.3314	46.8438	46.3709	46.8881	45.8111	47.1331	47.4932	47.473	47.9206	46.8735	47.8903	48.4182	47.882	48.2096	45.8609	46.1167	48.371	47.8285	48.2208
1924.96	46.2152	45.6257	48.0342	46.7547	46.2457	41.2867	43.2439	45.5346	43.4375	46.0375	44.2107	33.8014	44.7294	44.873	41.3735	40.9043	45.4165	45.5222	46.1503	45.5552	43.0095	43.797	45.2268	45.1655	45.9011	45.1538	46.4277	45.7879	46.0236	44.2191	46.2041	46.7193	46.2387	46.7607	45.6873	47.0384	47.3599	47.3635	47.7889	46.7665	47.7619	48.2848	47.7414	48.0862	45.726	45.9966	48.2343	47.702	48.0859
1926.89	46.0772	45.4987	47.8977	46.6212	46.1223	41.1385	43.1257	45.4002	43.344	45.9091	44.0778	33.6577	44.5973	44.7357	41.2443	40.8044	45.2901	45.3919	46.0164	45.4199	42.8815	43.656	45.0917	45.03	45.774	45.0217	46.2859	45.6546	45.8799	44.1104	46.067	46.5858	46.101	46.6253	45.5606	46.9175	47.2261	47.2376	47.6518	46.6508	47.6343	48.1582	47.6072	47.9649	45.591	45.8796	48.0976	47.5761	47.9571
1928.82	45.9259	45.3522	47.7557	46.4797	45.986	40.9875	42.9805	45.2563	43.2112	45.7648	43.9359	33.5084	44.4525	44.589	41.0969	40.6687	45.1413	45.2456	45.8647	45.266	42.7346	43.5033	44.95	44.884	45.6305	44.8756	46.1338	45.5099	45.7356	43.9708	45.92	46.4421	45.9513	46.484	45.4177	46.7719	47.082	47.0922	47.5017	46.5092	47.4857	48.022	47.4637	47.8236	45.4435	45.7417	47.9521	47.4294	47.8125
1930.74	45.7604	45.1829	47.5938	46.3234	45.8258	40.823	42.8143	45.0904	43.0514	45.6027	43.7761	33.3459	44.2839	44.4225	40.9288	40.5067	44.9716	45.082	45.6948	45.0983	42.5659	43.3393	44.7904	44.7235	45.4705	44.7094	45.972	45.3472	45.5806	43.8074	45.7577	46.2806	45.7867	46.3185	45.2575	46.6088	46.9186	46.9283	47.3396	46.339	47.3254	47.8647	47.3018	47.6636	45.2778	45.5834	47.7878	47.2654	47.6479
1932.67	45.5961	45.0125	47.4276	46.159	45.6616	40.6564	42.6494	44.9222	42.8914	45.4353	43.6114	33.1782	44.1132	44.254	40.7552	40.342	44.8085	44.918	45.5266	44.9315	42.4013	43.1771	44.626	44.5619	45.3077	44.541	45.8058	45.1793	45.4108	43.6439	45.5984	46.1138	45.6216	46.1535	45.0971	46.4459	46.7552	46.7668	47.1755	46.1737	47.1714	47.7049	47.1356	47.5033	45.1113	45.4216	47.6207	47.1029	47.4803
1934.6	45.42	44.8404	47.2474	45.9839	45.483	40.4778	42.4756	44.7435	42.7189	45.2573	43.4373	33.0015	43.9382	44.0766	40.5749	40.1628	44.632	44.7401	45.3521	44.7552	42.225	42.9967	44.4458	44.3843	45.1301	44.3641	45.6253	45	45.2335	43.4676	45.4274	45.9326	45.4386	45.9745	44.9141	46.266	46.5781	46.5894	46.9938	45.9976	46.9977	47.5297	46.9584	47.3281	44.9343	45.2475	47.4466	46.9294	47.3008
1936.53	45.2517	44.6808	47.0833	45.8226	45.3205	40.3064	42.3113	44.5756	42.5657	45.0913	43.2727	32.8289	43.7727	43.9112	40.4074	40.0025	44.4632	44.5708	45.1907	44.5896	42.0615	42.8332	44.286	44.2227	44.966	44.2003	45.4567	44.8314	45.0692	43.3097	45.2647	45.7661	45.2689	45.8048	44.7471	46.1006	46.4168	46.424	46.8266	45.8359	46.834	47.3676	46.7948	47.1681	44.7664	45.0881	47.2832	46.7667	47.1338
1938.46	45.099	44.5388	46.945	45.6785	45.191	40.142	42.1652	44.429	42.4487	44.9481	43.1253	32.6706	43.6248	43.7659	40.2627	39.8844	44.3122	44.4195	45.0448	44.4454	41.8999	42.6848	44.1425	44.0815	44.811	44.0572	45.3159	44.6851	44.9118	43.1901	45.1118	45.6049	45.1121	45.641	44.598	45.9466	46.2645	46.2721	46.6692	45.693	46.6932	47.2277	46.6513	47.0325	44.6199	44.9651	47.1376	46.6322	46.9964
1940.39	44.9286	44.3518	46.7825	45.5083	45.0392	39.9632	41.9757	44.2602	42.2958	44.7779	42.9563	32.5022	43.4575	43.605	40.0994	39.7515	44.129	44.2378	44.8796	44.2796	41.7123	42.5268	43.9942	43.9133	44.6352	43.8883	45.1521	44.5137	44.7466	43.045	44.9393	45.4268	44.946	45.4592	44.4356	45.7518	46.093	46.0818	46.4965	45.5213	46.528	47.0657	46.488	46.8723	44.451	44.8185	46.9728	46.4731	46.8329
1942.32	44.659	44.0463	46.5116	45.2229	44.7323	39.7276	41.6782	43.9853	41.9348	44.4874	42.6849	32.2567	43.1749	43.3298	39.8033	39.3928	43.843	43.9546	44.6052	43.9967	41.4468	42.2759	43.727	43.6368	44.3717	43.6053	44.8725	44.2282	44.4751	42.7118	44.6846	45.1703	44.6956	45.2014	44.1602	45.4712	45.8341	45.8045	46.2423	45.2208	46.2504	46.7875	46.2173	46.5753	44.1723	44.4945	46.6992	46.1739	46.5548
1944.25	44.4492	43.8493	46.3004	45.0293	44.5251	39.5207	41.4924	43.7766	41.7506	44.2873	42.4771	32.0481	42.9666	43.1158	39.5964	39.1832	43.6449	43.7551	44.3886	43.7854	41.2501	42.0547	43.5082	43.4362	44.1704	43.394	44.6607	44.0267	44.2671	42.5085	44.4808	44.9736	44.4873	45.0046	43.9579	45.291	45.6253	45.6184	46.0411	45.0319	46.0494	46.5797	46.01	46.3682	43.9636	44.2923	46.4912	45.9708	46.3445
1946.18	44.2507	43.6752	46.0992	44.8448	44.3421	39.3143	41.3135	43.5816	41.5953	44.098	42.2808	31.8456	42.7715	42.9143	39.4045	39.0206	43.4586	43.5646	44.1858	43.5855	41.0613	41.8476	43.3088	43.2491	43.9716	43.1987	44.4621	43.8307	44.0684	42.338	44.2847	44.7835	44.2875	44.8106	43.7637	45.109	45.4292	45.436	45.8446	44.8525	45.8575	46.3865	45.8125	46.1801	43.7692	44.1123	46.2943	45.7795	46.1511
1948.1	44.0499	43.4842	45.8984	44.6481	44.1445	39.1051	41.1194	43.3786	41.4137	43.9008	42.0759	31.6395	42.5681	42.7093	39.201	38.8329	43.2616	43.3654	43.9797	43.3807	40.8636	41.6395	43.1029	43.0514	43.775	42.9962	44.264	43.6261	43.8695	42.1472	44.0837	44.5844	44.0811	44.609	43.5625	44.9169	45.2289	45.2457	45.645	44.6623	45.6561	46.1913	45.6051	45.9831	43.5675	43.9197	46.0918	45.583	45.95
1950.03	43.8367	43.2657	45.688	44.4371	43.9317	38.8866	40.9092	43.1644	41.2141	43.6908	41.8609	31.424	42.3564	42.497	38.986	38.6299	43.05	43.1521	43.7643	43.1639	40.6509	41.4216	42.8912	42.8368	43.572	42.782	44.0541	43.4127	43.6545	41.9408	43.8741	44.3751	43.8662	44.3931	43.3512	44.7089	45.0145	45.035	45.4312	44.4583	45.4463	45.9752	45.3909	45.7721	43.3508	43.7147	45.8752	45.3705	45.7354
1951.96	43.6232	43.0487	45.4812	44.2266	43.7269	38.6716	40.6992	42.9564	41.017	43.481	41.6491	31.2111	42.1474	42.2867	38.7791	38.4321	42.8378	42.9382	43.5521	42.9506	40.4353	41.2071	42.6864	42.6246	43.3584	42.5723	43.8389	43.2009	43.4386	41.7391	43.6661	44.166	43.6555	44.183	43.1473	44.5002	44.8074	44.8247	45.2191	44.2568	45.2415	45.7678	45.1861	45.5638	43.1385	43.5128	45.6628	45.1647	45.5288
1953.89	43.3881	42.8207	45.2493	43.9935	43.4972	38.4391	40.4633	42.7244	40.7904	43.246	41.4149	30.9823	41.9122	42.0535	38.5486	38.2056	42.6032	42.7037	43.3175	42.7164	40.198	40.9769	42.4539	42.3875	43.1218	42.3383	43.5983	42.9651	43.2104	41.51	43.4335	43.9368	43.4194	43.9456	42.9141	44.2645	44.5757	44.5929	44.987	44.028	45.0118	45.5404	44.9568	45.3309	42.9053	43.2851	45.4322	44.9349	45.2938
1955.82	43.1559	42.592	45.0173	43.7682	43.2701	38.2083	40.2345	42.4917	40.5664	43.0145	41.1843	30.7561	41.6827	41.8232	38.3162	37.9767	42.3713	42.4729	43.0856	42.4874	39.9684	40.7477	42.226	42.159	42.8922	42.1076	43.3692	42.735	42.9787	41.2826	43.2034	43.7099	43.1878	43.7091	42.6776	44.0334	44.3448	44.365	44.7594	43.8019	44.7872	45.3087	44.7244	45.1057	42.6741	43.0584	45.2061	44.7026	45.0646
1957.75	42.9195	42.3516	44.7797	43.5359	43.0372	37.9689	40	42.2552	40.345	42.7775	40.9449	30.5216	41.4474	41.5883	38.0797	37.7524	42.1348	42.2341	42.8515	42.2531	39.737	40.5081	41.9938	41.9239	42.6593	41.8722	43.1419	42.4997	42.7322	41.0598	42.9695	43.4752	42.9532	43.4759	42.4439	43.7989	44.1127	44.1321	44.5218	43.5744	44.5502	45.0786	44.4875	44.8692	42.4373	42.8298	44.9685	44.4676	44.8329
1959.68	42.6864	42.1094	44.5469	43.3041	42.8054	37.7382	39.7649	42.0239	40.1221	42.5422	40.7085	30.2881	41.2121	41.3534	37.8484	37.5294	41.9015	42.0013	42.6213	42.0198	39.4986	40.2758	41.7641	41.6948	42.4271	41.6371	42.9082	42.266	42.5059	40.8346	42.7377	43.2398	42.7197	43.2454	42.215	43.5682	43.8815	43.9031	44.2878	43.3464	44.3187	44.8458	44.2587	44.637	42.2029	42.6035	44.7355	44.2376	44.6007
1961.61	42.4441	41.8654	44.3044	43.0631	42.5632	37.4964	39.523	41.7832	39.8877	42.2983	40.4637	30.0488	40.9714	41.1097	37.603	37.2914	41.6565	41.7569	42.3767	41.7749	39.2453	40.0355	41.5199	41.4581	42.1778	41.3948	42.6581	42.0216	42.2738	40.5973	42.4932	42.9905	42.472	42.9986	41.9675	43.3261	43.6367	43.6603	44.051	43.1059	44.0779	44.6045	44.0202	44.3986	41.9586	42.3641	44.4967	43.9972	44.3595
1963.53	42.2296	41.6597	44.0935	42.8534	42.3626	37.2687	39.3068	41.5675	39.7013	42.0853	40.2416	29.8284	40.7594	40.8961	37.3921	37.1017	41.4363	41.5383	42.1594	41.5596	39.018	39.8107	41.3017	41.2436	41.9538	41.1806	42.4362	41.8062	42.0532	40.4015	42.2715	42.7627	42.2476	42.7702	41.7536	43.1033	43.4174	43.4388	43.8311	42.8973	43.865	44.3956	43.8072	44.1896	41.7423	42.1682	44.2865	43.7919	44.145
1965.46	41.9671	41.3949	43.8366	42.5848	42.1031	37.0131	39.0319	41.3075	39.4357	41.8208	39.977	29.5779	40.4965	40.6389	37.1333	36.8472	41.1675	41.2724	41.8981	41.2977	38.7534	39.5523	41.0464	40.9798	41.6888	40.9193	42.1763	41.5381	41.7928	40.1462	42.0156	42.4941	41.9869	42.5034	41.4991	42.8246	43.1598	43.1711	43.5645	42.636	43.6106	44.1321	43.5514	43.9252	41.4808	41.9098	44.0278	43.5327	43.8844
1967.39	41.6763	41.0949	43.5453	42.283	41.7924	36.7426	38.7347	41.0197	39.1096	41.5275	39.6842	29.3051	40.2003	40.3451	36.8332	36.5218	40.8776	40.9793	41.6042	40.9997	38.4733	39.2674	40.7583	40.6839	41.4013	40.6252	41.8901	41.2415	41.5074	39.8369	41.7381	42.208	41.7057	42.2223	41.2058	42.5381	42.8804	42.8894	43.2853	42.3425	43.3205	43.8393	43.2627	43.6254	41.1892	41.5971	43.7361	43.2337	43.5938
1969.32	41.4193	40.8337	43.2882	42.0365	41.5412	36.4813	38.4914	40.7632	38.8845	41.2782	39.4204	29.049	39.9426	40.0845	36.5801	36.2874	40.6297	40.7272	41.3432	40.7427	38.2214	39.0021	40.4992	40.4328	41.1531	40.3643	41.6344	40.9876	41.2436	39.5969	41.48	41.9539	41.444	41.9656	40.9502	42.2975	42.6245	42.6435	43.0344	42.1015	43.0592	43.5838	43.0013	43.3775	40.9333	41.3548	43.4779	42.985	43.3343
1971.25	41.1796	40.5931	43.0487	41.798	41.3108	36.2326	38.2569	40.5212	38.6703	41.0387	39.1729	28.8057	39.7017	39.8406	36.3444	36.0722	40.3896	40.4884	41.0998	40.5023	37.9763	38.7561	40.2561	40.1928	40.9133	40.121	41.386	40.7479	40.9944	39.3711	41.2377	41.7121	41.1976	41.7204	40.7124	42.0606	42.3789	42.4039	42.7935	41.8739	42.8144	43.3401	42.762	43.1404	40.6917	41.1281	43.2386	42.7499	43.0954
1973.18	40.9132	40.3383	42.7821	41.5299	41.0489	35.9651	37.9901	40.2557	38.4152	40.7711	38.9051	28.5469	39.4408	39.578	36.0849	35.8176	40.1237	40.2187	40.8361	40.2371	37.706	38.4838	39.9893	39.9264	40.651	39.856	41.1194	40.4821	40.7396	39.113	40.9713	41.4421	40.9285	41.4519	40.4462	41.796	42.1073	42.1365	42.5252	41.613	42.5522	43.077	42.4987	42.8745	40.425	40.8709	42.9737	42.486	42.8346
1975.11	40.6497	40.0805	42.5197	41.27	40.7852	35.7047	37.7248	39.9935	38.1621	40.5079	38.6392	28.2907	39.1827	39.3171	35.8271	35.5634	39.8596	39.9546	40.5755	39.9761	37.443	38.2151	39.7287	39.6706	40.3906	39.5925	40.8595	40.2157	40.4796	38.8589	40.7086	41.1734	40.663	41.1895	40.1878	41.5351	41.8454	41.8753	42.2638	41.356	42.2968	42.8151	42.2381	42.6137	40.1614	40.6141	42.7108	42.2272	42.5794
1977.04	40.3804	39.8009	42.2501	40.9984	40.5136	35.4339	37.453	39.721	37.8969	40.2363	38.3625	28.0276	38.9103	39.0429	35.5564	35.3011	39.588	39.6859	40.302	39.7026	37.1713	37.9374	39.4601	39.3936	40.1114	39.3182	40.5853	39.9392	40.2009	38.5964	40.4366	40.8941	40.3862	40.9126	39.9186	41.2606	41.5752	41.6056	41.9894	41.0965	42.0233	42.5394	41.9664	42.3425	39.8874	40.3457	42.4395	41.9586	42.3088
1978.97	40.1198	39.5278	41.9898	40.7316	40.2531	35.171	37.1865	39.4558	37.6389	39.9716	38.0943	27.769	38.6435	38.7786	35.2899	35.049	39.3227	39.4216	40.0357	39.4354	36.9015	37.6664	39.1965	39.1223	39.8469	39.0546	40.317	39.6762	39.9384	38.3397	40.1716	40.6253	40.119	40.6436	39.6531	40.9916	41.3077	41.3385	41.7273	40.8392	41.756	42.2804	41.6983	42.0807	39.621	40.0884	42.1734	41.6936	42.0418
1980.89	39.8425	39.2506	41.7155	40.4599	39.9818	34.8992	36.9097	39.1817	37.3727	39.696	37.8154	27.4996	38.3683	38.5047	35.0163	34.7854	39.0456	39.1415	39.7613	39.1578	36.6159	37.3873	38.9181	38.8391	39.5662	38.7794	40.0419	39.4053	39.6715	38.0745	39.895	40.3514	39.8411	40.365	39.3807	40.7148	41.0333	41.0641	41.4513	40.5623	41.4818	42.003	41.4204	41.8078	39.3444	39.8198	41.896	41.4219	41.7644
1982.82	39.5774	38.9901	41.4502	40.1958	39.7144	34.6326	36.6425	38.9146	37.115	39.4303	37.5438	27.2403	38.1034	38.2411	34.7524	34.5272	38.7778	38.8698	39.4963	38.8928	36.3413	37.1217	38.6524	38.5674	39.295	38.5141	39.7794	39.1386	39.405	37.8179	39.6205	40.0818	39.5681	40.0927	39.1145	40.4452	40.7687	40.7989	41.1796	40.2922	41.2085	41.7354	41.155	41.5397	39.0752	39.5585	41.6333	41.1596	41.4976
1984.75	39.3087	38.7129	41.1821	39.9221	39.4447	34.3604	36.3713	38.6441	36.8592	39.1646	37.2694	26.9779	37.8343	37.9757	34.491	34.2761	38.5094	38.5999	39.2224	38.6261	36.0667	36.8456	38.3835	38.2994	39.0209	38.2455	39.5119	38.864	39.1321	37.5612	39.3448	39.807	39.2947	39.8117	38.845	40.1709	40.4971	40.5275	40.9056	40.0242	40.9353	41.4678	40.8861	41.2734	38.804	39.3	41.365	40.895	41.2305
1986.68	39.0404	38.433	40.9198	39.6571	39.1824	34.1	36.0995	38.3792	36.5956	38.9016	37	26.7212	37.5711	37.7126	34.2326	34.0257	38.2441	38.3358	38.9559	38.3607	35.7906	36.5702	38.1174	38.0366	38.7435	37.9801	39.2384	38.5936	38.8683	37.3062	39.0767	39.5334	39.0227	39.5349	38.5802	39.896	40.2325	40.2565	40.6409	39.7608	40.6712	41.2038	40.6234	41.0092	38.5376	39.0429	41.101	40.6359	40.9687
1988.61	38.7691	38.1649	40.65	39.3909	38.9238	33.8271	35.8212	38.1101	36.3364	38.6307	36.7246	26.4609	37.3024	37.4444	33.9674	33.7774	37.9689	38.0608	38.6873	38.0888	35.5075	36.2986	37.8474	37.7719	38.4646	37.7091	38.9603	38.3243	38.5944	37.048	38.7986	39.2534	38.7422	39.258	38.3117	39.6169	39.9644	39.9803	40.3675	39.4969	40.3958	40.9353	40.3574	40.7406	38.2645	38.7851	40.8342	40.3748	40.7009
1990.54	38.4859	37.8811	40.3636	39.0945	38.6369	33.547	35.5215	37.8257	36.0453	38.3398	36.4324	26.192	37.0162	37.1621	33.679	33.498	37.6741	37.7644	38.3974	37.7983	35.2109	36.0181	37.561	37.482	38.1814	37.4183	38.6716	38.0353	38.3116	36.7636	38.5096	38.961	38.4546	38.969	38.027	39.3151	39.6754	39.6832	40.0766	39.2062	40.1056	40.6423	40.0719	40.4517	37.9781	38.4971	40.5468	40.0893	40.4142
1992.47	38.1627	37.5539	40.0359	38.7589	38.2891	33.2465	35.1936	37.501	35.6847	38.0096	36.1047	25.8936	36.6892	36.8329	33.3462	33.1378	37.3479	37.4377	38.0646	37.4662	34.8948	35.7003	37.2317	37.1474	37.864	37.0878	38.3417	37.705	37.9947	36.4174	38.1939	38.6436	38.1376	38.6487	37.6996	38.9912	39.3524	39.3605	39.7599	38.8742	39.7733	40.3101	39.7375	40.115	37.6525	38.1492	40.2153	39.7503	40.0858
1994.4	37.9072	37.2916	39.7711	38.5054	38.0344	32.9798	34.9524	37.2383	35.4627	37.7613	35.8411	25.6365	36.4309	36.5687	33.0967	32.9082	37.0982	37.188	37.8027	37.2099	34.6376	35.4246	36.9647	36.8809	37.6015	36.8269	38.0804	37.4454	37.7339	36.1811	37.9224	38.383	37.8671	38.3825	37.4388	38.7457	39.0853	39.1079	39.4922	38.6302	39.5079	40.0517	39.4668	39.861	37.393	37.9083	39.9527	39.4996	39.823
1996.32	37.6391	37.0132	39.4994	38.2314	37.7733	32.7046	34.6863	36.9656	35.217	37.4942	35.5674	25.3735	36.1624	36.2969	32.8363	32.6683	36.8331	36.9194	37.5336	36.945	34.3633	35.1412	36.6908	36.6098	37.3279	36.5564	37.8107	37.172	37.4526	35.9305	37.6426	38.1063	37.5869	38.1057	37.1692	38.4762	38.8126	38.8389	39.2148	38.3616	39.2316	39.7772	39.1931	39.59	37.1198	37.6496	39.6833	39.2355	39.5519
1998.25	37.3615	36.7386	39.2241	37.9566	37.5006	32.4318	34.4052	36.6893	34.9458	37.2144	35.2863	25.1095	35.8882	36.0201	32.5663	32.4052	36.555	36.6397	37.2588	36.6694	34.0806	34.8548	36.4096	36.3368	37.0591	36.278	37.536	36.8941	37.1757	35.6628	37.3638	37.8261	37.3089	37.8254	36.8982	38.1972	38.5362	38.5627	38.9402	38.0849	38.9548	39.4957	38.9172	39.3132	36.8394	37.3781	39.4063	38.9601	39.2789
2000.18	37.0786	36.4577	38.9373	37.6743	37.2153	32.1531	34.1179	36.4058	34.663	36.9271	34.9976	24.8405	35.6035	35.7356	32.2868	32.1331	36.2692	36.35	36.9731	36.382	33.7869	34.5595	36.1182	36.0513	36.7629	35.9904	37.255	36.6087	36.8956	35.3857	37.0748	37.5316	37.0189	37.5336	36.6166	37.9078	38.2443	38.2737	38.6511	37.8008	38.6634	39.2067	38.628	39.0264	36.5544	37.0974	39.1207	38.6755	38.9924
2002.11	36.8082	36.1914	38.666	37.3945	36.9458	31.8844	33.8472	36.1337	34.3994	36.6575	34.7233	24.5815	35.3318	35.4636	32.0218	31.8755	35.9967	36.0779	36.7016	36.1067	33.5081	34.2808	35.8467	35.7788	36.4785	35.7188	36.9812	36.3373	36.6259	35.1263	36.7971	37.2486	36.7388	37.2559	36.347	37.6334	37.9654	38.0016	38.3728	37.5303	38.3799	38.9335	38.3498	38.7508	36.2841	36.8309	38.849	38.4043	38.7205
2004.04	36.5276	35.9042	38.3832	37.109	36.6653	31.606	33.5637	35.8493	34.1255	36.3776	34.44	24.3154	35.0511	35.1815	31.747	31.6081	35.7165	35.7963	36.4188	35.8248	33.2218	33.9997	35.563	35.4883	36.1922	35.4377	36.694	36.0555	36.3453	34.8567	36.5042	36.9576	36.4519	36.9688	36.0655	37.3479	37.6817	37.7187	38.0821	37.2462	38.0876	38.6476	38.0657	38.4677	36.0008	36.5536	38.563	38.1218	38.4405
2005.97	36.2597	35.6204	38.1089	36.8426	36.3968	31.3373	33.2885	35.5766	33.8629	36.108	34.166	24.0597	34.7815	34.9116	31.482	31.3544	35.4453	35.5232	36.1459	35.5575	32.9453	33.722	35.2889	35.2059	35.9086	35.1651	36.4161	35.7844	36.0747	34.5932	36.2262	36.677	36.1768	36.6903	35.7945	37.0726	37.41	37.4447	37.8043	36.9768	37.8103	38.3725	37.7933	38.194	35.7266	36.2893	38.2918	37.8529	38.1684
2007.9	35.9782	35.3377	37.821	36.5517	36.11	31.0597	33.0015	35.2923	33.5781	35.8245	33.8799	23.7938	34.5011	34.6303	31.2051	31.0839	35.1602	35.238	35.8635	35.2732	32.6557	33.4253	35.004	34.9152	35.6204	34.8801	36.1307	35.4993	35.7892	34.3138	35.9402	36.3855	35.8877	36.4022	35.514	36.7834	37.1239	37.1563	37.5174	36.6923	37.52	38.0881	37.5058	37.9044	35.4408	36.0087	38.0069	37.5697	37.8807
2009.83	35.71	35.0725	37.5497	36.2771	35.8383	30.7959	32.7327	35.0233	33.3131	35.5553	33.6073	23.5422	34.238	34.3624	30.9427	30.8296	34.8926	34.9695	35.5958	35.0036	32.3801	33.1504	34.7265	34.6463	35.3425	34.6126	35.8647	35.2292	35.5185	34.056	35.6614	36.1077	35.6069	36.127	35.2447	36.5111	36.8498	36.8831	37.2484	36.421	37.242	37.8151	37.2327	37.6314	35.171	35.746	37.7355	37.3013	37.6131
2011.76	35.4382	34.7983	37.2759	36.0049	35.5653	30.5253	32.4577	34.7532	33.0496	35.2831	33.3305	23.2873	33.9672	34.0909	30.6777	30.5709	34.6182	34.6975	35.3219	34.7309	32.1004	32.8787	34.4504	34.37	35.0613	34.3394	35.592	34.9566	35.2462	33.7968	35.3798	35.8215	35.3277	35.8445	34.9702	36.2366	36.572	36.6058	36.9688	36.145	36.9582	37.535	36.9567	37.3563	34.8973	35.4808	37.4612	37.026	37.3419
2013.68	35.1896	34.5349	37.0267	35.7484	35.3222	30.2699	32.2016	34.5019	32.8131	35.0325	33.0728	23.0458	33.7175	33.8418	30.4359	30.3442	34.3657	34.445	35.0705	34.4822	31.839	32.6192	34.1988	34.1122	34.8091	34.0865	35.3364	34.7059	34.9988	33.564	35.1171	35.5506	35.0662	35.5752	34.7185	35.976	36.3149	36.3444	36.7021	35.8885	36.6994	37.2808	36.7031	37.1068	34.6444	35.2407	37.2126	36.7837	37.0905
2015.61	34.9099	34.245	36.7435	35.4561	35.0417	30.0017	31.9142	34.2177	32.5238	34.746	32.7891	22.7903	33.4388	33.5635	30.1617	30.0726	34.082	34.1587	34.79	34.2023	31.5507	32.3354	33.9156	33.8296	34.5234	33.8024	35.053	34.4222	34.7167	33.2871	34.8321	35.261	34.78	35.2854	34.4374	35.6809	36.0302	36.0543	36.4163	35.5987	36.4103	36.993	36.4169	36.8197	34.3626	34.9591	36.9329	36.5022	36.8082
2017.54	34.6305	33.9713	36.453	35.1689	34.7524	29.7341	31.6266	33.9371	32.2241	34.4581	32.5011	22.5341	33.1553	33.2786	29.8843	29.7821	33.7975	33.8714	34.5041	33.9161	31.2642	32.0484	33.6307	33.543	34.2367	33.5147	34.7693	34.136	34.4285	32.9995	34.548	34.9793	34.4951	35.0029	34.1535	35.3954	35.7476	35.7707	36.1299	35.3155	36.1155	36.6971	36.1239	36.5264	34.079	34.6675	36.645	36.2124	36.5221
2019.47	34.3649	33.7064	36.184	34.9017	34.4857	29.4681	31.366	33.6701	31.972	34.1952	32.2303	22.2848	32.8896	33.0125	29.631	29.5373	33.5339	33.6077	34.2351	33.6512	30.9952	31.7671	33.3538	33.2711	33.9706	33.2482	34.4983	33.8683	34.1639	32.7497	34.2733	34.7078	34.2252	34.7329	33.8904	35.1332	35.4793	35.5095	35.8557	35.0529	35.8377	36.4259	35.8472	36.2534	33.8101	34.408	36.3705	35.9495	36.2498
2021.4	34.1166	33.4449	35.9311	34.6448	34.2359	29.2159	31.116	33.4138	31.7328	33.9462	31.9759	22.0485	32.6426	32.7621	29.3906	29.3087	33.2848	33.3589	33.9824	33.3997	30.7379	31.5028	33.0917	33.0143	33.7206	32.9969	34.2361	33.6169	33.9199	32.5127	34.0101	34.4468	33.9664	34.4732	33.6409	34.8814	35.2239	35.2566	35.5953	34.7976	35.5755	36.1692	35.5907	36.0001	33.5542	34.1646	36.1172	35.7005	35.9963
2023.33	33.8546	33.1704	35.6617	34.3817	33.973	28.9543	30.8471	33.1478	31.4713	33.6806	31.7079	21.8039	32.3805	32.4957	29.1273	29.0569	33.0199	33.0924	33.7168	33.1321	30.4681	31.2321	32.8202	32.7435	33.4479	32.732	33.9678	33.3523	33.6576	32.2544	33.7324	34.1738	33.6903	34.2037	33.3759	34.6106	34.9537	34.9846	35.3289	34.5296	35.3001	35.8986	35.3204	35.7289	33.2841	33.902	35.8524	35.4322	35.732
2025.26	33.6086	32.9174	35.4062	34.1289	33.7228	28.7063	30.593	32.8989	31.225	33.4284	31.4524	21.5712	32.1315	32.2461	28.8816	28.8224	32.7675	32.8385	33.4666	32.8837	30.2133	30.9741	32.5643	32.4907	33.1799	32.4796	33.7185	33.1008	33.3985	32.0162	33.4683	33.9136	33.4302	33.9427	33.1205	34.3521	34.6939	34.7255	35.0723	34.2761	35.0356	35.6399	35.0616	35.4679	33.0291	33.6514	35.5998	35.1802	35.4838
2027.19	33.3506	32.6624	35.1424	33.8581	33.4582	28.4539	30.3351	32.642	30.9679	33.1696	31.1896	21.335	31.8747	31.9883	28.6318	28.5778	32.5094	32.5802	33.207	32.6265	29.9471	30.7126	32.299	32.2234	32.9131	32.2194	33.4624	32.8413	33.1362	31.7646	33.2029	33.6491	33.1663	33.6706	32.8574	34.087	34.4292	34.4612	34.8023	34.0161	34.7632	35.3679	34.7974	35.2039	32.7699	33.3959	35.3363	34.9196	35.2187
2029.11	33.107	32.4123	34.8903	33.6128	33.209	28.2124	30.0902	32.3959	30.7253	32.9246	30.9394	21.112	31.6313	31.7441	28.3951	28.3455	32.2661	32.3366	32.9594	32.3812	29.6899	30.4581	32.0474	31.9656	32.6549	31.9749	33.2162	32.5951	32.896	31.5271	32.9485	33.3925	32.9107	33.4161	32.6072	33.8339	34.1757	34.2103	34.5459	33.7681	34.5077	35.1142	34.5463	34.9525	32.5239	33.1544	35.0858	34.6694	34.9707
2031.04	32.8573	32.1542	34.633	33.3562	32.9563	27.9617	29.8357	32.1427	30.4753	32.6703	30.6832	20.8825	31.3807	31.4929	28.1519	28.1078	32.0153	32.0836	32.7053	32.1281	29.4284	30.194	31.7922	31.7079	32.3936	31.7236	32.956	32.3411	32.6433	31.2876	32.685	33.1292	32.6474	33.1569	32.3519	33.577	33.9167	33.9514	34.2803	33.5114	34.2386	34.8534	34.285	34.6897	32.27	32.9048	34.8285	34.4133	34.7168
2032.97	32.6199	31.9127	34.3921	33.108	32.7149	27.7265	29.5941	31.9026	30.2377	32.4297	30.4387	20.662	31.1437	31.2556	27.9232	27.8819	31.7783	31.8411	32.4649	31.8859	29.1818	29.9495	31.5472	31.4575	32.1387	31.4823	32.7085	32.1008	32.4021	31.0583	32.435	32.8825	32.4022	32.9093	32.1123	33.3334	33.6747	33.7072	34.0388	33.271	33.9829	34.6073	34.0376	34.444	32.0286	32.6687	34.5847	34.1727	34.4732
2034.9	32.3746	31.6626	34.1425	32.8615	32.4665	27.4865	29.3468	31.657	29.9949	32.1812	30.1886	20.438	30.9014	31.0121	27.6862	27.6495	31.5307	31.5931	32.2195	31.6409	28.9327	29.7005	31.2967	31.2044	31.8805	31.2332	32.4617	31.8547	32.1662	30.8228	32.1776	32.6301	32.1535	32.6556	31.8688	33.0828	33.4228	33.46	33.7932	33.0245	33.7263	34.3524	33.785	34.1935	31.7814	32.4258	34.3336	33.927	34.2247
2036.83	32.1455	31.4354	33.9091	32.6325	32.2366	27.2609	29.1154	31.4261	29.7696	31.9513	29.9561	20.2283	30.6754	30.785	27.4686	27.4383	31.3013	31.367	31.99	31.4143	28.6916	29.4618	31.0622	30.978	31.6541	31.0047	32.2347	31.6278	31.9427	30.6056	31.9363	32.386	31.9116	32.4167	31.6335	32.8462	33.1867	33.2269	33.5543	32.792	33.4839	34.1158	33.5481	33.9557	31.5501	32.2022	34.1026	33.7006	33.9922
2038.76	31.9115	31.1917	33.6689	32.3871	32.0028	27.0266	28.8767	31.1904	29.5402	31.717	29.7175	20.0153	30.4427	30.5515	27.2445	27.223	31.0643	31.1335	31.7529	31.1811	28.4488	29.2199	30.8236	30.743	31.4194	30.7702	31.9951	31.3924	31.6956	30.3828	31.6889	32.134	31.6646	32.1716	31.3966	32.6007	32.9458	32.9853	33.3096	32.5566	33.2374	33.8691	33.305	33.7109	31.3142	31.9718	33.8662	33.4642	33.7588
2040.69	31.6847	30.9487	33.4317	32.1477	31.7691	26.804	28.6396	30.9574	29.3007	31.4817	29.4785	19.8084	30.2123	30.3188	27.019	26.9955	30.8322	30.8987	31.5192	30.9489	28.2123	28.9819	30.5852	30.4972	31.1772	30.5353	31.7575	31.1579	31.4549	30.1581	31.4484	31.8899	31.4289	31.9276	31.1641	32.363	32.7141	32.7482	33.0738	32.3227	33.0001	33.6243	33.0658	33.4703	31.0808	31.7345	33.6339	33.2267	33.5241
2042.62	31.4533	30.7147	33.1911	31.911	31.5289	26.5758	28.4048	30.7219	29.0619	31.2443	29.238	19.599	29.9812	30.084	26.7949	26.7699	30.6005	30.6613	31.2848	30.713	27.9731	28.7338	30.3445	30.2545	30.9421	30.2993	31.5237	30.9234	31.2249	29.9276	31.2058	31.6475	31.1901	31.6851	30.9264	32.1288	32.4795	32.5102	32.8314	32.0848	32.7496	33.3831	32.8239	33.2274	30.8412	31.4981	33.392	32.9879	33.2821
2044.54	31.2412	30.5113	32.9707	31.6871	31.314	26.3624	28.1909	30.5094	28.8548	31.032	29.0183	19.4037	29.7711	29.8723	26.593	26.5753	30.3905	30.4473	31.0715	30.5005	27.7534	28.5093	30.1253	30.0368	30.7282	30.0847	31.3094	30.7124	31.0112	29.7224	30.9746	31.4217	30.9675	31.4635	30.7093	31.9118	32.2622	32.2925	32.6056	31.869	32.5166	33.1615	32.6023	33.0007	30.6252	31.2889	33.1686	32.7713	33.0643
2046.47	31.02	30.2881	32.7422	31.4613	31.0915	26.1432	27.9678	30.2885	28.6351	30.8098	28.7904	19.2033	29.5515	29.6523	26.3813	26.3662	30.1684	30.226	30.8498	30.2808	27.5261	28.2827	29.8956	29.8095	30.4981	29.8625	31.0849	30.4925	30.7823	29.5123	30.7462	31.1856	30.7367	31.238	30.4845	31.6826	32.0359	32.065	32.3779	31.6451	32.2862	32.9262	32.3707	32.7675	30.4028	31.0688	32.9398	32.5447	32.8382
2048.4	30.8145	30.0653	32.5309	31.2553	30.8832	25.9377	27.7577	30.0807	28.4273	30.5993	28.5766	19.0152	29.3446	29.4464	26.1829	26.1717	29.9619	30.0204	30.6386	30.0721	27.311	28.0673	29.6813	29.5978	30.2757	29.6545	30.8706	30.2818	30.5748	29.3172	30.5296	30.9626	30.5185	31.0229	30.2756	31.4667	31.8189	31.8512	32.1606	31.4298	32.0657	32.7086	32.1554	32.5532	30.1913	30.8611	32.7276	32.3321	32.6263
2050.33	30.6037	29.8478	32.3119	31.0341	30.6679	25.7268	27.5435	29.8686	28.2132	30.3804	28.3579	18.8274	29.1331	29.2338	25.9795	25.9719	29.7474	29.8068	30.4241	29.858	27.0925	27.8472	29.4587	29.3819	30.0527	29.4386	30.6518	30.0669	30.371	29.1131	30.3026	30.7409	30.299	30.7974	30.061	31.2484	31.6012	31.6338	31.9418	31.2102	31.8319	32.4846	31.9349	32.3292	29.9737	30.6491	32.514	32.1182	32.4117
2052.26	30.4079	29.6543	32.1067	30.8237	30.4642	25.5287	27.342	29.6687	28.0151	30.1786	28.153	18.6521	28.936	29.0334	25.794	25.7848	29.5504	29.6063	30.2263	29.6619	26.8864	27.6374	29.2483	29.1789	29.8423	29.2375	30.4526	29.8683	30.1701	28.921	30.0895	30.5301	30.091	30.5861	29.8552	31.0439	31.3965	31.4309	31.7373	31.0109	31.619	32.2705	31.7278	32.1204	29.773	30.4551	32.3167	31.9233	32.2079
2054.19	30.2077	29.4461	31.8952	30.616	30.2568	25.3253	27.133	29.4629	27.8079	29.9736	27.941	18.4689	28.7348	28.8307	25.5993	25.5932	29.3485	29.3993	30.0208	29.458	26.673	27.4223	29.038	28.9581	29.6237	29.0331	30.2502	29.6625	29.9613	28.7241	29.8736	30.3158	29.8762	30.3738	29.6452	30.833	31.1849	31.2235	31.5215	30.8023	31.4005	32.0561	31.5144	31.9061	29.5662	30.2499	32.1098	31.7156	32.0009
2056.12	30.0189	29.2504	31.7004	30.4203	30.0644	25.136	26.94	29.2716	27.616	29.7789	27.7422	18.2977	28.5465	28.644	25.4129	25.4143	29.1595	29.2081	29.829	29.2696	26.4729	27.2251	28.8423	28.751	29.4208	28.8428	30.0626	29.4696	29.7768	28.5448	29.6692	30.1144	29.6761	30.1726	29.4542	30.6366	30.9874	31.0273	31.3238	30.6068	31.1927	31.8523	31.3154	31.7057	29.3717	30.0563	31.9139	31.5157	31.8111
2058.05	29.8261	29.0511	31.5004	30.2158	29.8675	24.9433	26.7425	29.0749	27.4197	29.5785	27.5407	18.1256	28.3542	28.4509	25.2251	25.2303	28.9645	29.0122	29.6322	29.0747	26.2694	27.0274	28.6411	28.547	29.2136	28.6463	29.8659	29.2752	29.585	28.3578	29.461	29.9089	29.4764	29.9668	29.2532	30.4357	30.7886	30.8239	31.1278	30.4098	30.9808	31.6457	31.114	31.4998	29.1736	29.8632	31.7113	31.3125	31.6142
2059.98	29.6505	28.8706	31.3168	30.0316	29.6849	24.7663	26.5617	28.8975	27.2382	29.3988	27.3553	17.9669	28.1798	28.2718	25.058	25.062	28.7864	28.8315	29.4531	28.896	26.0784	26.8401	28.4565	28.3583	29.0266	28.465	29.6808	29.098	29.3994	28.1841	29.2692	29.7189	29.2899	29.7807	29.0642	30.2473	30.6036	30.6376	30.9394	30.224	30.7888	31.4565	30.9263	31.3099	28.9927	29.6862	31.5278	31.13	31.4297
2061.9	29.4702	28.688	31.1321	29.8429	29.5037	24.5829	26.3804	28.7193	27.0605	29.2176	27.1676	17.8064	28.0037	28.095	24.8913	24.8999	28.6057	28.6506	29.2697	28.7158	25.8883	26.6502	28.2695	28.1725	28.8439	28.2839	29.4953	28.9206	29.2178	28.0138	29.0763	29.5268	29.0971	29.5895	28.8844	30.0572	30.4145	30.4486	30.7467	30.0362	30.5972	31.261	30.7374	31.1185	28.8107	29.5086	31.3453	30.9495	31.2434
2063.83	29.2943	28.5022	30.9476	29.6554	29.3231	24.4105	26.1959	28.543	26.8748	29.0346	26.9837	17.6502	27.8261	27.9222	24.7242	24.7325	28.4273	28.4723	29.091	28.5364	25.7072	26.4623	28.0832	27.9942	28.6641	28.1033	29.3097	28.7433	29.0431	27.8395	28.8881	29.3393	28.9099	29.4014	28.7054	29.8723	30.2291	30.262	30.5679	29.8563	30.4035	31.0729	30.5532	30.9265	28.6312	29.3295	31.1659	30.7694	31.0657
2065.76	29.1113	28.3113	30.7552	29.4686	29.1334	24.2343	26.0101	28.3595	26.6834	28.8469	26.7928	17.4888	27.6423	27.7378	24.5449	24.5504	28.2429	28.291	28.9117	28.3544	25.5242	26.2683	27.8908	27.8124	28.4828	27.9183	29.1194	28.5585	28.8573	27.6573	28.6955	29.1496	28.7253	29.2128	28.5159	29.6868	30.0443	30.0751	30.3842	29.6706	30.2037	30.8762	30.3624	30.7307	28.4481	29.1396	30.9781	30.5775	30.881
2067.69	28.9539	28.1483	30.59	29.3076	28.9739	24.0733	25.8543	28.2032	26.5338	28.6891	26.6273	17.3472	27.4873	27.5793	24.397	24.4071	28.0883	28.1367	28.757	28.2005	25.3563	26.1039	27.7239	27.6496	28.3206	27.7615	28.9624	28.402	28.6961	27.5142	28.528	28.9825	28.5607	29.0484	28.3577	29.5265	29.8864	29.9151	30.218	29.5124	30.0321	30.7043	30.1966	30.5633	28.2898	28.9862	30.8154	30.4181	30.7212
2069.62	28.7921	27.9841	30.4209	29.1353	28.8084	23.9095	25.6888	28.0407	26.3672	28.5249	26.4579	17.2036	27.3281	27.4167	24.2414	24.2581	27.9263	27.9711	28.5902	28.0363	25.1849	25.9355	27.5476	27.4726	28.1475	27.5955	28.8029	28.2386	28.5323	27.3613	28.3529	28.8087	28.3849	28.8765	28.1922	29.3585	29.7162	29.7501	30.0495	29.3494	29.8539	30.5288	30.0228	30.3909	28.1196	28.8245	30.6494	30.2559	30.5534
2071.55	28.6445	27.8445	30.2655	28.9788	28.6584	23.7605	25.5354	27.8884	26.2153	28.3733	26.3013	17.0718	27.1819	27.2677	24.0996	24.1185	27.7775	27.8201	28.4376	27.8888	25.0272	25.7733	27.3874	27.3122	27.9854	27.4452	28.6545	28.0877	28.384	27.2201	28.1889	28.6434	28.2211	28.7162	28.0357	29.2016	29.5615	29.5969	29.8911	29.1922	29.6891	30.3684	29.8662	30.2322	27.9668	28.6756	30.4949	30.1023	30.3994
2073.48	28.4906	27.6887	30.1049	28.8193	28.4998	23.6042	25.3769	27.7346	26.0577	28.2142	26.1392	16.9369	27.0301	27.1163	23.9554	23.9707	27.6203	27.6643	28.283	27.735	24.8624	25.608	27.2302	27.1505	27.8136	27.2918	28.4973	27.9334	28.2299	27.0738	28.0225	28.4747	28.0591	28.5568	27.8722	29.0396	29.4015	29.4361	29.7284	29.0279	29.5187	30.2018	29.7064	30.062	27.8112	28.5199	30.3328	29.9447	30.2397
2075.41	28.3502	27.5372	29.958	28.6712	28.3546	23.4608	25.2334	27.5961	25.9137	28.07	25.9925	16.8129	26.8916	26.9794	23.8246	23.8401	27.4795	27.5219	28.1443	27.5951	24.7117	25.4586	27.0832	27.0028	27.6649	27.1519	28.3526	27.793	28.085	26.9391	27.8677	28.3225	27.911	28.4089	27.7248	28.8903	29.2483	29.2893	29.5853	28.8869	29.364	30.0496	29.5583	29.9122	27.6671	28.3789	30.1879	29.802	30.0966
2077.33	28.2061	27.3817	29.806	28.5134	28.2023	23.3161	25.0841	27.4501	25.7621	27.9201	25.841	16.6855	26.7475	26.8332	23.6864	23.7035	27.3362	27.3752	28.0014	27.4505	24.561	25.3085	26.928	26.8481	27.5063	27.0051	28.2028	27.6478	27.9435	26.796	27.712	28.1683	27.7606	28.2515	27.5774	28.7384	29.0994	29.1384	29.4383	28.7412	29.2011	29.8906	29.4031	29.7597	27.5194	28.2345	30.0371	29.644	29.9452
2079.26	28.0797	27.2475	29.6735	28.3754	28.0694	23.1871	24.9532	27.3195	25.6284	27.7894	25.7044	16.5717	26.6193	26.7026	23.5629	23.5821	27.2072	27.2465	27.8703	27.3224	24.4256	25.1713	26.7864	26.7137	27.3565	26.8722	28.0669	27.5215	27.8201	26.6711	27.5707	28.0249	27.6285	28.1128	27.4451	28.6033	28.9669	29.0025	29.2992	28.6077	29.0556	29.7512	29.2656	29.6172	27.3885	28.1041	29.9027	29.5102	29.8141
2081.19	27.9462	27.1169	29.5371	28.2353	27.936	23.0534	24.8162	27.1856	25.4909	27.6549	25.5621	16.4562	26.488	26.5695	23.4371	23.455	27.0736	27.1122	27.7345	27.19	24.2852	25.0266	26.6432	26.5736	27.2084	26.7361	27.9268	27.3904	27.6836	26.5443	27.4263	27.877	27.4878	27.9744	27.3069	28.4627	28.8272	28.8618	29.1599	28.4751	28.9093	29.6045	29.126	29.468	27.2533	27.967	29.7684	29.3759	29.6759
2083.12	27.8312	26.996	29.4122	28.1133	27.8148	22.9342	24.6932	27.0667	25.3687	27.5342	25.4346	16.3503	26.3719	26.4519	23.3268	23.345	26.9542	26.9942	27.6169	27.0709	24.1579	24.9028	26.5188	26.4459	27.0907	26.6173	27.8076	27.2713	27.5651	26.4341	27.2971	27.7468	27.3569	27.8519	27.1862	28.3388	28.7025	28.7359	29.0358	28.356	28.7769	29.474	28.9995	29.3413	27.1321	27.8501	29.6507	29.2546	29.5563
2085.05	27.7118	26.8721	29.2814	27.9886	27.6858	22.8127	24.5695	26.9453	25.2456	27.4101	25.3066	16.2427	26.2533	26.3343	23.2149	23.2338	26.8337	26.8732	27.496	26.9496	24.0288	24.7755	26.3943	26.3174	26.9729	26.4962	27.6887	27.1484	27.4517	26.3194	27.1631	27.6163	27.226	27.7185	27.0625	28.2114	28.5747	28.609	28.9062	28.2258	28.6398	29.3431	28.8701	29.2111	27.0084	27.7266	29.5235	29.1309	29.436
2086.98	27.6067	26.7639	29.1707	27.8756	27.5777	22.7014	24.4573	26.8402	25.1369	27.3025	25.196	16.1486	26.1487	26.2309	23.1151	23.1361	26.7309	26.7677	27.3883	26.845	23.9131	24.6552	26.2818	26.203	26.8601	26.3889	27.5814	27.0424	27.3399	26.2196	27.0452	27.4982	27.1128	27.6017	26.9475	28.097	28.4598	28.4961	28.7917	28.1125	28.5211	29.2245	28.7579	29.0929	26.9007	27.6208	29.4134	29.0241	29.3279
2088.91	27.4949	26.6424	29.0559	27.7499	27.4628	22.5865	24.3367	26.729	25.0139	27.1861	25.077	16.0501	26.0356	26.1155	23.0076	23.0285	26.6177	26.6529	27.2744	26.7318	23.7913	24.5352	26.1613	26.0866	26.7433	26.2748	27.4661	26.9299	27.2128	26.1097	26.9247	27.3772	26.9984	27.4877	26.8272	27.9764	28.3443	28.3774	28.6769	27.9988	28.3958	29.1004	28.6372	28.9706	26.7834	27.5058	29.2963	28.9055	29.2119
2090.84	27.3941	26.541	28.9519	27.6465	27.3617	22.4879	24.2354	26.6278	24.9071	27.086	24.9695	15.9647	25.9381	26.0142	22.9152	22.9331	26.5213	26.5516	27.1775	26.6339	23.6852	24.4281	26.0548	25.9785	26.6439	26.1746	27.3622	26.831	27.1183	26.0139	26.8148	27.2699	26.8913	27.3848	26.7244	27.8708	28.2406	28.2768	28.5775	27.8965	28.2808	28.9925	28.5309	28.8649	26.6808	27.4013	29.1947	28.8023	29.1089
2092.77	27.2961	26.4407	28.8462	27.5457	27.2598	22.3868	24.1354	26.5283	24.8086	26.9868	24.8662	15.8772	25.8421	25.9157	22.8257	22.8443	26.4249	26.4538	27.0822	26.537	23.5819	24.3202	25.9441	25.8681	26.5403	26.0759	27.2563	26.7329	27.0337	25.9255	26.7026	27.1621	26.7854	27.2763	26.6249	27.7684	28.1367	28.1783	28.4728	27.7949	28.1691	28.8802	28.4254	28.7541	26.5826	27.3046	29.0964	28.7039	29.0068
2094.69	27.2167	26.3544	28.7585	27.4501	27.1729	22.3006	24.048	26.4434	24.7205	26.8999	24.7751	15.8004	25.76	25.8335	22.7486	22.7653	26.3408	26.3709	26.9957	26.4527	23.4873	24.2257	25.8483	25.7788	26.4428	25.9907	27.1711	26.649	26.9429	25.8462	26.6094	27.0671	26.6936	27.1831	26.5374	27.6782	28.0538	28.0896	28.3776	27.7098	28.0732	28.7858	28.3355	28.6599	26.4968	27.2215	29.0135	28.6179	28.9209
2096.62	27.1309	26.2624	28.6653	27.3521	27.0822	22.2112	23.9576	26.3572	24.628	26.8112	24.6808	15.7225	25.6753	25.7487	22.6677	22.685	26.2541	26.2839	26.9068	26.3664	23.3906	24.1271	25.7564	25.6841	26.3369	25.9008	27.0876	26.5653	26.8487	25.7615	26.5159	26.9712	26.5993	27.0918	26.4459	27.5851	27.9657	27.9964	28.2876	27.6204	27.9706	28.6847	28.2443	28.5656	26.4086	27.1335	28.9248	28.5291	28.8312
2098.55	27.0578	26.1872	28.5845	27.2766	27.0058	22.1342	23.8789	26.2858	24.5489	26.7374	24.6011	15.6591	25.6032	25.6767	22.5993	22.6193	26.1825	26.2107	26.834	26.2965	23.3077	24.0426	25.6764	25.6033	26.2544	25.8257	27.0138	26.493	26.7956	25.6927	26.4281	26.891	26.5152	27.0107	26.3666	27.5074	27.8833	27.9166	28.2128	27.5403	27.8818	28.6018	28.1649	28.485	26.3366	27.0595	28.8483	28.4536	28.7574
2100.48	26.9836	26.1139	28.5061	27.2027	26.9271	22.0555	23.7965	26.2096	24.4667	26.6592	24.5175	15.5941	25.5277	25.6008	22.5277	22.5492	26.1072	26.1315	26.7569	26.2227	23.2257	23.9597	25.5952	25.5252	26.1704	25.7507	26.9377	26.4164	26.7296	25.6225	26.341	26.8083	26.4309	26.9226	26.287	27.4267	27.8038	27.8352	28.1305	27.4642	27.7931	28.5184	28.0813	28.3999	26.2591	26.9816	28.7699	28.3747	28.6804
2102.41	26.9248	26.0443	28.4415	27.1373	26.8622	21.9917	23.7306	26.1478	24.4001	26.5966	24.4492	15.5383	25.4679	25.5408	22.4715	22.4921	26.0471	26.0687	26.6959	26.1623	23.1579	23.8919	25.5269	25.455	26.0957	25.6902	26.8793	26.3547	26.6548	25.5654	26.2712	26.737	26.365	26.8531	26.2207	27.3585	27.74	27.7704	28.0634	27.4014	27.7215	28.444	28.0156	28.33	26.1967	26.9212	28.7083	28.3118	28.6176
2104.34	26.8614	25.9695	28.3726	27.0616	26.7962	21.924	23.6631	26.0851	24.3319	26.5312	24.3789	15.4807	25.4057	25.477	22.415	22.4326	25.9846	26.0044	26.6339	26.0984	23.0865	23.8212	25.4558	25.3813	26.0274	25.6261	26.8168	26.2925	26.5927	25.5064	26.1995	26.6616	26.298	26.7899	26.1542	27.2892	27.6739	27.7032	27.9961	27.3295	27.6454	28.3738	27.9453	28.2575	26.1324	26.8557	28.6439	28.2449	28.551
2106.27	26.8113	25.9204	28.3188	27.0025	26.7454	21.8701	23.6085	26.0387	24.2763	26.4784	24.323	15.4354	25.3579	25.4279	22.3697	22.387	25.9322	25.9545	26.5865	26.0504	23.0219	23.7601	25.3962	25.3233	25.9693	25.5735	26.7625	26.2441	26.5487	25.4594	26.1391	26.6016	26.2401	26.7348	26.1023	27.234	27.617	27.6481	27.942	27.2732	27.5802	28.3174	27.8878	28.1981	26.0813	26.802	28.5936	28.1957	28.4973
2108.2	26.7589	25.8694	28.2629	26.9474	26.6895	21.8145	23.5515	25.9846	24.2177	26.4241	24.2654	15.3888	25.3065	25.3768	22.3227	22.3378	25.8794	25.9023	26.5351	25.9993	22.9593	23.6972	25.3347	25.2649	25.9139	25.5213	26.7043	26.1927	26.4862	25.411	26.0789	26.5389	26.1809	26.6706	26.0481	27.1768	27.559	27.5932	27.8878	27.2219	27.5175	28.2527	27.8294	28.1401	26.0251	26.7491	28.5402	28.1423	28.4429
2110.12	26.7252	25.8316	28.2227	26.9088	26.6484	21.7738	23.5111	25.9449	24.1745	26.3855	24.2231	15.3538	25.2697	25.341	22.2904	22.3043	25.8461	25.8634	26.4992	25.9632	22.916	23.6504	25.2888	25.2194	25.8761	25.483	26.664	26.1562	26.4411	25.3809	26.0319	26.4915	26.1364	26.6237	26.007	27.1343	27.5194	27.5494	27.8439	27.1807	27.4727	28.2078	27.7891	28.0957	25.9833	26.7125	28.5025	28.0982	28.4052
2112.05	26.6866	25.7905	28.1835	26.8614	26.6066	21.7315	23.4686	25.9078	24.1283	26.3451	24.1782	15.3162	25.2318	25.3029	22.2554	22.2689	25.808	25.8258	26.461	25.9246	22.867	23.6073	25.2407	25.1748	25.8347	25.4422	26.6268	26.1167	26.4062	25.3455	25.9815	26.4418	26.0938	26.5818	25.9647	27.0913	27.4777	27.5058	27.7991	27.1348	27.4206	28.1595	27.748	28.0466	25.9425	26.6712	28.462	28.0564	28.3664
2113.98	26.6636	25.7642	28.1576	26.8297	26.5814	21.703	23.4378	25.8842	24.0956	26.319	24.146	15.2914	25.2085	25.2786	22.2312	22.2475	25.7832	25.8043	26.4354	25.8986	22.8306	23.5773	25.207	25.143	25.8046	25.4153	26.608	26.0903	26.3845	25.3192	25.9448	26.4081	26.0625	26.5537	25.9332	27.0595	27.446	27.4746	27.7699	27.109	27.3834	28.1256	27.7174	28.0151	25.9183	26.6438	28.4326	28.0316	28.3431
2115.91	26.6367	25.7291	28.1259	26.7933	26.5554	21.6724	23.4062	25.856	24.061	26.2897	24.1099	15.2646	25.1841	25.2504	22.2075	22.221	25.7583	25.7751	26.4106	25.8709	22.7942	23.5405	25.1758	25.1082	25.7661	25.3864	26.5824	26.0654	26.3507	25.2889	25.9103	26.3727	26.0293	26.5188	25.9011	27.0265	27.4127	27.4425	27.7375	27.0813	27.3436	28.0876	27.6812	27.9797	25.8902	26.6139	28.4027	28.0053	28.3137
2117.84	26.6262	25.708	28.1125	26.7795	26.5399	21.6532	23.388	25.8445	24.0466	26.2788	24.0911	15.2492	25.1746	25.2375	22.1978	22.2124	25.7466	25.7606	26.4021	25.8613	22.7768	23.5179	25.1586	25.0872	25.7463	25.3732	26.5638	26.0562	26.335	25.2808	25.8898	26.3515	26.0104	26.5032	25.8856	27.01	27.399	27.4272	27.7216	27.0651	27.3215	28.0696	27.6684	27.9617	25.876	26.6018	28.3934	27.9921	28.3039
2119.77	26.6122	25.6923	28.0951	26.7664	26.5172	21.634	23.3656	25.8293	24.0233	26.2646	24.072	15.2319	25.159	25.2235	22.1859	22.1982	25.7305	25.7446	26.3853	25.8503	22.7534	23.492	25.1341	25.0642	25.7205	25.3556	26.5421	26.0396	26.3315	25.2682	25.867	26.3296	25.9898	26.486	25.8658	26.9913	27.3815	27.4098	27.7063	27.0487	27.2958	28.0485	27.6525	27.9409	25.8576	26.5854	28.3805	27.9715	28.2872
2121.7	26.6134	25.6909	28.0925	26.7562	26.5177	21.6292	23.3596	25.8288	24.0152	26.2648	24.0669	15.2277	25.1578	25.2241	22.1879	22.1978	25.7301	25.7443	26.3865	25.8519	22.7429	23.4798	25.1245	25.0554	25.7071	25.356	26.5414	26.0385	26.3424	25.2695	25.8556	26.3198	25.9848	26.476	25.8644	26.9864	27.3758	27.4078	27.7052	27.0454	27.2871	28.0382	27.6455	27.9351	25.8553	26.5836	28.3816	27.9715	28.2851
2123.63	26.6151	25.6867	28.0883	26.7471	26.5156	21.6217	23.3526	25.8264	24.0034	26.2593	24.0559	15.2223	25.1547	25.2216	22.185	22.1938	25.7288	25.7419	26.3845	25.8493	22.7314	23.4708	25.1165	25.0446	25.7	25.3522	26.5399	26.0361	26.3373	25.2682	25.8433	26.3061	25.9756	26.4673	25.8608	26.9774	27.3738	27.4012	27.6983	27.0367	27.2741	28.0231	27.636	27.9222	25.8513	26.5788	28.3782	27.9696	28.2817
2125.56	26.6278	25.6992	28.0952	26.7598	26.5235	21.6265	23.3596	25.838	24.0067	26.2688	24.0627	15.227	25.1654	25.2324	22.1967	22.2056	25.7405	25.7547	26.3947	25.8613	22.7308	23.4743	25.1227	25.0552	25.6968	25.3607	26.55	26.0494	26.3448	25.2838	25.8486	26.3074	25.9792	26.4773	25.8676	26.9851	27.3874	27.4104	27.708	27.0482	27.2757	28.0329	27.6474	27.9296	25.8639	26.588	28.3908	27.9837	28.2927
2127.48	26.6372	25.7071	28.1024	26.7672	26.5298	21.6303	23.3625	25.8462	24.0074	26.2766	24.0677	15.2302	25.1754	25.2401	22.2079	22.2114	25.7492	25.7616	26.405	25.872	22.7259	23.4746	25.127	25.0604	25.6963	25.3681	26.5605	26.0592	26.36	25.2955	25.8511	26.313	25.9855	26.4841	25.8759	26.9922	27.3985	27.4191	27.7142	27.0543	27.278	28.0378	27.6536	27.9355	25.8721	26.5957	28.3994	27.9907	28.3023
2129.41	26.6641	25.7303	28.1253	26.7894	26.5536	21.649	23.3816	25.8691	24.0243	26.2996	24.0865	15.2467	25.2006	25.2664	22.2325	22.2351	25.7704	25.786	26.4311	25.8979	22.7401	23.4874	25.1432	25.0772	25.7237	25.3914	26.5894	26.083	26.3839	25.3218	25.8663	26.3345	26.0058	26.5019	25.8979	27.0142	27.4154	27.4402	27.735	27.0721	27.2922	28.0556	27.6736	27.952	25.8954	26.6212	28.4199	28.0167	28.3309
2131.34	26.6891	25.7453	28.1479	26.8087	26.5722	21.6661	23.3988	25.8905	24.0403	26.3229	24.1045	15.2623	25.2245	25.2905	22.2555	22.2594	25.7935	25.8107	26.4541	25.9221	22.7581	23.5022	25.16	25.0901	25.7443	25.4141	26.6141	26.1087	26.4009	25.3452	25.8805	26.3548	26.0251	26.5206	25.9182	27.0343	27.4352	27.4586	27.7574	27.0947	27.3022	28.072	27.6917	27.9689	25.9159	26.6407	28.4423	28.0396	28.3538
2133.27	26.7236	25.7788	28.1854	26.8353	26.6079	21.699	23.4303	25.9283	24.0729	26.3596	24.1349	15.2884	25.2618	25.3256	22.2921	22.2961	25.8313	25.8483	26.4942	25.9639	22.7851	23.5338	25.1875	25.1106	25.7735	25.448	26.6503	26.1501	26.4386	25.3828	25.9099	26.3832	26.0574	26.558	25.9514	27.0668	27.4741	27.4922	27.8008	27.1306	27.3333	28.1033	27.7257	28.0041	25.9515	26.6767	28.4809	28.0771	28.3892
2135.2	26.756	25.8132	28.2151	26.862	26.6387	21.7289	23.4568	25.9624	24.0981	26.3921	24.1626	15.3123	25.2948	25.3584	22.326	22.3252	25.8677	25.8792	26.5309	25.9996	22.8069	23.5613	25.2095	25.1334	25.803	25.4795	26.6786	26.1838	26.4772	25.4168	25.9386	26.4069	26.086	26.5886	25.9793	27.0973	27.5072	27.5218	27.8349	27.1574	27.3607	28.1315	27.7559	28.0302	25.9852	26.7065	28.5167	28.1101	28.4215
2137.13	26.8056	25.8617	28.2582	26.9184	26.6836	21.7693	23.4954	26.0062	24.1354	26.4381	24.2027	15.3475	25.3412	25.4047	22.3725	22.3662	25.9166	25.9255	26.5799	26.0446	22.8442	23.5986	25.2541	25.1737	25.8474	25.5284	26.7208	26.2307	26.5215	25.4615	25.9778	26.445	26.1295	26.6271	26.0228	27.1407	27.5471	27.5658	27.8711	27.1985	27.3972	28.173	27.798	28.0714	26.0307	26.7498	28.5655	28.1539	28.4691
2139.06	26.8528	25.9073	28.3029	26.9594	26.7306	21.8071	23.5345	26.0507	24.172	26.4825	24.2419	15.3825	25.385	25.4492	22.4167	22.4094	25.9627	25.9713	26.6271	26.0906	22.8853	23.6353	25.2995	25.2193	25.8961	25.5737	26.7654	26.2768	26.5584	25.5058	26.0161	26.4852	26.1723	26.6651	26.0691	27.1836	27.5875	27.6111	27.913	27.2411	27.4338	28.2149	27.8413	28.1148	26.0746	26.7926	28.6144	28.1989	28.5147
2140.99	26.9167	25.9596	28.3642	27.0053	26.791	21.8606	23.5891	26.1109	24.224	26.5417	24.2946	15.4273	25.4449	25.5082	22.4753	22.4673	26.0231	26.0317	26.69	26.1543	22.9338	23.6829	25.3489	25.2783	25.9481	25.6318	26.8264	26.3376	26.6308	25.5674	26.0709	26.5413	26.2271	26.7209	26.1285	27.2397	27.6473	27.6707	27.9711	27.3011	27.4852	28.2708	27.902	28.1714	26.1327	26.8461	28.6775	28.2599	28.5749
2142.91	26.98	26.0105	28.4252	27.0648	26.8457	21.914	23.6416	26.1688	24.2741	26.6	24.346	15.4714	25.5068	25.5679	22.5325	22.5222	26.0805	26.091	26.7495	26.2152	22.9769	23.7331	25.3973	25.3313	25.9916	25.6886	26.8875	26.3958	26.698	25.6239	26.1235	26.5938	26.283	26.7768	26.1858	27.2963	27.7065	27.7308	28.0314	27.3609	27.5384	28.3227	27.9591	28.2275	26.1892	26.9018	28.7362	28.3156	28.6355
2144.84	27.0537	26.0858	28.4954	27.1402	26.9158	21.9789	23.7067	26.239	24.3368	26.6721	24.4127	15.5265	25.5793	25.6398	22.6043	22.5911	26.1531	26.1638	26.8209	26.2859	23.0365	23.7978	25.4642	25.3965	26.054	25.7592	26.9608	26.4683	26.7613	25.6948	26.188	26.656	26.3503	26.8442	26.252	27.3672	27.7787	27.8007	28.1062	27.4296	27.6056	28.3904	28.0271	28.2978	26.2587	26.9739	28.8081	28.3869	28.7057
2146.77	27.1239	26.155	28.5629	27.206	26.988	22.0396	23.7702	26.3104	24.3991	26.7413	24.4782	15.5815	25.6496	25.7098	22.6748	22.6577	26.2282	26.2333	26.8924	26.356	23.1012	23.8627	25.5313	25.4573	26.12	25.8312	27.0338	26.54	26.8314	25.7677	26.2544	26.7198	26.4172	26.9116	26.3234	27.434	27.8485	27.8673	28.173	27.4966	27.6669	28.4585	28.0947	28.3629	26.3283	27.0406	28.8808	28.4603	28.7775
2148.7	27.208	26.236	28.6461	27.2903	27.0662	22.1134	23.8465	26.3924	24.4773	26.8234	24.5549	15.6464	25.7328	25.7925	22.7548	22.7344	26.3127	26.3146	26.9765	26.4419	23.1743	23.937	25.6094	25.5273	26.1972	25.9133	27.119	26.6248	26.9245	25.8518	26.3307	26.7973	26.4955	26.9972	26.4057	27.5138	27.9291	27.9505	28.2489	27.5767	27.7436	28.5372	28.1764	28.4423	26.4126	27.1225	28.9689	28.5473	28.8674
2150.63	27.2891	26.3155	28.7282	27.3674	27.1428	22.1887	23.9208	26.4703	24.5504	26.906	24.6307	15.7106	25.8123	25.8724	22.8354	22.8084	26.3915	26.394	27.06	26.5272	23.2455	24.0066	25.6823	25.6044	26.2665	25.9925	27.196	26.7073	27.0008	25.93	26.4012	26.8747	26.5724	27.0787	26.4826	27.5961	28.0122	28.0325	28.3289	27.6587	27.8207	28.6152	28.2569	28.5224	26.4942	27.2009	29.0534	28.6284	28.9503
2152.56	27.3873	26.4067	28.8228	27.4511	27.2376	22.2761	24.0098	26.5644	24.6338	27.0014	24.7199	15.7857	25.9039	25.9659	22.9283	22.8968	26.4832	26.4881	27.1573	26.6244	23.3286	24.0924	25.7674	25.6948	26.3573	26.086	27.2878	26.8026	27.0854	26.02	26.4884	26.9624	26.6639	27.1663	26.575	27.6915	28.1095	28.1244	28.4234	27.7529	27.9103	28.7076	28.3471	28.6123	26.5866	27.2939	29.147	28.7222	29.0438
2154.49	27.4829	26.4984	28.9151	27.55	27.328	22.361	24.0965	26.6575	24.7143	27.0917	24.8065	15.8583	25.9962	26.0581	23.0147	22.9818	26.575	26.5805	27.2484	26.7156	23.4118	24.1811	25.8524	25.7811	26.4449	26.177	27.3832	26.8984	27.1833	26.1106	26.5807	27.0499	26.7556	27.2542	26.6654	27.7804	28.2033	28.2149	28.5152	27.8408	27.9946	28.7965	28.4339	28.6988	26.6777	27.3832	29.2395	28.813	29.1356
2156.42	27.5908	26.6059	29.0202	27.6606	27.4319	22.4568	24.1947	26.761	24.8102	27.1947	24.9038	15.9414	26.1029	26.1625	23.1124	23.0789	26.6786	26.6875	27.3513	26.8204	23.506	24.2794	25.952	25.8797	26.5486	26.2806	27.4919	27.0041	27.2906	26.2163	26.6812	27.1526	26.8584	27.3596	26.7655	27.8837	28.309	28.3203	28.6215	27.943	28.0947	28.8997	28.541	28.806	26.7829	27.4846	29.3473	28.9198	29.2447
2158.35	27.6955	26.7095	29.1223	27.7508	27.5356	22.5509	24.2934	26.8653	24.9072	27.2993	25.0019	16.0255	26.2059	26.2641	23.2146	23.1768	26.7838	26.7919	27.4584	26.9243	23.5988	24.3728	26.0529	25.9818	26.6553	26.3821	27.5981	27.1078	27.3862	26.321	26.7794	27.2571	26.9574	27.4646	26.8649	27.9888	28.4155	28.4246	28.7219	28.047	28.1946	29.0005	28.6471	28.9087	26.8873	27.5862	29.4534	29.0251	29.3512
2160.27	27.8121	26.8193	29.2405	27.8645	27.6495	22.6566	24.4037	26.983	25.0132	27.4174	25.1135	16.1204	26.3204	26.3802	23.3302	23.2885	26.9024	26.9072	27.5793	27.0441	23.7102	24.4749	26.1631	26.0935	26.7699	26.4965	27.7138	27.2272	27.5034	26.437	26.8922	27.3684	27.071	27.5756	26.9784	28.1046	28.5286	28.5424	28.8395	28.1636	28.3063	29.1156	28.7611	29.0191	27.0039	27.7017	29.5739	29.1418	29.4674
2162.2	27.9281	26.9288	29.3601	27.9859	27.7603	22.7641	24.5122	27.0975	25.1175	27.5333	25.2228	16.2141	26.4336	26.4939	23.4384	23.3953	27.0196	27.0229	27.6955	27.1613	23.8197	24.5815	26.2712	26.2051	26.8874	26.6094	27.8287	27.344	27.6304	26.5486	27.001	27.4784	27.1844	27.6889	27.091	28.2191	28.6444	28.6587	28.9588	28.2789	28.4167	29.2279	28.8734	29.1343	27.1171	27.8113	29.6921	29.2558	29.5843
2164.13	28.0577	27.062	29.49	28.1095	27.888	22.8823	24.6326	27.2255	25.2392	27.6606	25.3433	16.3173	26.5607	26.6193	23.5593	23.5138	27.1484	27.1503	27.8253	27.2883	23.9359	24.7018	26.391	26.3298	27.0129	26.7349	27.9565	27.4703	27.7602	26.6735	27.1182	27.6051	27.3069	27.8196	27.2132	28.3453	28.7752	28.7849	29.0824	28.4079	28.5408	29.3539	29.0042	29.2633	27.2452	27.9344	29.8214	29.3802	29.7165
2166.06	28.188	27.1879	29.6137	28.2293	28.0128	22.995	24.7497	27.3479	25.3566	27.783	25.4628	16.4205	26.6844	26.7434	23.6808	23.6301	27.2747	27.2724	27.9537	27.4136	24.05	24.8176	26.5117	26.4501	27.1271	26.8585	28.0816	27.5964	27.8792	26.7973	27.2379	27.7304	27.4296	27.9471	27.3349	28.4675	28.8983	28.9089	29.2046	28.53	28.6613	29.4808	29.1307	29.3805	27.3713	28.0557	29.9475	29.5038	29.8402
2167.99	28.3292	27.3147	29.7478	28.3677	28.1471	23.1211	24.8791	27.482	25.4822	27.9164	25.5924	16.5323	26.8185	26.8794	23.8142	23.7584	27.4102	27.4093	28.0922	27.5509	24.176	24.9474	26.6468	26.5774	27.2551	26.9958	28.2157	27.7355	28.02	26.9285	27.373	27.866	27.5641	28.0811	27.4691	28.6026	29.0329	29.0433	29.3444	28.6603	28.7934	29.6162	29.2623	29.5134	27.5056	28.1898	30.0842	29.6453	29.9745
2169.92	28.4635	27.4445	29.8821	28.4946	28.2793	23.2469	25.0056	27.6152	25.6044	28.0491	25.7198	16.6424	26.9515	27.0117	23.9417	23.8827	27.5429	27.5452	28.2282	27.6854	24.305	25.0751	26.7773	26.701	27.3857	27.1304	28.3478	27.8693	28.1627	27.0563	27.5047	27.9976	27.6996	28.2117	27.6013	28.7361	29.1651	29.1784	29.4815	28.7921	28.925	29.7467	29.3953	29.6514	27.6369	28.3199	30.2183	29.7771	30.1118
2171.85	28.6095	27.5935	30.0324	28.6401	28.4226	23.3829	25.1423	27.7608	25.7401	28.1958	25.8597	16.7623	27.0983	27.1582	24.0821	24.0178	27.6924	27.6902	28.3758	27.8348	24.4417	25.2144	26.9148	26.8424	27.53	27.2739	28.5019	28.0168	28.3026	27.1985	27.6439	28.139	27.8443	28.3583	27.7425	28.883	29.3089	29.3257	29.6215	28.9351	29.0637	29.8912	29.5447	29.7938	27.7819	28.4595	30.3678	29.9207	30.263
2173.78	28.7529	27.7407	30.1802	28.793	28.5643	23.5141	25.2827	27.9068	25.8755	28.3396	25.9988	16.8803	27.2396	27.3032	24.2198	24.1506	27.8366	27.8335	28.5213	27.9811	24.5746	25.3545	27.052	26.9797	27.6648	27.4178	28.6543	28.1645	28.4393	27.3399	27.7833	28.28	27.9862	28.5028	27.8811	29.0288	29.4559	29.4712	29.7696	29.0758	29.2026	30.0325	29.6868	29.9348	27.9277	28.6019	30.5159	30.069	30.4071
2175.7	28.9096	27.8938	30.3344	28.9421	28.7194	23.6575	25.4359	28.0636	26.0214	28.4979	26.1504	17.0093	27.3941	27.4575	24.3704	24.2973	27.9901	27.9907	28.6796	28.1381	24.7232	25.5031	27.2042	27.1313	27.8148	27.574	28.8092	28.3238	28.6013	27.4917	27.9349	28.4333	28.1404	28.6548	28.0402	29.1854	29.6139	29.6287	29.9322	29.2325	29.3595	30.1887	29.8425	30.0944	28.0846	28.7552	30.6776	30.2281	30.5677
2177.63	29.066	28.0454	30.4856	29.0915	28.8727	23.8008	25.5835	28.2182	26.1645	28.6529	26.3	17.1374	27.5487	27.61	24.5212	24.4437	28.1425	28.1462	28.8341	28.291	24.8722	25.6524	27.3545	27.2887	27.9703	27.728	28.9589	28.4812	28.7578	27.6411	28.0871	28.5874	28.2935	28.8085	28.195	29.3419	29.7692	29.7832	30.0879	29.3922	29.5141	30.3413	30.0004	30.247	28.2369	28.9051	30.8343	30.3851	30.7281
2179.56	29.231	28.2089	30.6538	29.2662	29.0392	23.9556	25.7398	28.3824	26.3197	28.8168	26.4591	17.2746	27.7114	27.7718	24.6823	24.6008	28.3088	28.3123	29	28.4576	25.0286	25.81	27.5116	27.449	28.1397	27.893	29.121	28.6474	28.9119	27.8021	28.2469	28.7503	28.458	28.9773	28.3528	29.5081	29.9316	29.9463	30.2571	29.5568	29.6733	30.507	30.169	30.4105	28.4026	29.0698	31.0002	30.5539	30.8954
2181.49	29.395	28.3691	30.8192	29.4244	29.2018	24.1086	25.8957	28.5431	26.4716	28.9777	26.6134	17.4106	27.8711	27.9319	24.8382	24.749	28.4719	28.4736	29.161	28.6205	25.1781	25.9654	27.6679	27.6048	28.3001	28.0533	29.2864	28.8078	29.0718	27.96	28.4043	28.9087	28.6198	29.1383	28.5162	29.6686	30.0977	30.1076	30.4195	29.719	29.8327	30.6687	30.3305	30.5725	28.5651	29.227	31.1647	30.713	31.0596
2183.42	29.572	28.5477	30.9919	29.5889	29.3746	24.2687	26.0609	28.7144	26.6333	29.148	26.7782	17.5555	28.0411	28.1027	25.0052	24.9094	28.6446	28.6463	29.3344	28.7948	25.3395	26.1318	27.8385	27.7711	28.4676	28.2259	29.4611	28.982	29.255	28.1272	28.5737	29.075	28.7946	29.3084	28.6889	29.8373	30.273	30.2809	30.5904	29.8884	30.0097	30.8398	30.5035	30.7432	28.7357	29.391	31.3418	30.8832	31.2326
2185.35	29.742	28.7194	31.161	29.7608	29.5432	24.4272	26.223	28.8857	26.7898	29.3179	26.9415	17.6985	28.2096	28.2708	25.1663	25.0661	28.8163	28.818	29.5084	28.9646	25.5049	26.292	28.0054	27.9353	28.6398	28.3948	29.6325	29.1532	29.432	28.2949	28.7425	29.2431	28.9647	29.4817	28.851	30.0068	30.4448	30.4538	30.7648	30.0509	30.1771	31.0095	30.6751	30.911	28.9035	29.5524	31.5166	31.0531	31.402
2187.28	29.9234	28.8942	31.3428	29.9393	29.7168	24.5966	26.3978	29.0653	26.9594	29.4985	27.1174	17.8489	28.3906	28.4505	25.3345	25.2319	28.9996	29.0014	29.6934	29.1446	25.6779	26.4604	28.1784	28.1128	28.8235	28.5733	29.8178	29.3338	29.6038	28.47	28.9162	29.4232	29.1413	29.6679	29.0226	30.1897	30.6296	30.6357	30.955	30.2285	30.354	31.1869	30.857	31.093	29.0859	29.7299	31.6975	31.2323	31.5854
2189.21	30.1056	29.0682	31.5243	30.1135	29.8914	24.7619	26.5719	29.2399	27.1273	29.6752	27.2926	17.9988	28.5688	28.6269	25.5067	25.3982	29.1816	29.1811	29.8724	29.322	25.8474	26.6314	28.3514	28.2876	28.9958	28.751	30.004	29.5162	29.781	28.6404	29.0896	29.605	29.3206	29.8504	29.1974	30.3685	30.8088	30.8145	31.1358	30.4075	30.5322	31.3661	31.0348	31.2729	29.2652	29.9071	31.8756	31.4118	31.7668
2191.13	30.2981	29.2571	31.7174	30.3105	30.0836	24.9385	26.754	29.4277	27.3068	29.8639	27.4769	18.158	28.7572	28.8157	25.6917	25.578	29.3721	29.3695	30.0609	29.5111	26.0257	26.8138	28.5379	28.4766	29.1738	28.9374	30.1985	29.7069	29.9844	28.8249	29.2781	29.7967	29.5095	30.037	29.3895	30.556	30.9959	31.0064	31.3261	30.5987	30.7214	31.556	31.2239	31.4614	29.4534	30.0933	32.069	31.6043	31.9561
2193.06	30.4855	29.4475	31.9056	30.497	30.2692	25.1136	26.9338	29.617	27.4858	30.05	27.6589	18.3181	28.9427	29.0025	25.8745	25.7548	29.5555	29.5554	30.2502	29.7022	26.2061	26.9945	28.7232	28.6614	29.3565	29.1208	30.3813	29.8929	30.1737	29.0103	29.4639	29.9852	29.6962	30.2266	29.5727	30.7444	31.182	31.1946	31.5194	30.7888	30.9084	31.7428	31.4123	31.6464	29.6396	30.2757	32.2604	31.7929	32.1449
2194.99	30.6802	29.6452	32.1039	30.6805	30.4605	25.2972	27.1236	29.8138	27.6716	30.2458	27.8515	18.4886	29.136	29.1988	26.0684	25.94	29.7515	29.7492	30.4478	29.8998	26.3977	27.1823	28.9161	28.8499	29.5525	29.3161	30.5707	30.0902	30.3623	29.2006	29.6564	30.1779	29.8943	30.4267	29.7616	30.9416	31.3765	31.3895	31.7172	30.9834	31.1046	31.9413	31.612	31.8416	29.8369	30.4675	32.4579	31.9923	32.345
2196.92	30.8737	29.837	32.2981	30.8739	30.65	25.4793	27.3097	30.003	27.8535	30.4368	28.0389	18.6553	29.3252	29.3903	26.256	26.1223	29.9436	29.9422	30.6436	30.0916	26.5849	27.3724	29.1025	29.0333	29.7451	29.5098	30.7586	30.2853	30.5585	29.389	29.8474	30.3678	30.0869	30.6189	29.9514	31.1344	31.5718	31.5811	31.9159	31.1703	31.2935	32.1333	31.8054	32.0315	30.0318	30.6572	32.6536	32.1838	32.5399
2198.85	31.0795	30.0414	32.5003	31.0844	30.8515	25.6715	27.5066	30.2054	28.0438	30.6369	28.236	18.8273	29.5251	29.5894	26.4473	26.3087	30.1476	30.1451	30.8482	30.2942	26.7801	27.5705	29.2988	29.2281	29.9428	29.7124	30.967	30.4871	30.7629	29.5857	30.0478	30.5707	30.2878	30.8226	30.1494	31.3345	31.7744	31.7833	32.1234	31.3729	31.4973	32.3318	32.0061	32.2351	30.234	30.8569	32.8591	32.3845	32.7442
2200.78	31.2812	30.2349	32.6971	31.2799	31.0485	25.8559	27.6986	30.4049	28.2293	30.8364	28.4308	18.9987	29.7219	29.7855	26.6378	26.4919	30.3459	30.3454	31.0479	30.4944	26.9718	27.765	29.492	29.4226	30.1412	29.9093	31.1754	30.6852	30.9562	29.7775	30.2484	30.7762	30.4886	31.0284	30.3381	31.5304	31.9704	31.9846	32.3278	31.5731	31.6951	32.5306	32.2057	32.4321	30.4309	31.0509	33.0621	32.5859	32.9458
2202.71	31.4903	30.4383	32.9072	31.4829	31.2576	26.0516	27.9005	30.6127	28.427	31.0434	28.6324	19.1775	29.9286	29.9906	26.8375	26.6865	30.5518	30.5553	31.255	30.7019	27.1715	27.9711	29.6922	29.6325	30.3519	30.1156	31.3817	30.8949	31.1605	29.9789	30.4539	30.9915	30.695	31.2455	30.5368	31.738	32.1827	32.1934	32.537	31.7791	31.9016	32.7409	32.4187	32.6335	30.6408	31.2532	33.275	32.7937	33.1554
2204.64	31.6957	30.6409	33.116	31.6885	31.4596	26.2464	28.1006	30.8207	28.6204	31.2468	28.8322	19.3557	30.1335	30.194	27.0334	26.8801	30.7588	30.7615	31.4609	30.907	27.3722	28.1716	29.8957	29.8384	30.5609	30.3206	31.5877	31.1051	31.3741	30.178	30.6571	31.1991	30.9018	31.455	30.7419	31.9446	32.3974	32.402	32.745	31.9832	32.1115	32.9464	32.6265	32.8391	30.8476	31.4517	33.4777	32.9963	33.3646
2206.57	31.9118	30.8552	33.3318	31.8965	31.6715	26.447	28.3103	31.0355	28.8243	31.4596	29.043	19.5429	30.348	30.4073	27.2421	27.0843	30.9738	30.9761	31.6752	31.1204	27.5853	28.3791	30.1093	30.0474	30.7775	30.534	31.8042	31.3243	31.5905	30.3841	30.8722	31.412	31.1161	31.6698	30.9588	32.1606	32.6116	32.6182	32.9599	32.2006	32.3271	33.1639	32.8423	33.0595	31.0631	31.6639	33.6936	33.2117	33.5833
2208.49	32.1217	31.0718	33.5442	32.1112	31.8855	26.6455	28.5169	31.2444	29.0261	31.6725	29.252	19.7289	30.5588	30.6168	27.451	27.2844	31.1855	31.1857	31.8876	31.3298	27.7913	28.5853	30.3181	30.2583	30.9918	30.7446	32.0174	31.5362	31.7949	30.586	31.084	31.6228	31.3272	31.8841	31.1672	32.3741	32.823	32.8317	33.1699	32.4116	32.5371	33.3752	33.0563	33.2695	31.2743	31.8738	33.9091	33.4225	33.7935
2210.42	32.34	31.299	33.7643	32.3429	32.1045	26.8543	28.7312	31.4642	29.2358	31.8957	29.4708	19.9218	30.7764	30.8365	27.6661	27.4935	31.4055	31.4059	32.112	31.5508	28	28.802	30.5364	30.4751	31.211	30.966	32.238	31.7546	32.0163	30.796	31.3007	31.8443	31.5472	32.1035	31.3866	32.594	33.0492	33.0518	33.3957	32.6311	32.7636	33.5964	33.2803	33.4894	31.4948	32.0901	34.1304	33.6457	34.014
2212.35	32.557	31.5184	33.98	32.5543	32.3159	27.0609	28.9423	31.6801	29.4414	32.1136	29.6858	20.1125	30.9914	31.0552	27.8734	27.6984	31.6231	31.6208	32.3333	31.7707	28.2104	29.0214	30.7511	30.6838	31.4239	31.1844	32.4515	31.9713	32.2396	31.0053	31.5137	32.0622	31.7644	32.3165	31.6048	32.8118	33.2686	33.2676	33.6138	32.8508	32.9812	33.8076	33.5004	33.7075	31.7122	32.3035	34.3487	33.8639	34.2341
2214.28	32.7822	31.7335	34.2066	32.7712	32.538	27.2739	29.1604	31.9045	29.6555	32.3369	29.9055	20.3103	31.2142	31.2787	28.0889	27.9095	31.8459	31.8447	32.5606	31.9988	28.4314	29.2417	30.9683	30.9042	31.6426	31.4093	32.6783	32.1975	32.4615	31.226	31.7354	32.2861	31.9907	32.5435	31.8242	33.0386	33.4919	33.4923	33.8392	33.0775	33.1993	34.0292	33.7236	33.9295	31.9374	32.5227	34.5772	34.0842	34.4604
2216.21	33.0025	31.9438	34.4321	32.9964	32.7529	27.4811	29.3748	32.1239	29.8645	32.5524	30.1213	20.5051	31.4325	31.4961	28.3056	28.1158	32.0631	32.0665	32.7839	32.2202	28.6505	29.4546	31.1829	31.1214	31.8613	31.6286	32.904	32.4176	32.6774	31.4412	31.9564	32.506	32.2126	32.7725	32.0343	33.2597	33.7118	33.7144	34.066	33.3003	33.422	34.2546	33.9453	34.1489	32.1565	32.7346	34.8019	34.3035	34.6846
2218.14	33.2303	32.174	34.6618	33.2263	32.9786	27.6988	29.5992	32.3518	30.0793	32.7801	30.3473	20.7057	31.6592	31.7236	28.5283	28.3282	32.2913	32.2958	33.0118	32.4485	28.8741	29.6767	31.4101	31.3487	32.0885	31.8539	33.1338	32.6462	32.908	31.6621	32.1833	32.7344	32.4405	33.0055	32.2557	33.4866	33.9419	33.9442	34.2993	33.5287	33.6529	34.483	34.1791	34.3791	32.383	32.9559	35.0318	34.5316	34.9157
2220.07	33.4583	32.4066	34.887	33.446	33.2017	27.9132	29.8214	32.5772	30.2905	33.0065	30.5713	20.9058	31.8811	31.9458	28.7438	28.5378	32.5184	32.522	33.2381	32.6733	29.0927	29.9006	31.6352	31.5726	32.3144	32.0762	33.3593	32.8733	33.13	31.8799	32.406	32.9614	32.6687	33.2292	32.485	33.711	34.1713	34.1689	34.5252	33.7492	33.8719	34.7047	34.4064	34.602	32.6084	33.1764	35.257	34.7567	35.142
2222	33.6955	32.6432	35.1243	33.6798	33.4334	28.1331	30.0493	32.8087	30.5141	33.2415	30.8012	21.1144	32.114	32.1777	28.9664	28.7595	32.7575	32.7566	33.4746	32.9075	29.3205	30.1314	31.8691	31.8064	32.5444	32.308	33.5939	33.1105	33.3673	32.1034	32.6351	33.1941	32.9034	33.4624	32.7171	33.9451	34.4038	34.4048	34.7583	33.9776	34.1075	34.9407	34.6414	34.8329	32.8435	33.4046	35.4943	34.9954	35.381
2223.92	33.9271	32.873	35.3577	33.9103	33.6603	28.3524	30.2739	33.0374	30.7354	33.4714	31.0298	21.322	32.3442	32.4081	29.1903	28.9799	32.9889	32.9871	33.7081	33.1405	29.5464	30.3589	32.0948	32.0327	32.7709	32.5401	33.8244	33.3433	33.6037	32.327	32.8633	33.4221	33.1367	33.7014	32.944	34.177	34.6316	34.6369	34.9928	34.207	34.3446	35.1706	34.8747	35.0626	33.0723	33.63	35.7282	35.2267	35.6115
2225.85	34.1631	33.108	35.5957	34.1447	33.8953	28.5792	30.5071	33.2768	30.9645	33.7088	31.267	21.5341	32.5808	32.6468	29.4257	29.2065	33.2212	33.2234	33.9494	33.3819	29.7776	30.5907	32.3248	32.2631	33.0093	32.7782	34.062	33.5815	33.8369	32.5566	33.0981	33.6576	33.377	33.9453	33.1848	34.4143	34.8735	34.875	35.2315	34.4471	34.5831	35.4085	35.1169	35.3008	33.3096	33.8633	35.97	35.461	35.8458
2227.78	34.3966	33.3427	35.827	34.3836	34.1298	28.8009	30.7355	33.5107	31.1891	33.945	31.4995	21.7442	32.8132	32.8811	29.6587	29.4288	33.4503	33.4569	34.1828	33.6149	30.0056	30.8211	32.5548	32.4958	33.2454	33.0127	34.2975	33.8166	34.0697	32.7807	33.3323	33.8978	33.6111	34.1777	33.4183	34.6476	35.1111	35.1089	35.4679	34.6813	34.8162	35.6466	35.3528	35.5341	33.546	34.0933	36.2068	35.697	36.0764
2229.71	34.6365	33.5796	36.0678	34.6266	34.3694	29.0312	30.9706	33.7497	31.4197	34.1858	31.7378	21.9611	33.0532	33.1199	29.8902	29.6581	33.6908	33.6949	34.4246	33.8505	30.2415	31.0602	32.7965	32.7379	33.4853	33.2541	34.5432	34.0583	34.3163	33.0139	33.5715	34.1415	33.8509	34.42	33.6529	34.8891	35.3456	35.349	35.7112	34.9203	35.0613	35.8902	35.5954	35.7759	33.7899	34.3305	36.452	35.9409	36.3196
2231.64	34.8701	33.8132	36.3056	34.8546	34.603	29.2608	31.2035	33.9844	31.6456	34.4211	31.9715	22.1765	33.2886	33.357	30.1157	29.8817	33.9296	33.9295	34.6638	34.087	30.4738	31.2965	33.0339	32.968	33.7262	33.4901	34.7849	34.2922	34.5578	33.2419	33.8025	34.3786	34.0902	34.6643	33.8876	35.1252	35.5835	35.5818	35.9553	35.1557	35.2986	36.1273	35.8337	36.0106	34.0269	34.5615	36.6901	36.1746	36.5605
2233.57	35.111	34.0533	36.5503	35.0951	34.8441	29.494	31.4435	34.2269	31.874	34.6635	32.213	22.3949	33.5299	33.5988	30.3514	30.11	34.1709	34.1711	34.9094	34.3349	30.7106	31.5411	33.2725	33.2038	33.9733	33.7329	35.033	34.5355	34.8034	33.4777	34.0408	34.6235	34.3338	34.9095	34.1299	35.3686	35.8315	35.8244	36.201	35.3921	35.5393	36.3675	36.0789	36.2505	34.2678	34.7971	36.9313	36.4172	36.8018
2235.5	35.3487	34.2924	36.7876	35.3368	35.0808	29.7231	31.6791	34.4673	32.1003	34.9004	32.4501	22.6109	33.7678	33.8359	30.5833	30.3368	34.4061	34.4087	35.1521	34.5786	30.9453	31.7788	33.5108	33.4454	34.206	33.972	35.2711	34.776	35.0429	33.7074	34.2821	34.8668	34.5753	35.1472	34.3678	35.6104	36.0738	36.0656	36.4386	35.6243	35.7792	36.6051	36.3165	36.4889	34.5035	35.0279	37.1707	36.655	37.0415
2237.43	35.594	34.5443	37.0309	35.5796	35.3222	29.9579	31.9202	34.7127	32.3338	35.1456	32.6925	22.8345	34.0133	34.0809	30.8222	30.5698	34.652	34.6553	35.3991	34.8273	31.1881	32.0213	33.7574	33.6891	34.4511	34.2185	35.5134	35.0221	35.2863	33.9439	34.5279	35.1191	34.8252	35.3964	34.6097	35.8571	36.3194	36.3123	36.6862	35.8679	36.0288	36.8542	36.5618	36.7373	34.7482	35.2658	37.42	36.9019	37.2896
2239.36	35.8351	34.7903	37.273	35.8155	35.5604	30.1908	32.1606	34.9543	32.5614	35.3861	32.9345	23.0596	34.255	34.3228	31.0632	30.7982	34.896	34.8986	35.6413	35.071	31.4244	32.2647	33.9987	33.927	34.6947	34.4627	35.7537	35.2654	35.5248	34.1798	34.77	35.3639	35.0707	35.6463	34.8512	36.099	36.5598	36.5576	36.9307	36.1055	36.2703	37.0985	36.8114	36.9782	34.9925	35.5046	37.6652	37.1481	37.5341
2241.28	36.0839	35.0301	37.5258	36.0703	35.8086	30.4313	32.4083	35.2032	32.7979	35.6331	33.1847	23.2895	34.5038	34.5754	31.3092	31.0353	35.1466	35.1481	35.8948	35.3232	31.6652	32.5176	34.2494	34.1817	34.9421	34.7117	36.003	35.5153	35.7761	34.4212	35.0185	35.611	35.3214	35.8979	35.1029	36.3462	36.812	36.806	37.1874	36.3529	36.5201	37.3499	37.0658	37.2299	35.2421	35.7485	37.9182	37.3964	37.7854
2243.21	36.3282	35.2633	37.7746	36.3092	36.0502	30.6668	32.648	35.4476	33.0353	35.879	33.4302	23.5183	34.7486	34.8235	31.5505	31.2722	35.3883	35.3953	36.1464	35.5744	31.9078	32.7678	34.4988	34.4305	35.1883	34.957	36.2542	35.759	36.0184	34.6576	35.2621	35.8607	35.5643	36.1451	35.3474	36.5909	37.0617	37.0511	37.4384	36.5964	36.7667	37.5961	37.3115	37.4788	35.486	35.9872	38.1672	37.6373	38.0315
2245.14	36.5768	35.5078	38.0242	36.5512	36.2965	30.9079	32.8938	35.6991	33.2791	36.1304	33.6817	23.7519	34.9987	35.073	31.7943	31.5158	35.6369	35.6465	36.403	35.8324	32.1594	33.0213	34.7518	34.6774	35.4384	35.2105	36.5104	36.0087	36.261	34.8981	35.5138	36.1174	35.818	36.4012	35.5945	36.8441	37.3119	37.3016	37.6933	36.8435	37.0148	37.848	37.5665	37.728	35.7354	36.2345	38.4217	37.893	38.2829
2247.07	36.8211	35.7587	38.2686	36.8045	36.5423	31.1479	33.1371	35.9431	33.5129	36.3764	33.9282	23.9795	35.2453	35.3211	32.0369	31.7539	35.8828	35.8899	36.6546	36.0845	32.402	33.2714	35	34.9203	35.6862	35.462	36.7605	36.2546	36.5105	35.1352	35.7621	36.3685	36.071	36.6551	35.8439	37.0937	37.559	37.5485	37.9406	37.0826	37.2635	38.0956	37.8194	37.9759	35.9815	36.4771	38.6666	38.1433	38.5292
2249	37.0734	36.0158	38.5206	37.0586	36.7895	31.3935	33.3845	36.1912	33.7485	36.6283	34.177	24.2143	35.4987	35.5745	32.2857	31.9974	36.1299	36.1373	36.9105	36.3377	32.6449	33.5281	35.2533	35.1694	35.9442	35.7195	37.0175	36.5063	36.7719	35.3804	36.0156	36.625	36.3241	36.9059	36.101	37.3471	37.8093	37.8021	38.195	37.329	37.5185	38.3498	38.0747	38.231	36.234	36.7212	38.9169	38.3972	38.7834
2250.93	37.3195	36.2632	38.7668	37.2944	37.0279	31.6341	33.6282	36.4386	33.9793	36.8725	34.4236	24.4485	35.7479	35.8225	32.524	32.2349	36.3683	36.3848	37.1642	36.5883	32.8886	33.78	35.5076	35.4156	36.1917	35.9687	37.2685	36.7522	37.013	35.6234	36.2621	36.8759	36.5722	37.1525	36.3507	37.5947	38.0519	38.0533	38.4484	37.5751	37.7657	38.6019	38.326	38.4758	36.4802	36.9595	39.1657	38.6441	39.033
2252.86	37.5693	36.5083	39.02	37.5472	37.2765	31.8828	33.8793	36.6908	34.2144	37.1194	34.6757	24.686	36.0025	36.0769	32.7678	32.4746	36.6147	36.6424	37.4247	36.8508	33.1375	34.0424	35.7658	35.6676	36.4502	36.2226	37.5202	37.0053	37.2566	35.8713	36.5146	37.1355	36.8275	37.4152	36.6034	37.8479	38.3046	38.3117	38.707	37.8245	38.0212	38.859	38.5849	38.7242	36.732	37.2064	39.4201	38.8944	39.2866
2254.79	37.8177	36.745	39.2688	37.7961	37.5243	32.1283	34.1271	36.9382	34.4467	37.3644	34.9243	24.9218	36.2528	36.3267	33.0116	32.7113	36.8617	36.8895	37.6808	37.1094	33.3762	34.2981	36.0184	35.9206	36.7048	36.4767	37.7636	37.2537	37.5136	36.1166	36.7703	37.3944	37.0819	37.6721	36.8531	38.0989	38.5587	38.5653	38.9608	38.0686	38.2739	39.1094	38.8396	38.9739	36.9806	37.4511	39.6681	39.1456	39.5394
2256.71	38.0755	36.9943	39.5246	38.0381	37.7765	32.3806	34.3813	37.1916	34.6919	37.6187	35.1797	25.1633	36.5099	36.5832	33.2629	32.9599	37.1149	37.1411	37.9462	37.3719	33.6235	34.5588	36.282	36.18	36.9664	36.7374	38.0188	37.5057	37.7656	36.3677	37.0285	37.6548	37.3395	37.9286	37.1104	38.358	38.8171	38.8241	39.2188	38.3229	38.5328	39.3677	39.101	39.231	37.2322	37.6992	39.9281	39.4066	39.7969
2258.64	38.3251	37.2405	39.7758	38.2886	38.0227	32.628	34.6297	37.4417	34.9334	37.8705	35.4287	25.4051	36.7646	36.8373	33.5128	33.2042	37.3618	37.3916	38.2068	37.6277	33.8723	34.8191	36.5423	36.4307	37.2255	36.9946	38.2775	37.7576	38.0063	36.6098	37.2819	37.9115	37.5944	38.1874	37.3644	38.6133	39.0672	39.0764	39.4737	38.568	38.7876	39.6232	39.3575	39.4786	37.4807	37.9465	40.1829	39.6586	40.0513
2260.57	38.5757	37.4932	40.0323	38.5468	38.2702	32.8807	34.8825	37.6966	35.1775	38.1258	35.6844	25.6538	37.023	37.0987	33.765	33.452	37.6105	37.6471	38.4669	37.8925	34.1234	35.0871	36.8104	36.6881	37.4807	37.2575	38.5446	38.017	38.2686	36.8573	37.5456	38.1758	37.8611	38.4554	37.6225	38.8714	39.3252	39.3362	39.7351	38.8193	39.0439	39.8852	39.6197	39.7394	37.7392	38.198	40.4396	39.9176	40.3098
2262.5	38.8277	37.7455	40.2848	38.7856	38.5115	33.1293	35.1331	37.946	35.4158	38.3749	35.9359	25.8974	37.2759	37.3569	34.012	33.6979	37.8585	37.898	38.7255	38.1534	34.3694	35.3487	37.0707	36.9377	37.7314	37.5133	38.8002	38.2666	38.5247	37.1025	37.8007	38.4355	38.1196	38.713	37.8802	39.1237	39.5789	39.5921	39.9914	39.075	39.294	40.1398	39.8783	39.995	37.9919	38.4426	40.6887	40.1694	40.563
2264.43	39.0863	38.0047	40.5424	39.037	38.764	33.3831	35.3882	38.2023	35.6581	38.6286	36.1908	26.1433	37.5348	37.6165	34.2672	33.9457	38.1121	38.1529	38.9903	38.416	34.6235	35.6099	37.3319	37.191	37.9888	37.7723	39.0567	38.5193	38.7759	37.3499	38.0589	38.7015	38.3763	38.9724	38.1382	39.3812	39.8389	39.8517	40.247	39.33	39.5587	40.4017	40.1413	40.2503	38.2469	38.6913	40.945	40.4242	40.8237
2266.36	39.3358	38.2594	40.7914	39.2878	39.0126	33.6331	35.6373	38.4525	35.8953	38.8753	36.4397	26.3846	37.7885	37.8705	34.5184	34.1858	38.3659	38.4037	39.2476	38.6719	34.8709	35.8685	37.5876	37.4441	38.2447	38.0251	39.3125	38.7672	39.0281	37.5925	38.3146	38.96	38.6274	39.2298	38.386	39.6333	40.0949	40.1018	40.4949	39.5741	39.8102	40.6518	40.3952	40.4979	38.4973	38.9323	41.1992	40.674	41.075
2268.29	39.59	38.5052	41.0433	39.5349	39.2621	33.8864	35.8926	38.7091	36.1398	39.1301	36.697	26.6306	38.0462	38.128	34.77	34.4309	38.622	38.659	39.5097	38.9327	35.1224	36.1355	37.8459	37.7049	38.505	38.2816	39.5695	39.024	39.2906	37.8406	38.5748	39.2207	38.8859	39.4948	38.6463	39.8893	40.3506	40.3577	40.7549	39.8323	40.0652	40.9062	40.655	40.7556	38.7542	39.1803	41.456	40.9227	41.3307
2270.22	39.8419	38.7416	41.296	39.7851	39.5091	34.1371	36.143	38.9607	36.3805	39.3832	36.9511	26.8739	38.296	38.3786	35.0165	34.6711	38.8703	38.9091	39.7652	39.1881	35.371	36.3946	38.0969	37.9596	38.7554	38.535	39.8221	39.2801	39.5397	38.0864	38.8263	39.473	39.1423	39.7506	38.9028	40.1412	40.5996	40.6109	41.0076	40.0791	40.3223	41.1625	40.907	41.0067	39.0029	39.4241	41.7081	41.1682	41.5804
2272.15	40.1002	38.9975	41.5527	40.0503	39.7687	34.3936	36.399	39.2199	36.6264	39.6396	37.2082	27.1209	38.5525	38.6379	35.2712	34.9173	39.1281	39.1682	40.0248	39.4478	35.6312	36.6496	38.3574	38.2189	39.0162	38.7967	40.081	39.5399	39.7929	38.3381	39.0831	39.7326	39.4036	40.0085	39.1556	40.4002	40.8553	40.8702	41.2691	40.3247	40.5786	41.422	41.1632	41.2636	39.2594	39.6777	41.9645	41.4248	41.8375
2274.07	40.3517	39.2634	41.8039	40.3025	40.0241	34.6455	36.6531	39.4746	36.8736	39.8921	37.4614	27.3647	38.8085	38.8913	35.5265	35.1583	39.3818	39.4243	40.2777	39.7026	35.8929	36.8995	38.6128	38.4716	39.2706	39.0527	40.335	39.7963	40.0536	38.583	39.336	39.9862	39.6596	40.2685	39.4027	40.6518	41.1088	41.1223	41.524	40.5752	40.8289	41.6759	41.4156	41.5161	39.5188	39.9263	42.2167	41.6791	42.0892
2276	40.6101	39.5387	42.0618	40.564	40.2776	34.9026	36.9121	39.7333	37.1322	40.1529	37.7221	27.613	39.0686	39.1469	35.7883	35.4058	39.6436	39.6871	40.5375	39.9606	36.1575	37.1552	38.8617	38.7289	39.5252	39.3106	40.5982	40.0611	40.3117	38.8332	39.5931	40.2423	39.9211	40.5327	39.6555	40.9119	41.3705	41.3768	41.778	40.834	41.0926	41.9336	41.6721	41.7719	39.7788	40.1782	42.4757	41.9411	42.3467
2277.93	40.867	39.7999	42.3146	40.8338	40.5327	35.1551	37.1653	39.9903	37.3868	40.4114	37.9768	27.8567	39.3197	39.398	36.0426	35.6532	39.9042	39.9451	40.789	40.2105	36.417	37.4045	39.1025	38.9792	39.7827	39.5604	40.8557	40.3204	40.5631	39.0768	39.8466	40.4922	40.1751	40.7863	39.9041	41.1649	41.6236	41.6214	42.0263	41.0845	41.3505	42.1865	41.92	42.0274	40.0333	40.4299	42.7298	42.1911	42.5957
2279.86	41.1271	40.0632	42.5713	41.0988	40.798	35.4115	37.4231	40.2559	37.6477	40.6774	38.2382	28.1035	39.5746	39.6561	36.3	35.904	40.172	40.2111	41.0436	40.4613	36.6875	37.6512	39.3506	39.2366	40.0418	39.8149	41.118	40.5849	40.8297	39.3261	40.105	40.7473	40.4349	41.0423	40.1574	41.4224	41.8766	41.8713	42.2866	41.3458	41.6122	42.4433	42.1747	42.2923	40.3003	40.689	42.992	42.443	42.8519
2281.79	41.3847	40.3217	42.8296	41.3548	41.0585	35.667	37.6807	40.5179	37.9086	40.9392	38.4988	28.3527	39.8301	39.9134	36.5582	36.1565	40.441	40.4763	41.3038	40.7184	36.9563	37.9021	39.6075	39.5049	40.3015	40.0731	41.3747	40.8488	41.0901	39.5809	40.3649	41.0074	40.6953	41.3054	40.409	41.6812	42.1318	42.1284	42.547	41.6097	41.8681	42.7019	42.4296	42.5485	40.5624	40.9457	43.2554	42.6986	43.1068
2283.72	41.6436	40.5729	43.0941	41.6138	41.3122	35.9295	37.9422	40.7797	38.1604	41.1948	38.7589	28.613	40.1019	40.184	36.8235	36.4229	40.7002	40.7365	41.5822	40.9981	37.2149	38.1844	39.8945	39.7789	40.571	40.3486	41.6377	41.1123	41.3472	39.8501	40.6369	41.2858	40.9646	41.5798	40.681	41.9479	42.4001	42.3989	42.8171	41.8698	42.1361	42.9755	42.701	42.8069	40.8218	41.2029	43.5217	42.9656	43.3727
2285.65	41.8917	40.8072	43.3426	41.8468	41.5389	36.1884	38.1974	41.0274	38.3775	41.4353	39.0041	28.8766	40.3737	40.4565	37.0716	36.68	40.9344	40.9838	41.8632	41.2847	37.4436	38.4814	40.1934	40.0467	40.838	40.628	41.9019	41.3584	41.6037	40.1092	40.9034	41.5665	41.2311	41.843	40.9525	42.2084	42.6606	42.6722	43.0844	42.1172	42.4018	43.2451	42.9779	43.0609	41.0658	41.4392	43.7758	43.2212	43.6377
2287.58	42.1464	41.0412	43.5914	42.0746	41.7677	36.4541	38.4564	41.2787	38.5868	41.6748	39.25	29.1477	40.6511	40.7346	37.3141	36.9357	41.1626	41.2325	42.1556	41.5813	37.6629	38.7883	40.5007	40.3216	41.1147	40.9132	42.1752	41.6012	41.8614	40.3749	41.1728	41.8507	41.4972	42.115	41.222	42.477	42.9287	42.9538	43.3536	42.3743	42.666	43.5137	43.2629	43.3163	41.3102	41.678	44.0318	43.4852	43.9095
2289.5	42.3994	41.2708	43.8396	42.2959	41.9968	36.7161	38.7085	41.5236	38.7923	41.9064	39.4912	29.4189	40.9249	41.0081	37.5532	37.1929	41.3885	41.4743	42.4492	41.8741	37.8821	39.0973	40.8055	40.5864	41.3875	41.1954	42.4435	41.8362	42.1003	40.639	41.4429	42.1352	41.7628	42.3911	41.49	42.7422	43.1974	43.2331	43.6194	42.6244	42.9262	43.7805	43.5444	43.5639	41.5516	41.9179	44.2812	43.7481	44.1813
2291.43	42.6583	41.4992	44.0929	42.5216	42.2236	36.9825	38.9688	41.7726	39.0011	42.141	39.7368	29.6965	41.2059	41.2904	37.8	37.4596	41.6137	41.7202	42.7519	42.1774	38.1027	39.4163	41.1224	40.856	41.6702	41.4838	42.7115	42.0786	42.3505	40.9088	41.7186	42.4238	42.0331	42.6663	41.7752	43.0114	43.4665	43.521	43.8918	42.8797	43.1938	44.0595	43.836	43.8205	41.7961	42.16	44.5369	44.0174	44.4523
2293.36	42.9069	41.7194	44.3387	42.7383	42.4407	37.2449	39.2235	42.0176	39.203	42.3675	39.9753	29.9725	41.4859	41.5705	38.0338	37.7182	41.8275	41.9555	43.0508	42.4782	38.3147	39.7277	41.4412	41.1259	41.9513	41.7695	42.9727	42.3147	42.5995	41.1772	41.9903	42.7123	42.2957	42.927	42.0549	43.273	43.7286	43.8009	44.1561	43.1356	43.4564	44.3392	44.1264	44.0714	42.0365	42.3997	44.7861	44.2834	44.7237
2295.29	43.1578	41.939	44.5927	42.9621	42.6677	37.5121	39.4806	42.2681	39.4084	42.5993	40.2183	30.2543	41.772	41.8539	38.2725	37.9842	42.0472	42.1943	43.3541	42.7852	38.5341	40.0509	41.7584	41.396	42.2352	42.0627	43.2415	42.5556	42.8418	41.448	42.2711	43.0122	42.5645	43.1966	42.3371	43.5416	43.9973	44.0856	44.4353	43.3925	43.7247	44.6212	44.4185	44.3236	42.2812	42.6461	45.0439	44.5521	45.0064
2297.22	43.4028	42.1387	44.8389	43.1717	42.8886	37.7767	39.7338	42.5117	39.605	42.824	40.4526	30.534	42.0506	42.1346	38.513	38.2507	42.2602	42.4305	43.6567	43.0866	38.7459	40.379	42.0669	41.6575	42.5109	42.3504	43.5009	42.7872	43.0741	41.7106	42.547	43.3073	42.8286	43.4702	42.6123	43.8088	44.2592	44.3668	44.7197	43.6363	43.9898	44.8945	44.7065	44.5708	42.5189	42.8864	45.293	44.8135	45.2742
2299.15	43.6514	42.3446	45.083	43.3786	43.1041	38.045	39.9872	42.7566	39.7993	43.049	40.692	30.8196	42.3336	42.4192	38.759	38.5181	42.4782	42.6707	43.9637	43.3911	38.9543	40.7072	42.3866	41.9271	42.7838	42.6387	43.7602	43.0182	43.3158	41.9775	42.8219	43.6069	43.1041	43.7489	42.8944	44.078	44.5296	44.6561	44.9986	43.8883	44.2601	45.179	45.0026	44.8255	42.7549	43.1208	45.5448	45.0805	45.5452
2301.08	43.8996	42.5602	45.3262	43.5876	43.3124	38.3047	40.2355	42.9963	39.9858	43.2685	40.9278	31.1033	42.6115	42.6986	38.9926	38.7753	42.6883	42.9037	44.2648	43.6905	39.1495	41.027	42.7079	42.1931	43.0623	42.9257	44.0195	43.2454	43.5591	42.2465	43.0953	43.9029	43.3701	44.0176	43.1782	44.3421	44.7932	44.9413	45.2676	44.1329	44.5221	45.4538	45.2938	45.0671	42.9862	43.3451	45.7977	45.3462	45.8158
2303.01	44.1564	42.7847	45.5804	43.7926	43.5286	38.5745	40.4978	43.2416	40.1807	43.4952	41.1712	31.3962	42.9033	42.9924	39.2342	39.052	42.9036	43.1418	44.5824	44.0137	39.3482	41.3679	43.0545	42.4711	43.3582	43.2337	44.2988	43.4794	43.8099	42.5346	43.3885	44.22	43.6426	44.3014	43.4744	44.6232	45.0596	45.2428	45.5531	44.3897	44.7941	45.7371	45.6031	45.3226	43.228	43.5863	46.0542	45.6233	46.1051
2304.94	44.3947	42.969	45.8208	43.963	43.7185	38.8425	40.7514	43.4744	40.3358	43.6964	41.3947	31.6981	43.2024	43.2937	39.4594	39.3344	43.0828	43.3606	44.9175	44.3623	39.5147	41.74	43.4247	42.7598	43.6489	43.5556	44.5818	43.6914	44.0431	42.8252	43.6845	44.5514	43.9151	44.5872	43.7779	44.9019	45.3333	45.558	45.8332	44.6456	45.0634	46.0315	45.9275	45.5677	43.446	43.8127	46.2948	45.8944	46.396
2306.86	44.6333	43.1186	46.0595	44.1169	43.8912	39.1209	41.0038	43.6983	40.4614	43.8804	41.6056	32.0145	43.5163	43.6094	39.672	39.6116	43.2354	43.5693	45.2785	44.7318	39.6493	42.1471	43.8244	43.0476	43.9561	43.8885	44.8569	43.8877	44.2677	43.1183	43.9863	44.9016	44.192	44.8794	44.1002	45.1882	45.614	45.89	46.1245	44.8906	45.3406	46.3425	46.2638	45.8046	43.6555	44.0299	46.5395	46.1711	46.6952
2308.79	44.8593	43.2538	46.2856	44.2605	44.055	39.3909	41.2501	43.9152	40.5761	44.0522	41.807	32.3233	43.8171	43.9123	39.8708	39.8795	43.3773	43.7644	45.6224	45.0806	39.7699	42.5405	44.2101	43.3032	44.2483	44.2059	45.1096	44.0705	44.4878	43.398	44.2736	45.2394	44.4592	45.1557	44.4082	45.4661	45.8802	46.2074	46.4124	45.1165	45.6064	46.6364	46.5927	46.0331	43.8543	44.2386	46.7768	46.4419	46.9768
2310.72	45.0905	43.4136	46.5115	44.4211	44.2231	39.6553	41.4938	44.1388	40.7033	44.2361	42.0217	32.6257	44.1012	44.199	40.0717	40.1295	43.5358	43.9678	45.9447	45.4048	39.9237	42.9159	44.5681	43.5606	44.5268	44.5071	45.361	44.2654	44.715	43.6616	44.557	45.5694	44.7213	45.429	44.6976	45.7322	46.1429	46.5162	46.6931	45.3453	45.8706	46.9163	46.9103	46.2605	44.0579	44.4473	47.0107	46.7067	47.2488
2312.65	45.3271	43.6046	46.7481	44.6088	44.4075	39.9142	41.7338	44.3651	40.8593	44.4384	42.2444	32.9197	44.378	44.4769	40.2887	40.3703	43.7264	44.1863	46.2491	45.7101	40.1105	43.2603	44.9059	43.8283	44.8071	44.7984	45.6163	44.482	44.9477	43.9189	44.8387	45.8826	44.9858	45.7075	44.9773	45.9937	46.3994	46.8113	46.9684	45.5841	46.1289	47.1903	47.2027	46.4883	44.2768	44.6641	47.2481	46.9589	47.5196
2314.58	45.5861	43.8206	47.011	44.8132	44.6325	40.1928	42.0067	44.6166	41.0637	44.6714	42.4924	33.2295	44.69	44.7861	40.5421	40.6764	43.9403	44.4333	46.5969	46.0636	40.3034	43.6409	45.2973	44.1363	45.1298	45.1263	45.8962	44.7261	45.2007	44.2225	45.1439	46.2289	45.2795	46.0179	45.3008	46.296	46.6847	47.1332	47.2755	45.8608	46.4115	47.5053	47.5243	46.7485	44.5252	44.9218	47.5173	47.2534	47.8239
2316.51	45.8214	43.9784	47.2486	44.9558	44.8178	40.4671	42.2706	44.8443	41.2105	44.8585	42.7104	33.5619	45.0104	45.1109	40.7686	41.0056	44.0995	44.6482	46.9764	46.4573	40.4196	44.0787	45.7371	44.4345	45.4484	45.4758	46.1728	44.9275	45.4281	44.5435	45.4606	46.6066	45.5638	46.3201	45.6529	46.601	46.9721	47.4814	47.5781	46.1234	46.6919	47.8225	47.8794	46.9989	44.7363	45.1591	47.7627	47.5534	48.1298
2318.44	46.0301	44.0633	47.4589	45.0365	44.9225	40.742	42.5056	45.0403	41.2469	44.9795	42.8833	33.9115	45.3278	45.4435	40.9429	41.292	44.178	44.8121	47.3715	46.8685	40.4686	44.5755	46.196	44.7165	45.7678	45.8335	46.4449	45.0692	45.6182	44.8385	45.7831	47.0095	45.8438	46.6277	45.9999	46.8941	47.2462	47.8463	47.8678	46.355	46.9656	48.1359	48.2566	47.2173	44.8947	45.338	47.9818	47.833	48.4297
2320.37	46.219	44.1065	47.6444	45.0751	44.9856	41.002	42.7069	45.203	41.2125	45.0626	43.0293	34.2449	45.6201	45.75	41.073	41.5107	44.209	44.9343	47.7431	47.2548	40.4976	45.0557	46.6319	44.95	46.0721	46.1615	46.6869	45.1731	45.7724	45.0824	46.0701	47.3905	46.0955	46.9094	46.3057	47.1541	47.4905	48.1883	48.1431	46.5406	47.2166	48.4388	48.6049	47.3973	45.02	45.4667	48.1763	48.0778	48.7148
2322.29	46.4266	44.1972	47.8457	45.1693	45.0988	41.2642	42.9221	45.3887	41.2255	45.1905	43.2022	34.5697	45.9059	46.0464	41.2258	41.7225	44.3034	45.0927	48.0983	47.6123	40.5767	45.4942	47.0788	45.1877	46.3425	46.477	46.9304	45.3157	45.9598	45.3206	46.3633	47.7588	46.3505	47.1884	46.6027	47.4176	47.7401	48.5052	48.4159	46.7261	47.4571	48.72	48.9272	47.5929	45.1838	45.6156	48.3913	48.3226	48.9907
2324.22	46.6539	44.3577	48.0742	45.3421	45.2654	41.5303	43.1663	45.606	41.3495	45.3702	43.4077	34.8877	46.2006	46.3439	41.4211	41.983	44.4526	45.2961	48.4551	47.9738	40.7139	45.9141	47.5167	45.4562	46.6394	46.789	47.1913	45.5118	46.1863	45.5966	46.6702	48.1213	46.6211	47.4706	46.895	47.6998	48.0064	48.8151	48.6873	46.965	47.7133	49.0028	49.2463	47.8119	45.391	45.8268	48.6181	48.5865	49.2689
2326.15	46.8983	44.5209	48.3248	45.5246	45.4569	41.806	43.4292	45.8404	41.5226	45.5703	43.6404	35.2261	46.521	46.6639	41.6549	42.3029	44.6251	45.523	48.842	48.3767	40.8696	46.3579	47.9706	45.751	46.9765	47.1341	47.469	45.7235	46.4185	45.9219	46.9897	48.511	46.9095	47.7728	47.219	48.0044	48.3107	49.1689	48.9914	47.2359	48.0001	49.3241	49.5941	48.0504	45.6016	46.0679	48.8639	48.8812	49.5773
2328.08	47.1005	44.6292	48.5309	45.6283	45.5816	42.0593	43.6476	46.0341	41.5958	45.7066	43.8209	35.5451	46.804	46.9564	41.8291	42.5484	44.7414	45.6966	49.1819	48.7384	40.9668	46.7588	48.3646	45.9868	47.2286	47.4402	47.6993	45.869	46.597	46.1815	47.2656	48.861	47.1618	48.0532	47.527	48.2648	48.5672	49.4926	49.2527	47.4315	48.2428	49.608	49.9075	48.2504	45.7676	46.24	49.0759	49.1417	49.8359
2330.01	47.2976	44.7829	48.7265	45.7431	45.7019	42.3155	43.8551	46.2265	41.642	45.8439	44.0036	35.8396	47.0631	47.2294	41.9882	42.7232	44.8713	45.8633	49.4684	49.0457	41.0792	47.1164	48.6886	46.2107	47.4694	47.7088	47.9271	46.0273	46.79	46.3699	47.5246	49.1709	47.3986	48.3252	47.8111	48.5047	48.7895	49.7779	49.4791	47.6253	48.464	49.8541	50.2005	48.4401	45.9501	46.394	49.2762	49.3727	50.0735
2331.94	47.5276	45.0129	48.9472	45.9354	45.8996	42.5669	44.0877	46.4455	41.7863	46.0509	44.2267	36.1137	47.3134	47.4832	42.203	42.9249	45.0666	46.0746	49.7236	49.3088	41.2763	47.4254	48.9966	46.4659	47.7278	47.9713	48.1775	46.2514	47.0051	46.574	47.7838	49.4498	47.6476	48.5938	48.0573	48.7468	49.0155	50.0412	49.7201	47.8575	48.7049	50.0941	50.4713	48.654	46.1695	46.6	49.4921	49.5943	50.3131
2333.87	47.7842	45.2435	49.2063	46.1634	46.1527	42.8303	44.362	46.7036	42.028	46.306	44.4876	36.4034	47.5937	47.7618	42.468	43.2277	45.2979	46.3264	50.0122	49.6135	41.5086	47.7592	49.3527	46.7621	48.0344	48.2678	48.4522	46.5085	47.2639	46.8605	48.0734	49.7714	47.9243	48.8731	48.3354	49.0329	49.2874	50.3358	49.9951	48.1312	48.9673	50.3754	50.7541	48.9115	46.4303	46.8721	49.754	49.8586	50.5843
2335.8	48.0023	45.3947	49.4239	46.3412	46.3223	43.0866	44.6075	46.9176	42.1764	46.4935	44.7047	36.6882	47.8568	48.0179	42.6773	43.479	45.4659	46.5298	50.3042	49.9248	41.6653	48.1014	49.6725	47.0096	48.3258	48.5575	48.6957	46.7016	47.4989	47.1186	48.3423	50.0844	48.1613	49.1269	48.6091	49.2964	49.5375	50.61	50.2372	48.3554	49.207	50.643	51.0316	49.1291	46.6381	47.0809	49.9858	50.1097	50.8345
2337.72	48.2273	45.5625	49.6418	46.514	46.4867	43.3476	44.8447	47.1372	42.315	46.6882	44.9249	36.9757	48.1352	48.2959	42.889	43.7252	45.6279	46.7381	50.6137	50.2502	41.8138	48.4411	49.9993	47.2667	48.6167	48.8492	48.9498	46.9008	47.722	47.3801	48.6035	50.3886	48.411	49.3894	48.8908	49.5603	49.7741	50.8866	50.5046	48.5686	49.4633	50.9017	51.3254	49.3435	46.8397	47.2838	50.2084	50.3622	51.0877
2339.65	48.4205	45.718	49.8334	46.6527	46.6608	43.5823	45.0505	47.3292	42.4201	46.8584	45.1142	37.2496	48.3783	48.546	43.0718	43.9469	45.7685	46.9111	50.9005	50.5356	41.949	48.7612	50.3068	47.4584	48.8375	49.1071	49.1604	47.0711	47.8998	47.6032	48.8314	50.6523	48.6548	49.6249	49.1317	49.7821	49.9773	51.1395	50.7411	48.7494	49.678	51.1388	51.6051	49.5373	47.0264	47.4608	50.3986	50.5666	51.3137
2341.58	48.6168	45.8817	50.0181	46.8152	46.8305	43.8018	45.2321	47.5057	42.5274	47.0191	45.2968	37.4893	48.5625	48.7352	43.2352	44.0925	45.9289	47.0751	51.1111	50.7371	42.1097	48.9959	50.4952	47.599	49.0309	49.3129	49.322	47.2285	48.0713	47.7579	49.0287	50.8513	48.8646	49.8314	49.3174	49.9522	50.1697	51.3347	50.924	48.9213	49.8609	51.3389	51.8148	49.7413	47.2239	47.6131	50.5857	50.7424	51.5064
2343.51	48.7851	46.1132	50.1703	47.0156	46.9843	43.9784	45.3494	47.6638	42.6593	47.2029	45.4831	37.6035	48.5941	48.7699	43.3757	44.0288	46.144	47.2319	51.0908	50.6793	42.3691	48.8926	50.3337	47.6294	49.0651	49.3327	49.4018	47.3723	48.2165	47.7246	49.0829	50.8211	48.9642	49.9218	49.3083	49.9893	50.261	51.3348	51.0084	48.9921	49.9648	51.3835	51.8465	49.8634	47.422	47.7042	50.7308	50.8037	51.5743
2345.44	49.0948	46.6276	50.4674	47.4937	47.3942	44.2263	45.5982	47.9964	43.1068	47.6455	45.8776	37.6988	48.6844	48.8426	43.7226	44.0258	46.6852	47.626	51.0633	50.5893	42.945	48.6804	50.0701	47.7988	49.1393	49.3769	49.6302	47.7883	48.5191	47.7478	49.1961	50.7526	49.148	50.0609	49.3064	50.1317	50.4412	51.343	51.1782	49.1834	50.1587	51.4824	51.8771	50.1047	47.8174	47.9621	51.0214	50.9297	51.707
2347.37	49.5838	47.3502	50.9653	48.2355	48.1222	44.545	46.1055	48.5366	44.1006	48.3363	46.4515	37.9464	49.0699	49.2023	44.3915	44.6828	47.4395	48.2467	51.33	50.8486	43.7105	48.7957	50.2687	48.3357	49.5282	49.7211	50.1239	48.4735	49.0716	48.3034	49.5812	50.9809	49.5557	50.4064	49.7066	50.5901	50.8799	51.6643	51.561	49.7789	50.5822	51.8489	52.1517	50.6529	48.4065	48.6335	51.5269	51.4079	52.089
2349.3	49.9623	47.7061	51.3605	48.6217	48.5684	44.8585	46.5551	48.9291	44.7273	48.7401	46.8268	38.3412	49.5592	49.6899	44.8672	45.4943	47.8111	48.6379	51.8296	51.3888	44.0563	49.337	50.9066	48.8558	50.0368	50.2281	50.5823	48.8937	49.5165	49.0017	50.0595	51.5047	49.9807	50.8337	50.3047	51.0866	51.3403	52.1828	51.9821	50.3322	51.0195	52.3303	52.6355	51.1159	48.7858	49.2001	51.9403	51.9405	52.5432
2351.23	50.1225	47.5498	51.5364	48.4716	48.5181	45.147	46.7829	49.0389	44.5267	48.6988	46.9049	38.8217	49.9751	50.127	44.9352	45.8931	47.6619	48.6758	52.4154	52.0295	43.8376	50.1662	51.7024	49.1367	50.4624	50.7265	50.8478	48.899	49.6669	49.4059	50.4723	52.1577	50.2781	51.197	50.8045	51.4332	51.6448	52.6972	52.3201	50.5245	51.3112	52.7405	53.1664	51.2709	48.8428	49.3253	52.1161	52.2697	52.9042
2353.16	50.2329	47.3086	51.6597	48.2231	48.3666	45.437	46.9386	49.0831	44.1268	48.5675	46.9164	39.3228	50.343	50.5268	44.9049	46.1123	47.4061	48.6403	52.9924	52.671	43.4949	51.048	52.5134	49.3257	50.8382	51.1979	51.0646	48.8125	49.7061	49.6698	50.8424	52.7867	50.5503	51.5394	51.2383	51.7334	51.8849	53.1705	52.612	50.6059	51.5489	53.098	53.681	51.3513	48.8196	49.3126	52.2259	52.5359	53.2451
2355.08	50.332	47.128	51.7627	48.0339	48.2479	45.694	47.0726	49.1176	43.784	48.4611	46.9272	39.7769	50.6541	50.8854	44.8772	46.3018	47.1588	48.6023	53.5038	53.2428	43.2087	51.8089	53.214	49.4878	51.1672	51.6059	51.2623	48.7343	49.7586	49.8859	51.1695	53.3066	50.783	51.8356	51.592	51.9904	52.0949	53.5866	52.846	50.6858	51.7461	53.4025	54.1319	51.4326	48.7963	49.2924	52.3227	52.7541	53.5408
2357.01	50.4604	47.0831	51.8896	47.967	48.2444	45.9552	47.2408	49.2021	43.5941	48.4499	47.0029	40.1704	50.9324	51.2122	44.9055	46.4774	47.0486	48.6511	53.969	53.7512	43.1147	52.4257	53.8	49.6829	51.452	51.97	51.4685	48.7548	49.9062	50.0937	51.477	53.7382	50.9961	52.1193	51.9078	52.2348	52.3368	53.9585	53.0789	50.7994	51.944	53.6913	54.508	51.5539	48.8604	49.3485	52.4548	52.9647	53.7997
2358.94	50.5961	47.1558	52.0429	48.0283	48.3209	46.1991	47.4142	49.3331	43.5558	48.5108	47.1452	40.465	51.1293	51.4378	45.0073	46.5749	47.0821	48.7707	54.2614	54.0855	43.1905	52.7672	54.1009	49.7976	51.6346	52.2191	51.6395	48.8559	50.019	50.2274	51.6957	54.0188	51.185	52.3434	52.1317	52.4238	52.5151	54.1991	53.2581	50.8809	52.1262	53.8969	54.7592	51.6848	48.9797	49.4298	52.6112	53.1313	53.9912
2360.87	50.8136	47.3511	52.2555	48.2473	48.5227	46.4313	47.615	49.5516	43.7486	48.7185	47.3989	40.7265	51.3177	51.6434	45.2366	46.7201	47.313	48.9917	54.4682	54.3232	43.4155	52.9488	54.2559	49.9751	51.8242	52.4121	51.8446	49.0633	50.19	50.3743	51.8995	54.2061	51.3965	52.5389	52.3131	52.6091	52.6982	54.3727	53.4354	51.0247	52.3327	54.0755	54.967	51.89	49.202	49.6015	52.8388	53.3248	54.1891
2362.8	51.0332	47.6184	52.4705	48.5252	48.7709	46.6255	47.7945	49.7835	44.023	48.9758	47.6485	40.8924	51.4587	51.791	45.4515	46.7859	47.6082	49.2321	54.5308	54.3822	43.7365	52.9609	54.239	50.124	51.9261	52.5132	52.0338	49.3087	50.4328	50.4579	52.0197	54.278	51.5686	52.6782	52.3957	52.7203	52.8642	54.4637	53.5885	51.1875	52.5046	54.2125	55.0699	52.0884	49.454	49.7994	53.0542	53.4763	54.346
2364.73	51.2844	48.0334	52.7161	48.9267	49.1289	46.8264	48.0163	50.0789	44.4288	49.3216	47.9492	40.9933	51.573	51.894	45.7432	46.8507	48.0269	49.5455	54.5092	54.332	44.1995	52.8501	54.1244	50.2924	52.0005	52.5661	52.2511	49.6507	50.7316	50.5565	52.1204	54.2852	51.7582	52.8261	52.4624	52.8469	53.0345	54.5147	53.7342	51.3928	52.682	54.3353	55.1181	52.3413	49.7652	50.054	53.2958	53.6289	54.4659
2366.66	51.5352	48.5169	52.952	49.4029	49.5403	47.0117	48.2493	50.3771	44.911	49.7123	48.2841	41.0509	51.6248	51.9329	46.0789	46.9173	48.5253	49.8907	54.4293	54.2091	44.7391	52.5861	53.8707	50.4006	52.0722	52.5637	52.4154	50.018	50.9758	50.6222	52.187	54.1744	51.9232	52.9436	52.4927	52.9659	53.1826	54.4972	53.8734	51.608	52.8481	54.4034	55.0941	52.5928	50.1006	50.3099	53.5183	53.7381	54.5512
2368.59	51.8251	49.0807	53.2137	49.9273	50.0013	47.193	48.4902	50.6991	45.4866	50.1722	48.6582	41.0896	51.6848	51.9792	46.4642	47.0311	49.0762	50.2699	54.3496	54.0899	45.3663	52.2662	53.5717	50.5667	52.1231	52.5589	52.5759	50.4293	51.2604	50.6943	52.2622	54.0368	52.0938	53.0663	52.5039	53.0929	53.363	54.4722	54.0283	51.8611	53.0361	54.4656	55.0493	52.8611	50.4845	50.6149	53.7659	53.869	54.6525
2370.51	52.1089	49.628	53.483	50.4555	50.4538	47.3594	48.7175	51.0198	46.0817	50.6354	49.0251	41.0977	51.7374	52.0043	46.8444	47.1505	49.6311	50.6554	54.235	53.9207	45.9983	51.9244	53.2577	50.7294	52.1585	52.5447	52.7395	50.8428	51.5782	50.7593	52.3193	53.89	52.239	53.1462	52.4911	53.1965	53.5094	54.4205	54.1423	52.0948	53.2041	54.5183	54.9992	53.1281	50.8608	50.9195	54.0205	54.0036	54.7278
2372.44	52.4007	50.1734	53.765	51.0235	50.9393	47.5428	48.9716	51.3711	46.7013	51.1037	49.4008	41.1178	51.8121	52.0457	47.2375	47.2889	50.2201	51.0669	54.1489	53.7748	46.6415	51.6405	52.9809	50.9205	52.2719	52.5464	52.9364	51.2779	51.9222	50.8627	52.3994	53.7899	52.412	53.2609	52.5115	53.321	53.6747	54.3929	54.2844	52.3622	53.3826	54.5921	54.9771	53.424	51.2474	51.2444	54.2768	54.1337	54.821
2374.37	52.687	50.7008	54.0368	51.5619	51.4068	47.7255	49.2204	51.7044	47.3047	51.554	49.7643	41.1543	51.8921	52.0988	47.6237	47.4361	50.7749	51.4564	54.078	53.6538	47.2416	51.4091	52.7483	51.1247	52.3792	52.5561	53.1255	51.6985	52.2436	50.9735	52.4816	53.7231	52.5842	53.3893	52.5405	53.4538	53.8474	54.3857	54.4363	52.6222	53.5648	54.6759	54.9525	53.6922	51.626	51.5705	54.5334	54.2652	54.9195
2376.3	52.9827	51.2243	54.3217	52.0829	51.8633	47.9236	49.4842	52.0324	47.9013	51.9998	50.123	41.2171	52.0087	52.1942	48.0058	47.6144	51.3047	51.8406	54.0467	53.5883	47.8387	51.2438	52.6037	51.3516	52.496	52.6038	53.3339	52.1143	52.5686	51.1219	52.6052	53.7066	52.781	53.541	52.6049	53.621	54.0339	54.4213	54.6005	52.8975	53.7723	54.7872	54.9668	53.979	52.0033	51.9051	54.8115	54.439	55.0485
2378.23	53.2738	51.7272	54.6019	52.5866	52.3079	48.1256	49.7595	52.3546	48.4771	52.4291	50.4626	41.3024	52.1461	52.313	48.3685	47.8141	51.7961	52.2068	54.0523	53.565	48.413	51.1268	52.5146	51.5646	52.6513	52.6748	53.5496	52.5114	52.8955	51.2907	52.7468	53.7215	52.9885	53.7013	52.6911	53.7973	54.2316	54.4838	54.7803	53.1899	53.9834	54.9151	55.0132	54.2772	52.3638	52.2373	55.0831	54.6188	55.1974
2380.16	53.5803	52.2285	54.8937	53.0839	52.7638	48.3411	50.0476	52.6907	49.0617	52.863	50.8156	41.4198	52.3114	52.4644	48.7426	48.057	52.2852	52.5803	54.1001	53.5922	48.974	51.0766	52.4864	51.7982	52.8299	52.7859	53.7917	52.9178	53.231	51.4949	52.9222	53.7867	53.2224	53.9012	52.8263	54.0056	54.4568	54.5896	54.9796	53.508	54.2125	55.072	55.0902	54.5852	52.7369	52.5963	55.3743	54.8333	55.3692
2382.09	53.8785	52.7007	55.1802	53.5457	53.1964	48.5585	50.335	53.0114	49.6221	53.2718	51.1629	41.5583	52.4903	52.6309	49.1132	48.3205	52.7495	52.9454	54.1752	53.655	49.4933	51.0761	52.4953	52.0552	53.0134	52.9168	54.0358	53.3067	53.5458	51.7133	53.1103	53.8829	53.4583	54.1172	52.9835	54.2258	54.6837	54.7189	55.1846	53.8255	54.4445	55.2411	55.1874	54.8798	53.0983	52.9482	55.6531	55.0573	55.549
2384.02	54.1639	53.1197	55.4586	53.9658	53.5934	48.7863	50.6213	53.3193	50.1232	53.6447	51.4898	41.7284	52.6878	52.8173	49.466	48.6006	53.1706	53.287	54.2919	53.7625	49.9454	51.1443	52.5711	52.3169	53.2213	53.076	54.2801	53.6678	53.8472	51.9485	53.3161	54.0243	53.6911	54.339	53.1586	54.4573	54.9194	54.8837	55.4034	54.1296	54.6843	55.4322	55.3238	55.1671	53.4301	53.2791	55.9284	55.2848	55.7432
2385.95	54.4224	53.4631	55.7124	54.3117	53.9259	49.0074	50.8814	53.5926	50.5225	53.9589	51.7759	41.9212	52.8943	53.0154	49.7712	48.8619	53.5149	53.581	54.4445	53.9073	50.3116	51.2674	52.7022	52.5524	53.4259	53.2598	54.5096	53.9811	54.1232	52.1749	53.527	54.2006	53.9178	54.5595	53.3507	54.6838	55.1444	55.0678	55.6113	54.3957	54.9099	55.6287	55.4884	55.4226	53.7146	53.5601	56.1852	55.5096	55.9418
2387.87	54.6651	53.7515	55.947	54.5896	54.1978	49.2356	51.1309	53.8408	50.8392	54.2316	52.0375	42.1378	53.1076	53.2273	50.0422	49.1072	53.8033	53.8457	54.634	54.0914	50.6192	51.4443	52.8769	52.7875	53.6391	53.4663	54.7387	54.2548	54.3752	52.4001	53.7454	54.4011	54.146	54.789	53.5605	54.9079	55.3621	55.2704	55.8259	54.6445	55.1342	55.8422	55.6802	55.6562	53.9724	53.8096	56.4194	55.7331	56.1575
2389.8	54.888	53.9941	56.1642	54.8327	54.4283	49.4639	51.3684	54.0689	51.0909	54.4681	52.2706	42.3635	53.3208	53.4414	50.2866	49.3296	54.0496	54.084	54.8354	54.2899	50.872	51.6482	53.0678	53.0144	53.8588	53.6741	54.967	54.4915	54.5977	52.6131	53.958	54.611	54.3656	55.0108	53.7673	55.122	55.5719	55.4771	56.0403	54.8653	55.3482	56.0551	55.8815	55.8787	54.2026	54.0328	56.6375	55.9431	56.3693
2391.73	55.1079	54.2194	56.3832	55.0685	54.6576	49.6931	51.5988	54.2964	51.3207	54.6902	52.4944	42.5979	53.5461	53.6664	50.5222	49.5487	54.2794	54.3113	55.0472	54.5033	51.1033	51.8747	53.2825	53.2407	54.08	53.8907	55.1955	54.7207	54.8281	52.8273	54.1765	54.8311	54.5899	55.2372	53.9839	55.3446	55.7947	55.6933	56.2658	55.0857	55.5701	56.2734	56.0982	56.0978	54.4262	54.2504	56.8639	56.1597	56.5824
2393.66	55.321	54.4339	56.599	55.2843	54.875	49.9159	51.8204	54.5159	51.5411	54.9046	52.7123	42.8334	53.7658	53.889	50.7449	49.764	54.5018	54.5334	55.2595	54.7161	51.327	52.101	53.5002	53.4605	54.29	54.1077	55.4102	54.947	55.0604	53.0391	54.3929	55.0491	54.8154	55.4563	54.1995	55.563	56.0081	55.9054	56.4851	55.3074	55.7914	56.4854	56.309	56.3076	54.6414	54.4624	57.0838	56.3745	56.7927
2395.59	55.5389	54.656	56.817	55.5078	55.0931	50.1441	52.0495	54.7372	51.7683	55.1221	52.9356	43.0777	53.989	54.1128	50.9719	49.9888	54.7237	54.7588	55.4781	54.9339	51.5613	52.3349	53.7256	53.6889	54.5193	54.3307	55.6299	55.1714	55.2739	53.2561	54.6133	55.2721	55.0441	55.6808	54.4283	55.7849	56.2227	56.1253	56.7045	55.5312	56.0125	56.6995	56.5226	56.5266	54.8593	54.6805	57.3022	56.5934	57.0097
2397.52	55.7499	54.8788	57.0256	55.7251	55.3051	50.3693	52.2718	54.9525	51.9837	55.3329	53.1522	43.318	54.2081	54.3323	51.1978	50.2082	54.938	54.9736	55.6982	55.1513	51.7866	52.5595	53.9421	53.9046	54.744	54.5489	55.8457	55.3853	55.4785	53.4643	54.8312	55.4923	55.2569	55.9006	54.6474	55.997	56.4315	56.337	56.9171	55.7499	56.225	56.9109	56.733	56.7402	55.0738	54.8894	57.512	56.8048	57.2181
2399.45	55.9653	55.0974	57.2385	55.9406	55.5206	50.5941	52.4914	55.1698	52.2028	55.5498	53.3665	43.5556	54.4287	54.5562	51.4261	50.4252	55.1574	55.1896	55.917	55.3708	52.0112	52.7844	54.1623	54.1164	54.9582	54.7658	56.0646	55.6015	55.7054	53.6774	55.0545	55.7158	55.4758	56.1228	54.8591	56.2101	56.6487	56.5522	57.1325	55.9731	56.4479	57.1326	56.9476	56.9529	55.2938	55.1036	57.7268	57.0196	57.4296
2401.38	56.175	55.3059	57.4441	56.1512	55.7299	50.8145	52.7081	55.3826	52.414	55.7564	53.5785	43.7896	54.6406	54.7702	51.6397	50.6308	55.3649	55.3997	56.1278	55.5828	52.2323	53.0051	54.3753	54.3289	55.1756	54.9778	56.2737	55.8145	55.9215	53.8788	55.2664	55.9312	55.6929	56.336	55.0677	56.4191	56.861	56.7619	57.3421	56.1796	56.6665	57.3384	57.1542	57.1577	55.5073	55.3101	57.9324	57.2231	57.6364
2403.3	56.3846	55.5183	57.6512	56.3704	55.9384	51.0384	52.9273	55.5966	52.6221	55.9664	53.7934	44.0251	54.8548	54.9866	51.8586	50.8386	55.5745	55.6102	56.3424	55.7966	52.4544	53.231	54.5886	54.5458	55.3936	55.1921	56.4835	56.0306	56.1288	54.0758	55.4791	56.1469	55.909	56.5546	55.2832	56.6299	57.0723	56.9712	57.5551	56.3909	56.8826	57.543	57.3604	57.3673	55.7175	55.5131	58.1364	57.4289	57.85
2405.23	56.5875	55.7254	57.8509	56.5723	56.1359	51.2547	53.1363	55.8053	52.822	56.1699	54.0042	44.2564	55.064	55.1973	52.0723	51.0391	55.7819	55.8171	56.5511	56.0014	52.6692	53.4488	54.7961	54.7513	55.6007	55.3972	56.6913	56.2386	56.3366	54.2745	55.6812	56.3515	56.1179	56.7624	55.4879	56.832	57.271	57.1715	57.7604	56.5949	57.0892	57.746	57.5606	57.5667	55.9226	55.7105	58.339	57.6274	58.0541
2407.16	56.7909	55.9369	58.0545	56.7737	56.3421	51.4741	53.3511	56.0161	53.0267	56.3748	54.2194	44.4886	55.2764	55.4099	52.2883	51.2436	55.9956	56.0293	56.7645	56.2114	52.8892	53.6688	55.0068	54.9683	55.8223	55.609	56.9035	56.4473	56.5436	54.4778	55.8905	56.5654	56.3352	56.9725	55.6895	57.0402	57.4797	57.3803	57.9715	56.7978	57.2992	57.9528	57.7676	57.7707	56.1339	55.91	58.5471	57.8337	58.2604
2409.09	56.9908	56.1493	58.2563	56.985	56.548	51.6899	53.5622	56.223	53.2286	56.5768	54.4311	44.7194	55.4825	55.6157	52.4993	51.4466	56.2057	56.2387	56.9763	56.4226	53.1061	53.8844	55.2142	55.1775	56.0328	55.8207	57.1139	56.6524	56.7349	54.6789	56.1006	56.7777	56.5464	57.1803	55.8915	57.2464	57.6884	57.5855	58.1836	57.0046	57.5073	58.1535	57.972	57.9721	56.3401	56.1057	58.75	58.0357	58.4631
2411.02	57.1994	56.3635	58.4645	57.1995	56.7529	51.9126	53.7838	56.4373	53.4375	56.7854	54.6455	44.9546	55.6918	55.8255	52.7142	51.6541	56.417	56.453	57.1901	56.6375	53.3263	54.1011	55.4276	55.3897	56.2378	56.037	57.3226	56.866	56.9443	54.8872	56.3169	56.9961	56.7603	57.3995	56.1037	57.4568	57.8931	57.7955	58.396	57.2162	57.7213	58.3588	58.1766	58.1749	56.5511	56.3088	58.9556	58.2375	58.6691
2412.95	57.4061	56.5702	58.6684	57.4025	56.9551	52.1323	54.0012	56.6442	53.639	56.9929	54.8559	45.1848	55.9007	56.0366	52.9315	51.8614	56.6237	56.663	57.4009	56.8493	53.5404	54.3153	55.6391	55.5987	56.4475	56.2442	57.5248	57.078	57.1638	55.0929	56.5269	57.2102	56.9691	57.6103	56.3086	57.6613	58.0913	57.9971	58.6011	57.4166	57.932	58.5647	58.3783	58.3754	56.7613	56.5106	59.1537	58.438	58.8756
2414.88	57.6158	56.7848	58.8769	57.6154	57.1693	52.3541	54.2197	56.8513	53.8488	57.2047	55.0703	45.4193	56.1141	56.2531	53.1546	52.0762	56.833	56.8756	57.6148	57.0608	53.7649	54.5402	55.8567	55.814	56.6618	56.4544	57.738	57.2922	57.3789	55.3002	56.7405	57.424	57.1858	57.8223	56.5228	57.8693	58.307	58.2076	58.8188	57.6286	58.1463	58.7747	58.5881	58.589	56.9776	56.7211	59.3592	58.6477	59.0875
2416.81	57.8171	56.9942	59.0777	57.8215	57.3786	52.571	54.4294	57.0593	54.0581	57.4081	55.2809	45.6519	56.3201	56.4608	53.3689	52.2867	57.0377	57.0831	57.8197	57.2643	53.9882	54.7557	56.0678	56.0204	56.869	56.6641	57.9488	57.4956	57.5753	55.4973	56.945	57.6285	57.3959	58.0326	56.7308	58.0736	58.5136	58.4158	59.025	57.8395	58.3527	58.9748	58.791	58.7917	57.1844	56.9233	59.5593	58.8474	59.2866
2418.74	58.0225	57.2029	59.2781	58.0221	57.5861	52.7897	54.64	57.2729	54.2666	57.6133	55.4957	45.8849	56.5285	56.6691	53.5792	52.495	57.2463	57.2921	58.0274	57.4733	54.2064	54.9739	56.2761	56.2321	57.0834	56.8749	58.1583	57.7014	57.7833	55.6974	57.1549	57.8386	57.6061	58.2452	56.9359	58.2803	58.7124	58.6176	59.2323	58.0483	58.5583	59.1758	58.9927	58.9909	57.3886	57.1219	59.76	59.0483	59.4843
2420.66	58.2235	57.4029	59.4689	58.2223	57.7805	53.003	54.8436	57.4776	54.4601	57.8128	55.7032	46.1102	56.7303	56.871	53.7817	52.689	57.4452	57.4905	58.2281	57.6785	54.4107	55.1876	56.4761	56.4404	57.2811	57.0769	58.3612	57.9034	57.9916	55.8901	57.3583	58.0436	57.8073	58.444	57.136	58.4798	58.907	58.8082	59.4357	58.2468	58.7556	59.3713	59.1884	59.186	57.5906	57.3141	59.9548	59.2391	59.6789
2422.59	58.4235	57.6045	59.661	58.4266	57.9743	53.218	55.0491	57.6815	54.6545	58.0136	55.91	46.3346	56.9311	57.0747	53.9939	52.889	57.6439	57.6908	58.4315	57.8837	54.621	55.3963	56.6768	56.6429	57.4853	57.2805	58.568	58.108	58.1901	56.0831	57.5646	58.2489	58.0115	58.6469	57.3335	58.6786	59.1089	59.0074	59.6392	58.4453	58.9609	59.5651	59.3906	59.3817	57.7958	57.5103	60.1513	59.4339	59.879
2424.52	58.6181	57.8049	59.8551	58.6143	58.1685	53.43	55.2531	57.8758	54.8422	58.208	56.1129	46.5553	57.1285	57.2731	54.1996	53.0832	57.8437	57.8885	58.6276	58.0814	54.8286	55.6004	56.8725	56.8354	57.6897	57.4829	58.7674	58.3094	58.3833	56.2696	57.7658	58.4479	58.2079	58.85	57.5211	58.871	59.3045	59.2034	59.8369	58.6346	59.1588	59.7566	59.5846	59.569	57.9948	57.7005	60.3436	59.6245	60.0723
2426.45	58.8192	58.0103	60.056	58.8176	58.3675	53.6455	55.4641	58.0739	55.0346	58.408	56.3227	46.7802	57.3331	57.476	54.4044	53.276	58.0493	58.0952	58.824	58.2802	55.0417	55.8099	57.0767	57.0443	57.8988	57.6871	58.9676	58.513	58.5894	56.4628	57.9708	58.6524	58.4107	59.0599	57.7217	59.0694	59.5023	59.4018	60.0379	58.8252	59.3595	59.9565	59.7842	59.7607	58.1973	57.8895	60.5413	59.8145	60.2704
2428.38	59.0169	58.2126	60.2506	59.021	58.561	53.8576	55.6728	58.2735	55.2277	58.6055	56.526	47.0039	57.5335	57.6776	54.6068	53.4713	58.2503	58.2995	59.0217	58.4789	55.2434	56.0133	57.2765	57.2471	58.0993	57.8883	59.1653	58.7125	58.7927	56.6588	58.167	58.8498	58.6143	59.2607	57.917	59.2668	59.6945	59.5995	60.2327	59.0164	59.558	60.1524	59.9829	59.9558	58.3969	58.078	60.7385	60.0034	60.463
2430.31	59.2184	58.4201	60.447	59.2191	58.7579	54.0723	55.8812	58.4761	55.4285	58.8105	56.7322	47.2294	57.737	57.8829	54.8158	53.6754	58.4548	58.5042	59.2262	58.6855	55.455	56.2267	57.4798	57.4455	58.2997	58.0912	59.3669	58.9148	58.9912	56.8592	58.3707	59.0584	58.8276	59.4657	58.1243	59.4738	59.8979	59.8006	60.4395	59.2244	59.7593	60.3547	60.1843	60.1553	58.6009	58.2777	60.9374	60.2019	60.6626
2432.24	59.4158	58.6207	60.6403	59.4128	58.959	54.2844	56.0861	58.6708	55.6302	59.0116	56.9434	47.4559	57.9382	58.081	55.0264	53.8787	58.6518	58.6988	59.4283	58.889	55.6673	56.4322	57.6827	57.6505	58.4996	58.2922	59.565	59.1141	59.1793	57.0538	58.5709	59.2604	59.0332	59.6713	58.3321	59.6737	60.099	59.9941	60.649	59.4266	59.957	60.5483	60.3765	60.3514	58.7991	58.4713	61.131	60.4001	60.8551
2434.17	59.6147	58.8222	60.8396	59.6122	59.1662	54.5001	56.2954	58.8747	55.8325	59.2122	57.1584	47.6877	58.1415	58.287	55.2393	54.0854	58.8535	58.9011	59.6326	59.0968	55.8779	56.6359	57.8863	57.8628	58.7014	58.5002	59.7693	59.3195	59.384	57.2485	58.7764	59.4603	59.2371	59.877	58.5345	59.8711	60.2964	60.1926	60.8577	59.6349	60.1615	60.7427	60.574	60.5498	59.0013	58.67	61.3275	60.601	61.0488
2436.09	59.8072	59.0198	61.0282	59.806	59.3567	54.7089	56.4931	59.0759	56.0263	59.4075	57.3633	47.9135	58.3362	58.4859	55.444	54.2849	59.0516	59.101	59.8279	59.2946	56.0807	56.8371	58.0839	58.0546	58.896	58.6966	59.9661	59.5193	59.5935	57.4383	58.9757	59.6544	59.4312	60.0691	58.7232	60.059	60.4894	60.384	61.0507	59.8307	60.3555	60.93	60.771	60.7363	59.2011	58.8631	61.52	60.7892	61.2397
2438.02	60.0003	59.2202	61.2189	60.0065	59.5434	54.9199	56.6941	59.2731	56.2205	59.6056	57.5664	48.1352	58.5336	58.6827	55.6487	54.4802	59.2457	59.2963	60.0249	59.4915	56.2894	57.0432	58.2844	58.252	59.0958	58.8919	60.1642	59.7175	59.7886	57.6255	59.1764	59.855	59.6306	60.2682	58.9211	60.2538	60.6862	60.5758	61.2454	60.0158	60.5486	61.1226	60.9665	60.9256	59.3981	59.0492	61.7155	60.9775	61.4298
2439.95	60.188	59.4068	61.4051	60.201	59.7266	55.1229	56.891	59.463	56.4038	59.7935	57.7641	48.3515	58.7229	58.8726	55.8429	54.6649	59.4378	59.4875	60.2178	59.686	56.491	57.2471	58.473	58.4498	59.2817	59.0808	60.3596	59.9071	59.9688	57.8052	59.3705	60.0501	59.8262	60.4676	59.1045	60.4386	60.8683	60.7575	61.4337	60.1945	60.7381	61.3091	61.1512	61.1134	59.5873	59.2256	61.8995	61.1589	61.6139
2441.88	60.3775	59.6072	61.5925	60.3842	59.9183	55.3255	57.088	59.6576	56.5884	59.9838	57.9671	48.5697	58.9132	59.0654	56.0401	54.8509	59.6345	59.6841	60.4128	59.8833	56.6917	57.4526	58.6635	58.6467	59.4758	59.2748	60.5559	60.0991	60.1658	57.9872	59.568	60.2482	60.023	60.6669	59.2879	60.6262	61.0557	60.9422	61.6248	60.3832	60.9299	61.4975	61.345	61.3003	59.7811	59.4084	62.0874	61.3453	61.8003
2443.81	60.5635	59.8034	61.7762	60.5606	60.1025	55.5267	57.281	59.8459	56.7676	60.1711	58.1644	48.7843	59.1026	59.2543	56.2299	55.0312	59.8244	59.8733	60.5974	60.0678	56.8866	57.6494	58.8467	58.8338	59.6742	59.4695	60.7412	60.292	60.3578	58.1683	59.7607	60.4396	60.2123	60.8567	59.4736	60.8135	61.2412	61.1273	61.8126	60.564	61.1172	61.6802	61.5311	61.4786	59.9736	59.592	62.2783	61.5318	61.9822
2445.74	60.758	59.9941	61.966	60.7587	60.2909	55.7348	57.4816	60.0351	56.9538	60.3637	58.3647	49.0036	59.2949	59.4458	56.4268	55.2208	60.0199	60.0722	60.7888	60.2587	57.0932	57.8493	59.0427	59.0302	59.8764	59.6679	60.9315	60.4907	60.5398	58.3589	59.959	60.6365	60.4034	61.0491	59.6691	61.0092	61.4274	61.32	62.0085	60.7544	61.3098	61.8719	61.7201	61.6684	60.171	59.7784	62.4685	61.7164	62.1679
2447.67	60.9497	60.1815	62.151	60.9534	60.4784	55.9396	57.6817	60.2242	57.1401	60.5533	58.5616	49.2206	59.4869	59.6393	56.6271	55.4121	60.2109	60.2631	60.9795	60.45	57.2989	58.0471	59.2476	59.2278	60.0687	59.8607	61.1258	60.6814	60.7264	58.5476	60.1525	60.8305	60.5959	61.2394	59.8633	61.2008	61.6165	61.5078	62.1959	60.9422	61.4977	62.0587	61.9046	61.8552	60.3622	59.9591	62.6495	61.8937	62.3497
2449.6	61.146	60.3819	62.3437	61.1457	60.6668	56.1466	57.8853	60.4178	57.3376	60.7493	58.7658	49.4438	59.6854	59.8415	56.8371	55.6124	60.4055	60.4558	61.1731	60.6456	57.505	58.2558	59.4477	59.4182	60.2704	60.0583	61.3264	60.8764	60.9299	58.7402	60.3486	61.029	60.7976	61.4344	60.0652	61.3986	61.8168	61.7039	62.3913	61.1279	61.6949	62.2486	62.0959	62.0466	60.5593	60.1501	62.8397	62.0851	62.5415
2451.53	61.3318	60.5763	62.528	61.3339	60.8571	56.3519	58.0839	60.6066	57.5283	60.9388	58.9641	49.6634	59.8756	60.0327	57.0372	55.8047	60.5975	60.6465	61.3651	60.8378	57.7048	58.4561	59.6345	59.6021	60.4637	60.2498	61.5171	61.0675	61.1185	58.9246	60.5377	61.2202	60.9882	61.6266	60.2516	61.5854	62.0059	61.8935	62.5764	61.3064	61.8905	62.4376	62.2858	62.2325	60.7489	60.3323	63.024	62.2776	62.7285
2453.45	61.5184	60.7721	62.7128	61.5235	61.052	56.5592	58.2814	60.7966	57.721	61.1321	59.1619	49.8828	60.0661	60.2209	57.2346	55.9986	60.7872	60.8414	61.5608	61.0354	57.9117	58.6559	59.828	59.798	60.6569	60.4447	61.7101	61.2604	61.2984	59.1115	60.7374	61.4158	61.1831	61.8279	60.4379	61.7724	62.1938	62.0803	62.7611	61.4928	62.0838	62.6262	62.4751	62.419	60.9419	60.5192	63.211	62.4658	62.9178
2455.38	61.6995	60.9664	62.8917	61.7048	61.2285	56.7595	58.4727	60.9827	57.9053	61.317	59.3523	50.0965	60.2519	60.4068	57.4292	56.1858	60.9684	61.0282	61.747	61.2231	58.1089	58.8439	60.0106	59.9856	60.8347	60.6321	61.8953	61.4478	61.4894	59.2876	60.9258	61.6032	61.3717	62.0172	60.6225	61.9526	62.3718	62.2571	62.9445	61.673	62.2675	62.8035	62.6546	62.5952	61.1273	60.6969	63.3932	62.641	63.0965
2457.31	61.8805	61.1523	63.0725	61.8888	61.4068	56.9557	58.6644	61.1703	58.0862	61.4996	59.5435	50.3106	60.4392	60.5965	57.6222	56.3666	61.1546	61.2139	61.933	61.4081	58.3023	59.0361	60.1977	60.1731	61.0167	60.8174	62.0828	61.6372	61.6864	59.4643	61.1102	61.7869	61.5605	62.2054	60.8074	62.1367	62.5562	62.4366	63.1282	61.8497	62.4509	62.985	62.8379	62.7785	61.3124	60.8703	63.5757	62.8181	63.2754
2459.24	62.0595	61.3242	63.2494	62.0666	61.584	57.1481	58.8483	61.349	58.257	61.6786	59.7333	50.5211	60.6214	60.779	57.8038	56.5356	61.3374	61.3926	62.1115	61.5846	58.4869	59.2304	60.3818	60.3536	61.2027	60.9986	62.2626	61.8162	61.8538	59.6365	61.2948	61.9671	61.7414	62.3831	60.9827	62.3131	62.734	62.6136	63.3008	62.0182	62.6253	63.1621	63.0161	62.9543	61.4928	61.0375	63.7502	62.9878	63.4503
2461.17	62.2463	61.509	63.4307	62.2452	61.7636	57.347	59.0402	61.5368	58.4293	61.8634	59.9253	50.7312	60.8087	60.963	57.9889	56.7123	61.5255	61.5765	62.2948	61.7677	58.6821	59.4273	60.5655	60.5404	61.3859	61.1819	62.4432	62.0016	62.0251	59.8128	61.4841	62.1538	61.9278	62.5665	61.1612	62.4946	62.9123	62.7924	63.48	62.1935	62.8081	63.344	63.1983	63.1312	61.6794	61.2115	63.9287	63.1648	63.6282
2463.1	62.4261	61.6945	63.6059	62.4245	61.9389	57.5438	59.2317	61.7148	58.6031	62.0463	60.1121	50.9409	60.9879	61.1439	58.1781	56.8933	61.7087	61.7594	62.476	61.9514	58.8765	59.6159	60.7467	60.7206	61.5608	61.3629	62.6228	62.1847	62.2139	59.9871	61.6662	62.3387	62.1106	62.7543	61.3351	62.674	63.0864	62.9662	63.6513	62.3547	62.9885	63.5237	63.3735	63.3084	61.8621	61.3832	64.1022	63.3392	63.8033
2465.03	62.6121	61.8852	63.789	62.6096	62.1195	57.7454	59.4285	61.8951	58.7864	62.2349	60.303	51.1575	61.1737	61.3302	58.3734	57.0783	61.8946	61.9508	62.6636	62.1405	59.0693	59.8094	60.9322	60.9082	61.7581	61.5558	62.8101	62.3726	62.4049	60.1684	61.8573	62.5318	62.297	62.9443	61.5252	62.8623	63.2702	63.1476	63.8315	62.5305	63.1731	63.7058	63.5567	63.4944	62.0464	61.5593	64.2818	63.5181	63.9814
2466.96	62.7943	62.0697	63.9704	62.7875	62.2985	57.939	59.618	62.0761	58.9681	62.4173	60.4879	51.3669	61.359	61.5133	58.5642	57.2595	62.0759	62.1347	62.8445	62.3247	59.2583	59.9934	61.1127	61.0933	61.9426	61.7463	62.9931	62.5556	62.5819	60.3445	62.0438	62.7152	62.4814	63.1236	61.7076	63.0448	63.45	63.3259	64.0097	62.7124	63.352	63.8837	63.7409	63.6747	62.2268	61.7338	64.4603	63.6951	64.1607
2468.88	62.9763	62.2594	64.153	62.967	62.4845	58.1337	59.8087	62.2644	59.1583	62.6039	60.6776	51.5806	61.5472	61.7036	58.7642	57.4521	62.2594	62.3179	63.0292	62.5109	59.4631	60.185	61.3017	61.2832	62.1331	61.9357	63.1778	62.7419	62.7666	60.5252	62.2294	62.8992	62.672	63.3113	61.8913	63.2264	63.6358	63.5102	64.1898	62.8947	63.5379	64.0679	63.9274	63.8547	62.4159	61.9163	64.6434	63.8824	64.3406
2470.81	63.1519	62.4409	64.3295	63.1457	62.665	58.323	59.9911	62.4446	59.3405	62.7864	60.8626	51.7926	61.7259	61.8852	58.9554	57.6364	62.4387	62.4979	63.2058	62.691	59.6561	60.3766	61.488	61.4665	62.319	62.1146	63.3568	62.9249	62.9497	60.6974	62.4107	63.0776	62.8567	63.5001	62.0765	63.4013	63.8163	63.6868	64.3627	63.0708	63.7156	64.2461	64.1022	64.0328	62.6013	62.0909	64.8199	64.0602	64.5126
2472.74	63.3302	62.618	64.5076	63.3282	62.8423	58.5173	60.1786	62.629	59.5216	62.9677	61.0509	52.0034	61.9084	62.0689	59.1381	57.8153	62.6165	62.6776	63.3844	62.8743	59.8438	60.5668	61.6736	61.6498	62.502	62.2932	63.5369	63.1078	63.1324	60.866	62.5985	63.2586	63.0421	63.6881	62.2554	63.5802	63.992	63.8621	64.5429	63.2489	63.8958	64.421	64.2809	64.2133	62.7836	62.264	64.997	64.2335	64.6909
2474.67	63.5017	62.7947	64.6734	63.4969	63.0057	58.7054	60.3576	62.8041	59.6889	63.1397	61.2296	52.2074	62.0835	62.2451	59.316	57.9858	62.7917	62.8506	63.5574	63.0505	60.0236	60.748	61.8432	61.8209	62.6714	62.4694	63.7111	63.2783	63.3062	61.0303	62.7757	63.4328	63.2194	63.8617	62.4182	63.7466	64.1532	64.025	64.7108	63.4054	64.0702	64.5875	64.4563	64.3824	62.9576	62.4279	65.1645	64.3943	64.857
2476.6	63.6764	62.9801	64.845	63.6727	63.1771	58.8936	60.5396	62.9796	59.8573	63.3156	61.4104	52.4124	62.2567	62.42	59.4985	58.1556	62.9691	63.0277	63.7345	63.2258	60.2121	60.935	62.0185	62.0012	62.8435	62.6487	63.8859	63.4549	63.4807	61.1976	62.9555	63.6143	63.3995	64.0364	62.5939	63.9219	64.3213	64.1949	64.8793	63.5685	64.2408	64.7644	64.6255	64.557	63.1342	62.5927	65.3359	64.5609	65.0256
2478.53	63.848	63.1519	65.0149	63.845	63.3462	59.0786	60.7182	63.1502	60.023	63.4868	61.5853	52.6118	62.4261	62.592	59.6745	58.3175	63.1418	63.2011	63.9082	63.3966	60.392	61.1139	62.1971	62.1793	63.0126	62.8208	64.0582	63.6281	63.6467	61.3589	63.1287	63.7882	63.5666	64.2115	62.7624	64.0927	64.4868	64.3597	65.0494	63.7325	64.4075	64.9346	64.7908	64.7234	63.3075	62.7535	65.502	64.7262	65.188
2480.46	64.0221	63.3318	65.1895	64.0165	63.5183	59.271	60.9069	63.3263	60.1939	63.6628	61.7654	52.8184	62.6021	62.7714	59.8576	58.4921	63.3244	63.3841	64.0884	63.5757	60.5759	61.3019	62.3775	62.3592	63.191	62.9992	64.2362	63.809	63.8219	61.5279	63.3059	63.9653	63.7411	64.3887	62.9374	64.2693	64.6629	64.5352	65.2246	63.9013	64.5883	65.1111	64.969	64.8924	63.4856	62.9204	65.6701	64.891	65.3572
2482.39	64.1957	63.5129	65.3548	64.1846	63.6888	59.4569	61.0897	63.4977	60.3637	63.8317	61.9426	53.0241	62.7787	62.9474	60.039	58.6638	63.4958	63.5579	64.2616	63.7517	60.7631	61.4858	62.5473	62.537	63.3688	63.1756	64.4127	63.9834	63.9922	61.6991	63.4847	64.1395	63.9193	64.5634	63.11	64.4422	64.8346	64.7047	65.3885	64.0686	64.7654	65.2809	65.1383	65.0581	63.6595	63.0848	65.836	65.057	65.5249
2484.32	64.3769	63.6934	65.5264	64.3656	63.8698	59.6469	61.2755	63.676	60.5455	64.0089	62.1253	53.2322	62.9625	63.1301	60.223	58.8416	63.6756	63.7371	64.441	63.931	60.9598	61.6783	62.7245	62.7251	63.5488	63.3554	64.5926	64.1595	64.1609	61.8757	63.6749	64.3239	64.1033	64.7497	63.2854	64.6231	65.0076	64.8779	65.5603	64.2437	64.9415	65.4573	65.309	65.2337	63.8382	63.2569	66.011	65.2376	65.6965
2486.24	64.547	63.8633	65.692	64.5376	64.0401	59.8303	61.4583	63.8508	60.7249	64.1816	62.3028	53.4371	63.1369	63.3041	60.4068	59.0212	63.8501	63.9085	64.6166	64.1066	61.1449	61.8657	62.899	62.8996	63.7249	63.5314	64.7642	64.3325	64.3281	62.0449	63.8493	64.4981	64.2783	64.928	63.4642	64.7963	65.1722	65.0463	65.7317	64.4109	65.113	65.6292	65.4812	65.404	64.0141	63.4273	66.1785	65.4071	65.8637
2488.17	64.7205	64.039	65.8647	64.7123	64.2084	60.0191	61.64	64.0291	60.9047	64.3591	62.4832	53.6441	63.3101	63.4785	60.5946	59.2058	64.0252	64.0851	64.7913	64.2835	61.3213	62.0472	63.0821	63.0708	63.9092	63.7094	64.9359	64.5111	64.5066	62.2146	64.0256	64.6769	64.4562	65.1046	63.6429	64.9676	65.3464	65.2175	65.9057	64.5835	65.2903	65.8064	65.6596	65.5802	64.1936	63.5971	66.3477	65.5767	66.0326
2490.1	64.8883	64.2117	66.0308	64.8864	64.3751	60.2027	61.8109	64.1982	61.0739	64.5279	62.6579	53.8442	63.4788	63.6495	60.7763	59.3789	64.1936	64.2544	64.9573	64.4518	61.4987	62.2197	63.256	63.2426	64.0824	63.8791	65.1024	64.683	64.6805	62.3707	64.1945	64.8431	64.6322	65.2766	63.8032	65.1316	65.5142	65.3816	66.071	64.742	65.4588	65.9754	65.8231	65.749	64.3642	63.7567	66.5144	65.7397	66.1944
2492.03	65.0506	64.3845	66.1943	65.052	64.5441	60.3851	61.9888	64.3672	61.2396	64.6959	62.8324	54.0454	63.6496	63.8216	60.9551	59.545	64.3633	64.4254	65.127	64.6235	61.683	62.3996	63.4313	63.4201	64.2609	64.0506	65.2757	64.8535	64.8555	62.5327	64.3683	65.0156	64.8112	65.4537	63.9671	65.3013	65.6814	65.5464	66.24	64.906	65.6277	66.1408	65.9868	65.9147	64.5343	63.9211	66.6804	65.9001	66.3601
2493.96	65.2083	64.552	66.3511	65.2065	64.7012	60.5591	62.1596	64.5312	61.3998	64.8557	63.0011	54.2423	63.8102	63.9856	61.1248	59.7011	64.5268	64.5929	65.2881	64.7868	61.8592	62.5763	63.5956	63.5881	64.4318	64.213	65.4421	65.0151	65.0208	62.6889	64.5417	65.1908	64.9761	65.6203	64.1298	65.4609	65.8411	65.7063	66.3987	65.0609	65.7877	66.3026	66.1459	66.0731	64.6974	64.0764	66.8374	66.0548	66.5138
2495.89	65.3787	64.7218	66.5122	65.3748	64.8627	60.7391	62.3325	64.7008	61.561	65.021	63.1737	54.4395	63.9774	64.1554	61.2937	59.8618	64.6935	64.7611	65.4567	64.9548	62.0386	62.7518	63.7584	63.7595	64.5957	64.3815	65.6089	65.1853	65.1839	62.8441	64.7155	65.3617	65.1455	65.7901	64.2937	65.6266	65.9983	65.8684	66.5624	65.2178	65.9531	66.4662	66.3108	66.2338	64.8658	64.2325	67.0014	66.2158	66.6738
2497.82	65.5388	64.8813	66.669	65.5351	65.0211	60.9162	62.5044	64.8646	61.7184	65.1815	63.3418	54.6316	64.1394	64.317	61.4599	60.0188	64.8573	64.9216	65.621	65.1173	62.2175	62.9205	63.9198	63.9297	64.7534	64.5484	65.7707	65.349	65.3409	63.0013	64.878	65.5242	65.3102	65.9581	64.4507	65.7901	66.1512	66.0237	66.7293	65.3765	66.1169	66.6252	66.473	66.3903	65.0289	64.3847	67.1626	66.3737	66.8305
2499.75	65.7032	65.0488	66.8333	65.7003	65.1817	61.095	62.6803	65.033	61.8861	65.3479	63.5148	54.8299	64.3087	64.4867	61.6375	60.1868	65.0242	65.0912	65.79	65.2835	62.3974	63.0954	64.0933	64.0968	64.9254	64.7207	65.9404	65.515	65.513	63.1641	65.0524	65.6948	65.4825	66.1326	64.6201	65.9585	66.3219	66.1921	66.8979	65.5416	66.2857	66.7932	66.6411	66.5558	65.196	64.5457	67.3219	66.5321	66.9925
2501.67	65.8711	65.2208	66.9954	65.8739	65.3434	61.2701	62.8527	65.1972	62.0522	65.5141	63.6864	55.0274	64.4751	64.655	61.8142	60.3537	65.1884	65.2584	65.9534	65.4463	62.5683	63.2701	64.2617	64.2603	65.0837	64.8903	66.1053	65.6804	65.6746	63.3199	65.2268	65.8632	65.6491	66.296	64.7825	66.1189	66.4871	66.353	67.0625	65.6985	66.4495	66.9578	66.8043	66.7158	65.3619	64.7027	67.478	66.6876	67.1488
2503.6	66.0427	65.3966	67.1609	66.0448	65.5174	61.45	63.0307	65.3628	62.2216	65.6822	63.8609	55.2259	64.644	64.8256	61.9922	60.5255	65.3629	65.4292	66.1211	65.6185	62.7516	63.4537	64.4325	64.4378	65.2489	65.0583	66.2694	65.8503	65.8345	63.4868	65.4017	66.0369	65.8177	66.4576	64.9513	66.2868	66.6468	66.5164	67.2384	65.8667	66.6222	67.1205	66.9698	66.877	65.5358	64.8693	67.6401	66.8485	67.3128
2505.53	66.2013	65.5639	67.3153	66.1992	65.6816	61.6258	63.2007	65.5265	62.3849	65.8424	64.0268	55.4202	64.8073	64.9868	62.1634	60.6959	65.5267	65.5921	66.2842	65.7846	62.9267	63.6301	64.6028	64.6048	65.4192	65.2215	66.4304	66.0166	66.0013	63.6457	65.5662	66.2022	65.9835	66.6194	65.1158	66.4465	66.7997	66.6746	67.3948	66.0332	66.7889	67.2781	67.13	67.0391	65.7036	65.0322	67.7956	67.008	67.469
2507.46	66.3629	65.7311	67.471	66.3643	65.8425	61.8056	63.3718	65.6921	62.5521	66.0083	64.1992	55.6169	64.9741	65.1519	62.3383	60.8683	65.6915	65.7587	66.4471	65.9482	63.1058	63.805	64.7765	64.7672	65.5878	65.3851	66.5959	66.1838	66.169	63.8008	65.7313	66.3641	66.154	66.7971	65.2782	66.6088	66.9622	66.8368	67.5536	66.1971	66.9569	67.4413	67.2917	67.2003	65.8687	65.1931	67.9566	67.1711	67.6286
2509.39	66.5198	65.8889	67.6273	66.5241	65.9966	61.9772	63.5338	65.8487	62.7114	66.165	64.3681	55.8075	65.1337	65.3147	62.5063	61.0249	65.8461	65.9149	66.6032	66.1035	63.2739	63.9753	64.9371	64.9284	65.7454	65.5448	66.7553	66.339	66.3198	63.9462	65.8896	66.5204	66.3163	66.9597	65.4316	66.7611	67.1185	66.9888	67.7098	66.3535	67.1129	67.5958	67.4454	67.3521	66.0232	65.3422	68.1103	67.3212	67.7759
2511.32	66.6758	66.0457	67.7801	66.6746	66.1525	62.145	63.6959	66.0103	62.8706	66.3239	64.5332	55.9954	65.2926	65.4777	62.6738	61.1776	66.0031	66.0715	66.7627	66.261	63.4435	64.1433	65.093	65.09	65.9131	65.7065	66.9158	66.4981	66.4765	64.0932	66.0539	66.6825	66.4833	67.1219	65.5844	66.9157	67.2763	67.1401	67.8721	66.5118	67.2736	67.7502	67.5994	67.5055	66.1839	65.4912	68.2632	67.475	67.9254
2513.25	66.8248	66.1933	67.9245	66.8274	66.2997	62.3091	63.8587	66.1632	63.0171	66.4757	64.6917	56.1801	65.4443	65.6302	62.8303	61.323	66.1554	66.2249	66.917	66.4152	63.6121	64.3033	65.2392	65.2378	66.0732	65.8607	67.0694	66.6513	66.6277	64.2373	66.2091	66.8375	66.6324	67.2799	65.7277	67.065	67.4224	67.2861	68.0316	66.6532	67.4261	67.8984	67.7508	67.6475	66.3367	65.6344	68.4046	67.6136	68.0736
2515.18	66.9798	66.3529	68.0766	66.9869	66.4513	62.4775	64.0252	66.3203	63.1658	66.6297	64.8581	56.3678	65.6022	65.7908	62.9907	61.4761	66.3121	66.3816	67.0721	66.5734	63.7785	64.4724	65.3928	65.397	66.2364	66.0209	67.2286	66.8052	66.7767	64.3881	66.3702	66.9992	66.7898	67.4391	65.8869	67.2228	67.5783	67.4423	68.189	66.8023	67.5817	68.0551	67.9075	67.7994	66.4933	65.7821	68.5549	67.7601	68.2198
2517.1	67.1307	66.5114	68.223	67.1338	66.5993	62.6397	64.1847	66.4767	63.3158	66.7847	65.0202	56.5505	65.7586	65.948	63.1507	61.6295	66.465	66.536	67.2243	66.7255	63.9364	64.6368	65.5484	65.5578	66.3925	66.1777	67.3831	66.9601	66.927	64.5374	66.5268	67.1534	66.9537	67.5909	66.0407	67.3741	67.7282	67.5926	68.3325	66.9542	67.7341	68.2058	68.059	67.9494	66.647	65.9247	68.7042	67.9112	68.365
2519.03	67.2833	66.6763	68.3737	67.2921	66.7512	62.8117	64.354	66.6347	63.475	66.9427	65.1847	56.7364	65.9159	66.1034	63.3158	61.789	66.6216	66.6964	67.3788	66.883	64.1032	64.8057	65.7158	65.7204	66.5567	66.3369	67.5385	67.1216	67.095	64.6876	66.6849	67.3109	67.1181	67.7511	66.1998	67.5308	67.8818	67.745	68.4911	67.1145	67.8901	68.3611	68.2166	68.1043	66.8094	66.0793	68.8581	68.0629	68.5175
2520.96	67.4368	66.8337	68.5201	67.4501	66.9055	62.9779	64.5162	66.785	63.6322	67.0949	65.3503	56.925	66.0672	66.2576	63.4792	61.9497	66.7762	66.8533	67.5318	67.0383	64.2728	64.9693	65.8792	65.8748	66.7061	66.4886	67.6881	67.2755	67.2577	64.8379	66.8432	67.4696	67.2693	67.9075	66.357	67.6862	68.0373	67.8948	68.652	67.2685	68.0474	68.5119	68.3708	68.254	66.9648	66.2347	69.005	68.2079	68.6629
2522.89	67.5938	66.9886	68.6749	67.6028	67.0639	63.1434	64.6778	66.9417	63.7975	67.2495	65.5172	57.1138	66.2255	66.4176	63.6458	62.1137	66.9348	67.0118	67.6881	67.1957	64.451	65.1354	66.0409	66.0338	66.8612	66.6499	67.8448	67.4326	67.4057	64.9932	67.0066	67.6338	67.4285	68.0712	66.5186	67.843	68.1994	68.0523	68.8077	67.4302	68.2118	68.665	68.5301	68.4093	67.1249	66.3896	69.1565	68.3599	68.8124
2524.82	67.7363	67.1335	68.8228	67.7527	67.2082	63.3031	64.8329	67.0905	63.9504	67.3979	65.6732	57.2924	66.3751	66.5655	63.8028	62.2702	67.0837	67.1597	67.8376	67.3494	64.6146	65.2928	66.1907	66.1854	67.0052	66.8025	67.9908	67.5767	67.5405	65.1377	67.1535	67.7839	67.582	68.2227	66.6648	67.9868	68.3472	68.202	68.9486	67.5809	68.3654	68.8103	68.6754	68.5586	67.2784	66.5331	69.3035	68.5058	68.9537
2526.75	67.8808	67.2876	68.9653	67.9054	67.3599	63.4654	64.9871	67.242	64.0995	67.5487	65.8372	57.4762	66.5256	66.7161	63.9621	62.4224	67.2335	67.3064	67.9876	67.5043	64.7717	65.4539	66.3421	66.3375	67.1559	66.9515	68.135	67.725	67.6923	65.2827	67.3024	67.9344	67.7354	68.375	66.807	68.1343	68.4937	68.3512	69.0954	67.7276	68.5167	68.9596	68.8216	68.7056	67.4291	66.6776	69.4496	68.6496	69.0963
2528.68	68.0197	67.4395	69.0989	68.0412	67.5077	63.621	65.1363	67.3847	64.2433	67.6932	65.9944	57.6536	66.6664	66.8618	64.1125	62.5605	67.375	67.448	68.1315	67.6461	64.9267	65.6096	66.4856	66.4863	67.3048	67.0956	68.2818	67.8699	67.8387	65.4121	67.4484	68.0803	67.8824	68.5228	66.9464	68.2744	68.6347	68.4904	69.2377	67.8694	68.6649	69.0965	68.9638	68.8385	67.5709	66.8136	69.5904	68.7897	69.2282
2530.61	68.161	67.5858	69.238	68.183	67.6459	63.7819	65.2905	67.526	64.3845	67.8388	66.1477	57.8252	66.806	67.0052	64.2627	62.6995	67.5199	67.5936	68.2768	67.7875	65.0892	65.7629	66.6323	66.6412	67.4533	67.242	68.4295	68.0164	67.9816	65.5443	67.6034	68.2329	68.0339	68.6701	67.0944	68.4181	68.7756	68.6264	69.3832	68.0116	68.814	69.2388	69.1063	68.9802	67.7182	66.9497	69.7309	68.9276	69.3682
2532.54	68.2969	67.7257	69.3709	68.323	67.7732	63.9339	65.4365	67.6623	64.5149	67.9749	66.2938	57.9899	66.9441	67.1434	64.4046	62.8343	67.6541	67.729	68.4147	67.9261	65.2373	65.9067	66.7746	66.7899	67.601	67.3823	68.5667	68.1539	68.1144	65.6752	67.7496	68.3787	68.1758	68.8086	67.2321	68.5568	68.9101	68.7602	69.5202	68.1419	68.9522	69.3796	69.2433	69.1177	67.8573	67.0798	69.8607	69.0546	69.5051
2534.46	68.4383	67.873	69.509	68.4609	67.9111	64.0904	65.5893	67.8058	64.6558	68.1172	66.4437	58.1595	67.0913	67.2902	64.5499	62.9762	67.7971	67.8716	68.553	68.0684	65.3912	66.0581	66.9209	66.9372	67.7563	67.5298	68.708	68.2948	68.2542	65.8122	67.8969	68.5265	68.3223	68.9553	67.3768	68.6986	69.0498	68.8995	69.6634	68.2819	69.0953	69.5217	69.3842	69.2541	67.9991	67.2145	69.9989	69.1906	69.6453
2536.39	68.5771	68.0069	69.6406	68.5977	68.0492	64.2406	65.7398	67.9439	64.7962	68.2553	66.5912	58.3282	67.2314	67.4304	64.6924	63.1131	67.939	68.0147	68.6914	68.2048	65.5436	66.2077	67.0585	67.0742	67.8979	67.6729	68.8489	68.4333	68.3944	65.947	68.0342	68.6625	68.4634	69.1007	67.5127	68.8318	69.1821	69.0314	69.7974	68.4185	69.2338	69.6526	69.5225	69.3872	68.139	67.3474	70.1334	69.3235	69.7772
2538.32	68.7178	68.1465	69.778	68.746	68.1946	64.3907	65.8879	68.0892	64.9415	68.3956	66.7443	58.5007	67.3733	67.5742	64.8442	63.2551	68.0792	68.1569	68.8354	68.3478	65.6942	66.3673	67.2025	67.2187	68.0436	67.8189	68.9934	68.5774	68.5395	66.0866	68.1789	68.8105	68.6111	69.2512	67.6558	68.9747	69.3244	69.1719	69.9424	68.5593	69.3789	69.7892	69.6665	69.5286	68.2835	67.4896	70.2714	69.4636	69.9113
2540.25	68.8516	68.2845	69.9117	68.8881	68.3307	64.5375	66.0282	68.2242	65.0794	68.5326	66.8914	58.6675	67.5086	67.7126	64.9873	63.3948	68.2123	68.2893	68.9734	68.4884	65.8412	66.5144	67.3455	67.3576	68.1849	67.9556	69.1271	68.7119	68.6734	66.22	68.3195	68.9521	68.7459	69.387	67.7926	69.1091	69.4601	69.3038	70.0761	68.701	69.5192	69.9218	69.8014	69.665	68.4184	67.6248	70.4044	69.5964	70.0413
2542.18	68.9817	68.4234	70.047	69.0222	68.4678	64.6884	66.175	68.3573	65.2215	68.675	67.0403	58.835	67.6451	67.8488	65.1301	63.5375	68.351	68.4267	69.1097	68.6254	65.9931	66.664	67.4886	67.4957	68.3221	68.0906	69.2622	68.8486	68.8144	66.3538	68.4602	69.0915	68.8855	69.5266	67.9294	69.2444	69.5967	69.4373	70.2063	68.8462	69.6606	70.0592	69.9371	69.7977	68.5587	67.7604	70.5386	69.7315	70.1746
2544.11	69.1066	68.5551	70.1705	69.1508	68.5946	64.8311	66.3141	68.4864	65.3573	68.8087	67.1788	58.9938	67.7762	67.9793	65.266	63.671	68.4829	68.5604	69.2392	68.7556	66.1382	66.8035	67.6222	67.6274	68.4525	68.2221	69.3911	68.9809	68.9478	66.4734	68.5925	69.2255	69.0238	69.658	68.0637	69.373	69.7273	69.5621	70.3391	68.9747	69.7905	70.1886	70.0661	69.9246	68.6958	67.8886	70.6616	69.8576	70.2995
2546.04	69.2368	68.6852	70.2958	69.2777	68.7173	64.9745	66.4486	68.617	65.4861	68.9406	67.318	59.1536	67.907	68.1128	65.4028	63.8026	68.6129	68.6927	69.3701	68.8859	66.2803	66.9353	67.7552	67.757	68.5881	68.3543	69.5263	69.1149	69.0707	66.59	68.7274	69.3641	69.159	69.7882	68.1986	69.5028	69.8578	69.6866	70.4713	69.1026	69.9254	70.3166	70.1946	70.0553	68.8287	68.0138	70.7855	69.9833	70.4207
2547.97	69.3583	68.8154	70.415	69.3929	68.8369	65.1056	66.5725	68.7361	65.6056	69.0596	67.4481	59.3064	68.0276	68.2361	65.5322	63.925	68.7301	68.8108	69.4908	69.0075	66.4105	67.0658	67.8794	67.8788	68.7007	68.4771	69.6501	69.2381	69.1862	66.7052	68.8518	69.4859	69.277	69.9092	68.3123	69.6196	69.9716	69.8039	70.588	69.2171	70.0519	70.4395	70.3133	70.1733	68.9469	68.125	70.9028	70.0975	70.5329
2549.89	69.4787	68.9429	70.535	69.5256	68.9589	65.2408	66.7034	68.8632	65.727	69.1811	67.5783	59.4543	68.1502	68.3622	65.6572	64.0448	68.8479	68.9302	69.6109	69.1291	66.552	67.2056	68.0035	68.0048	68.8182	68.6052	69.7676	69.359	69.3071	66.8232	68.9825	69.6097	69.4029	70.0425	68.4294	69.7402	70.0898	69.9275	70.7081	69.3284	70.1797	70.5607	70.4379	70.2907	69.0711	68.241	71.0201	70.2113	70.6504
2551.82	69.5933	69.055	70.646	69.6488	69.0728	65.376	66.8375	68.9851	65.8451	69.3009	67.7042	59.599	68.2702	68.4842	65.7751	64.1581	68.9665	69.0467	69.7288	69.2505	66.6849	67.3311	68.1181	68.1281	68.9461	68.7282	69.8871	69.4743	69.4173	66.9338	69.105	69.7283	69.5261	70.1697	68.5473	69.8587	70.2101	70.0467	70.8228	69.4389	70.2979	70.6762	70.5558	70.4052	69.1901	68.3532	71.1345	70.3231	70.7659
2553.75	69.7119	69.18	70.7657	69.7604	69.1959	65.5104	66.9697	69.1097	65.9697	69.4226	67.8315	59.746	68.3949	68.6085	65.9043	64.2792	69.0968	69.1781	69.8515	69.3754	66.8158	67.462	68.2425	68.255	69.071	68.8501	70.0128	69.5971	69.5369	67.0485	69.2266	69.8521	69.6485	70.2912	68.6752	69.9844	70.3273	70.1654	70.9493	69.5583	70.4218	70.7921	70.6738	70.53	69.3141	68.4741	71.2607	70.442	70.8873
2555.68	69.8241	69.3079	70.8828	69.8745	69.3114	65.6346	67.09	69.2223	66.0902	69.5432	67.9527	59.8867	68.5101	68.7219	66.0275	64.3954	69.2171	69.3023	69.9673	69.491	66.9392	67.5898	68.3635	68.374	69.1926	68.9656	70.1304	69.7181	69.6631	67.1614	69.3458	69.9725	69.7653	70.4052	68.7888	70.0968	70.4395	70.2792	71.0682	69.6699	70.5417	70.9056	70.7877	70.6432	69.4326	68.5863	71.3766	70.558	71.0032
2557.61	69.9401	69.4319	70.9975	70.0008	69.425	65.7663	67.2183	69.3384	66.2156	69.6647	68.0807	60.032	68.6311	68.8421	66.1536	64.5174	69.337	69.4208	70.0864	69.6127	67.0724	67.7156	68.493	68.4979	69.3316	69.0858	70.2495	69.84	69.784	67.2816	69.4677	70.0972	69.8895	70.5286	68.9104	70.2118	70.5626	70.3995	71.1885	69.7891	70.6653	71.0285	70.9096	70.7595	69.5537	68.7013	71.4842	70.6724	71.1192
2559.54	70.0486	69.5458	71.106	70.1166	69.5352	65.8901	67.3377	69.4498	66.3354	69.7763	68.1996	60.1747	68.7425	68.9552	66.2756	64.6361	69.447	69.5283	70.1978	69.7254	67.2005	67.8368	68.616	68.6098	69.4511	69.2018	70.3609	69.9526	69.8934	67.3926	69.5841	70.2166	70.0045	70.643	69.0234	70.3183	70.6762	70.5115	71.2981	69.9008	70.7834	71.1389	71.0211	70.87	69.669	68.813	71.5907	70.7808	71.2265
2561.47	70.1613	69.6607	71.2177	70.2333	69.649	66.0153	67.4566	69.5608	66.4555	69.8912	68.3162	60.3116	68.8502	69.0648	66.3927	64.7502	69.5562	69.6376	70.3102	69.8338	67.3281	67.9642	68.7351	68.7269	69.5627	69.3188	70.4741	70.0633	70.0102	67.4988	69.698	70.335	70.116	70.7571	69.1329	70.4273	70.7843	70.6193	71.4092	70.01	70.8956	71.2503	71.1294	70.9847	69.7835	68.9241	71.7055	70.893	71.3315
2563.4	70.2629	69.7635	71.319	70.3394	69.7496	66.1291	67.5659	69.661	66.5607	69.995	68.4267	60.442	68.9569	69.1725	66.4973	64.8519	69.6582	69.7417	70.4124	69.9319	67.4451	68.0747	68.8385	68.8367	69.6646	69.4239	70.5796	70.1647	70.1128	67.5952	69.8027	70.4406	70.2204	70.8642	69.2365	70.5316	70.8775	70.7159	71.5106	70.1036	71.002	71.3561	71.2316	71.0888	69.8843	69.0214	71.805	70.992	71.4274
2565.33	70.3648	69.8606	71.4189	70.4379	69.8529	66.247	67.6751	69.7692	66.6606	70.0956	68.5345	60.57	69.064	69.2799	66.6062	64.9555	69.7633	69.849	70.5161	70.0377	67.5575	68.1848	68.9433	68.9375	69.7688	69.5288	70.682	70.2691	70.2111	67.6909	69.911	70.5454	70.3311	70.9727	69.3389	70.6367	70.9769	70.8183	71.6149	70.1973	71.1129	71.4589	71.3388	71.1901	69.9853	69.117	71.9032	71.0906	71.5231
2567.25	70.4554	69.9597	71.5054	70.5302	69.944	66.356	67.7771	69.8668	66.7523	70.1851	68.6281	60.6827	69.1582	69.376	66.7042	65.0472	69.8509	69.9379	70.6106	70.1368	67.6641	68.2869	69.0385	69.0343	69.8643	69.6263	70.7774	70.3603	70.2998	67.7741	70.0081	70.6424	70.4284	71.0703	69.4261	70.727	71.0734	70.9148	71.71	70.2838	71.2058	71.5499	71.4352	71.2837	70.0819	69.2049	71.994	71.1811	71.612
2569.18	70.5528	70.0666	71.5991	70.6269	70.0381	66.461	67.8763	69.961	66.8483	70.2795	68.7267	60.7983	69.2555	69.473	66.7977	65.135	69.9466	70.0312	70.707	70.2379	67.7682	68.3918	69.1352	69.1357	69.9573	69.7228	70.8736	70.4538	70.3936	67.8646	70.1086	70.7428	70.531	71.1687	69.5177	70.8242	71.1716	71.0108	71.8061	70.3738	71.3022	71.6457	71.5279	71.3803	70.1835	69.2964	72.0909	71.2713	71.7042
2571.11	70.6408	70.1573	71.6926	70.7152	70.1264	66.5615	67.9726	70.0469	66.9362	70.3718	68.8234	60.9122	69.3454	69.5628	66.8893	65.2217	70.0433	70.1262	70.7946	70.3237	67.8636	68.4953	69.2261	69.2243	70.0384	69.8129	70.9658	70.5458	70.4812	67.9521	70.2041	70.8382	70.6231	71.261	69.6089	70.9165	71.2559	71.0961	71.8945	70.4605	71.3996	71.7368	71.6161	71.4672	70.2753	69.3831	72.1767	71.3521	71.7917
2573.04	70.7255	70.2546	71.7898	70.8038	70.2163	66.6695	68.0774	70.1428	67.0307	70.4687	68.9207	61.0236	69.436	69.6538	66.9873	65.317	70.1344	70.2216	70.8822	70.4104	67.9701	68.6	69.3239	69.3231	70.1323	69.9081	71.0625	70.6439	70.5756	68.0412	70.3027	70.9414	70.7144	71.3598	69.7117	71.0103	71.3469	71.1866	71.9889	70.5554	71.4944	71.8365	71.7087	71.5576	70.3648	69.4702	72.2651	71.4409	71.8812
2574.97	70.8111	70.3413	71.8741	70.8904	70.2961	66.7678	68.1697	70.235	67.1214	70.5557	69.0111	61.1321	69.5204	69.7405	67.0785	65.4043	70.224	70.3119	70.9693	70.5	68.0656	68.6945	69.4198	69.4162	70.2345	69.9956	71.149	70.7346	70.6645	68.127	70.3901	71.0364	70.804	71.4453	69.7992	71.0933	71.4334	71.2716	72.0771	70.6376	71.5816	71.9251	71.7941	71.6471	70.4492	69.5511	72.3459	71.5255	71.9666
2576.9	70.898	70.4276	71.956	70.9887	70.3859	66.8684	68.2631	70.3276	67.2189	70.6463	69.1076	61.2473	69.613	69.8348	67.173	65.496	70.3159	70.4045	71.0638	70.5944	68.1636	68.7917	69.5152	69.5096	70.3264	70.0866	71.2363	70.824	70.7464	68.2147	70.4863	71.1316	70.8983	71.536	69.8902	71.1854	71.5196	71.3602	72.1657	70.725	71.6749	72.0144	71.8833	71.7436	70.5406	69.6414	72.4342	71.6197	72.0541
2578.83	70.9757	70.5063	72.0349	71.0738	70.4692	66.9607	68.3503	70.4094	67.3095	70.7299	69.1911	61.3494	69.6976	69.9208	67.2617	65.5828	70.3974	70.4844	71.1456	70.6726	68.2552	68.8778	69.5987	69.5895	70.4055	70.1683	71.3145	70.9028	70.8235	68.2923	70.5716	71.2131	70.9839	71.6251	69.9772	71.2706	71.5946	71.4383	72.2426	70.8059	71.7577	72.0983	71.9619	71.8258	70.6251	69.7275	72.5147	71.6992	72.1269
2580.76	71.0507	70.5878	72.1151	71.1519	70.5514	67.0523	68.4375	70.4871	67.3924	70.8074	69.27	61.4463	69.7736	69.9985	67.3453	65.6655	70.4755	70.5623	71.2264	70.7518	68.3503	68.9684	69.6849	69.6769	70.4991	70.2485	71.3962	70.9819	70.9103	68.3697	70.6487	71.2946	71.0633	71.7084	70.0556	71.3472	71.6739	71.5175	72.3154	70.876	71.8413	72.1792	72.0414	71.9039	70.7065	69.8066	72.5925	71.7719	72.2039
2582.68	71.1179	70.6645	72.1841	71.219	70.6188	67.1333	68.5131	70.5532	67.4589	70.8732	69.3416	61.5361	69.8406	70.0668	67.4173	65.7326	70.5426	70.6325	71.2981	70.8222	68.4254	69.0528	69.7527	69.7539	70.5773	70.3221	71.4686	71.05	70.9768	68.4315	70.7202	71.3711	71.1337	71.7755	70.1185	71.4119	71.7386	71.5833	72.3794	70.9387	71.9166	72.2468	72.113	71.9783	70.7779	69.8713	72.6613	71.8412	72.2684
2584.61	71.1885	70.7422	72.2529	71.2893	70.6878	67.2139	68.5883	70.6226	67.5291	70.9432	69.4164	61.6234	69.9142	70.1394	67.4887	65.7977	70.6159	70.7043	71.369	70.8909	68.5008	69.1338	69.8194	69.8254	70.6528	70.3971	71.5368	71.1168	71.0415	68.4911	70.7964	71.4452	71.2141	71.8481	70.1827	71.4826	71.8039	71.6478	72.458	71.0108	71.9901	72.3219	72.1853	72.0478	70.8491	69.9352	72.7318	71.9125	72.3351
2586.54	71.2456	70.8005	72.3122	71.3556	70.7487	67.2852	68.6551	70.6859	67.5909	71.0062	69.4863	61.7059	69.9748	70.2013	67.552	65.8558	70.6759	70.7628	71.4283	70.9524	68.5709	69.1941	69.8823	69.8879	70.7256	70.4594	71.5952	71.1766	71.1007	68.5477	70.8649	71.5063	71.2798	71.9143	70.2453	71.5494	71.8622	71.7064	72.5217	71.0656	72.0507	72.384	72.2472	72.1092	70.9119	69.9911	72.7902	71.9676	72.3941
2588.47	71.3059	70.8651	72.3724	71.4261	70.8075	67.3603	68.7261	70.7504	67.6543	71.0694	69.5552	61.7876	70.0368	70.2637	67.6197	65.9173	70.7404	70.8277	71.49	71.0162	68.6472	69.2565	69.9544	69.9581	70.7872	70.5222	71.6626	71.2457	71.1626	68.6094	70.9345	71.5721	71.344	71.9837	70.3128	71.6195	71.9263	71.772	72.5804	71.121	72.1173	72.4482	72.3084	72.1795	70.9793	70.05	72.8511	72.0263	72.4558
2590.4	71.3615	70.9237	72.4292	71.4849	70.8605	67.4272	68.7901	70.805	67.7109	71.1238	69.614	61.8609	70.0952	70.323	67.6761	65.9702	70.7989	70.8895	71.547	71.0739	68.7093	69.319	70.0193	70.0195	70.8372	70.5778	71.7259	71.3081	71.2238	68.665	70.9952	71.6301	71.4054	72.0382	70.3699	71.6747	71.989	71.8311	72.6376	71.1767	72.1778	72.5079	72.3632	72.2342	71.0365	70.1044	72.9032	72.0794	72.5095
2592.33	71.4196	70.983	72.4917	71.5391	70.9232	67.4932	68.8533	70.866	67.7712	71.1844	69.6776	61.9371	70.1535	70.3851	67.7385	66.0286	70.8582	70.9511	71.6029	71.1295	68.7757	69.3911	70.0849	70.0852	70.9017	70.6385	71.786	71.3677	71.288	68.724	71.0612	71.6936	71.4729	72.1036	70.4286	71.733	72.0511	71.894	72.6955	71.2358	72.2427	72.5744	72.4249	72.2943	71.0986	70.1661	72.9615	72.139	72.5666
2594.26	71.4735	71.0434	72.5464	71.5901	70.9795	67.5549	68.9113	70.9224	67.8285	71.2375	69.7357	62.0049	70.2035	70.4369	67.7976	66.0876	70.9094	71.0019	71.6533	71.179	68.84	69.4564	70.146	70.1457	70.9528	70.6925	71.8394	71.4206	71.3353	68.7794	71.1186	71.7519	71.5253	72.1658	70.4823	71.7878	72.0986	71.9445	72.7409	71.2876	72.3008	72.6326	72.4789	72.3504	71.1516	70.2201	73.0132	72.1953	72.6155
2596.19	71.5239	71.1019	72.5981	71.6473	71.0363	67.6131	68.9695	70.9767	67.8894	71.2951	69.7918	62.0694	70.2587	70.4904	67.8534	66.1474	70.959	71.0517	71.7109	71.2363	68.9048	69.5167	70.2046	70.2046	70.9998	70.7489	71.896	71.4721	71.3781	68.8329	71.1786	71.8086	71.5799	72.225	70.5405	71.8444	72.1518	71.998	72.793	71.3494	72.3573	72.6871	72.5325	72.4089	71.2051	70.2755	73.0627	72.2469	72.6681
2598.12	71.5648	71.145	72.6395	71.6938	71.079	67.6638	69.0165	71.0212	67.9372	71.3372	69.8397	62.1266	70.303	70.5342	67.9009	66.1935	71.0043	71.0941	71.7538	71.28	68.9539	69.5661	70.2439	70.2504	71.0442	70.7946	71.9405	71.5149	71.4282	68.8739	71.2239	71.8518	71.6305	72.2651	70.5824	71.8854	72.1981	72.0398	72.8379	71.3948	72.406	72.7315	72.5751	72.4514	71.2521	70.323	73.1074	72.2887	72.7087
2600.04	71.6082	71.1851	72.6829	71.7375	71.1187	67.715	69.0631	71.0674	67.9871	71.3764	69.8885	62.182	70.3474	70.5804	67.9501	66.2382	71.0475	71.1392	71.7952	71.3225	68.999	69.6197	70.2846	70.2925	71.0934	70.8411	71.9849	71.5612	71.481	68.9127	71.2717	71.8997	71.6756	72.3067	70.626	71.9291	72.248	72.0848	72.8814	71.433	72.4533	72.7781	72.615	72.494	71.2984	70.3649	73.1547	72.3324	72.7466
2601.97	71.6394	71.2176	72.7175	71.7751	71.1496	67.7559	69.1008	71.1019	68.0241	71.4116	69.9215	62.2251	70.3821	70.6152	67.9825	66.2675	71.0829	71.1742	71.8298	71.3566	69.0388	69.6582	70.3202	70.3282	71.1311	70.8732	72.012	71.5963	71.5155	68.9423	71.3092	71.9369	71.7064	72.3439	70.6626	71.9641	72.2846	72.1204	72.9125	71.466	72.4883	72.8158	72.6523	72.5255	71.3294	70.39	73.1828	72.3636	72.7799
2603.9	71.6711	71.2522	72.75	71.8128	71.1866	67.7964	69.1351	71.1339	68.0562	71.4463	69.9588	62.2673	70.4178	70.6494	68.0149	66.2979	71.1178	71.209	71.8651	71.3917	69.0806	69.6898	70.3597	70.3682	71.1791	70.9048	72.0414	71.6307	71.5471	68.9718	71.3448	71.9718	71.7427	72.38	70.6979	72.0005	72.3186	72.1535	72.9435	71.4998	72.5278	72.8522	72.6917	72.5553	71.3601	70.4164	73.2129	72.3941	72.8135
2605.83	71.6956	71.274	72.7719	71.834	71.2125	67.8274	69.1616	71.1588	68.0791	71.4669	69.9897	62.3033	70.4431	70.6733	68.0421	66.3232	71.1389	71.2342	71.8854	71.4142	69.1107	69.7185	70.392	70.3947	71.2161	70.9288	72.0724	71.6558	71.5742	68.9903	71.3694	71.9979	71.7704	72.4018	70.7216	72.0246	72.3387	72.1777	72.9657	71.5203	72.5597	72.8785	72.7157	72.584	71.3872	70.4357	73.24	72.4154	72.8352
2607.76	71.7216	71.3062	72.8042	71.8577	71.2353	67.8592	69.1931	71.1885	68.1076	71.4959	70.0226	62.3379	70.469	70.6974	68.0686	66.3456	71.1634	71.2616	71.9083	71.4376	69.1466	69.7544	70.4186	70.4295	71.2514	70.9592	72.1057	71.6819	71.6008	69.0141	71.4027	72.0316	71.8048	72.4426	70.748	72.0521	72.3647	72.2031	72.9957	71.5509	72.5837	72.9074	72.7415	72.6127	71.4143	70.4606	73.2646	72.4415	72.8632
2609.69	71.7393	71.3356	72.8262	71.8814	71.2566	67.8806	69.2142	71.2095	68.1305	71.5203	70.05	62.3652	70.4899	70.7192	68.0857	66.3638	71.1823	71.281	71.932	71.4595	69.1734	69.7816	70.4324	70.4551	71.2772	70.9834	72.1236	71.7039	71.6197	69.0332	71.4304	72.0603	71.8292	72.4723	70.7648	72.0712	72.3864	72.223	73.0167	71.5755	72.6055	72.9295	72.7651	72.6324	71.4341	70.4825	73.2837	72.4647	72.8841
2611.62	71.7616	71.364	72.8458	71.9095	71.2822	67.9088	69.2429	71.2358	68.1563	71.5433	70.0783	62.3932	70.5109	70.7414	68.1081	66.39	71.2061	71.3038	71.9592	71.4845	69.2039	69.8172	70.4657	70.4789	71.3012	71.0072	72.1417	71.7302	71.6468	69.0599	71.462	72.0902	71.8542	72.4942	70.79	72.0987	72.4134	72.2481	73.0417	71.5979	72.6386	72.9576	72.7914	72.6558	71.4581	70.51	73.3067	72.4913	72.9068
2613.55	71.7742	71.3799	72.8595	71.9259	71.2956	67.932	69.2635	71.253	68.1764	71.5576	70.0972	62.4148	70.5241	70.758	68.126	66.4096	71.2215	71.3195	71.9711	71.4983	69.221	69.8355	70.4918	70.4942	71.3169	71.0236	72.1583	71.7423	71.6545	69.0752	71.4843	72.1114	71.868	72.5014	70.809	72.1148	72.4293	72.2634	73.0598	71.6156	72.6569	72.9742	72.8067	72.6766	71.4751	70.5284	73.321	72.5081	72.9199
2615.47	71.7851	71.389	72.8735	71.9486	71.3092	67.9475	69.2761	71.2668	68.1954	71.5739	70.1178	62.4351	70.541	70.7768	68.1431	66.4301	71.2361	71.332	71.9821	71.5105	69.2366	69.8501	70.5123	70.51	71.3273	71.0391	72.1758	71.7525	71.6598	69.0828	71.4992	72.1294	71.8861	72.5203	70.8221	72.1255	72.4451	72.2772	73.0782	71.6353	72.6724	72.9883	72.8225	72.6972	71.4905	70.5434	73.3338	72.5218	72.9319
2617.4	71.7875	71.3878	72.8804	71.9529	71.3172	67.9519	69.2797	71.271	68.2043	71.581	70.1283	62.4458	70.545	70.7785	68.1508	66.4377	71.2345	71.3322	71.985	71.5173	69.2447	69.8588	70.5154	70.5123	71.3203	71.044	72.1797	71.7573	71.6668	69.0821	71.5006	72.1302	71.8963	72.5344	70.8272	72.1255	72.4455	72.2787	73.0822	71.6421	72.6835	72.9921	72.8265	72.6979	71.4945	70.5494	73.3324	72.5256	72.9388
2619.33	71.79	71.3909	72.8849	71.9501	71.3236	67.9636	69.2867	71.2751	68.2126	71.5869	70.1342	62.453	70.5456	70.7821	68.1566	66.4425	71.2427	71.344	71.9896	71.5247	69.2563	69.8663	70.5204	70.5147	71.3149	71.0449	72.1834	71.7638	71.6771	69.0871	71.5103	72.1301	71.9088	72.5376	70.8381	72.1334	72.4464	72.2816	73.0905	71.654	72.6957	72.9999	72.8324	72.7053	71.4996	70.5559	73.3371	72.5338	72.9415
2621.26	71.78	71.3919	72.8724	71.9435	71.3174	67.9622	69.282	71.2682	68.206	71.5807	70.1335	62.4509	70.5402	70.7799	68.1469	66.4317	71.2389	71.3384	71.9839	71.5172	69.2511	69.8625	70.5151	70.5098	71.3119	71.0342	72.1772	71.7558	71.6703	69.0794	71.509	72.1238	71.9027	72.5306	70.8322	72.1293	72.4445	72.2764	73.0875	71.6513	72.6908	72.9961	72.8242	72.701	71.4923	70.5453	73.3324	72.527	72.9324
2623.19	71.7715	71.3936	72.8647	71.9423	71.3081	67.9544	69.2753	71.2614	68.199	71.569	70.1307	62.4426	70.5323	70.7701	68.1359	66.4211	71.2288	71.3254	71.976	71.5082	69.2507	69.8587	70.5105	70.5085	71.3146	71.0254	72.1743	71.7454	71.6586	69.0716	71.5104	72.1265	71.8952	72.5309	70.8222	72.1227	72.4424	72.2729	73.0809	71.6466	72.6834	72.9934	72.8175	72.6901	71.4838	70.5355	73.3267	72.5186	72.9274
2625.12	71.7548	71.3749	72.8528	71.9337	71.2866	67.9391	69.2624	71.2443	68.1849	71.5533	70.1175	62.4258	70.5137	70.752	68.1221	66.4083	71.2177	71.3104	71.9565	71.4867	69.2462	69.8464	70.5	70.5004	71.2973	71.0122	72.1617	71.7303	71.6375	69.0543	71.5024	72.1189	71.8803	72.5155	70.8064	72.107	72.4296	72.2555	73.0698	71.6322	72.6714	72.9776	72.8098	72.6741	71.4712	70.5212	73.3106	72.5003	72.9156
2627.05	71.7473	71.3629	72.8465	71.9296	71.2767	67.9294	69.2544	71.2377	68.1791	71.5502	70.1125	62.4157	70.5019	70.7433	68.1132	66.3997	71.2048	71.2999	71.9434	71.4742	69.237	69.8425	70.4964	70.4969	71.2999	71.008	72.1502	71.7236	71.6291	69.0433	71.4967	72.1086	71.8737	72.5036	70.7986	72.1011	72.4217	72.2439	73.067	71.6239	72.6688	72.9699	72.8049	72.6705	71.4598	70.5081	73.3018	72.4903	72.9062
2628.98	71.736	71.3494	72.8304	71.9145	71.2685	67.9167	69.2422	71.2242	68.1705	71.5346	70.1024	62.3984	70.4824	70.7238	68.0929	66.3821	71.188	71.2841	71.9289	71.4593	69.2129	69.8286	70.4817	70.4792	71.3064	70.9944	72.1287	71.7077	71.6205	69.0278	71.4823	72.09	71.8606	72.4917	70.7903	72.0899	72.4063	72.2311	73.0568	71.6085	72.6571	72.9602	72.7832	72.6587	71.4405	70.4882	73.2841	72.4734	72.8832
2630.91	71.7198	71.3356	72.8176	71.898	71.2567	67.9014	69.2301	71.2092	68.1662	71.5201	70.0939	62.3821	70.47	70.7063	68.0719	66.3646	71.1698	71.2674	71.9184	71.4497	69.2009	69.815	70.4674	70.4687	71.2972	70.9776	72.1118	71.6892	71.6048	69.0146	71.4688	72.0766	71.8465	72.4838	70.7826	72.0785	72.3949	72.2211	73.0512	71.6041	72.6453	72.9443	72.7705	72.6446	71.4288	70.4774	73.2693	72.4616	72.8662
2632.83	71.6905	71.3092	72.7927	71.8741	71.2306	67.8702	69.2041	71.1821	68.1445	71.4967	70.0703	62.3566	70.4453	70.6817	68.0433	66.3415	71.1364	71.235	71.8914	71.4213	69.1855	69.7897	70.4482	70.4473	71.2714	70.948	72.0944	71.6597	71.5736	68.9874	71.4421	72.0508	71.8199	72.4565	70.7521	72.0487	72.3685	72.1947	73.0301	71.5877	72.6245	72.9175	72.7536	72.617	71.405	70.4574	73.2431	72.4364	72.839
2634.76	71.6625	71.282	72.7663	71.8505	71.2081	67.8443	69.1774	71.1551	68.1201	71.4741	70.0455	62.326	70.4135	70.6552	68.0205	66.3244	71.1081	71.2088	71.8657	71.3949	69.1634	69.768	70.4298	70.4222	71.2475	70.9183	72.0693	71.6324	71.5535	68.958	71.4198	72.0275	71.7928	72.4275	70.7282	72.0214	72.3405	72.1722	73.006	71.5674	72.6039	72.8962	72.7304	72.5947	71.3772	70.4341	73.222	72.4105	72.8131
2636.69	71.6229	71.2419	72.7305	71.8148	71.1722	67.807	69.1381	71.116	68.0878	71.4382	70.0112	62.281	70.3746	70.6165	67.9851	66.2879	71.0738	71.1739	71.8269	71.3563	69.1238	69.7318	70.392	70.385	71.2054	70.8811	72.0235	71.5923	71.5223	68.9207	71.3905	71.9933	71.76	72.3953	70.6916	71.9829	72.3053	72.1351	72.9684	71.5312	72.5678	72.8623	72.6885	72.5643	71.3391	70.3988	73.1872	72.3765	72.7782
2638.62	71.5877	71.2073	72.6975	71.7801	71.1372	67.7677	69.1015	71.078	68.0569	71.4062	69.978	62.2363	70.3416	70.584	67.9447	66.2472	71.0399	71.1349	71.7905	71.3189	69.0866	69.7005	70.3548	70.3503	71.1678	70.8421	71.9843	71.5568	71.4793	68.8826	71.3597	71.9625	71.7307	72.3645	70.661	71.9519	72.2712	72.0978	72.9351	71.492	72.5321	72.8298	72.6534	72.5294	71.3057	70.3666	73.1544	72.3475	72.7458
2640.55	71.5434	71.1686	72.6569	71.745	71.096	67.7213	69.057	71.0357	68.0154	71.3637	69.9331	62.1877	70.2975	70.544	67.8921	66.2003	70.9964	71.0913	71.7472	71.2742	69.0441	69.6596	70.3098	70.3041	71.1195	70.7973	71.9467	71.511	71.4272	68.8373	71.314	71.9213	71.6876	72.3182	70.6259	71.9131	72.2251	72.0554	72.8928	71.4452	72.4961	72.7923	72.608	72.4878	71.2635	70.3251	73.1116	72.3071	72.7067
2642.48	71.5028	71.1248	72.6145	71.7066	71.0521	67.6759	69.0111	70.9929	67.9761	71.3198	69.8872	62.1343	70.254	70.4998	67.8399	66.1546	70.9543	71.0496	71.6997	71.227	69.0056	69.6132	70.2693	70.259	71.0671	70.7553	71.9086	71.4659	71.3889	68.7939	71.2708	71.8822	71.6427	72.2686	70.5838	71.8709	72.1824	72.0169	72.8564	71.406	72.4586	72.7496	72.5677	72.4482	71.2223	70.2812	73.0676	72.2618	72.6667
2644.41	71.453	71.0725	72.5613	71.6462	70.9972	67.6178	68.9587	70.938	67.922	71.2668	69.8378	62.0718	70.1972	70.4418	67.7866	66.1017	70.9016	70.9983	71.6448	71.1698	68.9533	69.561	70.2179	70.2151	71.0158	70.7005	71.8542	71.4164	71.341	68.7414	71.2187	71.8289	71.5912	72.2161	70.5278	71.8169	72.1293	71.9671	72.8056	71.3575	72.4136	72.6989	72.524	72.4015	71.1696	70.2276	73.0138	72.2097	72.6183
2646.34	71.4019	71.0239	72.514	71.5958	70.9543	67.5629	68.9143	70.8863	67.8698	71.2182	69.7878	62.0099	70.144	70.3906	67.7368	66.0521	70.8465	70.9449	71.5964	71.1222	68.8977	69.5151	70.1699	70.1771	70.975	70.6512	71.7983	71.3692	71.2855	68.6954	71.1723	71.7812	71.5449	72.1755	70.4829	71.7698	72.0839	71.9201	72.7575	71.3137	72.371	72.655	72.4773	72.3544	71.1169	70.1808	72.9654	72.1638	72.5707
2648.26	71.3364	70.9682	72.4634	71.544	70.8981	67.4986	68.8558	70.8277	67.8217	71.1602	69.7313	61.9427	70.087	70.3323	67.6745	65.9946	70.7854	70.8852	71.5421	71.072	68.8395	69.4581	70.1175	70.1174	70.9173	70.5943	71.7408	71.3056	71.227	68.6401	71.1178	71.7295	71.4852	72.1198	70.4238	71.7111	72.0287	71.8661	72.698	71.2602	72.3175	72.6008	72.4216	72.2991	71.0555	70.1255	72.9109	72.1083	72.5088
2650.19	71.2798	70.9095	72.4099	71.4902	70.8405	67.4367	68.7949	70.7732	67.7791	71.1076	69.6721	61.873	70.0316	70.2753	67.6147	65.9415	70.7272	70.8254	71.4856	71.0174	68.783	69.4009	70.0628	70.0553	70.8603	70.5337	71.6893	71.2437	71.1766	68.5805	71.066	71.6788	71.4255	72.0621	70.3689	71.654	71.9654	71.8051	72.6356	71.2035	72.2644	72.5435	72.3696	72.2506	70.9963	70.0715	72.8581	72.0534	72.4528
2652.12	71.2153	70.8356	72.3406	71.4335	70.777	67.364	68.7247	70.709	67.7172	71.0461	69.6036	61.7971	69.9657	70.2111	67.5438	65.8783	70.6531	70.7506	71.414	70.9443	68.7135	69.3284	69.999	69.9854	70.8087	70.4639	71.6225	71.1752	71.1086	68.5138	71.0045	71.6162	71.3569	71.9968	70.304	71.5858	71.9002	71.7362	72.5628	71.1374	72.2047	72.4797	72.3039	72.1867	70.929	70.0092	72.7897	71.9906	72.3871
2654.05	71.1458	70.7641	72.2748	71.367	70.7132	67.2902	68.6555	70.6413	67.6512	70.9782	69.5361	61.7198	69.8953	70.1396	67.4749	65.8138	70.5836	70.6841	71.3439	70.874	68.6462	69.2529	69.941	69.9187	70.7504	70.3936	71.5518	71.1048	71.0375	68.4463	70.9354	71.5432	71.294	71.9303	70.2435	71.5216	71.8413	71.6762	72.501	71.0764	72.1423	72.42	72.2367	72.124	70.8599	69.9432	72.7267	71.9315	72.3202
2655.98	71.0691	70.6892	72.2008	71.2831	70.6382	67.2079	68.576	70.5612	67.5776	70.8972	69.4559	61.6258	69.8119	70.0565	67.3933	65.7367	70.5097	70.6096	71.2653	70.7954	68.5691	69.1746	69.8605	69.8371	70.6693	70.3143	71.4717	71.0261	70.9604	68.3664	70.8581	71.4584	71.2142	71.8478	70.1699	71.4463	71.7596	71.5977	72.4282	70.9977	72.0609	72.3472	72.1675	72.0549	70.7773	69.866	72.6511	71.8556	72.2448
2657.91	70.9915	70.6142	72.1278	71.2083	70.5643	67.1222	68.4963	70.4807	67.5028	70.8229	69.3726	61.5298	69.7295	69.9756	67.3064	65.6526	70.4354	70.5355	71.1892	70.7185	68.4909	69.0947	69.7792	69.761	70.5982	70.239	71.3938	70.9478	70.8808	68.2855	70.7847	71.3852	71.1389	71.7728	70.0922	71.3693	71.6793	71.5187	72.346	70.9235	71.9839	72.2776	72.0982	71.9772	70.7008	69.7944	72.5769	71.7806	72.1718
2659.84	70.9013	70.5194	72.0462	71.1306	70.4787	67.0232	68.4045	70.3914	67.4178	70.74	69.282	61.4261	69.6424	69.8877	67.2091	65.5629	70.3439	70.4438	71.1044	70.6309	68.3958	69.0111	69.69	69.6781	70.5073	70.1504	71.3065	70.8573	70.7887	68.1964	70.6988	71.3033	71.0516	71.6841	70.0026	71.2776	71.5963	71.4333	72.2603	70.8434	71.8992	72.1976	72.0042	71.8898	70.6176	69.7128	72.4957	71.6985	72.0879
2661.77	70.8167	70.4318	71.963	71.0445	70.3919	66.9302	68.3168	70.3052	67.3376	70.6554	69.1931	61.3213	69.5548	69.7987	67.1163	65.4773	70.2547	70.3524	71.022	70.5438	68.3088	68.9318	69.6057	69.5965	70.4155	70.0654	71.2218	70.7717	70.7078	68.1106	70.6173	71.2198	70.9642	71.6017	69.9229	71.1944	71.5108	71.3489	72.1738	70.7593	71.8153	72.1189	71.92	71.8149	70.5358	69.6317	72.4111	71.6198	72.0013
2663.69	70.7229	70.3389	71.8688	70.9525	70.2992	66.8283	68.2219	70.2134	67.2492	70.5605	69.0948	61.2073	69.459	69.7011	67.0174	65.3802	70.1554	70.2564	70.9276	70.4479	68.2186	68.8315	69.5138	69.502	70.3166	69.9707	71.1313	70.6809	70.6158	68.0215	70.526	71.1238	70.8705	71.5054	69.8331	71.109	71.4183	71.2567	72.0716	70.6615	71.7262	72.0279	71.8361	71.7277	70.4411	69.5405	72.3181	71.5341	71.9158
2665.62	70.6312	70.2492	71.7782	70.8712	70.215	66.7276	68.1275	70.1238	67.1573	70.4687	69.0024	61.0969	69.3679	69.6114	66.9213	65.2877	70.0633	70.1618	70.834	70.3529	68.1197	68.7331	69.4219	69.4122	70.2119	69.8793	71.0433	70.59	70.522	67.939	70.4377	71.0325	70.7778	71.4099	69.7436	71.0253	71.3325	71.1704	71.9831	70.5726	71.6475	71.9369	71.7482	71.6392	70.3477	69.4494	72.2284	71.4406	71.8315
2667.55	70.5301	70.1521	71.6818	70.77	70.1195	66.6186	68.0243	70.0155	67.0596	70.3689	68.8986	60.9796	69.2658	69.512	66.8135	65.1889	69.9602	70.0579	70.7296	70.2462	68.0052	68.6293	69.3239	69.3077	70.1123	69.7775	70.9466	70.4831	70.4156	67.8436	70.3394	70.9331	70.6786	71.3157	69.6442	70.9265	71.2307	71.0747	71.8814	70.4744	71.5548	71.8407	71.6455	71.5445	70.2466	69.3535	72.1282	71.3401	71.7326
2669.48	70.4298	70.0462	71.5862	70.6717	70.0151	66.5065	67.9212	69.9113	66.9664	70.2688	68.7873	60.8551	69.1662	69.4119	66.7086	65.0893	69.856	69.9552	70.6257	70.1436	67.9021	68.5296	69.2271	69.2047	70.0165	69.6712	70.8419	70.3771	70.3172	67.7465	70.2396	70.8311	70.5751	71.2108	69.5488	70.8304	71.13	70.9756	71.7802	70.3795	71.4563	71.7484	71.5512	71.4527	70.1416	69.2569	72.0291	71.2467	71.6335
2671.41	70.3155	69.9298	71.4785	70.565	69.9022	66.381	67.8019	69.799	66.8582	70.1583	68.6645	60.7155	69.0524	69.2995	66.5884	64.9758	69.7392	69.8386	70.5107	70.0307	67.7862	68.414	69.107	69.0915	69.9088	69.5575	70.7205	70.2624	70.208	67.6313	70.1291	70.7191	70.4583	71.0914	69.4356	70.7164	71.0185	70.8612	71.6674	70.2785	71.3417	71.6353	71.4452	71.3416	70.022	69.1426	71.9208	71.1391	71.5208
2673.34	70.2073	69.8237	71.3692	70.4468	69.7934	66.2572	67.6813	69.6832	66.7478	70.0472	68.5453	60.5763	68.9325	69.1823	66.4626	64.8601	69.6268	69.7251	70.3963	69.9176	67.6663	68.2978	68.9925	68.9787	69.8016	69.4421	70.6015	70.1481	70.0903	67.5184	70.0159	70.6068	70.3463	70.9823	69.3198	70.6009	70.9085	70.7524	71.557	70.164	71.2286	71.5256	71.3327	71.2356	69.9078	69.036	71.8148	71.0324	71.4089
2675.27	70.0826	69.7001	71.2467	70.3183	69.6683	66.1223	67.5527	69.5576	66.6263	69.9201	68.4133	60.4263	68.8012	69.0505	66.332	64.7357	69.501	69.5983	70.2649	69.7848	67.5327	68.1703	68.8749	68.852	69.6823	69.3131	70.4729	70.0174	69.9575	67.3946	69.8939	70.4871	70.2193	70.8628	69.199	70.4793	70.7905	70.6346	71.4296	70.0342	71.1079	71.4077	71.2044	71.1197	69.7815	68.9171	71.6949	70.9116	71.2867
2677.2	69.9513	69.567	71.1233	70.2027	69.5423	65.9864	67.4235	69.43	66.503	69.7897	68.2815	60.2745	68.6722	68.9189	66.2012	64.6086	69.3688	69.4663	70.1338	69.6501	67.4016	68.0441	68.751	68.7253	69.5655	69.1769	70.3453	69.8881	69.8287	67.2703	69.7705	70.3669	70.0915	70.7347	69.0797	70.3588	70.6683	70.514	71.3046	69.9131	70.9825	71.2881	71.079	70.999	69.6517	68.791	71.5673	70.7825	71.1597
2679.13	69.8189	69.4254	70.998	70.0728	69.418	65.8445	67.2879	69.2983	66.3719	69.6571	68.1467	60.1196	68.5378	68.7853	66.0562	64.4717	69.2368	69.3341	70.0034	69.5164	67.2667	67.9059	68.6173	68.5933	69.4346	69.0366	70.2143	69.7564	69.7058	67.1405	69.6358	70.2302	69.962	70.5962	68.9482	70.2303	70.5349	70.3847	71.1765	69.7826	70.8543	71.1673	70.9544	70.8755	69.5164	68.6597	71.4365	70.6521	71.0293
2681.05	69.6962	69.2969	70.8825	69.9414	69.2953	65.7071	67.157	69.176	66.2495	69.5373	68.0193	59.968	68.4106	68.6599	65.9191	64.3401	69.1175	69.2141	69.8812	69.394	67.1383	67.7692	68.4912	68.4649	69.3014	68.9134	70.0971	69.6351	69.5877	67.0192	69.5139	70.1076	69.8364	70.469	68.8226	70.1063	70.4146	70.2622	71.0512	69.6602	70.7384	71.0477	70.8359	70.76	69.3918	68.539	71.3179	70.5387	70.9141
2682.98	69.5674	69.1695	70.7568	69.8162	69.1647	65.567	67.0226	69.0445	66.1218	69.4106	67.8846	59.8083	68.2781	68.5258	65.7813	64.208	68.9853	69.0803	69.7509	69.2632	66.9967	67.6275	68.3557	68.3292	69.1628	68.7863	69.9722	69.5026	69.4454	66.8956	69.3855	69.9798	69.6996	70.3375	68.6921	69.9765	70.2922	70.1318	70.9239	69.5366	70.6155	70.9232	70.7054	70.6379	69.2657	68.4183	71.1925	70.4177	70.7882
2684.91	69.4358	69.039	70.6254	69.6827	69.032	65.423	66.8836	68.9083	65.9911	69.278	67.745	59.6443	68.1411	68.3894	65.6412	64.0734	68.8466	68.9399	69.6125	69.122	66.855	67.489	68.2208	68.2039	69.026	68.6524	69.8343	69.3603	69.3005	66.7646	69.2477	69.847	69.566	70.2044	68.562	69.8453	70.1644	69.9993	70.7974	69.408	70.4872	70.7967	70.572	70.5103	69.1286	68.2887	71.0623	70.2864	70.657
2686.84	69.2913	68.8921	70.4836	69.5378	68.8897	65.262	66.7303	68.7612	65.851	69.1296	67.593	59.4687	67.9963	68.246	65.4881	63.9257	68.6966	68.7921	69.4621	68.9697	66.7002	67.3356	68.0752	68.0659	68.8805	68.5044	69.6805	69.2089	69.1607	66.6213	69.097	69.699	69.4205	70.0584	68.4173	69.7003	70.0161	69.8506	70.6525	69.2667	70.3445	70.6504	70.4296	70.3747	68.9741	68.1436	70.9218	70.1447	70.5213
2688.77	69.1408	68.7452	70.3433	69.4085	68.7503	65.1012	66.5769	68.6136	65.7106	68.9804	67.4403	59.2922	67.8501	68.0969	65.3339	63.7827	68.5468	68.6428	69.3155	68.8236	66.5417	67.1813	67.9358	67.9188	68.7246	68.3553	69.5288	69.0613	69.0167	66.4806	68.9521	69.5508	69.2676	69.9119	68.2747	69.5575	69.8731	69.7078	70.5061	69.1274	70.2017	70.5085	70.2875	70.2342	68.8259	68.0047	70.777	70.0062	70.383
2690.7	68.9785	68.5866	70.1955	69.2585	68.5969	64.929	66.4129	68.4561	65.5555	68.8218	67.2773	59.1057	67.6888	67.9338	65.1666	63.6294	68.3886	68.4856	69.1627	68.672	66.3758	67.024	67.781	67.7583	68.5617	68.1948	69.37	68.9039	68.861	66.3245	68.7977	69.3914	69.1045	69.7542	68.1197	69.4053	69.7193	69.5562	70.3515	68.9704	70.0475	70.3622	70.1329	70.0818	68.6705	67.8572	70.6195	69.8561	70.2328
2692.63	68.8273	68.4268	70.0435	69.0913	68.4379	64.7603	66.2484	68.2957	65.3988	68.6674	67.1154	58.9161	67.5307	67.7775	64.9927	63.4655	68.2309	68.326	69.0059	68.5149	66.2133	66.8584	67.6209	67.5948	68.4116	68.0337	69.2154	68.7435	68.7066	66.166	68.6404	69.2336	68.9482	69.5922	67.9645	69.2518	69.567	69.4044	70.197	68.8149	69.8928	70.2118	69.9792	69.9324	68.5124	67.7077	70.4696	69.7078	70.0769
2694.56	68.6623	68.256	69.8755	68.9237	68.2707	64.5779	66.0709	68.123	65.232	68.5015	66.9408	58.7132	67.3579	67.6056	64.8116	63.2907	68.0588	68.1538	68.8331	68.3404	66.0389	66.6799	67.4537	67.4245	68.2395	67.8652	69.048	68.5742	68.5357	65.9992	68.4701	69.0666	68.7792	69.4176	67.7985	69.084	69.4002	69.2395	70.0319	68.6507	69.7273	70.0553	69.816	69.7672	68.3418	67.5479	70.3064	69.5421	69.9071
2696.48	68.489	68.0832	69.7086	68.7653	68.1094	64.3933	65.8963	67.952	65.065	68.3338	66.7671	58.5094	67.183	67.4314	64.6342	63.1214	67.8898	67.9833	68.6587	68.1646	65.8611	66.5079	67.2836	67.2558	68.0707	67.6921	68.8756	68.4068	68.3611	65.8335	68.3006	68.8968	68.6117	69.2533	67.6317	68.92	69.2307	69.0732	69.8737	68.4858	69.5619	69.8929	69.6496	69.6044	68.1721	67.3857	70.1353	69.3761	69.7389
2698.41	68.3083	67.8981	69.5348	68.5832	67.9337	64.2018	65.714	67.7725	64.8883	68.1542	66.5866	58.2992	67.0019	67.2493	64.4468	62.9427	67.7129	67.8042	68.4772	67.9803	65.6669	66.319	67.1001	67.0766	67.8995	67.5083	68.6959	68.2275	68.186	65.6643	68.1164	68.7116	68.4346	69.0775	67.4544	68.7434	69.0549	68.898	69.695	68.3133	69.388	69.7202	69.4748	69.4313	67.9912	67.2121	69.9617	69.2056	69.569
2700.34	68.1379	67.7198	69.3683	68.4119	67.7553	64.012	65.5271	67.5964	64.716	67.9788	66.4053	58.086	66.8234	67.0697	64.2612	62.7658	67.532	67.6248	68.3005	67.8044	65.4801	66.1403	66.9179	66.9014	67.7364	67.3317	68.5268	68.0479	68.0085	65.4955	67.9436	68.5364	68.2652	68.9025	67.2786	68.5667	68.8814	68.7291	69.5241	68.1448	69.2194	69.5482	69.3025	69.2624	67.8136	67.0415	69.7958	69.0396	69.4032
2702.27	67.954	67.532	69.1936	68.2374	67.5731	63.8148	65.3345	67.4071	64.5377	67.7966	66.2142	57.8661	66.6367	66.8847	64.0615	62.5751	67.3459	67.437	68.117	67.6204	65.2825	65.9512	66.7286	66.7202	67.5582	67.1446	68.3418	67.8595	67.8149	65.3145	67.7607	68.3523	68.0783	68.7139	67.0924	68.3857	68.7001	68.5496	69.3437	67.9618	69.0358	69.3682	69.1226	69.0819	67.6293	66.8646	69.6124	68.8571	69.2226
2704.2	67.763	67.3456	69.0148	68.0463	67.3938	63.6164	65.1459	67.2185	64.3602	67.6133	66.0233	57.6455	66.4473	66.6986	63.86	62.3858	67.1637	67.252	67.9306	67.4295	65.0894	65.7551	66.5462	66.5393	67.3683	66.9576	68.1526	67.675	67.6279	65.1409	67.5774	68.1717	67.8896	68.5293	66.9186	68.2114	68.5232	68.3664	69.1577	67.783	68.8504	69.1981	68.9414	68.9064	67.4449	66.6925	69.4301	68.675	69.0461
2706.13	67.5611	67.1517	68.8245	67.8497	67.206	63.4061	64.9439	67.0219	64.17	67.4185	65.8214	57.4129	66.2443	66.4947	63.6559	62.1951	66.9683	67.0529	67.7338	67.2265	64.8877	65.5479	66.3528	66.3338	67.1674	66.7589	67.9534	67.4789	67.4399	64.9543	67.3781	67.9778	67.6917	68.3336	66.7232	68.0175	68.3318	68.1728	68.9656	67.5955	68.6612	69.0071	68.749	68.7208	67.2497	66.5065	69.2412	68.486	68.8579
2708.06	67.3657	66.9523	68.6308	67.6628	67.016	63.1939	64.738	66.8238	63.9773	67.2225	65.6182	57.1768	66.0477	66.2945	63.4465	61.995	66.767	66.8558	67.5339	67.0265	64.6803	65.3445	66.1547	66.1316	66.965	66.5578	67.7558	67.281	67.2526	64.7646	67.1786	67.7819	67.4942	68.1315	66.5231	67.8214	68.1339	67.9785	68.7733	67.4078	68.4736	68.8157	68.5585	68.5311	67.0511	66.3155	69.0549	68.3035	68.667
2709.99	67.1612	66.7478	68.4326	67.4529	66.8103	62.974	64.524	66.6186	63.7714	67.0157	65.4074	56.9331	65.8403	66.0886	63.2224	61.7815	66.5555	66.6506	67.3284	66.8179	64.4572	65.1274	65.9523	65.9288	66.7516	66.3471	67.5546	67.072	67.0491	64.5622	66.9727	67.5715	67.2836	67.9183	66.3213	67.6166	67.9322	67.7785	68.5711	67.2059	68.2682	68.6174	68.357	68.3283	66.839	66.1146	68.8588	68.1111	68.4661
2711.92	66.9566	66.5455	68.2378	67.2483	66.6059	62.7567	64.3147	66.4125	63.5693	66.8128	65.1975	56.6889	65.6329	65.8838	63.0058	61.5754	66.3439	66.4401	67.1224	66.6145	64.2402	64.914	65.7505	65.7223	66.5313	66.1375	67.3514	66.8644	66.8426	64.3579	66.7641	67.3594	67.0754	67.713	66.1151	67.4114	67.7373	67.5856	68.3677	67.0058	68.0664	68.4165	68.1615	68.1276	66.6299	65.9167	68.6595	67.9126	68.2671
2713.84	66.7414	66.3233	68.0262	67.0494	66.3959	62.5192	64.0875	66.1915	63.3571	66.598	64.9721	56.4301	65.4129	65.6628	62.7784	61.3571	66.1242	66.2197	66.9022	66.3973	64.0147	64.6861	65.5263	65.4998	66.3044	65.9171	67.1285	66.6449	66.6197	64.1466	66.5411	67.1409	66.8529	67.4915	65.893	67.1957	67.5221	67.3706	68.1489	66.7941	67.8542	68.2061	67.9488	67.9188	66.409	65.7082	68.448	67.7003	68.0581
2715.77	66.5241	66.0999	67.8162	66.8333	66.184	62.2816	63.8574	65.9713	63.1412	66.3811	64.745	56.1682	65.1911	65.4373	62.5477	61.1394	65.9106	65.9995	66.6841	66.1761	63.7826	64.457	65.3069	65.2797	66.0929	65.6921	66.9056	66.421	66.4056	63.9352	66.3181	66.9225	66.6307	67.2727	65.6747	66.9804	67.3102	67.1554	67.9302	66.5837	67.6425	67.9954	67.734	67.7082	66.1906	65.497	68.236	67.4886	67.8456
2717.7	66.2931	65.8649	67.5941	66.5952	65.955	62.0402	63.6214	65.7403	62.914	66.1507	64.5097	55.8985	64.9624	65.2063	62.3085	60.9121	65.6808	65.7686	66.4531	65.9417	63.5333	64.2202	65.0781	65.0449	65.8652	65.4599	66.675	66.1899	66.1845	63.7113	66.0891	66.6956	66.4034	67.046	65.4504	66.7553	67.0841	66.9335	67.7037	66.3608	67.4222	67.7727	67.508	67.4861	65.9638	65.279	68.0114	67.2671	67.6262
2719.63	66.0592	65.6273	67.366	66.3762	65.7249	61.7954	63.3796	65.5037	62.686	65.9224	64.2743	55.627	64.7278	64.971	62.0638	60.6765	65.4444	65.5343	66.2166	65.7047	63.2885	63.9812	64.8456	64.8067	65.6382	65.2275	66.444	65.9574	65.9418	63.4867	65.8578	66.4636	66.1732	66.8125	65.2306	66.5286	66.8516	66.7061	67.4792	66.1386	67.1893	67.5516	67.281	67.2615	65.7281	65.0572	67.785	67.0441	67.3997
2721.56	65.8172	65.3844	67.129	66.1322	65.4841	61.5362	63.1263	65.2578	62.448	65.6803	64.0261	55.3428	64.4793	64.7238	61.8058	60.4289	65.1942	65.2804	65.9688	65.4576	63.037	63.7281	64.6034	64.561	65.4058	64.9808	66.2002	65.7101	65.6862	63.2512	65.6062	66.2187	65.9249	66.5651	64.9921	66.2898	66.6118	66.4691	67.2379	65.9075	66.9438	67.3156	67.0412	67.0265	65.4797	64.8191	67.5436	66.8044	67.1586
2723.49	65.5797	65.1411	66.8964	65.8863	65.2493	61.2796	62.8762	65.0183	62.2175	65.4408	63.7791	55.0599	64.2328	64.478	61.5526	60.1887	64.9507	65.0337	65.7255	65.2157	62.7882	63.4793	64.3633	64.3266	65.1732	64.7356	65.9585	65.4713	65.4511	63.0168	65.3623	65.9771	65.6791	66.3205	64.7483	66.0519	66.3738	66.2353	67.0008	65.6783	66.7093	67.0796	66.806	66.7927	65.2371	64.5888	67.307	66.5722	66.924
2725.42	65.3319	64.8871	66.6563	65.6526	65.003	61.0124	62.6162	64.7718	61.9742	65.1944	63.521	54.7679	63.9807	64.2246	61.2908	59.9409	64.7011	64.7852	65.4714	64.9616	62.5292	63.2192	64.1128	64.0723	64.9203	64.4778	65.7115	65.2183	65.205	62.7748	65.1162	65.7254	65.4255	66.0681	64.4988	65.8022	66.1298	65.9913	66.7535	65.4336	66.4647	66.8411	66.5651	66.5498	64.9861	64.3497	67.0642	66.3376	66.6829
2727.35	65.0956	64.6476	66.4246	65.4211	64.7681	60.7568	62.3696	64.5337	61.7387	64.9584	63.2756	54.4843	63.7405	63.9838	61.0426	59.7022	64.4636	64.5461	65.2359	64.7208	62.2699	62.9667	63.8729	63.8301	64.6753	64.235	65.4736	64.9741	64.9679	62.5393	64.8734	65.4824	65.181	65.8251	64.2671	65.5648	65.8975	65.7547	66.5215	65.2042	66.2291	66.6105	66.3326	66.3215	64.7471	64.1227	66.8358	66.109	66.4557
2729.27	64.8457	64.397	66.1809	65.1597	64.5266	60.491	62.1129	64.2824	61.4977	64.7128	63.0225	54.1934	63.4893	63.7325	60.7834	59.4548	64.2132	64.2938	64.9876	64.4683	62.0008	62.7038	63.6222	63.5848	64.4125	63.9853	65.2242	64.7226	64.7307	62.297	64.6212	65.2324	64.9251	65.5689	64.0229	65.3197	65.645	65.5061	66.2743	64.9655	65.986	66.3679	66.0868	66.0791	64.4955	63.8842	66.5987	65.8703	66.2174
2731.2	64.5871	64.136	65.9316	64.912	64.2791	60.2125	61.8425	64.0235	61.2456	64.459	62.757	53.8909	63.2288	63.47	60.5094	59.1971	63.9536	64.0361	64.7314	64.2116	61.7324	62.437	63.3644	63.3234	64.1491	63.7246	64.9568	64.4613	64.4727	62.0484	64.3695	64.9755	64.6692	65.311	63.7703	65.0697	65.3832	65.2522	66.019	64.7146	65.7317	66.1194	65.8342	65.8257	64.2372	63.6368	66.3512	65.6229	65.9716
2733.13	64.3153	63.8586	65.6668	64.6559	64.0148	59.9218	61.5595	63.752	60.9781	64.1879	62.4757	53.5728	62.9558	63.1958	60.2252	58.9279	63.6791	63.7594	64.4569	63.9393	61.4535	62.1545	63.0942	63.047	63.8834	63.4517	64.6817	64.1895	64.1904	61.7859	64.097	64.6991	64.3987	65.045	63.502	64.7997	65.1224	64.9897	65.7517	64.453	65.4625	65.8572	65.5689	65.5638	63.9641	63.3776	66.0861	65.361	65.7063
2735.06	64.0449	63.5865	65.3977	64.375	63.7449	59.6365	61.2807	63.4766	60.7092	63.9129	62.1913	53.2518	62.6794	62.9202	59.9389	58.6558	63.4018	63.4823	64.1838	63.6655	61.1694	61.877	62.8224	62.7752	63.6027	63.175	64.4127	63.9149	63.9183	61.5197	63.8209	64.4211	64.1247	64.7694	63.2368	64.5317	64.8646	64.7285	65.481	64.1871	65.1986	65.5907	65.3009	65.3018	63.6864	63.113	65.8181	65.0978	65.4376
2736.99	63.7667	63.3055	65.1259	64.1039	63.4661	59.3416	60.9935	63.195	60.4337	63.633	61.9008	52.9244	62.3923	62.6363	59.6408	58.3709	63.1169	63.2018	63.9013	63.3814	60.8711	61.5854	62.5394	62.4965	63.3156	62.889	64.1345	63.6307	63.6449	61.2487	63.5393	64.1404	63.8416	64.4804	62.9572	64.2574	64.5864	64.4543	65.2088	63.9102	64.9212	65.3141	65.0264	65.0291	63.4035	62.8413	65.5416	64.8248	65.1622
2738.92	63.4898	63.0265	64.8645	63.8398	63.1982	59.048	60.7078	62.9154	60.1683	63.3606	61.6178	52.6013	62.1164	62.3607	59.3546	58.097	62.844	62.9276	63.6228	63.1002	60.5741	61.2963	62.2636	62.2228	63.0464	62.6085	63.8629	63.3535	63.3581	60.9828	63.264	63.8655	63.5626	64.2015	62.6794	63.9837	64.312	64.1809	64.9406	63.646	64.6498	65.0485	64.757	64.7631	63.1275	62.5789	65.276	64.5584	64.8991
2740.85	63.1992	62.7358	64.5886	63.5424	62.9191	58.7415	60.4125	62.6239	59.8892	63.0748	61.3229	52.2701	61.8291	62.0732	59.0527	57.8123	62.5564	62.6342	63.3362	62.81	60.2674	60.9949	61.9731	61.9266	62.7577	62.3173	63.5773	63.064	63.0654	60.7057	62.972	63.5737	63.2716	63.9171	62.3999	63.6996	64.0294	63.9004	64.6559	63.3671	64.3701	64.7719	64.4752	64.4841	62.8352	62.2996	64.9974	64.2814	64.6269
2742.78	62.9105	62.4382	64.3024	63.2548	62.6308	58.4311	60.1131	62.3298	59.6024	62.7866	61.0181	51.9308	61.5346	61.7799	58.7445	57.5207	62.2607	62.335	63.0406	62.5137	59.9631	60.6934	61.6791	61.6297	62.4658	62.0235	63.2846	62.7712	62.7882	60.4237	62.6784	63.2867	62.9771	63.6278	62.1194	63.4146	63.7436	63.6187	64.3679	63.0836	64.0845	64.4901	64.1891	64.2046	62.5392	62.0157	64.714	64.0022	64.3439
2744.71	62.6099	62.1257	64.0042	62.963	62.3228	58.102	59.7959	62.0256	59.3063	62.4816	60.6983	51.576	61.2249	61.4667	58.4262	57.2159	61.9473	62.0219	62.7319	62.2018	59.6455	60.3771	61.3741	61.3253	62.1657	61.7148	62.9732	62.4622	62.4814	60.1262	62.3716	62.9851	62.6725	63.3193	61.8151	63.1142	63.4445	63.3202	64.0595	62.7873	63.7804	64.1927	63.8829	63.9112	62.2286	61.7199	64.415	63.706	64.043
2746.63	62.3004	61.8153	63.7032	62.6489	62.0199	57.7753	59.4755	61.7206	59.0097	62.1732	60.3794	51.2204	60.9121	61.1517	58.1007	56.9051	61.6326	61.7084	62.428	61.8919	59.3198	60.0559	61.0669	61.0176	61.8567	61.4015	62.6588	62.1463	62.1637	59.8288	62.058	62.6742	62.3578	63.0031	61.507	62.8105	63.1444	63.0213	63.7539	62.4919	63.4777	63.891	63.575	63.6115	61.9161	61.4243	64.1112	63.4067	63.7448
2748.56	61.987	61.5026	63.3989	62.3338	61.7194	57.4475	59.1556	61.4058	58.7005	61.864	60.0612	50.8621	60.5964	60.837	57.7728	56.5953	61.3206	61.3968	62.1177	61.5781	58.9848	59.7224	60.7571	60.7123	61.5522	61.0843	62.3483	61.8309	61.8608	59.5252	61.7417	62.3555	62.0361	62.6815	61.2041	62.5013	62.8371	62.7126	63.4503	62.1881	63.1671	63.5858	63.2713	63.3058	61.6009	61.1272	63.8046	63.103	63.446
2750.49	61.6827	61.1986	63.1032	62.0455	61.4189	57.1207	58.8382	61.0963	58.3991	61.563	59.7463	50.5095	60.2887	60.531	57.4518	56.2892	61.0157	61.0919	61.8107	61.2706	58.6638	59.3992	60.4567	60.4089	61.2449	60.7756	62.046	61.5257	61.5657	59.2274	61.4352	62.0431	61.7285	62.3751	60.902	62.1987	62.5378	62.4129	63.1544	61.8887	62.8592	63.2928	62.9765	63.0111	61.2967	60.8336	63.5112	62.8121	63.154
2752.42	61.3661	60.8707	62.796	61.7304	61.1034	56.7854	58.5098	60.7785	58.0906	61.2467	59.4178	50.1451	59.9705	60.2111	57.121	55.97	60.6956	60.771	61.4887	60.9499	58.334	59.0763	60.1342	60.0776	60.9126	60.4541	61.7296	61.208	61.2472	58.918	61.1134	61.7223	61.4134	62.0576	60.5818	61.8841	62.2183	62.0999	62.8442	61.5773	62.5455	62.9863	62.6629	62.7031	60.9802	60.5269	63.2064	62.513	62.8483
2754.35	61.0408	60.5358	62.4802	61.4023	60.7881	56.4437	58.1786	60.4571	57.7705	60.9222	59.0865	49.7715	59.6458	59.8802	56.7847	55.6484	60.3665	60.4418	61.1614	60.6243	57.993	58.7397	59.8041	59.7459	60.5857	60.1268	61.4059	60.8806	60.9231	58.6035	60.7837	61.3995	61.0882	61.7313	60.2646	61.5666	61.8955	61.7828	62.5243	61.2616	62.2285	62.6686	62.3422	62.3887	60.6553	60.2163	62.8882	62.1984	62.5344
2756.28	60.7113	60.1992	62.1514	61.0799	60.4593	56.0898	57.8343	60.1236	57.4389	60.5856	58.7426	49.3888	59.3051	59.5367	56.4374	55.3155	60.0332	60.1072	60.8236	60.2826	57.6383	58.389	59.4706	59.4058	60.2406	59.7855	61.0718	60.5423	60.5918	58.2819	60.4444	61.0645	60.7404	61.3908	59.9329	61.2331	61.5707	61.4558	62.1846	60.9375	61.8997	62.3416	62.0135	62.0665	60.3165	59.8931	62.5614	61.8706	62.2019
2758.21	60.3823	59.8726	61.8296	60.7524	60.1339	55.738	57.4914	59.7869	57.1183	60.2528	58.398	49.009	58.9657	59.2006	56.0908	54.982	59.6988	59.7738	60.486	59.9415	57.2912	58.0464	59.1374	59.0713	59.8998	59.4487	60.7333	60.2061	60.2528	57.9595	60.1091	60.7277	60.3989	61.0494	59.5979	60.8989	61.2432	61.1248	61.853	60.6137	61.5689	62.0231	61.6897	61.7449	59.9775	59.5725	62.2361	61.5492	61.8798
2760.14	60.0364	59.5331	61.4943	60.4066	59.7978	55.3739	57.1359	59.4399	56.7867	59.9148	58.0413	48.6176	58.6197	58.8541	55.7336	54.6432	59.354	59.4245	60.1442	59.5958	56.9327	57.6875	58.7884	58.725	59.5563	59.1028	60.3819	59.8596	59.9121	57.6258	59.7628	60.3771	60.0539	60.6993	59.2566	60.5576	60.9054	60.7872	61.5128	60.277	61.2284	61.6877	61.3521	61.4104	59.631	59.2431	61.8986	61.2149	61.5479
2762.06	59.6915	59.1756	61.1584	60.074	59.4581	55.006	56.7806	59.0952	56.4479	59.5741	57.6868	48.2256	58.2748	58.5073	55.3739	54.299	59.0019	59.0753	59.8028	59.2484	56.5688	57.3261	58.4405	58.379	59.2155	58.753	60.0375	59.5099	59.5776	57.293	59.4132	60.028	59.711	60.3536	58.9198	60.2192	60.5694	60.4522	61.1732	59.9446	60.8883	61.3484	61.0146	61.0726	59.286	58.9108	61.5608	60.8835	61.2082
2763.99	59.337	58.8065	60.8129	59.7202	59.1063	54.629	56.4152	58.7377	56.0974	59.2167	57.3181	47.8205	57.9163	58.1485	55.0051	53.943	58.6373	58.7128	59.4446	58.8902	56.1905	56.9613	58.0846	58.0199	58.8599	58.3913	59.6829	59.1488	59.2139	56.9461	59.0543	59.6723	59.3505	59.9959	58.5694	59.8654	60.2172	60.0987	60.8205	59.5958	60.536	60.9982	60.663	60.7282	58.9276	58.5677	61.2119	60.5366	60.8614
2765.92	58.9832	58.4554	60.4643	59.3539	58.7579	54.2556	56.0469	58.3764	55.7477	58.8577	56.9491	47.4137	57.5587	57.7895	54.6346	53.5921	58.2839	58.3535	59.0837	58.5328	55.8121	56.5946	57.7247	57.6665	58.5002	58.0301	59.3246	58.7896	58.8492	56.6008	58.6976	59.3151	58.9843	59.6365	58.213	59.5129	59.8679	59.7425	60.4632	59.2448	60.1837	60.6498	60.3074	60.3824	58.5674	58.2229	60.8659	60.1908	60.5114
2767.85	58.6177	58.0904	60.1022	58.9941	58.3927	53.8635	55.6651	58.0031	55.3847	58.487	56.5719	46.9977	57.189	57.4177	54.2489	53.2282	57.9115	57.9806	58.7111	58.1577	55.4232	56.2103	57.352	57.2981	58.1321	57.6592	58.9592	58.4161	58.4816	56.2412	58.3248	58.9425	58.6082	59.2608	57.8442	59.1453	59.5067	59.3807	60.0985	58.8819	59.8163	60.2832	59.944	60.0211	58.192	57.8639	60.5074	59.8371	60.149
2769.78	58.2475	57.7085	59.7394	58.633	58.0251	53.4749	55.2835	57.6324	55.0209	58.117	56.1885	46.5766	56.8109	57.0409	53.8639	52.8607	57.5351	57.6041	58.3386	57.781	55.0413	55.8203	56.9832	56.9187	57.7586	57.2841	58.5871	58.0404	58.1097	55.8778	57.9487	58.5646	58.2343	58.8861	57.4837	58.7743	59.1407	59.0228	59.7311	58.5209	59.4449	59.9186	59.5814	59.6613	57.8138	57.5052	60.1434	59.4772	59.7861
2771.71	57.8619	57.3042	59.3575	58.2376	57.6413	53.0704	54.887	57.2442	54.6467	57.7313	55.7865	46.1456	56.4202	56.653	53.4644	52.4775	57.1464	57.2151	57.9478	57.3924	54.6415	55.4121	56.5909	56.5253	57.3735	56.8907	58.1956	57.6487	57.7243	55.5033	57.5603	58.1746	57.8475	58.4985	57.1019	58.3917	58.7586	58.6415	59.3444	58.1424	59.0546	59.5465	59.1987	59.2792	57.4234	57.1315	59.7587	59.0971	59.4131
2773.64	57.4759	56.9125	58.9793	57.8573	57.2617	52.66	54.4896	56.856	54.2697	57.3469	55.3877	45.7153	56.0327	56.2632	53.0687	52.0979	56.7574	56.8246	57.5641	57.0055	54.2389	55.0122	56.2017	56.1377	56.9838	56.5	57.8014	57.2556	57.3432	55.1325	57.1767	57.7908	57.4552	58.1042	56.7108	58.0099	58.3786	58.2596	58.9614	57.7656	58.6701	59.1692	58.8122	58.9008	57.0359	56.7614	59.3785	58.7176	59.0402
2775.57	57.0906	56.539	58.6085	57.4869	56.8844	52.2521	54.0921	56.4715	53.8889	56.9678	54.9951	45.2847	55.6484	55.8764	52.6738	51.7201	56.3666	56.4342	57.1807	56.6202	53.8393	54.619	55.8172	55.7489	56.5892	56.1109	57.4113	56.8693	56.9528	54.7656	56.7889	57.403	57.0645	57.7106	56.3262	57.6271	57.9943	57.8783	58.5799	57.3914	58.2875	58.7906	58.4289	58.5309	56.6495	56.3911	59.0065	58.3459	58.6653
2777.5	56.7161	56.1683	58.2413	57.1097	56.5123	51.8545	53.7037	56.0937	53.5166	56.5913	54.608	44.8567	55.2653	55.4923	52.2792	51.3426	55.9866	56.0557	56.797	56.2358	53.4425	54.2224	55.4376	55.3638	56.2081	55.7237	57.0296	56.4892	56.5699	54.3967	56.403	57.0183	56.6814	57.3214	55.9528	57.2504	57.6177	57.505	58.1988	57.0162	57.9147	58.4188	58.0567	58.1657	56.2643	56.0209	58.6327	57.9765	58.2923
2779.42	56.3207	55.7612	57.8524	56.7091	56.1159	51.4371	53.2985	55.695	53.1311	56.1917	54.1987	44.4131	54.8645	55.0882	51.8659	50.9471	55.5899	55.6559	56.3922	55.8291	53.0192	53.8089	55.0379	54.9617	55.8065	55.3209	56.6302	56.0888	56.1901	54.0098	55.9997	56.6114	56.2753	56.9136	55.5618	56.8587	57.2264	57.1123	57.8008	56.6208	57.5186	58.0303	57.6629	57.7712	55.8649	55.638	58.2378	57.588	57.9032
2781.35	55.9182	55.3369	57.4575	56.3095	55.7192	51.0117	52.885	55.2899	52.7395	55.7908	53.7834	43.965	54.4592	54.6817	51.4491	50.5507	55.1868	55.253	55.9878	55.4233	52.5987	53.3912	54.6332	54.5582	55.3977	54.9189	56.23	55.6863	55.796	53.6196	55.5992	56.2085	55.8635	56.5083	55.1615	56.4605	56.8233	56.7129	57.4019	56.2307	57.1182	57.6357	57.2636	57.3781	55.4618	55.248	57.8456	57.1978	57.5171
2783.28	55.5062	54.917	57.05	55.8951	55.3185	50.5773	52.4565	54.8727	52.3305	55.3799	53.3598	43.51	54.0434	54.2662	51.0228	50.1415	54.7712	54.8381	55.572	55.0083	52.171	52.9563	54.2138	54.1412	54.9807	54.5007	55.8155	55.2693	55.364	53.2209	55.1844	55.794	55.444	56.0939	54.7539	56.0494	56.4128	56.3065	56.9916	55.8276	56.7064	57.2266	56.8538	56.9782	55.046	54.8502	57.4407	56.794	57.1144
2785.21	55.0905	54.5135	56.6414	55.4769	54.9111	50.1427	52.0275	54.4534	51.9209	54.9646	52.9302	43.0487	53.6267	53.8491	50.5915	49.7263	54.3514	54.4149	55.1492	54.5862	51.7334	52.523	53.792	53.7278	54.5619	54.075	55.3989	54.8474	54.9391	52.8206	54.7665	55.3733	55.0254	55.6707	54.3467	55.6366	56.006	55.9022	56.5757	55.417	56.2938	56.816	56.4422	56.5691	54.6251	54.4487	57.028	56.39	56.7034
2787.14	54.6579	54.0782	56.2163	55.0534	54.4808	49.6889	51.5855	54.0144	51.4952	54.5288	52.4841	42.5705	53.1889	53.4094	50.1455	49.2975	53.9148	53.9751	54.7101	54.1454	51.2817	52.078	53.3604	53.2988	54.1252	53.6345	54.9664	54.4074	54.5119	52.3981	54.3275	54.9323	54.5866	55.2224	53.9109	55.2032	55.5735	55.4758	56.1336	54.9875	55.8637	56.3856	56.0101	56.1398	54.1841	54.0218	56.5946	55.9646	56.2685
2789.07	54.2288	53.634	55.7941	54.629	54.0535	49.2364	51.1453	53.581	51.0727	54.0971	52.0464	42.1021	52.7597	52.9747	49.702	48.8743	53.4812	53.5407	54.2825	53.7157	50.8386	51.6361	52.9344	52.8628	53.6912	53.1998	54.5298	53.9733	54.0818	51.9833	53.8906	54.4971	54.1501	54.7835	53.4773	54.7764	55.1487	55.0521	55.7092	54.5675	55.4369	55.9646	55.5799	55.7192	53.7519	53.606	56.1748	55.5453	55.8483
2791	53.8027	53.1931	55.3702	54.1986	53.6325	48.7861	50.7017	53.1514	50.6505	53.6691	51.6085	41.6355	52.3291	52.5426	49.2566	48.4479	53.0462	53.1099	53.8546	53.2849	50.3953	51.1966	52.5037	52.4266	53.2524	52.7686	54.0905	53.5406	53.6498	51.5702	53.4571	54.0644	53.7136	54.3507	53.0569	54.3505	54.7279	54.6291	55.2839	54.1476	55.0021	55.5443	55.1549	55.2999	53.3212	53.1936	55.7576	55.1286	55.4326
2792.93	53.3777	52.7635	54.9507	53.7752	53.2133	48.3371	50.2615	52.7187	50.2281	53.2414	51.168	41.1656	51.8956	52.1096	48.8151	48.0226	52.618	52.6777	53.4241	52.8517	49.9458	50.7512	52.0702	51.9956	52.8229	52.3362	53.6548	53.1052	53.2334	51.1509	53.0221	53.631	53.2819	53.9203	52.6383	53.9239	54.3015	54.2023	54.8527	53.7253	54.5649	55.1218	54.7342	54.8781	52.8858	52.7774	55.3328	54.707	55.0127
2794.85	52.933	52.3207	54.5118	53.3275	52.7664	47.8699	49.8073	52.2684	49.7914	52.7946	50.7098	40.6814	51.4482	51.6608	48.3585	47.5829	52.1661	52.2244	52.9754	52.3997	49.4758	50.2822	51.6135	51.5448	52.3761	51.8827	53.2071	52.6535	52.7872	50.7137	52.5711	53.1773	52.8253	53.4617	52.1889	53.4772	53.8552	53.7572	54.4133	53.2911	54.1145	54.6803	54.291	54.439	52.4333	52.3438	54.8878	54.2696	54.5771
2796.78	52.4848	51.8627	54.0683	52.872	52.3197	47.4016	49.3455	51.8173	49.3517	52.346	50.2461	40.1954	50.995	51.2041	47.9002	47.144	51.7131	51.7703	52.5221	51.9455	49.0045	49.8193	51.16	51.0868	51.9201	51.4272	52.7579	52.1992	52.3302	50.2793	52.1184	52.7198	52.3642	53.0016	51.7403	53.029	53.4106	53.3111	53.9638	52.855	53.6677	54.2335	53.8381	53.994	51.9805	51.9056	54.4464	53.8334	54.1367
2798.71	52.0349	51.3973	53.624	52.4251	51.8747	46.9295	48.8803	51.3641	48.9086	51.8976	49.7845	39.7089	50.5381	50.7464	47.4379	46.7003	51.2586	51.3159	52.0643	51.4862	48.5331	49.3514	50.707	50.6271	51.4562	50.9721	52.3062	51.742	51.8823	49.8469	51.6596	52.2539	51.9057	52.547	51.2922	52.5777	52.9608	52.8603	53.5066	52.4055	53.2191	53.7847	53.3849	53.5475	51.5219	51.4689	54.0025	53.3929	53.6938
2800.64	51.5907	50.9443	53.187	51.9875	51.4339	46.464	48.4238	50.9172	48.4722	51.4529	49.3299	39.2275	50.089	50.2966	46.98	46.2577	50.8121	50.8674	51.6135	51.0337	48.069	48.8883	50.2551	50.1823	51.0048	50.5202	51.8593	51.2896	51.4356	49.4156	51.2077	51.7966	51.4524	52.094	50.8448	52.1325	52.5153	52.4164	53.0573	51.9632	52.7735	53.3487	52.9412	53.1132	51.0697	51.0364	53.56	52.9542	53.2557
2802.57	51.1289	50.4873	52.7279	51.5194	50.9759	45.9826	47.9507	50.452	48.0194	50.9893	48.8556	38.728	49.6273	49.8312	46.5064	45.7986	50.345	50.3981	51.1472	50.5669	47.5882	48.406	49.7893	49.7161	50.5371	50.049	51.3938	50.8205	50.958	48.9654	50.7379	51.3241	50.9808	51.6173	50.3816	51.6703	52.055	51.9595	52.5939	51.5074	52.3102	52.8876	52.4801	52.656	50.6025	50.5834	53.0976	52.494	52.796
2804.5	50.6619	50.0286	52.265	51.0508	50.5125	45.4964	47.473	49.9829	47.5626	50.5171	48.3748	38.2255	49.1609	49.3628	46.0281	45.3385	49.8676	49.9234	50.6743	50.0966	47.1048	47.9184	49.3216	49.2402	50.063	49.5754	50.9214	50.3479	50.4909	48.5107	50.2637	50.8515	50.505	51.1425	49.9184	51.199	51.5917	51.5047	52.1293	51.0494	51.8394	52.4244	52.0135	52.1905	50.133	50.1287	52.6343	52.0344	52.3312
2806.43	50.1813	49.5332	51.7893	50.5745	50.0355	44.9979	46.9831	49.5016	47.0922	50.0347	47.8819	37.7121	48.6765	48.878	45.5337	44.8701	49.3831	49.4386	50.188	49.6117	46.6047	47.4221	48.8389	48.7554	49.5825	49.0844	50.4359	49.8626	50.0192	48.0455	49.7823	50.3669	50.0163	50.6578	49.4482	50.7176	51.1143	51.0317	51.6487	50.5792	51.3545	51.9477	51.534	51.7193	49.6478	49.6601	52.1579	51.5643	51.8559
2808.36	49.6983	49.0261	51.3129	50.0888	49.5622	44.4972	46.4916	49.0165	46.6174	49.5528	47.3879	37.1984	48.189	48.3881	45.0395	44.395	48.8951	48.9519	49.6992	49.1229	46.0965	46.9275	48.3529	48.2688	49.0925	48.5928	49.9468	49.3734	49.5326	47.578	49.2971	49.8793	49.526	50.1678	48.9686	50.2368	50.6277	50.5504	51.1653	50.1062	50.8681	51.4663	51.0537	51.24	49.1571	49.1906	51.6784	51.0872	51.3848
2810.28	49.2166	48.5382	50.8322	49.6046	49.0843	43.9932	45.9968	48.5248	46.1395	49.069	46.8904	36.6858	47.6999	47.8976	44.5483	43.9184	48.4075	48.4631	49.2106	48.6318	45.592	46.4256	47.8618	47.7736	48.5919	48.1021	49.457	48.8823	49.0394	47.1043	48.8003	49.3832	49.0319	49.6675	48.481	49.756	50.1364	50.0621	50.6716	49.6245	50.3789	50.9854	50.5704	50.749	48.6666	48.7183	51.1958	50.6057	50.9062
2812.21	48.7425	48.0743	50.3582	49.1318	48.6037	43.498	45.5072	48.0409	45.6725	48.5896	46.3994	36.179	47.2225	47.4178	44.0625	43.4524	47.9295	47.9826	48.7297	48.1482	45.0953	45.9294	47.3798	47.2944	48.1133	47.6212	48.9746	48.4001	48.5553	46.6419	48.3112	48.8952	48.5421	49.1738	48.0057	49.2798	49.6599	49.5833	50.1931	49.156	49.8987	50.5081	50.0932	50.2799	48.1861	48.2521	50.7213	50.1396	50.4348
2814.14	48.2482	47.5813	49.8699	48.6401	48.1093	42.9896	45.0022	47.5445	45.1874	48.092	45.8962	35.6617	46.729	46.924	43.5566	42.968	47.4332	47.4867	48.2349	47.6545	44.5862	45.4185	46.8841	46.7982	47.615	47.1245	48.4802	47.8992	48.0547	46.1652	47.811	48.3929	48.0378	48.6713	47.5164	48.7828	49.1673	49.0917	49.698	48.6714	49.4002	50.0186	49.6007	49.7898	47.6854	47.7742	50.2332	49.6563	49.9444
2816.07	47.7507	47.0694	49.3798	48.1399	47.6182	42.4748	44.495	47.0468	44.7005	47.5939	45.3903	35.1456	46.2264	46.4235	43.0493	42.4792	46.932	46.9848	47.7313	47.1536	44.0779	44.9083	46.3832	46.2937	47.1075	46.6189	47.9798	47.397	47.5576	45.6834	47.3066	47.8872	47.535	48.1667	47.014	48.2832	48.6694	48.5963	49.2007	48.18	48.9012	49.5267	49.1039	49.2946	47.1839	47.2903	49.7433	49.1692	49.4558
2818	47.2457	46.5457	48.8758	47.6366	47.1147	41.9518	43.9796	46.5377	44.2017	47.0856	44.8735	34.6197	45.7164	45.9119	42.5388	41.9841	46.4215	46.4719	47.2182	46.6384	43.5524	44.3845	45.8678	45.7781	46.6001	46.1067	47.4584	46.8853	47.0564	45.1916	46.791	47.3714	47.019	47.647	46.5007	47.7756	48.1669	48.0923	48.6914	47.6801	48.3911	49.0185	48.5925	48.7929	46.6728	46.7929	49.2398	48.6664	48.9549
2819.93	46.7418	46.0366	48.3769	47.1302	46.612	41.436	43.4654	46.0269	43.7052	46.579	44.3544	34.0924	45.2128	45.4017	42.0278	41.4863	45.9136	45.9593	46.7079	46.1245	43.0289	43.866	45.3577	45.2645	46.0952	45.5957	46.9398	46.3726	46.5494	44.7015	46.2817	46.8572	46.499	47.1281	45.9984	47.2668	47.6612	47.5896	48.1808	47.1787	47.8837	48.5126	48.0848	48.2892	46.1578	46.3004	48.7338	48.1616	48.4456
2821.86	46.2213	45.5202	47.8645	46.6012	46.0986	40.9122	42.9424	45.5043	43.1984	46.0603	43.8252	33.5586	44.6935	44.877	41.501	40.9821	45.395	45.4369	46.1857	45.6013	42.4955	43.3382	44.837	44.7374	45.5605	45.0717	46.4209	45.853	46.0305	44.1995	45.7596	46.3358	45.9718	46.5973	45.4853	46.7434	47.138	47.076	47.6582	46.6589	47.3609	47.9945	47.568	47.7698	45.6339	45.795	48.2166	47.6514	47.9297
2823.79	45.7035	45.0016	47.3524	46.0872	45.5861	40.3858	42.4208	44.9858	42.6928	45.5433	43.2998	33.029	44.175	44.358	40.9731	40.4782	44.8802	44.9183	45.6684	45.0811	41.9636	42.8065	44.3125	44.2174	45.0319	44.5529	45.9093	45.3324	45.5135	43.6968	45.2355	45.8107	45.45	46.0698	44.9694	46.2269	46.6198	46.5635	47.1338	46.1461	46.8373	47.4799	47.0514	47.2543	45.1155	45.2888	47.6986	47.1434	47.4214
2825.72	45.1838	44.4656	46.8341	45.5668	45.0655	39.8482	41.8868	44.4616	42.1798	45.0173	42.7679	32.4938	43.6494	43.8305	40.4424	39.9648	44.3509	44.3894	45.14	44.5539	41.4249	42.2628	43.7772	43.6966	44.5138	44.0218	45.384	44.8029	44.9933	43.1883	44.7047	45.2727	44.9154	45.5361	44.444	45.7036	46.092	46.0427	46.604	45.6275	46.3067	46.9573	46.5212	46.7313	44.5857	44.7779	47.1715	46.6211	46.9013
2827.64	44.6611	43.9284	46.3129	45.0368	44.5484	39.3135	41.3539	43.9363	41.6666	44.4931	42.2342	31.9612	43.1242	43.3028	39.916	39.452	43.8166	43.8586	44.611	44.0244	40.8865	41.7181	43.2528	43.1688	43.9836	43.4887	44.8541	44.27	44.4656	42.6791	44.1717	44.7366	44.376	45.0015	43.9227	45.1777	45.5682	45.5168	46.0706	45.1038	45.7791	46.4309	45.9919	46.206	44.0541	44.2675	46.6509	46.1006	46.3781
2829.57	44.1228	43.3932	45.7756	44.4986	44.0147	38.7666	40.8133	43.3945	41.1444	43.9577	41.6863	31.4176	42.5869	42.7655	39.3786	38.9284	43.2737	43.3149	44.0704	43.4811	40.3388	41.1681	42.7174	42.6252	43.4329	42.9469	44.3103	43.7241	43.9236	42.1577	43.6219	44.1858	43.8297	44.4508	43.391	44.6368	45.0323	44.9745	45.5289	44.5709	45.2404	45.8925	45.4538	45.6708	43.5121	43.7425	46.1147	45.5682	45.8421
2831.5	43.583	42.8596	45.2391	43.9606	43.4754	38.2186	40.2691	42.8535	40.6178	43.4195	41.1386	30.8724	42.0483	42.2252	38.8405	38.4042	42.7333	42.7706	43.525	42.9357	39.7861	40.6223	42.172	42.0819	42.8896	42.4013	43.7637	43.1791	43.3812	41.6336	43.0757	43.6343	43.2824	43.902	42.8456	44.0939	44.4877	44.433	44.9858	44.0385	44.6918	45.3505	44.9137	45.1307	42.9677	43.2107	45.5721	45.0346	45.3064
2833.43	43.0346	42.2981	44.6898	43.4038	42.9305	37.6658	39.7157	42.3044	40.0771	42.868	40.5827	30.326	41.4997	41.6726	38.2871	37.8704	42.1842	42.216	42.9664	42.3776	39.2209	40.0582	41.6139	41.5247	42.3296	41.8472	43.203	42.6223	42.8261	41.0994	42.522	43.0742	42.7163	43.3348	42.2909	43.5416	43.9351	43.8841	44.4227	43.4881	44.1273	44.7949	44.3568	44.5763	42.4111	42.6722	45.0204	44.4864	44.7549
2835.36	42.4869	41.7248	44.1403	42.852	42.3897	37.114	39.1612	41.751	39.541	42.3156	40.0258	29.7826	40.9513	41.1194	37.7317	37.3385	41.6325	41.6597	42.4073	41.8212	38.6571	39.4945	41.0584	40.9659	41.7692	41.2927	42.6409	42.0643	42.2729	40.564	41.967	42.5132	42.1528	42.772	41.7409	42.9852	43.3867	43.3318	43.8668	42.9364	43.5703	44.2444	43.8009	44.0281	41.8535	42.1342	44.4673	43.9336	44.2022
2837.29	41.9252	41.1586	43.5794	42.3006	41.8329	36.5541	38.5965	41.1883	38.998	41.7534	39.4603	29.2304	40.3933	40.5586	37.1682	36.7936	41.0674	41.0949	41.8407	41.2553	38.0811	38.9224	40.4874	40.4007	41.1938	40.7249	42.0735	41.4977	41.7065	40.0139	41.3924	41.9354	41.5796	42.1965	41.1806	42.4159	42.8194	42.7666	43.3007	42.379	43.0059	43.6782	43.2331	43.4677	41.2819	41.577	43.9004	43.3665	43.638
2839.22	41.3785	40.6296	43.0322	41.7442	41.2879	36.0088	38.0431	40.6406	38.462	41.2099	38.908	28.689	39.8448	40.0089	36.6168	36.2561	40.5152	40.5435	41.2845	40.6989	37.5127	38.3536	39.9261	39.8425	40.6267	40.166	41.5217	40.9394	41.1412	39.4758	40.8259	41.3656	41.0183	41.6279	40.6259	41.8561	42.2618	42.2106	42.7382	41.8245	42.4421	43.1182	42.6768	42.9078	40.7196	41.0342	43.3436	42.8156	43.0783
2841.15	40.8298	40.085	42.4863	41.1882	40.7425	35.458	37.4889	40.0861	37.9206	40.6599	38.3509	28.1481	39.2947	39.4545	36.0656	35.7163	39.9607	39.9868	40.722	40.1388	36.9428	37.7853	39.366	39.2817	40.0654	39.6028	40.9659	40.3808	40.5876	38.9334	40.255	40.7901	40.4465	41.0555	40.0649	41.2927	41.7036	41.6478	42.1661	41.2555	41.8737	42.5523	42.1099	42.3433	40.1525	40.4837	42.7795	42.2575	42.5107
2843.07	40.2721	39.5148	41.9299	40.6353	40.1873	34.9004	36.9301	39.5231	37.3734	40.0977	37.7841	27.6023	38.7371	38.8948	35.5083	35.1722	39.3968	39.4211	40.1522	39.5709	36.3664	37.2078	38.7915	38.713	39.4915	39.0289	40.3967	39.8099	40.032	38.38	39.6742	40.2052	39.8589	40.4693	39.4907	40.7165	41.1236	41.0747	41.5841	40.6824	41.2898	41.9684	41.5275	41.7678	39.5726	39.9179	42.2014	41.6795	41.9328
2845	39.6988	38.9276	41.3554	40.0572	39.6134	34.3302	36.354	38.9508	36.8149	39.5203	37.2008	27.0478	38.1651	38.3189	34.9364	34.6114	38.8133	38.8386	39.5693	38.985	35.7738	36.6095	38.1919	38.1245	38.9018	38.4391	39.8032	39.2135	39.437	37.808	39.0732	39.6007	39.2508	39.8566	38.89	40.1206	40.5234	40.4795	40.9773	40.0904	40.679	41.3606	40.9227	41.1589	38.9671	39.3329	41.5982	41.0758	41.331
2846.93	39.1238	38.3472	40.7801	39.4768	39.0395	33.7609	35.7769	38.3765	36.2581	38.9453	36.6182	26.498	37.5949	37.7423	34.3606	34.0459	38.2303	38.2514	38.982	38.396	35.1799	36.0127	37.5916	37.5273	38.3061	37.8468	39.2077	38.6156	38.8285	37.2263	38.463	38.9886	38.6383	39.2414	38.2889	39.5208	39.9269	39.879	40.369	39.4916	40.0644	40.7521	40.3125	40.5504	38.3588	38.7423	40.9907	40.471	40.7224
2848.86	38.5411	37.7675	40.2017	38.8971	38.4643	33.189	35.1982	37.7991	35.6959	38.3687	36.0362	25.9486	37.0222	37.1652	33.7828	33.4819	37.6399	37.6583	38.3884	37.8055	34.584	35.4183	36.9938	36.9305	37.7095	37.2529	38.6116	38.0214	38.2413	36.6437	37.8544	38.3696	38.0283	38.6361	37.6953	38.9158	39.3282	39.2767	39.7651	38.8923	39.4579	40.1437	39.708	39.9539	37.7565	38.156	40.3898	39.8757	40.1176
2850.79	37.957	37.1881	39.6228	38.3173	37.8901	32.6196	34.6237	37.2238	35.1381	37.7946	35.4603	25.403	36.4517	36.5931	33.2156	32.9312	37.0556	37.0725	37.7996	37.2176	33.9997	34.8329	36.4044	36.3496	37.1239	36.6707	38.0201	37.4343	37.6574	36.0787	37.263	37.7703	37.4316	38.0402	37.1156	38.325	38.7361	38.6851	39.1684	38.3078	38.8738	39.5597	39.1234	39.3703	37.172	37.5875	39.8052	39.299	39.5306
2852.72	37.3677	36.5999	39.0336	37.7275	37.3096	32.0466	34.0462	36.6397	34.5724	37.2109	34.8775	24.8556	35.8736	36.0134	32.6416	32.3802	36.4705	36.4849	37.2088	36.6287	33.4207	34.2522	35.8227	35.7681	36.5401	36.0881	37.4293	36.8431	37.0578	35.5153	36.6796	37.1832	36.8417	37.4419	36.5383	37.7406	38.1499	38.1036	38.5767	37.7297	38.2932	38.9834	38.5424	38.7923	36.5941	37.0218	39.228	38.722	38.9508
2854.65	36.791	36.0165	38.4529	37.1511	36.738	31.4814	33.4749	36.0622	34.0116	36.6305	34.3013	24.3161	35.3017	35.4404	32.0758	31.836	35.8983	35.9112	36.6328	36.0556	32.8482	33.6816	35.2584	35.202	35.9695	35.5176	36.8576	36.2692	36.4891	34.9659	36.1123	36.6155	36.2721	36.8674	35.9736	37.176	37.5863	37.5442	38.0135	37.1717	37.7258	38.4223	37.9766	38.2384	36.0322	36.4729	38.6661	38.1651	38.3915
2856.58	36.2147	35.4329	37.8736	36.5708	36.16	30.9112	32.8955	35.4816	33.4491	36.0502	33.7205	23.7749	34.724	34.8635	31.5138	31.2872	35.3269	35.3414	36.0598	35.483	32.2767	33.1076	34.6917	34.6355	35.3944	34.9491	36.2913	35.6983	35.9352	34.4221	35.549	36.0504	35.706	36.3017	35.4162	36.6146	37.026	36.9855	37.4552	36.6192	37.1551	37.8622	37.4096	37.6756	35.4706	35.9255	38.0997	37.6085	37.8373
2858.51	35.64	34.8626	37.303	35.9898	35.5877	30.3513	32.3216	34.9072	32.8917	35.4783	33.1421	23.2388	34.1522	34.2912	30.9575	30.7448	34.7632	34.7771	35.4957	34.9174	31.7128	32.5391	34.1391	34.0738	34.8275	34.3863	35.7265	35.135	35.3777	33.8856	34.9916	35.4922	35.1456	35.7375	34.8662	36.0542	36.4717	36.4315	36.8956	36.0742	36.5929	37.299	36.8484	37.1155	34.9142	35.3853	37.5401	37.0546	37.2912
2860.43	35.0693	34.2863	36.7302	35.4192	35.0224	29.7952	31.7537	34.331	32.3347	34.9014	32.5676	22.7063	33.5817	33.7214	30.3981	30.2099	34.1945	34.2075	34.929	34.3518	31.1442	31.9688	33.5845	33.5094	34.2605	33.8237	35.1543	34.5704	34.8081	33.3526	34.4315	34.9329	34.5811	35.166	34.3101	35.4937	35.9085	35.874	36.3359	35.5222	36.027	36.7379	36.2865	36.5612	34.353	34.8388	36.9762	36.4993	36.7383
2862.36	34.5098	33.7118	36.1615	34.8539	34.4594	29.2407	31.1926	33.7618	31.7846	34.331	31.9964	22.1803	33.0173	33.1574	29.8436	29.677	33.6262	33.6456	34.3648	33.7915	30.58	31.3999	33.0251	32.9496	33.6903	33.2625	34.5863	34.0112	34.256	32.8204	33.8738	34.3729	34.0213	34.6027	33.762	34.9403	35.3457	35.3172	35.7802	34.9664	35.459	36.1817	35.7264	36.0033	33.7959	34.2923	36.4184	35.9463	36.1872
2864.29	33.9348	33.13	35.5768	34.2677	33.8771	28.6733	30.6166	33.1823	31.2211	33.7514	31.4141	21.6492	32.442	32.5768	29.2797	29.1284	33.0482	33.0721	33.7858	33.2161	30.0042	30.8248	32.4541	32.3832	33.1158	32.6892	34.0025	33.4369	33.6924	32.2711	33.2992	33.7932	33.4476	34.0259	33.1985	34.3669	34.7772	34.7479	35.1983	34.3995	34.8739	35.6042	35.1484	35.4259	33.2238	33.7348	35.8448	35.3727	35.6184
[truncated: 123 more rows]
[truncated: 51 more columns]
