# Supplementary material
Source: MDPI journal article supplement (https://www.mdpi.com/2073-4441/13/11/1475)
Supplement: s1 [file s1 › Supplementary files/S1_1_24052017_File.xls]

## Sheet: N1_
	hgch	veb	hc	hgch	lyd	hgch	lyd	lyd	veb	lyd	lyd	veb	hypl	hypl	lyd	veb	hc	hgch	hc	hc	all	hgch	veb	veb	all	hypl	all	hgch	hc	hc	lyd	hypl	lyd	veb	hc	all	hc	lyd	hypl	hgch	veb	hypl	lyd	hgch	hc	veb	all	hypl	hypl
WL_cm-1	1	2	3	4	5	6	7	8	9	10	11	12	13	14	15	16	17	18	19	20	21	22	23	24	25	26	27	28	29	30	31	32	33	34	35	36	37	38	39	40	41	42	43	44	45	46	47	48	49
948.977	1.01769	0.903639	1.33182	0.942116	0.944798	1.25009	1.57585	1.51545	1.35586	1.41049	1.36736	1.29666	1.19273	1.39946	0.578555	1.25074	0.819028	1.06787	1.29719	1.20209	0.833991	0.684747	1.0231		1.15289	0.946638	1.02602	1.09693	1.02197	1.59342	1.31701	1.17206	1.07238	1.17815	1.14816	1.34646	1.13912	1.01447	1.23105	1.77009	0.91736	0.910655	1.29076	1.22358	0.991077	0.981232	0.823524	0.786748	1.01657
950.906	1.08122	0.770317	1.21793	0.761718	0.879607	0.857817	0.868351	0.983554	0.999007	1.0803	1.00768	0.902688	0.832422	1.11784	0.405003	0.71079	0.441265	0.744967	0.718089	0.939819	0.87044	0.523429	0.847666		0.925329	0.671918	0.75963	1.06328	0.686622	1.07471	1.08941	0.779757	0.783336	1.00473	0.999908	1.09072	0.824621	0.624718	0.937393	1.16924	0.658348	0.622824	0.868901	1.27944	0.644821	0.723021	0.585175	0.465329	0.654559
952.835	1.13564	1.32364	1.27405	0.775834	0.784238	0.915522	0.683471	0.914991	1.01179	1.05497	0.852712	1.14608	0.804361	0.882855	0.469725	0.836722	0.698363	0.779131	0.797721	1.04629	0.698405	0.664083	0.953877		0.996336	0.903404	0.706116	1.31943	0.619691	0.838765	1.04936	0.795176	0.883686	1.10526	0.988326	0.898523	0.84106	0.682268	0.808643	0.942087	0.64546	0.528543	0.560291	1.15823	0.754623	0.715569	0.523799	0.358512	0.684595
954.764	0.772853	0.754421	0.664385	0.363136	0.292691	0.595459	0.302512	0.629116	0.765786	0.727735	0.586126	0.832237	0.59369	0.688285	0.39802	0.646398	0.416769	0.443586	0.631656	0.60761	0.595473	0.487892	0.642896		0.893375	0.659303	0.511852	0.629497	0.396625	0.524419	0.638683	0.653361	0.629702	0.731238	0.403061	0.532231	0.483203	0.454908	0.484421	0.599303	0.53652	0.380168	0.180104	0.566671	0.812212	0.340323	0.344702	0.483631	0.404196
956.693	0.828917	0.400251	0.583044	0.669362	0.474182	0.641015	0.500233	0.804538	0.465722	0.760675	0.653436	0.454095	0.645196	0.834442	0.399174	0.587315	0.406727	0.460782	0.736712	0.711743	0.759815	0.444605	0.698999		0.884854	0.698111	0.729531	0.310159	0.43462	0.488412	0.637769	0.722283	0.625787	0.624836	0.431215	0.779813	0.403344	0.379027	0.511434	0.426941	0.534632	0.380268	0.382507	0.509198	0.602224	0.301653	0.489387	0.715236	0.453779
958.622	0.867876	0.28699	0.656903	0.55567	0.17314	0.351319	0.213946	0.486527	0.133919	0.412564	0.39592	0.210598	0.434272	0.356643	0.183728	0.242741	0.076018	0.128015	0.396841	0.437894	0.514273	0.519478	0.501754		0.492762	0.467219	0.557453	0.387019	0.272294	0.221128	0.441839	0.38195	0.350912	0.622217	0.256238	0.466684	0.247077	0.108226	0.286363	0.251219	0.380486	0.357753	0.455947	0.37272	0.498996	0.174876	0.173106	0.20072	0.143467
960.55	0.678534	0.608066	0.471623	0.474392	0.371547	0.321018	0.245225	0.420875	0.41231	0.426003	0.450599	0.182463	0.645968	0.178107	0.145865	0.126671	0.168969	0.195879	0.342485	0.368447	0.399295	0.442736	0.316909		0.535132	0.354165	0.454174	0.43256	0.358636	0.198809	0.463811	0.368179	0.393448	0.785747	0.258905	0.384093	0.406634	0.259652	0.263262	0.396621	0.346524	0.342901	0.609396	0.678356	0.659868	0.070504	0.179384	0.302235	0.065386
962.479	0.763399	0.33281	0.426929	0.352794	0.275314	0.101964	0.174359	0.207064	0.452163	0.156405	0.292748	0.011644	0.419456	0.347433	0.023807	0.212318	0.071959	0.122619	0.250322	0.171748	0.432898	0.497137	0.307476		0.355535	0.283617	0.352119	0.194798	0.209328	0.216593	0.268307	0.136163	0.223674	0.424101	0.276181	0.317038	0.223488	0.209621	0.09807	0.179244	0.460608	0.473017	0.890639	0.263689	0.561675	0.303582	0.332203	0.384317	0.236937
964.408	0.715686	0.039992	0.431829	0.150809	0.505848	0.093353	0.125153	0.186431	0.307031	0.271259	0.138007	0.148099	0.168482	0.407353	0.037255	0.222046	0.074481	0.161855	0.120603	0.224931	0.327771	0.58268	0.263337		0.239268	0.355348	0.310923	0.14775	0.226605	0.190913	0.254249	0.142144	0.220562	0.29749	0.209361	0.278266	0.247748	0.364013	0.141921	0.099375	0.448657	0.418332	0.798571	0.085479	0.609878	0.22831	0.344076	0.140452	0.161862
966.337	0.848416	0.075499	0.599747	0.240338	0.317686	0.218759	0.407513	0.331969	0.485571	0.055281	0.173205	0.337893	0.17223	0.355564	0.13186	0.404104	0.320884	0.274075	0.286265	0.180185	0.523954	0.714174	0.319246		0.164824	0.34595	0.272555	0.427315	0.289875	0.392798	0.233616	0.133998	0.209996	0.056353	0.409768	0.21678	0.338567	0.442918	0.280667	0.346038	0.581829	0.529874	0.455942	0.513759	0.790515	0.514117	0.50395	0.298696	0.336646
968.266	0.668426	0.174197	0.558444	0.377915	0.106546	0.237097	0.278951	0.304359	0.423158	0.096725	0.227975	0.238306	0.114944	0.229814	0.147294	0.295904	0.308881	0.333712	0.31445	0.243883	0.51667	0.657374	0.288929		0.187766	0.25446	0.259565	0.555314	0.265454	0.339179	0.229526	0.228618	0.185611	0.111618	0.43658	0.274545	0.20247	0.449348	0.195578	0.33777	0.595045	0.509692	0.290939	0.459324	0.628516	0.591629	0.413736	0.51756	0.368972
970.194	0.887023	0.474412	0.705908	0.651234	0.542201	0.54021	0.493716	0.539307	0.522936	0.314893	0.476165	0.458549	0.216148	0.461555	0.243842	0.531237	0.534924	0.550248	0.506049	0.435587	0.733439	0.907192	0.478658		0.279045	0.506638	0.36806	0.687546	0.44602	0.445681	0.284532	0.389506	0.281236	0.317419	0.477438	0.446297	0.444317	0.660273	0.442225	0.496619	0.764252	0.817044	0.314676	0.514255	0.78575	0.843798	0.541181	0.69383	0.617483
972.123	1.04183	0.549437	0.628681	0.580138	0.332034	0.573843	0.594083	0.557188	0.460216	0.251482	0.579049	0.492699	0.344509	0.500131	0.255095	0.643424	0.596655	0.517423	0.522895	0.482022	0.804017	1.01126	0.488889		0.272895	0.527712	0.418263	0.601937	0.483457	0.530592	0.328113	0.312511	0.336713	0.213348	0.45243	0.449874	0.521609	0.616072	0.487895	0.523143	0.804946	0.928574	0.326009	0.503921	0.74523	0.81832	0.640531	0.572277	0.60752
974.052	1.27528	0.828158	0.918665	0.685839	0.599164	0.79038	0.654031	0.763717	0.638956	0.41633	0.812646	0.661125	0.623983	0.636638	0.403639	0.827471	0.86305	0.728369	0.709406	0.76877	1.06349	1.1245	0.665531		0.407979	0.611196	0.641306	0.615695	0.684336	0.777799	0.496226	0.557317	0.586134	0.484845	0.643655	0.650337	0.627115	0.758229	0.699582	0.69032	0.996866	1.0878	0.642989	0.789683	0.899049	0.95411	0.89726	0.902832	0.872163
975.981	1.18874	0.847871	0.992609	0.835303	0.712472	0.788909	0.759831	0.770285	0.706373	0.400108	0.790488	0.759966	0.679935	0.822676	0.422221	0.828093	0.863007	0.730462	0.760323	0.736515	1.23372	1.07395	0.746571		0.442278	0.520289	0.683173	0.632652	0.694249	0.752063	0.554745	0.533308	0.583701	0.653917	0.702297	0.72193	0.68376	0.809002	0.811047	0.755279	1.04539	1.13012	0.786019	0.773979	0.959429	0.90125	0.887335	1.02406	0.955805
977.91	1.37971	0.982878	1.25708	1.25206	0.878358	0.998241	1.12649	0.97539	1.00018	0.675931	0.97196	0.94613	0.970816	1.0854	0.609466	0.929107	1.02146	0.914452	1.04573	0.918321	1.40118	1.24444	0.95831		0.655834	0.74486	0.856019	0.930369	0.829487	0.95428	0.691296	0.739348	0.752185	0.89613	0.977814	0.978705	0.963338	1.04657	1.07133	1.08935	1.22305	1.27815	0.963032	0.955072	1.16918	1.03724	1.08468	1.20058	1.07784
979.839	1.52469	1.05695	1.23451	1.28271	1.09935	1.05108	1.12975	1.04979	1.10605	0.808641	1.10481	0.978161	1.00595	0.948194	0.69066	1.04895	1.03464	1.03585	1.04949	0.977116	1.40416	1.2863	1.03591		0.770687	0.863895	0.921685	0.921762	0.877631	1.02543	0.68092	0.822925	0.757277	0.807793	1.06249	1.04781	1.01564	1.10204	1.12279	1.14434	1.30358	1.26792	0.92156	1.10192	1.27266	1.20382	1.22406	1.22317	1.0366
981.767	1.68424	1.26674	1.36354	1.3503	1.35927	1.24613	1.16395	1.27576	1.21646	0.936404	1.36007	1.24042	1.10277	1.09505	0.799037	1.33089	1.2586	1.24962	1.22246	1.17423	1.5806	1.48689	1.23066		0.982373	1.09378	1.13005	1.02039	1.12477	1.24901	0.855117	0.992175	0.891858	0.95738	1.28111	1.24706	1.22068	1.30959	1.28448	1.28949	1.53066	1.42308	1.12074	1.28968	1.40697	1.44573	1.41568	1.47165	1.24512
983.696	1.6344	1.38269	1.46713	1.30588	1.3076	1.32865	1.33305	1.29044	1.28256	0.985952	1.3745	1.31181	1.2003	1.28177	0.847689	1.33137	1.3254	1.32379	1.33575	1.24754	1.61448	1.59772	1.28124		1.06755	1.23147	1.107	0.993046	1.17486	1.36977	0.89608	1.04446	0.956824	1.04393	1.3208	1.31929	1.36812	1.3392	1.35556	1.34173	1.59218	1.52703	1.12858	1.2855	1.39937	1.43892	1.40522	1.52407	1.34186
985.625	1.81957	1.53714	1.76778	1.6232	1.47326	1.62327	1.59957	1.50761	1.57624	1.25468	1.50145	1.40259	1.42259	1.3918	1.02858	1.5262	1.58788	1.58077	1.55471	1.443	1.74251	1.76205	1.496		1.26432	1.49127	1.26375	1.18991	1.32119	1.55101	1.05049	1.21831	1.12476	1.2427	1.50589	1.54504	1.58685	1.48765	1.52477	1.48381	1.76355	1.72562	1.2621	1.53172	1.6811	1.61521	1.58107	1.76245	1.5629
987.554	1.95354	1.52965	1.82125	1.78519	1.49808	1.71438	1.56952	1.58594	1.60115	1.29735	1.6244	1.44095	1.45202	1.43124	1.1294	1.55177	1.67278	1.63183	1.63473	1.51834	1.82738	1.80629	1.55892		1.31245	1.52071	1.39663	1.45298	1.3675	1.53227	1.07076	1.22964	1.16582	1.28621	1.53003	1.58741	1.61858	1.57076	1.57444	1.40923	1.85351	1.79712	1.43966	1.65991	1.85672	1.76626	1.64225	1.79072	1.66142
989.483	2.12981	1.70321	1.88936	1.99126	1.70114	1.88035	1.72223	1.81706	1.74903	1.4351	1.80531	1.70066	1.64145	1.71695	1.32795	1.87316	1.8808	1.82905	1.83396	1.70013	1.97295	2.00554	1.70125		1.46785	1.71725	1.60675	1.60386	1.54477	1.60393	1.24734	1.42495	1.39549	1.51305	1.70979	1.77337	1.8107	1.77766	1.78598	1.50793	2.03037	1.99399	1.7138	1.89673	2.02151	1.89772	1.85994	1.89477	1.90476
991.411	2.13323	1.83384	1.93887	2.17246	1.9911	1.92314	1.89831	1.87803	1.82663	1.52215	1.84813	1.80174	1.81743	1.79803	1.38796	1.95945	1.96106	1.88417	1.90635	1.83207	2.01189	2.08902	1.74621		1.5272	1.73819	1.68653	1.62406	1.67891	1.67687	1.3618	1.53429	1.471	1.61956	1.83277	1.88863	1.89148	1.86752	1.90165	1.68441	2.07618	2.08285	1.79475	1.9517	2.03798	1.92664	1.93166	2.05899	1.99905
993.34	2.36461	2.07592	2.2493	2.43677	2.26215	2.1595	2.22858	2.10329	2.10056	1.75576	2.03298	1.93395	2.03534	2.0785	1.51066	2.13256	2.14503	2.11244	2.1361	2.0538	2.24127	2.27844	1.9658		1.69201	1.93542	1.85641	1.76645	1.82056	1.87612	1.5319	1.67326	1.65897	1.75429	2.06347	2.07565	2.11513	2.07348	2.10764	1.98375	2.2481	2.29565	1.91602	2.1337	2.25047	2.06723	2.16193	2.32611	2.19938
995.269	2.48295	2.09312	2.38805	2.48982	2.181	2.25722	2.24976	2.20713	2.17921	1.81616	2.13733	2.06794	2.10024	2.22405	1.59152	2.2769	2.23177	2.17882	2.19248	2.08384	2.35857	2.41405	2.07829		1.78808	2.098	1.87473	1.86693	1.86697	1.98249	1.60371	1.75368	1.76027	1.80766	2.13112	2.21488	2.2213	2.19615	2.16223	2.13432	2.3508	2.39119	1.95253	2.34091	2.27266	2.18475	2.27771	2.39575	2.27366
997.198	2.70491	2.20412	2.54438	2.61856	2.37657	2.46661	2.39031	2.45636	2.24299	1.95525	2.34534	2.29817	2.24784	2.30284	1.76248	2.43715	2.47059	2.36745	2.37425	2.29131	2.56103	2.65185	2.23186		1.95217	2.30287	2.02861	2.04997	2.0199	2.21814	1.77533	1.96175	1.95669	2.05811	2.33295	2.43644	2.38844	2.40545	2.30919	2.38095	2.55127	2.5774	1.99185	2.64025	2.44649	2.52399	2.46254	2.50308	2.43969
999.127	2.73782	2.31494	2.61608	2.63742	2.48705	2.61347	2.62004	2.61298	2.3234	2.04132	2.40658	2.40373	2.35246	2.44704	1.84403	2.53923	2.56576	2.49429	2.45567	2.37523	2.71888	2.74707	2.34892		2.05661	2.40682	2.14032	2.17013	2.12188	2.31383	1.86221	2.05668	2.02197	2.17879	2.40463	2.49593	2.42163	2.49219	2.43654	2.48458	2.64374	2.62286	2.10993	2.63328	2.53841	2.6615	2.51698	2.54521	2.5488
1001.06	3.006	2.60917	2.84454	2.83412	2.66932	2.82084	2.87544	2.84979	2.59077	2.27885	2.61787	2.62318	2.52777	2.68602	2.02699	2.73475	2.75661	2.68892	2.63984	2.56499	2.91846	2.90903	2.5905		2.27333	2.60593	2.34112	2.43185	2.31372	2.49907	2.02311	2.20858	2.15801	2.30741	2.54918	2.66177	2.59743	2.713	2.64734	2.56346	2.83685	2.79083	2.44303	2.71448	2.76777	2.87724	2.70274	2.75968	2.80394
1002.98	3.19543	2.74703	3.06847	2.94533	2.8792	2.85779	2.93862	2.92626	2.74041	2.38679	2.76307	2.7312	2.59048	2.7129	2.15483	2.84269	2.8528	2.80454	2.75056	2.68534	3.02661	2.97219	2.70226		2.3549	2.75078	2.41096	2.59018	2.40469	2.55004	2.05774	2.27153	2.24665	2.40628	2.64373	2.79311	2.77964	2.83118	2.71996	2.64199	2.95283	2.96942	2.60317	2.74058	2.88968	3.00911	2.82693	2.95433	2.90826
1004.91	3.31101	3.00758	3.28487	3.17969	3.07535	3.03992	3.10257	3.11791	2.93094	2.49462	2.94087	2.90314	2.81434	2.83354	2.33367	3.10748	3.06256	3.01379	2.9689	2.89579	3.2553	3.11996	2.87786		2.54655	2.92755	2.57427	2.81491	2.58453	2.78978	2.20105	2.44802	2.42184	2.61853	2.83108	3.00966	2.99869	3.00774	2.92367	2.92474	3.14924	3.18875	2.76887	2.96778	3.10599	3.23108	3.09193	3.24834	3.07535
1006.84	3.36316	3.11361	3.31993	3.28605	3.14547	3.17305	3.21386	3.20523	3.0794	2.55671	3.03523	2.99584	2.91899	2.98631	2.43951	3.16447	3.1847	3.08246	3.08628	2.99517	3.39564	3.27267	2.96322		2.66215	3.00077	2.65803	2.87805	2.68536	2.96682	2.32679	2.53942	2.51628	2.68297	2.92698	3.11788	3.08852	3.08993	3.05243	3.06984	3.26788	3.28652	2.89465	3.17606	3.21154	3.36234	3.21334	3.30322	3.19111
1008.77	3.59652	3.27824	3.49516	3.50726	3.35121	3.41468	3.40938	3.44995	3.33049	2.76528	3.21096	3.17623	3.07437	3.24819	2.62411	3.4181	3.39201	3.29493	3.2951	3.20546	3.60473	3.50599	3.12767		2.84265	3.19177	2.83321	3.03553	2.84899	3.11944	2.52636	2.73791	2.73101	2.87081	3.10843	3.25567	3.27265	3.265	3.24413	3.26589	3.46826	3.4648	3.06053	3.34203	3.40924	3.54258	3.39215	3.43635	3.40213
1010.7	3.70943	3.35439	3.69224	3.66106	3.39215	3.5652	3.48686	3.58748	3.44012	2.88709	3.32451	3.27285	3.20849	3.43472	2.74796	3.59013	3.49077	3.42871	3.40929	3.31271	3.74001	3.61203	3.2654		2.96098	3.32199	2.97448	3.0795	2.95434	3.20594	2.62002	2.83407	2.84036	2.99794	3.2265	3.35372	3.40275	3.41217	3.40797	3.4161	3.59936	3.5604	3.11949	3.40812	3.53061	3.62035	3.54378	3.53123	3.50876
1012.63	3.88294	3.57366	3.90654	3.84908	3.62752	3.78335	3.77354	3.78753	3.64078	3.07973	3.52889	3.49509	3.44331	3.64263	2.94711	3.75215	3.70283	3.62747	3.58477	3.51975	3.94387	3.77794	3.47033		3.1382	3.5733	3.17387	3.27424	3.12149	3.34595	2.77983	2.9755	3.01665	3.18749	3.42713	3.59043	3.65343	3.61981	3.62163	3.55019	3.80221	3.7488	3.28116	3.63819	3.70471	3.80727	3.73298	3.78561	3.72876
1014.56	4.01275	3.69379	4.03403	3.91109	3.79139	3.89168	3.94607	3.90809	3.75869	3.17053	3.6613	3.67412	3.54599	3.7068	3.06271	3.83136	3.8426	3.7496	3.71742	3.63481	4.11214	3.9088	3.57203		3.28094	3.73611	3.2884	3.45108	3.23569	3.41714	2.86474	3.06571	3.12944	3.29209	3.54493	3.73017	3.81535	3.77959	3.7191	3.61296	3.92984	3.9027	3.37763	3.86963	3.8729	3.89017	3.83831	3.91877	3.90226
1016.49	4.26422	3.85285	4.26995	4.14507	3.94935	4.11106	4.13082	4.12822	3.96433	3.32268	3.85376	3.94227	3.75165	3.93503	3.25524	3.98155	4.05128	3.96048	3.95121	3.87269	4.29991	4.12693	3.77229		3.47944	3.87915	3.45499	3.6384	3.43144	3.64741	3.02395	3.25561	3.30687	3.48806	3.7638	3.92704	3.98936	3.94669	3.89044	3.84679	4.12014	4.10829	3.56927	4.12099	4.06494	4.11962	4.03366	4.10822	4.12869
1018.41	4.44791	4.08302	4.39683	4.331	4.06885	4.22715	4.26257	4.24844	4.08141	3.43533	4.02366	4.07314	3.93218	4.07543	3.38582	4.17549	4.17889	4.08971	4.05269	3.98449	4.38549	4.27067	3.89249		3.57112	4.00632	3.57007	3.68536	3.56176	3.80954	3.15107	3.39066	3.41997	3.63044	3.89878	4.07987	4.13068	4.05023	4.01039	3.99439	4.25897	4.23249	3.75614	4.22904	4.19418	4.28467	4.16586	4.23718	4.27206
1020.34	4.66912	4.35906	4.56672	4.55813	4.29003	4.43381	4.45873	4.46789	4.3167	3.66487	4.23747	4.24764	4.10846	4.1768	3.57078	4.42591	4.39261	4.28405	4.2899	4.17075	4.57946	4.48835	4.05597		3.71983	4.16378	3.76558	3.87251	3.73539	3.99131	3.33596	3.5766	3.61033	3.81938	4.10578	4.28058	4.33486	4.27181	4.22224	4.20664	4.4434	4.43982	3.97262	4.37753	4.42313	4.46046	4.35849	4.43338	4.47686
1022.27	4.78944	4.46086	4.74133	4.69433	4.39024	4.57525	4.61927	4.62575	4.40592	3.80632	4.33249	4.38084	4.22364	4.30309	3.71732	4.55268	4.53538	4.41338	4.43215	4.32929	4.7329	4.61435	4.20236		3.85996	4.34661	3.89992	4.06667	3.84584	4.14495	3.43809	3.67338	3.73424	3.90533	4.22077	4.41493	4.44061	4.44765	4.40213	4.37624	4.59694	4.59785	4.07363	4.44414	4.57767	4.61047	4.49288	4.55188	4.60252
1024.2	5.06515	4.64335	5.01849	4.9375	4.56678	4.81084	4.79877	4.83558	4.56786	4.00094	4.53324	4.58419	4.44004	4.57527	3.92276	4.79444	4.74783	4.62465	4.6286	4.52909	4.88664	4.79573	4.42736		4.05831	4.57464	4.07522	4.30656	4.02221	4.34896	3.59794	3.84089	3.90834	4.10004	4.41184	4.63106	4.62552	4.66634	4.62233	4.59075	4.81217	4.80054	4.25725	4.65734	4.74606	4.80288	4.72325	4.74777	4.7926
1026.13	5.23241	4.77576	5.22229	5.09651	4.71576	4.95899	4.89044	4.97456	4.69815	4.10302	4.71016	4.73973	4.60487	4.74202	4.06119	4.90754	4.86803	4.75797	4.78297	4.65506	5.01852	4.9573	4.58132		4.17095	4.67319	4.19226	4.41538	4.16197	4.47269	3.71401	3.99019	4.02173	4.27415	4.54966	4.76043	4.8036	4.81504	4.7508	4.71382	4.9659	4.96076	4.38717	4.86732	4.86963	4.95141	4.89183	4.88346	4.927
1028.06	5.44218	4.99201	5.40677	5.30397	4.94015	5.15958	5.18025	5.2046	4.96028	4.28136	4.90805	4.90421	4.79439	4.93933	4.27141	5.12648	5.07972	4.9705	4.9987	4.87938	5.22984	5.15331	4.78469		4.35853	4.84153	4.37047	4.52674	4.3497	4.67729	3.911	4.16736	4.20397	4.47621	4.75127	4.97073	4.9899	5.02121	4.9464	4.85755	5.16206	5.14276	4.53022	5.07429	5.06206	5.21708	5.08103	5.10748	5.13911
1029.99	5.59533	5.16683	5.45367	5.47311	5.11963	5.31064	5.4328	5.3679	5.16323	4.4238	5.06058	5.05236	4.90863	5.05157	4.41887	5.25514	5.22418	5.12192	5.15748	5.01041	5.39285	5.31102	4.94135		4.5092	4.99976	4.52153	4.6138	4.48828	4.83127	4.03304	4.28646	4.32624	4.58605	4.88671	5.11895	5.12275	5.13516	5.11264	4.9813	5.31204	5.27073	4.60668	5.24389	5.21623	5.38641	5.21705	5.26673	5.29748
1031.92	5.80539	5.36239	5.63919	5.658	5.38654	5.54566	5.6576	5.58638	5.38971	4.63742	5.2664	5.31743	5.11201	5.21092	4.60099	5.457	5.43393	5.34094	5.34382	5.21547	5.62105	5.51402	5.12738		4.70059	5.26431	4.72933	4.79972	4.68383	5.01748	4.19235	4.47542	4.5056	4.76109	5.10327	5.29374	5.34414	5.32689	5.30134	5.20225	5.51574	5.47037	4.79908	5.42197	5.4688	5.574	5.45206	5.47588	5.52171
1033.85	5.96928	5.52605	5.81921	5.80112	5.57139	5.69725	5.71226	5.75122	5.53911	4.77003	5.42561	5.4261	5.29143	5.38275	4.7527	5.64403	5.59937	5.48113	5.48624	5.37099	5.79742	5.64103	5.26107		4.84352	5.4614	4.85749	4.93655	4.81094	5.18114	4.30637	4.59275	4.64154	4.91134	5.26233	5.47331	5.49112	5.50124	5.43133	5.34392	5.67412	5.63345	4.99776	5.57374	5.65491	5.70285	5.63644	5.64291	5.67316
1035.77	6.15548	5.73625	6.02617	6.02743	5.75617	5.90389	5.88461	5.9691	5.75684	4.93778	5.63427	5.58393	5.49027	5.61573	4.9413	5.82747	5.80991	5.68977	5.70327	5.5673	5.99795	5.81074	5.44748		5.02661	5.63445	5.01328	5.1212	4.97727	5.40073	4.48087	4.76704	4.82655	5.1025	5.4519	5.67476	5.68762	5.71613	5.64673	5.57453	5.87849	5.86316	5.22626	5.80616	5.83111	5.92854	5.84927	5.84146	5.86374
1037.7	6.27206	5.83757	6.19346	6.21382	5.85649	6.05333	6.06318	6.12574	5.90876	5.04823	5.77721	5.72924	5.59202	5.7127	5.11381	6.01859	5.95167	5.85112	5.84404	5.71301	6.17938	6.00286	5.60128		5.16151	5.77574	5.14557	5.24303	5.111	5.53608	4.61897	4.89658	4.97214	5.24536	5.60318	5.79945	5.87688	5.86651	5.82106	5.75376	6.03925	6.03756	5.35594	5.98438	5.95156	6.10572	5.9753	5.99583	6.00218
1039.63	6.50799	6.00737	6.42407	6.43247	6.06537	6.27041	6.23896	6.3555	6.06453	5.23651	5.95943	5.93107	5.79927	5.89464	5.35317	6.25361	6.16897	6.04684	6.05931	5.91789	6.39112	6.23177	5.79469		5.3392	6.01345	5.33477	5.48203	5.29889	5.70018	4.77289	5.08054	5.16572	5.46407	5.80309	6.00083	6.0781	6.06657	6.02504	5.91836	6.22609	6.21912	5.50209	6.22468	6.17017	6.32731	6.16212	6.19388	6.20445
1041.56	6.7195	6.18803	6.57589	6.57822	6.24383	6.41694	6.44843	6.52346	6.20838	5.39889	6.1039	6.06725	5.98962	6.11483	5.49549	6.39981	6.33983	6.20244	6.21954	6.08621	6.55936	6.38788	5.95541		5.48765	6.16135	5.50067	5.65919	5.43842	5.8101	4.88877	5.22735	5.28782	5.62179	5.93516	6.16544	6.21285	6.22968	6.17273	6.04842	6.3887	6.37578	5.63704	6.37789	6.36606	6.48798	6.32731	6.3391	6.36708
1043.49	6.91887	6.39556	6.75822	6.78753	6.49193	6.6445	6.73629	6.742	6.47949	5.60258	6.30506	6.28253	6.17742	6.32164	5.68698	6.60716	6.5368	6.41717	6.41702	6.29194	6.78742	6.58761	6.15575		5.68609	6.28489	5.70831	5.86831	5.61914	6.02496	5.0675	5.40677	5.4688	5.78893	6.13436	6.39058	6.42009	6.43998	6.35634	6.25131	6.59745	6.5975	5.80868	6.58299	6.58135	6.67864	6.53367	6.5708	6.59595
1045.42	7.08581	6.55402	6.92742	6.9473	6.62213	6.8193	6.90493	6.91795	6.63795	5.74259	6.45475	6.45026	6.30795	6.47976	5.86432	6.72682	6.67603	6.57857	6.55296	6.45203	6.94159	6.75544	6.29813		5.83014	6.41735	5.84597	6.01484	5.77421	6.19834	5.19584	5.54021	5.61062	5.92025	6.31143	6.55131	6.6066	6.59446	6.51585	6.45456	6.76615	6.75062	5.93766	6.71047	6.74833	6.85705	6.68896	6.74451	6.77692
1047.35	7.26902	6.77774	7.14583	7.19423	6.81468	7.03504	7.12901	7.13671	6.80409	5.90445	6.66143	6.63628	6.52275	6.69537	6.06996	6.93564	6.89692	6.80671	6.77227	6.66667	7.13582	6.9516	6.48219		6.00912	6.68779	6.01365	6.22246	5.96089	6.41717	5.36013	5.71602	5.78522	6.11583	6.51697	6.74037	6.81044	6.77138	6.73182	6.67855	6.96592	6.94006	6.17145	6.87875	6.95014	7.07375	6.91492	6.96394	6.9824
1049.28	7.40724	6.93387	7.31345	7.39209	6.9792	7.19873	7.34048	7.29979	6.96063	6.04265	6.8365	6.8121	6.69897	6.85044	6.22869	7.10484	7.06691	6.96296	6.95073	6.80796	7.30601	7.10673	6.64178		6.15553	6.86105	6.15976	6.38345	6.09333	6.59631	5.49543	5.84633	5.91216	6.26571	6.66097	6.92887	6.96047	6.91245	6.90534	6.82644	7.13217	7.10314	6.3841	7.09561	7.10177	7.22871	7.09289	7.13354	7.13127
1051.2	7.63254	7.11519	7.52462	7.60375	7.19659	7.41689	7.56843	7.51178	7.20669	6.24721	7.04139	7.02577	6.90587	7.04202	6.43401	7.31593	7.27449	7.14076	7.15819	7.0041	7.47889	7.30875	6.84044		6.3406	7.0163	6.35069	6.58156	6.26861	6.77477	5.66678	6.02894	6.09204	6.45	6.85689	7.12598	7.14094	7.12494	7.10914	7.04504	7.34505	7.30352	6.59277	7.33403	7.30299	7.43338	7.28978	7.32082	7.34283
1053.13	7.78241	7.29758	7.6762	7.72397	7.36164	7.57632	7.69536	7.66637	7.40884	6.39591	7.20307	7.20358	7.04954	7.19871	6.59195	7.50124	7.42425	7.28624	7.30827	7.16905	7.63937	7.48128	7.01171		6.49122	7.17545	6.49739	6.71474	6.41842	6.90629	5.80156	6.17918	6.24394	6.60292	7.01131	7.26063	7.29746	7.3013	7.27846	7.20544	7.50836	7.45683	6.72823	7.44875	7.49841	7.59729	7.42387	7.47581	7.50068
1055.06	7.97137	7.54701	7.89692	7.94953	7.51619	7.78619	7.89082	7.87987	7.60192	6.58829	7.40075	7.42437	7.25381	7.39324	6.79925	7.71711	7.61787	7.49843	7.51852	7.36768	7.83599	7.69521	7.211		6.68335	7.41029	6.65924	6.85785	6.59774	7.09678	5.97061	6.35106	6.42131	6.814	7.21082	7.44351	7.51393	7.50373	7.48092	7.37082	7.69516	7.65011	6.89989	7.61258	7.705	7.80423	7.6448	7.66122	7.71141
1056.99	8.12997	7.72296	8.07511	8.14398	7.67819	7.9357	8.05405	8.0463	7.72348	6.72396	7.56991	7.59653	7.4194	7.54055	6.95902	7.88359	7.78663	7.6654	7.6858	7.5267	7.98445	7.85774	7.36655		6.84245	7.60478	6.80946	7.02922	6.74085	7.2484	6.10815	6.48168	6.55769	6.92395	7.3584	7.62697	7.70084	7.6748	7.64018	7.52326	7.87056	7.82621	7.01395	7.77998	7.82627	7.96365	7.83672	7.80907	7.8892
1058.92	8.35613	7.91632	8.27751	8.3476	7.93741	8.14476	8.27357	8.26478	7.95024	6.8971	7.75408	7.78978	7.62495	7.7592	7.15038	8.07575	8.01131	7.86691	7.89512	7.72685	8.19063	8.0421	7.54624		7.01383	7.7908	6.9922	7.25674	6.9192	7.44564	6.2745	6.66284	6.7353	7.09053	7.55356	7.85487	7.90269	7.8741	7.83466	7.72313	8.07746	8.03551	7.18702	7.96673	8.01874	8.16499	8.03185	8.04079	8.10326
1060.85	8.5633	8.08369	8.45294	8.53353	8.11563	8.33137	8.4139	8.4448	8.13003	7.02737	7.89016	7.95224	7.78772	7.91203	7.34534	8.21761	8.18025	8.03045	8.06113	7.87872	8.3623	8.19774	7.6907		7.13659	7.93034	7.13988	7.41703	7.06043	7.56923	6.39604	6.81064	6.88911	7.26868	7.73098	8.01686	8.06996	8.04225	7.99063	7.89021	8.23438	8.2107	7.40363	8.1274	8.19162	8.33468	8.19535	8.24739	8.27672
1062.78	8.79501	8.26632	8.66567	8.7319	8.28999	8.55165	8.60536	8.66489	8.3079	7.21478	8.09161	8.13184	7.95456	8.07858	7.54596	8.4023	8.37492	8.24177	8.26912	8.07695	8.55093	8.39249	7.87891		7.3231	8.10266	7.32805	7.56542	7.23982	7.7433	6.55341	6.98029	7.07025	7.47528	7.93259	8.2007	8.26165	8.23724	8.1857	8.07636	8.43116	8.41058	7.62208	8.35949	8.37031	8.55134	8.40097	8.42476	8.47906
1064.71	8.93628	8.40708	8.79163	8.89244	8.42493	8.72308	8.8133	8.83535	8.49046	7.3918	8.25676	8.30719	8.10285	8.27127	7.69658	8.56878	8.52372	8.39017	8.4243	8.24391	8.72542	8.5711	8.02934		7.48785	8.24177	7.4667	7.70432	7.39385	7.9023	6.68933	7.11513	7.19677	7.60003	8.0751	8.36197	8.41789	8.40544	8.35523	8.22456	8.59508	8.55803	7.7415	8.53004	8.51617	8.71711	8.56497	8.57951	8.62985
1066.64	9.09806	8.59198	8.98689	9.108	8.62582	8.92615	9.07306	9.05232	8.71708	7.56927	8.4628	8.52592	8.30686	8.47834	7.92459	8.80818	8.71982	8.58293	8.61916	8.44006	8.93241	8.79266	8.24288		7.65035	8.43754	7.64632	7.91415	7.57097	8.09095	6.85147	7.30252	7.36936	7.76842	8.25999	8.57519	8.62326	8.60541	8.56498	8.40713	8.7864	8.74111	7.87529	8.76113	8.7574	8.94825	8.77026	8.80131	8.82194
1068.56	9.2454	8.76402	9.19661	9.26937	8.80357	9.08671	9.21459	9.21133	8.8914	7.68145	8.64407	8.67078	8.45232	8.6043	8.08448	8.97972	8.88868	8.75025	8.76825	8.59326	9.11065	8.97856	8.42318		7.79248	8.61937	7.80369	8.06802	7.71058	8.24049	6.98168	7.43803	7.52153	7.92205	8.41639	8.7338	8.77873	8.75655	8.73345	8.54254	8.9553	8.91238	8.01494	8.95067	8.94993	9.0996	8.92848	8.97591	8.98587
1070.49	9.47278	9.00761	9.3989	9.46192	9.00396	9.28317	9.38201	9.40079	9.06237	7.84276	8.81658	8.84032	8.63256	8.81504	8.27038	9.17151	9.08529	8.94678	8.97933	8.79118	9.33001	9.15561	8.60029		7.98195	8.81455	7.97392	8.21783	7.86763	8.44013	7.14718	7.58996	7.70009	8.08342	8.60692	8.90532	8.96427	8.96719	8.91233	8.75291	9.14483	9.10631	8.18152	9.11489	9.13136	9.28027	9.11304	9.17137	9.18911
1072.42	9.66326	9.1582	9.54249	9.63876	9.14428	9.43455	9.52347	9.56837	9.22168	7.99635	8.95646	9.00849	8.80858	8.987	8.4531	9.32178	9.23921	9.10077	9.13684	8.95483	9.5063	9.28577	8.74738		8.12103	8.99118	8.11086	8.33875	7.99369	8.6026	7.27542	7.73008	7.82948	8.2134	8.75601	9.06521	9.12632	9.13584	9.04878	8.93035	9.31001	9.25672	8.28774	9.24788	9.29733	9.47331	9.27248	9.30511	9.36248
1074.35	9.82251	9.32564	9.72467	9.84698	9.37474	9.64047	9.70322	9.77951	9.38978	8.18776	9.14641	9.18632	8.99442	9.17026	8.64063	9.51282	9.44239	9.28953	9.3189	9.12299	9.69269	9.47386	8.91728		8.27742	9.1738	8.27816	8.49085	8.172	8.78744	7.43631	7.8969	7.97789	8.41434	8.93372	9.23605	9.3155	9.31403	9.22944	9.10686	9.50092	9.44744	8.47911	9.43143	9.48593	9.66832	9.4728	9.47609	9.54676
1076.28	9.96955	9.44204	9.89054	9.99162	9.57254	9.81844	9.87067	9.94377	9.52903	8.32971	9.31343	9.34305	9.12627	9.32091	8.80629	9.67438	9.60971	9.43781	9.4826	9.27717	9.86285	9.63465	9.06283		8.41987	9.29137	8.41814	8.65045	8.3126	8.94514	7.57154	8.03594	8.10971	8.59127	9.08325	9.40618	9.47691	9.47079	9.38757	9.28041	9.65181	9.60706	8.67988	9.59276	9.61582	9.80192	9.63424	9.65872	9.70444
1078.21	10.1717	9.61583	10.1219	10.2158	9.73951	10.0227	10.0794	10.1282	9.73725	8.48907	9.50347	9.53066	9.29701	9.49391	9.01195	9.85321	9.80057	9.62176	9.6768	9.47316	10.0504	9.81762	9.24328		8.59589	9.45752	8.60297	8.84471	8.47443	9.1177	7.71893	8.21066	8.28088	8.75564	9.25972	9.61245	9.66605	9.64056	9.58787	9.46346	9.8277	9.7881	8.86579	9.80562	9.8014	9.97167	9.82307	9.85566	9.89572
1080.14	10.3641	9.79133	10.2756	10.4239	9.86386	10.1861	10.2697	10.2781	9.8618	8.61997	9.64033	9.6883	9.46014	9.64589	9.14156	10.0061	9.9567	9.78931	9.83259	9.61718	10.2114	9.98685	9.3912		8.74589	9.60975	8.73607	8.98415	8.61281	9.24996	7.83314	8.32968	8.41894	8.88256	9.40244	9.75774	9.82406	9.77193	9.75548	9.59281	9.98523	9.95399	8.97772	9.94412	9.97738	10.1245	9.97706	9.99209	10.0541
1082.07	10.571	9.98382	10.4383	10.6315	10.0407	10.369	10.4532	10.4731	10.0318	8.77971	9.80476	9.86448	9.64951	9.84534	9.33499	10.2004	10.1421	9.98049	10.0197	9.80236	10.3945	10.1797	9.5669		8.90902	9.77824	8.88845	9.16566	8.77939	9.43296	7.98311	8.48297	8.58252	9.05828	9.58421	9.91701	10.0081	9.94746	9.93344	9.76878	10.171	10.1371	9.11473	10.1041	10.1719	10.3277	10.1664	10.1501	10.243
1083.99	10.7257	10.1418	10.5845	10.7535	10.1929	10.5176	10.5914	10.6319	10.2053	8.92313	9.95943	10.0256	9.79866	9.96865	9.52202	10.3599	10.2889	10.1131	10.1684	9.95419	10.5373	10.32	9.7159		9.04254	9.93807	9.03043	9.329	8.91882	9.54649	8.10073	8.6284	8.7143	9.1943	9.73859	10.0533	10.1517	10.1166	10.08	9.93214	10.3283	10.2885	9.20634	10.2725	10.3224	10.513	10.3237	10.3026	10.3999
1085.92	10.9283	10.3391	10.8082	10.9233	10.3839	10.6967	10.7815	10.8259	10.4034	9.09857	10.1541	10.2029	9.95541	10.1104	9.70378	10.547	10.4631	10.2868	10.3479	10.1305	10.7016	10.4848	9.88895		9.19483	10.1203	9.18625	9.46035	9.07253	9.68978	8.25131	8.77848	8.87102	9.35427	9.91152	10.2396	10.3095	10.3098	10.2482	10.103	10.5082	10.468	9.32793	10.4445	10.5067	10.7099	10.5102	10.4795	10.5864
1087.85	11.0967	10.4617	10.9764	11.0725	10.5577	10.8345	10.9519	10.9744	10.5491	9.21988	10.3022	10.3507	10.0956	10.2764	9.86765	10.6922	10.6071	10.4275	10.4899	10.2733	10.8383	10.6441	10.0249		9.32517	10.2642	9.30604	9.56663	9.2	9.84243	8.37756	8.90493	8.99739	9.4948	10.0563	10.3996	10.4517	10.4596	10.3879	10.2573	10.6585	10.6195	9.4755	10.5964	10.6355	10.8658	10.6613	10.6638	10.7363
1089.78	11.2647	10.6035	11.1338	11.24	10.7371	11.0086	11.1367	11.1579	10.7017	9.36008	10.4734	10.5125	10.2715	10.4749	10.0448	10.8672	10.79	10.5965	10.6745	10.4478	11.0044	10.8097	10.1854		9.48222	10.4247	9.46751	9.74557	9.35013	10.0293	8.52801	9.06687	9.15635	9.66588	10.2329	10.5558	10.6147	10.646	10.5666	10.435	10.8269	10.7887	9.69296	10.788	10.7939	11.0283	10.842	10.8623	10.9119
1091.71	11.4009	10.7635	11.2748	11.4187	10.9021	11.1687	11.2989	11.3068	10.8475	9.48724	10.6128	10.6482	10.4285	10.6142	10.1859	10.9978	10.94	10.7511	10.8192	10.5847	11.1601	10.957	10.3193		9.60687	10.5787	9.60703	9.8837	9.48428	10.1866	8.64907	9.18904	9.28312	9.7831	10.3644	10.6667	10.7463	10.7913	10.7195	10.5643	10.9742	10.9398	9.87334	10.9402	10.9267	11.1608	10.9831	11.0232	11.0558
1093.64	11.5848	10.9425	11.4464	11.6387	11.0436	11.3733	11.511	11.4813	11.0488	9.66067	10.7697	10.8335	10.5966	10.7896	10.3809	11.1679	11.1159	10.9342	10.9825	10.7536	11.3358	11.1352	10.4762		9.76189	10.7684	9.77647	10.0322	9.6368	10.3348	8.78887	9.32766	9.42235	9.92399	10.5214	10.8348	10.9096	10.9588	10.8894	10.7204	11.1412	11.1065	10.0261	11.0857	11.1179	11.3647	11.1577	11.154	11.2285
1095.57	11.7261	11.1138	11.5889	11.7869	11.174	11.527	11.6632	11.6328	11.1811	9.78738	10.9196	10.9681	10.7222	10.9311	10.5154	11.3091	11.2567	11.0773	11.1198	10.8945	11.4806	11.276	10.6175		9.89607	10.9103	9.90027	10.1713	9.76333	10.4539	8.91001	9.4402	9.53694	10.0533	10.6612	10.9949	11.0635	11.0967	11.0368	10.8739	11.284	11.2422	10.1524	11.2012	11.2869	11.5228	11.3014	11.2768	11.3816
1097.5	11.858	11.2766	11.7621	11.9394	11.3913	11.6914	11.8055	11.8115	11.3316	9.92924	11.084	11.1196	10.8698	11.1099	10.6676	11.4785	11.4264	11.2339	11.277	11.0619	11.6507	11.437	10.7736		10.0507	11.0642	10.0343	10.3488	9.90443	10.6136	9.04685	9.5782	9.68423	10.2167	10.8231	11.1588	11.2334	11.263	11.2044	11.0484	11.4486	11.4077	10.314	11.3675	11.4671	11.6724	11.455	11.4629	11.5589
1099.43	12.0079	11.4105	11.9245	12.0465	11.5426	11.8279	11.9296	11.9603	11.4412	10.0379	11.2113	11.2631	11.0158	11.2845	10.8348	11.6352	11.5648	11.3683	11.4136	11.1887	11.8032	11.5796	10.9155		10.186	11.1849	10.1508	10.4736	10.0184	10.7429	9.15519	9.7026	9.81306	10.3472	10.9562	11.2901	11.3722	11.4021	11.3409	11.1845	11.5889	11.5492	10.4262	11.5303	11.6134	11.7874	11.5876	11.643	11.6969
1101.35	12.1967	11.5812	12.124	12.2262	11.6803	12.0066	12.0826	12.1495	11.5969	10.1828	11.378	11.4178	11.181	11.444	11.0048	11.7993	11.7299	11.5298	11.5832	11.3587	11.9737	11.7434	11.0792		10.3299	11.3411	10.3098	10.6223	10.1631	10.8903	9.28184	9.8532	9.96302	10.5075	11.1076	11.4551	11.541	11.5535	11.5022	11.3376	11.7472	11.7073	10.5285	11.695	11.7577	11.9487	11.7601	11.8004	11.863
1103.28	12.3542	11.7304	12.2668	12.3828	11.8157	12.1526	12.2129	12.3016	11.7405	10.3119	11.5144	11.5454	11.3186	11.5449	11.1428	11.93	11.8695	11.6574	11.7223	11.4942	12.123	11.8601	11.2166		10.4437	11.4695	10.4294	10.7417	10.2975	11.0105	9.39228	9.96749	10.0833	10.6366	11.2323	11.572	11.6798	11.675	11.6245	11.4477	11.8808	11.8436	10.6573	11.8283	11.8748	12.0985	11.8963	11.9341	12.0061
1105.21	12.5198	11.898	12.4089	12.5866	11.9939	12.3283	12.3707	12.4672	11.9153	10.4687	11.6677	11.7084	11.4706	11.6878	11.3246	12.0816	12.0311	11.8213	11.8983	11.6484	12.295	12.0166	11.3443		10.5902	11.5994	10.5597	10.8677	10.4466	11.1679	9.52134	10.0992	10.2226	10.7788	11.3934	11.7238	11.8393	11.8272	11.7751	11.5929	12.0383	11.9947	10.8339	11.9728	12.0305	12.2659	12.0639	12.1144	12.1689
1107.14	12.6639	12.0414	12.5334	12.7418	12.1201	12.4698	12.5203	12.5931	12.0674	10.5926	11.7983	11.8392	11.5915	11.8165	11.4583	12.2044	12.1584	11.9559	12.0361	11.7784	12.4341	12.1534	11.4642		10.7122	11.7312	10.687	11	10.5686	11.3023	9.62259	10.2133	10.3389	10.8797	11.5259	11.8741	11.9748	11.9598	11.9085	11.7185	12.1721	12.1303	10.9626	12.1141	12.1796	12.3923	12.2166	12.253	12.299
1109.07	12.8204	12.1951	12.6984	12.9065	12.264	12.6258	12.691	12.7498	12.2571	10.7187	11.9354	11.986	11.7351	11.9558	11.6223	12.3729	12.3152	12.1141	12.179	11.9298	12.6031	12.3135	11.6232		10.8362	11.873	10.8354	11.1718	10.6967	11.4557	9.74459	10.3511	10.4734	11.0168	11.6788	12.031	12.1323	12.1172	12.0547	11.8658	12.326	12.2786	11.1106	12.2756	12.3551	12.5516	12.378	12.3888	12.452
1111	12.9299	12.3166	12.8187	13.0484	12.4149	12.7625	12.805	12.885	12.4188	10.8177	12.0527	12.1204	11.8595	12.0916	11.7826	12.5056	12.4499	12.2408	12.2992	12.0552	12.7377	12.447	11.7475		10.9414	12.0123	10.9466	11.2775	10.8076	11.5854	9.85349	10.4567	10.5843	11.1577	11.8046	12.1662	12.2523	12.2425	12.1817	12.0078	12.4584	12.4092	11.2246	12.4047	12.4912	12.6937	12.4991	12.5117	12.5842
1112.93	13.0783	12.4711	12.9631	13.1968	12.5838	12.9341	12.971	13.0466	12.5626	10.9533	12.1928	12.2746	12.0214	12.2533	11.9315	12.6481	12.6108	12.3952	12.4551	12.2121	12.8829	12.5847	11.8972		11.0775	12.1726	11.0815	11.3707	10.9453	11.7063	9.98325	10.5818	10.7181	11.3021	11.9609	12.3118	12.39	12.3889	12.3312	12.1795	12.6036	12.5662	11.3361	12.5508	12.6456	12.8434	12.64	12.6862	12.744
1114.86	13.2414	12.6251	13.0973	13.3205	12.7293	13.081	13.1515	13.1893	12.6423	11.0839	12.316	12.4014	12.1462	12.3761	12.0689	12.7798	12.7379	12.5232	12.5962	12.339	13.0151	12.7067	12.0221		11.2079	12.2871	11.2	11.5073	11.0677	11.8253	10.0855	10.6921	10.8378	11.415	12.0823	12.4103	12.5201	12.5194	12.454	12.2922	12.7333	12.6952	11.4477	12.6831	12.7621	12.9706	12.7628	12.8129	12.8766
1116.78	13.4023	12.7668	13.2545	13.4703	12.8798	13.2336	13.3239	13.3413	12.782	11.227	12.4707	12.5497	12.2777	12.5287	12.2302	12.9314	12.8899	12.6711	12.7443	12.4843	13.1524	12.8504	12.1561		11.3527	12.4316	11.3336	11.6694	11.1999	11.9929	10.2069	10.816	10.9661	11.5574	12.2212	12.5466	12.6766	12.6713	12.6034	12.4223	12.8765	12.8334	11.6123	12.8374	12.9038	13.12	12.9099	12.9561	13.0338
1118.71	13.5205	12.872	13.3741	13.5777	12.9714	13.3673	13.4479	13.4844	12.9169	11.3321	12.5991	12.6691	12.4129	12.6555	12.3402	13.0637	13.0133	12.7973	12.8554	12.6075	13.274	12.9894	12.2818		11.4563	12.5364	11.4568	11.749	11.2981	12.1271	10.3037	10.9298	11.0665	11.6711	12.3478	12.6634	12.7935	12.7951	12.7309	12.5391	13.0015	12.9629	11.7243	12.9679	13.0356	13.2684	13.0421	13.0883	13.1663
1120.64	13.6734	13.0035	13.5247	13.7155	13.1129	13.5245	13.5835	13.6451	13.0479	11.4589	12.7353	12.8024	12.5634	12.792	12.4996	13.2046	13.1524	12.9341	13.0013	12.7478	13.412	13.1347	12.4222		11.5837	12.6789	11.5806	11.8644	11.409	12.2527	10.4139	11.0581	11.1871	11.7874	12.4909	12.8003	12.9253	12.9338	12.8691	12.6663	13.1496	13.1062	11.8332	13.1139	13.1856	13.4376	13.1993	13.2436	13.3019
1122.57	13.7963	13.1153	13.6617	13.8395	13.2457	13.6376	13.6993	13.7715	13.1439	11.5634	12.856	12.9141	12.6787	12.9129	12.6385	13.3064	13.279	13.0402	13.1208	12.8639	13.5184	13.2503	12.5301		11.6978	12.8013	11.6804	11.9904	11.5144	12.3524	10.5079	11.1502	11.2934	11.9074	12.6043	12.9262	13.043	13.0492	12.9803	12.7702	13.2677	13.2169	11.9317	13.2174	13.3063	13.5729	13.322	13.3713	13.4226
1124.5	13.9118	13.2256	13.8239	13.9963	13.3876	13.7724	13.8689	13.9169	13.3086	11.6952	12.9835	13.0566	12.8127	13.0416	12.7785	13.4471	13.4158	13.1805	13.2643	12.9973	13.6449	13.3924	12.6652		11.8242	12.9453	11.8044	12.1158	11.6408	12.4749	10.625	11.2686	11.4166	12.0487	12.7335	13.0663	13.1785	13.1705	13.1149	12.9136	13.3936	13.3523	12.0507	13.3434	13.4379	13.6814	13.4659	13.4838	13.5664
1126.43	14.0098	13.3515	13.9519	14.1309	13.5113	13.8916	13.9873	14.0344	13.4608	11.8116	13.0856	13.1828	12.925	13.1455	12.9195	13.5602	13.5339	13.3003	13.3794	13.1181	13.7667	13.5144	12.7758		11.9195	13.0576	11.9162	12.231	11.7415	12.5746	10.7208	11.3735	11.5236	12.1496	12.8355	13.1878	13.2903	13.2908	13.2386	13.0387	13.504	13.4627	12.1648	13.4678	13.5373	13.7763	13.5801	13.596	13.6891
1128.36	14.1626	13.5176	14.0745	14.2507	13.6399	14.0411	14.1046	14.1736	13.5996	11.9428	13.22	13.324	13.0483	13.2757	13.0558	13.6976	13.6768	13.4341	13.5164	13.2534	13.8948	13.6498	12.9002		12.0376	13.1825	12.0438	12.3536	11.8596	12.704	10.8285	11.4871	11.6458	12.2654	12.9617	13.3126	13.4178	13.4256	13.3747	13.1825	13.634	13.5908	12.293	13.5845	13.677	13.9194	13.7123	13.7556	13.8245
1130.29	14.3059	13.6351	14.1721	14.3582	13.7185	14.1699	14.2298	14.2928	13.7076	12.0319	13.3339	13.4249	13.1353	13.3976	13.1691	13.8147	13.7858	13.5425	13.6242	13.3641	14.0122	13.7471	13.0007		12.1415	13.3	12.1301	12.4231	11.9597	12.8127	10.9163	11.5736	11.741	12.3683	13.0642	13.4177	13.5321	13.5339	13.4874	13.3086	13.75	13.6986	12.3829	13.6633	13.8014	14.0326	13.8305	13.8768	13.9348
1132.21	14.4318	13.7478	14.3034	14.5081	13.8607	14.3053	14.3748	14.4302	13.8514	12.1341	13.4622	13.5547	13.2521	13.5236	13.3169	13.9408	13.9078	13.6725	13.7535	13.4878	14.1481	13.8729	13.117		12.2538	13.4208	12.2397	12.5318	12.0709	12.9188	11.0175	11.6818	11.8503	12.4909	13.1912	13.5446	13.6561	13.6703	13.6062	13.4086	13.8786	13.8197	12.4951	13.7757	13.9127	14.1763	13.9684	13.9846	14.0666
1134.14	14.5291	13.8463	14.392	14.6359	13.9816	14.4181	14.4781	14.5362	13.9623	12.2263	13.5795	13.6619	13.3661	13.6066	13.4103	14.0553	14.0065	13.7784	13.8636	13.5914	14.2609	13.9948	13.2118		12.3463	13.5034	12.3415	12.6533	12.1555	13.0093	11.0949	11.7758	11.9369	12.5755	13.2982	13.6446	13.7556	13.7783	13.7096	13.4959	13.9773	13.9329	12.589	13.9058	14.0214	14.2711	14.0746	14.101	14.1788
1136.07	14.6538	13.9765	14.4913	14.7738	14.0973	14.5454	14.6015	14.6606	14.0525	12.3481	13.6983	13.7801	13.4791	13.7042	13.5466	14.1692	14.1311	13.8987	13.9738	13.7033	14.389	14.1015	13.3279		12.4481	13.6141	12.446	12.7857	12.2568	13.1297	11.1943	11.8831	12.0432	12.6907	13.4162	13.736	13.8723	13.8864	13.8258	13.6134	14.0944	14.056	12.7121	14.0436	14.1645	14.3856	14.1915	14.2308	14.3062
1138	14.7695	14.0595	14.5944	14.8849	14.1996	14.6522	14.7206	14.7617	14.1374	12.4394	13.7882	13.8765	13.562	13.7964	13.674	14.254	14.2307	13.9998	14.0711	13.8044	14.4951	14.1963	13.4269		12.5411	13.7244	12.5285	12.8622	12.341	13.236	11.2737	11.9618	12.1393	12.7939	13.5124	13.8322	13.9789	13.9862	13.9225	13.7156	14.1912	14.1445	12.8105	14.1605	14.2795	14.5013	14.2882	14.3391	14.4018
1139.93	14.8816	14.1623	14.7192	15.0104	14.3208	14.7757	14.8247	14.8884	14.2495	12.5339	13.9015	13.9834	13.677	13.9191	13.7767	14.3726	14.3468	14.1138	14.1899	13.9205	14.6106	14.3115	13.5379		12.6568	13.8333	12.6326	12.9563	12.4419	13.3536	11.3682	12.0606	12.2396	12.902	13.6264	13.9633	14.0941	14.0943	14.0411	13.8404	14.2999	14.2575	12.9025	14.2783	14.3866	14.6117	14.408	14.4564	14.5046
1141.86	14.9727	14.2674	14.8007	15.1065	14.4202	14.8763	14.9356	14.9887	14.3563	12.609	13.9843	14.0765	13.7721	14.0173	13.8874	14.4636	14.4413	14.1964	14.2889	14.0083	14.7122	14.4046	13.6319		12.7349	13.9131	12.7175	13.0684	12.5249	13.4411	11.4357	12.1417	12.3134	12.9804	13.7093	14.0495	14.189	14.1805	14.1423	13.9465	14.3946	14.359	12.99	14.3541	14.4726	14.705	14.5033	14.54	14.5994
1143.79	15.0888	14.3685	14.9217	15.2083	14.534	14.9974	15.0671	15.1081	14.483	12.7032	14.0892	14.1812	13.8845	14.1274	14.0136	14.5835	14.5488	14.3092	14.4048	14.1221	14.8237	14.5073	13.7319		12.8222	14.0057	12.817	13.1682	12.6181	13.5418	11.5141	12.2357	12.4093	13.0843	13.817	14.144	14.2917	14.2816	14.2413	14.0375	14.503	14.4644	13.0811	14.4527	14.5748	14.8123	14.6166	14.6487	14.7126
1145.72	15.1955	14.437	15.0385	15.2947	14.6306	15.0831	15.1479	15.2077	14.5903	12.7762	14.1775	14.2596	13.9769	14.2326	14.0871	14.6632	14.6359	14.3982	14.4947	14.2081	14.9089	14.598	13.8119		12.8965	14.1087	12.8962	13.2433	12.6967	13.619	11.5874	12.3121	12.4783	13.1628	13.9051	14.2399	14.3748	14.3669	14.3248	14.1133	14.5905	14.5514	13.1315	14.5366	14.6607	14.8842	14.7164	14.7382	14.798
1147.65	15.2967	14.5566	15.1557	15.4133	14.7453	15.1835	15.2462	15.3151	14.6999	12.8736	14.2748	14.3614	14.0765	14.3459	14.2112	14.7495	14.7466	14.5052	14.5971	14.3046	15.0181	14.7017	13.9099		12.9902	14.2232	12.98	13.3358	12.7861	13.7126	11.6746	12.398	12.5664	13.2607	14.0012	14.3405	14.4805	14.4654	14.4223	14.2083	14.6954	14.6501	13.22	14.6346	14.7715	14.9873	14.8139	14.8356	14.905
1149.57	15.3728	14.6476	15.2299	15.5123	14.8278	15.2716	15.3363	15.4042	14.7488	12.958	14.3558	14.4665	14.1512	14.4348	14.3114	14.8414	14.8325	14.5903	14.6806	14.3869	15.0999	14.7825	13.9824		13.0682	14.2904	13.0488	13.399	12.8596	13.7935	11.7403	12.4663	12.6459	13.3362	14.0833	14.4086	14.5605	14.5471	14.4967	14.2751	14.7769	14.7238	13.3178	14.7154	14.8478	15.0908	14.8845	14.9156	14.9899
1151.5	15.4864	14.7453	15.3264	15.6259	14.9453	15.3889	15.4282	15.506	14.8513	13.0493	14.4539	14.5568	14.2452	14.5318	14.3994	14.9433	14.9336	14.6862	14.7766	14.4937	15.1872	14.883	14.0693		13.1592	14.366	13.1286	13.4803	12.955	13.8763	11.8175	12.5549	12.7316	13.4265	14.1781	14.5081	14.6504	14.6569	14.5947	14.3718	14.8746	14.8181	13.4131	14.8079	14.9419	15.2032	14.9907	15.02	15.0905
1153.43	15.5769	14.8221	15.4158	15.7086	15.0215	15.4761	15.5132	15.5906	14.9513	13.1094	14.5265	14.626	14.327	14.6035	14.4921	15.0232	15.0178	14.7671	14.8512	14.5705	15.2604	14.9657	14.1454		13.2338	14.4263	13.1992	13.5653	13.0308	13.9553	11.873	12.6163	12.7953	13.5038	14.2591	14.594	14.7318	14.7343	14.6801	14.459	14.9559	14.9007	13.477	14.8905	15.0226	15.2973	15.0875	15.1025	15.1714
1155.36	15.6674	14.9167	15.5068	15.8038	15.1162	15.5801	15.6234	15.6968	15.0448	13.1947	14.6178	14.7219	14.4237	14.6897	14.5955	15.1125	15.1118	14.8598	14.9553	14.6661	15.3552	15.0608	14.2427		13.3164	14.5324	13.2887	13.6505	13.1038	14.0504	11.9479	12.6945	12.882	13.5897	14.35	14.6819	14.8244	14.8156	14.7805	14.5538	15.0476	14.9953	13.5632	14.9974	15.1219	15.3905	15.1744	15.1995	15.2727
1157.29	15.7562	15.0037	15.5683	15.886	15.1881	15.6587	15.7123	15.78	15.1002	13.2696	14.6931	14.7914	14.4939	14.752	14.6716	15.1719	15.1799	14.9329	15.0296	14.7423	15.4301	15.128	14.3136		13.3801	14.6147	13.3542	13.7033	13.1572	14.116	12.012	12.7578	12.9551	13.6538	14.418	14.7485	14.9009	14.8867	14.8555	14.6264	15.1226	15.0685	13.6282	15.0786	15.2091	15.4613	15.243	15.2702	15.3603
1159.22	15.8503	15.0999	15.6545	15.9768	15.2863	15.7536	15.8194	15.8786	15.1936	13.3543	14.7781	14.8846	14.5848	14.8409	14.7887	15.2734	15.2692	15.0234	15.1177	14.8312	15.5135	15.212	14.3905		13.4587	14.7068	13.4257	13.7923	13.2399	14.1966	12.0876	12.8335	13.0322	13.7385	14.507	14.8458	15.0049	14.9847	14.9357	14.7125	15.2084	15.151	13.6936	15.1588	15.3067	15.5618	15.3324	15.3768	15.4522
1161.15	15.9113	15.1735	15.7418	16.0381	15.3666	15.8308	15.8917	15.9575	15.289	13.4114	14.8551	14.9609	14.6586	14.9064	14.8575	15.3532	15.342	15.0909	15.1941	14.895	15.584	15.284	14.4594		13.5197	14.7624	13.4824	13.8876	13.3069	14.2659	12.1396	12.8934	13.0943	13.8082	14.5736	14.92	15.0852	15.0599	14.9952	14.7728	15.2797	15.2228	13.7411	15.2354	15.389	15.6192	15.4094	15.4658	15.5239
1163.08	15.9921	15.2633	15.8404	16.1353	15.4601	15.9233	15.9812	16.0456	15.3868	13.4862	14.9415	15.0367	14.7274	14.9854	14.9446	15.4462	15.4322	15.1821	15.2814	14.9832	15.6756	15.3687	14.548		13.5961	14.843	13.5617	13.9671	13.3831	14.3483	12.2063	12.9658	13.1676	13.8861	14.6523	15.0048	15.1662	15.1428	15.0796	14.857	15.3712	15.3134	13.8232	15.327	15.4879	15.7045	15.5068	15.5479	15.6147
1165	16.0638	15.3298	15.9066	16.2199	15.5312	15.9929	16.0605	16.113	15.4547	13.5435	15.0046	15.0937	14.7825	15.0588	15.0439	15.5127	15.5066	15.2488	15.348	15.0529	15.7509	15.4402	14.6162		13.6549	14.9147	13.6355	13.994	13.4467	14.4094	12.2596	13.0173	13.2212	13.9442	14.7161	15.0737	15.2287	15.2158	15.1552	14.9422	15.44	15.3818	13.8987	15.385	15.5512	15.7739	15.5776	15.6086	15.6887
1166.93	16.1398	15.4088	16.0014	16.3071	15.6068	16.0851	16.1386	16.2062	15.5373	13.628	15.0836	15.1851	14.8694	15.1469	15.1283	15.5831	15.5934	15.3275	15.4332	15.1383	15.838	15.52	14.7004		13.7287	15.0029	13.7126	14.0434	13.51	14.4822	12.3216	13.0881	13.2949	14.0174	14.8019	15.1444	15.3061	15.3017	15.2383	15.0357	15.5157	15.4625	13.9737	15.4543	15.6206	15.8553	15.6641	15.6972	15.7768
1168.86	16.2212	15.4815	16.0811	16.3836	15.6665	16.1498	16.2123	16.2813	15.6089	13.6938	15.1419	15.2577	14.9448	15.2174	15.1936	15.6546	15.6591	15.3901	15.4962	15.1985	15.9168	15.5872	14.761		13.7915	15.0912	13.767	14.091	13.5589	14.5423	12.3695	13.1427	13.3512	14.0737	14.8641	15.2023	15.3701	15.3646	15.3121	15.0957	15.5798	15.525	14.0344	15.5247	15.6908	15.9226	15.7311	15.7629	15.8378
1170.79	16.3093	15.5568	16.1581	16.4757	15.763	16.2465	16.3037	16.3649	15.7058	13.76	15.2127	15.3246	15.0218	15.2876	15.286	15.7325	15.7397	15.4665	15.5808	15.2786	16.0033	15.6666	14.8294		13.8614	15.1766	13.8315	14.1664	13.6316	14.6224	12.4383	13.2164	13.4214	14.1467	14.94	15.2774	15.4511	15.4365	15.394	15.1661	15.6569	15.6009	14.1088	15.5997	15.7698	16.008	15.804	15.8555	15.9122
1172.72	16.3655	15.6101	16.2142	16.5287	15.8308	16.3147	16.3762	16.4208	15.7629	13.8036	15.2777	15.3832	15.0785	15.3477	15.3444	15.788	15.7993	15.527	15.6435	15.3392	16.0642	15.7346	14.875		13.9148	15.2404	13.8795	14.2305	13.6866	14.6868	12.4868	13.2725	13.4765	14.2089	15.0014	15.3262	15.5025	15.4895	15.4506	15.2062	15.7165	15.6644	14.1418	15.6469	15.8269	16.0701	15.8663	15.9355	15.9804
1174.65	16.4339	15.696	16.2932	16.601	15.9155	16.386	16.4406	16.5051	15.832	13.8604	15.3515	15.463	15.1509	15.433	15.4276	15.871	15.8738	15.6048	15.7252	15.413	16.137	15.8115	14.9377		13.9846	15.2903	13.946	14.3068	13.7472	14.7504	12.5409	13.3331	13.5406	14.2907	15.0708	15.3924	15.5643	15.5666	15.5208	15.2592	15.7871	15.7352	14.1889	15.7171	15.9016	16.1414	15.9547	16.0007	16.0652
1176.58	16.5013	15.7525	16.3519	16.6664	15.9912	16.4483	16.4762	16.57	15.8738	13.917	15.4007	15.5187	15.2097	15.4952	15.5065	15.9293	15.9363	15.6717	15.7783	15.4734	16.1995	15.8688	14.9989		14.0404	15.3262	13.9949	14.3609	13.7955	14.7975	12.5871	13.3793	13.5884	14.3457	15.1316	15.4606	15.6136	15.6276	15.5775	15.3146	15.8467	15.7876	14.2422	15.7903	15.9686	16.2139	16.0136	16.0389	16.1188
1178.51	16.593	15.8074	16.4241	16.7452	16.0699	16.5258	16.5519	16.6421	15.9337	13.9914	15.4685	15.582	15.278	15.5582	15.5709	16.0023	16.009	15.7466	15.8502	15.5417	16.2712	15.9379	15.0732		14.0974	15.3786	14.0563	14.4203	13.8599	14.86	12.6445	13.4374	13.6518	14.4037	15.2056	15.53	15.6828	15.6928	15.6431	15.3874	15.9159	15.8616	14.337	15.8657	16.0378	16.2809	16.0819	16.1113	16.1883
1180.44	16.6463	15.8543	16.4634	16.812	16.1091	16.5789	16.6172	16.6979	15.9904	14.0374	15.5127	15.6456	15.3279	15.5985	15.6332	16.0498	16.06	15.7937	15.9113	15.5959	16.3237	15.9831	15.1309		14.1431	15.4232	14.1099	14.4629	13.911	14.9183	12.6755	13.4767	13.6968	14.451	15.2558	15.5751	15.7428	15.7419	15.6935	15.4611	15.9683	15.9231	14.3796	15.9163	16.0784	16.338	16.1383	16.1702	16.247
1182.36	16.6986	15.9197	16.5217	16.896	16.1634	16.6499	16.6999	16.7708	16.0611	14.0922	15.5717	15.7228	15.3981	15.6607	15.7071	16.1121	16.1282	15.8609	15.9802	15.6642	16.3832	16.0511	15.1929		14.2026	15.4806	14.168	14.5103	13.9644	14.9916	12.7191	13.5331	13.7505	14.5176	15.3177	15.6485	15.8032	15.8127	15.7519	15.5332	16.0286	15.9836	14.4236	15.9692	16.1409	16.4152	16.2105	16.2481	16.3171
1184.29	16.7572	15.9844	16.5796	16.9438	16.2152	16.7074	16.7511	16.8203	16.1203	14.1299	15.6234	15.766	15.4364	15.7182	15.7541	16.1703	16.1792	15.9105	16.0253	15.7133	16.4264	16.1039	15.2246		14.2431	15.5393	14.2036	14.5503	13.9981	15.0347	12.7555	13.5712	13.79	14.5622	15.3605	15.699	15.848	15.8537	15.8067	15.5778	16.0741	16.0294	14.479	16.0147	16.198	16.4663	16.2648	16.3079	16.3708
1186.22	16.8393	16.055	16.6615	16.9993	16.2882	16.7758	16.8064	16.8893	16.1986	14.1827	15.6915	15.8212	15.4908	15.7798	15.8438	16.2293	16.2448	15.9705	16.0935	15.7755	16.4884	16.1657	15.2729		14.2888	15.6233	14.2557	14.6171	14.0441	15.0904	12.8041	13.6205	13.8401	14.6225	15.4141	15.754	15.9075	15.9056	15.8726	15.6382	16.1334	16.0922	14.537	16.1049	16.2685	16.5241	16.3205	16.367	16.4387
1188.15	16.8738	16.0998	16.72	17.0523	16.3348	16.8271	16.8566	16.9439	16.2429	14.2313	15.7435	15.8692	15.5374	15.8207	15.902	16.2666	16.2973	16.0149	16.1511	15.8234	16.5328	16.2115	15.3168		14.3274	15.6599	14.2982	14.6575	14.0856	15.1259	12.8375	13.6552	13.8745	14.6678	15.453	15.7991	15.9543	15.9568	15.9097	15.6653	16.1777	16.1438	14.5511	16.1593	16.3255	16.5787	16.3545	16.4111	16.4857
1190.08	16.9296	16.1512	16.7785	17.1177	16.3862	16.8894	16.9199	17.0115	16.2922	14.2939	15.7965	15.9204	15.5872	15.8723	15.9533	16.3239	16.3594	16.0732	16.2048	15.8802	16.5832	16.275	15.3771		14.3852	15.7047	14.356	14.7214	14.1413	15.1744	12.8821	13.6994	13.9256	14.718	15.5106	15.8566	16.0194	16.01	15.963	15.7091	16.2324	16.198	14.5968	16.2087	16.3906	16.6298	16.4182	16.475	16.544
1192.01	16.985	16.1915	16.8295	17.1641	16.4322	16.9368	16.9752	17.0592	16.328	14.3281	15.834	15.9588	15.6308	15.9186	16.0063	16.3657	16.399	16.1157	16.2418	15.922	16.6279	16.3168	15.4154		14.4221	15.7387	14.3826	14.7647	14.1764	15.215	12.9149	13.7397	13.9633	14.7416	15.5516	15.9048	16.0662	16.0491	16.0053	15.7522	16.2787	16.2309	14.6419	16.2465	16.4254	16.6733	16.4746	16.5068	16.5819
1193.94	17.0351	16.249	16.893	17.2216	16.4888	17.0044	17.034	17.1216	16.3751	14.3758	15.8876	16.0244	15.6928	15.9772	16.0669	16.4258	16.4521	16.1729	16.3043	15.9769	16.6759	16.363	15.4623		14.4679	15.798	14.4213	14.7925	14.2203	15.2667	12.9623	13.7861	14.0122	14.7885	15.6144	15.9533	16.1143	16.1124	16.0566	15.8052	16.3341	16.2814	14.6865	16.2773	16.4761	16.7409	16.5316	16.556	16.6422
1195.87	17.0591	16.2846	16.9362	17.2739	16.5408	17.0499	17.068	17.1614	16.3999	14.4063	15.9193	16.0652	15.7305	16.0237	16.1081	16.4659	16.4916	16.2166	16.3454	16.0108	16.7067	16.4073	15.5007		14.4996	15.8407	14.4546	14.8153	14.251	15.298	12.9865	13.8113	14.0416	14.8283	15.6511	15.977	16.1477	16.1602	16.0952	15.8475	16.3669	16.3146	14.7119	16.3157	16.5225	16.7758	16.571	16.5989	16.6939
1197.79	17.1049	16.3263	16.9773	17.3428	16.5941	17.108	17.1302	17.2188	16.4518	14.4547	15.9653	16.112	15.7687	16.0794	16.1756	16.5156	16.5508	16.2714	16.3966	16.062	16.7643	16.4639	15.5523		14.5435	15.8661	14.5074	14.8809	14.2932	15.3363	13.0206	13.8536	14.0862	14.8727	15.6945	16.0296	16.198	16.207	16.1456	15.9046	16.4168	16.3668	14.7609	16.3823	16.566	16.8337	16.6265	16.6533	16.7502
1199.72	17.1634	16.3631	17.0085	17.3833	16.6242	17.1506	17.1821	17.2686	16.5017	14.4906	16.0075	16.1472	15.7924	16.1092	16.2134	16.5468	16.5866	16.3012	16.4333	16.1033	16.8063	16.4973	15.5835		14.5767	15.8834	14.542	14.924	14.3252	15.3661	13.0462	13.8815	14.1203	14.9055	15.7244	16.0698	16.23	16.2325	16.1872	15.9354	16.453	16.4119	14.7918	16.4206	16.5998	16.8738	16.6612	16.689	16.783
1201.65	17.2384	16.4074	17.0603	17.4409	16.6642	17.2102	17.2318	17.3298	16.5596	14.5325	16.0531	16.1822	15.8453	16.159	16.2657	16.5879	16.6378	16.3451	16.479	16.1507	16.8534	16.5427	15.6246		14.6148	15.9288	14.5741	14.9706	14.3649	15.4119	13.0825	13.9238	14.164	14.9529	15.772	16.1022	16.2816	16.2733	16.2422	15.972	16.4993	16.459	14.824	16.4584	16.6585	16.9143	16.7112	16.7397	16.8295
1203.58	17.2857	16.4267	17.0931	17.4674	16.7028	17.246	17.2663	17.3625	16.6045	14.5543	16.0776	16.206	15.8798	16.1915	16.3201	16.6234	16.6787	16.3774	16.5101	16.1776	16.8952	16.5713	15.6579		14.6402	15.9608	14.6031	14.9946	14.3919	15.4462	13.1049	13.9482	14.1919	14.9805	15.8081	16.132	16.3155	16.3055	16.2757	15.9911	16.5311	16.4868	14.8457	16.4849	16.691	16.9497	16.7548	16.776	16.8672
1205.51	17.3206	16.4801	17.1335	17.5148	16.7651	17.296	17.3078	17.4062	16.6535	14.5916	16.1189	16.2639	15.9188	16.2313	16.3571	16.6746	16.726	16.4252	16.5583	16.2272	16.9446	16.6146	15.7032		14.6795	16.0003	14.6452	15.0204	14.4345	15.4909	13.1378	13.9839	14.2271	15.022	15.8553	16.1825	16.3634	16.3485	16.3186	16.0354	16.5712	16.5322	14.8976	16.5167	16.7298	16.9963	16.8026	16.8144	16.92
1207.44	17.3261	16.5175	17.1752	17.5505	16.811	17.3347	17.3333	17.4431	16.686	14.6201	16.149	16.2972	15.9493	16.2599	16.3929	16.7005	16.7553	16.4573	16.5871	16.2636	16.9728	16.6438	15.7267		14.702	16.0375	14.6716	15.0355	14.4572	15.5177	13.1589	14.0074	14.2473	15.0567	15.8881	16.198	16.3955	16.3796	16.342	16.0766	16.5996	16.5655	14.9203	16.5461	16.7694	17.0298	16.8301	16.8436	16.9507
1209.37	17.3567	16.5718	17.2325	17.5975	16.8596	17.3857	17.385	17.4935	16.7307	14.6599	16.1912	16.3355	15.9934	16.3022	16.453	16.7459	16.7995	16.4989	16.6364	16.3065	17.0229	16.6881	15.7734		14.7368	16.1001	14.7122	15.0869	14.4894	15.5536	13.195	14.0435	14.2843	15.104	15.9266	16.2251	16.4302	16.4201	16.3843	16.121	16.6444	16.6101	14.9466	16.6132	16.8179	17.0789	16.8765	16.9055	16.9933
1211.3	17.3929	16.6106	17.245	17.6358	16.9109	17.4165	17.4219	17.5205	16.7472	14.6844	16.218	16.3586	16.0107	16.3141	16.4748	16.7764	16.8212	16.5289	16.6685	16.3334	17.056	16.7123	15.8034		14.7631	16.1337	14.7355	15.1158	14.5088	15.5762	13.2159	14.0633	14.3046	15.1273	15.9456	16.2524	16.4506	16.4519	16.415	16.1485	16.6694	16.6345	14.9657	16.6427	16.8431	17.1025	16.9049	16.9416	17.02
1213.23	17.4353	16.6488	17.2801	17.6844	16.9602	17.4571	17.4546	17.5586	16.7756	14.7212	16.2536	16.4069	16.0515	16.3377	16.5251	16.8129	16.8624	16.5704	16.7063	16.3722	17.0905	16.7508	15.8294		14.8076	16.1839	14.7655	15.13	14.5428	15.6117	13.2485	14.091	14.3383	15.1632	15.9824	16.29	16.486	16.4965	16.4471	16.1871	16.7072	16.6677	15.0025	16.6672	16.8833	17.1446	16.9457	16.9768	17.0593
1215.15	17.4668	16.6717	17.3164	17.7177	16.9679	17.4814	17.4795	17.5832	16.7949	14.7417	16.2776	16.4406	16.0822	16.3743	16.5565	16.8378	16.8905	16.5903	16.7293	16.3957	17.1121	16.7778	15.8457		14.8348	16.194	14.7877	15.1454	14.5718	15.6349	13.2648	14.108	14.3602	15.1817	16.0055	16.3197	16.5093	16.5246	16.4631	16.2013	16.7342	16.695	15.0233	16.689	16.9082	17.1794	16.9693	16.9865	17.0865
1217.08	17.5263	16.7077	17.3595	17.7508	17.0056	17.5222	17.5343	17.6308	16.8271	14.7676	16.3132	16.4609	16.1192	16.426	16.5871	16.8701	16.926	16.625	16.7703	16.434	17.1372	16.8116	15.8786		14.8633	16.2113	14.8175	15.2002	14.6012	15.6598	13.2879	14.1404	14.394	15.211	16.0446	16.3588	16.5465	16.5566	16.4969	16.2322	16.7681	16.7316	15.0534	16.7169	16.9445	17.2089	17.0067	17.0126	17.128
1219.01	17.5549	16.7322	17.3696	17.7672	17.0367	17.5435	17.5517	17.662	16.8654	14.7855	16.3306	16.4759	16.1363	16.4428	16.6224	16.8853	16.9513	16.6438	16.7936	16.4535	17.1536	16.8387	15.8941		14.8794	16.228	14.8302	15.2216	14.6096	15.677	13.2993	14.1627	14.41	15.2251	16.0613	16.3776	16.5657	16.5708	16.5209	16.2621	16.7916	16.7462	15.0813	16.7347	16.9591	17.2335	17.0319	17.0402	17.1551
1220.94	17.5871	16.7829	17.3976	17.8138	17.0811	17.5848	17.5864	17.7042	16.9222	14.823	16.3632	16.5051	16.1801	16.4768	16.6619	16.9168	16.9903	16.682	16.8269	16.4857	17.1862	16.8705	15.9264		14.9031	16.2673	14.8654	15.2465	14.6355	15.7107	13.32	14.1866	14.44	15.2579	16.0976	16.4108	16.5972	16.5997	16.5585	16.2977	16.826	16.7805	15.121	16.7634	16.9923	17.2821	17.0659	17.0913	17.1923
1222.87	17.6108	16.8013	17.4256	17.8477	17.1038	17.6184	17.6214	17.7317	16.9546	14.8445	16.3848	16.5199	16.2011	16.4931	16.6752	16.9386	17.0072	16.7079	16.8475	16.5106	17.201	16.8848	15.95		14.9189	16.2912	14.8849	15.2513	14.6508	15.7304	13.3312	14.1965	14.4574	15.2773	16.1197	16.4194	16.6201	16.6106	16.5758	16.3084	16.8438	16.8031	15.1401	16.7951	17.0293	17.3098	17.0888	17.1192	17.2112
1224.8	17.6407	16.8249	17.4537	17.8826	17.1312	17.6621	17.6561	17.7662	16.9861	14.8724	16.4099	16.5598	16.2195	16.5204	16.728	16.9806	17.039	16.7414	16.8864	16.5452	17.232	16.9193	15.9821		14.9474	16.3095	14.9114	15.2747	14.6796	15.7678	13.3513	14.2222	14.4842	15.3034	16.1437	16.4357	16.6458	16.6355	16.6014	16.3421	16.8727	16.8198	15.1628	16.8339	17.0665	17.3415	17.1271	17.1489	17.2451
1226.73	17.6535	16.8398	17.4714	17.899	17.1512	17.682	17.6827	17.7824	16.9939	14.8834	16.4239	16.5786	16.2416	16.5486	16.747	16.9926	17.0584	16.7587	16.9017	16.5612	17.2542	16.9479	16.0017		14.9558	16.3293	14.9169	15.2957	14.702	15.7838	13.3632	14.2332	14.4993	15.3136	16.1556	16.4581	16.6627	16.6627	16.6196	16.3596	16.8878	16.8328	15.1643	16.838	17.0801	17.35	17.1422	17.1741	17.2695
1228.66	17.6886	16.8715	17.505	17.9361	17.1991	17.7195	17.7284	17.8134	17.0304	14.9083	16.4567	16.6026	16.2792	16.5734	16.7726	17.0166	17.0867	16.7902	16.9305	16.5905	17.2777	16.9724	16.0255		14.9776	16.3606	14.9401	15.3322	14.7267	15.8161	13.3889	14.2631	14.5251	15.3422	16.1915	16.4939	16.6922	16.6935	16.6486	16.3749	16.9111	16.8673	15.1913	16.8564	17.1091	17.3772	17.1735	17.2059	17.3026
1230.58	17.7271	16.8963	17.5252	17.954	17.2225	17.7409	17.7378	17.8379	17.0493	14.917	16.478	16.6185	16.2868	16.5878	16.807	17.0292	17.1041	16.8053	16.9493	16.6075	17.2937	16.9773	16.0331		14.9888	16.3704	14.956	15.3503	14.7338	15.8314	13.3953	14.2742	14.5328	15.3553	16.2101	16.509	16.707	16.7051	16.6669	16.3876	16.9252	16.8872	15.2089	16.8754	17.1212	17.3911	17.1892	17.2109	17.3171
1232.51	17.7683	16.9142	17.5636	17.983	17.2432	17.7762	17.7619	17.8769	17.0681	14.9441	16.502	16.6536	16.3016	16.6158	16.8327	17.0491	17.1347	16.833	16.9866	16.6357	17.3324	17.0068	16.0572		15.0109	16.4002	14.9809	15.3548	14.7581	15.8466	13.4152	14.2925	14.5554	15.3814	16.2335	16.5275	16.7346	16.7345	16.6987	16.4177	16.9536	16.9187	15.2361	16.9211	17.1519	17.4236	17.2103	17.2343	17.3441
1234.44	17.7741	16.924	17.5774	17.9895	17.2599	17.7959	17.7859	17.8829	17.0733	14.9625	16.5054	16.668	16.3152	16.6216	16.8438	17.0651	17.154	16.8542	17.0001	16.6451	17.3542	17.0306	16.0713		15.029	16.4169	14.9873	15.363	14.7706	15.862	13.4223	14.3058	14.5661	15.3921	16.251	16.541	16.7436	16.7496	16.706	16.4294	16.9709	16.9313	15.244	16.9341	17.1781	17.4435	17.2226	17.2519	17.3553
1236.37	17.7891	16.9604	17.6152	18.0205	17.2918	17.8254	17.8306	17.9094	17.1029	14.9904	16.5302	16.689	16.3475	16.6367	16.8884	17.0956	17.1863	16.8818	17.0282	16.6747	17.382	17.0596	16.0983		15.0589	16.4389	15.0136	15.3946	14.7885	15.8911	13.4453	14.3308	14.5891	15.418	16.2836	16.5632	16.7619	16.778	16.7251	16.457	16.9977	16.9503	15.2653	16.9408	17.213	17.4731	17.259	17.2908	17.38
1238.3	17.8128	16.9724	17.6325	18.0515	17.2923	17.8381	17.8462	17.9327	17.1277	15.0044	16.5517	16.7077	16.3617	16.651	16.9036	17.111	17.1969	16.8897	17.0426	16.6893	17.4031	17.0665	16.118		15.067	16.4452	15.0296	15.3972	14.7965	15.9053	13.4541	14.3393	14.5982	15.4314	16.296	16.5782	16.7749	16.7933	16.7419	16.4729	17.0125	16.9595	15.2766	16.9555	17.2206	17.4837	17.2712	17.3017	17.3957
1240.23	17.8604	16.9907	17.6434	18.095	17.3122	17.869	17.8605	17.9643	17.1597	15.0321	16.583	16.7379	16.389	16.6819	16.9399	17.1411	17.2225	16.9215	17.0706	16.714	17.4358	17.0849	16.1418		15.0873	16.4726	15.0481	15.4163	14.824	15.9284	13.4713	14.3598	14.6196	15.4553	16.319	16.6037	16.8028	16.8157	16.7735	16.4988	17.0328	16.9838	15.2898	16.984	17.2396	17.5045	17.2929	17.3222	17.4234
1242.16	17.8761	17.0192	17.6514	18.1172	17.3236	17.8885	17.8893	17.9843	17.1658	15.0421	16.6008	16.7471	16.4048	16.6926	16.961	17.1466	17.2358	16.9375	17.0915	16.7295	17.4505	17.0976	16.1458		15.0965	16.4905	15.0554	15.4411	14.8355	15.9364	13.4746	14.3665	14.6321	15.4689	16.3295	16.6125	16.8217	16.8234	16.7875	16.5067	17.0404	17	15.2974	16.9975	17.2501	17.5249	17.3095	17.3286	17.4401
1244.09	17.8881	17.0481	17.685	18.134	17.3646	17.9144	17.9118	18.0072	17.1933	15.0545	16.6186	16.7625	16.4243	16.7173	16.9694	17.1666	17.2592	16.9576	17.1154	16.7551	17.4678	17.1223	16.1672		15.1123	16.5126	15.0749	15.4594	14.8508	15.9568	13.4897	14.3871	14.6561	15.4946	16.3595	16.6403	16.8376	16.8453	16.8104	16.5238	17.0609	17.0265	15.3124	17.0012	17.2748	17.5532	17.3415	17.356	17.4702
1246.02	17.8963	17.0502	17.6932	18.1378	17.398	17.9303	17.9207	18.0124	17.2094	15.0597	16.6194	16.7713	16.4292	16.7259	16.9862	17.1789	17.2724	16.966	17.1243	16.7625	17.4794	17.1387	16.1764		15.1188	16.5164	15.0811	15.4587	14.8556	15.9634	13.4967	14.3942	14.6623	15.5077	16.3743	16.6456	16.8408	16.8519	16.8162	16.5353	17.0748	17.035	15.3248	17.008	17.282	17.5609	17.3557	17.3748	17.4854
1247.94	17.9275	17.0653	17.7047	18.1614	17.4287	17.9585	17.9602	18.0399	17.2315	15.082	16.6431	16.7991	16.4564	16.7535	17.0199	17.1981	17.298	16.9908	17.1457	16.7873	17.4996	17.1623	16.1937		15.1361	16.5466	15.099	15.4671	14.8727	15.9873	13.5158	14.4085	14.6804	15.5302	16.395	16.6549	16.8714	16.8742	16.8329	16.5613	17.0989	17.0519	15.3462	17.0386	17.3005	17.5845	17.3815	17.4018	17.5081
1249.87	17.9481	17.0705	17.7248	18.1779	17.4287	17.9627	17.9658	18.0591	17.2388	15.0879	16.6572	16.8139	16.4743	16.7791	17.0215	17.2035	17.3064	17.0004	17.1532	16.799	17.4987	17.1684	16.201		15.1414	16.5604	15.1045	15.476	14.8757	15.9956	13.5214	14.4156	14.6924	15.5391	16.4013	16.6624	16.8844	16.891	16.8384	16.5759	17.1052	17.0649	15.3476	17.0558	17.315	17.591	17.388	17.4192	17.5131
1251.8	17.9604	17.0892	17.763	18.2231	17.451	17.9785	17.9626	18.0814	17.2672	15.1076	16.6698	16.8332	16.4865	16.804	17.0536	17.218	17.3289	17.0187	17.1729	16.8209	17.5059	17.1779	16.2182		15.1586	16.5691	15.1193	15.4919	14.8964	16.0104	13.5355	14.4307	14.7124	15.5564	16.4283	16.6905	16.8987	16.9083	16.8561	16.5947	17.1189	17.0815	15.3613	17.0919	17.3445	17.6054	17.4074	17.4403	17.5333
1253.73	17.9498	17.0987	17.762	18.2359	17.4595	17.9769	17.9681	18.0781	17.2659	15.1071	16.6727	16.8309	16.4841	16.8003	17.065	17.224	17.3316	17.025	17.1793	16.8232	17.5055	17.1799	16.2286		15.1611	16.562	15.1256	15.4946	14.9024	16.0218	13.5348	14.4294	14.7085	15.5553	16.433	16.7083	16.902	16.9072	16.8611	16.6016	17.1262	17.0802	15.3587	17.0768	17.3483	17.6081	17.4157	17.4393	17.5404
1255.66	17.9626	17.1267	17.763	18.2479	17.4842	17.991	17.9935	18.0858	17.2614	15.1123	16.691	16.8442	16.4921	16.8112	17.0678	17.2401	17.3452	17.045	17.1962	16.8355	17.515	17.1944	16.2451		15.1749	16.5826	15.1368	15.5277	14.9147	16.0435	13.5432	14.4453	14.7203	15.5669	16.4434	16.7331	16.9208	16.9187	16.88	16.618	17.1444	17.0903	15.3692	17.0794	17.3624	17.6236	17.4316	17.4506	17.5543
1257.59	17.9753	17.1403	17.7683	18.2554	17.4941	17.9914	17.9824	18.0804	17.2536	15.1044	16.6933	16.8421	16.4906	16.7993	17.0841	17.2378	17.3481	17.0497	17.2035	16.8379	17.5121	17.1983	16.2427		15.1761	16.6008	15.1328	15.5308	14.9164	16.0448	13.5432	14.4518	14.7218	15.5726	16.4518	16.7324	16.9326	16.9257	16.8871	16.6257	17.1477	17.0963	15.3766	17.0847	17.3778	17.6279	17.4376	17.4577	17.5617
1259.52	17.9879	17.1495	17.7967	18.2707	17.5178	18.0038	17.9894	18.0971	17.2816	15.1158	16.7067	16.8474	16.506	16.7979	17.096	17.254	17.364	17.0627	17.2202	16.8509	17.5173	17.2151	16.2494		15.1863	16.6068	15.1498	15.5433	14.924	16.053	13.5567	14.4643	14.7322	15.5914	16.4717	16.7396	16.9513	16.944	16.903	16.6427	17.1602	17.1117	15.3929	17.1	17.3981	17.6553	17.4571	17.4736	17.5815
1261.45	17.989	17.1461	17.8132	18.2701	17.5317	18.0155	17.9981	18.1055	17.2984	15.1249	16.7113	16.8487	16.5154	16.808	17.1023	17.2538	17.3695	17.0619	17.223	16.8568	17.5245	17.2181	16.2516		15.1889	16.6045	15.1595	15.5498	14.9254	16.0591	13.5528	14.4608	14.737	15.5901	16.4772	16.7314	16.9526	16.9509	16.9123	16.6414	17.1659	17.1155	15.3983	17.1166	17.4033	17.6595	17.4627	17.4724	17.5859
1263.37	18.0224	17.1703	17.8238	18.2973	17.5624	18.0523	18.0234	18.1342	17.3211	15.1596	16.7317	16.8807	16.5414	16.8495	17.1485	17.2748	17.3938	17.0878	17.2495	16.8845	17.5577	17.246	16.275		15.2137	16.6262	15.1772	15.5674	14.949	16.079	13.5704	14.4801	14.7631	15.6155	16.502	16.7516	16.9682	16.972	16.9378	16.6612	17.188	17.1412	15.4199	17.1482	17.4341	17.6741	17.484	17.501	17.6106
1265.3	18.0332	17.1908	17.8293	18.3073	17.5772	18.0765	18.0536	18.1521	17.3363	15.1777	16.7437	16.9003	16.5573	16.8625	17.1601	17.2895	17.4056	17.1049	17.2576	16.8999	17.5747	17.262	16.2867		15.2275	16.6329	15.1812	15.5741	14.9648	16.0825	13.5778	14.4891	14.776	15.6323	16.5175	16.7685	16.9766	16.9694	16.9448	16.6676	17.2029	17.1527	15.4284	17.1499	17.4416	17.6892	17.4984	17.5329	17.6306
1267.23	18.0517	17.2289	17.8705	18.3297	17.5968	18.1138	18.0943	18.1936	17.3669	15.206	16.7692	16.9255	16.5878	16.8901	17.1915	17.3144	17.4365	17.1338	17.289	16.9336	17.6046	17.2877	16.3108		15.2403	16.6552	15.2061	15.6042	14.9849	16.1029	13.5952	14.5108	14.8	15.6528	16.5416	16.7903	17.0007	16.9844	16.961	16.6788	17.2279	17.1716	15.4381	17.1786	17.4637	17.7213	17.5235	17.5591	17.6567
1269.16	18.0604	17.2447	17.8883	18.3422	17.6004	18.1314	18.1026	18.2188	17.3888	15.2175	16.7827	16.935	16.6052	16.9038	17.2208	17.3281	17.4498	17.1472	17.3061	16.9482	17.6248	17.2982	16.3197		15.2408	16.6741	15.2165	15.6181	14.9881	16.109	13.603	14.5174	14.8061	15.6577	16.5488	16.8041	17.0107	17.001	16.9692	16.6864	17.2343	17.181	15.4245	17.1947	17.4714	17.7395	17.5303	17.5666	17.6623
1271.09	18.0746	17.2555	17.8954	18.3674	17.6127	18.1555	18.136	18.2454	17.4085	15.2314	16.8007	16.9459	16.6245	16.9303	17.2289	17.3509	17.4682	17.164	17.3226	16.9645	17.6468	17.3134	16.3363		15.2566	16.6916	15.2326	15.6125	14.9996	16.1252	13.6133	14.5302	14.8194	15.676	16.5644	16.8165	17.0269	17.023	16.9876	16.7086	17.2459	17.1961	15.4337	17.2083	17.4875	17.7552	17.5444	17.5755	17.6841
1273.02	18.0913	17.2546	17.8925	18.3714	17.623	18.1604	18.1591	18.2518	17.411	15.2305	16.7949	16.9497	16.6265	16.9486	17.2333	17.3549	17.4725	17.1707	17.325	16.9666	17.6524	17.3206	16.341		15.2577	16.6789	15.2309	15.6006	14.9999	16.1304	13.6101	14.5295	14.8184	15.6764	16.5637	16.8126	17.0288	17.0293	16.9917	16.7142	17.2458	17.2034	15.444	17.2086	17.488	17.7518	17.5512	17.5727	17.6893
1274.95	18.1284	17.2703	17.9162	18.3821	17.6494	18.1854	18.1771	18.2712	17.437	15.2447	16.8104	16.9792	16.636	16.9604	17.2644	17.3736	17.4929	17.1907	17.3458	16.9841	17.6762	17.3344	16.3593		15.2739	16.6808	15.2398	15.6285	15.0159	16.1476	13.6248	14.5466	14.8322	15.6897	16.5764	16.8293	17.0414	17.0456	17.0106	16.7341	17.2601	17.2216	15.4723	17.2278	17.5102	17.762	17.5715	17.5944	17.7074
1276.88	18.1263	17.2699	17.9331	18.3791	17.6534	18.1933	18.1798	18.2757	17.4377	15.246	16.8162	16.984	16.6409	16.945	17.2684	17.3694	17.4986	17.1928	17.3465	16.9879	17.6806	17.3352	16.3624		15.2776	16.7001	15.2372	15.6325	15.0194	16.154	13.6241	14.5461	14.8357	15.6928	16.5784	16.8345	17.0458	17.0484	17.0227	16.7411	17.2667	17.2223	15.4838	17.2328	17.52	17.7716	17.5725	17.5947	17.7172
1278.81	18.1267	17.2861	17.9551	18.3942	17.6734	18.2119	18.1925	18.2932	17.4605	15.2634	16.8271	16.9904	16.6615	16.9653	17.2917	17.377	17.5162	17.2133	17.3669	17.0042	17.6886	17.3496	16.3762		15.2918	16.7224	15.2467	15.6398	15.0272	16.1662	13.6332	14.5543	14.8485	15.7114	16.5987	16.8484	17.0621	17.0647	17.0406	16.7589	17.2838	17.2381	15.5029	17.2446	17.5311	17.7962	17.5914	17.6063	17.7339
1280.73	18.1218	17.2812	17.9432	18.4078	17.6765	18.2141	18.195	18.2987	17.4702	15.2652	16.8264	16.9927	16.6692	16.9716	17.2962	17.379	17.5155	17.2107	17.3691	17.0076	17.6881	17.3525	16.3756		15.2946	16.709	15.2489	15.6476	15.0224	16.1615	13.6323	14.5507	14.8446	15.7162	16.6007	16.854	17.0663	17.0676	17.0404	16.7557	17.2831	17.2422	15.4914	17.2385	17.5306	17.8037	17.5961	17.6139	17.7345
1282.66	18.1342	17.301	17.9513	18.4404	17.6928	18.2363	18.2186	18.3198	17.4948	15.2741	16.8434	17.0089	16.6842	16.9884	17.306	17.3981	17.5319	17.2222	17.3905	17.0236	17.6993	17.3703	16.3821		15.3107	16.7196	15.2565	15.6738	15.0398	16.1788	13.6403	14.5595	14.8595	15.7268	16.6121	16.8623	17.0818	17.0841	17.052	16.7593	17.2964	17.2573	15.4791	17.2476	17.5483	17.8161	17.6121	17.6524	17.7485
1284.59	18.139	17.3095	17.9577	18.4454	17.7062	18.2531	18.2369	18.3284	17.5031	15.2779	16.8489	17.0098	16.68	16.9891	17.3245	17.4104	17.5417	17.2306	17.4056	17.0308	17.7015	17.3746	16.3791		15.3104	16.7413	15.26	15.6761	15.043	16.1817	13.6388	14.5618	14.8649	15.7285	16.6223	16.8531	17.0788	17.0833	17.0546	16.763	17.3004	17.2557	15.4719	17.2558	17.5619	17.8178	17.6101	17.6609	17.7499
1286.52	18.1536	17.3294	17.9742	18.4541	17.7104	18.2742	18.2564	18.3441	17.5134	15.2988	16.8677	17.029	16.6916	17.0034	17.3433	17.4272	17.5586	17.2523	17.4245	17.0488	17.7107	17.3854	16.3921		15.3163	16.7725	15.2774	15.6719	15.0521	16.1935	13.6511	14.5772	14.8773	15.7411	16.6425	16.8643	17.0918	17.0958	17.0697	16.7816	17.3121	17.2634	15.4944	17.2743	17.5756	17.8371	17.6284	17.6737	17.7664
1288.45	18.1468	17.3283	17.9673	18.4474	17.71	18.264	18.2352	18.3387	17.5073	15.2957	16.8596	17.025	16.696	17.0024	17.3324	17.4159	17.5562	17.2479	17.417	17.0408	17.6966	17.381	16.3902		15.3066	16.7635	15.2666	15.6484	15.0477	16.1874	13.6434	14.5706	14.8734	15.7348	16.6363	16.8643	17.0933	17.0945	17.0673	16.772	17.3112	17.2565	15.4974	17.2621	17.5696	17.8324	17.6274	17.6723	17.7657
1290.38	18.166	17.3378	17.9802	18.4701	17.7341	18.2721	18.23	18.3505	17.5024	15.3079	16.8615	17.0368	16.7133	17.0109	17.3559	17.428	17.574	17.2586	17.4267	17.0561	17.7067	17.3973	16.4011		15.3104	16.7618	15.2714	15.6501	15.0578	16.1956	13.6507	14.579	14.8853	15.7429	16.6443	16.8799	17.1075	17.1013	17.0779	16.7786	17.3217	17.2701	15.5016	17.2658	17.5831	17.8429	17.6354	17.6843	17.7835
1292.31	18.1784	17.3348	17.9891	18.4716	17.7274	18.2739	18.234	18.3492	17.4929	15.3062	16.8624	17.042	16.7043	17.0043	17.3521	17.4243	17.5748	17.2613	17.4287	17.059	17.7131	17.3945	16.3982		15.3092	16.7589	15.2736	15.6412	15.0562	16.1991	13.6477	14.5785	14.8859	15.7418	16.646	16.8888	17.1069	17.0981	17.0775	16.7867	17.322	17.2752	15.5138	17.2725	17.5845	17.8351	17.6365	17.6807	17.7833
1294.24	18.1928	17.3547	18.0021	18.4893	17.7374	18.2918	18.2587	18.3696	17.5258	15.319	16.8744	17.0675	16.7043	17.0136	17.3684	17.4348	17.5862	17.2752	17.4417	17.0734	17.7234	17.4031	16.4104		15.3252	16.7677	15.2885	15.6688	15.064	16.216	13.659	14.5879	14.8982	15.7554	16.6608	16.9033	17.1209	17.1094	17.0897	16.7973	17.3365	17.2911	15.5335	17.2976	17.5914	17.8425	17.6527	17.6979	17.7981
1296.16	18.1892	17.347	17.9962	18.4936	17.7364	18.2928	18.2585	18.3711	17.5477	15.3137	16.8701	17.061	16.7062	17.0183	17.3806	17.4283	17.5798	17.2674	17.4389	17.0694	17.7196	17.4031	16.405		15.3211	16.7659	15.2871	15.6681	15.0587	16.2073	13.6497	14.5813	14.8915	15.7452	16.658	16.8896	17.1178	17.1041	17.083	16.7926	17.3305	17.2869	15.5186	17.2925	17.5886	17.8378	17.6486	17.698	17.7984
1298.09	18.207	17.3549	18.0047	18.5062	17.7556	18.3095	18.2803	18.3876	17.5562	15.3239	16.8819	17.067	16.7181	17.0404	17.3864	17.4342	17.5917	17.278	17.4509	17.083	17.7299	17.4141	16.4084		15.3256	16.7769	15.2949	15.6779	15.0665	16.218	13.6531	14.591	14.896	15.7514	16.6687	16.8916	17.1258	17.1108	17.0953	16.8089	17.3347	17.2936	15.5111	17.2895	17.6098	17.8509	17.6643	17.7124	17.8106
1300.02	18.2086	17.3548	17.9993	18.5105	17.7698	18.311	18.295	18.3879	17.5378	15.3229	16.8791	17.0696	16.7126	17.0323	17.3873	17.4394	17.5942	17.2761	17.4486	17.0801	17.7322	17.4121	16.4032		15.3211	16.7782	15.2896	15.6894	15.0604	16.2214	13.6492	14.5846	14.8907	15.7525	16.6673	16.8869	17.1244	17.1085	17.0958	16.8106	17.3333	17.2885	15.4999	17.2782	17.6082	17.8503	17.668	17.7072	17.8065
1301.95	18.22	17.3628	18.0191	18.5265	17.7891	18.3274	18.2917	18.3994	17.5611	15.3318	16.8822	17.0757	16.7218	17.0435	17.4089	17.4539	17.6081	17.2877	17.4613	17.0893	17.7439	17.4168	16.4158		15.329	16.793	15.2897	15.6935	15.0646	16.2225	13.6544	14.5935	14.8982	15.7668	16.6802	16.8956	17.1322	17.1226	17.1049	16.8196	17.3452	17.2994	15.514	17.2922	17.6192	17.8636	17.6802	17.7149	17.8137
1303.88	18.2129	17.3575	18.016	18.5244	17.7797	18.3245	18.2793	18.4015	17.5766	15.3243	16.8787	17.0692	16.7263	17.0496	17.3988	17.4486	17.6055	17.2892	17.4599	17.0854	17.7442	17.4114	16.4148		15.3248	16.7847	15.2797	15.674	15.0616	16.2091	13.6481	14.5906	14.8949	15.7581	16.675	16.8954	17.1292	17.1267	17.1011	16.8088	17.3387	17.2973	15.5138	17.2994	17.6189	17.8622	17.6801	17.7186	17.8157
1305.81	18.2185	17.3637	18.025	18.5404	17.7831	18.338	18.2944	18.4155	17.5908	15.3345	16.89	17.0819	16.7407	17.061	17.4165	17.4583	17.6172	17.3066	17.4732	17.097	17.7602	17.42	16.4228		15.3364	16.7916	15.2877	15.6761	15.0752	16.2193	13.6591	14.5936	14.9054	15.7656	16.687	16.9056	17.135	17.1355	17.1094	16.807	17.3452	17.3066	15.5239	17.3093	17.632	17.8728	17.6919	17.7316	17.8319
1307.74	18.2177	17.3633	18.0193	18.542	17.7776	18.3354	18.2882	18.4103	17.5633	15.3309	16.8874	17.079	16.7286	17.0459	17.4147	17.4459	17.6099	17.3019	17.4684	17.0872	17.7583	17.4158	16.4139		15.3299	16.7778	15.2845	15.6782	15.067	16.2147	13.6549	14.5805	14.8987	15.7651	16.6832	16.8932	17.128	17.1272	17.1013	16.7908	17.3413	17.3016	15.528	17.2955	17.6248	17.8701	17.6761	17.7165	17.8288
1309.67	18.2219	17.3822	18.0424	18.5568	17.7975	18.3616	18.3027	18.4316	17.5719	15.3477	16.8953	17.0831	16.7355	17.0425	17.4188	17.4562	17.6293	17.3169	17.4851	17.1068	17.7693	17.4331	16.4228		15.3362	16.7856	15.292	15.6881	15.074	16.2283	13.666	14.5942	14.9127	15.7857	16.6943	16.9045	17.1432	17.1378	17.1131	16.8096	17.3538	17.3099	15.5384	17.302	17.6385	17.8862	17.6871	17.7364	17.8502
1311.59	18.2004	17.3835	18.0317	18.5579	17.8069	18.3643	18.3128	18.4371	17.5796	15.35	16.889	17.0761	16.7338	17.0216	17.4323	17.4586	17.6317	17.3183	17.4879	17.1084	17.7653	17.4319	16.4152		15.3345	16.7893	15.2856	15.6871	15.0698	16.2272	13.664	14.5899	14.9135	15.7839	16.692	16.908	17.1417	17.1244	17.1178	16.8041	17.3497	17.2963	15.5155	17.3011	17.6459	17.8794	17.6946	17.7331	17.8461
1313.52	18.2092	17.3882	18.0241	18.5633	17.8151	18.364	18.322	18.4422	17.5752	15.3511	16.9001	17.0744	16.7418	17.0271	17.4492	17.4666	17.6356	17.3201	17.4933	17.1103	17.7672	17.4287	16.4118		15.3356	16.7836	15.2852	15.6906	15.0711	16.227	13.659	14.5851	14.915	15.7863	16.6948	16.9069	17.1423	17.1225	17.116	16.8104	17.3474	17.2915	15.507	17.2986	17.6509	17.8799	17.7002	17.7266	17.8426
1315.45	18.2175	17.3981	18.0271	18.5598	17.8095	18.374	18.3374	18.4499	17.575	15.3446	16.9048	17.0764	16.7377	17.0387	17.4391	17.4703	17.6353	17.3157	17.4937	17.1136	17.7603	17.4282	16.4122		15.3282	16.7822	15.2826	15.6869	15.0707	16.2259	13.6515	14.5812	14.9155	15.7924	16.6986	16.9015	17.1437	17.127	17.116	16.8189	17.3444	17.2888	15.5075	17.3027	17.6457	17.8905	17.7021	17.723	17.8461
1317.38	18.2157	17.3987	18.0198	18.5661	17.8274	18.3907	18.3524	18.4653	17.5994	15.3501	16.9072	17.084	16.7363	17.0419	17.456	17.477	17.6456	17.3295	17.5036	17.121	17.7618	17.4351	16.4272		15.3313	16.7952	15.2915	15.6883	15.0791	16.2295	13.6594	14.5875	14.9262	15.7948	16.7128	16.9127	17.1549	17.1294	17.1288	16.8222	17.3522	17.2886	15.5152	17.3096	17.653	17.9007	17.7126	17.7237	17.86
1319.31	18.2017	17.3635	17.9883	18.5531	17.8053	18.3607	18.3191	18.4382	17.58	15.3284	16.8814	17.0591	16.7182	17.0225	17.436	17.4495	17.6249	17.3082	17.478	17.0945	17.7389	17.4111	16.4139		15.3161	16.7766	15.2771	15.6807	15.0621	16.2091	13.6391	14.565	14.9041	15.7653	16.692	16.8977	17.1347	17.1115	17.108	16.8002	17.335	17.2678	15.5001	17.2956	17.6443	17.8817	17.6907	17.718	17.8399
1321.24	18.2237	17.3801	18.0013	18.5603	17.7956	18.3613	18.3252	18.4387	17.5729	15.3331	16.8794	17.0541	16.7258	17.0425	17.4337	17.4484	17.6281	17.3108	17.4797	17.1035	17.742	17.4132	16.4148		15.3199	16.7682	15.2837	15.6972	15.0599	16.2159	13.6381	14.572	14.9024	15.7733	16.6957	16.8848	17.134	17.1138	17.1074	16.8034	17.3368	17.28	15.5069	17.3006	17.6502	17.883	17.6917	17.7444	17.8373
1323.17	18.2194	17.3841	18.0074	18.5495	17.8023	18.3639	18.3193	18.4399	17.5748	15.3292	16.8756	17.0515	16.7242	17.0402	17.4368	17.445	17.6261	17.3116	17.4789	17.1032	17.7344	17.4122	16.4084		15.3171	16.7603	15.2749	15.682	15.0538	16.2121	13.6294	14.5724	14.8985	15.778	16.692	16.8739	17.1257	17.1154	17.102	16.7894	17.3306	17.2812	15.4923	17.2915	17.6402	17.8703	17.6844	17.7352	17.8309
1325.1	18.2104	17.3773	18.0217	18.5579	17.8168	18.3754	18.3265	18.4463	17.5854	15.3402	16.8888	17.0618	16.7264	17.0431	17.4421	17.4456	17.6341	17.3181	17.4837	17.1101	17.7355	17.4173	16.4075		15.3224	16.7708	15.2746	15.6741	15.0597	16.2204	13.6316	14.5756	14.9037	15.7796	16.6993	16.8843	17.1245	17.1265	17.1042	16.7953	17.3372	17.2903	15.491	17.2911	17.6356	17.8786	17.6868	17.7312	17.8388
1327.03	18.2072	17.3638	18.0214	18.5532	17.802	18.3709	18.3249	18.4372	17.5707	15.3355	16.8798	17.0571	16.7156	17.037	17.4328	17.4284	17.6279	17.3058	17.4781	17.1036	17.7266	17.4069	16.3932		15.3099	16.7511	15.2663	15.6579	15.0527	16.2117	13.6286	14.5711	14.893	15.7645	16.6931	16.8774	17.11	17.1137	17.0916	16.7908	17.328	17.2808	15.4817	17.278	17.6271	17.8754	17.6796	17.7152	17.8344
1328.95	18.2236	17.3714	18.0298	18.5601	17.8163	18.3746	18.3309	18.4402	17.5752	15.3365	16.8746	17.0541	16.7236	17.0391	17.4451	17.4294	17.6309	17.3085	17.4887	17.1088	17.7318	17.4055	16.3935		15.3118	16.75	15.2726	15.6529	15.0549	16.209	13.6291	14.5749	14.8939	15.7651	16.6968	16.8802	17.1111	17.1123	17.0926	16.7853	17.3264	17.2811	15.4803	17.2767	17.6308	17.8787	17.6864	17.724	17.8397
1330.88	18.2139	17.3496	18.0138	18.5531	17.8038	18.3636	18.3119	18.4326	17.5749	15.3236	16.8604	17.042	16.7133	17.0234	17.4288	17.4222	17.616	17.2987	17.4766	17.0974	17.7217	17.3943	16.383		15.3035	16.7449	15.2588	15.6493	15.0403	16.198	13.6133	14.5553	14.8812	15.7542	16.6845	16.8703	17.1006	17.1021	17.0814	16.7799	17.3154	17.2695	15.4656	17.2681	17.6191	17.861	17.6797	17.7204	17.8272
1332.81	18.2196	17.3501	18.0213	18.5618	17.8161	18.3778	18.322	18.4487	17.5927	15.3328	16.8638	17.055	16.7122	17.0258	17.4305	17.4418	17.6261	17.3073	17.486	17.1059	17.7242	17.4046	16.3907		15.3116	16.7591	15.262	15.6588	15.0435	16.2069	13.6162	14.5624	14.8878	15.7621	16.6928	16.8756	17.1104	17.106	17.0853	16.7869	17.3221	17.2745	15.4846	17.2805	17.6307	17.8654	17.6904	17.7259	17.8376
1334.74	18.2104	17.3721	18.0253	18.5607	17.8299	18.3969	18.3386	18.4616	17.6003	15.3421	16.8655	17.0596	16.7149	17.0135	17.4437	17.4498	17.6366	17.3193	17.4921	17.115	17.7281	17.4046	16.3877		15.3126	16.7521	15.262	15.6571	15.0467	16.2103	13.6175	14.5646	14.8957	15.7751	16.699	16.8733	17.1137	17.0976	17.0913	16.7765	17.3213	17.2656	15.4945	17.2858	17.6394	17.8844	17.6932	17.7168	17.8468
1336.67	18.1978	17.4031	18.0355	18.5836	17.858	18.4355	18.3672	18.4925	17.6209	15.3636	16.881	17.076	16.7398	17.0153	17.4675	17.4658	17.6617	17.3502	17.516	17.134	17.7465	17.4112	16.3974		15.3178	16.7461	15.2739	15.6796	15.0641	16.2229	13.6397	14.5652	14.9159	15.8084	16.7223	16.8845	17.1262	17.095	17.1149	16.7838	17.3296	17.2526	15.493	17.2923	17.6673	17.9127	17.7097	17.7303	17.872
1338.6	18.1268	17.3651	17.9667	18.562	17.8202	18.392	18.3406	18.4549	17.5832	15.3239	16.8435	17.0375	16.7122	16.976	17.4447	17.421	17.6231	17.3109	17.4778	17.0842	17.7157	17.3707	16.3635		15.2848	16.715	15.2436	15.6618	15.0348	16.1852	13.6095	14.5183	14.8856	15.7647	16.6862	16.8579	17.0921	17.0491	17.0855	16.7523	17.2929	17.1885	15.4537	17.2464	17.6352	17.8689	17.6634	17.6946	17.8352
1340.53	18.1145	17.3213	17.928	18.5272	17.7777	18.3312	18.2814	18.4038	17.5325	15.274	16.8077	17.0058	16.663	16.9487	17.4132	17.3695	17.5775	17.2609	17.4319	17.0427	17.6853	17.3354	16.3309		15.2528	16.6914	15.2102	15.616	14.9971	16.1455	13.5626	14.4844	14.843	15.7093	16.6381	16.8227	17.0562	17.0226	17.0403	16.7217	17.2579	17.1734	15.4167	17.2057	17.5806	17.8219	17.6194	17.6633	17.7842
1342.46	18.1611	17.3152	17.9562	18.5175	17.774	18.3308	18.2688	18.4032	17.5249	15.2783	16.8023	17.0053	16.656	16.9554	17.3934	17.3645	17.5776	17.2564	17.4348	17.0514	17.6869	17.34	16.3311		15.2476	16.6972	15.2027	15.5937	14.9885	16.1485	13.553	14.4979	14.8356	15.7089	16.6356	16.8117	17.0512	17.0363	17.0306	16.7364	17.2567	17.2016	15.4159	17.2148	17.576	17.8201	17.6301	17.6684	17.78
1344.38	18.18	17.3179	17.9763	18.5281	17.783	18.343	18.2855	18.4181	17.5371	15.293	16.8074	17.0079	16.6665	16.973	17.4037	17.376	17.5886	17.2637	17.4446	17.065	17.6931	17.3458	16.3396		15.2526	16.6972	15.2081	15.6017	14.9902	16.1563	13.5592	14.5116	14.8456	15.7182	16.6468	16.8077	17.0554	17.0535	17.0353	16.7447	17.2663	17.2165	15.4189	17.2313	17.593	17.8293	17.6432	17.6845	17.7883
1346.31	18.167	17.3118	17.9649	18.515	17.7716	18.3355	18.2694	18.4069	17.5376	15.2848	16.796	16.9957	16.6569	16.961	17.4007	17.3671	17.5778	17.2563	17.4327	17.0549	17.6772	17.3323	16.3277		15.2414	16.6837	15.1984	15.5902	14.9763	16.1388	13.5479	14.4982	14.835	15.7053	16.6374	16.7969	17.0441	17.039	17.0228	16.7195	17.2522	17.2046	15.4063	17.2172	17.5825	17.827	17.6336	17.6701	17.7778
1348.24	18.1593	17.319	17.9436	18.5079	17.7692	18.333	18.2642	18.4032	17.5439	15.2766	16.7944	16.9938	16.6627	16.9601	17.3869	17.3655	17.5731	17.2554	17.4322	17.0504	17.6678	17.3252	16.327		15.2383	16.6711	15.2003	15.5812	14.9707	16.1357	13.5461	14.4931	14.8291	15.7104	16.6344	16.7981	17.0394	17.0327	17.0199	16.7085	17.2435	17.1988	15.405	17.2049	17.5794	17.8253	17.6298	17.6698	17.7811
1350.17	18.1402	17.2974	17.9286	18.4903	17.7416	18.3112	18.2628	18.38	17.5285	15.2555	16.7748	16.969	16.6389	16.945	17.3726	17.3414	17.5514	17.2336	17.4173	17.027	17.6454	17.3074	16.3063		15.2211	16.6372	15.1818	15.5671	14.9521	16.1177	13.5278	14.4752	14.8069	15.6946	16.616	16.7757	17.0156	17.0173	16.999	16.6924	17.2232	17.1815	15.39	17.1826	17.5591	17.8003	17.6029	17.6485	17.7622
1352.1	18.1417	17.2922	17.9474	18.503	17.7444	18.3259	18.2782	18.39	17.5368	15.2657	16.7728	16.9641	16.6258	16.9427	17.3786	17.3436	17.558	17.2385	17.423	17.0327	17.6432	17.3162	16.3019		15.2189	16.6436	15.1782	15.5721	14.9585	16.1216	13.5279	14.4738	14.811	15.6975	16.6197	16.7762	17.0147	17.0224	16.9997	16.6905	17.2237	17.1796	15.3967	17.1786	17.563	17.8015	17.6086	17.6457	17.7663
1354.03	18.1105	17.273	17.9272	18.4792	17.7305	18.3091	18.2445	18.3748	17.5144	15.2463	16.7521	16.9392	16.6139	16.9209	17.3572	17.3247	17.5396	17.2208	17.4062	17.0171	17.6169	17.2943	16.2769		15.1959	16.6286	15.157	15.5537	14.9445	16.1024	13.5074	14.4495	14.7964	15.677	16.6022	16.7572	16.9977	17.0005	16.98	16.6672	17.2038	17.1504	15.3712	17.1588	17.5426	17.7851	17.5901	17.6247	17.7485
1355.96	18.1038	17.2681	17.9163	18.4669	17.7334	18.2983	18.2235	18.3652	17.495	15.232	16.7441	16.9271	16.6174	16.923	17.3637	17.311	17.529	17.2134	17.3978	17.0102	17.6023	17.2813	16.2654		15.1883	16.6146	15.148	15.5461	14.9309	16.0875	13.4968	14.4407	14.7865	15.6629	16.5973	16.7395	16.9934	16.9933	16.9676	16.6653	17.1953	17.1402	15.3467	17.1443	17.5367	17.7777	17.581	17.6135	17.7363
1357.89	18.1089	17.2634	17.9144	18.4724	17.7447	18.3066	18.2412	18.3673	17.4927	15.2353	16.7396	16.9222	16.6051	16.9178	17.3593	17.2981	17.5292	17.2099	17.3987	17.0108	17.596	17.2755	16.2621		15.1832	16.6119	15.1418	15.5461	14.9279	16.0797	13.4915	14.4392	14.785	15.6632	16.5982	16.7332	16.99	16.9835	16.9635	16.6629	17.1886	17.1344	15.3268	17.1391	17.533	17.7728	17.5805	17.6127	17.7298
1359.82	18.1191	17.2872	17.9272	18.5112	17.7695	18.3441	18.2866	18.4026	17.5342	15.2673	16.75	16.9472	16.6163	16.9123	17.3775	17.3165	17.5574	17.2307	17.4297	17.0378	17.6055	17.291	16.2764		15.1941	16.6443	15.1555	15.5545	14.9494	16.0975	13.5119	14.4556	14.8134	15.6901	16.6231	16.7631	17.0045	16.9821	16.988	16.6728	17.2007	17.1337	15.3367	17.1608	17.5578	17.7949	17.6046	17.6249	17.7523
1361.74	18.0411	17.2348	17.8413	18.4753	17.7122	18.2788	18.2358	18.3524	17.4805	15.2147	16.7021	16.9031	16.5722	16.8391	17.3401	17.2765	17.5058	17.1793	17.3719	16.9722	17.5514	17.2322	16.2242		15.1443	16.5924	15.111	15.5027	14.9066	16.0539	13.4683	14.3935	14.7716	15.6401	16.5699	16.7168	16.9516	16.915	16.942	16.6066	17.15	17.0575	15.2939	17.1003	17.5169	17.7409	17.5405	17.5691	17.7058
1363.67	18.0019	17.1685	17.7845	18.4091	17.6553	18.2084	18.1693	18.2857	17.4061	15.156	16.6637	16.8578	16.5228	16.8017	17.2794	17.2274	17.4447	17.1222	17.3071	16.9145	17.509	17.1796	16.1823		15.1002	16.5261	15.0667	15.4658	14.8514	16.0082	13.4159	14.3382	14.7119	15.5754	16.5063	16.6547	16.8976	16.8774	16.8911	16.5606	17.1004	17.0215	15.246	17.0491	17.4553	17.6862	17.4816	17.5328	17.6518
1365.6	18.0325	17.193	17.8142	18.4082	17.6747	18.2345	18.1871	18.298	17.4209	15.1714	16.6692	16.862	16.5275	16.8219	17.2825	17.2332	17.4544	17.1319	17.3217	16.9377	17.5193	17.1995	16.1896		15.1079	16.5361	15.0653	15.4599	14.8495	16.0093	13.4171	14.3573	14.7134	15.5905	16.5186	16.6585	16.9066	16.8999	16.89	16.579	17.107	17.0483	15.2588	17.0593	17.4593	17.699	17.5077	17.548	17.659
1367.53	18.0228	17.1999	17.8184	18.405	17.6774	18.2435	18.1736	18.2987	17.4197	15.1679	16.6669	16.8635	16.5213	16.8198	17.2886	17.2232	17.4547	17.1332	17.3249	16.9358	17.52	17.1951	16.1812		15.1001	16.5427	15.0607	15.4416	14.8479	16.0034	13.4154	14.3583	14.7144	15.5916	16.521	16.6561	16.906	16.8973	16.8837	16.5683	17.1018	17.0386	15.2655	17.0467	17.4554	17.6942	17.5061	17.5402	17.6573
1369.46	17.9943	17.1668	17.792	18.3715	17.6434	18.2177	18.1356	18.2683	17.3922	15.1358	16.6355	16.8334	16.4904	16.795	17.2555	17.1884	17.4265	17.1052	17.2973	16.9084	17.4954	17.1678	16.1546		15.0723	16.5213	15.0334	15.4358	14.8206	15.9781	13.3864	14.3322	14.6876	15.5617	16.4927	16.6312	16.8756	16.8656	16.858	16.5419	17.0688	17.013	15.2357	17.0234	17.4238	17.6674	17.478	17.5129	17.6264
1371.39	18.0061	17.1973	17.8142	18.4061	17.6697	18.2635	18.1793	18.3029	17.4355	15.1739	16.648	16.8511	16.5127	16.8196	17.2815	17.2198	17.4596	17.1367	17.3324	16.9405	17.51	17.1936	16.1772		15.0956	16.5321	15.0522	15.461	14.8364	16.0091	13.4033	14.3521	14.7113	15.5981	16.528	16.6517	16.8953	16.8745	16.8795	16.5737	17.0892	17.0287	15.2361	17.0503	17.4557	17.6975	17.513	17.5299	17.6497
1373.32	17.9311	17.1552	17.7509	18.3653	17.6307	18.2175	18.1293	18.2664	17.3934	15.1354	16.6108	16.8137	16.4735	16.7758	17.2463	17.1772	17.4141	17.0966	17.2814	16.8873	17.4668	17.137	16.1305		15.0521	16.47	15.0157	15.4062	14.7964	15.9715	13.3648	14.2962	14.6713	15.562	16.489	16.6076	16.8531	16.8153	16.84	16.5193	17.0484	16.9629	15.1777	16.994	17.4164	17.6521	17.4526	17.4738	17.6039
1375.25	17.8867	17.0839	17.708	18.3037	17.5718	18.143	18.0586	18.2061	17.3321	15.0774	16.5683	16.7689	16.4216	16.7276	17.1928	17.1146	17.3586	17.0413	17.2169	16.8319	17.4192	17.0808	16.0771		14.9966	16.4206	14.9667	15.3661	14.7507	15.917	13.3204	14.2429	14.6195	15.4991	16.4265	16.5505	16.7982	16.7793	16.7927	16.4582	16.9926	16.9173	15.14	16.9309	17.3518	17.5903	17.3863	17.4261	17.5517
1377.17	17.8904	17.0767	17.7156	18.2875	17.5604	18.1315	18.0562	18.1883	17.3121	15.0628	16.5512	16.7453	16.4104	16.7152	17.1785	17.0962	17.3434	17.0225	17.2095	16.8244	17.4025	17.0746	16.065		14.9852	16.4175	14.9474	15.3538	14.7375	15.8993	13.3046	14.2373	14.6057	15.4834	16.4124	16.5382	16.7821	16.7765	16.7734	16.4564	16.9768	16.9146	15.1315	16.9202	17.3411	17.5697	17.3795	17.4098	17.5418
1379.1	17.886	17.0662	17.7101	18.2685	17.5488	18.1148	18.0411	18.1746	17.2929	15.0456	16.5271	16.726	16.3928	16.6981	17.1646	17.076	17.3253	17.003	17.1952	16.8099	17.3864	17.0576	16.0496		14.9752	16.4046	14.9283	15.3312	14.7189	15.879	13.2829	14.2276	14.591	15.4659	16.3972	16.5238	16.7637	16.763	16.751	16.4502	16.959	16.9042	15.1177	16.9112	17.3252	17.5492	17.3632	17.3939	17.5261
1381.03	17.8772	17.0385	17.6877	18.2429	17.5315	18.0919	18.0115	18.1498	17.2676	15.0255	16.4972	16.7031	16.3629	16.6799	17.1296	17.0532	17.3023	16.9778	17.1652	16.785	17.3614	17.036	16.0223		14.9553	16.3842	14.9034	15.2925	14.6929	15.853	13.2588	14.2076	14.5666	15.4409	16.3726	16.4953	16.7398	16.7423	16.7245	16.4227	16.9356	16.8901	15.1074	16.8947	17.2921	17.5255	17.3438	17.3788	17.5006
1382.96	17.8801	17.0351	17.6883	18.2561	17.5373	18.1042	18.035	18.1572	17.2747	15.0368	16.4984	16.7031	16.3616	16.6817	17.1355	17.0674	17.3085	16.9848	17.1759	16.795	17.3531	17.0426	16.0214		14.9585	16.377	14.9052	15.2834	14.6896	15.85	13.2599	14.2073	14.5701	15.4481	16.3769	16.4897	16.7389	16.7337	16.7259	16.4231	16.933	16.8863	15.1076	16.895	17.2938	17.5291	17.3534	17.3857	17.4967
1384.89	17.8508	17.0458	17.6681	18.2628	17.5447	18.1271	18.0524	18.1694	17.2807	15.0466	16.4983	16.7029	16.3668	16.6701	17.1515	17.073	17.3148	16.9962	17.1858	16.8003	17.3436	17.0472	16.0187		14.9581	16.3869	14.9033	15.2802	14.6929	15.8508	13.26	14.2088	14.5778	15.4629	16.3895	16.5001	16.7328	16.7229	16.7305	16.4163	16.9315	16.8647	15.0845	16.8986	17.3105	17.5368	17.3652	17.3824	17.501
1386.82	17.7595	16.9779	17.571	18.1921	17.4578	18.0498	17.9752	18.1002	17.1925	14.9792	16.4451	16.6522	16.3109	16.5979	17.0887	16.9945	17.2517	16.9367	17.1219	16.7247	17.2809	16.9704	15.9589		14.8963	16.3185	14.8523	15.2308	14.6443	15.7868	13.2054	14.1395	14.5222	15.3992	16.3253	16.4386	16.6663	16.6568	16.6717	16.3416	16.8698	16.7843	15.0054	16.8195	17.2543	17.4713	17.2843	17.2995	17.4427
1388.75	17.734	16.9154	17.5217	18.1371	17.3951	17.9775	17.909	18.0324	17.139	14.9174	16.3851	16.5967	16.2511	16.5473	17.0353	16.9265	17.1902	16.8739	17.0633	16.6706	17.2254	16.9118	15.9069		14.8399	16.2463	14.7987	15.1867	14.5862	15.7271	13.1505	14.0868	14.4603	15.3313	16.2598	16.3703	16.6131	16.6163	16.6114	16.2865	16.812	16.7444	14.9567	16.759	17.1871	17.4077	17.2165	17.2376	17.38
1390.68	17.782	16.9458	17.5648	18.1744	17.4472	18.0281	17.9417	18.0743	17.1999	14.952	16.399	16.6173	16.2776	16.5828	17.0555	16.9639	17.2226	16.9036	17.0955	16.7123	17.2496	16.9448	15.9318		14.8663	16.2744	14.814	15.2034	14.6054	15.7619	13.1736	14.1257	14.4851	15.3659	16.2923	16.4019	16.6437	16.6447	16.6395	16.3205	16.8356	16.7803	14.985	16.7974	17.2146	17.4445	17.2613	17.2769	17.4089
1392.61	17.7612	16.961	17.5533	18.1889	17.4666	18.0569	17.9712	18.096	17.2263	14.9619	16.4002	16.6211	16.2811	16.5767	17.0571	16.9823	17.2314	16.9141	17.1045	16.715	17.2464	16.9458	15.9268		14.8672	16.2791	14.816	15.1966	14.611	15.7717	13.1829	14.1252	14.4973	15.3854	16.3065	16.4137	16.6485	16.6351	16.6468	16.3228	16.8379	16.7626	14.982	16.8056	17.2264	17.4488	17.2773	17.2843	17.4221
1394.53	17.6516	16.9029	17.4621	18.1318	17.4014	17.9901	17.9075	18.0389	17.1576	14.9029	16.3494	16.5622	16.2263	16.4936	17.0159	16.9286	17.1732	16.8595	17.0405	16.647	17.1768	16.8721	15.858		14.8041	16.2252	14.7687	15.157	14.5619	15.7109	13.1356	14.0513	14.4501	15.3239	16.2526	16.3431	16.588	16.5592	16.5904	16.2506	16.7763	16.6752	14.9323	16.7314	17.1708	17.3873	17.2046	17.2199	17.3727
1396.46	17.5992	16.8608	17.4289	18.0808	17.3516	17.9331	17.8438	17.9864	17.0966	14.8615	16.3022	16.5237	16.197	16.4454	16.9733	16.8712	17.1264	16.8076	16.9974	16.6038	17.136	16.8315	15.8216		14.7649	16.1868	14.7247	15.1267	14.518	15.6719	13.0895	14.0049	14.4006	15.2757	16.2043	16.2994	16.5475	16.5113	16.5489	16.204	16.7339	16.6398	14.9006	16.6844	17.1195	17.3518	17.1592	17.1643	17.3284
1398.39	17.5717	16.822	17.3929	18.029	17.2903	17.865	17.781	17.9312	17.0373	14.8109	16.2576	16.4717	16.1544	16.4151	16.9096	16.8164	17.0798	16.7593	16.9514	16.5523	17.1004	16.7782	15.7845		14.7272	16.1343	14.6827	15.0601	14.4733	15.6222	13.0414	13.9615	14.3531	15.2294	16.1507	16.2588	16.5009	16.4696	16.5024	16.1644	16.6877	16.603	14.858	16.6436	17.0723	17.2954	17.1031	17.1129	17.2755
1400.32	17.5552	16.7534	17.363	17.9703	17.2316	17.8028	17.7254	17.8645	16.9821	14.7514	16.2008	16.4119	16.0824	16.3719	16.8723	16.7554	17.0234	16.7024	16.8926	16.5007	17.0439	16.7331	15.7323		14.6741	16.0803	14.6275	14.9972	14.4097	15.5645	12.9838	13.9163	14.2937	15.1686	16.0874	16.1947	16.4416	16.4283	16.438	16.1131	16.6271	16.5682	14.7908	16.5909	17.0037	17.236	17.0517	17.0642	17.2103
1402.25	17.5897	16.7812	17.4152	18.0033	17.287	17.8576	17.771	17.9009	17.0248	14.7946	16.2205	16.4408	16.1077	16.397	16.8925	16.7832	17.054	16.7371	16.9269	16.5412	17.065	16.7735	15.7521		14.6969	16.1164	14.6476	15.0337	14.4332	15.5923	13.007	13.9516	14.3221	15.2031	16.1189	16.2237	16.4708	16.4551	16.4649	16.1339	16.6531	16.5975	14.8044	16.6176	17.0246	17.2644	17.0968	17.1019	17.2352
1404.18	17.5023	16.704	17.335	17.9383	17.2176	17.7909	17.7001	17.8351	16.9543	14.7384	16.1615	16.3842	16.0471	16.3381	16.8282	16.72	16.9891	16.6747	16.8635	16.4734	17.009	16.6998	15.6835		14.6401	16.0474	14.5962	14.9784	14.3835	15.5279	12.9546	13.8875	14.2703	15.1401	16.0525	16.1611	16.4135	16.3885	16.4059	16.0645	16.5954	16.5243	14.7505	16.5484	16.9651	17.1971	17.0257	17.0475	17.1714
1406.11	17.4679	16.6508	17.2785	17.8863	17.1588	17.7296	17.6406	17.7781	16.908	14.6835	16.1139	16.3322	15.9886	16.3027	16.7887	16.6655	16.9363	16.6165	16.8121	16.4198	16.9605	16.642	15.6293		14.596	15.9898	14.5462	14.9293	14.3336	15.4738	12.9081	13.8443	14.2213	15.085	16.0005	16.1072	16.3621	16.3473	16.353	16.0166	16.5455	16.4825	14.7087	16.503	16.9176	17.1452	16.9685	17.0033	17.1227
1408.04	17.4641	16.6484	17.2616	17.868	17.1596	17.7175	17.6309	17.763	16.9055	14.6647	16.0929	16.3083	15.9632	16.283	16.7485	16.6502	16.9216	16.5998	16.7965	16.4078	16.9398	16.627	15.609		14.574	15.9726	14.5156	14.9148	14.3054	15.4529	12.8896	13.8337	14.2032	15.0718	15.9881	16.0894	16.3399	16.3298	16.3295	16.0062	16.5254	16.4718	14.6943	16.4891	16.9008	17.126	16.9522	16.9867	17.1067
1409.96	17.4256	16.6298	17.2311	17.847	17.1279	17.6975	17.6097	17.746	16.8846	14.6409	16.0631	16.2777	15.9444	16.2449	16.7275	16.6278	16.8994	16.5783	16.7733	16.3866	16.9158	16.6034	15.5851		14.5389	15.9394	14.4875	14.8826	14.2787	15.4229	12.8707	13.8054	14.1813	15.0496	15.9685	16.0585	16.3135	16.2996	16.2975	15.9847	16.4995	16.4418	14.6664	16.4547	16.8753	17.095	16.9272	16.9533	17.0816
1411.89	17.3725	16.5711	17.1839	17.792	17.0684	17.6397	17.5616	17.6957	16.8253	14.5913	16.0066	16.2196	15.8954	16.1904	16.6918	16.5701	16.8434	16.5221	16.7207	16.3347	16.866	16.5579	15.5387		14.4905	15.8765	14.4379	14.829	14.2309	15.3769	12.8254	13.7581	14.1296	14.9964	15.917	16.0018	16.2623	16.252	16.2441	15.9395	16.4446	16.3923	14.6175	16.3979	16.8268	17.0491	16.8733	16.8978	17.0294
1413.82	17.3783	16.5666	17.1935	17.7984	17.0808	17.6525	17.5745	17.7008	16.8295	14.5973	16.0054	16.2112	15.8975	16.1871	16.6752	16.5717	16.8456	16.5254	16.73	16.3421	16.8604	16.5582	15.5385		14.4917	15.881	14.4314	14.8351	14.2325	15.3887	12.8245	13.76	14.1297	15.0027	15.9223	16.0021	16.2624	16.2478	16.2448	15.941	16.4377	16.3828	14.6078	16.4013	16.8317	17.0496	16.8805	16.9062	17.0297
1415.75	17.3497	16.5781	17.1776	17.8153	17.0984	17.6869	17.6065	17.7198	16.8428	14.6116	16.0049	16.2142	15.9113	16.174	16.6975	16.5806	16.8579	16.54	16.7444	16.3457	16.857	16.559	15.5346		14.4906	15.8864	14.4286	14.8262	14.2426	15.398	12.828	13.7532	14.1401	15.02	15.9292	16.0152	16.2717	16.2233	16.2547	15.9416	16.4421	16.3537	14.5998	16.4074	16.8474	17.0572	16.8995	16.9	17.0358
1417.68	17.2355	16.5213	17.0661	17.7515	17.0293	17.616	17.5244	17.6578	16.7508	14.5392	15.9464	16.1662	15.8671	16.0913	16.6459	16.5161	16.7966	16.4818	16.6655	16.2604	16.7915	16.4776	15.4631		14.4294	15.8171	14.3796	14.7491	14.193	15.3321	12.7753	13.6771	14.0927	14.9542	15.8597	15.9669	16.2092	16.1365	16.1974	15.8686	16.3831	16.2576	14.5428	16.3375	16.7986	16.9967	16.8205	16.8353	16.975
1419.61	17.0954	16.3418	16.9235	17.5862	16.848	17.4075	17.2891	17.4789	16.5593	14.3596	15.8113	16.0185	15.7066	15.9479	16.4762	16.345	16.6309	16.3208	16.4866	16.0949	16.6455	16.3097	15.318		14.2822	15.6517	14.2469	14.6221	14.0383	15.1669	12.6304	13.5353	13.9342	14.7787	15.6874	15.8031	16.0426	16.0004	16.037	15.7113	16.228	16.123	14.4041	16.1764	16.6239	16.8374	16.6283	16.6908	16.8132
1421.54	17.1556	16.3944	16.9907	17.6304	16.8886	17.4728	17.3463	17.5263	16.6233	14.4089	15.8337	16.0342	15.7221	15.9916	16.5214	16.3798	16.6694	16.3572	16.5439	16.1478	16.6622	16.3525	15.345		14.311	15.6895	14.2621	14.6631	14.0608	15.1977	12.652	13.58	13.9603	14.8312	15.7345	15.8244	16.0708	16.0441	16.0709	15.7451	16.2522	16.1743	14.4344	16.2213	16.6455	16.8684	16.6889	16.7263	16.8513
1423.47	17.0934	16.3432	16.9307	17.5652	16.829	17.4129	17.2977	17.4636	16.5642	14.3613	15.7792	15.984	15.6704	15.9451	16.4513	16.3235	16.6017	16.2922	16.4886	16.0864	16.6021	16.3008	15.2918		14.2636	15.6435	14.2105	14.6181	14.0168	15.1455	12.603	13.5177	13.9105	14.7759	15.679	15.7655	16.0264	15.995	16.0216	15.6869	16.1964	16.1221	14.3951	16.164	16.5802	16.7973	16.633	16.6673	16.798
1425.4	17.0761	16.2877	16.91	17.5118	16.7994	17.3661	17.2644	17.4158	16.536	14.3271	15.7311	15.9434	15.6319	15.9194	16.4044	16.2827	16.5594	16.249	16.45	16.0535	16.5627	16.2696	15.2627		14.2261	15.6007	14.1686	14.5704	13.9742	15.105	12.5642	13.4855	13.8693	14.7347	15.6388	15.7155	15.9857	15.9646	15.9724	15.6477	16.153	16.0978	14.3584	16.1103	16.5407	16.7575	16.596	16.6233	16.7521
1427.32	17.0711	16.2755	16.9083	17.5028	16.7939	17.37	17.2913	17.4156	16.5501	14.3275	15.7091	15.9275	15.6161	15.9052	16.398	16.276	16.5563	16.2421	16.4485	16.0537	16.5485	16.2625	15.2542		14.2146	15.5841	14.1523	14.5512	13.9564	15.0953	12.555	13.4858	13.8625	14.7375	15.6368	15.7174	15.9717	15.9503	15.9568	15.6302	16.1482	16.0871	14.3335	16.1008	16.5454	16.7503	16.5973	16.6137	16.7418
1429.25	17.0034	16.2207	16.8247	17.444	16.7368	17.303	17.2385	17.3569	16.4984	14.2698	15.6519	15.8774	15.5564	15.8344	16.3354	16.2154	16.5021	16.184	16.3822	15.9886	16.4863	16.1898	15.1854		14.1541	15.5207	14.103	14.482	13.9047	15.0332	12.5068	13.4256	13.8103	14.6746	15.5806	15.6585	15.9121	15.8811	15.8951	15.568	16.0883	16.0147	14.2696	16.0371	16.4907	16.6893	16.5291	16.5376	16.684
1431.18	16.9375	16.1524	16.7429	17.3742	16.6665	17.2258	17.1644	17.277	16.4219	14.2017	15.5838	15.8078	15.4904	15.7649	16.2644	16.1425	16.4342	16.1104	16.309	15.9165	16.4159	16.1197	15.118		14.0863	15.4649	14.0351	14.4025	13.8407	14.9595	12.4408	13.3574	13.7409	14.5975	15.5062	15.5743	15.8397	15.8098	15.8234	15.5097	16.0118	15.9452	14.1992	15.9647	16.4094	16.6282	16.4566	16.4606	16.6093
1433.11	16.9463	16.1746	16.771	17.4004	16.693	17.2727	17.1858	17.3012	16.4433	14.2289	15.5928	15.8166	15.502	15.7762	16.291	16.1642	16.4566	16.1327	16.3402	15.9455	16.4298	16.1529	15.14		14.1027	15.4916	14.0407	14.4275	13.8528	14.9807	12.4534	13.3758	13.7583	14.6295	15.5307	15.5948	15.8605	15.8193	15.8489	15.5247	16.0276	15.9592	14.2041	15.9904	16.4289	16.6548	16.4974	16.4855	16.6265
1435.04	16.8674	16.1239	16.7044	17.3411	16.642	17.2182	17.1221	17.2446	16.3761	14.1727	15.5374	15.7699	15.4426	15.7056	16.2257	16.1008	16.3901	16.0779	16.2734	15.8812	16.3786	16.0952	15.0794		14.0458	15.4273	13.9918	14.3816	13.8091	14.9245	12.4069	13.3153	13.7144	14.5909	15.4817	15.5479	15.8065	15.7533	15.8015	15.459	15.9763	15.8835	14.1438	15.9357	16.3864	16.5999	16.4387	16.429	16.5711
1436.97	16.7012	15.9381	16.5281	17.1548	16.449	16.9939	16.9202	17.056	16.1677	13.9921	15.3892	15.616	15.2777	15.5474	16.0649	15.9209	16.2097	15.9048	16.0759	15.6919	16.2215	15.9044	14.9162		13.8842	15.2419	13.8502	14.2096	13.6492	14.7536	12.2513	13.1528	13.5504	14.3922	15.2946	15.3733	15.6228	15.5933	15.6285	15.2957	15.8068	15.718	13.992	15.7553	16.1996	16.4277	16.2256	16.2524	16.3955
1438.9	16.6939	15.9011	16.5221	17.1228	16.4225	16.9706	16.8964	17.0231	16.1376	13.9709	15.3519	15.5659	15.2521	15.5373	16.0377	15.8933	16.1885	15.8735	16.0553	15.6745	16.1854	15.8798	14.8834		13.8589	15.2186	13.813	14.1756	13.6071	14.7295	12.2186	13.1421	13.5088	14.3593	15.2615	15.3377	15.5906	15.5746	15.588	15.2702	15.773	15.7135	13.9715	15.726	16.1615	16.3932	16.2072	16.2249	16.3666
1440.83	16.6903	15.8972	16.5249	17.1182	16.4231	16.9744	16.899	17.0167	16.1359	13.9689	15.3349	15.5541	15.2424	15.5323	16.0134	15.8827	16.1825	15.8616	16.0557	15.6721	16.1737	15.8768	14.8737		13.8554	15.2237	13.7977	14.1727	13.5994	14.7213	12.2107	13.1386	13.499	14.3611	15.2539	15.3262	15.5836	15.5675	15.5708	15.257	15.7597	15.714	13.9666	15.7298	16.1606	16.3806	16.2101	16.2185	16.3553
1442.75	16.6435	15.8453	16.475	17.0593	16.369	16.9227	16.8371	16.9644	16.0888	13.9187	15.2751	15.5065	15.1824	15.4717	15.963	15.8227	16.1261	15.806	16.0045	15.6189	16.1146	15.8221	14.824		13.8028	15.1748	13.7402	14.1195	13.5469	14.6685	12.1608	13.0856	13.4495	14.3139	15.2015	15.2685	15.5237	15.5097	15.5185	15.199	15.6987	15.6561	13.911	15.6698	16.105	16.3227	16.1573	16.17	16.2959
1444.68	16.6265	15.83	16.4508	17.0508	16.3583	16.9165	16.8195	16.9531	16.0872	13.9077	15.2483	15.4807	15.164	15.4484	15.9456	15.8056	16.108	15.7893	15.9903	15.6076	16.0861	15.8023	14.8037		13.7809	15.1496	13.7222	14.1097	13.527	14.659	12.1465	13.0653	13.4379	14.2972	15.1916	15.2498	15.4974	15.4811	15.5049	15.1795	15.6765	15.6258	13.8754	15.6517	16.0896	16.3082	16.1439	16.1556	16.2821
1446.61	16.5184	15.7516	16.3517	16.9757	16.2812	16.8383	16.735	16.8732	16.0107	13.8306	15.1735	15.402	15.0889	15.3683	15.8649	15.7289	16.024	15.7096	15.9106	15.5247	16.014	15.7161	14.7196		13.7081	15.06	13.659	14.0321	13.4555	14.5829	12.0803	12.9831	13.3693	14.2241	15.1146	15.1765	15.417	15.3938	15.4271	15.0942	15.6045	15.5335	13.7968	15.5755	16.0171	16.2243	16.0596	16.0685	16.2093
1448.54	16.4235	15.6547	16.2557	16.8777	16.1779	16.7366	16.6304	16.7784	15.9174	13.7366	15.0907	15.3094	14.9898	15.2765	15.7914	15.6334	15.9295	15.6161	15.8162	15.4252	15.9238	15.6201	14.6277		13.6226	14.9583	13.5776	13.9293	13.3635	14.4889	11.9975	12.8981	13.2798	14.1327	15.0188	15.0802	15.3268	15.3033	15.3317	15.0055	15.5122	15.4407	13.7264	15.4666	15.9027	16.1176	15.9579	15.9687	16.1147
1450.47	16.3939	15.6294	16.2318	16.8409	16.141	16.7079	16.6086	16.7432	15.8898	13.7055	15.0482	15.258	14.9521	15.227	15.7377	15.5926	15.894	15.5776	15.7815	15.3912	15.8704	15.586	14.5914		13.5853	14.917	13.5307	13.8865	13.3234	14.4506	11.9568	12.8676	13.2441	14.1017	14.9845	15.0368	15.2908	15.2684	15.2869	14.9721	15.4659	15.4013	13.6886	15.4225	15.8558	16.0706	15.9248	15.9337	16.0693
1452.4	16.3756	15.6253	16.2183	16.8441	16.1531	16.7215	16.619	16.7484	15.8834	13.7086	15.0343	15.2545	14.9485	15.2081	15.7187	15.5905	15.897	15.5823	15.7839	15.3902	15.8545	15.5816	14.5781		13.5762	14.9096	13.5164	13.8892	13.3201	14.4443	11.9499	12.8596	13.2427	14.0994	14.9832	15.0283	15.2877	15.2477	15.2781	14.9636	15.4507	15.3829	13.665	15.4234	15.8583	16.0732	15.9276	15.9195	16.0611
1454.33	16.3375	15.6465	16.1947	16.868	16.1701	16.7708	16.6477	16.7774	15.8945	13.7214	15.0254	15.2628	14.9556	15.1943	15.7474	15.6009	15.9126	15.6025	15.7998	15.3955	15.8545	15.5981	14.5707		13.5772	14.921	13.5083	13.8925	13.333	14.4534	11.9599	12.8528	13.2585	14.1258	14.9964	15.0561	15.3041	15.2315	15.2942	14.9627	15.4607	15.368	13.6519	15.4363	15.8998	16.0931	15.956	15.912	16.0711
1456.26	16.0974	15.4978	15.9775	16.6946	15.9804	16.5984	16.4619	16.6086	15.7114	13.5446	14.882	15.1255	14.8244	15.0238	15.5899	15.4334	15.739	15.4564	15.6246	15.208	15.6999	15.3985	14.4024		13.424	14.7653	13.3833	13.7408	13.21	14.2933	11.8272	12.6768	13.1355	13.9732	14.8323	14.9241	15.1581	15.0535	15.1535	14.7922	15.3127	15.1653	13.5074	15.2572	15.7781	15.9316	15.758	15.7383	15.9288
1458.18	15.8878	15.2114	15.7388	16.4032	15.6837	16.261	16.1518	16.3036	15.4202	13.2841	14.6599	14.898	14.5843	14.8128	15.3465	15.1679	15.4577	15.1731	15.3483	14.9347	15.4685	15.1357	14.1885		13.1994	14.5199	13.1757	13.5261	12.9743	14.0429	11.6007	12.4572	12.8835	13.6848	14.5644	14.6597	14.9049	14.8308	14.9039	14.5599	15.0708	14.9517	13.3077	15.0026	15.4863	15.6614	15.4692	15.4995	15.6696
1460.11	15.9908	15.2306	15.8211	16.4468	15.7266	16.3045	16.2065	16.3509	15.4728	13.3461	14.6778	14.9014	14.5917	14.8608	15.364	15.207	15.5004	15.1982	15.3934	15.0009	15.4801	15.1895	14.23		13.226	14.5515	13.1793	13.5521	12.9821	14.0756	11.6214	12.5143	12.8959	13.7245	14.6038	14.6624	14.9149	14.8854	14.9169	14.5984	15.0836	15.0218	13.3311	15.041	15.4926	15.6882	15.5299	15.5395	15.6845
1462.04	16.0322	15.2652	15.8548	16.4768	15.7664	16.3515	16.2537	16.3841	15.5034	13.3784	14.6854	14.909	14.6016	14.8813	15.3698	15.2233	15.526	15.2174	15.4178	15.0362	15.4909	15.2272	14.2405		13.2388	14.5775	13.18	13.5556	12.99	14.0995	11.6359	12.5406	12.9126	13.7708	14.6363	14.6832	14.9274	14.9091	14.9303	14.6186	15.0979	15.0455	13.3419	15.0747	15.5155	15.7208	15.5709	15.5557	15.7051
1463.97	15.9141	15.1747	15.7361	16.3763	15.6661	16.2377	16.1438	16.2851	15.4063	13.2731	14.5992	14.8166	14.5115	14.7841	15.2813	15.119	15.4255	15.1264	15.3142	14.9328	15.4018	15.1187	14.1375		13.1476	14.4687	13.1012	13.4676	12.9038	14.0041	11.5571	12.4451	12.8313	13.6781	14.5355	14.5932	14.8341	14.8016	14.8345	14.5157	15.0051	14.9275	13.2515	14.98	15.4163	15.6226	15.4554	15.4596	15.6109
1465.9	15.78	15.0183	15.6037	16.2215	15.5143	16.0691	15.981	16.1243	15.2679	13.1305	14.4712	14.6789	14.3778	14.6422	15.1471	14.9754	15.2866	14.9842	15.1679	14.7893	15.2677	14.9747	14.003		13.0205	14.3238	12.976	13.3414	12.7718	13.8674	11.4268	12.3117	12.6958	13.5199	14.3891	14.4547	14.6984	14.6666	14.6943	14.3796	14.8657	14.7987	13.1211	14.8371	15.265	15.4789	15.3067	15.3199	15.4615
1467.83	15.7958	15.0264	15.6309	16.2323	15.5333	16.1061	15.9996	16.1349	15.2884	13.1574	14.4661	14.6772	14.374	14.644	15.1322	14.9913	15.3055	14.9924	15.1927	14.8111	15.2663	14.9916	14.0105		13.0276	14.3366	12.9675	13.3342	12.7756	13.8801	11.4296	12.3262	12.694	13.5373	14.4058	14.459	14.7045	14.6797	14.6937	14.3866	14.8655	14.8137	13.1142	14.8531	15.2738	15.486	15.3387	15.3252	15.4616
1469.76	15.7686	15.0351	15.6177	16.2541	15.5519	16.1502	16.0233	16.1609	15.3183	13.1818	14.456	14.6724	14.3706	14.6367	15.1463	15.0068	15.3208	15.0075	15.2178	14.825	15.2727	15.0028	14.0092		13.0346	14.3518	12.968	13.3306	12.7814	13.8832	11.4383	12.3319	12.7069	13.5669	14.424	14.4665	14.7091	14.6713	14.6981	14.3883	14.8738	14.8002	13.1118	14.8589	15.2986	15.4937	15.3625	15.3218	15.4705
1471.69	15.5859	14.9212	15.4377	16.1442	15.4236	16.023	15.9049	16.0514	15.2018	13.0587	14.353	14.565	14.2675	14.5054	15.0514	14.8918	15.2117	14.9087	15.0937	14.6913	15.1685	14.8657	13.8826		12.9235	14.2384	12.8777	13.2233	12.6918	13.7695	11.3492	12.2049	12.6231	13.4519	14.3066	14.3504	14.599	14.5285	14.5946	14.2611	14.764	14.644	13.0047	14.7179	15.2016	15.3746	15.2142	15.1887	15.3669
1473.62	15.388	14.7222	15.2569	15.9182	15.2252	15.7895	15.7076	15.8283	14.9812	12.854	14.1851	14.4024	14.0987	14.3282	14.8711	14.687	15.011	14.7091	14.8806	14.4869	14.991	14.683	13.7084		12.7482	14.0382	12.7126	13.0402	12.523	13.5801	11.1867	12.0268	12.448	13.2491	14.1076	14.1755	14.422	14.3526	14.4271	14.0964	14.5834	14.4737	12.8375	14.532	15.0047	15.1951	15.0079	15.0137	15.1828
1475.54	15.3665	14.6543	15.2196	15.8423	15.1706	15.7131	15.6502	15.7513	14.9034	12.7961	14.1181	14.3392	14.0339	14.2834	14.8023	14.6199	14.9402	14.6357	14.8223	14.44	14.9265	14.6267	13.6606		12.6989	13.9899	12.6502	12.9824	12.4596	13.5182	11.1254	11.9835	12.3833	13.2	14.0474	14.113	14.3512	14.3045	14.3617	14.0511	14.5247	14.4328	12.7925	14.4841	14.9268	15.1279	14.9513	14.9667	15.1177
1477.47	15.3321	14.577	15.1507	15.7677	15.0949	15.6297	15.5517	15.6711	14.8153	12.7329	14.0343	14.2593	13.9443	14.2232	14.7223	14.5502	14.8652	14.5565	14.7538	14.3713	14.8426	14.5541	13.5941		12.6265	13.9214	12.5665	12.925	12.3769	13.4441	11.0515	11.9289	12.3028	13.1288	13.9728	14.0303	14.264	14.238	14.2784	13.9762	14.4427	14.3766	12.7313	14.4017	14.8337	15.0401	14.8783	14.8933	15.0312
1479.4	15.3094	14.556	15.1242	15.7407	15.0807	15.6139	15.5224	15.6507	14.7995	12.7238	14.0033	14.2303	13.9172	14.2014	14.683	14.5271	14.846	14.5357	14.7298	14.3498	14.8045	14.5314	13.56		12.5933	13.885	12.5346	12.9042	12.3503	13.4187	11.026	11.9137	12.2754	13.1054	13.9558	14.0101	14.2342	14.2137	14.2453	13.9373	14.4091	14.3498	12.6857	14.368	14.8134	15.0097	14.862	14.8717	14.9966
1481.33	15.1786	14.4304	14.9997	15.614	14.9538	15.4862	15.3957	15.5231	14.6761	12.6115	13.8969	14.1143	13.8048	14.092	14.571	14.4022	14.7232	14.4166	14.6033	14.2323	14.692	14.4119	13.4526		12.4874	13.7663	12.4341	12.7942	12.2433	13.312	10.9245	11.7989	12.1667	12.9909	13.8429	13.8926	14.1231	14.102	14.1303	13.8195	14.2983	14.2355	12.564	14.2479	14.7008	14.8895	14.7397	14.754	14.8762
1483.26	15.1282	14.3722	14.9563	15.5575	14.8928	15.4476	15.3447	15.4729	14.6296	12.5626	13.8385	14.0556	13.7552	14.0353	14.522	14.3511	14.6719	14.3643	14.5568	14.1877	14.6277	14.3654	13.4068		12.4403	13.7125	12.383	12.7322	12.1887	13.2693	10.8785	11.749	12.1201	12.9562	13.7986	13.8351	14.0692	14.05	14.0793	13.7681	14.2442	14.1898	12.5127	14.2043	14.6443	14.8448	14.6982	14.6946	14.824
1485.19	15.0549	14.3212	14.8981	15.509	14.8481	15.4146	15.2992	15.4296	14.5847	12.5142	13.7721	14.0099	13.7037	13.9518	14.4545	14.3037	14.6267	14.3192	14.5113	14.1387	14.5662	14.3184	13.348		12.3849	13.6665	12.3312	12.6734	12.1381	13.2201	10.8346	11.6988	12.0791	12.9199	13.7466	13.7872	14.017	13.9849	14.0264	13.6996	14.1869	14.1183	12.4653	14.1463	14.5999	14.794	14.6544	14.6365	14.771
1487.12	14.9355	14.2538	14.8037	15.4412	14.7928	15.3584	15.226	15.3661	14.5291	12.4483	13.6949	13.9435	13.6318	13.8496	14.402	14.2357	14.5657	14.2612	14.4441	14.0651	14.486	14.2407	13.2631		12.3113	13.5829	12.2683	12.6133	12.0797	13.1521	10.7798	11.6177	12.0243	12.8527	13.6733	13.7178	13.951	13.8873	13.9542	13.6112	14.1129	14.0055	12.3871	14.0602	14.5354	14.7237	14.5793	14.5616	14.7004
1489.05	14.7062	14.0389	14.5533	15.2215	14.5663	15.1068	14.9916	15.13	14.317	12.2385	13.5226	13.7489	13.4384	13.6505	14.2021	14.018	14.3475	14.0445	14.2129	13.8325	14.2915	14.0276	13.0656		12.128	13.3666	12.0965	12.4382	11.9038	12.9446	10.5998	11.4131	11.8308	12.6386	13.4577	13.5255	13.7568	13.6774	13.7599	13.4104	13.9227	13.7944	12.2077	13.8634	14.3266	14.5058	14.3448	14.3444	14.4944
1490.97	14.6069	13.8763	14.4162	15.0594	14.3884	14.9137	14.8187	14.9557	14.1379	12.0889	13.3855	13.5957	13.2883	13.5313	14.0372	13.8607	14.1865	13.8826	14.0533	13.679	14.1509	13.8747	12.9269		11.9931	13.2253	11.9546	12.2947	11.7525	12.7912	10.455	11.2891	11.677	12.4779	13.3025	13.3654	13.6044	13.5554	13.6017	13.2782	13.7701	13.6805	12.0852	13.7293	14.1517	14.3443	14.1837	14.1893	14.3362
1492.9	14.6098	13.8744	14.4299	15.0531	14.3903	14.9274	14.8285	14.9617	14.1377	12.0946	13.3484	13.567	13.2673	13.5256	14.0303	13.8584	14.1779	13.87	14.055	13.686	14.1186	13.8727	12.912		11.9756	13.2234	11.9179	12.2634	11.7256	12.7834	10.4399	11.2949	11.6643	12.4812	13.3055	13.3474	13.5889	13.5514	13.5824	13.2719	13.7474	13.6825	12.0608	13.7216	14.1375	14.3348	14.2053	14.1819	14.3195
1494.83	14.5216	13.8494	14.3766	15.01	14.3643	14.8975	14.7991	14.9291	14.095	12.0634	13.2923	13.5196	13.2232	13.4676	13.9685	13.8175	14.132	13.8269	14.0146	13.6421	14.0589	13.8184	12.8564		11.9207	13.1784	11.8658	12.2021	11.687	12.7405	10.4073	11.2541	11.6295	12.4499	13.2689	13.3135	13.5372	13.4924	13.5413	13.2124	13.6978	13.6118	12.0007	13.6597	14.1083	14.2889	14.1657	14.1277	14.279
1496.76	14.2919	13.6268	14.1465	14.7885	14.1431	14.6644	14.5525	14.7044	13.8419	11.8504	13.0983	13.3173	13.0237	13.2571	13.7686	13.591	13.9126	13.6203	13.7938	13.4176	13.8632	13.5954	12.6571		11.7192	12.9615	11.6887	12.0265	11.5046	12.535	10.2317	11.052	11.4351	12.2396	13.0483	13.1098	13.3277	13.2855	13.3387	13.0028	13.4932	13.3925	11.8069	13.4268	13.9106	14.0846	13.9257	13.917	14.0731
1498.69	14.1811	13.4843	14.0142	14.6503	13.9886	14.5137	14.4076	14.5586	13.6991	11.7216	12.9759	13.1801	12.8897	13.133	13.6416	13.4539	13.782	13.4862	13.6547	13.2874	13.7278	13.4613	12.5324		11.5958	12.8382	11.5721	11.9173	11.3784	12.3969	10.1122	10.9304	11.3136	12.1044	12.9145	12.9629	13.1901	13.1606	13.1998	12.8839	13.357	13.2769	11.6806	13.2909	13.7536	13.9419	13.7838	13.7784	13.9294
1500.62	14.0876	13.3911	13.9247	14.5483	13.8919	14.4139	14.3246	14.456	13.6129	11.6344	12.8749	13.0798	12.7866	13.0299	13.5188	13.3586	13.6825	13.3798	13.5587	13.1957	13.6247	13.3695	12.4354		11.5073	12.7459	11.4682	11.8114	11.2781	12.2973	10.0163	10.8444	11.2183	12.0081	12.8191	12.8575	13.0868	13.0669	13.0943	12.7932	13.2536	13.1912	11.5855	13.2017	13.6373	13.8418	13.6909	13.674	13.8218
1502.55	14.0747	13.4046	13.9312	14.5461	13.8995	14.4442	14.3509	14.4604	13.6364	11.6387	12.8449	13.0709	12.7763	13.0122	13.5185	13.3582	13.678	13.3735	13.5634	13.194	13.617	13.3822	12.4261		11.5014	12.7434	11.4415	11.7903	11.2681	12.2992	10.0083	10.8407	11.2087	12.0154	12.8197	12.861	13.0855	13.0511	13.0868	12.7898	13.2428	13.1826	11.5773	13.2055	13.6429	13.8473	13.7109	13.6708	13.8139
1504.48	13.9683	13.3643	13.8625	14.4872	13.86	14.4335	14.3301	14.422	13.6028	11.587	12.7662	13.0181	12.723	12.9286	13.4695	13.3095	13.6187	13.3241	13.5109	13.1305	13.5632	13.3301	12.3562		11.4407	12.6783	11.3734	11.7253	11.2209	12.2469	9.96961	10.7829	11.1712	11.9828	12.7657	12.8291	13.0377	12.9614	13.0309	12.7234	13.1904	13.1013	11.5231	13.1485	13.6405	13.7978	13.6695	13.5991	13.7671
1506.41	13.5048	12.9969	13.4037	14.1106	13.471	14.0289	13.9397	14.0522	13.2201	11.2106	12.4759	12.6905	12.3901	12.5361	13.1146	12.9432	13.2306	12.9733	13.1291	12.7264	13.2505	12.9407	12.0033		11.1209	12.3064	11.0811	11.3994	10.919	11.889	9.69897	10.4226	10.8752	11.6228	12.3909	12.5026	12.7043	12.575	12.688	12.3371	12.8638	12.6956	11.2012	12.7829	13.3533	13.4206	13.2506	13.237	13.4253
1508.33	13.2866	12.7274	13.1592	13.8403	13.1724	13.6929	13.5971	13.749	12.9328	10.9618	12.2541	12.4319	12.1371	12.3105	12.8857	12.6709	12.9693	12.7037	12.8504	12.4709	13.0063	12.7013	11.7889		10.9013	12.094	10.8668	11.1872	10.6783	11.6486	9.45943	10.1923	10.6038	11.3432	12.1286	12.2315	12.4436	12.3512	12.4365	12.0913	12.6125	12.4631	10.9761	12.5338	13.004	13.1397	12.9798	12.9732	13.145
1510.26	13.3498	12.7269	13.2045	13.8535	13.1858	13.7091	13.5949	13.7546	12.9638	11.0029	12.2177	12.4067	12.1256	12.3378	12.8598	12.684	12.9933	12.7109	12.8722	12.5092	12.965	12.7033	11.7919		10.8935	12.0949	10.8475	11.1646	10.6664	11.6597	9.4437	10.2211	10.5949	11.3638	12.1463	12.2061	12.4243	12.3597	12.4262	12.1046	12.5875	12.4824	10.9713	12.5512	12.9693	13.1359	13.0044	12.966	13.1298
1512.19	13.2687	12.6193	13.1003	13.7303	13.0793	13.6093	13.4946	13.6397	12.8515	10.9087	12.097	12.2962	12.0114	12.2416	12.7313	12.5794	12.8852	12.5954	12.7712	12.4112	12.8384	12.5994	11.6814		10.7854	11.9781	10.7315	11.0488	10.559	11.5524	9.34494	10.1329	10.4934	11.2699	12.043	12.0862	12.3082	12.2607	12.315	12.0076	12.4699	12.3833	10.8664	12.4468	12.8534	13.036	12.9045	12.8628	13.0069
1514.12	13.2032	12.5612	13.0394	13.666	13.0443	13.5785	13.458	13.5894	12.8008	10.8618	12.0238	12.2248	11.9556	12.1753	12.6871	12.5302	12.8288	12.5387	12.7253	12.3566	12.7632	12.5398	11.6084		10.7225	11.9184	10.666	10.9956	10.5033	11.4961	9.29768	10.0798	10.4428	11.226	11.9931	12.0288	12.2469	12.189	12.2525	11.9444	12.3988	12.3005	10.7919	12.3757	12.8021	12.9752	12.8586	12.8009	12.9453
1516.05	12.9432	12.3356	12.8226	13.4303	12.8352	13.3382	13.2313	13.3536	12.5641	10.6482	11.8304	12.0183	11.7594	11.9501	12.4621	12.2985	12.6007	12.3189	12.4903	12.1222	12.5609	12.3202	11.3955		10.5277	11.7235	10.4872	10.8102	10.3214	11.2934	9.11604	9.86832	10.2548	11.0074	11.7788	11.8415	12.048	11.9681	12.0459	11.7328	12.2002	12.0811	10.5947	12.1481	12.5945	12.7499	12.6246	12.582	12.7381
1517.98	12.8139	12.1884	12.7092	13.2978	12.7022	13.21	13.1166	13.214	12.4114	10.5226	11.7044	11.8886	11.6153	11.8054	12.3276	12.1484	12.4661	12.1858	12.3547	11.9893	12.4216	12.1837	11.2605		10.4006	11.5845	10.3504	10.6794	10.1929	11.1606	8.99607	9.74675	10.1298	10.8845	11.6471	11.7063	11.9068	11.8375	11.9102	11.5937	12.0701	11.9601	10.4758	12.0163	12.4488	12.6162	12.4893	12.4612	12.6043
1519.91	12.668	12.0498	12.5493	13.1619	12.548	13.058	12.9598	13.0689	12.245	10.3775	11.5434	11.7333	11.4697	11.6492	12.1791	11.9937	12.311	12.0327	12.2016	11.8309	12.2695	12.036	11.1114		10.2536	11.4249	10.2005	10.5366	10.0551	11.0086	8.86703	9.61505	9.99856	10.7639	11.4966	11.5686	11.7573	11.689	11.7552	11.4154	11.9307	11.8012	10.3378	11.8696	12.3172	12.4672	12.3406	12.3065	12.4505
1521.84	12.3669	11.7819	12.2192	12.8581	12.2236	12.7159	12.6091	12.7622	11.96	10.0923	11.293	11.4707	11.2071	11.4048	11.8951	11.7275	12.0217	11.7509	11.9023	11.5348	12.0015	11.7546	10.8617		9.99514	11.1427	9.96662	10.2821	9.79891	10.7188	8.63628	9.36154	9.74703	10.4713	11.1997	11.2891	11.4907	11.4106	11.4808	11.1362	11.6604	11.5293	10.0894	11.5693	12.0342	12.2017	12.0313	12.0055	12.1687
1523.76	12.2236	11.6611	12.0934	12.7109	12.082	12.5925	12.4872	12.6184	11.8662	9.9877	11.1478	11.34	11.0722	11.2851	11.7617	11.6066	11.8933	11.6189	11.7756	11.4167	11.853	11.6252	10.7419		9.88002	11.0275	9.8412	10.1497	9.66976	10.5971	8.52294	9.25322	9.61824	10.3486	11.0796	11.1439	11.3507	11.2789	11.3482	11.0128	11.5132	11.4011	9.96289	11.4453	11.8805	12.055	11.9102	11.8684	12.0263
1525.69	12.0698	11.4965	11.9445	12.536	11.9166	12.4221	12.3167	12.4548	11.7153	9.84053	10.9962	11.1812	10.914	11.1267	11.5996	11.4412	11.7359	11.4542	11.616	11.2605	11.6862	11.4671	10.5897		9.74098	10.8729	9.70218	9.99392	9.5332	10.457	8.39137	9.12143	9.47554	10.2061	10.9284	10.9966	11.1904	11.1289	11.1934	10.859	11.3532	11.2459	9.80919	11.2846	11.715	11.8733	11.7453	11.7091	11.8577
1527.62	11.8737	11.2571	11.7279	12.2852	11.6825	12.1713	12.0687	12.207	11.4782	9.62397	10.7855	10.9571	10.6972	10.9166	11.3603	11.2068	11.4985	11.224	11.3816	11.0372	11.4634	11.2516	10.379		9.53717	10.6438	9.50021	9.78349	9.331	10.2441	8.19703	8.93064	9.26164	9.98984	10.6973	10.7783	10.9674	10.9282	10.9703	10.6626	11.134	11.0468	9.60704	11.0798	11.4793	11.6377	11.5146	11.4925	11.6224
1529.55	11.783	11.1497	11.632	12.1857	11.6014	12.0863	11.9909	12.1069	11.3731	9.54853	10.6742	10.8549	10.5921	10.8207	11.2553	11.1108	11.3961	11.1288	11.2855	10.9562	11.3488	11.1505	10.2752		9.4423	10.5476	9.39305	9.6897	9.23502	10.1468	8.11173	8.85331	9.16373	9.89518	10.6061	10.6679	10.8605	10.832	10.8599	10.577	11.0225	10.9467	9.51436	10.9937	11.3702	11.5414	11.4265	11.3941	11.5154
1531.48	11.5993	10.9921	11.4675	12.0276	11.4455	11.9365	11.8479	11.9519	11.214	9.41635	10.5197	10.7054	10.4455	10.6539	11.1077	10.9563	11.2408	10.9761	11.1295	10.7997	11.196	10.9993	10.1196		9.29784	10.4152	9.25005	9.54819	9.09876	9.99257	7.98702	8.71883	9.02935	9.75939	10.4665	10.5281	10.7092	10.6691	10.7042	10.4236	10.8729	10.777	9.38298	10.8454	11.2254	11.3969	11.2803	11.2398	11.3586
1533.41	11.2733	10.675	11.1379	11.6936	11.109	11.5782	11.4925	11.609	10.8813	9.11694	10.2471	10.4188	10.1512	10.3569	10.7916	10.6482	10.9251	10.6643	10.8129	10.4741	10.9061	10.6861	9.82737		9.01828	10.1065	8.98911	9.27037	8.82373	9.69121	7.7297	8.43272	8.75409	9.46014	10.1606	10.2297	10.4013	10.3653	10.4104	10.1183	10.5779	10.4762	9.11032	10.5192	10.9173	11.0772	10.9459	10.9201	11.0502
1535.34	11.1316	10.5251	11.0012	11.5287	10.9465	11.4303	11.3343	11.4486	10.7337	8.97913	10.0758	10.2587	9.99269	10.1988	10.64	10.4985	10.7657	10.5018	10.6627	10.3289	10.7419	10.5421	9.68089		8.87794	9.95001	8.82742	9.12635	8.67317	9.56082	7.59462	8.29889	8.60516	9.31352	10.0057	10.0602	10.2452	10.2151	10.2641	9.97209	10.4148	10.3417	8.95528	10.361	10.7601	10.9116	10.8117	10.764	10.8898
1537.27	11.0566	10.4893	10.971	11.4886	10.9109	11.4177	11.3155	11.4175	10.7087	8.94182	9.99321	10.1995	9.9414	10.1239	10.577	10.4473	10.7173	10.4601	10.6173	10.2824	10.6861	10.4958	9.62241		8.82479	9.90387	8.76452	9.07698	8.63151	9.52348	7.55857	8.26127	8.56927	9.28193	9.96556	10.0187	10.1956	10.1469	10.2133	9.90848	10.3609	10.2853	8.88126	10.3156	10.735	10.8582	10.781	10.7095	10.8418
1539.2	10.5909	10.0757	10.5408	11.0624	10.4661	10.9702	10.8978	10.9862	10.2668	8.5344	9.63142	9.81442	9.56754	9.71637	10.1842	10.0269	10.2954	10.0519	10.1861	9.83395	10.3358	10.1125	9.2424		8.44896	9.49859	8.43006	8.68373	8.29362	9.12659	7.23018	7.88061	8.22412	8.89791	9.55875	9.66879	9.81001	9.72679	9.82549	9.49492	10.0099	9.88802	8.5075	9.92578	10.352	10.4641	10.3546	10.3021	10.4464
1541.12	10.2476	9.68993	10.1524	10.6714	10.0925	10.5584	10.5154	10.6017	9.88692	8.20075	9.32774	9.47474	9.22273	9.39158	9.86137	9.67438	9.93503	9.69364	9.82347	9.47748	9.99204	9.7571	8.90333		8.12624	9.14983	8.12875	8.35687	7.97282	8.77893	6.93595	7.5665	7.90682	8.55496	9.20234	9.32626	9.4594	9.39619	9.46446	9.16922	9.66259	9.52821	8.19148	9.56895	9.97471	10.1064	9.97824	9.94977	10.0887
1543.05	10.0779	9.50489	9.9543	10.4445	9.8989	10.3511	10.2917	10.3894	9.7006	8.0372	9.12673	9.28195	9.03284	9.20723	9.63914	9.48777	9.73249	9.49464	9.62664	9.29625	9.76645	9.55248	8.72724		7.96151	8.98349	7.94837	8.20236	7.79667	8.59827	6.76907	7.41841	7.72525	8.36767	9.01299	9.13008	9.2626	9.22382	9.27016	9.00103	9.45161	9.33411	8.03388	9.38984	9.7656	9.90108	9.78764	9.76117	9.88291
1544.98	9.8784	9.292	9.74256	10.2072	9.68679	10.1094	10.0401	10.1442	9.48281	7.84493	8.92197	9.05949	8.82248	9.01182	9.40951	9.27127	9.51543	9.27256	9.41012	9.09222	9.53861	9.33475	8.53857		7.77034	8.78433	7.75562	8.01898	7.59945	8.38913	6.59303	7.24363	7.52643	8.16261	8.7943	8.90794	9.04973	9.02095	9.06028	8.79724	9.2313	9.14508	7.86168	9.17806	9.52903	9.67465	9.56604	9.54197	9.64394
1546.91	9.73148	9.13108	9.58796	10.0551	9.51634	9.94897	9.88475	9.97847	9.34033	7.70935	8.74016	8.87758	8.64923	8.85837	9.24302	9.11334	9.35824	9.11092	9.25286	8.95249	9.35362	9.1662	8.37801		7.62308	8.62959	7.5906	7.87057	7.43714	8.23877	6.46215	7.11253	7.3797	8.03014	8.64606	8.72987	8.88484	8.86261	8.89127	8.64224	9.05372	8.99201	7.71049	9.01385	9.34436	9.50394	9.40927	9.36861	9.46776
1548.84	9.51734	8.93071	9.35821	9.8422	9.29658	9.73182	9.67056	9.75709	9.13445	7.51117	8.53489	8.66419	8.44671	8.65119	9.01616	8.90391	9.14538	8.90988	9.03914	8.74858	9.13528	8.94559	8.17604		7.43975	8.42861	7.40081	7.6651	7.24747	8.04747	6.29731	6.93761	7.19461	7.84308	8.44896	8.52615	8.68126	8.6575	8.68738	8.42858	8.85027	8.78243	7.51981	8.79424	9.14111	9.29047	9.1956	9.15367	9.25954
1550.77	9.2089	8.6272	9.0639	9.52519	8.98519	9.41593	9.35996	9.4385	8.82449	7.23017	8.26009	8.38194	8.16552	8.35806	8.7289	8.60383	8.84085	8.60512	8.74103	8.44959	8.84903	8.66174	7.90595		7.17505	8.15019	7.13673	7.37396	6.98736	7.77485	6.0562	6.67763	6.92652	7.55825	8.15381	8.24676	8.40306	8.37208	8.40386	8.14839	8.56986	8.50326	7.25991	8.50428	8.84725	8.99348	8.90017	8.86088	8.95741
1552.7	8.99111	8.44086	8.87051	9.32964	8.80361	9.22279	9.17804	9.24513	8.62348	7.07199	8.06	8.18587	7.97419	8.16313	8.52902	8.42552	8.65029	8.41523	8.55278	8.26342	8.64751	8.46974	7.7196		6.99897	7.9596	6.95799	7.2025	6.81797	7.59882	5.90049	6.51258	6.76445	7.39077	7.97045	8.05951	8.20799	8.17554	8.21247	7.96696	8.37307	8.30809	7.07844	8.32392	8.6552	8.79726	8.70578	8.66293	8.75867
1554.63	8.67735	8.15119	8.56435	9.02486	8.50359	8.91638	8.868	8.93547	8.321	6.8093	7.7727	7.90438	7.68864	7.87523	8.22453	8.15107	8.34847	8.13004	8.25929	7.97002	8.36455	8.19917	7.44631		6.74411	7.67809	6.70089	6.95575	6.57166	7.3246	5.66939	6.26137	6.51545	7.13283	7.68924	7.80194	7.93425	7.8888	7.93643	7.68688	8.10132	8.03336	6.81777	8.04477	8.37108	8.51603	8.41204	8.368	8.46603
1556.55	8.46887	7.96356	8.39408	8.82756	8.31085	8.74067	8.67452	8.75137	8.14424	6.63417	7.57935	7.70792	7.4949	7.67963	8.03334	7.96903	8.15524	7.94207	8.07797	7.78045	8.18757	8.04525	7.26254		6.5761	7.50597	6.5273	6.78344	6.418	7.14738	5.52353	6.10381	6.36073	6.97663	7.52724	7.64078	7.77881	7.69233	7.75624	7.497	7.94527	7.85916	6.64356	7.86006	8.21958	8.33085	8.23757	8.18599	8.28634
1558.48	7.79085	7.28948	7.69883	8.06437	7.55021	7.90123	7.82834	7.94152	7.34581	5.91266	7.01444	7.03972	6.86876	7.04223	7.33672	7.20762	7.42132	7.22523	7.33403	7.03409	7.59977	7.4072	6.62983		5.9703	6.85762	5.97885	6.17597	5.82698	6.4895	4.9747	5.51485	5.76836	6.30082	6.83823	7.01399	7.15708	7.05374	7.1114	6.8558	7.36133	7.2426	6.07169	7.18517	7.58084	7.65964	7.50402	7.53152	7.60263
1560.41	7.5418	7.00027	7.41737	7.76496	7.28887	7.62832	7.5577	7.66949	7.10821	5.73374	6.74924	6.78154	6.62209	6.79441	7.09198	6.9681	7.18407	6.98421	7.08356	6.8135	7.25679	7.08704	6.37725		5.73415	6.59962	5.74028	5.94838	5.58226	6.24949	4.78062	5.31663	5.52944	6.06612	6.58705	6.71115	6.83904	6.81233	6.82522	6.59527	7.02106	6.95158	5.82696	6.92426	7.22531	7.36761	7.24313	7.24497	7.31225
1562.34	7.44414	6.91269	7.31879	7.67902	7.20584	7.57553	7.52681	7.60294	7.05784	5.69702	6.62517	6.69838	6.53573	6.70391	7.00058	6.91455	7.10377	6.89951	7.0114	6.75232	7.1327	6.98947	6.29481		5.65844	6.51449	5.64163	5.86658	5.50496	6.1844	4.71114	5.25368	5.4466	6.00403	6.51377	6.61615	6.7384	6.72539	6.73841	6.51168	6.90275	6.85181	5.74564	6.85587	7.11326	7.26155	7.17514	7.14372	7.21391
1564.27	7.17762	6.67694	7.05337	7.42251	6.95762	7.31839	7.27391	7.34202	6.80982	5.48681	6.38566	6.46619	6.29708	6.47398	6.74728	6.68351	6.85052	6.6522	6.76394	6.51302	6.88448	6.74057	6.06504		5.44476	6.27757	5.42402	5.62877	5.29552	5.94983	4.5214	5.04852	5.23693	5.77627	6.27701	6.37311	6.49177	6.4852	6.49769	6.27999	6.66002	6.60756	5.54327	6.61175	6.8634	7.00287	6.92667	6.88316	6.95812
1566.2	6.86595	6.37197	6.75027	7.1075	6.65779	7.00513	6.95487	7.01925	6.50575	5.21945	6.09248	6.17491	6.00914	6.1808	6.45287	6.38591	6.54427	6.35354	6.45953	6.21556	6.58426	6.44936	5.78861		5.18686	6.00176	5.16489	5.35701	5.03836	5.6734	4.29289	4.79647	4.98162	5.4998	5.98989	6.08345	6.19741	6.19766	6.20566	5.99497	6.3677	6.31499	5.29443	6.31965	6.56774	6.70097	6.62904	6.57731	6.65287
1568.13	6.57084	6.09793	6.46063	6.80428	6.35928	6.70045	6.65045	6.71671	6.23933	4.96584	5.82719	5.89529	5.74768	5.90275	6.16926	6.09838	6.25694	6.07716	6.17745	5.93621	6.30909	6.17043	5.52466		4.94103	5.74315	4.92861	5.11733	4.80233	5.41871	4.08088	4.56529	4.74776	5.25305	5.7251	5.82873	5.92904	5.9244	5.92967	5.73137	6.09678	6.03879	5.04531	6.02804	6.30332	6.41342	6.33915	6.2936	6.36921
1570.06	6.09595	5.63584	5.9756	6.28293	5.85504	6.18058	6.14559	6.21184	5.76494	4.54884	5.4157	5.46549	5.32039	5.47563	5.71213	5.63576	5.78516	5.61649	5.70537	5.47971	5.87082	5.72565	5.11552		4.5479	5.30274	4.55312	4.71211	4.41285	4.98877	3.73172	4.19124	4.35775	4.83632	5.27893	5.40454	5.50096	5.48935	5.49429	5.30957	5.66745	5.61555	4.64838	5.58221	5.84952	5.94947	5.86966	5.84837	5.89815
1571.99	5.87624	5.41047	5.75026	6.05415	5.63982	5.96762	5.92981	5.9923	5.53841	4.37724	5.18508	5.25162	5.10226	5.25983	5.48794	5.4396	5.57344	5.40019	5.4901	5.277	5.63253	5.50559	4.9156		4.35831	5.0895	4.35594	4.51465	4.22334	4.791	3.56951	4.02043	4.17428	4.6467	5.07538	5.18731	5.28102	5.2688	5.27386	5.09974	5.44033	5.39874	4.45158	5.38148	5.6091	5.72211	5.66127	5.63897	5.66969
1573.91	5.62021	5.16589	5.47977	5.78481	5.39069	5.71009	5.67294	5.72851	5.26619	4.15384	4.92731	4.99662	4.85394	4.99944	5.22175	5.19048	5.31294	5.14152	5.23076	5.02092	5.37694	5.25202	4.67061		4.13303	4.84771	4.12064	4.28197	4.00918	4.56115	3.37041	3.80677	3.95856	4.41753	4.83717	4.94412	5.02479	5.00562	5.02012	4.85091	5.18938	5.14053	4.22273	5.13212	5.34669	5.44479	5.41177	5.37163	5.40756
1575.84	5.17493	4.7397	5.01359	5.29628	4.92016	5.21575	5.18646	5.24586	4.80044	3.75643	4.54819	4.57329	4.45489	4.59016	4.78841	4.73517	4.86231	4.71033	4.78312	4.57365	4.95487	4.82266	4.26781		3.76334	4.43224	3.76672	3.90364	3.6506	4.16368	3.04886	3.45191	3.60038	4.01901	4.41547	4.5375	4.60534	4.58775	4.60456	4.43709	4.77465	4.71638	3.8615	4.69596	4.91734	4.99071	4.96273	4.92255	4.96422
1577.77	4.76971	4.34528	4.62672	4.88708	4.5049	4.78968	4.75723	4.82246	4.41045	3.42358	4.1993	4.21277	4.09723	4.22968	4.40917	4.3491	4.47482	4.33224	4.39823	4.2023	4.5674	4.447	3.92126		3.44406	4.07496	3.45691	3.5757	3.33328	3.81902	2.77572	3.15501	3.28035	3.67557	4.04496	4.1793	4.23968	4.23882	4.23979	4.074	4.40276	4.35321	3.54416	4.32669	4.52043	4.61408	4.57084	4.54196	4.57266
1579.7	4.53097	4.12694	4.41681	4.65924	4.28432	4.56435	4.54026	4.59008	4.19894	3.25127	3.97235	4.00381	3.88322	4.01568	4.18431	4.14446	4.25905	4.11775	4.18438	4.00261	4.33289	4.229	3.71792		3.25979	3.87111	3.26217	3.39332	3.1539	3.62246	2.62635	2.99022	3.10252	3.49127	3.84388	3.96569	4.02158	4.03409	4.02288	3.8684	4.17805	4.13423	3.35735	4.11912	4.29044	4.39451	4.34974	4.32099	4.34865
1581.63	4.19604	3.80606	4.08293	4.30799	3.95022	4.21547	4.21261	4.2404	3.87585	2.97924	3.6648	3.68856	3.57321	3.71161	3.86167	3.8331	3.93053	3.79785	3.86013	3.68855	4.00304	3.90739	3.42073		2.98548	3.57005	2.98649	3.11842	2.8865	3.33631	2.39192	2.7319	2.84088	3.20888	3.53795	3.65703	3.70683	3.72567	3.70679	3.57043	3.85739	3.81888	3.08519	3.81041	3.96905	4.06771	4.02559	3.99268	4.01735
1583.56	3.89046	3.5091	3.77347	3.97659	3.63858	3.89161	3.89848	3.91861	3.57734	2.73047	3.38605	3.39817	3.29904	3.4248	3.55827	3.54344	3.62619	3.50206	3.55857	3.39713	3.69941	3.60932	3.15169		2.73875	3.29726	2.74679	2.85166	2.64344	3.06365	2.18112	2.50103	2.60326	2.94963	3.25944	3.37839	3.41817	3.43276	3.41539	3.28975	3.56515	3.52641	2.83591	3.51624	3.6725	3.75777	3.72121	3.68309	3.70722
1585.49	3.54163	3.18679	3.43413	3.62609	3.30334	3.53926	3.54643	3.56379	3.24877	2.45571	3.07788	3.08156	3.00202	3.09912	3.2269	3.21779	3.29416	3.17643	3.23251	3.07664	3.37147	3.27977	2.85498		2.46875	2.98881	2.47877	2.57907	2.37577	2.76308	1.94815	2.24433	2.34125	2.66078	2.95126	3.05974	3.10433	3.11084	3.10026	2.98188	3.24958	3.20904	2.55802	3.19297	3.3344	3.41471	3.38286	3.34401	3.37008
1587.42	3.23626	2.90638	3.14298	3.3236	3.02787	3.24043	3.2426	3.25981	2.96127	2.22527	2.8121	2.8062	2.74216	2.83106	2.94519	2.93665	3.00999	2.89813	2.94902	2.80011	3.08065	2.999	2.59945		2.23597	2.72407	2.24765	2.34918	2.15016	2.51135	1.75394	2.03262	2.12152	2.4181	2.68893	2.78711	2.83362	2.83444	2.83068	2.71741	2.97011	2.93298	2.31566	2.92594	3.04501	3.12968	3.09713	3.06004	3.07938
1589.34	2.90455	2.59002	2.80723	2.97044	2.70535	2.89317	2.88875	2.90959	2.63994	1.95797	2.51768	2.50379	2.43789	2.52667	2.62413	2.62048	2.68498	2.58486	2.62466	2.48873	2.76146	2.69291	2.31381		1.97547	2.43118	1.9912	2.07321	1.89426	2.22753	1.53407	1.79324	1.8689	2.14414	2.38514	2.49414	2.52661	2.52672	2.52426	2.41854	2.66094	2.62506	2.05108	2.61179	2.72713	2.8125	2.77251	2.73835	2.75185
1591.27	2.62376	2.31894	2.52829	2.68373	2.42188	2.60385	2.59282	2.62072	2.37771	1.7438	2.26069	2.25108	2.18936	2.26916	2.35796	2.35854	2.41583	2.328	2.35918	2.23449	2.48994	2.42792	2.07238		1.76411	2.18676	1.77862	1.84229	1.68658	1.99581	1.36593	1.59564	1.66341	1.91976	2.13738	2.24755	2.27144	2.27296	2.26719	2.1752	2.39786	2.36738	1.84057	2.34051	2.4594	2.53411	2.49398	2.46787	2.47996
1593.2	2.31052	2.02201	2.22447	2.35473	2.122	2.28286	2.27429	2.29988	2.06413	1.503	1.98568	1.96854	1.9306	1.99327	2.06736	2.06352	2.11529	2.03941	2.06522	1.94561	2.19233	2.13805	1.81209		1.52755	1.9097	1.54688	1.59554	1.4599	1.73614	1.17206	1.37484	1.43291	1.66783	1.86263	1.97612	1.99085	1.99245	1.98502	1.9016	2.11341	2.08853	1.60936	2.05363	2.1619	2.22839	2.19684	2.17428	2.1774
1595.13	2.04428	1.77698	1.96451	2.06843	1.86931	2.00897	1.99804	2.02654	1.81135	1.30543	1.76614	1.72901	1.70039	1.75869	1.82029	1.81723	1.8637	1.79422	1.81859	1.70529	1.93999	1.88963	1.59234		1.32859	1.66803	1.35203	1.38321	1.26987	1.51591	1.01028	1.19771	1.24649	1.46064	1.63663	1.74775	1.75071	1.752	1.74638	1.66736	1.87057	1.84146	1.40482	1.81489	1.90926	1.95967	1.94991	1.91898	1.91744
1597.06	1.76755	1.52256	1.6802	1.78555	1.59628	1.72497	1.71348	1.74134	1.55216	1.09982	1.52747	1.47693	1.45316	1.51537	1.55999	1.56166	1.60005	1.53793	1.55232	1.45845	1.6787	1.63523	1.36051		1.12054	1.42264	1.14083	1.1621	1.06628	1.2895	0.836656	1.00738	1.05025	1.24346	1.3968	1.49762	1.50317	1.50445	1.49994	1.42946	1.61487	1.58361	1.18711	1.56283	1.64584	1.68931	1.6832	1.652	1.64691
1598.99	1.54832	1.32441	1.46614	1.57088	1.38863	1.51322	1.50536	1.52585	1.3569	0.948157	1.33636	1.28288	1.26674	1.33068	1.35965	1.36917	1.40126	1.34601	1.35295	1.27332	1.46972	1.43131	1.18094		0.966083	1.23745	0.981454	1.01056	0.917153	1.11988	0.714635	0.869085	0.906957	1.07885	1.21421	1.299	1.30814	1.30872	1.30649	1.241	1.41593	1.38534	1.02683	1.36203	1.44634	1.48157	1.47788	1.45511	1.43952
1600.92	1.29522	1.10297	1.2327	1.32195	1.14401	1.2614	1.25648	1.26971	1.12217	0.760539	1.12726	1.06477	1.0615	1.11389	1.12942	1.13915	1.16495	1.11874	1.11836	1.04709	1.24048	1.19888	0.973869		0.785537	1.02717	0.803972	0.829204	0.745342	0.922634	0.569168	0.704453	0.733902	0.878187	0.998573	1.08226	1.08789	1.08647	1.08832	1.01934	1.19265	1.16183	0.838258	1.12858	1.21768	1.24103	1.23903	1.22782	1.20181
1602.85	1.11051	0.935828	1.05417	1.12067	0.962879	1.0673	1.06118	1.0771	0.949402	0.629916	0.969143	0.900197	0.899445	0.941403	0.951004	0.963391	0.98694	0.948816	0.94523	0.881272	1.06268	1.02298	0.821504		0.650697	0.867556	0.676359	0.689375	0.618942	0.766952	0.470731	0.584318	0.607686	0.736812	0.841247	0.920678	0.922944	0.91967	0.919598	0.855476	1.01493	0.990517	0.696749	0.956892	1.03485	1.05306	1.05646	1.05095	1.01942
1604.77	0.924178	0.753593	0.864036	0.911163	0.774783	0.856893	0.860257	0.875799	0.76725	0.494789	0.79172	0.722071	0.731366	0.758978	0.762677	0.775901	0.796475	0.766	0.76794	0.703196	0.871671	0.835297	0.65806		0.50404	0.706191	0.535725	0.542581	0.477951	0.601438	0.357433	0.45475	0.473541	0.590803	0.670802	0.749694	0.740104	0.740681	0.738238	0.685852	0.827679	0.80881	0.556912	0.782119	0.836711	0.853615	0.864096	0.856621	0.826756
1606.7	0.793262	0.629333	0.723574	0.77047	0.634706	0.713834	0.718217	0.728908	0.630112	0.404538	0.669681	0.595846	0.613733	0.635236	0.627582	0.642065	0.660622	0.638386	0.640646	0.576982	0.73895	0.709272	0.542921		0.412566	0.592724	0.442175	0.44249	0.388957	0.489557	0.285562	0.370043	0.391515	0.491443	0.553306	0.629635	0.610618	0.611807	0.614682	0.563468	0.69977	0.678274	0.473577	0.657525	0.705516	0.717136	0.732219	0.719141	0.693226
1608.63	0.614711	0.480892	0.557097	0.596557	0.465889	0.53964	0.535229	0.545844	0.471943	0.276775	0.529506	0.447428	0.464068	0.487591	0.467327	0.479427	0.499899	0.481949	0.477498	0.422805	0.582861	0.556464	0.399012		0.29374	0.438322	0.319734	0.311045	0.273428	0.350206	0.189527	0.260003	0.279624	0.36139	0.412822	0.482781	0.459605	0.459993	0.462107	0.4187	0.545901	0.523131	0.361718	0.494683	0.550751	0.550182	0.565949	0.551748	0.530876
1610.56	0.501696	0.394674	0.460863	0.504766	0.388654	0.441062	0.438294	0.451466	0.389704	0.217704	0.446742	0.36809	0.3886	0.406056	0.384916	0.397068	0.417982	0.400806	0.390499	0.341822	0.481617	0.45819	0.319922		0.226178	0.349236	0.256548	0.254658	0.210502	0.279853	0.152887	0.213999	0.222948	0.298095	0.342596	0.395606	0.377021	0.376738	0.370836	0.341306	0.449849	0.43226	0.291804	0.394442	0.452512	0.45298	0.466739	0.467538	0.437898
1612.49	0.385145	0.277408	0.338531	0.380387	0.283858	0.321157	0.32575	0.331936	0.274633	0.143778	0.334917	0.263733	0.288466	0.304435	0.280337	0.288199	0.306618	0.292789	0.279703	0.235253	0.369091	0.349773	0.23176		0.149229	0.256372	0.176529	0.179201	0.133085	0.185292	0.092188	0.142598	0.144108	0.208353	0.241813	0.287987	0.277523	0.273253	0.271231	0.243794	0.343876	0.330086	0.199219	0.296482	0.33371	0.336186	0.351976	0.35316	0.321005
1614.42	0.325796	0.210225	0.278089	0.293974	0.21597	0.250083	0.258614	0.25853	0.208203	0.107423	0.265801	0.196323	0.216013	0.236297	0.203635	0.222678	0.236924	0.22595	0.218573	0.174218	0.304461	0.292567	0.179297		0.112518	0.203801	0.127172	0.118587	0.093731	0.116478	0.066839	0.103071	0.108927	0.149819	0.189435	0.225436	0.213727	0.20359	0.208633	0.182659	0.282992	0.271035	0.147788	0.252993	0.263892	0.267767	0.286984	0.290844	0.249289
1616.35	0.198956	0.110884	0.158776	0.149251	0.093386	0.116959	0.130072	0.130247	0.102269	0.073297	0.184082	0.119334	0.10071	0.133535	0.084593	0.100572	0.111115	0.109295	0.108413	0.075166	0.194252	0.192939	0.102599		0.080152	0.100007	0.073016	0.063956	0.058688	0.013239	0.079981	0.052941	0.059016	0.07344	0.089712	0.130636	0.11495	0.110408	0.101938	0.087395	0.181879	0.169829	0.086011	0.154455	0.156223	0.139588	0.174297	0.189906	0.123808
1618.28	0.170309	0.10545	0.128227	0.144381	0.097165	0.105954	0.115216	0.117218	0.091899	0.057747	0.176063	0.099382	0.109766	0.130415	0.078701	0.084496	0.101966	0.107937	0.097965	0.067145	0.166492	0.167219	0.094395		0.071243	0.093243	0.069436	0.039174	0.04706	0.021894	0.060354	0.050753	0.053664	0.078531	0.08292	0.110553	0.103344	0.0923	0.095722	0.068159	0.156948	0.141507	0.068155	0.116856	0.143352	0.121556	0.168013	0.15536	0.110378
1620.21	0.130474	0.063569	0.07284	0.096044	0.068576	0.06811	0.083382	0.075575	0.052826	0.071918	0.120545	0.084687	0.072459	0.082754	0.045107	0.060048	0.061957	0.063142	0.060265	0.052672	0.119777	0.125552	0.072695		0.075094	0.080881	0.062969	0.051341	0.054326	0.020547	0.073898	0.049302	0.050722	0.050466	0.061387	0.072726	0.076666	0.057751	0.063567	0.049023	0.114032	0.104699	0.057347	0.065474	0.101717	0.066374	0.118922	0.105676	0.074087
1622.13	0.117523	0.064834	0.070139	0.070845	0.06876	0.073326	0.094257	0.078794	0.059959	0.100487	0.114545	0.111334	0.057612	0.080306	0.048046	0.071884	0.064053	0.058323	0.064225	0.074181	0.109077	0.116216	0.086137		0.095263	0.08928	0.080432	0.077888	0.075347	0.048856	0.092873	0.068455	0.068662	0.054976	0.074146	0.078981	0.083779	0.062703	0.068147	0.063191	0.111168	0.10697	0.070662	0.075531	0.092904	0.04691	0.106162	0.11058	0.071319
1624.06	0.065872	0.078083	0.074168	0.039287	0.085277	0.091282	0.125292	0.093034	0.102374	0.131311	0.086296	0.129552	0.045424	0.062052	0.077237	0.097894	0.073158	0.065265	0.084987	0.106287	0.084973	0.095763	0.096633		0.11918	0.106044	0.097387	0.095573	0.105418	0.089599	0.118172	0.089575	0.093894	0.07902	0.0828	0.081042	0.092306	0.084106	0.079555	0.087804	0.09009	0.090417	0.086781	0.090106	0.062983	0.019658	0.079586	0.079716	0.078042
1625.99	0.079936	0.061188	0.073967	0.043662	0.061858	0.076111	0.097298	0.081032	0.09203	0.100508	0.08857	0.118393	0.041834	0.049223	0.062346	0.082065	0.057843	0.058465	0.070669	0.086636	0.077177	0.098292	0.087654		0.103738	0.106613	0.082078	0.073593	0.088759	0.068183	0.096962	0.070717	0.080115	0.064507	0.072162	0.076816	0.076197	0.081785	0.074649	0.080511	0.087886	0.086869	0.078967	0.09048	0.060906	0.012873	0.07536	0.074918	0.07371
1627.92	0.072305	0.084727	0.066441	0.046404	0.09524	0.102684	0.107004	0.101736	0.117451	0.1182	0.0733	0.134554	0.036836	0.046398	0.090301	0.103484	0.077111	0.0708	0.090476	0.114894	0.069228	0.094764	0.108738		0.125855	0.11815	0.096834	0.113815	0.111192	0.101836	0.110852	0.091298	0.100679	0.082177	0.08916	0.079304	0.09561	0.100116	0.092472	0.108764	0.084852	0.092609	0.101028	0.114478	0.070343	0.042207	0.062142	0.069622	0.086996
1629.85	0.063685	0.062858	0.047155	0.040406	0.080601	0.085037	0.079056	0.081022	0.088986	0.09576	0.076863	0.115356	0.034479	0.050154	0.070082	0.072757	0.063898	0.051477	0.074949	0.087894	0.06979	0.090132	0.089312		0.105044	0.09493	0.082853	0.097222	0.089071	0.079533	0.084389	0.066855	0.077497	0.065124	0.077593	0.065898	0.085326	0.083271	0.072765	0.089012	0.081324	0.08389	0.090652	0.100484	0.062075	0.033211	0.063121	0.057321	0.068918
1631.78	0.054817	0.08964	0.075161	0.064838	0.116232	0.117929	0.111547	0.118119	0.117503	0.128537	0.077221	0.141449	0.05862	0.070247	0.109349	0.098856	0.098095	0.082556	0.108399	0.12248	0.078253	0.101559	0.116851		0.129965	0.114047	0.112616	0.119655	0.117309	0.115485	0.115424	0.094535	0.105643	0.091192	0.100178	0.093838	0.11604	0.117268	0.103742	0.114832	0.089079	0.096627	0.120909	0.125142	0.077149	0.060489	0.06786	0.070771	0.099189
1633.71	0.072956	0.135947	0.120015	0.095806	0.147436	0.152812	0.152361	0.165278	0.16687	0.166883	0.110147	0.192191	0.08954	0.111602	0.1542	0.150508	0.137635	0.127928	0.154875	0.164276	0.098711	0.1371	0.154068		0.177047	0.159945	0.148813	0.1538	0.152266	0.14939	0.161497	0.135678	0.141042	0.121119	0.124778	0.138193	0.154237	0.160229	0.139201	0.145224	0.119583	0.12677	0.162355	0.161415	0.119142	0.086045	0.098889	0.111443	0.138643
1635.64	0.099288	0.203921	0.189942	0.160625	0.239315	0.244582	0.240317	0.254083	0.255454	0.250962	0.133613	0.265072	0.150747	0.151384	0.226599	0.262555	0.212993	0.192268	0.235819	0.258753	0.141126	0.182511	0.21334		0.253622	0.22687	0.209998	0.216965	0.224625	0.227866	0.235751	0.201687	0.207101	0.195108	0.195233	0.195956	0.222958	0.2261	0.196079	0.202061	0.161297	0.179617	0.217605	0.21037	0.181642	0.157285	0.154332	0.164112	0.203929
1637.56	0.061158	0.10694	0.104901	0.07181	0.141179	0.14002	0.143607	0.147598	0.140946	0.146539	0.094745	0.165812	0.069342	0.069103	0.126954	0.145864	0.112376	0.098857	0.127452	0.149725	0.096772	0.123382	0.127158		0.158631	0.139327	0.126531	0.125325	0.137625	0.129243	0.138361	0.114442	0.116968	0.112833	0.118814	0.117551	0.135108	0.1338	0.112711	0.123722	0.108201	0.115031	0.128419	0.132849	0.106128	0.070363	0.087783	0.094478	0.116787
1639.49	0.054844	0.107337	0.105952	0.069143	0.128254	0.128759	0.13027	0.13242	0.125657	0.131156	0.075366	0.139979	0.059849	0.066555	0.114378	0.121681	0.10458	0.093743	0.112833	0.135348	0.085866	0.111528	0.116662		0.145519	0.134516	0.113002	0.119403	0.123616	0.124207	0.124681	0.104238	0.108046	0.099203	0.106441	0.102486	0.121716	0.117747	0.105454	0.124005	0.0963	0.101232	0.110559	0.133509	0.088665	0.064318	0.077877	0.094707	0.103931
1641.42	0.057601	0.091855	0.093245	0.057871	0.109795	0.110508	0.099445	0.107905	0.100738	0.109907	0.07266	0.131825	0.045184	0.060977	0.089037	0.094126	0.085375	0.073131	0.090297	0.110143	0.078901	0.101731	0.103659		0.125143	0.111576	0.097836	0.097802	0.102911	0.102951	0.107783	0.083215	0.089812	0.078859	0.089139	0.085993	0.101285	0.093775	0.092036	0.106937	0.087599	0.089059	0.10516	0.116212	0.074512	0.045786	0.069349	0.088581	0.085641
1643.35	0.082567	0.13844	0.12642	0.107349	0.163381	0.153211	0.154668	0.153917	0.150739	0.157884	0.092506	0.177032	0.088711	0.091832	0.139831	0.143083	0.131148	0.115848	0.138744	0.155074	0.097652	0.119628	0.145129		0.160843	0.152667	0.135161	0.13435	0.141178	0.143822	0.149016	0.124957	0.130902	0.122766	0.129619	0.118878	0.141737	0.130116	0.14172	0.152306	0.113491	0.121692	0.153795	0.14795	0.111357	0.104802	0.111143	0.122945	0.129198
1645.28	0.118994	0.181429	0.146144	0.164747	0.2299	0.199006	0.220305	0.197223	0.207206	0.206174	0.127331	0.223558	0.129002	0.122606	0.187303	0.197887	0.170086	0.155361	0.184471	0.201825	0.131656	0.151237	0.180603		0.20342	0.192565	0.171449	0.169559	0.177125	0.172546	0.186751	0.157176	0.17175	0.168424	0.171334	0.152158	0.185005	0.171401	0.182875	0.198017	0.143672	0.16321	0.193253	0.183047	0.147674	0.144007	0.162385	0.16785	0.16791
1647.21	0.137293	0.225779	0.190814	0.205936	0.27532	0.246126	0.289211	0.238958	0.23672	0.24332	0.134546	0.260974	0.149485	0.141039	0.22056	0.239475	0.203173	0.183681	0.228661	0.248575	0.159376	0.170412	0.209734		0.236486	0.222329	0.200647	0.219068	0.217472	0.210426	0.212702	0.188997	0.203312	0.191748	0.200243	0.182001	0.212494	0.208243	0.206921	0.223301	0.158066	0.185072	0.222798	0.205461	0.180869	0.164615	0.181577	0.189987	0.195611
1649.14	0.099936	0.161035	0.124919	0.105619	0.162651	0.157145	0.203704	0.157836	0.153513	0.157471	0.105797	0.196024	0.092718	0.103649	0.148937	0.142161	0.127973	0.116332	0.156133	0.163596	0.122058	0.133659	0.156375		0.169475	0.154321	0.149156	0.16656	0.151646	0.136178	0.148323	0.128833	0.138902	0.123756	0.13493	0.138677	0.150992	0.158469	0.140432	0.156272	0.124069	0.128714	0.167487	0.144845	0.127747	0.091851	0.122074	0.140556	0.13913
1651.07	0.159325	0.268207	0.20305	0.183914	0.262828	0.259534	0.322631	0.269901	0.260922	0.264585	0.183608	0.310215	0.201142	0.207489	0.249705	0.237322	0.241147	0.225996	0.272011	0.271975	0.179018	0.193367	0.244736		0.270901	0.246685	0.249075	0.27779	0.235824	0.233177	0.248966	0.216276	0.230315	0.23617	0.215583	0.234679	0.234539	0.264959	0.235592	0.255842	0.192547	0.194517	0.246033	0.254038	0.195591	0.200106	0.226845	0.243239	0.238499
1653	0.168766	0.298235	0.256327	0.216405	0.329825	0.335967	0.407897	0.328919	0.323327	0.347192	0.203234	0.391298	0.235899	0.222833	0.295324	0.329756	0.292067	0.257709	0.322447	0.341643	0.232531	0.248673	0.296413		0.339264	0.319578	0.289096	0.357221	0.284749	0.288773	0.313229	0.259011	0.269754	0.281146	0.260652	0.271149	0.284032	0.314754	0.273989	0.315266	0.235984	0.240238	0.286909	0.341295	0.217359	0.204817	0.276289	0.28281	0.278465
1654.92	0.095259	0.162079	0.14528	0.111507	0.194745	0.191457	0.205308	0.174619	0.177746	0.203474	0.108751	0.220639	0.110915	0.115303	0.165479	0.201166	0.151062	0.127713	0.166766	0.196702	0.132012	0.14961	0.173067		0.20338	0.192112	0.164823	0.190122	0.180024	0.176651	0.18397	0.148538	0.154316	0.145392	0.156051	0.140961	0.169026	0.172768	0.157211	0.193034	0.139302	0.145735	0.165061	0.195039	0.122109	0.092352	0.141275	0.154461	0.15675
1656.85	0.072809	0.09138	0.082476	0.050076	0.100429	0.097315	0.109038	0.090749	0.091341	0.107919	0.088262	0.127541	0.053282	0.068359	0.082473	0.096827	0.070991	0.06742	0.093322	0.101325	0.080094	0.103631	0.095767		0.123915	0.109626	0.096345	0.090679	0.102324	0.0888	0.104927	0.080422	0.08181	0.07392	0.085961	0.079464	0.093602	0.091166	0.085252	0.106625	0.09298	0.096287	0.101219	0.113564	0.073987	0.027541	0.090225	0.103845	0.083003
1658.78	0.067091	0.093959	0.082995	0.048795	0.105573	0.103709	0.126139	0.098655	0.100516	0.11408	0.080846	0.138025	0.054216	0.070664	0.091894	0.092072	0.081681	0.075011	0.098439	0.111515	0.07721	0.100984	0.10064		0.131361	0.108256	0.107296	0.110437	0.110324	0.098658	0.114281	0.08969	0.088995	0.083299	0.092265	0.088846	0.100789	0.102395	0.093196	0.10844	0.091086	0.098607	0.11745	0.121823	0.076206	0.043101	0.088698	0.097491	0.085947
1660.71	0.081359	0.085053	0.088798	0.064295	0.084632	0.104262	0.131819	0.102628	0.100739	0.112989	0.098116	0.143375	0.058938	0.070033	0.0881	0.087525	0.082358	0.076016	0.096289	0.108924	0.083571	0.108885	0.104204		0.128908	0.106498	0.108144	0.108796	0.10702	0.086999	0.117202	0.084936	0.090648	0.085118	0.097429	0.101554	0.103142	0.106285	0.09353	0.106004	0.098767	0.106023	0.125559	0.128247	0.081091	0.045019	0.098197	0.102264	0.093069
1662.64	0.078367	0.092484	0.109221	0.073217	0.10022	0.123722	0.139712	0.121806	0.133378	0.140182	0.100465	0.150308	0.066305	0.071121	0.101315	0.117961	0.097001	0.083758	0.10921	0.131294	0.085679	0.114094	0.120236		0.147049	0.132838	0.118744	0.130559	0.128925	0.101384	0.134368	0.104593	0.107512	0.098829	0.116815	0.109796	0.118546	0.123408	0.10557	0.117221	0.10453	0.116004	0.139008	0.131181	0.08462	0.057604	0.105644	0.117376	0.105786
1664.57	0.097911	0.074351	0.082164	0.087457	0.083634	0.085772	0.1015	0.090589	0.107376	0.097659	0.111643	0.099374	0.070139	0.075879	0.066359	0.0863	0.074078	0.074007	0.075865	0.079479	0.090557	0.104493	0.093311		0.109293	0.105255	0.088825	0.085848	0.089264	0.055723	0.094702	0.07715	0.073993	0.074121	0.090235	0.093402	0.089943	0.086244	0.077201	0.075371	0.102614	0.099217	0.094974	0.097987	0.089888	0.050777	0.103774	0.114466	0.088289
1666.5	0.090898	0.095149	0.085698	0.081752	0.100673	0.101486	0.097471	0.099856	0.114714	0.118864	0.094486	0.11999	0.070467	0.074623	0.085153	0.087043	0.083119	0.077575	0.097594	0.102723	0.090434	0.109625	0.104074		0.128562	0.118574	0.106073	0.094646	0.110315	0.078981	0.124465	0.099763	0.099774	0.092668	0.099465	0.097203	0.103706	0.0984	0.097492	0.095995	0.109538	0.104829	0.100566	0.112183	0.090325	0.046638	0.102604	0.120311	0.095475
1668.43	0.140552	0.128366	0.107668	0.112872	0.142996	0.133917	0.117036	0.129115	0.142496	0.136547	0.130639	0.159559	0.093384	0.10535	0.103525	0.101694	0.102519	0.102902	0.128719	0.122067	0.131437	0.14812	0.1288		0.160818	0.148946	0.127666	0.115118	0.126727	0.080853	0.151254	0.118387	0.12158	0.116915	0.124021	0.128224	0.125361	0.119632	0.114425	0.115517	0.149743	0.139572	0.129116	0.163512	0.117862	0.078514	0.141929	0.156453	0.121197
1670.35	0.138306	0.124296	0.099746	0.118278	0.139088	0.129342	0.134548	0.130001	0.137905	0.139272	0.142781	0.16556	0.091513	0.111807	0.101545	0.103938	0.10025	0.101356	0.1207	0.119389	0.133683	0.142838	0.132857		0.160839	0.141918	0.127385	0.126105	0.127135	0.080598	0.15672	0.115989	0.1218	0.113661	0.117392	0.121809	0.126408	0.117267	0.106648	0.119667	0.146646	0.135286	0.139476	0.16238	0.114595	0.083349	0.137056	0.150516	0.120981
1672.28	0.197304	0.115848	0.126258	0.1836	0.115181	0.151962	0.167475	0.146235	0.130332	0.104689	0.180692	0.150221	0.118199	0.142025	0.107912	0.127832	0.121828	0.131397	0.12792	0.094066	0.17427	0.176267	0.121564		0.118127	0.123036	0.109942	0.09159	0.094454	0.03568	0.114329	0.090204	0.094749	0.108032	0.120638	0.138226	0.128725	0.118037	0.114216	0.117355	0.174832	0.159942	0.128656	0.145105	0.148101	0.136328	0.168951	0.180575	0.146348
1674.21	0.222008	0.121274	0.13676	0.191167	0.126554	0.158753	0.16218	0.152795	0.135972	0.12448	0.189455	0.164781	0.118529	0.146881	0.11192	0.127725	0.12515	0.135024	0.134578	0.103208	0.190888	0.190801	0.127084		0.131868	0.132035	0.120821	0.093437	0.106262	0.040742	0.12737	0.100122	0.103756	0.116484	0.132179	0.153457	0.13411	0.120809	0.118507	0.118856	0.186418	0.173735	0.145967	0.159721	0.154521	0.136259	0.175665	0.187867	0.147153
1676.14	0.325438	0.196197	0.229837	0.295054	0.202929	0.242076	0.233231	0.245551	0.208302	0.127481	0.278514	0.1952	0.194679	0.234686	0.18514	0.185719	0.211969	0.223088	0.210087	0.159635	0.276011	0.265357	0.166941		0.128185	0.166709	0.143071	0.118393	0.107441	0.097305	0.106329	0.114097	0.126111	0.165064	0.197904	0.219301	0.193035	0.185461	0.181282	0.176612	0.254363	0.236381	0.170352	0.228084	0.24657	0.244592	0.265433	0.271187	0.230512
1678.07	0.345994	0.224956	0.263773	0.328687	0.235202	0.267588	0.260271	0.276959	0.232931	0.132062	0.289714	0.217411	0.211052	0.254901	0.214518	0.220147	0.239715	0.241954	0.229814	0.182765	0.311661	0.297517	0.187454		0.128667	0.183722	0.150499	0.120016	0.112673	0.121023	0.099982	0.114535	0.129241	0.170655	0.214071	0.234246	0.220323	0.21239	0.205719	0.196051	0.282091	0.262053	0.171015	0.24989	0.273605	0.279137	0.294506	0.291396	0.26294
1680	0.438779	0.314381	0.358942	0.425647	0.319132	0.366377	0.348284	0.369821	0.313421	0.187095	0.354375	0.291351	0.286196	0.31682	0.295303	0.315346	0.327784	0.324451	0.318369	0.260832	0.397564	0.38353	0.255682		0.188566	0.265935	0.205234	0.194438	0.168121	0.189857	0.13138	0.163428	0.181617	0.231609	0.297291	0.302957	0.295255	0.284967	0.279509	0.261375	0.367789	0.343362	0.22424	0.326526	0.363552	0.374106	0.383491	0.37269	0.355832
1681.93	0.463463	0.317021	0.361825	0.433224	0.299713	0.371588	0.341071	0.366869	0.309571	0.185004	0.346826	0.308034	0.275451	0.304371	0.285778	0.319591	0.319279	0.322214	0.315858	0.247869	0.42681	0.404311	0.270567		0.215232	0.286934	0.211734	0.22002	0.169441	0.175059	0.161609	0.158733	0.184426	0.227963	0.312186	0.318039	0.306945	0.289732	0.278365	0.270911	0.400655	0.370975	0.242431	0.339311	0.383205	0.382968	0.393326	0.389732	0.376071
1683.86	0.666221	0.466113	0.521283	0.622249	0.469263	0.539624	0.507046	0.544686	0.47599	0.299367	0.531983	0.442409	0.419464	0.476218	0.438646	0.458212	0.483513	0.505628	0.482558	0.383331	0.588642	0.56323	0.396689		0.31001	0.394506	0.32131	0.315929	0.267884	0.280984	0.239553	0.258068	0.292879	0.356695	0.459046	0.478214	0.457966	0.434098	0.418249	0.397944	0.567706	0.525358	0.34708	0.490124	0.571619	0.556606	0.56099	0.579989	0.548588
1685.79	0.811204	0.619945	0.692245	0.805291	0.647448	0.720605	0.712947	0.737554	0.636718	0.392362	0.673859	0.565892	0.585281	0.639281	0.624022	0.607898	0.655313	0.652422	0.642412	0.545494	0.727112	0.707737	0.514945		0.392964	0.532835	0.4183	0.418327	0.368345	0.44868	0.269607	0.349117	0.379864	0.479979	0.572175	0.61301	0.599298	0.595107	0.578273	0.537108	0.691292	0.657847	0.43845	0.636744	0.72353	0.727722	0.725548	0.718316	0.704228
1687.71	1.00143	0.82353	0.899902	1.02213	0.863259	0.945746	0.935174	0.968767	0.840912	0.554507	0.833221	0.739092	0.763176	0.817281	0.822096	0.816919	0.860471	0.844698	0.83901	0.75202	0.904106	0.889108	0.688353		0.545288	0.721933	0.564164	0.588049	0.515772	0.636739	0.388386	0.493407	0.527403	0.644775	0.747813	0.78192	0.780112	0.775577	0.765555	0.725032	0.862583	0.83138	0.584982	0.820955	0.908315	0.925248	0.923337	0.901775	0.899563
1689.64	1.19362	0.996226	1.08714	1.22653	1.04423	1.14732	1.12417	1.16785	1.02296	0.686983	0.987694	0.90549	0.927611	0.979424	1.00292	0.993178	1.03908	1.01358	1.01567	0.926369	1.07946	1.05932	0.83993		0.671188	0.883655	0.690502	0.711768	0.637425	0.785086	0.478162	0.604466	0.645664	0.786621	0.904125	0.946125	0.941663	0.941083	0.932603	0.885757	1.03372	0.99717	0.714447	0.989577	1.08033	1.11071	1.10255	1.07156	1.0788
1691.57	1.46211	1.23242	1.34842	1.5122	1.30545	1.43471	1.40909	1.44923	1.28295	0.888998	1.20273	1.14623	1.15263	1.20504	1.25631	1.24743	1.29473	1.25732	1.2662	1.17179	1.32586	1.30267	1.0567		0.864262	1.11068	0.87749	0.909422	0.828275	1.00222	0.632342	0.78101	0.830043	0.999856	1.14123	1.17246	1.17579	1.17464	1.16842	1.11536	1.27056	1.23257	0.913142	1.22382	1.33131	1.36595	1.35896	1.32285	1.33851
1693.5	1.63731	1.3712	1.50766	1.68353	1.4573	1.60499	1.57108	1.61617	1.43099	0.985897	1.33675	1.28208	1.28605	1.3476	1.40764	1.3888	1.43524	1.40057	1.40217	1.30103	1.49751	1.47451	1.19185		0.978403	1.25452	0.984264	1.03968	0.937956	1.12352	0.704969	0.871606	0.929896	1.11675	1.28811	1.31697	1.32931	1.31801	1.31492	1.25224	1.43738	1.39614	1.0383	1.37041	1.49934	1.52432	1.52141	1.49078	1.50124
1695.43	2.03376	1.71582	1.88217	2.07451	1.82084	1.99217	1.93878	2.00127	1.78005	1.26042	1.68284	1.61215	1.61169	1.70466	1.75778	1.71949	1.78792	1.75777	1.7548	1.62734	1.86618	1.83989	1.50402		1.24731	1.57594	1.25563	1.32759	1.20784	1.4202	0.922739	1.11927	1.20192	1.41	1.633	1.65466	1.66536	1.64254	1.6469	1.56662	1.79864	1.75613	1.32946	1.71056	1.87805	1.8937	1.88852	1.87143	1.87665
1697.36	2.35662	1.99755	2.20459	2.41755	2.12124	2.33334	2.29387	2.33359	2.07778	1.49682	1.94339	1.89404	1.88366	1.98609	2.05867	2.00567	2.09307	2.04173	2.05372	1.9078	2.1813	2.15656	1.7654		1.47179	1.8441	1.47532	1.55091	1.42765	1.67619	1.09642	1.31775	1.42251	1.64834	1.90689	1.93076	1.95216	1.91783	1.92796	1.84514	2.09623	2.05587	1.56457	2.00457	2.18414	2.21294	2.19079	2.17796	2.18922
1699.29	2.85393	2.42526	2.65987	2.88997	2.58125	2.80247	2.76753	2.81952	2.53892	1.85715	2.36511	2.28762	2.28213	2.40716	2.48374	2.44365	2.54125	2.49137	2.49656	2.32953	2.62188	2.58723	2.14685		1.80981	2.22728	1.83217	1.92907	1.76819	2.05551	1.38926	1.64593	1.7776	2.02976	2.32084	2.33265	2.35689	2.31378	2.33072	2.23852	2.5241	2.47002	1.91127	2.41462	2.61359	2.66057	2.62305	2.63378	2.63574
1701.22	3.45003	3.00891	3.25608	3.5211	3.19559	3.42692	3.37298	3.45623	3.11326	2.32625	2.93078	2.85163	2.82683	2.95759	3.08194	3.0194	3.14006	3.06822	3.09024	2.90938	3.19941	3.13434	2.67553		2.28799	2.76246	2.31172	2.43208	2.22922	2.57675	1.78287	2.08545	2.22939	2.52976	2.8502	2.88252	2.9235	2.88832	2.89956	2.78688	3.06918	3.02155	2.38072	2.98244	3.17321	3.25796	3.21907	3.21146	3.22929
1703.14	3.92396	3.49979	3.73909	4.04072	3.69527	3.95903	3.90593	3.97632	3.59084	2.75186	3.35105	3.32271	3.27665	3.39687	3.56309	3.49973	3.63084	3.52781	3.57957	3.392	3.6679	3.59702	3.118		2.70016	3.22686	2.70885	2.84249	2.62816	3.0235	2.13631	2.47635	2.62069	2.95954	3.31072	3.33269	3.39379	3.36895	3.37114	3.25148	3.52169	3.47355	2.78571	3.45608	3.66775	3.75073	3.70885	3.68029	3.72343
1705.07	4.47681	4.02742	4.27977	4.61975	4.23977	4.52761	4.46513	4.55067	4.12884	3.19827	3.86059	3.84062	3.78285	3.91473	4.10248	4.02196	4.17086	4.05989	4.11545	3.91033	4.21438	4.12514	3.60696		3.14338	3.7252	3.1493	3.30536	3.06318	3.50429	2.50711	2.89178	3.05089	3.42711	3.81549	3.83064	3.90086	3.89691	3.88929	3.75785	4.04567	3.98968	3.22889	3.9778	4.22074	4.30873	4.24444	4.22605	4.27173
1707	5.2162	4.74045	5.04273	5.41035	5.00901	5.31488	5.24711	5.34315	4.88261	3.8344	4.54031	4.54371	4.46422	4.61684	4.83774	4.76209	4.92352	4.79754	4.86399	4.64053	4.93133	4.82642	4.27205		3.76414	4.40492	3.76638	3.92934	3.66803	4.16179	3.05022	3.4805	3.65733	4.07734	4.51381	4.50819	4.59566	4.60298	4.59203	4.44333	4.74168	4.69252	3.84199	4.68974	4.94286	5.053	4.98368	4.96046	5.01023
1708.93	5.84061	5.34021	5.67523	6.05019	5.62787	5.95432	5.89286	5.98194	5.48716	4.34219	5.11083	5.13171	5.03551	5.19711	5.44106	5.36012	5.52709	5.38062	5.46594	5.22766	5.54169	5.43043	4.83719		4.28092	4.98326	4.28448	4.4417	4.17352	4.71725	3.49816	3.961	4.15198	4.60363	5.07853	5.08886	5.19381	5.19472	5.1853	5.02031	5.33986	5.29745	4.36811	5.28833	5.54995	5.66729	5.59808	5.57143	5.62906
1710.86	6.59402	6.06469	6.40971	6.82795	6.37042	6.73008	6.65865	6.74769	6.22323	4.97333	5.79209	5.82737	5.71505	5.88964	6.16643	6.07547	6.25127	6.09346	6.18525	5.93611	6.26647	6.14989	5.50921		4.90291	5.67897	4.90065	5.07306	4.78427	5.39562	4.04183	4.55145	4.75616	5.25143	5.76889	5.78414	5.89751	5.88669	5.89126	5.70756	6.05146	6.0062	4.9915	5.99859	6.28023	6.39377	6.33404	6.31022	6.37145
1712.79	7.2854	6.72638	7.07777	7.53868	7.03987	7.4339	7.35013	7.445	6.90129	5.54893	6.42788	6.47385	6.34724	6.52933	6.83191	6.72429	6.90585	6.74436	6.83543	6.57183	6.96037	6.83051	6.13747		5.48795	6.32005	5.46642	5.68738	5.35184	6.01387	4.53698	5.09142	5.31294	5.84608	6.40697	6.43865	6.55959	6.53071	6.54882	6.34864	6.73132	6.67171	5.58121	6.66649	6.9646	7.08198	7.01623	6.99126	7.05624
1714.72	8.1196	7.54994	7.91887	8.41383	7.89004	8.30746	8.22297	8.3213	7.73743	6.28121	7.21926	7.27003	7.13514	7.32216	7.65859	7.54423	7.73241	7.56827	7.65838	7.3667	7.7928	7.65257	6.90558		6.20932	7.099	6.18101	6.45312	6.06999	6.77987	5.18041	5.77128	6.02729	6.59636	7.2089	7.23067	7.36798	7.31243	7.34929	7.13203	7.55215	7.47198	6.3184	7.46082	7.80666	7.94745	7.84693	7.82725	7.9037
1716.65	9.04128	8.43262	8.84423	9.35516	8.80154	9.22124	9.14529	9.26068	8.61105	7.05965	8.09968	8.14323	8.00032	8.19686	8.56731	8.43312	8.63454	8.46632	8.54413	8.22972	8.68887	8.51819	7.73115		6.97742	7.93353	6.97905	7.23503	6.84905	7.60143	5.88234	6.50849	6.8036	7.39332	8.07909	8.08373	8.22615	8.17895	8.21029	7.97731	8.43434	8.33532	7.09465	8.31792	8.71075	8.85507	8.7215	8.73396	8.80966
1718.58	10.2595	9.57549	10.0401	10.5718	9.99358	10.4347	10.3492	10.493	9.79875	8.12223	9.21566	9.27157	9.1064	9.33692	9.72505	9.60932	9.83422	9.63635	9.72885	9.41067	9.80162	9.6149	8.81856		8.00755	9.03843	8.01361	8.28858	7.86186	8.68762	6.83395	7.52315	7.82825	8.46424	9.19898	9.16838	9.34115	9.31835	9.33234	9.09009	9.52809	9.44916	8.12401	9.44716	9.8477	10.0162	9.87271	9.89059	9.97755
1720.5	11.1063	10.3892	10.8762	11.4196	10.8112	11.2883	11.2157	11.3304	10.6257	8.86195	9.994	10.0889	9.89755	10.1464	10.5383	10.4047	10.6454	10.4194	10.5422	10.2186	10.6332	10.4563	9.6105		8.76733	9.87151	8.74458	9.04572	8.58423	9.46745	7.49696	8.23659	8.5354	9.22657	9.96549	9.97271	10.1646	10.1432	10.1535	9.90113	10.3486	10.2869	8.88046	10.2877	10.6613	10.8376	10.7146	10.7114	10.8028
1722.43	12.0278	11.2863	11.7951	12.3705	11.7381	12.223	12.1583	12.2683	11.5394	9.69425	10.8614	10.9882	10.7736	11.0315	11.4396	11.2983	11.5516	11.3105	11.4504	11.1132	11.5472	11.3542	10.4709		9.59232	10.7529	9.56427	9.87733	9.39605	10.3249	8.25122	9.02776	9.34012	10.0678	10.8375	10.8584	11.0541	11.0344	11.047	10.7735	11.2502	11.1853	9.70795	11.1872	11.5692	11.7439	11.6227	11.6272	11.7156
1724.36	13.0427	12.2699	12.806	13.3982	12.7409	13.2415	13.1644	13.2917	12.524	10.5965	11.8156	11.9626	11.7211	11.999	12.4256	12.2781	12.5452	12.2911	12.4441	12.0907	12.5455	12.3301	11.4136		10.4901	11.7042	10.4582	10.7887	10.2821	11.2612	9.07636	9.89593	10.2217	10.9807	11.7941	11.8253	12.0226	12.0062	12.0215	11.7366	12.2277	12.1643	10.6119	12.159	12.5585	12.7435	12.611	12.6313	12.7205
1726.29	14.0601	13.2599	13.8284	14.4238	13.7475	14.278	14.1827	14.3143	13.5207	11.5062	12.7762	12.9338	12.6723	12.9685	13.4168	13.2694	13.5359	13.2745	13.4362	13.0676	13.5436	13.3217	12.3668		11.4021	12.667	11.358	11.706	11.1789	12.212	9.91596	10.7771	11.1148	11.9108	12.757	12.7947	13.0051	12.9802	13.0005	12.7139	13.2124	13.1528	11.5232	13.1483	13.5547	13.7451	13.6137	13.6296	13.7279
1728.22	15.0136	14.2042	14.7861	15.4097	14.7046	15.2623	15.1559	15.2912	14.4723	12.3757	13.7023	13.8677	13.5975	13.8888	14.3688	14.2206	14.4736	14.2098	14.3684	13.9893	14.5149	14.2786	13.2815		12.2796	13.6062	12.2321	12.5922	12.0495	13.1221	10.7244	11.6111	11.9741	12.8012	13.6772	13.729	13.9554	13.9098	13.945	13.6397	14.1695	14.0942	12.4126	14.1067	14.5141	14.7069	14.5691	14.5867	14.6887
1730.15	16.0738	15.2744	15.8663	16.5248	15.8006	16.395	16.2776	16.4151	15.5618	13.382	14.7403	14.9132	14.6351	14.9238	15.4488	15.2994	15.5537	15.286	15.4475	15.0537	15.5892	15.3459	14.3054		13.266	14.6574	13.221	13.6154	13.0364	14.1526	11.655	12.5689	12.9607	13.8162	14.7337	14.7792	15.0129	14.9453	15.0022	14.6801	15.2287	15.1274	13.4072	15.1592	15.5987	15.7918	15.6509	15.6543	15.7817
1732.08	16.9586	16.1702	16.7503	17.4351	16.6908	17.2986	17.1994	17.3184	16.4426	14.1943	15.6188	15.7882	15.5148	15.797	16.3459	16.1574	16.4132	16.1629	16.3155	15.8991	16.5132	16.2374	15.1666		14.0961	15.5183	14.0469	14.4787	13.8716	15.0065	12.4263	13.3655	13.7765	14.6497	15.6058	15.678	15.8975	15.8074	15.8826	15.5476	16.1416	16.0013	14.2428	16.0358	16.524	16.6842	16.5444	16.5491	16.6897
1734.01	18.2455	17.3913	17.9988	18.7266	17.9586	18.5276	18.45	18.6083	17.6857	15.371	16.8489	17.0076	16.7154	17.003	17.5876	17.4214	17.6703	17.417	17.5629	17.1282	17.7436	17.3782	16.3492		15.2553	16.6814	15.2274	15.6766	15.0312	16.2014	13.5433	14.5089	14.9542	15.8058	16.8267	16.8325	17.1011	17.0117	17.0878	16.7246	17.3357	17.1932	15.4159	17.2222	17.7411	17.9185	17.7046	17.8118	17.9375
1735.93	19.3565	18.4561	19.1112	19.8196	19.0501	19.6362	19.5314	19.6975	18.7649	16.3791	17.8832	18.0678	17.7514	18.0592	18.653	18.484	18.755	18.4615	18.6408	18.2086	18.8093	18.4681	17.3882		16.2651	17.7574	16.2152	16.6686	16.0057	17.2456	14.4831	15.4933	15.9295	16.8272	17.8428	17.8706	18.1667	18.1006	18.1534	17.785	18.3904	18.2888	16.419	18.3162	18.7869	19.0134	18.809	18.8886	19.0068
1737.86	20.2476	19.359	20.0133	20.7326	19.9584	20.5502	20.442	20.6047	19.6595	17.2211	18.7511	18.9375	18.6342	18.951	19.5239	19.3637	19.6318	19.3362	19.5157	19.082	19.7093	19.3771	18.2504		17.1079	18.6468	17.05	17.5064	16.8503	18.114	15.2795	16.3193	16.7535	17.6874	18.7063	18.7725	19.0536	18.9844	19.0359	18.6579	19.288	19.1789	17.2557	19.2099	19.6937	19.9122	19.7194	19.7782	19.9033
1739.79	21.2899	20.3739	21.0543	21.796	20.9868	21.5869	21.4853	21.657	20.6833	18.2016	19.7739	19.9625	19.6415	19.9667	20.5731	20.3958	20.6594	20.3615	20.5426	20.0976	20.7482	20.3875	19.2532		18.087	19.642	18.033	18.5039	17.8245	19.1111	16.2192	17.2771	17.7239	18.6605	19.7162	19.7745	20.0782	19.9938	20.0545	19.6538	20.31	20.1963	18.243	20.2206	20.7253	20.9496	20.7263	20.8051	20.9434
1741.72	22.3429	21.4133	22.107	22.8586	22.0306	22.6615	22.5657	22.7231	21.7329	19.2067	20.7981	20.9999	20.6647	20.9815	21.6075	21.4336	21.7046	21.3997	21.5882	21.1358	21.7868	21.4192	20.2766		19.0936	20.6709	19.0185	19.508	18.8093	20.1265	17.1765	18.2533	18.7129	19.6731	20.7443	20.8003	21.118	21.0161	21.0903	20.677	21.3465	21.2211	19.2492	21.2632	21.7648	21.9944	21.7774	21.8515	21.9974
1743.65	23.2969	22.3658	23.0595	23.8285	23.0013	23.6362	23.5435	23.6962	22.6834	20.115	21.7406	21.9445	21.5972	21.9145	22.5561	22.3931	22.6567	22.3499	22.5373	22.0794	22.7507	22.3656	21.2144		20.0093	21.6245	19.9228	20.4321	19.7143	21.0651	18.0526	19.143	19.6165	20.5844	21.6745	21.7429	22.0694	21.9486	22.0411	21.629	22.2984	22.1615	20.1695	22.2117	22.7196	22.949	22.7353	22.8077	22.9618
1745.58	24.3163	23.3993	24.0798	24.8798	24.0571	24.6965	24.5822	24.7441	23.7311	21.0993	22.7384	22.9413	22.598	22.9074	23.5881	23.4235	23.6817	23.3702	23.563	23.0939	23.7653	23.3828	22.2088		20.9717	22.6299	20.8922	21.4251	20.6828	22.0586	18.9934	20.1054	20.589	21.577	22.6831	22.7508	23.0711	22.9443	23.0519	22.633	23.3114	23.1644	21.1544	23.2274	23.7497	23.9809	23.7695	23.8298	23.9889
1747.51	25.2085	24.3078	24.965	25.8163	24.9621	25.6187	25.4973	25.6772	24.647	21.9687	23.653	23.8477	23.5063	23.8019	24.4926	24.3326	24.5787	24.2642	24.4578	23.9804	24.6938	24.2984	23.1079		21.8499	23.5199	21.7866	22.3309	21.5686	22.9537	19.8424	20.9556	21.467	22.4561	23.5947	23.6721	23.9869	23.8384	23.9711	23.5318	24.236	24.0582	22.0544	24.1373	24.6815	24.9112	24.6759	24.7542	24.919
1749.44	26.1925	25.2631	25.9574	26.8041	25.9267	26.5759	26.4814	26.6656	25.6054	22.9141	24.6198	24.8166	24.4667	24.7727	25.4859	25.3045	25.5384	25.2329	25.4167	24.9385	25.6599	25.2308	24.0535		22.7938	24.4723	22.7396	23.2695	22.5133	23.9093	20.7653	21.8832	22.4112	23.3942	24.5641	24.6155	24.9498	24.7968	24.9301	24.493	25.1972	25.0116	22.9963	25.0928	25.6504	25.8717	25.6138	25.7234	25.8962
1751.36	27.1755	26.156	26.9398	27.7281	26.836	27.4593	27.3858	27.5718	26.5013	23.7903	25.5352	25.7334	25.3614	25.6963	26.3885	26.2067	26.4496	26.1315	26.3224	25.8535	26.5854	26.1197	24.9592		23.6934	25.3845	23.6385	24.1601	23.3863	24.8141	21.6226	22.7689	23.2836	24.2533	25.4497	25.4921	25.857	25.7419	25.8306	25.4187	26.1089	25.9663	23.8895	25.9991	26.5339	26.7736	26.4937	26.6451	26.8009
1753.29	28.1879	27.1308	27.9444	28.6991	27.801	28.4528	28.3628	28.5394	27.4755	24.727	26.4743	26.6826	26.3059	26.6661	27.3247	27.1583	27.4187	27.0802	27.2943	26.8299	27.5402	27.1037	25.913		24.6296	26.3533	24.5482	25.0767	24.3022	25.7645	22.5151	23.7085	24.1942	25.2035	26.3903	26.4482	26.8067	26.7211	26.7749	26.392	27.0625	26.9567	24.8144	26.9751	27.4827	27.7477	27.4919	27.6176	27.7609
1755.22	28.9942	27.9493	28.7384	29.5168	28.6055	29.2604	29.1759	29.3503	28.2961	25.5129	27.2798	27.4889	27.1171	27.4716	28.1287	27.9575	28.2143	27.8768	28.0839	27.6196	28.3644	27.9165	26.7185		25.4243	27.1663	25.3379	25.8715	25.0958	26.566	23.2772	24.4869	24.9754	26.0062	27.1861	27.2665	27.6187	27.5232	27.5827	27.1978	27.8802	27.7601	25.6048	27.8013	28.299	28.5524	28.2957	28.4286	28.568
1757.15	29.9268	28.8654	29.6462	30.4654	29.5266	30.188	30.1072	30.2924	29.2186	26.4159	28.1975	28.4064	28.0229	28.3706	29.0508	28.8966	29.141	28.8028	29.0038	28.5355	29.2834	28.8112	27.6267		26.329	28.0727	26.2441	26.7995	25.9932	27.4914	24.1605	25.3727	25.8774	26.8993	28.1033	28.1598	28.544	28.4237	28.506	28.1043	28.7877	28.6681	26.514	28.7076	29.2075	29.4725	29.1871	29.3514	29.4896
1759.08	30.776	29.7101	30.4942	31.3115	30.3658	31.0515	30.958	31.134	30.043	27.2305	29.0331	29.2369	28.8595	29.1997	29.878	29.7247	29.9663	29.6325	29.8374	29.3667	30.1254	29.6649	28.4586		27.1445	28.914	27.0516	27.6279	26.8078	28.321	24.9569	26.1847	26.686	27.7299	28.9322	29.0041	29.3797	29.2591	29.3426	28.9358	29.6351	29.5143	27.3342	29.5471	30.0531	30.3163	30.0469	30.1858	30.3267
1761.01	31.5398	30.4821	31.2654	32.0883	31.1441	31.8015	31.7258	31.9151	30.8081	27.9902	29.8151	30.0152	29.6344	29.968	30.6507	30.5001	30.7301	30.4046	30.5991	30.1345	30.9115	30.4092	29.2279		27.905	29.6785	27.8261	28.4103	27.5762	29.0897	25.7185	26.9354	27.4561	28.4836	29.7024	29.7676	30.1451	30.023	30.1198	29.6995	30.4103	30.2765	28.1145	30.3034	30.8196	31.0652	30.7834	30.9472	31.1006
1762.94	32.3942	31.2796	32.1114	32.9094	31.9508	32.6009	32.5365	32.7287	31.6149	28.7877	30.6239	30.8329	30.4356	30.7892	31.4655	31.3138	31.5435	31.2074	31.4111	30.9555	31.7291	31.2081	30.0372		28.7104	30.4926	28.6305	29.2134	28.3654	29.901	26.505	27.7319	28.242	29.2593	30.4997	30.558	30.9576	30.8451	30.9307	30.5278	31.2116	31.111	28.9245	31.1072	31.6072	31.8775	31.5763	31.7679	31.9072
1764.87	33.2309	32.1058	32.9459	33.7272	32.7648	33.4529	33.3759	33.5437	32.4448	29.5929	31.4265	31.636	31.2502	31.6047	32.2551	32.1122	32.3468	32.0105	32.2267	31.7738	32.5352	32.0405	30.8459		29.5072	31.3129	29.4091	29.99	29.1529	30.7001	27.2786	28.5357	29.0225	30.0702	31.3116	31.3779	31.7672	31.6587	31.7325	31.3517	32.0244	31.9291	29.7111	31.9368	32.4232	32.6995	32.4223	32.5872	32.7161
1766.8	33.9183	32.8354	33.6507	34.4664	33.4924	34.185	34.1049	34.2762	33.1695	30.3038	32.1608	32.3586	31.9833	32.3118	32.9834	32.8385	33.0552	32.7307	32.9431	32.4838	33.2679	32.7553	31.5636		30.2252	32.0319	30.1243	30.7124	29.8718	31.4224	27.985	29.2324	29.7415	30.7849	32.0378	32.0981	32.5025	32.3605	32.4612	32.0703	32.751	32.6208	30.4267	32.6538	33.1558	33.4207	33.1354	33.3021	33.4437
1768.72	34.6746	33.6594	34.4466	35.2992	34.3153	35.0191	34.9301	35.1059	33.9851	31.1129	32.9687	33.1548	32.7949	33.1035	33.8198	33.6639	33.8663	33.5581	33.7605	33.29	34.0682	33.5535	32.3584		31.0145	32.8311	30.9203	31.5338	30.6706	32.2343	28.7825	30.0156	30.5513	31.6003	32.8635	32.9127	33.3208	33.1411	33.2816	32.8707	33.5506	33.3946	31.2214	33.4372	33.9705	34.237	33.9591	34.1079	34.2633
1770.65	35.2726	34.3142	35.0563	35.9513	34.9614	35.6501	35.5838	35.7592	34.624	31.7443	33.6273	33.8013	33.4553	33.7429	34.454	34.2936	34.4824	34.198	34.3718	33.8952	34.7215	34.1665	32.9942		31.6404	33.4753	31.5754	32.1931	31.3293	32.8769	29.4245	30.6424	31.2095	32.2478	33.5209	33.5901	33.968	33.7736	33.931	33.5069	34.2078	34.0034	31.859	34.0753	34.6338	34.8573	34.5749	34.7574	34.9146
1772.58	35.9122	34.8863	35.683	36.5673	35.5692	36.1979	36.1629	36.3711	35.2202	32.3383	34.2526	34.4476	34.0519	34.3636	35.0974	34.9255	35.096	34.8058	34.9733	34.5059	35.3481	34.7211	33.6131		32.2647	34.0812	32.2132	32.8236	31.9423	33.4989	30.0464	31.251	31.832	32.8019	34.118	34.1637	34.5777	34.4048	34.5397	34.1133	34.8058	34.6201	32.4912	34.6792	35.2143	35.4391	35.0868	35.359	35.5165
1774.51	36.632	35.5379	36.3795	37.2092	36.2114	36.8436	36.8032	37.002	35.8768	32.9872	34.8993	35.1133	34.699	35.0315	35.7296	35.5747	35.7565	35.4472	35.639	35.1826	36.0073	35.4051	34.2826		32.9316	34.7628	32.8515	33.4565	32.5765	34.1583	30.675	31.9116	32.45	33.4413	34.7558	34.8123	35.236	35.0924	35.1951	34.7861	35.4672	35.3311	33.1541	35.3655	35.8561	36.108	35.7645	36.0099	36.1534
1776.44	37.324	36.2154	37.0602	37.8722	36.8709	37.5244	37.4704	37.6585	36.5493	33.6621	35.559	35.7691	35.3545	35.7003	36.3636	36.2435	36.4214	36.1114	36.3156	35.8636	36.664	36.0863	34.9495		33.5907	35.4295	33.4938	34.1027	33.2236	34.8186	31.3179	32.5812	33.0947	34.1059	35.4124	35.4806	35.8979	35.7627	35.8588	35.4702	36.1293	36.0191	33.8156	36.0398	36.5038	36.772	36.4498	36.6753	36.8119
1778.37	37.9236	36.8389	37.6622	38.476	37.4906	38.1437	38.075	38.2696	37.1648	34.2774	36.1779	36.3872	35.9693	36.3221	36.9949	36.8566	37.0248	36.7244	36.919	36.4713	37.2829	36.7111	35.5578		34.2066	36.0519	34.0998	34.7143	33.8389	35.4295	31.9235	33.1919	33.7022	34.727	36.0255	36.1172	36.5183	36.3775	36.4756	36.0818	36.7549	36.6274	34.4176	36.6624	37.1177	37.3769	37.0674	37.2909	37.4294
1780.3	38.4727	37.3899	38.2107	39.036	38.0423	38.6808	38.6085	38.8244	37.7141	34.8281	36.7458	36.9571	36.5286	36.8763	37.5365	37.4217	37.5797	37.2811	37.4665	37.0261	37.8456	37.2529	36.1122		34.7779	36.6152	34.6658	35.2941	34.4034	36.0021	32.4894	33.7416	34.2683	35.266	36.5783	36.6718	37.0928	36.9422	37.0442	36.6374	37.3183	37.1813	34.982	37.212	37.6682	37.9235	37.5912	37.8525	37.9839
1782.23	39.0773	37.9781	38.8124	39.6101	38.6255	39.2535	39.1833	39.3862	38.2769	35.3911	37.3304	37.5352	37.1091	37.4626	38.1216	37.9886	38.1476	37.8493	38.0469	37.6089	38.4201	37.8367	36.695		35.356	37.2086	35.2394	35.8693	34.9753	36.5802	33.0568	34.3203	34.8295	35.8367	37.151	37.2562	37.6756	37.5348	37.6256	37.2355	37.9024	37.7822	35.5696	37.8077	38.2441	38.4992	38.1739	38.4251	38.5531
1784.15	39.6043	38.495	39.3418	40.1218	39.1392	39.7513	39.692	39.8965	38.7948	35.9071	37.8521	38.0569	37.6299	37.9861	38.642	38.5102	38.659	38.3621	38.561	38.1276	38.948	38.3402	37.2166		35.8793	37.7349	35.7704	36.3934	35.4988	37.0984	33.5768	34.8412	35.3484	36.3537	37.6704	37.7774	38.1985	38.0614	38.1484	37.7599	38.4286	38.3094	36.0936	38.3389	38.7621	39.0082	38.6765	38.9472	39.0703
1786.08	40.1651	39.0317	39.8995	40.6575	39.6685	40.2854	40.2242	40.4283	39.3373	36.4485	38.3874	38.5962	38.1654	38.5358	39.1661	39.0582	39.1957	38.8998	39.0985	38.6756	39.4955	38.8844	37.7608		36.4205	38.268	36.3087	36.9295	36.0312	37.6443	34.1139	35.3867	35.8833	36.8808	38.2032	38.3029	38.7482	38.612	38.6949	38.3121	38.9721	38.8729	36.6396	38.8794	39.288	39.5431	39.2133	39.4966	39.6027
1788.01	40.7742	39.6899	40.5191	41.289	40.3123	40.9599	40.8794	41.0615	39.9806	37.0863	39.0043	39.2146	38.7979	39.1551	39.7987	39.6949	39.8257	39.5441	39.7444	39.3154	40.1071	39.5296	38.3789		37.0293	38.8939	36.9094	37.5418	36.6494	38.2625	34.7354	36.0142	36.5075	37.53	38.834	38.944	39.3715	39.2229	39.3155	38.9372	39.5919	39.4876	37.2504	39.4994	39.9287	40.1735	39.8763	40.1177	40.2305
1789.94	41.1986	40.2234	40.9687	41.8031	40.8396	41.4855	41.3931	41.5817	40.4971	37.5917	39.5159	39.7251	39.3297	39.6323	40.3293	40.2062	40.3204	40.0616	40.2456	39.7989	40.6174	40.0196	38.8736		37.5271	39.4058	37.4185	38.0688	37.1762	38.7612	35.2533	36.4976	37.0365	38.0639	39.3479	39.4916	39.8853	39.6892	39.8298	39.4111	40.1061	39.9298	37.7498	39.9941	40.4678	40.6803	40.3794	40.6085	40.7523
1791.87	41.5079	40.5387	41.2979	42.1518	41.1716	41.7675	41.6918	41.93	40.8383	37.9344	39.8765	40.1026	39.6719	39.9603	40.6886	40.5765	40.6614	40.4094	40.571	40.1205	40.9826	40.3003	39.2163		37.8918	39.7523	37.8025	38.4545	37.5486	39.1269	35.6309	36.8311	37.4182	38.3796	39.6871	39.8252	40.2539	40.032	40.1926	39.7465	40.4541	40.2449	38.1245	40.3249	40.7992	41.0021	40.6415	40.9598	41.1068
1793.8	41.9877	40.9567	41.7744	42.5664	41.5908	42.1774	42.1096	42.3403	41.2656	38.3639	40.3145	40.5465	40.0826	40.416	41.1375	41.0166	41.108	40.8407	41.0131	40.5694	41.4256	40.7537	39.6646		38.34	40.1928	38.2416	38.8865	37.9716	39.5681	36.0602	37.277	37.836	38.7868	40.1035	40.2399	40.6949	40.5017	40.6337	40.2079	40.8927	40.7332	38.5726	40.7745	41.2107	41.4357	41.0783	41.414	41.5302
1795.73	42.5051	41.47	42.2942	43.0546	42.0952	42.6881	42.6232	42.8253	41.7717	38.8675	40.8111	41.0347	40.5808	40.9338	41.6072	41.512	41.6063	41.3336	41.5185	41.0849	41.9249	41.2855	40.1739		38.8386	40.6993	38.7249	39.3722	38.4659	40.0652	36.5475	37.7851	38.3238	39.2952	40.5993	40.7445	41.1893	41.0165	41.1331	40.7167	41.4018	41.2612	39.0755	41.2962	41.7136	41.9408	41.6099	41.9222	42.0281
1797.66	42.9614	41.9199	42.7477	43.5061	42.5364	43.1431	43.062	43.2701	42.218	39.3203	41.2619	41.4778	41.0377	41.3896	42.0497	41.9598	42.045	41.7804	41.9641	41.5345	42.3768	41.7426	40.6243		39.2833	41.1477	39.1634	39.8124	38.9082	40.516	36.9964	38.238	38.765	39.7499	41.0472	41.2048	41.6397	41.473	41.5866	41.1674	41.8606	41.72	39.5196	41.7592	42.1687	42.3867	42.0691	42.3705	42.4785
1799.59	43.3026	42.2799	43.0938	43.8701	42.9025	43.4901	43.4165	43.6401	42.5883	39.6904	41.6393	41.8416	41.4068	41.7394	42.44	42.3306	42.4045	42.1516	42.3196	41.8828	42.7523	42.0825	40.9879		39.6579	41.5146	39.5488	40.1989	39.2855	40.8951	37.3837	38.605	39.1401	40.1118	41.4101	41.5841	42.0181	41.8387	41.9634	41.5292	42.2317	42.0672	39.8883	42.126	42.5437	42.748	42.4088	42.7243	42.8506
1801.51	43.6193	42.5751	43.4097	44.1594	43.213	43.7547	43.7013	43.9222	42.8812	39.9782	41.9502	42.1544	41.6997	42.0478	42.7375	42.6375	42.7012	42.4365	42.6064	42.1745	43.0888	42.3829	41.3057		39.9805	41.8252	39.8744	40.5183	39.5951	41.2063	37.6964	38.9196	39.4435	40.3859	41.7016	41.8828	42.3349	42.1536	42.2748	41.8439	42.5522	42.396	40.2135	42.4352	42.8416	43.0515	42.6871	43.0367	43.1558
1803.44	44.0882	42.9911	43.8648	44.5506	43.622	44.1563	44.1007	44.3053	43.2849	40.3835	42.3493	42.556	42.0925	42.4827	43.1298	43.0489	43.1079	42.8339	43.0205	42.5999	43.4977	42.8035	41.7202		40.3929	42.2364	40.2713	40.9059	39.9944	41.6031	38.0928	39.3488	39.8326	40.7859	42.1022	42.2696	42.7386	42.5776	42.6648	42.2626	42.9655	42.8505	40.6273	42.8527	43.2411	43.4575	43.1077	43.4639	43.5478
1805.37	44.5108	43.4035	44.2806	44.9377	44.0186	44.5558	44.4919	44.6914	43.6846	40.7841	42.7461	42.9526	42.4877	42.8871	43.5324	43.4497	43.5093	43.2315	43.429	43.0074	43.8971	43.2188	42.121		40.7892	42.6405	40.6611	41.2892	40.3871	41.9998	38.4892	39.754	40.2209	41.1836	42.4916	42.6639	43.1385	42.9773	43.0544	42.6662	43.3672	43.2703	41.0272	43.258	43.6396	43.8568	43.5219	43.8582	43.9436
1807.3	44.8729	43.8016	44.664	45.3358	44.418	44.9608	44.9	45.0871	44.0801	41.1873	43.1338	43.3437	42.891	43.2642	43.9218	43.8503	43.9095	43.6319	43.8254	43.3972	44.2874	43.6128	42.5007		41.1751	43.0268	41.0511	41.6863	40.7833	42.3913	38.891	40.1482	40.6241	41.585	42.8814	43.0594	43.5304	43.3489	43.45	43.0512	43.7561	43.6467	41.4125	43.6521	44.0411	44.2561	43.9268	44.2504	44.3467
1809.23	45.1435	44.1054	44.9587	45.6512	44.7203	45.2567	45.2107	45.3907	44.377	41.491	43.4427	43.6538	43.2011	43.5524	44.234	44.1586	44.21	43.9344	44.1149	43.6836	44.6008	43.9021	42.8001		41.4846	43.3278	41.361	42.0063	41.0991	42.6984	39.2004	40.442	40.9421	41.8857	43.1789	43.3646	43.8364	43.6424	43.7605	43.3452	44.0675	43.9337	41.7206	43.957	44.3513	44.5555	44.214	44.5592	44.6566
1811.16	45.407	44.3447	45.2198	45.9095	44.9615	45.4746	45.4421	45.6343	44.6185	41.7343	43.7063	43.9187	43.4505	43.8018	44.4991	44.4137	44.4584	44.1739	44.3538	43.9205	44.8734	44.1488	43.0633		41.7527	43.5943	41.6313	42.2783	41.3632	42.9616	39.4624	40.6948	41.2023	42.1239	43.417	43.6175	44.0959	43.9144	44.0198	43.6038	44.3306	44.2016	41.9967	44.2159	44.5997	44.8024	44.4392	44.8137	44.9126
1813.09	45.7662	44.6488	45.5728	46.2097	45.2592	45.779	45.7389	45.9324	44.932	42.0405	44.016	44.2271	43.7465	44.1361	44.7934	44.7184	44.7684	44.4732	44.6681	44.236	45.19	44.4794	43.3803		42.0631	43.9112	41.939	42.5837	41.6669	43.2738	39.7661	41.0219	41.4984	42.4325	43.7139	43.9218	44.4014	44.2524	44.3222	43.9273	44.6484	44.5568	42.3149	44.5354	44.9097	45.1168	44.764	45.1355	45.2224
1815.02	46.1156	44.9948	45.923	46.5323	45.5932	46.1184	46.0828	46.2638	45.2724	42.3806	44.3438	44.5504	44.0759	44.4745	45.1157	45.0511	45.0959	44.8035	45.0004	44.5734	45.5139	44.8114	43.7092		42.3938	44.2306	42.2656	42.9156	41.9961	43.599	40.0997	41.3689	41.8252	42.7721	44.0416	44.2466	44.7245	44.5894	44.6442	44.2555	44.9838	44.8977	42.6421	44.8725	45.2433	45.4486	45.1084	45.4724	45.5573
1816.94	46.3683	45.2453	46.1712	46.7739	45.8383	46.3568	46.3219	46.5087	45.508	42.624	44.6026	44.8082	44.3275	44.717	45.3744	45.3061	45.337	45.0468	45.2407	44.8115	45.7795	45.0687	43.9717		42.6622	44.4769	42.5326	43.1783	42.2541	43.8566	40.3622	41.6248	42.0808	43.0162	44.2855	44.4944	44.9848	44.8408	44.9048	44.5101	45.2457	45.1536	42.9064	45.1359	45.4945	45.7051	45.3506	45.726	45.8121
1818.87	46.6806	45.5291	46.4738	47.0659	46.1351	46.6523	46.6104	46.7979	45.7935	42.9154	44.891	45.0949	44.6097	45.011	45.6466	45.5987	45.6271	45.3353	45.5338	45.1014	46.0685	45.358	44.2583		42.9565	44.7708	42.8258	43.4569	42.5413	44.1517	40.6606	41.9251	42.3739	43.3095	44.5754	44.7803	45.2682	45.1219	45.192	44.7976	45.5318	45.4472	43.1988	45.4271	45.7835	45.9985	45.6459	46.0232	46.1002
1820.8	46.9916	45.8445	46.7858	47.3935	46.46	46.9932	46.9495	47.1244	46.1175	43.242	45.2049	45.4057	44.9245	45.316	45.9698	45.9216	45.9483	45.654	45.8606	45.4237	46.382	45.6784	44.5669		43.2633	45.0879	43.1384	43.7781	42.8561	44.4661	40.9799	42.239	42.6923	43.6301	44.8914	45.0951	45.5798	45.4252	45.504	45.1112	45.8431	45.754	43.5106	45.731	46.1051	46.3234	45.9816	46.3402	46.4208
1822.73	47.2387	46.1519	47.0517	47.6951	46.7551	47.3065	47.2618	47.4367	46.4189	43.5496	45.5012	45.6964	45.2397	45.5856	46.2759	46.2251	46.2431	45.9575	46.1547	45.7122	46.6715	45.9668	44.859		43.5489	45.3799	43.4357	44.0891	43.1678	44.7602	41.2871	42.5273	43.0026	43.9436	45.1939	45.4026	45.8752	45.6952	45.7954	45.3951	46.1393	46.0078	43.806	46.0203	46.4226	46.6242	46.2869	46.6319	46.7285
1824.66	47.3658	46.2837	47.1896	47.861	46.8942	47.4363	47.402	47.5976	46.5613	43.6933	45.6611	45.8549	45.3937	45.7287	46.4241	46.3922	46.3848	46.1036	46.2895	45.8496	46.8401	46.102	45.0244		43.7183	45.5179	43.6051	44.2772	43.3328	44.9311	41.4592	42.6712	43.1713	44.0708	45.3356	45.5463	46.0413	45.8357	45.9574	45.5411	46.2955	46.1482	43.9816	46.1611	46.5683	46.7836	46.402	46.7807	46.8881
1826.59	47.6938	46.6217	47.5227	48.1986	47.2456	47.7964	47.7381	47.9278	46.9023	44.0258	45.9789	46.1697	45.7139	46.055	46.7796	46.7137	46.7165	46.4375	46.6289	46.1839	47.152	46.4371	45.3457		44.043	45.839	43.9239	44.6005	43.6571	45.2544	41.7933	43.0065	43.4937	44.4239	45.6638	45.8764	46.358	46.1488	46.2689	45.8539	46.617	46.4732	44.2879	46.4888	46.9002	47.1189	46.7669	47.1079	47.2223
1828.52	47.8108	46.7876	47.643	48.3545	47.4053	47.9381	47.8795	48.0901	47.0519	44.1802	46.1501	46.3325	45.8913	46.1928	46.9294	46.8578	46.852	46.5811	46.7535	46.3103	47.3237	46.5633	45.4939		44.2052	46.004	44.1048	44.7721	43.8386	45.423	41.9668	43.156	43.6705	44.5916	45.8228	46.0529	46.5212	46.2955	46.4336	45.998	46.7837	46.599	44.453	46.6482	47.0785	47.261	46.9011	47.2649	47.3874
1830.45	47.8894	46.7889	47.7058	48.3884	47.404	47.9193	47.8838	48.1156	47.0603	44.1982	46.2005	46.3869	45.9155	46.2306	46.9691	46.9017	46.8769	46.5949	46.7643	46.3328	47.3972	46.5914	45.5519		44.2691	46.045	44.1618	44.821	43.8779	45.482	42.0125	43.198	43.7127	44.5696	45.8396	46.0588	46.5701	46.3575	46.489	46.0621	46.8287	46.6754	44.5281	46.6928	47.0854	47.295	46.8764	47.3147	47.416
1832.38	48.2386	47.0676	48.0294	48.6572	47.6639	48.2062	48.1657	48.3685	47.3363	44.4781	46.4651	46.6467	46.172	46.5293	47.2206	47.162	47.1545	46.8656	47.0543	46.6275	47.6645	46.9032	45.833		44.5412	46.3289	44.4117	45.0675	44.1344	45.7354	42.2654	43.4935	43.9553	44.8485	46.1065	46.3231	46.8229	46.6519	46.7419	46.3523	47.104	46.997	44.7931	46.9793	47.3414	47.5738	47.1842	47.593	47.6735
1834.3	48.5006	47.3221	48.2811	48.9011	47.9141	48.4637	48.4187	48.6091	47.5798	44.7322	46.7089	46.8787	46.414	46.7762	47.4286	47.3982	47.3957	47.1014	47.3024	46.8783	47.9003	47.1477	46.0687		44.7811	46.5797	44.6468	45.3066	44.3768	45.9687	42.5087	43.7449	44.1952	45.1074	46.3542	46.5618	47.0539	46.8917	46.974	46.5922	47.3447	47.2359	45.0372	47.2147	47.5825	47.8158	47.4444	47.8342	47.9125
1836.23	48.6483	47.4666	48.4339	49.0559	48.0641	48.6113	48.571	48.7663	47.7323	44.8813	46.8764	47.0381	46.5781	46.9327	47.5972	47.5542	47.5409	47.248	47.4493	47.0249	48.0686	47.3034	46.2303		44.9428	46.7398	44.8097	45.465	44.5405	46.1322	42.6762	43.9021	44.3612	45.2555	46.5114	46.7206	47.2111	47.0412	47.1333	46.7544	47.5072	47.3893	45.2114	47.3646	47.7383	47.9665	47.5896	47.9858	48.0658
1838.16	48.8238	47.6261	48.6212	49.2287	48.2278	48.7793	48.7518	48.9389	47.8975	45.0475	47.0463	47.2074	46.7443	47.1038	47.7538	47.7268	47.7086	47.4183	47.6179	47.1967	48.2433	47.4727	46.4131		45.1195	46.9021	44.984	45.6383	44.708	46.3116	42.8547	44.0807	44.5346	45.4095	46.6772	46.8826	47.384	47.2086	47.2992	46.9267	47.6742	47.5712	45.3895	47.537	47.9057	48.1324	47.7592	48.1549	48.2331
1840.09	49.1079	47.9452	48.914	49.5274	48.5322	49.1195	49.08	49.2441	48.2104	45.3574	47.3313	47.4922	47.0405	47.3814	48.0331	48.0168	48.0083	47.7233	47.927	47.5008	48.5201	47.7839	46.7019		45.4057	47.1847	45.2664	45.934	44.9995	46.6014	43.1476	44.3773	44.8214	45.7315	46.978	47.1846	47.6757	47.4859	47.5886	47.2126	47.9621	47.8479	45.6668	47.8316	48.212	48.4406	48.0981	48.4499	48.5251
1842.02	49.2408	48.1687	49.0665	49.7416	48.748	49.343	49.3021	49.4764	48.4368	45.5826	47.5396	47.6898	47.2791	47.5513	48.2568	48.22	48.2015	47.9388	48.1255	47.6844	48.7096	47.9667	46.8847		45.6009	47.3848	45.4798	46.1552	45.2308	46.8039	43.3717	44.5695	45.0452	45.976	47.2063	47.4187	47.8785	47.6478	47.798	47.3879	48.1645	47.9759	45.8553	48.0161	48.4459	48.64	48.3021	48.6403	48.7357
1843.95	49.1161	48.0479	48.9439	49.6679	48.6497	49.19	49.19	49.4043	48.3241	45.4792	47.4729	47.6283	47.1972	47.4521	48.1985	48.1554	48.0979	47.8435	48.0101	47.5711	48.6582	47.8292	46.8078		45.543	47.3042	45.4437	46.1041	45.1656	46.7498	43.3241	44.4767	44.9902	45.8473	47.1168	47.3142	47.8134	47.5604	47.7348	47.3042	48.0813	47.874	45.8002	47.9037	48.3455	48.534	48.128	48.5412	48.6582
1845.88	49.2686	48.1448	49.0659	49.7625	48.744	49.2798	49.2831	49.4856	48.4039	45.5668	47.5821	47.7402	47.2819	47.5713	48.2911	48.2529	48.2015	47.9326	48.1059	47.6781	48.7687	47.9509	46.9333		45.6625	47.4306	45.5543	46.1985	45.2615	46.8598	43.4261	44.5941	45.0813	45.9382	47.2102	47.4052	47.9124	47.6915	47.836	47.4381	48.1875	48.0218	45.9169	48.0237	48.4222	48.648	48.2351	48.6445	48.7488
1847.81	49.4769	48.3027	49.2512	49.9047	48.8743	49.4231	49.4195	49.6074	48.5402	45.7107	47.7442	47.8901	47.432	47.7543	48.4155	48.3803	48.3424	48.0619	48.242	47.8278	48.9186	48.1267	47.0955		45.8165	47.6012	45.6926	46.3452	45.4073	47.0075	43.5585	44.7564	45.2136	46.0936	47.351	47.5678	48.0594	47.8678	47.975	47.615	48.3531	48.2192	46.0807	48.2072	48.5639	48.7991	48.3988	48.8034	48.8858
1849.73	49.6605	48.4337	49.4262	50.0307	49.0026	49.5524	49.554	49.7295	48.6757	45.8499	47.8801	48.02	47.5672	47.917	48.5408	48.5077	48.4762	48.1922	48.3747	47.9709	49.0495	48.2686	47.2368		45.9528	47.7385	45.8157	46.4686	45.5363	47.1425	43.6881	44.9109	45.3374	46.2181	47.4805	47.6979	48.1903	48.0202	48.0966	47.7721	48.4879	48.388	46.228	48.349	48.6822	48.9295	48.5304	48.944	49.0107
1851.66	49.8123	48.5724	49.578	50.1649	49.1327	49.6858	49.6935	49.854	48.8075	45.9842	48.0148	48.1464	47.7037	48.058	48.6559	48.6345	48.603	48.3255	48.5069	48.1044	49.1761	48.4022	47.3772		46.0918	47.8748	45.9494	46.5945	45.672	47.2714	43.8269	45.0577	45.4676	46.3512	47.6162	47.839	48.3198	48.1593	48.2262	47.9108	48.6188	48.5289	46.3709	48.4781	48.8174	49.0589	48.6669	49.0755	49.1379
1853.59	49.9188	48.6802	49.6858	50.2857	49.233	49.7949	49.7988	49.9599	48.9167	46.0912	48.128	48.2542	47.8112	48.1688	48.7655	48.7475	48.7029	48.4274	48.6163	48.2148	49.2779	48.5048	47.4883		46.2049	47.9866	46.0603	46.7188	45.7804	47.3811	43.9408	45.1699	45.5793	46.4654	47.7245	47.9472	48.4266	48.2658	48.3364	48.0136	48.7248	48.6334	46.4843	48.5801	48.926	49.1667	48.7731	49.1873	49.2448
1855.52	50.0116	48.7893	49.7826	50.3864	49.3431	49.9079	49.9073	50.071	49.0276	46.2021	48.2428	48.361	47.9232	48.2792	48.8699	48.858	48.8068	48.539	48.7292	48.3289	49.3893	48.6187	47.6013		46.3122	48.1037	46.1714	46.8224	45.8882	47.4921	44.0489	45.2778	45.6911	46.5864	47.8426	48.0561	48.5401	48.3743	48.449	48.1174	48.8364	48.74	46.5943	48.6928	49.0262	49.2753	48.8815	49.2918	49.3517
1857.45	50.0824	48.8746	49.8561	50.4628	49.4338	49.993	49.9887	50.1615	49.1027	46.289	48.3356	48.4522	48.0133	48.355	48.9432	48.9447	48.8912	48.6315	48.8089	48.4153	49.4778	48.7085	47.6902		46.4005	48.2004	46.269	46.9122	45.98	47.5795	44.1397	45.3578	45.7811	46.6675	47.9321	48.1482	48.6315	48.4629	48.5443	48.202	48.9251	48.8222	46.6845	48.7876	49.1089	49.3522	48.9612	49.3689	49.4329
1859.38	50.1602	48.9578	49.9274	50.5298	49.4979	50.0583	50.0573	50.2307	49.1672	46.361	48.4139	48.5389	48.0957	48.4288	49.0298	49.013	48.9545	48.6993	48.872	48.4811	49.5497	48.7771	47.7622		46.4767	48.2815	46.35	47.0017	46.0626	47.6534	44.2212	45.4345	45.8552	46.7329	48.0021	48.2374	48.7152	48.5463	48.6262	48.2798	49.0029	48.9017	46.7554	48.8662	49.185	49.4174	49.027	49.4353	49.5015
1861.31	50.2422	49.0379	50.0098	50.6112	49.5679	50.1354	50.1296	50.3064	49.2551	46.4434	48.4932	48.6213	48.1779	48.5129	49.1039	49.0951	49.0297	48.7745	48.9544	48.5637	49.6301	48.8503	47.8397		46.5603	48.3531	46.4254	47.0768	46.1441	47.7396	44.3055	45.5175	45.9359	46.8138	48.0798	48.3151	48.8006	48.6298	48.7041	48.3712	49.082	48.9874	46.8409	48.9351	49.2582	49.495	49.0993	49.5086	49.5785
1863.24	50.3704	49.1807	50.1446	50.7686	49.7165	50.3002	50.2802	50.4534	49.407	46.5985	48.6387	48.7577	48.3339	48.6538	49.2355	49.2452	49.1793	48.927	49.1122	48.7193	49.7701	48.9991	47.983		46.6995	48.4959	46.5658	47.2111	46.2855	47.8815	44.4524	45.6644	46.0795	46.971	48.2321	48.4612	48.9417	48.7622	48.847	48.5234	49.2208	49.1205	46.9927	49.071	49.404	49.644	49.2589	49.6487	49.7171
1865.17	50.4821	49.3812	50.2784	50.9617	49.9183	50.524	50.4996	50.6553	49.5982	46.7923	48.8206	48.9336	48.5278	48.8068	49.4392	49.4395	49.3668	49.1334	49.3081	48.9018	49.9255	49.1731	48.1503		46.8633	48.6759	46.7416	47.4021	46.4781	48.0597	44.653	45.8428	46.2744	47.1811	48.44	48.6692	49.1173	48.9061	49.0321	48.6846	49.3882	49.24	47.1596	49.2403	49.6044	49.8318	49.4633	49.8213	49.9072
1867.09	50.3656	49.3872	50.1959	50.9489	49.904	50.4938	50.4989	50.6611	49.585	46.7721	48.8242	48.9443	48.5326	48.7638	49.4425	49.4343	49.3328	49.1247	49.2745	48.8494	49.9233	49.1348	48.134		46.8597	48.6644	46.7562	47.4276	46.5007	48.0611	44.6713	45.8015	46.2926	47.1827	48.4365	48.6975	49.1278	48.8675	49.0422	48.6467	49.388	49.1627	47.1484	49.2255	49.6278	49.8089	49.4113	49.8009	49.9102
1869.02	50.2008	49.1575	50.0108	50.7389	49.6667	50.2062	50.244	50.441	49.3528	46.5411	48.6524	48.7805	48.3304	48.5786	49.2561	49.2359	49.1123	48.8965	49.0385	48.629	49.7775	48.936	47.968		46.7028	48.4786	46.5994	47.2635	46.3038	47.8884	44.4864	45.5984	46.0994	46.9328	48.2124	48.5032	48.9644	48.7106	48.8734	48.4733	49.2215	49.0162	46.9941	49.0387	49.4172	49.5933	49.1407	49.6159	49.7028
1870.95	50.3707	49.2155	50.1455	50.7751	49.714	50.2549	50.2763	50.4667	49.4077	46.5998	48.7129	48.8455	48.3756	48.696	49.3084	49.286	49.18	48.946	49.1045	48.7147	49.8438	49.0323	48.0452		46.771	48.5623	46.6431	47.2979	46.3397	47.9484	44.5233	45.6982	46.1264	46.9748	48.2633	48.5547	49.0154	48.824	48.9241	48.5705	49.2932	49.1667	47.0608	49.1238	49.4401	49.6509	49.226	49.6827	49.7451
1872.88	50.5243	49.3296	50.2887	50.8651	49.8259	50.3718	50.3842	50.5555	49.5217	46.7208	48.8177	48.949	48.484	48.8352	49.3752	49.3928	49.2937	49.055	49.2188	48.8409	49.9421	49.1518	48.1484		46.8703	48.6802	46.7309	47.3888	46.4419	48.0462	44.6172	45.8252	46.22	47.0936	48.3702	48.656	49.1125	48.9478	49.0167	48.6927	49.4016	49.3082	47.1578	49.245	49.5323	49.7521	49.3537	49.7911	49.8393
1874.81	50.5661	49.3732	50.3376	50.9026	49.8641	50.4095	50.4162	50.587	49.5666	46.762	48.8632	48.9945	48.5322	48.8819	49.4224	49.4358	49.3345	49.1019	49.2608	48.8878	49.9831	49.197	48.1971		46.9106	48.7336	46.7736	47.4261	46.4832	48.083	44.6569	45.8685	46.2562	47.145	48.4077	48.7021	49.1612	48.9958	49.059	48.7486	49.4534	49.3616	47.2074	49.2962	49.5715	49.7938	49.3954	49.8344	49.8725
1876.74	50.5884	49.3986	50.3622	50.9275	49.8827	50.425	50.4326	50.6012	49.591	46.7781	48.8851	49.0205	48.5557	48.9016	49.457	49.4581	49.3531	49.1245	49.2838	48.9118	49.999	49.2144	48.2229		46.9363	48.7692	46.8026	47.4498	46.5096	48.1062	44.6807	45.8888	46.2761	47.1692	48.427	48.7364	49.19	49.0254	49.0888	48.7769	49.479	49.3824	47.2394	49.3219	49.5938	49.8169	49.4176	49.8551	49.8959
1878.67	50.5979	49.412	50.3811	50.9407	49.8982	50.4266	50.4507	50.609	49.5965	46.7826	48.9011	49.0386	48.565	48.9174	49.4548	49.4739	49.359	49.1284	49.296	48.9229	50.0159	49.228	48.236		46.9517	48.7899	46.8161	47.4705	46.5269	48.1196	44.6963	45.896	46.2877	47.1763	48.437	48.7584	49.2053	49.0402	49.1062	48.7884	49.4961	49.3978	47.2613	49.3348	49.6114	49.8239	49.4292	49.8722	49.9124
1880.6	50.6121	49.4253	50.4004	50.9495	49.9099	50.4375	50.4585	50.6205	49.6046	46.7954	48.9203	49.0544	48.5764	48.9335	49.478	49.4927	49.3716	49.141	49.3109	48.936	50.0372	49.2461	48.2563		46.9663	48.809	46.8296	47.4835	46.54	48.135	44.7174	45.9176	46.3055	47.1851	48.4527	48.773	49.2216	49.0582	49.1236	48.8032	49.5171	49.421	47.2774	49.3584	49.6307	49.8317	49.4461	49.8899	49.9268
1882.52	50.6187	49.4448	50.4013	50.9538	49.9293	50.4488	50.4701	50.6306	49.6267	46.8143	48.9334	49.0693	48.5932	48.9447	49.4918	49.5139	49.3875	49.1598	49.3249	48.9527	50.0515	49.2645	48.2669		46.9763	48.8182	46.8451	47.4872	46.5529	48.1499	44.7365	45.9359	46.3227	47.2	48.4654	48.7866	49.2371	49.0741	49.1413	48.8093	49.5358	49.4362	47.2901	49.3794	49.6435	49.8408	49.4637	49.8993	49.9395
1884.45	50.6137	49.4468	50.3909	50.9463	49.9339	50.4505	50.47	50.6285	49.6278	46.8206	48.9366	49.0778	48.5987	48.9416	49.4828	49.5281	49.397	49.1693	49.329	48.9556	50.0559	49.2752	48.267		46.9818	48.8089	46.8518	47.4959	46.5553	48.1556	44.7404	45.9346	46.3237	47.2033	48.4626	48.7895	49.2487	49.0776	49.1489	48.8109	49.5436	49.4414	47.289	49.3823	49.6437	49.846	49.4634	49.8966	49.9398
1886.38	50.6574	49.5118	50.4379	50.9993	49.99	50.5257	50.53	50.6842	49.6862	46.877	48.9931	49.1358	48.6627	48.9973	49.561	49.5859	49.459	49.2362	49.3943	49.0112	50.1009	49.3383	48.3201		47.0397	48.8686	46.9036	47.5525	46.6134	48.2104	44.7986	45.989	46.3769	47.2758	48.5271	48.8676	49.3119	49.1293	49.2107	48.8744	49.6043	49.4889	47.3258	49.442	49.7142	49.9028	49.5371	49.958	49.9965
1888.31	50.5527	49.446	50.3392	50.9245	49.9065	50.4305	50.4578	50.611	49.6103	46.7973	48.93	49.0775	48.5986	48.9137	49.4905	49.5162	49.376	49.1626	49.3084	48.9183	50.0311	49.2429	48.2468		46.975	48.8009	46.8442	47.4952	46.5566	48.1428	44.7426	45.9117	46.3134	47.2083	48.4536	48.8122	49.2513	49.0481	49.1519	48.8	49.5401	49.3913	47.2555	49.3658	49.6569	49.8205	49.4406	49.8841	49.9275
1890.24	50.4565	49.3273	50.2428	50.8075	49.7815	50.2898	50.3321	50.489	49.4931	46.6725	48.829	48.9873	48.4814	48.8124	49.3847	49.4188	49.2641	49.0471	49.1942	48.8036	49.9459	49.1415	48.1531		46.8729	48.704	46.7474	47.4034	46.4445	48.0416	44.6361	45.8097	46.2012	47.081	48.3339	48.6932	49.1558	48.9655	49.0544	48.7021	49.4454	49.3153	47.1756	49.2737	49.54	49.7237	49.3156	49.7868	49.8184
1892.17	50.524	49.3856	50.3057	50.8524	49.8445	50.356	50.3717	50.5287	49.5479	46.7327	48.8706	49.0209	48.5219	48.8752	49.4364	49.4693	49.3228	49.1052	49.2572	48.8711	49.9839	49.2104	48.2015		46.9103	48.7599	46.7815	47.4369	46.4838	48.0804	44.6725	45.8643	46.2388	47.1361	48.389	48.7395	49.1924	49.0229	49.093	48.7521	49.4969	49.3845	47.2248	49.3385	49.5878	49.7752	49.3904	49.8461	49.8678
1894.1	50.4561	49.3273	50.2399	50.7954	49.7876	50.2882	50.309	50.4718	49.4876	46.6769	48.8243	48.9691	48.4715	48.8189	49.3768	49.4171	49.2648	49.0481	49.1947	48.8135	49.9415	49.1629	48.1529		46.8649	48.7107	46.7337	47.3784	46.4383	48.0339	44.6218	45.8012	46.1872	47.0729	48.3278	48.6994	49.1437	48.9665	49.0499	48.6925	49.4557	49.3291	47.176	49.2899	49.5459	49.7234	49.3311	49.7953	49.8214
1896.03	50.3823	49.2363	50.1726	50.7015	49.6922	50.1842	50.2156	50.3771	49.3927	46.5789	48.738	48.8875	48.3854	48.7392	49.2987	49.3363	49.174	48.9538	49.102	48.7198	49.873	49.0864	48.0803		46.7854	48.6249	46.6543	47.2947	46.353	47.9492	44.5378	45.7185	46.0971	46.9799	48.2316	48.6216	49.0689	48.8963	48.9676	48.6095	49.3823	49.2663	47.0967	49.2095	49.4615	49.6441	49.2423	49.7125	49.7355
1897.95	50.3772	49.2156	50.1701	50.6632	49.6616	50.1565	50.191	50.3402	49.3672	46.5453	48.711	48.8642	48.3631	48.7266	49.2728	49.312	49.1483	48.9198	49.0794	48.6926	49.8565	49.0708	48.0606		46.7566	48.5922	46.6268	47.2692	46.3174	47.9144	44.5087	45.7005	46.0616	46.9582	48.2002	48.6037	49.0486	48.8846	48.9373	48.587	49.3632	49.2628	47.0676	49.1931	49.4342	49.6151	49.228	49.6888	49.7081
1899.88	50.3367	49.1766	50.1305	50.6215	49.6167	50.116	50.1516	50.2941	49.3281	46.4983	48.6686	48.8268	48.322	48.6888	49.2232	49.2787	49.1109	48.8787	49.0373	48.6531	49.8198	49.0313	48.0098		46.714	48.5599	46.584	47.2262	46.2711	47.8723	44.4714	45.6641	46.0186	46.9199	48.16	48.5619	49.0051	48.8423	48.8951	48.5451	49.3264	49.222	47.0283	49.1676	49.3929	49.5771	49.1897	49.6455	49.6696
1901.81	50.275	49.1182	50.0748	50.5605	49.5498	50.0527	50.0845	50.2296	49.259	46.4321	48.6093	48.7672	48.259	48.6253	49.1708	49.2249	49.0556	48.8256	48.9794	48.5945	49.7677	48.9739	47.9494		46.6546	48.5042	46.5215	47.1696	46.2128	47.8106	44.4103	45.6058	45.9565	46.8563	48.0958	48.4966	48.9456	48.7836	48.8336	48.4917	49.2766	49.172	46.9744	49.1262	49.3355	49.5223	49.1346	49.5926	49.6097
1903.74	50.2226	49.06	50.0243	50.4955	49.4948	50.0002	50.0243	50.1732	49.2004	46.3792	48.5577	48.7085	48.2013	48.5664	49.1183	49.176	49.0035	48.7757	48.928	48.5378	49.712	48.9218	47.8954		46.5969	48.4443	46.4606	47.1105	46.1573	47.7546	44.355	45.5516	45.8992	46.8042	48.0371	48.4411	48.8908	48.7302	48.7787	48.4374	49.2257	49.1226	46.9111	49.0736	49.2859	49.467	49.0845	49.5467	49.5589
1905.67	50.1675	49.0148	49.974	50.4482	49.4532	49.974	49.986	50.1392	49.1687	46.3423	48.5174	48.6665	48.162	48.5201	49.0711	49.1476	48.9669	48.7413	48.8917	48.4968	49.6725	48.8884	47.8481		46.5534	48.3979	46.4157	47.0625	46.1174	47.7164	44.3155	45.5056	45.8609	46.7744	48.0002	48.4059	48.851	48.6855	48.7391	48.3862	49.1865	49.0723	46.8624	49.025	49.2528	49.4289	49.0499	49.51	49.5235
1907.6	50.051	48.9259	49.8623	50.3536	49.3681	49.8808	49.8973	50.0535	49.08	46.2468	48.4283	48.5851	48.0802	48.4138	48.9977	49.0605	48.8745	48.652	48.7983	48.3948	49.5892	48.7965	47.757		46.4632	48.3061	46.3373	46.9814	46.0377	47.6323	44.2281	45.4044	45.7775	46.6875	47.9096	48.3297	48.7693	48.5902	48.657	48.288	49.1048	48.9651	46.7807	48.9416	49.1758	49.3436	48.9618	49.4247	49.4402
1909.53	49.9012	48.7687	49.7134	50.2001	49.2068	49.7016	49.7298	49.8893	48.9168	46.0767	48.2792	48.4456	47.9261	48.2588	48.8576	48.906	48.7151	48.4864	48.6317	48.2244	49.4595	48.6521	47.62		46.3204	48.1656	46.2016	46.8438	45.8892	47.4899	44.0756	45.2464	45.6236	46.5177	47.7451	48.1818	48.6286	48.4485	48.5176	48.1457	48.9677	48.8331	46.6511	48.806	49.0331	49.1987	48.8017	49.2776	49.2955
1911.46	49.8483	48.6815	49.6517	50.1091	49.0992	49.6081	49.6399	49.7833	48.822	45.9797	48.1876	48.3483	47.827	48.1884	48.7485	48.813	48.6244	48.3842	48.5375	48.1393	49.3728	48.5757	47.5396		46.2313	48.079	46.1043	46.7435	45.7894	47.3949	43.9775	45.1648	45.5183	46.4224	47.6416	48.0829	48.5333	48.3704	48.4218	48.0528	48.8832	48.7765	46.5615	48.7172	48.9424	49.1135	48.7196	49.1932	49.2024
1913.39	49.829	48.651	49.6394	50.0873	49.0749	49.5995	49.6258	49.7599	48.7992	45.9581	48.1552	48.3125	47.7922	48.1687	48.7189	48.7924	48.6054	48.36	48.5194	48.1241	49.3385	48.5591	47.5101		46.1964	48.0517	46.0622	46.6978	45.7548	47.3575	43.9445	45.1376	45.4789	46.3986	47.6105	48.0474	48.4995	48.3351	48.3855	48.0209	48.8542	48.7521	46.5243	48.6839	48.9144	49.0916	48.7168	49.1732	49.1751
1915.31	49.7647	48.6241	49.5833	50.0465	49.0527	49.579	49.5951	49.731	48.7749	45.9233	48.1104	48.2696	47.7605	48.1102	48.6894	48.7626	48.5706	48.3314	48.4868	48.0823	49.2939	48.5188	47.4585		46.1498	48.0097	46.0139	46.6546	45.7221	47.3125	43.9104	45.0902	45.4383	46.3764	47.5762	48.0195	48.4535	48.2726	48.3397	47.9715	48.8196	48.6847	46.4758	48.6386	48.8858	49.0517	48.6964	49.1303	49.1423
1917.24	49.5278	48.4059	49.3515	49.8314	48.8375	49.3405	49.3711	49.5222	48.5562	45.697	47.9018	48.0655	47.5524	47.8723	48.473	48.5576	48.3484	48.1151	48.2575	47.8534	49.1019	48.2893	47.2449		45.9463	47.7899	45.8171	46.4733	45.519	47.1071	43.7052	44.8628	45.237	46.1461	47.355	47.8106	48.2538	48.0533	48.1396	47.752	48.6158	48.4562	46.2771	48.4252	48.6778	48.833	48.4475	48.9165	48.9359
1919.17	49.415	48.2731	49.2442	49.7085	48.7155	49.2245	49.2509	49.3985	48.4321	45.5643	47.7775	47.9459	47.4216	47.7511	48.3676	48.4418	48.2328	47.9947	48.1441	47.7384	48.9732	48.1786	47.1245		45.817	47.6687	45.692	46.3404	45.3832	46.9882	43.5773	44.7414	45.1084	46.0178	47.231	47.6732	48.1259	47.9349	48.0164	47.6332	48.4883	48.3429	46.157	48.305	48.55	48.7178	48.3314	48.7979	48.8135
1921.1	49.3241	48.2062	49.153	49.6417	48.654	49.1588	49.196	49.33	48.3599	45.4969	47.7128	47.8718	47.3573	47.6785	48.284	48.3681	48.1646	47.9259	48.0714	47.662	48.8912	48.1163	47.0446		45.7392	47.6018	45.6169	46.2525	45.3171	46.9104	43.5066	44.667	45.0338	45.9593	47.1662	47.6113	48.0478	47.8557	47.9403	47.5496	48.4234	48.2601	46.0756	48.2343	48.4894	48.6495	48.2807	48.7236	48.7494
1923.03	49.1011	47.9433	48.9103	49.3979	48.3958	48.8772	48.9367	49.0773	48.0952	45.2389	47.485	47.6439	47.1122	47.4445	48.0472	48.1215	47.9124	47.666	47.8096	47.4042	48.6827	47.8862	46.8199		45.5187	47.3656	45.3982	46.0311	45.0794	46.6768	43.2668	44.4202	44.7906	45.6883	46.9084	47.3772	47.8255	47.6319	47.7126	47.3169	48.2058	48.0491	45.8556	47.9998	48.2439	48.4168	48.0221	48.4845	48.5151
1924.96	49.0457	47.8275	48.8413	49.2669	48.2636	48.7591	48.8066	48.9475	47.9707	45.1145	47.3597	47.5202	46.9918	47.3546	47.9357	47.998	47.7925	47.5382	47.6937	47.2924	48.5677	47.7888	46.7095		45.4007	47.2486	45.2738	45.8996	44.9487	46.5538	43.1361	44.32	44.6584	45.5732	46.779	47.2573	47.7039	47.5395	47.5827	47.2181	48.0902	47.9734	45.7428	47.9045	48.1251	48.3054	47.9205	48.3774	48.3908
1926.89	48.9423	47.722	48.7506	49.1578	48.1525	48.6628	48.6998	48.836	47.8625	44.9995	47.2412	47.4024	46.8769	47.2493	47.7964	47.8851	47.6827	47.4275	47.5831	47.1805	48.4527	47.6826	46.5955		45.2785	47.1367	45.1493	45.7762	44.8333	46.4359	43.015	44.2117	44.5374	45.4679	46.664	47.1362	47.5838	47.4316	47.4628	47.1158	47.9725	47.8708	45.6268	47.8015	48.0182	48.1922	47.8189	48.2607	48.2756
1928.82	48.7979	47.5867	48.6131	49.0208	48.0126	48.5304	48.5655	48.7012	47.729	44.8539	47.1026	47.2599	46.7351	47.1128	47.6626	47.7482	47.547	47.2904	47.4444	47.0385	48.3227	47.5463	46.458		45.135	47.0047	45.0065	45.6427	44.693	46.2925	42.8702	44.0727	44.3925	45.3223	46.5252	46.9978	47.4401	47.2935	47.3236	46.9797	47.838	47.7345	45.4846	47.662	47.8822	48.0617	47.6913	48.127	48.1387
1930.74	48.6455	47.423	48.4528	48.8684	47.8504	48.3722	48.4192	48.5425	47.5717	44.6927	46.9523	47.1001	46.58	46.9518	47.5116	47.5951	47.3899	47.1301	47.2887	46.883	48.1699	47.3896	46.3022		44.9812	46.8412	44.8532	45.4784	44.5337	46.1362	42.7146	43.9185	44.2367	45.1624	46.3692	46.8479	47.2772	47.1308	47.1629	46.8223	47.6851	47.5772	45.3303	47.5022	47.7298	47.9195	47.5408	47.9795	47.9876
1932.67	48.494	47.254	48.2888	48.7101	47.687	48.2055	48.2684	48.3763	47.4043	44.5283	46.7938	46.9402	46.4202	46.7826	47.3353	47.4307	47.2242	46.9622	47.1227	46.717	48.0146	47.2362	46.141		44.8187	46.673	44.6921	45.3061	44.3697	45.9746	42.5523	43.7525	44.0732	45.0049	46.2069	46.6853	47.1158	46.9683	46.9994	46.6583	47.5287	47.4189	45.1709	47.3439	47.5672	47.7605	47.3802	47.8251	47.8285
1934.6	48.3357	47.079	48.1188	48.5423	47.5104	48.0288	48.0933	48.2064	47.2281	44.3548	46.6225	46.7628	46.2471	46.6042	47.1662	47.2614	47.0558	46.7913	46.9519	46.5465	47.8511	47.0706	45.9698		44.6416	46.5097	44.5175	45.148	44.1946	45.7996	42.3767	43.5752	43.8957	44.8326	46.0333	46.5107	46.9439	46.8007	46.8296	46.483	47.3595	47.2515	44.999	47.1738	47.3894	47.5834	47.208	47.6462	47.6526
1936.53	48.1823	46.9236	47.9665	48.3889	47.3488	47.8784	47.9344	48.0571	47.0716	44.1966	46.4719	46.6055	46.0913	46.4515	47.0052	47.1089	46.9042	46.6389	46.7971	46.3975	47.6998	46.9224	45.8186		44.4863	46.3625	44.3637	44.9968	44.0367	45.6411	42.2175	43.4183	43.7317	44.6734	45.8741	46.3563	46.7911	46.6446	46.6709	46.3257	47.2051	47.0977	44.8433	47.0146	47.2327	47.4251	47.0544	47.4792	47.4959
1938.46	48.0465	46.8065	47.8356	48.2698	47.2376	47.7829	47.8332	47.9506	46.9623	44.0822	46.3403	46.4852	45.9702	46.3272	46.8773	46.9905	46.7891	46.5297	46.6869	46.2783	47.5691	46.8056	45.6951		44.3581	46.2399	44.2346	44.8569	43.911	45.5168	42.0972	43.2971	43.6093	44.5679	45.7591	46.2338	46.6653	46.5044	46.5478	46.196	47.077	46.9611	44.7206	46.8856	47.1186	47.3141	46.9487	47.3553	47.3788
1940.39	47.8551	46.6702	47.657	48.1234	47.0903	47.6468	47.6958	47.8117	46.8194	43.9294	46.1868	46.3319	45.8334	46.1549	46.7419	46.838	46.6321	46.3823	46.5326	46.1096	47.4103	46.6466	45.5341		44.2004	46.0903	44.0797	44.7019	43.7678	45.3622	41.9502	43.1302	43.4664	44.4333	45.6168	46.1006	46.5115	46.3344	46.4004	46.0278	46.9259	46.7706	44.5619	46.7363	46.9851	47.1701	46.8083	47.2027	47.2356
1942.32	47.523	46.3459	47.3383	47.8141	46.7615	47.3099	47.3627	47.4982	46.4825	43.5942	45.8893	46.0412	45.5303	45.8296	46.4394	46.5253	46.307	46.0528	46.1984	45.7774	47.1214	46.3308	45.227		43.9023	45.7894	43.791	44.4248	43.4656	45.0665	41.6512	42.8045	43.1651	44.0926	45.302	45.7984	46.2196	46.0238	46.1069	45.7185	46.6282	46.4526	44.2604	46.429	46.6794	46.8586	46.4701	46.894	46.9325
1944.25	47.3432	46.1359	47.1593	47.6105	46.5521	47.0951	47.1509	47.2805	46.2606	43.3785	45.6831	45.8397	45.3174	45.6424	46.2263	46.3159	46.1002	45.8415	45.9896	45.5741	46.9247	46.1411	45.0235		43.6986	45.5842	43.5817	44.2182	43.2478	44.8544	41.4353	42.6062	42.9474	43.8772	45.0917	45.5864	46.0114	45.8267	45.8961	45.5261	46.4267	46.2791	44.0533	46.2256	46.4653	46.6501	46.2632	46.696	46.7206
1946.18	47.1881	45.9597	46.9889	47.4265	46.3556	46.9073	46.9732	47.0917	46.0686	43.1906	45.5037	45.6545	45.1319	45.4776	46.0369	46.1286	45.9156	45.6529	45.8042	45.3915	46.7396	45.9664	44.843		43.5141	45.3996	43.3918	44.024	43.0582	44.6655	41.2374	42.4247	42.753	43.6931	44.902	45.4058	45.8188	45.6534	45.7026	45.355	46.2424	46.1192	43.8698	46.0348	46.2734	46.4729	46.0842	46.5145	46.527
1948.1	47.0196	45.7652	46.8037	47.229	46.1608	46.7166	46.7809	46.8973	45.8787	42.9944	45.3078	45.4562	44.9362	45.296	45.8384	45.9318	45.7219	45.4562	45.6115	45.2017	46.5396	45.7808	44.653		43.3156	45.2107	43.1944	43.8217	42.8606	44.4743	41.036	42.2349	42.5495	43.495	44.7066	45.2164	45.6178	45.4676	45.502	45.1699	46.0492	45.9372	43.6735	45.8395	46.0792	46.2845	45.8996	46.3215	46.3258
1950.03	46.8231	45.5594	46.6077	47.0274	45.9588	46.5188	46.5774	46.6944	45.6811	42.7916	45.1033	45.2466	44.7305	45.0906	45.6248	45.7268	45.5185	45.2553	45.4072	45.0005	46.3329	45.5781	44.4506		43.1035	45.0044	42.9867	43.6039	42.6547	44.2708	40.8255	42.0267	42.3387	43.2878	44.5037	45.0088	45.4102	45.2665	45.2968	44.965	45.8448	45.7354	43.4652	45.6442	45.8775	46.0788	45.702	46.1211	46.1196
1951.96	46.6207	45.3563	46.4019	46.8293	45.7549	46.3279	46.3794	46.4959	45.4851	42.5858	44.905	45.0483	44.5327	44.8822	45.4292	45.5264	45.3168	45.0577	45.21	44.7997	46.1277	45.3792	44.2503		42.8963	44.7998	42.7801	43.3949	42.4509	44.065	40.6195	41.8219	42.134	43.0936	44.3035	44.8024	45.212	45.0674	45.0974	44.7639	45.6439	45.5322	43.2638	45.4468	45.6719	45.8778	45.5037	45.9257	45.9193
1953.89	46.3815	45.1236	46.1634	46.5957	45.5186	46.0974	46.1487	46.2675	45.252	42.3459	44.6744	44.8225	44.3008	44.647	45.1934	45.2953	45.084	44.8214	44.9777	44.5687	45.8934	45.1525	44.0252		42.6679	44.5692	42.5476	43.1696	42.2179	43.8286	40.3876	41.5889	41.9048	42.8681	44.0705	44.5733	44.9832	44.8373	44.8681	44.5314	45.4171	45.2988	43.0366	45.2121	45.4391	45.6401	45.2689	45.686	45.6895
1955.82	46.1488	44.8934	45.936	46.3611	45.2861	45.8619	45.9215	46.0361	45.0188	42.1087	44.4434	44.593	44.0661	44.4174	44.9575	45.0603	44.8546	44.5835	44.7409	44.3374	45.6677	44.9237	43.7988		42.4375	44.3382	42.3199	42.9442	41.9831	43.5932	40.1523	41.3575	41.6695	42.6311	43.837	44.353	44.7572	44.6121	44.6426	44.3022	45.1908	45.0733	42.8065	44.9868	45.2094	45.4116	45.0376	45.4426	45.4555
1957.75	45.9189	44.6603	45.7083	46.1297	45.0615	45.6324	45.7004	45.8102	44.7877	41.8869	44.2192	44.3629	43.8428	44.1952	44.7337	44.83	44.6274	44.3586	44.513	44.11	45.4407	44.6971	43.5718		42.2054	44.1104	42.0897	42.7108	41.7522	43.3685	39.9198	41.1294	41.434	42.4031	43.612	44.1309	44.5301	44.3839	44.4165	44.0738	44.9602	44.8464	42.5773	44.7595	44.981	45.1858	44.8128	45.2075	45.2224
1959.68	45.6868	44.4266	45.4727	45.9004	44.8344	45.4029	45.47	45.585	44.5529	41.6611	43.9905	44.1398	43.6189	43.9683	44.497	44.6062	44.3994	44.1351	44.2864	43.8853	45.21	44.4709	43.3353		41.9788	43.88	41.8595	42.4772	41.5229	43.1406	39.6881	40.8969	41.2017	42.1803	43.3871	43.9053	44.3009	44.1522	44.1851	43.8414	44.7318	44.6174	42.3451	44.5244	44.7516	44.9603	44.5881	44.9763	44.9931
1961.61	45.456	44.1925	45.2271	45.6643	44.596	45.1715	45.2414	45.348	44.3145	41.4152	43.7516	43.9016	43.3771	43.7278	44.2565	44.3737	44.1638	43.9003	44.0535	43.6518	44.9701	44.2346	43.0879		41.7421	43.648	41.6196	42.2399	41.281	42.8974	39.4472	40.6566	40.9615	41.9414	43.1528	43.6679	44.0632	43.9189	43.9427	43.6078	44.4933	44.3805	42.1077	44.2808	44.5121	44.7247	44.3528	44.7452	44.7591
1963.53	45.2512	43.9997	45.0223	45.4685	44.4035	44.9943	45.0578	45.1572	44.1314	41.2157	43.5495	43.6978	43.1805	43.5289	44.0719	44.1773	43.9746	43.7111	43.8647	43.4549	44.7638	44.0407	42.8823		41.5349	43.4601	41.4134	42.03	41.0823	42.6934	39.2482	40.4566	40.7625	41.7522	42.9668	43.4756	43.8598	43.7211	43.7443	43.407	44.2885	44.1694	41.9022	44.0792	44.3201	44.5236	44.1679	44.5522	44.5627
1965.46	44.9498	43.7394	44.7321	45.1997	44.1349	44.7286	44.7954	44.8986	43.8713	40.9506	43.2886	43.4396	42.9234	43.2524	43.8034	43.9118	43.7047	43.4452	43.5948	43.181	44.5018	43.7714	42.6199		41.2703	43.1986	41.1547	41.7682	40.8267	42.4291	38.9926	40.1781	40.506	41.4919	42.7072	43.2222	43.5985	43.4468	43.4884	43.1308	44.028	43.8846	41.6379	43.8159	44.0684	44.2565	43.898	44.2797	44.2952
1967.39	44.6253	43.4178	44.4142	44.8868	43.8038	44.3909	44.461	44.5765	43.5359	40.6252	42.9819	43.1356	42.6109	42.9338	43.497	43.5863	43.3757	43.1193	43.2647	42.8564	44.2014	43.4586	42.3147		40.9626	42.8886	40.8471	41.4625	40.5077	42.1212	38.6785	39.8543	40.1902	41.1628	42.3821	42.9058	43.2934	43.13	43.1825	42.8258	43.7247	43.5817	41.3335	43.5043	43.7489	43.9438	43.5649	43.9568	43.9782
1969.32	44.4125	43.1761	44.1866	44.6408	43.5563	44.1425	44.2089	44.3224	43.2785	40.3758	42.7278	42.8843	42.3607	42.7082	43.2496	43.3318	43.1282	42.8708	43.0149	42.6121	43.9521	43.2192	42.0744		40.7109	42.6335	40.5935	41.2012	40.2486	41.8695	38.4156	39.6161	39.9304	40.9176	42.131	42.6574	43.0409	42.8954	42.925	42.5968	43.4761	43.3575	41.0809	43.2672	43.4897	43.6961	43.3272	43.7088	43.7267
1971.25	44.1956	42.9466	43.9627	44.4083	43.3258	43.913	43.9837	44.0891	43.0516	40.144	42.4921	42.6524	42.1294	42.4923	43.002	43.1027	42.9021	42.6408	42.7903	42.3845	43.7152	42.9913	41.842		40.4751	42.3951	40.3561	40.958	40.0125	41.6303	38.1724	39.3847	39.692	40.6927	41.9023	42.4359	42.8072	42.6757	42.6883	42.3615	43.2437	43.1321	40.8476	43.0438	43.2524	43.4652	43.1037	43.4822	43.4921
1973.18	43.9309	42.6801	43.6989	44.134	43.0564	43.6464	43.7156	43.8229	42.7964	39.8762	42.2316	42.3917	41.8635	42.2279	42.7445	42.8412	42.6425	42.3786	42.5327	42.1257	43.4523	42.7285	41.5773		40.2092	42.1315	40.0892	40.6919	39.7483	41.365	37.9062	39.1206	39.4254	40.4292	41.6397	42.1778	42.5489	42.4191	42.4261	42.0978	42.9804	42.8702	40.5869	42.7765	42.9891	43.1972	42.8372	43.2219	43.2272
1975.11	43.6734	42.4208	43.4395	43.8647	42.7902	43.3878	43.457	43.5594	42.5375	39.6113	41.974	42.1365	41.6013	41.9681	42.4828	42.5822	42.3824	42.1165	42.2718	41.8641	43.1927	42.4726	41.3195		39.9448	41.8766	39.8298	40.4276	39.4855	41.1038	37.6426	38.8595	39.1599	40.1706	41.3823	41.9111	42.2893	42.1595	42.1707	41.8429	42.7191	42.6131	40.3218	42.509	42.7363	42.9342	42.5726	42.9587	42.9652
1977.04	43.398	42.147	43.1684	43.5967	42.5226	43.1225	43.1876	43.2907	42.2622	39.3419	41.7	41.8652	41.3326	41.6974	42.2009	42.3085	42.111	41.8469	42.0024	41.5936	42.9164	42.2052	41.0469		39.6683	41.6052	39.5586	40.1526	39.2124	40.831	37.3665	38.5848	38.8852	39.9018	41.113	41.6354	42.0129	41.8871	41.9031	41.5671	42.4482	42.3403	40.0412	42.2402	42.4659	42.6637	42.3037	42.6881	42.6891
1978.97	43.1271	41.8742	42.9029	43.3383	42.2587	42.8608	42.9238	43.0291	41.9894	39.0795	41.436	41.597	41.0679	41.4311	41.946	42.0389	41.8472	41.5837	41.7434	41.3365	42.6488	41.9414	40.7802		39.4008	41.3415	39.2936	39.8854	38.9455	40.5632	37.1001	38.3182	38.62	39.6355	40.8476	41.374	41.7513	41.6214	41.6412	41.3029	42.1882	42.0754	39.7786	41.988	42.1969	42.3986	42.044	42.4225	42.4231
1980.89	42.8474	41.5988	42.622	43.0657	41.9853	42.5859	42.6507	42.7524	41.718	38.8022	41.1594	41.3222	40.7849	41.1567	41.6688	41.7678	41.5754	41.3141	41.4716	41.0645	42.3695	41.6668	40.5001		39.1232	41.0606	39.0138	39.6069	38.6695	40.2841	36.8274	38.044	38.3438	39.3624	40.5736	41.1026	41.4787	41.3469	41.3637	41.0315	41.9107	41.7972	39.507	41.7144	41.924	42.1223	41.7702	42.1406	42.149
1982.82	42.5742	41.3324	42.35	42.7915	41.7225	42.3199	42.3773	42.4855	41.4555	38.5332	40.8892	41.0596	40.5147	40.8897	41.3973	41.5048	41.3111	41.0541	41.2056	40.798	42.0982	41.4045	40.2303		38.8566	40.7894	38.7406	39.3365	38.3997	40.0136	36.5604	37.7762	38.0757	39.0991	40.3112	40.8438	41.2073	41.0813	41.0948	40.7596	41.6413	41.5318	39.2332	41.4362	41.6585	41.8527	41.5044	41.8744	41.8812
1984.75	42.303	41.0659	42.0817	42.5191	41.4592	42.0626	42.1104	42.2258	41.2012	38.2719	40.6214	40.794	40.2571	40.6195	41.1448	41.2388	41.0523	40.7936	40.9467	40.5383	41.8258	41.1429	39.9645		38.5895	40.5292	38.472	39.0669	38.1335	39.7489	36.2943	37.5047	37.8123	38.8373	40.0578	40.586	40.9412	40.8176	40.8296	40.4892	41.3729	41.2657	38.9544	41.1687	41.3978	41.5875	41.2457	41.614	41.6206
1986.68	42.0263	40.7974	41.803	42.2547	41.2052	41.8107	41.8498	41.9702	40.9437	38.015	40.3567	40.529	39.9995	40.3472	40.8807	40.9749	40.7975	40.5389	40.6898	40.2779	41.5545	40.8781	39.6989		38.3214	40.2667	38.2077	38.8036	37.87	39.4885	36.0291	37.2363	37.5523	38.5778	39.7974	40.319	40.6847	40.5498	40.5707	40.2234	41.1057	40.9893	38.6835	40.9052	41.1385	41.3291	40.9848	41.3505	41.3616
1988.61	41.7437	40.5307	41.5223	41.9958	40.9475	41.554	41.5967	41.7075	40.6776	37.7515	40.0855	40.2629	39.733	40.0745	40.6192	40.7083	40.5362	40.2789	40.4299	40.0101	41.2835	40.6124	39.4302		38.0503	40.0044	37.9377	38.5308	37.6046	39.218	35.7596	36.9663	37.2881	38.3204	39.5295	40.0524	40.4209	40.2758	40.3103	39.9457	40.8382	40.7071	38.4139	40.6404	40.877	41.0671	40.7276	41.0865	41.0983
1990.54	41.428	40.2383	41.2092	41.7039	40.6445	41.2536	41.3077	41.4125	40.3746	37.4522	39.7907	39.9717	39.4399	39.7712	40.3353	40.4167	40.2377	39.9795	40.1282	39.7102	40.9893	40.3104	39.1304		37.7551	39.7097	37.6483	38.2376	37.3133	38.9162	35.4684	36.6643	37.0005	38.0308	39.2318	39.7608	40.1198	39.9725	40.0163	39.6414	40.5453	40.396	38.1133	40.3451	40.5849	40.7659	40.4266	40.7867	40.8012
1992.47	41.0781	39.8725	40.8546	41.3329	40.2774	40.8743	40.9262	41.0477	40.0144	37.0816	39.4401	39.6202	39.0822	39.4225	39.9794	40.0561	39.8752	39.6095	39.7609	39.3481	40.6453	39.9615	38.7789		37.4091	39.3612	37.3041	37.8987	36.9565	38.5609	35.1141	36.3073	36.6481	37.6607	38.8693	39.4042	39.7713	39.629	39.6668	39.2937	40.1985	40.0547	37.7608	39.9845	40.2278	40.4057	40.0562	40.4284	40.4421
1994.4	40.8572	39.6223	40.6265	41.0731	40.0252	40.6246	40.6705	40.7929	39.7749	36.8359	39.1813	39.3605	38.8257	39.1887	39.7214	39.7976	39.6292	39.3612	39.5163	39.1039	40.3879	39.7196	38.525		37.1506	39.102	37.0387	37.6326	36.6916	38.3051	34.8481	36.0639	36.3868	37.4118	38.6175	39.1487	39.5129	39.3908	39.4074	39.0474	39.9412	39.8242	37.4994	39.7356	39.9769	40.1545	39.8146	40.1817	40.183
1996.32	40.6066	39.3683	40.3641	40.8113	39.7581	40.3639	40.4122	40.5311	39.5109	36.581	38.913	39.0928	38.5625	38.9278	39.4566	39.5299	39.368	39.1038	39.2584	38.8457	40.1171	39.4511	38.2593		36.879	38.8281	36.763	37.3541	36.4208	38.037	34.5802	35.8015	36.1188	37.1578	38.3523	38.8828	39.2409	39.1293	39.1376	38.7815	39.673	39.5629	37.2317	39.4748	39.7119	39.8905	39.5575	39.9105	39.9175
1998.25	40.3215	39.081	40.0812	40.5264	39.484	40.0831	40.1352	40.2523	39.2228	36.2992	38.6288	38.8145	38.2795	38.6489	39.1751	39.2443	39.0881	38.8245	38.9838	38.5672	39.835	39.17	37.9741		36.5964	38.5406	36.4795	37.0685	36.1406	37.7542	34.3004	35.5184	35.8351	36.8822	38.0727	38.6066	38.9613	38.8478	38.856	38.4987	39.3917	39.2782	36.9481	39.1953	39.426	39.6046	39.2799	39.6237	39.6391
2000.18	40.02	38.7845	39.7944	40.2397	39.1926	39.792	39.8464	39.9539	38.9258	36.0048	38.3314	38.5233	37.9809	38.356	38.8873	38.9568	38.8006	38.5373	38.6966	38.2761	39.5433	38.8826	37.6789		36.3044	38.2443	36.1884	36.777	35.851	37.461	34.0085	35.2279	35.5416	36.594	37.784	38.313	38.6706	38.5532	38.5621	38.2006	39.0978	38.9856	36.6491	38.9047	39.1346	39.3136	38.9854	39.3371	39.3465
2002.11	39.7481	38.517	39.5225	39.9712	38.9241	39.5219	39.5674	39.6778	38.654	35.7348	38.0523	38.2493	37.7037	38.0828	38.6179	38.6855	38.5334	38.2683	38.4291	38.005	39.2658	38.6067	37.4037		36.0249	37.9693	35.9137	36.5039	35.5744	37.1851	33.7307	34.9495	35.265	36.3214	37.5144	38.0378	38.3923	38.2805	38.2834	37.9259	38.8232	38.7124	36.3692	38.6279	38.8647	39.0461	38.7181	39.069	39.0737
2004.04	39.4601	38.223	39.225	39.6784	38.6462	39.2427	39.2803	39.3945	38.3748	35.4538	37.7648	37.9588	37.4211	37.7968	38.3258	38.3924	38.2527	37.9836	38.1464	37.7227	38.9782	38.3217	37.1172		35.7352	37.6824	35.6224	36.2091	35.287	36.8935	33.4397	34.6606	34.9784	36.0347	37.2289	37.7496	38.1042	37.9951	37.9911	37.6353	38.535	38.4202	36.0774	38.3331	38.5835	38.76	38.4345	38.7895	38.7873
2005.97	39.1772	37.9483	38.9393	39.4009	38.3747	38.9737	39.0138	39.1249	38.1062	35.1809	37.4868	37.6778	37.1444	37.5146	38.0554	38.112	37.9813	37.7103	37.8724	37.4451	38.7043	38.0493	36.8412		35.4586	37.4064	35.3462	35.9236	35.0128	36.613	33.1648	34.3896	34.706	35.7628	36.953	37.4711	37.8265	37.7165	37.716	37.355	38.2557	38.1406	35.7959	38.0578	38.3129	38.4829	38.1611	38.5183	38.5107
2007.9	38.882	37.6635	38.6483	39.1038	38.0781	38.6802	38.7167	38.8359	37.8191	34.8903	37.1888	37.3813	36.8473	37.2151	37.7651	37.8163	37.6931	37.4208	37.5805	37.1548	38.4092	37.757	36.5471		35.166	37.1031	35.0555	35.6287	34.7225	36.3177	32.8723	34.0925	34.4161	35.4741	36.6622	37.1753	37.5311	37.4209	37.4251	37.0651	37.9623	37.8501	35.4956	37.7671	38.0203	38.1904	37.8715	38.2245	38.2184
2009.83	38.6131	37.3847	38.3692	38.832	37.807	38.4062	38.4371	38.5627	37.5493	34.6192	36.9078	37.1055	36.5758	36.9465	37.4846	37.5458	37.4244	37.1463	37.3102	36.8887	38.1287	37.4821	36.2683		34.89	36.8271	34.7757	35.3577	34.4427	36.0408	32.5967	33.8175	34.1426	35.2053	36.388	36.9025	37.2531	37.1478	37.1473	36.791	37.687	37.5779	35.2206	37.4837	37.7427	37.9107	37.6011	37.9437	37.9468
2011.76	38.3313	37.1082	38.0834	38.5588	37.5384	38.1376	38.1649	38.2871	37.2791	34.3492	36.6262	36.8292	36.3002	36.6733	37.2108	37.2699	37.1531	36.8717	37.0417	36.6148	37.8448	37.2015	35.9837		34.6098	36.5481	34.495	35.0774	34.1634	35.7626	32.3225	33.5476	33.87	34.9345	36.1158	36.6244	36.9731	36.8686	36.866	36.5093	37.4012	37.2942	34.9374	37.1988	37.4676	37.6329	37.3283	37.6679	37.6751
2013.68	38.0631	36.8634	37.825	38.3082	37.298	37.9066	37.9217	38.0454	37.0442	34.1094	36.3746	36.5784	36.0451	36.4206	36.9649	37.017	36.9112	36.6363	36.8029	36.3708	37.5819	36.9541	35.7255		34.3564	36.2889	34.2453	34.814	33.916	35.5112	32.0743	33.2971	33.627	34.6961	35.8754	36.3689	36.7188	36.61	36.6147	36.2501	37.1427	37.0289	34.6785	36.9536	37.2279	37.3886	37.0862	37.4232	37.4306
2015.61	37.7467	36.5678	37.5174	38.0124	37.0096	37.6147	37.6324	37.7559	36.7538	33.8197	36.0779	36.2841	35.7496	36.1146	36.6741	36.7195	36.6193	36.3464	36.508	36.0778	37.2844	36.6545	35.4267		34.063	35.9861	33.953	34.5144	33.6268	35.2121	31.7848	32.9947	33.3385	34.4062	35.5863	36.0722	36.4224	36.3026	36.3202	35.941	36.8459	36.7178	34.3777	36.6639	36.9429	37.0984	36.7912	37.1322	37.1407
2017.54	37.4454	36.2636	37.2186	37.7036	36.6964	37.2977	37.3291	37.4471	36.4332	33.5091	35.7707	35.9754	35.4469	35.8073	36.3788	36.408	36.3134	36.0344	36.1993	35.7645	36.9822	36.3488	35.1258		33.7616	35.683	33.6509	34.2108	33.3228	34.9052	31.4813	32.689	33.036	34.0973	35.2768	35.764	36.1196	35.9979	36.0198	35.6329	36.5443	36.4174	34.0779	36.3539	36.6361	36.8018	36.4843	36.8312	36.8364
2019.47	37.1842	35.9928	36.9641	37.4324	36.4183	37.0232	37.064	37.1735	36.152	33.2392	35.4918	35.6975	35.1658	35.54	36.0987	36.1321	36.0425	35.7602	35.929	35.4917	36.6996	36.0804	34.8541		33.487	35.4093	33.3748	33.9354	33.0474	34.6321	31.2066	32.4226	32.7672	33.8269	35.0048	35.4835	35.8405	35.724	35.7388	35.3689	36.2689	36.1518	33.8075	36.0803	36.3601	36.5261	36.217	36.5531	36.5613
2021.4	36.9347	35.7391	36.7131	37.1827	36.1748	36.7782	36.8135	36.9234	35.9025	33	35.2344	35.438	34.9088	35.2911	35.8425	35.8755	35.7946	35.5087	35.6803	35.245	36.4376	35.8307	34.5989		33.2307	35.1405	33.117	33.68	32.7916	34.3779	30.9502	32.1702	32.5163	33.5776	34.7537	35.2267	35.5805	35.4721	35.4755	35.1145	36.009	35.8943	33.5504	35.827	36.1096	36.2718	35.9678	36.2997	36.3085
2023.33	36.6665	35.4608	36.4265	36.9079	35.9044	36.5117	36.5441	36.6539	35.6302	32.7355	34.9535	35.1537	34.6375	35.0172	35.5745	35.5923	35.5246	35.2353	35.4095	34.9737	36.1599	35.5551	34.3189		32.9531	34.8565	32.8396	33.4048	32.5156	34.1038	30.676	31.8939	32.2433	33.3066	34.4803	34.95	35.2974	35.1978	35.2001	34.8341	35.7258	35.6119	33.269	35.5422	35.8361	36.0013	35.696	36.0269	36.0346
2025.26	36.4056	35.1978	36.1703	36.6465	35.6455	36.2571	36.2893	36.3974	35.3785	32.4761	34.685	34.8881	34.3757	34.7495	35.3085	35.3282	35.2706	34.9818	35.1549	34.7157	35.8926	35.2909	34.0547		32.6889	34.5922	32.5797	33.1473	32.2543	33.8424	30.4171	31.6324	31.9858	33.0521	34.2237	34.6811	35.0334	34.9339	34.9385	34.5716	35.4622	35.347	33.0006	35.2695	35.5734	35.7384	35.4385	35.7706	35.774
2027.19	36.1238	34.9364	35.9077	36.3729	35.384	35.9908	36.0121	36.1279	35.1124	32.2024	34.414	34.6211	34.1019	34.4755	35.0411	35.0553	35.0051	34.7151	34.8897	34.4495	35.6176	35.0182	33.7814		32.4161	34.3163	32.3091	32.876	31.989	33.5694	30.149	31.3662	31.7164	32.7872	33.9583	34.4001	34.7599	34.6601	34.6649	34.2915	35.1883	35.0717	32.7209	34.993	35.3061	35.4691	35.1743	35.4989	35.506
2029.11	35.8591	34.679	35.6452	36.1124	35.1395	35.7415	35.7562	35.8775	34.8624	31.9563	34.1577	34.3651	33.8427	34.2218	34.7938	34.7984	34.7532	34.4598	34.6396	34.1991	35.3616	34.7631	33.5224		32.1636	34.0626	32.0513	32.6189	31.7346	33.3104	29.8965	31.1141	31.4624	32.5399	33.7102	34.1387	34.4954	34.3984	34.4065	34.0288	34.9261	34.8118	32.4649	34.7343	35.0532	35.2157	34.9247	35.2434	35.2495
2031.04	35.6046	34.4103	35.3717	35.8469	34.8822	35.4849	35.4931	35.6187	34.6094	31.7089	33.8888	34.0971	33.5828	33.9579	34.5252	34.5317	34.4947	34.2009	34.3778	33.9352	35.0939	34.5	33.2555		31.9022	33.7978	31.7895	32.3507	31.4689	33.0387	29.6353	30.8527	31.2031	32.2831	33.4489	33.8724	34.2253	34.1317	34.1389	33.763	34.6572	34.5419	32.1964	34.4705	34.7847	34.955	34.6648	34.9804	34.9868
2032.97	35.3634	34.1608	35.1207	35.6062	34.6419	35.2423	35.2469	35.3753	34.3668	31.468	33.6367	33.8415	33.3323	33.7107	34.2808	34.2782	34.2516	33.957	34.1345	33.6935	34.8441	34.2486	33.0032		31.6516	33.5407	31.5423	32.0896	31.2178	32.7855	29.3877	30.6061	30.9585	32.0384	33.2041	33.6211	33.975	33.8788	33.8842	33.5078	34.4031	34.289	31.9448	34.2134	34.5337	34.7034	34.4187	34.7307	34.7436
2034.9	35.1016	33.8954	34.8579	35.3577	34.3893	34.99	34.9987	35.1224	34.114	31.2142	33.3743	33.5819	33.0698	33.4508	34.0245	34.0164	33.9972	33.6997	33.8856	33.4439	34.5848	33.99	32.7452		31.3959	33.2799	31.2835	31.8281	30.9609	32.5275	29.1338	30.3529	30.7071	31.7855	32.9539	33.3622	33.7142	33.6168	33.6261	33.2512	34.1377	34.0258	31.6909	33.9489	34.2775	34.4381	34.1637	34.4735	34.4895
2036.83	34.8575	33.6506	34.6162	35.1335	34.1612	34.7646	34.7728	34.8953	33.8813	30.9824	33.1317	33.3439	32.8318	33.2043	33.7799	33.7767	33.7662	33.4659	33.6571	33.2098	34.3368	33.7512	32.504		31.1573	33.0419	31.0377	31.5918	30.7233	32.2922	28.8987	30.1171	30.4792	31.5551	32.7248	33.1199	33.4758	33.3764	33.384	33.0158	33.8896	33.7799	31.4483	33.7098	34.0431	34.2028	33.932	34.2321	34.2487
2038.76	34.6054	33.417	34.3631	34.896	33.9252	34.53	34.5355	34.6592	33.6358	30.7474	32.8839	33.0989	32.5929	32.9565	33.5393	33.5268	33.5294	33.2295	33.4202	32.9661	34.0835	33.5031	32.2558		30.9099	32.7967	30.7909	31.3458	30.4831	32.0504	28.6587	29.8721	30.2431	31.3203	32.4872	32.8706	33.2261	33.1278	33.1335	32.7634	33.6382	33.5281	31.1939	33.4653	33.8041	33.966	33.6931	33.983	34.0031
2040.69	34.3492	33.1673	34.1136	34.6486	33.6821	34.2828	34.2858	34.4131	33.3854	30.5053	32.6324	32.849	32.3482	32.7103	33.2967	33.2715	33.2852	32.9826	33.1709	32.7189	33.834	33.2526	32.0075		30.6596	32.5415	30.549	31.0957	30.2384	31.8015	28.4141	29.6265	29.9992	31.0722	32.2442	32.6115	32.9703	32.871	32.8835	32.5096	33.3854	33.2703	30.9478	33.2103	33.562	33.7169	33.4451	33.7338	33.7642
2042.62	34.0991	32.908	33.8721	34.3942	33.4318	34.0347	34.0374	34.1625	33.1446	30.2601	32.3794	32.5906	32.0925	32.4625	33.0422	33.0134	33.0379	32.7285	32.9205	32.4682	33.5779	32.9993	31.753		30.4081	32.2813	30.3032	30.8526	29.988	31.549	28.1623	29.3779	29.7509	30.8208	31.9985	32.3507	32.7154	32.6168	32.6289	32.256	33.1292	33.0156	30.694	32.957	33.3087	33.464	33.1936	33.4883	33.5166
2044.54	33.8836	32.6792	33.6497	34.1698	33.208	33.8203	33.8239	33.9429	32.9287	30.0449	32.15	32.356	31.8704	32.2403	32.8247	32.7869	32.8169	32.5099	32.7027	32.2498	33.3444	32.7739	31.5239		30.185	32.0428	30.0786	30.6418	29.762	31.3248	27.9394	29.1553	29.5332	30.603	31.7768	32.1299	32.4887	32.3935	32.3995	32.0264	32.8966	32.7886	30.4653	32.7245	33.085	33.2472	32.9745	33.2691	33.2873
2046.47	33.6523	32.4488	33.4072	33.9364	32.9697	33.5943	33.5931	33.7123	32.6896	29.816	31.907	32.1157	31.6366	32.009	32.5909	32.5451	32.5823	32.2801	32.4727	32.0223	33.1	32.5343	31.2841		29.9501	31.7982	29.8421	30.4085	29.5287	31.0866	27.7049	28.925	29.3027	30.3748	31.5446	31.8903	32.2469	32.1561	32.1623	31.7921	32.6533	32.5455	30.2265	32.4754	32.8477	33.0185	32.7464	33.0361	33.0496
2048.4	33.4305	32.2364	33.1895	33.7182	32.7493	33.3811	33.3849	33.5009	32.4692	29.6033	31.6829	31.8924	31.4068	31.7896	32.3667	32.3201	32.3652	32.0655	32.2596	31.8066	32.8714	32.3126	31.0614		29.7279	31.5757	29.6205	30.1777	29.3132	30.86	27.4866	28.7092	29.0878	30.1613	31.3293	31.661	32.0207	31.9287	31.9395	31.574	32.4276	32.3177	30.0005	32.2509	32.6244	32.8015	32.5277	32.8098	32.8339
2050.33	33.1983	32.0058	32.964	33.4964	32.5351	33.1615	33.1605	33.2784	32.2518	29.3872	31.4532	31.6646	31.1783	31.5553	32.1459	32.0905	32.1413	31.8408	32.0356	31.58	32.6385	32.0869	30.8315		29.4985	31.3462	29.3908	29.9416	29.0891	30.6279	27.265	28.4813	28.8675	29.9395	31.1056	31.4294	31.7911	31.6976	31.7051	31.3424	32.1911	32.0858	29.7699	32.0209	32.3981	32.5704	32.2953	32.5788	32.6077
2052.26	32.9771	31.7961	32.7427	33.2889	32.3344	32.9567	32.9445	33.0716	32.0488	29.188	31.2389	31.4536	30.9734	31.3441	31.93	31.8755	31.9353	31.6312	31.8315	31.3758	32.4158	31.8717	30.6177		29.2873	31.1311	29.1776	29.7152	28.8775	30.4176	27.0575	28.2736	28.6599	29.7367	30.9006	31.2105	31.5745	31.4821	31.4899	31.1271	31.9693	31.869	29.5572	31.8029	32.1883	32.3541	32.0847	32.3594	32.3961
2054.19	32.7478	31.5784	32.5106	33.07	32.1257	32.738	32.7316	32.8583	31.8308	28.9757	31.018	31.2289	30.7563	31.1206	31.705	31.6478	31.7226	31.4135	31.6153	31.1592	32.1861	31.6499	30.3975		29.0693	30.9036	28.9591	29.4907	28.659	30.1993	26.8424	28.0578	28.4453	29.5199	30.6868	30.9854	31.3481	31.257	31.2697	30.8995	31.7444	31.6433	29.3333	31.5778	31.9681	32.1275	31.8683	32.1396	32.1764
2056.12	32.5465	31.3766	32.3065	32.8707	31.9347	32.5423	32.534	32.6601	31.6303	28.7799	30.8119	31.0183	30.5532	30.9137	31.5089	31.4377	31.5244	31.2173	31.4163	30.9596	31.9747	31.4446	30.1948		28.8677	30.6942	28.7577	29.2944	28.4597	29.9974	26.645	27.8571	28.2509	29.3217	30.4919	30.7808	31.1418	31.047	31.0677	30.6896	31.5345	31.4333	29.1204	31.3677	31.7632	31.9282	31.6675	31.939	31.9721
2058.05	32.3412	31.1664	32.0942	32.6688	31.7274	32.3448	32.3257	32.4557	31.428	28.5787	30.5923	30.8072	30.3398	30.7063	31.2961	31.2241	31.3176	31.0125	31.2134	30.762	31.7583	31.2333	29.9811		28.6595	30.4835	28.5473	29.0922	28.2529	29.7878	26.4388	27.6515	28.0483	29.1213	30.2901	30.5721	30.926	30.8343	30.8574	30.4784	31.3172	31.2165	28.8999	31.1494	31.5551	31.7211	31.4604	31.7221	31.7643
2059.98	32.1514	30.9718	31.9042	32.4867	31.543	32.1662	32.1409	32.2734	31.2435	28.3968	30.3919	30.6184	30.1456	30.5125	31.1029	31.0311	31.1312	30.8215	31.0301	30.5773	31.5608	31.036	29.7854		28.4696	30.2889	28.3537	28.8983	28.0604	29.5968	26.2511	27.4636	27.8617	28.9374	30.1053	30.373	30.729	30.6365	30.6584	30.2879	31.1138	31.0155	28.7044	30.9505	31.3636	31.5259	31.2745	31.529	31.5731
2061.9	31.9552	30.783	31.7115	32.2989	31.3613	31.9827	31.9548	32.092	31.0553	28.2144	30.1958	30.4187	29.9518	30.3181	30.9177	30.8337	30.9447	30.6377	30.8461	30.3852	31.3648	30.8379	29.5899		28.277	30.0908	28.162	28.7013	27.8696	29.4043	26.063	27.2731	27.6783	28.7512	29.9217	30.1731	30.5352	30.4357	30.4611	30.0946	30.91	30.8092	28.5143	30.7509	31.1704	31.3385	31.0905	31.3409	31.3826
2063.83	31.7549	30.5907	31.5073	32.1028	31.165	31.7948	31.7634	31.9026	30.8583	28.0286	30.0036	30.2189	29.7635	30.1298	30.7204	30.6336	30.7514	30.4513	30.6527	30.1923	31.1656	30.6392	29.3908		28.083	29.9015	27.9699	28.5122	27.6808	29.2085	25.8744	27.078	27.4957	28.5628	29.7369	29.9753	30.3394	30.236	30.2662	29.9014	30.7112	30.6028	28.3188	30.549	30.9741	31.1451	30.8971	31.1472	31.1895
2065.76	31.5483	30.379	31.2943	31.8955	30.9619	31.5916	31.5596	31.6972	30.6513	27.831	29.7981	30.0124	29.5612	29.9287	30.518	30.4229	30.5469	30.2439	30.4504	29.9919	30.955	30.43	29.184		27.8789	29.7029	27.7647	28.3084	27.4793	29.0037	25.6735	26.8761	27.2989	28.3616	29.534	29.7604	30.1267	30.0293	30.058	29.6974	30.5023	30.395	28.1116	30.3356	30.7644	30.9388	30.6869	30.9369	30.9821
2067.69	31.3814	30.2127	31.1358	31.7365	30.8048	31.4304	31.3986	31.536	30.4877	27.6733	29.623	29.8418	29.3884	29.7629	30.3559	30.2493	30.3849	30.0778	30.2887	29.8298	30.7794	30.2612	29.0161		27.7069	29.5268	27.5926	28.1279	27.3083	28.8367	25.5051	26.7124	27.1364	28.1994	29.3686	29.5846	29.9501	29.8614	29.8841	29.5224	30.3244	30.2267	27.9447	30.1621	30.5973	30.7662	30.5245	30.7671	30.8139
2069.62	31.2014	30.0442	30.9634	31.5676	30.6431	31.2621	31.2284	31.3636	30.3212	27.5057	29.4373	29.6646	29.2125	29.5891	30.1753	30.0639	30.2132	29.9076	30.1171	29.66	30.5957	30.0808	28.8351		27.5314	29.331	27.415	27.9441	27.134	28.6586	25.3308	26.5407	26.9619	28.0282	29.1962	29.4054	29.7712	29.6836	29.7067	29.3395	30.1378	30.0432	27.7591	29.9815	30.4227	30.5831	30.352	30.5908	30.6379
2071.55	31.0307	29.8835	30.7947	31.4134	30.4887	31.1073	31.0748	31.2063	30.1689	27.35	29.2689	29.4988	29.0492	29.4237	30.0127	29.8977	30.0525	29.7488	29.9586	29.5032	30.4273	29.913	28.6672		27.3688	29.1531	27.2535	27.7774	26.9705	28.4922	25.1697	26.3826	26.8046	27.872	29.0378	29.24	29.6036	29.5172	29.5425	29.1727	29.967	29.8726	27.5843	29.8113	30.2617	30.4235	30.1891	30.4261	30.4739
2073.48	30.8602	29.7089	30.6101	31.2396	30.3147	30.9432	30.9135	31.0406	29.9927	27.1895	29.0944	29.323	28.874	29.244	29.8394	29.7218	29.8808	29.5774	29.7917	29.3335	30.2491	29.7409	28.497		27.1975	28.9782	27.0848	27.6025	26.7994	28.3168	25.0005	26.2118	26.6416	27.7063	28.8731	29.0679	29.4301	29.3413	29.3688	28.994	29.7871	29.6931	27.405	29.6323	30.0853	30.2554	30.0133	30.251	30.3014
2075.41	30.7121	29.5586	30.4498	31.081	30.1681	30.7979	30.7629	30.8897	29.8372	27.0462	28.9344	29.1665	28.7205	29.0916	29.6838	29.5609	29.7322	29.4269	29.6441	29.1864	30.0861	29.5815	28.3399		27.0457	28.8207	26.931	27.4519	26.6506	28.1581	24.8492	26.0603	26.4934	27.5551	28.7259	28.9087	29.2768	29.1827	29.2094	28.8393	29.624	29.5306	27.2488	29.4754	29.925	30.095	29.8586	30.0955	30.1453
2077.33	30.5466	29.3893	30.2903	30.9255	30.0148	30.6409	30.6095	30.7337	29.681	26.8923	28.7669	29.0065	28.5627	28.931	29.5302	29.3943	29.5769	29.2709	29.4877	29.0312	29.9213	29.4132	28.1723		26.8849	28.6539	26.7693	27.2968	26.4956	27.9982	24.6925	25.9024	26.3372	27.3991	28.5719	28.7409	29.1131	29.0202	29.0425	28.6797	29.4546	29.3624	27.0897	29.2999	29.7626	29.9313	29.6997	29.9313	29.9845
2079.26	30.3941	29.24	30.1444	30.7895	29.8718	30.5052	30.4734	30.6	29.5461	26.7556	28.621	28.8613	28.4187	28.7864	29.3875	29.2489	29.4372	29.1333	29.351	28.8909	29.7684	29.2639	28.0225		26.7389	28.5089	26.6222	27.1534	26.3515	27.8573	24.5528	25.7622	26.1991	27.264	28.4355	28.5927	28.9625	28.8743	28.8979	28.5302	29.304	29.2122	26.9406	29.1439	29.6244	29.79	29.559	29.7887	29.8423
2081.19	30.2404	29.0959	29.9857	30.6482	29.7231	30.3659	30.3202	30.458	29.4038	26.6141	28.4679	28.7053	28.2647	28.64	29.2346	29.0931	29.29	28.988	29.207	28.7466	29.6051	29.1155	27.8698		26.5903	28.3555	26.4756	27.0138	26.202	27.7063	24.407	25.6148	26.0553	27.1156	28.2926	28.4398	28.8095	28.7201	28.7461	28.3766	29.1498	29.0565	26.7829	28.987	29.4767	29.6368	29.4079	29.6366	29.69
2083.12	30.1063	28.9739	29.8502	30.5194	29.5987	30.2436	30.1867	30.332	29.2772	26.4927	28.3296	28.5667	28.1322	28.5039	29.1097	28.9541	29.1631	28.8603	29.0815	28.6245	29.4636	28.9833	27.7361		26.4632	28.214	26.343	26.8875	26.0742	27.5698	24.2813	25.4848	25.9319	26.9885	28.169	28.3032	28.6732	28.5834	28.6112	28.2402	29.0082	28.9177	26.6445	28.8522	29.3453	29.5023	29.2738	29.5015	29.5607
2085.05	29.9688	28.8357	29.7196	30.3789	29.465	30.1153	30.0517	30.1973	29.1477	26.3691	28.1899	28.4246	27.9983	28.3602	28.9728	28.8134	29.0325	28.7274	28.9505	28.4917	29.3216	28.8429	27.6001		26.3275	28.0775	26.2014	26.7462	25.9402	27.4335	24.1487	25.3517	25.806	26.8659	28.0381	28.1589	28.5306	28.4361	28.4751	28.1025	28.8609	28.7713	26.5046	28.7171	29.2074	29.367	29.1385	29.3681	29.4257
2086.98	29.8453	28.7126	29.5986	30.2607	29.3599	30.002	29.9402	30.0838	29.0331	26.26	28.0672	28.3029	27.8851	28.2482	28.8541	28.6919	28.9182	28.615	28.8372	28.3768	29.1942	28.7186	27.481		26.2044	27.9579	26.0849	26.6239	25.8234	27.3169	24.0296	25.2362	25.6919	26.7548	27.9268	28.035	28.4121	28.3115	28.3548	27.9839	28.7339	28.6432	26.3781	28.5904	29.0871	29.2551	29.0199	29.2511	29.3075
2088.91	29.7088	28.5815	29.4625	30.1323	29.2371	29.8733	29.816	29.9565	28.9028	26.132	27.9342	28.1708	27.7539	28.1219	28.7311	28.5529	28.79	28.4891	28.7108	28.2498	29.0558	28.5827	27.3504		26.0743	27.8233	25.9603	26.4929	25.6937	27.1839	23.9028	25.1065	25.565	26.6239	27.8001	27.9018	28.2814	28.1774	28.22	27.8546	28.5942	28.5052	26.2483	28.4454	28.9555	29.1223	28.8866	29.1156	29.1766
2090.84	29.6013	28.4691	29.3511	30.0273	29.1262	29.7674	29.704	29.8502	28.8043	26.024	27.8177	28.0569	27.6383	28.002	28.6154	28.4344	28.6811	28.3783	28.6032	28.1387	28.9379	28.4627	27.2349		25.9595	27.7022	25.8455	26.3753	25.5791	27.07	23.793	24.9955	25.4586	26.5115	27.6899	27.7839	28.159	28.0619	28.1039	27.7455	28.4706	28.3818	26.1379	28.3305	28.8431	28.9955	28.7754	28.9997	29.0618
2092.77	29.4945	28.3541	29.24	29.9214	29.023	29.6649	29.5877	29.7513	28.7011	25.9267	27.7009	27.9421	27.5228	27.8911	28.5043	28.3221	28.5738	28.2669	28.4977	28.0299	28.82	28.3466	27.1169		25.847	27.5841	25.73	26.2534	25.468	26.9576	23.6807	24.8909	25.3512	26.4098	27.5868	27.6588	28.0407	27.949	27.9885	27.6314	28.3532	28.2638	26.027	28.2144	28.7293	28.8784	28.6605	28.879	28.9498
2094.69	29.3917	28.2585	29.1354	29.8257	28.9403	29.5724	29.4894	29.6622	28.6051	25.8486	27.6016	27.8434	27.4272	27.7992	28.413	28.2234	28.4827	28.1762	28.4083	27.9433	28.7154	28.2435	27.0168		25.7538	27.4823	25.6321	26.1572	25.3737	26.8621	23.5808	24.7959	25.2571	26.3224	27.4969	27.5545	27.9445	27.8507	27.8878	27.5287	28.2513	28.1614	25.9271	28.1054	28.6282	28.7811	28.561	28.783	28.8528
2096.62	29.2856	28.1644	29.025	29.7253	28.8423	29.4744	29.3912	29.5608	28.4984	25.7529	27.4943	27.739	27.3272	27.7019	28.307	28.1127	28.3847	28.0809	28.3102	27.8473	28.6056	28.1384	26.9089		25.6547	27.3708	25.5314	26.0583	25.2715	26.7594	23.4787	24.6903	25.1611	26.2206	27.4017	27.4527	27.8402	27.7443	27.782	27.4197	28.1415	28.054	25.8188	28.0005	28.524	28.6789	28.4645	28.6828	28.75
2098.55	29.2002	28.0813	28.9378	29.6482	28.7649	29.398	29.3129	29.4801	28.4147	25.6684	27.4035	27.6499	27.2392	27.6173	28.2237	28.0197	28.3014	28.0006	28.2281	27.7642	28.5168	28.0519	26.8174		25.5666	27.2761	25.4462	25.9658	25.1856	26.6723	23.3956	24.6084	25.0818	26.1375	27.3225	27.3673	27.7442	27.6537	27.6956	27.3287	28.0487	27.9668	25.7174	27.9126	28.4376	28.5923	28.377	28.5972	28.6617
2100.48	29.1121	27.9929	28.8491	29.5665	28.684	29.3165	29.2281	29.3973	28.3376	25.5826	27.309	27.5631	27.1502	27.5135	28.1334	27.9223	28.2132	27.9164	28.1436	27.6796	28.4249	27.9577	26.7237		25.4738	27.1824	25.3517	25.8832	25.0965	26.5837	23.3097	24.5216	24.9959	26.0534	27.2393	27.2729	27.6511	27.563	27.6062	27.2405	27.9493	27.8709	25.6172	27.8135	28.3461	28.4986	28.2842	28.5104	28.5699
2102.41	29.0339	27.9201	28.7727	29.4938	28.6143	29.2519	29.1628	29.3314	28.2723	25.5212	27.2317	27.4887	27.0756	27.4347	28.0583	27.8479	28.1459	27.8473	28.081	27.6139	28.3436	27.8778	26.6488		25.4029	27.1086	25.2744	25.8189	25.022	26.5102	23.239	24.4464	24.9281	25.9805	27.1685	27.1897	27.5761	27.4872	27.5318	27.1688	27.8662	27.7895	25.5442	27.7389	28.2729	28.4181	28.2125	28.437	28.4976
2104.34	28.9506	27.8451	28.6866	29.4121	28.5462	29.182	29.0907	29.2571	28.1952	25.453	27.1541	27.407	26.9975	27.3662	27.989	27.7715	28.0721	27.7702	28.0079	27.5397	28.2588	27.7984	26.5689		25.3274	27.0337	25.1952	25.7302	24.9475	26.4311	23.1635	24.3739	24.8573	25.9041	27.0917	27.1054	27.4996	27.4056	27.4504	27.0872	27.7824	27.706	25.4655	27.6511	28.1953	28.3383	28.1318	28.3576	28.4233
2106.27	28.888	27.7862	28.6265	29.3518	28.4963	29.1292	29.0369	29.1981	28.1367	25.3975	27.0854	27.3432	26.9355	27.3056	27.9294	27.7054	28.0126	27.7128	27.9504	27.4841	28.191	27.7291	26.5064		25.2623	26.9681	25.1332	25.6563	24.8885	26.3654	23.1024	24.3167	24.8031	25.8492	27.0345	27.0387	27.4377	27.3431	27.3861	27.0202	27.7143	27.6368	25.4029	27.578	28.1312	28.2806	28.0698	28.2922	28.363
2108.2	28.8226	27.7245	28.5683	29.2955	28.4309	29.0698	28.9785	29.1357	28.0806	25.3391	27.0111	27.2754	26.871	27.2337	27.8597	27.6311	27.9471	27.6522	27.8858	27.4246	28.1189	27.6523	26.4361		25.1931	26.8943	25.0629	25.5859	24.8196	26.2945	23.0351	24.247	24.7441	25.7917	26.9755	26.9696	27.3686	27.2732	27.3192	26.9513	27.6403	27.562	25.3387	27.5074	28.0634	28.2114	28.0055	28.222	28.2943
2110.12	28.77	27.6812	28.5144	29.2589	28.3942	29.0274	28.9373	29.0963	28.0429	25.2979	26.9623	27.2255	26.8215	27.1873	27.8186	27.5825	27.9057	27.6086	27.8447	27.38	28.0616	27.6016	26.3805		25.1446	26.8391	25.0107	25.5331	24.7709	26.2467	22.9877	24.1997	24.7003	25.7472	26.9359	26.9191	27.317	27.2187	27.27	26.9019	27.5867	27.5073	25.2839	27.4558	28.0189	28.159	27.9607	28.1763	28.2454
2112.05	28.7139	27.6295	28.4543	29.2082	28.3466	28.9824	28.8923	29.0507	27.9928	25.2522	26.9084	27.1714	26.7684	27.136	27.7659	27.533	27.8599	27.5599	27.7999	27.3331	28.0021	27.55	26.3283		25.0917	26.7798	24.9605	25.4832	24.7203	26.1983	22.9369	24.1502	24.6529	25.6951	26.8868	26.8606	27.2607	27.1627	27.2148	26.8437	27.5304	27.45	25.2185	27.4032	27.9701	28.1055	27.9076	28.1221	28.1986
2113.98	28.6775	27.5887	28.4116	29.1691	28.3074	28.9492	28.8517	29.0148	27.9484	25.2225	26.8661	27.1321	26.729	27.0971	27.7285	27.4901	27.8257	27.5271	27.7676	27.3028	27.9593	27.5104	26.2938		25.0517	26.7376	24.9239	25.4533	24.6815	26.1597	22.9002	24.1136	24.6205	25.66	26.8521	26.8181	27.2202	27.1231	27.176	26.7996	27.4845	27.4064	25.1705	27.3615	27.9316	28.0725	27.8692	28.0833	28.1627
2115.91	28.6376	27.5467	28.367	29.1294	28.2753	28.9108	28.8079	28.9768	27.9119	25.1904	26.8193	27.0891	26.6801	27.0574	27.6956	27.4348	27.7882	27.4881	27.7284	27.2621	27.914	27.4657	26.251		25.0096	26.6922	24.8799	25.4047	24.6431	26.1102	22.8576	24.0732	24.5813	25.623	26.8146	26.777	27.1746	27.0822	27.1337	26.7562	27.4362	27.3606	25.1222	27.3129	27.8914	28.0318	27.8286	28.0427	28.1214
2117.84	28.6088	27.5269	28.3446	29.1072	28.267	28.8957	28.7879	28.9615	27.9049	25.1783	26.7888	27.0602	26.658	27.0379	27.673	27.4064	27.77	27.4688	27.7117	27.2432	27.8813	27.436	26.2216		24.989	26.6729	24.8544	25.376	24.6232	26.0842	22.8335	24.0506	24.5605	25.6062	26.7979	26.75	27.1474	27.0574	27.108	26.733	27.4073	27.3324	25.0957	27.2832	27.8699	28.0054	27.803	28.0199	28.1007
2119.77	28.5797	27.5031	28.322	29.0794	28.2495	28.8747	28.7632	28.9391	27.8856	25.1573	26.7561	27.0272	26.6371	27.0079	27.648	27.383	27.7454	27.4473	27.6906	27.2227	27.845	27.4018	26.1876		24.9606	26.6429	24.8252	25.3543	24.5953	26.0638	22.8059	24.0213	24.5343	25.5834	26.7745	26.7165	27.1183	27.0281	27.078	26.701	27.373	27.297	25.068	27.2473	27.8393	27.9743	27.7725	27.9931	28.0724
2121.7	28.5709	27.492	28.3087	29.0787	28.2464	28.8701	28.7574	28.9364	27.8798	25.1506	26.7428	27.0142	26.6286	26.9968	27.6426	27.3762	27.7388	27.4419	27.6843	27.2151	27.8292	27.3871	26.1709		24.9439	26.6216	24.812	25.3456	24.5843	26.0588	22.7906	24.0085	24.5242	25.5772	26.7662	26.7025	27.1038	27.0138	27.0659	26.687	27.3566	27.2803	25.0511	27.2293	27.8239	27.9588	27.7631	27.9827	28.0624
2123.63	28.5507	27.4729	28.2936	29.073	28.2319	28.8586	28.7489	28.9266	27.8714	25.1399	26.7229	26.999	26.6061	26.9781	27.6241	27.3564	27.7244	27.4275	27.672	27.2004	27.808	27.3696	26.1518		24.9271	26.6019	24.7972	25.3239	24.5687	26.0445	22.7751	23.9931	24.5141	25.5651	26.7537	26.6783	27.0848	26.9929	27.0469	26.6698	27.3398	27.2612	25.0288	27.2141	27.8107	27.9442	27.7479	27.9674	28.0506
2125.56	28.5505	27.4777	28.3036	29.0847	28.2408	28.8692	28.7525	28.9324	27.8832	25.1465	26.7192	27.0004	26.6032	26.975	27.6269	27.3513	27.7296	27.436	27.6796	27.2118	27.8028	27.3669	26.151		24.9302	26.6066	24.7981	25.317	24.5682	26.0446	22.7795	23.9952	24.5232	25.5696	26.7569	26.6747	27.0827	26.9901	27.0477	26.6703	27.3375	27.2589	25.028	27.2165	27.8154	27.9439	27.749	27.9693	28.0561
2127.48	28.5514	27.4798	28.2993	29.085	28.2498	28.8767	28.7508	28.9329	27.8806	25.1512	26.7132	27.0005	26.6035	26.9761	27.6293	27.3417	27.7327	27.4377	27.6799	27.2155	27.7986	27.3593	26.1446		24.9283	26.5977	24.7923	25.3164	24.566	26.0357	22.776	23.9925	24.5259	25.5728	26.7531	26.6723	27.0767	26.9848	27.0462	26.6688	27.3265	27.2503	25.0191	27.2119	27.8093	27.9403	27.7495	27.965	28.0543
2129.41	28.5701	27.4955	28.3183	29.0985	28.2746	28.8976	28.7716	28.9544	27.8972	25.1742	26.7247	27.0154	26.6182	26.9926	27.6397	27.3553	27.7534	27.4542	27.6988	27.2311	27.8128	27.3736	26.1573		24.9433	26.6017	24.8036	25.3281	24.5804	26.0464	22.7877	24.0093	24.5425	25.5931	26.7708	26.678	27.0911	26.9956	27.0584	26.6861	27.3345	27.2576	25.0267	27.2254	27.8221	27.9585	27.7688	27.9853	28.0693
2131.34	28.5859	27.5068	28.3324	29.114	28.2931	28.9143	28.7875	28.9744	27.9152	25.1902	26.7318	27.0234	26.6253	26.996	27.6577	27.3674	27.7685	27.4712	27.7166	27.2477	27.8208	27.3854	26.1709		24.9545	26.6069	24.8103	25.3387	24.5894	26.0623	22.7961	24.0222	24.556	25.6063	26.7879	26.6828	27.1015	27.0056	27.069	26.6971	27.3406	27.266	25.0335	27.2343	27.8388	27.9725	27.7796	28.0028	28.0825
2133.27	28.6101	27.5423	28.3622	29.1435	28.3285	28.9543	28.8202	29.0076	27.949	25.2217	26.755	27.0536	26.6562	27.0216	27.695	27.3977	27.803	27.5067	27.7526	27.2827	27.8472	27.4132	26.198		24.9783	26.629	24.835	25.3694	24.6158	26.0985	22.8215	24.048	24.5913	25.6364	26.8186	26.7146	27.127	27.0359	27.0976	26.7184	27.3631	27.2889	25.0529	27.2559	27.8708	28.0033	27.8077	28.0273	28.1133
2135.2	28.6249	27.5641	28.3853	29.1692	28.3592	28.9828	28.8536	29.0283	27.9824	25.2474	26.7738	27.0803	26.6815	27.0461	27.7124	27.4163	27.8316	27.5307	27.7783	27.3065	27.868	27.4306	26.2153		24.9964	26.6436	24.8554	25.3898	24.639	26.1206	22.8436	24.0666	24.6157	25.6625	26.8437	26.7339	27.1504	27.055	27.1183	26.7397	27.382	27.3059	25.0742	27.2715	27.8953	28.0244	27.8309	28.0491	28.1381
2137.13	28.6646	27.598	28.4185	29.2132	28.41	29.0248	28.8948	29.0718	28.0301	25.2926	26.8105	27.1125	26.7193	27.0844	27.7529	27.4481	27.8707	27.5697	27.8206	27.3507	27.9054	27.4589	26.2467		25.0315	26.6762	24.8915	25.4282	24.6775	26.1514	22.8817	24.1015	24.6536	25.7012	26.8885	26.7637	27.1869	27.0884	27.156	26.7757	27.4151	27.3386	25.1165	27.3033	27.9344	28.0607	27.8674	28.095	28.1785
2139.06	28.7007	27.636	28.4509	29.2519	28.4548	29.0657	28.9269	29.1181	28.0699	25.3378	26.8458	27.1414	26.7505	27.1208	27.7921	27.484	27.9053	27.6088	27.8612	27.3899	27.9386	27.49	26.275		25.0678	26.7119	24.9256	25.4688	24.7095	26.1813	22.9139	24.1362	24.6926	25.7331	26.9277	26.7965	27.2178	27.1251	27.1915	26.806	27.4444	27.367	25.1506	27.3401	27.9727	28.0951	27.8991	28.1331	28.2142
2140.99	28.7478	27.6954	28.5049	29.3097	28.5064	29.1257	28.9815	29.1769	28.1222	25.3926	26.8931	27.1946	26.8009	27.1725	27.8446	27.5394	27.9605	27.6638	27.9175	27.4438	27.9861	27.5426	26.3218		25.119	26.7659	24.9728	25.5097	24.7606	26.2322	22.963	24.1889	24.7455	25.7871	26.9821	26.8442	27.2668	27.1736	27.2412	26.8538	27.4919	27.4138	25.1907	27.3907	28.0208	28.1483	27.9523	28.1855	28.2691
2142.91	28.7958	27.7439	28.561	29.3616	28.5559	29.183	29.0279	29.2355	28.1703	25.4418	26.9371	27.2436	26.8504	27.2199	27.9036	27.5852	28.0138	27.7146	27.9717	27.4989	28.034	27.5896	26.3707		25.1647	26.8147	25.0166	25.5481	24.8088	26.2881	23.0092	24.2326	24.7935	25.8432	27.0313	26.8905	27.3167	27.2198	27.2898	26.903	27.5368	27.4616	25.2327	27.4338	28.0709	28.2014	28.0042	28.2418	28.323
2144.84	28.8691	27.8048	28.6264	29.4264	28.6307	29.2535	29.0956	29.3092	28.2409	25.5097	27.0008	27.301	26.913	27.2865	27.9707	27.6435	28.0851	27.7847	28.0413	27.5675	28.0943	27.6522	26.4347		25.2252	26.8699	25.0772	25.6193	24.8718	26.3545	23.0693	24.2953	24.857	25.9093	27.0982	26.9489	27.3819	27.2827	27.3539	26.9657	27.5983	27.5213	25.2911	27.4955	28.1412	28.2693	28.0713	28.3091	28.3891
2146.77	28.9393	27.8687	28.6849	29.4979	28.7029	29.3157	29.1723	29.3722	28.3107	25.5748	27.0593	27.3589	26.9711	27.3477	28.0307	27.697	28.1527	27.8499	28.1064	27.6294	28.1492	27.7105	26.4975		25.2793	26.9312	25.1372	25.6785	24.9291	26.4137	23.1267	24.3568	24.9211	25.9702	27.1608	27.0032	27.439	27.3412	27.4114	27.0243	27.6559	27.5786	25.3475	27.5575	28.2044	28.3311	28.1313	28.3692	28.4497
2148.7	29.0152	27.9494	28.7671	29.5881	28.7905	29.397	29.2632	29.4528	28.396	25.6575	27.1305	27.4356	27.0485	27.4179	28.1133	27.7727	28.2313	27.9273	28.1885	27.7108	28.2225	27.7835	26.5716		25.3553	27.013	25.2132	25.7425	25.004	26.4875	23.2002	24.4305	25.0001	26.0491	27.2397	27.08	27.5123	27.4197	27.4858	27.0962	27.7287	27.6538	25.4245	27.6327	28.2804	28.413	28.2079	28.4433	28.5292
2150.63	29.0829	28.0216	28.8421	29.6678	28.8658	29.48	29.3401	29.5339	28.476	25.7366	27.202	27.5086	27.1187	27.4883	28.1828	27.848	28.3073	28.0034	28.2657	27.7886	28.292	27.8514	26.639		25.4311	27.0771	25.2836	25.8164	25.0768	26.5592	23.2675	24.5016	25.0744	26.1236	27.3154	27.1514	27.5828	27.4907	27.5568	27.1665	27.7985	27.7215	25.4947	27.7037	28.3541	28.4782	28.2781	28.5178	28.6078
2152.56	29.1767	28.1175	28.9335	29.7602	28.9624	29.5773	29.4362	29.6283	28.5681	25.826	27.2885	27.5934	27.2017	27.5784	28.2706	27.9375	28.3982	28.0937	28.3559	27.8768	28.3743	27.934	26.7239		25.5166	27.1546	25.3684	25.9078	25.163	26.648	23.3492	24.5864	25.1625	26.2075	27.4046	27.2302	27.6691	27.5704	27.6418	27.2528	27.8812	27.8039	25.5758	27.7873	28.4353	28.5659	28.3688	28.6076	28.6994
2154.49	29.267	28.2123	29.0214	29.8473	29.0585	29.6699	29.5306	29.7161	28.6543	25.9093	27.3651	27.6689	27.2871	27.6585	28.3597	28.0207	28.4844	28.1789	28.4436	27.9617	28.4578	28.0162	26.808		25.5999	27.2333	25.4483	25.9895	25.2435	26.7306	23.4283	24.6668	25.2469	26.29	27.4911	27.3043	27.7501	27.6454	27.7243	27.3328	27.9618	27.8837	25.6564	27.8644	28.5172	28.6549	28.4565	28.6953	28.7841
2156.42	29.3602	28.3088	29.1241	29.9556	29.1699	29.7763	29.6363	29.8224	28.7657	26.0125	27.4628	27.7664	27.3853	27.7526	28.4561	28.1147	28.5866	28.282	28.5497	28.0689	28.5549	28.1148	26.9093		25.6942	27.3328	25.5401	26.0823	25.3394	26.8264	23.5212	24.7643	25.3445	26.3964	27.5946	27.4004	27.8477	27.7423	27.8233	27.4293	28.0582	27.978	25.7531	27.9559	28.6242	28.7548	28.5532	28.7908	28.885
2158.35	29.4529	28.4	29.2185	30.0662	29.2662	29.8782	29.7405	29.9274	28.8736	26.1179	27.5593	27.8641	27.48	27.8492	28.5562	28.2074	28.6843	28.3843	28.6499	28.1677	28.65	28.2108	27.0043		25.7867	27.4282	25.6329	26.1726	25.4328	26.9204	23.6124	24.8613	25.4411	26.4949	27.6961	27.495	27.9409	27.8386	27.9211	27.5253	28.1521	28.0753	25.8404	28.0539	28.7275	28.8505	28.6492	28.887	28.9818
2160.27	29.5721	28.5104	29.3304	30.1862	29.3828	29.996	29.8554	30.0441	28.9882	26.2331	27.6689	27.9742	27.5891	27.9587	28.6734	28.3201	28.7989	28.4961	28.7636	28.2793	28.7631	28.3184	27.109		25.8976	27.5351	25.742	26.2767	25.5413	27.0287	23.7188	24.9668	25.5551	26.6009	27.808	27.6043	28.0479	27.9451	28.0306	27.6321	28.2577	28.1836	25.9391	28.1656	28.8412	28.9544	28.766	29.0055	29.0969
2162.2	29.6892	28.6263	29.4431	30.2959	29.4925	30.1107	29.9579	30.1568	29.0988	26.3354	27.7759	28.0813	27.6927	28.0682	28.7792	28.4292	28.9111	28.6025	28.8744	28.3895	28.873	28.4225	27.213		26.0043	27.6407	25.8469	26.3742	25.6465	27.1385	23.8214	25.0693	25.6665	26.7065	27.9166	27.7098	28.153	28.0529	28.137	27.738	28.3615	28.2876	26.045	28.2763	28.9465	29.0686	28.8795	29.1141	29.2094
2164.13	29.8124	28.7529	29.5688	30.4207	29.6208	30.2421	30.0783	30.2849	29.2218	26.4584	27.896	28.1984	27.815	28.1953	28.9054	28.5495	29.0381	28.7317	29.002	28.5132	28.9944	28.5408	27.332		26.1234	27.7601	25.9655	26.4953	25.7637	27.2604	23.9357	25.1893	25.7882	26.8332	28.0431	27.8299	28.271	28.1752	28.2554	27.8611	28.4825	28.4092	26.1746	28.3924	29.071	29.201	29.004	29.2448	29.3382
2166.06	29.9302	28.8653	29.6917	30.5418	29.7474	30.3661	30.207	30.4056	29.3401	26.585	28.0104	28.3086	27.9346	28.3139	29.0247	28.6602	29.1573	28.8523	29.1237	28.632	29.1135	28.6584	27.4445		26.2396	27.8741	26.079	26.6227	25.8777	27.3759	24.0462	25.3031	25.9016	26.953	28.165	27.9459	28.3905	28.2887	28.3708	27.9737	28.6022	28.5275	26.2866	28.5008	29.1904	29.3194	29.1259	29.367	29.4616
2167.99	30.0639	28.9982	29.8278	30.6804	29.8789	30.5012	30.347	30.5447	29.4747	26.7211	28.1392	28.4372	28.0666	28.4494	29.156	28.7903	29.2895	28.9815	29.2588	28.7703	29.2456	28.7913	27.5721		26.3656	28.0007	26.2045	26.7582	26.0064	27.505	24.1703	25.4285	26.0279	27.0765	28.3019	28.0717	28.5209	28.4145	28.4998	28.1056	28.7308	28.6534	26.4036	28.6343	29.3189	29.4476	29.2603	29.4962	29.5953
2169.92	30.1955	29.1346	29.9596	30.8181	30.0065	30.6361	30.4731	30.6821	29.6087	26.8436	28.2695	28.5634	28.1919	28.5786	29.2892	28.9245	29.4202	29.1111	29.3873	28.9015	29.3743	28.9233	27.7017		26.4862	28.125	26.3304	26.8905	26.131	27.6338	24.2923	25.5511	26.1544	27.2036	28.4312	28.1914	28.6452	28.5392	28.6266	28.2374	28.8536	28.7771	26.521	28.7636	29.4458	29.5775	29.3863	29.6275	29.7229
2171.85	30.3389	29.2748	30.1029	30.9669	30.1577	30.7855	30.6239	30.8319	29.7551	26.9818	28.414	28.7018	28.329	28.7137	29.4294	29.0698	29.5647	29.2525	29.531	29.0434	29.5168	29.066	27.8451		26.6274	28.2652	26.4658	27.0258	26.2701	27.7807	24.4304	25.6904	26.2955	27.3488	28.5705	28.3315	28.7868	28.6785	28.77	28.3724	28.9933	28.9163	26.6638	28.8981	29.5908	29.7264	29.5248	29.7685	29.8637
2173.78	30.4794	29.4132	30.2384	31.1089	30.3033	30.9292	30.7739	30.9739	29.8994	27.1271	28.5468	28.8419	28.4702	28.8519	29.5673	29.2042	29.7076	29.3917	29.6733	29.1851	29.6553	29.2022	27.9821		26.7686	28.4023	26.6016	27.1446	26.4088	27.9252	24.5642	25.8264	26.4337	27.4827	28.7089	28.4697	28.9282	28.8159	28.9094	28.5059	29.1302	29.0536	26.799	29.0297	29.7357	29.8723	29.663	29.914	30.0041
2175.7	30.6419	29.5662	30.3942	31.2606	30.4651	31.0918	30.9279	31.1308	30.0548	27.2854	28.6919	28.9949	28.6225	29.0068	29.7268	29.3452	29.8622	29.5518	29.8287	29.3398	29.8076	29.3512	28.1307		26.9177	28.5528	26.7542	27.2915	26.5574	28.0776	24.7113	25.9766	26.5876	27.6301	28.8645	28.6159	29.0822	28.9683	29.0602	28.661	29.2805	29.205	26.9436	29.1788	29.8917	30.0236	29.8157	30.0738	30.1627
2177.63	30.796	29.7177	30.5537	31.4182	30.6243	31.2468	31.0849	31.2853	30.2097	27.4325	28.8415	29.1444	28.7718	29.1499	29.8801	29.4907	30.0125	29.705	29.9806	29.4877	29.9551	29.4944	28.2794		27.0627	28.7001	26.9037	27.4555	26.7019	28.223	24.8578	26.1222	26.7364	27.7842	29.0159	28.7607	29.2296	29.113	29.2112	28.8112	29.4285	29.3532	27.0883	29.3313	30.0445	30.1719	29.9675	30.2189	30.3131
2179.56	30.9569	29.8835	30.7188	31.5906	30.7923	31.4103	31.2587	31.4544	30.3809	27.5921	29.0058	29.3037	28.933	29.3079	30.0398	29.6617	30.1758	29.8652	30.1435	29.6532	30.1127	29.648	28.4392		27.2239	28.8573	27.0587	27.6223	26.8612	28.3826	25.0136	26.2784	26.8946	27.9481	29.1794	28.9162	29.3865	29.2715	29.3708	28.9703	29.5876	29.5134	27.2483	29.4965	30.2053	30.3371	30.1303	30.3761	30.4762
2181.49	31.1131	30.0466	30.8733	31.7574	30.9546	31.571	31.4178	31.6189	30.5419	27.7499	29.1603	29.4622	29.0914	29.4671	30.1987	29.8245	30.3353	30.0239	30.3004	29.8125	30.2676	29.8024	28.5938		27.383	29.0143	27.2066	27.7713	27.0162	28.5348	25.1662	26.433	27.0499	28.1023	29.3395	29.0737	29.5398	29.4308	29.5227	29.134	29.7408	29.6693	27.409	29.6513	30.359	30.4937	30.2862	30.5365	30.6391
2183.42	31.2873	30.2172	31.0462	31.9376	31.1306	31.7469	31.5862	31.7923	30.7113	27.9204	29.3277	29.6326	29.2558	29.6348	30.3661	29.9878	30.5054	30.2006	30.4702	29.9798	30.4373	29.9723	28.7586		27.5446	29.1854	27.3716	27.9439	27.1808	28.6999	25.3275	26.5982	27.2166	28.2668	29.5077	29.241	29.7043	29.5983	29.6886	29.3071	29.9079	29.8342	27.5764	29.8166	30.5231	30.6631	30.4551	30.7124	30.811
2185.35	31.4574	30.3848	31.215	32.1076	31.2937	31.9154	31.7561	31.9632	30.8787	28.0882	29.4941	29.7952	29.4134	29.7998	30.5301	30.1443	30.6697	30.3668	30.6381	30.1461	30.6007	30.1362	28.9197		27.7013	29.3447	27.5371	28.1086	27.3429	28.8667	25.4832	26.7573	27.3818	28.435	29.671	29.4036	29.868	29.7573	29.8539	29.4645	30.0723	29.9976	27.7347	29.9795	30.6924	30.8268	30.6207	30.884	30.9786
2187.28	31.6371	30.5569	31.3873	32.2921	31.4745	32.0981	31.9384	32.149	31.0509	28.2643	29.6695	29.9693	29.5949	29.9793	30.711	30.3199	30.8477	30.5419	30.8213	30.3287	30.7776	30.3099	29.0983		27.8752	29.5209	27.7145	28.2843	27.5178	29.0437	25.6517	26.9294	27.5567	28.6146	29.8502	29.5807	30.0451	29.9355	30.0337	29.6352	30.2472	30.1718	27.9054	30.1493	30.8732	31.0012	30.7993	31.063	31.1585
2189.21	31.8094	30.7258	31.5623	32.474	31.6559	32.2833	32.1184	32.3303	31.221	28.4381	29.8418	30.1459	29.7752	30.1526	30.8808	30.4986	31.0257	30.7177	30.9998	30.5021	30.9528	30.4826	29.271		28.0482	29.7019	27.8851	28.4583	27.6922	29.2219	25.8196	27.1012	27.7289	28.7826	30.0285	29.7488	30.219	30.1113	30.2111	29.8093	30.4211	30.3432	28.0744	30.3164	31.0441	31.1766	30.9751	31.2282	31.3342
2191.13	32.0066	30.9144	31.7524	32.6719	31.8466	32.4802	32.3117	32.5218	31.4158	28.6256	30.0312	30.3304	29.9608	30.3409	31.0699	30.6823	31.2131	30.907	31.1856	30.6867	31.1359	30.6702	29.455		28.2327	29.8895	28.0676	28.6363	27.8766	29.4093	25.9985	27.2852	27.9154	28.9658	30.219	29.9322	30.4095	30.2913	30.3979	29.9936	30.6045	30.5297	28.2556	30.4994	31.2287	31.3649	31.1642	31.4117	31.5234
2193.06	32.1996	31.1023	31.9426	32.8617	32.0355	32.6685	32.498	32.708	31.608	28.8114	30.218	30.5087	30.1408	30.5284	31.2595	30.858	31.3942	31.0907	31.3677	30.8731	31.3179	30.8524	29.6377		28.4144	30.0729	28.2479	28.8146	28.0534	29.5885	26.1723	27.464	28.097	29.1517	30.4072	30.1137	30.5946	30.4703	30.5794	30.1739	30.785	30.7113	28.4355	30.6849	31.4113	31.5526	31.3506	31.6045	31.7084
2194.99	32.3972	31.2994	32.1329	33.0593	32.2367	32.8669	32.6968	32.9066	31.8071	29.0032	30.4112	30.7012	30.333	30.7204	31.4471	31.055	31.5874	31.2874	31.5637	31.0659	31.5105	31.0423	29.829		28.6079	30.2654	28.4379	29.0101	28.2418	29.7812	26.3578	27.6534	28.2875	29.3416	30.6058	30.2998	30.7913	30.6655	30.7697	30.3744	30.9787	30.905	28.6335	30.8841	31.6084	31.7464	31.5449	31.8024	31.903
2196.92	32.5934	31.488	32.3181	33.2541	32.4222	33.0598	32.8962	33.102	32.0017	29.19	30.5989	30.8866	30.5258	30.9114	31.6396	31.2467	31.7776	31.477	31.7515	31.2532	31.7035	31.2287	30.0185		28.7944	30.4484	28.6227	29.2041	28.4257	29.9698	26.5396	27.8411	28.4755	29.5243	30.7969	30.4866	30.9829	30.8542	30.956	30.5652	31.1665	31.0941	28.8218	31.0679	31.7998	31.9329	31.7338	31.9975	32.092
2198.85	32.7986	31.6888	32.5269	33.4538	32.622	33.261	33.1049	33.3075	32.2056	29.3885	30.799	31.0859	30.7312	31.1191	31.8453	31.4471	31.9765	31.6748	31.954	31.4566	31.9082	31.4294	30.2177		28.9885	30.6356	28.8245	29.4026	28.6212	30.1689	26.7307	28.0393	28.6724	29.7222	30.9995	30.6898	31.18	31.0542	31.1559	30.7611	31.3615	31.291	29.0147	31.2568	31.9995	32.1349	31.936	32.2009	32.2934
2200.78	32.9989	31.88	32.7265	33.6484	32.825	33.4607	33.3008	33.5078	32.4041	29.5849	31	31.2797	30.9258	31.3153	32.0364	31.6408	32.1688	31.8716	32.1559	31.6533	32.1054	31.6231	30.412		29.1824	30.8324	29.0174	29.594	28.8172	30.364	26.9201	28.2299	28.866	29.918	31.1972	30.8769	31.3738	31.2475	31.3522	30.9553	31.5556	31.4851	29.2069	31.4528	32.1943	32.3312	32.1313	32.4014	32.4899
2202.71	33.2083	32.0867	32.9265	33.8582	33.0396	33.6738	33.5061	33.7177	32.6138	29.7914	31.2072	31.4856	31.1266	31.5171	32.2451	31.8409	32.3733	32.077	32.3627	31.8581	32.3121	31.8235	30.6166		29.3893	31.0404	29.2156	29.805	29.022	30.5675	27.1182	28.433	29.0712	30.1175	31.4045	31.0788	31.5822	31.4493	31.5577	31.1627	31.7614	31.6919	29.4133	31.6648	32.4016	32.5345	32.3373	32.6167	32.6956
2204.64	33.4108	32.2933	33.1267	34.0721	33.2448	33.8775	33.7122	33.9251	32.8156	29.9949	31.4075	31.6833	31.3247	31.7159	32.4475	32.0407	32.5766	32.276	32.5624	32.0627	32.518	32.023	30.8168		29.5884	31.2411	29.4127	30.0152	29.2199	30.7697	27.3135	28.6323	29.27	30.3149	31.6086	31.2858	31.7835	31.6461	31.7585	31.3648	31.9621	31.8924	29.6098	31.8689	32.598	32.7344	32.5431	32.8221	32.8991
2206.57	33.6316	32.5104	33.3523	34.295	33.4579	34.0917	33.924	34.1421	33.0316	30.2057	31.6218	31.8909	31.5431	31.9261	32.6561	32.2534	32.7908	32.4908	32.779	32.2766	32.7303	32.2317	31.0259		29.7969	31.4526	29.6203	30.2278	29.4281	30.9841	27.5207	28.8415	29.48	30.5308	31.8237	31.4944	31.9969	31.8571	31.9701	31.578	32.1709	32.1033	29.8191	32.0767	32.8068	32.947	32.7554	33.0325	33.1138
2208.49	33.8492	32.7207	33.568	34.5101	33.6717	34.3046	34.1286	34.3529	33.2379	30.4103	31.8322	32.1008	31.7553	32.1375	32.8746	32.4626	32.9993	32.7053	32.9901	32.4866	32.9352	32.4392	31.2331		30.0018	31.6642	29.8271	30.4336	29.6344	31.1914	27.7234	29.0477	29.6856	30.7402	32.0342	31.7019	32.2039	32.0705	32.1801	31.7855	32.3799	32.312	30.029	32.2811	33.016	33.1579	32.961	33.2397	33.3248
2210.42	34.0696	32.9409	33.7878	34.7339	33.8909	34.5292	34.3512	34.5751	33.4481	30.6284	32.0516	32.321	31.9716	32.3587	33.0869	32.6821	33.2195	32.9257	33.2098	32.7076	33.1527	32.6595	31.4534		30.2164	31.8899	30.0426	30.6486	29.8495	31.4072	27.9351	29.2596	29.9006	30.9543	32.2545	31.9253	32.4203	32.2898	32.3985	32.0061	32.6011	32.5274	30.2526	32.5043	33.233	33.3745	33.1777	33.4599	33.5409
2212.35	34.2781	33.157	34.0021	34.9485	34.1004	34.7452	34.5711	34.79	33.669	30.8436	32.2671	32.5329	32.1831	32.571	33.2959	32.8931	33.4327	33.139	33.4234	32.9233	33.3666	32.872	31.6694		30.4297	32.1001	30.2516	30.857	30.059	31.6181	28.1444	29.467	30.1121	31.1656	32.4704	32.1342	32.6349	32.5017	32.6129	32.2227	32.8155	32.7397	30.463	32.7216	33.4487	33.5882	33.3883	33.6757	33.7519
2214.28	34.4996	33.3781	34.225	35.1774	34.3294	34.9695	34.7933	35.0147	33.9051	31.0677	32.4903	32.7505	32.4064	32.7975	33.5266	33.1169	33.6526	33.364	33.6457	33.1456	33.59	33.0911	31.8921		30.6558	32.3249	30.4735	31.077	30.2793	31.8404	28.3623	29.6901	30.3341	31.3886	32.6951	32.3484	32.8593	32.7253	32.8371	32.439	33.0362	32.9636	30.6772	32.9445	33.6725	33.8162	33.6078	33.8958	33.9759
2216.21	34.7205	33.5921	34.4373	35.4032	34.559	35.1839	35.0167	35.2383	34.1303	31.2864	32.7105	32.9681	32.6231	33.0219	33.741	33.3348	33.8711	33.5799	33.8645	33.3648	33.8049	33.3031	32.1062		30.8743	32.5478	30.6942	31.2905	30.4957	32.06	28.5754	29.9078	30.5532	31.5991	32.9152	32.5653	33.0774	32.9412	33.058	32.6566	33.2511	33.1818	30.8953	33.1539	33.8866	34.0317	33.8255	34.117	34.1975
2218.14	34.9536	33.8208	34.6601	35.6324	34.7886	35.4095	35.2455	35.4695	34.3605	31.512	32.9372	33.1984	32.8468	33.251	33.9678	33.5614	34.0963	33.8003	34.0904	33.5936	34.0255	33.5266	32.3306		31.0974	32.7726	30.9208	31.5157	30.7193	32.2937	28.7964	30.1274	30.7776	31.8182	33.1413	32.793	33.3024	33.1678	33.2865	32.8813	33.4776	33.4094	31.1218	33.3695	34.1097	34.2509	34.0526	34.3419	34.4243
2220.07	35.1803	34.049	34.889	35.8485	35.011	35.6358	35.4741	35.6952	34.5843	31.7332	33.1544	33.4263	33.0703	33.47	34.1968	33.7837	34.3158	34.0266	34.3141	33.8164	34.2473	33.7506	32.5496		31.3183	32.9922	31.139	31.7409	30.9409	32.5178	29.0161	30.3464	30.9988	32.0388	33.36	33.0214	33.5268	33.3918	33.5087	33.1049	33.7	33.6304	31.3435	33.5933	34.3346	34.472	34.2743	34.5646	34.6469
2222	35.4168	34.2811	35.1273	36.0841	35.2446	35.8714	35.7146	35.9289	34.8146	31.9652	33.3871	33.6605	33.3013	33.7023	34.427	34.0113	34.5495	34.265	34.5478	34.0508	34.478	33.9852	32.7735		31.5494	33.2253	31.3664	31.9765	31.1724	32.743	29.2445	30.5761	31.2312	32.2705	33.5913	33.2564	33.7599	33.624	33.7395	33.3447	33.9311	33.8624	31.5796	33.8345	34.5652	34.707	34.5034	34.798	34.8792
2223.92	35.6444	34.5056	35.3535	36.3194	35.4815	36.101	35.9502	36.1573	35.041	32.1926	33.6151	33.8899	33.5275	33.93	34.6573	34.2379	34.7818	34.4897	34.7764	34.281	34.7046	34.2135	33		31.7788	33.4533	31.5914	32.2145	31.3995	32.9688	29.4677	30.8014	31.4599	32.4946	33.8222	33.4777	33.9886	33.8536	33.9691	33.5796	34.1595	34.0922	31.809	34.0676	34.7916	34.9341	34.7264	35.0273	35.1057
2225.85	35.8806	34.7506	35.5916	36.557	35.7118	36.3407	36.1872	36.3944	35.2762	32.4298	33.8481	34.1275	33.7678	34.1613	34.895	34.4759	35.0185	34.7269	35.0132	34.5152	34.9447	34.4461	33.2427		32.0142	33.6893	31.8252	32.4561	31.6316	33.2046	29.6995	31.0342	31.6948	32.7262	34.0597	33.7092	34.2269	34.0901	34.2052	33.815	34.3978	34.3271	32.0451	34.2951	35.0295	35.1611	34.9576	35.2694	35.3424
2227.78	36.1125	34.9871	35.829	36.7888	35.9421	36.5753	36.4136	36.6276	35.5061	32.6611	34.0786	34.3587	34.0027	34.394	35.1217	34.7092	35.2457	34.963	35.2462	34.7485	35.1811	34.67	33.4785		32.2413	33.9234	32.053	32.6801	31.8596	33.4349	29.9279	31.2625	31.926	32.9596	34.2937	33.9414	34.4594	34.322	34.4385	34.0445	34.6304	34.5585	32.2734	34.5183	35.2615	35.3867	35.1907	35.5076	35.5754
2229.71	36.3548	35.2228	36.0788	37.0268	36.186	36.8186	36.6505	36.8667	35.7501	32.9009	34.3187	34.5979	34.2423	34.6309	35.3642	34.949	35.4811	35.2006	35.4864	34.9902	35.4234	34.9012	33.7159		32.4768	34.1587	32.2903	32.905	32.099	33.6725	30.1624	31.4988	32.1653	33.198	34.5347	34.1823	34.6987	34.5585	34.683	34.2824	34.8715	34.802	32.5075	34.7585	35.5025	35.6271	35.4301	35.7456	35.8162
2231.64	36.5916	35.4541	36.3182	37.2602	36.4266	37.0517	36.8825	37.1062	35.9857	33.1346	34.5547	34.8327	34.4721	34.8654	35.5979	35.1789	35.7167	35.4342	35.7206	35.2203	35.6603	35.1324	33.9476		32.71	34.3878	32.5203	33.1399	32.3323	33.9075	30.3904	31.7311	32.3955	33.4278	34.77	34.4137	34.9377	34.7899	34.9169	34.5077	35.1056	35.0354	32.738	35.0026	35.7363	35.8605	35.6588	35.9727	36.0528
2233.57	36.8302	35.6997	36.5617	37.5016	36.6719	37.2903	37.1229	37.3485	36.2298	33.3692	34.7966	35.0724	34.7157	35.1077	35.8324	35.416	35.9598	35.6758	35.9626	35.4612	35.9053	35.376	34.1863		32.952	34.6278	32.7605	33.3937	32.5721	34.1502	30.6266	31.9734	32.6324	33.6649	35.01	34.6484	35.1857	35.0292	35.1579	34.746	35.3462	35.2768	32.9761	35.2489	35.9729	36.1009	35.8946	36.2082	36.2953
2235.5	37.0707	35.9423	36.7939	37.7463	36.9071	37.5275	37.3584	37.5841	36.4762	33.6057	35.0329	35.3098	34.953	35.3422	36.0762	35.6507	36.1963	35.9096	36.1976	35.6999	36.1444	35.6121	34.4187		33.188	34.8615	32.9984	33.6368	32.81	34.3853	30.8629	32.2088	32.8718	33.9028	35.2468	34.8829	35.4211	35.2606	35.3968	34.991	35.5824	35.5128	33.2142	35.479	36.2102	36.3381	36.1327	36.449	36.5312
2237.43	37.3227	36.1842	37.035	37.997	37.1497	37.7765	37.5994	37.8288	36.7176	33.8544	35.2742	35.5581	35.1963	35.5947	36.3263	35.8969	36.4427	36.153	36.4415	35.9434	36.3915	35.854	34.6567		33.4304	35.1095	33.243	33.8791	33.0555	34.6332	31.1078	32.4502	33.1201	34.1475	35.4947	35.1296	35.66	35.5048	35.6403	35.2397	35.8261	35.7543	33.457	35.7235	36.4558	36.5809	36.3773	36.7006	36.7741
2239.36	37.5582	36.4232	37.2701	38.2397	37.3975	38.0198	37.8441	38.0677	36.949	34.0981	35.5122	35.8021	35.4354	35.8411	36.5645	36.1429	36.6839	36.3971	36.6832	36.1831	36.6351	36.0904	34.8952		33.6676	35.3658	33.4828	34.1204	33.2947	34.8785	31.3487	32.69	33.36	34.3865	35.7353	35.3722	35.9036	35.7487	35.8795	35.4755	36.0685	35.9922	33.6973	35.9646	36.6963	36.8223	36.6097	36.9437	37.0132
2241.28	37.8029	36.6713	37.5262	38.4877	37.6512	38.2671	38.0941	38.3161	37.1951	34.3436	35.7631	36.0516	35.6859	36.0867	36.8165	36.3893	36.9297	36.6461	36.9303	36.432	36.8832	36.3358	35.145		33.9127	35.6135	33.7294	34.373	33.5397	35.127	31.5956	32.9335	33.6079	34.6312	35.9835	35.616	36.1583	35.9991	36.1305	35.7222	36.3187	36.242	33.948	36.2081	36.9458	37.0746	36.853	37.1903	37.2613
2243.21	38.0473	36.9171	37.781	38.7259	37.8977	38.5109	38.345	38.5615	37.4448	34.5838	36.0106	36.2971	35.9286	36.3307	37.0622	36.6283	37.1708	36.8881	37.1744	36.6753	37.1279	36.5746	35.3877		34.157	35.8409	33.9731	34.6172	33.7839	35.3753	31.836	33.1745	33.8501	34.8769	36.2276	35.8536	36.4073	36.2438	36.3758	35.9624	36.5642	36.4859	34.1976	36.4508	37.1912	37.3158	37.0987	37.4341	37.5079
2245.14	38.3054	37.1637	38.026	38.9769	38.1473	38.7618	38.6029	38.8089	37.6953	34.8335	36.2607	36.5527	36.1746	36.5807	37.313	36.8755	37.4233	37.1413	37.4199	36.9241	37.3802	36.8222	35.6327		34.4097	36.0839	34.2252	34.8741	34.036	35.6322	32.0826	33.423	34.1018	35.1275	36.4769	36.1051	36.6618	36.4941	36.6275	36.2074	36.8166	36.7356	34.4464	36.7057	37.446	37.5615	37.3462	37.6877	37.7622
2247.07	38.5597	37.4193	38.2731	39.2289	38.3992	39.0076	38.8496	39.054	37.9343	35.0799	36.5082	36.798	36.424	36.8289	37.5638	37.1189	37.672	37.3893	37.6626	37.1702	37.6248	37.0684	35.872		34.657	36.3423	34.4699	35.1247	34.2828	35.8782	32.3299	33.665	34.3504	35.3696	36.7222	36.3486	36.9075	36.7321	36.8755	36.4545	37.065	36.9809	34.681	36.9507	37.6903	37.8048	37.5894	37.9443	38.005
2249	38.8154	37.6766	38.54	39.4821	38.6539	39.2577	39.101	39.3049	38.1857	35.3291	36.7666	37.0447	36.6771	37.0854	37.8137	37.3739	37.926	37.6399	37.9151	37.4219	37.8774	37.3235	36.1237		34.9083	36.607	34.7207	35.3708	34.5339	36.1293	32.5815	33.9145	34.6032	35.6189	36.974	36.5944	37.1588	36.9764	37.1309	36.7117	37.3157	37.2323	34.9249	37.2006	37.9373	38.0612	37.839	38.1986	38.2516
2250.93	39.062	37.9194	38.7929	39.723	38.8976	39.5076	39.3486	39.5473	38.4364	35.5752	37.0148	37.2927	36.9181	37.33	38.0662	37.6157	38.1738	37.8847	38.1594	37.6662	38.1254	37.5677	36.3667		35.1511	36.8491	34.9725	35.6153	34.7799	36.3765	32.8291	34.1627	34.8552	35.8651	37.2238	36.8359	37.4059	37.2206	37.3813	36.9612	37.5616	37.4811	35.1797	37.4502	38.1849	38.3064	38.0801	38.4371	38.5015
2252.86	39.3181	38.1684	39.0468	39.9723	39.1423	39.7678	39.607	39.7986	38.6884	35.8245	37.2713	37.5457	37.1723	37.5794	38.3331	37.855	38.4301	38.1397	38.4092	37.918	38.379	37.8152	36.614		35.4039	37.0928	35.2246	35.864	35.0352	36.6261	33.0832	34.4122	35.108	36.1154	37.4812	37.0807	37.6643	37.4689	37.6376	37.2109	37.815	37.7318	35.4414	37.7081	38.4425	38.5581	38.3268	38.6943	38.7595
2254.79	39.5677	38.4237	39.2953	40.2191	39.3921	40.0193	39.8583	40.0456	38.9328	36.0723	37.5232	37.7952	37.4315	37.83	38.5802	38.0981	38.682	38.3892	38.6553	38.1643	38.6289	38.0606	36.8593		35.6553	37.3404	35.4706	36.1158	35.2905	36.872	33.3303	34.6573	35.3558	36.3626	37.7317	37.3261	37.9178	37.7171	37.8877	37.456	38.0651	37.9746	35.6838	37.9577	38.6949	38.8151	38.5716	38.9521	39.0105
2256.71	39.8195	38.6852	39.5578	40.4758	39.6469	40.2754	40.1105	40.2957	39.1939	36.3312	37.7803	38.0507	37.6884	38.0906	38.8412	38.355	38.9385	38.6425	38.9051	38.4146	38.886	38.3158	37.1074		35.9138	37.6008	35.7306	36.3866	35.5492	37.1324	33.5867	34.9089	35.6154	36.6202	37.9855	37.582	38.1731	37.9732	38.1418	37.7053	38.3215	38.2281	35.9303	38.2134	38.9475	39.0762	38.8243	39.2121	39.2663
2258.64	40.0707	38.9383	39.814	40.7305	39.8986	40.5298	40.3629	40.5417	39.4475	36.5817	38.0363	38.303	37.9353	38.339	39.1008	38.608	39.1918	38.8949	39.1526	38.6658	39.1408	38.5635	37.3471		36.1664	37.8513	35.9865	36.6489	35.8011	37.3861	33.8409	35.1559	35.8695	36.8695	38.2381	37.8273	38.4258	38.2182	38.3935	37.9487	38.5736	38.4779	36.1847	38.4575	39.2045	39.3336	39.0695	39.4648	39.5177
2260.57	40.3335	39.2022	40.0703	40.994	40.1514	40.792	40.6243	40.7941	39.6964	36.8316	38.2991	38.559	38.1949	38.5971	39.3558	38.8555	39.4501	39.1483	39.4081	38.921	39.4058	38.8199	37.5932		36.4209	38.1043	36.2431	36.9153	36.0581	37.6436	34.0984	35.4063	36.1294	37.1236	38.4994	38.0743	38.6826	38.467	38.6537	38.2051	38.8329	38.734	36.4448	38.7076	39.4717	39.5885	39.3243	39.7274	39.7768
2262.5	40.5903	39.4622	40.3203	41.2477	40.3994	41.0471	40.886	41.0418	39.9435	37.0782	38.5514	38.8154	38.4498	38.8551	39.6147	39.0887	39.7017	39.3951	39.6538	39.1674	39.66	39.0697	37.8314		36.672	38.3571	36.4939	37.173	36.3136	37.8993	34.3495	35.6526	36.3849	37.3746	38.7495	38.3183	38.9347	38.7118	38.9083	38.4637	39.0866	38.9872	36.6956	38.9515	39.7221	39.8438	39.5744	39.9827	40.0269
2264.43	40.8447	39.7145	40.5757	41.4971	40.6528	41.3026	41.1479	41.2937	40.1938	37.3353	38.8099	39.0731	38.7044	39.1131	39.8766	39.3363	39.9612	39.6546	39.9065	39.4213	39.9202	39.3215	38.0816		36.9275	38.6194	36.7518	37.4323	36.5737	38.1571	34.6063	35.9066	36.6446	37.6304	39.0082	38.572	39.1936	38.9642	39.1676	38.723	39.343	39.2423	36.9487	39.2064	39.9785	40.1073	39.8243	40.242	40.2803
2266.36	41.1004	39.9594	40.8327	41.7481	40.9075	41.5547	41.393	41.5442	40.4342	37.5871	39.0611	39.316	38.9567	39.3601	40.1232	39.5881	40.2161	39.9041	40.1532	39.6707	40.1772	39.5688	38.3318		37.178	38.8639	37.0032	37.6808	36.8248	38.4085	34.8589	36.1563	36.8993	37.8796	39.2652	38.8167	39.4457	39.2083	39.4193	38.9704	39.5928	39.4907	37.1994	39.4486	40.234	40.3586	40.0703	40.4979	40.5336
2268.29	41.3626	40.2162	41.0946	42.0044	41.1662	41.8109	41.6473	41.8003	40.683	37.8413	39.3169	39.5706	39.2125	39.6144	40.388	39.8436	40.4719	40.152	40.4053	39.9213	40.4332	39.8255	38.5837		37.4342	39.1123	37.256	37.9299	37.0781	38.6645	35.1157	36.4135	37.1543	38.1328	39.5209	39.0674	39.6981	39.4558	39.6754	39.2234	39.8486	39.7463	37.4621	39.6963	40.4859	40.6132	40.3231	40.7572	40.7908
2270.22	41.6131	40.4633	41.3528	42.2581	41.4188	42.064	41.8967	42.0507	40.9418	38.0915	39.5675	39.8236	39.4607	39.8674	40.6365	40.0928	40.7233	40.4051	40.6544	40.1688	40.6862	40.0738	38.8305		37.6834	39.362	37.507	38.1769	37.3306	38.9139	35.3648	36.666	37.4057	38.3829	39.7706	39.3174	39.9477	39.7024	39.9239	39.4655	40.0958	39.9931	37.716	39.9507	40.7356	40.8629	40.5712	41.009	41.041
2272.15	41.869	40.7154	41.6139	42.5194	41.673	42.3175	42.1455	42.3042	41.2084	38.3435	39.8255	40.076	39.7159	40.1285	40.887	40.3416	40.9796	40.6643	40.9079	40.4249	40.9463	40.3271	39.0873		37.94	39.6198	37.765	38.4414	37.5901	39.17	35.6176	36.9208	37.6651	38.6359	40.0256	39.5646	40.2045	39.9562	40.1756	39.7133	40.3492	40.2461	37.9731	40.2097	40.9936	41.1176	40.8227	41.2609	41.2984
2274.07	42.1166	40.9753	41.8651	42.7661	41.9248	42.5602	42.3976	42.5546	41.4633	38.5968	40.0802	40.3268	39.9687	40.3752	41.1433	40.5948	41.2288	40.9129	41.1605	40.6758	41.1973	40.5745	39.3404		38.1943	39.872	38.0159	38.6985	37.8449	39.4206	35.8702	37.1704	37.9165	38.8864	40.2726	39.8089	40.4528	40.2035	40.4279	39.9645	40.6025	40.4974	38.2245	40.4675	41.2453	41.3671	41.0713	41.5048	41.5531
2276	42.378	41.2418	42.1245	43.0199	42.1826	42.808	42.6561	42.811	41.7259	38.8628	40.3336	40.58	40.2256	40.619	41.3921	40.8608	41.4828	41.1691	41.4167	40.9305	41.4528	40.8267	39.5953		38.4537	40.1293	38.2728	38.9493	38.0991	39.6826	36.1298	37.4315	38.1717	39.1411	40.5252	40.0671	40.7061	40.4563	40.6874	40.2249	40.86	40.7516	38.4784	40.7301	41.4983	41.6191	41.3288	41.7666	41.8139
2277.93	42.6296	41.4891	42.3751	43.2721	42.4426	43.0561	42.9113	43.0664	41.9846	39.1211	40.5825	40.8278	40.4726	40.8659	41.6309	41.1193	41.7284	41.423	41.6675	41.1856	41.7005	41.075	39.8503		38.7058	40.3883	38.5255	39.2014	38.3455	39.9365	36.3808	37.6901	38.4189	39.3898	40.7742	40.3213	40.9547	40.7092	40.9363	40.474	41.1102	41.0039	38.7375	40.9757	41.7367	41.8604	41.5778	42.0216	42.0666
2279.86	42.883	41.741	42.6273	43.5323	42.7002	43.3118	43.1631	43.3276	42.2463	39.3802	40.8373	41.083	40.7259	41.1217	41.8869	41.3873	41.9789	41.6786	41.9277	41.4434	41.9538	41.3289	40.1204		38.9667	40.6431	38.7808	39.4606	38.6013	40.1909	36.6336	37.9517	38.6718	39.6472	41.0291	40.5798	41.2041	40.9704	41.1888	40.7331	41.3676	41.2624	39.0029	41.2385	41.9879	42.1161	41.8333	42.2722	42.3257
2281.79	43.139	42.0044	42.8755	43.7956	42.9652	43.5681	43.4175	43.5897	42.4973	39.6409	41.0908	41.3346	40.9805	41.3736	42.1388	41.6511	42.2353	41.9363	42.1902	41.7007	42.208	41.5861	40.3866		39.2274	40.8945	39.0352	39.7152	38.8602	40.4498	36.89	38.2101	38.9292	39.9082	41.2856	40.8398	41.46	41.2271	41.4416	40.9919	41.6271	41.5148	39.264	41.5049	42.2464	42.3725	42.0904	42.5317	42.5818
2283.72	43.4094	42.277	43.1461	44.0653	43.2325	43.8437	43.6878	43.8544	42.7528	39.9057	41.3595	41.6044	41.2432	41.6385	42.4109	41.9054	42.5081	42.2083	42.4501	41.9637	42.4741	41.852	40.6443		39.4973	41.1628	39.3012	39.9816	39.1318	40.7232	37.1586	38.467	39.1999	40.1728	41.5553	41.1003	41.7292	41.4848	41.7086	41.2549	41.8925	41.7748	39.5203	41.7685	42.5154	42.6458	42.3529	42.8008	42.8451
2285.65	43.6681	42.5384	43.4153	44.3297	43.4791	44.1191	43.9544	44.1019	42.9974	40.1556	41.6335	41.869	41.5104	41.905	42.6901	42.1373	42.7842	42.4655	42.6936	42.212	42.7381	42.1121	40.8739		39.7547	41.4213	39.5707	40.2496	39.4033	40.9867	37.4225	38.7105	39.4752	40.4288	41.8272	41.3417	41.9937	41.7249	41.9734	41.5032	42.1476	42.0241	39.7737	42.0103	42.7821	42.9171	42.6088	43.0689	43.1018
2287.58	43.9355	42.8099	43.6801	44.5889	43.7276	44.406	44.2361	44.3525	43.2329	40.4016	41.9137	42.139	41.7857	42.1785	42.9674	42.3662	43.0674	42.7243	42.933	42.4576	43.0095	42.3765	41.0978		40.0103	41.6836	39.848	40.535	39.6777	41.2495	37.6918	38.9533	39.7552	40.6936	42.1141	41.5779	42.264	41.9633	42.2466	41.7533	42.4056	42.2715	40.0319	42.2489	43.0588	43.1985	42.8648	43.3371	43.3584
2289.5	44.2038	43.0751	43.9498	44.8437	43.9747	44.6966	44.5224	44.6025	43.4658	40.6467	42.1909	42.4099	42.058	42.4465	43.2527	42.5902	43.3474	42.9863	43.1659	42.7014	43.2735	42.6318	41.3215		40.2678	41.945	40.1188	40.8293	39.9485	41.5101	37.957	39.1873	40.031	40.9563	42.3984	41.8078	42.5339	42.1983	42.5216	42.0057	42.6619	42.5138	40.2874	42.4806	43.331	43.4897	43.1156	43.601	43.6133
2291.43	44.468	43.3477	44.2356	45.115	44.227	44.9899	44.8088	44.858	43.7122	40.8957	42.4763	42.681	42.3361	42.7198	43.5477	42.8132	43.6373	43.2512	43.4052	42.9494	43.5467	42.8935	41.5491		40.5305	42.2183	40.3974	41.1295	40.2312	41.7786	38.2276	39.4226	40.3144	41.223	42.6857	42.0505	42.8112	42.4352	42.8057	42.2631	42.9272	42.761	40.5501	42.7198	43.6157	43.786	43.372	43.8803	43.8737
2293.36	44.7271	43.6204	44.5089	45.3821	44.464	45.2817	45.0902	45.1044	43.9658	41.1333	42.7621	42.9497	42.6084	42.993	43.8278	43.0237	43.9229	43.5055	43.6371	43.1867	43.8183	43.1564	41.7638		40.7873	42.487	40.673	41.4218	40.5106	42.0404	38.4996	39.6544	40.5923	41.4867	42.9735	42.2896	43.0815	42.6587	43.088	42.5106	43.1871	43.0087	40.8057	42.9595	43.8973	44.0764	43.6193	44.1513	44.1337
2295.29	44.9932	43.8908	44.7729	45.6545	44.7081	45.5746	45.3823	45.352	44.2142	41.3772	43.0472	43.2283	42.8884	43.2705	44.1264	43.2414	44.2087	43.7649	43.874	43.4333	44.0922	43.4235	41.9795		41.0474	42.7508	40.9526	41.7083	40.7866	42.3016	38.774	39.8841	40.876	41.7584	43.2673	42.5327	43.3624	42.8851	43.3736	42.7654	43.4501	43.2578	41.0601	43.2015	44.176	44.3701	43.872	44.4238	44.3998
2297.22	45.2585	44.1559	45.0371	45.9204	44.957	45.8644	45.675	45.5961	44.4437	41.6186	43.3293	43.4988	43.1669	43.538	44.4222	43.4549	44.4923	44.021	44.1058	43.675	44.3641	43.684	42.1928		41.3009	43.0053	41.2253	41.997	41.059	42.5542	39.0416	40.1099	41.1604	42.0266	43.5529	42.7705	43.6402	43.1061	43.6481	43.0115	43.7061	43.4948	41.3053	43.4377	44.4525	44.6577	44.1206	44.693	44.6548
2299.15	45.5253	44.4299	45.3215	46.1829	45.201	46.1628	45.9647	45.842	44.6794	41.8594	43.6221	43.7745	43.4468	43.8016	44.7054	43.6724	44.7817	44.2767	44.3335	43.9119	44.6399	43.9516	42.4075		41.5577	43.2652	41.5048	42.3012	41.3426	42.8188	39.3102	40.3398	41.448	42.293	43.8382	43.0027	43.916	43.3258	43.9297	43.2535	43.9671	43.733	41.5547	43.6742	44.7309	44.9585	44.3706	44.9632	44.9111
2301.08	45.7778	44.689	45.5961	46.439	45.4301	46.4567	46.2444	46.0821	44.9081	42.0938	43.9085	44.0462	43.7226	44.0654	45.0024	43.8796	45.0658	44.5273	44.5589	44.1471	44.9076	44.2154	42.6108		41.8097	43.5304	41.7807	42.5959	41.6236	43.0863	39.5782	40.5608	41.7309	42.5547	44.1276	43.2231	44.1888	43.5441	44.214	43.5013	44.2245	43.9674	41.8097	43.8957	45.0099	45.2563	44.6163	45.2308	45.165
2303.01	46.0494	44.9634	45.8748	46.7134	45.6731	46.7709	46.5572	46.3332	45.1374	42.3348	44.2076	44.3326	44.0187	44.3615	45.3098	44.0847	45.3684	44.7961	44.8	44.4	45.1967	44.4891	42.8266		42.077	43.8045	42.0681	42.9006	41.9155	43.3638	39.8615	40.788	42.0315	42.8369	44.4349	43.4588	44.4812	43.7805	44.515	43.7629	44.4944	44.2128	42.0765	44.1256	45.3104	45.5655	44.8768	45.5147	45.4328
2304.94	46.3207	45.2532	46.1494	46.9871	45.9057	47.105	46.8938	46.5709	45.3547	42.5604	44.52	44.6234	44.3167	44.6551	45.6282	44.2639	45.6822	45.0576	45.0159	44.6321	45.4911	44.7641	43.0097		42.336	44.0737	42.3685	43.2345	42.2152	43.6348	40.1441	40.9917	42.3447	43.1163	44.7608	43.6832	44.7724	43.9915	44.8244	44.003	44.7626	44.4498	42.3433	44.3438	45.6171	45.8929	45.1263	45.8145	45.6943
2306.86	46.6122	45.5496	46.4548	47.2612	46.1284	47.4509	47.2348	46.8051	45.557	42.778	44.8444	44.9232	44.6233	44.9507	45.9773	44.4208	46.0051	45.3157	45.2084	44.847	45.7864	45.0511	43.1607		42.5859	44.3445	42.6797	43.5816	42.5222	43.9053	40.4292	41.1828	42.6672	43.3963	45.0965	43.9011	45.0745	44.1871	45.1401	44.242	45.0338	44.6907	42.6015	44.547	45.9316	46.2409	45.3678	46.1163	45.9538
2308.79	46.8934	45.8352	46.7561	47.5255	46.3352	47.7803	47.5626	47.0307	45.7572	42.9894	45.159	45.199	44.9281	45.2473	46.3057	44.569	46.3159	45.567	45.3879	45.0511	46.0729	45.3291	43.3029		42.8304	44.6073	42.9733	43.9024	42.8173	44.1714	40.7048	41.3621	42.9791	43.6723	45.4201	44.1103	45.3747	44.3718	45.4494	44.4815	45.2989	44.9248	42.8418	44.7423	46.2399	46.5793	45.6013	46.4064	46.2018
2310.72	47.1693	46.1053	47.04	47.7805	46.5366	48.0928	47.874	47.2517	45.975	43.2019	45.4662	45.4821	45.217	45.5344	46.6247	44.7265	46.6069	45.8063	45.5723	45.2557	46.3613	45.5952	43.4658		43.0789	44.869	43.2639	44.2183	43.1053	44.4298	40.9793	41.5493	43.2834	43.9426	45.7294	44.313	45.6632	44.5673	45.7526	44.7146	45.5633	45.1656	43.0718	44.9377	46.5364	46.9055	45.8358	46.6947	46.4497
2312.65	47.4447	46.3717	47.3237	48.0309	46.7589	48.3864	48.1644	47.4807	46.1987	43.4219	45.7581	45.7668	45.49	45.8232	46.9334	44.9072	46.8851	46.0412	45.7737	45.4787	46.6442	45.8603	43.6506		43.3269	45.1292	43.5446	44.5341	43.3885	44.6846	41.249	41.7567	43.5772	44.2006	46.0217	44.5264	45.9407	44.7745	46.0376	44.955	45.8241	45.4107	43.2903	45.1438	46.8177	47.213	46.0713	46.9803	46.6918
2314.58	47.7421	46.6714	47.6567	48.3122	47.0232	48.7215	48.4775	47.7407	46.4439	43.6647	46.0806	46.0678	45.8101	46.1492	47.2596	45.1142	47.2	46.3199	46.0143	45.7357	46.9595	46.1578	43.8536		43.6	45.4243	43.8572	44.8719	43.7012	44.9697	41.5451	41.9952	43.894	44.4918	46.3485	44.7765	46.2459	45.0096	46.3527	45.2305	46.1164	45.6814	43.5573	45.3765	47.1473	47.5493	46.3397	47.2859	46.9656
2316.51	48.0396	46.9663	48.0005	48.5932	47.2553	49.0905	48.8238	47.9781	46.6526	43.8845	46.4314	46.3781	46.1447	46.4728	47.617	45.2599	47.5359	46.5896	46.2134	45.9554	47.279	46.4567	43.9989		43.8647	45.7062	44.1861	45.2362	44.032	45.2507	41.8523	42.2026	44.2366	44.797	46.7083	44.9977	46.5657	45.2118	46.6946	45.4791	46.407	45.9391	43.8274	45.5795	47.4976	47.9106	46.6008	47.5996	47.241
2318.44	48.3369	47.2594	48.3374	48.8655	47.4355	49.4771	49.1962	48.1739	46.8115	44.0621	46.7935	46.6924	46.4734	46.8081	48.0087	45.34	47.8815	46.8267	46.3579	46.1329	47.6005	46.7483	44.0827		44.104	45.9814	44.5132	45.6134	44.3632	45.5169	42.1523	42.3477	44.5975	45.0832	47.0832	45.1723	46.8926	45.3706	47.0502	45.7061	46.6859	46.168	44.0666	45.74	47.8417	48.2897	46.8323	47.9339	47.4914
2320.37	48.6275	47.5347	48.6517	49.1057	47.5847	49.8398	49.5423	48.3516	46.9466	44.2097	47.1295	46.9775	46.7673	47.1304	48.3581	45.3703	48.1919	47.0392	46.4573	46.2726	47.9068	47.0119	44.1212		44.3119	46.2174	44.8201	45.969	44.6692	45.7477	42.4213	42.4465	44.9259	45.3355	47.4323	45.2982	47.1966	45.4862	47.3806	45.9112	46.9396	46.3759	44.2592	45.8588	48.1674	48.6637	47.01	48.2578	47.6986
2322.29	48.9258	47.7868	48.9541	49.3457	47.7589	50.1676	49.8493	48.5481	47.1091	44.3772	47.4509	47.2642	47.0543	47.4402	48.7124	45.4304	48.4878	47.2627	46.5893	46.4338	48.2128	47.2748	44.1962		44.5497	46.4776	45.1057	46.318	44.9683	45.9842	42.6839	42.5857	45.2335	45.5835	47.7547	45.4464	47.4913	45.646	47.6827	46.1173	47.1921	46.6133	44.4644	46.0019	48.5053	49.0193	47.1937	48.5785	47.9173
2324.22	49.2313	48.0556	49.2573	49.6038	47.9669	50.4939	50.1624	48.7617	47.2992	44.5852	47.7801	47.5491	47.3662	47.7551	49.0645	45.5593	48.8047	47.5046	46.7727	46.6361	48.5126	47.5454	44.3269		44.8005	46.7583	45.3975	46.6843	45.2682	46.2593	42.9618	42.7809	45.5493	45.8663	48.0831	45.6533	47.7869	45.858	47.9857	46.3431	47.4575	46.8638	44.6974	46.2034	48.8225	49.3653	47.4305	48.8816	48.1704
2326.15	49.523	48.3696	49.6035	49.8747	48.2022	50.8469	50.5247	48.9847	47.5214	44.806	48.1375	47.8565	47.7029	48.0995	49.407	45.7252	49.1438	47.772	46.9619	46.86	48.85	47.8553	44.465		45.056	47.0223	45.735	47.0681	45.5983	46.5421	43.2697	42.9936	45.8955	46.1667	48.4294	45.8922	48.1012	46.0761	48.3291	46.6017	47.7604	47.143	44.9465	46.4292	49.1508	49.7312	47.7017	49.2003	48.439
2328.08	49.7822	48.6374	49.8986	50.1235	48.377	51.1656	50.8384	49.1729	47.6903	44.9882	48.447	48.1402	47.9914	48.3818	49.7422	45.8376	49.4303	47.9948	47.095	47.0285	49.1484	48.1207	44.5496		45.2662	47.2444	46.0245	47.3841	45.8941	46.7862	43.5444	43.1609	46.2108	46.4226	48.7511	46.0707	48.3797	46.22	48.6421	46.8174	48.023	47.3812	45.1448	46.5938	49.4619	50.0533	47.9104	49.4991	48.6612
2330.01	50.0557	48.8616	50.1576	50.3616	48.5506	51.4367	51.0915	49.3627	47.8514	45.1762	48.7308	48.4093	48.2443	48.6315	50.0342	45.9459	49.6796	48.1835	47.2448	47.1873	49.4148	48.3718	44.6571		45.4845	47.4932	46.2826	47.6622	46.1536	47.0154	43.7937	43.3272	46.479	46.655	49.0374	46.2247	48.6322	46.3728	48.9192	47.0258	48.2637	47.5966	45.3523	46.7158	49.7248	50.3389	48.1052	49.7837	48.8738
2331.94	50.3406	49.1081	50.4307	50.6108	48.7744	51.6869	51.3332	49.5797	48.078	45.4027	49.0044	48.6698	48.4935	48.9037	50.2896	46.1192	49.9426	48.4011	47.4455	47.4025	49.6768	48.6245	44.8398		45.7249	47.7678	46.5575	47.9334	46.3943	47.254	44.0493	43.538	46.7256	46.8941	49.3052	46.4216	48.8928	46.5939	49.1878	47.2716	48.5071	47.8393	45.6259	46.8827	49.9656	50.619	48.3214	50.0433	49.1065
2333.87	50.6451	49.4176	50.769	50.8844	49.0347	51.98	51.6213	49.8312	48.335	45.6572	49.2905	48.9627	48.7834	49.2098	50.6082	46.3509	50.2465	48.6807	47.6843	47.6548	49.9683	48.9019	45.0742		45.9937	48.0463	46.8483	48.2284	46.678	47.5203	44.331	43.7996	47.0153	47.1616	49.6	46.6802	49.1976	46.8566	49.471	47.5368	48.784	48.128	45.9	47.1459	50.2608	50.9325	48.5823	50.3278	49.3721
2335.8	50.9303	49.6766	51.071	51.101	49.2582	52.2677	51.9228	50.0454	48.5368	45.8677	49.5691	49.2279	49.0662	49.5049	50.891	46.5133	50.5224	48.9124	47.8754	47.8507	50.2373	49.1556	45.233		46.2221	48.2846	47.114	48.529	46.9454	47.763	44.5933	44.0027	47.3129	47.3973	49.8851	46.8924	49.4572	47.0559	49.7382	47.7651	49.0364	48.3723	46.085	47.3647	50.5422	51.2143	48.8008	50.5879	49.6007
2337.72	51.189	49.9303	51.3284	51.3061	49.4427	52.5432	52.2172	50.2601	48.736	46.0722	49.8515	49.4972	49.3358	49.7985	51.1835	46.669	50.7872	49.1374	48.0571	48.0561	50.5057	49.4037	45.4007		46.4496	48.5306	47.3736	48.8487	47.2126	48.0035	44.8501	44.1992	47.604	47.6599	50.1738	47.0874	49.712	47.236	50.0156	47.9935	49.2831	48.6084	46.2741	47.5524	50.8279	51.4981	49.0185	50.8681	49.8327
2339.65	51.3822	50.1611	51.5524	51.5261	49.5868	52.7878	52.4747	50.4494	48.9106	46.2617	50.0999	49.7467	49.5532	50.0278	51.4676	46.8077	51.0424	49.3558	48.2126	48.2357	50.7241	49.61	45.5391		46.6487	48.7546	47.5991	49.1133	47.4554	48.2128	45.0837	44.3628	47.8621	47.9008	50.4234	47.2628	49.966	47.4026	50.2635	48.1866	49.4855	48.8013	46.4542	47.699	51.0749	51.7737	49.2087	51.1117	50.0296
2341.58	51.54	50.3318	51.7162	51.7157	49.7724	52.9565	52.6586	50.622	49.0765	46.4355	50.296	49.9249	49.7473	50.2059	51.6443	46.9758	51.2452	49.5313	48.3511	48.3727	50.8821	49.7516	45.6787		46.819	48.9134	47.7971	49.2851	47.655	48.4002	45.28	44.5234	48.0527	48.0806	50.6071	47.422	50.1669	47.5648	50.452	48.3558	49.6501	48.9481	46.6265	47.8584	51.2505	51.9691	49.3637	51.2815	50.1889
2343.51	51.5642	50.3611	51.7171	51.7931	49.9206	52.9089	52.6567	50.746	49.2359	46.5839	50.3075	49.9743	49.7703	50.2261	51.6285	47.2327	51.2566	49.6008	48.5049	48.4939	50.8816	49.7437	45.9071		46.924	48.9658	47.8516	49.2519	47.6883	48.4872	45.3687	44.7048	48.0955	48.1323	50.6027	47.5635	50.207	47.7241	50.4813	48.4505	49.7071	49.0234	46.7458	48.0285	51.2343	51.901	49.4189	51.2834	50.2649
2345.44	51.6641	50.4707	51.7276	51.9955	50.2385	52.8889	52.6628	51.0467	49.601	46.9184	50.3154	50.0883	49.8118	50.2473	51.619	47.7907	51.3198	49.8423	48.9662	48.8873	50.928	49.8495	46.4903		47.1874	49.1234	47.9389	49.2638	47.7498	48.6789	45.5228	45.1116	48.1381	48.2563	50.5907	47.9022	50.2985	48.1033	50.5337	48.7155	49.8414	49.2398	47.059	48.4204	51.2113	51.8574	49.6329	51.3202	50.4869
2347.37	52.0339	50.921	52.0352	52.4663	50.8524	53.2515	52.9827	51.6079	50.2059	47.5175	50.6216	50.4669	50.1935	50.5776	51.8858	48.5278	51.6935	50.385	49.6869	49.5474	51.271	50.3357	47.3009		47.7093	49.5852	48.291	49.5525	48.1376	49.1426	45.9283	45.7587	48.4378	48.7028	50.9005	48.5376	50.6617	48.7292	50.8616	49.2448	50.2706	49.721	47.6206	49.0902	51.5476	52.1775	50.2427	51.6516	50.9867
2349.3	52.4821	51.4631	52.5171	52.9287	51.296	53.8194	53.5017	52.035	50.6131	47.9497	51.129	50.9267	50.7258	51.0878	52.378	48.874	52.1793	50.8471	50.1122	49.9898	51.7505	50.8835	47.7154		48.162	50.0629	48.7666	50.046	48.6462	49.5956	46.383	46.1668	48.914	49.202	51.416	49.0084	51.1396	49.1379	51.3481	49.6802	50.7587	50.167	48.0659	49.5404	52.0989	52.7335	50.7847	52.1441	51.4425
2351.23	52.8981	51.8492	53.0038	53.2341	51.387	54.3829	54.0093	52.1698	50.6801	48.0354	51.6572	51.3221	51.1939	51.5654	52.9671	48.7178	52.6213	51.074	50.1021	50.061	52.2058	51.2676	47.5713		48.3967	50.3719	49.2004	50.6177	49.0854	49.8885	46.7387	46.1764	49.4184	49.5491	51.955	49.094	51.5673	49.1755	51.8192	49.8694	51.1059	50.4213	48.2523	49.584	52.6288	53.3244	50.999	52.6294	51.6984
2353.16	53.3089	52.1705	53.4593	53.4664	51.3881	54.9209	54.4842	52.23	50.6639	48.0308	52.1649	51.6738	51.5835	51.9974	53.5329	48.4652	53.0152	51.2475	49.9778	50.0167	52.6536	51.5903	47.2788		48.569	50.6468	49.607	51.1976	49.4828	50.114	47.0645	46.1088	49.9054	49.8443	52.4697	49.0811	51.9554	49.1321	52.2589	49.9949	51.4064	50.6285	48.373	49.5426	53.1248	53.8689	51.1108	53.0997	51.8965
2355.08	53.6264	52.4555	53.8787	53.6637	51.3941	55.3814	54.9305	52.2967	50.6403	48.0205	52.5858	52.0126	51.9265	52.3976	54.0288	48.2263	53.3447	51.3898	49.8605	49.9711	53.041	51.856	46.9761		48.7043	50.8524	49.9599	51.7428	49.8344	50.3035	47.3634	46.0532	50.3313	50.0988	52.9206	49.0738	52.3075	49.1015	52.6488	50.1189	51.6684	50.8145	48.4319	49.4624	53.5631	54.3541	51.2008	53.5211	52.0691
2357.01	53.9328	52.7102	54.247	53.8651	51.4726	55.774	55.3086	52.3935	50.6761	48.0551	52.9306	52.3103	52.2468	52.7318	54.4651	48.0851	53.6203	51.5229	49.8152	49.9911	53.4051	52.1014	46.8427		48.8643	51.0591	50.2711	52.1852	50.1414	50.5127	47.648	46.0657	50.6965	50.3246	53.2752	49.1297	52.6183	49.1269	52.9741	50.2634	51.9279	51.0043	48.5484	49.4416	53.9348	54.7482	51.3054	53.8756	52.2528
2358.94	54.2513	52.8836	54.491	54.0511	51.599	56.0254	55.526	52.5208	50.792	48.1637	53.1668	52.505	52.4681	52.9737	54.7005	48.1057	53.7846	51.6785	49.8541	50.0658	53.6544	52.261	46.8611		49.0094	51.2259	50.4887	52.4548	50.3656	50.6718	47.8697	46.1712	50.9498	50.5128	53.5087	49.2437	52.8352	49.2119	53.198	50.406	52.1203	51.1662	48.7004	49.4825	54.1551	55.0025	51.4033	54.111	52.3944
2360.87	54.4986	53.0656	54.6673	54.2548	51.8116	56.1727	55.6707	52.7233	51.0047	48.3942	53.3451	52.7042	52.655	53.1788	54.8933	48.3221	53.9336	51.8932	50.0507	50.2529	53.8517	52.4118	47.033		49.1911	51.4351	50.6653	52.6491	50.569	50.8548	48.0628	46.3836	51.1311	50.7037	53.6804	49.4497	53.024	49.4174	53.3913	50.6245	52.3114	51.3522	48.9231	49.6741	54.3372	55.1771	51.5607	54.33	52.5861
2362.8	54.5778	53.2102	54.7496	54.3964	52.0278	56.2145	55.7693	52.9212	51.2011	48.6578	53.4431	52.8389	52.7557	53.2426	54.9693	48.603	54.0407	52.0247	50.3082	50.4937	53.9542	52.5126	47.3057		49.3789	51.6094	50.7943	52.7436	50.6889	51.0152	48.2196	46.6209	51.2417	50.8447	53.745	49.6653	53.1494	49.6648	53.5016	50.8026	52.456	51.5061	49.0983	49.933	54.432	55.2192	51.7291	54.4584	52.7703
2364.73	54.6355	53.3175	54.7812	54.5385	52.3112	56.2087	55.8143	53.1694	51.4834	48.9567	53.5164	52.9507	52.8349	53.2984	54.9151	49.0079	54.1198	52.2227	50.656	50.805	54.0134	52.5995	47.765		49.6184	51.779	50.8932	52.7338	50.7984	51.1948	48.3715	46.9591	51.316	50.9855	53.7813	49.9467	53.2438	49.9886	53.5736	51.0013	52.5985	51.6932	49.3411	50.268	54.4507	55.2169	51.9363	54.5113	52.9728
2366.66	54.7306	53.3982	54.7946	54.681	52.5959	56.1358	55.7724	53.4358	51.8386	49.2645	53.5099	53.0161	52.8733	53.3432	54.8683	49.5135	54.16	52.4352	51.0453	51.1319	54.0272	52.6794	48.2877		49.8196	51.9519	50.9421	52.644	50.8486	51.3822	48.4953	47.3443	51.3417	51.1116	53.7637	50.2438	53.2933	50.3397	53.592	51.2378	52.7037	51.8679	49.6035	50.6246	54.4099	55.1498	52.1309	54.5045	53.1425
2368.59	54.8104	53.4799	54.7819	54.8646	52.9135	56.0419	55.7347	53.7331	52.2116	49.6125	53.4792	53.0754	52.914	53.3482	54.7917	50.0886	54.1849	52.65	51.4853	51.5121	54.0414	52.7659	48.8658		50.0554	52.1185	50.9947	52.5604	50.8811	51.5836	48.6181	47.7539	51.3486	51.2295	53.7147	50.5738	53.3378	50.7165	53.5915	51.483	52.8249	52.0616	49.8727	51.0261	54.3861	55.0382	52.3712	54.4878	53.3382
2370.51	54.8171	53.5685	54.7607	55.0346	53.2646	55.9467	55.6855	54.0221	52.5831	49.9806	53.4369	53.1384	52.9346	53.3282	54.6714	50.651	54.1978	52.8658	51.929	51.8858	54.0388	52.8359	49.4457		50.2837	52.2296	51.0351	52.457	50.9114	51.7523	48.7289	48.162	51.3296	51.3307	53.6401	50.9141	53.361	51.0832	53.5875	51.7148	52.9393	52.2525	50.1096	51.4206	54.3346	54.897	52.6006	54.4703	53.5272
2372.44	54.8719	53.6815	54.7918	55.2009	53.6049	55.8711	55.6464	54.3158	52.9716	50.3582	53.4089	53.23	52.9661	53.3551	54.6074	51.2378	54.2255	53.0872	52.3736	52.2525	54.0667	52.9397	50.0277		50.5216	52.3747	51.1012	52.387	50.9665	51.9308	48.8511	48.5965	51.3254	51.4604	53.6098	51.2931	53.4061	51.4799	53.6064	51.9792	53.0749	52.4725	50.3862	51.8297	54.2924	54.7923	52.8376	54.4869	53.7268
2374.37	54.9598	53.7932	54.8279	55.3655	53.9189	55.8212	55.6422	54.6016	53.3522	50.7242	53.4074	53.3234	53.0178	53.3906	54.5449	51.804	54.2668	53.3029	52.7918	52.5985	54.1158	53.0627	50.5847		50.7624	52.5422	51.1783	52.3254	51.0359	52.1185	48.9848	49.0226	51.3445	51.604	53.6003	51.6462	53.4776	51.872	53.6306	52.2415	53.2201	52.6938	50.6783	52.2235	54.2767	54.7147	53.0866	54.515	53.9201
2376.3	55.0736	53.941	54.8989	55.5545	54.2519	55.824	55.6733	54.9012	53.7258	51.0812	53.4606	53.431	53.1122	53.458	54.5309	52.3362	54.344	53.5367	53.2004	52.9458	54.2113	53.2298	51.1256		51.0215	52.7383	51.2853	52.3061	51.1464	52.3318	49.1522	49.4465	51.4076	51.7674	53.6238	51.9914	53.5828	52.265	53.6909	52.5037	53.3992	52.9441	50.9634	52.6113	54.3209	54.6959	53.3566	54.595	54.143
2378.23	55.2105	54.107	55.0189	55.761	54.5879	55.8557	55.7139	55.1982	54.0689	51.431	53.5354	53.5603	53.2353	53.5621	54.5701	52.8227	54.4393	53.7837	53.5922	53.2832	54.3346	53.4143	51.6305		51.2769	52.9388	51.4111	52.3475	51.273	52.555	49.3303	49.858	51.4919	51.948	53.678	52.3517	53.7065	52.6485	53.7755	52.7791	53.5975	53.2152	51.2488	52.9917	54.4041	54.7156	53.635	54.7057	54.3799
2380.16	55.3968	54.3004	55.185	55.9921	54.9383	55.9257	55.7898	55.5078	54.4305	51.7886	53.6449	53.7252	53.3763	53.7032	54.6225	53.2957	54.5573	54.043	53.9785	53.6218	54.4976	53.6348	52.131		51.5534	53.1594	51.5714	52.4451	51.4255	52.7886	49.5321	50.2797	51.6039	52.1564	53.7711	52.7261	53.8534	53.0391	53.8919	53.0872	53.8295	53.5198	51.5459	53.3839	54.53	54.7801	53.9311	54.8498	54.6368
2382.09	55.6139	54.5136	55.3705	56.2338	55.2799	56.0268	55.9086	55.8184	54.7833	52.1416	53.7738	53.8998	53.5353	53.8686	54.7043	53.749	54.689	54.3012	54.3478	53.9521	54.6838	53.8672	52.6005		51.8326	53.3815	51.7454	52.5664	51.5929	53.0258	49.751	50.6935	51.739	52.3715	53.8957	53.0832	54.0161	53.4162	54.0259	53.3907	54.0676	53.8318	51.8389	53.7594	54.683	54.8695	54.2235	55.0267	54.8952
2384.02	55.8472	54.74	55.5806	56.4702	55.5926	56.1678	56.0547	56.1102	55.0971	52.47	53.9338	54.0897	53.726	54.0672	54.8418	54.1647	54.8473	54.5658	54.696	54.2714	54.8908	54.1078	53.0217		52.1108	53.6195	51.9386	52.712	51.7872	53.2706	49.9761	51.068	51.9047	52.5975	54.0463	53.4082	54.2125	53.7706	54.1926	53.6838	54.3096	54.1314	52.1276	54.0996	54.8658	54.9963	54.5145	55.2344	55.1517
2385.95	56.0816	54.9678	55.7953	56.6961	55.8717	56.3348	56.2209	56.3662	55.3745	52.7559	54.1194	54.2902	53.9214	54.2682	55.0001	54.5128	55.0207	54.8107	54.9984	54.5572	55.1033	54.337	53.3649		52.3679	53.8572	52.1409	52.8786	51.9954	53.5066	50.1983	51.3837	52.0915	52.8228	54.2187	53.6804	54.4134	54.0705	54.3756	53.9458	54.5414	54.4014	52.3907	54.3829	55.0553	55.1559	54.7772	55.4398	55.3949
2387.87	56.3122	55.1931	56.0161	56.919	56.1225	56.5282	56.4129	56.605	55.6365	53.0076	54.3301	54.5028	54.1308	54.4788	55.1948	54.8002	55.211	55.0431	55.2616	54.8107	55.3219	54.5631	53.6517		52.6061	54.0907	52.3517	53.0766	52.2162	53.7381	50.4253	51.6567	52.3017	53.0465	54.4156	53.93	54.6197	54.329	54.5792	54.1824	54.7721	54.6562	52.6367	54.6346	55.2613	55.3458	55.0136	55.6544	55.6301
2389.8	56.5256	55.4089	56.2379	57.133	56.3409	56.7345	56.6136	56.8292	55.8757	53.2393	54.5396	54.7092	54.3374	54.6956	55.4028	55.0383	55.4115	55.263	55.4955	55.0405	55.5332	54.7766	53.8959		52.8299	54.3034	52.5654	53.2937	52.4335	53.9606	50.6533	51.8995	52.5167	53.2631	54.619	54.1579	54.8292	54.556	54.787	54.4012	54.986	54.883	52.8673	54.8641	55.4727	55.547	55.2252	55.8639	55.8548
2391.73	56.7419	55.6262	56.4578	57.3534	56.5569	56.9471	56.8228	57.0453	56.0911	53.4704	54.7566	54.9212	54.5491	54.9162	55.6078	55.2604	55.6216	55.4798	55.7105	55.2619	55.7512	54.9923	54.123		53.0573	54.5216	52.7912	53.5163	52.6555	54.1828	50.8802	52.1288	52.7345	53.4835	54.8332	54.3775	55.0438	54.7773	55.0007	54.6225	55.2044	55.1057	53.0937	55.0884	55.681	55.7546	55.4412	56.0805	56.0735
2393.66	56.9568	55.8355	56.6703	57.5641	56.7775	57.1572	57.0364	57.2533	56.2943	53.6959	54.9678	55.1379	54.7581	55.126	55.8201	55.4812	55.8297	55.6928	55.9198	55.4784	55.9647	55.2056	54.3359		53.2767	54.7422	53.0126	53.7332	52.8757	54.4061	51.1024	52.3467	52.9546	53.7005	55.0455	54.5893	55.2562	54.9876	55.2118	54.8326	55.4199	55.3181	53.3113	55.3016	55.8903	55.9643	55.6534	56.2942	56.2853
2395.59	57.1732	56.0453	56.8887	57.7848	56.996	57.3702	57.247	57.4675	56.5174	53.9177	55.1868	55.3574	54.9796	55.3428	56.0418	55.6991	56.0375	55.9091	56.1369	55.6956	56.1842	55.4206	54.5524		53.4982	54.9627	53.2333	53.9505	53.1004	54.6359	51.3275	52.5679	53.1778	53.926	55.2604	54.8086	55.4745	55.2037	55.4266	55.0558	55.6377	55.5341	53.5388	55.5186	56.1108	56.1825	55.8688	56.5097	56.5088
2397.52	57.3793	56.2541	57.1011	57.9992	57.2052	57.5814	57.4568	57.6817	56.7404	54.1316	55.4069	55.5658	55.1991	55.5552	56.2474	55.9126	56.2426	56.1215	56.3457	55.906	56.4011	55.6258	54.7678		53.7182	55.1728	53.4509	54.164	53.3215	54.8509	51.5533	52.7879	53.3969	54.1422	55.4676	55.0219	55.6891	55.4181	55.6353	55.2815	55.853	55.7442	53.765	55.7288	56.323	56.3917	56.08	56.7189	56.728
2399.45	57.5973	56.4737	57.3206	58.2056	57.4092	57.792	57.6718	57.8945	56.9529	54.3485	55.6245	55.7788	55.42	55.7626	56.4613	56.1266	56.448	56.3319	56.5559	56.1209	56.6218	55.8376	54.9856		53.9399	55.3856	53.6684	54.3915	53.5442	55.0654	51.7834	53.0095	53.6189	54.3541	55.6771	55.2386	55.9047	55.6332	55.8475	55.4982	56.0717	55.9584	53.982	55.9395	56.5372	56.5985	56.2888	56.9296	56.9429
2401.38	57.8084	56.6872	57.5316	58.4088	57.6153	57.9956	57.876	58.0995	57.1568	54.5637	55.8325	55.9866	55.6313	55.9666	56.6667	56.3328	56.6514	56.5374	56.76	56.3302	56.833	56.0374	55.196		54.1561	55.5972	53.8772	54.606	53.7615	55.2754	52.0063	53.2275	53.8386	54.564	55.8893	55.4483	56.1116	55.8324	56.0529	55.7049	56.2838	56.1705	54.19	56.1419	56.7499	56.7984	56.4881	57.1372	57.1525
2403.3	58.0225	56.8917	57.7385	58.6184	57.8286	58.1961	58.0799	58.3041	57.3546	54.7814	56.0429	56.196	55.8391	56.1734	56.8703	56.5412	56.856	56.7486	56.9627	56.5394	57.0486	56.2391	55.4042		54.3721	55.8086	54.0891	54.8151	53.9754	55.4873	52.2247	53.4422	54.0553	54.7755	56.099	55.6565	56.322	56.0345	56.26	55.9175	56.4939	56.3805	54.3954	56.3441	56.9544	57.0031	56.6877	57.3504	57.3603
2405.23	58.234	57.0914	57.9411	58.8219	58.035	58.3992	58.2878	58.5036	57.5539	54.9913	56.2459	56.3969	56.0422	56.3721	57.0811	56.7453	57.0515	56.9504	57.1655	56.7459	57.2588	56.4368	55.6064		54.5817	56.0135	54.2988	55.0297	54.1836	55.7006	52.4373	53.6497	54.2636	54.9826	56.3046	55.8592	56.5244	56.2361	56.464	56.12	56.6946	56.5797	54.6042	56.5519	57.1451	57.2045	56.8856	57.56	57.5601
2407.16	58.4484	57.2998	58.1592	59.0241	58.2462	58.6074	58.4917	58.7076	57.7593	55.1967	56.4554	56.5974	56.2527	56.5839	57.2834	56.9538	57.2525	57.1482	57.3652	56.9513	57.4677	56.6378	55.8155		54.791	56.2243	54.514	55.2411	54.3971	55.9122	52.6557	53.8609	54.4749	55.1835	56.5095	56.0662	56.7292	56.4453	56.6707	56.329	56.9005	56.7844	54.8193	56.7616	57.3479	57.4093	57.0893	57.7636	57.7635
2409.09	58.6488	57.4975	58.3593	59.2346	58.4626	58.8124	58.6901	58.9142	57.9709	55.4062	56.6613	56.7992	56.4594	56.7902	57.472	57.1608	57.4533	57.3537	57.5617	57.1535	57.6731	56.8351	56.0213		55.0005	56.4241	54.7276	55.4436	54.6063	56.1152	52.8726	54.0711	54.6862	55.3869	56.7137	56.2664	56.9325	56.6483	56.8753	56.5374	57.1008	56.9888	55.0286	56.9553	57.5543	57.612	57.2893	57.9532	57.9625
2411.02	58.8477	57.7026	58.5611	59.4504	58.6715	59.0192	58.8977	59.1222	58.1814	55.6249	56.8689	57.0122	56.6704	56.9931	57.6823	57.3634	57.6553	57.5617	57.7685	57.3622	57.8827	57.0404	56.2314		55.2172	56.6346	54.9433	55.6587	54.8193	56.3233	53.09	54.287	54.9031	55.6016	56.9219	56.4734	57.1474	56.8592	57.084	56.7483	57.3085	57.1968	55.2471	57.1567	57.7648	57.8176	57.4954	58.1525	58.1651
2412.95	59.0542	57.9141	58.776	59.658	58.8682	59.223	59.1088	59.3225	58.3862	55.8377	57.0756	57.2184	56.8812	57.2058	57.8826	57.5644	57.8564	57.7638	57.9707	57.5727	58.0874	57.2455	56.4406		55.4305	56.8461	55.1543	55.8747	55.0354	56.534	53.3082	54.5013	55.1146	55.8055	57.127	56.6859	57.3574	57.0674	57.2853	56.9584	57.5162	57.3988	55.4602	57.3621	57.9714	58.0144	57.6995	58.3613	58.3689
2414.88	59.2652	58.1262	58.9874	59.8644	59.0746	59.4279	59.315	59.5253	58.5923	56.0491	57.2841	57.423	57.0917	57.4199	58.0921	57.7724	58.0601	57.9686	58.1766	57.7799	58.2948	57.4518	56.6504		55.6497	57.0601	55.3638	56.0868	55.2534	56.747	53.5274	54.7153	55.3252	56.0141	57.3342	56.8978	57.5636	57.271	57.4917	57.1635	57.726	57.6071	55.6715	57.5723	58.1712	58.2195	57.9011	58.5773	58.574
2416.81	59.4616	58.3295	59.1887	60.0689	59.2765	59.6282	59.5143	59.7261	58.7932	56.2552	57.4903	57.627	57.2912	57.62	58.2986	57.9749	58.26	58.1749	58.3771	57.979	58.4968	57.6514	56.854		55.8613	57.2594	55.5741	56.2992	55.4591	56.9549	53.741	54.9269	55.5356	56.2265	57.542	57.0994	57.7612	57.4713	57.6943	57.3641	57.928	57.8078	55.8771	57.778	58.3687	58.4271	58.1026	58.7816	58.7738
2418.74	59.6614	58.5354	59.3883	60.27	59.4832	59.8243	59.719	59.9276	58.9974	56.4635	57.6984	57.8285	57.4913	57.8192	58.4911	58.1799	58.4585	58.3783	58.5762	58.1821	58.698	57.8469	57.0593		56.0679	57.4582	55.785	56.5129	55.666	57.1613	53.9581	55.1381	55.74	56.433	57.7519	57.3033	57.9611	57.6748	57.8996	57.5762	58.1279	58.0093	56.0812	57.9777	58.5699	58.6233	58.3042	58.9738	58.979
2420.66	59.8643	58.7308	59.5906	60.4714	59.6841	60.0163	59.9228	60.1286	59.1969	56.6694	57.898	58.02	57.6959	58.0194	58.6917	58.3783	58.6526	58.5741	58.7705	58.3814	58.8934	58.0373	57.259		56.2711	57.6641	55.987	56.7148	55.8682	57.363	54.1699	55.3421	55.9434	56.6274	57.9497	57.4985	58.1623	57.8679	58.0956	57.7798	58.3223	58.2055	56.2857	58.1716	58.763	58.8133	58.4935	59.1646	59.1738
2422.59	60.063	58.9241	59.7916	60.6748	59.8705	60.211	60.1174	60.3269	59.3917	56.8714	58.0994	58.2218	57.8965	58.2197	58.8902	58.5692	58.8447	58.7728	58.9675	58.5796	59.0923	58.2319	57.4593		56.4751	57.8695	56.1937	56.9124	56.0696	57.566	54.3779	55.5468	56.1492	56.8271	58.147	57.6964	58.3615	58.0612	58.2948	57.9799	58.5201	58.4021	56.4983	58.3733	58.951	59.0085	58.685	59.3619	59.366
2424.52	60.2588	59.1177	59.979	60.8615	60.0602	60.4069	60.3063	60.516	59.5886	57.0722	58.2922	58.4221	58.0885	58.4167	59.0686	58.7574	59.033	58.9652	59.1593	58.7752	59.2845	58.4253	57.6524		56.6737	58.0686	56.3967	57.1118	56.2726	57.7617	54.5849	55.7519	56.3509	57.0274	58.3386	57.8953	58.5555	58.2524	58.4923	58.1831	58.7139	58.5941	56.7047	58.5649	59.1415	59.1959	58.8742	59.5464	59.5535
2426.45	60.4564	59.3148	60.1727	61.0527	60.2588	60.6037	60.4988	60.7131	59.7849	57.2782	58.4893	58.6276	58.2865	58.6137	59.265	58.956	59.2263	59.1598	59.3508	58.971	59.4816	58.6258	57.8519		56.8795	58.267	56.5973	57.3214	56.482	57.9639	54.7947	55.9598	56.5581	57.2222	58.5348	58.0985	58.758	58.4533	58.6902	58.3855	58.9134	58.7941	56.9027	58.7649	59.3379	59.3901	59.0645	59.7409	59.7472
2428.38	60.6476	59.5151	60.362	61.2452	60.4523	60.7997	60.6861	60.9081	59.9754	57.4814	58.6905	58.826	58.4848	58.8038	59.4598	59.1594	59.4184	59.3588	59.5467	59.1686	59.675	58.8162	58.0507		57.0837	58.4698	56.7955	57.5261	56.6825	58.166	55.0029	56.1653	56.7656	57.4157	58.7342	58.2961	58.954	58.6513	58.8845	58.5791	59.1073	58.9862	57.1051	58.9571	59.5295	59.5801	59.2538	59.9309	59.9406
2430.31	60.8497	59.712	60.5581	61.4468	60.6521	60.9959	60.8815	61.1043	60.1747	57.6843	58.8964	59.0271	58.6903	59.0082	59.6513	59.3587	59.6157	59.5563	59.7415	59.3661	59.8789	59.011	58.2514		57.288	58.6771	57.0046	57.7392	56.8895	58.3664	55.2133	56.3735	56.9735	57.6233	58.9335	58.4967	59.1543	58.8557	59.0864	58.7788	59.3053	59.1844	57.3114	59.1514	59.7187	59.7768	59.4498	60.1236	60.1338
2432.24	61.0439	59.9035	60.7541	61.6448	60.8528	61.1875	61.0798	61.301	60.374	57.8856	59.0981	59.2259	58.8882	59.2081	59.8532	59.5501	59.8107	59.7499	59.9363	59.5622	60.0754	59.2031	58.4506		57.4924	58.8614	57.2112	57.9359	57.0953	58.5684	55.4202	56.577	57.177	57.8286	59.1303	58.6963	59.355	59.0592	59.2839	58.9768	59.5014	59.381	57.5111	59.3464	59.907	59.9735	59.6469	60.3241	60.3226
2434.17	61.236	60.1071	60.9602	61.8377	61.0471	61.3775	61.2777	61.4963	60.5713	58.0908	59.299	59.4254	59.0896	59.4024	60.051	59.7452	60.0034	59.9506	60.1343	59.7613	60.2687	59.3993	58.6562		57.6989	59.0609	57.4109	58.1331	57.3	58.7708	55.6273	56.7766	57.3782	58.0258	59.3302	58.8967	59.5587	59.2594	59.4813	59.1748	59.7008	59.5794	57.7156	59.543	60.1048	60.1712	59.8349	60.5214	60.5131
2436.09	61.4263	60.3055	61.1548	62.0255	61.2413	61.5665	61.4713	61.6834	60.766	58.2925	59.4917	59.6211	59.2863	59.5984	60.238	59.9395	60.1893	60.1456	60.3244	59.9521	60.4583	59.5874	58.8518		57.8951	59.2593	57.6059	58.3376	57.4991	58.9655	55.8338	56.9779	57.575	58.2168	59.5249	59.0843	59.7553	59.4525	59.6729	59.3719	59.8903	59.7705	57.9228	59.7341	60.2947	60.3501	60.0183	60.7122	60.7005
2438.02	61.6228	60.4979	61.332	62.2128	61.4323	61.7563	61.6631	61.8727	60.9542	58.4904	59.6866	59.8188	59.476	59.7956	60.4327	60.1329	60.3751	60.3364	60.5137	60.1413	60.6513	59.7743	59.0393		58.0952	59.4555	57.8036	58.5414	57.6967	59.1634	56.0376	57.1811	57.7727	58.4146	59.7122	59.2758	59.9448	59.6461	59.8672	59.5682	60.0802	59.961	58.1298	59.9267	60.4832	60.53	60.2067	60.9034	60.8871
2439.95	61.8057	60.6846	61.5127	62.4011	61.6123	61.9398	61.844	62.0592	61.1358	58.6754	59.8748	60.0089	59.6626	59.9812	60.6071	60.3137	60.5601	60.5234	60.6965	60.324	60.8348	59.9565	59.2206		58.2914	59.6451	57.9977	58.7328	57.8863	59.3507	56.2353	57.3747	57.9703	58.6047	59.9002	59.4641	60.1336	59.8342	60.0587	59.7533	60.2641	60.1454	58.3235	60.1132	60.6664	60.7106	60.3797	61.0799	61.0706
2441.88	61.9863	60.8684	61.7072	62.5902	61.794	62.1204	62.0265	62.2458	61.3232	58.8617	60.0617	60.1947	59.8518	60.1691	60.789	60.4946	60.7434	60.7069	60.8813	60.5098	61.0219	60.1435	59.4125		58.4867	59.8336	58.1928	58.9239	58.0795	59.5421	56.4353	57.572	58.1646	58.7879	60.0897	59.658	60.3277	60.0259	60.2502	59.9429	60.4551	60.3373	58.5088	60.298	60.8524	60.8903	60.556	61.2634	61.2597
2443.81	62.1694	61.0481	61.8898	62.7764	61.9857	62.2976	62.2079	62.4309	61.4977	59.0582	60.2463	60.3801	60.0377	60.3585	60.9842	60.6826	60.9254	60.8895	61.0654	60.6999	61.2064	60.328	59.6028		58.6756	60.0235	58.3857	59.1143	58.2722	59.7378	56.631	57.7664	58.3554	58.9714	60.2757	59.8509	60.5149	60.2136	60.4365	60.1277	60.6449	60.5286	58.693	60.4845	61.0329	61.0684	60.7352	61.4473	61.4435
2445.74	62.3603	61.2378	62.0676	62.9587	62.182	62.4834	62.3842	62.6177	61.6879	59.2624	60.442	60.5714	60.2287	60.5488	61.1708	60.88	61.1167	61.0819	61.2538	60.893	61.3935	60.5165	59.7998		58.8724	60.2135	58.5806	59.314	58.4664	59.9331	56.8305	57.96	58.5541	59.1625	60.4639	60.043	60.71	60.4036	60.6306	60.323	60.8348	60.7228	58.8871	60.6854	61.2167	61.2545	60.9242	61.6374	61.6297
2447.67	62.5502	61.4353	62.2552	63.14	62.3707	62.6743	62.5739	62.8	61.8866	59.4606	60.6353	60.7643	60.4188	60.7342	61.3569	61.0824	61.3013	61.2736	61.4415	61.0864	61.579	60.7023	59.9928		59.0695	60.4056	58.7718	59.5165	58.6621	60.1259	57.0326	58.1583	58.7485	59.3502	60.6511	60.2274	60.9051	60.5947	60.8201	60.5137	61.0236	60.9086	59.0835	60.8779	61.4045	61.4402	61.1104	61.824	61.812
2449.6	62.7387	61.6299	62.4423	63.3312	62.5576	62.86	62.7647	62.9793	62.0755	59.6517	60.8268	60.961	60.6112	60.9222	61.5586	61.2759	61.4853	61.4653	61.6333	61.2811	61.7672	60.8922	60.1877		59.2666	60.6014	58.9715	59.7147	58.8584	60.3182	57.2357	58.3592	58.9409	59.5432	60.8425	60.4203	61.0995	60.7861	61.0127	60.706	61.2171	61.0977	59.282	61.066	61.5932	61.6285	61.2967	62.0118	62.0005
2451.53	62.9177	61.8098	62.6249	63.5181	62.7386	63.0419	62.944	63.1573	62.2588	59.8411	61.0137	61.1491	60.8035	61.1072	61.741	61.455	61.6689	61.6575	61.8229	61.4684	61.954	61.0732	60.3762		59.46	60.7893	59.1656	59.8967	59.053	60.5075	57.437	58.5549	59.1313	59.7394	61.0257	60.6105	61.2861	60.9735	61.2067	60.8995	61.4048	61.2872	59.4738	61.2478	61.7764	61.8133	61.4786	62.1977	62.183
2453.45	63.0943	61.9947	62.8137	63.7047	62.9275	63.2252	63.1221	63.343	62.4533	60.0313	61.2024	61.3408	60.9915	61.2994	61.9314	61.6358	61.8514	61.8466	62.0094	61.6538	62.1448	61.2562	60.5676		59.6549	60.9843	59.3576	60.0796	59.251	60.6952	57.6387	58.7525	59.3262	59.9324	61.2091	60.7996	61.4762	61.1609	61.3943	61.0881	61.5967	61.4799	59.6755	61.4364	61.9625	61.989	61.6578	62.3846	62.3656
2455.38	63.268	62.1866	62.9996	63.8755	63.107	63.4001	63.2999	63.5226	62.642	60.2196	61.3875	61.5286	61.1718	61.4828	62.1132	61.8204	62.0308	62.0236	62.1858	61.8296	62.3232	61.4351	60.7507		59.842	61.1704	59.5466	60.2663	59.4416	60.8774	57.8317	58.9411	59.5167	60.1117	61.3892	60.982	61.66	61.3416	61.5758	61.2663	61.7782	61.661	59.8686	61.6224	62.1451	62.167	61.8318	62.5627	62.5463
2457.31	63.4563	62.3638	63.1867	64.0445	63.2834	63.5724	63.4799	63.6967	62.8165	60.4065	61.5743	61.7093	61.3559	61.6582	62.287	62.0103	62.2095	62.2016	62.3622	62.0116	62.5025	61.613	60.9339		60.0331	61.3512	59.7388	60.4603	59.6244	61.0656	58.0267	59.1318	59.7042	60.2941	61.5719	61.1679	61.8434	61.5242	61.758	61.4507	61.9598	61.8449	60.0546	61.8086	62.3255	62.345	62.0078	62.7483	62.7231
2459.24	63.6362	62.5371	63.3592	64.2212	63.4595	63.747	63.6526	63.8655	62.984	60.5902	61.7488	61.8816	61.5298	61.8332	62.4681	62.1908	62.3839	62.3794	62.5398	62.1927	62.6787	61.7834	61.1172		60.2202	61.5189	59.9244	60.6451	59.8089	61.2485	58.2128	59.3164	59.889	60.4743	61.7526	61.3426	62.0218	61.7013	61.9391	61.6296	62.1392	62.0252	60.2387	61.986	62.4973	62.5141	62.1768	62.9238	62.8984
2461.17	63.81	62.7194	63.5322	64.3994	63.6376	63.9255	63.8328	64.0362	63.1593	60.7756	61.9286	62.0633	61.7098	62.0174	62.6478	62.3642	62.562	62.5584	62.7186	62.369	62.8623	61.9627	61.3008		60.4112	61.6983	60.107	60.8309	59.9976	61.4402	58.4009	59.5029	60.0802	60.6516	61.9321	61.5219	62.2033	61.8864	62.122	61.8071	62.3222	62.207	60.4269	62.1596	62.669	62.6915	62.3538	63.0958	63.0774
2463.1	63.9827	62.8995	63.7118	64.5731	63.8087	64.0959	64.0063	64.2106	63.3378	60.9598	62.1123	62.2424	61.8869	62.1961	62.8215	62.5427	62.7386	62.732	62.897	62.5453	63.0426	62.1398	61.4819		60.5953	61.8852	60.2912	61.0199	60.1813	61.6244	58.5923	59.6914	60.2666	60.8268	62.1081	61.7005	62.3803	62.0654	62.3001	61.9887	62.4999	62.3848	60.6109	62.3374	62.8468	62.8602	62.5345	63.2755	63.2552
2465.03	64.1647	63.0841	63.8959	64.7497	63.985	64.2706	64.1731	64.3887	63.5186	61.1483	62.3033	62.431	62.0706	62.3803	63.0124	62.725	62.9154	62.913	63.0788	62.7233	63.2295	62.3231	61.6668		60.7836	62.0684	60.4817	61.2154	60.3718	61.8089	58.7911	59.8846	60.4528	61.0151	62.2903	61.8827	62.5671	62.2455	62.487	62.1814	62.6855	62.5725	60.8031	62.5265	63.0345	63.0421	62.717	63.4608	63.4351
2466.96	64.3389	63.2669	64.0718	64.9212	64.1666	64.4471	64.3422	64.5603	63.6935	61.3359	62.4858	62.6133	62.2508	62.5618	63.1904	62.9042	63.0894	63.0949	63.2552	62.8987	63.4082	62.5036	61.8464		60.9719	62.2437	60.666	61.4004	60.5592	61.9936	58.9837	60.0726	60.637	61.2013	62.4714	62.0688	62.7529	62.4273	62.6682	62.3634	62.8688	62.758	60.9919	62.7093	63.2111	63.2194	62.8863	63.6428	63.6115
2468.88	64.5168	63.4506	64.2459	65.096	64.3528	64.6249	64.5219	64.7364	63.8721	61.5191	62.6674	62.7966	62.4349	62.7449	63.359	63.09	63.268	63.2721	63.4314	63.0731	63.5921	62.6812	62.034		61.1637	62.4292	60.8556	61.5811	60.744	62.1777	59.1763	60.2619	60.8253	61.3848	62.651	62.2542	62.9377	62.6127	62.8498	62.5459	63.0561	62.9412	61.1804	62.8968	63.389	63.3928	63.0636	63.8254	63.792
2470.81	64.6885	63.6265	64.4181	65.2689	64.5243	64.7953	64.6991	64.91	64.0541	61.699	62.8451	62.9776	62.6174	62.9247	63.5417	63.2662	63.4404	63.4476	63.6027	63.2428	63.771	62.8514	62.2178		61.3431	62.6056	61.0405	61.7601	60.9248	62.3578	59.3708	60.449	61.0125	61.5646	62.8264	62.4277	63.1128	62.7904	63.0257	62.7261	63.2349	63.1166	61.3634	63.0766	63.5661	63.5639	63.2394	64.0006	63.965
2472.74	64.8613	63.8111	64.5933	65.4361	64.6936	64.9629	64.8624	65.0787	64.2275	61.8797	63.0285	63.1559	62.7983	63.099	63.7206	63.4348	63.6136	63.6251	63.7767	63.4152	63.9483	63.0279	62.3998		61.5209	62.7785	61.2224	61.9408	61.1121	62.5372	59.5611	60.6359	61.1988	61.7473	63.001	62.6018	63.2894	62.9712	63.2057	62.9012	63.413	63.2981	61.5437	63.2551	63.7455	63.7349	63.4076	64.1783	64.1408
2474.67	65.031	63.9864	64.7596	65.6023	64.8699	65.1257	65.0184	65.2433	64.3995	62.0562	63.2049	63.3235	62.9713	63.2623	63.8844	63.6027	63.7844	63.7934	63.9449	63.5841	64.121	63.1962	62.5741		61.7002	62.9428	61.3983	62.1212	61.292	62.708	59.7411	60.8153	61.375	61.9207	63.1689	62.7688	63.462	63.1457	63.381	63.0711	63.5843	63.4714	61.72	63.4325	63.918	63.9009	63.5694	64.3532	64.3144
2476.6	65.2043	64.154	64.9365	65.7645	65.0458	65.2941	65.1851	65.4111	64.5695	62.2343	63.3806	63.4953	63.1395	63.4326	64.0607	63.7797	63.9509	63.9582	64.1139	63.7525	64.2967	63.3653	62.7477		61.8806	63.1208	61.5798	62.2987	61.4733	62.8843	59.9224	60.9897	61.555	62.0893	63.3353	62.9423	63.6378	63.3172	63.5539	63.2496	63.7588	63.6444	61.8992	63.6087	64.0902	64.0781	63.7423	64.5375	64.4897
2478.53	65.3733	64.3158	65.1117	65.9236	65.2023	65.4589	65.356	65.5737	64.7286	62.4056	63.5536	63.6639	63.3086	63.605	64.2253	63.9532	64.1168	64.1234	64.2816	63.9195	64.4634	63.5333	62.918		62.0565	63.2959	61.7558	62.4801	61.6525	63.0605	60.1072	61.166	61.7337	62.2598	63.5045	63.1141	63.8112	63.4862	63.723	63.4186	63.9289	63.8128	62.0756	63.7798	64.257	64.2463	63.9141	64.7145	64.6617
2480.46	65.5482	64.4888	65.2867	66.0976	65.3677	65.6214	65.5301	65.7373	64.8938	62.5793	63.7311	63.8417	63.4839	63.772	64.4032	64.1246	64.2844	64.2941	64.4509	64.0892	64.6373	63.7097	63.0954		62.2421	63.4674	61.9326	62.661	61.8336	63.239	60.2925	61.3475	61.9126	62.4368	63.6793	63.2819	63.9817	63.6601	63.8938	63.5895	64.1034	63.9854	62.2575	63.9524	64.4279	64.4175	64.0911	64.8836	64.8396
2482.39	65.7179	64.6584	65.4587	66.2639	65.5478	65.7885	65.6984	65.9051	65.0701	62.7597	63.9036	64.0132	63.6543	63.9375	64.5807	64.2924	64.4512	64.4639	64.6216	64.2586	64.812	63.8797	63.2737		62.4242	63.6429	62.1093	62.8376	62.0107	63.4123	60.4725	61.5274	62.0897	62.6119	63.8498	63.4494	64.1481	63.8214	64.061	63.7611	64.2752	64.1559	62.444	64.1241	64.6015	64.5907	64.2621	65.0511	65.0109
2484.32	65.8876	64.8342	65.6387	66.4352	65.723	65.961	65.8657	66.0745	65.2473	62.9406	64.0811	64.1846	63.8338	64.1206	64.7487	64.465	64.6261	64.6409	64.7955	64.4319	64.9887	64.0593	63.4555		62.6044	63.8204	62.2923	63.0265	62.1898	63.5882	60.6586	61.7132	62.269	62.7906	64.023	63.6263	64.3276	63.9911	64.2388	63.9365	64.4539	64.3369	62.632	64.2935	64.7772	64.7648	64.4315	65.2209	65.1801
2486.24	66.0549	65.0122	65.8159	66.6024	65.8856	66.1268	66.0415	66.2412	65.4221	63.1128	64.2547	64.3514	64.0066	64.2938	64.9216	64.6371	64.7999	64.8104	64.9661	64.6019	65.1571	64.2291	63.6313		62.7784	63.9972	62.4719	63.2098	62.3699	63.7722	60.8408	61.8913	62.4484	62.9658	64.1953	63.7977	64.5004	64.1592	64.4115	64.1094	64.627	64.5122	62.8048	64.4661	64.9455	64.9386	64.5984	65.3967	65.3516
2488.17	66.2329	65.1844	65.987	66.7636	66.0523	66.2921	66.2196	66.408	65.5945	63.2858	64.4319	64.5262	64.1749	64.4626	65.1008	64.813	64.9717	64.9768	65.1368	64.7725	65.3359	64.3974	63.8057		62.9587	64.1694	62.6563	63.3822	62.5525	63.9572	61.0226	62.0665	62.6314	63.1391	64.3659	63.969	64.6717	64.3316	64.5824	64.2794	64.8034	64.6895	62.9815	64.6458	65.1208	65.1098	64.7698	65.5798	65.5298
2490.1	66.4073	65.3506	66.1483	66.9299	66.2161	66.4553	66.373	66.566	65.755	63.4595	64.6035	64.6918	64.341	64.6299	65.2591	64.9833	65.1361	65.1498	65.3024	64.9407	65.5062	64.5624	63.972		63.1315	64.3351	62.8298	63.5482	62.7275	64.1253	61.2051	62.2446	62.8047	63.3085	64.5284	64.1339	64.8415	64.5017	64.7547	64.4513	64.9728	64.8574	63.158	64.8138	65.2883	65.2758	64.9321	65.7501	65.6985
2492.03	66.5769	65.5228	66.3124	67.1034	66.3839	66.6185	66.5254	66.7271	65.9157	63.6332	64.771	64.8585	64.5177	64.8006	65.4305	65.1474	65.298	65.315	65.4646	65.1075	65.677	64.7293	64.1439		63.3049	64.5078	63.005	63.7236	62.9017	64.2916	61.3872	62.424	62.9723	63.4767	64.6937	64.2999	65.0128	64.6717	64.926	64.6273	65.1442	65.0252	63.3374	64.9853	65.4557	65.4407	65.0986	65.9106	65.8648
2493.96	66.7345	65.6852	66.4741	67.2658	66.5451	66.7754	66.6836	66.8852	66.0812	63.8	64.9343	65.0191	64.6817	64.966	65.5911	65.3121	65.455	65.4715	65.624	65.2702	65.8448	64.8886	64.308		63.4735	64.6679	63.177	63.9031	63.0726	64.4611	61.5627	62.5923	63.1391	63.6367	64.8557	64.4602	65.171	64.8312	65.0828	64.7849	65.3047	65.184	63.5104	65.1498	65.6162	65.5988	65.2599	66.07	66.0264
2495.89	66.8975	65.847	66.6477	67.4252	66.6989	66.9313	66.8431	67.0419	66.2507	63.9683	65.106	65.1786	64.844	65.131	65.7492	65.4804	65.6145	65.6331	65.7847	65.4297	66.0137	65.0495	64.4756		63.6472	64.8378	63.348	64.0794	63.2445	64.6324	61.7409	62.7636	63.3172	63.8	65.02	64.625	65.3365	64.9945	65.2463	64.9489	65.4681	65.3483	63.6851	65.3151	65.7822	65.7667	65.423	66.2388	66.193
2497.82	67.0555	66.0075	66.8196	67.5791	66.8666	67.0871	67.001	67.202	66.4152	64.1364	65.2737	65.3368	65.0068	65.2868	65.9112	65.6461	65.7731	65.7925	65.9437	65.5876	66.1752	65.2061	64.6407		63.8156	65.0061	63.5121	64.2433	63.4144	64.7962	61.9165	62.9313	63.4915	63.9673	65.1826	64.7831	65.4986	65.1542	65.4088	65.1143	65.6299	65.511	63.8529	65.4766	65.944	65.9321	65.5814	66.4099	66.357
2499.75	67.2207	66.1774	66.9903	67.7424	67.0401	67.2557	67.161	67.3623	66.5768	64.3076	65.4426	65.5033	65.1753	65.4481	66.0754	65.8084	65.9366	65.954	66.1077	65.7548	66.3474	65.3733	64.807		63.9877	65.1733	63.6806	64.4157	63.589	64.9696	62.0914	63.1029	63.6611	64.1333	65.3453	64.9514	65.6661	65.3185	65.576	65.2793	65.7976	65.6762	64.0262	65.6409	66.1028	66.0958	65.7478	66.5832	66.524
2501.67	67.3893	66.3436	67.1505	67.9036	67.1947	67.4157	67.3106	67.5184	66.7366	64.4778	65.6088	65.6687	65.3419	65.6152	66.2336	65.9676	66.1012	66.1159	66.2719	65.9195	66.512	65.5367	64.9755		64.1591	65.3343	63.8507	64.5869	63.7617	65.1378	62.2613	63.2744	63.83	64.2984	65.5103	65.1194	65.8324	65.4826	65.7382	65.4441	65.9642	65.8386	64.1983	65.8057	66.2625	66.2529	65.9167	66.7472	66.6799
2503.6	67.556	66.5025	67.3125	68.0667	67.3648	67.5755	67.47	67.6824	66.8998	64.6471	65.78	65.8319	65.5202	65.7814	66.4064	66.1327	66.2616	66.2841	66.435	66.0831	66.6799	65.7018	65.1464		64.3367	65.5053	64.0269	64.7644	63.9392	65.3051	62.4374	63.4476	64.0059	64.4712	65.6808	65.2843	65.9952	65.6491	65.9041	65.6182	66.1348	66.0076	64.3722	65.9685	66.4355	66.4185	66.0818	66.9029	66.842
2505.53	67.7172	66.6676	67.4788	68.228	67.5282	67.7358	67.6434	67.843	67.0595	64.8141	65.9454	65.9994	65.6895	65.9373	66.5674	66.2958	66.4161	66.4451	66.5892	66.2419	66.8419	65.8594	65.3138		64.5051	65.6732	64.193	64.9357	64.1054	65.4737	62.6145	63.6189	64.1723	64.6394	65.843	65.4501	66.1542	65.8066	66.0658	65.7849	66.2965	66.1705	64.5468	66.127	66.6029	66.5853	66.2385	67.0653	67.0049
2507.46	67.8843	66.8363	67.6493	68.3856	67.6771	67.8943	67.8034	68.001	67.2239	64.9814	66.1112	66.1641	65.8442	66.0983	66.7202	66.4556	66.5715	66.6007	66.7465	66.4018	67.0053	66.02	65.4802		64.6719	65.8383	64.3626	65.0971	64.2719	65.6417	62.7917	63.7874	64.3361	64.8029	66.0013	65.6147	66.3184	65.9704	66.2291	65.9471	66.461	66.3337	64.725	66.2874	66.7628	66.7496	66.4017	67.2342	67.1677
2509.39	68.0408	66.993	67.8029	68.5398	67.823	68.0433	67.9535	68.1509	67.3797	65.1445	66.269	66.3192	66.0008	66.2606	66.8799	66.6101	66.7248	66.7559	66.9041	66.5574	67.1599	66.1753	65.6385		64.8324	65.9984	64.5316	65.2566	64.4388	65.8024	62.9608	63.9531	64.4969	64.9629	66.16	65.7648	66.4758	66.1235	66.3859	66.1062	66.6177	66.4893	64.8874	66.4475	66.9166	66.9006	66.5508	67.3899	67.3212
2511.32	68.1878	67.146	67.9522	68.6945	67.9778	68.1893	68.1079	68.2984	67.5322	65.3082	66.4307	66.4768	66.1654	66.4215	67.0308	66.7627	66.8767	66.91	67.0508	66.7101	67.3181	66.3274	65.7988		64.9943	66.1542	64.695	65.4276	64.6058	65.9649	63.1299	64.1177	64.6595	65.1213	66.3191	65.922	66.6364	66.2728	66.5399	66.2645	66.7754	66.6447	65.0509	66.6029	67.0702	67.0527	66.7006	67.5392	67.4736
2513.25	68.3356	67.3064	68.1014	68.849	68.1284	68.3333	68.2606	68.4484	67.6805	65.4627	66.5874	66.6282	66.3157	66.5687	67.176	66.9195	67.0221	67.0593	67.197	66.8607	67.4698	66.4738	65.9538		65.1555	66.3061	64.8493	65.5844	64.7659	66.1245	63.296	64.2737	64.8206	65.2728	66.4701	66.0821	66.7885	66.4231	66.6879	66.4156	66.9279	66.7964	65.2095	66.7471	67.2148	67.2057	66.8511	67.6831	67.6246
2515.18	68.4904	67.4647	68.2535	68.9997	68.2828	68.4834	68.4179	68.6052	67.8381	65.6153	66.7449	66.7815	66.4617	66.7192	67.3336	67.0806	67.1717	67.2131	67.3502	67.0135	67.6214	66.6343	66.1093		65.32	66.4656	65.0076	65.7387	64.9287	66.2849	63.4649	64.4369	64.9846	65.4287	66.623	66.2368	66.9389	66.5779	66.8432	66.5806	67.084	66.9516	65.3713	66.9007	67.3614	67.3649	67.0033	67.8413	67.7809
2517.1	68.6499	67.6146	68.4045	69.1509	68.4289	68.6351	68.5714	68.7557	67.9883	65.7766	66.9008	66.9342	66.6122	66.8727	67.4815	67.228	67.3227	67.3612	67.5033	67.1674	67.7741	66.7858	66.2649		65.4811	66.6217	65.1681	65.8958	65.0897	66.4356	63.6316	64.6025	65.144	65.5843	66.7806	66.388	67.0955	66.7338	66.9971	66.7402	67.2368	67.1044	65.5286	67.0515	67.5136	67.52	67.1565	68.0013	67.931
2519.03	68.8166	67.7663	68.559	69.3085	68.5826	68.7867	68.7204	68.9038	68.1353	65.9408	67.0576	67.0896	66.7772	67.0356	67.6396	67.3723	67.4742	67.5129	67.6581	67.3209	67.9356	66.941	66.4233		65.644	66.783	65.3319	66.0626	65.2521	66.592	63.7985	64.7671	65.3018	65.7434	66.9394	66.5499	67.2503	66.8917	67.1556	66.8978	67.3915	67.2605	65.689	67.2095	67.6694	67.6732	67.314	68.1607	68.0771
2520.96	68.9749	67.9265	68.7121	69.4642	68.7388	68.9403	68.8692	69.0543	68.2879	66.0974	67.2164	67.2416	66.9391	67.1897	67.794	67.5216	67.6229	67.6672	67.8061	67.4718	68.0848	67.097	66.5838		65.8045	66.9477	65.4872	66.2249	65.4134	66.753	63.9666	64.9316	65.4598	65.8986	67.0935	66.7116	67.4073	67.0459	67.3119	67.0531	67.5437	67.4095	65.8523	67.3668	67.8182	67.8268	67.4685	68.3103	68.2265
2522.89	69.1302	68.0834	68.8746	69.6174	68.8951	69.0966	69.0255	69.208	68.4445	66.2543	67.3814	67.4034	67.1006	67.3445	67.9388	67.6818	67.7726	67.8221	67.9562	67.6265	68.2398	67.253	66.7514		65.9675	67.1105	65.6435	66.3944	65.5767	66.9153	64.1392	65.1007	65.6221	66.0511	67.2509	66.8735	67.5706	67.2014	67.4651	67.2113	67.701	67.5676	66.0225	67.5316	67.9762	67.9793	67.6195	68.4631	68.3795
2524.82	69.2683	68.2256	69.0251	69.7577	69.0447	69.2414	69.1741	69.3561	68.5851	66.4079	67.5341	67.5635	67.2518	67.4937	68.09	67.8375	67.9171	67.9676	68.1014	67.7769	68.3903	67.3965	66.903		66.123	67.2625	65.8036	66.5532	65.7369	67.0677	64.3065	65.2614	65.7779	66.2033	67.4004	67.0217	67.7215	67.3482	67.6143	67.3604	67.8513	67.7191	66.1818	67.6886	68.1241	68.1213	67.7599	68.6057	68.5273
2526.75	69.4099	68.3729	69.169	69.9081	69.1892	69.3778	69.3207	69.5027	68.7207	66.5606	67.6911	67.7228	67.3983	67.6398	68.2353	67.9809	68.0607	68.1148	68.2472	67.9241	68.5393	67.5425	67.0511		66.2787	67.4179	65.9655	66.7014	65.8937	67.2199	64.4676	65.4188	65.9311	66.3584	67.5533	67.1725	67.8722	67.4956	67.7683	67.5134	68.0039	67.8705	66.33	67.83	68.2614	68.2676	67.9006	68.7491	68.6768
2528.68	69.5527	68.5217	69.3102	70.062	69.3252	69.5111	69.465	69.6391	68.8681	66.7115	67.8371	67.8614	67.5432	67.7802	68.3677	68.1173	68.1963	68.2629	68.3896	68.0663	68.682	67.6806	67.1958		66.4299	67.5623	66.1114	66.8495	66.0421	67.3674	64.6191	65.5639	66.0798	66.5009	67.696	67.3183	68.0133	67.636	67.909	67.6543	68.1461	68.0134	66.4768	67.9676	68.3977	68.404	68.0351	68.8852	68.8153
2530.61	69.6928	68.6611	69.4491	70.2053	69.4587	69.6511	69.6008	69.7745	69.0158	66.8578	67.982	67.9947	67.6962	67.9293	68.5176	68.2585	68.3302	68.3995	68.5255	68.2048	68.8315	67.82	67.3382		66.5792	67.7007	66.2512	66.9981	66.1925	67.5113	64.7701	65.7081	66.2262	66.6383	67.8328	67.4657	68.1548	67.7792	68.0554	67.8003	68.2869	68.1552	66.629	68.108	68.5396	68.5388	68.1758	69.0259	68.9524
2532.54	69.8269	68.7895	69.5793	70.3362	69.5942	69.7879	69.7405	69.9104	69.1566	67.0035	68.1237	68.1357	67.8411	68.0731	68.6523	68.4028	68.4649	68.5335	68.661	68.3429	68.9695	67.9542	67.4763		66.7259	67.8401	66.3957	67.1385	66.3373	67.6584	64.9213	65.8553	66.3745	66.7802	67.9697	67.6042	68.2951	67.9201	68.1973	67.9434	68.4239	68.2926	66.7793	68.2418	68.6759	68.6816	68.312	69.1629	69.0857
2534.46	69.9762	68.9274	69.7151	70.4696	69.7324	69.9201	69.8781	70.0504	69.2946	67.1484	68.2663	68.2784	67.98	68.2119	68.7831	68.5473	68.6048	68.6746	68.8015	68.4854	69.1041	68.0928	67.62		66.8759	67.9874	66.5499	67.2806	66.4838	67.8068	65.0723	66.0039	66.522	66.9284	68.1091	67.7531	68.4405	68.0656	68.3355	68.0821	68.5675	68.435	66.9271	68.383	68.8119	68.8269	68.4486	69.2969	69.2237
2536.39	70.1273	69.0685	69.8488	70.6053	69.8628	70.0533	70.0071	70.1867	69.4322	67.2851	68.4072	68.4172	68.1177	68.3493	68.9217	68.6806	68.7411	68.8111	68.9383	68.6252	69.2458	68.2285	67.7672		67.0207	68.1294	66.6979	67.4289	66.63	67.9489	65.2223	66.1518	66.6627	67.0666	68.2458	67.8984	68.5832	68.2128	68.476	68.2239	68.707	68.574	67.0694	68.5236	68.9466	68.9644	68.5831	69.4347	69.3563
2538.32	70.2601	69.2154	69.9809	70.7477	69.9996	70.1951	70.1485	70.3242	69.5677	67.4267	68.5537	68.5727	68.2678	68.4903	69.0583	68.8162	68.879	68.9495	69.0742	68.7635	69.3877	68.3698	67.9194		67.1648	68.2688	66.8441	67.5814	66.782	68.0996	65.3714	66.2989	66.8084	67.2097	68.3889	68.0471	68.7313	68.3622	68.6277	68.3743	68.8548	68.7207	67.2167	68.6658	69.0859	69.0965	68.723	69.5806	69.4879
2540.25	70.3866	69.3598	70.116	70.8799	70.1393	70.3289	70.2819	70.455	69.6979	67.5713	68.6919	68.7169	68.4097	68.6353	69.2	68.9553	69.0107	69.0853	69.2071	68.897	69.5192	68.5076	68.0576		67.3046	68.4142	66.9905	67.7254	66.9295	68.2416	65.5173	66.4415	66.9551	67.3526	68.5237	68.1914	68.8717	68.5012	68.767	68.5163	68.9973	68.8606	67.3604	68.8095	69.2191	69.227	68.8549	69.7092	69.6232
2542.18	70.5203	69.4983	70.2611	71.0084	70.2803	70.4591	70.4115	70.5865	69.8332	67.7161	68.8343	68.8517	68.5449	68.7886	69.3435	69.0968	69.1393	69.2229	69.3397	69.0319	69.656	68.6394	68.199		67.4512	68.5665	67.1358	67.8776	67.0711	68.3799	65.6682	66.5829	67.0962	67.4903	68.6517	68.3366	69.0131	68.641	68.9076	68.6585	69.1356	68.9928	67.5117	68.955	69.3604	69.367	68.9821	69.8354	69.7601
2544.11	70.6548	69.6264	70.3912	71.1376	70.4063	70.5845	70.5554	70.7117	69.962	67.8505	68.9736	68.9871	68.6781	68.9208	69.4612	69.2343	69.2622	69.3499	69.4658	69.1611	69.7848	68.7699	68.3349		67.593	68.7041	67.2719	68.0158	67.2079	68.5098	65.8159	66.7266	67.2297	67.6221	68.7831	68.4735	69.1432	68.7672	69.0351	68.7938	69.2652	69.1184	67.6518	69.0845	69.4957	69.4955	69.1094	69.9706	69.8863
2546.04	70.7896	69.755	70.5151	71.2708	70.5224	70.7067	70.6841	70.8357	70.0858	67.9822	69.1111	69.1198	68.8151	69.0424	69.588	69.3638	69.3874	69.4779	69.5948	69.2887	69.915	68.9039	68.4696		67.7283	68.8316	67.4055	68.1386	67.3453	68.6437	65.9602	66.869	67.363	67.7556	68.9127	68.6089	69.2732	68.8953	69.1636	68.9258	69.3951	69.2507	67.7903	69.2116	69.6178	69.6193	69.2345	70.098	70.0157
2547.97	70.9105	69.8761	70.6373	71.3876	70.6434	70.8248	70.7954	70.956	70.2071	68.1076	69.234	69.2438	68.9395	69.1628	69.7149	69.4837	69.5094	69.6057	69.7165	69.4119	70.0366	69.0228	68.5981		67.8556	68.9523	67.5375	68.2644	67.476	68.7741	66.0928	66.9989	67.4913	67.8801	69.0341	68.7376	69.4004	69.0248	69.2923	69.0467	69.5194	69.3756	67.9243	69.338	69.7322	69.735	69.3467	70.211	70.1329
2549.89	71.0294	70.0071	70.7552	71.5093	70.7675	70.9428	70.9076	71.0756	70.3337	68.2311	69.3569	69.3747	69.0595	69.2865	69.8257	69.6031	69.6271	69.7278	69.8353	69.5359	70.1577	69.1461	68.7189		67.9918	69.0792	67.6724	68.4028	67.6029	68.8945	66.2261	67.1279	67.6206	68.0016	69.1585	68.8583	69.5293	69.1519	69.4172	69.1675	69.6454	69.5025	68.0621	69.4689	69.8519	69.849	69.4639	70.3278	70.2516
2551.82	71.1445	70.1242	70.8683	71.6325	70.8848	71.0577	71.0221	71.1891	70.4621	68.3515	69.4819	69.4945	69.1765	69.4035	69.9408	69.7222	69.7414	69.8437	69.9568	69.6563	70.2725	69.2644	68.8389		68.1206	69.2069	67.7936	68.5287	67.7251	69.0148	66.362	67.2578	67.748	68.1209	69.2802	68.9773	69.6532	69.2715	69.536	69.2889	69.7659	69.6281	68.1857	69.5951	69.9606	69.9614	69.583	70.4482	70.3673
2553.75	71.257	70.2406	70.9834	71.7536	70.9978	71.1751	71.1453	71.3049	70.5753	68.476	69.6102	69.6222	69.3057	69.5177	70.0639	69.8491	69.8578	69.9639	70.0768	69.7778	70.3978	69.3856	68.9687		68.2488	69.3318	67.9207	68.6541	67.8521	69.1417	66.4971	67.3911	67.8758	68.2436	69.4063	69.1103	69.7834	69.3997	69.6636	69.4123	69.8911	69.7559	68.3083	69.7115	70.0743	70.0734	69.6979	70.5724	70.4811
2555.68	71.3671	70.36	71.0976	71.8674	71.1126	71.2886	71.2549	71.4168	70.6788	68.5991	69.7333	69.7445	69.4253	69.6351	70.1743	69.9691	69.9727	70.0824	70.1891	69.8957	70.514	69.5034	69.0883		68.3753	69.4426	68.0484	68.7689	67.9732	69.2625	66.6325	67.5195	67.9958	68.3656	69.5239	69.2349	69.9032	69.5179	69.7851	69.5358	70.01	69.8767	68.4315	69.8329	70.1902	70.1867	69.8115	70.6823	70.593
2557.61	71.4878	70.482	71.217	71.9791	71.2293	71.4003	71.3593	71.5297	70.7883	68.7207	69.8517	69.8674	69.5402	69.7619	70.3	70.093	70.0887	70.1994	70.3019	70.0109	70.6382	69.6239	69.213		68.5033	69.5637	68.1711	68.8937	68.0952	69.3846	66.767	67.6501	68.1192	68.4868	69.6376	69.3591	70.0253	69.6412	69.9092	69.6656	70.1353	70.0004	68.5645	69.9593	70.3102	70.3028	69.9303	70.8006	70.7128
2559.54	71.5999	70.5871	71.3235	72.0852	71.344	71.5065	71.4705	71.6409	70.9033	68.8378	69.9704	69.9859	69.6574	69.8796	70.4158	70.2131	70.2008	70.3119	70.4097	70.1219	70.7565	69.7375	69.3396		68.622	69.686	68.2861	69.021	68.2144	69.4987	66.8949	67.7747	68.2413	68.6013	69.7515	69.4749	70.1411	69.7597	70.0263	69.7741	70.2562	70.1176	68.689	70.0736	70.4254	70.4021	70.0407	70.9205	70.8237
2561.47	71.7008	70.6974	71.4308	72.1917	71.4532	71.6121	71.5853	71.7477	71.0173	68.9556	70.09	70.1065	69.7732	69.988	70.522	70.3272	70.3102	70.4239	70.5202	70.2357	70.8675	69.8483	69.4567		68.7435	69.8126	68.4047	69.1432	68.3323	69.6114	67.0219	67.8957	68.3562	68.7139	69.8691	69.5876	70.2567	69.8717	70.1361	69.8831	70.3768	70.237	68.8094	70.197	70.5432	70.5117	70.1458	71.0345	70.9308
2563.4	71.8033	70.8088	71.5308	72.2851	71.5541	71.7107	71.6939	71.847	71.119	69.0649	70.1934	70.2167	69.8741	70.0907	70.626	70.4352	70.4093	70.5296	70.6266	70.3409	70.9707	69.9529	69.5591		68.8582	69.9235	68.518	69.251	68.4434	69.718	67.1382	68.0075	68.4633	68.8191	69.98	69.6853	70.365	69.9777	70.2391	69.9923	70.4832	70.341	68.9206	70.3107	70.6475	70.6143	70.2451	71.1285	71.0348
2565.33	71.9132	70.9135	71.6367	72.378	71.651	71.8055	71.7885	71.9463	71.2172	69.1673	70.2969	70.3231	69.9776	70.2002	70.7224	70.5389	70.5102	70.6331	70.7256	70.4403	71.0809	70.0567	69.6651		68.9678	70.026	68.6294	69.3566	68.5523	69.8241	67.2465	68.1123	68.5661	68.9178	70.0792	69.7898	70.4704	70.0825	70.3446	70.0977	70.5875	70.4455	69.0283	70.421	70.7415	70.7087	70.3456	71.2299	71.1354
2567.25	72.0037	71.004	71.7418	72.4738	71.744	71.8931	71.8715	72.0365	71.3111	69.2665	70.3952	70.4192	70.0762	70.3009	70.8125	70.6368	70.6062	70.7285	70.8171	70.5362	71.18	70.1453	69.7619		69.0696	70.1218	68.7318	69.4617	68.6534	69.9186	67.3551	68.2179	68.662	69.0161	70.1654	69.8946	70.5674	70.1821	70.4403	70.1923	70.6876	70.5474	69.1233	70.5195	70.8343	70.7963	70.4439	71.3308	71.2333
2569.18	72.0895	71.0983	71.8444	72.5706	71.8405	71.9845	71.9589	72.1216	71.4069	69.3643	70.4979	70.5153	70.1732	70.3907	70.9208	70.7366	70.6982	70.8236	70.913	70.6305	71.2798	70.2386	69.8624		69.174	70.2194	68.828	69.5662	68.7511	70.016	67.4654	68.3237	68.7639	69.1169	70.256	69.994	70.6609	70.2851	70.5434	70.2993	70.7899	70.6512	69.224	70.622	70.9308	70.8926	70.5356	71.424	71.3333
2571.11	72.1735	71.1898	71.9349	72.6571	71.9363	72.0714	72.0488	72.2041	71.497	69.4595	70.5966	70.6133	70.2629	70.4748	71.0142	70.8315	70.7888	70.9186	71.0033	70.722	71.377	70.3363	69.9637		69.2689	70.3127	68.9208	69.6513	68.8482	70.1134	67.5717	68.4235	68.8671	69.2065	70.3453	70.0807	70.7522	70.3783	70.6419	70.3944	70.8801	70.7431	69.3273	70.7168	71.0267	70.983	70.6209	71.5149	71.4181
2573.04	72.2619	71.2827	72.0209	72.7423	72.0213	72.1539	72.1339	72.2892	71.5894	69.5567	70.6917	70.7131	70.3604	70.5712	71.0997	70.9301	70.8781	71.0099	71.0936	70.8159	71.472	70.4358	70.0631		69.366	70.4028	69.0213	69.7464	68.9487	70.2108	67.674	68.5251	68.9689	69.2955	70.4373	70.1757	70.8496	70.4723	70.7327	70.4816	70.9733	70.8375	69.4318	70.8115	71.124	71.0783	70.7139	71.6099	71.5046
2574.97	72.3546	71.3797	72.1026	72.8268	72.1051	72.2335	72.2181	72.3725	71.6725	69.653	70.779	70.8029	70.4527	70.6652	71.1962	71.0243	70.9666	71.0965	71.1791	70.9063	71.5566	70.5203	70.1516		69.4619	70.4919	69.1199	69.851	69.0482	70.3021	67.7721	68.6213	69.0583	69.3918	70.5274	70.2699	70.9396	70.5602	70.8181	70.5673	71.0661	70.9251	69.5272	70.9081	71.21	71.169	70.8014	71.7045	71.593
2576.9	72.4509	71.479	72.1957	72.9112	72.1956	72.3179	72.3146	72.4579	71.758	69.745	70.8772	70.8956	70.543	70.7561	71.2858	71.115	71.0601	71.1858	71.2616	70.9917	71.649	70.6132	70.2435		69.5616	70.5965	69.2171	69.9477	69.1441	70.3932	67.8727	68.7163	69.1508	69.4898	70.618	70.3682	71.0344	70.6508	70.9134	70.6586	71.1663	71.0176	69.6265	71.0088	71.2991	71.2552	70.8925	71.7984	71.684
2578.83	72.5355	71.5615	72.2749	72.986	72.2709	72.399	72.3938	72.5348	71.841	69.8242	70.9669	70.9842	70.6263	70.8349	71.3641	71.2011	71.1434	71.2715	71.3449	71.0746	71.7317	70.7	70.3318		69.6485	70.6868	69.3037	70.0274	69.2271	70.4811	67.9664	68.8059	69.2388	69.5696	70.7015	70.4476	71.1241	70.7344	71.0033	70.7438	71.2553	71.1077	69.7165	71.0948	71.3799	71.3333	70.9713	71.8727	71.7699
2580.76	72.6193	71.6339	72.3499	73.0727	72.3421	72.4732	72.4637	72.6072	71.9219	69.9019	71.0482	71.067	70.7134	70.9151	71.4517	71.2856	71.2162	71.3517	71.4298	71.1555	71.8158	70.7808	70.4174		69.7316	70.7702	69.3918	70.1169	69.3135	70.5715	68.0511	68.891	69.321	69.6474	70.7814	70.5294	71.2051	70.8173	71.0868	70.8263	71.3419	71.1962	69.7966	71.1746	71.4598	71.4152	71.0491	71.9529	71.8545
2582.68	72.6916	71.6988	72.4254	73.1439	72.4196	72.5383	72.5331	72.6749	71.9871	69.9814	71.1202	71.1395	70.7932	70.9894	71.5196	71.3616	71.2858	71.422	71.5068	71.2294	71.8868	70.8514	70.4925		69.8069	70.8477	69.4676	70.1869	69.3911	70.6485	68.1285	68.9679	69.3965	69.7235	70.8508	70.6082	71.2776	70.8958	71.1568	70.9027	71.4199	71.2713	69.873	71.2426	71.532	71.4903	71.1205	72.0321	71.9256
2584.61	72.756	71.7674	72.5059	73.1976	72.4847	72.6032	72.5963	72.7423	72.0526	70.0551	71.1962	71.2076	70.8628	71.0545	71.591	71.4321	71.3568	71.4914	71.5718	71.2971	71.9576	70.9257	70.5689		69.8802	70.9244	69.5412	70.2568	69.466	70.7202	68.2062	69.0448	69.4711	69.7988	70.9169	70.6768	71.3536	70.9716	71.2293	70.9826	71.4953	71.3487	69.9574	71.3208	71.6077	71.5592	71.1914	72.1039	71.9979
2586.54	72.8117	71.8329	72.5712	73.2539	72.5438	72.6669	72.6476	72.8002	72.12	70.1164	71.2591	71.2732	70.9247	71.1158	71.662	71.4971	71.4221	71.5584	71.6308	71.3601	72.0269	70.9896	70.6392		69.9503	70.9867	69.6143	70.3333	69.536	70.7895	68.276	69.1107	69.538	69.8571	70.9785	70.7372	71.4189	71.035	71.2977	71.0518	71.559	71.4163	70.0277	71.3913	71.6768	71.6197	71.2541	72.1662	72.0621
2588.47	72.8755	71.8968	72.6325	73.3157	72.6134	72.7281	72.708	72.8608	72.1873	70.1797	71.324	71.3431	70.9905	71.1856	71.7205	71.5706	71.4856	71.6209	71.6927	71.4225	72.0977	71.0546	70.7094		70.0255	71.0475	69.6874	70.4067	69.6043	70.8603	68.3457	69.1772	69.6066	69.9182	71.0421	70.8055	71.4852	71.099	71.3656	71.1174	71.6265	71.4832	70.0966	71.4602	71.7364	71.6832	71.3207	72.2344	72.1285
2590.4	72.9305	71.9571	72.6998	73.3749	72.675	72.7857	72.7712	72.9179	72.2512	70.2458	71.3881	71.4019	71.0484	71.2484	71.7795	71.6381	71.5447	71.6823	71.7539	71.4807	72.1596	71.1107	70.767		70.0901	71.1036	69.7514	70.4684	69.6674	70.9221	68.4151	69.243	69.6703	69.9859	71.1003	70.8677	71.5446	71.1545	71.4251	71.1777	71.6882	71.5462	70.1646	71.5234	71.7947	71.7472	71.384	72.296	72.1929
2592.33	72.9891	72.0222	72.7776	73.433	72.7324	72.8433	72.8263	72.9719	72.3098	70.3097	71.4551	71.4654	71.1145	71.3134	71.8437	71.6985	71.6055	71.7416	71.8146	71.5439	72.2274	71.1707	70.8324		70.1546	71.1605	69.8185	70.5318	69.7324	70.9806	68.4837	69.3097	69.7306	70.0484	71.1574	70.9306	71.6037	71.214	71.4888	71.2415	71.7553	71.6132	70.2329	71.5813	71.8633	71.8103	71.4443	72.3563	72.2527
2594.26	73.0474	72.0777	72.8352	73.4897	72.7926	72.8955	72.8815	73.024	72.3593	70.3666	71.5184	71.5315	71.1736	71.3693	71.891	71.7533	71.662	71.7945	71.8709	71.6014	72.2836	71.2304	70.895		70.214	71.2147	69.8761	70.5902	69.7924	71.0382	68.5509	69.3756	69.7911	70.1018	71.212	70.9854	71.6595	71.2697	71.5453	71.2966	71.8173	71.6706	70.2953	71.6391	71.9172	71.865	71.503	72.4117	72.3065
2596.19	73.1085	72.1357	72.8811	73.5389	72.8475	72.9462	72.9373	73.0797	72.4222	70.4205	71.5766	71.5868	71.2276	71.4253	71.9561	71.8081	71.7175	71.8489	71.9237	71.6534	72.3454	71.2902	70.9555		70.2753	71.2798	69.9324	70.6451	69.8458	71.094	68.6193	69.4399	69.8502	70.1582	71.2699	71.0425	71.7189	71.3273	71.5999	71.3531	71.8796	71.7286	70.3602	71.7095	71.9644	71.9185	71.5658	72.4719	72.3649
2598.12	73.1649	72.1818	72.9219	73.5777	72.8944	72.9911	72.9812	73.1247	72.4715	70.467	71.6236	71.6324	71.2759	71.4776	72.004	71.8641	71.7616	71.8975	71.9676	71.6998	72.395	71.3365	71.0026		70.3272	71.3351	69.9847	70.6897	69.8978	71.1428	68.6723	69.4916	69.9	70.2127	71.3126	71.0919	71.7659	71.3731	71.6454	71.4038	71.9296	71.7783	70.4134	71.7567	72.0128	71.9673	71.6128	72.5244	72.4165
2600.04	73.2067	72.2235	72.9688	73.6239	72.9279	73.0397	73.0158	73.1634	72.5027	70.513	71.6744	71.6803	71.3236	71.5202	72.0428	71.9194	71.8008	71.9404	72.0136	71.7448	72.4413	71.3797	71.0466		70.3724	71.3927	70.0368	70.7385	69.9505	71.1928	68.7172	69.5376	69.9442	70.2576	71.3556	71.1392	71.8123	71.416	71.6919	71.4547	71.976	71.8274	70.4643	71.8008	72.057	72.0147	71.6575	72.5717	72.4659
2601.97	73.2336	72.2719	73.0115	73.6568	72.9593	73.0734	73.0478	73.197	72.5335	70.5503	71.7177	71.7161	71.3611	71.5493	72.0873	71.9482	71.8335	71.9762	72.0517	71.7815	72.4865	71.4166	71.084		70.4099	71.434	70.0765	70.7845	69.9905	71.2281	68.7585	69.575	69.9798	70.2903	71.3974	71.1765	71.8564	71.455	71.7293	71.4961	72.0089	71.8601	70.5069	71.8359	72.0914	72.0546	71.6905	72.6071	72.5054
2603.9	73.2638	72.3034	73.045	73.6844	72.9889	73.0993	73.0851	73.2291	72.5579	70.5819	71.7537	71.7529	71.3924	71.5811	72.1135	71.9712	71.87	72.0095	72.0804	71.8152	72.5285	71.4591	71.1181		70.4498	71.4702	70.1156	70.8305	70.026	71.2637	68.8006	69.6134	70.0165	70.3264	71.4332	71.2104	71.89	71.491	71.7638	71.5343	72.0485	71.8998	70.5475	71.8725	72.1247	72.096	71.7193	72.634	72.5388
2605.83	73.2962	72.3299	73.0755	73.718	73.0086	73.1199	73.1135	73.257	72.5926	70.6122	71.7821	71.789	71.4212	71.6158	72.1417	72.0058	71.9003	72.035	72.108	71.8434	72.5594	71.491	71.1527		70.4842	71.4986	70.1489	70.8627	70.0584	71.3037	68.8319	69.6488	70.0463	70.3586	71.4582	71.2327	71.9089	71.5148	71.7964	71.5667	72.0769	71.9328	70.5774	71.9105	72.1542	72.1271	71.7497	72.6627	72.5701
2607.76	73.3302	72.361	73.1096	73.7537	73.0338	73.1466	73.1462	73.2841	72.632	70.6475	71.8107	71.8248	71.4538	71.6487	72.183	72.0551	71.929	72.0599	72.1389	71.8692	72.5944	71.5198	71.1868		70.518	71.522	70.1769	70.8906	70.0928	71.3392	68.8638	69.6811	70.0761	70.3801	71.4832	71.2635	71.9415	71.541	71.8297	71.5985	72.1075	71.9607	70.6046	71.9476	72.1844	72.154	71.7828	72.697	72.6015
2609.69	73.352	72.3848	73.1376	73.7782	73.0669	73.1707	73.1768	73.3085	72.662	70.6719	71.8357	71.8561	71.4812	71.6725	72.1964	72.0852	71.9552	72.0852	72.1548	71.8905	72.6187	71.5408	71.2109		70.5428	71.5429	70.1984	70.91	70.1204	71.3614	68.8916	69.7048	70.1013	70.4021	71.5044	71.2949	71.9721	71.569	71.8529	71.6222	72.1333	71.9851	70.6263	71.9662	72.2083	72.1805	71.8076	72.7261	72.6237
2611.62	73.378	72.4131	73.1639	73.7959	73.0914	73.1972	73.1989	73.3331	72.683	70.6891	71.8706	71.8832	71.5156	71.6989	72.2197	72.0952	71.9792	72.1094	72.1756	71.9149	72.6409	71.5739	71.2379		70.5736	71.5791	70.2274	70.9326	70.1487	71.3874	68.92	69.7279	70.1287	70.433	71.5277	71.326	71.9983	71.6017	71.8778	71.6492	72.1623	72.013	70.6609	71.9868	72.2331	72.2136	71.8396	72.7579	72.6485
2613.55	73.3977	72.4358	73.1884	73.8128	73.1053	73.2157	73.207	73.3513	72.6896	70.7041	71.8938	71.8968	71.5362	71.715	72.2451	72.1007	71.9966	72.1274	72.1973	71.9306	72.6565	71.5923	71.2601		70.5948	71.6058	70.2514	70.9591	70.1712	71.4117	68.9427	69.7457	70.1512	70.4535	71.5461	71.3439	72.0113	71.6178	71.894	71.6649	72.1817	72.0284	70.6832	72.0084	72.2543	72.2364	71.8631	72.7815	72.6714
2615.47	73.4125	72.4537	73.2071	73.8307	73.1207	73.2285	73.2171	73.3631	72.7057	70.7208	71.9108	71.9096	71.5487	71.7337	72.2548	72.119	72.0084	72.1429	72.2107	71.9441	72.6772	71.6053	71.282		70.6109	71.6278	70.2733	70.9847	70.1889	71.4276	68.9617	69.7677	70.1664	70.4682	71.5658	71.3663	72.0274	71.6349	71.9078	71.6835	72.2011	72.0486	70.7057	72.0254	72.2709	72.2497	71.8815	72.7934	72.6925
2617.4	73.4326	72.4604	73.2081	73.8424	73.1335	73.2307	73.2277	73.3667	72.7229	70.7289	71.9228	71.9214	71.5585	71.7481	72.2645	72.138	72.015	72.1526	72.2204	71.9575	72.6858	71.6178	71.2869		70.6221	71.6369	70.2861	71.0023	70.1999	71.4365	68.9771	69.7838	70.1735	70.4829	71.581	71.3786	72.0424	71.6449	71.9165	71.6925	72.209	72.0582	70.7206	72.0343	72.28	72.2543	71.8867	72.797	72.701
2619.33	73.4478	72.4679	73.2178	73.8491	73.1439	73.2341	73.2355	73.3692	72.7268	70.7351	71.9314	71.9312	71.5646	71.7527	72.2744	72.149	72.0158	72.1574	72.2244	71.9637	72.6915	71.6246	71.2932		70.6344	71.647	70.2938	71.01	70.2078	71.4431	68.9904	69.7963	70.181	70.4919	71.5881	71.3917	72.0508	71.6504	71.9261	71.6919	72.217	72.0658	70.7277	72.0497	72.2943	72.2596	71.8913	72.8038	72.706
2621.26	73.4448	72.4655	73.2154	73.8504	73.1409	73.2303	73.2395	73.3649	72.7148	70.7277	71.9261	71.9223	71.5602	71.7468	72.2623	72.1395	72.0106	72.1474	72.2169	71.9602	72.6919	71.6174	71.2915		70.6366	71.6492	70.2936	71.0017	70.2071	71.4381	68.9892	69.7916	70.1787	70.4825	71.58	71.3933	72.0488	71.6446	71.9289	71.6961	72.2216	72.0651	70.7295	72.0533	72.2954	72.2542	71.8859	72.7951	72.6989
2623.19	73.4377	72.4533	73.1999	73.8398	73.1274	73.2268	73.2413	73.3582	72.7026	70.7152	71.9252	71.9216	71.5578	71.7428	72.2587	72.1283	72.0017	72.1371	72.2124	71.953	72.6918	71.6149	71.2864		70.6311	71.648	70.2883	70.9993	70.207	71.44	68.9784	69.7788	70.1704	70.4688	71.5682	71.3816	72.0464	71.6406	71.9268	71.7015	72.221	72.0621	70.7296	72.0503	72.2803	72.2521	71.8771	72.7898	72.6873
2625.12	73.4247	72.4365	73.1872	73.8256	73.1129	73.2198	73.2286	73.3493	72.6958	70.7062	71.9177	71.9216	71.5506	71.731	72.2463	72.1221	71.9893	72.1254	72.1989	71.9356	72.6841	71.6072	71.2744		70.6168	71.643	70.2737	70.9891	70.1969	71.4341	68.9684	69.771	70.1566	70.461	71.5544	71.3681	72.0318	71.632	71.9098	71.6908	72.207	72.0497	70.7157	72.0346	72.261	72.2433	71.8691	72.7838	72.6772
2627.05	73.423	72.4396	73.1891	73.8207	73.1037	73.2146	73.2245	73.3478	72.6886	70.7012	71.9132	71.9196	71.5437	71.7259	72.2283	72.1223	71.9841	72.1192	72.1893	71.925	72.6824	71.6033	71.2664		70.6146	71.644	70.2681	70.9861	70.1923	71.4266	68.9653	69.7683	70.1471	70.4545	71.5497	71.3701	72.0284	71.6309	71.9037	71.6843	72.2	72.0448	70.7059	72.0294	72.257	72.2399	71.8646	72.7738	72.6746
2628.98	73.4157	72.4314	73.1816	73.8137	73.0903	73.2007	73.219	73.3363	72.6775	70.6917	71.9016	71.9056	71.535	71.7194	72.2264	72.1141	71.9742	72.1148	72.1797	71.9183	72.6686	71.5928	71.2598		70.6048	71.6335	70.2618	70.9763	70.1813	71.4139	68.9543	69.7532	70.1366	70.442	71.541	71.3666	72.0209	71.6246	71.8944	71.6739	72.1883	72.0329	70.6925	72.0233	72.2456	72.2299	71.8475	72.7585	72.6664
2630.91	73.4046	72.4115	73.1677	73.803	73.075	73.189	73.207	73.324	72.6678	70.6766	71.8882	71.8964	71.5318	71.7089	72.2114	72.0948	71.9589	72.1	72.1681	71.9073	72.6594	71.5924	71.2565		70.5862	71.619	70.2499	70.964	70.1619	71.4056	68.9412	69.7405	70.1249	70.4333	71.5256	71.3618	72.0098	71.6141	71.8841	71.6624	72.1813	72.0222	70.6783	72.0075	72.2319	72.2194	71.8348	72.7407	72.6545
2632.83	73.3806	72.3888	73.1396	73.781	73.048	73.1697	73.184	73.3034	72.6465	70.6486	71.8681	71.8772	71.5075	71.6863	72.179	72.0654	71.9324	72.0728	72.1395	71.8822	72.6424	71.5711	71.2374		70.5632	71.5962	70.2265	70.9479	70.1371	71.3881	68.9191	69.7198	70.1031	70.4133	71.5041	71.3397	71.9908	71.5938	71.8629	71.6397	72.1642	72.0075	70.6614	71.9817	72.2105	72.2001	71.8117	72.7122	72.6279
2634.76	73.3569	72.3725	73.1153	73.7557	73.0253	73.146	73.1564	73.2818	72.6169	70.6183	71.8486	71.8552	71.4827	71.6657	72.1607	72.044	71.905	72.0537	72.1132	71.8594	72.6206	71.5442	71.2156		70.5442	71.5788	70.207	70.9176	70.113	71.3627	68.8974	69.6975	70.082	70.3876	71.4847	71.3217	71.968	71.5755	71.8442	71.6255	72.1425	71.9861	70.6474	71.9651	72.189	72.1778	71.7911	72.6921	72.6001
2636.69	73.3224	72.3405	73.0848	73.7269	72.9943	73.1108	73.1161	73.2526	72.5816	70.5832	71.8193	71.8263	71.4518	71.6293	72.1292	72.0215	71.8703	72.0226	72.0824	71.8254	72.5884	71.504	71.1799		70.5129	71.5513	70.1756	70.8747	70.0816	71.3249	68.8651	69.6664	70.0471	70.3518	71.4541	71.2932	71.9375	71.5422	71.8154	71.5982	72.1116	71.9531	70.6181	71.9319	72.151	72.1414	71.7593	72.6573	72.5648
2638.62	73.287	72.3045	73.0483	73.7044	72.9577	73.0731	73.094	73.2201	72.5569	70.5527	71.7867	71.8015	71.4225	71.5941	72.0949	71.9942	71.8351	71.9857	72.0443	71.7889	72.559	71.466	71.1499		70.4792	71.5245	70.142	70.8427	70.0532	71.2954	68.8302	69.6322	70.0071	70.3226	71.4169	71.2645	71.9116	71.5069	71.7885	71.5631	72.0826	71.9231	70.5905	71.9007	72.118	72.1076	71.7257	72.6201	72.5299
2640.55	73.2506	72.2671	73.0095	73.6734	72.9186	73.03	73.065	73.1798	72.5187	70.5145	71.7479	71.7642	71.3824	71.5595	72.0589	71.9592	71.8007	71.9465	72.0049	71.7519	72.5203	71.4307	71.1134		70.444	71.4881	70.1032	70.8094	70.0166	71.2616	68.7893	69.5915	69.9664	70.293	71.3815	71.2372	71.8803	71.4704	71.7518	71.5317	72.0425	71.8794	70.5455	71.867	72.0879	72.0687	71.687	72.588	72.4915
2642.48	73.2222	72.2313	72.9732	73.6377	72.883	72.9909	73.0247	73.1397	72.4743	70.4677	71.7089	71.7292	71.3407	71.5207	72.0137	71.914	71.7638	71.9097	71.9682	71.7155	72.4815	71.3992	71.0772		70.4062	71.4488	70.0658	70.7796	69.9759	71.2202	68.7494	69.5516	69.9287	70.2496	71.343	71.2052	71.8456	71.4366	71.715	71.4965	72.0041	71.8416	70.5033	71.8378	72.0473	72.0338	71.6512	72.5514	72.4546
2644.41	73.1725	72.1819	72.9251	73.5851	72.8395	72.9493	72.9785	73.0977	72.4256	70.4206	71.6572	71.6852	71.2996	71.4799	71.9657	71.8614	71.7161	71.8657	71.9256	71.6713	72.4312	71.3566	71.0305		70.3569	71.4004	70.018	70.7363	69.9238	71.1681	68.7005	69.5045	69.8787	70.1938	71.2939	71.1585	71.8033	71.3966	71.6708	71.4448	71.9623	71.7997	70.4586	71.7931	71.9934	71.9871	71.6026	72.5022	72.4084
2646.34	73.1275	72.1338	72.8826	73.5334	72.787	72.8996	72.9343	73.0524	72.3806	70.3711	71.6104	71.6426	71.2581	71.4425	71.9282	71.8178	71.6675	71.8191	71.8762	71.6234	72.3858	71.3143	70.984		70.3089	71.3502	69.9712	70.6838	69.8728	71.1211	68.6463	69.4515	69.8233	70.1466	71.2483	71.112	71.758	71.3531	71.6243	71.4013	71.9221	71.7587	70.4168	71.7523	71.9457	71.9382	71.5548	72.4473	72.3598
2648.26	73.0717	72.0881	72.84	73.4831	72.7311	72.8479	72.8774	73.0004	72.3282	70.3146	71.5626	71.5941	71.2	71.3869	71.8685	71.7731	71.6147	71.7709	71.823	71.5684	72.335	71.2677	70.9252		70.2527	71.2945	69.9179	70.6308	69.8187	71.0704	68.5928	69.3925	69.767	70.0957	71.1947	71.0591	71.7028	71.3053	71.5716	71.3488	71.8701	71.7078	70.3664	71.7021	71.8982	71.8907	71.5038	72.3958	72.3071
2650.19	73.0142	72.0356	72.7874	73.4345	72.6796	72.7996	72.8222	72.948	72.2679	70.2561	71.5106	71.5452	71.1456	71.3312	71.8215	71.7241	71.557	71.715	71.7742	71.5154	72.2814	71.217	70.8716		70.1968	71.2512	69.8607	70.5821	69.7677	71.0251	68.5395	69.3394	69.7078	70.0373	71.1374	71.0094	71.656	71.2601	71.5236	71.2976	71.8196	71.6536	70.3174	71.648	71.8458	71.8391	71.4546	72.3407	72.2507
2652.12	72.9557	71.9755	72.717	73.3709	72.6224	72.7385	72.7736	72.8845	72.2012	70.1906	71.449	71.48	71.0856	71.2716	71.7668	71.6623	71.491	71.6486	71.7146	71.4563	72.2168	71.1513	70.8174		70.1341	71.2012	69.7916	70.5148	69.704	70.968	68.4735	69.2772	69.6432	69.9735	71.073	70.957	71.5989	71.2011	71.4635	71.2387	71.7591	71.5906	70.2546	71.5828	71.7807	71.7698	71.393	72.2808	72.1841
2654.05	72.8957	71.9161	72.6493	73.3017	72.5537	72.6729	72.7187	72.8215	72.1361	70.1205	71.3899	71.4172	71.0239	71.206	71.6916	71.5994	71.4283	71.5882	71.645	71.3864	72.1555	71.0863	70.7558		70.07	71.1366	69.7271	70.435	69.6364	70.9002	68.4049	69.2068	69.5809	69.9159	71.0059	70.9001	71.538	71.1411	71.4046	71.1776	71.6988	71.5295	70.1838	71.5263	71.7209	71.7015	71.3278	72.2212	72.1204
2655.98	72.8224	71.8463	72.5754	73.2333	72.4707	72.5989	72.6484	72.7529	72.0712	70.0438	71.321	71.3479	70.9525	71.1268	71.6214	71.5315	71.3612	71.5149	71.5717	71.3105	72.0852	71.0157	70.6832		69.9949	71.0593	69.6557	70.36	69.5647	70.8226	68.3271	69.1286	69.5046	69.8453	70.933	70.8268	71.4641	71.0683	71.3371	71.1073	71.628	71.46	70.1031	71.455	71.6482	71.6305	71.2514	72.1523	72.0487
2657.91	72.7487	71.7715	72.5	73.1615	72.3934	72.5254	72.5679	72.6783	71.9993	69.963	71.2496	71.2758	70.8834	71.05	71.5539	71.4579	71.2884	71.4388	71.4987	71.2378	72.0131	70.9474	70.6092		69.9197	70.9897	69.5778	70.2908	69.4925	70.7496	68.2464	69.0512	69.4222	69.7594	70.8602	70.7526	71.3898	71.0003	71.2639	71.03	71.5554	71.3899	70.0306	71.3856	71.5706	71.5625	71.1808	72.0758	71.9761
2659.84	72.661	71.6839	72.42	73.0787	72.3234	72.4433	72.48	72.593	71.9177	69.879	71.1679	71.1963	70.806	70.9744	71.4664	71.3749	71.2059	71.3602	71.415	71.1585	71.9343	70.869	70.5278		69.8334	70.9118	69.4972	70.213	69.4079	70.6642	68.1591	68.9686	69.3383	69.6715	70.7787	70.6733	71.3096	70.9223	71.1803	70.9452	71.4742	71.3073	69.951	71.3139	71.4923	71.4818	71.1013	71.9865	71.8935
2661.77	72.5763	71.5962	72.3346	72.9962	72.2523	72.3647	72.3998	72.508	71.8345	69.796	71.0865	71.116	70.7214	70.8995	71.3893	71.2925	71.1225	71.2831	71.3321	71.075	71.8566	70.7932	70.45		69.7446	70.8296	69.4185	70.131	69.3223	70.5798	68.0739	68.8881	69.2519	69.597	70.693	70.5928	71.2336	70.844	71.1027	70.8701	71.3988	71.2299	69.868	71.2353	71.4163	71.3994	71.022	71.904	71.8135
2663.69	72.4897	71.5092	72.2423	72.9102	72.1517	72.276	72.3095	72.4196	71.7418	69.7048	70.9989	71.0294	70.629	70.8179	71.3039	71.21	71.0368	71.1968	71.2458	70.991	71.7716	70.7009	70.3597		69.6508	70.7342	69.3245	70.0373	69.2297	70.4944	67.9825	68.7966	69.1569	69.5083	70.5983	70.5079	71.1493	70.7618	71.0148	70.78	71.3138	71.1432	69.7771	71.1479	71.3286	71.3148	70.933	71.8191	71.7275
2665.62	72.4013	71.4246	72.1624	72.8193	72.0484	72.187	72.2202	72.3333	71.6544	69.6092	70.9123	70.9426	70.5436	70.7276	71.2162	71.1291	70.9547	71.1077	71.1571	70.9037	71.6867	70.6147	70.2721		69.5658	70.6467	69.2309	69.9463	69.1381	70.4092	67.888	68.702	69.0644	69.4116	70.5031	70.4276	71.0705	70.6807	70.9294	70.6869	71.2303	71.0604	69.6978	71.0644	71.245	71.2267	70.8489	71.7329	71.6399
2667.55	72.2997	71.3326	72.0704	72.721	71.9552	72.0957	72.1304	72.2377	71.561	69.5027	70.8128	70.8488	70.4458	70.6326	71.1293	71.0391	70.863	71.0182	71.0654	70.8072	71.5948	70.5241	70.1796		69.4707	70.5649	69.1354	69.8459	69.0353	70.3123	67.7861	68.5998	68.963	69.3162	70.4105	70.3356	70.978	70.5834	70.8349	70.594	71.1384	70.9699	69.6054	70.9748	71.1539	71.1346	70.7587	71.6404	71.5484
2669.48	72.2027	71.2294	71.9741	72.6269	71.8638	71.9993	72.0306	72.1369	71.4583	69.3999	70.7158	70.757	70.3457	70.5429	71.0321	70.9419	70.7636	70.9164	70.9725	70.7106	71.5009	70.4298	70.0821		69.372	70.4726	69.0358	69.7453	68.9337	70.2052	67.6837	68.4977	68.8593	69.2209	70.3199	70.2448	70.8785	70.4789	70.7383	70.5002	71.0485	70.8811	69.4994	70.88	71.0588	71.0375	70.6662	71.5449	71.4555
2671.41	72.0972	71.1219	71.8668	72.5169	71.7511	71.8895	71.9147	72.0239	71.3448	69.2864	70.6072	70.6469	70.2405	70.4277	70.9208	70.8311	70.655	70.7993	70.8642	70.6049	71.3898	70.3243	69.9677		69.2613	70.3603	68.9261	69.6357	68.8262	70.0901	67.5656	68.3883	68.7457	69.1044	70.208	70.1355	70.7672	70.3691	70.6312	70.3866	70.9436	70.7753	69.3822	70.7751	70.9494	70.9311	70.5602	71.4383	71.3449
2673.34	71.9911	71.0175	71.7499	72.4068	71.6434	71.7792	71.7982	71.913	71.2359	69.1705	70.4963	70.5377	70.136	70.3104	70.8166	70.7232	70.5448	70.6895	70.75	70.4935	71.2813	70.2222	69.8524		69.1472	70.2534	68.813	69.5183	68.7124	69.9817	67.4432	68.2719	68.6271	68.9867	70.0891	70.0236	70.6582	70.2676	70.5236	70.2762	70.8369	70.6664	69.2703	70.6654	70.8372	70.8247	70.4495	71.3286	71.2338
2675.27	71.8683	70.8917	71.6219	72.2859	71.529	71.6638	71.6812	71.7934	71.121	69.0472	70.3835	70.4239	70.0137	70.1906	70.6897	70.6097	70.4247	70.5716	70.6268	70.3703	71.1635	70.1062	69.7303		69.0228	70.1361	68.6852	69.392	68.5832	69.8643	67.3149	68.1427	68.4972	68.8706	69.9635	69.9008	70.5376	70.1522	70.4019	70.1561	70.72	70.5477	69.1469	70.5469	70.7145	70.71	70.325	71.2113	71.1174
2677.2	71.7448	70.7603	71.5061	72.16	71.4074	71.5432	71.5673	71.6659	70.9941	68.9105	70.2591	70.2997	69.8855	70.0657	70.5682	70.4853	70.3008	70.4443	70.5038	70.2447	71.0435	69.9904	69.6079		68.8921	70.0084	68.5563	69.2683	68.4524	69.7388	67.1816	68.0107	68.3665	68.7446	69.8351	69.7792	70.4153	70.0339	70.2802	70.0338	70.6001	70.4258	69.0236	70.4292	70.5974	70.5834	70.2077	71.087	70.9959
2679.13	71.6245	70.6378	71.3869	72.0326	71.2725	71.4135	71.4425	71.5396	70.8614	68.7741	70.1303	70.1705	69.7597	69.9361	70.4571	70.3563	70.1794	70.3205	70.3789	70.1183	70.9182	69.8649	69.4834		68.7607	69.8814	68.4297	69.1361	68.3234	69.6077	67.0432	67.8749	68.2354	68.6124	69.706	69.6597	70.2923	69.9128	70.1574	69.912	70.4731	70.3012	68.8979	70.3019	70.4767	70.4604	70.0921	70.9683	70.8678
2681.05	71.5185	70.526	71.268	71.9136	71.1466	71.291	71.3231	71.4287	70.7414	68.6522	70.0113	70.056	69.6495	69.824	70.3356	70.2422	70.0702	70.2069	70.269	70.0049	70.7986	69.7442	69.3674		68.6419	69.7669	68.3117	69.0221	68.2	69.4914	66.9147	67.7477	68.1138	68.4964	69.5926	69.5403	70.1788	69.7981	70.0377	69.7917	70.3586	70.1903	68.7824	70.1875	70.3664	70.3506	69.9855	70.8586	70.7535
2682.98	71.3965	70.4046	71.1479	71.7899	71.0325	71.1772	71.2097	71.3128	70.6274	68.5278	69.8902	69.9326	69.5295	69.7023	70.2101	70.1355	69.9581	70.0837	70.156	69.8908	70.6738	69.6214	69.2482		68.519	69.6428	68.1837	68.9058	68.0704	69.3718	66.7891	67.6219	67.9927	68.3779	69.4742	69.4086	70.0532	69.6695	69.9148	69.6683	70.2371	70.0695	68.6561	70.0767	70.2499	70.2362	69.866	70.7325	70.6388
2684.91	71.2662	70.2788	71.0223	71.6625	70.9143	71.0484	71.087	71.1838	70.5032	68.3914	69.7658	69.8039	69.3973	69.5705	70.0909	70.02	69.8286	69.9544	70.0269	69.7591	70.5493	69.5046	69.1184		68.3861	69.5093	68.0505	68.7735	67.9381	69.236	66.6535	67.4896	67.8556	68.241	69.3378	69.2795	69.9183	69.5351	69.7886	69.5426	70.1105	69.9387	68.5203	69.9492	70.1218	70.106	69.7341	70.6029	70.5122
2686.84	71.1294	70.1431	70.8799	71.5317	70.7719	70.9124	70.9426	71.0493	70.3685	68.2476	69.627	69.6635	69.2534	69.4391	69.9469	69.8783	69.6833	69.8213	69.8866	69.6149	70.4132	69.3643	68.9756		68.2401	69.3673	67.9084	68.6191	67.7951	69.0877	66.5003	67.3413	67.7047	68.0921	69.1943	69.1512	69.7779	69.3961	69.6526	69.4039	69.9735	69.7995	68.3778	69.8025	69.9852	69.9667	69.5981	70.4699	70.3745
2688.77	70.9854	69.9991	70.747	71.3928	70.6251	70.7758	70.7946	70.9121	70.227	68.0997	69.483	69.518	69.1093	69.2958	69.8118	69.7246	69.5436	69.6762	69.745	69.4748	70.2742	69.2221	68.8328		68.0917	69.2258	67.7658	68.4632	67.6525	68.9444	66.3513	67.1988	67.5528	67.957	69.0539	69.0141	69.6428	69.2602	69.516	69.2653	69.8337	69.6621	68.2309	69.6594	69.8525	69.8299	69.463	70.3355	70.2386
2690.7	70.8276	69.8494	70.6118	71.2476	70.477	70.6227	70.6446	70.7619	70.0768	67.9427	69.3289	69.3627	68.9558	69.1386	69.6665	69.5745	69.4013	69.5244	69.597	69.3255	70.1278	69.0815	68.6804		67.9327	69.0755	67.6103	68.3031	67.4965	68.7941	66.1943	67.0436	67.3954	67.8103	68.9072	68.8593	69.4932	69.1127	69.3654	69.1182	69.6868	69.5129	68.0706	69.5221	69.7077	69.6838	69.3145	70.186	70.0963
2692.63	70.6848	69.7021	70.4587	71.0891	70.323	70.4709	70.4943	70.6079	69.9283	67.7865	69.1771	69.2134	68.8038	68.9903	69.5142	69.4329	69.2528	69.3766	69.4437	69.1719	69.9794	68.9405	68.5305		67.7725	68.929	67.4493	68.1416	67.3338	68.6385	66.0299	66.879	67.2369	67.6511	68.751	68.7107	69.3394	68.962	69.2055	68.9576	69.5412	69.3691	67.9173	69.3844	69.5542	69.541	69.1689	70.0301	69.9484
2694.56	70.5321	69.5378	70.2911	70.9132	70.1564	70.3153	70.3458	70.4444	69.7651	67.6174	69.0176	69.0564	68.6466	68.834	69.3672	69.277	69.0923	69.2167	69.2815	69.0113	69.8173	68.7757	68.3685		67.6085	68.7674	67.2814	67.978	67.1624	68.4746	65.8545	66.7057	67.0682	67.4848	68.5867	68.5521	69.1757	68.8009	69.042	68.7917	69.381	69.2053	67.7568	69.2239	69.3972	69.383	69.0154	69.8699	69.7855
2696.48	70.3725	69.3714	70.1281	70.7494	69.9901	70.1551	70.1956	70.2811	69.5939	67.4401	68.8546	68.8914	68.4794	68.6687	69.1996	69.1064	68.9298	69.0497	69.1205	68.8497	69.6622	68.6109	68.1976		67.4409	68.6035	67.1136	67.8237	66.9924	68.3063	65.6743	66.5293	66.8933	67.3196	68.4191	68.3848	69.0096	68.643	68.8822	68.626	69.2152	69.0403	67.5911	69.0505	69.2385	69.2207	68.8559	69.714	69.6207
2698.41	70.1948	69.2025	69.9637	70.58	69.8225	69.9874	70.0232	70.1159	69.42	67.2584	68.6819	68.7228	68.3042	68.4982	69.0186	68.9281	68.7591	68.879	68.9549	68.6753	69.4967	68.4429	68.0232		67.2651	68.4243	66.9373	67.6577	66.8174	68.1334	65.4881	66.349	66.7133	67.1406	68.2487	68.2113	68.8389	68.4747	68.7088	68.449	69.0443	68.8732	67.4136	68.8805	69.0684	69.0571	68.6869	69.5493	69.4551
2700.34	70.019	69.0388	69.7936	70.4178	69.6579	69.8234	69.846	69.9468	69.2558	67.0853	68.5098	68.5549	68.1374	68.3291	68.8614	68.7582	68.5895	68.7115	68.7875	68.5046	69.3315	68.2773	67.8538		67.0877	68.2554	66.7608	67.4745	66.6405	67.9609	65.3051	66.1723	66.5367	66.9638	68.0778	68.0467	68.6722	68.3003	68.5417	68.2858	68.878	68.706	67.2303	68.7159	68.9053	68.8971	68.5217	69.3809	69.2959
2702.27	69.842	68.8604	69.6144	70.2529	69.483	69.6505	69.6709	69.7696	69.0814	66.9082	68.3275	68.384	67.9617	68.1495	68.681	68.5908	68.4179	68.5334	68.6101	68.3296	69.1579	68.1106	67.6733		66.8979	68.0877	66.5744	67.2874	66.4509	67.7815	65.1189	65.9902	66.3488	66.7876	67.8926	67.8688	68.4951	68.1194	68.3675	68.1178	68.6997	68.5278	67.0366	68.5378	68.7284	68.7278	68.3545	69.1995	69.1243
2704.2	69.6694	68.6771	69.4338	70.0746	69.3027	69.4689	69.4894	69.5955	68.903	66.7191	68.1479	68.2086	67.7813	67.9712	68.4994	68.4221	68.245	68.352	68.4298	68.1481	68.9809	67.9367	67.4937		66.7131	67.9047	66.3857	67.106	66.2612	67.6015	64.9263	65.8038	66.158	66.6081	67.7109	67.6872	68.3182	67.9419	68.1864	67.9324	68.5195	68.3473	66.8503	68.3612	68.5491	68.5573	68.1839	69.0213	68.9464
2706.13	69.4881	68.4842	69.2529	69.8839	69.1117	69.286	69.3055	69.4118	68.7124	66.5171	67.9577	68.0181	67.593	67.7782	68.3173	68.2281	68.0587	68.1642	68.2413	67.9605	68.7914	67.748	67.3037		66.5204	67.7133	66.1872	66.9024	66.0668	67.4053	64.7241	65.6025	65.9611	66.4113	67.5225	67.4964	68.1295	67.7515	67.997	67.7428	68.3327	68.1576	66.6611	68.1703	68.3647	68.3714	67.9959	68.8298	68.7588
2708.06	69.299	68.2951	69.0673	69.6964	68.9192	69.1047	69.1175	69.221	68.5148	66.314	67.7667	67.8266	67.4068	67.5825	68.1221	68.0211	67.8663	67.9736	68.0516	67.7708	68.6012	67.5593	67.1116		66.3206	67.5229	65.9922	66.7038	65.8687	67.2069	64.5176	65.3963	65.7585	66.2136	67.3327	67.303	67.9343	67.5596	67.8029	67.5491	68.1477	67.9696	66.4682	67.9791	68.1763	68.1815	67.8078	68.642	68.5703
2709.99	69.0993	68.0936	68.8675	69.5033	68.7199	68.9075	68.9225	69.0237	68.3129	66.1097	67.5689	67.629	67.2012	67.3861	67.9243	67.8215	67.6687	67.7768	67.8533	67.5681	68.4028	67.3616	66.9103		66.114	67.3154	65.7905	66.5026	65.6608	67.0045	64.3048	65.1896	65.5504	66.0173	67.1356	67.1054	67.7327	67.3633	67.6036	67.3362	67.9523	67.7737	66.2661	67.7895	67.9808	67.9842	67.616	68.4525	68.3759
2711.92	68.9029	67.893	68.6728	69.3107	68.5205	68.7072	68.7299	68.8277	68.1146	65.904	67.3717	67.4306	66.9972	67.1901	67.7371	67.6343	67.4727	67.5799	67.6568	67.3684	68.2057	67.173	66.7127		65.9103	67.1196	65.5807	66.2961	65.4563	66.8008	64.0917	64.9843	65.3416	65.8207	66.9375	66.9116	67.5382	67.1693	67.4119	67.1357	67.7538	67.5788	66.0665	67.5983	67.7869	67.7933	67.4249	68.2582	68.1768
2713.84	68.6947	67.6889	68.4631	69.1088	68.3118	68.4964	68.5213	68.6172	67.9093	65.6871	67.1649	67.218	66.7911	66.9767	67.5211	67.4308	67.2678	67.3718	67.4519	67.1632	67.9926	66.968	66.4956		65.6913	66.9158	65.3638	66.0742	65.2342	66.5812	63.8613	64.7578	65.1169	65.6007	66.728	66.7045	67.3265	66.9589	67.201	66.9307	67.5425	67.3719	65.8445	67.3835	67.579	67.5956	67.2203	68.0447	67.9691
2715.77	68.4878	67.4831	68.2531	68.8933	68.0964	68.2913	68.3099	68.4109	67.7025	65.464	66.9499	67.0063	66.5785	66.7724	67.3113	67.2141	67.0609	67.1594	67.2427	66.9507	67.7807	66.7572	66.2777		65.4698	66.7023	65.1455	65.8596	65.0098	66.3611	63.6311	64.5279	64.8922	65.3782	66.5136	66.4974	67.1065	66.744	66.9817	66.7191	67.3337	67.1635	65.6193	67.1651	67.3713	67.3858	67.0131	67.8294	67.7638
2717.7	68.2703	67.2556	68.0312	68.6711	67.878	68.0801	68.0962	68.1974	67.4877	65.2321	66.7197	66.788	66.353	66.5571	67.0997	66.9919	66.8419	66.9343	67.0229	66.7311	67.5609	66.542	66.0585		65.241	66.4721	64.9197	65.6361	64.7831	66.1395	63.3967	64.2968	64.6618	65.1588	66.2888	66.2763	66.8808	66.5192	66.7601	66.4988	67.1108	66.941	65.3877	66.947	67.1524	67.1673	66.8003	67.612	67.5498
2719.63	68.0473	67.0239	67.8076	68.4472	67.658	67.8594	67.8825	67.9739	67.2585	64.9892	66.4941	66.5611	66.1284	66.3256	66.8683	66.7665	66.6197	66.7044	66.794	66.5031	67.3377	66.3288	65.8311		65.0082	66.2431	64.6894	65.3995	64.5526	65.9144	63.1528	64.0608	64.4224	64.9285	66.0558	66.0476	66.6599	66.2951	66.5389	66.2793	66.8844	66.715	65.1579	66.7311	66.922	66.9488	66.5775	67.3885	67.3275
2721.56	67.8117	66.7908	67.5698	68.2095	67.4216	67.6265	67.6537	67.7384	67.0221	64.7391	66.2537	66.3231	65.8901	66.0844	66.6308	66.5291	66.3893	66.4635	66.5555	66.2624	67.1029	66.0949	65.589		64.7666	66.0067	64.4416	65.1554	64.3084	65.6709	62.8965	63.8109	64.1732	64.6836	65.814	65.809	66.4264	66.068	66.3008	66.0426	66.6512	66.4749	64.9233	66.4969	66.6859	66.7117	66.3438	67.1501	67.0874
2723.49	67.5781	66.5506	67.3252	67.9727	67.1839	67.3906	67.422	67.5066	66.7832	64.4927	66.0163	66.0921	65.6515	65.8508	66.3977	66.2935	66.1531	66.2306	66.3222	66.0222	66.8713	65.861	65.3546		64.5215	65.7744	64.1937	64.9073	64.0608	65.4296	62.6485	63.5672	63.9287	64.4466	65.5771	65.5766	66.187	65.8371	66.0619	65.8028	66.4179	66.2382	64.6833	66.2499	66.4554	66.4751	66.1163	66.9165	66.8536
2725.42	67.3398	66.3077	67.0856	67.7361	66.9414	67.1502	67.1821	67.2725	66.5352	64.2469	65.7766	65.843	65.4103	65.6103	66.1539	66.0515	65.9098	65.9975	66.0816	65.7813	66.6315	65.6225	65.1097		64.2637	65.5335	63.9405	64.6555	63.8049	65.1847	62.3929	63.3174	63.6816	64.2034	65.3348	65.3354	65.9407	65.5922	65.8182	65.5557	66.1757	66.0024	64.4304	66.0006	66.2178	66.2372	65.8821	66.6741	66.6173
2727.35	67.111	66.089	66.867	67.519	66.71	66.9293	66.956	67.0508	66.3141	64.013	65.5434	65.609	65.1805	65.3808	65.9286	65.8231	65.6832	65.7686	65.853	65.556	66.4018	65.3894	64.8752		64.0227	65.3048	63.7046	64.4285	63.5677	64.9503	62.1453	63.0768	63.4411	63.9654	65.1078	65.1112	65.7095	65.3638	65.5915	65.3265	65.9465	65.7788	64.1888	65.7826	65.9904	66.0229	65.6612	66.4502	66.3916
2729.27	66.8694	65.8597	66.6342	67.2895	66.4694	66.7023	66.7226	66.818	66.0827	63.7636	65.2989	65.3738	64.9388	65.1366	65.6937	65.5908	65.4455	65.5326	65.6176	65.3194	66.1645	65.1517	64.6326		63.773	65.069	63.4624	64.182	63.3192	64.7056	61.8893	62.8246	63.1921	63.724	64.8705	64.8778	65.4707	65.125	65.3577	65.088	65.7092	65.5404	63.9345	65.5498	65.758	65.7946	65.4259	66.2113	66.1521
2731.2	66.6263	65.6106	66.385	67.0489	66.217	66.4617	66.4734	66.5729	65.8261	63.5	65.0483	65.1292	64.6844	64.8793	65.4373	65.3446	65.1992	65.2829	65.3719	65.0707	65.9216	64.9082	64.3783		63.5117	64.8174	63.2096	63.908	63.0573	64.4539	61.6199	62.559	62.9298	63.4751	64.6169	64.6317	65.2249	64.8714	65.1142	64.8393	65.4634	65.2906	63.6761	65.2994	65.5144	65.5487	65.178	65.9569	65.9043
2733.13	66.3698	65.3388	66.129	66.7898	65.9569	66.2073	66.2175	66.3166	65.5581	63.2268	64.7841	64.8646	64.4176	64.6208	65.1866	65.0784	64.9446	65.0153	65.1158	64.8125	65.6618	64.6539	64.1161		63.2433	64.5495	62.9382	63.6354	62.7834	64.1859	61.3378	62.2824	62.6546	63.2083	64.3505	64.3637	64.9627	64.606	64.8464	64.5691	65.1976	65.0199	63.4028	65.0354	65.2573	65.2903	64.9222	65.6907	65.6462
2735.06	66.1075	65.0683	65.8656	66.5189	65.7013	65.9454	65.9565	66.0566	65.29	62.9509	64.5139	64.6018	64.1528	64.3598	64.9235	64.8046	64.6824	64.7479	64.8522	64.5428	65.3959	64.3907	63.8475		62.9726	64.2836	62.6601	63.3676	62.505	63.9088	61.0507	62.0017	62.3733	62.9348	64.0836	64.092	64.7012	64.3461	64.574	64.2977	64.9315	64.7511	63.1267	64.7678	64.9944	65.0269	64.6591	65.4297	65.3788
2736.99	65.8328	64.7987	65.5842	66.2496	65.4346	65.6694	65.6805	65.7883	65.0216	62.6706	64.2351	64.3301	63.8787	64.0863	64.6445	64.5309	64.4141	64.4791	64.5773	64.2675	65.1204	64.1221	63.566		62.6863	64.0131	62.3817	63.0903	62.221	63.6318	60.7605	61.7161	62.0879	62.6602	63.8105	63.8198	64.4287	64.076	64.3031	64.0211	64.6646	64.4853	62.8515	64.5018	64.7143	64.7556	64.3878	65.1572	65.1034
2738.92	65.5686	64.5238	65.31	65.9853	65.1687	65.4072	65.4239	65.5264	64.7567	62.3939	63.9654	64.0616	63.6124	63.828	64.3851	64.2674	64.1538	64.2175	64.3075	64.0001	64.8509	63.8654	63.2942		62.4092	63.7421	62.1072	62.8146	61.9442	63.3596	60.4782	61.4358	61.8103	62.3906	63.5403	63.5575	64.1574	63.8088	64.0397	63.7538	64.4	64.2235	62.5857	64.2299	64.4443	64.4953	64.1312	64.8857	64.8395
2740.85	65.2944	64.2499	65.0388	65.7142	64.8903	65.1419	65.163	65.2538	64.4798	62.1001	63.6844	63.7848	63.3312	63.551	64.1012	63.9899	63.8794	63.9412	64.0318	63.7225	64.5702	63.5878	63.0145		62.1226	63.4583	61.8143	62.5299	61.6565	63.0766	60.1809	61.1437	61.5242	62.1045	63.261	63.283	63.8799	63.5335	63.7631	63.4839	64.116	63.9404	62.2953	63.9467	64.1696	64.2242	63.8606	64.6097	64.5647
2742.78	65.0166	63.9763	64.7565	65.4411	64.6018	64.8646	64.8795	64.9714	64.1938	61.8052	63.4032	63.5001	63.0465	63.2649	63.8143	63.7014	63.5936	63.6537	63.751	63.4407	64.2876	63.3118	62.7287		61.8279	63.1731	61.5188	62.2299	61.3667	62.7891	59.8738	60.8454	61.2304	61.8147	62.9748	62.9961	63.6	63.2522	63.4817	63.2029	63.8342	63.6562	61.9933	63.6679	63.8948	63.9414	63.5809	64.3279	64.2831
2744.71	64.7162	63.6702	64.4477	65.1455	64.3009	64.5684	64.5871	64.676	63.8958	61.4966	63.1001	63.1989	62.7445	62.9645	63.5238	63.403	63.2931	63.3499	63.4532	63.1414	63.9857	63.0231	62.4256		61.5186	62.8738	61.2109	61.92	61.0523	62.4857	59.5528	60.5301	60.9149	61.5165	62.6728	62.6995	63.3039	62.9515	63.1847	62.9042	63.537	63.3621	61.6857	63.3745	63.6064	63.6463	63.2861	64.0235	63.9859
2746.63	64.4065	63.3594	64.1413	64.8352	63.9983	64.2692	64.2927	64.3743	63.5961	61.1829	62.7867	62.8972	62.4342	62.6573	63.2204	63.102	62.9881	63.0428	63.1506	62.8356	63.678	62.7241	62.1164		61.2065	62.5693	60.8969	61.6114	60.7315	62.1725	59.2254	60.2064	60.5902	61.2099	62.3671	62.4043	63.0014	62.649	62.8781	62.5983	63.2294	63.0607	61.376	63.0738	63.3075	63.3478	62.9877	63.7237	63.6822
2748.56	64.1076	63.0654	63.8418	64.5304	63.6906	63.976	63.995	64.0784	63.2905	60.8673	62.4763	62.5908	62.1298	62.3549	62.9254	62.8008	62.6894	62.7462	62.8524	62.5347	63.373	62.4263	61.8067		60.8897	62.2612	60.582	61.2841	60.4179	61.8662	58.9018	59.8912	60.2715	60.9022	62.0594	62.1032	62.6917	62.3461	62.5739	62.2802	62.9237	62.7525	61.0601	62.7691	63.0021	63.0523	62.6902	63.4211	63.3795
2750.49	63.8185	62.7741	63.5562	64.2393	63.3939	63.6887	63.7051	63.7938	62.9895	60.5573	62.1777	62.2917	61.83	62.0602	62.6386	62.5064	62.4031	62.4552	62.5597	62.2411	63.0805	62.1359	61.5079		60.5823	61.9736	60.2786	60.9713	60.1155	61.5702	58.5883	59.5901	59.9656	60.6014	61.7632	61.8058	62.3929	62.0503	62.2781	61.9673	62.6313	62.4517	60.7446	62.4716	62.709	62.7663	62.401	63.1267	63.0938
2752.42	63.5041	62.4651	63.2543	63.9413	63.091	63.3864	63.4024	63.4942	62.6853	60.2398	61.8648	61.9869	61.5158	61.7536	62.3239	62.1986	62.1054	62.1496	62.2537	61.9302	62.7773	61.8255	61.2019		60.2646	61.6606	59.9616	60.6688	59.7974	61.2531	58.2652	59.2677	59.6484	60.2937	61.4629	61.5041	62.0842	61.746	61.9696	61.6566	62.328	62.1478	60.4223	62.1676	62.401	62.4602	62.1051	62.8203	62.7925
2754.35	63.1887	62.1453	62.9425	63.6275	62.7792	63.0705	63.0838	63.1831	62.3732	59.9133	61.5448	61.6752	61.2001	61.4341	62.011	61.8796	61.7919	61.8354	61.9408	61.6101	62.4612	61.5054	60.8825		59.9322	61.3309	59.6348	60.3557	59.4703	60.9237	57.9305	58.9327	59.322	59.9734	61.1404	61.1932	61.7662	61.4306	61.6502	61.3415	62.0149	61.8358	60.1011	61.858	62.0894	62.1488	61.7961	62.5041	62.4724
2756.28	62.8751	61.8221	62.6153	63.3025	62.4609	62.7446	62.7608	62.8594	62.0437	59.5771	61.2178	61.344	60.8742	61.1086	61.6839	61.5556	61.4688	61.5103	61.6153	61.2863	62.1345	61.1869	60.5456		59.595	61.0008	59.2988	60.0112	59.1284	60.586	57.5806	58.5868	58.9773	59.6395	60.8049	60.8624	61.4387	61.1017	61.3208	61.0138	61.6885	61.5129	59.7638	61.5238	61.774	61.8248	61.4738	62.1808	62.1464
2758.21	62.5553	61.4952	62.2907	62.9842	62.1353	62.4233	62.443	62.536	61.7175	59.2396	60.8907	61.0108	60.5461	60.7842	61.3521	61.2356	61.1496	61.186	61.2919	60.9628	61.8134	60.8729	60.2155		59.2653	60.6794	58.9615	59.6692	58.7894	60.2529	57.2331	58.2464	58.6341	59.3111	60.4785	60.5366	61.1154	60.7793	60.9968	60.6913	61.3609	61.1886	59.4282	61.2012	61.4515	61.5054	61.1522	61.8618	61.8271
2760.14	62.2136	61.1559	61.9545	62.6547	61.7966	62.0973	62.1115	62.2074	61.3868	58.8926	60.5505	60.6781	60.2102	60.4423	61.0262	60.9053	60.8214	60.8542	60.9648	60.6321	61.4801	60.5389	59.8758		58.9196	60.3407	58.6126	59.3265	58.4446	59.9118	56.8788	57.9022	58.2874	58.9715	60.1473	60.1988	60.7752	60.4477	60.6634	60.3618	61.0238	60.851	59.0888	60.8761	61.1156	61.1801	60.8244	61.5304	61.498
2762.06	61.8736	60.8234	61.6193	62.3237	61.4582	61.7655	61.7825	61.8782	61.0543	58.5457	60.2076	60.3435	59.8692	60.0989	60.6929	60.5627	60.485	60.5182	60.6354	60.2974	61.1445	60.2076	59.5371		58.5691	59.995	58.2643	58.9783	58.0936	59.5733	56.5196	57.5521	57.9363	58.6246	59.8124	59.8604	60.4289	60.1085	60.3247	60.0169	60.6887	60.5149	58.746	60.5475	60.7844	60.8504	60.4964	61.1928	61.1655
2763.99	61.5272	60.4704	61.268	61.9765	61.1122	61.4267	61.4521	61.5336	60.702	58.1919	59.8519	59.9922	59.5108	59.7533	60.3458	60.2085	60.1425	60.1666	60.2872	59.9451	60.8004	59.8654	59.1844		58.206	59.6426	57.9092	58.6137	57.7315	59.2235	56.1451	57.1852	57.5781	58.273	59.4592	59.5166	60.0791	59.7573	59.973	59.6586	60.3413	60.1673	58.3811	60.1969	60.4362	60.5034	60.1509	60.8421	60.8207
2765.92	61.1773	60.118	60.9111	61.6288	60.7578	61.0884	61.1068	61.1842	60.354	57.8308	59.4988	59.6408	59.1574	59.4061	60.0025	59.8627	59.8001	59.8132	59.9384	59.5939	60.4529	59.526	58.8292		57.8425	59.2933	57.5523	58.2556	57.3676	58.8665	55.7708	56.8172	57.2165	57.926	59.1097	59.1702	59.7361	59.4152	59.6233	59.3109	59.9933	59.8159	58.0179	59.8434	60.0871	60.1515	59.8043	60.492	60.4711
2767.85	60.8227	59.7568	60.5468	61.2648	60.4002	60.7354	60.745	60.8253	59.9951	57.4529	59.1369	59.284	58.8008	59.0485	59.636	59.5115	59.4448	59.4586	59.5834	59.2368	60.09	59.1698	58.4624		57.473	58.9334	57.1768	57.8755	56.9954	58.4976	55.3872	56.4395	56.8433	57.5653	58.7499	58.8058	59.3751	59.0578	59.2625	58.9518	59.6295	59.4498	57.6448	59.49	59.7344	59.7935	59.4504	60.1319	60.1119
2769.78	60.46	59.3842	60.1877	60.8931	60.0404	60.3728	60.3846	60.4684	59.6308	57.0754	58.7656	58.9209	58.4342	58.6901	59.2733	59.1514	59.0833	59.094	59.2205	58.8708	59.7261	58.8057	58.0917		57.098	58.5695	56.801	57.4983	56.6206	58.1288	55.0035	56.0621	56.4649	57.1908	58.3768	58.4404	59.0102	58.6937	58.8993	58.5868	59.266	59.0883	57.2663	59.1327	59.3743	59.4358	59.0934	59.7723	59.7479
2771.71	60.0812	58.9982	59.8153	60.5136	59.656	59.9949	60.0071	60.0959	59.2488	56.6868	58.3775	58.5388	58.0508	58.3061	58.9032	58.7591	58.7039	58.7057	58.8353	58.4841	59.3469	58.4273	57.7036		56.7014	58.183	56.4125	57.1179	56.2254	57.7382	54.6036	55.6674	56.0691	56.7984	57.9909	58.0587	58.6301	58.315	58.5188	58.2029	58.8854	58.7087	56.8736	58.7427	58.9913	59.0573	58.7184	59.3901	59.3692
2773.64	59.7003	58.6176	59.4365	60.142	59.2771	59.6158	59.6311	59.7213	58.867	56.2924	57.998	58.1585	57.669	57.928	58.5215	58.3653	58.3276	58.329	58.4566	58.1027	58.9662	58.0583	57.3197		56.3062	57.7957	56.0218	56.7221	55.829	57.3421	54.2013	55.2674	55.6722	56.4096	57.6083	57.6774	58.2486	57.9342	58.1397	57.8209	58.5045	58.3337	56.4811	58.3597	58.6143	58.6825	58.3406	59.0079	58.9915
2775.57	59.3237	58.2442	59.0595	59.7748	58.9009	59.2485	59.2543	59.3534	58.49	55.9039	57.6229	57.7811	57.2914	57.5549	58.1548	57.9933	57.9607	57.9604	58.0864	57.7297	58.5877	57.6928	56.9397		55.9185	57.4198	55.6355	56.3344	55.444	56.9628	53.8032	54.8782	55.2814	56.0324	57.2328	57.306	57.8696	57.5571	57.76	57.4366	58.1277	57.9568	56.0942	57.9901	58.2537	58.3202	57.9775	58.6356	58.6188
2777.5	58.9533	57.8738	58.6951	59.4078	58.5247	58.888	58.8871	58.9902	58.1171	55.5267	57.2461	57.4076	56.9174	57.1728	57.7936	57.6369	57.5982	57.5917	57.7181	57.3595	58.2156	57.3254	56.5651		55.5364	57.0454	55.2519	55.9601	55.0638	56.5831	53.4122	54.4983	54.8979	55.6583	56.8599	56.9376	57.4946	57.1849	57.382	57.0547	57.7574	57.5832	55.7089	57.6235	57.8922	57.9526	57.6218	58.2755	58.2523
2779.42	58.5668	57.493	58.3066	59.0206	58.1369	58.5063	58.5077	58.6051	57.7315	55.1301	56.8502	57.0117	56.5232	56.7714	57.3955	57.256	57.2106	57.2024	57.3359	56.9748	57.8211	56.9336	56.1733		55.1338	56.6484	54.8503	55.5562	54.6588	56.1832	53.0026	54.0914	54.4979	55.2661	56.4679	56.5415	57.1059	56.79	56.9896	56.6609	57.3657	57.1913	55.3077	57.2316	57.5002	57.569	57.2371	57.8852	57.8678
2781.35	58.1749	57.1025	57.9154	58.6227	57.7472	58.1174	58.122	58.211	57.3427	54.7185	56.4533	56.6111	56.1282	56.3773	57.0028	56.8523	56.8193	56.8083	56.9455	56.5813	57.4297	56.5433	55.7751		54.7283	56.2489	54.4454	55.1394	54.2525	55.7766	52.5853	53.6798	54.0904	54.871	56.0727	56.1406	56.7131	56.3983	56.5985	56.2685	56.9675	56.7927	54.9075	56.8268	57.1066	57.1795	56.8442	57.4811	57.4766
2783.28	57.7662	56.688	57.5118	58.2169	57.3478	57.72	57.7284	57.8074	56.9424	54.2949	56.0424	56.1981	55.7246	55.9776	56.598	56.4327	56.4211	56.4021	56.5419	56.1708	57.0213	56.1403	55.3585		54.3126	55.8465	54.0272	54.724	53.8358	55.3598	52.1572	53.2576	53.6725	54.4577	55.6666	55.7326	56.3017	55.9938	56.1935	55.8602	56.5616	56.383	54.4934	56.4129	56.7062	56.7794	56.4462	57.0712	57.0761
2785.21	57.3542	56.2674	57.0923	57.8136	56.9406	57.3113	57.3171	57.4002	56.5313	53.871	55.6237	55.7886	55.3077	55.5682	56.1834	56.0212	56.0153	55.9858	56.1348	55.7593	56.6056	55.7318	54.938		53.8892	55.4398	53.6068	54.3049	53.4122	54.9471	51.7235	52.8289	53.2472	54.0389	55.2529	55.3173	55.886	55.589	55.7784	55.4498	56.1533	55.9706	54.0729	56.0065	56.3026	56.3782	56.0456	56.6657	56.67
2787.14	56.9236	55.841	56.6521	57.3887	56.5089	56.8852	56.8868	56.9776	56.1027	53.4335	55.1847	55.3629	54.8662	55.133	55.7585	55.6048	55.5904	55.5599	55.7082	55.3359	56.1819	55.3091	54.5041		53.443	55.0001	53.1662	53.8611	52.9661	54.5112	51.2727	52.3826	52.8056	53.6052	54.817	54.892	55.4556	55.1603	55.3478	55.0172	55.7221	55.5448	53.6321	55.5821	55.8744	55.9515	55.6178	56.2358	56.2415
2789.07	56.4944	55.4121	56.227	56.9663	56.0744	56.4723	56.4708	56.5632	55.6812	52.9976	54.7532	54.9358	54.4418	54.7089	55.3354	55.1841	55.1686	55.1379	55.2841	54.9102	55.7584	54.8933	54.0778		53.0009	54.5708	52.7287	53.4318	52.5299	54.0787	50.8248	51.9411	52.3676	53.1771	54.3871	54.4734	55.0268	54.735	54.9231	54.5819	55.2996	55.1235	53.1911	55.1663	55.4523	55.5352	55.1977	55.8138	55.8132
2791	56.0776	54.9823	55.8159	56.5465	55.6486	56.0587	56.0552	56.1513	55.2582	52.5673	54.3291	54.5144	54.025	54.2966	54.9148	54.7512	54.7525	54.7133	54.8643	54.4861	55.3348	54.4804	53.6569		52.5708	54.1564	52.2999	53.0064	52.1026	53.6525	50.3816	51.5025	51.9306	52.7525	53.9635	54.052	54.6032	54.3111	54.5018	54.1545	54.88	54.7043	52.7515	54.7419	55.0383	55.1144	54.7863	55.3895	55.3942
2792.93	55.6694	54.5687	55.4011	56.1238	55.2268	55.6368	55.6391	55.7327	54.8338	52.134	53.9084	54.0888	53.5977	53.8783	54.5038	54.3166	54.3363	54.2931	54.4394	54.0632	54.9146	54.0665	53.2327		52.1407	53.7327	51.8675	52.5684	51.6644	53.2207	49.9398	51.0674	51.4942	52.3243	53.5384	53.6303	54.1783	53.887	54.0793	53.7261	54.4578	54.2841	52.3208	54.3138	54.6183	54.6895	54.3753	54.9717	54.9787
2794.85	55.235	54.1348	54.9621	55.6813	54.7888	55.2005	55.207	55.2919	54.3928	51.6765	53.4579	53.6419	53.1488	53.4326	54.0652	53.8811	53.9001	53.8534	54.0013	53.6202	54.4733	53.6302	52.7825		51.6848	53.279	51.4148	52.1013	51.2057	52.7707	49.4804	50.6176	51.0438	51.878	53.1005	53.1891	53.7338	53.4442	53.6325	53.2804	54.0159	53.8434	51.8631	53.8722	54.1781	54.2547	53.9401	54.535	54.54
2796.78	54.7864	53.6836	54.5151	55.2368	54.3486	54.7625	54.7638	54.852	53.9496	51.221	53.0015	53.2022	52.6996	52.9791	53.616	53.4497	53.4589	53.4092	53.5628	53.1749	54.0333	53.1889	52.3257		51.227	52.8259	50.9567	51.6446	50.7496	52.3178	49.0127	50.1586	50.5863	51.4319	52.6524	52.739	53.2868	52.9991	53.1828	52.8345	53.57	53.3955	51.4014	53.4236	53.7379	53.8243	53.5009	54.0881	54.0951
2798.71	54.3353	53.234	54.071	54.7962	53.9008	54.3241	54.3188	54.411	53.5093	50.7731	52.549	52.7569	52.2517	52.5288	53.1779	53.006	53.0201	52.965	53.1223	52.7338	53.5849	52.7493	51.8714		50.7667	52.3812	50.4939	51.1829	50.2912	51.865	48.5444	49.6956	50.125	50.9881	52.204	52.2873	52.837	52.5525	52.7341	52.3887	53.1237	52.9453	50.9442	52.9707	53.2971	53.3912	53.0614	53.642	53.6508
2800.64	53.8971	52.7947	53.6338	54.36	53.4599	53.8948	53.8838	53.9804	53.0744	50.329	52.1059	52.3135	51.8103	52.0914	52.7376	52.5558	52.5852	52.5261	52.6877	52.2934	53.1429	52.314	51.43		50.3141	51.9303	50.0427	50.73	49.84	51.4194	48.0855	49.2411	49.669	50.5435	51.7674	51.8495	52.3934	52.1144	52.2938	51.948	52.6805	52.5035	50.4979	52.5347	52.8646	52.9531	52.6277	53.1971	53.2156
2802.57	53.4417	52.3378	53.1727	53.9017	53.0084	53.4482	53.4328	53.5314	52.625	49.8592	51.6448	51.8546	51.3559	51.6367	52.2766	52.0903	52.1339	52.0682	52.2328	51.8362	52.6855	51.8574	50.9697		49.8512	51.4648	49.5746	50.274	49.3756	50.9509	47.6063	48.7693	49.2032	50.0832	51.3075	51.3948	51.9347	51.6617	51.837	51.4828	52.2174	52.0421	50.0319	52.082	52.4089	52.495	52.1792	52.736	52.766
2804.5	52.9698	51.8703	52.7063	53.4406	52.551	52.9894	52.9695	53.0708	52.1616	49.3774	51.1774	51.3897	50.8873	51.1674	51.8184	51.6297	51.6765	51.606	51.7677	51.3734	52.2216	51.3981	50.4971		49.3786	51.0059	49.1023	49.8089	48.9009	50.4786	47.1258	48.2929	48.7286	49.6168	50.8453	50.932	51.4643	51.2006	51.3745	51.0109	51.7523	51.5779	49.5499	51.6155	51.9427	52.0406	51.7245	52.2846	52.3063
2806.43	52.487	51.3923	52.2251	52.967	52.0735	52.5169	52.4961	52.598	51.6739	48.8885	50.6934	50.9067	50.4005	50.6856	51.3411	51.1587	51.2055	51.1373	51.2927	50.8954	51.7447	50.9233	50.0147		48.8838	50.5271	48.6197	49.3075	48.4071	49.9933	46.6349	47.8052	48.2387	49.1353	50.3704	50.4523	50.9815	50.7192	50.8959	50.5366	51.2749	51.1035	49.0487	51.1392	51.4737	51.5686	51.253	51.8159	51.8297
2808.36	52.0112	50.9212	51.7403	52.4878	51.5979	52.0408	52.0251	52.1223	51.1844	48.4	50.2078	50.4259	49.9196	50.2084	50.8618	50.6791	50.7309	50.6593	50.8176	50.4133	51.2599	50.4462	49.5293		48.3889	50.0378	48.1298	48.8088	47.9113	49.5003	46.1346	47.3084	47.7487	48.6531	49.8907	49.9709	50.4997	50.2363	50.4111	50.0518	50.7913	50.6237	48.5594	50.6546	51.0005	51.0889	50.7816	51.3328	51.3501
2810.28	51.5335	50.437	51.2604	52.014	51.121	51.5658	51.5428	51.6467	50.7047	47.9108	49.7187	49.9427	49.4404	49.7335	50.387	50.193	50.2533	50.1748	50.3414	49.9341	50.7739	49.9674	49.0408		47.8944	49.5531	47.6362	48.3296	47.4202	49.0104	45.6299	46.8091	47.2578	48.1732	49.4071	49.4908	50.0153	49.754	49.9272	49.5618	50.3062	50.1338	48.0661	50.1697	50.5209	50.6102	50.3051	50.8581	50.8679
2812.21	51.0577	49.9534	50.7898	51.5405	50.6504	51.099	51.0713	51.1757	50.2351	47.4339	49.2404	49.4692	48.9655	49.2567	49.9103	49.7165	49.7897	49.7	49.8726	49.4614	50.2993	49.5004	48.562		47.408	49.0894	47.152	47.8394	46.9373	48.5322	45.1372	46.3267	46.7731	47.6948	48.929	49.0177	49.5392	49.2802	49.453	49.0893	49.8299	49.6536	47.5768	49.6989	50.0502	50.1395	49.8367	50.3793	50.394
2814.14	50.5743	49.4688	50.3011	51.0484	50.1572	50.6186	50.5843	50.6886	49.7505	46.9367	48.7465	48.981	48.4716	48.761	49.4218	49.2305	49.3071	49.2105	49.3843	48.9722	49.8063	49.0158	48.0699		46.9069	48.5944	46.6524	47.325	46.4365	48.0358	44.631	45.8261	46.2731	47.2009	48.442	48.5325	49.0477	48.7913	48.9612	48.5996	49.3362	49.1582	47.0782	49.2087	49.5673	49.6566	49.3578	49.8801	49.9081
2816.07	50.0826	48.9721	49.7991	50.5535	49.6596	50.1317	50.0914	50.2039	49.2611	46.4296	48.2447	48.4806	47.9723	48.2678	48.9332	48.7363	48.817	48.7182	48.8966	48.4838	49.3091	48.5285	47.5769		46.4039	48.084	46.1477	46.8243	45.929	47.5338	44.1202	45.3188	45.7672	46.7083	47.95	48.0423	48.551	48.2963	48.4674	48.0972	48.841	48.6635	46.5785	48.7141	49.0735	49.1736	48.877	49.388	49.4223
2818	49.5682	48.4555	49.2969	50.0547	49.1555	49.635	49.6009	49.704	48.7567	45.9157	47.7338	47.966	47.4642	47.7642	48.4236	48.2232	48.3146	48.2161	48.3963	47.9813	48.8019	48.0287	47.0693		45.8868	47.5632	45.6321	46.3146	45.4132	47.0224	43.5966	44.8006	45.2508	46.2032	47.4405	47.5323	48.0389	47.7886	47.9566	47.5856	48.3337	48.1586	46.0614	48.2089	48.5662	48.6745	48.3815	48.8854	48.9211
2819.93	49.0629	47.9446	48.801	49.5564	48.6554	49.1343	49.1076	49.2038	48.2463	45.4039	47.2279	47.4572	46.9606	47.2556	47.924	47.7083	47.8124	47.7117	47.8897	47.4704	48.2972	47.526	46.5572		45.367	47.0522	45.1185	45.7978	44.9003	46.5087	43.0726	44.2797	44.7358	45.6951	46.9312	47.0203	47.5313	47.2827	47.4439	47.0772	47.827	47.6593	45.5403	47.7019	48.0672	48.1695	47.8827	48.3825	48.4145
2821.86	48.5489	47.4252	48.2827	49.0396	48.1361	48.6244	48.5979	48.6948	47.7212	44.8791	46.7098	46.9368	46.441	46.7364	47.411	47.1926	47.3023	47.1946	47.3755	46.9552	47.7755	47.0152	46.0338		44.8382	46.5337	44.5925	45.2811	44.3725	45.9805	42.5423	43.7528	44.2124	45.1769	46.4163	46.5045	47.0139	46.7683	46.9266	46.5537	47.3041	47.1459	45.0133	47.1854	47.5575	47.6559	47.3732	47.8687	47.8987
2823.79	48.0282	46.9101	47.759	48.523	47.6269	48.122	48.0787	48.182	47.2059	44.3561	46.1899	46.4188	45.9264	46.2261	46.8933	46.6849	46.7954	46.6801	46.8625	46.4434	47.2581	46.5162	45.5118		44.3137	46.0137	44.0703	44.759	43.847	45.4594	42.0146	43.2319	43.6883	44.6621	45.9004	45.9884	46.498	46.251	46.4122	46.036	46.7877	46.6321	44.4832	46.6696	47.0467	47.1509	46.8641	47.3469	47.3837
2825.72	47.5005	46.3894	47.2332	48.0009	47.1081	47.6122	47.5586	47.6607	46.6958	43.8264	45.659	45.8978	45.4053	45.7078	46.3754	46.162	46.2809	46.1617	46.3449	45.9227	46.7337	46.0031	44.9818		43.7776	45.4916	43.5401	44.2159	43.3203	44.9315	41.4763	42.6967	43.158	44.137	45.3752	45.4646	45.9705	45.7287	45.8875	45.5155	46.2616	46.1026	43.9501	46.1357	46.5245	46.6322	46.3434	46.8204	46.8599
2827.64	46.9726	45.8698	46.7059	47.4767	46.5807	47.0907	47.0476	47.1426	46.1804	43.2957	45.1274	45.3711	44.8729	45.1757	45.8482	45.6327	45.7608	45.6367	45.8235	45.3961	46.2109	45.4793	44.452		43.2418	44.9632	43.0042	43.6808	42.7869	44.3988	40.9378	42.1573	42.6209	43.6068	44.85	44.9426	45.4389	45.2084	45.3644	44.9886	45.7324	45.578	43.4285	45.6018	46.0014	46.1113	45.8253	46.2943	46.3364
2829.57	46.4359	45.3278	46.1656	46.9333	46.0462	46.5557	46.5139	46.6079	45.6334	42.7541	44.585	44.8306	44.3279	44.6312	45.3059	45.0903	45.2268	45.0918	45.285	44.8561	45.6722	44.942	43.9083		42.6961	44.4205	42.4575	43.1372	42.2381	43.8521	40.3865	41.6111	42.0714	43.0696	44.3156	44.4061	44.9003	44.6697	44.8234	44.4422	45.192	45.0385	42.8844	45.0681	45.4592	45.5798	45.2962	45.7587	45.7944
2831.5	45.8964	44.7843	45.6224	46.3859	45.5045	46.0181	45.9736	46.069	45.0839	42.2058	44.0395	44.2838	43.7871	44.0866	44.7668	44.5435	44.6852	44.5504	44.7453	44.3144	45.1261	44.4	43.366		42.1516	43.877	41.9094	42.5767	41.689	43.3041	39.8322	41.0594	41.5214	42.5289	43.7757	43.8603	44.356	44.1258	44.2737	43.8904	44.648	44.4879	42.3246	44.5323	44.9204	45.0391	44.7601	45.219	45.2524
2833.43	45.3401	44.2212	45.0679	45.8411	44.9425	45.464	45.4273	45.5199	44.5298	41.6433	43.4826	43.7237	43.232	43.5321	44.2079	43.9847	44.1321	43.9964	44.1935	43.7598	44.5669	43.8491	42.8057		41.5921	43.318	41.3475	42.0035	41.1268	42.7445	39.2663	40.4993	40.965	41.9705	43.2152	43.3039	43.798	43.5724	43.7162	43.3271	44.0916	43.9303	41.7596	43.9733	44.3642	44.4869	44.2083	44.6636	44.7007
2835.36	44.7824	43.6689	44.5177	45.2953	44.3885	44.9111	44.8763	44.9654	43.9752	41.0822	42.921	43.1662	42.6726	42.9794	43.6504	43.4275	43.5781	43.4416	43.6383	43.2026	44.0059	43.301	42.2444		41.0249	42.7544	40.7871	41.4465	40.5632	42.1797	38.6994	39.9365	40.4073	41.411	42.6582	42.7474	43.2404	43.0152	43.1605	42.7719	43.5339	43.3743	41.1978	43.4066	43.8116	43.931	43.6603	44.1005	44.1477
2837.29	44.2183	43.1047	43.9472	44.7245	43.8271	44.3529	44.3065	44.4004	43.4075	40.5099	42.3482	42.5961	42.1017	42.4124	43.0845	42.8515	43.0113	42.876	43.0707	42.6344	43.4336	42.735	41.6738		40.4432	42.1733	40.2116	40.8694	39.9874	41.6022	38.1209	39.3589	39.8304	40.8465	42.0902	42.175	42.6624	42.4384	42.5884	42.2017	42.9599	42.8013	40.6193	42.829	43.2519	43.3624	43.1007	43.5311	43.5769
2839.22	43.6631	42.5423	43.3822	44.1587	43.2669	43.8055	43.7405	43.8432	42.8427	39.9494	41.7851	42.0262	41.5379	41.8455	42.5191	42.2792	42.451	42.3116	42.5088	42.0719	42.8675	42.1722	41.1041		39.8734	41.6067	39.6412	40.2935	39.4214	41.0314	37.5512	38.7909	39.256	40.2832	41.5253	41.6104	42.091	41.8705	42.0164	41.634	42.387	42.2298	40.0444	42.2714	42.6918	42.8028	42.5386	42.9671	43.009
2841.15	43.0962	41.9714	42.8187	43.5914	42.6998	43.2421	43.1676	43.2771	42.2724	39.3822	41.208	41.4555	40.9596	41.273	41.9497	41.7061	41.883	41.7423	41.9358	41.5007	42.287	41.5977	40.5192		39.2928	41.0255	39.0643	39.7167	38.8477	40.4513	36.9725	38.213	38.6793	39.7066	40.9467	41.0365	41.5135	41.2972	41.4329	41.0561	41.8036	41.6454	39.4583	41.6955	42.1178	42.2261	41.961	42.3781	42.4314
2843.07	42.5008	41.385	42.231	42.9987	42.1141	42.6613	42.5842	42.6885	41.6828	38.7929	40.6102	40.8662	40.3638	40.68	41.3576	41.1158	41.2914	41.1488	41.3439	40.9079	41.6765	41.0022	39.9175		38.6913	40.4234	38.4633	39.1149	38.2483	39.8488	36.3706	37.6093	38.0862	39.1129	40.3478	40.4356	40.9102	40.6962	40.8309	40.4466	41.1954	41.038	38.8479	41.0849	41.515	41.6291	41.3652	41.7735	41.828
2845	41.8761	40.7721	41.6051	42.3803	41.4968	42.0487	41.9771	42.0654	41.0636	38.1714	39.9798	40.2337	39.7421	40.0513	40.7244	40.4871	40.6637	40.5212	40.7246	40.2808	41.037	40.3801	39.2838		38.0566	39.7943	37.8275	38.4743	37.6172	39.2104	35.7361	36.9754	37.4554	38.4909	39.716	39.7963	40.2669	40.0605	40.1969	39.8012	40.5483	40.3987	38.2047	40.443	40.8689	40.9977	40.738	41.1407	41.1877
2846.93	41.2436	40.1384	40.9781	41.7634	40.876	41.4306	41.353	41.4407	40.437	37.5436	39.3418	39.5993	39.1113	39.413	40.0881	39.8433	40.0286	39.8883	40.0948	39.6526	40.3994	39.7526	38.6481		37.4178	39.1674	37.1927	37.8262	36.9817	38.5699	35.1004	36.3408	36.816	37.8588	39.0793	39.1582	39.6223	39.4229	39.5561	39.1594	39.9028	39.7557	37.5552	39.7966	40.2226	40.3565	40.1075	40.4936	40.541
2848.86	40.6369	39.5257	40.369	41.1658	40.2717	40.8341	40.7459	40.8369	39.8247	36.941	38.7327	38.986	38.4996	38.7985	39.4733	39.2189	39.4182	39.2779	39.4862	39.0473	39.7828	39.1453	38.0386		36.8064	38.5557	36.5846	37.213	36.3681	37.9555	34.4956	35.7323	36.2082	37.2536	38.4726	38.5478	39.0099	38.8162	38.946	38.5477	39.2892	39.1397	36.9506	39.187	39.6184	39.7413	39.5021	39.8822	39.9295
2850.79	40.0724	38.9656	39.8002	40.5999	39.7046	40.2672	40.1817	40.265	39.2519	36.3745	38.1677	38.4101	37.9315	38.2296	38.8961	38.6523	38.8527	38.7091	38.9253	38.4801	39.2123	38.5834	37.474		36.2396	37.9842	36.0218	36.6441	35.8013	37.3884	33.934	35.1705	35.6488	36.7003	37.9136	37.9872	38.4474	38.2582	38.3855	37.9878	38.7314	38.5858	36.3959	38.6306	39.0651	39.1811	38.9439	39.3243	39.3743
2852.72	39.5163	38.4178	39.2434	40.0386	39.1556	39.712	39.6276	39.7119	38.6964	35.8167	37.6145	37.8602	37.3772	37.6784	38.3506	38.1146	38.3079	38.158	38.3799	37.9335	38.6662	38.0472	36.9292		35.6963	37.4433	35.4749	36.0873	35.2569	36.8428	33.3862	34.6267	35.1037	36.1649	37.3731	37.4503	37.9042	37.7177	37.841	37.4499	38.1929	38.0477	35.855	38.0916	38.5377	38.6476	38.4112	38.7829	38.8372
2854.65	38.9704	37.8766	38.6969	39.4849	38.6068	39.1728	39.0761	39.1737	38.1513	35.2675	37.0684	37.3279	36.8351	37.1389	37.8204	37.5851	37.7775	37.6255	37.8445	37.3971	38.1277	37.52	36.393		35.1614	36.9124	34.9393	35.5552	34.7204	36.3059	32.8465	34.0911	34.5677	35.6311	36.846	36.9184	37.373	37.1846	37.3112	36.9183	37.6619	37.5137	35.318	37.553	38.0109	38.1283	37.8931	38.253	38.3078
2856.58	38.4137	37.3224	38.1417	38.9239	38.0489	38.6224	38.5233	38.6247	37.5967	34.7148	36.5151	36.7821	36.2868	36.5915	37.2707	37.035	37.2384	37.084	37.2977	36.8487	37.5801	36.9764	35.8451		34.6072	36.3592	34.3875	35.0098	34.1723	35.7582	32.3007	33.5433	34.0217	35.0863	36.3051	36.3771	36.8306	36.6387	36.7663	36.3738	37.1192	36.9698	34.7596	37.0024	37.4668	37.5878	37.3597	37.7068	37.7658
2858.51	37.8468	36.7648	37.5873	38.3568	37.4931	38.0676	37.9667	38.0749	37.0472	34.1613	35.9642	36.2274	35.7332	36.0468	36.7253	36.4703	36.6995	36.5371	36.7481	36.3009	37.0304	36.4325	35.2911		34.0515	35.8005	33.8329	34.4613	33.6254	35.2044	31.7561	32.9941	33.4759	34.543	35.7583	35.8317	36.2801	36.0922	36.2159	35.8281	36.5662	36.419	34.2024	36.4541	36.9176	37.0407	36.8193	37.1589	37.217
2860.43	37.2749	36.1963	37.0168	37.7911	36.9284	37.5089	37.4111	37.5159	36.4959	33.6079	35.4	35.6704	35.1807	35.4987	36.1788	35.9102	36.1578	35.9818	36.1991	35.7509	36.473	35.8823	34.7351		33.4938	35.2404	33.2841	33.908	33.0684	34.6501	31.2022	32.4414	32.9252	33.996	35.2049	35.2744	35.722	35.5352	35.6603	35.2708	36.0062	35.8628	33.6482	35.9036	36.3643	36.4918	36.2677	36.6077	36.6654
2862.36	36.7095	35.6248	36.4471	37.2379	36.3602	36.9493	36.8594	36.9568	35.9409	33.0561	34.8393	35.1172	34.6313	34.9399	35.6215	35.3692	35.6177	35.4242	35.6501	35.2004	35.9181	35.3311	34.1834		32.9373	34.68	32.7364	33.3459	32.5105	34.0982	30.6467	31.8873	32.3715	33.4464	34.6527	34.72	35.1668	34.982	35.1071	34.7097	35.4525	35.3107	33.0935	35.3478	35.8098	35.9406	35.7135	36.0494	36.1124
2864.29	36.1363	35.0441	35.8664	36.6658	35.7755	36.3683	36.2846	36.3842	35.3667	32.4883	34.2632	34.5354	34.0563	34.3624	35.0548	34.8076	35.0495	34.854	35.0802	34.6268	35.3392	34.7629	33.6109		32.367	34.1037	32.1648	32.768	31.9375	33.5209	30.0768	31.3178	31.8006	32.8776	34.0826	34.1459	34.5902	34.4145	34.5341	34.1304	34.8771	34.734	32.5192	34.7668	35.2417	35.3726	35.1469	35.466	35.5375
2866.22	35.5552	34.4659	35.2785	36.0853	35.1926	35.7926	35.699	35.8098	34.7895	31.9124	33.6787	33.95	33.479	33.7912	34.48	34.2194	34.4754	34.2784	34.5063	34.05	34.7561	34.1894	33.0354		31.792	33.526	31.5883	32.1966	31.3645	32.9361	29.5085	30.7428	31.2284	32.3072	33.5073	33.5648	34.0064	33.8429	33.9535	33.5505	34.2968	34.1556	31.9377	34.1883	34.6673	34.801	34.5796	34.8904	34.96
2868.15	34.9514	33.8739	34.6821	35.4911	34.5999	35.2041	35.1091	35.223	34.196	31.3218	33.0878	33.3635	32.8975	33.2103	33.89	33.6087	33.8918	33.6918	33.9182	33.4638	34.168	33.6039	32.4434		31.2015	32.9421	30.9999	31.6099	30.7814	32.3441	28.9346	30.1594	30.6461	31.7264	32.9181	32.9771	33.4108	33.2556	33.3605	32.9609	33.7034	33.5632	31.3444	33.595	34.0766	34.2104	33.9965	34.3033	34.3701
2870.08	34.343	33.2775	34.0866	34.8797	33.9988	34.6072	34.522	34.631	33.5995	30.7369	32.4948	32.7734	32.3086	32.6191	33.3043	33.0163	33.3046	33.1052	33.3262	32.8733	33.5725	33.0164	31.8475		30.6112	32.3487	30.4124	31.011	30.1964	31.7537	28.3539	29.5813	30.0599	31.1443	32.3264	32.3886	32.8168	32.6647	32.7679	32.3646	33.1058	32.9678	30.7476	32.9973	33.4902	33.615	33.4082	33.7113	33.7776
2872.01	33.7286	32.6757	33.481	34.2634	33.39	34.0062	33.9235	34.0263	33.0013	30.1476	31.8914	32.1729	31.7087	32.0268	32.7021	32.4341	32.7116	32.5094	32.7324	32.2776	32.9655	32.421	31.254		30.0169	31.7424	29.8215	30.4039	29.6012	31.1526	27.7634	28.9922	29.4682	30.5588	31.7335	31.7887	32.2179	32.0698	32.1695	31.7632	32.5002	32.369	30.1527	32.3998	32.8945	33.0154	32.8128	33.1113	33.1755
2873.94	33.1359	32.0813	32.8874	33.6701	32.806	33.4245	33.3373	33.4374	32.4139	29.5727	31.3054	31.5896	31.1279	31.4477	32.1181	31.8607	32.1376	31.9285	32.1536	31.6976	32.3775	31.8367	30.6744		29.4384	31.1619	29.2448	29.8175	29.0225	30.5663	27.1943	28.4152	28.8927	29.9882	31.1591	31.2095	31.6341	31.4919	31.5861	31.1823	31.9134	31.7854	29.5744	31.813	32.3083	32.4366	32.2323	32.519	32.59
2875.86	32.5502	31.4915	32.2933	33.0815	32.2303	32.8337	32.7551	32.854	31.8308	28.9986	30.7196	30.999	30.5453	30.8653	31.5423	31.2677	31.5642	31.3453	31.575	31.1217	31.7844	31.2584	30.0917		28.8616	30.5751	28.6673	29.2411	28.4511	29.9859	26.6257	27.8412	28.3221	29.4121	30.583	30.6288	31.0459	30.9069	31.0051	30.6037	31.3281	31.1987	28.9963	31.2279	31.7245	31.8606	31.6512	31.9307	32.003
2877.79	31.9658	30.9004	31.7014	32.4956	31.643	32.2398	32.1685	32.2675	31.2471	28.4221	30.1313	30.409	29.96	30.2835	30.9549	30.6687	30.9844	30.7614	30.9908	30.538	31.189	30.6813	29.5059		28.2794	29.9809	28.0905	28.67	27.8793	29.4032	26.0556	27.2667	27.7523	28.835	30.0046	30.0446	30.4617	30.322	30.4196	30.0205	30.734	30.6072	28.4111	30.6433	31.1411	31.2668	31.0736	31.3485	31.413
2879.72	31.3621	30.3019	31.0981	31.8821	31.0427	31.6383	31.566	31.6644	30.65	27.8349	29.5359	29.814	29.3679	29.6856	30.3588	30.0743	30.3905	30.1675	30.3956	29.9402	30.587	30.0863	28.91		27.6837	29.3819	27.5057	28.0796	27.289	28.8144	25.4781	26.682	27.1672	28.2528	29.4128	29.4491	29.8649	29.7218	29.8186	29.4284	30.1316	30.0085	27.8226	30.0451	30.5449	30.6686	30.4838	30.7517	30.815
2881.65	30.7534	29.71	30.4938	31.2679	30.4451	31.045	30.9584	31.0645	30.0538	27.2506	28.9445	29.2234	28.7778	29.0884	29.7614	29.4935	29.7987	29.5748	29.8071	29.348	29.9871	29.4912	28.3199		27.0936	28.7992	26.9218	27.4882	26.7012	28.2255	24.9009	26.1001	26.5848	27.6736	28.825	28.8524	29.2664	29.1222	29.221	28.8314	29.5384	29.4138	27.2379	29.4519	29.9482	30.081	29.8916	30.1484	30.22
2883.58	30.1426	29.098	29.8873	30.6587	29.8253	30.4443	30.3455	30.4591	29.4486	26.6646	28.3452	28.6168	28.1835	28.4927	29.1544	28.8942	29.1996	28.9788	29.2084	28.752	29.3804	28.8915	27.7235		26.5056	28.2041	26.3335	26.8913	26.1121	27.623	24.3209	25.5179	26.0017	27.0817	28.2292	28.2506	28.6657	28.52	28.6227	28.2285	28.9349	28.8114	26.6403	28.8471	29.3465	29.4806	29.2987	29.5402	29.6155
2885.51	29.5384	28.4896	29.2814	30.0547	29.2243	29.8409	29.7449	29.8576	28.8518	26.0835	27.7469	28.0211	27.5925	27.9023	28.5592	28.2856	28.6062	28.3825	28.612	28.1589	28.7779	28.2989	27.1321		25.9215	27.5987	25.7463	26.3032	25.5306	27.0253	23.7478	24.9403	25.4228	26.4974	27.6349	27.6553	28.0685	27.9252	28.0293	27.6361	28.3374	28.2126	26.0429	28.2459	28.7494	28.8832	28.7076	28.9411	29.0142
2887.44	28.9225	27.8922	28.6665	29.4444	28.6316	29.2326	29.1326	29.2511	28.2468	25.4917	27.1434	27.417	26.9929	27.3035	27.9581	27.6747	28.0055	27.7782	28.0106	27.5592	28.1692	27.7021	26.5378		25.3276	26.9954	25.1534	25.7094	24.9446	26.4254	23.1748	24.3565	24.8367	25.9092	27.038	27.0623	27.4678	27.329	27.4262	27.0359	27.7358	27.6078	25.4512	27.6398	28.1481	28.2818	28.1037	28.3363	28.4122
2889.37	28.3116	27.298	28.0618	28.8414	28.0318	28.6332	28.5273	28.647	27.6441	24.9082	26.5483	26.8181	26.396	26.7086	27.3602	27.0803	27.411	27.1841	27.4132	26.9637	27.5661	27.1092	25.9465		24.7417	26.4007	24.5708	25.113	24.364	25.8342	22.609	23.779	24.2566	25.3242	26.4476	26.4729	26.8695	26.7384	26.8272	26.4399	27.1358	27.0102	24.8716	27.0413	27.5494	27.6888	27.5075	27.7427	27.8135
2891.3	27.7029	26.6885	27.4619	28.227	27.4189	28.0296	27.9242	28.0368	27.0416	24.3217	25.9468	26.2201	25.7931	26.1124	26.7585	26.4844	26.8104	26.5809	26.8104	26.3651	26.9571	26.5095	25.3478		24.1527	25.7981	23.9873	24.5134	23.7756	25.2331	22.0372	23.1965	23.6712	24.7376	25.8538	25.8749	26.2603	26.1423	26.2225	25.8416	26.5278	26.4081	24.2858	26.435	26.9483	27.0883	26.9093	27.1307	27.2058
2893.22	27.1047	26.0965	26.8557	27.6134	26.81	27.4285	27.3243	27.431	26.439	23.74	25.3473	25.6252	25.1958	25.5168	26.1528	25.8821	26.2143	25.9823	26.2146	25.7705	26.3525	25.9111	24.7525		23.5671	25.1945	23.4082	23.9267	23.1931	24.6365	21.4709	22.6172	23.0914	24.1576	25.2631	25.2769	25.6589	25.5454	25.6242	25.2457	25.9266	25.815	23.6969	25.8312	26.3483	26.4925	26.312	26.5163	26.6058
2895.15	26.4977	25.4982	26.2409	27.0025	26.2005	26.8224	26.7169	26.8273	25.8358	23.1543	24.7473	25.0225	24.6045	24.9139	25.5507	25.2719	25.6196	25.3856	25.6182	25.171	25.7511	25.311	24.1542		22.981	24.5977	22.8211	23.3447	22.6112	24.0436	20.9037	22.0419	22.5123	23.5745	24.6695	24.6749	25.0577	24.9491	25.0235	24.6434	25.3223	25.2131	23.1032	25.2278	25.7471	25.8915	25.7088	25.9143	25.9995
2897.08	25.8956	24.9026	25.6452	26.4061	25.6127	26.2301	26.1214	26.2368	25.2496	22.5836	24.1661	24.4398	24.0247	24.3268	24.9669	24.6808	25.0369	24.7993	25.0327	24.5871	25.1608	24.7301	23.5732		22.4072	24.0229	22.2513	22.7673	22.0451	23.463	20.349	21.4804	21.9486	23.0002	24.0883	24.0875	24.471	24.3633	24.4358	24.0575	24.7299	24.6175	22.5284	24.6394	25.1591	25.2945	25.128	25.3241	25.4051
2899.01	25.2931	24.3001	25.054	25.8046	25.0211	25.6309	25.5255	25.634	24.6533	22.0147	23.5774	23.8573	23.4366	23.739	24.3786	24.093	24.4454	24.2073	24.4447	23.9997	24.5661	24.1475	22.9916		21.8352	23.4329	21.6837	22.1923	21.4766	22.8812	19.7949	20.9158	21.382	22.427	23.5036	23.505	23.8829	23.7677	23.8467	23.4688	24.1359	24.0222	21.9512	24.0491	24.5695	24.7004	24.5464	24.7245	24.809
2900.94	24.6981	23.7141	24.471	25.2099	24.4328	25.0349	24.9262	25.0338	24.0641	21.4511	22.9922	23.2708	22.8466	23.1577	23.7945	23.5132	23.8578	23.6224	23.8572	23.4151	23.9742	23.5619	22.4143		21.2707	22.848	21.1162	21.6149	20.9106	22.3057	19.2451	20.3598	20.8188	21.8616	22.9235	22.9295	23.2934	23.1807	23.2643	22.8863	23.5443	23.4332	21.3747	23.46	23.9826	24.1101	23.9602	24.1286	24.2152
[truncated: 622 more rows]
[truncated: 41 more columns]
