# Supplementary material
Source: MDPI journal article supplement (https://www.mdpi.com/2073-4441/13/11/1475)
Supplement: s1 [file s1 › Supplementary files/S1_2_08092016_File.xls]

## Sheet: Лист1
		all	hc						all	hc		pcum	hgch	hc						hgch	hc		pcum	hypl	hc						hypl	hc		pcum	lyd	hc						lyd	hc		pcum	web	hc
cm-1	nm	Rank Sum	Rank Sum	U	Z	p-level	Z	p-level	Valid N	Valid N	2*1sided		Rank Sum	Rank Sum	U	Z	p-level	Z	p-level	Valid N	Valid N	2*1sided		Rank Sum	Rank Sum	U	Z	p-level	Z	p-level	Valid N	Valid N	2*1sided		Rank Sum	Rank Sum	U	Z	p-level	Z	p-level	Valid N	Valid N	2*1sided		Rank Sum	Rank Sum	U	Z
948.977	10537.7	268	167	62	1.87667	0.0605637	1.87667	0.0605637	15	14	0.0629534		247	188	83	0.960159	0.336976	0.960159	0.336976	15	14	0.353554		254	181	76	1.26566	0.205634	1.26566	0.205634	15	14	0.217176		236	199	94	0.480079	0.631171	0.480079	0.631171	15	14	0.651619		234	201	96	0.392792
950.906	10516.3	267	168	63	1.83303	0.066799	1.83303	0.066799	15	14	0.0696586		247	188	83	0.960159	0.336976	0.960159	0.336976	15	14	0.353554		246	189	84	0.916515	0.359397	0.916515	0.359397	15	14	0.376588		270	165	60	1.96396	0.0495355	1.96396	0.0495355	15	14	0.0510899		255	180	75	1.30931
952.835	10495	263	172	67	1.65846	0.0972264	1.65846	0.0972264	15	14	0.102309		258	177	72	1.44024	0.149801	1.44024	0.149801	15	14	0.158309		251	184	79	1.13473	0.256488	1.13473	0.256488	15	14	0.270299		289	146	41	2.79319	0.00521943	2.79319	0.00521943	15	14	0.00433723		280	155	50	2.4004
954.764	10473.8	266	169	64	1.78939	0.0735535	1.78939	0.0735535	15	14	0.076919		208	227	88	-0.741941	0.458124	-0.741941	0.458124	15	14	0.477307		254	181	76	1.26566	0.205634	1.26566	0.205634	15	14	0.217176		235	200	95	0.436436	0.662521	0.436436	0.662521	15	14	0.682954		261	174	69	1.57117
956.693	10452.7	243	192	87	0.785584	0.432112	0.785584	0.432112	15	14	0.450872		185	250	65	-1.74574	0.0808565	-1.74574	0.0808565	15	14	0.0847612		230	205	100	0.218218	0.827259	0.218218	0.827259	15	14	0.846694		213	222	93	-0.523723	0.600472	-0.523723	0.600472	15	14	0.620867		246	189	84	0.916515
958.622	10431.6	222	213	102	-0.130931	0.89583	-0.130931	0.89583	15	14	0.914475		208	227	88	-0.741941	0.458124	-0.741941	0.458124	15	14	0.477307		220	215	100	-0.218218	0.827259	-0.218218	0.827259	15	14	0.846694		220	215	100	-0.218218	0.827259	-0.218218	0.827259	15	14	0.846694		232	203	98	0.305505
960.55	10410.7	214	221	94	-0.480079	0.631171	-0.480079	0.631171	15	14	0.651619		225	210	105	0	1	0	1	15	14	1.01714		217	218	97	-0.349149	0.726978	-0.349149	0.726978	15	14	0.747192		205	230	85	-0.872872	0.382734	-0.872872	0.382734	15	14	0.400494		240	195	90	0.654654
962.479	10389.8	193	242	73	-1.39659	0.162537	-1.39659	0.162537	15	14	0.171789		216	219	96	-0.392792	0.694473	-0.392792	0.694473	15	14	0.71483		193	242	73	-1.39659	0.162537	-1.39659	0.162537	15	14	0.171789		225	210	105	0	1	0	1	15	14	1.01714		215	220	95	-0.436436
964.408	10369.1	196	239	76	-1.26566	0.205634	-1.26566	0.205634	15	14	0.217176		198	237	78	-1.17838	0.238647	-1.17838	0.238647	15	14	0.251712		223	212	103	-0.0872872	0.930443	-0.0872872	0.930443	15	14	0.948623		198	237	78	-1.17838	0.238647	-1.17838	0.238647	15	14	0.251712		218	217	98	-0.305505
966.337	10348.4	194	241	74	-1.35295	0.176072	-1.35295	0.176072	15	14	0.186083		203	232	83	-0.960159	0.336976	-0.960159	0.336976	15	14	0.353554		203	232	83	-0.960159	0.336976	-0.960159	0.336976	15	14	0.353554		193	242	73	-1.39659	0.162537	-1.39659	0.162537	15	14	0.171789		197	238	77	-1.22202
968.266	10327.7	202	233	82	-1.0038	0.315475	-1.0038	0.315475	15	14	0.331405		211	224	91	-0.61101	0.541193	-0.61101	0.541193	15	14	0.561291		210	225	90	-0.654654	0.512691	-0.654654	0.512691	15	14	0.532545		195	240	75	-1.30931	0.190431	-1.30931	0.190431	15	14	0.201205		199	236	79	-1.13473
970.194	10307.2	224	211	104	-0.0436436	0.965189	-0.0436436	0.965189	15	14	0.982865		209	226	89	-0.698297	0.484992	-0.698297	0.484992	15	14	0.504539		203	232	83	-0.960159	0.336976	-0.960159	0.336976	15	14	0.353554		198	237	78	-1.17838	0.238647	-1.17838	0.238647	15	14	0.251712		216	219	96	-0.392792
972.123	10286.8	218	217	98	-0.305505	0.759982	-0.305505	0.759982	15	14	0.779995		212	223	92	-0.567367	0.570466	-0.567367	0.570466	15	14	0.590745		225	210	105	0	1	0	1	15	14	1.01714		231	204	99	0.261861	0.793428	0.261861	0.793428	15	14	0.813179		203	232	83	-0.960159
974.052	10266.4	199	236	79	-1.13473	0.256488	-1.13473	0.256488	15	14	0.270299		226	209	104	0.0436436	0.965189	0.0436436	0.965189	15	14	0.982865		242	193	88	0.741941	0.458124	0.741941	0.458124	15	14	0.477307		231	204	99	0.261861	0.793428	0.261861	0.793428	15	14	0.813179		184	251	64	-1.78939
975.981	10246.1	203	232	83	-0.960159	0.336976	-0.960159	0.336976	15	14	0.353554		255	180	75	1.30931	0.190431	1.30931	0.190431	15	14	0.201205		257	178	73	1.39659	0.162537	1.39659	0.162537	15	14	0.171789		246	189	84	0.916515	0.359397	0.916515	0.359397	15	14	0.376588		202	233	82	-1.0038
977.91	10225.9	230	205	100	0.218218	0.827259	0.218218	0.827259	15	14	0.846694		240	195	90	0.654654	0.512691	0.654654	0.512691	15	14	0.532545		236	199	94	0.480079	0.631171	0.480079	0.631171	15	14	0.651619		209	226	89	-0.698297	0.484992	-0.698297	0.484992	15	14	0.504539		232	203	98	0.305505
979.839	10205.8	225	210	105	0	1	0	1	15	14	1.01714		219	216	99	-0.261861	0.793428	-0.261861	0.793428	15	14	0.813179		232	203	98	0.305505	0.759982	0.305505	0.759982	15	14	0.779995		196	239	76	-1.26566	0.205634	-1.26566	0.205634	15	14	0.217176		212	223	92	-0.567367
981.767	10185.7	219	216	99	-0.261861	0.793428	-0.261861	0.793428	15	14	0.813179		223	212	103	-0.0872872	0.930443	-0.0872872	0.930443	15	14	0.948623		242	193	88	0.741941	0.458124	0.741941	0.458124	15	14	0.477307		219	216	99	-0.261861	0.793428	-0.261861	0.793428	15	14	0.813179		196	239	76	-1.26566
983.696	10165.7	223	212	103	-0.0872872	0.930443	-0.0872872	0.930443	15	14	0.948623		229	206	101	0.174574	0.861414	0.174574	0.861414	15	14	0.880478		231	204	99	0.261861	0.793428	0.261861	0.793428	15	14	0.813179		222	213	102	-0.130931	0.89583	-0.130931	0.89583	15	14	0.914475		200	235	80	-1.09109
985.625	10145.8	230	205	100	0.218218	0.827259	0.218218	0.827259	15	14	0.846694		224	211	104	-0.0436436	0.965189	-0.0436436	0.965189	15	14	0.982865		224	211	104	-0.0436436	0.965189	-0.0436436	0.965189	15	14	0.982865		223	212	103	-0.0872872	0.930443	-0.0872872	0.930443	15	14	0.948623		201	234	81	-1.04745
987.554	10126	245	190	85	0.872872	0.382734	0.872872	0.382734	15	14	0.400494		230	205	100	0.218218	0.827259	0.218218	0.827259	15	14	0.846694		233	202	97	0.349149	0.726978	0.349149	0.726978	15	14	0.747192		222	213	102	-0.130931	0.89583	-0.130931	0.89583	15	14	0.914475		208	227	88	-0.741941
989.483	10106.3	226	209	104	0.0436436	0.965189	0.0436436	0.965189	15	14	0.982865		233	202	97	0.349149	0.726978	0.349149	0.726978	15	14	0.747192		230	205	100	0.218218	0.827259	0.218218	0.827259	15	14	0.846694		219	216	99	-0.261861	0.793428	-0.261861	0.793428	15	14	0.813179		211	224	91	-0.61101
991.411	10086.6	217	218	97	-0.349149	0.726978	-0.349149	0.726978	15	14	0.747192		221	214	101	-0.174574	0.861414	-0.174574	0.861414	15	14	0.880478		233	202	97	0.349149	0.726978	0.349149	0.726978	15	14	0.747192		211	224	91	-0.61101	0.541193	-0.61101	0.541193	15	14	0.561291		206	229	86	-0.829228
993.34	10067	222	213	102	-0.130931	0.89583	-0.130931	0.89583	15	14	0.914475		214	221	94	-0.480079	0.631171	-0.480079	0.631171	15	14	0.651619		227	208	103	0.0872872	0.930443	0.0872872	0.930443	15	14	0.948623		209	226	89	-0.698297	0.484992	-0.698297	0.484992	15	14	0.504539		198	237	78	-1.17838
995.269	10047.5	213	222	93	-0.523723	0.600472	-0.523723	0.600472	15	14	0.620867		226	209	104	0.0436436	0.965189	0.0436436	0.965189	15	14	0.982865		224	211	104	-0.0436436	0.965189	-0.0436436	0.965189	15	14	0.982865		212	223	92	-0.567367	0.570466	-0.567367	0.570466	15	14	0.590745		192	243	72	-1.44024
997.198	10028.1	216	219	96	-0.392792	0.694473	-0.392792	0.694473	15	14	0.71483		237	198	93	0.523723	0.600472	0.523723	0.600472	15	14	0.620867		237	198	93	0.523723	0.600472	0.523723	0.600472	15	14	0.620867		217	218	97	-0.349149	0.726978	-0.349149	0.726978	15	14	0.747192		202	233	82	-1.0038
999.127	10008.7	221	214	101	-0.174574	0.861414	-0.174574	0.861414	15	14	0.880478		235	200	95	0.436436	0.662521	0.436436	0.662521	15	14	0.682954		236	199	94	0.480079	0.631171	0.480079	0.631171	15	14	0.651619		218	217	98	-0.305505	0.759982	-0.305505	0.759982	15	14	0.779995		209	226	89	-0.698297
1001.06	9989.46	228	207	102	0.130931	0.89583	0.130931	0.89583	15	14	0.914475		247	188	83	0.960159	0.336976	0.960159	0.336976	15	14	0.353554		242	193	88	0.741941	0.458124	0.741941	0.458124	15	14	0.477307		235	200	95	0.436436	0.662521	0.436436	0.662521	15	14	0.682954		225	210	105	0
1002.98	9970.25	239	196	91	0.61101	0.541193	0.61101	0.541193	15	14	0.561291		228	207	102	0.130931	0.89583	0.130931	0.89583	15	14	0.914475		261	174	69	1.57117	0.116144	1.57117	0.116144	15	14	0.122524		237	198	93	0.523723	0.600472	0.523723	0.600472	15	14	0.620867		222	213	102	-0.130931
1004.91	9951.11	240	195	90	0.654654	0.512691	0.654654	0.512691	15	14	0.532545		221	214	101	-0.174574	0.861414	-0.174574	0.861414	15	14	0.880478		263	172	67	1.65846	0.0972264	1.65846	0.0972264	15	14	0.102309		227	208	103	0.0872872	0.930443	0.0872872	0.930443	15	14	0.948623		218	217	98	-0.305505
1006.84	9932.05	220	215	100	-0.218218	0.827259	-0.218218	0.827259	15	14	0.846694		214	221	94	-0.480079	0.631171	-0.480079	0.631171	15	14	0.651619		261	174	69	1.57117	0.116144	1.57117	0.116144	15	14	0.122524		232	203	98	0.305505	0.759982	0.305505	0.759982	15	14	0.779995		214	221	94	-0.480079
1008.77	9913.05	214	221	94	-0.480079	0.631171	-0.480079	0.631171	15	14	0.651619		212	223	92	-0.567367	0.570466	-0.567367	0.570466	15	14	0.590745		257	178	73	1.39659	0.162537	1.39659	0.162537	15	14	0.171789		226	209	104	0.0436436	0.965189	0.0436436	0.965189	15	14	0.982865		217	218	97	-0.349149
1010.7	9894.14	224	211	104	-0.0436436	0.965189	-0.0436436	0.965189	15	14	0.982865		219	216	99	-0.261861	0.793428	-0.261861	0.793428	15	14	0.813179		245	190	85	0.872872	0.382734	0.872872	0.382734	15	14	0.400494		233	202	97	0.349149	0.726978	0.349149	0.726978	15	14	0.747192		206	229	86	-0.829228
1012.63	9875.29	220	215	100	-0.218218	0.827259	-0.218218	0.827259	15	14	0.846694		226	209	104	0.0436436	0.965189	0.0436436	0.965189	15	14	0.982865		243	192	87	0.785584	0.432112	0.785584	0.432112	15	14	0.450872		226	209	104	0.0436436	0.965189	0.0436436	0.965189	15	14	0.982865		211	224	91	-0.61101
1014.56	9856.52	213	222	93	-0.523723	0.600472	-0.523723	0.600472	15	14	0.620867		222	213	102	-0.130931	0.89583	-0.130931	0.89583	15	14	0.914475		241	194	89	0.698297	0.484992	0.698297	0.484992	15	14	0.504539		221	214	101	-0.174574	0.861414	-0.174574	0.861414	15	14	0.880478		214	221	94	-0.480079
1016.49	9837.81	226	209	104	0.0436436	0.965189	0.0436436	0.965189	15	14	0.982865		223	212	103	-0.0872872	0.930443	-0.0872872	0.930443	15	14	0.948623		241	194	89	0.698297	0.484992	0.698297	0.484992	15	14	0.504539		225	210	105	0	1	0	1	15	14	1.01714		209	226	89	-0.698297
1018.41	9819.18	234	201	96	0.392792	0.694473	0.392792	0.694473	15	14	0.71483		220	215	100	-0.218218	0.827259	-0.218218	0.827259	15	14	0.846694		251	184	79	1.13473	0.256488	1.13473	0.256488	15	14	0.270299		229	206	101	0.174574	0.861414	0.174574	0.861414	15	14	0.880478		213	222	93	-0.523723
1020.34	9800.62	237	198	93	0.523723	0.600472	0.523723	0.600472	15	14	0.620867		224	211	104	-0.0436436	0.965189	-0.0436436	0.965189	15	14	0.982865		251	184	79	1.13473	0.256488	1.13473	0.256488	15	14	0.270299		233	202	97	0.349149	0.726978	0.349149	0.726978	15	14	0.747192		217	218	97	-0.349149
1022.27	9782.13	241	194	89	0.698297	0.484992	0.698297	0.484992	15	14	0.504539		231	204	99	0.261861	0.793428	0.261861	0.793428	15	14	0.813179		262	173	68	1.61481	0.106352	1.61481	0.106352	15	14	0.11207		235	200	95	0.436436	0.662521	0.436436	0.662521	15	14	0.682954		225	210	105	0
1024.2	9763.71	245	190	85	0.872872	0.382734	0.872872	0.382734	15	14	0.400494		232	203	98	0.305505	0.759982	0.305505	0.759982	15	14	0.779995		261	174	69	1.57117	0.116144	1.57117	0.116144	15	14	0.122524		236	199	94	0.480079	0.631171	0.480079	0.631171	15	14	0.651619		224	211	104	-0.0436436
1026.13	9745.35	242	193	88	0.741941	0.458124	0.741941	0.458124	15	14	0.477307		219	216	99	-0.261861	0.793428	-0.261861	0.793428	15	14	0.813179		254	181	76	1.26566	0.205634	1.26566	0.205634	15	14	0.217176		234	201	96	0.392792	0.694473	0.392792	0.694473	15	14	0.71483		222	213	102	-0.130931
1028.06	9727.07	235	200	95	0.436436	0.662521	0.436436	0.662521	15	14	0.682954		226	209	104	0.0436436	0.965189	0.0436436	0.965189	15	14	0.982865		256	179	74	1.35295	0.176072	1.35295	0.176072	15	14	0.186083		231	204	99	0.261861	0.793428	0.261861	0.793428	15	14	0.813179		221	214	101	-0.174574
1029.99	9708.85	232	203	98	0.305505	0.759982	0.305505	0.759982	15	14	0.779995		231	204	99	0.261861	0.793428	0.261861	0.793428	15	14	0.813179		260	175	70	1.52753	0.126631	1.52753	0.126631	15	14	0.1337		234	201	96	0.392792	0.694473	0.392792	0.694473	15	14	0.71483		216	219	96	-0.392792
1031.92	9690.71	239	196	91	0.61101	0.541193	0.61101	0.541193	15	14	0.561291		227	208	103	0.0872872	0.930443	0.0872872	0.930443	15	14	0.948623		252	183	78	1.17838	0.238647	1.17838	0.238647	15	14	0.251712		238	197	92	0.567367	0.570466	0.567367	0.570466	15	14	0.590745		213	222	93	-0.523723
1033.85	9672.63	234	201	96	0.392792	0.694473	0.392792	0.694473	15	14	0.71483		224	211	104	-0.0436436	0.965189	-0.0436436	0.965189	15	14	0.982865		254	181	76	1.26566	0.205634	1.26566	0.205634	15	14	0.217176		240	195	90	0.654654	0.512691	0.654654	0.512691	15	14	0.532545		216	219	96	-0.392792
1035.77	9654.61	236	199	94	0.480079	0.631171	0.480079	0.631171	15	14	0.651619		222	213	102	-0.130931	0.89583	-0.130931	0.89583	15	14	0.914475		254	181	76	1.26566	0.205634	1.26566	0.205634	15	14	0.217176		233	202	97	0.349149	0.726978	0.349149	0.726978	15	14	0.747192		221	214	101	-0.174574
1037.7	9636.67	239	196	91	0.61101	0.541193	0.61101	0.541193	15	14	0.561291		234	201	96	0.392792	0.694473	0.392792	0.694473	15	14	0.71483		253	182	77	1.22202	0.221701	1.22202	0.221701	15	14	0.234007		238	197	92	0.567367	0.570466	0.567367	0.570466	15	14	0.590745		219	216	99	-0.261861
1039.63	9618.79	242	193	88	0.741941	0.458124	0.741941	0.458124	15	14	0.477307		225	210	105	0	1	0	1	15	14	1.01714		255	180	75	1.30931	0.190431	1.30931	0.190431	15	14	0.201205		238	197	92	0.567367	0.570466	0.567367	0.570466	15	14	0.590745		215	220	95	-0.436436
1041.56	9600.98	242	193	88	0.741941	0.458124	0.741941	0.458124	15	14	0.477307		224	211	104	-0.0436436	0.965189	-0.0436436	0.965189	15	14	0.982865		256	179	74	1.35295	0.176072	1.35295	0.176072	15	14	0.186083		235	200	95	0.436436	0.662521	0.436436	0.662521	15	14	0.682954		217	218	97	-0.349149
1043.49	9583.23	245	190	85	0.872872	0.382734	0.872872	0.382734	15	14	0.400494		232	203	98	0.305505	0.759982	0.305505	0.759982	15	14	0.779995		259	176	71	1.48388	0.137841	1.48388	0.137841	15	14	0.145619		233	202	97	0.349149	0.726978	0.349149	0.726978	15	14	0.747192		217	218	97	-0.349149
1045.42	9565.55	242	193	88	0.741941	0.458124	0.741941	0.458124	15	14	0.477307		227	208	103	0.0872872	0.930443	0.0872872	0.930443	15	14	0.948623		254	181	76	1.26566	0.205634	1.26566	0.205634	15	14	0.217176		232	203	98	0.305505	0.759982	0.305505	0.759982	15	14	0.779995		215	220	95	-0.436436
1047.35	9547.93	236	199	94	0.480079	0.631171	0.480079	0.631171	15	14	0.651619		222	213	102	-0.130931	0.89583	-0.130931	0.89583	15	14	0.914475		249	186	81	1.04745	0.294895	1.04745	0.294895	15	14	0.310143		232	203	98	0.305505	0.759982	0.305505	0.759982	15	14	0.779995		217	218	97	-0.349149
1049.28	9530.38	229	206	101	0.174574	0.861414	0.174574	0.861414	15	14	0.880478		224	211	104	-0.0436436	0.965189	-0.0436436	0.965189	15	14	0.982865		248	187	82	1.0038	0.315475	1.0038	0.315475	15	14	0.331405		231	204	99	0.261861	0.793428	0.261861	0.793428	15	14	0.813179		217	218	97	-0.349149
1051.2	9512.89	232	203	98	0.305505	0.759982	0.305505	0.759982	15	14	0.779995		225	210	105	0	1	0	1	15	14	1.01714		247	188	83	0.960159	0.336976	0.960159	0.336976	15	14	0.353554		234	201	96	0.392792	0.694473	0.392792	0.694473	15	14	0.71483		218	217	98	-0.305505
1053.13	9495.47	238	197	92	0.567367	0.570466	0.567367	0.570466	15	14	0.590745		225	210	105	0	1	0	1	15	14	1.01714		256	179	74	1.35295	0.176072	1.35295	0.176072	15	14	0.186083		243	192	87	0.785584	0.432112	0.785584	0.432112	15	14	0.450872		221	214	101	-0.174574
1055.06	9478.11	237	198	93	0.523723	0.600472	0.523723	0.600472	15	14	0.620867		230	205	100	0.218218	0.827259	0.218218	0.827259	15	14	0.846694		254	181	76	1.26566	0.205634	1.26566	0.205634	15	14	0.217176		244	191	86	0.829228	0.406976	0.829228	0.406976	15	14	0.425262		221	214	101	-0.174574
1056.99	9460.82	240	195	90	0.654654	0.512691	0.654654	0.512691	15	14	0.532545		230	205	100	0.218218	0.827259	0.218218	0.827259	15	14	0.846694		256	179	74	1.35295	0.176072	1.35295	0.176072	15	14	0.186083		242	193	88	0.741941	0.458124	0.741941	0.458124	15	14	0.477307		223	212	103	-0.0872872
1058.92	9443.58	244	191	86	0.829228	0.406976	0.829228	0.406976	15	14	0.425262		227	208	103	0.0872872	0.930443	0.0872872	0.930443	15	14	0.948623		253	182	77	1.22202	0.221701	1.22202	0.221701	15	14	0.234007		240	195	90	0.654654	0.512691	0.654654	0.512691	15	14	0.532545		221	214	101	-0.174574
1060.85	9426.41	241	194	89	0.698297	0.484992	0.698297	0.484992	15	14	0.504539		229	206	101	0.174574	0.861414	0.174574	0.861414	15	14	0.880478		255	180	75	1.30931	0.190431	1.30931	0.190431	15	14	0.201205		239	196	91	0.61101	0.541193	0.61101	0.541193	15	14	0.561291		219	216	99	-0.261861
1062.78	9409.31	239	196	91	0.61101	0.541193	0.61101	0.541193	15	14	0.561291		228	207	102	0.130931	0.89583	0.130931	0.89583	15	14	0.914475		256	179	74	1.35295	0.176072	1.35295	0.176072	15	14	0.186083		237	198	93	0.523723	0.600472	0.523723	0.600472	15	14	0.620867		221	214	101	-0.174574
1064.71	9392.26	244	191	86	0.829228	0.406976	0.829228	0.406976	15	14	0.425262		232	203	98	0.305505	0.759982	0.305505	0.759982	15	14	0.779995		256	179	74	1.35295	0.176072	1.35295	0.176072	15	14	0.186083		240	195	90	0.654654	0.512691	0.654654	0.512691	15	14	0.532545		220	215	100	-0.218218
1066.64	9375.28	244	191	86	0.829228	0.406976	0.829228	0.406976	15	14	0.425262		230	205	100	0.218218	0.827259	0.218218	0.827259	15	14	0.846694		253	182	77	1.22202	0.221701	1.22202	0.221701	15	14	0.234007		243	192	87	0.785584	0.432112	0.785584	0.432112	15	14	0.450872		221	214	101	-0.174574
1068.56	9358.35	244	191	86	0.829228	0.406976	0.829228	0.406976	15	14	0.425262		232	203	98	0.305505	0.759982	0.305505	0.759982	15	14	0.779995		253	182	77	1.22202	0.221701	1.22202	0.221701	15	14	0.234007		239	196	91	0.61101	0.541193	0.61101	0.541193	15	14	0.561291		220	215	100	-0.218218
1070.49	9341.49	235	200	95	0.436436	0.662521	0.436436	0.662521	15	14	0.682954		229	206	101	0.174574	0.861414	0.174574	0.861414	15	14	0.880478		251	184	79	1.13473	0.256488	1.13473	0.256488	15	14	0.270299		237	198	93	0.523723	0.600472	0.523723	0.600472	15	14	0.620867		216	219	96	-0.392792
1072.42	9324.69	235	200	95	0.436436	0.662521	0.436436	0.662521	15	14	0.682954		231	204	99	0.261861	0.793428	0.261861	0.793428	15	14	0.813179		253	182	77	1.22202	0.221701	1.22202	0.221701	15	14	0.234007		235	200	95	0.436436	0.662521	0.436436	0.662521	15	14	0.682954		219	216	99	-0.261861
1074.35	9307.95	237	198	93	0.523723	0.600472	0.523723	0.600472	15	14	0.620867		233	202	97	0.349149	0.726978	0.349149	0.726978	15	14	0.747192		253	182	77	1.22202	0.221701	1.22202	0.221701	15	14	0.234007		236	199	94	0.480079	0.631171	0.480079	0.631171	15	14	0.651619		221	214	101	-0.174574
1076.28	9291.27	239	196	91	0.61101	0.541193	0.61101	0.541193	15	14	0.561291		230	205	100	0.218218	0.827259	0.218218	0.827259	15	14	0.846694		256	179	74	1.35295	0.176072	1.35295	0.176072	15	14	0.186083		238	197	92	0.567367	0.570466	0.567367	0.570466	15	14	0.590745		219	216	99	-0.261861
1078.21	9274.65	237	198	93	0.523723	0.600472	0.523723	0.600472	15	14	0.620867		226	209	104	0.0436436	0.965189	0.0436436	0.965189	15	14	0.982865		253	182	77	1.22202	0.221701	1.22202	0.221701	15	14	0.234007		236	199	94	0.480079	0.631171	0.480079	0.631171	15	14	0.651619		219	216	99	-0.261861
1080.14	9258.09	239	196	91	0.61101	0.541193	0.61101	0.541193	15	14	0.561291		221	214	101	-0.174574	0.861414	-0.174574	0.861414	15	14	0.880478		249	186	81	1.04745	0.294895	1.04745	0.294895	15	14	0.310143		236	199	94	0.480079	0.631171	0.480079	0.631171	15	14	0.651619		215	220	95	-0.436436
1082.07	9241.58	235	200	95	0.436436	0.662521	0.436436	0.662521	15	14	0.682954		223	212	103	-0.0872872	0.930443	-0.0872872	0.930443	15	14	0.948623		253	182	77	1.22202	0.221701	1.22202	0.221701	15	14	0.234007		237	198	93	0.523723	0.600472	0.523723	0.600472	15	14	0.620867		220	215	100	-0.218218
1083.99	9225.14	233	202	97	0.349149	0.726978	0.349149	0.726978	15	14	0.747192		227	208	103	0.0872872	0.930443	0.0872872	0.930443	15	14	0.948623		252	183	78	1.17838	0.238647	1.17838	0.238647	15	14	0.251712		238	197	92	0.567367	0.570466	0.567367	0.570466	15	14	0.590745		222	213	102	-0.130931
1085.92	9208.75	238	197	92	0.567367	0.570466	0.567367	0.570466	15	14	0.590745		228	207	102	0.130931	0.89583	0.130931	0.89583	15	14	0.914475		253	182	77	1.22202	0.221701	1.22202	0.221701	15	14	0.234007		239	196	91	0.61101	0.541193	0.61101	0.541193	15	14	0.561291		221	214	101	-0.174574
1087.85	9192.43	238	197	92	0.567367	0.570466	0.567367	0.570466	15	14	0.590745		228	207	102	0.130931	0.89583	0.130931	0.89583	15	14	0.914475		254	181	76	1.26566	0.205634	1.26566	0.205634	15	14	0.217176		241	194	89	0.698297	0.484992	0.698297	0.484992	15	14	0.504539		220	215	100	-0.218218
1089.78	9176.16	239	196	91	0.61101	0.541193	0.61101	0.541193	15	14	0.561291		229	206	101	0.174574	0.861414	0.174574	0.861414	15	14	0.880478		255	180	75	1.30931	0.190431	1.30931	0.190431	15	14	0.201205		242	193	88	0.741941	0.458124	0.741941	0.458124	15	14	0.477307		223	212	103	-0.0872872
1091.71	9159.94	240	195	90	0.654654	0.512691	0.654654	0.512691	15	14	0.532545		231	204	99	0.261861	0.793428	0.261861	0.793428	15	14	0.813179		255	180	75	1.30931	0.190431	1.30931	0.190431	15	14	0.201205		239	196	91	0.61101	0.541193	0.61101	0.541193	15	14	0.561291		224	211	104	-0.0436436
1093.64	9143.79	239	196	91	0.61101	0.541193	0.61101	0.541193	15	14	0.561291		229	206	101	0.174574	0.861414	0.174574	0.861414	15	14	0.880478		255	180	75	1.30931	0.190431	1.30931	0.190431	15	14	0.201205		239	196	91	0.61101	0.541193	0.61101	0.541193	15	14	0.561291		226	209	104	0.0436436
1095.57	9127.69	240	195	90	0.654654	0.512691	0.654654	0.512691	15	14	0.532545		227	208	103	0.0872872	0.930443	0.0872872	0.930443	15	14	0.948623		257	178	73	1.39659	0.162537	1.39659	0.162537	15	14	0.171789		240	195	90	0.654654	0.512691	0.654654	0.512691	15	14	0.532545		229	206	101	0.174574
1097.5	9111.65	240	195	90	0.654654	0.512691	0.654654	0.512691	15	14	0.532545		224	211	104	-0.0436436	0.965189	-0.0436436	0.965189	15	14	0.982865		259	176	71	1.48388	0.137841	1.48388	0.137841	15	14	0.145619		241	194	89	0.698297	0.484992	0.698297	0.484992	15	14	0.504539		225	210	105	0
1099.43	9095.66	240	195	90	0.654654	0.512691	0.654654	0.512691	15	14	0.532545		224	211	104	-0.0436436	0.965189	-0.0436436	0.965189	15	14	0.982865		257	178	73	1.39659	0.162537	1.39659	0.162537	15	14	0.171789		242	193	88	0.741941	0.458124	0.741941	0.458124	15	14	0.477307		226	209	104	0.0436436
1101.35	9079.73	237	198	93	0.523723	0.600472	0.523723	0.600472	15	14	0.620867		223	212	103	-0.0872872	0.930443	-0.0872872	0.930443	15	14	0.948623		256	179	74	1.35295	0.176072	1.35295	0.176072	15	14	0.186083		242	193	88	0.741941	0.458124	0.741941	0.458124	15	14	0.477307		225	210	105	0
1103.28	9063.86	237	198	93	0.523723	0.600472	0.523723	0.600472	15	14	0.620867		224	211	104	-0.0436436	0.965189	-0.0436436	0.965189	15	14	0.982865		255	180	75	1.30931	0.190431	1.30931	0.190431	15	14	0.201205		242	193	88	0.741941	0.458124	0.741941	0.458124	15	14	0.477307		222	213	102	-0.130931
1105.21	9048.04	236	199	94	0.480079	0.631171	0.480079	0.631171	15	14	0.651619		228	207	102	0.130931	0.89583	0.130931	0.89583	15	14	0.914475		256	179	74	1.35295	0.176072	1.35295	0.176072	15	14	0.186083		239	196	91	0.61101	0.541193	0.61101	0.541193	15	14	0.561291		222	213	102	-0.130931
1107.14	9032.28	235	200	95	0.436436	0.662521	0.436436	0.662521	15	14	0.682954		228	207	102	0.130931	0.89583	0.130931	0.89583	15	14	0.914475		254	181	76	1.26566	0.205634	1.26566	0.205634	15	14	0.217176		238	197	92	0.567367	0.570466	0.567367	0.570466	15	14	0.590745		223	212	103	-0.0872872
1109.07	9016.57	236	199	94	0.480079	0.631171	0.480079	0.631171	15	14	0.651619		226	209	104	0.0436436	0.965189	0.0436436	0.965189	15	14	0.982865		257	178	73	1.39659	0.162537	1.39659	0.162537	15	14	0.171789		240	195	90	0.654654	0.512691	0.654654	0.512691	15	14	0.532545		225	210	105	0
1111	9000.92	238	197	92	0.567367	0.570466	0.567367	0.570466	15	14	0.590745		227	208	103	0.0872872	0.930443	0.0872872	0.930443	15	14	0.948623		258	177	72	1.44024	0.149801	1.44024	0.149801	15	14	0.158309		243	192	87	0.785584	0.432112	0.785584	0.432112	15	14	0.450872		224	211	104	-0.0436436
1112.93	8985.32	237	198	93	0.523723	0.600472	0.523723	0.600472	15	14	0.620867		226	209	104	0.0436436	0.965189	0.0436436	0.965189	15	14	0.982865		254	181	76	1.26566	0.205634	1.26566	0.205634	15	14	0.217176		243	192	87	0.785584	0.432112	0.785584	0.432112	15	14	0.450872		221	214	101	-0.174574
1114.86	8969.77	237	198	93	0.523723	0.600472	0.523723	0.600472	15	14	0.620867		228	207	102	0.130931	0.89583	0.130931	0.89583	15	14	0.914475		255	180	75	1.30931	0.190431	1.30931	0.190431	15	14	0.201205		242	193	88	0.741941	0.458124	0.741941	0.458124	15	14	0.477307		221	214	101	-0.174574
1116.78	8954.28	236	199	94	0.480079	0.631171	0.480079	0.631171	15	14	0.651619		229	206	101	0.174574	0.861414	0.174574	0.861414	15	14	0.880478		256	179	74	1.35295	0.176072	1.35295	0.176072	15	14	0.186083		242	193	88	0.741941	0.458124	0.741941	0.458124	15	14	0.477307		222	213	102	-0.130931
1118.71	8938.84	239	196	91	0.61101	0.541193	0.61101	0.541193	15	14	0.561291		229	206	101	0.174574	0.861414	0.174574	0.861414	15	14	0.880478		253	182	77	1.22202	0.221701	1.22202	0.221701	15	14	0.234007		244	191	86	0.829228	0.406976	0.829228	0.406976	15	14	0.425262		224	211	104	-0.0436436
1120.64	8923.46	241	194	89	0.698297	0.484992	0.698297	0.484992	15	14	0.504539		230	205	100	0.218218	0.827259	0.218218	0.827259	15	14	0.846694		255	180	75	1.30931	0.190431	1.30931	0.190431	15	14	0.201205		244	191	86	0.829228	0.406976	0.829228	0.406976	15	14	0.425262		225	210	105	0
1122.57	8908.12	240	195	90	0.654654	0.512691	0.654654	0.512691	15	14	0.532545		228	207	102	0.130931	0.89583	0.130931	0.89583	15	14	0.914475		256	179	74	1.35295	0.176072	1.35295	0.176072	15	14	0.186083		244	191	86	0.829228	0.406976	0.829228	0.406976	15	14	0.425262		224	211	104	-0.0436436
1124.5	8892.84	240	195	90	0.654654	0.512691	0.654654	0.512691	15	14	0.532545		229	206	101	0.174574	0.861414	0.174574	0.861414	15	14	0.880478		257	178	73	1.39659	0.162537	1.39659	0.162537	15	14	0.171789		244	191	86	0.829228	0.406976	0.829228	0.406976	15	14	0.425262		221	214	101	-0.174574
1126.43	8877.62	241	194	89	0.698297	0.484992	0.698297	0.484992	15	14	0.504539		232	203	98	0.305505	0.759982	0.305505	0.759982	15	14	0.779995		256	179	74	1.35295	0.176072	1.35295	0.176072	15	14	0.186083		244	191	86	0.829228	0.406976	0.829228	0.406976	15	14	0.425262		222	213	102	-0.130931
1128.36	8862.44	240	195	90	0.654654	0.512691	0.654654	0.512691	15	14	0.532545		230	205	100	0.218218	0.827259	0.218218	0.827259	15	14	0.846694		255	180	75	1.30931	0.190431	1.30931	0.190431	15	14	0.201205		245	190	85	0.872872	0.382734	0.872872	0.382734	15	14	0.400494		225	210	105	0
1130.29	8847.32	242	193	88	0.741941	0.458124	0.741941	0.458124	15	14	0.477307		232	203	98	0.305505	0.759982	0.305505	0.759982	15	14	0.779995		259	176	71	1.48388	0.137841	1.48388	0.137841	15	14	0.145619		244	191	86	0.829228	0.406976	0.829228	0.406976	15	14	0.425262		222	213	102	-0.130931
1132.21	8832.24	240	195	90	0.654654	0.512691	0.654654	0.512691	15	14	0.532545		232	203	98	0.305505	0.759982	0.305505	0.759982	15	14	0.779995		257	178	73	1.39659	0.162537	1.39659	0.162537	15	14	0.171789		244	191	86	0.829228	0.406976	0.829228	0.406976	15	14	0.425262		221	214	101	-0.174574
1134.14	8817.22	240	195	90	0.654654	0.512691	0.654654	0.512691	15	14	0.532545		231	204	99	0.261861	0.793428	0.261861	0.793428	15	14	0.813179		257	178	73	1.39659	0.162537	1.39659	0.162537	15	14	0.171789		247	188	83	0.960159	0.336976	0.960159	0.336976	15	14	0.353554		222	213	102	-0.130931
1136.07	8802.25	241	194	89	0.698297	0.484992	0.698297	0.484992	15	14	0.504539		229	206	101	0.174574	0.861414	0.174574	0.861414	15	14	0.880478		256	179	74	1.35295	0.176072	1.35295	0.176072	15	14	0.186083		246	189	84	0.916515	0.359397	0.916515	0.359397	15	14	0.376588		223	212	103	-0.0872872
1138	8787.34	241	194	89	0.698297	0.484992	0.698297	0.484992	15	14	0.504539		232	203	98	0.305505	0.759982	0.305505	0.759982	15	14	0.779995		257	178	73	1.39659	0.162537	1.39659	0.162537	15	14	0.171789		249	186	81	1.04745	0.294895	1.04745	0.294895	15	14	0.310143		224	211	104	-0.0436436
1139.93	8772.47	240	195	90	0.654654	0.512691	0.654654	0.512691	15	14	0.532545		233	202	97	0.349149	0.726978	0.349149	0.726978	15	14	0.747192		257	178	73	1.39659	0.162537	1.39659	0.162537	15	14	0.171789		247	188	83	0.960159	0.336976	0.960159	0.336976	15	14	0.353554		224	211	104	-0.0436436
1141.86	8757.65	238	197	92	0.567367	0.570466	0.567367	0.570466	15	14	0.590745		234	201	96	0.392792	0.694473	0.392792	0.694473	15	14	0.71483		257	178	73	1.39659	0.162537	1.39659	0.162537	15	14	0.171789		245	190	85	0.872872	0.382734	0.872872	0.382734	15	14	0.400494		222	213	102	-0.130931
1143.79	8742.88	239	196	91	0.61101	0.541193	0.61101	0.541193	15	14	0.561291		234	201	96	0.392792	0.694473	0.392792	0.694473	15	14	0.71483		257	178	73	1.39659	0.162537	1.39659	0.162537	15	14	0.171789		244	191	86	0.829228	0.406976	0.829228	0.406976	15	14	0.425262		224	211	104	-0.0436436
1145.72	8728.16	239	196	91	0.61101	0.541193	0.61101	0.541193	15	14	0.561291		235	200	95	0.436436	0.662521	0.436436	0.662521	15	14	0.682954		258	177	72	1.44024	0.149801	1.44024	0.149801	15	14	0.158309		245	190	85	0.872872	0.382734	0.872872	0.382734	15	14	0.400494		224	211	104	-0.0436436
1147.65	8713.49	240	195	90	0.654654	0.512691	0.654654	0.512691	15	14	0.532545		235	200	95	0.436436	0.662521	0.436436	0.662521	15	14	0.682954		256	179	74	1.35295	0.176072	1.35295	0.176072	15	14	0.186083		247	188	83	0.960159	0.336976	0.960159	0.336976	15	14	0.353554		224	211	104	-0.0436436
1149.57	8698.87	240	195	90	0.654654	0.512691	0.654654	0.512691	15	14	0.532545		235	200	95	0.436436	0.662521	0.436436	0.662521	15	14	0.682954		256	179	74	1.35295	0.176072	1.35295	0.176072	15	14	0.186083		246	189	84	0.916515	0.359397	0.916515	0.359397	15	14	0.376588		223	212	103	-0.0872872
1151.5	8684.3	241	194	89	0.698297	0.484992	0.698297	0.484992	15	14	0.504539		232	203	98	0.305505	0.759982	0.305505	0.759982	15	14	0.779995		258	177	72	1.44024	0.149801	1.44024	0.149801	15	14	0.158309		245	190	85	0.872872	0.382734	0.872872	0.382734	15	14	0.400494		224	211	104	-0.0436436
1153.43	8669.78	243	192	87	0.785584	0.432112	0.785584	0.432112	15	14	0.450872		233	202	97	0.349149	0.726978	0.349149	0.726978	15	14	0.747192		257	178	73	1.39659	0.162537	1.39659	0.162537	15	14	0.171789		246	189	84	0.916515	0.359397	0.916515	0.359397	15	14	0.376588		225	210	105	0
1155.36	8655.31	240	195	90	0.654654	0.512691	0.654654	0.512691	15	14	0.532545		233	202	97	0.349149	0.726978	0.349149	0.726978	15	14	0.747192		258	177	72	1.44024	0.149801	1.44024	0.149801	15	14	0.158309		248	187	82	1.0038	0.315475	1.0038	0.315475	15	14	0.331405		224	211	104	-0.0436436
1157.29	8640.88	240	195	90	0.654654	0.512691	0.654654	0.512691	15	14	0.532545		233	202	97	0.349149	0.726978	0.349149	0.726978	15	14	0.747192		258	177	72	1.44024	0.149801	1.44024	0.149801	15	14	0.158309		250	185	80	1.09109	0.275234	1.09109	0.275234	15	14	0.289776		223	212	103	-0.0872872
1159.22	8626.5	240	195	90	0.654654	0.512691	0.654654	0.512691	15	14	0.532545		233	202	97	0.349149	0.726978	0.349149	0.726978	15	14	0.747192		257	178	73	1.39659	0.162537	1.39659	0.162537	15	14	0.171789		250	185	80	1.09109	0.275234	1.09109	0.275234	15	14	0.289776		224	211	104	-0.0436436
1161.15	8612.17	240	195	90	0.654654	0.512691	0.654654	0.512691	15	14	0.532545		235	200	95	0.436436	0.662521	0.436436	0.662521	15	14	0.682954		257	178	73	1.39659	0.162537	1.39659	0.162537	15	14	0.171789		249	186	81	1.04745	0.294895	1.04745	0.294895	15	14	0.310143		223	212	103	-0.0872872
1163.08	8597.89	239	196	91	0.61101	0.541193	0.61101	0.541193	15	14	0.561291		234	201	96	0.392792	0.694473	0.392792	0.694473	15	14	0.71483		255	180	75	1.30931	0.190431	1.30931	0.190431	15	14	0.201205		248	187	82	1.0038	0.315475	1.0038	0.315475	15	14	0.331405		223	212	103	-0.0872872
1165	8583.66	241	194	89	0.698297	0.484992	0.698297	0.484992	15	14	0.504539		234	201	96	0.392792	0.694473	0.392792	0.694473	15	14	0.71483		255	180	75	1.30931	0.190431	1.30931	0.190431	15	14	0.201205		246	189	84	0.916515	0.359397	0.916515	0.359397	15	14	0.376588		222	213	102	-0.130931
1166.93	8569.47	240	195	90	0.654654	0.512691	0.654654	0.512691	15	14	0.532545		235	200	95	0.436436	0.662521	0.436436	0.662521	15	14	0.682954		255	180	75	1.30931	0.190431	1.30931	0.190431	15	14	0.201205		247	188	83	0.960159	0.336976	0.960159	0.336976	15	14	0.353554		223	212	103	-0.0872872
1168.86	8555.33	239	196	91	0.61101	0.541193	0.61101	0.541193	15	14	0.561291		234	201	96	0.392792	0.694473	0.392792	0.694473	15	14	0.71483		257	178	73	1.39659	0.162537	1.39659	0.162537	15	14	0.171789		248	187	82	1.0038	0.315475	1.0038	0.315475	15	14	0.331405		223	212	103	-0.0872872
1170.79	8541.23	241	194	89	0.698297	0.484992	0.698297	0.484992	15	14	0.504539		234	201	96	0.392792	0.694473	0.392792	0.694473	15	14	0.71483		257	178	73	1.39659	0.162537	1.39659	0.162537	15	14	0.171789		250	185	80	1.09109	0.275234	1.09109	0.275234	15	14	0.289776		223	212	103	-0.0872872
1172.72	8527.18	243	192	87	0.785584	0.432112	0.785584	0.432112	15	14	0.450872		235	200	95	0.436436	0.662521	0.436436	0.662521	15	14	0.682954		260	175	70	1.52753	0.126631	1.52753	0.126631	15	14	0.1337		251	184	79	1.13473	0.256488	1.13473	0.256488	15	14	0.270299		224	211	104	-0.0436436
1174.65	8513.18	241	194	89	0.698297	0.484992	0.698297	0.484992	15	14	0.504539		235	200	95	0.436436	0.662521	0.436436	0.662521	15	14	0.682954		257	178	73	1.39659	0.162537	1.39659	0.162537	15	14	0.171789		251	184	79	1.13473	0.256488	1.13473	0.256488	15	14	0.270299		223	212	103	-0.0872872
1176.58	8499.23	240	195	90	0.654654	0.512691	0.654654	0.512691	15	14	0.532545		233	202	97	0.349149	0.726978	0.349149	0.726978	15	14	0.747192		256	179	74	1.35295	0.176072	1.35295	0.176072	15	14	0.186083		248	187	82	1.0038	0.315475	1.0038	0.315475	15	14	0.331405		223	212	103	-0.0872872
1178.51	8485.32	242	193	88	0.741941	0.458124	0.741941	0.458124	15	14	0.477307		235	200	95	0.436436	0.662521	0.436436	0.662521	15	14	0.682954		257	178	73	1.39659	0.162537	1.39659	0.162537	15	14	0.171789		249	186	81	1.04745	0.294895	1.04745	0.294895	15	14	0.310143		225	210	105	0
1180.44	8471.45	243	192	87	0.785584	0.432112	0.785584	0.432112	15	14	0.450872		236	199	94	0.480079	0.631171	0.480079	0.631171	15	14	0.651619		258	177	72	1.44024	0.149801	1.44024	0.149801	15	14	0.158309		251	184	79	1.13473	0.256488	1.13473	0.256488	15	14	0.270299		226	209	104	0.0436436
1182.36	8457.63	242	193	88	0.741941	0.458124	0.741941	0.458124	15	14	0.477307		235	200	95	0.436436	0.662521	0.436436	0.662521	15	14	0.682954		258	177	72	1.44024	0.149801	1.44024	0.149801	15	14	0.158309		251	184	79	1.13473	0.256488	1.13473	0.256488	15	14	0.270299		225	210	105	0
1184.29	8443.86	241	194	89	0.698297	0.484992	0.698297	0.484992	15	14	0.504539		233	202	97	0.349149	0.726978	0.349149	0.726978	15	14	0.747192		256	179	74	1.35295	0.176072	1.35295	0.176072	15	14	0.186083		251	184	79	1.13473	0.256488	1.13473	0.256488	15	14	0.270299		224	211	104	-0.0436436
1186.22	8430.13	241	194	89	0.698297	0.484992	0.698297	0.484992	15	14	0.504539		234	201	96	0.392792	0.694473	0.392792	0.694473	15	14	0.71483		257	178	73	1.39659	0.162537	1.39659	0.162537	15	14	0.171789		252	183	78	1.17838	0.238647	1.17838	0.238647	15	14	0.251712		224	211	104	-0.0436436
1188.15	8416.44	241	194	89	0.698297	0.484992	0.698297	0.484992	15	14	0.504539		235	200	95	0.436436	0.662521	0.436436	0.662521	15	14	0.682954		258	177	72	1.44024	0.149801	1.44024	0.149801	15	14	0.158309		250	185	80	1.09109	0.275234	1.09109	0.275234	15	14	0.289776		224	211	104	-0.0436436
1190.08	8402.8	243	192	87	0.785584	0.432112	0.785584	0.432112	15	14	0.450872		237	198	93	0.523723	0.600472	0.523723	0.600472	15	14	0.620867		259	176	71	1.48388	0.137841	1.48388	0.137841	15	14	0.145619		248	187	82	1.0038	0.315475	1.0038	0.315475	15	14	0.331405		223	212	103	-0.0872872
1192.01	8389.2	243	192	87	0.785584	0.432112	0.785584	0.432112	15	14	0.450872		236	199	94	0.480079	0.631171	0.480079	0.631171	15	14	0.651619		258	177	72	1.44024	0.149801	1.44024	0.149801	15	14	0.158309		249	186	81	1.04745	0.294895	1.04745	0.294895	15	14	0.310143		222	213	102	-0.130931
1193.94	8375.65	242	193	88	0.741941	0.458124	0.741941	0.458124	15	14	0.477307		236	199	94	0.480079	0.631171	0.480079	0.631171	15	14	0.651619		258	177	72	1.44024	0.149801	1.44024	0.149801	15	14	0.158309		250	185	80	1.09109	0.275234	1.09109	0.275234	15	14	0.289776		222	213	102	-0.130931
1195.87	8362.14	241	194	89	0.698297	0.484992	0.698297	0.484992	15	14	0.504539		236	199	94	0.480079	0.631171	0.480079	0.631171	15	14	0.651619		258	177	72	1.44024	0.149801	1.44024	0.149801	15	14	0.158309		252	183	78	1.17838	0.238647	1.17838	0.238647	15	14	0.251712		223	212	103	-0.0872872
1197.79	8348.68	242	193	88	0.741941	0.458124	0.741941	0.458124	15	14	0.477307		236	199	94	0.480079	0.631171	0.480079	0.631171	15	14	0.651619		261	174	69	1.57117	0.116144	1.57117	0.116144	15	14	0.122524		252	183	78	1.17838	0.238647	1.17838	0.238647	15	14	0.251712		224	211	104	-0.0436436
1199.72	8335.25	243	192	87	0.785584	0.432112	0.785584	0.432112	15	14	0.450872		238	197	92	0.567367	0.570466	0.567367	0.570466	15	14	0.590745		260	175	70	1.52753	0.126631	1.52753	0.126631	15	14	0.1337		254	181	76	1.26566	0.205634	1.26566	0.205634	15	14	0.217176		223	212	103	-0.0872872
1201.65	8321.87	244	191	86	0.829228	0.406976	0.829228	0.406976	15	14	0.425262		237	198	93	0.523723	0.600472	0.523723	0.600472	15	14	0.620867		260	175	70	1.52753	0.126631	1.52753	0.126631	15	14	0.1337		252	183	78	1.17838	0.238647	1.17838	0.238647	15	14	0.251712		225	210	105	0
1203.58	8308.54	243	192	87	0.785584	0.432112	0.785584	0.432112	15	14	0.450872		236	199	94	0.480079	0.631171	0.480079	0.631171	15	14	0.651619		260	175	70	1.52753	0.126631	1.52753	0.126631	15	14	0.1337		249	186	81	1.04745	0.294895	1.04745	0.294895	15	14	0.310143		223	212	103	-0.0872872
1205.51	8295.24	243	192	87	0.785584	0.432112	0.785584	0.432112	15	14	0.450872		237	198	93	0.523723	0.600472	0.523723	0.600472	15	14	0.620867		259	176	71	1.48388	0.137841	1.48388	0.137841	15	14	0.145619		252	183	78	1.17838	0.238647	1.17838	0.238647	15	14	0.251712		224	211	104	-0.0436436
1207.44	8281.99	243	192	87	0.785584	0.432112	0.785584	0.432112	15	14	0.450872		237	198	93	0.523723	0.600472	0.523723	0.600472	15	14	0.620867		259	176	71	1.48388	0.137841	1.48388	0.137841	15	14	0.145619		252	183	78	1.17838	0.238647	1.17838	0.238647	15	14	0.251712		223	212	103	-0.0872872
1209.37	8268.78	244	191	86	0.829228	0.406976	0.829228	0.406976	15	14	0.425262		236	199	94	0.480079	0.631171	0.480079	0.631171	15	14	0.651619		259	176	71	1.48388	0.137841	1.48388	0.137841	15	14	0.145619		252	183	78	1.17838	0.238647	1.17838	0.238647	15	14	0.251712		223	212	103	-0.0872872
1211.3	8255.62	242	193	88	0.741941	0.458124	0.741941	0.458124	15	14	0.477307		235	200	95	0.436436	0.662521	0.436436	0.662521	15	14	0.682954		258	177	72	1.44024	0.149801	1.44024	0.149801	15	14	0.158309		251	184	79	1.13473	0.256488	1.13473	0.256488	15	14	0.270299		222	213	102	-0.130931
1213.23	8242.49	242	193	88	0.741941	0.458124	0.741941	0.458124	15	14	0.477307		237	198	93	0.523723	0.600472	0.523723	0.600472	15	14	0.620867		260	175	70	1.52753	0.126631	1.52753	0.126631	15	14	0.1337		250	185	80	1.09109	0.275234	1.09109	0.275234	15	14	0.289776		223	212	103	-0.0872872
1215.15	8229.41	243	192	87	0.785584	0.432112	0.785584	0.432112	15	14	0.450872		237	198	93	0.523723	0.600472	0.523723	0.600472	15	14	0.620867		260	175	70	1.52753	0.126631	1.52753	0.126631	15	14	0.1337		250	185	80	1.09109	0.275234	1.09109	0.275234	15	14	0.289776		224	211	104	-0.0436436
1217.08	8216.37	243	192	87	0.785584	0.432112	0.785584	0.432112	15	14	0.450872		237	198	93	0.523723	0.600472	0.523723	0.600472	15	14	0.620867		259	176	71	1.48388	0.137841	1.48388	0.137841	15	14	0.145619		250	185	80	1.09109	0.275234	1.09109	0.275234	15	14	0.289776		223	212	103	-0.0872872
1219.01	8203.37	242	193	88	0.741941	0.458124	0.741941	0.458124	15	14	0.477307		236	199	94	0.480079	0.631171	0.480079	0.631171	15	14	0.651619		259	176	71	1.48388	0.137841	1.48388	0.137841	15	14	0.145619		251	184	79	1.13473	0.256488	1.13473	0.256488	15	14	0.270299		223	212	103	-0.0872872
1220.94	8190.41	243	192	87	0.785584	0.432112	0.785584	0.432112	15	14	0.450872		236	199	94	0.480079	0.631171	0.480079	0.631171	15	14	0.651619		259	176	71	1.48388	0.137841	1.48388	0.137841	15	14	0.145619		252	183	78	1.17838	0.238647	1.17838	0.238647	15	14	0.251712		223	212	103	-0.0872872
1222.87	8177.49	241	194	89	0.698297	0.484992	0.698297	0.484992	15	14	0.504539		237	198	93	0.523723	0.600472	0.523723	0.600472	15	14	0.620867		258	177	72	1.44024	0.149801	1.44024	0.149801	15	14	0.158309		253	182	77	1.22202	0.221701	1.22202	0.221701	15	14	0.234007		223	212	103	-0.0872872
1224.8	8164.61	242	193	88	0.741941	0.458124	0.741941	0.458124	15	14	0.477307		238	197	92	0.567367	0.570466	0.567367	0.570466	15	14	0.590745		259	176	71	1.48388	0.137841	1.48388	0.137841	15	14	0.145619		252	183	78	1.17838	0.238647	1.17838	0.238647	15	14	0.251712		223	212	103	-0.0872872
1226.73	8151.77	242	193	88	0.741941	0.458124	0.741941	0.458124	15	14	0.477307		238	197	92	0.567367	0.570466	0.567367	0.570466	15	14	0.590745		258	177	72	1.44024	0.149801	1.44024	0.149801	15	14	0.158309		253	182	77	1.22202	0.221701	1.22202	0.221701	15	14	0.234007		223	212	103	-0.0872872
1228.66	8138.98	241	194	89	0.698297	0.484992	0.698297	0.484992	15	14	0.504539		236	199	94	0.480079	0.631171	0.480079	0.631171	15	14	0.651619		259	176	71	1.48388	0.137841	1.48388	0.137841	15	14	0.145619		255	180	75	1.30931	0.190431	1.30931	0.190431	15	14	0.201205		223	212	103	-0.0872872
1230.58	8126.22	242	193	88	0.741941	0.458124	0.741941	0.458124	15	14	0.477307		238	197	92	0.567367	0.570466	0.567367	0.570466	15	14	0.590745		259	176	71	1.48388	0.137841	1.48388	0.137841	15	14	0.145619		254	181	76	1.26566	0.205634	1.26566	0.205634	15	14	0.217176		223	212	103	-0.0872872
1232.51	8113.5	242	193	88	0.741941	0.458124	0.741941	0.458124	15	14	0.477307		238	197	92	0.567367	0.570466	0.567367	0.570466	15	14	0.590745		258	177	72	1.44024	0.149801	1.44024	0.149801	15	14	0.158309		254	181	76	1.26566	0.205634	1.26566	0.205634	15	14	0.217176		225	210	105	0
1234.44	8100.82	242	193	88	0.741941	0.458124	0.741941	0.458124	15	14	0.477307		236	199	94	0.480079	0.631171	0.480079	0.631171	15	14	0.651619		260	175	70	1.52753	0.126631	1.52753	0.126631	15	14	0.1337		252	183	78	1.17838	0.238647	1.17838	0.238647	15	14	0.251712		226	209	104	0.0436436
1236.37	8088.19	243	192	87	0.785584	0.432112	0.785584	0.432112	15	14	0.450872		235	200	95	0.436436	0.662521	0.436436	0.662521	15	14	0.682954		260	175	70	1.52753	0.126631	1.52753	0.126631	15	14	0.1337		254	181	76	1.26566	0.205634	1.26566	0.205634	15	14	0.217176		225	210	105	0
1238.3	8075.59	241	194	89	0.698297	0.484992	0.698297	0.484992	15	14	0.504539		236	199	94	0.480079	0.631171	0.480079	0.631171	15	14	0.651619		258	177	72	1.44024	0.149801	1.44024	0.149801	15	14	0.158309		254	181	76	1.26566	0.205634	1.26566	0.205634	15	14	0.217176		225	210	105	0
1240.23	8063.03	242	193	88	0.741941	0.458124	0.741941	0.458124	15	14	0.477307		237	198	93	0.523723	0.600472	0.523723	0.600472	15	14	0.620867		259	176	71	1.48388	0.137841	1.48388	0.137841	15	14	0.145619		253	182	77	1.22202	0.221701	1.22202	0.221701	15	14	0.234007		224	211	104	-0.0436436
1242.16	8050.51	244	191	86	0.829228	0.406976	0.829228	0.406976	15	14	0.425262		239	196	91	0.61101	0.541193	0.61101	0.541193	15	14	0.561291		259	176	71	1.48388	0.137841	1.48388	0.137841	15	14	0.145619		251	184	79	1.13473	0.256488	1.13473	0.256488	15	14	0.270299		225	210	105	0
1244.09	8038.03	243	192	87	0.785584	0.432112	0.785584	0.432112	15	14	0.450872		238	197	92	0.567367	0.570466	0.567367	0.570466	15	14	0.590745		259	176	71	1.48388	0.137841	1.48388	0.137841	15	14	0.145619		253	182	77	1.22202	0.221701	1.22202	0.221701	15	14	0.234007		225	210	105	0
1246.02	8025.58	242	193	88	0.741941	0.458124	0.741941	0.458124	15	14	0.477307		236	199	94	0.480079	0.631171	0.480079	0.631171	15	14	0.651619		258	177	72	1.44024	0.149801	1.44024	0.149801	15	14	0.158309		254	181	76	1.26566	0.205634	1.26566	0.205634	15	14	0.217176		226	209	104	0.0436436
1247.94	8013.18	242	193	88	0.741941	0.458124	0.741941	0.458124	15	14	0.477307		236	199	94	0.480079	0.631171	0.480079	0.631171	15	14	0.651619		257	178	73	1.39659	0.162537	1.39659	0.162537	15	14	0.171789		254	181	76	1.26566	0.205634	1.26566	0.205634	15	14	0.217176		225	210	105	0
1249.87	8000.81	243	192	87	0.785584	0.432112	0.785584	0.432112	15	14	0.450872		237	198	93	0.523723	0.600472	0.523723	0.600472	15	14	0.620867		258	177	72	1.44024	0.149801	1.44024	0.149801	15	14	0.158309		253	182	77	1.22202	0.221701	1.22202	0.221701	15	14	0.234007		225	210	105	0
1251.8	7988.49	241	194	89	0.698297	0.484992	0.698297	0.484992	15	14	0.504539		236	199	94	0.480079	0.631171	0.480079	0.631171	15	14	0.651619		259	176	71	1.48388	0.137841	1.48388	0.137841	15	14	0.145619		253	182	77	1.22202	0.221701	1.22202	0.221701	15	14	0.234007		226	209	104	0.0436436
1253.73	7976.2	240	195	90	0.654654	0.512691	0.654654	0.512691	15	14	0.532545		234	201	96	0.392792	0.694473	0.392792	0.694473	15	14	0.71483		258	177	72	1.44024	0.149801	1.44024	0.149801	15	14	0.158309		252	183	78	1.17838	0.238647	1.17838	0.238647	15	14	0.251712		227	208	103	0.0872872
1255.66	7963.94	240	195	90	0.654654	0.512691	0.654654	0.512691	15	14	0.532545		231	204	99	0.261861	0.793428	0.261861	0.793428	15	14	0.813179		258	177	72	1.44024	0.149801	1.44024	0.149801	15	14	0.158309		251	184	79	1.13473	0.256488	1.13473	0.256488	15	14	0.270299		229	206	101	0.174574
1257.59	7951.73	237	198	93	0.523723	0.600472	0.523723	0.600472	15	14	0.620867		231	204	99	0.261861	0.793428	0.261861	0.793428	15	14	0.813179		260	175	70	1.52753	0.126631	1.52753	0.126631	15	14	0.1337		253	182	77	1.22202	0.221701	1.22202	0.221701	15	14	0.234007		230	205	100	0.218218
1259.52	7939.55	237	198	93	0.523723	0.600472	0.523723	0.600472	15	14	0.620867		231	204	99	0.261861	0.793428	0.261861	0.793428	15	14	0.813179		260	175	70	1.52753	0.126631	1.52753	0.126631	15	14	0.1337		251	184	79	1.13473	0.256488	1.13473	0.256488	15	14	0.270299		232	203	98	0.305505
1261.45	7927.41	238	197	92	0.567367	0.570466	0.567367	0.570466	15	14	0.590745		231	204	99	0.261861	0.793428	0.261861	0.793428	15	14	0.813179		260	175	70	1.52753	0.126631	1.52753	0.126631	15	14	0.1337		250	185	80	1.09109	0.275234	1.09109	0.275234	15	14	0.289776		232	203	98	0.305505
1263.37	7915.31	239	196	91	0.61101	0.541193	0.61101	0.541193	15	14	0.561291		234	201	96	0.392792	0.694473	0.392792	0.694473	15	14	0.71483		260	175	70	1.52753	0.126631	1.52753	0.126631	15	14	0.1337		251	184	79	1.13473	0.256488	1.13473	0.256488	15	14	0.270299		230	205	100	0.218218
1265.3	7903.24	239	196	91	0.61101	0.541193	0.61101	0.541193	15	14	0.561291		235	200	95	0.436436	0.662521	0.436436	0.662521	15	14	0.682954		259	176	71	1.48388	0.137841	1.48388	0.137841	15	14	0.145619		251	184	79	1.13473	0.256488	1.13473	0.256488	15	14	0.270299		228	207	102	0.130931
1267.23	7891.21	241	194	89	0.698297	0.484992	0.698297	0.484992	15	14	0.504539		236	199	94	0.480079	0.631171	0.480079	0.631171	15	14	0.651619		257	178	73	1.39659	0.162537	1.39659	0.162537	15	14	0.171789		254	181	76	1.26566	0.205634	1.26566	0.205634	15	14	0.217176		228	207	102	0.130931
1269.16	7879.22	242	193	88	0.741941	0.458124	0.741941	0.458124	15	14	0.477307		238	197	92	0.567367	0.570466	0.567367	0.570466	15	14	0.590745		257	178	73	1.39659	0.162537	1.39659	0.162537	15	14	0.171789		253	182	77	1.22202	0.221701	1.22202	0.221701	15	14	0.234007		226	209	104	0.0436436
1271.09	7867.27	240	195	90	0.654654	0.512691	0.654654	0.512691	15	14	0.532545		238	197	92	0.567367	0.570466	0.567367	0.570466	15	14	0.590745		257	178	73	1.39659	0.162537	1.39659	0.162537	15	14	0.171789		253	182	77	1.22202	0.221701	1.22202	0.221701	15	14	0.234007		224	211	104	-0.0436436
1273.02	7855.35	239	196	91	0.61101	0.541193	0.61101	0.541193	15	14	0.561291		235	200	95	0.436436	0.662521	0.436436	0.662521	15	14	0.682954		257	178	73	1.39659	0.162537	1.39659	0.162537	15	14	0.171789		254	181	76	1.26566	0.205634	1.26566	0.205634	15	14	0.217176		225	210	105	0
1274.95	7843.46	239	196	91	0.61101	0.541193	0.61101	0.541193	15	14	0.561291		236	199	94	0.480079	0.631171	0.480079	0.631171	15	14	0.651619		257	178	73	1.39659	0.162537	1.39659	0.162537	15	14	0.171789		255	180	75	1.30931	0.190431	1.30931	0.190431	15	14	0.201205		225	210	105	0
1276.88	7831.61	240	195	90	0.654654	0.512691	0.654654	0.512691	15	14	0.532545		238	197	92	0.567367	0.570466	0.567367	0.570466	15	14	0.590745		257	178	73	1.39659	0.162537	1.39659	0.162537	15	14	0.171789		254	181	76	1.26566	0.205634	1.26566	0.205634	15	14	0.217176		225	210	105	0
1278.81	7819.8	241	194	89	0.698297	0.484992	0.698297	0.484992	15	14	0.504539		238	197	92	0.567367	0.570466	0.567367	0.570466	15	14	0.590745		258	177	72	1.44024	0.149801	1.44024	0.149801	15	14	0.158309		255	180	75	1.30931	0.190431	1.30931	0.190431	15	14	0.201205		225	210	105	0
1280.73	7808.02	243	192	87	0.785584	0.432112	0.785584	0.432112	15	14	0.450872		237	198	93	0.523723	0.600472	0.523723	0.600472	15	14	0.620867		258	177	72	1.44024	0.149801	1.44024	0.149801	15	14	0.158309		257	178	73	1.39659	0.162537	1.39659	0.162537	15	14	0.171789		225	210	105	0
1282.66	7796.28	243	192	87	0.785584	0.432112	0.785584	0.432112	15	14	0.450872		237	198	93	0.523723	0.600472	0.523723	0.600472	15	14	0.620867		258	177	72	1.44024	0.149801	1.44024	0.149801	15	14	0.158309		256	179	74	1.35295	0.176072	1.35295	0.176072	15	14	0.186083		225	210	105	0
1284.59	7784.58	242	193	88	0.741941	0.458124	0.741941	0.458124	15	14	0.477307		237	198	93	0.523723	0.600472	0.523723	0.600472	15	14	0.620867		257	178	73	1.39659	0.162537	1.39659	0.162537	15	14	0.171789		256	179	74	1.35295	0.176072	1.35295	0.176072	15	14	0.186083		225	210	105	0
1286.52	7772.91	242	193	88	0.741941	0.458124	0.741941	0.458124	15	14	0.477307		238	197	92	0.567367	0.570466	0.567367	0.570466	15	14	0.590745		257	178	73	1.39659	0.162537	1.39659	0.162537	15	14	0.171789		256	179	74	1.35295	0.176072	1.35295	0.176072	15	14	0.186083		225	210	105	0
1288.45	7761.27	241	194	89	0.698297	0.484992	0.698297	0.484992	15	14	0.504539		239	196	91	0.61101	0.541193	0.61101	0.541193	15	14	0.561291		257	178	73	1.39659	0.162537	1.39659	0.162537	15	14	0.171789		255	180	75	1.30931	0.190431	1.30931	0.190431	15	14	0.201205		225	210	105	0
1290.38	7749.67	240	195	90	0.654654	0.512691	0.654654	0.512691	15	14	0.532545		237	198	93	0.523723	0.600472	0.523723	0.600472	15	14	0.620867		257	178	73	1.39659	0.162537	1.39659	0.162537	15	14	0.171789		253	182	77	1.22202	0.221701	1.22202	0.221701	15	14	0.234007		224	211	104	-0.0436436
1292.31	7738.1	241	194	89	0.698297	0.484992	0.698297	0.484992	15	14	0.504539		237	198	93	0.523723	0.600472	0.523723	0.600472	15	14	0.620867		256	179	74	1.35295	0.176072	1.35295	0.176072	15	14	0.186083		252	183	78	1.17838	0.238647	1.17838	0.238647	15	14	0.251712		225	210	105	0
1294.24	7726.57	241	194	89	0.698297	0.484992	0.698297	0.484992	15	14	0.504539		237	198	93	0.523723	0.600472	0.523723	0.600472	15	14	0.620867		258	177	72	1.44024	0.149801	1.44024	0.149801	15	14	0.158309		253	182	77	1.22202	0.221701	1.22202	0.221701	15	14	0.234007		225	210	105	0
1296.16	7715.07	241	194	89	0.698297	0.484992	0.698297	0.484992	15	14	0.504539		237	198	93	0.523723	0.600472	0.523723	0.600472	15	14	0.620867		258	177	72	1.44024	0.149801	1.44024	0.149801	15	14	0.158309		253	182	77	1.22202	0.221701	1.22202	0.221701	15	14	0.234007		225	210	105	0
1298.09	7703.61	244	191	86	0.829228	0.406976	0.829228	0.406976	15	14	0.425262		237	198	93	0.523723	0.600472	0.523723	0.600472	15	14	0.620867		258	177	72	1.44024	0.149801	1.44024	0.149801	15	14	0.158309		255	180	75	1.30931	0.190431	1.30931	0.190431	15	14	0.201205		225	210	105	0
1300.02	7692.18	244	191	86	0.829228	0.406976	0.829228	0.406976	15	14	0.425262		238	197	92	0.567367	0.570466	0.567367	0.570466	15	14	0.590745		257	178	73	1.39659	0.162537	1.39659	0.162537	15	14	0.171789		256	179	74	1.35295	0.176072	1.35295	0.176072	15	14	0.186083		225	210	105	0
1301.95	7680.78	244	191	86	0.829228	0.406976	0.829228	0.406976	15	14	0.425262		239	196	91	0.61101	0.541193	0.61101	0.541193	15	14	0.561291		257	178	73	1.39659	0.162537	1.39659	0.162537	15	14	0.171789		256	179	74	1.35295	0.176072	1.35295	0.176072	15	14	0.186083		225	210	105	0
1303.88	7669.42	244	191	86	0.829228	0.406976	0.829228	0.406976	15	14	0.425262		238	197	92	0.567367	0.570466	0.567367	0.570466	15	14	0.590745		258	177	72	1.44024	0.149801	1.44024	0.149801	15	14	0.158309		256	179	74	1.35295	0.176072	1.35295	0.176072	15	14	0.186083		225	210	105	0
1305.81	7658.09	245	190	85	0.872872	0.382734	0.872872	0.382734	15	14	0.400494		239	196	91	0.61101	0.541193	0.61101	0.541193	15	14	0.561291		257	178	73	1.39659	0.162537	1.39659	0.162537	15	14	0.171789		256	179	74	1.35295	0.176072	1.35295	0.176072	15	14	0.186083		225	210	105	0
1307.74	7646.8	244	191	86	0.829228	0.406976	0.829228	0.406976	15	14	0.425262		239	196	91	0.61101	0.541193	0.61101	0.541193	15	14	0.561291		257	178	73	1.39659	0.162537	1.39659	0.162537	15	14	0.171789		255	180	75	1.30931	0.190431	1.30931	0.190431	15	14	0.201205		225	210	105	0
1309.67	7635.53	244	191	86	0.829228	0.406976	0.829228	0.406976	15	14	0.425262		238	197	92	0.567367	0.570466	0.567367	0.570466	15	14	0.590745		257	178	73	1.39659	0.162537	1.39659	0.162537	15	14	0.171789		255	180	75	1.30931	0.190431	1.30931	0.190431	15	14	0.201205		225	210	105	0
1311.59	7624.31	243	192	87	0.785584	0.432112	0.785584	0.432112	15	14	0.450872		238	197	92	0.567367	0.570466	0.567367	0.570466	15	14	0.590745		255	180	75	1.30931	0.190431	1.30931	0.190431	15	14	0.201205		257	178	73	1.39659	0.162537	1.39659	0.162537	15	14	0.171789		227	208	103	0.0872872
1313.52	7613.11	243	192	87	0.785584	0.432112	0.785584	0.432112	15	14	0.450872		237	198	93	0.523723	0.600472	0.523723	0.600472	15	14	0.620867		256	179	74	1.35295	0.176072	1.35295	0.176072	15	14	0.186083		256	179	74	1.35295	0.176072	1.35295	0.176072	15	14	0.186083		226	209	104	0.0436436
1315.45	7601.95	243	192	87	0.785584	0.432112	0.785584	0.432112	15	14	0.450872		239	196	91	0.61101	0.541193	0.61101	0.541193	15	14	0.561291		257	178	73	1.39659	0.162537	1.39659	0.162537	15	14	0.171789		255	180	75	1.30931	0.190431	1.30931	0.190431	15	14	0.201205		225	210	105	0
1317.38	7590.82	241	194	89	0.698297	0.484992	0.698297	0.484992	15	14	0.504539		239	196	91	0.61101	0.541193	0.61101	0.541193	15	14	0.561291		257	178	73	1.39659	0.162537	1.39659	0.162537	15	14	0.171789		256	179	74	1.35295	0.176072	1.35295	0.176072	15	14	0.186083		225	210	105	0
1319.31	7579.72	243	192	87	0.785584	0.432112	0.785584	0.432112	15	14	0.450872		238	197	92	0.567367	0.570466	0.567367	0.570466	15	14	0.590745		257	178	73	1.39659	0.162537	1.39659	0.162537	15	14	0.171789		257	178	73	1.39659	0.162537	1.39659	0.162537	15	14	0.171789		225	210	105	0
1321.24	7568.65	244	191	86	0.829228	0.406976	0.829228	0.406976	15	14	0.425262		237	198	93	0.523723	0.600472	0.523723	0.600472	15	14	0.620867		257	178	73	1.39659	0.162537	1.39659	0.162537	15	14	0.171789		256	179	74	1.35295	0.176072	1.35295	0.176072	15	14	0.186083		225	210	105	0
1323.17	7557.62	242	193	88	0.741941	0.458124	0.741941	0.458124	15	14	0.477307		239	196	91	0.61101	0.541193	0.61101	0.541193	15	14	0.561291		258	177	72	1.44024	0.149801	1.44024	0.149801	15	14	0.158309		256	179	74	1.35295	0.176072	1.35295	0.176072	15	14	0.186083		225	210	105	0
1325.1	7546.62	243	192	87	0.785584	0.432112	0.785584	0.432112	15	14	0.450872		236	199	94	0.480079	0.631171	0.480079	0.631171	15	14	0.651619		258	177	72	1.44024	0.149801	1.44024	0.149801	15	14	0.158309		255	180	75	1.30931	0.190431	1.30931	0.190431	15	14	0.201205		225	210	105	0
1327.03	7535.65	245	190	85	0.872872	0.382734	0.872872	0.382734	15	14	0.400494		238	197	92	0.567367	0.570466	0.567367	0.570466	15	14	0.590745		257	178	73	1.39659	0.162537	1.39659	0.162537	15	14	0.171789		256	179	74	1.35295	0.176072	1.35295	0.176072	15	14	0.186083		225	210	105	0
1328.95	7524.71	246	189	84	0.916515	0.359397	0.916515	0.359397	15	14	0.376588		239	196	91	0.61101	0.541193	0.61101	0.541193	15	14	0.561291		257	178	73	1.39659	0.162537	1.39659	0.162537	15	14	0.171789		255	180	75	1.30931	0.190431	1.30931	0.190431	15	14	0.201205		227	208	103	0.0872872
1330.88	7513.81	246	189	84	0.916515	0.359397	0.916515	0.359397	15	14	0.376588		239	196	91	0.61101	0.541193	0.61101	0.541193	15	14	0.561291		257	178	73	1.39659	0.162537	1.39659	0.162537	15	14	0.171789		257	178	73	1.39659	0.162537	1.39659	0.162537	15	14	0.171789		227	208	103	0.0872872
1332.81	7502.93	245	190	85	0.872872	0.382734	0.872872	0.382734	15	14	0.400494		238	197	92	0.567367	0.570466	0.567367	0.570466	15	14	0.590745		257	178	73	1.39659	0.162537	1.39659	0.162537	15	14	0.171789		256	179	74	1.35295	0.176072	1.35295	0.176072	15	14	0.186083		227	208	103	0.0872872
1334.74	7492.09	243	192	87	0.785584	0.432112	0.785584	0.432112	15	14	0.450872		239	196	91	0.61101	0.541193	0.61101	0.541193	15	14	0.561291		257	178	73	1.39659	0.162537	1.39659	0.162537	15	14	0.171789		256	179	74	1.35295	0.176072	1.35295	0.176072	15	14	0.186083		227	208	103	0.0872872
1336.67	7481.28	242	193	88	0.741941	0.458124	0.741941	0.458124	15	14	0.477307		239	196	91	0.61101	0.541193	0.61101	0.541193	15	14	0.561291		258	177	72	1.44024	0.149801	1.44024	0.149801	15	14	0.158309		257	178	73	1.39659	0.162537	1.39659	0.162537	15	14	0.171789		228	207	102	0.130931
1338.6	7470.5	243	192	87	0.785584	0.432112	0.785584	0.432112	15	14	0.450872		240	195	90	0.654654	0.512691	0.654654	0.512691	15	14	0.532545		259	176	71	1.48388	0.137841	1.48388	0.137841	15	14	0.145619		257	178	73	1.39659	0.162537	1.39659	0.162537	15	14	0.171789		227	208	103	0.0872872
1340.53	7459.75	241	194	89	0.698297	0.484992	0.698297	0.484992	15	14	0.504539		239	196	91	0.61101	0.541193	0.61101	0.541193	15	14	0.561291		257	178	73	1.39659	0.162537	1.39659	0.162537	15	14	0.171789		256	179	74	1.35295	0.176072	1.35295	0.176072	15	14	0.186083		225	210	105	0
1342.46	7449.03	243	192	87	0.785584	0.432112	0.785584	0.432112	15	14	0.450872		239	196	91	0.61101	0.541193	0.61101	0.541193	15	14	0.561291		257	178	73	1.39659	0.162537	1.39659	0.162537	15	14	0.171789		255	180	75	1.30931	0.190431	1.30931	0.190431	15	14	0.201205		225	210	105	0
1344.38	7438.35	242	193	88	0.741941	0.458124	0.741941	0.458124	15	14	0.477307		239	196	91	0.61101	0.541193	0.61101	0.541193	15	14	0.561291		254	181	76	1.26566	0.205634	1.26566	0.205634	15	14	0.217176		256	179	74	1.35295	0.176072	1.35295	0.176072	15	14	0.186083		227	208	103	0.0872872
1346.31	7427.69	240	195	90	0.654654	0.512691	0.654654	0.512691	15	14	0.532545		238	197	92	0.567367	0.570466	0.567367	0.570466	15	14	0.590745		256	179	74	1.35295	0.176072	1.35295	0.176072	15	14	0.186083		256	179	74	1.35295	0.176072	1.35295	0.176072	15	14	0.186083		227	208	103	0.0872872
1348.24	7417.06	240	195	90	0.654654	0.512691	0.654654	0.512691	15	14	0.532545		239	196	91	0.61101	0.541193	0.61101	0.541193	15	14	0.561291		256	179	74	1.35295	0.176072	1.35295	0.176072	15	14	0.186083		256	179	74	1.35295	0.176072	1.35295	0.176072	15	14	0.186083		227	208	103	0.0872872
1350.17	7406.47	240	195	90	0.654654	0.512691	0.654654	0.512691	15	14	0.532545		240	195	90	0.654654	0.512691	0.654654	0.512691	15	14	0.532545		257	178	73	1.39659	0.162537	1.39659	0.162537	15	14	0.171789		256	179	74	1.35295	0.176072	1.35295	0.176072	15	14	0.186083		226	209	104	0.0436436
1352.1	7395.9	240	195	90	0.654654	0.512691	0.654654	0.512691	15	14	0.532545		239	196	91	0.61101	0.541193	0.61101	0.541193	15	14	0.561291		256	179	74	1.35295	0.176072	1.35295	0.176072	15	14	0.186083		256	179	74	1.35295	0.176072	1.35295	0.176072	15	14	0.186083		226	209	104	0.0436436
1354.03	7385.37	241	194	89	0.698297	0.484992	0.698297	0.484992	15	14	0.504539		239	196	91	0.61101	0.541193	0.61101	0.541193	15	14	0.561291		256	179	74	1.35295	0.176072	1.35295	0.176072	15	14	0.186083		256	179	74	1.35295	0.176072	1.35295	0.176072	15	14	0.186083		226	209	104	0.0436436
1355.96	7374.86	241	194	89	0.698297	0.484992	0.698297	0.484992	15	14	0.504539		239	196	91	0.61101	0.541193	0.61101	0.541193	15	14	0.561291		257	178	73	1.39659	0.162537	1.39659	0.162537	15	14	0.171789		255	180	75	1.30931	0.190431	1.30931	0.190431	15	14	0.201205		227	208	103	0.0872872
1357.89	7364.39	241	194	89	0.698297	0.484992	0.698297	0.484992	15	14	0.504539		239	196	91	0.61101	0.541193	0.61101	0.541193	15	14	0.561291		256	179	74	1.35295	0.176072	1.35295	0.176072	15	14	0.186083		256	179	74	1.35295	0.176072	1.35295	0.176072	15	14	0.186083		226	209	104	0.0436436
1359.82	7353.94	239	196	91	0.61101	0.541193	0.61101	0.541193	15	14	0.561291		238	197	92	0.567367	0.570466	0.567367	0.570466	15	14	0.590745		255	180	75	1.30931	0.190431	1.30931	0.190431	15	14	0.201205		257	178	73	1.39659	0.162537	1.39659	0.162537	15	14	0.171789		229	206	101	0.174574
1361.74	7343.52	240	195	90	0.654654	0.512691	0.654654	0.512691	15	14	0.532545		238	197	92	0.567367	0.570466	0.567367	0.570466	15	14	0.590745		256	179	74	1.35295	0.176072	1.35295	0.176072	15	14	0.186083		258	177	72	1.44024	0.149801	1.44024	0.149801	15	14	0.158309		230	205	100	0.218218
1363.67	7333.14	239	196	91	0.61101	0.541193	0.61101	0.541193	15	14	0.561291		238	197	92	0.567367	0.570466	0.567367	0.570466	15	14	0.590745		257	178	73	1.39659	0.162537	1.39659	0.162537	15	14	0.171789		258	177	72	1.44024	0.149801	1.44024	0.149801	15	14	0.158309		228	207	102	0.130931
1365.6	7322.78	239	196	91	0.61101	0.541193	0.61101	0.541193	15	14	0.561291		238	197	92	0.567367	0.570466	0.567367	0.570466	15	14	0.590745		256	179	74	1.35295	0.176072	1.35295	0.176072	15	14	0.186083		257	178	73	1.39659	0.162537	1.39659	0.162537	15	14	0.171789		229	206	101	0.174574
1367.53	7312.45	240	195	90	0.654654	0.512691	0.654654	0.512691	15	14	0.532545		240	195	90	0.654654	0.512691	0.654654	0.512691	15	14	0.532545		256	179	74	1.35295	0.176072	1.35295	0.176072	15	14	0.186083		260	175	70	1.52753	0.126631	1.52753	0.126631	15	14	0.1337		229	206	101	0.174574
1369.46	7302.15	241	194	89	0.698297	0.484992	0.698297	0.484992	15	14	0.504539		240	195	90	0.654654	0.512691	0.654654	0.512691	15	14	0.532545		255	180	75	1.30931	0.190431	1.30931	0.190431	15	14	0.201205		260	175	70	1.52753	0.126631	1.52753	0.126631	15	14	0.1337		228	207	102	0.130931
1371.39	7291.88	241	194	89	0.698297	0.484992	0.698297	0.484992	15	14	0.504539		238	197	92	0.567367	0.570466	0.567367	0.570466	15	14	0.590745		255	180	75	1.30931	0.190431	1.30931	0.190431	15	14	0.201205		259	176	71	1.48388	0.137841	1.48388	0.137841	15	14	0.145619		229	206	101	0.174574
1373.32	7281.64	240	195	90	0.654654	0.512691	0.654654	0.512691	15	14	0.532545		241	194	89	0.698297	0.484992	0.698297	0.484992	15	14	0.504539		255	180	75	1.30931	0.190431	1.30931	0.190431	15	14	0.201205		259	176	71	1.48388	0.137841	1.48388	0.137841	15	14	0.145619		228	207	102	0.130931
1375.25	7271.43	238	197	92	0.567367	0.570466	0.567367	0.570466	15	14	0.590745		238	197	92	0.567367	0.570466	0.567367	0.570466	15	14	0.590745		252	183	78	1.17838	0.238647	1.17838	0.238647	15	14	0.251712		262	173	68	1.61481	0.106352	1.61481	0.106352	15	14	0.11207		231	204	99	0.261861
1377.17	7261.24	239	196	91	0.61101	0.541193	0.61101	0.541193	15	14	0.561291		239	196	91	0.61101	0.541193	0.61101	0.541193	15	14	0.561291		256	179	74	1.35295	0.176072	1.35295	0.176072	15	14	0.186083		259	176	71	1.48388	0.137841	1.48388	0.137841	15	14	0.145619		228	207	102	0.130931
1379.1	7251.09	240	195	90	0.654654	0.512691	0.654654	0.512691	15	14	0.532545		239	196	91	0.61101	0.541193	0.61101	0.541193	15	14	0.561291		257	178	73	1.39659	0.162537	1.39659	0.162537	15	14	0.171789		259	176	71	1.48388	0.137841	1.48388	0.137841	15	14	0.145619		228	207	102	0.130931
1381.03	7240.96	240	195	90	0.654654	0.512691	0.654654	0.512691	15	14	0.532545		238	197	92	0.567367	0.570466	0.567367	0.570466	15	14	0.590745		256	179	74	1.35295	0.176072	1.35295	0.176072	15	14	0.186083		260	175	70	1.52753	0.126631	1.52753	0.126631	15	14	0.1337		227	208	103	0.0872872
1382.96	7230.86	240	195	90	0.654654	0.512691	0.654654	0.512691	15	14	0.532545		237	198	93	0.523723	0.600472	0.523723	0.600472	15	14	0.620867		255	180	75	1.30931	0.190431	1.30931	0.190431	15	14	0.201205		260	175	70	1.52753	0.126631	1.52753	0.126631	15	14	0.1337		226	209	104	0.0436436
1384.89	7220.79	241	194	89	0.698297	0.484992	0.698297	0.484992	15	14	0.504539		240	195	90	0.654654	0.512691	0.654654	0.512691	15	14	0.532545		256	179	74	1.35295	0.176072	1.35295	0.176072	15	14	0.186083		260	175	70	1.52753	0.126631	1.52753	0.126631	15	14	0.1337		228	207	102	0.130931
1386.82	7210.75	240	195	90	0.654654	0.512691	0.654654	0.512691	15	14	0.532545		238	197	92	0.567367	0.570466	0.567367	0.570466	15	14	0.590745		256	179	74	1.35295	0.176072	1.35295	0.176072	15	14	0.186083		262	173	68	1.61481	0.106352	1.61481	0.106352	15	14	0.11207		230	205	100	0.218218
1388.75	7200.73	239	196	91	0.61101	0.541193	0.61101	0.541193	15	14	0.561291		238	197	92	0.567367	0.570466	0.567367	0.570466	15	14	0.590745		254	181	76	1.26566	0.205634	1.26566	0.205634	15	14	0.217176		261	174	69	1.57117	0.116144	1.57117	0.116144	15	14	0.122524		230	205	100	0.218218
1390.68	7190.75	239	196	91	0.61101	0.541193	0.61101	0.541193	15	14	0.561291		239	196	91	0.61101	0.541193	0.61101	0.541193	15	14	0.561291		256	179	74	1.35295	0.176072	1.35295	0.176072	15	14	0.186083		260	175	70	1.52753	0.126631	1.52753	0.126631	15	14	0.1337		229	206	101	0.174574
1392.61	7180.79	241	194	89	0.698297	0.484992	0.698297	0.484992	15	14	0.504539		240	195	90	0.654654	0.512691	0.654654	0.512691	15	14	0.532545		259	176	71	1.48388	0.137841	1.48388	0.137841	15	14	0.145619		261	174	69	1.57117	0.116144	1.57117	0.116144	15	14	0.122524		228	207	102	0.130931
1394.53	7170.85	239	196	91	0.61101	0.541193	0.61101	0.541193	15	14	0.561291		239	196	91	0.61101	0.541193	0.61101	0.541193	15	14	0.561291		258	177	72	1.44024	0.149801	1.44024	0.149801	15	14	0.158309		264	171	66	1.7021	0.0887377	1.7021	0.0887377	15	14	0.0932157		230	205	100	0.218218
1396.46	7160.95	239	196	91	0.61101	0.541193	0.61101	0.541193	15	14	0.561291		239	196	91	0.61101	0.541193	0.61101	0.541193	15	14	0.561291		256	179	74	1.35295	0.176072	1.35295	0.176072	15	14	0.186083		262	173	68	1.61481	0.106352	1.61481	0.106352	15	14	0.11207		229	206	101	0.174574
1398.39	7151.07	240	195	90	0.654654	0.512691	0.654654	0.512691	15	14	0.532545		239	196	91	0.61101	0.541193	0.61101	0.541193	15	14	0.561291		257	178	73	1.39659	0.162537	1.39659	0.162537	15	14	0.171789		262	173	68	1.61481	0.106352	1.61481	0.106352	15	14	0.11207		230	205	100	0.218218
1400.32	7141.22	240	195	90	0.654654	0.512691	0.654654	0.512691	15	14	0.532545		238	197	92	0.567367	0.570466	0.567367	0.570466	15	14	0.590745		256	179	74	1.35295	0.176072	1.35295	0.176072	15	14	0.186083		262	173	68	1.61481	0.106352	1.61481	0.106352	15	14	0.11207		230	205	100	0.218218
1402.25	7131.4	239	196	91	0.61101	0.541193	0.61101	0.541193	15	14	0.561291		239	196	91	0.61101	0.541193	0.61101	0.541193	15	14	0.561291		257	178	73	1.39659	0.162537	1.39659	0.162537	15	14	0.171789		260	175	70	1.52753	0.126631	1.52753	0.126631	15	14	0.1337		230	205	100	0.218218
1404.18	7121.6	239	196	91	0.61101	0.541193	0.61101	0.541193	15	14	0.561291		237	198	93	0.523723	0.600472	0.523723	0.600472	15	14	0.620867		257	178	73	1.39659	0.162537	1.39659	0.162537	15	14	0.171789		261	174	69	1.57117	0.116144	1.57117	0.116144	15	14	0.122524		230	205	100	0.218218
1406.11	7111.83	238	197	92	0.567367	0.570466	0.567367	0.570466	15	14	0.590745		240	195	90	0.654654	0.512691	0.654654	0.512691	15	14	0.532545		255	180	75	1.30931	0.190431	1.30931	0.190431	15	14	0.201205		262	173	68	1.61481	0.106352	1.61481	0.106352	15	14	0.11207		229	206	101	0.174574
1408.04	7102.09	240	195	90	0.654654	0.512691	0.654654	0.512691	15	14	0.532545		241	194	89	0.698297	0.484992	0.698297	0.484992	15	14	0.504539		256	179	74	1.35295	0.176072	1.35295	0.176072	15	14	0.186083		263	172	67	1.65846	0.0972264	1.65846	0.0972264	15	14	0.102309		229	206	101	0.174574
1409.96	7092.38	241	194	89	0.698297	0.484992	0.698297	0.484992	15	14	0.504539		238	197	92	0.567367	0.570466	0.567367	0.570466	15	14	0.590745		257	178	73	1.39659	0.162537	1.39659	0.162537	15	14	0.171789		262	173	68	1.61481	0.106352	1.61481	0.106352	15	14	0.11207		228	207	102	0.130931
1411.89	7082.69	241	194	89	0.698297	0.484992	0.698297	0.484992	15	14	0.504539		239	196	91	0.61101	0.541193	0.61101	0.541193	15	14	0.561291		255	180	75	1.30931	0.190431	1.30931	0.190431	15	14	0.201205		262	173	68	1.61481	0.106352	1.61481	0.106352	15	14	0.11207		229	206	101	0.174574
1413.82	7073.03	240	195	90	0.654654	0.512691	0.654654	0.512691	15	14	0.532545		241	194	89	0.698297	0.484992	0.698297	0.484992	15	14	0.504539		257	178	73	1.39659	0.162537	1.39659	0.162537	15	14	0.171789		263	172	67	1.65846	0.0972264	1.65846	0.0972264	15	14	0.102309		230	205	100	0.218218
1415.75	7063.39	242	193	88	0.741941	0.458124	0.741941	0.458124	15	14	0.477307		242	193	88	0.741941	0.458124	0.741941	0.458124	15	14	0.477307		259	176	71	1.48388	0.137841	1.48388	0.137841	15	14	0.145619		264	171	66	1.7021	0.0887377	1.7021	0.0887377	15	14	0.0932157		232	203	98	0.305505
1417.68	7053.78	243	192	87	0.785584	0.432112	0.785584	0.432112	15	14	0.450872		239	196	91	0.61101	0.541193	0.61101	0.541193	15	14	0.561291		261	174	69	1.57117	0.116144	1.57117	0.116144	15	14	0.122524		265	170	65	1.74574	0.0808565	1.74574	0.0808565	15	14	0.0847612		232	203	98	0.305505
1419.61	7044.2	240	195	90	0.654654	0.512691	0.654654	0.512691	15	14	0.532545		239	196	91	0.61101	0.541193	0.61101	0.541193	15	14	0.561291		257	178	73	1.39659	0.162537	1.39659	0.162537	15	14	0.171789		262	173	68	1.61481	0.106352	1.61481	0.106352	15	14	0.11207		231	204	99	0.261861
1421.54	7034.64	241	194	89	0.698297	0.484992	0.698297	0.484992	15	14	0.504539		242	193	88	0.741941	0.458124	0.741941	0.458124	15	14	0.477307		259	176	71	1.48388	0.137841	1.48388	0.137841	15	14	0.145619		262	173	68	1.61481	0.106352	1.61481	0.106352	15	14	0.11207		231	204	99	0.261861
1423.47	7025.11	242	193	88	0.741941	0.458124	0.741941	0.458124	15	14	0.477307		241	194	89	0.698297	0.484992	0.698297	0.484992	15	14	0.504539		259	176	71	1.48388	0.137841	1.48388	0.137841	15	14	0.145619		264	171	66	1.7021	0.0887377	1.7021	0.0887377	15	14	0.0932157		233	202	97	0.349149
1425.4	7015.6	242	193	88	0.741941	0.458124	0.741941	0.458124	15	14	0.477307		242	193	88	0.741941	0.458124	0.741941	0.458124	15	14	0.477307		258	177	72	1.44024	0.149801	1.44024	0.149801	15	14	0.158309		262	173	68	1.61481	0.106352	1.61481	0.106352	15	14	0.11207		230	205	100	0.218218
1427.32	7006.12	243	192	87	0.785584	0.432112	0.785584	0.432112	15	14	0.450872		241	194	89	0.698297	0.484992	0.698297	0.484992	15	14	0.504539		258	177	72	1.44024	0.149801	1.44024	0.149801	15	14	0.158309		264	171	66	1.7021	0.0887377	1.7021	0.0887377	15	14	0.0932157		230	205	100	0.218218
1429.25	6996.66	243	192	87	0.785584	0.432112	0.785584	0.432112	15	14	0.450872		241	194	89	0.698297	0.484992	0.698297	0.484992	15	14	0.504539		257	178	73	1.39659	0.162537	1.39659	0.162537	15	14	0.171789		263	172	67	1.65846	0.0972264	1.65846	0.0972264	15	14	0.102309		229	206	101	0.174574
1431.18	6987.23	241	194	89	0.698297	0.484992	0.698297	0.484992	15	14	0.504539		237	198	93	0.523723	0.600472	0.523723	0.600472	15	14	0.620867		256	179	74	1.35295	0.176072	1.35295	0.176072	15	14	0.186083		262	173	68	1.61481	0.106352	1.61481	0.106352	15	14	0.11207		229	206	101	0.174574
1433.11	6977.83	241	194	89	0.698297	0.484992	0.698297	0.484992	15	14	0.504539		240	195	90	0.654654	0.512691	0.654654	0.512691	15	14	0.532545		257	178	73	1.39659	0.162537	1.39659	0.162537	15	14	0.171789		263	172	67	1.65846	0.0972264	1.65846	0.0972264	15	14	0.102309		230	205	100	0.218218
1435.04	6968.45	239	196	91	0.61101	0.541193	0.61101	0.541193	15	14	0.561291		240	195	90	0.654654	0.512691	0.654654	0.512691	15	14	0.532545		258	177	72	1.44024	0.149801	1.44024	0.149801	15	14	0.158309		264	171	66	1.7021	0.0887377	1.7021	0.0887377	15	14	0.0932157		233	202	97	0.349149
1436.97	6959.1	239	196	91	0.61101	0.541193	0.61101	0.541193	15	14	0.561291		242	193	88	0.741941	0.458124	0.741941	0.458124	15	14	0.477307		255	180	75	1.30931	0.190431	1.30931	0.190431	15	14	0.201205		263	172	67	1.65846	0.0972264	1.65846	0.0972264	15	14	0.102309		234	201	96	0.392792
1438.9	6949.77	241	194	89	0.698297	0.484992	0.698297	0.484992	15	14	0.504539		242	193	88	0.741941	0.458124	0.741941	0.458124	15	14	0.477307		256	179	74	1.35295	0.176072	1.35295	0.176072	15	14	0.186083		263	172	67	1.65846	0.0972264	1.65846	0.0972264	15	14	0.102309		232	203	98	0.305505
1440.83	6940.47	241	194	89	0.698297	0.484992	0.698297	0.484992	15	14	0.504539		242	193	88	0.741941	0.458124	0.741941	0.458124	15	14	0.477307		259	176	71	1.48388	0.137841	1.48388	0.137841	15	14	0.145619		263	172	67	1.65846	0.0972264	1.65846	0.0972264	15	14	0.102309		230	205	100	0.218218
1442.75	6931.19	241	194	89	0.698297	0.484992	0.698297	0.484992	15	14	0.504539		242	193	88	0.741941	0.458124	0.741941	0.458124	15	14	0.477307		258	177	72	1.44024	0.149801	1.44024	0.149801	15	14	0.158309		263	172	67	1.65846	0.0972264	1.65846	0.0972264	15	14	0.102309		230	205	100	0.218218
1444.68	6921.93	239	196	91	0.61101	0.541193	0.61101	0.541193	15	14	0.561291		242	193	88	0.741941	0.458124	0.741941	0.458124	15	14	0.477307		258	177	72	1.44024	0.149801	1.44024	0.149801	15	14	0.158309		264	171	66	1.7021	0.0887377	1.7021	0.0887377	15	14	0.0932157		231	204	99	0.261861
1446.61	6912.7	239	196	91	0.61101	0.541193	0.61101	0.541193	15	14	0.561291		242	193	88	0.741941	0.458124	0.741941	0.458124	15	14	0.477307		260	175	70	1.52753	0.126631	1.52753	0.126631	15	14	0.1337		263	172	67	1.65846	0.0972264	1.65846	0.0972264	15	14	0.102309		231	204	99	0.261861
1448.54	6903.5	241	194	89	0.698297	0.484992	0.698297	0.484992	15	14	0.504539		242	193	88	0.741941	0.458124	0.741941	0.458124	15	14	0.477307		259	176	71	1.48388	0.137841	1.48388	0.137841	15	14	0.145619		265	170	65	1.74574	0.0808565	1.74574	0.0808565	15	14	0.0847612		230	205	100	0.218218
1450.47	6894.32	240	195	90	0.654654	0.512691	0.654654	0.512691	15	14	0.532545		242	193	88	0.741941	0.458124	0.741941	0.458124	15	14	0.477307		259	176	71	1.48388	0.137841	1.48388	0.137841	15	14	0.145619		265	170	65	1.74574	0.0808565	1.74574	0.0808565	15	14	0.0847612		231	204	99	0.261861
1452.4	6885.16	238	197	92	0.567367	0.570466	0.567367	0.570466	15	14	0.590745		243	192	87	0.785584	0.432112	0.785584	0.432112	15	14	0.450872		259	176	71	1.48388	0.137841	1.48388	0.137841	15	14	0.145619		264	171	66	1.7021	0.0887377	1.7021	0.0887377	15	14	0.0932157		232	203	98	0.305505
1454.33	6876.03	238	197	92	0.567367	0.570466	0.567367	0.570466	15	14	0.590745		240	195	90	0.654654	0.512691	0.654654	0.512691	15	14	0.532545		259	176	71	1.48388	0.137841	1.48388	0.137841	15	14	0.145619		264	171	66	1.7021	0.0887377	1.7021	0.0887377	15	14	0.0932157		232	203	98	0.305505
1456.26	6866.92	241	194	89	0.698297	0.484992	0.698297	0.484992	15	14	0.504539		240	195	90	0.654654	0.512691	0.654654	0.512691	15	14	0.532545		259	176	71	1.48388	0.137841	1.48388	0.137841	15	14	0.145619		264	171	66	1.7021	0.0887377	1.7021	0.0887377	15	14	0.0932157		237	198	93	0.523723
1458.18	6857.84	241	194	89	0.698297	0.484992	0.698297	0.484992	15	14	0.504539		240	195	90	0.654654	0.512691	0.654654	0.512691	15	14	0.532545		259	176	71	1.48388	0.137841	1.48388	0.137841	15	14	0.145619		261	174	69	1.57117	0.116144	1.57117	0.116144	15	14	0.122524		232	203	98	0.305505
1460.11	6848.78	240	195	90	0.654654	0.512691	0.654654	0.512691	15	14	0.532545		242	193	88	0.741941	0.458124	0.741941	0.458124	15	14	0.477307		262	173	68	1.61481	0.106352	1.61481	0.106352	15	14	0.11207		263	172	67	1.65846	0.0972264	1.65846	0.0972264	15	14	0.102309		232	203	98	0.305505
1462.04	6839.75	241	194	89	0.698297	0.484992	0.698297	0.484992	15	14	0.504539		241	194	89	0.698297	0.484992	0.698297	0.484992	15	14	0.504539		258	177	72	1.44024	0.149801	1.44024	0.149801	15	14	0.158309		266	169	64	1.78939	0.0735535	1.78939	0.0735535	15	14	0.076919		234	201	96	0.392792
1463.97	6830.73	240	195	90	0.654654	0.512691	0.654654	0.512691	15	14	0.532545		241	194	89	0.698297	0.484992	0.698297	0.484992	15	14	0.504539		261	174	69	1.57117	0.116144	1.57117	0.116144	15	14	0.122524		266	169	64	1.78939	0.0735535	1.78939	0.0735535	15	14	0.076919		234	201	96	0.392792
1465.9	6821.75	239	196	91	0.61101	0.541193	0.61101	0.541193	15	14	0.561291		240	195	90	0.654654	0.512691	0.654654	0.512691	15	14	0.532545		259	176	71	1.48388	0.137841	1.48388	0.137841	15	14	0.145619		264	171	66	1.7021	0.0887377	1.7021	0.0887377	15	14	0.0932157		232	203	98	0.305505
1467.83	6812.78	240	195	90	0.654654	0.512691	0.654654	0.512691	15	14	0.532545		242	193	88	0.741941	0.458124	0.741941	0.458124	15	14	0.477307		258	177	72	1.44024	0.149801	1.44024	0.149801	15	14	0.158309		264	171	66	1.7021	0.0887377	1.7021	0.0887377	15	14	0.0932157		232	203	98	0.305505
1469.76	6803.84	238	197	92	0.567367	0.570466	0.567367	0.570466	15	14	0.590745		240	195	90	0.654654	0.512691	0.654654	0.512691	15	14	0.532545		257	178	73	1.39659	0.162537	1.39659	0.162537	15	14	0.171789		264	171	66	1.7021	0.0887377	1.7021	0.0887377	15	14	0.0932157		233	202	97	0.349149
1471.69	6794.92	239	196	91	0.61101	0.541193	0.61101	0.541193	15	14	0.561291		238	197	92	0.567367	0.570466	0.567367	0.570466	15	14	0.590745		260	175	70	1.52753	0.126631	1.52753	0.126631	15	14	0.1337		265	170	65	1.74574	0.0808565	1.74574	0.0808565	15	14	0.0847612		232	203	98	0.305505
1473.62	6786.03	238	197	92	0.567367	0.570466	0.567367	0.570466	15	14	0.590745		239	196	91	0.61101	0.541193	0.61101	0.541193	15	14	0.561291		257	178	73	1.39659	0.162537	1.39659	0.162537	15	14	0.171789		263	172	67	1.65846	0.0972264	1.65846	0.0972264	15	14	0.102309		232	203	98	0.305505
1475.54	6777.16	240	195	90	0.654654	0.512691	0.654654	0.512691	15	14	0.532545		241	194	89	0.698297	0.484992	0.698297	0.484992	15	14	0.504539		259	176	71	1.48388	0.137841	1.48388	0.137841	15	14	0.145619		265	170	65	1.74574	0.0808565	1.74574	0.0808565	15	14	0.0847612		232	203	98	0.305505
1477.47	6768.31	240	195	90	0.654654	0.512691	0.654654	0.512691	15	14	0.532545		239	196	91	0.61101	0.541193	0.61101	0.541193	15	14	0.561291		260	175	70	1.52753	0.126631	1.52753	0.126631	15	14	0.1337		264	171	66	1.7021	0.0887377	1.7021	0.0887377	15	14	0.0932157		232	203	98	0.305505
1479.4	6759.49	242	193	88	0.741941	0.458124	0.741941	0.458124	15	14	0.477307		241	194	89	0.698297	0.484992	0.698297	0.484992	15	14	0.504539		259	176	71	1.48388	0.137841	1.48388	0.137841	15	14	0.145619		265	170	65	1.74574	0.0808565	1.74574	0.0808565	15	14	0.0847612		233	202	97	0.349149
1481.33	6750.69	240	195	90	0.654654	0.512691	0.654654	0.512691	15	14	0.532545		241	194	89	0.698297	0.484992	0.698297	0.484992	15	14	0.504539		259	176	71	1.48388	0.137841	1.48388	0.137841	15	14	0.145619		265	170	65	1.74574	0.0808565	1.74574	0.0808565	15	14	0.0847612		232	203	98	0.305505
1483.26	6741.91	239	196	91	0.61101	0.541193	0.61101	0.541193	15	14	0.561291		241	194	89	0.698297	0.484992	0.698297	0.484992	15	14	0.504539		259	176	71	1.48388	0.137841	1.48388	0.137841	15	14	0.145619		265	170	65	1.74574	0.0808565	1.74574	0.0808565	15	14	0.0847612		232	203	98	0.305505
1485.19	6733.15	242	193	88	0.741941	0.458124	0.741941	0.458124	15	14	0.477307		239	196	91	0.61101	0.541193	0.61101	0.541193	15	14	0.561291		257	178	73	1.39659	0.162537	1.39659	0.162537	15	14	0.171789		265	170	65	1.74574	0.0808565	1.74574	0.0808565	15	14	0.0847612		233	202	97	0.349149
1487.12	6724.42	241	194	89	0.698297	0.484992	0.698297	0.484992	15	14	0.504539		240	195	90	0.654654	0.512691	0.654654	0.512691	15	14	0.532545		259	176	71	1.48388	0.137841	1.48388	0.137841	15	14	0.145619		266	169	64	1.78939	0.0735535	1.78939	0.0735535	15	14	0.076919		235	200	95	0.436436
1489.05	6715.71	240	195	90	0.654654	0.512691	0.654654	0.512691	15	14	0.532545		239	196	91	0.61101	0.541193	0.61101	0.541193	15	14	0.561291		261	174	69	1.57117	0.116144	1.57117	0.116144	15	14	0.122524		266	169	64	1.78939	0.0735535	1.78939	0.0735535	15	14	0.076919		235	200	95	0.436436
1490.97	6707.02	239	196	91	0.61101	0.541193	0.61101	0.541193	15	14	0.561291		240	195	90	0.654654	0.512691	0.654654	0.512691	15	14	0.532545		260	175	70	1.52753	0.126631	1.52753	0.126631	15	14	0.1337		264	171	66	1.7021	0.0887377	1.7021	0.0887377	15	14	0.0932157		234	201	96	0.392792
1492.9	6698.36	240	195	90	0.654654	0.512691	0.654654	0.512691	15	14	0.532545		241	194	89	0.698297	0.484992	0.698297	0.484992	15	14	0.504539		259	176	71	1.48388	0.137841	1.48388	0.137841	15	14	0.145619		265	170	65	1.74574	0.0808565	1.74574	0.0808565	15	14	0.0847612		232	203	98	0.305505
1494.83	6689.71	242	193	88	0.741941	0.458124	0.741941	0.458124	15	14	0.477307		241	194	89	0.698297	0.484992	0.698297	0.484992	15	14	0.504539		256	179	74	1.35295	0.176072	1.35295	0.176072	15	14	0.186083		264	171	66	1.7021	0.0887377	1.7021	0.0887377	15	14	0.0932157		233	202	97	0.349149
1496.76	6681.09	243	192	87	0.785584	0.432112	0.785584	0.432112	15	14	0.450872		239	196	91	0.61101	0.541193	0.61101	0.541193	15	14	0.561291		259	176	71	1.48388	0.137841	1.48388	0.137841	15	14	0.145619		264	171	66	1.7021	0.0887377	1.7021	0.0887377	15	14	0.0932157		232	203	98	0.305505
1498.69	6672.49	241	194	89	0.698297	0.484992	0.698297	0.484992	15	14	0.504539		240	195	90	0.654654	0.512691	0.654654	0.512691	15	14	0.532545		260	175	70	1.52753	0.126631	1.52753	0.126631	15	14	0.1337		264	171	66	1.7021	0.0887377	1.7021	0.0887377	15	14	0.0932157		232	203	98	0.305505
1500.62	6663.92	240	195	90	0.654654	0.512691	0.654654	0.512691	15	14	0.532545		241	194	89	0.698297	0.484992	0.698297	0.484992	15	14	0.504539		258	177	72	1.44024	0.149801	1.44024	0.149801	15	14	0.158309		264	171	66	1.7021	0.0887377	1.7021	0.0887377	15	14	0.0932157		232	203	98	0.305505
1502.55	6655.36	241	194	89	0.698297	0.484992	0.698297	0.484992	15	14	0.504539		241	194	89	0.698297	0.484992	0.698297	0.484992	15	14	0.504539		258	177	72	1.44024	0.149801	1.44024	0.149801	15	14	0.158309		266	169	64	1.78939	0.0735535	1.78939	0.0735535	15	14	0.076919		235	200	95	0.436436
1504.48	6646.83	243	192	87	0.785584	0.432112	0.785584	0.432112	15	14	0.450872		244	191	86	0.829228	0.406976	0.829228	0.406976	15	14	0.425262		259	176	71	1.48388	0.137841	1.48388	0.137841	15	14	0.145619		265	170	65	1.74574	0.0808565	1.74574	0.0808565	15	14	0.0847612		234	201	96	0.392792
1506.41	6638.32	243	192	87	0.785584	0.432112	0.785584	0.432112	15	14	0.450872		250	185	80	1.09109	0.275234	1.09109	0.275234	15	14	0.289776		257	178	73	1.39659	0.162537	1.39659	0.162537	15	14	0.171789		271	164	59	2.0076	0.0446862	2.0076	0.0446862	15	14	0.045875		241	194	89	0.698297
1508.33	6629.83	242	193	88	0.741941	0.458124	0.741941	0.458124	15	14	0.477307		241	194	89	0.698297	0.484992	0.698297	0.484992	15	14	0.504539		259	176	71	1.48388	0.137841	1.48388	0.137841	15	14	0.145619		263	172	67	1.65846	0.0972264	1.65846	0.0972264	15	14	0.102309		235	200	95	0.436436
1510.26	6621.36	241	194	89	0.698297	0.484992	0.698297	0.484992	15	14	0.504539		240	195	90	0.654654	0.512691	0.654654	0.512691	15	14	0.532545		261	174	69	1.57117	0.116144	1.57117	0.116144	15	14	0.122524		265	170	65	1.74574	0.0808565	1.74574	0.0808565	15	14	0.0847612		235	200	95	0.436436
1512.19	6612.92	244	191	86	0.829228	0.406976	0.829228	0.406976	15	14	0.425262		242	193	88	0.741941	0.458124	0.741941	0.458124	15	14	0.477307		262	173	68	1.61481	0.106352	1.61481	0.106352	15	14	0.11207		267	168	63	1.83303	0.066799	1.83303	0.066799	15	14	0.0696586		234	201	96	0.392792
1514.12	6604.49	243	192	87	0.785584	0.432112	0.785584	0.432112	15	14	0.450872		242	193	88	0.741941	0.458124	0.741941	0.458124	15	14	0.477307		260	175	70	1.52753	0.126631	1.52753	0.126631	15	14	0.1337		266	169	64	1.78939	0.0735535	1.78939	0.0735535	15	14	0.076919		234	201	96	0.392792
1516.05	6596.09	242	193	88	0.741941	0.458124	0.741941	0.458124	15	14	0.477307		240	195	90	0.654654	0.512691	0.654654	0.512691	15	14	0.532545		260	175	70	1.52753	0.126631	1.52753	0.126631	15	14	0.1337		268	167	62	1.87667	0.0605637	1.87667	0.0605637	15	14	0.0629534		235	200	95	0.436436
1517.98	6587.71	242	193	88	0.741941	0.458124	0.741941	0.458124	15	14	0.477307		240	195	90	0.654654	0.512691	0.654654	0.512691	15	14	0.532545		259	176	71	1.48388	0.137841	1.48388	0.137841	15	14	0.145619		268	167	62	1.87667	0.0605637	1.87667	0.0605637	15	14	0.0629534		235	200	95	0.436436
1519.91	6579.35	241	194	89	0.698297	0.484992	0.698297	0.484992	15	14	0.504539		239	196	91	0.61101	0.541193	0.61101	0.541193	15	14	0.561291		259	176	71	1.48388	0.137841	1.48388	0.137841	15	14	0.145619		269	166	61	1.92032	0.0548187	1.92032	0.0548187	15	14	0.0567726		234	201	96	0.392792
1521.84	6571.01	238	197	92	0.567367	0.570466	0.567367	0.570466	15	14	0.590745		239	196	91	0.61101	0.541193	0.61101	0.541193	15	14	0.561291		257	178	73	1.39659	0.162537	1.39659	0.162537	15	14	0.171789		268	167	62	1.87667	0.0605637	1.87667	0.0605637	15	14	0.0629534		236	199	94	0.480079
1523.76	6562.69	242	193	88	0.741941	0.458124	0.741941	0.458124	15	14	0.477307		241	194	89	0.698297	0.484992	0.698297	0.484992	15	14	0.504539		260	175	70	1.52753	0.126631	1.52753	0.126631	15	14	0.1337		267	168	63	1.83303	0.066799	1.83303	0.066799	15	14	0.0696586		235	200	95	0.436436
1525.69	6554.4	242	193	88	0.741941	0.458124	0.741941	0.458124	15	14	0.477307		239	196	91	0.61101	0.541193	0.61101	0.541193	15	14	0.561291		261	174	69	1.57117	0.116144	1.57117	0.116144	15	14	0.122524		265	170	65	1.74574	0.0808565	1.74574	0.0808565	15	14	0.0847612		236	199	94	0.480079
1527.62	6546.12	242	193	88	0.741941	0.458124	0.741941	0.458124	15	14	0.477307		241	194	89	0.698297	0.484992	0.698297	0.484992	15	14	0.504539		261	174	69	1.57117	0.116144	1.57117	0.116144	15	14	0.122524		263	172	67	1.65846	0.0972264	1.65846	0.0972264	15	14	0.102309		235	200	95	0.436436
1529.55	6537.87	242	193	88	0.741941	0.458124	0.741941	0.458124	15	14	0.477307		242	193	88	0.741941	0.458124	0.741941	0.458124	15	14	0.477307		262	173	68	1.61481	0.106352	1.61481	0.106352	15	14	0.11207		265	170	65	1.74574	0.0808565	1.74574	0.0808565	15	14	0.0847612		234	201	96	0.392792
1531.48	6529.63	242	193	88	0.741941	0.458124	0.741941	0.458124	15	14	0.477307		242	193	88	0.741941	0.458124	0.741941	0.458124	15	14	0.477307		260	175	70	1.52753	0.126631	1.52753	0.126631	15	14	0.1337		265	170	65	1.74574	0.0808565	1.74574	0.0808565	15	14	0.0847612		234	201	96	0.392792
1533.41	6521.42	242	193	88	0.741941	0.458124	0.741941	0.458124	15	14	0.477307		240	195	90	0.654654	0.512691	0.654654	0.512691	15	14	0.532545		259	176	71	1.48388	0.137841	1.48388	0.137841	15	14	0.145619		263	172	67	1.65846	0.0972264	1.65846	0.0972264	15	14	0.102309		233	202	97	0.349149
1535.34	6513.23	242	193	88	0.741941	0.458124	0.741941	0.458124	15	14	0.477307		243	192	87	0.785584	0.432112	0.785584	0.432112	15	14	0.450872		258	177	72	1.44024	0.149801	1.44024	0.149801	15	14	0.158309		266	169	64	1.78939	0.0735535	1.78939	0.0735535	15	14	0.076919		233	202	97	0.349149
1537.27	6505.05	241	194	89	0.698297	0.484992	0.698297	0.484992	15	14	0.504539		237	198	93	0.523723	0.600472	0.523723	0.600472	15	14	0.620867		256	179	74	1.35295	0.176072	1.35295	0.176072	15	14	0.186083		265	170	65	1.74574	0.0808565	1.74574	0.0808565	15	14	0.0847612		234	201	96	0.392792
1539.2	6496.9	244	191	86	0.829228	0.406976	0.829228	0.406976	15	14	0.425262		237	198	93	0.523723	0.600472	0.523723	0.600472	15	14	0.620867		259	176	71	1.48388	0.137841	1.48388	0.137841	15	14	0.145619		266	169	64	1.78939	0.0735535	1.78939	0.0735535	15	14	0.076919		234	201	96	0.392792
1541.12	6488.77	246	189	84	0.916515	0.359397	0.916515	0.359397	15	14	0.376588		241	194	89	0.698297	0.484992	0.698297	0.484992	15	14	0.504539		256	179	74	1.35295	0.176072	1.35295	0.176072	15	14	0.186083		267	168	63	1.83303	0.066799	1.83303	0.066799	15	14	0.0696586		234	201	96	0.392792
1543.05	6480.66	245	190	85	0.872872	0.382734	0.872872	0.382734	15	14	0.400494		240	195	90	0.654654	0.512691	0.654654	0.512691	15	14	0.532545		258	177	72	1.44024	0.149801	1.44024	0.149801	15	14	0.158309		267	168	63	1.83303	0.066799	1.83303	0.066799	15	14	0.0696586		235	200	95	0.436436
1544.98	6472.57	243	192	87	0.785584	0.432112	0.785584	0.432112	15	14	0.450872		240	195	90	0.654654	0.512691	0.654654	0.512691	15	14	0.532545		260	175	70	1.52753	0.126631	1.52753	0.126631	15	14	0.1337		264	171	66	1.7021	0.0887377	1.7021	0.0887377	15	14	0.0932157		232	203	98	0.305505
1546.91	6464.5	244	191	86	0.829228	0.406976	0.829228	0.406976	15	14	0.425262		241	194	89	0.698297	0.484992	0.698297	0.484992	15	14	0.504539		257	178	73	1.39659	0.162537	1.39659	0.162537	15	14	0.171789		262	173	68	1.61481	0.106352	1.61481	0.106352	15	14	0.11207		234	201	96	0.392792
1548.84	6456.45	242	193	88	0.741941	0.458124	0.741941	0.458124	15	14	0.477307		242	193	88	0.741941	0.458124	0.741941	0.458124	15	14	0.477307		257	178	73	1.39659	0.162537	1.39659	0.162537	15	14	0.171789		262	173	68	1.61481	0.106352	1.61481	0.106352	15	14	0.11207		234	201	96	0.392792
1550.77	6448.42	242	193	88	0.741941	0.458124	0.741941	0.458124	15	14	0.477307		243	192	87	0.785584	0.432112	0.785584	0.432112	15	14	0.450872		255	180	75	1.30931	0.190431	1.30931	0.190431	15	14	0.201205		262	173	68	1.61481	0.106352	1.61481	0.106352	15	14	0.11207		232	203	98	0.305505
1552.7	6440.41	239	196	91	0.61101	0.541193	0.61101	0.541193	15	14	0.561291		241	194	89	0.698297	0.484992	0.698297	0.484992	15	14	0.504539		258	177	72	1.44024	0.149801	1.44024	0.149801	15	14	0.158309		261	174	69	1.57117	0.116144	1.57117	0.116144	15	14	0.122524		232	203	98	0.305505
1554.63	6432.42	241	194	89	0.698297	0.484992	0.698297	0.484992	15	14	0.504539		239	196	91	0.61101	0.541193	0.61101	0.541193	15	14	0.561291		258	177	72	1.44024	0.149801	1.44024	0.149801	15	14	0.158309		261	174	69	1.57117	0.116144	1.57117	0.116144	15	14	0.122524		232	203	98	0.305505
1556.55	6424.45	242	193	88	0.741941	0.458124	0.741941	0.458124	15	14	0.477307		230	205	100	0.218218	0.827259	0.218218	0.827259	15	14	0.846694		257	178	73	1.39659	0.162537	1.39659	0.162537	15	14	0.171789		264	171	66	1.7021	0.0887377	1.7021	0.0887377	15	14	0.0932157		232	203	98	0.305505
1558.48	6416.49	250	185	80	1.09109	0.275234	1.09109	0.275234	15	14	0.289776		235	200	95	0.436436	0.662521	0.436436	0.662521	15	14	0.682954		252	183	78	1.17838	0.238647	1.17838	0.238647	15	14	0.251712		263	172	67	1.65846	0.0972264	1.65846	0.0972264	15	14	0.102309		230	205	100	0.218218
1560.41	6408.56	245	190	85	0.872872	0.382734	0.872872	0.382734	15	14	0.400494		243	192	87	0.785584	0.432112	0.785584	0.432112	15	14	0.450872		258	177	72	1.44024	0.149801	1.44024	0.149801	15	14	0.158309		263	172	67	1.65846	0.0972264	1.65846	0.0972264	15	14	0.102309		231	204	99	0.261861
1562.34	6400.65	244	191	86	0.829228	0.406976	0.829228	0.406976	15	14	0.425262		242	193	88	0.741941	0.458124	0.741941	0.458124	15	14	0.477307		255	180	75	1.30931	0.190431	1.30931	0.190431	15	14	0.201205		262	173	68	1.61481	0.106352	1.61481	0.106352	15	14	0.11207		230	205	100	0.218218
1564.27	6392.76	243	192	87	0.785584	0.432112	0.785584	0.432112	15	14	0.450872		242	193	88	0.741941	0.458124	0.741941	0.458124	15	14	0.477307		254	181	76	1.26566	0.205634	1.26566	0.205634	15	14	0.217176		263	172	67	1.65846	0.0972264	1.65846	0.0972264	15	14	0.102309		232	203	98	0.305505
1566.2	6384.89	245	190	85	0.872872	0.382734	0.872872	0.382734	15	14	0.400494		241	194	89	0.698297	0.484992	0.698297	0.484992	15	14	0.504539		257	178	73	1.39659	0.162537	1.39659	0.162537	15	14	0.171789		261	174	69	1.57117	0.116144	1.57117	0.116144	15	14	0.122524		234	201	96	0.392792
1568.13	6377.03	247	188	83	0.960159	0.336976	0.960159	0.336976	15	14	0.353554		238	197	92	0.567367	0.570466	0.567367	0.570466	15	14	0.590745		256	179	74	1.35295	0.176072	1.35295	0.176072	15	14	0.186083		260	175	70	1.52753	0.126631	1.52753	0.126631	15	14	0.1337		232	203	98	0.305505
1570.06	6369.2	246	189	84	0.916515	0.359397	0.916515	0.359397	15	14	0.376588		239	196	91	0.61101	0.541193	0.61101	0.541193	15	14	0.561291		254	181	76	1.26566	0.205634	1.26566	0.205634	15	14	0.217176		261	174	69	1.57117	0.116144	1.57117	0.116144	15	14	0.122524		232	203	98	0.305505
1571.99	6361.38	245	190	85	0.872872	0.382734	0.872872	0.382734	15	14	0.400494		239	196	91	0.61101	0.541193	0.61101	0.541193	15	14	0.561291		255	180	75	1.30931	0.190431	1.30931	0.190431	15	14	0.201205		258	177	72	1.44024	0.149801	1.44024	0.149801	15	14	0.158309		232	203	98	0.305505
1573.91	6353.59	250	185	80	1.09109	0.275234	1.09109	0.275234	15	14	0.289776		235	200	95	0.436436	0.662521	0.436436	0.662521	15	14	0.682954		257	178	73	1.39659	0.162537	1.39659	0.162537	15	14	0.171789		261	174	69	1.57117	0.116144	1.57117	0.116144	15	14	0.122524		229	206	101	0.174574
1575.84	6345.81	251	184	79	1.13473	0.256488	1.13473	0.256488	15	14	0.270299		236	199	94	0.480079	0.631171	0.480079	0.631171	15	14	0.651619		254	181	76	1.26566	0.205634	1.26566	0.205634	15	14	0.217176		263	172	67	1.65846	0.0972264	1.65846	0.0972264	15	14	0.102309		230	205	100	0.218218
1577.77	6338.05	252	183	78	1.17838	0.238647	1.17838	0.238647	15	14	0.251712		239	196	91	0.61101	0.541193	0.61101	0.541193	15	14	0.561291		256	179	74	1.35295	0.176072	1.35295	0.176072	15	14	0.186083		262	173	68	1.61481	0.106352	1.61481	0.106352	15	14	0.11207		229	206	101	0.174574
1579.7	6330.31	249	186	81	1.04745	0.294895	1.04745	0.294895	15	14	0.310143		234	201	96	0.392792	0.694473	0.392792	0.694473	15	14	0.71483		255	180	75	1.30931	0.190431	1.30931	0.190431	15	14	0.201205		260	175	70	1.52753	0.126631	1.52753	0.126631	15	14	0.1337		229	206	101	0.174574
1581.63	6322.59	245	190	85	0.872872	0.382734	0.872872	0.382734	15	14	0.400494		234	201	96	0.392792	0.694473	0.392792	0.694473	15	14	0.71483		255	180	75	1.30931	0.190431	1.30931	0.190431	15	14	0.201205		260	175	70	1.52753	0.126631	1.52753	0.126631	15	14	0.1337		228	207	102	0.130931
1583.56	6314.89	246	189	84	0.916515	0.359397	0.916515	0.359397	15	14	0.376588		231	204	99	0.261861	0.793428	0.261861	0.793428	15	14	0.813179		255	180	75	1.30931	0.190431	1.30931	0.190431	15	14	0.201205		256	179	74	1.35295	0.176072	1.35295	0.176072	15	14	0.186083		229	206	101	0.174574
1585.49	6307.21	246	189	84	0.916515	0.359397	0.916515	0.359397	15	14	0.376588		233	202	97	0.349149	0.726978	0.349149	0.726978	15	14	0.747192		256	179	74	1.35295	0.176072	1.35295	0.176072	15	14	0.186083		256	179	74	1.35295	0.176072	1.35295	0.176072	15	14	0.186083		227	208	103	0.0872872
1587.42	6299.55	248	187	82	1.0038	0.315475	1.0038	0.315475	15	14	0.331405		234	201	96	0.392792	0.694473	0.392792	0.694473	15	14	0.71483		254	181	76	1.26566	0.205634	1.26566	0.205634	15	14	0.217176		255	180	75	1.30931	0.190431	1.30931	0.190431	15	14	0.201205		228	207	102	0.130931
1589.34	6291.9	246	189	84	0.916515	0.359397	0.916515	0.359397	15	14	0.376588		234	201	96	0.392792	0.694473	0.392792	0.694473	15	14	0.71483		257	178	73	1.39659	0.162537	1.39659	0.162537	15	14	0.171789		251	184	79	1.13473	0.256488	1.13473	0.256488	15	14	0.270299		226	209	104	0.0436436
1591.27	6284.28	247	188	83	0.960159	0.336976	0.960159	0.336976	15	14	0.353554		232	203	98	0.305505	0.759982	0.305505	0.759982	15	14	0.779995		254	181	76	1.26566	0.205634	1.26566	0.205634	15	14	0.217176		254	181	76	1.26566	0.205634	1.26566	0.205634	15	14	0.217176		227	208	103	0.0872872
1593.2	6276.67	250	185	80	1.09109	0.275234	1.09109	0.275234	15	14	0.289776		233	202	97	0.349149	0.726978	0.349149	0.726978	15	14	0.747192		252	183	78	1.17838	0.238647	1.17838	0.238647	15	14	0.251712		251	184	79	1.13473	0.256488	1.13473	0.256488	15	14	0.270299		221	214	101	-0.174574
1595.13	6269.08	249	186	81	1.04745	0.294895	1.04745	0.294895	15	14	0.310143		234	201	96	0.392792	0.694473	0.392792	0.694473	15	14	0.71483		249	186	81	1.04745	0.294895	1.04745	0.294895	15	14	0.310143		253	182	77	1.22202	0.221701	1.22202	0.221701	15	14	0.234007		219	216	99	-0.261861
1597.06	6261.51	250	185	80	1.09109	0.275234	1.09109	0.275234	15	14	0.289776		236	199	94	0.480079	0.631171	0.480079	0.631171	15	14	0.651619		248	187	82	1.0038	0.315475	1.0038	0.315475	15	14	0.331405		251	184	79	1.13473	0.256488	1.13473	0.256488	15	14	0.270299		220	215	100	-0.218218
1598.99	6253.95	248	187	82	1.0038	0.315475	1.0038	0.315475	15	14	0.331405		232	203	98	0.305505	0.759982	0.305505	0.759982	15	14	0.779995		249	186	81	1.04745	0.294895	1.04745	0.294895	15	14	0.310143		251	184	79	1.13473	0.256488	1.13473	0.256488	15	14	0.270299		220	215	100	-0.218218
1600.92	6246.42	246	189	84	0.916515	0.359397	0.916515	0.359397	15	14	0.376588		232	203	98	0.305505	0.759982	0.305505	0.759982	15	14	0.779995		245	190	85	0.872872	0.382734	0.872872	0.382734	15	14	0.400494		252	183	78	1.17838	0.238647	1.17838	0.238647	15	14	0.251712		218	217	98	-0.305505
1602.85	6238.9	246	189	84	0.916515	0.359397	0.916515	0.359397	15	14	0.376588		231	204	99	0.261861	0.793428	0.261861	0.793428	15	14	0.813179		241	194	89	0.698297	0.484992	0.698297	0.484992	15	14	0.504539		250	185	80	1.09109	0.275234	1.09109	0.275234	15	14	0.289776		218	217	98	-0.305505
1604.77	6231.4	248	187	82	1.0038	0.315475	1.0038	0.315475	15	14	0.331405		231	204	99	0.261861	0.793428	0.261861	0.793428	15	14	0.813179		240	195	90	0.654654	0.512691	0.654654	0.512691	15	14	0.532545		241	194	89	0.698297	0.484992	0.698297	0.484992	15	14	0.504539		218	217	98	-0.305505
1606.7	6223.92	245	190	85	0.872872	0.382734	0.872872	0.382734	15	14	0.400494		233	202	97	0.349149	0.726978	0.349149	0.726978	15	14	0.747192		238	197	92	0.567367	0.570466	0.567367	0.570466	15	14	0.590745		241	194	89	0.698297	0.484992	0.698297	0.484992	15	14	0.504539		218	217	98	-0.305505
1608.63	6216.46	248	187	82	1.0038	0.315475	1.0038	0.315475	15	14	0.331405		233	202	97	0.349149	0.726978	0.349149	0.726978	15	14	0.747192		238	197	92	0.567367	0.570466	0.567367	0.570466	15	14	0.590745		242	193	88	0.741941	0.458124	0.741941	0.458124	15	14	0.477307		217	218	97	-0.349149
1610.56	6209.02	253	182	77	1.22202	0.221701	1.22202	0.221701	15	14	0.234007		231	204	99	0.261861	0.793428	0.261861	0.793428	15	14	0.813179		238	197	92	0.567367	0.570466	0.567367	0.570466	15	14	0.590745		242	193	88	0.741941	0.458124	0.741941	0.458124	15	14	0.477307		216	219	96	-0.392792
1612.49	6201.59	249	186	81	1.04745	0.294895	1.04745	0.294895	15	14	0.310143		230	205	100	0.218218	0.827259	0.218218	0.827259	15	14	0.846694		233	202	97	0.349149	0.726978	0.349149	0.726978	15	14	0.747192		241	194	89	0.698297	0.484992	0.698297	0.484992	15	14	0.504539		214	221	94	-0.480079
1614.42	6194.18	245	190	85	0.872872	0.382734	0.872872	0.382734	15	14	0.400494		232	203	98	0.305505	0.759982	0.305505	0.759982	15	14	0.779995		234	201	96	0.392792	0.694473	0.392792	0.694473	15	14	0.71483		242	193	88	0.741941	0.458124	0.741941	0.458124	15	14	0.477307		213	222	93	-0.523723
1616.35	6186.79	256	179	74	1.35295	0.176072	1.35295	0.176072	15	14	0.186083		247	188	83	0.960159	0.336976	0.960159	0.336976	15	14	0.353554		234	201	96	0.392792	0.694473	0.392792	0.694473	15	14	0.71483		248	187	82	1.0038	0.315475	1.0038	0.315475	15	14	0.331405		217	218	97	-0.349149
1618.28	6179.41	257	178	73	1.39659	0.162537	1.39659	0.162537	15	14	0.171789		249	186	81	1.04745	0.294895	1.04745	0.294895	15	14	0.310143		238	197	92	0.567367	0.570466	0.567367	0.570466	15	14	0.590745		249	186	81	1.04745	0.294895	1.04745	0.294895	15	14	0.310143		222	213	102	-0.130931
1620.21	6172.06	241	194	89	0.698297	0.484992	0.698297	0.484992	15	14	0.504539		236	199	94	0.480079	0.631171	0.480079	0.631171	15	14	0.651619		227	208	103	0.0872872	0.930443	0.0872872	0.930443	15	14	0.948623		240	195	90	0.654654	0.512691	0.654654	0.512691	15	14	0.532545		203	232	83	-0.960159
1622.13	6164.72	232	203	98	0.305505	0.759982	0.305505	0.759982	15	14	0.779995		237	198	93	0.523723	0.600472	0.523723	0.600472	15	14	0.620867		231	204	99	0.261861	0.793428	0.261861	0.793428	15	14	0.813179		241	194	89	0.698297	0.484992	0.698297	0.484992	15	14	0.504539		203	232	83	-0.960159
1624.06	6157.4	226	209	104	0.0436436	0.965189	0.0436436	0.965189	15	14	0.982865		233	202	97	0.349149	0.726978	0.349149	0.726978	15	14	0.747192		237	198	93	0.523723	0.600472	0.523723	0.600472	15	14	0.620867		244	191	86	0.829228	0.406976	0.829228	0.406976	15	14	0.425262		210	225	90	-0.654654
1625.99	6150.09	231	204	99	0.261861	0.793428	0.261861	0.793428	15	14	0.813179		241	194	89	0.698297	0.484992	0.698297	0.484992	15	14	0.504539		243	192	87	0.785584	0.432112	0.785584	0.432112	15	14	0.450872		241	194	89	0.698297	0.484992	0.698297	0.484992	15	14	0.504539		207	228	87	-0.785584
1627.92	6142.81	239	196	91	0.61101	0.541193	0.61101	0.541193	15	14	0.561291		230	205	100	0.218218	0.827259	0.218218	0.827259	15	14	0.846694		241	194	89	0.698297	0.484992	0.698297	0.484992	15	14	0.504539		238	197	92	0.567367	0.570466	0.567367	0.570466	15	14	0.590745		212	223	92	-0.567367
1629.85	6135.54	233	202	97	0.349149	0.726978	0.349149	0.726978	15	14	0.747192		233	202	97	0.349149	0.726978	0.349149	0.726978	15	14	0.747192		239	196	91	0.61101	0.541193	0.61101	0.541193	15	14	0.561291		236	199	94	0.480079	0.631171	0.480079	0.631171	15	14	0.651619		207	228	87	-0.785584
1631.78	6128.28	227	208	103	0.0872872	0.930443	0.0872872	0.930443	15	14	0.948623		226	209	104	0.0436436	0.965189	0.0436436	0.965189	15	14	0.982865		238	197	92	0.567367	0.570466	0.567367	0.570466	15	14	0.590745		234	201	96	0.392792	0.694473	0.392792	0.694473	15	14	0.71483		214	221	94	-0.480079
1633.71	6121.05	233	202	97	0.349149	0.726978	0.349149	0.726978	15	14	0.747192		225	210	105	0	1	0	1	15	14	1.01714		250	185	80	1.09109	0.275234	1.09109	0.275234	15	14	0.289776		222	213	102	-0.130931	0.89583	-0.130931	0.89583	15	14	0.914475		228	207	102	0.130931
1635.64	6113.83	238	197	92	0.567367	0.570466	0.567367	0.570466	15	14	0.590745		240	195	90	0.654654	0.512691	0.654654	0.512691	15	14	0.532545		276	159	54	2.22582	0.0260268	2.22582	0.0260268	15	14	0.025885		239	196	91	0.61101	0.541193	0.61101	0.541193	15	14	0.561291		268	167	62	1.87667
1637.56	6106.63	243	192	87	0.785584	0.432112	0.785584	0.432112	15	14	0.450872		244	191	86	0.829228	0.406976	0.829228	0.406976	15	14	0.425262		256	179	74	1.35295	0.176072	1.35295	0.176072	15	14	0.186083		246	189	84	0.916515	0.359397	0.916515	0.359397	15	14	0.376588		231	204	99	0.261861
1639.49	6099.44	230	205	100	0.218218	0.827259	0.218218	0.827259	15	14	0.846694		234	201	96	0.392792	0.694473	0.392792	0.694473	15	14	0.71483		250	185	80	1.09109	0.275234	1.09109	0.275234	15	14	0.289776		240	195	90	0.654654	0.512691	0.654654	0.512691	15	14	0.532545		222	213	102	-0.130931
1641.42	6092.28	227	208	103	0.0872872	0.930443	0.0872872	0.930443	15	14	0.948623		239	196	91	0.61101	0.541193	0.61101	0.541193	15	14	0.561291		244	191	86	0.829228	0.406976	0.829228	0.406976	15	14	0.425262		242	193	88	0.741941	0.458124	0.741941	0.458124	15	14	0.477307		216	219	96	-0.392792
1643.35	6085.13	228	207	102	0.130931	0.89583	0.130931	0.89583	15	14	0.914475		228	207	102	0.130931	0.89583	0.130931	0.89583	15	14	0.914475		246	189	84	0.916515	0.359397	0.916515	0.359397	15	14	0.376588		227	208	103	0.0872872	0.930443	0.0872872	0.930443	15	14	0.948623		217	218	97	-0.349149
1645.28	6077.99	234	201	96	0.392792	0.694473	0.392792	0.694473	15	14	0.71483		245	190	85	0.872872	0.382734	0.872872	0.382734	15	14	0.400494		256	179	74	1.35295	0.176072	1.35295	0.176072	15	14	0.186083		235	200	95	0.436436	0.662521	0.436436	0.662521	15	14	0.682954		245	190	85	0.872872
1647.21	6070.88	246	189	84	0.916515	0.359397	0.916515	0.359397	15	14	0.376588		242	193	88	0.741941	0.458124	0.741941	0.458124	15	14	0.477307		267	168	63	1.83303	0.066799	1.83303	0.066799	15	14	0.0696586		248	187	82	1.0038	0.315475	1.0038	0.315475	15	14	0.331405		266	169	64	1.78939
1649.14	6063.78	243	192	87	0.785584	0.432112	0.785584	0.432112	15	14	0.450872		234	201	96	0.392792	0.694473	0.392792	0.694473	15	14	0.71483		254	181	76	1.26566	0.205634	1.26566	0.205634	15	14	0.217176		239	196	91	0.61101	0.541193	0.61101	0.541193	15	14	0.561291		239	196	91	0.61101
1651.07	6056.69	250	185	80	1.09109	0.275234	1.09109	0.275234	15	14	0.289776		250	185	80	1.09109	0.275234	1.09109	0.275234	15	14	0.289776		272	163	58	2.05125	0.0402436	2.05125	0.0402436	15	14	0.041102		249	186	81	1.04745	0.294895	1.04745	0.294895	15	14	0.310143		268	167	62	1.87667
1653	6049.62	236	199	94	0.480079	0.631171	0.480079	0.631171	15	14	0.651619		244	191	86	0.829228	0.406976	0.829228	0.406976	15	14	0.425262		267	168	63	1.83303	0.066799	1.83303	0.066799	15	14	0.0696586		266	169	64	1.78939	0.0735535	1.78939	0.0735535	15	14	0.076919		281	154	49	2.44404
1654.92	6042.57	242	193	88	0.741941	0.458124	0.741941	0.458124	15	14	0.477307		254	181	76	1.26566	0.205634	1.26566	0.205634	15	14	0.217176		274	161	56	2.13854	0.0324741	2.13854	0.0324741	15	14	0.0327702		262	173	68	1.61481	0.106352	1.61481	0.106352	15	14	0.11207		253	182	77	1.22202
1656.85	6035.54	241	194	89	0.698297	0.484992	0.698297	0.484992	15	14	0.504539		247	188	83	0.960159	0.336976	0.960159	0.336976	15	14	0.353554		247	188	83	0.960159	0.336976	0.960159	0.336976	15	14	0.353554		255	180	75	1.30931	0.190431	1.30931	0.190431	15	14	0.201205		224	211	104	-0.0436436
1658.78	6028.52	236	199	94	0.480079	0.631171	0.480079	0.631171	15	14	0.651619		239	196	91	0.61101	0.541193	0.61101	0.541193	15	14	0.561291		248	187	82	1.0038	0.315475	1.0038	0.315475	15	14	0.331405		253	182	77	1.22202	0.221701	1.22202	0.221701	15	14	0.234007		226	209	104	0.0436436
1660.71	6021.52	233	202	97	0.349149	0.726978	0.349149	0.726978	15	14	0.747192		241	194	89	0.698297	0.484992	0.698297	0.484992	15	14	0.504539		250	185	80	1.09109	0.275234	1.09109	0.275234	15	14	0.289776		251	184	79	1.13473	0.256488	1.13473	0.256488	15	14	0.270299		220	215	100	-0.218218
1662.64	6014.53	236	199	94	0.480079	0.631171	0.480079	0.631171	15	14	0.651619		243	192	87	0.785584	0.432112	0.785584	0.432112	15	14	0.450872		249	186	81	1.04745	0.294895	1.04745	0.294895	15	14	0.310143		251	184	79	1.13473	0.256488	1.13473	0.256488	15	14	0.270299		221	214	101	-0.174574
1664.57	6007.56	234	201	96	0.392792	0.694473	0.392792	0.694473	15	14	0.71483		246	189	84	0.916515	0.359397	0.916515	0.359397	15	14	0.376588		237	198	93	0.523723	0.600472	0.523723	0.600472	15	14	0.620867		246	189	84	0.916515	0.359397	0.916515	0.359397	15	14	0.376588		208	227	88	-0.741941
1666.5	6000.61	228	207	102	0.130931	0.89583	0.130931	0.89583	15	14	0.914475		241	194	89	0.698297	0.484992	0.698297	0.484992	15	14	0.504539		250	185	80	1.09109	0.275234	1.09109	0.275234	15	14	0.289776		246	189	84	0.916515	0.359397	0.916515	0.359397	15	14	0.376588		221	214	101	-0.174574
1668.43	5993.67	238	197	92	0.567367	0.570466	0.567367	0.570466	15	14	0.590745		251	184	79	1.13473	0.256488	1.13473	0.256488	15	14	0.270299		260	175	70	1.52753	0.126631	1.52753	0.126631	15	14	0.1337		254	181	76	1.26566	0.205634	1.26566	0.205634	15	14	0.217176		228	207	102	0.130931
1670.35	5986.75	243	192	87	0.785584	0.432112	0.785584	0.432112	15	14	0.450872		262	173	68	1.61481	0.106352	1.61481	0.106352	15	14	0.11207		258	177	72	1.44024	0.149801	1.44024	0.149801	15	14	0.158309		258	177	72	1.44024	0.149801	1.44024	0.149801	15	14	0.158309		235	200	95	0.436436
1672.28	5979.85	241	194	89	0.698297	0.484992	0.698297	0.484992	15	14	0.504539		260	175	70	1.52753	0.126631	1.52753	0.126631	15	14	0.1337		241	194	89	0.698297	0.484992	0.698297	0.484992	15	14	0.504539		257	178	73	1.39659	0.162537	1.39659	0.162537	15	14	0.171789		207	228	87	-0.785584
1674.21	5972.96	237	198	93	0.523723	0.600472	0.523723	0.600472	15	14	0.620867		255	180	75	1.30931	0.190431	1.30931	0.190431	15	14	0.201205		237	198	93	0.523723	0.600472	0.523723	0.600472	15	14	0.620867		261	174	69	1.57117	0.116144	1.57117	0.116144	15	14	0.122524		205	230	85	-0.872872
1676.14	5966.08	257	178	73	1.39659	0.162537	1.39659	0.162537	15	14	0.171789		257	178	73	1.39659	0.162537	1.39659	0.162537	15	14	0.171789		246	189	84	0.916515	0.359397	0.916515	0.359397	15	14	0.376588		255	180	75	1.30931	0.190431	1.30931	0.190431	15	14	0.201205		218	217	98	-0.305505
1678.07	5959.23	256	179	74	1.35295	0.176072	1.35295	0.176072	15	14	0.186083		248	187	82	1.0038	0.315475	1.0038	0.315475	15	14	0.331405		247	188	83	0.960159	0.336976	0.960159	0.336976	15	14	0.353554		253	182	77	1.22202	0.221701	1.22202	0.221701	15	14	0.234007		217	218	97	-0.349149
1680	5952.39	255	180	75	1.30931	0.190431	1.30931	0.190431	15	14	0.201205		252	183	78	1.17838	0.238647	1.17838	0.238647	15	14	0.251712		252	183	78	1.17838	0.238647	1.17838	0.238647	15	14	0.251712		256	179	74	1.35295	0.176072	1.35295	0.176072	15	14	0.186083		217	218	97	-0.349149
1681.93	5945.56	248	187	82	1.0038	0.315475	1.0038	0.315475	15	14	0.331405		257	178	73	1.39659	0.162537	1.39659	0.162537	15	14	0.171789		254	181	76	1.26566	0.205634	1.26566	0.205634	15	14	0.217176		261	174	69	1.57117	0.116144	1.57117	0.116144	15	14	0.122524		212	223	92	-0.567367
1683.86	5938.75	259	176	71	1.48388	0.137841	1.48388	0.137841	15	14	0.145619		271	164	59	2.0076	0.0446862	2.0076	0.0446862	15	14	0.045875		262	173	68	1.61481	0.106352	1.61481	0.106352	15	14	0.11207		266	169	64	1.78939	0.0735535	1.78939	0.0735535	15	14	0.076919		223	212	103	-0.0872872
1685.79	5931.95	260	175	70	1.52753	0.126631	1.52753	0.126631	15	14	0.1337		260	175	70	1.52753	0.126631	1.52753	0.126631	15	14	0.1337		252	183	78	1.17838	0.238647	1.17838	0.238647	15	14	0.251712		250	185	80	1.09109	0.275234	1.09109	0.275234	15	14	0.289776		218	217	98	-0.305505
1687.71	5925.17	258	177	72	1.44024	0.149801	1.44024	0.149801	15	14	0.158309		251	184	79	1.13473	0.256488	1.13473	0.256488	15	14	0.270299		247	188	83	0.960159	0.336976	0.960159	0.336976	15	14	0.353554		250	185	80	1.09109	0.275234	1.09109	0.275234	15	14	0.289776		217	218	97	-0.349149
1689.64	5918.41	255	180	75	1.30931	0.190431	1.30931	0.190431	15	14	0.201205		250	185	80	1.09109	0.275234	1.09109	0.275234	15	14	0.289776		248	187	82	1.0038	0.315475	1.0038	0.315475	15	14	0.331405		252	183	78	1.17838	0.238647	1.17838	0.238647	15	14	0.251712		217	218	97	-0.349149
1691.57	5911.66	252	183	78	1.17838	0.238647	1.17838	0.238647	15	14	0.251712		248	187	82	1.0038	0.315475	1.0038	0.315475	15	14	0.331405		248	187	82	1.0038	0.315475	1.0038	0.315475	15	14	0.331405		254	181	76	1.26566	0.205634	1.26566	0.205634	15	14	0.217176		217	218	97	-0.349149
1693.5	5904.93	250	185	80	1.09109	0.275234	1.09109	0.275234	15	14	0.289776		241	194	89	0.698297	0.484992	0.698297	0.484992	15	14	0.504539		246	189	84	0.916515	0.359397	0.916515	0.359397	15	14	0.376588		254	181	76	1.26566	0.205634	1.26566	0.205634	15	14	0.217176		218	217	98	-0.305505
1695.43	5898.21	250	185	80	1.09109	0.275234	1.09109	0.275234	15	14	0.289776		249	186	81	1.04745	0.294895	1.04745	0.294895	15	14	0.310143		253	182	77	1.22202	0.221701	1.22202	0.221701	15	14	0.234007		256	179	74	1.35295	0.176072	1.35295	0.176072	15	14	0.186083		221	214	101	-0.174574
1697.36	5891.51	253	182	77	1.22202	0.221701	1.22202	0.221701	15	14	0.234007		254	181	76	1.26566	0.205634	1.26566	0.205634	15	14	0.217176		255	180	75	1.30931	0.190431	1.30931	0.190431	15	14	0.201205		256	179	74	1.35295	0.176072	1.35295	0.176072	15	14	0.186083		218	217	98	-0.305505
1699.29	5884.82	262	173	68	1.61481	0.106352	1.61481	0.106352	15	14	0.11207		254	181	76	1.26566	0.205634	1.26566	0.205634	15	14	0.217176		256	179	74	1.35295	0.176072	1.35295	0.176072	15	14	0.186083		259	176	71	1.48388	0.137841	1.48388	0.137841	15	14	0.145619		221	214	101	-0.174574
1701.22	5878.15	254	181	76	1.26566	0.205634	1.26566	0.205634	15	14	0.217176		256	179	74	1.35295	0.176072	1.35295	0.176072	15	14	0.186083		258	177	72	1.44024	0.149801	1.44024	0.149801	15	14	0.158309		258	177	72	1.44024	0.149801	1.44024	0.149801	15	14	0.158309		227	208	103	0.0872872
1703.14	5871.49	251	184	79	1.13473	0.256488	1.13473	0.256488	15	14	0.270299		252	183	78	1.17838	0.238647	1.17838	0.238647	15	14	0.251712		256	179	74	1.35295	0.176072	1.35295	0.176072	15	14	0.186083		259	176	71	1.48388	0.137841	1.48388	0.137841	15	14	0.145619		230	205	100	0.218218
1705.07	5864.85	256	179	74	1.35295	0.176072	1.35295	0.176072	15	14	0.186083		252	183	78	1.17838	0.238647	1.17838	0.238647	15	14	0.251712		259	176	71	1.48388	0.137841	1.48388	0.137841	15	14	0.145619		262	173	68	1.61481	0.106352	1.61481	0.106352	15	14	0.11207		231	204	99	0.261861
1707	5858.22	250	185	80	1.09109	0.275234	1.09109	0.275234	15	14	0.289776		253	182	77	1.22202	0.221701	1.22202	0.221701	15	14	0.234007		260	175	70	1.52753	0.126631	1.52753	0.126631	15	14	0.1337		261	174	69	1.57117	0.116144	1.57117	0.116144	15	14	0.122524		231	204	99	0.261861
1708.93	5851.61	247	188	83	0.960159	0.336976	0.960159	0.336976	15	14	0.353554		250	185	80	1.09109	0.275234	1.09109	0.275234	15	14	0.289776		257	178	73	1.39659	0.162537	1.39659	0.162537	15	14	0.171789		262	173	68	1.61481	0.106352	1.61481	0.106352	15	14	0.11207		228	207	102	0.130931
1710.86	5845.01	248	187	82	1.0038	0.315475	1.0038	0.315475	15	14	0.331405		249	186	81	1.04745	0.294895	1.04745	0.294895	15	14	0.310143		258	177	72	1.44024	0.149801	1.44024	0.149801	15	14	0.158309		261	174	69	1.57117	0.116144	1.57117	0.116144	15	14	0.122524		228	207	102	0.130931
1712.79	5838.43	249	186	81	1.04745	0.294895	1.04745	0.294895	15	14	0.310143		252	183	78	1.17838	0.238647	1.17838	0.238647	15	14	0.251712		260	175	70	1.52753	0.126631	1.52753	0.126631	15	14	0.1337		261	174	69	1.57117	0.116144	1.57117	0.116144	15	14	0.122524		229	206	101	0.174574
1714.72	5831.86	247	188	83	0.960159	0.336976	0.960159	0.336976	15	14	0.353554		256	179	74	1.35295	0.176072	1.35295	0.176072	15	14	0.186083		261	174	69	1.57117	0.116144	1.57117	0.116144	15	14	0.122524		261	174	69	1.57117	0.116144	1.57117	0.116144	15	14	0.122524		229	206	101	0.174574
1716.65	5825.31	248	187	82	1.0038	0.315475	1.0038	0.315475	15	14	0.331405		254	181	76	1.26566	0.205634	1.26566	0.205634	15	14	0.217176		262	173	68	1.61481	0.106352	1.61481	0.106352	15	14	0.11207		263	172	67	1.65846	0.0972264	1.65846	0.0972264	15	14	0.102309		230	205	100	0.218218
1718.58	5818.77	247	188	83	0.960159	0.336976	0.960159	0.336976	15	14	0.353554		252	183	78	1.17838	0.238647	1.17838	0.238647	15	14	0.251712		261	174	69	1.57117	0.116144	1.57117	0.116144	15	14	0.122524		260	175	70	1.52753	0.126631	1.52753	0.126631	15	14	0.1337		232	203	98	0.305505
1720.5	5812.25	244	191	86	0.829228	0.406976	0.829228	0.406976	15	14	0.425262		249	186	81	1.04745	0.294895	1.04745	0.294895	15	14	0.310143		259	176	71	1.48388	0.137841	1.48388	0.137841	15	14	0.145619		263	172	67	1.65846	0.0972264	1.65846	0.0972264	15	14	0.102309		232	203	98	0.305505
1722.43	5805.74	245	190	85	0.872872	0.382734	0.872872	0.382734	15	14	0.400494		249	186	81	1.04745	0.294895	1.04745	0.294895	15	14	0.310143		258	177	72	1.44024	0.149801	1.44024	0.149801	15	14	0.158309		262	173	68	1.61481	0.106352	1.61481	0.106352	15	14	0.11207		231	204	99	0.261861
1724.36	5799.25	243	192	87	0.785584	0.432112	0.785584	0.432112	15	14	0.450872		248	187	82	1.0038	0.315475	1.0038	0.315475	15	14	0.331405		259	176	71	1.48388	0.137841	1.48388	0.137841	15	14	0.145619		263	172	67	1.65846	0.0972264	1.65846	0.0972264	15	14	0.102309		229	206	101	0.174574
1726.29	5792.77	241	194	89	0.698297	0.484992	0.698297	0.484992	15	14	0.504539		249	186	81	1.04745	0.294895	1.04745	0.294895	15	14	0.310143		260	175	70	1.52753	0.126631	1.52753	0.126631	15	14	0.1337		261	174	69	1.57117	0.116144	1.57117	0.116144	15	14	0.122524		229	206	101	0.174574
1728.22	5786.3	241	194	89	0.698297	0.484992	0.698297	0.484992	15	14	0.504539		250	185	80	1.09109	0.275234	1.09109	0.275234	15	14	0.289776		258	177	72	1.44024	0.149801	1.44024	0.149801	15	14	0.158309		260	175	70	1.52753	0.126631	1.52753	0.126631	15	14	0.1337		228	207	102	0.130931
1730.15	5779.85	240	195	90	0.654654	0.512691	0.654654	0.512691	15	14	0.532545		252	183	78	1.17838	0.238647	1.17838	0.238647	15	14	0.251712		262	173	68	1.61481	0.106352	1.61481	0.106352	15	14	0.11207		261	174	69	1.57117	0.116144	1.57117	0.116144	15	14	0.122524		232	203	98	0.305505
1732.08	5773.42	237	198	93	0.523723	0.600472	0.523723	0.600472	15	14	0.620867		251	184	79	1.13473	0.256488	1.13473	0.256488	15	14	0.270299		262	173	68	1.61481	0.106352	1.61481	0.106352	15	14	0.11207		263	172	67	1.65846	0.0972264	1.65846	0.0972264	15	14	0.102309		228	207	102	0.130931
1734.01	5766.99	237	198	93	0.523723	0.600472	0.523723	0.600472	15	14	0.620867		250	185	80	1.09109	0.275234	1.09109	0.275234	15	14	0.289776		259	176	71	1.48388	0.137841	1.48388	0.137841	15	14	0.145619		265	170	65	1.74574	0.0808565	1.74574	0.0808565	15	14	0.0847612		228	207	102	0.130931
1735.93	5760.59	237	198	93	0.523723	0.600472	0.523723	0.600472	15	14	0.620867		248	187	82	1.0038	0.315475	1.0038	0.315475	15	14	0.331405		256	179	74	1.35295	0.176072	1.35295	0.176072	15	14	0.186083		263	172	67	1.65846	0.0972264	1.65846	0.0972264	15	14	0.102309		232	203	98	0.305505
1737.86	5754.19	240	195	90	0.654654	0.512691	0.654654	0.512691	15	14	0.532545		247	188	83	0.960159	0.336976	0.960159	0.336976	15	14	0.353554		259	176	71	1.48388	0.137841	1.48388	0.137841	15	14	0.145619		262	173	68	1.61481	0.106352	1.61481	0.106352	15	14	0.11207		229	206	101	0.174574
1739.79	5747.81	237	198	93	0.523723	0.600472	0.523723	0.600472	15	14	0.620867		250	185	80	1.09109	0.275234	1.09109	0.275234	15	14	0.289776		256	179	74	1.35295	0.176072	1.35295	0.176072	15	14	0.186083		263	172	67	1.65846	0.0972264	1.65846	0.0972264	15	14	0.102309		232	203	98	0.305505
1741.72	5741.45	241	194	89	0.698297	0.484992	0.698297	0.484992	15	14	0.504539		249	186	81	1.04745	0.294895	1.04745	0.294895	15	14	0.310143		258	177	72	1.44024	0.149801	1.44024	0.149801	15	14	0.158309		263	172	67	1.65846	0.0972264	1.65846	0.0972264	15	14	0.102309		234	201	96	0.392792
1743.65	5735.1	240	195	90	0.654654	0.512691	0.654654	0.512691	15	14	0.532545		249	186	81	1.04745	0.294895	1.04745	0.294895	15	14	0.310143		258	177	72	1.44024	0.149801	1.44024	0.149801	15	14	0.158309		264	171	66	1.7021	0.0887377	1.7021	0.0887377	15	14	0.0932157		234	201	96	0.392792
1745.58	5728.76	237	198	93	0.523723	0.600472	0.523723	0.600472	15	14	0.620867		251	184	79	1.13473	0.256488	1.13473	0.256488	15	14	0.270299		261	174	69	1.57117	0.116144	1.57117	0.116144	15	14	0.122524		264	171	66	1.7021	0.0887377	1.7021	0.0887377	15	14	0.0932157		233	202	97	0.349149
1747.51	5722.44	236	199	94	0.480079	0.631171	0.480079	0.631171	15	14	0.651619		251	184	79	1.13473	0.256488	1.13473	0.256488	15	14	0.270299		258	177	72	1.44024	0.149801	1.44024	0.149801	15	14	0.158309		264	171	66	1.7021	0.0887377	1.7021	0.0887377	15	14	0.0932157		231	204	99	0.261861
1749.44	5716.13	235	200	95	0.436436	0.662521	0.436436	0.662521	15	14	0.682954		251	184	79	1.13473	0.256488	1.13473	0.256488	15	14	0.270299		257	178	73	1.39659	0.162537	1.39659	0.162537	15	14	0.171789		263	172	67	1.65846	0.0972264	1.65846	0.0972264	15	14	0.102309		232	203	98	0.305505
1751.36	5709.83	238	197	92	0.567367	0.570466	0.567367	0.570466	15	14	0.590745		248	187	82	1.0038	0.315475	1.0038	0.315475	15	14	0.331405		258	177	72	1.44024	0.149801	1.44024	0.149801	15	14	0.158309		260	175	70	1.52753	0.126631	1.52753	0.126631	15	14	0.1337		229	206	101	0.174574
1753.29	5703.55	235	200	95	0.436436	0.662521	0.436436	0.662521	15	14	0.682954		244	191	86	0.829228	0.406976	0.829228	0.406976	15	14	0.425262		258	177	72	1.44024	0.149801	1.44024	0.149801	15	14	0.158309		257	178	73	1.39659	0.162537	1.39659	0.162537	15	14	0.171789		228	207	102	0.130931
1755.22	5697.28	235	200	95	0.436436	0.662521	0.436436	0.662521	15	14	0.682954		241	194	89	0.698297	0.484992	0.698297	0.484992	15	14	0.504539		257	178	73	1.39659	0.162537	1.39659	0.162537	15	14	0.171789		257	178	73	1.39659	0.162537	1.39659	0.162537	15	14	0.171789		228	207	102	0.130931
1757.15	5691.03	235	200	95	0.436436	0.662521	0.436436	0.662521	15	14	0.682954		241	194	89	0.698297	0.484992	0.698297	0.484992	15	14	0.504539		257	178	73	1.39659	0.162537	1.39659	0.162537	15	14	0.171789		257	178	73	1.39659	0.162537	1.39659	0.162537	15	14	0.171789		226	209	104	0.0436436
1759.08	5684.79	234	201	96	0.392792	0.694473	0.392792	0.694473	15	14	0.71483		240	195	90	0.654654	0.512691	0.654654	0.512691	15	14	0.532545		256	179	74	1.35295	0.176072	1.35295	0.176072	15	14	0.186083		257	178	73	1.39659	0.162537	1.39659	0.162537	15	14	0.171789		226	209	104	0.0436436
1761.01	5678.56	234	201	96	0.392792	0.694473	0.392792	0.694473	15	14	0.71483		240	195	90	0.654654	0.512691	0.654654	0.512691	15	14	0.532545		257	178	73	1.39659	0.162537	1.39659	0.162537	15	14	0.171789		256	179	74	1.35295	0.176072	1.35295	0.176072	15	14	0.186083		223	212	103	-0.0872872
1762.94	5672.35	236	199	94	0.480079	0.631171	0.480079	0.631171	15	14	0.651619		238	197	92	0.567367	0.570466	0.567367	0.570466	15	14	0.590745		259	176	71	1.48388	0.137841	1.48388	0.137841	15	14	0.145619		256	179	74	1.35295	0.176072	1.35295	0.176072	15	14	0.186083		226	209	104	0.0436436
1764.87	5666.15	234	201	96	0.392792	0.694473	0.392792	0.694473	15	14	0.71483		239	196	91	0.61101	0.541193	0.61101	0.541193	15	14	0.561291		258	177	72	1.44024	0.149801	1.44024	0.149801	15	14	0.158309		255	180	75	1.30931	0.190431	1.30931	0.190431	15	14	0.201205		225	210	105	0
1766.8	5659.96	234	201	96	0.392792	0.694473	0.392792	0.694473	15	14	0.71483		240	195	90	0.654654	0.512691	0.654654	0.512691	15	14	0.532545		258	177	72	1.44024	0.149801	1.44024	0.149801	15	14	0.158309		256	179	74	1.35295	0.176072	1.35295	0.176072	15	14	0.186083		224	211	104	-0.0436436
1768.72	5653.79	234	201	96	0.392792	0.694473	0.392792	0.694473	15	14	0.71483		239	196	91	0.61101	0.541193	0.61101	0.541193	15	14	0.561291		257	178	73	1.39659	0.162537	1.39659	0.162537	15	14	0.171789		257	178	73	1.39659	0.162537	1.39659	0.162537	15	14	0.171789		226	209	104	0.0436436
1770.65	5647.63	234	201	96	0.392792	0.694473	0.392792	0.694473	15	14	0.71483		240	195	90	0.654654	0.512691	0.654654	0.512691	15	14	0.532545		257	178	73	1.39659	0.162537	1.39659	0.162537	15	14	0.171789		256	179	74	1.35295	0.176072	1.35295	0.176072	15	14	0.186083		228	207	102	0.130931
1772.58	5641.49	235	200	95	0.436436	0.662521	0.436436	0.662521	15	14	0.682954		241	194	89	0.698297	0.484992	0.698297	0.484992	15	14	0.504539		256	179	74	1.35295	0.176072	1.35295	0.176072	15	14	0.186083		256	179	74	1.35295	0.176072	1.35295	0.176072	15	14	0.186083		226	209	104	0.0436436
1774.51	5635.36	236	199	94	0.480079	0.631171	0.480079	0.631171	15	14	0.651619		238	197	92	0.567367	0.570466	0.567367	0.570466	15	14	0.590745		258	177	72	1.44024	0.149801	1.44024	0.149801	15	14	0.158309		254	181	76	1.26566	0.205634	1.26566	0.205634	15	14	0.217176		225	210	105	0
1776.44	5629.24	235	200	95	0.436436	0.662521	0.436436	0.662521	15	14	0.682954		238	197	92	0.567367	0.570466	0.567367	0.570466	15	14	0.590745		258	177	72	1.44024	0.149801	1.44024	0.149801	15	14	0.158309		253	182	77	1.22202	0.221701	1.22202	0.221701	15	14	0.234007		224	211	104	-0.0436436
1778.37	5623.13	235	200	95	0.436436	0.662521	0.436436	0.662521	15	14	0.682954		238	197	92	0.567367	0.570466	0.567367	0.570466	15	14	0.590745		258	177	72	1.44024	0.149801	1.44024	0.149801	15	14	0.158309		252	183	78	1.17838	0.238647	1.17838	0.238647	15	14	0.251712		224	211	104	-0.0436436
1780.3	5617.04	235	200	95	0.436436	0.662521	0.436436	0.662521	15	14	0.682954		238	197	92	0.567367	0.570466	0.567367	0.570466	15	14	0.590745		257	178	73	1.39659	0.162537	1.39659	0.162537	15	14	0.171789		253	182	77	1.22202	0.221701	1.22202	0.221701	15	14	0.234007		225	210	105	0
1782.23	5610.96	235	200	95	0.436436	0.662521	0.436436	0.662521	15	14	0.682954		238	197	92	0.567367	0.570466	0.567367	0.570466	15	14	0.590745		256	179	74	1.35295	0.176072	1.35295	0.176072	15	14	0.186083		253	182	77	1.22202	0.221701	1.22202	0.221701	15	14	0.234007		224	211	104	-0.0436436
1784.15	5604.89	235	200	95	0.436436	0.662521	0.436436	0.662521	15	14	0.682954		237	198	93	0.523723	0.600472	0.523723	0.600472	15	14	0.620867		255	180	75	1.30931	0.190431	1.30931	0.190431	15	14	0.201205		254	181	76	1.26566	0.205634	1.26566	0.205634	15	14	0.217176		225	210	105	0
1786.08	5598.84	235	200	95	0.436436	0.662521	0.436436	0.662521	15	14	0.682954		236	199	94	0.480079	0.631171	0.480079	0.631171	15	14	0.651619		255	180	75	1.30931	0.190431	1.30931	0.190431	15	14	0.201205		254	181	76	1.26566	0.205634	1.26566	0.205634	15	14	0.217176		223	212	103	-0.0872872
1788.01	5592.8	235	200	95	0.436436	0.662521	0.436436	0.662521	15	14	0.682954		236	199	94	0.480079	0.631171	0.480079	0.631171	15	14	0.651619		257	178	73	1.39659	0.162537	1.39659	0.162537	15	14	0.171789		252	183	78	1.17838	0.238647	1.17838	0.238647	15	14	0.251712		224	211	104	-0.0436436
1789.94	5586.78	234	201	96	0.392792	0.694473	0.392792	0.694473	15	14	0.71483		239	196	91	0.61101	0.541193	0.61101	0.541193	15	14	0.561291		259	176	71	1.48388	0.137841	1.48388	0.137841	15	14	0.145619		252	183	78	1.17838	0.238647	1.17838	0.238647	15	14	0.251712		226	209	104	0.0436436
1791.87	5580.76	236	199	94	0.480079	0.631171	0.480079	0.631171	15	14	0.651619		238	197	92	0.567367	0.570466	0.567367	0.570466	15	14	0.590745		259	176	71	1.48388	0.137841	1.48388	0.137841	15	14	0.145619		253	182	77	1.22202	0.221701	1.22202	0.221701	15	14	0.234007		227	208	103	0.0872872
1793.8	5574.76	233	202	97	0.349149	0.726978	0.349149	0.726978	15	14	0.747192		237	198	93	0.523723	0.600472	0.523723	0.600472	15	14	0.620867		259	176	71	1.48388	0.137841	1.48388	0.137841	15	14	0.145619		251	184	79	1.13473	0.256488	1.13473	0.256488	15	14	0.270299		225	210	105	0
1795.73	5568.77	234	201	96	0.392792	0.694473	0.392792	0.694473	15	14	0.71483		236	199	94	0.480079	0.631171	0.480079	0.631171	15	14	0.651619		257	178	73	1.39659	0.162537	1.39659	0.162537	15	14	0.171789		252	183	78	1.17838	0.238647	1.17838	0.238647	15	14	0.251712		224	211	104	-0.0436436
1797.66	5562.8	235	200	95	0.436436	0.662521	0.436436	0.662521	15	14	0.682954		237	198	93	0.523723	0.600472	0.523723	0.600472	15	14	0.620867		257	178	73	1.39659	0.162537	1.39659	0.162537	15	14	0.171789		250	185	80	1.09109	0.275234	1.09109	0.275234	15	14	0.289776		224	211	104	-0.0436436
1799.59	5556.84	234	201	96	0.392792	0.694473	0.392792	0.694473	15	14	0.71483		236	199	94	0.480079	0.631171	0.480079	0.631171	15	14	0.651619		259	176	71	1.48388	0.137841	1.48388	0.137841	15	14	0.145619		251	184	79	1.13473	0.256488	1.13473	0.256488	15	14	0.270299		224	211	104	-0.0436436
1801.51	5550.89	235	200	95	0.436436	0.662521	0.436436	0.662521	15	14	0.682954		236	199	94	0.480079	0.631171	0.480079	0.631171	15	14	0.651619		259	176	71	1.48388	0.137841	1.48388	0.137841	15	14	0.145619		253	182	77	1.22202	0.221701	1.22202	0.221701	15	14	0.234007		223	212	103	-0.0872872
1803.44	5544.95	234	201	96	0.392792	0.694473	0.392792	0.694473	15	14	0.71483		236	199	94	0.480079	0.631171	0.480079	0.631171	15	14	0.651619		257	178	73	1.39659	0.162537	1.39659	0.162537	15	14	0.171789		250	185	80	1.09109	0.275234	1.09109	0.275234	15	14	0.289776		222	213	102	-0.130931
1805.37	5539.03	234	201	96	0.392792	0.694473	0.392792	0.694473	15	14	0.71483		234	201	96	0.392792	0.694473	0.392792	0.694473	15	14	0.71483		257	178	73	1.39659	0.162537	1.39659	0.162537	15	14	0.171789		248	187	82	1.0038	0.315475	1.0038	0.315475	15	14	0.331405		221	214	101	-0.174574
1807.3	5533.11	234	201	96	0.392792	0.694473	0.392792	0.694473	15	14	0.71483		235	200	95	0.436436	0.662521	0.436436	0.662521	15	14	0.682954		259	176	71	1.48388	0.137841	1.48388	0.137841	15	14	0.145619		249	186	81	1.04745	0.294895	1.04745	0.294895	15	14	0.310143		221	214	101	-0.174574
1809.23	5527.22	233	202	97	0.349149	0.726978	0.349149	0.726978	15	14	0.747192		234	201	96	0.392792	0.694473	0.392792	0.694473	15	14	0.71483		259	176	71	1.48388	0.137841	1.48388	0.137841	15	14	0.145619		250	185	80	1.09109	0.275234	1.09109	0.275234	15	14	0.289776		221	214	101	-0.174574
1811.16	5521.33	234	201	96	0.392792	0.694473	0.392792	0.694473	15	14	0.71483		236	199	94	0.480079	0.631171	0.480079	0.631171	15	14	0.651619		259	176	71	1.48388	0.137841	1.48388	0.137841	15	14	0.145619		249	186	81	1.04745	0.294895	1.04745	0.294895	15	14	0.310143		221	214	101	-0.174574
1813.09	5515.46	236	199	94	0.480079	0.631171	0.480079	0.631171	15	14	0.651619		235	200	95	0.436436	0.662521	0.436436	0.662521	15	14	0.682954		259	176	71	1.48388	0.137841	1.48388	0.137841	15	14	0.145619		248	187	82	1.0038	0.315475	1.0038	0.315475	15	14	0.331405		222	213	102	-0.130931
1815.02	5509.59	237	198	93	0.523723	0.600472	0.523723	0.600472	15	14	0.620867		235	200	95	0.436436	0.662521	0.436436	0.662521	15	14	0.682954		259	176	71	1.48388	0.137841	1.48388	0.137841	15	14	0.145619		250	185	80	1.09109	0.275234	1.09109	0.275234	15	14	0.289776		222	213	102	-0.130931
1816.94	5503.74	237	198	93	0.523723	0.600472	0.523723	0.600472	15	14	0.620867		235	200	95	0.436436	0.662521	0.436436	0.662521	15	14	0.682954		257	178	73	1.39659	0.162537	1.39659	0.162537	15	14	0.171789		250	185	80	1.09109	0.275234	1.09109	0.275234	15	14	0.289776		222	213	102	-0.130931
1818.87	5497.91	237	198	93	0.523723	0.600472	0.523723	0.600472	15	14	0.620867		234	201	96	0.392792	0.694473	0.392792	0.694473	15	14	0.71483		256	179	74	1.35295	0.176072	1.35295	0.176072	15	14	0.186083		250	185	80	1.09109	0.275234	1.09109	0.275234	15	14	0.289776		222	213	102	-0.130931
1820.8	5492.08	236	199	94	0.480079	0.631171	0.480079	0.631171	15	14	0.651619		234	201	96	0.392792	0.694473	0.392792	0.694473	15	14	0.71483		258	177	72	1.44024	0.149801	1.44024	0.149801	15	14	0.158309		250	185	80	1.09109	0.275234	1.09109	0.275234	15	14	0.289776		222	213	102	-0.130931
1822.73	5486.27	232	203	98	0.305505	0.759982	0.305505	0.759982	15	14	0.779995		234	201	96	0.392792	0.694473	0.392792	0.694473	15	14	0.71483		257	178	73	1.39659	0.162537	1.39659	0.162537	15	14	0.171789		250	185	80	1.09109	0.275234	1.09109	0.275234	15	14	0.289776		221	214	101	-0.174574
1824.66	5480.47	231	204	99	0.261861	0.793428	0.261861	0.793428	15	14	0.813179		234	201	96	0.392792	0.694473	0.392792	0.694473	15	14	0.71483		258	177	72	1.44024	0.149801	1.44024	0.149801	15	14	0.158309		247	188	83	0.960159	0.336976	0.960159	0.336976	15	14	0.353554		221	214	101	-0.174574
1826.59	5474.69	232	203	98	0.305505	0.759982	0.305505	0.759982	15	14	0.779995		234	201	96	0.392792	0.694473	0.392792	0.694473	15	14	0.71483		258	177	72	1.44024	0.149801	1.44024	0.149801	15	14	0.158309		247	188	83	0.960159	0.336976	0.960159	0.336976	15	14	0.353554		222	213	102	-0.130931
1828.52	5468.91	231	204	99	0.261861	0.793428	0.261861	0.793428	15	14	0.813179		234	201	96	0.392792	0.694473	0.392792	0.694473	15	14	0.71483		258	177	72	1.44024	0.149801	1.44024	0.149801	15	14	0.158309		248	187	82	1.0038	0.315475	1.0038	0.315475	15	14	0.331405		223	212	103	-0.0872872
1830.45	5463.15	232	203	98	0.305505	0.759982	0.305505	0.759982	15	14	0.779995		234	201	96	0.392792	0.694473	0.392792	0.694473	15	14	0.71483		257	178	73	1.39659	0.162537	1.39659	0.162537	15	14	0.171789		247	188	83	0.960159	0.336976	0.960159	0.336976	15	14	0.353554		223	212	103	-0.0872872
1832.38	5457.4	232	203	98	0.305505	0.759982	0.305505	0.759982	15	14	0.779995		234	201	96	0.392792	0.694473	0.392792	0.694473	15	14	0.71483		257	178	73	1.39659	0.162537	1.39659	0.162537	15	14	0.171789		248	187	82	1.0038	0.315475	1.0038	0.315475	15	14	0.331405		223	212	103	-0.0872872
1834.3	5451.66	235	200	95	0.436436	0.662521	0.436436	0.662521	15	14	0.682954		234	201	96	0.392792	0.694473	0.392792	0.694473	15	14	0.71483		256	179	74	1.35295	0.176072	1.35295	0.176072	15	14	0.186083		248	187	82	1.0038	0.315475	1.0038	0.315475	15	14	0.331405		222	213	102	-0.130931
1836.23	5445.93	236	199	94	0.480079	0.631171	0.480079	0.631171	15	14	0.651619		233	202	97	0.349149	0.726978	0.349149	0.726978	15	14	0.747192		256	179	74	1.35295	0.176072	1.35295	0.176072	15	14	0.186083		248	187	82	1.0038	0.315475	1.0038	0.315475	15	14	0.331405		222	213	102	-0.130931
1838.16	5440.22	235	200	95	0.436436	0.662521	0.436436	0.662521	15	14	0.682954		233	202	97	0.349149	0.726978	0.349149	0.726978	15	14	0.747192		258	177	72	1.44024	0.149801	1.44024	0.149801	15	14	0.158309		246	189	84	0.916515	0.359397	0.916515	0.359397	15	14	0.376588		222	213	102	-0.130931
1840.09	5434.52	234	201	96	0.392792	0.694473	0.392792	0.694473	15	14	0.71483		232	203	98	0.305505	0.759982	0.305505	0.759982	15	14	0.779995		257	178	73	1.39659	0.162537	1.39659	0.162537	15	14	0.171789		248	187	82	1.0038	0.315475	1.0038	0.315475	15	14	0.331405		223	212	103	-0.0872872
1842.02	5428.82	230	205	100	0.218218	0.827259	0.218218	0.827259	15	14	0.846694		231	204	99	0.261861	0.793428	0.261861	0.793428	15	14	0.813179		257	178	73	1.39659	0.162537	1.39659	0.162537	15	14	0.171789		247	188	83	0.960159	0.336976	0.960159	0.336976	15	14	0.353554		223	212	103	-0.0872872
1843.95	5423.15	231	204	99	0.261861	0.793428	0.261861	0.793428	15	14	0.813179		236	199	94	0.480079	0.631171	0.480079	0.631171	15	14	0.651619		258	177	72	1.44024	0.149801	1.44024	0.149801	15	14	0.158309		248	187	82	1.0038	0.315475	1.0038	0.315475	15	14	0.331405		227	208	103	0.0872872
1845.88	5417.48	234	201	96	0.392792	0.694473	0.392792	0.694473	15	14	0.71483		233	202	97	0.349149	0.726978	0.349149	0.726978	15	14	0.747192		257	178	73	1.39659	0.162537	1.39659	0.162537	15	14	0.171789		248	187	82	1.0038	0.315475	1.0038	0.315475	15	14	0.331405		227	208	103	0.0872872
1847.81	5411.82	234	201	96	0.392792	0.694473	0.392792	0.694473	15	14	0.71483		230	205	100	0.218218	0.827259	0.218218	0.827259	15	14	0.846694		258	177	72	1.44024	0.149801	1.44024	0.149801	15	14	0.158309		247	188	83	0.960159	0.336976	0.960159	0.336976	15	14	0.353554		224	211	104	-0.0436436
1849.73	5406.18	232	203	98	0.305505	0.759982	0.305505	0.759982	15	14	0.779995		229	206	101	0.174574	0.861414	0.174574	0.861414	15	14	0.880478		254	181	76	1.26566	0.205634	1.26566	0.205634	15	14	0.217176		246	189	84	0.916515	0.359397	0.916515	0.359397	15	14	0.376588		224	211	104	-0.0436436
1851.66	5400.55	233	202	97	0.349149	0.726978	0.349149	0.726978	15	14	0.747192		227	208	103	0.0872872	0.930443	0.0872872	0.930443	15	14	0.948623		254	181	76	1.26566	0.205634	1.26566	0.205634	15	14	0.217176		245	190	85	0.872872	0.382734	0.872872	0.382734	15	14	0.400494		223	212	103	-0.0872872
1853.59	5394.93	233	202	97	0.349149	0.726978	0.349149	0.726978	15	14	0.747192		229	206	101	0.174574	0.861414	0.174574	0.861414	15	14	0.880478		254	181	76	1.26566	0.205634	1.26566	0.205634	15	14	0.217176		245	190	85	0.872872	0.382734	0.872872	0.382734	15	14	0.400494		223	212	103	-0.0872872
1855.52	5389.32	233	202	97	0.349149	0.726978	0.349149	0.726978	15	14	0.747192		231	204	99	0.261861	0.793428	0.261861	0.793428	15	14	0.813179		256	179	74	1.35295	0.176072	1.35295	0.176072	15	14	0.186083		244	191	86	0.829228	0.406976	0.829228	0.406976	15	14	0.425262		223	212	103	-0.0872872
1857.45	5383.73	232	203	98	0.305505	0.759982	0.305505	0.759982	15	14	0.779995		232	203	98	0.305505	0.759982	0.305505	0.759982	15	14	0.779995		258	177	72	1.44024	0.149801	1.44024	0.149801	15	14	0.158309		246	189	84	0.916515	0.359397	0.916515	0.359397	15	14	0.376588		222	213	102	-0.130931
1859.38	5378.14	232	203	98	0.305505	0.759982	0.305505	0.759982	15	14	0.779995		231	204	99	0.261861	0.793428	0.261861	0.793428	15	14	0.813179		257	178	73	1.39659	0.162537	1.39659	0.162537	15	14	0.171789		248	187	82	1.0038	0.315475	1.0038	0.315475	15	14	0.331405		223	212	103	-0.0872872
1861.31	5372.57	234	201	96	0.392792	0.694473	0.392792	0.694473	15	14	0.71483		230	205	100	0.218218	0.827259	0.218218	0.827259	15	14	0.846694		257	178	73	1.39659	0.162537	1.39659	0.162537	15	14	0.171789		246	189	84	0.916515	0.359397	0.916515	0.359397	15	14	0.376588		223	212	103	-0.0872872
1863.24	5367.01	234	201	96	0.392792	0.694473	0.392792	0.694473	15	14	0.71483		230	205	100	0.218218	0.827259	0.218218	0.827259	15	14	0.846694		255	180	75	1.30931	0.190431	1.30931	0.190431	15	14	0.201205		245	190	85	0.872872	0.382734	0.872872	0.382734	15	14	0.400494		224	211	104	-0.0436436
1865.17	5361.46	233	202	97	0.349149	0.726978	0.349149	0.726978	15	14	0.747192		231	204	99	0.261861	0.793428	0.261861	0.793428	15	14	0.813179		254	181	76	1.26566	0.205634	1.26566	0.205634	15	14	0.217176		246	189	84	0.916515	0.359397	0.916515	0.359397	15	14	0.376588		224	211	104	-0.0436436
1867.09	5355.92	231	204	99	0.261861	0.793428	0.261861	0.793428	15	14	0.813179		233	202	97	0.349149	0.726978	0.349149	0.726978	15	14	0.747192		255	180	75	1.30931	0.190431	1.30931	0.190431	15	14	0.201205		249	186	81	1.04745	0.294895	1.04745	0.294895	15	14	0.310143		226	209	104	0.0436436
1869.02	5350.39	238	197	92	0.567367	0.570466	0.567367	0.570466	15	14	0.590745		233	202	97	0.349149	0.726978	0.349149	0.726978	15	14	0.747192		253	182	77	1.22202	0.221701	1.22202	0.221701	15	14	0.234007		247	188	83	0.960159	0.336976	0.960159	0.336976	15	14	0.353554		225	210	105	0
1870.95	5344.87	237	198	93	0.523723	0.600472	0.523723	0.600472	15	14	0.620867		232	203	98	0.305505	0.759982	0.305505	0.759982	15	14	0.779995		255	180	75	1.30931	0.190431	1.30931	0.190431	15	14	0.201205		244	191	86	0.829228	0.406976	0.829228	0.406976	15	14	0.425262		223	212	103	-0.0872872
1872.88	5339.37	234	201	96	0.392792	0.694473	0.392792	0.694473	15	14	0.71483		228	207	102	0.130931	0.89583	0.130931	0.89583	15	14	0.914475		255	180	75	1.30931	0.190431	1.30931	0.190431	15	14	0.201205		246	189	84	0.916515	0.359397	0.916515	0.359397	15	14	0.376588		222	213	102	-0.130931
1874.81	5333.88	235	200	95	0.436436	0.662521	0.436436	0.662521	15	14	0.682954		228	207	102	0.130931	0.89583	0.130931	0.89583	15	14	0.914475		256	179	74	1.35295	0.176072	1.35295	0.176072	15	14	0.186083		246	189	84	0.916515	0.359397	0.916515	0.359397	15	14	0.376588		222	213	102	-0.130931
1876.74	5328.39	236	199	94	0.480079	0.631171	0.480079	0.631171	15	14	0.651619		229	206	101	0.174574	0.861414	0.174574	0.861414	15	14	0.880478		255	180	75	1.30931	0.190431	1.30931	0.190431	15	14	0.201205		246	189	84	0.916515	0.359397	0.916515	0.359397	15	14	0.376588		223	212	103	-0.0872872
1878.67	5322.92	237	198	93	0.523723	0.600472	0.523723	0.600472	15	14	0.620867		229	206	101	0.174574	0.861414	0.174574	0.861414	15	14	0.880478		255	180	75	1.30931	0.190431	1.30931	0.190431	15	14	0.201205		246	189	84	0.916515	0.359397	0.916515	0.359397	15	14	0.376588		223	212	103	-0.0872872
1880.6	5317.46	237	198	93	0.523723	0.600472	0.523723	0.600472	15	14	0.620867		228	207	102	0.130931	0.89583	0.130931	0.89583	15	14	0.914475		254	181	76	1.26566	0.205634	1.26566	0.205634	15	14	0.217176		245	190	85	0.872872	0.382734	0.872872	0.382734	15	14	0.400494		222	213	102	-0.130931
1882.52	5312.02	235	200	95	0.436436	0.662521	0.436436	0.662521	15	14	0.682954		228	207	102	0.130931	0.89583	0.130931	0.89583	15	14	0.914475		254	181	76	1.26566	0.205634	1.26566	0.205634	15	14	0.217176		245	190	85	0.872872	0.382734	0.872872	0.382734	15	14	0.400494		222	213	102	-0.130931
1884.45	5306.58	236	199	94	0.480079	0.631171	0.480079	0.631171	15	14	0.651619		228	207	102	0.130931	0.89583	0.130931	0.89583	15	14	0.914475		254	181	76	1.26566	0.205634	1.26566	0.205634	15	14	0.217176		245	190	85	0.872872	0.382734	0.872872	0.382734	15	14	0.400494		223	212	103	-0.0872872
1886.38	5301.15	237	198	93	0.523723	0.600472	0.523723	0.600472	15	14	0.620867		229	206	101	0.174574	0.861414	0.174574	0.861414	15	14	0.880478		256	179	74	1.35295	0.176072	1.35295	0.176072	15	14	0.186083		247	188	83	0.960159	0.336976	0.960159	0.336976	15	14	0.353554		225	210	105	0
1888.31	5295.74	238	197	92	0.567367	0.570466	0.567367	0.570466	15	14	0.590745		230	205	100	0.218218	0.827259	0.218218	0.827259	15	14	0.846694		257	178	73	1.39659	0.162537	1.39659	0.162537	15	14	0.171789		246	189	84	0.916515	0.359397	0.916515	0.359397	15	14	0.376588		227	208	103	0.0872872
1890.24	5290.33	237	198	93	0.523723	0.600472	0.523723	0.600472	15	14	0.620867		230	205	100	0.218218	0.827259	0.218218	0.827259	15	14	0.846694		255	180	75	1.30931	0.190431	1.30931	0.190431	15	14	0.201205		245	190	85	0.872872	0.382734	0.872872	0.382734	15	14	0.400494		224	211	104	-0.0436436
1892.17	5284.94	238	197	92	0.567367	0.570466	0.567367	0.570466	15	14	0.590745		229	206	101	0.174574	0.861414	0.174574	0.861414	15	14	0.880478		255	180	75	1.30931	0.190431	1.30931	0.190431	15	14	0.201205		245	190	85	0.872872	0.382734	0.872872	0.382734	15	14	0.400494		225	210	105	0
1894.1	5279.56	237	198	93	0.523723	0.600472	0.523723	0.600472	15	14	0.620867		230	205	100	0.218218	0.827259	0.218218	0.827259	15	14	0.846694		255	180	75	1.30931	0.190431	1.30931	0.190431	15	14	0.201205		246	189	84	0.916515	0.359397	0.916515	0.359397	15	14	0.376588		225	210	105	0
1896.03	5274.19	238	197	92	0.567367	0.570466	0.567367	0.570466	15	14	0.590745		229	206	101	0.174574	0.861414	0.174574	0.861414	15	14	0.880478		255	180	75	1.30931	0.190431	1.30931	0.190431	15	14	0.201205		246	189	84	0.916515	0.359397	0.916515	0.359397	15	14	0.376588		225	210	105	0
1897.95	5268.83	237	198	93	0.523723	0.600472	0.523723	0.600472	15	14	0.620867		229	206	101	0.174574	0.861414	0.174574	0.861414	15	14	0.880478		255	180	75	1.30931	0.190431	1.30931	0.190431	15	14	0.201205		246	189	84	0.916515	0.359397	0.916515	0.359397	15	14	0.376588		224	211	104	-0.0436436
1899.88	5263.48	237	198	93	0.523723	0.600472	0.523723	0.600472	15	14	0.620867		229	206	101	0.174574	0.861414	0.174574	0.861414	15	14	0.880478		256	179	74	1.35295	0.176072	1.35295	0.176072	15	14	0.186083		246	189	84	0.916515	0.359397	0.916515	0.359397	15	14	0.376588		224	211	104	-0.0436436
1901.81	5258.14	237	198	93	0.523723	0.600472	0.523723	0.600472	15	14	0.620867		229	206	101	0.174574	0.861414	0.174574	0.861414	15	14	0.880478		256	179	74	1.35295	0.176072	1.35295	0.176072	15	14	0.186083		246	189	84	0.916515	0.359397	0.916515	0.359397	15	14	0.376588		225	210	105	0
1903.74	5252.81	238	197	92	0.567367	0.570466	0.567367	0.570466	15	14	0.590745		228	207	102	0.130931	0.89583	0.130931	0.89583	15	14	0.914475		255	180	75	1.30931	0.190431	1.30931	0.190431	15	14	0.201205		246	189	84	0.916515	0.359397	0.916515	0.359397	15	14	0.376588		223	212	103	-0.0872872
1905.67	5247.5	237	198	93	0.523723	0.600472	0.523723	0.600472	15	14	0.620867		227	208	103	0.0872872	0.930443	0.0872872	0.930443	15	14	0.948623		255	180	75	1.30931	0.190431	1.30931	0.190431	15	14	0.201205		245	190	85	0.872872	0.382734	0.872872	0.382734	15	14	0.400494		224	211	104	-0.0436436
1907.6	5242.19	238	197	92	0.567367	0.570466	0.567367	0.570466	15	14	0.590745		228	207	102	0.130931	0.89583	0.130931	0.89583	15	14	0.914475		255	180	75	1.30931	0.190431	1.30931	0.190431	15	14	0.201205		246	189	84	0.916515	0.359397	0.916515	0.359397	15	14	0.376588		228	207	102	0.130931
1909.53	5236.9	239	196	91	0.61101	0.541193	0.61101	0.541193	15	14	0.561291		228	207	102	0.130931	0.89583	0.130931	0.89583	15	14	0.914475		253	182	77	1.22202	0.221701	1.22202	0.221701	15	14	0.234007		246	189	84	0.916515	0.359397	0.916515	0.359397	15	14	0.376588		226	209	104	0.0436436
1911.46	5231.61	239	196	91	0.61101	0.541193	0.61101	0.541193	15	14	0.561291		227	208	103	0.0872872	0.930443	0.0872872	0.930443	15	14	0.948623		253	182	77	1.22202	0.221701	1.22202	0.221701	15	14	0.234007		246	189	84	0.916515	0.359397	0.916515	0.359397	15	14	0.376588		224	211	104	-0.0436436
1913.39	5226.34	238	197	92	0.567367	0.570466	0.567367	0.570466	15	14	0.590745		227	208	103	0.0872872	0.930443	0.0872872	0.930443	15	14	0.948623		253	182	77	1.22202	0.221701	1.22202	0.221701	15	14	0.234007		246	189	84	0.916515	0.359397	0.916515	0.359397	15	14	0.376588		224	211	104	-0.0436436
1915.31	5221.08	238	197	92	0.567367	0.570466	0.567367	0.570466	15	14	0.590745		226	209	104	0.0436436	0.965189	0.0436436	0.965189	15	14	0.982865		255	180	75	1.30931	0.190431	1.30931	0.190431	15	14	0.201205		247	188	83	0.960159	0.336976	0.960159	0.336976	15	14	0.353554		226	209	104	0.0436436
1917.24	5215.82	238	197	92	0.567367	0.570466	0.567367	0.570466	15	14	0.590745		227	208	103	0.0872872	0.930443	0.0872872	0.930443	15	14	0.948623		253	182	77	1.22202	0.221701	1.22202	0.221701	15	14	0.234007		246	189	84	0.916515	0.359397	0.916515	0.359397	15	14	0.376588		225	210	105	0
1919.17	5210.58	237	198	93	0.523723	0.600472	0.523723	0.600472	15	14	0.620867		227	208	103	0.0872872	0.930443	0.0872872	0.930443	15	14	0.948623		253	182	77	1.22202	0.221701	1.22202	0.221701	15	14	0.234007		245	190	85	0.872872	0.382734	0.872872	0.382734	15	14	0.400494		226	209	104	0.0436436
1921.1	5205.35	238	197	92	0.567367	0.570466	0.567367	0.570466	15	14	0.590745		228	207	102	0.130931	0.89583	0.130931	0.89583	15	14	0.914475		254	181	76	1.26566	0.205634	1.26566	0.205634	15	14	0.217176		245	190	85	0.872872	0.382734	0.872872	0.382734	15	14	0.400494		227	208	103	0.0872872
1923.03	5200.13	238	197	92	0.567367	0.570466	0.567367	0.570466	15	14	0.590745		226	209	104	0.0436436	0.965189	0.0436436	0.965189	15	14	0.982865		253	182	77	1.22202	0.221701	1.22202	0.221701	15	14	0.234007		247	188	83	0.960159	0.336976	0.960159	0.336976	15	14	0.353554		225	210	105	0
1924.96	5194.92	239	196	91	0.61101	0.541193	0.61101	0.541193	15	14	0.561291		225	210	105	0	1	0	1	15	14	1.01714		252	183	78	1.17838	0.238647	1.17838	0.238647	15	14	0.251712		247	188	83	0.960159	0.336976	0.960159	0.336976	15	14	0.353554		223	212	103	-0.0872872
1926.89	5189.72	238	197	92	0.567367	0.570466	0.567367	0.570466	15	14	0.590745		224	211	104	-0.0436436	0.965189	-0.0436436	0.965189	15	14	0.982865		251	184	79	1.13473	0.256488	1.13473	0.256488	15	14	0.270299		247	188	83	0.960159	0.336976	0.960159	0.336976	15	14	0.353554		221	214	101	-0.174574
1928.82	5184.53	239	196	91	0.61101	0.541193	0.61101	0.541193	15	14	0.561291		224	211	104	-0.0436436	0.965189	-0.0436436	0.965189	15	14	0.982865		251	184	79	1.13473	0.256488	1.13473	0.256488	15	14	0.270299		247	188	83	0.960159	0.336976	0.960159	0.336976	15	14	0.353554		221	214	101	-0.174574
1930.74	5179.35	237	198	93	0.523723	0.600472	0.523723	0.600472	15	14	0.620867		224	211	104	-0.0436436	0.965189	-0.0436436	0.965189	15	14	0.982865		252	183	78	1.17838	0.238647	1.17838	0.238647	15	14	0.251712		247	188	83	0.960159	0.336976	0.960159	0.336976	15	14	0.353554		222	213	102	-0.130931
1932.67	5174.18	237	198	93	0.523723	0.600472	0.523723	0.600472	15	14	0.620867		222	213	102	-0.130931	0.89583	-0.130931	0.89583	15	14	0.914475		252	183	78	1.17838	0.238647	1.17838	0.238647	15	14	0.251712		246	189	84	0.916515	0.359397	0.916515	0.359397	15	14	0.376588		222	213	102	-0.130931
1934.6	5169.02	236	199	94	0.480079	0.631171	0.480079	0.631171	15	14	0.651619		222	213	102	-0.130931	0.89583	-0.130931	0.89583	15	14	0.914475		252	183	78	1.17838	0.238647	1.17838	0.238647	15	14	0.251712		244	191	86	0.829228	0.406976	0.829228	0.406976	15	14	0.425262		222	213	102	-0.130931
1936.53	5163.87	239	196	91	0.61101	0.541193	0.61101	0.541193	15	14	0.561291		222	213	102	-0.130931	0.89583	-0.130931	0.89583	15	14	0.914475		253	182	77	1.22202	0.221701	1.22202	0.221701	15	14	0.234007		246	189	84	0.916515	0.359397	0.916515	0.359397	15	14	0.376588		221	214	101	-0.174574
1938.46	5158.73	238	197	92	0.567367	0.570466	0.567367	0.570466	15	14	0.590745		223	212	103	-0.0872872	0.930443	-0.0872872	0.930443	15	14	0.948623		254	181	76	1.26566	0.205634	1.26566	0.205634	15	14	0.217176		247	188	83	0.960159	0.336976	0.960159	0.336976	15	14	0.353554		221	214	101	-0.174574
1940.39	5153.61	238	197	92	0.567367	0.570466	0.567367	0.570466	15	14	0.590745		225	210	105	0	1	0	1	15	14	1.01714		254	181	76	1.26566	0.205634	1.26566	0.205634	15	14	0.217176		247	188	83	0.960159	0.336976	0.960159	0.336976	15	14	0.353554		223	212	103	-0.0872872
1942.32	5148.49	237	198	93	0.523723	0.600472	0.523723	0.600472	15	14	0.620867		223	212	103	-0.0872872	0.930443	-0.0872872	0.930443	15	14	0.948623		253	182	77	1.22202	0.221701	1.22202	0.221701	15	14	0.234007		247	188	83	0.960159	0.336976	0.960159	0.336976	15	14	0.353554		224	211	104	-0.0436436
1944.25	5143.38	236	199	94	0.480079	0.631171	0.480079	0.631171	15	14	0.651619		222	213	102	-0.130931	0.89583	-0.130931	0.89583	15	14	0.914475		253	182	77	1.22202	0.221701	1.22202	0.221701	15	14	0.234007		247	188	83	0.960159	0.336976	0.960159	0.336976	15	14	0.353554		223	212	103	-0.0872872
1946.18	5138.28	238	197	92	0.567367	0.570466	0.567367	0.570466	15	14	0.590745		223	212	103	-0.0872872	0.930443	-0.0872872	0.930443	15	14	0.948623		254	181	76	1.26566	0.205634	1.26566	0.205634	15	14	0.217176		246	189	84	0.916515	0.359397	0.916515	0.359397	15	14	0.376588		222	213	102	-0.130931
1948.1	5133.2	238	197	92	0.567367	0.570466	0.567367	0.570466	15	14	0.590745		223	212	103	-0.0872872	0.930443	-0.0872872	0.930443	15	14	0.948623		253	182	77	1.22202	0.221701	1.22202	0.221701	15	14	0.234007		245	190	85	0.872872	0.382734	0.872872	0.382734	15	14	0.400494		222	213	102	-0.130931
1950.03	5128.12	239	196	91	0.61101	0.541193	0.61101	0.541193	15	14	0.561291		223	212	103	-0.0872872	0.930443	-0.0872872	0.930443	15	14	0.948623		253	182	77	1.22202	0.221701	1.22202	0.221701	15	14	0.234007		245	190	85	0.872872	0.382734	0.872872	0.382734	15	14	0.400494		223	212	103	-0.0872872
1951.96	5123.05	239	196	91	0.61101	0.541193	0.61101	0.541193	15	14	0.561291		223	212	103	-0.0872872	0.930443	-0.0872872	0.930443	15	14	0.948623		254	181	76	1.26566	0.205634	1.26566	0.205634	15	14	0.217176		245	190	85	0.872872	0.382734	0.872872	0.382734	15	14	0.400494		223	212	103	-0.0872872
1953.89	5117.99	239	196	91	0.61101	0.541193	0.61101	0.541193	15	14	0.561291		223	212	103	-0.0872872	0.930443	-0.0872872	0.930443	15	14	0.948623		254	181	76	1.26566	0.205634	1.26566	0.205634	15	14	0.217176		247	188	83	0.960159	0.336976	0.960159	0.336976	15	14	0.353554		222	213	102	-0.130931
1955.82	5112.95	238	197	92	0.567367	0.570466	0.567367	0.570466	15	14	0.590745		223	212	103	-0.0872872	0.930443	-0.0872872	0.930443	15	14	0.948623		254	181	76	1.26566	0.205634	1.26566	0.205634	15	14	0.217176		246	189	84	0.916515	0.359397	0.916515	0.359397	15	14	0.376588		222	213	102	-0.130931
1957.75	5107.91	238	197	92	0.567367	0.570466	0.567367	0.570466	15	14	0.590745		222	213	102	-0.130931	0.89583	-0.130931	0.89583	15	14	0.914475		254	181	76	1.26566	0.205634	1.26566	0.205634	15	14	0.217176		245	190	85	0.872872	0.382734	0.872872	0.382734	15	14	0.400494		221	214	101	-0.174574
1959.68	5102.88	239	196	91	0.61101	0.541193	0.61101	0.541193	15	14	0.561291		222	213	102	-0.130931	0.89583	-0.130931	0.89583	15	14	0.914475		254	181	76	1.26566	0.205634	1.26566	0.205634	15	14	0.217176		245	190	85	0.872872	0.382734	0.872872	0.382734	15	14	0.400494		221	214	101	-0.174574
1961.61	5097.86	239	196	91	0.61101	0.541193	0.61101	0.541193	15	14	0.561291		222	213	102	-0.130931	0.89583	-0.130931	0.89583	15	14	0.914475		253	182	77	1.22202	0.221701	1.22202	0.221701	15	14	0.234007		245	190	85	0.872872	0.382734	0.872872	0.382734	15	14	0.400494		221	214	101	-0.174574
1963.53	5092.86	240	195	90	0.654654	0.512691	0.654654	0.512691	15	14	0.532545		224	211	104	-0.0436436	0.965189	-0.0436436	0.965189	15	14	0.982865		253	182	77	1.22202	0.221701	1.22202	0.221701	15	14	0.234007		246	189	84	0.916515	0.359397	0.916515	0.359397	15	14	0.376588		220	215	100	-0.218218
1965.46	5087.86	238	197	92	0.567367	0.570466	0.567367	0.570466	15	14	0.590745		225	210	105	0	1	0	1	15	14	1.01714		254	181	76	1.26566	0.205634	1.26566	0.205634	15	14	0.217176		246	189	84	0.916515	0.359397	0.916515	0.359397	15	14	0.376588		224	211	104	-0.0436436
1967.39	5082.87	239	196	91	0.61101	0.541193	0.61101	0.541193	15	14	0.561291		225	210	105	0	1	0	1	15	14	1.01714		254	181	76	1.26566	0.205634	1.26566	0.205634	15	14	0.217176		246	189	84	0.916515	0.359397	0.916515	0.359397	15	14	0.376588		223	212	103	-0.0872872
1969.32	5077.89	239	196	91	0.61101	0.541193	0.61101	0.541193	15	14	0.561291		224	211	104	-0.0436436	0.965189	-0.0436436	0.965189	15	14	0.982865		254	181	76	1.26566	0.205634	1.26566	0.205634	15	14	0.217176		246	189	84	0.916515	0.359397	0.916515	0.359397	15	14	0.376588		223	212	103	-0.0872872
1971.25	5072.92	240	195	90	0.654654	0.512691	0.654654	0.512691	15	14	0.532545		225	210	105	0	1	0	1	15	14	1.01714		254	181	76	1.26566	0.205634	1.26566	0.205634	15	14	0.217176		246	189	84	0.916515	0.359397	0.916515	0.359397	15	14	0.376588		224	211	104	-0.0436436
1973.18	5067.96	239	196	91	0.61101	0.541193	0.61101	0.541193	15	14	0.561291		226	209	104	0.0436436	0.965189	0.0436436	0.965189	15	14	0.982865		253	182	77	1.22202	0.221701	1.22202	0.221701	15	14	0.234007		246	189	84	0.916515	0.359397	0.916515	0.359397	15	14	0.376588		224	211	104	-0.0436436
1975.11	5063.02	239	196	91	0.61101	0.541193	0.61101	0.541193	15	14	0.561291		226	209	104	0.0436436	0.965189	0.0436436	0.965189	15	14	0.982865		253	182	77	1.22202	0.221701	1.22202	0.221701	15	14	0.234007		246	189	84	0.916515	0.359397	0.916515	0.359397	15	14	0.376588		225	210	105	0
1977.04	5058.08	238	197	92	0.567367	0.570466	0.567367	0.570466	15	14	0.590745		225	210	105	0	1	0	1	15	14	1.01714		253	182	77	1.22202	0.221701	1.22202	0.221701	15	14	0.234007		246	189	84	0.916515	0.359397	0.916515	0.359397	15	14	0.376588		224	211	104	-0.0436436
1978.97	5053.15	239	196	91	0.61101	0.541193	0.61101	0.541193	15	14	0.561291		225	210	105	0	1	0	1	15	14	1.01714		253	182	77	1.22202	0.221701	1.22202	0.221701	15	14	0.234007		246	189	84	0.916515	0.359397	0.916515	0.359397	15	14	0.376588		223	212	103	-0.0872872
1980.89	5048.23	239	196	91	0.61101	0.541193	0.61101	0.541193	15	14	0.561291		226	209	104	0.0436436	0.965189	0.0436436	0.965189	15	14	0.982865		253	182	77	1.22202	0.221701	1.22202	0.221701	15	14	0.234007		246	189	84	0.916515	0.359397	0.916515	0.359397	15	14	0.376588		224	211	104	-0.0436436
1982.82	5043.31	240	195	90	0.654654	0.512691	0.654654	0.512691	15	14	0.532545		226	209	104	0.0436436	0.965189	0.0436436	0.965189	15	14	0.982865		253	182	77	1.22202	0.221701	1.22202	0.221701	15	14	0.234007		246	189	84	0.916515	0.359397	0.916515	0.359397	15	14	0.376588		224	211	104	-0.0436436
1984.75	5038.41	240	195	90	0.654654	0.512691	0.654654	0.512691	15	14	0.532545		226	209	104	0.0436436	0.965189	0.0436436	0.965189	15	14	0.982865		253	182	77	1.22202	0.221701	1.22202	0.221701	15	14	0.234007		246	189	84	0.916515	0.359397	0.916515	0.359397	15	14	0.376588		223	212	103	-0.0872872
1986.68	5033.52	240	195	90	0.654654	0.512691	0.654654	0.512691	15	14	0.532545		228	207	102	0.130931	0.89583	0.130931	0.89583	15	14	0.914475		254	181	76	1.26566	0.205634	1.26566	0.205634	15	14	0.217176		247	188	83	0.960159	0.336976	0.960159	0.336976	15	14	0.353554		223	212	103	-0.0872872
1988.61	5028.64	239	196	91	0.61101	0.541193	0.61101	0.541193	15	14	0.561291		228	207	102	0.130931	0.89583	0.130931	0.89583	15	14	0.914475		254	181	76	1.26566	0.205634	1.26566	0.205634	15	14	0.217176		246	189	84	0.916515	0.359397	0.916515	0.359397	15	14	0.376588		223	212	103	-0.0872872
1990.54	5023.77	239	196	91	0.61101	0.541193	0.61101	0.541193	15	14	0.561291		227	208	103	0.0872872	0.930443	0.0872872	0.930443	15	14	0.948623		254	181	76	1.26566	0.205634	1.26566	0.205634	15	14	0.217176		247	188	83	0.960159	0.336976	0.960159	0.336976	15	14	0.353554		223	212	103	-0.0872872
1992.47	5018.9	239	196	91	0.61101	0.541193	0.61101	0.541193	15	14	0.561291		227	208	103	0.0872872	0.930443	0.0872872	0.930443	15	14	0.948623		254	181	76	1.26566	0.205634	1.26566	0.205634	15	14	0.217176		248	187	82	1.0038	0.315475	1.0038	0.315475	15	14	0.331405		224	211	104	-0.0436436
1994.4	5014.05	240	195	90	0.654654	0.512691	0.654654	0.512691	15	14	0.532545		228	207	102	0.130931	0.89583	0.130931	0.89583	15	14	0.914475		254	181	76	1.26566	0.205634	1.26566	0.205634	15	14	0.217176		247	188	83	0.960159	0.336976	0.960159	0.336976	15	14	0.353554		223	212	103	-0.0872872
1996.32	5009.21	241	194	89	0.698297	0.484992	0.698297	0.484992	15	14	0.504539		229	206	101	0.174574	0.861414	0.174574	0.861414	15	14	0.880478		253	182	77	1.22202	0.221701	1.22202	0.221701	15	14	0.234007		246	189	84	0.916515	0.359397	0.916515	0.359397	15	14	0.376588		223	212	103	-0.0872872
1998.25	5004.37	241	194	89	0.698297	0.484992	0.698297	0.484992	15	14	0.504539		229	206	101	0.174574	0.861414	0.174574	0.861414	15	14	0.880478		253	182	77	1.22202	0.221701	1.22202	0.221701	15	14	0.234007		248	187	82	1.0038	0.315475	1.0038	0.315475	15	14	0.331405		223	212	103	-0.0872872
2000.18	4999.54	240	195	90	0.654654	0.512691	0.654654	0.512691	15	14	0.532545		229	206	101	0.174574	0.861414	0.174574	0.861414	15	14	0.880478		253	182	77	1.22202	0.221701	1.22202	0.221701	15	14	0.234007		247	188	83	0.960159	0.336976	0.960159	0.336976	15	14	0.353554		222	213	102	-0.130931
2002.11	4994.73	239	196	91	0.61101	0.541193	0.61101	0.541193	15	14	0.561291		229	206	101	0.174574	0.861414	0.174574	0.861414	15	14	0.880478		253	182	77	1.22202	0.221701	1.22202	0.221701	15	14	0.234007		246	189	84	0.916515	0.359397	0.916515	0.359397	15	14	0.376588		223	212	103	-0.0872872
2004.04	4989.92	241	194	89	0.698297	0.484992	0.698297	0.484992	15	14	0.504539		229	206	101	0.174574	0.861414	0.174574	0.861414	15	14	0.880478		253	182	77	1.22202	0.221701	1.22202	0.221701	15	14	0.234007		248	187	82	1.0038	0.315475	1.0038	0.315475	15	14	0.331405		223	212	103	-0.0872872
2005.97	4985.12	241	194	89	0.698297	0.484992	0.698297	0.484992	15	14	0.504539		228	207	102	0.130931	0.89583	0.130931	0.89583	15	14	0.914475		253	182	77	1.22202	0.221701	1.22202	0.221701	15	14	0.234007		248	187	82	1.0038	0.315475	1.0038	0.315475	15	14	0.331405		222	213	102	-0.130931
2007.9	4980.33	241	194	89	0.698297	0.484992	0.698297	0.484992	15	14	0.504539		228	207	102	0.130931	0.89583	0.130931	0.89583	15	14	0.914475		252	183	78	1.17838	0.238647	1.17838	0.238647	15	14	0.251712		248	187	82	1.0038	0.315475	1.0038	0.315475	15	14	0.331405		222	213	102	-0.130931
2009.83	4975.55	241	194	89	0.698297	0.484992	0.698297	0.484992	15	14	0.504539		230	205	100	0.218218	0.827259	0.218218	0.827259	15	14	0.846694		252	183	78	1.17838	0.238647	1.17838	0.238647	15	14	0.251712		248	187	82	1.0038	0.315475	1.0038	0.315475	15	14	0.331405		221	214	101	-0.174574
2011.76	4970.78	242	193	88	0.741941	0.458124	0.741941	0.458124	15	14	0.477307		230	205	100	0.218218	0.827259	0.218218	0.827259	15	14	0.846694		252	183	78	1.17838	0.238647	1.17838	0.238647	15	14	0.251712		248	187	82	1.0038	0.315475	1.0038	0.315475	15	14	0.331405		221	214	101	-0.174574
2013.68	4966.02	240	195	90	0.654654	0.512691	0.654654	0.512691	15	14	0.532545		230	205	100	0.218218	0.827259	0.218218	0.827259	15	14	0.846694		252	183	78	1.17838	0.238647	1.17838	0.238647	15	14	0.251712		248	187	82	1.0038	0.315475	1.0038	0.315475	15	14	0.331405		221	214	101	-0.174574
2015.61	4961.27	241	194	89	0.698297	0.484992	0.698297	0.484992	15	14	0.504539		231	204	99	0.261861	0.793428	0.261861	0.793428	15	14	0.813179		251	184	79	1.13473	0.256488	1.13473	0.256488	15	14	0.270299		249	186	81	1.04745	0.294895	1.04745	0.294895	15	14	0.310143		222	213	102	-0.130931
2017.54	4956.53	240	195	90	0.654654	0.512691	0.654654	0.512691	15	14	0.532545		232	203	98	0.305505	0.759982	0.305505	0.759982	15	14	0.779995		253	182	77	1.22202	0.221701	1.22202	0.221701	15	14	0.234007		249	186	81	1.04745	0.294895	1.04745	0.294895	15	14	0.310143		222	213	102	-0.130931
2019.47	4951.79	239	196	91	0.61101	0.541193	0.61101	0.541193	15	14	0.561291		231	204	99	0.261861	0.793428	0.261861	0.793428	15	14	0.813179		252	183	78	1.17838	0.238647	1.17838	0.238647	15	14	0.251712		249	186	81	1.04745	0.294895	1.04745	0.294895	15	14	0.310143		222	213	102	-0.130931
2021.4	4947.07	239	196	91	0.61101	0.541193	0.61101	0.541193	15	14	0.561291		231	204	99	0.261861	0.793428	0.261861	0.793428	15	14	0.813179		252	183	78	1.17838	0.238647	1.17838	0.238647	15	14	0.251712		249	186	81	1.04745	0.294895	1.04745	0.294895	15	14	0.310143		222	213	102	-0.130931
2023.33	4942.35	239	196	91	0.61101	0.541193	0.61101	0.541193	15	14	0.561291		232	203	98	0.305505	0.759982	0.305505	0.759982	15	14	0.779995		251	184	79	1.13473	0.256488	1.13473	0.256488	15	14	0.270299		249	186	81	1.04745	0.294895	1.04745	0.294895	15	14	0.310143		223	212	103	-0.0872872
2025.26	4937.65	238	197	92	0.567367	0.570466	0.567367	0.570466	15	14	0.590745		232	203	98	0.305505	0.759982	0.305505	0.759982	15	14	0.779995		251	184	79	1.13473	0.256488	1.13473	0.256488	15	14	0.270299		249	186	81	1.04745	0.294895	1.04745	0.294895	15	14	0.310143		223	212	103	-0.0872872
2027.19	4932.95	238	197	92	0.567367	0.570466	0.567367	0.570466	15	14	0.590745		233	202	97	0.349149	0.726978	0.349149	0.726978	15	14	0.747192		252	183	78	1.17838	0.238647	1.17838	0.238647	15	14	0.251712		249	186	81	1.04745	0.294895	1.04745	0.294895	15	14	0.310143		223	212	103	-0.0872872
2029.11	4928.26	238	197	92	0.567367	0.570466	0.567367	0.570466	15	14	0.590745		234	201	96	0.392792	0.694473	0.392792	0.694473	15	14	0.71483		253	182	77	1.22202	0.221701	1.22202	0.221701	15	14	0.234007		249	186	81	1.04745	0.294895	1.04745	0.294895	15	14	0.310143		222	213	102	-0.130931
2031.04	4923.58	238	197	92	0.567367	0.570466	0.567367	0.570466	15	14	0.590745		235	200	95	0.436436	0.662521	0.436436	0.662521	15	14	0.682954		253	182	77	1.22202	0.221701	1.22202	0.221701	15	14	0.234007		250	185	80	1.09109	0.275234	1.09109	0.275234	15	14	0.289776		223	212	103	-0.0872872
2032.97	4918.91	240	195	90	0.654654	0.512691	0.654654	0.512691	15	14	0.532545		235	200	95	0.436436	0.662521	0.436436	0.662521	15	14	0.682954		254	181	76	1.26566	0.205634	1.26566	0.205634	15	14	0.217176		252	183	78	1.17838	0.238647	1.17838	0.238647	15	14	0.251712		223	212	103	-0.0872872
2034.9	4914.24	240	195	90	0.654654	0.512691	0.654654	0.512691	15	14	0.532545		235	200	95	0.436436	0.662521	0.436436	0.662521	15	14	0.682954		254	181	76	1.26566	0.205634	1.26566	0.205634	15	14	0.217176		252	183	78	1.17838	0.238647	1.17838	0.238647	15	14	0.251712		223	212	103	-0.0872872
2036.83	4909.59	240	195	90	0.654654	0.512691	0.654654	0.512691	15	14	0.532545		235	200	95	0.436436	0.662521	0.436436	0.662521	15	14	0.682954		254	181	76	1.26566	0.205634	1.26566	0.205634	15	14	0.217176		252	183	78	1.17838	0.238647	1.17838	0.238647	15	14	0.251712		223	212	103	-0.0872872
2038.76	4904.95	239	196	91	0.61101	0.541193	0.61101	0.541193	15	14	0.561291		235	200	95	0.436436	0.662521	0.436436	0.662521	15	14	0.682954		254	181	76	1.26566	0.205634	1.26566	0.205634	15	14	0.217176		251	184	79	1.13473	0.256488	1.13473	0.256488	15	14	0.270299		223	212	103	-0.0872872
2040.69	4900.31	240	195	90	0.654654	0.512691	0.654654	0.512691	15	14	0.532545		236	199	94	0.480079	0.631171	0.480079	0.631171	15	14	0.651619		253	182	77	1.22202	0.221701	1.22202	0.221701	15	14	0.234007		252	183	78	1.17838	0.238647	1.17838	0.238647	15	14	0.251712		225	210	105	0
2042.62	4895.68	239	196	91	0.61101	0.541193	0.61101	0.541193	15	14	0.561291		236	199	94	0.480079	0.631171	0.480079	0.631171	15	14	0.651619		253	182	77	1.22202	0.221701	1.22202	0.221701	15	14	0.234007		251	184	79	1.13473	0.256488	1.13473	0.256488	15	14	0.270299		225	210	105	0
2044.54	4891.06	238	197	92	0.567367	0.570466	0.567367	0.570466	15	14	0.590745		236	199	94	0.480079	0.631171	0.480079	0.631171	15	14	0.651619		254	181	76	1.26566	0.205634	1.26566	0.205634	15	14	0.217176		251	184	79	1.13473	0.256488	1.13473	0.256488	15	14	0.270299		225	210	105	0
2046.47	4886.45	238	197	92	0.567367	0.570466	0.567367	0.570466	15	14	0.590745		236	199	94	0.480079	0.631171	0.480079	0.631171	15	14	0.651619		254	181	76	1.26566	0.205634	1.26566	0.205634	15	14	0.217176		251	184	79	1.13473	0.256488	1.13473	0.256488	15	14	0.270299		225	210	105	0
2048.4	4881.85	239	196	91	0.61101	0.541193	0.61101	0.541193	15	14	0.561291		234	201	96	0.392792	0.694473	0.392792	0.694473	15	14	0.71483		254	181	76	1.26566	0.205634	1.26566	0.205634	15	14	0.217176		252	183	78	1.17838	0.238647	1.17838	0.238647	15	14	0.251712		226	209	104	0.0436436
2050.33	4877.26	238	197	92	0.567367	0.570466	0.567367	0.570466	15	14	0.590745		234	201	96	0.392792	0.694473	0.392792	0.694473	15	14	0.71483		255	180	75	1.30931	0.190431	1.30931	0.190431	15	14	0.201205		252	183	78	1.17838	0.238647	1.17838	0.238647	15	14	0.251712		226	209	104	0.0436436
2052.26	4872.68	237	198	93	0.523723	0.600472	0.523723	0.600472	15	14	0.620867		235	200	95	0.436436	0.662521	0.436436	0.662521	15	14	0.682954		255	180	75	1.30931	0.190431	1.30931	0.190431	15	14	0.201205		253	182	77	1.22202	0.221701	1.22202	0.221701	15	14	0.234007		225	210	105	0
2054.19	4868.1	237	198	93	0.523723	0.600472	0.523723	0.600472	15	14	0.620867		235	200	95	0.436436	0.662521	0.436436	0.662521	15	14	0.682954		255	180	75	1.30931	0.190431	1.30931	0.190431	15	14	0.201205		253	182	77	1.22202	0.221701	1.22202	0.221701	15	14	0.234007		225	210	105	0
2056.12	4863.53	237	198	93	0.523723	0.600472	0.523723	0.600472	15	14	0.620867		235	200	95	0.436436	0.662521	0.436436	0.662521	15	14	0.682954		255	180	75	1.30931	0.190431	1.30931	0.190431	15	14	0.201205		253	182	77	1.22202	0.221701	1.22202	0.221701	15	14	0.234007		226	209	104	0.0436436
2058.05	4858.98	237	198	93	0.523723	0.600472	0.523723	0.600472	15	14	0.620867		236	199	94	0.480079	0.631171	0.480079	0.631171	15	14	0.651619		257	178	73	1.39659	0.162537	1.39659	0.162537	15	14	0.171789		253	182	77	1.22202	0.221701	1.22202	0.221701	15	14	0.234007		226	209	104	0.0436436
2059.98	4854.43	237	198	93	0.523723	0.600472	0.523723	0.600472	15	14	0.620867		236	199	94	0.480079	0.631171	0.480079	0.631171	15	14	0.651619		257	178	73	1.39659	0.162537	1.39659	0.162537	15	14	0.171789		253	182	77	1.22202	0.221701	1.22202	0.221701	15	14	0.234007		228	207	102	0.130931
2061.9	4849.89	237	198	93	0.523723	0.600472	0.523723	0.600472	15	14	0.620867		237	198	93	0.523723	0.600472	0.523723	0.600472	15	14	0.620867		257	178	73	1.39659	0.162537	1.39659	0.162537	15	14	0.171789		255	180	75	1.30931	0.190431	1.30931	0.190431	15	14	0.201205		228	207	102	0.130931
2063.83	4845.35	236	199	94	0.480079	0.631171	0.480079	0.631171	15	14	0.651619		237	198	93	0.523723	0.600472	0.523723	0.600472	15	14	0.620867		257	178	73	1.39659	0.162537	1.39659	0.162537	15	14	0.171789		256	179	74	1.35295	0.176072	1.35295	0.176072	15	14	0.186083		228	207	102	0.130931
2065.76	4840.83	236	199	94	0.480079	0.631171	0.480079	0.631171	15	14	0.651619		237	198	93	0.523723	0.600472	0.523723	0.600472	15	14	0.620867		256	179	74	1.35295	0.176072	1.35295	0.176072	15	14	0.186083		256	179	74	1.35295	0.176072	1.35295	0.176072	15	14	0.186083		229	206	101	0.174574
2067.69	4836.31	237	198	93	0.523723	0.600472	0.523723	0.600472	15	14	0.620867		236	199	94	0.480079	0.631171	0.480079	0.631171	15	14	0.651619		256	179	74	1.35295	0.176072	1.35295	0.176072	15	14	0.186083		256	179	74	1.35295	0.176072	1.35295	0.176072	15	14	0.186083		227	208	103	0.0872872
2069.62	4831.81	236	199	94	0.480079	0.631171	0.480079	0.631171	15	14	0.651619		236	199	94	0.480079	0.631171	0.480079	0.631171	15	14	0.651619		256	179	74	1.35295	0.176072	1.35295	0.176072	15	14	0.186083		256	179	74	1.35295	0.176072	1.35295	0.176072	15	14	0.186083		227	208	103	0.0872872
2071.55	4827.31	236	199	94	0.480079	0.631171	0.480079	0.631171	15	14	0.651619		236	199	94	0.480079	0.631171	0.480079	0.631171	15	14	0.651619		256	179	74	1.35295	0.176072	1.35295	0.176072	15	14	0.186083		257	178	73	1.39659	0.162537	1.39659	0.162537	15	14	0.171789		227	208	103	0.0872872
2073.48	4822.82	236	199	94	0.480079	0.631171	0.480079	0.631171	15	14	0.651619		236	199	94	0.480079	0.631171	0.480079	0.631171	15	14	0.651619		256	179	74	1.35295	0.176072	1.35295	0.176072	15	14	0.186083		257	178	73	1.39659	0.162537	1.39659	0.162537	15	14	0.171789		227	208	103	0.0872872
2075.41	4818.33	236	199	94	0.480079	0.631171	0.480079	0.631171	15	14	0.651619		238	197	92	0.567367	0.570466	0.567367	0.570466	15	14	0.590745		256	179	74	1.35295	0.176072	1.35295	0.176072	15	14	0.186083		257	178	73	1.39659	0.162537	1.39659	0.162537	15	14	0.171789		227	208	103	0.0872872
2077.33	4813.86	235	200	95	0.436436	0.662521	0.436436	0.662521	15	14	0.682954		238	197	92	0.567367	0.570466	0.567367	0.570466	15	14	0.590745		256	179	74	1.35295	0.176072	1.35295	0.176072	15	14	0.186083		257	178	73	1.39659	0.162537	1.39659	0.162537	15	14	0.171789		227	208	103	0.0872872
2079.26	4809.39	237	198	93	0.523723	0.600472	0.523723	0.600472	15	14	0.620867		237	198	93	0.523723	0.600472	0.523723	0.600472	15	14	0.620867		255	180	75	1.30931	0.190431	1.30931	0.190431	15	14	0.201205		258	177	72	1.44024	0.149801	1.44024	0.149801	15	14	0.158309		227	208	103	0.0872872
2081.19	4804.94	236	199	94	0.480079	0.631171	0.480079	0.631171	15	14	0.651619		237	198	93	0.523723	0.600472	0.523723	0.600472	15	14	0.620867		254	181	76	1.26566	0.205634	1.26566	0.205634	15	14	0.217176		257	178	73	1.39659	0.162537	1.39659	0.162537	15	14	0.171789		227	208	103	0.0872872
2083.12	4800.49	237	198	93	0.523723	0.600472	0.523723	0.600472	15	14	0.620867		236	199	94	0.480079	0.631171	0.480079	0.631171	15	14	0.651619		254	181	76	1.26566	0.205634	1.26566	0.205634	15	14	0.217176		257	178	73	1.39659	0.162537	1.39659	0.162537	15	14	0.171789		227	208	103	0.0872872
2085.05	4796.05	236	199	94	0.480079	0.631171	0.480079	0.631171	15	14	0.651619		237	198	93	0.523723	0.600472	0.523723	0.600472	15	14	0.620867		254	181	76	1.26566	0.205634	1.26566	0.205634	15	14	0.217176		258	177	72	1.44024	0.149801	1.44024	0.149801	15	14	0.158309		227	208	103	0.0872872
2086.98	4791.62	236	199	94	0.480079	0.631171	0.480079	0.631171	15	14	0.651619		237	198	93	0.523723	0.600472	0.523723	0.600472	15	14	0.620867		254	181	76	1.26566	0.205634	1.26566	0.205634	15	14	0.217176		259	176	71	1.48388	0.137841	1.48388	0.137841	15	14	0.145619		227	208	103	0.0872872
2088.91	4787.19	237	198	93	0.523723	0.600472	0.523723	0.600472	15	14	0.620867		237	198	93	0.523723	0.600472	0.523723	0.600472	15	14	0.620867		254	181	76	1.26566	0.205634	1.26566	0.205634	15	14	0.217176		258	177	72	1.44024	0.149801	1.44024	0.149801	15	14	0.158309		228	207	102	0.130931
2090.84	4782.77	237	198	93	0.523723	0.600472	0.523723	0.600472	15	14	0.620867		237	198	93	0.523723	0.600472	0.523723	0.600472	15	14	0.620867		254	181	76	1.26566	0.205634	1.26566	0.205634	15	14	0.217176		258	177	72	1.44024	0.149801	1.44024	0.149801	15	14	0.158309		228	207	102	0.130931
2092.77	4778.37	237	198	93	0.523723	0.600472	0.523723	0.600472	15	14	0.620867		237	198	93	0.523723	0.600472	0.523723	0.600472	15	14	0.620867		254	181	76	1.26566	0.205634	1.26566	0.205634	15	14	0.217176		258	177	72	1.44024	0.149801	1.44024	0.149801	15	14	0.158309		228	207	102	0.130931
2094.69	4773.97	236	199	94	0.480079	0.631171	0.480079	0.631171	15	14	0.651619		237	198	93	0.523723	0.600472	0.523723	0.600472	15	14	0.620867		254	181	76	1.26566	0.205634	1.26566	0.205634	15	14	0.217176		259	176	71	1.48388	0.137841	1.48388	0.137841	15	14	0.145619		228	207	102	0.130931
2096.62	4769.57	236	199	94	0.480079	0.631171	0.480079	0.631171	15	14	0.651619		237	198	93	0.523723	0.600472	0.523723	0.600472	15	14	0.620867		254	181	76	1.26566	0.205634	1.26566	0.205634	15	14	0.217176		260	175	70	1.52753	0.126631	1.52753	0.126631	15	14	0.1337		228	207	102	0.130931
2098.55	4765.19	237	198	93	0.523723	0.600472	0.523723	0.600472	15	14	0.620867		236	199	94	0.480079	0.631171	0.480079	0.631171	15	14	0.651619		254	181	76	1.26566	0.205634	1.26566	0.205634	15	14	0.217176		260	175	70	1.52753	0.126631	1.52753	0.126631	15	14	0.1337		228	207	102	0.130931
2100.48	4760.82	237	198	93	0.523723	0.600472	0.523723	0.600472	15	14	0.620867		236	199	94	0.480079	0.631171	0.480079	0.631171	15	14	0.651619		254	181	76	1.26566	0.205634	1.26566	0.205634	15	14	0.217176		260	175	70	1.52753	0.126631	1.52753	0.126631	15	14	0.1337		228	207	102	0.130931
2102.41	4756.45	237	198	93	0.523723	0.600472	0.523723	0.600472	15	14	0.620867		236	199	94	0.480079	0.631171	0.480079	0.631171	15	14	0.651619		255	180	75	1.30931	0.190431	1.30931	0.190431	15	14	0.201205		261	174	69	1.57117	0.116144	1.57117	0.116144	15	14	0.122524		228	207	102	0.130931
2104.34	4752.09	237	198	93	0.523723	0.600472	0.523723	0.600472	15	14	0.620867		236	199	94	0.480079	0.631171	0.480079	0.631171	15	14	0.651619		255	180	75	1.30931	0.190431	1.30931	0.190431	15	14	0.201205		261	174	69	1.57117	0.116144	1.57117	0.116144	15	14	0.122524		228	207	102	0.130931
2106.27	4747.74	237	198	93	0.523723	0.600472	0.523723	0.600472	15	14	0.620867		236	199	94	0.480079	0.631171	0.480079	0.631171	15	14	0.651619		255	180	75	1.30931	0.190431	1.30931	0.190431	15	14	0.201205		261	174	69	1.57117	0.116144	1.57117	0.116144	15	14	0.122524		228	207	102	0.130931
2108.2	4743.39	238	197	92	0.567367	0.570466	0.567367	0.570466	15	14	0.590745		236	199	94	0.480079	0.631171	0.480079	0.631171	15	14	0.651619		256	179	74	1.35295	0.176072	1.35295	0.176072	15	14	0.186083		262	173	68	1.61481	0.106352	1.61481	0.106352	15	14	0.11207		228	207	102	0.130931
2110.12	4739.06	238	197	92	0.567367	0.570466	0.567367	0.570466	15	14	0.590745		237	198	93	0.523723	0.600472	0.523723	0.600472	15	14	0.620867		256	179	74	1.35295	0.176072	1.35295	0.176072	15	14	0.186083		262	173	68	1.61481	0.106352	1.61481	0.106352	15	14	0.11207		229	206	101	0.174574
2112.05	4734.73	238	197	92	0.567367	0.570466	0.567367	0.570466	15	14	0.590745		238	197	92	0.567367	0.570466	0.567367	0.570466	15	14	0.590745		255	180	75	1.30931	0.190431	1.30931	0.190431	15	14	0.201205		261	174	69	1.57117	0.116144	1.57117	0.116144	15	14	0.122524		229	206	101	0.174574
2113.98	4730.41	238	197	92	0.567367	0.570466	0.567367	0.570466	15	14	0.590745		239	196	91	0.61101	0.541193	0.61101	0.541193	15	14	0.561291		256	179	74	1.35295	0.176072	1.35295	0.176072	15	14	0.186083		261	174	69	1.57117	0.116144	1.57117	0.116144	15	14	0.122524		229	206	101	0.174574
2115.91	4726.1	236	199	94	0.480079	0.631171	0.480079	0.631171	15	14	0.651619		240	195	90	0.654654	0.512691	0.654654	0.512691	15	14	0.532545		256	179	74	1.35295	0.176072	1.35295	0.176072	15	14	0.186083		261	174	69	1.57117	0.116144	1.57117	0.116144	15	14	0.122524		229	206	101	0.174574
2117.84	4721.79	236	199	94	0.480079	0.631171	0.480079	0.631171	15	14	0.651619		241	194	89	0.698297	0.484992	0.698297	0.484992	15	14	0.504539		257	178	73	1.39659	0.162537	1.39659	0.162537	15	14	0.171789		261	174	69	1.57117	0.116144	1.57117	0.116144	15	14	0.122524		230	205	100	0.218218
2119.77	4717.5	237	198	93	0.523723	0.600472	0.523723	0.600472	15	14	0.620867		243	192	87	0.785584	0.432112	0.785584	0.432112	15	14	0.450872		258	177	72	1.44024	0.149801	1.44024	0.149801	15	14	0.158309		261	174	69	1.57117	0.116144	1.57117	0.116144	15	14	0.122524		230	205	100	0.218218
2121.7	4713.21	237	198	93	0.523723	0.600472	0.523723	0.600472	15	14	0.620867		244	191	86	0.829228	0.406976	0.829228	0.406976	15	14	0.425262		257	178	73	1.39659	0.162537	1.39659	0.162537	15	14	0.171789		261	174	69	1.57117	0.116144	1.57117	0.116144	15	14	0.122524		230	205	100	0.218218
2123.63	4708.93	237	198	93	0.523723	0.600472	0.523723	0.600472	15	14	0.620867		244	191	86	0.829228	0.406976	0.829228	0.406976	15	14	0.425262		257	178	73	1.39659	0.162537	1.39659	0.162537	15	14	0.171789		261	174	69	1.57117	0.116144	1.57117	0.116144	15	14	0.122524		230	205	100	0.218218
2125.56	4704.65	237	198	93	0.523723	0.600472	0.523723	0.600472	15	14	0.620867		244	191	86	0.829228	0.406976	0.829228	0.406976	15	14	0.425262		257	178	73	1.39659	0.162537	1.39659	0.162537	15	14	0.171789		261	174	69	1.57117	0.116144	1.57117	0.116144	15	14	0.122524		231	204	99	0.261861
2127.48	4700.39	237	198	93	0.523723	0.600472	0.523723	0.600472	15	14	0.620867		244	191	86	0.829228	0.406976	0.829228	0.406976	15	14	0.425262		257	178	73	1.39659	0.162537	1.39659	0.162537	15	14	0.171789		261	174	69	1.57117	0.116144	1.57117	0.116144	15	14	0.122524		231	204	99	0.261861
2129.41	4696.13	237	198	93	0.523723	0.600472	0.523723	0.600472	15	14	0.620867		244	191	86	0.829228	0.406976	0.829228	0.406976	15	14	0.425262		258	177	72	1.44024	0.149801	1.44024	0.149801	15	14	0.158309		261	174	69	1.57117	0.116144	1.57117	0.116144	15	14	0.122524		231	204	99	0.261861
2131.34	4691.88	237	198	93	0.523723	0.600472	0.523723	0.600472	15	14	0.620867		244	191	86	0.829228	0.406976	0.829228	0.406976	15	14	0.425262		258	177	72	1.44024	0.149801	1.44024	0.149801	15	14	0.158309		261	174	69	1.57117	0.116144	1.57117	0.116144	15	14	0.122524		231	204	99	0.261861
2133.27	4687.64	237	198	93	0.523723	0.600472	0.523723	0.600472	15	14	0.620867		244	191	86	0.829228	0.406976	0.829228	0.406976	15	14	0.425262		258	177	72	1.44024	0.149801	1.44024	0.149801	15	14	0.158309		262	173	68	1.61481	0.106352	1.61481	0.106352	15	14	0.11207		231	204	99	0.261861
2135.2	4683.4	237	198	93	0.523723	0.600472	0.523723	0.600472	15	14	0.620867		245	190	85	0.872872	0.382734	0.872872	0.382734	15	14	0.400494		259	176	71	1.48388	0.137841	1.48388	0.137841	15	14	0.145619		263	172	67	1.65846	0.0972264	1.65846	0.0972264	15	14	0.102309		231	204	99	0.261861
2137.13	4679.18	234	201	96	0.392792	0.694473	0.392792	0.694473	15	14	0.71483		245	190	85	0.872872	0.382734	0.872872	0.382734	15	14	0.400494		258	177	72	1.44024	0.149801	1.44024	0.149801	15	14	0.158309		263	172	67	1.65846	0.0972264	1.65846	0.0972264	15	14	0.102309		232	203	98	0.305505
2139.06	4674.96	234	201	96	0.392792	0.694473	0.392792	0.694473	15	14	0.71483		244	191	86	0.829228	0.406976	0.829228	0.406976	15	14	0.425262		258	177	72	1.44024	0.149801	1.44024	0.149801	15	14	0.158309		264	171	66	1.7021	0.0887377	1.7021	0.0887377	15	14	0.0932157		232	203	98	0.305505
2140.99	4670.75	235	200	95	0.436436	0.662521	0.436436	0.662521	15	14	0.682954		244	191	86	0.829228	0.406976	0.829228	0.406976	15	14	0.425262		258	177	72	1.44024	0.149801	1.44024	0.149801	15	14	0.158309		263	172	67	1.65846	0.0972264	1.65846	0.0972264	15	14	0.102309		231	204	99	0.261861
2142.91	4666.54	235	200	95	0.436436	0.662521	0.436436	0.662521	15	14	0.682954		244	191	86	0.829228	0.406976	0.829228	0.406976	15	14	0.425262		258	177	72	1.44024	0.149801	1.44024	0.149801	15	14	0.158309		262	173	68	1.61481	0.106352	1.61481	0.106352	15	14	0.11207		231	204	99	0.261861
2144.84	4662.35	235	200	95	0.436436	0.662521	0.436436	0.662521	15	14	0.682954		244	191	86	0.829228	0.406976	0.829228	0.406976	15	14	0.425262		258	177	72	1.44024	0.149801	1.44024	0.149801	15	14	0.158309		263	172	67	1.65846	0.0972264	1.65846	0.0972264	15	14	0.102309		231	204	99	0.261861
2146.77	4658.16	236	199	94	0.480079	0.631171	0.480079	0.631171	15	14	0.651619		244	191	86	0.829228	0.406976	0.829228	0.406976	15	14	0.425262		258	177	72	1.44024	0.149801	1.44024	0.149801	15	14	0.158309		263	172	67	1.65846	0.0972264	1.65846	0.0972264	15	14	0.102309		231	204	99	0.261861
2148.7	4653.97	236	199	94	0.480079	0.631171	0.480079	0.631171	15	14	0.651619		244	191	86	0.829228	0.406976	0.829228	0.406976	15	14	0.425262		258	177	72	1.44024	0.149801	1.44024	0.149801	15	14	0.158309		263	172	67	1.65846	0.0972264	1.65846	0.0972264	15	14	0.102309		232	203	98	0.305505
2150.63	4649.8	236	199	94	0.480079	0.631171	0.480079	0.631171	15	14	0.651619		244	191	86	0.829228	0.406976	0.829228	0.406976	15	14	0.425262		258	177	72	1.44024	0.149801	1.44024	0.149801	15	14	0.158309		262	173	68	1.61481	0.106352	1.61481	0.106352	15	14	0.11207		234	201	96	0.392792
2152.56	4645.63	235	200	95	0.436436	0.662521	0.436436	0.662521	15	14	0.682954		244	191	86	0.829228	0.406976	0.829228	0.406976	15	14	0.425262		258	177	72	1.44024	0.149801	1.44024	0.149801	15	14	0.158309		262	173	68	1.61481	0.106352	1.61481	0.106352	15	14	0.11207		234	201	96	0.392792
2154.49	4641.48	235	200	95	0.436436	0.662521	0.436436	0.662521	15	14	0.682954		244	191	86	0.829228	0.406976	0.829228	0.406976	15	14	0.425262		258	177	72	1.44024	0.149801	1.44024	0.149801	15	14	0.158309		263	172	67	1.65846	0.0972264	1.65846	0.0972264	15	14	0.102309		234	201	96	0.392792
2156.42	4637.32	235	200	95	0.436436	0.662521	0.436436	0.662521	15	14	0.682954		244	191	86	0.829228	0.406976	0.829228	0.406976	15	14	0.425262		258	177	72	1.44024	0.149801	1.44024	0.149801	15	14	0.158309		263	172	67	1.65846	0.0972264	1.65846	0.0972264	15	14	0.102309		234	201	96	0.392792
2158.35	4633.18	235	200	95	0.436436	0.662521	0.436436	0.662521	15	14	0.682954		244	191	86	0.829228	0.406976	0.829228	0.406976	15	14	0.425262		258	177	72	1.44024	0.149801	1.44024	0.149801	15	14	0.158309		263	172	67	1.65846	0.0972264	1.65846	0.0972264	15	14	0.102309		234	201	96	0.392792
2160.27	4629.04	235	200	95	0.436436	0.662521	0.436436	0.662521	15	14	0.682954		244	191	86	0.829228	0.406976	0.829228	0.406976	15	14	0.425262		258	177	72	1.44024	0.149801	1.44024	0.149801	15	14	0.158309		262	173	68	1.61481	0.106352	1.61481	0.106352	15	14	0.11207		234	201	96	0.392792
2162.2	4624.91	235	200	95	0.436436	0.662521	0.436436	0.662521	15	14	0.682954		245	190	85	0.872872	0.382734	0.872872	0.382734	15	14	0.400494		259	176	71	1.48388	0.137841	1.48388	0.137841	15	14	0.145619		262	173	68	1.61481	0.106352	1.61481	0.106352	15	14	0.11207		234	201	96	0.392792
2164.13	4620.79	234	201	96	0.392792	0.694473	0.392792	0.694473	15	14	0.71483		244	191	86	0.829228	0.406976	0.829228	0.406976	15	14	0.425262		258	177	72	1.44024	0.149801	1.44024	0.149801	15	14	0.158309		262	173	68	1.61481	0.106352	1.61481	0.106352	15	14	0.11207		234	201	96	0.392792
2166.06	4616.68	234	201	96	0.392792	0.694473	0.392792	0.694473	15	14	0.71483		244	191	86	0.829228	0.406976	0.829228	0.406976	15	14	0.425262		258	177	72	1.44024	0.149801	1.44024	0.149801	15	14	0.158309		262	173	68	1.61481	0.106352	1.61481	0.106352	15	14	0.11207		234	201	96	0.392792
2167.99	4612.57	234	201	96	0.392792	0.694473	0.392792	0.694473	15	14	0.71483		244	191	86	0.829228	0.406976	0.829228	0.406976	15	14	0.425262		258	177	72	1.44024	0.149801	1.44024	0.149801	15	14	0.158309		262	173	68	1.61481	0.106352	1.61481	0.106352	15	14	0.11207		234	201	96	0.392792
2169.92	4608.47	234	201	96	0.392792	0.694473	0.392792	0.694473	15	14	0.71483		244	191	86	0.829228	0.406976	0.829228	0.406976	15	14	0.425262		259	176	71	1.48388	0.137841	1.48388	0.137841	15	14	0.145619		263	172	67	1.65846	0.0972264	1.65846	0.0972264	15	14	0.102309		234	201	96	0.392792
2171.85	4604.38	234	201	96	0.392792	0.694473	0.392792	0.694473	15	14	0.71483		245	190	85	0.872872	0.382734	0.872872	0.382734	15	14	0.400494		259	176	71	1.48388	0.137841	1.48388	0.137841	15	14	0.145619		263	172	67	1.65846	0.0972264	1.65846	0.0972264	15	14	0.102309		234	201	96	0.392792
2173.78	4600.29	234	201	96	0.392792	0.694473	0.392792	0.694473	15	14	0.71483		246	189	84	0.916515	0.359397	0.916515	0.359397	15	14	0.376588		259	176	71	1.48388	0.137841	1.48388	0.137841	15	14	0.145619		263	172	67	1.65846	0.0972264	1.65846	0.0972264	15	14	0.102309		234	201	96	0.392792
2175.7	4596.21	234	201	96	0.392792	0.694473	0.392792	0.694473	15	14	0.71483		244	191	86	0.829228	0.406976	0.829228	0.406976	15	14	0.425262		259	176	71	1.48388	0.137841	1.48388	0.137841	15	14	0.145619		263	172	67	1.65846	0.0972264	1.65846	0.0972264	15	14	0.102309		234	201	96	0.392792
2177.63	4592.14	235	200	95	0.436436	0.662521	0.436436	0.662521	15	14	0.682954		244	191	86	0.829228	0.406976	0.829228	0.406976	15	14	0.425262		259	176	71	1.48388	0.137841	1.48388	0.137841	15	14	0.145619		263	172	67	1.65846	0.0972264	1.65846	0.0972264	15	14	0.102309		235	200	95	0.436436
2179.56	4588.08	235	200	95	0.436436	0.662521	0.436436	0.662521	15	14	0.682954		245	190	85	0.872872	0.382734	0.872872	0.382734	15	14	0.400494		259	176	71	1.48388	0.137841	1.48388	0.137841	15	14	0.145619		264	171	66	1.7021	0.0887377	1.7021	0.0887377	15	14	0.0932157		235	200	95	0.436436
2181.49	4584.02	234	201	96	0.392792	0.694473	0.392792	0.694473	15	14	0.71483		244	191	86	0.829228	0.406976	0.829228	0.406976	15	14	0.425262		259	176	71	1.48388	0.137841	1.48388	0.137841	15	14	0.145619		264	171	66	1.7021	0.0887377	1.7021	0.0887377	15	14	0.0932157		235	200	95	0.436436
2183.42	4579.97	236	199	94	0.480079	0.631171	0.480079	0.631171	15	14	0.651619		244	191	86	0.829228	0.406976	0.829228	0.406976	15	14	0.425262		259	176	71	1.48388	0.137841	1.48388	0.137841	15	14	0.145619		264	171	66	1.7021	0.0887377	1.7021	0.0887377	15	14	0.0932157		235	200	95	0.436436
2185.35	4575.93	236	199	94	0.480079	0.631171	0.480079	0.631171	15	14	0.651619		244	191	86	0.829228	0.406976	0.829228	0.406976	15	14	0.425262		259	176	71	1.48388	0.137841	1.48388	0.137841	15	14	0.145619		264	171	66	1.7021	0.0887377	1.7021	0.0887377	15	14	0.0932157		234	201	96	0.392792
2187.28	4571.89	236	199	94	0.480079	0.631171	0.480079	0.631171	15	14	0.651619		245	190	85	0.872872	0.382734	0.872872	0.382734	15	14	0.400494		259	176	71	1.48388	0.137841	1.48388	0.137841	15	14	0.145619		264	171	66	1.7021	0.0887377	1.7021	0.0887377	15	14	0.0932157		234	201	96	0.392792
2189.21	4567.87	236	199	94	0.480079	0.631171	0.480079	0.631171	15	14	0.651619		246	189	84	0.916515	0.359397	0.916515	0.359397	15	14	0.376588		260	175	70	1.52753	0.126631	1.52753	0.126631	15	14	0.1337		264	171	66	1.7021	0.0887377	1.7021	0.0887377	15	14	0.0932157		235	200	95	0.436436
2191.13	4563.84	235	200	95	0.436436	0.662521	0.436436	0.662521	15	14	0.682954		246	189	84	0.916515	0.359397	0.916515	0.359397	15	14	0.376588		259	176	71	1.48388	0.137841	1.48388	0.137841	15	14	0.145619		264	171	66	1.7021	0.0887377	1.7021	0.0887377	15	14	0.0932157		234	201	96	0.392792
2193.06	4559.83	235	200	95	0.436436	0.662521	0.436436	0.662521	15	14	0.682954		246	189	84	0.916515	0.359397	0.916515	0.359397	15	14	0.376588		260	175	70	1.52753	0.126631	1.52753	0.126631	15	14	0.1337		264	171	66	1.7021	0.0887377	1.7021	0.0887377	15	14	0.0932157		234	201	96	0.392792
2194.99	4555.82	235	200	95	0.436436	0.662521	0.436436	0.662521	15	14	0.682954		245	190	85	0.872872	0.382734	0.872872	0.382734	15	14	0.400494		259	176	71	1.48388	0.137841	1.48388	0.137841	15	14	0.145619		264	171	66	1.7021	0.0887377	1.7021	0.0887377	15	14	0.0932157		233	202	97	0.349149
2196.92	4551.82	235	200	95	0.436436	0.662521	0.436436	0.662521	15	14	0.682954		245	190	85	0.872872	0.382734	0.872872	0.382734	15	14	0.400494		259	176	71	1.48388	0.137841	1.48388	0.137841	15	14	0.145619		264	171	66	1.7021	0.0887377	1.7021	0.0887377	15	14	0.0932157		234	201	96	0.392792
2198.85	4547.83	235	200	95	0.436436	0.662521	0.436436	0.662521	15	14	0.682954		246	189	84	0.916515	0.359397	0.916515	0.359397	15	14	0.376588		260	175	70	1.52753	0.126631	1.52753	0.126631	15	14	0.1337		264	171	66	1.7021	0.0887377	1.7021	0.0887377	15	14	0.0932157		232	203	98	0.305505
2200.78	4543.85	235	200	95	0.436436	0.662521	0.436436	0.662521	15	14	0.682954		246	189	84	0.916515	0.359397	0.916515	0.359397	15	14	0.376588		260	175	70	1.52753	0.126631	1.52753	0.126631	15	14	0.1337		264	171	66	1.7021	0.0887377	1.7021	0.0887377	15	14	0.0932157		233	202	97	0.349149
2202.71	4539.87	235	200	95	0.436436	0.662521	0.436436	0.662521	15	14	0.682954		246	189	84	0.916515	0.359397	0.916515	0.359397	15	14	0.376588		259	176	71	1.48388	0.137841	1.48388	0.137841	15	14	0.145619		264	171	66	1.7021	0.0887377	1.7021	0.0887377	15	14	0.0932157		233	202	97	0.349149
2204.64	4535.89	236	199	94	0.480079	0.631171	0.480079	0.631171	15	14	0.651619		246	189	84	0.916515	0.359397	0.916515	0.359397	15	14	0.376588		259	176	71	1.48388	0.137841	1.48388	0.137841	15	14	0.145619		264	171	66	1.7021	0.0887377	1.7021	0.0887377	15	14	0.0932157		234	201	96	0.392792
2206.57	4531.93	236	199	94	0.480079	0.631171	0.480079	0.631171	15	14	0.651619		245	190	85	0.872872	0.382734	0.872872	0.382734	15	14	0.400494		259	176	71	1.48388	0.137841	1.48388	0.137841	15	14	0.145619		264	171	66	1.7021	0.0887377	1.7021	0.0887377	15	14	0.0932157		233	202	97	0.349149
2208.49	4527.97	237	198	93	0.523723	0.600472	0.523723	0.600472	15	14	0.620867		247	188	83	0.960159	0.336976	0.960159	0.336976	15	14	0.353554		261	174	69	1.57117	0.116144	1.57117	0.116144	15	14	0.122524		264	171	66	1.7021	0.0887377	1.7021	0.0887377	15	14	0.0932157		233	202	97	0.349149
2210.42	4524.02	236	199	94	0.480079	0.631171	0.480079	0.631171	15	14	0.651619		247	188	83	0.960159	0.336976	0.960159	0.336976	15	14	0.353554		261	174	69	1.57117	0.116144	1.57117	0.116144	15	14	0.122524		264	171	66	1.7021	0.0887377	1.7021	0.0887377	15	14	0.0932157		234	201	96	0.392792
2212.35	4520.08	235	200	95	0.436436	0.662521	0.436436	0.662521	15	14	0.682954		247	188	83	0.960159	0.336976	0.960159	0.336976	15	14	0.353554		260	175	70	1.52753	0.126631	1.52753	0.126631	15	14	0.1337		264	171	66	1.7021	0.0887377	1.7021	0.0887377	15	14	0.0932157		233	202	97	0.349149
2214.28	4516.14	236	199	94	0.480079	0.631171	0.480079	0.631171	15	14	0.651619		247	188	83	0.960159	0.336976	0.960159	0.336976	15	14	0.353554		261	174	69	1.57117	0.116144	1.57117	0.116144	15	14	0.122524		264	171	66	1.7021	0.0887377	1.7021	0.0887377	15	14	0.0932157		233	202	97	0.349149
2216.21	4512.21	235	200	95	0.436436	0.662521	0.436436	0.662521	15	14	0.682954		247	188	83	0.960159	0.336976	0.960159	0.336976	15	14	0.353554		261	174	69	1.57117	0.116144	1.57117	0.116144	15	14	0.122524		263	172	67	1.65846	0.0972264	1.65846	0.0972264	15	14	0.102309		234	201	96	0.392792
2218.14	4508.28	235	200	95	0.436436	0.662521	0.436436	0.662521	15	14	0.682954		247	188	83	0.960159	0.336976	0.960159	0.336976	15	14	0.353554		262	173	68	1.61481	0.106352	1.61481	0.106352	15	14	0.11207		264	171	66	1.7021	0.0887377	1.7021	0.0887377	15	14	0.0932157		234	201	96	0.392792
2220.07	4504.37	235	200	95	0.436436	0.662521	0.436436	0.662521	15	14	0.682954		247	188	83	0.960159	0.336976	0.960159	0.336976	15	14	0.353554		261	174	69	1.57117	0.116144	1.57117	0.116144	15	14	0.122524		264	171	66	1.7021	0.0887377	1.7021	0.0887377	15	14	0.0932157		234	201	96	0.392792
2222	4500.46	236	199	94	0.480079	0.631171	0.480079	0.631171	15	14	0.651619		248	187	82	1.0038	0.315475	1.0038	0.315475	15	14	0.331405		261	174	69	1.57117	0.116144	1.57117	0.116144	15	14	0.122524		265	170	65	1.74574	0.0808565	1.74574	0.0808565	15	14	0.0847612		233	202	97	0.349149
2223.92	4496.55	236	199	94	0.480079	0.631171	0.480079	0.631171	15	14	0.651619		248	187	82	1.0038	0.315475	1.0038	0.315475	15	14	0.331405		263	172	67	1.65846	0.0972264	1.65846	0.0972264	15	14	0.102309		265	170	65	1.74574	0.0808565	1.74574	0.0808565	15	14	0.0847612		234	201	96	0.392792
2225.85	4492.66	237	198	93	0.523723	0.600472	0.523723	0.600472	15	14	0.620867		248	187	82	1.0038	0.315475	1.0038	0.315475	15	14	0.331405		263	172	67	1.65846	0.0972264	1.65846	0.0972264	15	14	0.102309		265	170	65	1.74574	0.0808565	1.74574	0.0808565	15	14	0.0847612		235	200	95	0.436436
2227.78	4488.77	236	199	94	0.480079	0.631171	0.480079	0.631171	15	14	0.651619		248	187	82	1.0038	0.315475	1.0038	0.315475	15	14	0.331405		263	172	67	1.65846	0.0972264	1.65846	0.0972264	15	14	0.102309		265	170	65	1.74574	0.0808565	1.74574	0.0808565	15	14	0.0847612		234	201	96	0.392792
2229.71	4484.89	236	199	94	0.480079	0.631171	0.480079	0.631171	15	14	0.651619		248	187	82	1.0038	0.315475	1.0038	0.315475	15	14	0.331405		262	173	68	1.61481	0.106352	1.61481	0.106352	15	14	0.11207		265	170	65	1.74574	0.0808565	1.74574	0.0808565	15	14	0.0847612		232	203	98	0.305505
2231.64	4481.01	236	199	94	0.480079	0.631171	0.480079	0.631171	15	14	0.651619		248	187	82	1.0038	0.315475	1.0038	0.315475	15	14	0.331405		263	172	67	1.65846	0.0972264	1.65846	0.0972264	15	14	0.102309		265	170	65	1.74574	0.0808565	1.74574	0.0808565	15	14	0.0847612		233	202	97	0.349149
2233.57	4477.14	236	199	94	0.480079	0.631171	0.480079	0.631171	15	14	0.651619		248	187	82	1.0038	0.315475	1.0038	0.315475	15	14	0.331405		261	174	69	1.57117	0.116144	1.57117	0.116144	15	14	0.122524		264	171	66	1.7021	0.0887377	1.7021	0.0887377	15	14	0.0932157		234	201	96	0.392792
2235.5	4473.28	236	199	94	0.480079	0.631171	0.480079	0.631171	15	14	0.651619		248	187	82	1.0038	0.315475	1.0038	0.315475	15	14	0.331405		262	173	68	1.61481	0.106352	1.61481	0.106352	15	14	0.11207		264	171	66	1.7021	0.0887377	1.7021	0.0887377	15	14	0.0932157		234	201	96	0.392792
2237.43	4469.42	236	199	94	0.480079	0.631171	0.480079	0.631171	15	14	0.651619		247	188	83	0.960159	0.336976	0.960159	0.336976	15	14	0.353554		263	172	67	1.65846	0.0972264	1.65846	0.0972264	15	14	0.102309		264	171	66	1.7021	0.0887377	1.7021	0.0887377	15	14	0.0932157		235	200	95	0.436436
2239.36	4465.57	236	199	94	0.480079	0.631171	0.480079	0.631171	15	14	0.651619		249	186	81	1.04745	0.294895	1.04745	0.294895	15	14	0.310143		262	173	68	1.61481	0.106352	1.61481	0.106352	15	14	0.11207		263	172	67	1.65846	0.0972264	1.65846	0.0972264	15	14	0.102309		234	201	96	0.392792
2241.28	4461.73	236	199	94	0.480079	0.631171	0.480079	0.631171	15	14	0.651619		249	186	81	1.04745	0.294895	1.04745	0.294895	15	14	0.310143		261	174	69	1.57117	0.116144	1.57117	0.116144	15	14	0.122524		263	172	67	1.65846	0.0972264	1.65846	0.0972264	15	14	0.102309		234	201	96	0.392792
2243.21	4457.89	236	199	94	0.480079	0.631171	0.480079	0.631171	15	14	0.651619		249	186	81	1.04745	0.294895	1.04745	0.294895	15	14	0.310143		258	177	72	1.44024	0.149801	1.44024	0.149801	15	14	0.158309		263	172	67	1.65846	0.0972264	1.65846	0.0972264	15	14	0.102309		234	201	96	0.392792
2245.14	4454.06	236	199	94	0.480079	0.631171	0.480079	0.631171	15	14	0.651619		248	187	82	1.0038	0.315475	1.0038	0.315475	15	14	0.331405		257	178	73	1.39659	0.162537	1.39659	0.162537	15	14	0.171789		263	172	67	1.65846	0.0972264	1.65846	0.0972264	15	14	0.102309		234	201	96	0.392792
2247.07	4450.24	237	198	93	0.523723	0.600472	0.523723	0.600472	15	14	0.620867		248	187	82	1.0038	0.315475	1.0038	0.315475	15	14	0.331405		257	178	73	1.39659	0.162537	1.39659	0.162537	15	14	0.171789		262	173	68	1.61481	0.106352	1.61481	0.106352	15	14	0.11207		233	202	97	0.349149
2249	4446.42	238	197	92	0.567367	0.570466	0.567367	0.570466	15	14	0.590745		248	187	82	1.0038	0.315475	1.0038	0.315475	15	14	0.331405		256	179	74	1.35295	0.176072	1.35295	0.176072	15	14	0.186083		262	173	68	1.61481	0.106352	1.61481	0.106352	15	14	0.11207		233	202	97	0.349149
2250.93	4442.61	237	198	93	0.523723	0.600472	0.523723	0.600472	15	14	0.620867		248	187	82	1.0038	0.315475	1.0038	0.315475	15	14	0.331405		258	177	72	1.44024	0.149801	1.44024	0.149801	15	14	0.158309		262	173	68	1.61481	0.106352	1.61481	0.106352	15	14	0.11207		233	202	97	0.349149
2252.86	4438.81	237	198	93	0.523723	0.600472	0.523723	0.600472	15	14	0.620867		248	187	82	1.0038	0.315475	1.0038	0.315475	15	14	0.331405		259	176	71	1.48388	0.137841	1.48388	0.137841	15	14	0.145619		263	172	67	1.65846	0.0972264	1.65846	0.0972264	15	14	0.102309		235	200	95	0.436436
2254.79	4435.01	236	199	94	0.480079	0.631171	0.480079	0.631171	15	14	0.651619		248	187	82	1.0038	0.315475	1.0038	0.315475	15	14	0.331405		258	177	72	1.44024	0.149801	1.44024	0.149801	15	14	0.158309		263	172	67	1.65846	0.0972264	1.65846	0.0972264	15	14	0.102309		234	201	96	0.392792
2256.71	4431.22	236	199	94	0.480079	0.631171	0.480079	0.631171	15	14	0.651619		248	187	82	1.0038	0.315475	1.0038	0.315475	15	14	0.331405		259	176	71	1.48388	0.137841	1.48388	0.137841	15	14	0.145619		263	172	67	1.65846	0.0972264	1.65846	0.0972264	15	14	0.102309		234	201	96	0.392792
2258.64	4427.44	236	199	94	0.480079	0.631171	0.480079	0.631171	15	14	0.651619		247	188	83	0.960159	0.336976	0.960159	0.336976	15	14	0.353554		259	176	71	1.48388	0.137841	1.48388	0.137841	15	14	0.145619		262	173	68	1.61481	0.106352	1.61481	0.106352	15	14	0.11207		234	201	96	0.392792
2260.57	4423.66	236	199	94	0.480079	0.631171	0.480079	0.631171	15	14	0.651619		247	188	83	0.960159	0.336976	0.960159	0.336976	15	14	0.353554		259	176	71	1.48388	0.137841	1.48388	0.137841	15	14	0.145619		262	173	68	1.61481	0.106352	1.61481	0.106352	15	14	0.11207		235	200	95	0.436436
2262.5	4419.89	236	199	94	0.480079	0.631171	0.480079	0.631171	15	14	0.651619		247	188	83	0.960159	0.336976	0.960159	0.336976	15	14	0.353554		259	176	71	1.48388	0.137841	1.48388	0.137841	15	14	0.145619		262	173	68	1.61481	0.106352	1.61481	0.106352	15	14	0.11207		235	200	95	0.436436
2264.43	4416.12	236	199	94	0.480079	0.631171	0.480079	0.631171	15	14	0.651619		247	188	83	0.960159	0.336976	0.960159	0.336976	15	14	0.353554		259	176	71	1.48388	0.137841	1.48388	0.137841	15	14	0.145619		262	173	68	1.61481	0.106352	1.61481	0.106352	15	14	0.11207		235	200	95	0.436436
2266.36	4412.36	236	199	94	0.480079	0.631171	0.480079	0.631171	15	14	0.651619		246	189	84	0.916515	0.359397	0.916515	0.359397	15	14	0.376588		258	177	72	1.44024	0.149801	1.44024	0.149801	15	14	0.158309		262	173	68	1.61481	0.106352	1.61481	0.106352	15	14	0.11207		235	200	95	0.436436
2268.29	4408.61	235	200	95	0.436436	0.662521	0.436436	0.662521	15	14	0.682954		246	189	84	0.916515	0.359397	0.916515	0.359397	15	14	0.376588		259	176	71	1.48388	0.137841	1.48388	0.137841	15	14	0.145619		262	173	68	1.61481	0.106352	1.61481	0.106352	15	14	0.11207		235	200	95	0.436436
2270.22	4404.87	235	200	95	0.436436	0.662521	0.436436	0.662521	15	14	0.682954		245	190	85	0.872872	0.382734	0.872872	0.382734	15	14	0.400494		259	176	71	1.48388	0.137841	1.48388	0.137841	15	14	0.145619		262	173	68	1.61481	0.106352	1.61481	0.106352	15	14	0.11207		235	200	95	0.436436
2272.15	4401.13	236	199	94	0.480079	0.631171	0.480079	0.631171	15	14	0.651619		244	191	86	0.829228	0.406976	0.829228	0.406976	15	14	0.425262		259	176	71	1.48388	0.137841	1.48388	0.137841	15	14	0.145619		262	173	68	1.61481	0.106352	1.61481	0.106352	15	14	0.11207		235	200	95	0.436436
2274.07	4397.39	236	199	94	0.480079	0.631171	0.480079	0.631171	15	14	0.651619		244	191	86	0.829228	0.406976	0.829228	0.406976	15	14	0.425262		259	176	71	1.48388	0.137841	1.48388	0.137841	15	14	0.145619		262	173	68	1.61481	0.106352	1.61481	0.106352	15	14	0.11207		235	200	95	0.436436
2276	4393.67	235	200	95	0.436436	0.662521	0.436436	0.662521	15	14	0.682954		245	190	85	0.872872	0.382734	0.872872	0.382734	15	14	0.400494		259	176	71	1.48388	0.137841	1.48388	0.137841	15	14	0.145619		262	173	68	1.61481	0.106352	1.61481	0.106352	15	14	0.11207		235	200	95	0.436436
2277.93	4389.95	233	202	97	0.349149	0.726978	0.349149	0.726978	15	14	0.747192		245	190	85	0.872872	0.382734	0.872872	0.382734	15	14	0.400494		258	177	72	1.44024	0.149801	1.44024	0.149801	15	14	0.158309		262	173	68	1.61481	0.106352	1.61481	0.106352	15	14	0.11207		235	200	95	0.436436
2279.86	4386.23	233	202	97	0.349149	0.726978	0.349149	0.726978	15	14	0.747192		244	191	86	0.829228	0.406976	0.829228	0.406976	15	14	0.425262		258	177	72	1.44024	0.149801	1.44024	0.149801	15	14	0.158309		262	173	68	1.61481	0.106352	1.61481	0.106352	15	14	0.11207		235	200	95	0.436436
2281.79	4382.53	232	203	98	0.305505	0.759982	0.305505	0.759982	15	14	0.779995		244	191	86	0.829228	0.406976	0.829228	0.406976	15	14	0.425262		258	177	72	1.44024	0.149801	1.44024	0.149801	15	14	0.158309		261	174	69	1.57117	0.116144	1.57117	0.116144	15	14	0.122524		235	200	95	0.436436
2283.72	4378.82	232	203	98	0.305505	0.759982	0.305505	0.759982	15	14	0.779995		244	191	86	0.829228	0.406976	0.829228	0.406976	15	14	0.425262		258	177	72	1.44024	0.149801	1.44024	0.149801	15	14	0.158309		261	174	69	1.57117	0.116144	1.57117	0.116144	15	14	0.122524		235	200	95	0.436436
2285.65	4375.13	232	203	98	0.305505	0.759982	0.305505	0.759982	15	14	0.779995		244	191	86	0.829228	0.406976	0.829228	0.406976	15	14	0.425262		256	179	74	1.35295	0.176072	1.35295	0.176072	15	14	0.186083		262	173	68	1.61481	0.106352	1.61481	0.106352	15	14	0.11207		235	200	95	0.436436
2287.58	4371.44	233	202	97	0.349149	0.726978	0.349149	0.726978	15	14	0.747192		245	190	85	0.872872	0.382734	0.872872	0.382734	15	14	0.400494		256	179	74	1.35295	0.176072	1.35295	0.176072	15	14	0.186083		262	173	68	1.61481	0.106352	1.61481	0.106352	15	14	0.11207		235	200	95	0.436436
2289.5	4367.76	235	200	95	0.436436	0.662521	0.436436	0.662521	15	14	0.682954		242	193	88	0.741941	0.458124	0.741941	0.458124	15	14	0.477307		256	179	74	1.35295	0.176072	1.35295	0.176072	15	14	0.186083		262	173	68	1.61481	0.106352	1.61481	0.106352	15	14	0.11207		236	199	94	0.480079
2291.43	4364.08	234	201	96	0.392792	0.694473	0.392792	0.694473	15	14	0.71483		243	192	87	0.785584	0.432112	0.785584	0.432112	15	14	0.450872		258	177	72	1.44024	0.149801	1.44024	0.149801	15	14	0.158309		261	174	69	1.57117	0.116144	1.57117	0.116144	15	14	0.122524		236	199	94	0.480079
2293.36	4360.41	234	201	96	0.392792	0.694473	0.392792	0.694473	15	14	0.71483		244	191	86	0.829228	0.406976	0.829228	0.406976	15	14	0.425262		258	177	72	1.44024	0.149801	1.44024	0.149801	15	14	0.158309		260	175	70	1.52753	0.126631	1.52753	0.126631	15	14	0.1337		238	197	92	0.567367
2295.29	4356.75	233	202	97	0.349149	0.726978	0.349149	0.726978	15	14	0.747192		246	189	84	0.916515	0.359397	0.916515	0.359397	15	14	0.376588		257	178	73	1.39659	0.162537	1.39659	0.162537	15	14	0.171789		261	174	69	1.57117	0.116144	1.57117	0.116144	15	14	0.122524		239	196	91	0.61101
2297.22	4353.09	233	202	97	0.349149	0.726978	0.349149	0.726978	15	14	0.747192		242	193	88	0.741941	0.458124	0.741941	0.458124	15	14	0.477307		258	177	72	1.44024	0.149801	1.44024	0.149801	15	14	0.158309		259	176	71	1.48388	0.137841	1.48388	0.137841	15	14	0.145619		240	195	90	0.654654
2299.15	4349.44	233	202	97	0.349149	0.726978	0.349149	0.726978	15	14	0.747192		240	195	90	0.654654	0.512691	0.654654	0.512691	15	14	0.532545		258	177	72	1.44024	0.149801	1.44024	0.149801	15	14	0.158309		259	176	71	1.48388	0.137841	1.48388	0.137841	15	14	0.145619		241	194	89	0.698297
2301.08	4345.79	233	202	97	0.349149	0.726978	0.349149	0.726978	15	14	0.747192		238	197	92	0.567367	0.570466	0.567367	0.570466	15	14	0.590745		259	176	71	1.48388	0.137841	1.48388	0.137841	15	14	0.145619		259	176	71	1.48388	0.137841	1.48388	0.137841	15	14	0.145619		241	194	89	0.698297
2303.01	4342.15	231	204	99	0.261861	0.793428	0.261861	0.793428	15	14	0.813179		239	196	91	0.61101	0.541193	0.61101	0.541193	15	14	0.561291		263	172	67	1.65846	0.0972264	1.65846	0.0972264	15	14	0.102309		263	172	67	1.65846	0.0972264	1.65846	0.0972264	15	14	0.102309		245	190	85	0.872872
2304.94	4338.52	229	206	101	0.174574	0.861414	0.174574	0.861414	15	14	0.880478		243	192	87	0.785584	0.432112	0.785584	0.432112	15	14	0.450872		264	171	66	1.7021	0.0887377	1.7021	0.0887377	15	14	0.0932157		262	173	68	1.61481	0.106352	1.61481	0.106352	15	14	0.11207		246	189	84	0.916515
2306.86	4334.89	228	207	102	0.130931	0.89583	0.130931	0.89583	15	14	0.914475		242	193	88	0.741941	0.458124	0.741941	0.458124	15	14	0.477307		265	170	65	1.74574	0.0808565	1.74574	0.0808565	15	14	0.0847612		264	171	66	1.7021	0.0887377	1.7021	0.0887377	15	14	0.0932157		247	188	83	0.960159
2308.79	4331.27	226	209	104	0.0436436	0.965189	0.0436436	0.965189	15	14	0.982865		237	198	93	0.523723	0.600472	0.523723	0.600472	15	14	0.620867		267	168	63	1.83303	0.066799	1.83303	0.066799	15	14	0.0696586		265	170	65	1.74574	0.0808565	1.74574	0.0808565	15	14	0.0847612		248	187	82	1.0038
2310.72	4327.65	227	208	103	0.0872872	0.930443	0.0872872	0.930443	15	14	0.948623		232	203	98	0.305505	0.759982	0.305505	0.759982	15	14	0.779995		269	166	61	1.92032	0.0548187	1.92032	0.0548187	15	14	0.0567726		264	171	66	1.7021	0.0887377	1.7021	0.0887377	15	14	0.0932157		249	186	81	1.04745
2312.65	4324.04	225	210	105	0	1	0	1	15	14	1.01714		230	205	100	0.218218	0.827259	0.218218	0.827259	15	14	0.846694		269	166	61	1.92032	0.0548187	1.92032	0.0548187	15	14	0.0567726		264	171	66	1.7021	0.0887377	1.7021	0.0887377	15	14	0.0932157		249	186	81	1.04745
2314.58	4320.44	224	211	104	-0.0436436	0.965189	-0.0436436	0.965189	15	14	0.982865		228	207	102	0.130931	0.89583	0.130931	0.89583	15	14	0.914475		267	168	63	1.83303	0.066799	1.83303	0.066799	15	14	0.0696586		263	172	67	1.65846	0.0972264	1.65846	0.0972264	15	14	0.102309		251	184	79	1.13473
2316.51	4316.84	217	218	97	-0.349149	0.726978	-0.349149	0.726978	15	14	0.747192		228	207	102	0.130931	0.89583	0.130931	0.89583	15	14	0.914475		270	165	60	1.96396	0.0495355	1.96396	0.0495355	15	14	0.0510899		263	172	67	1.65846	0.0972264	1.65846	0.0972264	15	14	0.102309		256	179	74	1.35295
2318.44	4313.25	213	222	93	-0.523723	0.600472	-0.523723	0.600472	15	14	0.620867		226	209	104	0.0436436	0.965189	0.0436436	0.965189	15	14	0.982865		267	168	63	1.83303	0.066799	1.83303	0.066799	15	14	0.0696586		265	170	65	1.74574	0.0808565	1.74574	0.0808565	15	14	0.0847612		260	175	70	1.52753
2320.37	4309.67	209	226	89	-0.698297	0.484992	-0.698297	0.484992	15	14	0.504539		226	209	104	0.0436436	0.965189	0.0436436	0.965189	15	14	0.982865		270	165	60	1.96396	0.0495355	1.96396	0.0495355	15	14	0.0510899		261	174	69	1.57117	0.116144	1.57117	0.116144	15	14	0.122524		260	175	70	1.52753
2322.29	4306.09	208	227	88	-0.741941	0.458124	-0.741941	0.458124	15	14	0.477307		222	213	102	-0.130931	0.89583	-0.130931	0.89583	15	14	0.914475		271	164	59	2.0076	0.0446862	2.0076	0.0446862	15	14	0.045875		258	177	72	1.44024	0.149801	1.44024	0.149801	15	14	0.158309		257	178	73	1.39659
2324.22	4302.51	206	229	86	-0.829228	0.406976	-0.829228	0.406976	15	14	0.425262		220	215	100	-0.218218	0.827259	-0.218218	0.827259	15	14	0.846694		267	168	63	1.83303	0.066799	1.83303	0.066799	15	14	0.0696586		258	177	72	1.44024	0.149801	1.44024	0.149801	15	14	0.158309		259	176	71	1.48388
2326.15	4298.95	206	229	86	-0.829228	0.406976	-0.829228	0.406976	15	14	0.425262		220	215	100	-0.218218	0.827259	-0.218218	0.827259	15	14	0.846694		267	168	63	1.83303	0.066799	1.83303	0.066799	15	14	0.0696586		257	178	73	1.39659	0.162537	1.39659	0.162537	15	14	0.171789		259	176	71	1.48388
2328.08	4295.38	205	230	85	-0.872872	0.382734	-0.872872	0.382734	15	14	0.400494		220	215	100	-0.218218	0.827259	-0.218218	0.827259	15	14	0.846694		267	168	63	1.83303	0.066799	1.83303	0.066799	15	14	0.0696586		256	179	74	1.35295	0.176072	1.35295	0.176072	15	14	0.186083		259	176	71	1.48388
2330.01	4291.83	204	231	84	-0.916515	0.359397	-0.916515	0.359397	15	14	0.376588		220	215	100	-0.218218	0.827259	-0.218218	0.827259	15	14	0.846694		267	168	63	1.83303	0.066799	1.83303	0.066799	15	14	0.0696586		255	180	75	1.30931	0.190431	1.30931	0.190431	15	14	0.201205		256	179	74	1.35295
2331.94	4288.28	204	231	84	-0.916515	0.359397	-0.916515	0.359397	15	14	0.376588		220	215	100	-0.218218	0.827259	-0.218218	0.827259	15	14	0.846694		267	168	63	1.83303	0.066799	1.83303	0.066799	15	14	0.0696586		255	180	75	1.30931	0.190431	1.30931	0.190431	15	14	0.201205		257	178	73	1.39659
2333.87	4284.73	204	231	84	-0.916515	0.359397	-0.916515	0.359397	15	14	0.376588		219	216	99	-0.261861	0.793428	-0.261861	0.793428	15	14	0.813179		266	169	64	1.78939	0.0735535	1.78939	0.0735535	15	14	0.076919		256	179	74	1.35295	0.176072	1.35295	0.176072	15	14	0.186083		258	177	72	1.44024
2335.8	4281.2	203	232	83	-0.960159	0.336976	-0.960159	0.336976	15	14	0.353554		218	217	98	-0.305505	0.759982	-0.305505	0.759982	15	14	0.779995		265	170	65	1.74574	0.0808565	1.74574	0.0808565	15	14	0.0847612		257	178	73	1.39659	0.162537	1.39659	0.162537	15	14	0.171789		259	176	71	1.48388
2337.72	4277.66	203	232	83	-0.960159	0.336976	-0.960159	0.336976	15	14	0.353554		217	218	97	-0.349149	0.726978	-0.349149	0.726978	15	14	0.747192		263	172	67	1.65846	0.0972264	1.65846	0.0972264	15	14	0.102309		256	179	74	1.35295	0.176072	1.35295	0.176072	15	14	0.186083		261	174	69	1.57117
2339.65	4274.14	201	234	81	-1.04745	0.294895	-1.04745	0.294895	15	14	0.310143		217	218	97	-0.349149	0.726978	-0.349149	0.726978	15	14	0.747192		263	172	67	1.65846	0.0972264	1.65846	0.0972264	15	14	0.102309		256	179	74	1.35295	0.176072	1.35295	0.176072	15	14	0.186083		260	175	70	1.52753
2341.58	4270.62	200	235	80	-1.09109	0.275234	-1.09109	0.275234	15	14	0.289776		218	217	98	-0.305505	0.759982	-0.305505	0.759982	15	14	0.779995		263	172	67	1.65846	0.0972264	1.65846	0.0972264	15	14	0.102309		256	179	74	1.35295	0.176072	1.35295	0.176072	15	14	0.186083		260	175	70	1.52753
2343.51	4267.1	202	233	82	-1.0038	0.315475	-1.0038	0.315475	15	14	0.331405		217	218	97	-0.349149	0.726978	-0.349149	0.726978	15	14	0.747192		264	171	66	1.7021	0.0887377	1.7021	0.0887377	15	14	0.0932157		255	180	75	1.30931	0.190431	1.30931	0.190431	15	14	0.201205		259	176	71	1.48388
2345.44	4263.59	204	231	84	-0.916515	0.359397	-0.916515	0.359397	15	14	0.376588		219	216	99	-0.261861	0.793428	-0.261861	0.793428	15	14	0.813179		268	167	62	1.87667	0.0605637	1.87667	0.0605637	15	14	0.0629534		256	179	74	1.35295	0.176072	1.35295	0.176072	15	14	0.186083		260	175	70	1.52753
2347.37	4260.09	205	230	85	-0.872872	0.382734	-0.872872	0.382734	15	14	0.400494		219	216	99	-0.261861	0.793428	-0.261861	0.793428	15	14	0.813179		268	167	62	1.87667	0.0605637	1.87667	0.0605637	15	14	0.0629534		258	177	72	1.44024	0.149801	1.44024	0.149801	15	14	0.158309		258	177	72	1.44024
2349.3	4256.59	205	230	85	-0.872872	0.382734	-0.872872	0.382734	15	14	0.400494		220	215	100	-0.218218	0.827259	-0.218218	0.827259	15	14	0.846694		267	168	63	1.83303	0.066799	1.83303	0.066799	15	14	0.0696586		257	178	73	1.39659	0.162537	1.39659	0.162537	15	14	0.171789		258	177	72	1.44024
2351.23	4253.1	204	231	84	-0.916515	0.359397	-0.916515	0.359397	15	14	0.376588		217	218	97	-0.349149	0.726978	-0.349149	0.726978	15	14	0.747192		265	170	65	1.74574	0.0808565	1.74574	0.0808565	15	14	0.0847612		257	178	73	1.39659	0.162537	1.39659	0.162537	15	14	0.171789		261	174	69	1.57117
2353.16	4249.61	205	230	85	-0.872872	0.382734	-0.872872	0.382734	15	14	0.400494		211	224	91	-0.61101	0.541193	-0.61101	0.541193	15	14	0.561291		261	174	69	1.57117	0.116144	1.57117	0.116144	15	14	0.122524		255	180	75	1.30931	0.190431	1.30931	0.190431	15	14	0.201205		259	176	71	1.48388
2355.08	4246.13	204	231	84	-0.916515	0.359397	-0.916515	0.359397	15	14	0.376588		213	222	93	-0.523723	0.600472	-0.523723	0.600472	15	14	0.620867		261	174	69	1.57117	0.116144	1.57117	0.116144	15	14	0.122524		255	180	75	1.30931	0.190431	1.30931	0.190431	15	14	0.201205		257	178	73	1.39659
2357.01	4242.66	204	231	84	-0.916515	0.359397	-0.916515	0.359397	15	14	0.376588		212	223	92	-0.567367	0.570466	-0.567367	0.570466	15	14	0.590745		262	173	68	1.61481	0.106352	1.61481	0.106352	15	14	0.11207		252	183	78	1.17838	0.238647	1.17838	0.238647	15	14	0.251712		257	178	73	1.39659
2358.94	4239.19	203	232	83	-0.960159	0.336976	-0.960159	0.336976	15	14	0.353554		211	224	91	-0.61101	0.541193	-0.61101	0.541193	15	14	0.561291		263	172	67	1.65846	0.0972264	1.65846	0.0972264	15	14	0.102309		252	183	78	1.17838	0.238647	1.17838	0.238647	15	14	0.251712		256	179	74	1.35295
2360.87	4235.73	203	232	83	-0.960159	0.336976	-0.960159	0.336976	15	14	0.353554		212	223	92	-0.567367	0.570466	-0.567367	0.570466	15	14	0.590745		262	173	68	1.61481	0.106352	1.61481	0.106352	15	14	0.11207		252	183	78	1.17838	0.238647	1.17838	0.238647	15	14	0.251712		256	179	74	1.35295
2362.8	4232.27	203	232	83	-0.960159	0.336976	-0.960159	0.336976	15	14	0.353554		212	223	92	-0.567367	0.570466	-0.567367	0.570466	15	14	0.590745		261	174	69	1.57117	0.116144	1.57117	0.116144	15	14	0.122524		254	181	76	1.26566	0.205634	1.26566	0.205634	15	14	0.217176		257	178	73	1.39659
2364.73	4228.82	204	231	84	-0.916515	0.359397	-0.916515	0.359397	15	14	0.376588		213	222	93	-0.523723	0.600472	-0.523723	0.600472	15	14	0.620867		259	176	71	1.48388	0.137841	1.48388	0.137841	15	14	0.145619		256	179	74	1.35295	0.176072	1.35295	0.176072	15	14	0.186083		258	177	72	1.44024
2366.66	4225.37	204	231	84	-0.916515	0.359397	-0.916515	0.359397	15	14	0.376588		215	220	95	-0.436436	0.662521	-0.436436	0.662521	15	14	0.682954		262	173	68	1.61481	0.106352	1.61481	0.106352	15	14	0.11207		256	179	74	1.35295	0.176072	1.35295	0.176072	15	14	0.186083		258	177	72	1.44024
2368.59	4221.93	201	234	81	-1.04745	0.294895	-1.04745	0.294895	15	14	0.310143		214	221	94	-0.480079	0.631171	-0.480079	0.631171	15	14	0.651619		262	173	68	1.61481	0.106352	1.61481	0.106352	15	14	0.11207		256	179	74	1.35295	0.176072	1.35295	0.176072	15	14	0.186083		259	176	71	1.48388
2370.51	4218.49	205	230	85	-0.872872	0.382734	-0.872872	0.382734	15	14	0.400494		219	216	99	-0.261861	0.793428	-0.261861	0.793428	15	14	0.813179		266	169	64	1.78939	0.0735535	1.78939	0.0735535	15	14	0.076919		256	179	74	1.35295	0.176072	1.35295	0.176072	15	14	0.186083		260	175	70	1.52753
2372.44	4215.06	202	233	82	-1.0038	0.315475	-1.0038	0.315475	15	14	0.331405		219	216	99	-0.261861	0.793428	-0.261861	0.793428	15	14	0.813179		268	167	62	1.87667	0.0605637	1.87667	0.0605637	15	14	0.0629534		259	176	71	1.48388	0.137841	1.48388	0.137841	15	14	0.145619		258	177	72	1.44024
2374.37	4211.64	210	225	90	-0.654654	0.512691	-0.654654	0.512691	15	14	0.532545		223	212	103	-0.0872872	0.930443	-0.0872872	0.930443	15	14	0.948623		271	164	59	2.0076	0.0446862	2.0076	0.0446862	15	14	0.045875		262	173	68	1.61481	0.106352	1.61481	0.106352	15	14	0.11207		259	176	71	1.48388
2376.3	4208.22	210	225	90	-0.654654	0.512691	-0.654654	0.512691	15	14	0.532545		226	209	104	0.0436436	0.965189	0.0436436	0.965189	15	14	0.982865		269	166	61	1.92032	0.0548187	1.92032	0.0548187	15	14	0.0567726		263	172	67	1.65846	0.0972264	1.65846	0.0972264	15	14	0.102309		249	186	81	1.04745
2378.23	4204.81	222	213	102	-0.130931	0.89583	-0.130931	0.89583	15	14	0.914475		237	198	93	0.523723	0.600472	0.523723	0.600472	15	14	0.620867		266	169	64	1.78939	0.0735535	1.78939	0.0735535	15	14	0.076919		263	172	67	1.65846	0.0972264	1.65846	0.0972264	15	14	0.102309		249	186	81	1.04745
2380.16	4201.4	226	209	104	0.0436436	0.965189	0.0436436	0.965189	15	14	0.982865		239	196	91	0.61101	0.541193	0.61101	0.541193	15	14	0.561291		262	173	68	1.61481	0.106352	1.61481	0.106352	15	14	0.11207		262	173	68	1.61481	0.106352	1.61481	0.106352	15	14	0.11207		243	192	87	0.785584
2382.09	4198	228	207	102	0.130931	0.89583	0.130931	0.89583	15	14	0.914475		241	194	89	0.698297	0.484992	0.698297	0.484992	15	14	0.504539		262	173	68	1.61481	0.106352	1.61481	0.106352	15	14	0.11207		260	175	70	1.52753	0.126631	1.52753	0.126631	15	14	0.1337		241	194	89	0.698297
2384.02	4194.6	231	204	99	0.261861	0.793428	0.261861	0.793428	15	14	0.813179		243	192	87	0.785584	0.432112	0.785584	0.432112	15	14	0.450872		259	176	71	1.48388	0.137841	1.48388	0.137841	15	14	0.145619		261	174	69	1.57117	0.116144	1.57117	0.116144	15	14	0.122524		237	198	93	0.523723
2385.95	4191.21	232	203	98	0.305505	0.759982	0.305505	0.759982	15	14	0.779995		239	196	91	0.61101	0.541193	0.61101	0.541193	15	14	0.561291		257	178	73	1.39659	0.162537	1.39659	0.162537	15	14	0.171789		258	177	72	1.44024	0.149801	1.44024	0.149801	15	14	0.158309		235	200	95	0.436436
2387.87	4187.83	234	201	96	0.392792	0.694473	0.392792	0.694473	15	14	0.71483		241	194	89	0.698297	0.484992	0.698297	0.484992	15	14	0.504539		256	179	74	1.35295	0.176072	1.35295	0.176072	15	14	0.186083		259	176	71	1.48388	0.137841	1.48388	0.137841	15	14	0.145619		234	201	96	0.392792
2389.8	4184.45	234	201	96	0.392792	0.694473	0.392792	0.694473	15	14	0.71483		242	193	88	0.741941	0.458124	0.741941	0.458124	15	14	0.477307		256	179	74	1.35295	0.176072	1.35295	0.176072	15	14	0.186083		256	179	74	1.35295	0.176072	1.35295	0.176072	15	14	0.186083		235	200	95	0.436436
2391.73	4181.07	233	202	97	0.349149	0.726978	0.349149	0.726978	15	14	0.747192		242	193	88	0.741941	0.458124	0.741941	0.458124	15	14	0.477307		256	179	74	1.35295	0.176072	1.35295	0.176072	15	14	0.186083		256	179	74	1.35295	0.176072	1.35295	0.176072	15	14	0.186083		234	201	96	0.392792
2393.66	4177.7	233	202	97	0.349149	0.726978	0.349149	0.726978	15	14	0.747192		243	192	87	0.785584	0.432112	0.785584	0.432112	15	14	0.450872		256	179	74	1.35295	0.176072	1.35295	0.176072	15	14	0.186083		256	179	74	1.35295	0.176072	1.35295	0.176072	15	14	0.186083		234	201	96	0.392792
2395.59	4174.34	233	202	97	0.349149	0.726978	0.349149	0.726978	15	14	0.747192		244	191	86	0.829228	0.406976	0.829228	0.406976	15	14	0.425262		256	179	74	1.35295	0.176072	1.35295	0.176072	15	14	0.186083		256	179	74	1.35295	0.176072	1.35295	0.176072	15	14	0.186083		235	200	95	0.436436
2397.52	4170.98	233	202	97	0.349149	0.726978	0.349149	0.726978	15	14	0.747192		243	192	87	0.785584	0.432112	0.785584	0.432112	15	14	0.450872		256	179	74	1.35295	0.176072	1.35295	0.176072	15	14	0.186083		256	179	74	1.35295	0.176072	1.35295	0.176072	15	14	0.186083		235	200	95	0.436436
2399.45	4167.63	234	201	96	0.392792	0.694473	0.392792	0.694473	15	14	0.71483		243	192	87	0.785584	0.432112	0.785584	0.432112	15	14	0.450872		256	179	74	1.35295	0.176072	1.35295	0.176072	15	14	0.186083		256	179	74	1.35295	0.176072	1.35295	0.176072	15	14	0.186083		235	200	95	0.436436
2401.38	4164.28	234	201	96	0.392792	0.694473	0.392792	0.694473	15	14	0.71483		242	193	88	0.741941	0.458124	0.741941	0.458124	15	14	0.477307		256	179	74	1.35295	0.176072	1.35295	0.176072	15	14	0.186083		256	179	74	1.35295	0.176072	1.35295	0.176072	15	14	0.186083		234	201	96	0.392792
2403.3	4160.94	234	201	96	0.392792	0.694473	0.392792	0.694473	15	14	0.71483		242	193	88	0.741941	0.458124	0.741941	0.458124	15	14	0.477307		256	179	74	1.35295	0.176072	1.35295	0.176072	15	14	0.186083		255	180	75	1.30931	0.190431	1.30931	0.190431	15	14	0.201205		236	199	94	0.480079
2405.23	4157.6	234	201	96	0.392792	0.694473	0.392792	0.694473	15	14	0.71483		241	194	89	0.698297	0.484992	0.698297	0.484992	15	14	0.504539		256	179	74	1.35295	0.176072	1.35295	0.176072	15	14	0.186083		255	180	75	1.30931	0.190431	1.30931	0.190431	15	14	0.201205		236	199	94	0.480079
2407.16	4154.27	234	201	96	0.392792	0.694473	0.392792	0.694473	15	14	0.71483		242	193	88	0.741941	0.458124	0.741941	0.458124	15	14	0.477307		256	179	74	1.35295	0.176072	1.35295	0.176072	15	14	0.186083		255	180	75	1.30931	0.190431	1.30931	0.190431	15	14	0.201205		236	199	94	0.480079
2409.09	4150.94	234	201	96	0.392792	0.694473	0.392792	0.694473	15	14	0.71483		241	194	89	0.698297	0.484992	0.698297	0.484992	15	14	0.504539		256	179	74	1.35295	0.176072	1.35295	0.176072	15	14	0.186083		255	180	75	1.30931	0.190431	1.30931	0.190431	15	14	0.201205		236	199	94	0.480079
2411.02	4147.62	234	201	96	0.392792	0.694473	0.392792	0.694473	15	14	0.71483		241	194	89	0.698297	0.484992	0.698297	0.484992	15	14	0.504539		256	179	74	1.35295	0.176072	1.35295	0.176072	15	14	0.186083		255	180	75	1.30931	0.190431	1.30931	0.190431	15	14	0.201205		235	200	95	0.436436
2412.95	4144.31	234	201	96	0.392792	0.694473	0.392792	0.694473	15	14	0.71483		241	194	89	0.698297	0.484992	0.698297	0.484992	15	14	0.504539		256	179	74	1.35295	0.176072	1.35295	0.176072	15	14	0.186083		255	180	75	1.30931	0.190431	1.30931	0.190431	15	14	0.201205		236	199	94	0.480079
2414.88	4141	234	201	96	0.392792	0.694473	0.392792	0.694473	15	14	0.71483		242	193	88	0.741941	0.458124	0.741941	0.458124	15	14	0.477307		256	179	74	1.35295	0.176072	1.35295	0.176072	15	14	0.186083		255	180	75	1.30931	0.190431	1.30931	0.190431	15	14	0.201205		236	199	94	0.480079
2416.81	4137.69	234	201	96	0.392792	0.694473	0.392792	0.694473	15	14	0.71483		242	193	88	0.741941	0.458124	0.741941	0.458124	15	14	0.477307		256	179	74	1.35295	0.176072	1.35295	0.176072	15	14	0.186083		254	181	76	1.26566	0.205634	1.26566	0.205634	15	14	0.217176		237	198	93	0.523723
2418.74	4134.39	233	202	97	0.349149	0.726978	0.349149	0.726978	15	14	0.747192		241	194	89	0.698297	0.484992	0.698297	0.484992	15	14	0.504539		256	179	74	1.35295	0.176072	1.35295	0.176072	15	14	0.186083		254	181	76	1.26566	0.205634	1.26566	0.205634	15	14	0.217176		237	198	93	0.523723
2420.66	4131.1	233	202	97	0.349149	0.726978	0.349149	0.726978	15	14	0.747192		241	194	89	0.698297	0.484992	0.698297	0.484992	15	14	0.504539		256	179	74	1.35295	0.176072	1.35295	0.176072	15	14	0.186083		254	181	76	1.26566	0.205634	1.26566	0.205634	15	14	0.217176		237	198	93	0.523723
2422.59	4127.81	233	202	97	0.349149	0.726978	0.349149	0.726978	15	14	0.747192		242	193	88	0.741941	0.458124	0.741941	0.458124	15	14	0.477307		256	179	74	1.35295	0.176072	1.35295	0.176072	15	14	0.186083		254	181	76	1.26566	0.205634	1.26566	0.205634	15	14	0.217176		237	198	93	0.523723
2424.52	4124.52	234	201	96	0.392792	0.694473	0.392792	0.694473	15	14	0.71483		242	193	88	0.741941	0.458124	0.741941	0.458124	15	14	0.477307		256	179	74	1.35295	0.176072	1.35295	0.176072	15	14	0.186083		253	182	77	1.22202	0.221701	1.22202	0.221701	15	14	0.234007		237	198	93	0.523723
2426.45	4121.25	233	202	97	0.349149	0.726978	0.349149	0.726978	15	14	0.747192		240	195	90	0.654654	0.512691	0.654654	0.512691	15	14	0.532545		256	179	74	1.35295	0.176072	1.35295	0.176072	15	14	0.186083		253	182	77	1.22202	0.221701	1.22202	0.221701	15	14	0.234007		235	200	95	0.436436
2428.38	4117.97	232	203	98	0.305505	0.759982	0.305505	0.759982	15	14	0.779995		240	195	90	0.654654	0.512691	0.654654	0.512691	15	14	0.532545		256	179	74	1.35295	0.176072	1.35295	0.176072	15	14	0.186083		253	182	77	1.22202	0.221701	1.22202	0.221701	15	14	0.234007		235	200	95	0.436436
2430.31	4114.7	232	203	98	0.305505	0.759982	0.305505	0.759982	15	14	0.779995		239	196	91	0.61101	0.541193	0.61101	0.541193	15	14	0.561291		256	179	74	1.35295	0.176072	1.35295	0.176072	15	14	0.186083		252	183	78	1.17838	0.238647	1.17838	0.238647	15	14	0.251712		236	199	94	0.480079
2432.24	4111.44	234	201	96	0.392792	0.694473	0.392792	0.694473	15	14	0.71483		239	196	91	0.61101	0.541193	0.61101	0.541193	15	14	0.561291		256	179	74	1.35295	0.176072	1.35295	0.176072	15	14	0.186083		253	182	77	1.22202	0.221701	1.22202	0.221701	15	14	0.234007		236	199	94	0.480079
2434.17	4108.18	234	201	96	0.392792	0.694473	0.392792	0.694473	15	14	0.71483		240	195	90	0.654654	0.512691	0.654654	0.512691	15	14	0.532545		256	179	74	1.35295	0.176072	1.35295	0.176072	15	14	0.186083		254	181	76	1.26566	0.205634	1.26566	0.205634	15	14	0.217176		235	200	95	0.436436
2436.09	4104.93	234	201	96	0.392792	0.694473	0.392792	0.694473	15	14	0.71483		240	195	90	0.654654	0.512691	0.654654	0.512691	15	14	0.532545		256	179	74	1.35295	0.176072	1.35295	0.176072	15	14	0.186083		254	181	76	1.26566	0.205634	1.26566	0.205634	15	14	0.217176		235	200	95	0.436436
2438.02	4101.68	234	201	96	0.392792	0.694473	0.392792	0.694473	15	14	0.71483		240	195	90	0.654654	0.512691	0.654654	0.512691	15	14	0.532545		256	179	74	1.35295	0.176072	1.35295	0.176072	15	14	0.186083		254	181	76	1.26566	0.205634	1.26566	0.205634	15	14	0.217176		235	200	95	0.436436
2439.95	4098.44	234	201	96	0.392792	0.694473	0.392792	0.694473	15	14	0.71483		241	194	89	0.698297	0.484992	0.698297	0.484992	15	14	0.504539		255	180	75	1.30931	0.190431	1.30931	0.190431	15	14	0.201205		253	182	77	1.22202	0.221701	1.22202	0.221701	15	14	0.234007		236	199	94	0.480079
2441.88	4095.2	234	201	96	0.392792	0.694473	0.392792	0.694473	15	14	0.71483		242	193	88	0.741941	0.458124	0.741941	0.458124	15	14	0.477307		255	180	75	1.30931	0.190431	1.30931	0.190431	15	14	0.201205		252	183	78	1.17838	0.238647	1.17838	0.238647	15	14	0.251712		236	199	94	0.480079
2443.81	4091.97	234	201	96	0.392792	0.694473	0.392792	0.694473	15	14	0.71483		242	193	88	0.741941	0.458124	0.741941	0.458124	15	14	0.477307		254	181	76	1.26566	0.205634	1.26566	0.205634	15	14	0.217176		253	182	77	1.22202	0.221701	1.22202	0.221701	15	14	0.234007		235	200	95	0.436436
2445.74	4088.74	232	203	98	0.305505	0.759982	0.305505	0.759982	15	14	0.779995		242	193	88	0.741941	0.458124	0.741941	0.458124	15	14	0.477307		254	181	76	1.26566	0.205634	1.26566	0.205634	15	14	0.217176		253	182	77	1.22202	0.221701	1.22202	0.221701	15	14	0.234007		236	199	94	0.480079
2447.67	4085.52	232	203	98	0.305505	0.759982	0.305505	0.759982	15	14	0.779995		242	193	88	0.741941	0.458124	0.741941	0.458124	15	14	0.477307		255	180	75	1.30931	0.190431	1.30931	0.190431	15	14	0.201205		252	183	78	1.17838	0.238647	1.17838	0.238647	15	14	0.251712		236	199	94	0.480079
2449.6	4082.31	232	203	98	0.305505	0.759982	0.305505	0.759982	15	14	0.779995		243	192	87	0.785584	0.432112	0.785584	0.432112	15	14	0.450872		254	181	76	1.26566	0.205634	1.26566	0.205634	15	14	0.217176		252	183	78	1.17838	0.238647	1.17838	0.238647	15	14	0.251712		235	200	95	0.436436
2451.53	4079.09	232	203	98	0.305505	0.759982	0.305505	0.759982	15	14	0.779995		243	192	87	0.785584	0.432112	0.785584	0.432112	15	14	0.450872		253	182	77	1.22202	0.221701	1.22202	0.221701	15	14	0.234007		252	183	78	1.17838	0.238647	1.17838	0.238647	15	14	0.251712		234	201	96	0.392792
2453.45	4075.89	231	204	99	0.261861	0.793428	0.261861	0.793428	15	14	0.813179		243	192	87	0.785584	0.432112	0.785584	0.432112	15	14	0.450872		253	182	77	1.22202	0.221701	1.22202	0.221701	15	14	0.234007		252	183	78	1.17838	0.238647	1.17838	0.238647	15	14	0.251712		235	200	95	0.436436
2455.38	4072.68	231	204	99	0.261861	0.793428	0.261861	0.793428	15	14	0.813179		243	192	87	0.785584	0.432112	0.785584	0.432112	15	14	0.450872		251	184	79	1.13473	0.256488	1.13473	0.256488	15	14	0.270299		252	183	78	1.17838	0.238647	1.17838	0.238647	15	14	0.251712		235	200	95	0.436436
2457.31	4069.49	229	206	101	0.174574	0.861414	0.174574	0.861414	15	14	0.880478		243	192	87	0.785584	0.432112	0.785584	0.432112	15	14	0.450872		251	184	79	1.13473	0.256488	1.13473	0.256488	15	14	0.270299		252	183	78	1.17838	0.238647	1.17838	0.238647	15	14	0.251712		235	200	95	0.436436
2459.24	4066.3	228	207	102	0.130931	0.89583	0.130931	0.89583	15	14	0.914475		243	192	87	0.785584	0.432112	0.785584	0.432112	15	14	0.450872		251	184	79	1.13473	0.256488	1.13473	0.256488	15	14	0.270299		252	183	78	1.17838	0.238647	1.17838	0.238647	15	14	0.251712		235	200	95	0.436436
2461.17	4063.11	228	207	102	0.130931	0.89583	0.130931	0.89583	15	14	0.914475		244	191	86	0.829228	0.406976	0.829228	0.406976	15	14	0.425262		251	184	79	1.13473	0.256488	1.13473	0.256488	15	14	0.270299		251	184	79	1.13473	0.256488	1.13473	0.256488	15	14	0.270299		235	200	95	0.436436
2463.1	4059.93	228	207	102	0.130931	0.89583	0.130931	0.89583	15	14	0.914475		244	191	86	0.829228	0.406976	0.829228	0.406976	15	14	0.425262		251	184	79	1.13473	0.256488	1.13473	0.256488	15	14	0.270299		251	184	79	1.13473	0.256488	1.13473	0.256488	15	14	0.270299		235	200	95	0.436436
2465.03	4056.75	228	207	102	0.130931	0.89583	0.130931	0.89583	15	14	0.914475		244	191	86	0.829228	0.406976	0.829228	0.406976	15	14	0.425262		251	184	79	1.13473	0.256488	1.13473	0.256488	15	14	0.270299		251	184	79	1.13473	0.256488	1.13473	0.256488	15	14	0.270299		235	200	95	0.436436
2466.96	4053.58	230	205	100	0.218218	0.827259	0.218218	0.827259	15	14	0.846694		244	191	86	0.829228	0.406976	0.829228	0.406976	15	14	0.425262		252	183	78	1.17838	0.238647	1.17838	0.238647	15	14	0.251712		251	184	79	1.13473	0.256488	1.13473	0.256488	15	14	0.270299		235	200	95	0.436436
2468.88	4050.41	229	206	101	0.174574	0.861414	0.174574	0.861414	15	14	0.880478		245	190	85	0.872872	0.382734	0.872872	0.382734	15	14	0.400494		252	183	78	1.17838	0.238647	1.17838	0.238647	15	14	0.251712		251	184	79	1.13473	0.256488	1.13473	0.256488	15	14	0.270299		235	200	95	0.436436
2470.81	4047.25	227	208	103	0.0872872	0.930443	0.0872872	0.930443	15	14	0.948623		244	191	86	0.829228	0.406976	0.829228	0.406976	15	14	0.425262		252	183	78	1.17838	0.238647	1.17838	0.238647	15	14	0.251712		251	184	79	1.13473	0.256488	1.13473	0.256488	15	14	0.270299		235	200	95	0.436436
2472.74	4044.09	230	205	100	0.218218	0.827259	0.218218	0.827259	15	14	0.846694		243	192	87	0.785584	0.432112	0.785584	0.432112	15	14	0.450872		252	183	78	1.17838	0.238647	1.17838	0.238647	15	14	0.251712		251	184	79	1.13473	0.256488	1.13473	0.256488	15	14	0.270299		235	200	95	0.436436
2474.67	4040.94	230	205	100	0.218218	0.827259	0.218218	0.827259	15	14	0.846694		242	193	88	0.741941	0.458124	0.741941	0.458124	15	14	0.477307		251	184	79	1.13473	0.256488	1.13473	0.256488	15	14	0.270299		251	184	79	1.13473	0.256488	1.13473	0.256488	15	14	0.270299		236	199	94	0.480079
2476.6	4037.79	230	205	100	0.218218	0.827259	0.218218	0.827259	15	14	0.846694		242	193	88	0.741941	0.458124	0.741941	0.458124	15	14	0.477307		251	184	79	1.13473	0.256488	1.13473	0.256488	15	14	0.270299		251	184	79	1.13473	0.256488	1.13473	0.256488	15	14	0.270299		236	199	94	0.480079
2478.53	4034.65	229	206	101	0.174574	0.861414	0.174574	0.861414	15	14	0.880478		243	192	87	0.785584	0.432112	0.785584	0.432112	15	14	0.450872		251	184	79	1.13473	0.256488	1.13473	0.256488	15	14	0.270299		251	184	79	1.13473	0.256488	1.13473	0.256488	15	14	0.270299		237	198	93	0.523723
2480.46	4031.51	231	204	99	0.261861	0.793428	0.261861	0.793428	15	14	0.813179		243	192	87	0.785584	0.432112	0.785584	0.432112	15	14	0.450872		250	185	80	1.09109	0.275234	1.09109	0.275234	15	14	0.289776		251	184	79	1.13473	0.256488	1.13473	0.256488	15	14	0.270299		236	199	94	0.480079
2482.39	4028.38	231	204	99	0.261861	0.793428	0.261861	0.793428	15	14	0.813179		243	192	87	0.785584	0.432112	0.785584	0.432112	15	14	0.450872		252	183	78	1.17838	0.238647	1.17838	0.238647	15	14	0.251712		251	184	79	1.13473	0.256488	1.13473	0.256488	15	14	0.270299		236	199	94	0.480079
2484.32	4025.25	230	205	100	0.218218	0.827259	0.218218	0.827259	15	14	0.846694		243	192	87	0.785584	0.432112	0.785584	0.432112	15	14	0.450872		252	183	78	1.17838	0.238647	1.17838	0.238647	15	14	0.251712		251	184	79	1.13473	0.256488	1.13473	0.256488	15	14	0.270299		236	199	94	0.480079
2486.24	4022.13	229	206	101	0.174574	0.861414	0.174574	0.861414	15	14	0.880478		243	192	87	0.785584	0.432112	0.785584	0.432112	15	14	0.450872		251	184	79	1.13473	0.256488	1.13473	0.256488	15	14	0.270299		251	184	79	1.13473	0.256488	1.13473	0.256488	15	14	0.270299		235	200	95	0.436436
2488.17	4019.01	229	206	101	0.174574	0.861414	0.174574	0.861414	15	14	0.880478		242	193	88	0.741941	0.458124	0.741941	0.458124	15	14	0.477307		251	184	79	1.13473	0.256488	1.13473	0.256488	15	14	0.270299		251	184	79	1.13473	0.256488	1.13473	0.256488	15	14	0.270299		234	201	96	0.392792
2490.1	4015.9	229	206	101	0.174574	0.861414	0.174574	0.861414	15	14	0.880478		242	193	88	0.741941	0.458124	0.741941	0.458124	15	14	0.477307		251	184	79	1.13473	0.256488	1.13473	0.256488	15	14	0.270299		251	184	79	1.13473	0.256488	1.13473	0.256488	15	14	0.270299		234	201	96	0.392792
2492.03	4012.79	229	206	101	0.174574	0.861414	0.174574	0.861414	15	14	0.880478		242	193	88	0.741941	0.458124	0.741941	0.458124	15	14	0.477307		251	184	79	1.13473	0.256488	1.13473	0.256488	15	14	0.270299		251	184	79	1.13473	0.256488	1.13473	0.256488	15	14	0.270299		234	201	96	0.392792
2493.96	4009.69	228	207	102	0.130931	0.89583	0.130931	0.89583	15	14	0.914475		242	193	88	0.741941	0.458124	0.741941	0.458124	15	14	0.477307		250	185	80	1.09109	0.275234	1.09109	0.275234	15	14	0.289776		251	184	79	1.13473	0.256488	1.13473	0.256488	15	14	0.270299		235	200	95	0.436436
2495.89	4006.59	228	207	102	0.130931	0.89583	0.130931	0.89583	15	14	0.914475		241	194	89	0.698297	0.484992	0.698297	0.484992	15	14	0.504539		250	185	80	1.09109	0.275234	1.09109	0.275234	15	14	0.289776		250	185	80	1.09109	0.275234	1.09109	0.275234	15	14	0.289776		235	200	95	0.436436
2497.82	4003.5	228	207	102	0.130931	0.89583	0.130931	0.89583	15	14	0.914475		242	193	88	0.741941	0.458124	0.741941	0.458124	15	14	0.477307		250	185	80	1.09109	0.275234	1.09109	0.275234	15	14	0.289776		250	185	80	1.09109	0.275234	1.09109	0.275234	15	14	0.289776		235	200	95	0.436436
2499.75	4000.41	228	207	102	0.130931	0.89583	0.130931	0.89583	15	14	0.914475		243	192	87	0.785584	0.432112	0.785584	0.432112	15	14	0.450872		250	185	80	1.09109	0.275234	1.09109	0.275234	15	14	0.289776		250	185	80	1.09109	0.275234	1.09109	0.275234	15	14	0.289776		235	200	95	0.436436
2501.67	3997.32	230	205	100	0.218218	0.827259	0.218218	0.827259	15	14	0.846694		243	192	87	0.785584	0.432112	0.785584	0.432112	15	14	0.450872		250	185	80	1.09109	0.275234	1.09109	0.275234	15	14	0.289776		251	184	79	1.13473	0.256488	1.13473	0.256488	15	14	0.270299		235	200	95	0.436436
2503.6	3994.24	230	205	100	0.218218	0.827259	0.218218	0.827259	15	14	0.846694		242	193	88	0.741941	0.458124	0.741941	0.458124	15	14	0.477307		250	185	80	1.09109	0.275234	1.09109	0.275234	15	14	0.289776		251	184	79	1.13473	0.256488	1.13473	0.256488	15	14	0.270299		235	200	95	0.436436
2505.53	3991.17	229	206	101	0.174574	0.861414	0.174574	0.861414	15	14	0.880478		240	195	90	0.654654	0.512691	0.654654	0.512691	15	14	0.532545		250	185	80	1.09109	0.275234	1.09109	0.275234	15	14	0.289776		250	185	80	1.09109	0.275234	1.09109	0.275234	15	14	0.289776		235	200	95	0.436436
2507.46	3988.1	228	207	102	0.130931	0.89583	0.130931	0.89583	15	14	0.914475		239	196	91	0.61101	0.541193	0.61101	0.541193	15	14	0.561291		250	185	80	1.09109	0.275234	1.09109	0.275234	15	14	0.289776		250	185	80	1.09109	0.275234	1.09109	0.275234	15	14	0.289776		235	200	95	0.436436
2509.39	3985.03	229	206	101	0.174574	0.861414	0.174574	0.861414	15	14	0.880478		239	196	91	0.61101	0.541193	0.61101	0.541193	15	14	0.561291		250	185	80	1.09109	0.275234	1.09109	0.275234	15	14	0.289776		250	185	80	1.09109	0.275234	1.09109	0.275234	15	14	0.289776		233	202	97	0.349149
2511.32	3981.97	231	204	99	0.261861	0.793428	0.261861	0.793428	15	14	0.813179		238	197	92	0.567367	0.570466	0.567367	0.570466	15	14	0.590745		251	184	79	1.13473	0.256488	1.13473	0.256488	15	14	0.270299		250	185	80	1.09109	0.275234	1.09109	0.275234	15	14	0.289776		234	201	96	0.392792
2513.25	3978.92	232	203	98	0.305505	0.759982	0.305505	0.759982	15	14	0.779995		238	197	92	0.567367	0.570466	0.567367	0.570466	15	14	0.590745		251	184	79	1.13473	0.256488	1.13473	0.256488	15	14	0.270299		250	185	80	1.09109	0.275234	1.09109	0.275234	15	14	0.289776		233	202	97	0.349149
2515.18	3975.86	232	203	98	0.305505	0.759982	0.305505	0.759982	15	14	0.779995		238	197	92	0.567367	0.570466	0.567367	0.570466	15	14	0.590745		251	184	79	1.13473	0.256488	1.13473	0.256488	15	14	0.270299		250	185	80	1.09109	0.275234	1.09109	0.275234	15	14	0.289776		233	202	97	0.349149
2517.1	3972.82	233	202	97	0.349149	0.726978	0.349149	0.726978	15	14	0.747192		239	196	91	0.61101	0.541193	0.61101	0.541193	15	14	0.561291		252	183	78	1.17838	0.238647	1.17838	0.238647	15	14	0.251712		250	185	80	1.09109	0.275234	1.09109	0.275234	15	14	0.289776		232	203	98	0.305505
2519.03	3969.78	233	202	97	0.349149	0.726978	0.349149	0.726978	15	14	0.747192		239	196	91	0.61101	0.541193	0.61101	0.541193	15	14	0.561291		252	183	78	1.17838	0.238647	1.17838	0.238647	15	14	0.251712		250	185	80	1.09109	0.275234	1.09109	0.275234	15	14	0.289776		233	202	97	0.349149
2520.96	3966.74	233	202	97	0.349149	0.726978	0.349149	0.726978	15	14	0.747192		238	197	92	0.567367	0.570466	0.567367	0.570466	15	14	0.590745		252	183	78	1.17838	0.238647	1.17838	0.238647	15	14	0.251712		250	185	80	1.09109	0.275234	1.09109	0.275234	15	14	0.289776		233	202	97	0.349149
2522.89	3963.71	232	203	98	0.305505	0.759982	0.305505	0.759982	15	14	0.779995		238	197	92	0.567367	0.570466	0.567367	0.570466	15	14	0.590745		251	184	79	1.13473	0.256488	1.13473	0.256488	15	14	0.270299		250	185	80	1.09109	0.275234	1.09109	0.275234	15	14	0.289776		234	201	96	0.392792
2524.82	3960.68	234	201	96	0.392792	0.694473	0.392792	0.694473	15	14	0.71483		238	197	92	0.567367	0.570466	0.567367	0.570466	15	14	0.590745		251	184	79	1.13473	0.256488	1.13473	0.256488	15	14	0.270299		250	185	80	1.09109	0.275234	1.09109	0.275234	15	14	0.289776		233	202	97	0.349149
2526.75	3957.65	234	201	96	0.392792	0.694473	0.392792	0.694473	15	14	0.71483		238	197	92	0.567367	0.570466	0.567367	0.570466	15	14	0.590745		252	183	78	1.17838	0.238647	1.17838	0.238647	15	14	0.251712		250	185	80	1.09109	0.275234	1.09109	0.275234	15	14	0.289776		233	202	97	0.349149
2528.68	3954.64	234	201	96	0.392792	0.694473	0.392792	0.694473	15	14	0.71483		238	197	92	0.567367	0.570466	0.567367	0.570466	15	14	0.590745		252	183	78	1.17838	0.238647	1.17838	0.238647	15	14	0.251712		250	185	80	1.09109	0.275234	1.09109	0.275234	15	14	0.289776		233	202	97	0.349149
2530.61	3951.62	234	201	96	0.392792	0.694473	0.392792	0.694473	15	14	0.71483		237	198	93	0.523723	0.600472	0.523723	0.600472	15	14	0.620867		252	183	78	1.17838	0.238647	1.17838	0.238647	15	14	0.251712		250	185	80	1.09109	0.275234	1.09109	0.275234	15	14	0.289776		233	202	97	0.349149
2532.54	3948.61	235	200	95	0.436436	0.662521	0.436436	0.662521	15	14	0.682954		237	198	93	0.523723	0.600472	0.523723	0.600472	15	14	0.620867		252	183	78	1.17838	0.238647	1.17838	0.238647	15	14	0.251712		249	186	81	1.04745	0.294895	1.04745	0.294895	15	14	0.310143		233	202	97	0.349149
2534.46	3945.61	235	200	95	0.436436	0.662521	0.436436	0.662521	15	14	0.682954		236	199	94	0.480079	0.631171	0.480079	0.631171	15	14	0.651619		252	183	78	1.17838	0.238647	1.17838	0.238647	15	14	0.251712		249	186	81	1.04745	0.294895	1.04745	0.294895	15	14	0.310143		233	202	97	0.349149
2536.39	3942.61	234	201	96	0.392792	0.694473	0.392792	0.694473	15	14	0.71483		235	200	95	0.436436	0.662521	0.436436	0.662521	15	14	0.682954		252	183	78	1.17838	0.238647	1.17838	0.238647	15	14	0.251712		250	185	80	1.09109	0.275234	1.09109	0.275234	15	14	0.289776		233	202	97	0.349149
2538.32	3939.61	234	201	96	0.392792	0.694473	0.392792	0.694473	15	14	0.71483		236	199	94	0.480079	0.631171	0.480079	0.631171	15	14	0.651619		252	183	78	1.17838	0.238647	1.17838	0.238647	15	14	0.251712		250	185	80	1.09109	0.275234	1.09109	0.275234	15	14	0.289776		233	202	97	0.349149
2540.25	3936.62	233	202	97	0.349149	0.726978	0.349149	0.726978	15	14	0.747192		234	201	96	0.392792	0.694473	0.392792	0.694473	15	14	0.71483		253	182	77	1.22202	0.221701	1.22202	0.221701	15	14	0.234007		249	186	81	1.04745	0.294895	1.04745	0.294895	15	14	0.310143		233	202	97	0.349149
2542.18	3933.63	233	202	97	0.349149	0.726978	0.349149	0.726978	15	14	0.747192		233	202	97	0.349149	0.726978	0.349149	0.726978	15	14	0.747192		253	182	77	1.22202	0.221701	1.22202	0.221701	15	14	0.234007		249	186	81	1.04745	0.294895	1.04745	0.294895	15	14	0.310143		233	202	97	0.349149
2544.11	3930.65	234	201	96	0.392792	0.694473	0.392792	0.694473	15	14	0.71483		232	203	98	0.305505	0.759982	0.305505	0.759982	15	14	0.779995		253	182	77	1.22202	0.221701	1.22202	0.221701	15	14	0.234007		250	185	80	1.09109	0.275234	1.09109	0.275234	15	14	0.289776		233	202	97	0.349149
2546.04	3927.67	233	202	97	0.349149	0.726978	0.349149	0.726978	15	14	0.747192		232	203	98	0.305505	0.759982	0.305505	0.759982	15	14	0.779995		253	182	77	1.22202	0.221701	1.22202	0.221701	15	14	0.234007		250	185	80	1.09109	0.275234	1.09109	0.275234	15	14	0.289776		233	202	97	0.349149
2547.97	3924.7	233	202	97	0.349149	0.726978	0.349149	0.726978	15	14	0.747192		234	201	96	0.392792	0.694473	0.392792	0.694473	15	14	0.71483		253	182	77	1.22202	0.221701	1.22202	0.221701	15	14	0.234007		250	185	80	1.09109	0.275234	1.09109	0.275234	15	14	0.289776		233	202	97	0.349149
2549.89	3921.73	232	203	98	0.305505	0.759982	0.305505	0.759982	15	14	0.779995		234	201	96	0.392792	0.694473	0.392792	0.694473	15	14	0.71483		253	182	77	1.22202	0.221701	1.22202	0.221701	15	14	0.234007		249	186	81	1.04745	0.294895	1.04745	0.294895	15	14	0.310143		233	202	97	0.349149
2551.82	3918.77	232	203	98	0.305505	0.759982	0.305505	0.759982	15	14	0.779995		234	201	96	0.392792	0.694473	0.392792	0.694473	15	14	0.71483		253	182	77	1.22202	0.221701	1.22202	0.221701	15	14	0.234007		249	186	81	1.04745	0.294895	1.04745	0.294895	15	14	0.310143		233	202	97	0.349149
2553.75	3915.81	234	201	96	0.392792	0.694473	0.392792	0.694473	15	14	0.71483		233	202	97	0.349149	0.726978	0.349149	0.726978	15	14	0.747192		253	182	77	1.22202	0.221701	1.22202	0.221701	15	14	0.234007		249	186	81	1.04745	0.294895	1.04745	0.294895	15	14	0.310143		233	202	97	0.349149
2555.68	3912.85	234	201	96	0.392792	0.694473	0.392792	0.694473	15	14	0.71483		233	202	97	0.349149	0.726978	0.349149	0.726978	15	14	0.747192		253	182	77	1.22202	0.221701	1.22202	0.221701	15	14	0.234007		249	186	81	1.04745	0.294895	1.04745	0.294895	15	14	0.310143		231	204	99	0.261861
2557.61	3909.9	234	201	96	0.392792	0.694473	0.392792	0.694473	15	14	0.71483		234	201	96	0.392792	0.694473	0.392792	0.694473	15	14	0.71483		253	182	77	1.22202	0.221701	1.22202	0.221701	15	14	0.234007		249	186	81	1.04745	0.294895	1.04745	0.294895	15	14	0.310143		231	204	99	0.261861
2559.54	3906.95	232	203	98	0.305505	0.759982	0.305505	0.759982	15	14	0.779995		232	203	98	0.305505	0.759982	0.305505	0.759982	15	14	0.779995		253	182	77	1.22202	0.221701	1.22202	0.221701	15	14	0.234007		249	186	81	1.04745	0.294895	1.04745	0.294895	15	14	0.310143		231	204	99	0.261861
2561.47	3904.01	232	203	98	0.305505	0.759982	0.305505	0.759982	15	14	0.779995		233	202	97	0.349149	0.726978	0.349149	0.726978	15	14	0.747192		253	182	77	1.22202	0.221701	1.22202	0.221701	15	14	0.234007		248	187	82	1.0038	0.315475	1.0038	0.315475	15	14	0.331405		231	204	99	0.261861
2563.4	3901.07	232	203	98	0.305505	0.759982	0.305505	0.759982	15	14	0.779995		233	202	97	0.349149	0.726978	0.349149	0.726978	15	14	0.747192		253	182	77	1.22202	0.221701	1.22202	0.221701	15	14	0.234007		248	187	82	1.0038	0.315475	1.0038	0.315475	15	14	0.331405		231	204	99	0.261861
2565.33	3898.14	233	202	97	0.349149	0.726978	0.349149	0.726978	15	14	0.747192		232	203	98	0.305505	0.759982	0.305505	0.759982	15	14	0.779995		253	182	77	1.22202	0.221701	1.22202	0.221701	15	14	0.234007		249	186	81	1.04745	0.294895	1.04745	0.294895	15	14	0.310143		231	204	99	0.261861
2567.25	3895.21	233	202	97	0.349149	0.726978	0.349149	0.726978	15	14	0.747192		232	203	98	0.305505	0.759982	0.305505	0.759982	15	14	0.779995		253	182	77	1.22202	0.221701	1.22202	0.221701	15	14	0.234007		249	186	81	1.04745	0.294895	1.04745	0.294895	15	14	0.310143		231	204	99	0.261861
2569.18	3892.29	233	202	97	0.349149	0.726978	0.349149	0.726978	15	14	0.747192		231	204	99	0.261861	0.793428	0.261861	0.793428	15	14	0.813179		253	182	77	1.22202	0.221701	1.22202	0.221701	15	14	0.234007		248	187	82	1.0038	0.315475	1.0038	0.315475	15	14	0.331405		231	204	99	0.261861
2571.11	3889.37	233	202	97	0.349149	0.726978	0.349149	0.726978	15	14	0.747192		231	204	99	0.261861	0.793428	0.261861	0.793428	15	14	0.813179		253	182	77	1.22202	0.221701	1.22202	0.221701	15	14	0.234007		248	187	82	1.0038	0.315475	1.0038	0.315475	15	14	0.331405		231	204	99	0.261861
2573.04	3886.45	233	202	97	0.349149	0.726978	0.349149	0.726978	15	14	0.747192		231	204	99	0.261861	0.793428	0.261861	0.793428	15	14	0.813179		253	182	77	1.22202	0.221701	1.22202	0.221701	15	14	0.234007		247	188	83	0.960159	0.336976	0.960159	0.336976	15	14	0.353554		231	204	99	0.261861
2574.97	3883.54	233	202	97	0.349149	0.726978	0.349149	0.726978	15	14	0.747192		231	204	99	0.261861	0.793428	0.261861	0.793428	15	14	0.813179		253	182	77	1.22202	0.221701	1.22202	0.221701	15	14	0.234007		246	189	84	0.916515	0.359397	0.916515	0.359397	15	14	0.376588		231	204	99	0.261861
2576.9	3880.63	233	202	97	0.349149	0.726978	0.349149	0.726978	15	14	0.747192		231	204	99	0.261861	0.793428	0.261861	0.793428	15	14	0.813179		253	182	77	1.22202	0.221701	1.22202	0.221701	15	14	0.234007		246	189	84	0.916515	0.359397	0.916515	0.359397	15	14	0.376588		231	204	99	0.261861
2578.83	3877.73	234	201	96	0.392792	0.694473	0.392792	0.694473	15	14	0.71483		231	204	99	0.261861	0.793428	0.261861	0.793428	15	14	0.813179		253	182	77	1.22202	0.221701	1.22202	0.221701	15	14	0.234007		246	189	84	0.916515	0.359397	0.916515	0.359397	15	14	0.376588		231	204	99	0.261861
2580.76	3874.83	234	201	96	0.392792	0.694473	0.392792	0.694473	15	14	0.71483		231	204	99	0.261861	0.793428	0.261861	0.793428	15	14	0.813179		252	183	78	1.17838	0.238647	1.17838	0.238647	15	14	0.251712		246	189	84	0.916515	0.359397	0.916515	0.359397	15	14	0.376588		231	204	99	0.261861
2582.68	3871.94	234	201	96	0.392792	0.694473	0.392792	0.694473	15	14	0.71483		231	204	99	0.261861	0.793428	0.261861	0.793428	15	14	0.813179		252	183	78	1.17838	0.238647	1.17838	0.238647	15	14	0.251712		246	189	84	0.916515	0.359397	0.916515	0.359397	15	14	0.376588		231	204	99	0.261861
2584.61	3869.05	234	201	96	0.392792	0.694473	0.392792	0.694473	15	14	0.71483		231	204	99	0.261861	0.793428	0.261861	0.793428	15	14	0.813179		252	183	78	1.17838	0.238647	1.17838	0.238647	15	14	0.251712		246	189	84	0.916515	0.359397	0.916515	0.359397	15	14	0.376588		231	204	99	0.261861
2586.54	3866.17	234	201	96	0.392792	0.694473	0.392792	0.694473	15	14	0.71483		231	204	99	0.261861	0.793428	0.261861	0.793428	15	14	0.813179		252	183	78	1.17838	0.238647	1.17838	0.238647	15	14	0.251712		246	189	84	0.916515	0.359397	0.916515	0.359397	15	14	0.376588		232	203	98	0.305505
2588.47	3863.28	234	201	96	0.392792	0.694473	0.392792	0.694473	15	14	0.71483		230	205	100	0.218218	0.827259	0.218218	0.827259	15	14	0.846694		252	183	78	1.17838	0.238647	1.17838	0.238647	15	14	0.251712		246	189	84	0.916515	0.359397	0.916515	0.359397	15	14	0.376588		231	204	99	0.261861
2590.4	3860.41	234	201	96	0.392792	0.694473	0.392792	0.694473	15	14	0.71483		230	205	100	0.218218	0.827259	0.218218	0.827259	15	14	0.846694		252	183	78	1.17838	0.238647	1.17838	0.238647	15	14	0.251712		246	189	84	0.916515	0.359397	0.916515	0.359397	15	14	0.376588		232	203	98	0.305505
2592.33	3857.54	234	201	96	0.392792	0.694473	0.392792	0.694473	15	14	0.71483		229	206	101	0.174574	0.861414	0.174574	0.861414	15	14	0.880478		252	183	78	1.17838	0.238647	1.17838	0.238647	15	14	0.251712		246	189	84	0.916515	0.359397	0.916515	0.359397	15	14	0.376588		230	205	100	0.218218
2594.26	3854.67	234	201	96	0.392792	0.694473	0.392792	0.694473	15	14	0.71483		228	207	102	0.130931	0.89583	0.130931	0.89583	15	14	0.914475		252	183	78	1.17838	0.238647	1.17838	0.238647	15	14	0.251712		246	189	84	0.916515	0.359397	0.916515	0.359397	15	14	0.376588		230	205	100	0.218218
2596.19	3851.8	234	201	96	0.392792	0.694473	0.392792	0.694473	15	14	0.71483		228	207	102	0.130931	0.89583	0.130931	0.89583	15	14	0.914475		252	183	78	1.17838	0.238647	1.17838	0.238647	15	14	0.251712		246	189	84	0.916515	0.359397	0.916515	0.359397	15	14	0.376588		230	205	100	0.218218
2598.12	3848.94	235	200	95	0.436436	0.662521	0.436436	0.662521	15	14	0.682954		230	205	100	0.218218	0.827259	0.218218	0.827259	15	14	0.846694		252	183	78	1.17838	0.238647	1.17838	0.238647	15	14	0.251712		247	188	83	0.960159	0.336976	0.960159	0.336976	15	14	0.353554		230	205	100	0.218218
2600.04	3846.09	235	200	95	0.436436	0.662521	0.436436	0.662521	15	14	0.682954		229	206	101	0.174574	0.861414	0.174574	0.861414	15	14	0.880478		251	184	79	1.13473	0.256488	1.13473	0.256488	15	14	0.270299		246	189	84	0.916515	0.359397	0.916515	0.359397	15	14	0.376588		230	205	100	0.218218
2601.97	3843.24	234	201	96	0.392792	0.694473	0.392792	0.694473	15	14	0.71483		229	206	101	0.174574	0.861414	0.174574	0.861414	15	14	0.880478		252	183	78	1.17838	0.238647	1.17838	0.238647	15	14	0.251712		245	190	85	0.872872	0.382734	0.872872	0.382734	15	14	0.400494		231	204	99	0.261861
2603.9	3840.39	234	201	96	0.392792	0.694473	0.392792	0.694473	15	14	0.71483		229	206	101	0.174574	0.861414	0.174574	0.861414	15	14	0.880478		251	184	79	1.13473	0.256488	1.13473	0.256488	15	14	0.270299		245	190	85	0.872872	0.382734	0.872872	0.382734	15	14	0.400494		231	204	99	0.261861
2605.83	3837.55	234	201	96	0.392792	0.694473	0.392792	0.694473	15	14	0.71483		230	205	100	0.218218	0.827259	0.218218	0.827259	15	14	0.846694		251	184	79	1.13473	0.256488	1.13473	0.256488	15	14	0.270299		245	190	85	0.872872	0.382734	0.872872	0.382734	15	14	0.400494		231	204	99	0.261861
2607.76	3834.71	234	201	96	0.392792	0.694473	0.392792	0.694473	15	14	0.71483		230	205	100	0.218218	0.827259	0.218218	0.827259	15	14	0.846694		252	183	78	1.17838	0.238647	1.17838	0.238647	15	14	0.251712		245	190	85	0.872872	0.382734	0.872872	0.382734	15	14	0.400494		231	204	99	0.261861
2609.69	3831.88	234	201	96	0.392792	0.694473	0.392792	0.694473	15	14	0.71483		229	206	101	0.174574	0.861414	0.174574	0.861414	15	14	0.880478		252	183	78	1.17838	0.238647	1.17838	0.238647	15	14	0.251712		245	190	85	0.872872	0.382734	0.872872	0.382734	15	14	0.400494		231	204	99	0.261861
2611.62	3829.05	232	203	98	0.305505	0.759982	0.305505	0.759982	15	14	0.779995		229	206	101	0.174574	0.861414	0.174574	0.861414	15	14	0.880478		252	183	78	1.17838	0.238647	1.17838	0.238647	15	14	0.251712		246	189	84	0.916515	0.359397	0.916515	0.359397	15	14	0.376588		231	204	99	0.261861
2613.55	3826.22	232	203	98	0.305505	0.759982	0.305505	0.759982	15	14	0.779995		228	207	102	0.130931	0.89583	0.130931	0.89583	15	14	0.914475		251	184	79	1.13473	0.256488	1.13473	0.256488	15	14	0.270299		245	190	85	0.872872	0.382734	0.872872	0.382734	15	14	0.400494		230	205	100	0.218218
2615.47	3823.4	232	203	98	0.305505	0.759982	0.305505	0.759982	15	14	0.779995		229	206	101	0.174574	0.861414	0.174574	0.861414	15	14	0.880478		251	184	79	1.13473	0.256488	1.13473	0.256488	15	14	0.270299		245	190	85	0.872872	0.382734	0.872872	0.382734	15	14	0.400494		230	205	100	0.218218
2617.4	3820.58	232	203	98	0.305505	0.759982	0.305505	0.759982	15	14	0.779995		229	206	101	0.174574	0.861414	0.174574	0.861414	15	14	0.880478		251	184	79	1.13473	0.256488	1.13473	0.256488	15	14	0.270299		245	190	85	0.872872	0.382734	0.872872	0.382734	15	14	0.400494		230	205	100	0.218218
2619.33	3817.77	232	203	98	0.305505	0.759982	0.305505	0.759982	15	14	0.779995		228	207	102	0.130931	0.89583	0.130931	0.89583	15	14	0.914475		251	184	79	1.13473	0.256488	1.13473	0.256488	15	14	0.270299		244	191	86	0.829228	0.406976	0.829228	0.406976	15	14	0.425262		229	206	101	0.174574
2621.26	3814.96	232	203	98	0.305505	0.759982	0.305505	0.759982	15	14	0.779995		228	207	102	0.130931	0.89583	0.130931	0.89583	15	14	0.914475		250	185	80	1.09109	0.275234	1.09109	0.275234	15	14	0.289776		243	192	87	0.785584	0.432112	0.785584	0.432112	15	14	0.450872		229	206	101	0.174574
2623.19	3812.15	233	202	97	0.349149	0.726978	0.349149	0.726978	15	14	0.747192		228	207	102	0.130931	0.89583	0.130931	0.89583	15	14	0.914475		250	185	80	1.09109	0.275234	1.09109	0.275234	15	14	0.289776		244	191	86	0.829228	0.406976	0.829228	0.406976	15	14	0.425262		229	206	101	0.174574
2625.12	3809.35	232	203	98	0.305505	0.759982	0.305505	0.759982	15	14	0.779995		229	206	101	0.174574	0.861414	0.174574	0.861414	15	14	0.880478		250	185	80	1.09109	0.275234	1.09109	0.275234	15	14	0.289776		245	190	85	0.872872	0.382734	0.872872	0.382734	15	14	0.400494		229	206	101	0.174574
2627.05	3806.55	232	203	98	0.305505	0.759982	0.305505	0.759982	15	14	0.779995		229	206	101	0.174574	0.861414	0.174574	0.861414	15	14	0.880478		250	185	80	1.09109	0.275234	1.09109	0.275234	15	14	0.289776		243	192	87	0.785584	0.432112	0.785584	0.432112	15	14	0.450872		229	206	101	0.174574
2628.98	3803.76	233	202	97	0.349149	0.726978	0.349149	0.726978	15	14	0.747192		228	207	102	0.130931	0.89583	0.130931	0.89583	15	14	0.914475		251	184	79	1.13473	0.256488	1.13473	0.256488	15	14	0.270299		243	192	87	0.785584	0.432112	0.785584	0.432112	15	14	0.450872		229	206	101	0.174574
2630.91	3800.97	232	203	98	0.305505	0.759982	0.305505	0.759982	15	14	0.779995		228	207	102	0.130931	0.89583	0.130931	0.89583	15	14	0.914475		250	185	80	1.09109	0.275234	1.09109	0.275234	15	14	0.289776		243	192	87	0.785584	0.432112	0.785584	0.432112	15	14	0.450872		229	206	101	0.174574
2632.83	3798.19	232	203	98	0.305505	0.759982	0.305505	0.759982	15	14	0.779995		228	207	102	0.130931	0.89583	0.130931	0.89583	15	14	0.914475		250	185	80	1.09109	0.275234	1.09109	0.275234	15	14	0.289776		243	192	87	0.785584	0.432112	0.785584	0.432112	15	14	0.450872		229	206	101	0.174574
2634.76	3795.41	231	204	99	0.261861	0.793428	0.261861	0.793428	15	14	0.813179		226	209	104	0.0436436	0.965189	0.0436436	0.965189	15	14	0.982865		249	186	81	1.04745	0.294895	1.04745	0.294895	15	14	0.310143		243	192	87	0.785584	0.432112	0.785584	0.432112	15	14	0.450872		229	206	101	0.174574
2636.69	3792.63	231	204	99	0.261861	0.793428	0.261861	0.793428	15	14	0.813179		226	209	104	0.0436436	0.965189	0.0436436	0.965189	15	14	0.982865		249	186	81	1.04745	0.294895	1.04745	0.294895	15	14	0.310143		242	193	88	0.741941	0.458124	0.741941	0.458124	15	14	0.477307		229	206	101	0.174574
2638.62	3789.86	231	204	99	0.261861	0.793428	0.261861	0.793428	15	14	0.813179		226	209	104	0.0436436	0.965189	0.0436436	0.965189	15	14	0.982865		250	185	80	1.09109	0.275234	1.09109	0.275234	15	14	0.289776		243	192	87	0.785584	0.432112	0.785584	0.432112	15	14	0.450872		229	206	101	0.174574
2640.55	3787.09	231	204	99	0.261861	0.793428	0.261861	0.793428	15	14	0.813179		227	208	103	0.0872872	0.930443	0.0872872	0.930443	15	14	0.948623		250	185	80	1.09109	0.275234	1.09109	0.275234	15	14	0.289776		243	192	87	0.785584	0.432112	0.785584	0.432112	15	14	0.450872		229	206	101	0.174574
2642.48	3784.33	232	203	98	0.305505	0.759982	0.305505	0.759982	15	14	0.779995		227	208	103	0.0872872	0.930443	0.0872872	0.930443	15	14	0.948623		250	185	80	1.09109	0.275234	1.09109	0.275234	15	14	0.289776		242	193	88	0.741941	0.458124	0.741941	0.458124	15	14	0.477307		229	206	101	0.174574
2644.41	3781.57	233	202	97	0.349149	0.726978	0.349149	0.726978	15	14	0.747192		227	208	103	0.0872872	0.930443	0.0872872	0.930443	15	14	0.948623		250	185	80	1.09109	0.275234	1.09109	0.275234	15	14	0.289776		242	193	88	0.741941	0.458124	0.741941	0.458124	15	14	0.477307		228	207	102	0.130931
2646.34	3778.81	232	203	98	0.305505	0.759982	0.305505	0.759982	15	14	0.779995		226	209	104	0.0436436	0.965189	0.0436436	0.965189	15	14	0.982865		250	185	80	1.09109	0.275234	1.09109	0.275234	15	14	0.289776		242	193	88	0.741941	0.458124	0.741941	0.458124	15	14	0.477307		228	207	102	0.130931
2648.26	3776.06	231	204	99	0.261861	0.793428	0.261861	0.793428	15	14	0.813179		225	210	105	0	1	0	1	15	14	1.01714		251	184	79	1.13473	0.256488	1.13473	0.256488	15	14	0.270299		242	193	88	0.741941	0.458124	0.741941	0.458124	15	14	0.477307		228	207	102	0.130931
2650.19	3773.31	231	204	99	0.261861	0.793428	0.261861	0.793428	15	14	0.813179		225	210	105	0	1	0	1	15	14	1.01714		250	185	80	1.09109	0.275234	1.09109	0.275234	15	14	0.289776		244	191	86	0.829228	0.406976	0.829228	0.406976	15	14	0.425262		228	207	102	0.130931
2652.12	3770.57	231	204	99	0.261861	0.793428	0.261861	0.793428	15	14	0.813179		225	210	105	0	1	0	1	15	14	1.01714		250	185	80	1.09109	0.275234	1.09109	0.275234	15	14	0.289776		244	191	86	0.829228	0.406976	0.829228	0.406976	15	14	0.425262		229	206	101	0.174574
2654.05	3767.83	231	204	99	0.261861	0.793428	0.261861	0.793428	15	14	0.813179		225	210	105	0	1	0	1	15	14	1.01714		250	185	80	1.09109	0.275234	1.09109	0.275234	15	14	0.289776		243	192	87	0.785584	0.432112	0.785584	0.432112	15	14	0.450872		229	206	101	0.174574
2655.98	3765.09	231	204	99	0.261861	0.793428	0.261861	0.793428	15	14	0.813179		225	210	105	0	1	0	1	15	14	1.01714		250	185	80	1.09109	0.275234	1.09109	0.275234	15	14	0.289776		244	191	86	0.829228	0.406976	0.829228	0.406976	15	14	0.425262		229	206	101	0.174574
2657.91	3762.36	232	203	98	0.305505	0.759982	0.305505	0.759982	15	14	0.779995		224	211	104	-0.0436436	0.965189	-0.0436436	0.965189	15	14	0.982865		250	185	80	1.09109	0.275234	1.09109	0.275234	15	14	0.289776		244	191	86	0.829228	0.406976	0.829228	0.406976	15	14	0.425262		228	207	102	0.130931
2659.84	3759.63	231	204	99	0.261861	0.793428	0.261861	0.793428	15	14	0.813179		224	211	104	-0.0436436	0.965189	-0.0436436	0.965189	15	14	0.982865		250	185	80	1.09109	0.275234	1.09109	0.275234	15	14	0.289776		244	191	86	0.829228	0.406976	0.829228	0.406976	15	14	0.425262		227	208	103	0.0872872
2661.77	3756.9	231	204	99	0.261861	0.793428	0.261861	0.793428	15	14	0.813179		224	211	104	-0.0436436	0.965189	-0.0436436	0.965189	15	14	0.982865		250	185	80	1.09109	0.275234	1.09109	0.275234	15	14	0.289776		243	192	87	0.785584	0.432112	0.785584	0.432112	15	14	0.450872		227	208	103	0.0872872
2663.69	3754.18	232	203	98	0.305505	0.759982	0.305505	0.759982	15	14	0.779995		225	210	105	0	1	0	1	15	14	1.01714		250	185	80	1.09109	0.275234	1.09109	0.275234	15	14	0.289776		245	190	85	0.872872	0.382734	0.872872	0.382734	15	14	0.400494		227	208	103	0.0872872
2665.62	3751.47	231	204	99	0.261861	0.793428	0.261861	0.793428	15	14	0.813179		226	209	104	0.0436436	0.965189	0.0436436	0.965189	15	14	0.982865		250	185	80	1.09109	0.275234	1.09109	0.275234	15	14	0.289776		246	189	84	0.916515	0.359397	0.916515	0.359397	15	14	0.376588		227	208	103	0.0872872
2667.55	3748.75	231	204	99	0.261861	0.793428	0.261861	0.793428	15	14	0.813179		227	208	103	0.0872872	0.930443	0.0872872	0.930443	15	14	0.948623		250	185	80	1.09109	0.275234	1.09109	0.275234	15	14	0.289776		245	190	85	0.872872	0.382734	0.872872	0.382734	15	14	0.400494		228	207	102	0.130931
2669.48	3746.05	230	205	100	0.218218	0.827259	0.218218	0.827259	15	14	0.846694		226	209	104	0.0436436	0.965189	0.0436436	0.965189	15	14	0.982865		250	185	80	1.09109	0.275234	1.09109	0.275234	15	14	0.289776		246	189	84	0.916515	0.359397	0.916515	0.359397	15	14	0.376588		227	208	103	0.0872872
2671.41	3743.34	229	206	101	0.174574	0.861414	0.174574	0.861414	15	14	0.880478		226	209	104	0.0436436	0.965189	0.0436436	0.965189	15	14	0.982865		250	185	80	1.09109	0.275234	1.09109	0.275234	15	14	0.289776		245	190	85	0.872872	0.382734	0.872872	0.382734	15	14	0.400494		227	208	103	0.0872872
2673.34	3740.64	228	207	102	0.130931	0.89583	0.130931	0.89583	15	14	0.914475		226	209	104	0.0436436	0.965189	0.0436436	0.965189	15	14	0.982865		250	185	80	1.09109	0.275234	1.09109	0.275234	15	14	0.289776		245	190	85	0.872872	0.382734	0.872872	0.382734	15	14	0.400494		227	208	103	0.0872872
2675.27	3737.94	229	206	101	0.174574	0.861414	0.174574	0.861414	15	14	0.880478		227	208	103	0.0872872	0.930443	0.0872872	0.930443	15	14	0.948623		249	186	81	1.04745	0.294895	1.04745	0.294895	15	14	0.310143		245	190	85	0.872872	0.382734	0.872872	0.382734	15	14	0.400494		228	207	102	0.130931
2677.2	3735.25	229	206	101	0.174574	0.861414	0.174574	0.861414	15	14	0.880478		227	208	103	0.0872872	0.930443	0.0872872	0.930443	15	14	0.948623		249	186	81	1.04745	0.294895	1.04745	0.294895	15	14	0.310143		245	190	85	0.872872	0.382734	0.872872	0.382734	15	14	0.400494		227	208	103	0.0872872
2679.13	3732.56	228	207	102	0.130931	0.89583	0.130931	0.89583	15	14	0.914475		227	208	103	0.0872872	0.930443	0.0872872	0.930443	15	14	0.948623		249	186	81	1.04745	0.294895	1.04745	0.294895	15	14	0.310143		244	191	86	0.829228	0.406976	0.829228	0.406976	15	14	0.425262		228	207	102	0.130931
2681.05	3729.88	228	207	102	0.130931	0.89583	0.130931	0.89583	15	14	0.914475		227	208	103	0.0872872	0.930443	0.0872872	0.930443	15	14	0.948623		249	186	81	1.04745	0.294895	1.04745	0.294895	15	14	0.310143		245	190	85	0.872872	0.382734	0.872872	0.382734	15	14	0.400494		228	207	102	0.130931
2682.98	3727.19	228	207	102	0.130931	0.89583	0.130931	0.89583	15	14	0.914475		226	209	104	0.0436436	0.965189	0.0436436	0.965189	15	14	0.982865		249	186	81	1.04745	0.294895	1.04745	0.294895	15	14	0.310143		246	189	84	0.916515	0.359397	0.916515	0.359397	15	14	0.376588		228	207	102	0.130931
2684.91	3724.52	228	207	102	0.130931	0.89583	0.130931	0.89583	15	14	0.914475		226	209	104	0.0436436	0.965189	0.0436436	0.965189	15	14	0.982865		249	186	81	1.04745	0.294895	1.04745	0.294895	15	14	0.310143		244	191	86	0.829228	0.406976	0.829228	0.406976	15	14	0.425262		228	207	102	0.130931
2686.84	3721.84	229	206	101	0.174574	0.861414	0.174574	0.861414	15	14	0.880478		226	209	104	0.0436436	0.965189	0.0436436	0.965189	15	14	0.982865		250	185	80	1.09109	0.275234	1.09109	0.275234	15	14	0.289776		243	192	87	0.785584	0.432112	0.785584	0.432112	15	14	0.450872		228	207	102	0.130931
2688.77	3719.17	229	206	101	0.174574	0.861414	0.174574	0.861414	15	14	0.880478		226	209	104	0.0436436	0.965189	0.0436436	0.965189	15	14	0.982865		250	185	80	1.09109	0.275234	1.09109	0.275234	15	14	0.289776		243	192	87	0.785584	0.432112	0.785584	0.432112	15	14	0.450872		229	206	101	0.174574
2690.7	3716.51	229	206	101	0.174574	0.861414	0.174574	0.861414	15	14	0.880478		226	209	104	0.0436436	0.965189	0.0436436	0.965189	15	14	0.982865		250	185	80	1.09109	0.275234	1.09109	0.275234	15	14	0.289776		244	191	86	0.829228	0.406976	0.829228	0.406976	15	14	0.425262		228	207	102	0.130931
2692.63	3713.85	230	205	100	0.218218	0.827259	0.218218	0.827259	15	14	0.846694		225	210	105	0	1	0	1	15	14	1.01714		250	185	80	1.09109	0.275234	1.09109	0.275234	15	14	0.289776		244	191	86	0.829228	0.406976	0.829228	0.406976	15	14	0.425262		228	207	102	0.130931
2694.56	3711.19	230	205	100	0.218218	0.827259	0.218218	0.827259	15	14	0.846694		226	209	104	0.0436436	0.965189	0.0436436	0.965189	15	14	0.982865		250	185	80	1.09109	0.275234	1.09109	0.275234	15	14	0.289776		244	191	86	0.829228	0.406976	0.829228	0.406976	15	14	0.425262		228	207	102	0.130931
2696.48	3708.53	230	205	100	0.218218	0.827259	0.218218	0.827259	15	14	0.846694		226	209	104	0.0436436	0.965189	0.0436436	0.965189	15	14	0.982865		250	185	80	1.09109	0.275234	1.09109	0.275234	15	14	0.289776		245	190	85	0.872872	0.382734	0.872872	0.382734	15	14	0.400494		228	207	102	0.130931
2698.41	3705.88	230	205	100	0.218218	0.827259	0.218218	0.827259	15	14	0.846694		226	209	104	0.0436436	0.965189	0.0436436	0.965189	15	14	0.982865		250	185	80	1.09109	0.275234	1.09109	0.275234	15	14	0.289776		244	191	86	0.829228	0.406976	0.829228	0.406976	15	14	0.425262		228	207	102	0.130931
2700.34	3703.23	230	205	100	0.218218	0.827259	0.218218	0.827259	15	14	0.846694		225	210	105	0	1	0	1	15	14	1.01714		250	185	80	1.09109	0.275234	1.09109	0.275234	15	14	0.289776		244	191	86	0.829228	0.406976	0.829228	0.406976	15	14	0.425262		228	207	102	0.130931
2702.27	3700.59	230	205	100	0.218218	0.827259	0.218218	0.827259	15	14	0.846694		224	211	104	-0.0436436	0.965189	-0.0436436	0.965189	15	14	0.982865		250	185	80	1.09109	0.275234	1.09109	0.275234	15	14	0.289776		244	191	86	0.829228	0.406976	0.829228	0.406976	15	14	0.425262		228	207	102	0.130931
2704.2	3697.95	230	205	100	0.218218	0.827259	0.218218	0.827259	15	14	0.846694		225	210	105	0	1	0	1	15	14	1.01714		250	185	80	1.09109	0.275234	1.09109	0.275234	15	14	0.289776		244	191	86	0.829228	0.406976	0.829228	0.406976	15	14	0.425262		228	207	102	0.130931
2706.13	3695.32	231	204	99	0.261861	0.793428	0.261861	0.793428	15	14	0.813179		225	210	105	0	1	0	1	15	14	1.01714		251	184	79	1.13473	0.256488	1.13473	0.256488	15	14	0.270299		244	191	86	0.829228	0.406976	0.829228	0.406976	15	14	0.425262		228	207	102	0.130931
2708.06	3692.68	231	204	99	0.261861	0.793428	0.261861	0.793428	15	14	0.813179		226	209	104	0.0436436	0.965189	0.0436436	0.965189	15	14	0.982865		251	184	79	1.13473	0.256488	1.13473	0.256488	15	14	0.270299		245	190	85	0.872872	0.382734	0.872872	0.382734	15	14	0.400494		228	207	102	0.130931
2709.99	3690.06	231	204	99	0.261861	0.793428	0.261861	0.793428	15	14	0.813179		225	210	105	0	1	0	1	15	14	1.01714		251	184	79	1.13473	0.256488	1.13473	0.256488	15	14	0.270299		245	190	85	0.872872	0.382734	0.872872	0.382734	15	14	0.400494		228	207	102	0.130931
2711.92	3687.43	231	204	99	0.261861	0.793428	0.261861	0.793428	15	14	0.813179		225	210	105	0	1	0	1	15	14	1.01714		251	184	79	1.13473	0.256488	1.13473	0.256488	15	14	0.270299		245	190	85	0.872872	0.382734	0.872872	0.382734	15	14	0.400494		228	207	102	0.130931
2713.84	3684.81	230	205	100	0.218218	0.827259	0.218218	0.827259	15	14	0.846694		225	210	105	0	1	0	1	15	14	1.01714		251	184	79	1.13473	0.256488	1.13473	0.256488	15	14	0.270299		247	188	83	0.960159	0.336976	0.960159	0.336976	15	14	0.353554		228	207	102	0.130931
2715.77	3682.19	230	205	100	0.218218	0.827259	0.218218	0.827259	15	14	0.846694		225	210	105	0	1	0	1	15	14	1.01714		251	184	79	1.13473	0.256488	1.13473	0.256488	15	14	0.270299		247	188	83	0.960159	0.336976	0.960159	0.336976	15	14	0.353554		228	207	102	0.130931
2717.7	3679.58	230	205	100	0.218218	0.827259	0.218218	0.827259	15	14	0.846694		226	209	104	0.0436436	0.965189	0.0436436	0.965189	15	14	0.982865		251	184	79	1.13473	0.256488	1.13473	0.256488	15	14	0.270299		247	188	83	0.960159	0.336976	0.960159	0.336976	15	14	0.353554		227	208	103	0.0872872
2719.63	3676.97	231	204	99	0.261861	0.793428	0.261861	0.793428	15	14	0.813179		225	210	105	0	1	0	1	15	14	1.01714		252	183	78	1.17838	0.238647	1.17838	0.238647	15	14	0.251712		247	188	83	0.960159	0.336976	0.960159	0.336976	15	14	0.353554		227	208	103	0.0872872
2721.56	3674.36	231	204	99	0.261861	0.793428	0.261861	0.793428	15	14	0.813179		225	210	105	0	1	0	1	15	14	1.01714		252	183	78	1.17838	0.238647	1.17838	0.238647	15	14	0.251712		248	187	82	1.0038	0.315475	1.0038	0.315475	15	14	0.331405		228	207	102	0.130931
2723.49	3671.76	231	204	99	0.261861	0.793428	0.261861	0.793428	15	14	0.813179		225	210	105	0	1	0	1	15	14	1.01714		252	183	78	1.17838	0.238647	1.17838	0.238647	15	14	0.251712		248	187	82	1.0038	0.315475	1.0038	0.315475	15	14	0.331405		227	208	103	0.0872872
2725.42	3669.16	231	204	99	0.261861	0.793428	0.261861	0.793428	15	14	0.813179		225	210	105	0	1	0	1	15	14	1.01714		252	183	78	1.17838	0.238647	1.17838	0.238647	15	14	0.251712		248	187	82	1.0038	0.315475	1.0038	0.315475	15	14	0.331405		227	208	103	0.0872872
2727.35	3666.57	231	204	99	0.261861	0.793428	0.261861	0.793428	15	14	0.813179		226	209	104	0.0436436	0.965189	0.0436436	0.965189	15	14	0.982865		253	182	77	1.22202	0.221701	1.22202	0.221701	15	14	0.234007		247	188	83	0.960159	0.336976	0.960159	0.336976	15	14	0.353554		228	207	102	0.130931
2729.27	3663.98	231	204	99	0.261861	0.793428	0.261861	0.793428	15	14	0.813179		226	209	104	0.0436436	0.965189	0.0436436	0.965189	15	14	0.982865		253	182	77	1.22202	0.221701	1.22202	0.221701	15	14	0.234007		249	186	81	1.04745	0.294895	1.04745	0.294895	15	14	0.310143		228	207	102	0.130931
2731.2	3661.39	230	205	100	0.218218	0.827259	0.218218	0.827259	15	14	0.846694		226	209	104	0.0436436	0.965189	0.0436436	0.965189	15	14	0.982865		253	182	77	1.22202	0.221701	1.22202	0.221701	15	14	0.234007		250	185	80	1.09109	0.275234	1.09109	0.275234	15	14	0.289776		227	208	103	0.0872872
2733.13	3658.81	230	205	100	0.218218	0.827259	0.218218	0.827259	15	14	0.846694		227	208	103	0.0872872	0.930443	0.0872872	0.930443	15	14	0.948623		253	182	77	1.22202	0.221701	1.22202	0.221701	15	14	0.234007		249	186	81	1.04745	0.294895	1.04745	0.294895	15	14	0.310143		229	206	101	0.174574
2735.06	3656.23	230	205	100	0.218218	0.827259	0.218218	0.827259	15	14	0.846694		227	208	103	0.0872872	0.930443	0.0872872	0.930443	15	14	0.948623		253	182	77	1.22202	0.221701	1.22202	0.221701	15	14	0.234007		248	187	82	1.0038	0.315475	1.0038	0.315475	15	14	0.331405		228	207	102	0.130931
2736.99	3653.65	230	205	100	0.218218	0.827259	0.218218	0.827259	15	14	0.846694		226	209	104	0.0436436	0.965189	0.0436436	0.965189	15	14	0.982865		253	182	77	1.22202	0.221701	1.22202	0.221701	15	14	0.234007		249	186	81	1.04745	0.294895	1.04745	0.294895	15	14	0.310143		228	207	102	0.130931
2738.92	3651.08	231	204	99	0.261861	0.793428	0.261861	0.793428	15	14	0.813179		228	207	102	0.130931	0.89583	0.130931	0.89583	15	14	0.914475		253	182	77	1.22202	0.221701	1.22202	0.221701	15	14	0.234007		251	184	79	1.13473	0.256488	1.13473	0.256488	15	14	0.270299		228	207	102	0.130931
2740.85	3648.51	231	204	99	0.261861	0.793428	0.261861	0.793428	15	14	0.813179		228	207	102	0.130931	0.89583	0.130931	0.89583	15	14	0.914475		254	181	76	1.26566	0.205634	1.26566	0.205634	15	14	0.217176		250	185	80	1.09109	0.275234	1.09109	0.275234	15	14	0.289776		227	208	103	0.0872872
2742.78	3645.94	231	204	99	0.261861	0.793428	0.261861	0.793428	15	14	0.813179		228	207	102	0.130931	0.89583	0.130931	0.89583	15	14	0.914475		254	181	76	1.26566	0.205634	1.26566	0.205634	15	14	0.217176		251	184	79	1.13473	0.256488	1.13473	0.256488	15	14	0.270299		227	208	103	0.0872872
2744.71	3643.38	231	204	99	0.261861	0.793428	0.261861	0.793428	15	14	0.813179		228	207	102	0.130931	0.89583	0.130931	0.89583	15	14	0.914475		255	180	75	1.30931	0.190431	1.30931	0.190431	15	14	0.201205		251	184	79	1.13473	0.256488	1.13473	0.256488	15	14	0.270299		227	208	103	0.0872872
2746.63	3640.82	231	204	99	0.261861	0.793428	0.261861	0.793428	15	14	0.813179		228	207	102	0.130931	0.89583	0.130931	0.89583	15	14	0.914475		255	180	75	1.30931	0.190431	1.30931	0.190431	15	14	0.201205		251	184	79	1.13473	0.256488	1.13473	0.256488	15	14	0.270299		227	208	103	0.0872872
2748.56	3638.27	231	204	99	0.261861	0.793428	0.261861	0.793428	15	14	0.813179		228	207	102	0.130931	0.89583	0.130931	0.89583	15	14	0.914475		255	180	75	1.30931	0.190431	1.30931	0.190431	15	14	0.201205		251	184	79	1.13473	0.256488	1.13473	0.256488	15	14	0.270299		227	208	103	0.0872872
2750.49	3635.71	231	204	99	0.261861	0.793428	0.261861	0.793428	15	14	0.813179		228	207	102	0.130931	0.89583	0.130931	0.89583	15	14	0.914475		255	180	75	1.30931	0.190431	1.30931	0.190431	15	14	0.201205		250	185	80	1.09109	0.275234	1.09109	0.275234	15	14	0.289776		227	208	103	0.0872872
2752.42	3633.17	231	204	99	0.261861	0.793428	0.261861	0.793428	15	14	0.813179		228	207	102	0.130931	0.89583	0.130931	0.89583	15	14	0.914475		255	180	75	1.30931	0.190431	1.30931	0.190431	15	14	0.201205		251	184	79	1.13473	0.256488	1.13473	0.256488	15	14	0.270299		227	208	103	0.0872872
2754.35	3630.62	231	204	99	0.261861	0.793428	0.261861	0.793428	15	14	0.813179		228	207	102	0.130931	0.89583	0.130931	0.89583	15	14	0.914475		255	180	75	1.30931	0.190431	1.30931	0.190431	15	14	0.201205		251	184	79	1.13473	0.256488	1.13473	0.256488	15	14	0.270299		227	208	103	0.0872872
2756.28	3628.08	231	204	99	0.261861	0.793428	0.261861	0.793428	15	14	0.813179		228	207	102	0.130931	0.89583	0.130931	0.89583	15	14	0.914475		255	180	75	1.30931	0.190431	1.30931	0.190431	15	14	0.201205		250	185	80	1.09109	0.275234	1.09109	0.275234	15	14	0.289776		227	208	103	0.0872872
2758.21	3625.54	230	205	100	0.218218	0.827259	0.218218	0.827259	15	14	0.846694		228	207	102	0.130931	0.89583	0.130931	0.89583	15	14	0.914475		255	180	75	1.30931	0.190431	1.30931	0.190431	15	14	0.201205		250	185	80	1.09109	0.275234	1.09109	0.275234	15	14	0.289776		227	208	103	0.0872872
2760.14	3623.01	231	204	99	0.261861	0.793428	0.261861	0.793428	15	14	0.813179		228	207	102	0.130931	0.89583	0.130931	0.89583	15	14	0.914475		254	181	76	1.26566	0.205634	1.26566	0.205634	15	14	0.217176		251	184	79	1.13473	0.256488	1.13473	0.256488	15	14	0.270299		227	208	103	0.0872872
2762.06	3620.48	231	204	99	0.261861	0.793428	0.261861	0.793428	15	14	0.813179		227	208	103	0.0872872	0.930443	0.0872872	0.930443	15	14	0.948623		254	181	76	1.26566	0.205634	1.26566	0.205634	15	14	0.217176		251	184	79	1.13473	0.256488	1.13473	0.256488	15	14	0.270299		227	208	103	0.0872872
2763.99	3617.95	230	205	100	0.218218	0.827259	0.218218	0.827259	15	14	0.846694		227	208	103	0.0872872	0.930443	0.0872872	0.930443	15	14	0.948623		254	181	76	1.26566	0.205634	1.26566	0.205634	15	14	0.217176		251	184	79	1.13473	0.256488	1.13473	0.256488	15	14	0.270299		227	208	103	0.0872872
2765.92	3615.43	228	207	102	0.130931	0.89583	0.130931	0.89583	15	14	0.914475		227	208	103	0.0872872	0.930443	0.0872872	0.930443	15	14	0.948623		254	181	76	1.26566	0.205634	1.26566	0.205634	15	14	0.217176		251	184	79	1.13473	0.256488	1.13473	0.256488	15	14	0.270299		227	208	103	0.0872872
2767.85	3612.91	228	207	102	0.130931	0.89583	0.130931	0.89583	15	14	0.914475		228	207	102	0.130931	0.89583	0.130931	0.89583	15	14	0.914475		254	181	76	1.26566	0.205634	1.26566	0.205634	15	14	0.217176		253	182	77	1.22202	0.221701	1.22202	0.221701	15	14	0.234007		227	208	103	0.0872872
2769.78	3610.4	229	206	101	0.174574	0.861414	0.174574	0.861414	15	14	0.880478		229	206	101	0.174574	0.861414	0.174574	0.861414	15	14	0.880478		254	181	76	1.26566	0.205634	1.26566	0.205634	15	14	0.217176		253	182	77	1.22202	0.221701	1.22202	0.221701	15	14	0.234007		227	208	103	0.0872872
2771.71	3607.88	229	206	101	0.174574	0.861414	0.174574	0.861414	15	14	0.880478		229	206	101	0.174574	0.861414	0.174574	0.861414	15	14	0.880478		253	182	77	1.22202	0.221701	1.22202	0.221701	15	14	0.234007		253	182	77	1.22202	0.221701	1.22202	0.221701	15	14	0.234007		227	208	103	0.0872872
2773.64	3605.37	228	207	102	0.130931	0.89583	0.130931	0.89583	15	14	0.914475		229	206	101	0.174574	0.861414	0.174574	0.861414	15	14	0.880478		253	182	77	1.22202	0.221701	1.22202	0.221701	15	14	0.234007		252	183	78	1.17838	0.238647	1.17838	0.238647	15	14	0.251712		227	208	103	0.0872872
2775.57	3602.87	228	207	102	0.130931	0.89583	0.130931	0.89583	15	14	0.914475		229	206	101	0.174574	0.861414	0.174574	0.861414	15	14	0.880478		253	182	77	1.22202	0.221701	1.22202	0.221701	15	14	0.234007		252	183	78	1.17838	0.238647	1.17838	0.238647	15	14	0.251712		227	208	103	0.0872872
2777.5	3600.37	228	207	102	0.130931	0.89583	0.130931	0.89583	15	14	0.914475		229	206	101	0.174574	0.861414	0.174574	0.861414	15	14	0.880478		253	182	77	1.22202	0.221701	1.22202	0.221701	15	14	0.234007		252	183	78	1.17838	0.238647	1.17838	0.238647	15	14	0.251712		227	208	103	0.0872872
2779.42	3597.87	228	207	102	0.130931	0.89583	0.130931	0.89583	15	14	0.914475		228	207	102	0.130931	0.89583	0.130931	0.89583	15	14	0.914475		253	182	77	1.22202	0.221701	1.22202	0.221701	15	14	0.234007		253	182	77	1.22202	0.221701	1.22202	0.221701	15	14	0.234007		227	208	103	0.0872872
2781.35	3595.37	228	207	102	0.130931	0.89583	0.130931	0.89583	15	14	0.914475		228	207	102	0.130931	0.89583	0.130931	0.89583	15	14	0.914475		254	181	76	1.26566	0.205634	1.26566	0.205634	15	14	0.217176		254	181	76	1.26566	0.205634	1.26566	0.205634	15	14	0.217176		227	208	103	0.0872872
2783.28	3592.88	229	206	101	0.174574	0.861414	0.174574	0.861414	15	14	0.880478		228	207	102	0.130931	0.89583	0.130931	0.89583	15	14	0.914475		255	180	75	1.30931	0.190431	1.30931	0.190431	15	14	0.201205		254	181	76	1.26566	0.205634	1.26566	0.205634	15	14	0.217176		227	208	103	0.0872872
2785.21	3590.39	228	207	102	0.130931	0.89583	0.130931	0.89583	15	14	0.914475		229	206	101	0.174574	0.861414	0.174574	0.861414	15	14	0.880478		255	180	75	1.30931	0.190431	1.30931	0.190431	15	14	0.201205		254	181	76	1.26566	0.205634	1.26566	0.205634	15	14	0.217176		226	209	104	0.0436436
2787.14	3587.91	228	207	102	0.130931	0.89583	0.130931	0.89583	15	14	0.914475		229	206	101	0.174574	0.861414	0.174574	0.861414	15	14	0.880478		255	180	75	1.30931	0.190431	1.30931	0.190431	15	14	0.201205		254	181	76	1.26566	0.205634	1.26566	0.205634	15	14	0.217176		226	209	104	0.0436436
2789.07	3585.43	229	206	101	0.174574	0.861414	0.174574	0.861414	15	14	0.880478		229	206	101	0.174574	0.861414	0.174574	0.861414	15	14	0.880478		254	181	76	1.26566	0.205634	1.26566	0.205634	15	14	0.217176		254	181	76	1.26566	0.205634	1.26566	0.205634	15	14	0.217176		226	209	104	0.0436436
2791	3582.95	229	206	101	0.174574	0.861414	0.174574	0.861414	15	14	0.880478		229	206	101	0.174574	0.861414	0.174574	0.861414	15	14	0.880478		255	180	75	1.30931	0.190431	1.30931	0.190431	15	14	0.201205		255	180	75	1.30931	0.190431	1.30931	0.190431	15	14	0.201205		226	209	104	0.0436436
2792.93	3580.47	229	206	101	0.174574	0.861414	0.174574	0.861414	15	14	0.880478		230	205	100	0.218218	0.827259	0.218218	0.827259	15	14	0.846694		255	180	75	1.30931	0.190431	1.30931	0.190431	15	14	0.201205		255	180	75	1.30931	0.190431	1.30931	0.190431	15	14	0.201205		226	209	104	0.0436436
2794.85	3578	228	207	102	0.130931	0.89583	0.130931	0.89583	15	14	0.914475		230	205	100	0.218218	0.827259	0.218218	0.827259	15	14	0.846694		256	179	74	1.35295	0.176072	1.35295	0.176072	15	14	0.186083		255	180	75	1.30931	0.190431	1.30931	0.190431	15	14	0.201205		226	209	104	0.0436436
2796.78	3575.54	229	206	101	0.174574	0.861414	0.174574	0.861414	15	14	0.880478		231	204	99	0.261861	0.793428	0.261861	0.793428	15	14	0.813179		255	180	75	1.30931	0.190431	1.30931	0.190431	15	14	0.201205		255	180	75	1.30931	0.190431	1.30931	0.190431	15	14	0.201205		226	209	104	0.0436436
2798.71	3573.07	231	204	99	0.261861	0.793428	0.261861	0.793428	15	14	0.813179		230	205	100	0.218218	0.827259	0.218218	0.827259	15	14	0.846694		255	180	75	1.30931	0.190431	1.30931	0.190431	15	14	0.201205		255	180	75	1.30931	0.190431	1.30931	0.190431	15	14	0.201205		226	209	104	0.0436436
2800.64	3570.61	229	206	101	0.174574	0.861414	0.174574	0.861414	15	14	0.880478		231	204	99	0.261861	0.793428	0.261861	0.793428	15	14	0.813179		256	179	74	1.35295	0.176072	1.35295	0.176072	15	14	0.186083		255	180	75	1.30931	0.190431	1.30931	0.190431	15	14	0.201205		227	208	103	0.0872872
2802.57	3568.15	230	205	100	0.218218	0.827259	0.218218	0.827259	15	14	0.846694		231	204	99	0.261861	0.793428	0.261861	0.793428	15	14	0.813179		256	179	74	1.35295	0.176072	1.35295	0.176072	15	14	0.186083		256	179	74	1.35295	0.176072	1.35295	0.176072	15	14	0.186083		227	208	103	0.0872872
2804.5	3565.7	229	206	101	0.174574	0.861414	0.174574	0.861414	15	14	0.880478		232	203	98	0.305505	0.759982	0.305505	0.759982	15	14	0.779995		256	179	74	1.35295	0.176072	1.35295	0.176072	15	14	0.186083		256	179	74	1.35295	0.176072	1.35295	0.176072	15	14	0.186083		227	208	103	0.0872872
2806.43	3563.25	229	206	101	0.174574	0.861414	0.174574	0.861414	15	14	0.880478		232	203	98	0.305505	0.759982	0.305505	0.759982	15	14	0.779995		256	179	74	1.35295	0.176072	1.35295	0.176072	15	14	0.186083		256	179	74	1.35295	0.176072	1.35295	0.176072	15	14	0.186083		227	208	103	0.0872872
2808.36	3560.8	229	206	101	0.174574	0.861414	0.174574	0.861414	15	14	0.880478		232	203	98	0.305505	0.759982	0.305505	0.759982	15	14	0.779995		256	179	74	1.35295	0.176072	1.35295	0.176072	15	14	0.186083		256	179	74	1.35295	0.176072	1.35295	0.176072	15	14	0.186083		227	208	103	0.0872872
2810.28	3558.36	229	206	101	0.174574	0.861414	0.174574	0.861414	15	14	0.880478		233	202	97	0.349149	0.726978	0.349149	0.726978	15	14	0.747192		256	179	74	1.35295	0.176072	1.35295	0.176072	15	14	0.186083		256	179	74	1.35295	0.176072	1.35295	0.176072	15	14	0.186083		228	207	102	0.130931
2812.21	3555.92	229	206	101	0.174574	0.861414	0.174574	0.861414	15	14	0.880478		233	202	97	0.349149	0.726978	0.349149	0.726978	15	14	0.747192		257	178	73	1.39659	0.162537	1.39659	0.162537	15	14	0.171789		256	179	74	1.35295	0.176072	1.35295	0.176072	15	14	0.186083		227	208	103	0.0872872
2814.14	3553.48	229	206	101	0.174574	0.861414	0.174574	0.861414	15	14	0.880478		233	202	97	0.349149	0.726978	0.349149	0.726978	15	14	0.747192		255	180	75	1.30931	0.190431	1.30931	0.190431	15	14	0.201205		256	179	74	1.35295	0.176072	1.35295	0.176072	15	14	0.186083		227	208	103	0.0872872
2816.07	3551.05	230	205	100	0.218218	0.827259	0.218218	0.827259	15	14	0.846694		234	201	96	0.392792	0.694473	0.392792	0.694473	15	14	0.71483		255	180	75	1.30931	0.190431	1.30931	0.190431	15	14	0.201205		256	179	74	1.35295	0.176072	1.35295	0.176072	15	14	0.186083		227	208	103	0.0872872
2818	3548.62	229	206	101	0.174574	0.861414	0.174574	0.861414	15	14	0.880478		235	200	95	0.436436	0.662521	0.436436	0.662521	15	14	0.682954		256	179	74	1.35295	0.176072	1.35295	0.176072	15	14	0.186083		257	178	73	1.39659	0.162537	1.39659	0.162537	15	14	0.171789		227	208	103	0.0872872
2819.93	3546.19	230	205	100	0.218218	0.827259	0.218218	0.827259	15	14	0.846694		234	201	96	0.392792	0.694473	0.392792	0.694473	15	14	0.71483		256	179	74	1.35295	0.176072	1.35295	0.176072	15	14	0.186083		256	179	74	1.35295	0.176072	1.35295	0.176072	15	14	0.186083		227	208	103	0.0872872
2821.86	3543.76	230	205	100	0.218218	0.827259	0.218218	0.827259	15	14	0.846694		235	200	95	0.436436	0.662521	0.436436	0.662521	15	14	0.682954		255	180	75	1.30931	0.190431	1.30931	0.190431	15	14	0.201205		257	178	73	1.39659	0.162537	1.39659	0.162537	15	14	0.171789		226	209	104	0.0436436
2823.79	3541.34	230	205	100	0.218218	0.827259	0.218218	0.827259	15	14	0.846694		236	199	94	0.480079	0.631171	0.480079	0.631171	15	14	0.651619		258	177	72	1.44024	0.149801	1.44024	0.149801	15	14	0.158309		257	178	73	1.39659	0.162537	1.39659	0.162537	15	14	0.171789		226	209	104	0.0436436
2825.72	3538.93	230	205	100	0.218218	0.827259	0.218218	0.827259	15	14	0.846694		236	199	94	0.480079	0.631171	0.480079	0.631171	15	14	0.651619		257	178	73	1.39659	0.162537	1.39659	0.162537	15	14	0.171789		257	178	73	1.39659	0.162537	1.39659	0.162537	15	14	0.171789		226	209	104	0.0436436
2827.64	3536.51	230	205	100	0.218218	0.827259	0.218218	0.827259	15	14	0.846694		236	199	94	0.480079	0.631171	0.480079	0.631171	15	14	0.651619		257	178	73	1.39659	0.162537	1.39659	0.162537	15	14	0.171789		256	179	74	1.35295	0.176072	1.35295	0.176072	15	14	0.186083		226	209	104	0.0436436
2829.57	3534.1	231	204	99	0.261861	0.793428	0.261861	0.793428	15	14	0.813179		236	199	94	0.480079	0.631171	0.480079	0.631171	15	14	0.651619		256	179	74	1.35295	0.176072	1.35295	0.176072	15	14	0.186083		256	179	74	1.35295	0.176072	1.35295	0.176072	15	14	0.186083		226	209	104	0.0436436
2831.5	3531.69	232	203	98	0.305505	0.759982	0.305505	0.759982	15	14	0.779995		236	199	94	0.480079	0.631171	0.480079	0.631171	15	14	0.651619		256	179	74	1.35295	0.176072	1.35295	0.176072	15	14	0.186083		257	178	73	1.39659	0.162537	1.39659	0.162537	15	14	0.171789		226	209	104	0.0436436
2833.43	3529.29	232	203	98	0.305505	0.759982	0.305505	0.759982	15	14	0.779995		236	199	94	0.480079	0.631171	0.480079	0.631171	15	14	0.651619		256	179	74	1.35295	0.176072	1.35295	0.176072	15	14	0.186083		258	177	72	1.44024	0.149801	1.44024	0.149801	15	14	0.158309		225	210	105	0
2835.36	3526.89	231	204	99	0.261861	0.793428	0.261861	0.793428	15	14	0.813179		237	198	93	0.523723	0.600472	0.523723	0.600472	15	14	0.620867		257	178	73	1.39659	0.162537	1.39659	0.162537	15	14	0.171789		259	176	71	1.48388	0.137841	1.48388	0.137841	15	14	0.145619		226	209	104	0.0436436
2837.29	3524.49	233	202	97	0.349149	0.726978	0.349149	0.726978	15	14	0.747192		238	197	92	0.567367	0.570466	0.567367	0.570466	15	14	0.590745		257	178	73	1.39659	0.162537	1.39659	0.162537	15	14	0.171789		259	176	71	1.48388	0.137841	1.48388	0.137841	15	14	0.145619		226	209	104	0.0436436
2839.22	3522.1	232	203	98	0.305505	0.759982	0.305505	0.759982	15	14	0.779995		239	196	91	0.61101	0.541193	0.61101	0.541193	15	14	0.561291		257	178	73	1.39659	0.162537	1.39659	0.162537	15	14	0.171789		259	176	71	1.48388	0.137841	1.48388	0.137841	15	14	0.145619		228	207	102	0.130931
2841.15	3519.71	232	203	98	0.305505	0.759982	0.305505	0.759982	15	14	0.779995		240	195	90	0.654654	0.512691	0.654654	0.512691	15	14	0.532545		257	178	73	1.39659	0.162537	1.39659	0.162537	15	14	0.171789		259	176	71	1.48388	0.137841	1.48388	0.137841	15	14	0.145619		229	206	101	0.174574
2843.07	3517.32	234	201	96	0.392792	0.694473	0.392792	0.694473	15	14	0.71483		241	194	89	0.698297	0.484992	0.698297	0.484992	15	14	0.504539		258	177	72	1.44024	0.149801	1.44024	0.149801	15	14	0.158309		260	175	70	1.52753	0.126631	1.52753	0.126631	15	14	0.1337		231	204	99	0.261861
2845	3514.93	235	200	95	0.436436	0.662521	0.436436	0.662521	15	14	0.682954		242	193	88	0.741941	0.458124	0.741941	0.458124	15	14	0.477307		257	178	73	1.39659	0.162537	1.39659	0.162537	15	14	0.171789		260	175	70	1.52753	0.126631	1.52753	0.126631	15	14	0.1337		230	205	100	0.218218
2846.93	3512.55	234	201	96	0.392792	0.694473	0.392792	0.694473	15	14	0.71483		245	190	85	0.872872	0.382734	0.872872	0.382734	15	14	0.400494		257	178	73	1.39659	0.162537	1.39659	0.162537	15	14	0.171789		260	175	70	1.52753	0.126631	1.52753	0.126631	15	14	0.1337		233	202	97	0.349149
2848.86	3510.17	236	199	94	0.480079	0.631171	0.480079	0.631171	15	14	0.651619		247	188	83	0.960159	0.336976	0.960159	0.336976	15	14	0.353554		257	178	73	1.39659	0.162537	1.39659	0.162537	15	14	0.171789		260	175	70	1.52753	0.126631	1.52753	0.126631	15	14	0.1337		233	202	97	0.349149
2850.79	3507.8	237	198	93	0.523723	0.600472	0.523723	0.600472	15	14	0.620867		246	189	84	0.916515	0.359397	0.916515	0.359397	15	14	0.376588		257	178	73	1.39659	0.162537	1.39659	0.162537	15	14	0.171789		262	173	68	1.61481	0.106352	1.61481	0.106352	15	14	0.11207		233	202	97	0.349149
2852.72	3505.43	236	199	94	0.480079	0.631171	0.480079	0.631171	15	14	0.651619		247	188	83	0.960159	0.336976	0.960159	0.336976	15	14	0.353554		257	178	73	1.39659	0.162537	1.39659	0.162537	15	14	0.171789		261	174	69	1.57117	0.116144	1.57117	0.116144	15	14	0.122524		232	203	98	0.305505
2854.65	3503.06	236	199	94	0.480079	0.631171	0.480079	0.631171	15	14	0.651619		246	189	84	0.916515	0.359397	0.916515	0.359397	15	14	0.376588		257	178	73	1.39659	0.162537	1.39659	0.162537	15	14	0.171789		261	174	69	1.57117	0.116144	1.57117	0.116144	15	14	0.122524		233	202	97	0.349149
2856.58	3500.69	236	199	94	0.480079	0.631171	0.480079	0.631171	15	14	0.651619		242	193	88	0.741941	0.458124	0.741941	0.458124	15	14	0.477307		257	178	73	1.39659	0.162537	1.39659	0.162537	15	14	0.171789		261	174	69	1.57117	0.116144	1.57117	0.116144	15	14	0.122524		233	202	97	0.349149
2858.51	3498.33	236	199	94	0.480079	0.631171	0.480079	0.631171	15	14	0.651619		243	192	87	0.785584	0.432112	0.785584	0.432112	15	14	0.450872		258	177	72	1.44024	0.149801	1.44024	0.149801	15	14	0.158309		261	174	69	1.57117	0.116144	1.57117	0.116144	15	14	0.122524		233	202	97	0.349149
2860.43	3495.97	236	199	94	0.480079	0.631171	0.480079	0.631171	15	14	0.651619		243	192	87	0.785584	0.432112	0.785584	0.432112	15	14	0.450872		257	178	73	1.39659	0.162537	1.39659	0.162537	15	14	0.171789		262	173	68	1.61481	0.106352	1.61481	0.106352	15	14	0.11207		233	202	97	0.349149
2862.36	3493.62	237	198	93	0.523723	0.600472	0.523723	0.600472	15	14	0.620867		243	192	87	0.785584	0.432112	0.785584	0.432112	15	14	0.450872		259	176	71	1.48388	0.137841	1.48388	0.137841	15	14	0.145619		263	172	67	1.65846	0.0972264	1.65846	0.0972264	15	14	0.102309		231	204	99	0.261861
2864.29	3491.26	237	198	93	0.523723	0.600472	0.523723	0.600472	15	14	0.620867		242	193	88	0.741941	0.458124	0.741941	0.458124	15	14	0.477307		259	176	71	1.48388	0.137841	1.48388	0.137841	15	14	0.145619		263	172	67	1.65846	0.0972264	1.65846	0.0972264	15	14	0.102309		232	203	98	0.305505
2866.22	3488.92	237	198	93	0.523723	0.600472	0.523723	0.600472	15	14	0.620867		240	195	90	0.654654	0.512691	0.654654	0.512691	15	14	0.532545		258	177	72	1.44024	0.149801	1.44024	0.149801	15	14	0.158309		263	172	67	1.65846	0.0972264	1.65846	0.0972264	15	14	0.102309		232	203	98	0.305505
2868.15	3486.57	237	198	93	0.523723	0.600472	0.523723	0.600472	15	14	0.620867		240	195	90	0.654654	0.512691	0.654654	0.512691	15	14	0.532545		259	176	71	1.48388	0.137841	1.48388	0.137841	15	14	0.145619		263	172	67	1.65846	0.0972264	1.65846	0.0972264	15	14	0.102309		233	202	97	0.349149
2870.08	3484.23	237	198	93	0.523723	0.600472	0.523723	0.600472	15	14	0.620867		240	195	90	0.654654	0.512691	0.654654	0.512691	15	14	0.532545		257	178	73	1.39659	0.162537	1.39659	0.162537	15	14	0.171789		263	172	67	1.65846	0.0972264	1.65846	0.0972264	15	14	0.102309		232	203	98	0.305505
2872.01	3481.89	236	199	94	0.480079	0.631171	0.480079	0.631171	15	14	0.651619		241	194	89	0.698297	0.484992	0.698297	0.484992	15	14	0.504539		257	178	73	1.39659	0.162537	1.39659	0.162537	15	14	0.171789		263	172	67	1.65846	0.0972264	1.65846	0.0972264	15	14	0.102309		232	203	98	0.305505
2873.94	3479.55	236	199	94	0.480079	0.631171	0.480079	0.631171	15	14	0.651619		241	194	89	0.698297	0.484992	0.698297	0.484992	15	14	0.504539		257	178	73	1.39659	0.162537	1.39659	0.162537	15	14	0.171789		263	172	67	1.65846	0.0972264	1.65846	0.0972264	15	14	0.102309		232	203	98	0.305505
2875.86	3477.22	236	199	94	0.480079	0.631171	0.480079	0.631171	15	14	0.651619		241	194	89	0.698297	0.484992	0.698297	0.484992	15	14	0.504539		257	178	73	1.39659	0.162537	1.39659	0.162537	15	14	0.171789		263	172	67	1.65846	0.0972264	1.65846	0.0972264	15	14	0.102309		232	203	98	0.305505
2877.79	3474.88	236	199	94	0.480079	0.631171	0.480079	0.631171	15	14	0.651619		242	193	88	0.741941	0.458124	0.741941	0.458124	15	14	0.477307		258	177	72	1.44024	0.149801	1.44024	0.149801	15	14	0.158309		264	171	66	1.7021	0.0887377	1.7021	0.0887377	15	14	0.0932157		233	202	97	0.349149
2879.72	3472.56	236	199	94	0.480079	0.631171	0.480079	0.631171	15	14	0.651619		244	191	86	0.829228	0.406976	0.829228	0.406976	15	14	0.425262		258	177	72	1.44024	0.149801	1.44024	0.149801	15	14	0.158309		264	171	66	1.7021	0.0887377	1.7021	0.0887377	15	14	0.0932157		233	202	97	0.349149
2881.65	3470.23	237	198	93	0.523723	0.600472	0.523723	0.600472	15	14	0.620867		244	191	86	0.829228	0.406976	0.829228	0.406976	15	14	0.425262		258	177	72	1.44024	0.149801	1.44024	0.149801	15	14	0.158309		263	172	67	1.65846	0.0972264	1.65846	0.0972264	15	14	0.102309		233	202	97	0.349149
2883.58	3467.91	236	199	94	0.480079	0.631171	0.480079	0.631171	15	14	0.651619		244	191	86	0.829228	0.406976	0.829228	0.406976	15	14	0.425262		258	177	72	1.44024	0.149801	1.44024	0.149801	15	14	0.158309		263	172	67	1.65846	0.0972264	1.65846	0.0972264	15	14	0.102309		233	202	97	0.349149
2885.51	3465.59	236	199	94	0.480079	0.631171	0.480079	0.631171	15	14	0.651619		246	189	84	0.916515	0.359397	0.916515	0.359397	15	14	0.376588		258	177	72	1.44024	0.149801	1.44024	0.149801	15	14	0.158309		264	171	66	1.7021	0.0887377	1.7021	0.0887377	15	14	0.0932157		232	203	98	0.305505
2887.44	3463.28	235	200	95	0.436436	0.662521	0.436436	0.662521	15	14	0.682954		246	189	84	0.916515	0.359397	0.916515	0.359397	15	14	0.376588		258	177	72	1.44024	0.149801	1.44024	0.149801	15	14	0.158309		265	170	65	1.74574	0.0808565	1.74574	0.0808565	15	14	0.0847612		233	202	97	0.349149
2889.37	3460.97	235	200	95	0.436436	0.662521	0.436436	0.662521	15	14	0.682954		246	189	84	0.916515	0.359397	0.916515	0.359397	15	14	0.376588		258	177	72	1.44024	0.149801	1.44024	0.149801	15	14	0.158309		267	168	63	1.83303	0.066799	1.83303	0.066799	15	14	0.0696586		234	201	96	0.392792
2891.3	3458.66	236	199	94	0.480079	0.631171	0.480079	0.631171	15	14	0.651619		246	189	84	0.916515	0.359397	0.916515	0.359397	15	14	0.376588		258	177	72	1.44024	0.149801	1.44024	0.149801	15	14	0.158309		267	168	63	1.83303	0.066799	1.83303	0.066799	15	14	0.0696586		233	202	97	0.349149
2893.22	3456.35	238	197	92	0.567367	0.570466	0.567367	0.570466	15	14	0.590745		246	189	84	0.916515	0.359397	0.916515	0.359397	15	14	0.376588		258	177	72	1.44024	0.149801	1.44024	0.149801	15	14	0.158309		267	168	63	1.83303	0.066799	1.83303	0.066799	15	14	0.0696586		233	202	97	0.349149
2895.15	3454.05	237	198	93	0.523723	0.600472	0.523723	0.600472	15	14	0.620867		246	189	84	0.916515	0.359397	0.916515	0.359397	15	14	0.376588		257	178	73	1.39659	0.162537	1.39659	0.162537	15	14	0.171789		266	169	64	1.78939	0.0735535	1.78939	0.0735535	15	14	0.076919		233	202	97	0.349149
2897.08	3451.75	237	198	93	0.523723	0.600472	0.523723	0.600472	15	14	0.620867		246	189	84	0.916515	0.359397	0.916515	0.359397	15	14	0.376588		257	178	73	1.39659	0.162537	1.39659	0.162537	15	14	0.171789		266	169	64	1.78939	0.0735535	1.78939	0.0735535	15	14	0.076919		233	202	97	0.349149
2899.01	3449.45	237	198	93	0.523723	0.600472	0.523723	0.600472	15	14	0.620867		246	189	84	0.916515	0.359397	0.916515	0.359397	15	14	0.376588		258	177	72	1.44024	0.149801	1.44024	0.149801	15	14	0.158309		267	168	63	1.83303	0.066799	1.83303	0.066799	15	14	0.0696586		233	202	97	0.349149
2900.94	3447.16	239	196	91	0.61101	0.541193	0.61101	0.541193	15	14	0.561291		246	189	84	0.916515	0.359397	0.916515	0.359397	15	14	0.376588		258	177	72	1.44024	0.149801	1.44024	0.149801	15	14	0.158309		267	168	63	1.83303	0.066799	1.83303	0.066799	15	14	0.0696586		232	203	98	0.305505
2902.87	3444.87	240	195	90	0.654654	0.512691	0.654654	0.512691	15	14	0.532545		246	189	84	0.916515	0.359397	0.916515	0.359397	15	14	0.376588		257	178	73	1.39659	0.162537	1.39659	0.162537	15	14	0.171789		267	168	63	1.83303	0.066799	1.83303	0.066799	15	14	0.0696586		232	203	98	0.305505
2904.8	3442.58	240	195	90	0.654654	0.512691	0.654654	0.512691	15	14	0.532545		246	189	84	0.916515	0.359397	0.916515	0.359397	15	14	0.376588		257	178	73	1.39659	0.162537	1.39659	0.162537	15	14	0.171789		267	168	63	1.83303	0.066799	1.83303	0.066799	15	14	0.0696586		232	203	98	0.305505
2906.73	3440.3	242	193	88	0.741941	0.458124	0.741941	0.458124	15	14	0.477307		245	190	85	0.872872	0.382734	0.872872	0.382734	15	14	0.400494		258	177	72	1.44024	0.149801	1.44024	0.149801	15	14	0.158309		267	168	63	1.83303	0.066799	1.83303	0.066799	15	14	0.0696586		232	203	98	0.305505
2908.65	3438.02	240	195	90	0.654654	0.512691	0.654654	0.512691	15	14	0.532545		246	189	84	0.916515	0.359397	0.916515	0.359397	15	14	0.376588		259	176	71	1.48388	0.137841	1.48388	0.137841	15	14	0.145619		267	168	63	1.83303	0.066799	1.83303	0.066799	15	14	0.0696586		232	203	98	0.305505
2910.58	3435.74	241	194	89	0.698297	0.484992	0.698297	0.484992	15	14	0.504539		248	187	82	1.0038	0.315475	1.0038	0.315475	15	14	0.331405		260	175	70	1.52753	0.126631	1.52753	0.126631	15	14	0.1337		267	168	63	1.83303	0.066799	1.83303	0.066799	15	14	0.0696586		232	203	98	0.305505
2912.51	3433.46	241	194	89	0.698297	0.484992	0.698297	0.484992	15	14	0.504539		250	185	80	1.09109	0.275234	1.09109	0.275234	15	14	0.289776		258	177	72	1.44024	0.149801	1.44024	0.149801	15	14	0.158309		267	168	63	1.83303	0.066799	1.83303	0.066799	15	14	0.0696586		233	202	97	0.349149
2914.44	3431.19	240	195	90	0.654654	0.512691	0.654654	0.512691	15	14	0.532545		251	184	79	1.13473	0.256488	1.13473	0.256488	15	14	0.270299		258	177	72	1.44024	0.149801	1.44024	0.149801	15	14	0.158309		268	167	62	1.87667	0.0605637	1.87667	0.0605637	15	14	0.0629534		232	203	98	0.305505
2916.37	3428.92	240	195	90	0.654654	0.512691	0.654654	0.512691	15	14	0.532545		249	186	81	1.04745	0.294895	1.04745	0.294895	15	14	0.310143		258	177	72	1.44024	0.149801	1.44024	0.149801	15	14	0.158309		269	166	61	1.92032	0.0548187	1.92032	0.0548187	15	14	0.0567726		233	202	97	0.349149
2918.3	3426.65	240	195	90	0.654654	0.512691	0.654654	0.512691	15	14	0.532545		250	185	80	1.09109	0.275234	1.09109	0.275234	15	14	0.289776		258	177	72	1.44024	0.149801	1.44024	0.149801	15	14	0.158309		269	166	61	1.92032	0.0548187	1.92032	0.0548187	15	14	0.0567726		233	202	97	0.349149
2920.23	3424.39	240	195	90	0.654654	0.512691	0.654654	0.512691	15	14	0.532545		249	186	81	1.04745	0.294895	1.04745	0.294895	15	14	0.310143		258	177	72	1.44024	0.149801	1.44024	0.149801	15	14	0.158309		270	165	60	1.96396	0.0495355	1.96396	0.0495355	15	14	0.0510899		232	203	98	0.305505
2922.16	3422.13	240	195	90	0.654654	0.512691	0.654654	0.512691	15	14	0.532545		249	186	81	1.04745	0.294895	1.04745	0.294895	15	14	0.310143		258	177	72	1.44024	0.149801	1.44024	0.149801	15	14	0.158309		270	165	60	1.96396	0.0495355	1.96396	0.0495355	15	14	0.0510899		232	203	98	0.305505
2924.09	3419.87	240	195	90	0.654654	0.512691	0.654654	0.512691	15	14	0.532545		249	186	81	1.04745	0.294895	1.04745	0.294895	15	14	0.310143		258	177	72	1.44024	0.149801	1.44024	0.149801	15	14	0.158309		271	164	59	2.0076	0.0446862	2.0076	0.0446862	15	14	0.045875		232	203	98	0.305505
2926.01	3417.62	242	193	88	0.741941	0.458124	0.741941	0.458124	15	14	0.477307		249	186	81	1.04745	0.294895	1.04745	0.294895	15	14	0.310143		259	176	71	1.48388	0.137841	1.48388	0.137841	15	14	0.145619		270	165	60	1.96396	0.0495355	1.96396	0.0495355	15	14	0.0510899		233	202	97	0.349149
2927.94	3415.37	243	192	87	0.785584	0.432112	0.785584	0.432112	15	14	0.450872		250	185	80	1.09109	0.275234	1.09109	0.275234	15	14	0.289776		259	176	71	1.48388	0.137841	1.48388	0.137841	15	14	0.145619		270	165	60	1.96396	0.0495355	1.96396	0.0495355	15	14	0.0510899		235	200	95	0.436436
2929.87	3413.12	245	190	85	0.872872	0.382734	0.872872	0.382734	15	14	0.400494		249	186	81	1.04745	0.294895	1.04745	0.294895	15	14	0.310143		258	177	72	1.44024	0.149801	1.44024	0.149801	15	14	0.158309		272	163	58	2.05125	0.0402436	2.05125	0.0402436	15	14	0.041102	2.0458e-72	234	201	96	0.392792
2931.8	3410.87	245	190	85	0.872872	0.382734	0.872872	0.382734	15	14	0.400494		250	185	80	1.09109	0.275234	1.09109	0.275234	15	14	0.289776		257	178	73	1.39659	0.162537	1.39659	0.162537	15	14	0.171789		272	163	58	2.05125	0.0402436	2.05125	0.0402436	15	14	0.041102		234	201	96	0.392792
2933.73	3408.63	245	190	85	0.872872	0.382734	0.872872	0.382734	15	14	0.400494		249	186	81	1.04745	0.294895	1.04745	0.294895	15	14	0.310143		257	178	73	1.39659	0.162537	1.39659	0.162537	15	14	0.171789		271	164	59	2.0076	0.0446862	2.0076	0.0446862	15	14	0.045875		235	200	95	0.436436
2935.66	3406.39	245	190	85	0.872872	0.382734	0.872872	0.382734	15	14	0.400494		250	185	80	1.09109	0.275234	1.09109	0.275234	15	14	0.289776		258	177	72	1.44024	0.149801	1.44024	0.149801	15	14	0.158309		273	162	57	2.09489	0.0361814	2.09489	0.0361814	15	14	0.0367421		235	200	95	0.436436
2937.59	3404.15	245	190	85	0.872872	0.382734	0.872872	0.382734	15	14	0.400494		251	184	79	1.13473	0.256488	1.13473	0.256488	15	14	0.270299		258	177	72	1.44024	0.149801	1.44024	0.149801	15	14	0.158309		273	162	57	2.09489	0.0361814	2.09489	0.0361814	15	14	0.0367421		236	199	94	0.480079
2939.52	3401.92	245	190	85	0.872872	0.382734	0.872872	0.382734	15	14	0.400494		250	185	80	1.09109	0.275234	1.09109	0.275234	15	14	0.289776		258	177	72	1.44024	0.149801	1.44024	0.149801	15	14	0.158309		274	161	56	2.13854	0.0324741	2.13854	0.0324741	15	14	0.0327702		236	199	94	0.480079
2941.44	3399.69	245	190	85	0.872872	0.382734	0.872872	0.382734	15	14	0.400494		250	185	80	1.09109	0.275234	1.09109	0.275234	15	14	0.289776		259	176	71	1.48388	0.137841	1.48388	0.137841	15	14	0.145619		273	162	57	2.09489	0.0361814	2.09489	0.0361814	15	14	0.0367421		238	197	92	0.567367
2943.37	3397.46	245	190	85	0.872872	0.382734	0.872872	0.382734	15	14	0.400494		251	184	79	1.13473	0.256488	1.13473	0.256488	15	14	0.270299		258	177	72	1.44024	0.149801	1.44024	0.149801	15	14	0.158309		272	163	58	2.05125	0.0402436	2.05125	0.0402436	15	14	0.041102		239	196	91	0.61101
2945.3	3395.24	246	189	84	0.916515	0.359397	0.916515	0.359397	15	14	0.376588		251	184	79	1.13473	0.256488	1.13473	0.256488	15	14	0.270299		258	177	72	1.44024	0.149801	1.44024	0.149801	15	14	0.158309		272	163	58	2.05125	0.0402436	2.05125	0.0402436	15	14	0.041102		240	195	90	0.654654
2947.23	3393.02	245	190	85	0.872872	0.382734	0.872872	0.382734	15	14	0.400494		251	184	79	1.13473	0.256488	1.13473	0.256488	15	14	0.270299		258	177	72	1.44024	0.149801	1.44024	0.149801	15	14	0.158309		272	163	58	2.05125	0.0402436	2.05125	0.0402436	15	14	0.041102		240	195	90	0.654654
2949.16	3390.8	245	190	85	0.872872	0.382734	0.872872	0.382734	15	14	0.400494		252	183	78	1.17838	0.238647	1.17838	0.238647	15	14	0.251712		258	177	72	1.44024	0.149801	1.44024	0.149801	15	14	0.158309		272	163	58	2.05125	0.0402436	2.05125	0.0402436	15	14	0.041102		241	194	89	0.698297
2951.09	3388.58	245	190	85	0.872872	0.382734	0.872872	0.382734	15	14	0.400494		252	183	78	1.17838	0.238647	1.17838	0.238647	15	14	0.251712		258	177	72	1.44024	0.149801	1.44024	0.149801	15	14	0.158309		272	163	58	2.05125	0.0402436	2.05125	0.0402436	15	14	0.041102		240	195	90	0.654654
2953.02	3386.37	244	191	86	0.829228	0.406976	0.829228	0.406976	15	14	0.425262		251	184	79	1.13473	0.256488	1.13473	0.256488	15	14	0.270299		258	177	72	1.44024	0.149801	1.44024	0.149801	15	14	0.158309		271	164	59	2.0076	0.0446862	2.0076	0.0446862	15	14	0.045875		241	194	89	0.698297
2954.95	3384.16	244	191	86	0.829228	0.406976	0.829228	0.406976	15	14	0.425262		252	183	78	1.17838	0.238647	1.17838	0.238647	15	14	0.251712		258	177	72	1.44024	0.149801	1.44024	0.149801	15	14	0.158309		271	164	59	2.0076	0.0446862	2.0076	0.0446862	15	14	0.045875		241	194	89	0.698297
2956.87	3381.95	245	190	85	0.872872	0.382734	0.872872	0.382734	15	14	0.400494		253	182	77	1.22202	0.221701	1.22202	0.221701	15	14	0.234007		259	176	71	1.48388	0.137841	1.48388	0.137841	15	14	0.145619		272	163	58	2.05125	0.0402436	2.05125	0.0402436	15	14	0.041102		241	194	89	0.698297
2958.8	3379.74	244	191	86	0.829228	0.406976	0.829228	0.406976	15	14	0.425262		252	183	78	1.17838	0.238647	1.17838	0.238647	15	14	0.251712		259	176	71	1.48388	0.137841	1.48388	0.137841	15	14	0.145619		273	162	57	2.09489	0.0361814	2.09489	0.0361814	15	14	0.0367421		241	194	89	0.698297
2960.73	3377.54	243	192	87	0.785584	0.432112	0.785584	0.432112	15	14	0.450872		251	184	79	1.13473	0.256488	1.13473	0.256488	15	14	0.270299		259	176	71	1.48388	0.137841	1.48388	0.137841	15	14	0.145619		272	163	58	2.05125	0.0402436	2.05125	0.0402436	15	14	0.041102		241	194	89	0.698297
2962.66	3375.34	244	191	86	0.829228	0.406976	0.829228	0.406976	15	14	0.425262		250	185	80	1.09109	0.275234	1.09109	0.275234	15	14	0.289776		260	175	70	1.52753	0.126631	1.52753	0.126631	15	14	0.1337		271	164	59	2.0076	0.0446862	2.0076	0.0446862	15	14	0.045875		241	194	89	0.698297
2964.59	3373.15	244	191	86	0.829228	0.406976	0.829228	0.406976	15	14	0.425262		249	186	81	1.04745	0.294895	1.04745	0.294895	15	14	0.310143		261	174	69	1.57117	0.116144	1.57117	0.116144	15	14	0.122524		272	163	58	2.05125	0.0402436	2.05125	0.0402436	15	14	0.041102		241	194	89	0.698297
2966.52	3370.95	243	192	87	0.785584	0.432112	0.785584	0.432112	15	14	0.450872		251	184	79	1.13473	0.256488	1.13473	0.256488	15	14	0.270299		261	174	69	1.57117	0.116144	1.57117	0.116144	15	14	0.122524		271	164	59	2.0076	0.0446862	2.0076	0.0446862	15	14	0.045875		241	194	89	0.698297
2968.45	3368.76	244	191	86	0.829228	0.406976	0.829228	0.406976	15	14	0.425262		251	184	79	1.13473	0.256488	1.13473	0.256488	15	14	0.270299		260	175	70	1.52753	0.126631	1.52753	0.126631	15	14	0.1337		272	163	58	2.05125	0.0402436	2.05125	0.0402436	15	14	0.041102		239	196	91	0.61101
2970.38	3366.58	245	190	85	0.872872	0.382734	0.872872	0.382734	15	14	0.400494		253	182	77	1.22202	0.221701	1.22202	0.221701	15	14	0.234007		260	175	70	1.52753	0.126631	1.52753	0.126631	15	14	0.1337		272	163	58	2.05125	0.0402436	2.05125	0.0402436	15	14	0.041102		238	197	92	0.567367
2972.31	3364.39	247	188	83	0.960159	0.336976	0.960159	0.336976	15	14	0.353554		253	182	77	1.22202	0.221701	1.22202	0.221701	15	14	0.234007		261	174	69	1.57117	0.116144	1.57117	0.116144	15	14	0.122524		272	163	58	2.05125	0.0402436	2.05125	0.0402436	15	14	0.041102		238	197	92	0.567367
2974.23	3362.21	248	187	82	1.0038	0.315475	1.0038	0.315475	15	14	0.331405		255	180	75	1.30931	0.190431	1.30931	0.190431	15	14	0.201205		262	173	68	1.61481	0.106352	1.61481	0.106352	15	14	0.11207		272	163	58	2.05125	0.0402436	2.05125	0.0402436	15	14	0.041102		238	197	92	0.567367
2976.16	3360.03	249	186	81	1.04745	0.294895	1.04745	0.294895	15	14	0.310143		253	182	77	1.22202	0.221701	1.22202	0.221701	15	14	0.234007		261	174	69	1.57117	0.116144	1.57117	0.116144	15	14	0.122524		272	163	58	2.05125	0.0402436	2.05125	0.0402436	15	14	0.041102		237	198	93	0.523723
2978.09	3357.85	249	186	81	1.04745	0.294895	1.04745	0.294895	15	14	0.310143		251	184	79	1.13473	0.256488	1.13473	0.256488	15	14	0.270299		262	173	68	1.61481	0.106352	1.61481	0.106352	15	14	0.11207		274	161	56	2.13854	0.0324741	2.13854	0.0324741	15	14	0.0327702		237	198	93	0.523723
2980.02	3355.68	248	187	82	1.0038	0.315475	1.0038	0.315475	15	14	0.331405		253	182	77	1.22202	0.221701	1.22202	0.221701	15	14	0.234007		262	173	68	1.61481	0.106352	1.61481	0.106352	15	14	0.11207		273	162	57	2.09489	0.0361814	2.09489	0.0361814	15	14	0.0367421		236	199	94	0.480079
2981.95	3353.51	248	187	82	1.0038	0.315475	1.0038	0.315475	15	14	0.331405		252	183	78	1.17838	0.238647	1.17838	0.238647	15	14	0.251712		261	174	69	1.57117	0.116144	1.57117	0.116144	15	14	0.122524		272	163	58	2.05125	0.0402436	2.05125	0.0402436	15	14	0.041102		238	197	92	0.567367
2983.88	3351.34	246	189	84	0.916515	0.359397	0.916515	0.359397	15	14	0.376588		252	183	78	1.17838	0.238647	1.17838	0.238647	15	14	0.251712		262	173	68	1.61481	0.106352	1.61481	0.106352	15	14	0.11207		274	161	56	2.13854	0.0324741	2.13854	0.0324741	15	14	0.0327702		236	199	94	0.480079
2985.81	3349.18	248	187	82	1.0038	0.315475	1.0038	0.315475	15	14	0.331405		254	181	76	1.26566	0.205634	1.26566	0.205634	15	14	0.217176		262	173	68	1.61481	0.106352	1.61481	0.106352	15	14	0.11207		274	161	56	2.13854	0.0324741	2.13854	0.0324741	15	14	0.0327702		236	199	94	0.480079
2987.74	3347.02	248	187	82	1.0038	0.315475	1.0038	0.315475	15	14	0.331405		254	181	76	1.26566	0.205634	1.26566	0.205634	15	14	0.217176		262	173	68	1.61481	0.106352	1.61481	0.106352	15	14	0.11207		276	159	54	2.22582	0.0260268	2.22582	0.0260268	15	14	0.025885		236	199	94	0.480079
2989.66	3344.86	247	188	83	0.960159	0.336976	0.960159	0.336976	15	14	0.353554		253	182	77	1.22202	0.221701	1.22202	0.221701	15	14	0.234007		262	173	68	1.61481	0.106352	1.61481	0.106352	15	14	0.11207		276	159	54	2.22582	0.0260268	2.22582	0.0260268	15	14	0.025885		236	199	94	0.480079
2991.59	3342.7	248	187	82	1.0038	0.315475	1.0038	0.315475	15	14	0.331405		253	182	77	1.22202	0.221701	1.22202	0.221701	15	14	0.234007		262	173	68	1.61481	0.106352	1.61481	0.106352	15	14	0.11207		274	161	56	2.13854	0.0324741	2.13854	0.0324741	15	14	0.0327702		236	199	94	0.480079
2993.52	3340.55	251	184	79	1.13473	0.256488	1.13473	0.256488	15	14	0.270299		252	183	78	1.17838	0.238647	1.17838	0.238647	15	14	0.251712		260	175	70	1.52753	0.126631	1.52753	0.126631	15	14	0.1337		273	162	57	2.09489	0.0361814	2.09489	0.0361814	15	14	0.0367421		235	200	95	0.436436
2995.45	3338.4	251	184	79	1.13473	0.256488	1.13473	0.256488	15	14	0.270299		251	184	79	1.13473	0.256488	1.13473	0.256488	15	14	0.270299		258	177	72	1.44024	0.149801	1.44024	0.149801	15	14	0.158309		274	161	56	2.13854	0.0324741	2.13854	0.0324741	15	14	0.0327702		235	200	95	0.436436
2997.38	3336.25	251	184	79	1.13473	0.256488	1.13473	0.256488	15	14	0.270299		250	185	80	1.09109	0.275234	1.09109	0.275234	15	14	0.289776		258	177	72	1.44024	0.149801	1.44024	0.149801	15	14	0.158309		275	160	55	2.18218	0.0290971	2.18218	0.0290971	15	14	0.029159		234	201	96	0.392792
2999.31	3334.1	251	184	79	1.13473	0.256488	1.13473	0.256488	15	14	0.270299		249	186	81	1.04745	0.294895	1.04745	0.294895	15	14	0.310143		257	178	73	1.39659	0.162537	1.39659	0.162537	15	14	0.171789		274	161	56	2.13854	0.0324741	2.13854	0.0324741	15	14	0.0327702		234	201	96	0.392792
3001.24	3331.96	255	180	75	1.30931	0.190431	1.30931	0.190431	15	14	0.201205		250	185	80	1.09109	0.275234	1.09109	0.275234	15	14	0.289776		256	179	74	1.35295	0.176072	1.35295	0.176072	15	14	0.186083		272	163	58	2.05125	0.0402436	2.05125	0.0402436	15	14	0.041102		235	200	95	0.436436
3003.17	3329.82	255	180	75	1.30931	0.190431	1.30931	0.190431	15	14	0.201205		248	187	82	1.0038	0.315475	1.0038	0.315475	15	14	0.331405		254	181	76	1.26566	0.205634	1.26566	0.205634	15	14	0.217176		272	163	58	2.05125	0.0402436	2.05125	0.0402436	15	14	0.041102		236	199	94	0.480079
3005.1	3327.68	254	181	76	1.26566	0.205634	1.26566	0.205634	15	14	0.217176		251	184	79	1.13473	0.256488	1.13473	0.256488	15	14	0.270299		255	180	75	1.30931	0.190431	1.30931	0.190431	15	14	0.201205		274	161	56	2.13854	0.0324741	2.13854	0.0324741	15	14	0.0327702		236	199	94	0.480079
3007.02	3325.55	254	181	76	1.26566	0.205634	1.26566	0.205634	15	14	0.217176		250	185	80	1.09109	0.275234	1.09109	0.275234	15	14	0.289776		257	178	73	1.39659	0.162537	1.39659	0.162537	15	14	0.171789		274	161	56	2.13854	0.0324741	2.13854	0.0324741	15	14	0.0327702		233	202	97	0.349149
3008.95	3323.42	255	180	75	1.30931	0.190431	1.30931	0.190431	15	14	0.201205		250	185	80	1.09109	0.275234	1.09109	0.275234	15	14	0.289776		253	182	77	1.22202	0.221701	1.22202	0.221701	15	14	0.234007		274	161	56	2.13854	0.0324741	2.13854	0.0324741	15	14	0.0327702		232	203	98	0.305505
3010.88	3321.29	256	179	74	1.35295	0.176072	1.35295	0.176072	15	14	0.186083		251	184	79	1.13473	0.256488	1.13473	0.256488	15	14	0.270299		253	182	77	1.22202	0.221701	1.22202	0.221701	15	14	0.234007		273	162	57	2.09489	0.0361814	2.09489	0.0361814	15	14	0.0367421		235	200	95	0.436436
3012.81	3319.16	257	178	73	1.39659	0.162537	1.39659	0.162537	15	14	0.171789		251	184	79	1.13473	0.256488	1.13473	0.256488	15	14	0.270299		254	181	76	1.26566	0.205634	1.26566	0.205634	15	14	0.217176		274	161	56	2.13854	0.0324741	2.13854	0.0324741	15	14	0.0327702		234	201	96	0.392792
3014.74	3317.04	258	177	72	1.44024	0.149801	1.44024	0.149801	15	14	0.158309		253	182	77	1.22202	0.221701	1.22202	0.221701	15	14	0.234007		257	178	73	1.39659	0.162537	1.39659	0.162537	15	14	0.171789		275	160	55	2.18218	0.0290971	2.18218	0.0290971	15	14	0.029159		233	202	97	0.349149
3016.67	3314.92	258	177	72	1.44024	0.149801	1.44024	0.149801	15	14	0.158309		249	186	81	1.04745	0.294895	1.04745	0.294895	15	14	0.310143		254	181	76	1.26566	0.205634	1.26566	0.205634	15	14	0.217176		275	160	55	2.18218	0.0290971	2.18218	0.0290971	15	14	0.029159		234	201	96	0.392792
3018.6	3312.8	257	178	73	1.39659	0.162537	1.39659	0.162537	15	14	0.171789		246	189	84	0.916515	0.359397	0.916515	0.359397	15	14	0.376588		255	180	75	1.30931	0.190431	1.30931	0.190431	15	14	0.201205		275	160	55	2.18218	0.0290971	2.18218	0.0290971	15	14	0.029159		234	201	96	0.392792
3020.53	3310.68	257	178	73	1.39659	0.162537	1.39659	0.162537	15	14	0.171789		245	190	85	0.872872	0.382734	0.872872	0.382734	15	14	0.400494		253	182	77	1.22202	0.221701	1.22202	0.221701	15	14	0.234007		275	160	55	2.18218	0.0290971	2.18218	0.0290971	15	14	0.029159		236	199	94	0.480079
3022.45	3308.57	254	181	76	1.26566	0.205634	1.26566	0.205634	15	14	0.217176		246	189	84	0.916515	0.359397	0.916515	0.359397	15	14	0.376588		253	182	77	1.22202	0.221701	1.22202	0.221701	15	14	0.234007		274	161	56	2.13854	0.0324741	2.13854	0.0324741	15	14	0.0327702		236	199	94	0.480079
3024.38	3306.46	254	181	76	1.26566	0.205634	1.26566	0.205634	15	14	0.217176		244	191	86	0.829228	0.406976	0.829228	0.406976	15	14	0.425262		251	184	79	1.13473	0.256488	1.13473	0.256488	15	14	0.270299		271	164	59	2.0076	0.0446862	2.0076	0.0446862	15	14	0.045875		232	203	98	0.305505
3026.31	3304.35	254	181	76	1.26566	0.205634	1.26566	0.205634	15	14	0.217176		240	195	90	0.654654	0.512691	0.654654	0.512691	15	14	0.532545		248	187	82	1.0038	0.315475	1.0038	0.315475	15	14	0.331405		270	165	60	1.96396	0.0495355	1.96396	0.0495355	15	14	0.0510899		234	201	96	0.392792
3028.24	3302.25	256	179	74	1.35295	0.176072	1.35295	0.176072	15	14	0.186083		240	195	90	0.654654	0.512691	0.654654	0.512691	15	14	0.532545		247	188	83	0.960159	0.336976	0.960159	0.336976	15	14	0.353554		270	165	60	1.96396	0.0495355	1.96396	0.0495355	15	14	0.0510899		233	202	97	0.349149
3030.17	3300.14	256	179	74	1.35295	0.176072	1.35295	0.176072	15	14	0.186083		238	197	92	0.567367	0.570466	0.567367	0.570466	15	14	0.590745		244	191	86	0.829228	0.406976	0.829228	0.406976	15	14	0.425262		267	168	63	1.83303	0.066799	1.83303	0.066799	15	14	0.0696586		231	204	99	0.261861
3032.1	3298.05	259	176	71	1.48388	0.137841	1.48388	0.137841	15	14	0.145619		238	197	92	0.567367	0.570466	0.567367	0.570466	15	14	0.590745		243	192	87	0.785584	0.432112	0.785584	0.432112	15	14	0.450872		266	169	64	1.78939	0.0735535	1.78939	0.0735535	15	14	0.076919		230	205	100	0.218218
3034.03	3295.95	259	176	71	1.48388	0.137841	1.48388	0.137841	15	14	0.145619		243	192	87	0.785584	0.432112	0.785584	0.432112	15	14	0.450872		244	191	86	0.829228	0.406976	0.829228	0.406976	15	14	0.425262		267	168	63	1.83303	0.066799	1.83303	0.066799	15	14	0.0696586		230	205	100	0.218218
3035.96	3293.85	259	176	71	1.48388	0.137841	1.48388	0.137841	15	14	0.145619		243	192	87	0.785584	0.432112	0.785584	0.432112	15	14	0.450872		245	190	85	0.872872	0.382734	0.872872	0.382734	15	14	0.400494		266	169	64	1.78939	0.0735535	1.78939	0.0735535	15	14	0.076919		228	207	102	0.130931
3037.89	3291.76	257	178	73	1.39659	0.162537	1.39659	0.162537	15	14	0.171789		241	194	89	0.698297	0.484992	0.698297	0.484992	15	14	0.504539		247	188	83	0.960159	0.336976	0.960159	0.336976	15	14	0.353554		264	171	66	1.7021	0.0887377	1.7021	0.0887377	15	14	0.0932157		228	207	102	0.130931
3039.81	3289.67	254	181	76	1.26566	0.205634	1.26566	0.205634	15	14	0.217176		242	193	88	0.741941	0.458124	0.741941	0.458124	15	14	0.477307		246	189	84	0.916515	0.359397	0.916515	0.359397	15	14	0.376588		266	169	64	1.78939	0.0735535	1.78939	0.0735535	15	14	0.076919		227	208	103	0.0872872
3041.74	3287.59	252	183	78	1.17838	0.238647	1.17838	0.238647	15	14	0.251712		240	195	90	0.654654	0.512691	0.654654	0.512691	15	14	0.532545		242	193	88	0.741941	0.458124	0.741941	0.458124	15	14	0.477307		264	171	66	1.7021	0.0887377	1.7021	0.0887377	15	14	0.0932157		227	208	103	0.0872872
3043.67	3285.51	252	183	78	1.17838	0.238647	1.17838	0.238647	15	14	0.251712		241	194	89	0.698297	0.484992	0.698297	0.484992	15	14	0.504539		241	194	89	0.698297	0.484992	0.698297	0.484992	15	14	0.504539		263	172	67	1.65846	0.0972264	1.65846	0.0972264	15	14	0.102309		225	210	105	0
3045.6	3283.42	254	181	76	1.26566	0.205634	1.26566	0.205634	15	14	0.217176		241	194	89	0.698297	0.484992	0.698297	0.484992	15	14	0.504539		239	196	91	0.61101	0.541193	0.61101	0.541193	15	14	0.561291		264	171	66	1.7021	0.0887377	1.7021	0.0887377	15	14	0.0932157		223	212	103	-0.0872872
3047.53	3281.35	254	181	76	1.26566	0.205634	1.26566	0.205634	15	14	0.217176		240	195	90	0.654654	0.512691	0.654654	0.512691	15	14	0.532545		242	193	88	0.741941	0.458124	0.741941	0.458124	15	14	0.477307		264	171	66	1.7021	0.0887377	1.7021	0.0887377	15	14	0.0932157		223	212	103	-0.0872872
3049.46	3279.27	255	180	75	1.30931	0.190431	1.30931	0.190431	15	14	0.201205		241	194	89	0.698297	0.484992	0.698297	0.484992	15	14	0.504539		244	191	86	0.829228	0.406976	0.829228	0.406976	15	14	0.425262		265	170	65	1.74574	0.0808565	1.74574	0.0808565	15	14	0.0847612		223	212	103	-0.0872872
3051.39	3277.2	256	179	74	1.35295	0.176072	1.35295	0.176072	15	14	0.186083		241	194	89	0.698297	0.484992	0.698297	0.484992	15	14	0.504539		244	191	86	0.829228	0.406976	0.829228	0.406976	15	14	0.425262		263	172	67	1.65846	0.0972264	1.65846	0.0972264	15	14	0.102309		224	211	104	-0.0436436
3053.32	3275.13	254	181	76	1.26566	0.205634	1.26566	0.205634	15	14	0.217176		241	194	89	0.698297	0.484992	0.698297	0.484992	15	14	0.504539		243	192	87	0.785584	0.432112	0.785584	0.432112	15	14	0.450872		262	173	68	1.61481	0.106352	1.61481	0.106352	15	14	0.11207		222	213	102	-0.130931
3055.24	3273.06	253	182	77	1.22202	0.221701	1.22202	0.221701	15	14	0.234007		242	193	88	0.741941	0.458124	0.741941	0.458124	15	14	0.477307		241	194	89	0.698297	0.484992	0.698297	0.484992	15	14	0.504539		261	174	69	1.57117	0.116144	1.57117	0.116144	15	14	0.122524		219	216	99	-0.261861
3057.17	3271	253	182	77	1.22202	0.221701	1.22202	0.221701	15	14	0.234007		241	194	89	0.698297	0.484992	0.698297	0.484992	15	14	0.504539		236	199	94	0.480079	0.631171	0.480079	0.631171	15	14	0.651619		259	176	71	1.48388	0.137841	1.48388	0.137841	15	14	0.145619		219	216	99	-0.261861
3059.1	3268.93	250	185	80	1.09109	0.275234	1.09109	0.275234	15	14	0.289776		238	197	92	0.567367	0.570466	0.567367	0.570466	15	14	0.590745		234	201	96	0.392792	0.694473	0.392792	0.694473	15	14	0.71483		256	179	74	1.35295	0.176072	1.35295	0.176072	15	14	0.186083		216	219	96	-0.392792
3061.03	3266.87	244	191	86	0.829228	0.406976	0.829228	0.406976	15	14	0.425262		233	202	97	0.349149	0.726978	0.349149	0.726978	15	14	0.747192		233	202	97	0.349149	0.726978	0.349149	0.726978	15	14	0.747192		250	185	80	1.09109	0.275234	1.09109	0.275234	15	14	0.289776		210	225	90	-0.654654
3062.96	3264.82	245	190	85	0.872872	0.382734	0.872872	0.382734	15	14	0.400494		232	203	98	0.305505	0.759982	0.305505	0.759982	15	14	0.779995		231	204	99	0.261861	0.793428	0.261861	0.793428	15	14	0.813179		248	187	82	1.0038	0.315475	1.0038	0.315475	15	14	0.331405		208	227	88	-0.741941
3064.89	3262.76	247	188	83	0.960159	0.336976	0.960159	0.336976	15	14	0.353554		216	219	96	-0.392792	0.694473	-0.392792	0.694473	15	14	0.71483		214	221	94	-0.480079	0.631171	-0.480079	0.631171	15	14	0.651619		243	192	87	0.785584	0.432112	0.785584	0.432112	15	14	0.450872		202	233	82	-1.0038
3066.82	3260.71	244	191	86	0.829228	0.406976	0.829228	0.406976	15	14	0.425262		215	220	95	-0.436436	0.662521	-0.436436	0.662521	15	14	0.682954		212	223	92	-0.567367	0.570466	-0.567367	0.570466	15	14	0.590745		238	197	92	0.567367	0.570466	0.567367	0.570466	15	14	0.590745		205	230	85	-0.872872
3068.75	3258.66	239	196	91	0.61101	0.541193	0.61101	0.541193	15	14	0.561291		220	215	100	-0.218218	0.827259	-0.218218	0.827259	15	14	0.846694		211	224	91	-0.61101	0.541193	-0.61101	0.541193	15	14	0.561291		238	197	92	0.567367	0.570466	0.567367	0.570466	15	14	0.590745		197	238	77	-1.22202
3070.68	3256.61	235	200	95	0.436436	0.662521	0.436436	0.662521	15	14	0.682954		219	216	99	-0.261861	0.793428	-0.261861	0.793428	15	14	0.813179		211	224	91	-0.61101	0.541193	-0.61101	0.541193	15	14	0.561291		233	202	97	0.349149	0.726978	0.349149	0.726978	15	14	0.747192		183	252	63	-1.83303
3072.6	3254.57	232	203	98	0.305505	0.759982	0.305505	0.759982	15	14	0.779995		223	212	103	-0.0872872	0.930443	-0.0872872	0.930443	15	14	0.948623		214	221	94	-0.480079	0.631171	-0.480079	0.631171	15	14	0.651619		227	208	103	0.0872872	0.930443	0.0872872	0.930443	15	14	0.948623		188	247	68	-1.61481
3074.53	3252.53	234	201	96	0.392792	0.694473	0.392792	0.694473	15	14	0.71483		218	217	98	-0.305505	0.759982	-0.305505	0.759982	15	14	0.779995		212	223	92	-0.567367	0.570466	-0.567367	0.570466	15	14	0.590745		230	205	100	0.218218	0.827259	0.218218	0.827259	15	14	0.846694		193	242	73	-1.39659
3076.46	3250.49	233	202	97	0.349149	0.726978	0.349149	0.726978	15	14	0.747192		218	217	98	-0.305505	0.759982	-0.305505	0.759982	15	14	0.779995		215	220	95	-0.436436	0.662521	-0.436436	0.662521	15	14	0.682954		228	207	102	0.130931	0.89583	0.130931	0.89583	15	14	0.914475		196	239	76	-1.26566
3078.39	3248.45	237	198	93	0.523723	0.600472	0.523723	0.600472	15	14	0.620867		219	216	99	-0.261861	0.793428	-0.261861	0.793428	15	14	0.813179		219	216	99	-0.261861	0.793428	-0.261861	0.793428	15	14	0.813179		230	205	100	0.218218	0.827259	0.218218	0.827259	15	14	0.846694		194	241	74	-1.35295
3080.32	3246.42	234	201	96	0.392792	0.694473	0.392792	0.694473	15	14	0.71483		222	213	102	-0.130931	0.89583	-0.130931	0.89583	15	14	0.914475		225	210	105	0	1	0	1	15	14	1.01714		231	204	99	0.261861	0.793428	0.261861	0.793428	15	14	0.813179		198	237	78	-1.17838
3082.25	3244.39	226	209	104	0.0436436	0.965189	0.0436436	0.965189	15	14	0.982865		221	214	101	-0.174574	0.861414	-0.174574	0.861414	15	14	0.880478		224	211	104	-0.0436436	0.965189	-0.0436436	0.965189	15	14	0.982865		224	211	104	-0.0436436	0.965189	-0.0436436	0.965189	15	14	0.982865		195	240	75	-1.30931
3084.18	3242.36	224	211	104	-0.0436436	0.965189	-0.0436436	0.965189	15	14	0.982865		222	213	102	-0.130931	0.89583	-0.130931	0.89583	15	14	0.914475		225	210	105	0	1	0	1	15	14	1.01714		219	216	99	-0.261861	0.793428	-0.261861	0.793428	15	14	0.813179		196	239	76	-1.26566
3086.11	3240.33	227	208	103	0.0872872	0.930443	0.0872872	0.930443	15	14	0.948623		225	210	105	0	1	0	1	15	14	1.01714		230	205	100	0.218218	0.827259	0.218218	0.827259	15	14	0.846694		218	217	98	-0.305505	0.759982	-0.305505	0.759982	15	14	0.779995		204	231	84	-0.916515
3088.03	3238.31	221	214	101	-0.174574	0.861414	-0.174574	0.861414	15	14	0.880478		226	209	104	0.0436436	0.965189	0.0436436	0.965189	15	14	0.982865		231	204	99	0.261861	0.793428	0.261861	0.793428	15	14	0.813179		218	217	98	-0.305505	0.759982	-0.305505	0.759982	15	14	0.779995		203	232	83	-0.960159
3089.96	3236.28	222	213	102	-0.130931	0.89583	-0.130931	0.89583	15	14	0.914475		222	213	102	-0.130931	0.89583	-0.130931	0.89583	15	14	0.914475		227	208	103	0.0872872	0.930443	0.0872872	0.930443	15	14	0.948623		220	215	100	-0.218218	0.827259	-0.218218	0.827259	15	14	0.846694		202	233	82	-1.0038
3091.89	3234.27	223	212	103	-0.0872872	0.930443	-0.0872872	0.930443	15	14	0.948623		218	217	98	-0.305505	0.759982	-0.305505	0.759982	15	14	0.779995		227	208	103	0.0872872	0.930443	0.0872872	0.930443	15	14	0.948623		215	220	95	-0.436436	0.662521	-0.436436	0.662521	15	14	0.682954		201	234	81	-1.04745
3093.82	3232.25	221	214	101	-0.174574	0.861414	-0.174574	0.861414	15	14	0.880478		216	219	96	-0.392792	0.694473	-0.392792	0.694473	15	14	0.71483		221	214	101	-0.174574	0.861414	-0.174574	0.861414	15	14	0.880478		214	221	94	-0.480079	0.631171	-0.480079	0.631171	15	14	0.651619		199	236	79	-1.13473
3095.75	3230.24	218	217	98	-0.305505	0.759982	-0.305505	0.759982	15	14	0.779995		215	220	95	-0.436436	0.662521	-0.436436	0.662521	15	14	0.682954		220	215	100	-0.218218	0.827259	-0.218218	0.827259	15	14	0.846694		211	224	91	-0.61101	0.541193	-0.61101	0.541193	15	14	0.561291		199	236	79	-1.13473
3097.68	3228.22	221	214	101	-0.174574	0.861414	-0.174574	0.861414	15	14	0.880478		218	217	98	-0.305505	0.759982	-0.305505	0.759982	15	14	0.779995		220	215	100	-0.218218	0.827259	-0.218218	0.827259	15	14	0.846694		215	220	95	-0.436436	0.662521	-0.436436	0.662521	15	14	0.682954		195	240	75	-1.30931
3099.61	3226.22	221	214	101	-0.174574	0.861414	-0.174574	0.861414	15	14	0.880478		217	218	97	-0.349149	0.726978	-0.349149	0.726978	15	14	0.747192		224	211	104	-0.0436436	0.965189	-0.0436436	0.965189	15	14	0.982865		214	221	94	-0.480079	0.631171	-0.480079	0.631171	15	14	0.651619		195	240	75	-1.30931
3101.54	3224.21	222	213	102	-0.130931	0.89583	-0.130931	0.89583	15	14	0.914475		217	218	97	-0.349149	0.726978	-0.349149	0.726978	15	14	0.747192		227	208	103	0.0872872	0.930443	0.0872872	0.930443	15	14	0.948623		214	221	94	-0.480079	0.631171	-0.480079	0.631171	15	14	0.651619		196	239	76	-1.26566
3103.46	3222.2	226	209	104	0.0436436	0.965189	0.0436436	0.965189	15	14	0.982865		221	214	101	-0.174574	0.861414	-0.174574	0.861414	15	14	0.880478		231	204	99	0.261861	0.793428	0.261861	0.793428	15	14	0.813179		219	216	99	-0.261861	0.793428	-0.261861	0.793428	15	14	0.813179		204	231	84	-0.916515
3105.39	3220.2	219	216	99	-0.261861	0.793428	-0.261861	0.793428	15	14	0.813179		223	212	103	-0.0872872	0.930443	-0.0872872	0.930443	15	14	0.948623		229	206	101	0.174574	0.861414	0.174574	0.861414	15	14	0.880478		218	217	98	-0.305505	0.759982	-0.305505	0.759982	15	14	0.779995		202	233	82	-1.0038
3107.32	3218.2	217	218	97	-0.349149	0.726978	-0.349149	0.726978	15	14	0.747192		221	214	101	-0.174574	0.861414	-0.174574	0.861414	15	14	0.880478		230	205	100	0.218218	0.827259	0.218218	0.827259	15	14	0.846694		216	219	96	-0.392792	0.694473	-0.392792	0.694473	15	14	0.71483		201	234	81	-1.04745
3109.25	3216.21	217	218	97	-0.349149	0.726978	-0.349149	0.726978	15	14	0.747192		220	215	100	-0.218218	0.827259	-0.218218	0.827259	15	14	0.846694		229	206	101	0.174574	0.861414	0.174574	0.861414	15	14	0.880478		214	221	94	-0.480079	0.631171	-0.480079	0.631171	15	14	0.651619		198	237	78	-1.17838
3111.18	3214.21	221	214	101	-0.174574	0.861414	-0.174574	0.861414	15	14	0.880478		219	216	99	-0.261861	0.793428	-0.261861	0.793428	15	14	0.813179		231	204	99	0.261861	0.793428	0.261861	0.793428	15	14	0.813179		213	222	93	-0.523723	0.600472	-0.523723	0.600472	15	14	0.620867		200	235	80	-1.09109
3113.11	3212.22	221	214	101	-0.174574	0.861414	-0.174574	0.861414	15	14	0.880478		220	215	100	-0.218218	0.827259	-0.218218	0.827259	15	14	0.846694		227	208	103	0.0872872	0.930443	0.0872872	0.930443	15	14	0.948623		211	224	91	-0.61101	0.541193	-0.61101	0.541193	15	14	0.561291		202	233	82	-1.0038
3115.04	3210.23	221	214	101	-0.174574	0.861414	-0.174574	0.861414	15	14	0.880478		218	217	98	-0.305505	0.759982	-0.305505	0.759982	15	14	0.779995		227	208	103	0.0872872	0.930443	0.0872872	0.930443	15	14	0.948623		212	223	92	-0.567367	0.570466	-0.567367	0.570466	15	14	0.590745		200	235	80	-1.09109
3116.97	3208.25	217	218	97	-0.349149	0.726978	-0.349149	0.726978	15	14	0.747192		222	213	102	-0.130931	0.89583	-0.130931	0.89583	15	14	0.914475		224	211	104	-0.0436436	0.965189	-0.0436436	0.965189	15	14	0.982865		216	219	96	-0.392792	0.694473	-0.392792	0.694473	15	14	0.71483		202	233	82	-1.0038
3118.9	3206.26	222	213	102	-0.130931	0.89583	-0.130931	0.89583	15	14	0.914475		218	217	98	-0.305505	0.759982	-0.305505	0.759982	15	14	0.779995		228	207	102	0.130931	0.89583	0.130931	0.89583	15	14	0.914475		217	218	97	-0.349149	0.726978	-0.349149	0.726978	15	14	0.747192		205	230	85	-0.872872
3120.82	3204.28	223	212	103	-0.0872872	0.930443	-0.0872872	0.930443	15	14	0.948623		220	215	100	-0.218218	0.827259	-0.218218	0.827259	15	14	0.846694		232	203	98	0.305505	0.759982	0.305505	0.759982	15	14	0.779995		210	225	90	-0.654654	0.512691	-0.654654	0.512691	15	14	0.532545		199	236	79	-1.13473
3122.75	3202.3	216	219	96	-0.392792	0.694473	-0.392792	0.694473	15	14	0.71483		223	212	103	-0.0872872	0.930443	-0.0872872	0.930443	15	14	0.948623		233	202	97	0.349149	0.726978	0.349149	0.726978	15	14	0.747192		209	226	89	-0.698297	0.484992	-0.698297	0.484992	15	14	0.504539		199	236	79	-1.13473
3124.68	3200.33	215	220	95	-0.436436	0.662521	-0.436436	0.662521	15	14	0.682954		219	216	99	-0.261861	0.793428	-0.261861	0.793428	15	14	0.813179		230	205	100	0.218218	0.827259	0.218218	0.827259	15	14	0.846694		212	223	92	-0.567367	0.570466	-0.567367	0.570466	15	14	0.590745		199	236	79	-1.13473
3126.61	3198.35	225	210	105	0	1	0	1	15	14	1.01714		221	214	101	-0.174574	0.861414	-0.174574	0.861414	15	14	0.880478		230	205	100	0.218218	0.827259	0.218218	0.827259	15	14	0.846694		214	221	94	-0.480079	0.631171	-0.480079	0.631171	15	14	0.651619		202	233	82	-1.0038
3128.54	3196.38	222	213	102	-0.130931	0.89583	-0.130931	0.89583	15	14	0.914475		223	212	103	-0.0872872	0.930443	-0.0872872	0.930443	15	14	0.948623		227	208	103	0.0872872	0.930443	0.0872872	0.930443	15	14	0.948623		217	218	97	-0.349149	0.726978	-0.349149	0.726978	15	14	0.747192		202	233	82	-1.0038
3130.47	3194.41	220	215	100	-0.218218	0.827259	-0.218218	0.827259	15	14	0.846694		219	216	99	-0.261861	0.793428	-0.261861	0.793428	15	14	0.813179		228	207	102	0.130931	0.89583	0.130931	0.89583	15	14	0.914475		216	219	96	-0.392792	0.694473	-0.392792	0.694473	15	14	0.71483		201	234	81	-1.04745
3132.4	3192.44	223	212	103	-0.0872872	0.930443	-0.0872872	0.930443	15	14	0.948623		222	213	102	-0.130931	0.89583	-0.130931	0.89583	15	14	0.914475		228	207	102	0.130931	0.89583	0.130931	0.89583	15	14	0.914475		214	221	94	-0.480079	0.631171	-0.480079	0.631171	15	14	0.651619		202	233	82	-1.0038
3134.33	3190.48	221	214	101	-0.174574	0.861414	-0.174574	0.861414	15	14	0.880478		226	209	104	0.0436436	0.965189	0.0436436	0.965189	15	14	0.982865		230	205	100	0.218218	0.827259	0.218218	0.827259	15	14	0.846694		214	221	94	-0.480079	0.631171	-0.480079	0.631171	15	14	0.651619		202	233	82	-1.0038
3136.25	3188.52	224	211	104	-0.0436436	0.965189	-0.0436436	0.965189	15	14	0.982865		229	206	101	0.174574	0.861414	0.174596	0.861397	15	14	0.880478		236	199	94	0.480079	0.631171	0.480079	0.631171	15	14	0.651619		211	224	91	-0.61101	0.541193	-0.61101	0.541193	15	14	0.561291		200	235	80	-1.09109
3138.18	3186.56	224	211	104	-0.0436436	0.965189	-0.0436436	0.965189	15	14	0.982865		224	211	104	-0.0436436	0.965189	-0.0436436	0.965189	15	14	0.982865		236	199	94	0.480079	0.631171	0.480079	0.631171	15	14	0.651619		207	228	87	-0.785584	0.432112	-0.785584	0.432112	15	14	0.450872		201	234	81	-1.04745
3140.11	3184.6	221	214	101	-0.174574	0.861414	-0.174574	0.861414	15	14	0.880478		221	214	101	-0.174574	0.861414	-0.174574	0.861414	15	14	0.880478		226	209	104	0.0436436	0.965189	0.0436436	0.965189	15	14	0.982865		209	226	89	-0.698297	0.484992	-0.698297	0.484992	15	14	0.504539		203	232	83	-0.960159
3142.04	3182.64	224	211	104	-0.0436436	0.965189	-0.0436436	0.965189	15	14	0.982865		223	212	103	-0.0872872	0.930443	-0.0872872	0.930443	15	14	0.948623		229	206	101	0.174574	0.861414	0.174574	0.861414	15	14	0.880478		211	224	91	-0.61101	0.541193	-0.61101	0.541193	15	14	0.561291		207	228	87	-0.785584
3143.97	3180.69	228	207	102	0.130931	0.89583	0.130931	0.89583	15	14	0.914475		224	211	104	-0.0436436	0.965189	-0.0436436	0.965189	15	14	0.982865		231	204	99	0.261861	0.793428	0.261861	0.793428	15	14	0.813179		215	220	95	-0.436436	0.662521	-0.436436	0.662521	15	14	0.682954		206	229	86	-0.829228
3145.9	3178.74	227	208	103	0.0872872	0.930443	0.0872872	0.930443	15	14	0.948623		228	207	102	0.130931	0.89583	0.130931	0.89583	15	14	0.914475		236	199	94	0.480079	0.631171	0.480079	0.631171	15	14	0.651619		215	220	95	-0.436436	0.662521	-0.436436	0.662521	15	14	0.682954		201	234	81	-1.04745
3147.83	3176.79	224	211	104	-0.0436436	0.965189	-0.0436436	0.965189	15	14	0.982865		230	205	100	0.218218	0.827259	0.218218	0.827259	15	14	0.846694		235	200	95	0.436436	0.662521	0.436436	0.662521	15	14	0.682954		216	219	96	-0.392792	0.694473	-0.392792	0.694473	15	14	0.71483		201	234	81	-1.04745
3149.76	3174.85	225	210	105	0	1	0	1	15	14	1.01714		232	203	98	0.305505	0.759982	0.305505	0.759982	15	14	0.779995		233	202	97	0.349149	0.726978	0.349149	0.726978	15	14	0.747192		218	217	98	-0.305505	0.759982	-0.305505	0.759982	15	14	0.779995		207	228	87	-0.785584
3151.69	3172.91	227	208	103	0.0872872	0.930443	0.0872872	0.930443	15	14	0.948623		230	205	100	0.218218	0.827259	0.218218	0.827259	15	14	0.846694		231	204	99	0.261861	0.793428	0.261861	0.793428	15	14	0.813179		217	218	97	-0.349149	0.726978	-0.349149	0.726978	15	14	0.747192		210	225	90	-0.654654
3153.61	3170.96	227	208	103	0.0872872	0.930443	0.0872872	0.930443	15	14	0.948623		227	208	103	0.0872872	0.930443	0.0872872	0.930443	15	14	0.948623		232	203	98	0.305505	0.759982	0.305505	0.759982	15	14	0.779995		216	219	96	-0.392792	0.694473	-0.392792	0.694473	15	14	0.71483		205	230	85	-0.872872
3155.54	3169.03	224	211	104	-0.0436436	0.965189	-0.0436436	0.965189	15	14	0.982865		225	210	105	0	1	0	1	15	14	1.01714		227	208	103	0.0872872	0.930443	0.0872872	0.930443	15	14	0.948623		211	224	91	-0.61101	0.541193	-0.61101	0.541193	15	14	0.561291		203	232	83	-0.960159
3157.47	3167.09	221	214	101	-0.174574	0.861414	-0.174574	0.861414	15	14	0.880478		225	210	105	0	1	0	1	15	14	1.01714		226	209	104	0.0436436	0.965189	0.0436436	0.965189	15	14	0.982865		205	230	85	-0.872872	0.382734	-0.872872	0.382734	15	14	0.400494		200	235	80	-1.09109
3159.4	3165.16	225	210	105	0	1	0	1	15	14	1.01714		223	212	103	-0.0872872	0.930443	-0.0872872	0.930443	15	14	0.948623		226	209	104	0.0436436	0.965189	0.0436436	0.965189	15	14	0.982865		208	227	88	-0.741941	0.458124	-0.741941	0.458124	15	14	0.477307		206	229	86	-0.829228
3161.33	3163.23	228	207	102	0.130931	0.89583	0.130931	0.89583	15	14	0.914475		227	208	103	0.0872872	0.930443	0.0872872	0.930443	15	14	0.948623		231	204	99	0.261861	0.793428	0.261861	0.793428	15	14	0.813179		211	224	91	-0.61101	0.541193	-0.61101	0.541193	15	14	0.561291		208	227	88	-0.741941
3163.26	3161.3	230	205	100	0.218218	0.827259	0.218218	0.827259	15	14	0.846694		228	207	102	0.130931	0.89583	0.130931	0.89583	15	14	0.914475		231	204	99	0.261861	0.793428	0.261861	0.793428	15	14	0.813179		209	226	89	-0.698297	0.484992	-0.698297	0.484992	15	14	0.504539		204	231	84	-0.916515
3165.19	3159.37	225	210	105	0	1	0	1	15	14	1.01714		230	205	100	0.218218	0.827259	0.218218	0.827259	15	14	0.846694		231	204	99	0.261861	0.793428	0.261861	0.793428	15	14	0.813179		208	227	88	-0.741941	0.458124	-0.741941	0.458124	15	14	0.477307		202	233	82	-1.0038
3167.12	3157.45	226	209	104	0.0436436	0.965189	0.0436436	0.965189	15	14	0.982865		227	208	103	0.0872872	0.930443	0.0872872	0.930443	15	14	0.948623		227	208	103	0.0872872	0.930443	0.0872872	0.930443	15	14	0.948623		211	224	91	-0.61101	0.541193	-0.61101	0.541193	15	14	0.561291		203	232	83	-0.960159
3169.04	3155.53	227	208	103	0.0872872	0.930443	0.0872872	0.930443	15	14	0.948623		229	206	101	0.174574	0.861414	0.174574	0.861414	15	14	0.880478		222	213	102	-0.130931	0.89583	-0.130931	0.89583	15	14	0.914475		209	226	89	-0.698297	0.484992	-0.698297	0.484992	15	14	0.504539		206	229	86	-0.829228
3170.97	3153.61	224	211	104	-0.0436436	0.965189	-0.0436436	0.965189	15	14	0.982865		225	210	105	0	1	0	1	15	14	1.01714		221	214	101	-0.174574	0.861414	-0.174574	0.861414	15	14	0.880478		203	232	83	-0.960159	0.336976	-0.960159	0.336976	15	14	0.353554		203	232	83	-0.960159
3172.9	3151.69	224	211	104	-0.0436436	0.965189	-0.0436436	0.965189	15	14	0.982865		226	209	104	0.0436436	0.965189	0.0436436	0.965189	15	14	0.982865		228	207	102	0.130931	0.89583	0.130931	0.89583	15	14	0.914475		204	231	84	-0.916515	0.359397	-0.916515	0.359397	15	14	0.376588		201	234	81	-1.04745
3174.83	3149.77	223	212	103	-0.0872872	0.930443	-0.0872872	0.930443	15	14	0.948623		227	208	103	0.0872872	0.930443	0.0872872	0.930443	15	14	0.948623		232	203	98	0.305505	0.759982	0.305505	0.759982	15	14	0.779995		208	227	88	-0.741941	0.458124	-0.741941	0.458124	15	14	0.477307		205	230	85	-0.872872
3176.76	3147.86	225	210	105	0	1	0	1	15	14	1.01714		232	203	98	0.305505	0.759982	0.305505	0.759982	15	14	0.779995		230	205	100	0.218218	0.827259	0.218218	0.827259	15	14	0.846694		217	218	97	-0.349149	0.726978	-0.349149	0.726978	15	14	0.747192		205	230	85	-0.872872
3178.69	3145.95	225	210	105	0	1	0	1	15	14	1.01714		230	205	100	0.218218	0.827259	0.218218	0.827259	15	14	0.846694		230	205	100	0.218218	0.827259	0.218218	0.827259	15	14	0.846694		212	223	92	-0.567367	0.570466	-0.567367	0.570466	15	14	0.590745		208	227	88	-0.741941
3180.62	3144.04	224	211	104	-0.0436436	0.965189	-0.0436436	0.965189	15	14	0.982865		223	212	103	-0.0872872	0.930443	-0.0872872	0.930443	15	14	0.948623		224	211	104	-0.0436436	0.965189	-0.0436436	0.965189	15	14	0.982865		211	224	91	-0.61101	0.541193	-0.61101	0.541193	15	14	0.561291		201	234	81	-1.04745
3182.55	3142.14	222	213	102	-0.130931	0.89583	-0.130931	0.89583	15	14	0.914475		222	213	102	-0.130931	0.89583	-0.130931	0.89583	15	14	0.914475		224	211	104	-0.0436436	0.965189	-0.0436436	0.965189	15	14	0.982865		212	223	92	-0.567367	0.570466	-0.567367	0.570466	15	14	0.590745		206	229	86	-0.829228
3184.48	3140.23	227	208	103	0.0872872	0.930443	0.0872872	0.930443	15	14	0.948623		222	213	102	-0.130931	0.89583	-0.130931	0.89583	15	14	0.914475		224	211	104	-0.0436436	0.965189	-0.0436436	0.965189	15	14	0.982865		206	229	86	-0.829228	0.406976	-0.829228	0.406976	15	14	0.425262		200	235	80	-1.09109
3186.4	3138.33	227	208	103	0.0872872	0.930443	0.0872872	0.930443	15	14	0.948623		219	216	99	-0.261861	0.793428	-0.261861	0.793428	15	14	0.813179		216	219	96	-0.392792	0.694473	-0.392792	0.694473	15	14	0.71483		200	235	80	-1.09109	0.275234	-1.09109	0.275234	15	14	0.289776		203	232	83	-0.960159
3188.33	3136.44	226	209	104	0.0436436	0.965189	0.0436436	0.965189	15	14	0.982865		220	215	100	-0.218218	0.827259	-0.218218	0.827259	15	14	0.846694		218	217	98	-0.305505	0.759982	-0.305505	0.759982	15	14	0.779995		204	231	84	-0.916515	0.359397	-0.916515	0.359397	15	14	0.376588		204	231	84	-0.916515
3190.26	3134.54	228	207	102	0.130931	0.89583	0.130931	0.89583	15	14	0.914475		222	213	102	-0.130931	0.89583	-0.130931	0.89583	15	14	0.914475		220	215	100	-0.218218	0.827259	-0.218218	0.827259	15	14	0.846694		203	232	83	-0.960159	0.336976	-0.960159	0.336976	15	14	0.353554		203	232	83	-0.960159
3192.19	3132.65	225	210	105	0	1	0	1	15	14	1.01714		219	216	99	-0.261861	0.793428	-0.261861	0.793428	15	14	0.813179		218	217	98	-0.305505	0.759982	-0.305505	0.759982	15	14	0.779995		199	236	79	-1.13473	0.256488	-1.13473	0.256488	15	14	0.270299		204	231	84	-0.916515
3194.12	3130.75	222	213	102	-0.130931	0.89583	-0.130931	0.89583	15	14	0.914475		219	216	99	-0.261861	0.793428	-0.261861	0.793428	15	14	0.813179		219	216	99	-0.261861	0.793428	-0.261861	0.793428	15	14	0.813179		207	228	87	-0.785584	0.432112	-0.785584	0.432112	15	14	0.450872		203	232	83	-0.960159
3196.05	3128.86	220	215	100	-0.218218	0.827259	-0.218218	0.827259	15	14	0.846694		219	216	99	-0.261861	0.793428	-0.261861	0.793428	15	14	0.813179		219	216	99	-0.261861	0.793428	-0.261861	0.793428	15	14	0.813179		206	229	86	-0.829228	0.406976	-0.829228	0.406976	15	14	0.425262		204	231	84	-0.916515
3197.98	3126.98	223	212	103	-0.0872872	0.930443	-0.0872872	0.930443	15	14	0.948623		214	221	94	-0.480079	0.631171	-0.480079	0.631171	15	14	0.651619		216	219	96	-0.392792	0.694473	-0.392792	0.694473	15	14	0.71483		202	233	82	-1.0038	0.315475	-1.0038	0.315475	15	14	0.331405		200	235	80	-1.09109
3199.91	3125.09	226	209	104	0.0436436	0.965189	0.0436436	0.965189	15	14	0.982865		213	222	93	-0.523723	0.600472	-0.523723	0.600472	15	14	0.620867		215	220	95	-0.436436	0.662521	-0.436436	0.662521	15	14	0.682954		205	230	85	-0.872872	0.382734	-0.872872	0.382734	15	14	0.400494		204	231	84	-0.916515
3201.83	3123.21	227	208	103	0.0872872	0.930443	0.0872872	0.930443	15	14	0.948623		219	216	99	-0.261861	0.793428	-0.261861	0.793428	15	14	0.813179		214	221	94	-0.480079	0.631171	-0.480079	0.631171	15	14	0.651619		205	230	85	-0.872872	0.382734	-0.872872	0.382734	15	14	0.400494		209	226	89	-0.698297
3203.76	3121.33	228	207	102	0.130931	0.89583	0.130931	0.89583	15	14	0.914475		219	216	99	-0.261861	0.793428	-0.261861	0.793428	15	14	0.813179		218	217	98	-0.305505	0.759982	-0.305505	0.759982	15	14	0.779995		212	223	92	-0.567367	0.570466	-0.567367	0.570466	15	14	0.590745		213	222	93	-0.523723
3205.69	3119.45	226	209	104	0.0436436	0.965189	0.0436436	0.965189	15	14	0.982865		219	216	99	-0.261861	0.793428	-0.261861	0.793428	15	14	0.813179		218	217	98	-0.305505	0.759982	-0.305505	0.759982	15	14	0.779995		212	223	92	-0.567367	0.570466	-0.567367	0.570466	15	14	0.590745		208	227	88	-0.741941
3207.62	3117.58	224	211	104	-0.0436436	0.965189	-0.0436436	0.965189	15	14	0.982865		216	219	96	-0.392792	0.694473	-0.392792	0.694473	15	14	0.71483		211	224	91	-0.61101	0.541193	-0.61101	0.541193	15	14	0.561291		208	227	88	-0.741941	0.458124	-0.741941	0.458124	15	14	0.477307		210	225	90	-0.654654
3209.55	3115.7	225	210	105	0	1	0	1	15	14	1.01714		220	215	100	-0.218218	0.827259	-0.218218	0.827259	15	14	0.846694		215	220	95	-0.436436	0.662521	-0.436436	0.662521	15	14	0.682954		210	225	90	-0.654654	0.512691	-0.654654	0.512691	15	14	0.532545		210	225	90	-0.654654
3211.48	3113.83	221	214	101	-0.174574	0.861414	-0.174574	0.861414	15	14	0.880478		218	217	98	-0.305505	0.759982	-0.305505	0.759982	15	14	0.779995		215	220	95	-0.436436	0.662521	-0.436436	0.662521	15	14	0.682954		212	223	92	-0.567367	0.570466	-0.567367	0.570466	15	14	0.590745		206	229	86	-0.829228
3213.41	3111.96	225	210	105	0	1	0	1	15	14	1.01714		219	216	99	-0.261861	0.793428	-0.261861	0.793428	15	14	0.813179		212	223	92	-0.567367	0.570466	-0.567367	0.570466	15	14	0.590745		209	226	89	-0.698297	0.484992	-0.698297	0.484992	15	14	0.504539		206	229	86	-0.829228
3215.34	3110.09	228	207	102	0.130931	0.89583	0.130931	0.89583	15	14	0.914475		215	220	95	-0.436436	0.662521	-0.436436	0.662521	15	14	0.682954		214	221	94	-0.480079	0.631171	-0.480079	0.631171	15	14	0.651619		209	226	89	-0.698297	0.484992	-0.698297	0.484992	15	14	0.504539		206	229	86	-0.829228
3217.27	3108.23	226	209	104	0.0436436	0.965189	0.0436436	0.965189	15	14	0.982865		214	221	94	-0.480079	0.631171	-0.480079	0.631171	15	14	0.651619		217	218	97	-0.349149	0.726978	-0.349149	0.726978	15	14	0.747192		205	230	85	-0.872872	0.382734	-0.872872	0.382734	15	14	0.400494		204	231	84	-0.916515
3219.19	3106.37	225	210	105	0	1	0	1	15	14	1.01714		214	221	94	-0.480079	0.631171	-0.480079	0.631171	15	14	0.651619		214	221	94	-0.480079	0.631171	-0.480079	0.631171	15	14	0.651619		206	229	86	-0.829228	0.406976	-0.829228	0.406976	15	14	0.425262		209	226	89	-0.698297
3221.12	3104.51	233	202	97	0.349149	0.726978	0.349149	0.726978	15	14	0.747192		223	212	103	-0.0872872	0.930443	-0.0872872	0.930443	15	14	0.948623		216	219	96	-0.392792	0.694473	-0.392792	0.694473	15	14	0.71483		207	228	87	-0.785584	0.432112	-0.785584	0.432112	15	14	0.450872		207	228	87	-0.785584
3223.05	3102.65	230	205	100	0.218218	0.827259	0.218218	0.827259	15	14	0.846694		220	215	100	-0.218218	0.827259	-0.218218	0.827259	15	14	0.846694		215	220	95	-0.436436	0.662521	-0.436436	0.662521	15	14	0.682954		201	234	81	-1.04745	0.294895	-1.04745	0.294895	15	14	0.310143		208	227	88	-0.741941
3224.98	3100.79	223	212	103	-0.0872872	0.930443	-0.0872872	0.930443	15	14	0.948623		217	218	97	-0.349149	0.726978	-0.349149	0.726978	15	14	0.747192		213	222	93	-0.523723	0.600472	-0.523723	0.600472	15	14	0.620867		201	234	81	-1.04745	0.294895	-1.04745	0.294895	15	14	0.310143		205	230	85	-0.872872
3226.91	3098.94	225	210	105	0	1	0	1	15	14	1.01714		215	220	95	-0.436436	0.662521	-0.436436	0.662521	15	14	0.682954		216	219	96	-0.392792	0.694473	-0.392792	0.694473	15	14	0.71483		207	228	87	-0.785584	0.432112	-0.785584	0.432112	15	14	0.450872		207	228	87	-0.785584
3228.84	3097.09	225	210	105	0	1	0	1	15	14	1.01714		215	220	95	-0.436436	0.662521	-0.436436	0.662521	15	14	0.682954		213	222	93	-0.523723	0.600472	-0.523723	0.600472	15	14	0.620867		206	229	86	-0.829228	0.406976	-0.829228	0.406976	15	14	0.425262		203	232	83	-0.960159
3230.77	3095.24	219	216	99	-0.261861	0.793428	-0.261861	0.793428	15	14	0.813179		217	218	97	-0.349149	0.726978	-0.349149	0.726978	15	14	0.747192		213	222	93	-0.523723	0.600472	-0.523723	0.600472	15	14	0.620867		203	232	83	-0.960159	0.336976	-0.960159	0.336976	15	14	0.353554		201	234	81	-1.04745
3232.7	3093.39	219	216	99	-0.261861	0.793428	-0.261861	0.793428	15	14	0.813179		216	219	96	-0.392792	0.694473	-0.392792	0.694473	15	14	0.71483		212	223	92	-0.567367	0.570466	-0.567367	0.570466	15	14	0.590745		202	233	82	-1.0038	0.315475	-1.0038	0.315475	15	14	0.331405		201	234	81	-1.04745
3234.62	3091.55	223	212	103	-0.0872872	0.930443	-0.0872872	0.930443	15	14	0.948623		206	229	86	-0.829228	0.406976	-0.829228	0.406976	15	14	0.425262		210	225	90	-0.654654	0.512691	-0.654654	0.512691	15	14	0.532545		196	239	76	-1.26566	0.205634	-1.26566	0.205634	15	14	0.217176		198	237	78	-1.17838
3236.55	3089.71	227	208	103	0.0872872	0.930443	0.0872872	0.930443	15	14	0.948623		208	227	88	-0.741941	0.458124	-0.741941	0.458124	15	14	0.477307		211	224	91	-0.61101	0.541193	-0.61101	0.541193	15	14	0.561291		202	233	82	-1.0038	0.315475	-1.0038	0.315475	15	14	0.331405		200	235	80	-1.09109
3238.48	3087.87	231	204	99	0.261861	0.793428	0.261861	0.793428	15	14	0.813179		210	225	90	-0.654654	0.512691	-0.654654	0.512691	15	14	0.532545		213	222	93	-0.523723	0.600472	-0.523723	0.600472	15	14	0.620867		201	234	81	-1.04745	0.294895	-1.04745	0.294895	15	14	0.310143		206	229	86	-0.829228
3240.41	3086.03	229	206	101	0.174574	0.861414	0.174574	0.861414	15	14	0.880478		209	226	89	-0.698297	0.484992	-0.698297	0.484992	15	14	0.504539		213	222	93	-0.523723	0.600472	-0.523723	0.600472	15	14	0.620867		206	229	86	-0.829228	0.406976	-0.829228	0.406976	15	14	0.425262		201	234	81	-1.04745
3242.34	3084.19	226	209	104	0.0436436	0.965189	0.0436436	0.965189	15	14	0.982865		209	226	89	-0.698297	0.484992	-0.698297	0.484992	15	14	0.504539		210	225	90	-0.654654	0.512691	-0.654654	0.512691	15	14	0.532545		200	235	80	-1.09109	0.275234	-1.09109	0.275234	15	14	0.289776		199	236	79	-1.13473
3244.27	3082.36	226	209	104	0.0436436	0.965189	0.0436436	0.965189	15	14	0.982865		213	222	93	-0.523723	0.600472	-0.523723	0.600472	15	14	0.620867		212	223	92	-0.567367	0.570466	-0.567367	0.570466	15	14	0.590745		210	225	90	-0.654654	0.512691	-0.654654	0.512691	15	14	0.532545		199	236	79	-1.13473
3246.2	3080.53	225	210	105	0	1	0	1	15	14	1.01714		216	219	96	-0.392792	0.694473	-0.392792	0.694473	15	14	0.71483		215	220	95	-0.436436	0.662521	-0.436436	0.662521	15	14	0.682954		212	223	92	-0.567367	0.570466	-0.567367	0.570466	15	14	0.590745		199	236	79	-1.13473
3248.13	3078.7	225	210	105	0	1	0	1	15	14	1.01714		213	222	93	-0.523723	0.600472	-0.523723	0.600472	15	14	0.620867		215	220	95	-0.436436	0.662521	-0.436436	0.662521	15	14	0.682954		212	223	92	-0.567367	0.570466	-0.567367	0.570466	15	14	0.590745		200	235	80	-1.09109
3250.05	3076.87	221	214	101	-0.174574	0.861414	-0.174574	0.861414	15	14	0.880478		215	220	95	-0.436436	0.662521	-0.436436	0.662521	15	14	0.682954		211	224	91	-0.61101	0.541193	-0.61101	0.541193	15	14	0.561291		212	223	92	-0.567367	0.570466	-0.567367	0.570466	15	14	0.590745		197	238	77	-1.22202
3251.98	3075.05	223	212	103	-0.0872872	0.930443	-0.0872872	0.930443	15	14	0.948623		209	226	89	-0.698297	0.484992	-0.698297	0.484992	15	14	0.504539		211	224	91	-0.61101	0.541193	-0.61101	0.541193	15	14	0.561291		207	228	87	-0.785584	0.432112	-0.785584	0.432112	15	14	0.450872		194	241	74	-1.35295
3253.91	3073.22	216	219	96	-0.392792	0.694473	-0.392792	0.694473	15	14	0.71483		201	234	81	-1.04745	0.294895	-1.04745	0.294895	15	14	0.310143		209	226	89	-0.698297	0.484992	-0.698297	0.484992	15	14	0.504539		200	235	80	-1.09109	0.275234	-1.09109	0.275234	15	14	0.289776		195	240	75	-1.30931
3255.84	3071.4	224	211	104	-0.0436436	0.965189	-0.0436436	0.965189	15	14	0.982865		206	229	86	-0.829228	0.406976	-0.829228	0.406976	15	14	0.425262		209	226	89	-0.698297	0.484992	-0.698297	0.484992	15	14	0.504539		201	234	81	-1.04745	0.294895	-1.04745	0.294895	15	14	0.310143		203	232	83	-0.960159
3257.77	3069.58	225	210	105	0	1	0	1	15	14	1.01714		210	225	90	-0.654654	0.512691	-0.654654	0.512691	15	14	0.532545		211	224	91	-0.61101	0.541193	-0.61101	0.541193	15	14	0.561291		209	226	89	-0.698297	0.484992	-0.698297	0.484992	15	14	0.504539		203	232	83	-0.960159
3259.7	3067.77	227	208	103	0.0872872	0.930443	0.0872872	0.930443	15	14	0.948623		213	222	93	-0.523723	0.600472	-0.523723	0.600472	15	14	0.620867		212	223	92	-0.567367	0.570466	-0.567367	0.570466	15	14	0.590745		207	228	87	-0.785584	0.432112	-0.785584	0.432112	15	14	0.450872		201	234	81	-1.04745
3261.63	3065.95	226	209	104	0.0436436	0.965189	0.0436436	0.965189	15	14	0.982865		213	222	93	-0.523723	0.600472	-0.523723	0.600472	15	14	0.620867		218	217	98	-0.305505	0.759982	-0.305505	0.759982	15	14	0.779995		211	224	91	-0.61101	0.541193	-0.61101	0.541193	15	14	0.561291		196	239	76	-1.26566
3263.56	3064.14	224	211	104	-0.0436436	0.965189	-0.0436436	0.965189	15	14	0.982865		211	224	91	-0.61101	0.541193	-0.61101	0.541193	15	14	0.561291		215	220	95	-0.436436	0.662521	-0.436436	0.662521	15	14	0.682954		205	230	85	-0.872872	0.382734	-0.872872	0.382734	15	14	0.400494		197	238	77	-1.22202
3265.49	3062.33	226	209	104	0.0436436	0.965189	0.0436436	0.965189	15	14	0.982865		210	225	90	-0.654654	0.512691	-0.654654	0.512691	15	14	0.532545		218	217	98	-0.305505	0.759982	-0.305505	0.759982	15	14	0.779995		206	229	86	-0.829228	0.406976	-0.829228	0.406976	15	14	0.425262		196	239	76	-1.26566
3267.41	3060.52	223	212	103	-0.0872872	0.930443	-0.0872872	0.930443	15	14	0.948623		211	224	91	-0.61101	0.541193	-0.61101	0.541193	15	14	0.561291		212	223	92	-0.567367	0.570466	-0.567367	0.570466	15	14	0.590745		209	226	89	-0.698297	0.484992	-0.698297	0.484992	15	14	0.504539		197	238	77	-1.22202
3269.34	3058.72	218	217	98	-0.305505	0.759982	-0.305505	0.759982	15	14	0.779995		204	231	84	-0.916515	0.359397	-0.916515	0.359397	15	14	0.376588		209	226	89	-0.698297	0.484992	-0.698297	0.484992	15	14	0.504539		206	229	86	-0.829228	0.406976	-0.829228	0.406976	15	14	0.425262		197	238	77	-1.22202
3271.27	3056.91	223	212	103	-0.0872872	0.930443	-0.0872872	0.930443	15	14	0.948623		210	225	90	-0.654654	0.512691	-0.654654	0.512691	15	14	0.532545		210	225	90	-0.654654	0.512691	-0.654654	0.512691	15	14	0.532545		210	225	90	-0.654654	0.512691	-0.654654	0.512691	15	14	0.532545		196	239	76	-1.26566
3273.2	3055.11	223	212	103	-0.0872872	0.930443	-0.0872872	0.930443	15	14	0.948623		206	229	86	-0.829228	0.406976	-0.829228	0.406976	15	14	0.425262		210	225	90	-0.654654	0.512691	-0.654654	0.512691	15	14	0.532545		212	223	92	-0.567367	0.570466	-0.567367	0.570466	15	14	0.590745		196	239	76	-1.26566
3275.13	3053.31	221	214	101	-0.174574	0.861414	-0.174574	0.861414	15	14	0.880478		210	225	90	-0.654654	0.512691	-0.654654	0.512691	15	14	0.532545		210	225	90	-0.654654	0.512691	-0.654654	0.512691	15	14	0.532545		208	227	88	-0.741941	0.458124	-0.741941	0.458124	15	14	0.477307		201	234	81	-1.04745
3277.06	3051.52	218	217	98	-0.305505	0.759982	-0.305505	0.759982	15	14	0.779995		208	227	88	-0.741941	0.458124	-0.741941	0.458124	15	14	0.477307		212	223	92	-0.567367	0.570466	-0.567367	0.570466	15	14	0.590745		205	230	85	-0.872872	0.382734	-0.872872	0.382734	15	14	0.400494		199	236	79	-1.13473
3278.99	3049.72	226	209	104	0.0436436	0.965189	0.0436436	0.965189	15	14	0.982865		213	222	93	-0.523723	0.600472	-0.523723	0.600472	15	14	0.620867		216	219	96	-0.392792	0.694473	-0.392792	0.694473	15	14	0.71483		206	229	86	-0.829228	0.406976	-0.829228	0.406976	15	14	0.425262		196	239	76	-1.26566
3280.92	3047.93	228	207	102	0.130931	0.89583	0.130931	0.89583	15	14	0.914475		211	224	91	-0.61101	0.541193	-0.61101	0.541193	15	14	0.561291		215	220	95	-0.436436	0.662521	-0.436436	0.662521	15	14	0.682954		203	232	83	-0.960159	0.336976	-0.960159	0.336976	15	14	0.353554		198	237	78	-1.17838
3282.84	3046.14	230	205	100	0.218218	0.827259	0.218218	0.827259	15	14	0.846694		215	220	95	-0.436436	0.662521	-0.436436	0.662521	15	14	0.682954		216	219	96	-0.392792	0.694473	-0.392792	0.694473	15	14	0.71483		207	228	87	-0.785584	0.432112	-0.785584	0.432112	15	14	0.450872		198	237	78	-1.17838
3284.77	3044.35	225	210	105	0	1	0	1	15	14	1.01714		214	221	94	-0.480079	0.631171	-0.480079	0.631171	15	14	0.651619		214	221	94	-0.480079	0.631171	-0.480079	0.631171	15	14	0.651619		202	233	82	-1.0038	0.315475	-1.0038	0.315475	15	14	0.331405		197	238	77	-1.22202
3286.7	3042.56	225	210	105	0	1	0	1	15	14	1.01714		211	224	91	-0.61101	0.541193	-0.61101	0.541193	15	14	0.561291		209	226	89	-0.698297	0.484992	-0.698297	0.484992	15	14	0.504539		204	231	84	-0.916515	0.359397	-0.916515	0.359397	15	14	0.376588		193	242	73	-1.39659
3288.63	3040.78	227	208	103	0.0872872	0.930443	0.0872872	0.930443	15	14	0.948623		207	228	87	-0.785584	0.432112	-0.785584	0.432112	15	14	0.450872		212	223	92	-0.567367	0.570466	-0.567367	0.570466	15	14	0.590745		206	229	86	-0.829228	0.406976	-0.829228	0.406976	15	14	0.425262		193	242	73	-1.39659
3290.56	3039	226	209	104	0.0436436	0.965189	0.0436436	0.965189	15	14	0.982865		212	223	92	-0.567367	0.570466	-0.567367	0.570466	15	14	0.590745		215	220	95	-0.436436	0.662521	-0.436436	0.662521	15	14	0.682954		214	221	94	-0.480079	0.631171	-0.480079	0.631171	15	14	0.651619		197	238	77	-1.22202
3292.49	3037.22	224	211	104	-0.0436436	0.965189	-0.0436436	0.965189	15	14	0.982865		211	224	91	-0.61101	0.541193	-0.61101	0.541193	15	14	0.561291		217	218	97	-0.349149	0.726978	-0.349149	0.726978	15	14	0.747192		213	222	93	-0.523723	0.600472	-0.523723	0.600472	15	14	0.620867		202	233	82	-1.0038
3294.42	3035.44	225	210	105	0	1	0	1	15	14	1.01714		212	223	92	-0.567367	0.570466	-0.567367	0.570466	15	14	0.590745		212	223	92	-0.567367	0.570466	-0.567367	0.570466	15	14	0.590745		210	225	90	-0.654654	0.512691	-0.654654	0.512691	15	14	0.532545		200	235	80	-1.09109
3296.35	3033.66	223	212	103	-0.0872872	0.930443	-0.0872872	0.930443	15	14	0.948623		209	226	89	-0.698297	0.484992	-0.698297	0.484992	15	14	0.504539		208	227	88	-0.741941	0.458124	-0.741941	0.458124	15	14	0.477307		203	232	83	-0.960159	0.336976	-0.960159	0.336976	15	14	0.353554		193	242	73	-1.39659
3298.28	3031.89	227	208	103	0.0872872	0.930443	0.0872872	0.930443	15	14	0.948623		212	223	92	-0.567367	0.570466	-0.567367	0.570466	15	14	0.590745		213	222	93	-0.523723	0.600472	-0.523723	0.600472	15	14	0.620867		201	234	81	-1.04745	0.294895	-1.04745	0.294895	15	14	0.310143		192	243	72	-1.44024
3300.2	3030.12	225	210	105	0	1	0	1	15	14	1.01714		212	223	92	-0.567367	0.570466	-0.567367	0.570466	15	14	0.590745		215	220	95	-0.436436	0.662521	-0.436436	0.662521	15	14	0.682954		199	236	79	-1.13473	0.256488	-1.13473	0.256488	15	14	0.270299		194	241	74	-1.35295
3302.13	3028.35	232	203	98	0.305505	0.759982	0.305505	0.759982	15	14	0.779995		213	222	93	-0.523723	0.600472	-0.523723	0.600472	15	14	0.620867		211	224	91	-0.61101	0.541193	-0.61101	0.541193	15	14	0.561291		201	234	81	-1.04745	0.294895	-1.04745	0.294895	15	14	0.310143		199	236	79	-1.13473
3304.06	3026.58	229	206	101	0.174574	0.861414	0.174574	0.861414	15	14	0.880478		209	226	89	-0.698297	0.484992	-0.698297	0.484992	15	14	0.504539		216	219	96	-0.392792	0.694473	-0.392792	0.694473	15	14	0.71483		204	231	84	-0.916515	0.359397	-0.916515	0.359397	15	14	0.376588		205	230	85	-0.872872
3305.99	3024.81	230	205	100	0.218218	0.827259	0.218218	0.827259	15	14	0.846694		208	227	88	-0.741941	0.458124	-0.741941	0.458124	15	14	0.477307		216	219	96	-0.392792	0.694473	-0.392792	0.694473	15	14	0.71483		207	228	87	-0.785584	0.432112	-0.785584	0.432112	15	14	0.450872		197	238	77	-1.22202
3307.92	3023.05	230	205	100	0.218218	0.827259	0.218218	0.827259	15	14	0.846694		211	224	91	-0.61101	0.541193	-0.61101	0.541193	15	14	0.561291		214	221	94	-0.480079	0.631171	-0.480079	0.631171	15	14	0.651619		203	232	83	-0.960159	0.336976	-0.960159	0.336976	15	14	0.353554		197	238	77	-1.22202
3309.85	3021.29	224	211	104	-0.0436436	0.965189	-0.0436436	0.965189	15	14	0.982865		214	221	94	-0.480079	0.631171	-0.480079	0.631171	15	14	0.651619		216	219	96	-0.392792	0.694473	-0.392792	0.694473	15	14	0.71483		206	229	86	-0.829228	0.406976	-0.829228	0.406976	15	14	0.425262		198	237	78	-1.17838
3311.78	3019.53	225	210	105	0	1	0	1	15	14	1.01714		209	226	89	-0.698297	0.484992	-0.698297	0.484992	15	14	0.504539		216	219	96	-0.392792	0.694473	-0.392792	0.694473	15	14	0.71483		208	227	88	-0.741941	0.458124	-0.741941	0.458124	15	14	0.477307		196	239	76	-1.26566
3313.71	3017.77	227	208	103	0.0872872	0.930443	0.0872872	0.930443	15	14	0.948623		213	222	93	-0.523723	0.600472	-0.523723	0.600472	15	14	0.620867		216	219	96	-0.392792	0.694473	-0.392792	0.694473	15	14	0.71483		207	228	87	-0.785584	0.432112	-0.785584	0.432112	15	14	0.450872		195	240	75	-1.30931
3315.63	3016.01	231	204	99	0.261861	0.793428	0.261861	0.793428	15	14	0.813179		216	219	96	-0.392792	0.694473	-0.392792	0.694473	15	14	0.71483		220	215	100	-0.218218	0.827259	-0.218218	0.827259	15	14	0.846694		209	226	89	-0.698297	0.484992	-0.698297	0.484992	15	14	0.504539		196	239	76	-1.26566
3317.56	3014.26	228	207	102	0.130931	0.89583	0.130931	0.89583	15	14	0.914475		214	221	94	-0.480079	0.631171	-0.480079	0.631171	15	14	0.651619		218	217	98	-0.305505	0.759982	-0.305505	0.759982	15	14	0.779995		209	226	89	-0.698297	0.484992	-0.698297	0.484992	15	14	0.504539		194	241	74	-1.35295
3319.49	3012.51	220	215	100	-0.218218	0.827259	-0.218218	0.827259	15	14	0.846694		214	221	94	-0.480079	0.631171	-0.480079	0.631171	15	14	0.651619		214	221	94	-0.480079	0.631171	-0.480079	0.631171	15	14	0.651619		203	232	83	-0.960159	0.336976	-0.960159	0.336976	15	14	0.353554		192	243	72	-1.44024
3321.42	3010.76	224	211	104	-0.0436436	0.965189	-0.0436436	0.965189	15	14	0.982865		211	224	91	-0.61101	0.541193	-0.61101	0.541193	15	14	0.561291		211	224	91	-0.61101	0.541193	-0.61101	0.541193	15	14	0.561291		208	227	88	-0.741941	0.458124	-0.741941	0.458124	15	14	0.477307		192	243	72	-1.44024
3323.35	3009.01	223	212	103	-0.0872872	0.930443	-0.0872872	0.930443	15	14	0.948623		210	225	90	-0.654654	0.512691	-0.654654	0.512691	15	14	0.532545		212	223	92	-0.567367	0.570466	-0.567367	0.570466	15	14	0.590745		208	227	88	-0.741941	0.458124	-0.741941	0.458124	15	14	0.477307		202	233	82	-1.0038
3325.28	3007.27	228	207	102	0.130931	0.89583	0.130931	0.89583	15	14	0.914475		209	226	89	-0.698297	0.484992	-0.698297	0.484992	15	14	0.504539		214	221	94	-0.480079	0.631171	-0.480079	0.631171	15	14	0.651619		204	231	84	-0.916515	0.359397	-0.916515	0.359397	15	14	0.376588		195	240	75	-1.30931
3327.21	3005.52	231	204	99	0.261861	0.793428	0.261861	0.793428	15	14	0.813179		211	224	91	-0.61101	0.541193	-0.61101	0.541193	15	14	0.561291		210	225	90	-0.654654	0.512691	-0.654654	0.512691	15	14	0.532545		202	233	82	-1.0038	0.315475	-1.0038	0.315475	15	14	0.331405		194	241	74	-1.35295
3329.14	3003.78	227	208	103	0.0872872	0.930443	0.0872872	0.930443	15	14	0.948623		216	219	96	-0.392792	0.694473	-0.392792	0.694473	15	14	0.71483		212	223	92	-0.567367	0.570466	-0.567367	0.570466	15	14	0.590745		203	232	83	-0.960159	0.336976	-0.960159	0.336976	15	14	0.353554		194	241	74	-1.35295
3331.07	3002.04	229	206	101	0.174574	0.861414	0.174574	0.861414	15	14	0.880478		215	220	95	-0.436436	0.662521	-0.436436	0.662521	15	14	0.682954		214	221	94	-0.480079	0.631171	-0.480079	0.631171	15	14	0.651619		203	232	83	-0.960159	0.336976	-0.960159	0.336976	15	14	0.353554		194	241	74	-1.35295
3332.99	3000.31	226	209	104	0.0436436	0.965189	0.0436436	0.965189	15	14	0.982865		216	219	96	-0.392792	0.694473	-0.392792	0.694473	15	14	0.71483		206	229	86	-0.829228	0.406976	-0.829228	0.406976	15	14	0.425262		202	233	82	-1.0038	0.315475	-1.0038	0.315475	15	14	0.331405		195	240	75	-1.30931
3334.92	2998.57	225	210	105	0	1	0	1	15	14	1.01714		214	221	94	-0.480079	0.631171	-0.480079	0.631171	15	14	0.651619		206	229	86	-0.829228	0.406976	-0.829228	0.406976	15	14	0.425262		201	234	81	-1.04745	0.294895	-1.04745	0.294895	15	14	0.310143		202	233	82	-1.0038
3336.85	2996.84	223	212	103	-0.0872872	0.930443	-0.0872872	0.930443	15	14	0.948623		209	226	89	-0.698297	0.484992	-0.698297	0.484992	15	14	0.504539		209	226	89	-0.698297	0.484992	-0.698297	0.484992	15	14	0.504539		206	229	86	-0.829228	0.406976	-0.829228	0.406976	15	14	0.425262		195	240	75	-1.30931
3338.78	2995.11	217	218	97	-0.349149	0.726978	-0.349149	0.726978	15	14	0.747192		207	228	87	-0.785584	0.432112	-0.785584	0.432112	15	14	0.450872		209	226	89	-0.698297	0.484992	-0.698297	0.484992	15	14	0.504539		204	231	84	-0.916515	0.359397	-0.916515	0.359397	15	14	0.376588		191	244	71	-1.48388
3340.71	2993.38	215	220	95	-0.436436	0.662521	-0.436436	0.662521	15	14	0.682954		206	229	86	-0.829228	0.406976	-0.829228	0.406976	15	14	0.425262		205	230	85	-0.872872	0.382734	-0.872872	0.382734	15	14	0.400494		200	235	80	-1.09109	0.275234	-1.09109	0.275234	15	14	0.289776		193	242	73	-1.39659
3342.64	2991.65	219	216	99	-0.261861	0.793428	-0.261861	0.793428	15	14	0.813179		210	225	90	-0.654654	0.512691	-0.654654	0.512691	15	14	0.532545		207	228	87	-0.785584	0.432112	-0.785584	0.432112	15	14	0.450872		202	233	82	-1.0038	0.315475	-1.0038	0.315475	15	14	0.331405		193	242	73	-1.39659
3344.57	2989.92	225	210	105	0	1	0	1	15	14	1.01714		214	221	94	-0.480079	0.631171	-0.480079	0.631171	15	14	0.651619		218	217	98	-0.305505	0.759982	-0.305505	0.759982	15	14	0.779995		205	230	85	-0.872872	0.382734	-0.872872	0.382734	15	14	0.400494		194	241	74	-1.35295
3346.5	2988.2	227	208	103	0.0872872	0.930443	0.0872872	0.930443	15	14	0.948623		213	222	93	-0.523723	0.600472	-0.523723	0.600472	15	14	0.620867		218	217	98	-0.305505	0.759982	-0.305505	0.759982	15	14	0.779995		205	230	85	-0.872872	0.382734	-0.872872	0.382734	15	14	0.400494		193	242	73	-1.39659
3348.42	2986.48	226	209	104	0.0436436	0.965189	0.0436436	0.965189	15	14	0.982865		213	222	93	-0.523723	0.600472	-0.523723	0.600472	15	14	0.620867		212	223	92	-0.567367	0.570466	-0.567367	0.570466	15	14	0.590745		214	221	94	-0.480079	0.631171	-0.480079	0.631171	15	14	0.651619		189	246	69	-1.57117
3350.35	2984.76	223	212	103	-0.0872872	0.930443	-0.0872872	0.930443	15	14	0.948623		211	224	91	-0.61101	0.541193	-0.61101	0.541193	15	14	0.561291		210	225	90	-0.654654	0.512691	-0.654654	0.512691	15	14	0.532545		212	223	92	-0.567367	0.570466	-0.567367	0.570466	15	14	0.590745		196	239	76	-1.26566
3352.28	2983.04	226	209	104	0.0436436	0.965189	0.0436436	0.965189	15	14	0.982865		213	222	93	-0.523723	0.600472	-0.523723	0.600472	15	14	0.620867		210	225	90	-0.654654	0.512691	-0.654654	0.512691	15	14	0.532545		207	228	87	-0.785584	0.432112	-0.785584	0.432112	15	14	0.450872		198	237	78	-1.17838
3354.21	2981.33	236	199	94	0.480079	0.631171	0.480079	0.631171	15	14	0.651619		208	227	88	-0.741941	0.458124	-0.741941	0.458124	15	14	0.477307		213	222	93	-0.523723	0.600472	-0.523723	0.600472	15	14	0.620867		200	235	80	-1.09109	0.275234	-1.09109	0.275234	15	14	0.289776		200	235	80	-1.09109
3356.14	2979.61	234	201	96	0.392792	0.694473	0.392792	0.694473	15	14	0.71483		207	228	87	-0.785584	0.432112	-0.785584	0.432112	15	14	0.450872		214	221	94	-0.480079	0.631171	-0.480079	0.631171	15	14	0.651619		207	228	87	-0.785584	0.432112	-0.785584	0.432112	15	14	0.450872		202	233	82	-1.0038
3358.07	2977.9	222	213	102	-0.130931	0.89583	-0.130931	0.89583	15	14	0.914475		209	226	89	-0.698297	0.484992	-0.698297	0.484992	15	14	0.504539		211	224	91	-0.61101	0.541193	-0.61101	0.541193	15	14	0.561291		203	232	83	-0.960159	0.336976	-0.960159	0.336976	15	14	0.353554		197	238	77	-1.22202
3360	2976.19	224	211	104	-0.0436436	0.965189	-0.0436436	0.965189	15	14	0.982865		211	224	91	-0.61101	0.541193	-0.61101	0.541193	15	14	0.561291		211	224	91	-0.61101	0.541193	-0.61101	0.541193	15	14	0.561291		209	226	89	-0.698297	0.484992	-0.698297	0.484992	15	14	0.504539		191	244	71	-1.48388
3361.93	2974.49	223	212	103	-0.0872872	0.930443	-0.0872872	0.930443	15	14	0.948623		208	227	88	-0.741941	0.458124	-0.741941	0.458124	15	14	0.477307		211	224	91	-0.61101	0.541193	-0.61101	0.541193	15	14	0.561291		203	232	83	-0.960159	0.336976	-0.960159	0.336976	15	14	0.353554		197	238	77	-1.22202
3363.86	2972.78	227	208	103	0.0872872	0.930443	0.0872872	0.930443	15	14	0.948623		212	223	92	-0.567367	0.570466	-0.567367	0.570466	15	14	0.590745		212	223	92	-0.567367	0.570466	-0.567367	0.570466	15	14	0.590745		204	231	84	-0.916515	0.359397	-0.916515	0.359397	15	14	0.376588		201	234	81	-1.04745
3365.78	2971.08	226	209	104	0.0436436	0.965189	0.0436436	0.965189	15	14	0.982865		210	225	90	-0.654654	0.512691	-0.654654	0.512691	15	14	0.532545		208	227	88	-0.741941	0.458124	-0.741941	0.458124	15	14	0.477307		201	234	81	-1.04745	0.294895	-1.04745	0.294895	15	14	0.310143		202	233	82	-1.0038
3367.71	2969.37	223	212	103	-0.0872872	0.930443	-0.0872872	0.930443	15	14	0.948623		211	224	91	-0.61101	0.541193	-0.61101	0.541193	15	14	0.561291		208	227	88	-0.741941	0.458124	-0.741941	0.458124	15	14	0.477307		204	231	84	-0.916515	0.359397	-0.916515	0.359397	15	14	0.376588		198	237	78	-1.17838
3369.64	2967.67	225	210	105	0	1	0	1	15	14	1.01714		211	224	91	-0.61101	0.541193	-0.61101	0.541193	15	14	0.561291		212	223	92	-0.567367	0.570466	-0.567367	0.570466	15	14	0.590745		208	227	88	-0.741941	0.458124	-0.741941	0.458124	15	14	0.477307		197	238	77	-1.22202
3371.57	2965.98	226	209	104	0.0436436	0.965189	0.0436436	0.965189	15	14	0.982865		209	226	89	-0.698297	0.484992	-0.698297	0.484992	15	14	0.504539		214	221	94	-0.480079	0.631171	-0.480079	0.631171	15	14	0.651619		207	228	87	-0.785584	0.432112	-0.785584	0.432112	15	14	0.450872		198	237	78	-1.17838
3373.5	2964.28	224	211	104	-0.0436436	0.965189	-0.0436436	0.965189	15	14	0.982865		212	223	92	-0.567367	0.570466	-0.567367	0.570466	15	14	0.590745		213	222	93	-0.523723	0.600472	-0.523723	0.600472	15	14	0.620867		204	231	84	-0.916515	0.359397	-0.916515	0.359397	15	14	0.376588		196	239	76	-1.26566
3375.43	2962.59	227	208	103	0.0872872	0.930443	0.0872872	0.930443	15	14	0.948623		216	219	96	-0.392792	0.694473	-0.392792	0.694473	15	14	0.71483		215	220	95	-0.436436	0.662521	-0.436436	0.662521	15	14	0.682954		208	227	88	-0.741941	0.458124	-0.741941	0.458124	15	14	0.477307		192	243	72	-1.44024
3377.36	2960.9	224	211	104	-0.0436436	0.965189	-0.0436436	0.965189	15	14	0.982865		210	225	90	-0.654654	0.512691	-0.654654	0.512691	15	14	0.532545		211	224	91	-0.61101	0.541193	-0.61101	0.541193	15	14	0.561291		208	227	88	-0.741941	0.458124	-0.741941	0.458124	15	14	0.477307		193	242	73	-1.39659
3379.29	2959.21	231	204	99	0.261861	0.793428	0.261861	0.793428	15	14	0.813179		215	220	95	-0.436436	0.662521	-0.436436	0.662521	15	14	0.682954		210	225	90	-0.654654	0.512691	-0.654654	0.512691	15	14	0.532545		207	228	87	-0.785584	0.432112	-0.785584	0.432112	15	14	0.450872		193	242	73	-1.39659
3381.21	2957.52	226	209	104	0.0436436	0.965189	0.0436436	0.965189	15	14	0.982865		211	224	91	-0.61101	0.541193	-0.61101	0.541193	15	14	0.561291		219	216	99	-0.261861	0.793428	-0.261861	0.793428	15	14	0.813179		203	232	83	-0.960159	0.336976	-0.960159	0.336976	15	14	0.353554		200	235	80	-1.09109
3383.14	2955.83	226	209	104	0.0436436	0.965189	0.0436436	0.965189	15	14	0.982865		213	222	93	-0.523723	0.600472	-0.523723	0.600472	15	14	0.620867		215	220	95	-0.436436	0.662521	-0.436436	0.662521	15	14	0.682954		207	228	87	-0.785584	0.432112	-0.785584	0.432112	15	14	0.450872		199	236	79	-1.13473
3385.07	2954.15	227	208	103	0.0872872	0.930443	0.0872872	0.930443	15	14	0.948623		216	219	96	-0.392792	0.694473	-0.392792	0.694473	15	14	0.71483		215	220	95	-0.436436	0.662521	-0.436436	0.662521	15	14	0.682954		208	227	88	-0.741941	0.458124	-0.741941	0.458124	15	14	0.477307		202	233	82	-1.0038
3387	2952.46	226	209	104	0.0436436	0.965189	0.0436436	0.965189	15	14	0.982865		210	225	90	-0.654654	0.512691	-0.654654	0.512691	15	14	0.532545		209	226	89	-0.698297	0.484992	-0.698297	0.484992	15	14	0.504539		206	229	86	-0.829228	0.406976	-0.829228	0.406976	15	14	0.425262		201	234	81	-1.04745
3388.93	2950.78	226	209	104	0.0436436	0.965189	0.0436436	0.965189	15	14	0.982865		208	227	88	-0.741941	0.458124	-0.741941	0.458124	15	14	0.477307		209	226	89	-0.698297	0.484992	-0.698297	0.484992	15	14	0.504539		202	233	82	-1.0038	0.315475	-1.0038	0.315475	15	14	0.331405		200	235	80	-1.09109
3390.86	2949.11	225	210	105	0	1	0	1	15	14	1.01714		217	218	97	-0.349149	0.726978	-0.349149	0.726978	15	14	0.747192		217	218	97	-0.349149	0.726978	-0.349149	0.726978	15	14	0.747192		208	227	88	-0.741941	0.458124	-0.741941	0.458124	15	14	0.477307		202	233	82	-1.0038
3392.79	2947.43	231	204	99	0.261861	0.793428	0.261861	0.793428	15	14	0.813179		223	212	103	-0.0872872	0.930443	-0.0872872	0.930443	15	14	0.948623		218	217	98	-0.305505	0.759982	-0.305505	0.759982	15	14	0.779995		212	223	92	-0.567367	0.570466	-0.567367	0.570466	15	14	0.590745		205	230	85	-0.872872
3394.72	2945.75	229	206	101	0.174574	0.861414	0.174574	0.861414	15	14	0.880478		220	215	100	-0.218218	0.827259	-0.218218	0.827259	15	14	0.846694		213	222	93	-0.523723	0.600472	-0.523723	0.600472	15	14	0.620867		214	221	94	-0.480079	0.631171	-0.480079	0.631171	15	14	0.651619		199	236	79	-1.13473
3396.64	2944.08	223	212	103	-0.0872872	0.930443	-0.0872872	0.930443	15	14	0.948623		215	220	95	-0.436436	0.662521	-0.436436	0.662521	15	14	0.682954		213	222	93	-0.523723	0.600472	-0.523723	0.600472	15	14	0.620867		210	225	90	-0.654654	0.512691	-0.654654	0.512691	15	14	0.532545		197	238	77	-1.22202
3398.57	2942.41	228	207	102	0.130931	0.89583	0.130931	0.89583	15	14	0.914475		211	224	91	-0.61101	0.541193	-0.61101	0.541193	15	14	0.561291		214	221	94	-0.480079	0.631171	-0.480079	0.631171	15	14	0.651619		212	223	92	-0.567367	0.570466	-0.567367	0.570466	15	14	0.590745		199	236	79	-1.13473
3400.5	2940.74	231	204	99	0.261861	0.793428	0.261861	0.793428	15	14	0.813179		210	225	90	-0.654654	0.512691	-0.654654	0.512691	15	14	0.532545		217	218	97	-0.349149	0.726978	-0.349149	0.726978	15	14	0.747192		209	226	89	-0.698297	0.484992	-0.698297	0.484992	15	14	0.504539		202	233	82	-1.0038
3402.43	2939.07	232	203	98	0.305505	0.759982	0.305505	0.759982	15	14	0.779995		219	216	99	-0.261861	0.793428	-0.261861	0.793428	15	14	0.813179		216	219	96	-0.392792	0.694473	-0.392792	0.694473	15	14	0.71483		208	227	88	-0.741941	0.458124	-0.741941	0.458124	15	14	0.477307		200	235	80	-1.09109
3404.36	2937.41	236	199	94	0.480079	0.631171	0.480079	0.631171	15	14	0.651619		219	216	99	-0.261861	0.793428	-0.261861	0.793428	15	14	0.813179		215	220	95	-0.436436	0.662521	-0.436436	0.662521	15	14	0.682954		211	224	91	-0.61101	0.541193	-0.61101	0.541193	15	14	0.561291		196	239	76	-1.26566
3406.29	2935.75	231	204	99	0.261861	0.793428	0.261861	0.793428	15	14	0.813179		214	221	94	-0.480079	0.631171	-0.480079	0.631171	15	14	0.651619		213	222	93	-0.523723	0.600472	-0.523723	0.600472	15	14	0.620867		215	220	95	-0.436436	0.662521	-0.436436	0.662521	15	14	0.682954		199	236	79	-1.13473
3408.22	2934.08	227	208	103	0.0872872	0.930443	0.0872872	0.930443	15	14	0.948623		217	218	97	-0.349149	0.726978	-0.349149	0.726978	15	14	0.747192		214	221	94	-0.480079	0.631171	-0.480079	0.631171	15	14	0.651619		212	223	92	-0.567367	0.570466	-0.567367	0.570466	15	14	0.590745		204	231	84	-0.916515
3410.15	2932.43	225	210	105	0	1	0	1	15	14	1.01714		217	218	97	-0.349149	0.726978	-0.349149	0.726978	15	14	0.747192		213	222	93	-0.523723	0.600472	-0.523723	0.600472	15	14	0.620867		207	228	87	-0.785584	0.432112	-0.785584	0.432112	15	14	0.450872		203	232	83	-0.960159
3412.08	2930.77	227	208	103	0.0872872	0.930443	0.0872872	0.930443	15	14	0.948623		213	222	93	-0.523723	0.600472	-0.523723	0.600472	15	14	0.620867		210	225	90	-0.654654	0.512691	-0.654654	0.512691	15	14	0.532545		208	227	88	-0.741941	0.458124	-0.741941	0.458124	15	14	0.477307		199	236	79	-1.13473
3414	2929.11	227	208	103	0.0872872	0.930443	0.0872872	0.930443	15	14	0.948623		215	220	95	-0.436436	0.662521	-0.436436	0.662521	15	14	0.682954		216	219	96	-0.392792	0.694473	-0.392792	0.694473	15	14	0.71483		210	225	90	-0.654654	0.512691	-0.654654	0.512691	15	14	0.532545		201	234	81	-1.04745
3415.93	2927.46	225	210	105	0	1	0	1	15	14	1.01714		218	217	98	-0.305505	0.759982	-0.305505	0.759982	15	14	0.779995		218	217	98	-0.305505	0.759982	-0.305505	0.759982	15	14	0.779995		209	226	89	-0.698297	0.484992	-0.698297	0.484992	15	14	0.504539		201	234	81	-1.04745
3417.86	2925.81	231	204	99	0.261861	0.793428	0.261861	0.793428	15	14	0.813179		217	218	97	-0.349149	0.726978	-0.349149	0.726978	15	14	0.747192		218	217	98	-0.305505	0.759982	-0.305505	0.759982	15	14	0.779995		210	225	90	-0.654654	0.512691	-0.654654	0.512691	15	14	0.532545		208	227	88	-0.741941
3419.79	2924.16	226	209	104	0.0436436	0.965189	0.0436436	0.965189	15	14	0.982865		214	221	94	-0.480079	0.631171	-0.480079	0.631171	15	14	0.651619		216	219	96	-0.392792	0.694473	-0.392792	0.694473	15	14	0.71483		201	234	81	-1.04745	0.294895	-1.04745	0.294895	15	14	0.310143		207	228	87	-0.785584
3421.72	2922.51	225	210	105	0	1	0	1	15	14	1.01714		208	227	88	-0.741941	0.458124	-0.741941	0.458124	15	14	0.477307		214	221	94	-0.480079	0.631171	-0.480079	0.631171	15	14	0.651619		199	236	79	-1.13473	0.256488	-1.13473	0.256488	15	14	0.270299		203	232	83	-0.960159
3423.65	2920.86	224	211	104	-0.0436436	0.965189	-0.0436436	0.965189	15	14	0.982865		212	223	92	-0.567367	0.570466	-0.567367	0.570466	15	14	0.590745		210	225	90	-0.654654	0.512691	-0.654654	0.512691	15	14	0.532545		201	234	81	-1.04745	0.294895	-1.04745	0.294895	15	14	0.310143		199	236	79	-1.13473
3425.58	2919.22	225	210	105	0	1	0	1	15	14	1.01714		213	222	93	-0.523723	0.600472	-0.523723	0.600472	15	14	0.620867		209	226	89	-0.698297	0.484992	-0.698297	0.484992	15	14	0.504539		203	232	83	-0.960159	0.336976	-0.960159	0.336976	15	14	0.353554		196	239	76	-1.26566
3427.51	2917.57	223	212	103	-0.0872872	0.930443	-0.0872872	0.930443	15	14	0.948623		214	221	94	-0.480079	0.631171	-0.480079	0.631171	15	14	0.651619		211	224	91	-0.61101	0.541193	-0.61101	0.541193	15	14	0.561291		211	224	91	-0.61101	0.541193	-0.61101	0.541193	15	14	0.561291		194	241	74	-1.35295
3429.43	2915.93	227	208	103	0.0872872	0.930443	0.0872872	0.930443	15	14	0.948623		216	219	96	-0.392792	0.694473	-0.392792	0.694473	15	14	0.71483		215	220	95	-0.436436	0.662521	-0.436436	0.662521	15	14	0.682954		213	222	93	-0.523723	0.600472	-0.523723	0.600472	15	14	0.620867		200	235	80	-1.09109
3431.36	2914.29	223	212	103	-0.0872872	0.930443	-0.0872872	0.930443	15	14	0.948623		216	219	96	-0.392792	0.694473	-0.392792	0.694473	15	14	0.71483		223	212	103	-0.0872872	0.930443	-0.0872872	0.930443	15	14	0.948623		210	225	90	-0.654654	0.512691	-0.654654	0.512691	15	14	0.532545		204	231	84	-0.916515
3433.29	2912.66	225	210	105	0	1	0	1	15	14	1.01714		219	216	99	-0.261861	0.793428	-0.261861	0.793428	15	14	0.813179		220	215	100	-0.218218	0.827259	-0.218218	0.827259	15	14	0.846694		210	225	90	-0.654654	0.512691	-0.654654	0.512691	15	14	0.532545		201	234	81	-1.04745
3435.22	2911.02	225	210	105	0	1	0	1	15	14	1.01714		224	211	104	-0.0436436	0.965189	-0.0436436	0.965189	15	14	0.982865		219	216	99	-0.261861	0.793428	-0.261861	0.793428	15	14	0.813179		204	231	84	-0.916515	0.359397	-0.916515	0.359397	15	14	0.376588		199	236	79	-1.13473
3437.15	2909.39	227	208	103	0.0872872	0.930443	0.0872872	0.930443	15	14	0.948623		219	216	99	-0.261861	0.793428	-0.261861	0.793428	15	14	0.813179		214	221	94	-0.480079	0.631171	-0.480079	0.631171	15	14	0.651619		200	235	80	-1.09109	0.275234	-1.09109	0.275234	15	14	0.289776		198	237	78	-1.17838
3439.08	2907.76	229	206	101	0.174574	0.861414	0.174574	0.861414	15	14	0.880478		219	216	99	-0.261861	0.793428	-0.261861	0.793428	15	14	0.813179		221	214	101	-0.174574	0.861414	-0.174574	0.861414	15	14	0.880478		214	221	94	-0.480079	0.631171	-0.480079	0.631171	15	14	0.651619		202	233	82	-1.0038
3441.01	2906.13	234	201	96	0.392792	0.694473	0.392792	0.694473	15	14	0.71483		222	213	102	-0.130931	0.89583	-0.130931	0.89583	15	14	0.914475		225	210	105	0	1	0	1	15	14	1.01714		216	219	96	-0.392792	0.694473	-0.392792	0.694473	15	14	0.71483		207	228	87	-0.785584
3442.94	2904.5	234	201	96	0.392792	0.694473	0.392792	0.694473	15	14	0.71483		221	214	101	-0.174574	0.861414	-0.174574	0.861414	15	14	0.880478		226	209	104	0.0436436	0.965189	0.0436436	0.965189	15	14	0.982865		215	220	95	-0.436436	0.662521	-0.436436	0.662521	15	14	0.682954		206	229	86	-0.829228
3444.87	2902.87	227	208	103	0.0872872	0.930443	0.0872872	0.930443	15	14	0.948623		223	212	103	-0.0872872	0.930443	-0.0872872	0.930443	15	14	0.948623		224	211	104	-0.0436436	0.965189	-0.0436436	0.965189	15	14	0.982865		210	225	90	-0.654654	0.512691	-0.654654	0.512691	15	14	0.532545		202	233	82	-1.0038
3446.79	2901.25	227	208	103	0.0872872	0.930443	0.0872872	0.930443	15	14	0.948623		227	208	103	0.0872872	0.930443	0.0872872	0.930443	15	14	0.948623		224	211	104	-0.0436436	0.965189	-0.0436436	0.965189	15	14	0.982865		209	226	89	-0.698297	0.484992	-0.698297	0.484992	15	14	0.504539		208	227	88	-0.741941
3448.72	2899.62	225	210	105	0	1	0	1	15	14	1.01714		223	212	103	-0.0872872	0.930443	-0.0872872	0.930443	15	14	0.948623		225	210	105	0	1	0	1	15	14	1.01714		209	226	89	-0.698297	0.484992	-0.698297	0.484992	15	14	0.504539		206	229	86	-0.829228
3450.65	2898	222	213	102	-0.130931	0.89583	-0.130931	0.89583	15	14	0.914475		218	217	98	-0.305505	0.759982	-0.305505	0.759982	15	14	0.779995		222	213	102	-0.130931	0.89583	-0.130931	0.89583	15	14	0.914475		210	225	90	-0.654654	0.512691	-0.654654	0.512691	15	14	0.532545		202	233	82	-1.0038
3452.58	2896.38	220	215	100	-0.218218	0.827259	-0.218218	0.827259	15	14	0.846694		217	218	97	-0.349149	0.726978	-0.349149	0.726978	15	14	0.747192		222	213	102	-0.130931	0.89583	-0.130931	0.89583	15	14	0.914475		208	227	88	-0.741941	0.458124	-0.741941	0.458124	15	14	0.477307		200	235	80	-1.09109
3454.51	2894.77	223	212	103	-0.0872872	0.930443	-0.0872872	0.930443	15	14	0.948623		216	219	96	-0.392792	0.694473	-0.392792	0.694473	15	14	0.71483		221	214	101	-0.174574	0.861414	-0.174574	0.861414	15	14	0.880478		207	228	87	-0.785584	0.432112	-0.785584	0.432112	15	14	0.450872		197	238	77	-1.22202
3456.44	2893.15	227	208	103	0.0872872	0.930443	0.0872872	0.930443	15	14	0.948623		223	212	103	-0.0872872	0.930443	-0.0872872	0.930443	15	14	0.948623		219	216	99	-0.261861	0.793428	-0.261861	0.793428	15	14	0.813179		210	225	90	-0.654654	0.512691	-0.654654	0.512691	15	14	0.532545		200	235	80	-1.09109
3458.37	2891.54	230	205	100	0.218218	0.827259	0.218218	0.827259	15	14	0.846694		223	212	103	-0.0872872	0.930443	-0.0872872	0.930443	15	14	0.948623		226	209	104	0.0436436	0.965189	0.0436436	0.965189	15	14	0.982865		209	226	89	-0.698297	0.484992	-0.698297	0.484992	15	14	0.504539		200	235	80	-1.09109
3460.3	2889.93	232	203	98	0.305505	0.759982	0.305505	0.759982	15	14	0.779995		224	211	104	-0.0436436	0.965189	-0.0436436	0.965189	15	14	0.982865		225	210	105	0	1	0	1	15	14	1.01714		208	227	88	-0.741941	0.458124	-0.741941	0.458124	15	14	0.477307		202	233	82	-1.0038
3462.22	2888.32	233	202	97	0.349149	0.726978	0.349149	0.726978	15	14	0.747192		227	208	103	0.0872872	0.930443	0.0872872	0.930443	15	14	0.948623		229	206	101	0.174574	0.861414	0.174574	0.861414	15	14	0.880478		209	226	89	-0.698297	0.484992	-0.698297	0.484992	15	14	0.504539		205	230	85	-0.872872
3464.15	2886.71	229	206	101	0.174574	0.861414	0.174574	0.861414	15	14	0.880478		225	210	105	0	1	0	1	15	14	1.01714		223	212	103	-0.0872872	0.930443	-0.0872872	0.930443	15	14	0.948623		211	224	91	-0.61101	0.541193	-0.61101	0.541193	15	14	0.561291		204	231	84	-0.916515
3466.08	2885.1	231	204	99	0.261861	0.793428	0.261861	0.793428	15	14	0.813179		223	212	103	-0.0872872	0.930443	-0.0872872	0.930443	15	14	0.948623		224	211	104	-0.0436436	0.965189	-0.0436436	0.965189	15	14	0.982865		215	220	95	-0.436436	0.662521	-0.436436	0.662521	15	14	0.682954		202	233	82	-1.0038
3468.01	2883.5	232	203	98	0.305505	0.759982	0.305505	0.759982	15	14	0.779995		229	206	101	0.174574	0.861414	0.174574	0.861414	15	14	0.880478		227	208	103	0.0872872	0.930443	0.0872872	0.930443	15	14	0.948623		212	223	92	-0.567367	0.570466	-0.567367	0.570466	15	14	0.590745		202	233	82	-1.0038
3469.94	2881.89	231	204	99	0.261861	0.793428	0.261861	0.793428	15	14	0.813179		223	212	103	-0.0872872	0.930443	-0.0872872	0.930443	15	14	0.948623		225	210	105	0	1	0	1	15	14	1.01714		210	225	90	-0.654654	0.512691	-0.654654	0.512691	15	14	0.532545		203	232	83	-0.960159
3471.87	2880.29	227	208	103	0.0872872	0.930443	0.0872872	0.930443	15	14	0.948623		223	212	103	-0.0872872	0.930443	-0.0872872	0.930443	15	14	0.948623		225	210	105	0	1	0	1	15	14	1.01714		213	222	93	-0.523723	0.600472	-0.523723	0.600472	15	14	0.620867		206	229	86	-0.829228
3473.8	2878.69	226	209	104	0.0436436	0.965189	0.0436436	0.965189	15	14	0.982865		223	212	103	-0.0872872	0.930443	-0.0872872	0.930443	15	14	0.948623		220	215	100	-0.218218	0.827259	-0.218218	0.827259	15	14	0.846694		217	218	97	-0.349149	0.726978	-0.349149	0.726978	15	14	0.747192		208	227	88	-0.741941
3475.73	2877.1	227	208	103	0.0872872	0.930443	0.0872872	0.930443	15	14	0.948623		226	209	104	0.0436436	0.965189	0.0436436	0.965189	15	14	0.982865		224	211	104	-0.0436436	0.965189	-0.0436436	0.965189	15	14	0.982865		215	220	95	-0.436436	0.662521	-0.436436	0.662521	15	14	0.682954		207	228	87	-0.785584
3477.66	2875.5	223	212	103	-0.0872872	0.930443	-0.0872872	0.930443	15	14	0.948623		225	210	105	0	1	0	1	15	14	1.01714		224	211	104	-0.0436436	0.965189	-0.0436436	0.965189	15	14	0.982865		207	228	87	-0.785584	0.432112	-0.785584	0.432112	15	14	0.450872		205	230	85	-0.872872
3479.58	2873.91	223	212	103	-0.0872872	0.930443	-0.0872872	0.930443	15	14	0.948623		224	211	104	-0.0436436	0.965189	-0.0436436	0.965189	15	14	0.982865		228	207	102	0.130931	0.89583	0.130931	0.89583	15	14	0.914475		210	225	90	-0.654654	0.512691	-0.654654	0.512691	15	14	0.532545		205	230	85	-0.872872
3481.51	2872.31	227	208	103	0.0872872	0.930443	0.0872872	0.930443	15	14	0.948623		227	208	103	0.0872872	0.930443	0.0872872	0.930443	15	14	0.948623		233	202	97	0.349149	0.726978	0.349149	0.726978	15	14	0.747192		212	223	92	-0.567367	0.570466	-0.567367	0.570466	15	14	0.590745		211	224	91	-0.61101
3483.44	2870.72	230	205	100	0.218218	0.827259	0.218218	0.827259	15	14	0.846694		229	206	101	0.174574	0.861414	0.174574	0.861414	15	14	0.880478		233	202	97	0.349149	0.726978	0.349149	0.726978	15	14	0.747192		214	221	94	-0.480079	0.631171	-0.480079	0.631171	15	14	0.651619		212	223	92	-0.567367
3485.37	2869.14	228	207	102	0.130931	0.89583	0.130931	0.89583	15	14	0.914475		231	204	99	0.261861	0.793428	0.261861	0.793428	15	14	0.813179		230	205	100	0.218218	0.827259	0.218218	0.827259	15	14	0.846694		211	224	91	-0.61101	0.541193	-0.61101	0.541193	15	14	0.561291		206	229	86	-0.829228
3487.3	2867.55	225	210	105	0	1	0	1	15	14	1.01714		233	202	97	0.349149	0.726978	0.349149	0.726978	15	14	0.747192		231	204	99	0.261861	0.793428	0.261861	0.793428	15	14	0.813179		213	222	93	-0.523723	0.600472	-0.523723	0.600472	15	14	0.620867		206	229	86	-0.829228
3489.23	2865.96	227	208	103	0.0872872	0.930443	0.0872872	0.930443	15	14	0.948623		230	205	100	0.218218	0.827259	0.218218	0.827259	15	14	0.846694		232	203	98	0.305505	0.759982	0.305505	0.759982	15	14	0.779995		210	225	90	-0.654654	0.512691	-0.654654	0.512691	15	14	0.532545		206	229	86	-0.829228
3491.16	2864.38	226	209	104	0.0436436	0.965189	0.0436436	0.965189	15	14	0.982865		226	209	104	0.0436436	0.965189	0.0436436	0.965189	15	14	0.982865		225	210	105	0	1	0	1	15	14	1.01714		210	225	90	-0.654654	0.512691	-0.654654	0.512691	15	14	0.532545		202	233	82	-1.0038
3493.09	2862.8	224	211	104	-0.0436436	0.965189	-0.0436436	0.965189	15	14	0.982865		226	209	104	0.0436436	0.965189	0.0436436	0.965189	15	14	0.982865		224	211	104	-0.0436436	0.965189	-0.0436436	0.965189	15	14	0.982865		213	222	93	-0.523723	0.600472	-0.523723	0.600472	15	14	0.620867		202	233	82	-1.0038
3495.01	2861.22	221	214	101	-0.174574	0.861414	-0.174574	0.861414	15	14	0.880478		226	209	104	0.0436436	0.965189	0.0436436	0.965189	15	14	0.982865		230	205	100	0.218218	0.827259	0.218218	0.827259	15	14	0.846694		218	217	98	-0.305505	0.759982	-0.305505	0.759982	15	14	0.779995		204	231	84	-0.916515
3496.94	2859.64	219	216	99	-0.261861	0.793428	-0.261861	0.793428	15	14	0.813179		224	211	104	-0.0436436	0.965189	-0.0436436	0.965189	15	14	0.982865		228	207	102	0.130931	0.89583	0.130931	0.89583	15	14	0.914475		214	221	94	-0.480079	0.631171	-0.480079	0.631171	15	14	0.651619		205	230	85	-0.872872
3498.87	2858.06	224	211	104	-0.0436436	0.965189	-0.0436436	0.965189	15	14	0.982865		225	210	105	0	1	0	1	15	14	1.01714		225	210	105	0	1	0	1	15	14	1.01714		209	226	89	-0.698297	0.484992	-0.698297	0.484992	15	14	0.504539		202	233	82	-1.0038
3500.8	2856.49	225	210	105	0	1	0	1	15	14	1.01714		230	205	100	0.218218	0.827259	0.218218	0.827259	15	14	0.846694		228	207	102	0.130931	0.89583	0.130931	0.89583	15	14	0.914475		219	216	99	-0.261861	0.793428	-0.261861	0.793428	15	14	0.813179		204	231	84	-0.916515
3502.73	2854.92	230	205	100	0.218218	0.827259	0.218218	0.827259	15	14	0.846694		235	200	95	0.436436	0.662521	0.436436	0.662521	15	14	0.682954		232	203	98	0.305505	0.759982	0.305505	0.759982	15	14	0.779995		225	210	105	0	1	0	1	15	14	1.01714		213	222	93	-0.523723
3504.66	2853.34	228	207	102	0.130931	0.89583	0.130931	0.89583	15	14	0.914475		230	205	100	0.218218	0.827259	0.218218	0.827259	15	14	0.846694		239	196	91	0.61101	0.541193	0.61101	0.541193	15	14	0.561291		220	215	100	-0.218218	0.827259	-0.218218	0.827259	15	14	0.846694		215	220	95	-0.436436
3506.59	2851.78	226	209	104	0.0436436	0.965189	0.0436436	0.965189	15	14	0.982865		231	204	99	0.261861	0.793428	0.261861	0.793428	15	14	0.813179		232	203	98	0.305505	0.759982	0.305505	0.759982	15	14	0.779995		219	216	99	-0.261861	0.793428	-0.261861	0.793428	15	14	0.813179		217	218	97	-0.349149
3508.52	2850.21	229	206	101	0.174574	0.861414	0.174574	0.861414	15	14	0.880478		231	204	99	0.261861	0.793428	0.261861	0.793428	15	14	0.813179		238	197	92	0.567367	0.570466	0.567367	0.570466	15	14	0.590745		225	210	105	0	1	0	1	15	14	1.01714		221	214	101	-0.174574
3510.45	2848.64	221	214	101	-0.174574	0.861414	-0.174574	0.861414	15	14	0.880478		229	206	101	0.174574	0.861414	0.174574	0.861414	15	14	0.880478		239	196	91	0.61101	0.541193	0.61101	0.541193	15	14	0.561291		221	214	101	-0.174574	0.861414	-0.174574	0.861414	15	14	0.880478		216	219	96	-0.392792
3512.37	2847.08	225	210	105	0	1	0	1	15	14	1.01714		231	204	99	0.261861	0.793428	0.261861	0.793428	15	14	0.813179		230	205	100	0.218218	0.827259	0.218218	0.827259	15	14	0.846694		215	220	95	-0.436436	0.662521	-0.436436	0.662521	15	14	0.682954		206	229	86	-0.829228
3514.3	2845.51	224	211	104	-0.0436436	0.965189	-0.0436436	0.965189	15	14	0.982865		229	206	101	0.174574	0.861414	0.174574	0.861414	15	14	0.880478		229	206	101	0.174574	0.861414	0.174574	0.861414	15	14	0.880478		209	226	89	-0.698297	0.484992	-0.698297	0.484992	15	14	0.504539		202	233	82	-1.0038
3516.23	2843.95	225	210	105	0	1	0	1	15	14	1.01714		225	210	105	0	1	0	1	15	14	1.01714		236	199	94	0.480079	0.631171	0.480079	0.631171	15	14	0.651619		213	222	93	-0.523723	0.600472	-0.523723	0.600472	15	14	0.620867		209	226	89	-0.698297
3518.16	2842.39	225	210	105	0	1	0	1	15	14	1.01714		227	208	103	0.0872872	0.930443	0.0872872	0.930443	15	14	0.948623		237	198	93	0.523723	0.600472	0.523723	0.600472	15	14	0.620867		221	214	101	-0.174574	0.861414	-0.174574	0.861414	15	14	0.880478		213	222	93	-0.523723
3520.09	2840.84	221	214	101	-0.174574	0.861414	-0.174574	0.861414	15	14	0.880478		225	210	105	0	1	0	1	15	14	1.01714		235	200	95	0.436436	0.662521	0.436436	0.662521	15	14	0.682954		219	216	99	-0.261861	0.793428	-0.261861	0.793428	15	14	0.813179		209	226	89	-0.698297
3522.02	2839.28	224	211	104	-0.0436436	0.965189	-0.0436436	0.965189	15	14	0.982865		226	209	104	0.0436436	0.965189	0.0436436	0.965189	15	14	0.982865		230	205	100	0.218218	0.827259	0.218218	0.827259	15	14	0.846694		224	211	104	-0.0436436	0.965189	-0.0436436	0.965189	15	14	0.982865		211	224	91	-0.61101
3523.95	2837.73	229	206	101	0.174574	0.861414	0.174574	0.861414	15	14	0.880478		236	199	94	0.480079	0.631171	0.480079	0.631171	15	14	0.651619		248	187	82	1.0038	0.315475	1.0038	0.315475	15	14	0.331405		220	215	100	-0.218218	0.827259	-0.218218	0.827259	15	14	0.846694		222	213	102	-0.130931
3525.88	2836.17	236	199	94	0.480079	0.631171	0.480079	0.631171	15	14	0.651619		240	195	90	0.654654	0.512691	0.654654	0.512691	15	14	0.532545		257	178	73	1.39659	0.162537	1.39659	0.162537	15	14	0.171789		226	209	104	0.0436436	0.965189	0.0436436	0.965189	15	14	0.982865		229	206	101	0.174574
3527.8	2834.62	240	195	90	0.654654	0.512691	0.654654	0.512691	15	14	0.532545		239	196	91	0.61101	0.541193	0.61101	0.541193	15	14	0.561291		261	174	69	1.57117	0.116144	1.57117	0.116144	15	14	0.122524		230	205	100	0.218218	0.827259	0.218218	0.827259	15	14	0.846694		232	203	98	0.305505
3529.73	2833.08	242	193	88	0.741941	0.458124	0.741941	0.458124	15	14	0.477307		233	202	97	0.349149	0.726978	0.349149	0.726978	15	14	0.747192		253	182	77	1.22202	0.221701	1.22202	0.221701	15	14	0.234007		220	215	100	-0.218218	0.827259	-0.218218	0.827259	15	14	0.846694		230	205	100	0.218218
3531.66	2831.53	229	206	101	0.174574	0.861414	0.174574	0.861414	15	14	0.880478		228	207	102	0.130931	0.89583	0.130931	0.89583	15	14	0.914475		241	194	89	0.698297	0.484992	0.698297	0.484992	15	14	0.504539		224	211	104	-0.0436436	0.965189	-0.0436436	0.965189	15	14	0.982865		216	219	96	-0.392792
3533.59	2829.98	224	211	104	-0.0436436	0.965189	-0.0436436	0.965189	15	14	0.982865		227	208	103	0.0872872	0.930443	0.0872872	0.930443	15	14	0.948623		231	204	99	0.261861	0.793428	0.261861	0.793428	15	14	0.813179		219	216	99	-0.261861	0.793428	-0.261861	0.793428	15	14	0.813179		214	221	94	-0.480079
3535.52	2828.44	229	206	101	0.174574	0.861414	0.174574	0.861414	15	14	0.880478		231	204	99	0.261861	0.793428	0.261861	0.793428	15	14	0.813179		237	198	93	0.523723	0.600472	0.523723	0.600472	15	14	0.620867		222	213	102	-0.130931	0.89583	-0.130931	0.89583	15	14	0.914475		221	214	101	-0.174574
3537.45	2826.9	226	209	104	0.0436436	0.965189	0.0436436	0.965189	15	14	0.982865		230	205	100	0.218218	0.827259	0.218218	0.827259	15	14	0.846694		237	198	93	0.523723	0.600472	0.523723	0.600472	15	14	0.620867		224	211	104	-0.0436436	0.965189	-0.0436436	0.965189	15	14	0.982865		219	216	99	-0.261861
3539.38	2825.36	221	214	101	-0.174574	0.861414	-0.174574	0.861414	15	14	0.880478		223	212	103	-0.0872872	0.930443	-0.0872872	0.930443	15	14	0.948623		231	204	99	0.261861	0.793428	0.261861	0.793428	15	14	0.813179		222	213	102	-0.130931	0.89583	-0.130931	0.89583	15	14	0.914475		211	224	91	-0.61101
3541.31	2823.82	220	215	100	-0.218218	0.827259	-0.218218	0.827259	15	14	0.846694		222	213	102	-0.130931	0.89583	-0.130931	0.89583	15	14	0.914475		228	207	102	0.130931	0.89583	0.130931	0.89583	15	14	0.914475		222	213	102	-0.130931	0.89583	-0.130931	0.89583	15	14	0.914475		211	224	91	-0.61101
3543.23	2822.28	225	210	105	0	1	0	1	15	14	1.01714		226	209	104	0.0436436	0.965189	0.0436436	0.965189	15	14	0.982865		229	206	101	0.174574	0.861414	0.174574	0.861414	15	14	0.880478		225	210	105	0	1	0	1	15	14	1.01714		213	222	93	-0.523723
3545.16	2820.74	235	200	95	0.436436	0.662521	0.436436	0.662521	15	14	0.682954		236	199	94	0.480079	0.631171	0.480079	0.631171	15	14	0.651619		247	188	83	0.960159	0.336976	0.960159	0.336976	15	14	0.353554		227	208	103	0.0872872	0.930443	0.0872872	0.930443	15	14	0.948623		224	211	104	-0.0436436
3547.09	2819.21	231	204	99	0.261861	0.793428	0.261861	0.793428	15	14	0.813179		233	202	97	0.349149	0.726978	0.349149	0.726978	15	14	0.747192		254	181	76	1.26566	0.205634	1.26566	0.205634	15	14	0.217176		222	213	102	-0.130931	0.89583	-0.130931	0.89583	15	14	0.914475		226	209	104	0.0436436
3549.02	2817.68	226	209	104	0.0436436	0.965189	0.0436436	0.965189	15	14	0.982865		230	205	100	0.218218	0.827259	0.218218	0.827259	15	14	0.846694		246	189	84	0.916515	0.359397	0.916515	0.359397	15	14	0.376588		223	212	103	-0.0872872	0.930443	-0.0872872	0.930443	15	14	0.948623		219	216	99	-0.261861
3550.95	2816.15	227	208	103	0.0872872	0.930443	0.0872872	0.930443	15	14	0.948623		235	200	95	0.436436	0.662521	0.436436	0.662521	15	14	0.682954		252	183	78	1.17838	0.238647	1.17838	0.238647	15	14	0.251712		225	210	105	0	1	0	1	15	14	1.01714		232	203	98	0.305505
3552.88	2814.62	231	204	99	0.261861	0.793428	0.261861	0.793428	15	14	0.813179		234	201	96	0.392792	0.694473	0.392792	0.694473	15	14	0.71483		256	179	74	1.35295	0.176072	1.35295	0.176072	15	14	0.186083		221	214	101	-0.174574	0.861414	-0.174574	0.861414	15	14	0.880478		230	205	100	0.218218
3554.81	2813.09	227	208	103	0.0872872	0.930443	0.0872872	0.930443	15	14	0.948623		229	206	101	0.174574	0.861414	0.174574	0.861414	15	14	0.880478		245	190	85	0.872872	0.382734	0.872872	0.382734	15	14	0.400494		222	213	102	-0.130931	0.89583	-0.130931	0.89583	15	14	0.914475		215	220	95	-0.436436
3556.74	2811.57	224	211	104	-0.0436436	0.965189	-0.0436436	0.965189	15	14	0.982865		222	213	102	-0.130931	0.89583	-0.130931	0.89583	15	14	0.914475		245	190	85	0.872872	0.382734	0.872872	0.382734	15	14	0.400494		223	212	103	-0.0872872	0.930443	-0.0872872	0.930443	15	14	0.948623		213	222	93	-0.523723
3558.67	2810.04	222	213	102	-0.130931	0.89583	-0.130931	0.89583	15	14	0.914475		228	207	102	0.130931	0.89583	0.130931	0.89583	15	14	0.914475		246	189	84	0.916515	0.359397	0.916515	0.359397	15	14	0.376588		220	215	100	-0.218218	0.827259	-0.218218	0.827259	15	14	0.846694		217	218	97	-0.349149
3560.59	2808.52	223	212	103	-0.0872872	0.930443	-0.0872872	0.930443	15	14	0.948623		224	211	104	-0.0436436	0.965189	-0.0436436	0.965189	15	14	0.982865		253	182	77	1.22202	0.221701	1.22202	0.221701	15	14	0.234007		222	213	102	-0.130931	0.89583	-0.130931	0.89583	15	14	0.914475		225	210	105	0
3562.52	2807	229	206	101	0.174574	0.861414	0.174574	0.861414	15	14	0.880478		222	213	102	-0.130931	0.89583	-0.130931	0.89583	15	14	0.914475		259	176	71	1.48388	0.137841	1.48388	0.137841	15	14	0.145619		222	213	102	-0.130931	0.89583	-0.130931	0.89583	15	14	0.914475		234	201	96	0.392792
3564.45	2805.48	232	203	98	0.305505	0.759982	0.305505	0.759982	15	14	0.779995		240.5	194.5	89.5	0.676475	0.498739	0.676559	0.498686	15	14	0.504539		268	167	62	1.87667	0.0605637	1.87667	0.0605637	15	14	0.0629534		233	202	97	0.349149	0.726978	0.349149	0.726978	15	14	0.747192		256	179	74	1.35295
3566.38	2803.96	228	207	102	0.130931	0.89583	0.130931	0.89583	15	14	0.914475		242	193	88	0.741941	0.458124	0.741941	0.458124	15	14	0.477307		276	159	54	2.22582	0.0260268	2.22582	0.0260268	15	14	0.025885		232	203	98	0.305505	0.759982	0.305505	0.759982	15	14	0.779995		261	174	69	1.57117
3568.31	2802.45	224	211	104	-0.0436436	0.965189	-0.0436436	0.965189	15	14	0.982865		238	197	92	0.567367	0.570466	0.567367	0.570466	15	14	0.590745		279	156	51	2.35675	0.0184361	2.35675	0.0184361	15	14	0.0178436		240	195	90	0.654654	0.512691	0.654654	0.512691	15	14	0.532545		258	177	72	1.44024
3570.24	2800.93	226	209	104	0.0436436	0.965189	0.0436436	0.965189	15	14	0.982865		226	209	104	0.0436436	0.965189	0.0436436	0.965189	15	14	0.982865		261	174	69	1.57117	0.116144	1.57117	0.116144	15	14	0.122524		231	204	99	0.261861	0.793428	0.261861	0.793428	15	14	0.813179		239	196	91	0.61101
3572.17	2799.42	225	210	105	0	1	0	1	15	14	1.01714		227	208	103	0.0872872	0.930443	0.0872872	0.930443	15	14	0.948623		258	177	72	1.44024	0.149801	1.44024	0.149801	15	14	0.158309		229	206	101	0.174574	0.861414	0.174574	0.861414	15	14	0.880478		228	207	102	0.130931
3574.1	2797.91	224	211	104	-0.0436436	0.965189	-0.0436436	0.965189	15	14	0.982865		223	212	103	-0.0872872	0.930443	-0.0872872	0.930443	15	14	0.948623		258	177	72	1.44024	0.149801	1.44024	0.149801	15	14	0.158309		230	205	100	0.218218	0.827259	0.218218	0.827259	15	14	0.846694		231	204	99	0.261861
3576.02	2796.4	224	211	104	-0.0436436	0.965189	-0.0436436	0.965189	15	14	0.982865		219	216	99	-0.261861	0.793428	-0.261861	0.793428	15	14	0.813179		260	175	70	1.52753	0.126631	1.52753	0.126631	15	14	0.1337		229	206	101	0.174574	0.861414	0.174574	0.861414	15	14	0.880478		233	202	97	0.349149
3577.95	2794.89	217	218	97	-0.349149	0.726978	-0.349149	0.726978	15	14	0.747192		216	219	96	-0.392792	0.694473	-0.392792	0.694473	15	14	0.71483		257	178	73	1.39659	0.162537	1.39659	0.162537	15	14	0.171789		229	206	101	0.174574	0.861414	0.174574	0.861414	15	14	0.880478		229	206	101	0.174574
3579.88	2793.39	216	219	96	-0.392792	0.694473	-0.392792	0.694473	15	14	0.71483		219	216	99	-0.261861	0.793428	-0.261861	0.793428	15	14	0.813179		251	184	79	1.13473	0.256488	1.13473	0.256488	15	14	0.270299		227	208	103	0.0872872	0.930443	0.0872872	0.930443	15	14	0.948623		213	222	93	-0.523723
3581.81	2791.88	211	224	91	-0.61101	0.541193	-0.61101	0.541193	15	14	0.561291		218	217	98	-0.305505	0.759982	-0.305505	0.759982	15	14	0.779995		250	185	80	1.09109	0.275234	1.09109	0.275234	15	14	0.289776		226	209	104	0.0436436	0.965189	0.0436436	0.965189	15	14	0.982865		214	221	94	-0.480079
3583.74	2790.38	220	215	100	-0.218218	0.827259	-0.218218	0.827259	15	14	0.846694		225	210	105	0	1	0	1	15	14	1.01714		261	174	69	1.57117	0.116144	1.57117	0.116144	15	14	0.122524		228	207	102	0.130931	0.89583	0.130931	0.89583	15	14	0.914475		233	202	97	0.349149
3585.67	2788.88	237	198	93	0.523723	0.600472	0.523723	0.600472	15	14	0.620867		237	198	93	0.523723	0.600472	0.523723	0.600472	15	14	0.620867		270	165	60	1.96396	0.0495355	1.96396	0.0495355	15	14	0.0510899		237	198	93	0.523723	0.600472	0.523723	0.600472	15	14	0.620867		270	165	60	1.96396
3587.6	2787.38	230	205	100	0.218218	0.827259	0.218218	0.827259	15	14	0.846694		231	204	99	0.261861	0.793428	0.261861	0.793428	15	14	0.813179		275	160	55	2.18218	0.0290971	2.18218	0.0290971	15	14	0.029159		241	194	89	0.698297	0.484992	0.698297	0.484992	15	14	0.504539		273	162	57	2.09489
3589.53	2785.88	225	210	105	0	1	0	1	15	14	1.01714		224	211	104	-0.0436436	0.965189	-0.0436436	0.965189	15	14	0.982865		268	167	62	1.87667	0.0605637	1.87667	0.0605637	15	14	0.0629534		236	199	94	0.480079	0.631171	0.480079	0.631171	15	14	0.651619		261	174	69	1.57117
3591.46	2784.39	223	212	103	-0.0872872	0.930443	-0.0872872	0.930443	15	14	0.948623		224	211	104	-0.0436436	0.965189	-0.0436436	0.965189	15	14	0.982865		263	172	67	1.65846	0.0972264	1.65846	0.0972264	15	14	0.102309		224	211	104	-0.0436436	0.965189	-0.0436436	0.965189	15	14	0.982865		240	195	90	0.654654
3593.38	2782.89	229	206	101	0.174574	0.861414	0.174574	0.861414	15	14	0.880478		232	203	98	0.305505	0.759982	0.305505	0.759982	15	14	0.779995		267	168	63	1.83303	0.066799	1.83303	0.066799	15	14	0.0696586		227	208	103	0.0872872	0.930443	0.0872872	0.930443	15	14	0.948623		249	186	81	1.04745
3595.31	2781.4	231	204	99	0.261861	0.793428	0.261861	0.793428	15	14	0.813179		229	206	101	0.174574	0.861414	0.174574	0.861414	15	14	0.880478		270	165	60	1.96396	0.0495355	1.96396	0.0495355	15	14	0.0510899		229	206	101	0.174574	0.861414	0.174574	0.861414	15	14	0.880478		256	179	74	1.35295
3597.24	2779.91	224	211	104	-0.0436436	0.965189	-0.0436436	0.965189	15	14	0.982865		231	204	99	0.261861	0.793428	0.261861	0.793428	15	14	0.813179		266	169	64	1.78939	0.0735535	1.78939	0.0735535	15	14	0.076919		228	207	102	0.130931	0.89583	0.130931	0.89583	15	14	0.914475		254	181	76	1.26566
3599.17	2778.42	223	212	103	-0.0872872	0.930443	-0.0872872	0.930443	15	14	0.948623		221	214	101	-0.174574	0.861414	-0.174574	0.861414	15	14	0.880478		261	174	69	1.57117	0.116144	1.57117	0.116144	15	14	0.122524		231	204	99	0.261861	0.793428	0.261861	0.793428	15	14	0.813179		252	183	78	1.17838
3601.1	2776.93	221	214	101	-0.174574	0.861414	-0.174574	0.861414	15	14	0.880478		207	228	87	-0.785584	0.432112	-0.785584	0.432112	15	14	0.450872		258	177	72	1.44024	0.149801	1.44024	0.149801	15	14	0.158309		224	211	104	-0.0436436	0.965189	-0.0436436	0.965189	15	14	0.982865		242	193	88	0.741941
3603.03	2775.44	214	221	94	-0.480079	0.631171	-0.480079	0.631171	15	14	0.651619		209	226	89	-0.698297	0.484992	-0.698297	0.484992	15	14	0.504539		254	181	76	1.26566	0.205634	1.26566	0.205634	15	14	0.217176		221	214	101	-0.174574	0.861414	-0.174574	0.861414	15	14	0.880478		236	199	94	0.480079
3604.96	2773.96	220	215	100	-0.218218	0.827259	-0.218218	0.827259	15	14	0.846694		215	220	95	-0.436436	0.662521	-0.436436	0.662521	15	14	0.682954		258	177	72	1.44024	0.149801	1.44024	0.149801	15	14	0.158309		222	213	102	-0.130931	0.89583	-0.130931	0.89583	15	14	0.914475		242	193	88	0.741941
3606.89	2772.47	227	208	103	0.0872872	0.930443	0.0872872	0.930443	15	14	0.948623		229	206	101	0.174574	0.861414	0.174574	0.861414	15	14	0.880478		268	167	62	1.87667	0.0605637	1.87667	0.0605637	15	14	0.0629534		230	205	100	0.218218	0.827259	0.218218	0.827259	15	14	0.846694		262	173	68	1.61481
3608.81	2770.99	231	204	99	0.261861	0.793428	0.261861	0.793428	15	14	0.813179		228	207	102	0.130931	0.89583	0.130931	0.89583	15	14	0.914475		267	168	63	1.83303	0.066799	1.83303	0.066799	15	14	0.0696586		233	202	97	0.349149	0.726978	0.349149	0.726978	15	14	0.747192		273	162	57	2.09489
3610.74	2769.51	232	203	98	0.305505	0.759982	0.305505	0.759982	15	14	0.779995		229	206	101	0.174574	0.861414	0.174574	0.861414	15	14	0.880478		275	160	55	2.18218	0.0290971	2.18218	0.0290971	15	14	0.029159	1.28705e-06	228	207	102	0.130931	0.89583	0.130931	0.89583	15	14	0.914475		266	169	64	1.78939
3612.67	2768.03	235	200	95	0.436436	0.662521	0.436436	0.662521	15	14	0.682954		229	206	101	0.174574	0.861414	0.174574	0.861414	15	14	0.880478		274	161	56	2.13854	0.0324741	2.13854	0.0324741	15	14	0.0327702		238	197	92	0.567367	0.570466	0.567367	0.570466	15	14	0.590745		271	164	59	2.0076
3614.6	2766.56	234	201	96	0.392792	0.694473	0.392792	0.694473	15	14	0.71483		224	211	104	-0.0436436	0.965189	-0.0436436	0.965189	15	14	0.982865		274	161	56	2.13854	0.0324741	2.13854	0.0324741	15	14	0.0327702		238	197	92	0.567367	0.570466	0.567367	0.570466	15	14	0.590745		274	161	56	2.13854
3616.53	2765.08	227	208	103	0.0872872	0.930443	0.0872872	0.930443	15	14	0.948623		219	216	99	-0.261861	0.793428	-0.261861	0.793428	15	14	0.813179		272	163	58	2.05125	0.0402436	2.05125	0.0402436	15	14	0.041102		239	196	91	0.61101	0.541193	0.61101	0.541193	15	14	0.561291		269	166	61	1.92032
3618.46	2763.61	228	207	102	0.130931	0.89583	0.130931	0.89583	15	14	0.914475		221	214	101	-0.174574	0.861414	-0.174574	0.861414	15	14	0.880478		265	170	65	1.74574	0.0808565	1.74574	0.0808565	15	14	0.0847612		238	197	92	0.567367	0.570466	0.567367	0.570466	15	14	0.590745		265	170	65	1.74574
3620.39	2762.14	232	203	98	0.305505	0.759982	0.305505	0.759982	15	14	0.779995		220	215	100	-0.218218	0.827259	-0.218218	0.827259	15	14	0.846694		272	163	58	2.05125	0.0402436	2.05125	0.0402436	15	14	0.041102		236	199	94	0.480079	0.631171	0.480079	0.631171	15	14	0.651619		262	173	68	1.61481
3622.32	2760.66	227	208	103	0.0872872	0.930443	0.0872872	0.930443	15	14	0.948623		223	212	103	-0.0872872	0.930443	-0.0872872	0.930443	15	14	0.948623		259	176	71	1.48388	0.137841	1.48388	0.137841	15	14	0.145619		216	219	96	-0.392792	0.694473	-0.392792	0.694473	15	14	0.71483		247	188	83	0.960159
[truncated: 222 more rows]
[truncated: 7 more columns]
