# Supplementary material
Source: MDPI journal article supplement (https://www.mdpi.com/2073-4441/13/11/1475)
Supplement: s1 [file s1 › Supplementary files/S1_2_15032017_File.xls]

## Sheet: Spectra_ICH_2017_1_all
WL, cm-1	WL, nm	eV	Rank Sum	Rank Sum	U	Z	p-level	Z	p-level	Valid N	Valid N	2*1sided	pcum	Rank Sum	Rank Sum	U	Z	p-level	Z	p-level	Valid N	Valid N	2*1sided	pcum	Rank Sum	Rank Sum	U	Z	p-level	Z	p-level	Valid N	Valid N	2*1sided	pcum	Rank Sum	Rank Sum	U	Z	p-level	Z	p-level	Valid N	Valid N	2*1sided	pcum	Rank Sum	Rank Sum	U
			lyd	hc				adjusted		lyd	hc	exact p		veb	hc				adjusted		veb	hc	exact p		all	hc				adjusted		all	hc	exact p		hypl	hc				adjusted		hypl	hc	exact p		hgch	hc
948.977	10537.7	0.117658	260	175	70	1.52753	0.126631	1.52753	0.126631	15	14	0.1337		246	160	55	1.97575	0.048184	1.97575	0.048184	14	14	0.049736		256	179	74	1.35295	0.176072	1.35295	0.176072	15	14	0.186083		254	181	76	1.26566	0.205634	1.26566	0.205634	15	14	0.217176		268	167	62
950.906	10516.3	0.117897	247	188	83	0.96016	0.336976	0.96016	0.336976	15	14	0.353554		230	176	71	1.24059	0.214759	1.24059	0.214759	14	14	0.227321		235	200	95	0.436436	0.662521	0.436436	0.662521	15	14	0.682954		246	189	84	0.91652	0.359397	0.91652	0.359397	15	14	0.376588		251	184	79
952.835	10495	0.118136	257	178	73	1.39659	0.162537	1.39659	0.162537	15	14	0.171789		230	176	71	1.24059	0.214759	1.24059	0.214759	14	14	0.227321		231	204	99	0.261861	0.793428	0.261861	0.793428	15	14	0.813179		234	201	96	0.39279	0.694473	0.39279	0.694473	15	14	0.71483		268	167	62
954.764	10473.8	0.118376	242	193	88	0.74194	0.458124	0.74194	0.458124	15	14	0.477307		227	179	74	1.10274	0.270139	1.10274	0.270139	14	14	0.285176		212	223	92	-0.567367	0.570466	-0.567367	0.570466	15	14	0.590745		193	242	73	-1.39659	0.162537	-1.39659	0.162537	15	14	0.171789		230	205	100
956.693	10452.7	0.118615	260	175	70	1.52753	0.126631	1.52753	0.126631	15	14	0.1337		231	175	70	1.28653	0.198257	1.28653	0.198257	14	14	0.209978		245	190	85	0.872872	0.382734	0.872872	0.382734	15	14	0.400494		212	223	92	-0.56737	0.570466	-0.56737	0.570466	15	14	0.590745		246	189	84
958.622	10431.6	0.118854	262	173	68	1.61481	0.106352	1.61481	0.106352	15	14	0.11207		233	173	68	1.37843	0.168071	1.37843	0.168071	14	14	0.178112		237	198	93	0.523723	0.600472	0.523723	0.600472	15	14	0.620867		237	198	93	0.52372	0.600472	0.52372	0.600472	15	14	0.620867		231	204	99
960.55	10410.7	0.119093	245	190	85	0.87287	0.382734	0.87287	0.382734	15	14	0.400494		214	192	87	0.505424	0.613261	0.505424	0.613261	14	14	0.634669		235	200	95	0.436436	0.662521	0.436436	0.662521	15	14	0.682954		211	224	91	-0.61101	0.541193	-0.61101	0.541193	15	14	0.561291		219	216	99
962.479	10389.8	0.119332	231	204	99	0.26186	0.793428	0.26186	0.793428	15	14	0.813179		202	204	97	-0.045948	0.963352	-0.045948	0.963352	14	14	0.981969		228	207	102	0.130931	0.89583	0.130931	0.89583	15	14	0.914475		186	249	66	-1.7021	0.088738	-1.7021	0.088738	15	14	0.093216		221	214	101
964.408	10369.1	0.119571	215	220	95	-0.43644	0.662521	-0.43644	0.662521	15	14	0.682954		184	222	79	-0.873006	0.382661	-0.873006	0.382661	14	14	0.401263		215	220	95	-0.436436	0.662521	-0.436436	0.662521	15	14	0.682954		192	243	72	-1.44024	0.149801	-1.44024	0.149801	15	14	0.158309		210	225	90
966.337	10348.4	0.11981	207	228	87	-0.78558	0.432112	-0.78558	0.432112	15	14	0.450872		187	219	82	-0.735163	0.462241	-0.735163	0.462241	14	14	0.482401		203	232	83	-0.960159	0.336976	-0.960159	0.336976	15	14	0.353554		188	247	68	-1.61481	0.106352	-1.61481	0.106352	15	14	0.11207		223	212	103
968.266	10327.7	0.12005	196	239	76	-1.26566	0.205634	-1.26566	0.205634	15	14	0.217176		193	213	88	-0.459477	0.645892	-0.459477	0.645892	14	14	0.667331		220	215	100	-0.218218	0.827259	-0.218218	0.827259	15	14	0.846694		196	239	76	-1.26566	0.205634	-1.26566	0.205634	15	14	0.217176		232	203	98
970.194	10307.2	0.120289	230	205	100	0.21822	0.827259	0.21822	0.827259	15	14	0.846694		220	186	81	0.781111	0.434738	0.781111	0.434738	14	14	0.454438		232	203	98	0.305505	0.759982	0.305505	0.759982	15	14	0.779995		234	201	96	0.39279	0.694473	0.39279	0.694473	15	14	0.71483		254	181	76
972.123	10286.8	0.120528	217	218	97	-0.34915	0.726978	-0.34915	0.726978	15	14	0.747192		209	197	92	0.275686	0.782789	0.275686	0.782789	14	14	0.803613		206	229	86	-0.829228	0.406976	-0.829228	0.406976	15	14	0.425262		232	203	98	0.30551	0.759982	0.30551	0.759982	15	14	0.779995		243	192	87
974.052	10266.4	0.120767	221	214	101	-0.17457	0.861414	-0.17457	0.861414	15	14	0.880478		206	200	95	0.137843	0.890365	0.137843	0.890365	14	14	0.910026		226	209	104	0.043644	0.965189	0.043644	0.965189	15	14	0.982865		259	176	71	1.48388	0.137841	1.48388	0.137841	15	14	0.145619		249	186	81
975.981	10246.1	0.121006	220	215	100	-0.21822	0.827259	-0.21822	0.827259	15	14	0.846694		184	222	79	-0.873006	0.382661	-0.873006	0.382661	14	14	0.401263		223	212	103	-0.087287	0.930443	-0.087287	0.930443	15	14	0.948623		263	172	67	1.65846	0.097226	1.65846	0.097226	15	14	0.102309		255	180	75
977.91	10225.9	0.121245	229	206	101	0.17457	0.861414	0.17457	0.861414	15	14	0.880478		202	204	97	-0.045948	0.963352	-0.045948	0.963352	14	14	0.981969		237	198	93	0.523723	0.600472	0.523723	0.600472	15	14	0.620867		249	186	81	1.04745	0.294895	1.04745	0.294895	15	14	0.310143		260	175	70
979.839	10205.8	0.121484	218	217	98	-0.30551	0.759982	-0.30551	0.759982	15	14	0.779995		194	212	89	-0.413529	0.679219	-0.413529	0.679219	14	14	0.700611		225	210	105	0	1	0	1	15	14	1.01713		237	198	93	0.52372	0.600472	0.52372	0.600472	15	14	0.620867		245	190	85
981.767	10185.7	0.121724	236	199	94	0.48008	0.631171	0.48008	0.631171	15	14	0.651619		219	187	82	0.735163	0.462241	0.735163	0.462241	14	14	0.482401		237	198	93	0.523723	0.600472	0.523723	0.600472	15	14	0.620867		258	177	72	1.44024	0.149801	1.44024	0.149801	15	14	0.158309		271	164	59
983.696	10165.7	0.121963	245	190	85	0.87287	0.382734	0.87287	0.382734	15	14	0.400494		219	187	82	0.735163	0.462241	0.735163	0.462241	14	14	0.482401		244	191	86	0.829228	0.406976	0.829228	0.406976	15	14	0.425262		257	178	73	1.39659	0.162537	1.39659	0.162537	15	14	0.171789		269	166	61
985.625	10145.8	0.122202	239	196	91	0.61101	0.541193	0.61101	0.541193	15	14	0.561291		217	189	84	0.643268	0.520051	0.643268	0.520051	14	14	0.540927		231	204	99	0.261861	0.793428	0.261861	0.793428	15	14	0.813179		248	187	82	1.0038	0.315475	1.0038	0.315475	15	14	0.331405		257	178	73
987.554	10126	0.122441	237	198	93	0.52372	0.600472	0.52372	0.600472	15	14	0.620867		221	185	80	0.827058	0.408205	0.827058	0.408205	14	14	0.427387		226	209	104	0.043644	0.965189	0.043644	0.965189	15	14	0.982865		260	175	70	1.52753	0.126631	1.52753	0.126631	15	14	0.1337		263	172	67
989.483	10106.3	0.12268	238	197	92	0.56737	0.570466	0.56737	0.570466	15	14	0.590745		213	193	88	0.459477	0.645892	0.459477	0.645892	14	14	0.667331		228	207	102	0.130931	0.89583	0.130931	0.89583	15	14	0.914475		255	180	75	1.30931	0.190431	1.30931	0.190431	15	14	0.201205		266	169	64
991.411	10086.6	0.122919	233	202	97	0.34915	0.726978	0.34915	0.726978	15	14	0.747192		214	192	87	0.505424	0.613261	0.505424	0.613261	14	14	0.634669		232	203	98	0.305505	0.759982	0.305505	0.759982	15	14	0.779995		252	183	78	1.17838	0.238647	1.17838	0.238647	15	14	0.251712		261	174	69
993.34	10067	0.123158	243	192	87	0.78558	0.432112	0.78558	0.432112	15	14	0.450872		221	185	80	0.827058	0.408205	0.827058	0.408205	14	14	0.427387		244	191	86	0.829228	0.406976	0.829228	0.406976	15	14	0.425262		264	171	66	1.7021	0.088738	1.7021	0.088738	15	14	0.093216		268	167	62
995.269	10047.5	0.123398	246	189	84	0.91652	0.359397	0.91652	0.359397	15	14	0.376588		224	182	77	0.964901	0.334595	0.964901	0.334595	14	14	0.35189		241	194	89	0.698297	0.484992	0.698297	0.484992	15	14	0.504539		268	167	62	1.87667	0.060564	1.87667	0.060564	15	14	0.062953		272	163	58
997.198	10028.1	0.123637	239	196	91	0.61101	0.541193	0.61101	0.541193	15	14	0.561291		225	181	76	1.01085	0.312089	1.01085	0.312089	14	14	0.328667		229	206	101	0.174574	0.861414	0.174574	0.861414	15	14	0.880478		266	169	64	1.78939	0.073553	1.78939	0.073553	15	14	0.076919		266	169	64
999.127	10008.7	0.123876	238	197	92	0.567367	0.570466	0.567367	0.570466	15	14	0.590745		227	179	74	1.10274	0.270139	1.10274	0.270139	14	14	0.285176		234	201	96	0.392792	0.694473	0.392792	0.694473	15	14	0.71483		258	177	72	1.44024	0.149801	1.44024	0.149801	15	14	0.158309		265	170	65
1001.06	9989.46	0.124115	246	189	84	0.916515	0.359397	0.916515	0.359397	15	14	0.376588		231	175	70	1.28653	0.198257	1.28653	0.198257	14	14	0.209978		246	189	84	0.916515	0.359397	0.916515	0.359397	15	14	0.376588		262	173	68	1.61481	0.106352	1.61481	0.106352	15	14	0.11207		273	162	57
1002.98	9970.25	0.124354	247	188	83	0.960159	0.336976	0.960159	0.336976	15	14	0.353554		228	178	73	1.14869	0.250684	1.14869	0.250684	14	14	0.26491		243	192	87	0.785584	0.432112	0.785584	0.432112	15	14	0.450872		263	172	67	1.65846	0.097226	1.65846	0.097226	15	14	0.102309		275	160	55
1004.91	9951.11	0.124593	246	189	84	0.916515	0.359397	0.916515	0.359397	15	14	0.376588		227	179	74	1.10274	0.270139	1.10274	0.270139	14	14	0.285176		238	197	92	0.567367	0.570466	0.567367	0.570466	15	14	0.590745		263	172	67	1.65846	0.097226	1.65846	0.097226	15	14	0.102309		270	165	60
1006.84	9932.05	0.124832	247	188	83	0.960159	0.336976	0.960159	0.336976	15	14	0.353554		230	176	71	1.24059	0.214759	1.24059	0.214759	14	14	0.227321		239	196	91	0.61101	0.541193	0.61101	0.541193	15	14	0.561291		264	171	66	1.7021	0.088738	1.7021	0.088738	15	14	0.093216		273	162	57
1008.77	9913.05	0.125072	250	185	80	1.09109	0.275234	1.09109	0.275234	15	14	0.289776		232	174	69	1.33248	0.182703	1.33248	0.182703	14	14	0.193579		237	198	93	0.523723	0.600472	0.523723	0.600472	15	14	0.620867		264	171	66	1.7021	0.088738	1.7021	0.088738	15	14	0.093216		272	163	58
1010.7	9894.14	0.125311	245	190	85	0.872872	0.382734	0.872872	0.382734	15	14	0.400494		226	180	75	1.0568	0.290605	1.0568	0.290605	14	14	0.306426		234	201	96	0.392792	0.694473	0.392792	0.694473	15	14	0.71483		261	174	69	1.57117	0.116144	1.57117	0.116144	15	14	0.122524		270	165	60
1012.63	9875.29	0.12555	241	194	89	0.698297	0.484992	0.698297	0.484992	15	14	0.504539		226	180	75	1.0568	0.290605	1.0568	0.290605	14	14	0.306426		233	202	97	0.349149	0.726978	0.349149	0.726978	15	14	0.747192		258	177	72	1.44024	0.149801	1.44024	0.149801	15	14	0.158309		266	169	64
1014.56	9856.52	0.125789	241	194	89	0.698297	0.484992	0.698297	0.484992	15	14	0.504539		231	175	70	1.28653	0.198257	1.28653	0.198257	14	14	0.209978		233	202	97	0.349149	0.726978	0.349149	0.726978	15	14	0.747192		259	176	71	1.48388	0.137841	1.48388	0.137841	15	14	0.145619		268	167	62
1016.49	9837.81	0.126028	244	191	86	0.829228	0.406976	0.829228	0.406976	15	14	0.425262		231	175	70	1.28653	0.198257	1.28653	0.198257	14	14	0.209978		235	200	95	0.436436	0.662521	0.436436	0.662521	15	14	0.682954		260	175	70	1.52753	0.126631	1.52753	0.126631	15	14	0.1337		270	165	60
1018.41	9819.18	0.126267	242	193	88	0.741941	0.458124	0.741941	0.458124	15	14	0.477307		230	176	71	1.24059	0.214759	1.24059	0.214759	14	14	0.227321		233	202	97	0.349149	0.726978	0.349149	0.726978	15	14	0.747192		261	174	69	1.57117	0.116144	1.57117	0.116144	15	14	0.122524		269	166	61
1020.34	9800.62	0.126506	244	191	86	0.829228	0.406976	0.829228	0.406976	15	14	0.425262		231	175	70	1.28653	0.198257	1.28653	0.198257	14	14	0.209978		232	203	98	0.305505	0.759982	0.305505	0.759982	15	14	0.779995		258	177	72	1.44024	0.149801	1.44024	0.149801	15	14	0.158309		271	164	59
1022.27	9782.13	0.126746	247	188	83	0.960159	0.336976	0.960159	0.336976	15	14	0.353554		230	176	71	1.24059	0.214759	1.24059	0.214759	14	14	0.227321		236	199	94	0.480079	0.631171	0.480079	0.631171	15	14	0.651619		262	173	68	1.61481	0.106352	1.61481	0.106352	15	14	0.11207		273	162	57
1024.2	9763.71	0.126985	244	191	86	0.829228	0.406976	0.829228	0.406976	15	14	0.425262		231	175	70	1.28653	0.198257	1.28653	0.198257	14	14	0.209978		241	194	89	0.698297	0.484992	0.698297	0.484992	15	14	0.504539		262	173	68	1.61481	0.106352	1.61481	0.106352	15	14	0.11207		272	163	58
1026.13	9745.35	0.127224	245	190	85	0.872872	0.382734	0.872872	0.382734	15	14	0.400494		232	174	69	1.33248	0.182703	1.33248	0.182703	14	14	0.193579		238	197	92	0.567367	0.570466	0.567367	0.570466	15	14	0.590745		260	175	70	1.52753	0.126631	1.52753	0.126631	15	14	0.1337		271	164	59
1028.06	9727.07	0.127463	243	192	87	0.785584	0.432112	0.785584	0.432112	15	14	0.450872		232	174	69	1.33248	0.182703	1.33248	0.182703	14	14	0.193579		235	200	95	0.436436	0.662521	0.436436	0.662521	15	14	0.682954		257	178	73	1.39659	0.162537	1.39659	0.162537	15	14	0.171789		267	168	63
1029.99	9708.85	0.127702	244	191	86	0.829228	0.406976	0.829228	0.406976	15	14	0.425262		230	176	71	1.24059	0.214759	1.24059	0.214759	14	14	0.227321		232	203	98	0.305505	0.759982	0.305505	0.759982	15	14	0.779995		258	177	72	1.44024	0.149801	1.44024	0.149801	15	14	0.158309		269	166	61
1031.92	9690.71	0.127941	246	189	84	0.916515	0.359397	0.916515	0.359397	15	14	0.376588		232	174	69	1.33248	0.182703	1.33248	0.182703	14	14	0.193579		232	203	98	0.305505	0.759982	0.305505	0.759982	15	14	0.779995		261	174	69	1.57117	0.116144	1.57117	0.116144	15	14	0.122524		269	166	61
1033.85	9672.63	0.12818	243	192	87	0.785584	0.432112	0.785584	0.432112	15	14	0.450872		230	176	71	1.24059	0.214759	1.24059	0.214759	14	14	0.227321		234	201	96	0.392792	0.694473	0.392792	0.694473	15	14	0.71483		258	177	72	1.44024	0.149801	1.44024	0.149801	15	14	0.158309		268	167	62
1035.77	9654.61	0.12842	242	193	88	0.741941	0.458124	0.741941	0.458124	15	14	0.477307		230	176	71	1.24059	0.214759	1.24059	0.214759	14	14	0.227321		234	201	96	0.392792	0.694473	0.392792	0.694473	15	14	0.71483		258	177	72	1.44024	0.149801	1.44024	0.149801	15	14	0.158309		268	167	62
1037.7	9636.67	0.128659	239	196	91	0.61101	0.541193	0.61101	0.541193	15	14	0.561291		229	177	72	1.19464	0.232229	1.19464	0.232229	14	14	0.24563		232	203	98	0.305505	0.759982	0.305505	0.759982	15	14	0.779995		258	177	72	1.44024	0.149801	1.44024	0.149801	15	14	0.158309		265	170	65
1039.63	9618.79	0.128898	240	195	90	0.654654	0.512691	0.654654	0.512691	15	14	0.532545		229	177	72	1.19464	0.232229	1.19464	0.232229	14	14	0.24563		232	203	98	0.305505	0.759982	0.305505	0.759982	15	14	0.779995		257	178	73	1.39659	0.162537	1.39659	0.162537	15	14	0.171789		267	168	63
1041.56	9600.98	0.129137	240	195	90	0.654654	0.512691	0.654654	0.512691	15	14	0.532545		229	177	72	1.19464	0.232229	1.19464	0.232229	14	14	0.24563		234	201	96	0.392792	0.694473	0.392792	0.694473	15	14	0.71483		256	179	74	1.35295	0.176072	1.35295	0.176072	15	14	0.186083		272	163	58
1043.49	9583.23	0.129376	239	196	91	0.61101	0.541193	0.61101	0.541193	15	14	0.561291		230	176	71	1.24059	0.214759	1.24059	0.214759	14	14	0.227321		234	201	96	0.392792	0.694473	0.392792	0.694473	15	14	0.71483		260	175	70	1.52753	0.126631	1.52753	0.126631	15	14	0.1337		271	164	59
1045.42	9565.55	0.129615	244	191	86	0.829228	0.406976	0.829228	0.406976	15	14	0.425262		230	176	71	1.24059	0.214759	1.24059	0.214759	14	14	0.227321		232	203	98	0.305505	0.759982	0.305505	0.759982	15	14	0.779995		262	173	68	1.61481	0.106352	1.61481	0.106352	15	14	0.11207		269	166	61
1047.35	9547.93	0.129854	245	190	85	0.872872	0.382734	0.872872	0.382734	15	14	0.400494		231	175	70	1.28653	0.198257	1.28653	0.198257	14	14	0.209978		233	202	97	0.349149	0.726978	0.349149	0.726978	15	14	0.747192		260	175	70	1.52753	0.126631	1.52753	0.126631	15	14	0.1337		269	166	61
1049.28	9530.38	0.130094	244	191	86	0.829228	0.406976	0.829228	0.406976	15	14	0.425262		229	177	72	1.19464	0.232229	1.19464	0.232229	14	14	0.24563		233	202	97	0.349149	0.726978	0.349149	0.726978	15	14	0.747192		257	178	73	1.39659	0.162537	1.39659	0.162537	15	14	0.171789		269	166	61
1051.2	9512.89	0.130333	243	192	87	0.785584	0.432112	0.785584	0.432112	15	14	0.450872		229	177	72	1.19464	0.232229	1.19464	0.232229	14	14	0.24563		233	202	97	0.349149	0.726978	0.349149	0.726978	15	14	0.747192		258	177	72	1.44024	0.149801	1.44024	0.149801	15	14	0.158309		269	166	61
1053.13	9495.47	0.130572	241	194	89	0.698297	0.484992	0.698297	0.484992	15	14	0.504539		230	176	71	1.24059	0.214759	1.24059	0.214759	14	14	0.227321		233	202	97	0.349149	0.726978	0.349149	0.726978	15	14	0.747192		260	175	70	1.52753	0.126631	1.52753	0.126631	15	14	0.1337		269	166	61
1055.06	9478.11	0.130811	242	193	88	0.741941	0.458124	0.741941	0.458124	15	14	0.477307		230	176	71	1.24059	0.214759	1.24059	0.214759	14	14	0.227321		233	202	97	0.349149	0.726978	0.349149	0.726978	15	14	0.747192		260	175	70	1.52753	0.126631	1.52753	0.126631	15	14	0.1337		269	166	61
1056.99	9460.82	0.13105	244	191	86	0.829228	0.406976	0.829228	0.406976	15	14	0.425262		232	174	69	1.33248	0.182703	1.33248	0.182703	14	14	0.193579		233	202	97	0.349149	0.726978	0.349149	0.726978	15	14	0.747192		259	176	71	1.48388	0.137841	1.48388	0.137841	15	14	0.145619		269	166	61
1058.92	9443.58	0.131289	242	193	88	0.741941	0.458124	0.741941	0.458124	15	14	0.477307		232	174	69	1.33248	0.182703	1.33248	0.182703	14	14	0.193579		232	203	98	0.305505	0.759982	0.305505	0.759982	15	14	0.779995		260	175	70	1.52753	0.126631	1.52753	0.126631	15	14	0.1337		269	166	61
1060.85	9426.41	0.131528	239	196	91	0.61101	0.541193	0.61101	0.541193	15	14	0.561291		232	174	69	1.33248	0.182703	1.33248	0.182703	14	14	0.193579		233	202	97	0.349149	0.726978	0.349149	0.726978	15	14	0.747192		260	175	70	1.52753	0.126631	1.52753	0.126631	15	14	0.1337		269	166	61
1062.78	9409.31	0.131768	241	194	89	0.698297	0.484992	0.698297	0.484992	15	14	0.504539		231	175	70	1.28653	0.198257	1.28653	0.198257	14	14	0.209978		233	202	97	0.349149	0.726978	0.349149	0.726978	15	14	0.747192		256	179	74	1.35295	0.176072	1.35295	0.176072	15	14	0.186083		268	167	62
1064.71	9392.26	0.132007	240	195	90	0.654654	0.512691	0.654654	0.512691	15	14	0.532545		230	176	71	1.24059	0.214759	1.24059	0.214759	14	14	0.227321		232	203	98	0.305505	0.759982	0.305505	0.759982	15	14	0.779995		258	177	72	1.44024	0.149801	1.44024	0.149801	15	14	0.158309		269	166	61
1066.64	9375.28	0.132246	240	195	90	0.654654	0.512691	0.654654	0.512691	15	14	0.532545		230	176	71	1.24059	0.214759	1.24059	0.214759	14	14	0.227321		232	203	98	0.305505	0.759982	0.305505	0.759982	15	14	0.779995		259	176	71	1.48388	0.137841	1.48388	0.137841	15	14	0.145619		269	166	61
1068.56	9358.35	0.132485	241	194	89	0.698297	0.484992	0.698297	0.484992	15	14	0.504539		233	173	68	1.37843	0.168071	1.37843	0.168071	14	14	0.178112		233	202	97	0.349149	0.726978	0.349149	0.726978	15	14	0.747192		260	175	70	1.52753	0.126631	1.52753	0.126631	15	14	0.1337		269	166	61
1070.49	9341.49	0.132724	242	193	88	0.741941	0.458124	0.741941	0.458124	15	14	0.477307		230	176	71	1.24059	0.214759	1.24059	0.214759	14	14	0.227321		233	202	97	0.349149	0.726978	0.349149	0.726978	15	14	0.747192		259	176	71	1.48388	0.137841	1.48388	0.137841	15	14	0.145619		269	166	61
1072.42	9324.69	0.132963	241	194	89	0.698297	0.484992	0.698297	0.484992	15	14	0.504539		230	176	71	1.24059	0.214759	1.24059	0.214759	14	14	0.227321		232	203	98	0.305505	0.759982	0.305505	0.759982	15	14	0.779995		259	176	71	1.48388	0.137841	1.48388	0.137841	15	14	0.145619		269	166	61
1074.35	9307.95	0.133202	242	193	88	0.741941	0.458124	0.741941	0.458124	15	14	0.477307		231	175	70	1.28653	0.198257	1.28653	0.198257	14	14	0.209978		232	203	98	0.305505	0.759982	0.305505	0.759982	15	14	0.779995		259	176	71	1.48388	0.137841	1.48388	0.137841	15	14	0.145619		269	166	61
1076.28	9291.27	0.133442	241	194	89	0.698297	0.484992	0.698297	0.484992	15	14	0.504539		232	174	69	1.33248	0.182703	1.33248	0.182703	14	14	0.193579		232	203	98	0.305505	0.759982	0.305505	0.759982	15	14	0.779995		260	175	70	1.52753	0.126631	1.52753	0.126631	15	14	0.1337		269	166	61
1078.21	9274.65	0.133681	241	194	89	0.698297	0.484992	0.698297	0.484992	15	14	0.504539		231	175	70	1.28653	0.198257	1.28653	0.198257	14	14	0.209978		232	203	98	0.305505	0.759982	0.305505	0.759982	15	14	0.779995		260	175	70	1.52753	0.126631	1.52753	0.126631	15	14	0.1337		269	166	61
1080.14	9258.09	0.13392	241	194	89	0.698297	0.484992	0.698297	0.484992	15	14	0.504539		230	176	71	1.24059	0.214759	1.24059	0.214759	14	14	0.227321		232	203	98	0.305505	0.759982	0.305505	0.759982	15	14	0.779995		258	177	72	1.44024	0.149801	1.44024	0.149801	15	14	0.158309		269	166	61
1082.07	9241.58	0.134159	241	194	89	0.698297	0.484992	0.698297	0.484992	15	14	0.504539		230	176	71	1.24059	0.214759	1.24059	0.214759	14	14	0.227321		233	202	97	0.349149	0.726978	0.349149	0.726978	15	14	0.747192		259	176	71	1.48388	0.137841	1.48388	0.137841	15	14	0.145619		270	165	60
1083.99	9225.14	0.134398	241	194	89	0.698297	0.484992	0.698297	0.484992	15	14	0.504539		231	175	70	1.28653	0.198257	1.28653	0.198257	14	14	0.209978		233	202	97	0.349149	0.726978	0.349149	0.726978	15	14	0.747192		260	175	70	1.52753	0.126631	1.52753	0.126631	15	14	0.1337		270	165	60
1085.92	9208.75	0.134637	242	193	88	0.741941	0.458124	0.741941	0.458124	15	14	0.477307		232	174	69	1.33248	0.182703	1.33248	0.182703	14	14	0.193579		232	203	98	0.305505	0.759982	0.305505	0.759982	15	14	0.779995		259	176	71	1.48388	0.137841	1.48388	0.137841	15	14	0.145619		269	166	61
1087.85	9192.43	0.134876	242	193	88	0.741941	0.458124	0.741941	0.458124	15	14	0.477307		232	174	69	1.33248	0.182703	1.33248	0.182703	14	14	0.193579		234	201	96	0.392792	0.694473	0.392792	0.694473	15	14	0.71483		259	176	71	1.48388	0.137841	1.48388	0.137841	15	14	0.145619		270	165	60
1089.78	9176.16	0.135116	241	194	89	0.698297	0.484992	0.698297	0.484992	15	14	0.504539		232	174	69	1.33248	0.182703	1.33248	0.182703	14	14	0.193579		234	201	96	0.392792	0.694473	0.392792	0.694473	15	14	0.71483		260	175	70	1.52753	0.126631	1.52753	0.126631	15	14	0.1337		269	166	61
1091.71	9159.94	0.135355	240	195	90	0.654654	0.512691	0.654654	0.512691	15	14	0.532545		232	174	69	1.33248	0.182703	1.33248	0.182703	14	14	0.193579		232	203	98	0.305505	0.759982	0.305505	0.759982	15	14	0.779995		258	177	72	1.44024	0.149801	1.44024	0.149801	15	14	0.158309		270	165	60
1093.64	9143.79	0.135594	245	190	85	0.872872	0.382734	0.872872	0.382734	15	14	0.400494		232	174	69	1.33248	0.182703	1.33248	0.182703	14	14	0.193579		232	203	98	0.305505	0.759982	0.305505	0.759982	15	14	0.779995		258	177	72	1.44024	0.149801	1.44024	0.149801	15	14	0.158309		270	165	60
1095.57	9127.69	0.135833	244	191	86	0.829228	0.406976	0.829228	0.406976	15	14	0.425262		231	175	70	1.28653	0.198257	1.28653	0.198257	14	14	0.209978		232	203	98	0.305505	0.759982	0.305505	0.759982	15	14	0.779995		259	176	71	1.48388	0.137841	1.48388	0.137841	15	14	0.145619		270	165	60
1097.5	9111.65	0.136072	242	193	88	0.741941	0.458124	0.741941	0.458124	15	14	0.477307		231	175	70	1.28653	0.198257	1.28653	0.198257	14	14	0.209978		232	203	98	0.305505	0.759982	0.305505	0.759982	15	14	0.779995		259	176	71	1.48388	0.137841	1.48388	0.137841	15	14	0.145619		270	165	60
1099.43	9095.66	0.136311	242	193	88	0.741941	0.458124	0.741941	0.458124	15	14	0.477307		231	175	70	1.28653	0.198257	1.28653	0.198257	14	14	0.209978		232	203	98	0.305505	0.759982	0.305505	0.759982	15	14	0.779995		258	177	72	1.44024	0.149801	1.44024	0.149801	15	14	0.158309		271	164	59
1101.35	9079.73	0.13655	242	193	88	0.741941	0.458124	0.741941	0.458124	15	14	0.477307		231	175	70	1.28653	0.198257	1.28653	0.198257	14	14	0.209978		232	203	98	0.305505	0.759982	0.305505	0.759982	15	14	0.779995		258	177	72	1.44024	0.149801	1.44024	0.149801	15	14	0.158309		271	164	59
1103.28	9063.86	0.13679	241	194	89	0.698297	0.484992	0.698297	0.484992	15	14	0.504539		230	176	71	1.24059	0.214759	1.24059	0.214759	14	14	0.227321		232	203	98	0.305505	0.759982	0.305505	0.759982	15	14	0.779995		259	176	71	1.48388	0.137841	1.48388	0.137841	15	14	0.145619		269	166	61
1105.21	9048.04	0.137029	243	192	87	0.785584	0.432112	0.785584	0.432112	15	14	0.450872		230	176	71	1.24059	0.214759	1.24059	0.214759	14	14	0.227321		232	203	98	0.305505	0.759982	0.305505	0.759982	15	14	0.779995		259	176	71	1.48388	0.137841	1.48388	0.137841	15	14	0.145619		269	166	61
1107.14	9032.28	0.137268	243	192	87	0.785584	0.432112	0.785584	0.432112	15	14	0.450872		230	176	71	1.24059	0.214759	1.24059	0.214759	14	14	0.227321		232	203	98	0.305505	0.759982	0.305505	0.759982	15	14	0.779995		259	176	71	1.48388	0.137841	1.48388	0.137841	15	14	0.145619		271	164	59
1109.07	9016.57	0.137507	245	190	85	0.872872	0.382734	0.872872	0.382734	15	14	0.400494		231	175	70	1.28653	0.198257	1.28653	0.198257	14	14	0.209978		232	203	98	0.305505	0.759982	0.305505	0.759982	15	14	0.779995		259	176	71	1.48388	0.137841	1.48388	0.137841	15	14	0.145619		270	165	60
1111	9000.92	0.137746	242	193	88	0.741941	0.458124	0.741941	0.458124	15	14	0.477307		232	174	69	1.33248	0.182703	1.33248	0.182703	14	14	0.193579		233	202	97	0.349149	0.726978	0.349149	0.726978	15	14	0.747192		259	176	71	1.48388	0.137841	1.48388	0.137841	15	14	0.145619		270	165	60
1112.93	8985.32	0.137985	242	193	88	0.741941	0.458124	0.741941	0.458124	15	14	0.477307		232	174	69	1.33248	0.182703	1.33248	0.182703	14	14	0.193579		233	202	97	0.349149	0.726978	0.349149	0.726978	15	14	0.747192		258	177	72	1.44024	0.149801	1.44024	0.149801	15	14	0.158309		270	165	60
1114.86	8969.77	0.138224	242	193	88	0.741941	0.458124	0.741941	0.458124	15	14	0.477307		231	175	70	1.28653	0.198257	1.28653	0.198257	14	14	0.209978		232	203	98	0.305505	0.759982	0.305505	0.759982	15	14	0.779995		258	177	72	1.44024	0.149801	1.44024	0.149801	15	14	0.158309		270	165	60
1116.78	8954.28	0.138464	244	191	86	0.829228	0.406976	0.829228	0.406976	15	14	0.425262		231	175	70	1.28653	0.198257	1.28653	0.198257	14	14	0.209978		232	203	98	0.305505	0.759982	0.305505	0.759982	15	14	0.779995		259	176	71	1.48388	0.137841	1.48388	0.137841	15	14	0.145619		269	166	61
1118.71	8938.84	0.138703	243	192	87	0.785584	0.432112	0.785584	0.432112	15	14	0.450872		231	175	70	1.28653	0.198257	1.28653	0.198257	14	14	0.209978		232	203	98	0.305505	0.759982	0.305505	0.759982	15	14	0.779995		259	176	71	1.48388	0.137841	1.48388	0.137841	15	14	0.145619		269	166	61
1120.64	8923.46	0.138942	243	192	87	0.785584	0.432112	0.785584	0.432112	15	14	0.450872		231	175	70	1.28653	0.198257	1.28653	0.198257	14	14	0.209978		233	202	97	0.349149	0.726978	0.349149	0.726978	15	14	0.747192		259	176	71	1.48388	0.137841	1.48388	0.137841	15	14	0.145619		270	165	60
1122.57	8908.12	0.139181	241	194	89	0.698297	0.484992	0.698297	0.484992	15	14	0.504539		231	175	70	1.28653	0.198257	1.28653	0.198257	14	14	0.209978		233	202	97	0.349149	0.726978	0.349149	0.726978	15	14	0.747192		259	176	71	1.48388	0.137841	1.48388	0.137841	15	14	0.145619		271	164	59
1124.5	8892.84	0.13942	242	193	88	0.741941	0.458124	0.741941	0.458124	15	14	0.477307		231	175	70	1.28653	0.198257	1.28653	0.198257	14	14	0.209978		232	203	98	0.305505	0.759982	0.305505	0.759982	15	14	0.779995		259	176	71	1.48388	0.137841	1.48388	0.137841	15	14	0.145619		269	166	61
1126.43	8877.62	0.139659	243	192	87	0.785584	0.432112	0.785584	0.432112	15	14	0.450872		230	176	71	1.24059	0.214759	1.24059	0.214759	14	14	0.227321		232	203	98	0.305505	0.759982	0.305505	0.759982	15	14	0.779995		259	176	71	1.48388	0.137841	1.48388	0.137841	15	14	0.145619		269	166	61
1128.36	8862.44	0.139898	244	191	86	0.829228	0.406976	0.829228	0.406976	15	14	0.425262		232	174	69	1.33248	0.182703	1.33248	0.182703	14	14	0.193579		233	202	97	0.349149	0.726978	0.349149	0.726978	15	14	0.747192		259	176	71	1.48388	0.137841	1.48388	0.137841	15	14	0.145619		269	166	61
1130.29	8847.32	0.140138	243	192	87	0.785584	0.432112	0.785584	0.432112	15	14	0.450872		232	174	69	1.33248	0.182703	1.33248	0.182703	14	14	0.193579		233	202	97	0.349149	0.726978	0.349149	0.726978	15	14	0.747192		259	176	71	1.48388	0.137841	1.48388	0.137841	15	14	0.145619		270	165	60
1132.21	8832.24	0.140377	243	192	87	0.785584	0.432112	0.785584	0.432112	15	14	0.450872		230	176	71	1.24059	0.214759	1.24059	0.214759	14	14	0.227321		233	202	97	0.349149	0.726978	0.349149	0.726978	15	14	0.747192		259	176	71	1.48388	0.137841	1.48388	0.137841	15	14	0.145619		269	166	61
1134.14	8817.22	0.140616	243	192	87	0.785584	0.432112	0.785584	0.432112	15	14	0.450872		231	175	70	1.28653	0.198257	1.28653	0.198257	14	14	0.209978		233	202	97	0.349149	0.726978	0.349149	0.726978	15	14	0.747192		259	176	71	1.48388	0.137841	1.48388	0.137841	15	14	0.145619		269	166	61
1136.07	8802.25	0.140855	243	192	87	0.785584	0.432112	0.785584	0.432112	15	14	0.450872		231	175	70	1.28653	0.198257	1.28653	0.198257	14	14	0.209978		233	202	97	0.349149	0.726978	0.349149	0.726978	15	14	0.747192		259	176	71	1.48388	0.137841	1.48388	0.137841	15	14	0.145619		270	165	60
1138	8787.34	0.141094	243	192	87	0.785584	0.432112	0.785584	0.432112	15	14	0.450872		232	174	69	1.33248	0.182703	1.33248	0.182703	14	14	0.193579		233	202	97	0.349149	0.726978	0.349149	0.726978	15	14	0.747192		259	176	71	1.48388	0.137841	1.48388	0.137841	15	14	0.145619		270	165	60
1139.93	8772.47	0.141333	243	192	87	0.785584	0.432112	0.785584	0.432112	15	14	0.450872		232	174	69	1.33248	0.182703	1.33248	0.182703	14	14	0.193579		233	202	97	0.349149	0.726978	0.349149	0.726978	15	14	0.747192		259	176	71	1.48388	0.137841	1.48388	0.137841	15	14	0.145619		270	165	60
1141.86	8757.65	0.141572	243	192	87	0.785584	0.432112	0.785584	0.432112	15	14	0.450872		231	175	70	1.28653	0.198257	1.28653	0.198257	14	14	0.209978		233	202	97	0.349149	0.726978	0.349149	0.726978	15	14	0.747192		259	176	71	1.48388	0.137841	1.48388	0.137841	15	14	0.145619		270	165	60
1143.79	8742.88	0.141812	243	192	87	0.785584	0.432112	0.785584	0.432112	15	14	0.450872		231	175	70	1.28653	0.198257	1.28653	0.198257	14	14	0.209978		233	202	97	0.349149	0.726978	0.349149	0.726978	15	14	0.747192		259	176	71	1.48388	0.137841	1.48388	0.137841	15	14	0.145619		270	165	60
1145.72	8728.16	0.142051	243	192	87	0.785584	0.432112	0.785584	0.432112	15	14	0.450872		230	176	71	1.24059	0.214759	1.24059	0.214759	14	14	0.227321		233	202	97	0.349149	0.726978	0.349149	0.726978	15	14	0.747192		259	176	71	1.48388	0.137841	1.48388	0.137841	15	14	0.145619		269	166	61
1147.65	8713.49	0.14229	244	191	86	0.829228	0.406976	0.829228	0.406976	15	14	0.425262		230	176	71	1.24059	0.214759	1.24059	0.214759	14	14	0.227321		233	202	97	0.349149	0.726978	0.349149	0.726978	15	14	0.747192		258	177	72	1.44024	0.149801	1.44024	0.149801	15	14	0.158309		269	166	61
1149.57	8698.87	0.142529	244	191	86	0.829228	0.406976	0.829228	0.406976	15	14	0.425262		230	176	71	1.24059	0.214759	1.24059	0.214759	14	14	0.227321		233	202	97	0.349149	0.726978	0.349149	0.726978	15	14	0.747192		258	177	72	1.44024	0.149801	1.44024	0.149801	15	14	0.158309		269	166	61
1151.5	8684.3	0.142768	243	192	87	0.785584	0.432112	0.785584	0.432112	15	14	0.450872		231	175	70	1.28653	0.198257	1.28653	0.198257	14	14	0.209978		233	202	97	0.349149	0.726978	0.349149	0.726978	15	14	0.747192		258	177	72	1.44024	0.149801	1.44024	0.149801	15	14	0.158309		270	165	60
1153.43	8669.78	0.143007	243	192	87	0.785584	0.432112	0.785584	0.432112	15	14	0.450872		231	175	70	1.28653	0.198257	1.28653	0.198257	14	14	0.209978		233	202	97	0.349149	0.726978	0.349149	0.726978	15	14	0.747192		258	177	72	1.44024	0.149801	1.44024	0.149801	15	14	0.158309		270	165	60
1155.36	8655.31	0.143246	243	192	87	0.785584	0.432112	0.785584	0.432112	15	14	0.450872		231	175	70	1.28653	0.198257	1.28653	0.198257	14	14	0.209978		233	202	97	0.349149	0.726978	0.349149	0.726978	15	14	0.747192		258	177	72	1.44024	0.149801	1.44024	0.149801	15	14	0.158309		269	166	61
1157.29	8640.88	0.143486	243	192	87	0.785584	0.432112	0.785584	0.432112	15	14	0.450872		230	176	71	1.24059	0.214759	1.24059	0.214759	14	14	0.227321		233	202	97	0.349149	0.726978	0.349149	0.726978	15	14	0.747192		258	177	72	1.44024	0.149801	1.44024	0.149801	15	14	0.158309		269	166	61
1159.22	8626.5	0.143725	243	192	87	0.785584	0.432112	0.785584	0.432112	15	14	0.450872		230	176	71	1.24059	0.214759	1.24059	0.214759	14	14	0.227321		232	203	98	0.305505	0.759982	0.305505	0.759982	15	14	0.779995		258	177	72	1.44024	0.149801	1.44024	0.149801	15	14	0.158309		268	167	62
1161.15	8612.17	0.143964	243	192	87	0.785584	0.432112	0.785584	0.432112	15	14	0.450872		229	177	72	1.19464	0.232229	1.19464	0.232229	14	14	0.24563		232	203	98	0.305505	0.759982	0.305505	0.759982	15	14	0.779995		258	177	72	1.44024	0.149801	1.44024	0.149801	15	14	0.158309		269	166	61
1163.08	8597.89	0.144203	243	192	87	0.785584	0.432112	0.785584	0.432112	15	14	0.450872		230	176	71	1.24059	0.214759	1.24059	0.214759	14	14	0.227321		233	202	97	0.349149	0.726978	0.349149	0.726978	15	14	0.747192		258	177	72	1.44024	0.149801	1.44024	0.149801	15	14	0.158309		269	166	61
1165	8583.66	0.144442	244	191	86	0.829228	0.406976	0.829228	0.406976	15	14	0.425262		231	175	70	1.28653	0.198257	1.28653	0.198257	14	14	0.209978		232	203	98	0.305505	0.759982	0.305505	0.759982	15	14	0.779995		258	177	72	1.44024	0.149801	1.44024	0.149801	15	14	0.158309		269	166	61
1166.93	8569.47	0.144681	244	191	86	0.829228	0.406976	0.829228	0.406976	15	14	0.425262		230	176	71	1.24059	0.214759	1.24059	0.214759	14	14	0.227321		232	203	98	0.305505	0.759982	0.305505	0.759982	15	14	0.779995		258	177	72	1.44024	0.149801	1.44024	0.149801	15	14	0.158309		269	166	61
1168.86	8555.33	0.14492	244	191	86	0.829228	0.406976	0.829228	0.406976	15	14	0.425262		229	177	72	1.19464	0.232229	1.19464	0.232229	14	14	0.24563		232	203	98	0.305505	0.759982	0.305505	0.759982	15	14	0.779995		257	178	73	1.39659	0.162537	1.39659	0.162537	15	14	0.171789		269	166	61
1170.79	8541.23	0.14516	243	192	87	0.785584	0.432112	0.785584	0.432112	15	14	0.450872		228	178	73	1.14869	0.250684	1.14869	0.250684	14	14	0.26491		232	203	98	0.305505	0.759982	0.305505	0.759982	15	14	0.779995		258	177	72	1.44024	0.149801	1.44024	0.149801	15	14	0.158309		269	166	61
1172.72	8527.18	0.145399	243	192	87	0.785584	0.432112	0.785584	0.432112	15	14	0.450872		230	176	71	1.24059	0.214759	1.24059	0.214759	14	14	0.227321		233	202	97	0.349149	0.726978	0.349149	0.726978	15	14	0.747192		258	177	72	1.44024	0.149801	1.44024	0.149801	15	14	0.158309		269	166	61
1174.65	8513.18	0.145638	243	192	87	0.785584	0.432112	0.785584	0.432112	15	14	0.450872		230	176	71	1.24059	0.214759	1.24059	0.214759	14	14	0.227321		232	203	98	0.305505	0.759982	0.305505	0.759982	15	14	0.779995		257	178	73	1.39659	0.162537	1.39659	0.162537	15	14	0.171789		269	166	61
1176.58	8499.23	0.145877	243	192	87	0.785584	0.432112	0.785584	0.432112	15	14	0.450872		229	177	72	1.19464	0.232229	1.19464	0.232229	14	14	0.24563		232	203	98	0.305505	0.759982	0.305505	0.759982	15	14	0.779995		258	177	72	1.44024	0.149801	1.44024	0.149801	15	14	0.158309		269	166	61
1178.51	8485.32	0.146116	243	192	87	0.785584	0.432112	0.785584	0.432112	15	14	0.450872		230	176	71	1.24059	0.214759	1.24059	0.214759	14	14	0.227321		232	203	98	0.305505	0.759982	0.305505	0.759982	15	14	0.779995		257	178	73	1.39659	0.162537	1.39659	0.162537	15	14	0.171789		268	167	62
1180.44	8471.45	0.146355	243	192	87	0.785584	0.432112	0.785584	0.432112	15	14	0.450872		231	175	70	1.28653	0.198257	1.28653	0.198257	14	14	0.209978		232	203	98	0.305505	0.759982	0.305505	0.759982	15	14	0.779995		257	178	73	1.39659	0.162537	1.39659	0.162537	15	14	0.171789		268	167	62
1182.36	8457.63	0.146594	243	192	87	0.785584	0.432112	0.785584	0.432112	15	14	0.450872		229	177	72	1.19464	0.232229	1.19464	0.232229	14	14	0.24563		232	203	98	0.305505	0.759982	0.305505	0.759982	15	14	0.779995		257	178	73	1.39659	0.162537	1.39659	0.162537	15	14	0.171789		268	167	62
1184.29	8443.86	0.146834	243	192	87	0.785584	0.432112	0.785584	0.432112	15	14	0.450872		229	177	72	1.19464	0.232229	1.19464	0.232229	14	14	0.24563		232	203	98	0.305505	0.759982	0.305505	0.759982	15	14	0.779995		258	177	72	1.44024	0.149801	1.44024	0.149801	15	14	0.158309		269	166	61
1186.22	8430.13	0.147073	244	191	86	0.829228	0.406976	0.829228	0.406976	15	14	0.425262		228	178	73	1.14869	0.250684	1.14869	0.250684	14	14	0.26491		233	202	97	0.349149	0.726978	0.349149	0.726978	15	14	0.747192		258	177	72	1.44024	0.149801	1.44024	0.149801	15	14	0.158309		269	166	61
1188.15	8416.44	0.147312	243	192	87	0.785584	0.432112	0.785584	0.432112	15	14	0.450872		228	178	73	1.14869	0.250684	1.14869	0.250684	14	14	0.26491		231	204	99	0.261861	0.793428	0.261861	0.793428	15	14	0.813179		257	178	73	1.39659	0.162537	1.39659	0.162537	15	14	0.171789		268	167	62
1190.08	8402.8	0.147551	243	192	87	0.785584	0.432112	0.785584	0.432112	15	14	0.450872		228	178	73	1.14869	0.250684	1.14869	0.250684	14	14	0.26491		232	203	98	0.305505	0.759982	0.305505	0.759982	15	14	0.779995		256	179	74	1.35295	0.176072	1.35295	0.176072	15	14	0.186083		268	167	62
1192.01	8389.2	0.14779	244	191	86	0.829228	0.406976	0.829228	0.406976	15	14	0.425262		229	177	72	1.19464	0.232229	1.19464	0.232229	14	14	0.24563		232	203	98	0.305505	0.759982	0.305505	0.759982	15	14	0.779995		257	178	73	1.39659	0.162537	1.39659	0.162537	15	14	0.171789		268	167	62
1193.94	8375.65	0.148029	243	192	87	0.785584	0.432112	0.785584	0.432112	15	14	0.450872		229	177	72	1.19464	0.232229	1.19464	0.232229	14	14	0.24563		233	202	97	0.349149	0.726978	0.349149	0.726978	15	14	0.747192		257	178	73	1.39659	0.162537	1.39659	0.162537	15	14	0.171789		267	168	63
1195.87	8362.14	0.148268	243	192	87	0.785584	0.432112	0.785584	0.432112	15	14	0.450872		228	178	73	1.14869	0.250684	1.14869	0.250684	14	14	0.26491		231	204	99	0.261861	0.793428	0.261861	0.793428	15	14	0.813179		257	178	73	1.39659	0.162537	1.39659	0.162537	15	14	0.171789		267	168	63
1197.79	8348.68	0.148508	243	192	87	0.785584	0.432112	0.785584	0.432112	15	14	0.450872		228	178	73	1.14869	0.250684	1.14869	0.250684	14	14	0.26491		231	204	99	0.261861	0.793428	0.261861	0.793428	15	14	0.813179		257	178	73	1.39659	0.162537	1.39659	0.162537	15	14	0.171789		267	168	63
1199.72	8335.25	0.148747	243	192	87	0.785584	0.432112	0.785584	0.432112	15	14	0.450872		228	178	73	1.14869	0.250684	1.14869	0.250684	14	14	0.26491		231	204	99	0.261861	0.793428	0.261861	0.793428	15	14	0.813179		256	179	74	1.35295	0.176072	1.35295	0.176072	15	14	0.186083		267	168	63
1201.65	8321.87	0.148986	243	192	87	0.785584	0.432112	0.785584	0.432112	15	14	0.450872		228	178	73	1.14869	0.250684	1.14869	0.250684	14	14	0.26491		231	204	99	0.261861	0.793428	0.261861	0.793428	15	14	0.813179		256	179	74	1.35295	0.176072	1.35295	0.176072	15	14	0.186083		267	168	63
1203.58	8308.54	0.149225	243	192	87	0.785584	0.432112	0.785584	0.432112	15	14	0.450872		228	178	73	1.14869	0.250684	1.14869	0.250684	14	14	0.26491		231	204	99	0.261861	0.793428	0.261861	0.793428	15	14	0.813179		256	179	74	1.35295	0.176072	1.35295	0.176072	15	14	0.186083		267	168	63
1205.51	8295.24	0.149464	243	192	87	0.785584	0.432112	0.785584	0.432112	15	14	0.450872		228	178	73	1.14869	0.250684	1.14869	0.250684	14	14	0.26491		232	203	98	0.305505	0.759982	0.305505	0.759982	15	14	0.779995		256	179	74	1.35295	0.176072	1.35295	0.176072	15	14	0.186083		267	168	63
1207.44	8281.99	0.149703	243	192	87	0.785584	0.432112	0.785584	0.432112	15	14	0.450872		228	178	73	1.14869	0.250684	1.14869	0.250684	14	14	0.26491		231	204	99	0.261861	0.793428	0.261861	0.793428	15	14	0.813179		256	179	74	1.35295	0.176072	1.35295	0.176072	15	14	0.186083		267	168	63
1209.37	8268.78	0.149942	243	192	87	0.785584	0.432112	0.785584	0.432112	15	14	0.450872		227	179	74	1.10274	0.270139	1.10274	0.270139	14	14	0.285176		231	204	99	0.261861	0.793428	0.261861	0.793428	15	14	0.813179		256	179	74	1.35295	0.176072	1.35295	0.176072	15	14	0.186083		267	168	63
1211.3	8255.62	0.150182	243	192	87	0.785584	0.432112	0.785584	0.432112	15	14	0.450872		227	179	74	1.10274	0.270139	1.10274	0.270139	14	14	0.285176		232	203	98	0.305505	0.759982	0.305505	0.759982	15	14	0.779995		256	179	74	1.35295	0.176072	1.35295	0.176072	15	14	0.186083		267	168	63
1213.23	8242.49	0.150421	243	192	87	0.785584	0.432112	0.785584	0.432112	15	14	0.450872		227	179	74	1.10274	0.270139	1.10274	0.270139	14	14	0.285176		232	203	98	0.305505	0.759982	0.305505	0.759982	15	14	0.779995		256	179	74	1.35295	0.176072	1.35295	0.176072	15	14	0.186083		267	168	63
1215.15	8229.41	0.15066	243	192	87	0.785584	0.432112	0.785584	0.432112	15	14	0.450872		228	178	73	1.14869	0.250684	1.14869	0.250684	14	14	0.26491		232	203	98	0.305505	0.759982	0.305505	0.759982	15	14	0.779995		256	179	74	1.35295	0.176072	1.35295	0.176072	15	14	0.186083		267	168	63
1217.08	8216.37	0.150899	243	192	87	0.785584	0.432112	0.785584	0.432112	15	14	0.450872		228	178	73	1.14869	0.250684	1.14869	0.250684	14	14	0.26491		231	204	99	0.261861	0.793428	0.261861	0.793428	15	14	0.813179		256	179	74	1.35295	0.176072	1.35295	0.176072	15	14	0.186083		267	168	63
1219.01	8203.37	0.151138	243	192	87	0.785584	0.432112	0.785584	0.432112	15	14	0.450872		228	178	73	1.14869	0.250684	1.14869	0.250684	14	14	0.26491		231	204	99	0.261861	0.793428	0.261861	0.793428	15	14	0.813179		255	180	75	1.30931	0.190431	1.30931	0.190431	15	14	0.201205		267	168	63
1220.94	8190.41	0.151377	243	192	87	0.785584	0.432112	0.785584	0.432112	15	14	0.450872		227	179	74	1.10274	0.270139	1.10274	0.270139	14	14	0.285176		231	204	99	0.261861	0.793428	0.261861	0.793428	15	14	0.813179		255	180	75	1.30931	0.190431	1.30931	0.190431	15	14	0.201205		267	168	63
1222.87	8177.49	0.151616	243	192	87	0.785584	0.432112	0.785584	0.432112	15	14	0.450872		227	179	74	1.10274	0.270139	1.10274	0.270139	14	14	0.285176		231	204	99	0.261861	0.793428	0.261861	0.793428	15	14	0.813179		255	180	75	1.30931	0.190431	1.30931	0.190431	15	14	0.201205		267	168	63
1224.8	8164.61	0.151856	243	192	87	0.785584	0.432112	0.785584	0.432112	15	14	0.450872		227	179	74	1.10274	0.270139	1.10274	0.270139	14	14	0.285176		232	203	98	0.305505	0.759982	0.305505	0.759982	15	14	0.779995		255	180	75	1.30931	0.190431	1.30931	0.190431	15	14	0.201205		267	168	63
1226.73	8151.77	0.152095	243	192	87	0.785584	0.432112	0.785584	0.432112	15	14	0.450872		227	179	74	1.10274	0.270139	1.10274	0.270139	14	14	0.285176		232	203	98	0.305505	0.759982	0.305505	0.759982	15	14	0.779995		255	180	75	1.30931	0.190431	1.30931	0.190431	15	14	0.201205		267	168	63
1228.66	8138.98	0.152334	243	192	87	0.785584	0.432112	0.785584	0.432112	15	14	0.450872		228	178	73	1.14869	0.250684	1.14869	0.250684	14	14	0.26491		231	204	99	0.261861	0.793428	0.261861	0.793428	15	14	0.813179		255	180	75	1.30931	0.190431	1.30931	0.190431	15	14	0.201205		267	168	63
1230.58	8126.22	0.152573	243	192	87	0.785584	0.432112	0.785584	0.432112	15	14	0.450872		227	179	74	1.10274	0.270139	1.10274	0.270139	14	14	0.285176		231	204	99	0.261861	0.793428	0.261861	0.793428	15	14	0.813179		255	180	75	1.30931	0.190431	1.30931	0.190431	15	14	0.201205		267	168	63
1232.51	8113.5	0.152812	243	192	87	0.785584	0.432112	0.785584	0.432112	15	14	0.450872		227	179	74	1.10274	0.270139	1.10274	0.270139	14	14	0.285176		232	203	98	0.305505	0.759982	0.305505	0.759982	15	14	0.779995		254	181	76	1.26566	0.205634	1.26566	0.205634	15	14	0.217176		267	168	63
1234.44	8100.82	0.153051	243	192	87	0.785584	0.432112	0.785584	0.432112	15	14	0.450872		228	178	73	1.14869	0.250684	1.14869	0.250684	14	14	0.26491		232	203	98	0.305505	0.759982	0.305505	0.759982	15	14	0.779995		254	181	76	1.26566	0.205634	1.26566	0.205634	15	14	0.217176		267	168	63
1236.37	8088.19	0.15329	243	192	87	0.785584	0.432112	0.785584	0.432112	15	14	0.450872		228	178	73	1.14869	0.250684	1.14869	0.250684	14	14	0.26491		232	203	98	0.305505	0.759982	0.305505	0.759982	15	14	0.779995		254	181	76	1.26566	0.205634	1.26566	0.205634	15	14	0.217176		267	168	63
1238.3	8075.59	0.15353	243	192	87	0.785584	0.432112	0.785584	0.432112	15	14	0.450872		227	179	74	1.10274	0.270139	1.10274	0.270139	14	14	0.285176		231	204	99	0.261861	0.793428	0.261861	0.793428	15	14	0.813179		254	181	76	1.26566	0.205634	1.26566	0.205634	15	14	0.217176		268	167	62
1240.23	8063.03	0.153769	243	192	87	0.785584	0.432112	0.785584	0.432112	15	14	0.450872		227	179	74	1.10274	0.270139	1.10274	0.270139	14	14	0.285176		232	203	98	0.305505	0.759982	0.305505	0.759982	15	14	0.779995		254	181	76	1.26566	0.205634	1.26566	0.205634	15	14	0.217176		267	168	63
1242.16	8050.51	0.154008	243	192	87	0.785584	0.432112	0.785584	0.432112	15	14	0.450872		227	179	74	1.10274	0.270139	1.10274	0.270139	14	14	0.285176		232	203	98	0.305505	0.759982	0.305505	0.759982	15	14	0.779995		254	181	76	1.26566	0.205634	1.26566	0.205634	15	14	0.217176		267	168	63
1244.09	8038.03	0.154247	243	192	87	0.785584	0.432112	0.785584	0.432112	15	14	0.450872		227	179	74	1.10274	0.270139	1.10274	0.270139	14	14	0.285176		231	204	99	0.261861	0.793428	0.261861	0.793428	15	14	0.813179		254	181	76	1.26566	0.205634	1.26566	0.205634	15	14	0.217176		267	168	63
1246.02	8025.58	0.154486	243	192	87	0.785584	0.432112	0.785584	0.432112	15	14	0.450872		227	179	74	1.10274	0.270139	1.10274	0.270139	14	14	0.285176		232	203	98	0.305505	0.759982	0.305505	0.759982	15	14	0.779995		254	181	76	1.26566	0.205634	1.26566	0.205634	15	14	0.217176		268	167	62
1247.94	8013.18	0.154725	243	192	87	0.785584	0.432112	0.785584	0.432112	15	14	0.450872		227	179	74	1.10274	0.270139	1.10274	0.270139	14	14	0.285176		232	203	98	0.305505	0.759982	0.305505	0.759982	15	14	0.779995		254	181	76	1.26566	0.205634	1.26566	0.205634	15	14	0.217176		268	167	62
1249.87	8000.81	0.154964	243	192	87	0.785584	0.432112	0.785584	0.432112	15	14	0.450872		227	179	74	1.10274	0.270139	1.10274	0.270139	14	14	0.285176		232	203	98	0.305505	0.759982	0.305505	0.759982	15	14	0.779995		254	181	76	1.26566	0.205634	1.26566	0.205634	15	14	0.217176		268	167	62
1251.8	7988.49	0.155204	243	192	87	0.785584	0.432112	0.785584	0.432112	15	14	0.450872		227	179	74	1.10274	0.270139	1.10274	0.270139	14	14	0.285176		234	201	96	0.392792	0.694473	0.392792	0.694473	15	14	0.71483		254	181	76	1.26566	0.205634	1.26566	0.205634	15	14	0.217176		268	167	62
1253.73	7976.2	0.155443	243	192	87	0.785584	0.432112	0.785584	0.432112	15	14	0.450872		229	177	72	1.19464	0.232229	1.19464	0.232229	14	14	0.24563		234	201	96	0.392792	0.694473	0.392792	0.694473	15	14	0.71483		254	181	76	1.26566	0.205634	1.26566	0.205634	15	14	0.217176		268	167	62
1255.66	7963.94	0.155682	243	192	87	0.785584	0.432112	0.785584	0.432112	15	14	0.450872		229	177	72	1.19464	0.232229	1.19464	0.232229	14	14	0.24563		232	203	98	0.305505	0.759982	0.305505	0.759982	15	14	0.779995		254	181	76	1.26566	0.205634	1.26566	0.205634	15	14	0.217176		268	167	62
1257.59	7951.73	0.155921	243	192	87	0.785584	0.432112	0.785584	0.432112	15	14	0.450872		229	177	72	1.19464	0.232229	1.19464	0.232229	14	14	0.24563		233	202	97	0.349149	0.726978	0.349149	0.726978	15	14	0.747192		254	181	76	1.26566	0.205634	1.26566	0.205634	15	14	0.217176		268	167	62
1259.52	7939.55	0.15616	243	192	87	0.785584	0.432112	0.785584	0.432112	15	14	0.450872		228	178	73	1.14869	0.250684	1.14869	0.250684	14	14	0.26491		234	201	96	0.392792	0.694473	0.392792	0.694473	15	14	0.71483		254	181	76	1.26566	0.205634	1.26566	0.205634	15	14	0.217176		268	167	62
1261.45	7927.41	0.156399	243	192	87	0.785584	0.432112	0.785584	0.432112	15	14	0.450872		227	179	74	1.10274	0.270139	1.10274	0.270139	14	14	0.285176		234	201	96	0.392792	0.694473	0.392792	0.694473	15	14	0.71483		254	181	76	1.26566	0.205634	1.26566	0.205634	15	14	0.217176		268	167	62
1263.37	7915.31	0.156638	243	192	87	0.785584	0.432112	0.785584	0.432112	15	14	0.450872		228	178	73	1.14869	0.250684	1.14869	0.250684	14	14	0.26491		234	201	96	0.392792	0.694473	0.392792	0.694473	15	14	0.71483		254	181	76	1.26566	0.205634	1.26566	0.205634	15	14	0.217176		269	166	61
1265.3	7903.24	0.156878	243	192	87	0.785584	0.432112	0.785584	0.432112	15	14	0.450872		228	178	73	1.14869	0.250684	1.14869	0.250684	14	14	0.26491		234	201	96	0.392792	0.694473	0.392792	0.694473	15	14	0.71483		254	181	76	1.26566	0.205634	1.26566	0.205634	15	14	0.217176		268	167	62
1267.23	7891.21	0.157117	243	192	87	0.785584	0.432112	0.785584	0.432112	15	14	0.450872		228	178	73	1.14869	0.250684	1.14869	0.250684	14	14	0.26491		234	201	96	0.392792	0.694473	0.392792	0.694473	15	14	0.71483		254	181	76	1.26566	0.205634	1.26566	0.205634	15	14	0.217176		268	167	62
1269.16	7879.22	0.157356	243	192	87	0.785584	0.432112	0.785584	0.432112	15	14	0.450872		228	178	73	1.14869	0.250684	1.14869	0.250684	14	14	0.26491		234	201	96	0.392792	0.694473	0.392792	0.694473	15	14	0.71483		254	181	76	1.26566	0.205634	1.26566	0.205634	15	14	0.217176		268	167	62
1271.09	7867.27	0.157595	243	192	87	0.785584	0.432112	0.785584	0.432112	15	14	0.450872		228	178	73	1.14869	0.250684	1.14869	0.250684	14	14	0.26491		234	201	96	0.392792	0.694473	0.392792	0.694473	15	14	0.71483		254	181	76	1.26566	0.205634	1.26566	0.205634	15	14	0.217176		269	166	61
1273.02	7855.35	0.157834	243	192	87	0.785584	0.432112	0.785584	0.432112	15	14	0.450872		228	178	73	1.14869	0.250684	1.14869	0.250684	14	14	0.26491		233	202	97	0.349149	0.726978	0.349149	0.726978	15	14	0.747192		254	181	76	1.26566	0.205634	1.26566	0.205634	15	14	0.217176		268	167	62
1274.95	7843.46	0.158073	243	192	87	0.785584	0.432112	0.785584	0.432112	15	14	0.450872		227	179	74	1.10274	0.270139	1.10274	0.270139	14	14	0.285176		234	201	96	0.392792	0.694473	0.392792	0.694473	15	14	0.71483		254	181	76	1.26566	0.205634	1.26566	0.205634	15	14	0.217176		268	167	62
1276.88	7831.61	0.158312	243	192	87	0.785584	0.432112	0.785584	0.432112	15	14	0.450872		228	178	73	1.14869	0.250684	1.14869	0.250684	14	14	0.26491		235	200	95	0.436436	0.662521	0.436436	0.662521	15	14	0.682954		254	181	76	1.26566	0.205634	1.26566	0.205634	15	14	0.217176		268	167	62
1278.81	7819.8	0.158552	243	192	87	0.785584	0.432112	0.785584	0.432112	15	14	0.450872		228	178	73	1.14869	0.250684	1.14869	0.250684	14	14	0.26491		235	200	95	0.436436	0.662521	0.436436	0.662521	15	14	0.682954		254	181	76	1.26566	0.205634	1.26566	0.205634	15	14	0.217176		269	166	61
1280.73	7808.02	0.158791	243	192	87	0.785584	0.432112	0.785584	0.432112	15	14	0.450872		228	178	73	1.14869	0.250684	1.14869	0.250684	14	14	0.26491		234	201	96	0.392792	0.694473	0.392792	0.694473	15	14	0.71483		254	181	76	1.26566	0.205634	1.26566	0.205634	15	14	0.217176		269	166	61
1282.66	7796.28	0.15903	243	192	87	0.785584	0.432112	0.785584	0.432112	15	14	0.450872		227	179	74	1.10274	0.270139	1.10274	0.270139	14	14	0.285176		233	202	97	0.349149	0.726978	0.349149	0.726978	15	14	0.747192		254	181	76	1.26566	0.205634	1.26566	0.205634	15	14	0.217176		269	166	61
1284.59	7784.58	0.159269	243	192	87	0.785584	0.432112	0.785584	0.432112	15	14	0.450872		228	178	73	1.14869	0.250684	1.14869	0.250684	14	14	0.26491		235	200	95	0.436436	0.662521	0.436436	0.662521	15	14	0.682954		254	181	76	1.26566	0.205634	1.26566	0.205634	15	14	0.217176		269	166	61
1286.52	7772.91	0.159508	243	192	87	0.785584	0.432112	0.785584	0.432112	15	14	0.450872		226	180	75	1.0568	0.290605	1.0568	0.290605	14	14	0.306426		235	200	95	0.436436	0.662521	0.436436	0.662521	15	14	0.682954		253	182	77	1.22202	0.221701	1.22202	0.221701	15	14	0.234007		269	166	61
1288.45	7761.27	0.159747	243	192	87	0.785584	0.432112	0.785584	0.432112	15	14	0.450872		225	181	76	1.01085	0.312089	1.01085	0.312089	14	14	0.328667		235	200	95	0.436436	0.662521	0.436436	0.662521	15	14	0.682954		254	181	76	1.26566	0.205634	1.26566	0.205634	15	14	0.217176		269	166	61
1290.38	7749.67	0.159986	243	192	87	0.785584	0.432112	0.785584	0.432112	15	14	0.450872		225	181	76	1.01085	0.312089	1.01085	0.312089	14	14	0.328667		235	200	95	0.436436	0.662521	0.436436	0.662521	15	14	0.682954		254	181	76	1.26566	0.205634	1.26566	0.205634	15	14	0.217176		269	166	61
1292.31	7738.1	0.160226	243	192	87	0.785584	0.432112	0.785584	0.432112	15	14	0.450872		226	180	75	1.0568	0.290605	1.0568	0.290605	14	14	0.306426		235	200	95	0.436436	0.662521	0.436436	0.662521	15	14	0.682954		254	181	76	1.26566	0.205634	1.26566	0.205634	15	14	0.217176		269	166	61
1294.24	7726.57	0.160465	243	192	87	0.785584	0.432112	0.785584	0.432112	15	14	0.450872		226	180	75	1.0568	0.290605	1.0568	0.290605	14	14	0.306426		235	200	95	0.436436	0.662521	0.436436	0.662521	15	14	0.682954		254	181	76	1.26566	0.205634	1.26566	0.205634	15	14	0.217176		269	166	61
1296.16	7715.07	0.160704	243	192	87	0.785584	0.432112	0.785584	0.432112	15	14	0.450872		226	180	75	1.0568	0.290605	1.0568	0.290605	14	14	0.306426		235	200	95	0.436436	0.662521	0.436436	0.662521	15	14	0.682954		254	181	76	1.26566	0.205634	1.26566	0.205634	15	14	0.217176		269	166	61
1298.09	7703.61	0.160943	243	192	87	0.785584	0.432112	0.785584	0.432112	15	14	0.450872		225	181	76	1.01085	0.312089	1.01085	0.312089	14	14	0.328667		235	200	95	0.436436	0.662521	0.436436	0.662521	15	14	0.682954		253	182	77	1.22202	0.221701	1.22202	0.221701	15	14	0.234007		269	166	61
1300.02	7692.18	0.161182	242	193	88	0.741941	0.458124	0.741941	0.458124	15	14	0.477307		225	181	76	1.01085	0.312089	1.01085	0.312089	14	14	0.328667		235	200	95	0.436436	0.662521	0.436436	0.662521	15	14	0.682954		253	182	77	1.22202	0.221701	1.22202	0.221701	15	14	0.234007		269	166	61
1301.95	7680.78	0.161421	242	193	88	0.741941	0.458124	0.741941	0.458124	15	14	0.477307		226	180	75	1.0568	0.290605	1.0568	0.290605	14	14	0.306426		235	200	95	0.436436	0.662521	0.436436	0.662521	15	14	0.682954		254	181	76	1.26566	0.205634	1.26566	0.205634	15	14	0.217176		269	166	61
1303.88	7669.42	0.16166	243	192	87	0.785584	0.432112	0.785584	0.432112	15	14	0.450872		226	180	75	1.0568	0.290605	1.0568	0.290605	14	14	0.306426		235	200	95	0.436436	0.662521	0.436436	0.662521	15	14	0.682954		254	181	76	1.26566	0.205634	1.26566	0.205634	15	14	0.217176		269	166	61
1305.81	7658.09	0.1619	243	192	87	0.785584	0.432112	0.785584	0.432112	15	14	0.450872		226	180	75	1.0568	0.290605	1.0568	0.290605	14	14	0.306426		235	200	95	0.436436	0.662521	0.436436	0.662521	15	14	0.682954		254	181	76	1.26566	0.205634	1.26566	0.205634	15	14	0.217176		269	166	61
1307.74	7646.8	0.162139	242	193	88	0.741941	0.458124	0.741941	0.458124	15	14	0.477307		228	178	73	1.14869	0.250684	1.14869	0.250684	14	14	0.26491		235	200	95	0.436436	0.662521	0.436436	0.662521	15	14	0.682954		254	181	76	1.26566	0.205634	1.26566	0.205634	15	14	0.217176		269	166	61
1309.67	7635.53	0.162378	242	193	88	0.741941	0.458124	0.741941	0.458124	15	14	0.477307		226	180	75	1.0568	0.290605	1.0568	0.290605	14	14	0.306426		235	200	95	0.436436	0.662521	0.436436	0.662521	15	14	0.682954		253	182	77	1.22202	0.221701	1.22202	0.221701	15	14	0.234007		269	166	61
1311.59	7624.31	0.162617	242	193	88	0.741941	0.458124	0.741941	0.458124	15	14	0.477307		226	180	75	1.0568	0.290605	1.0568	0.290605	14	14	0.306426		235	200	95	0.436436	0.662521	0.436436	0.662521	15	14	0.682954		253	182	77	1.22202	0.221701	1.22202	0.221701	15	14	0.234007		269	166	61
1313.52	7613.11	0.162856	242	193	88	0.741941	0.458124	0.741941	0.458124	15	14	0.477307		227	179	74	1.10274	0.270139	1.10274	0.270139	14	14	0.285176		235	200	95	0.436436	0.662521	0.436436	0.662521	15	14	0.682954		253	182	77	1.22202	0.221701	1.22202	0.221701	15	14	0.234007		269	166	61
1315.45	7601.95	0.163095	243	192	87	0.785584	0.432112	0.785584	0.432112	15	14	0.450872		227	179	74	1.10274	0.270139	1.10274	0.270139	14	14	0.285176		235	200	95	0.436436	0.662521	0.436436	0.662521	15	14	0.682954		254	181	76	1.26566	0.205634	1.26566	0.205634	15	14	0.217176		269	166	61
1317.38	7590.82	0.163334	243	192	87	0.785584	0.432112	0.785584	0.432112	15	14	0.450872		228	178	73	1.14869	0.250684	1.14869	0.250684	14	14	0.26491		235	200	95	0.436436	0.662521	0.436436	0.662521	15	14	0.682954		253	182	77	1.22202	0.221701	1.22202	0.221701	15	14	0.234007		269	166	61
1319.31	7579.72	0.163574	243	192	87	0.785584	0.432112	0.785584	0.432112	15	14	0.450872		228	178	73	1.14869	0.250684	1.14869	0.250684	14	14	0.26491		235	200	95	0.436436	0.662521	0.436436	0.662521	15	14	0.682954		253	182	77	1.22202	0.221701	1.22202	0.221701	15	14	0.234007		269	166	61
1321.24	7568.65	0.163813	242	193	88	0.741941	0.458124	0.741941	0.458124	15	14	0.477307		227	179	74	1.10274	0.270139	1.10274	0.270139	14	14	0.285176		235	200	95	0.436436	0.662521	0.436436	0.662521	15	14	0.682954		254	181	76	1.26566	0.205634	1.26566	0.205634	15	14	0.217176		269	166	61
1323.17	7557.62	0.164052	242	193	88	0.741941	0.458124	0.741941	0.458124	15	14	0.477307		227	179	74	1.10274	0.270139	1.10274	0.270139	14	14	0.285176		235	200	95	0.436436	0.662521	0.436436	0.662521	15	14	0.682954		253	182	77	1.22202	0.221701	1.22202	0.221701	15	14	0.234007		269	166	61
1325.1	7546.62	0.164291	242	193	88	0.741941	0.458124	0.741941	0.458124	15	14	0.477307		227	179	74	1.10274	0.270139	1.10274	0.270139	14	14	0.285176		235	200	95	0.436436	0.662521	0.436436	0.662521	15	14	0.682954		253	182	77	1.22202	0.221701	1.22202	0.221701	15	14	0.234007		269	166	61
1327.03	7535.65	0.16453	242	193	88	0.741941	0.458124	0.741941	0.458124	15	14	0.477307		227	179	74	1.10274	0.270139	1.10274	0.270139	14	14	0.285176		235	200	95	0.436436	0.662521	0.436436	0.662521	15	14	0.682954		253	182	77	1.22202	0.221701	1.22202	0.221701	15	14	0.234007		269	166	61
1328.95	7524.71	0.164769	242	193	88	0.741941	0.458124	0.741941	0.458124	15	14	0.477307		227	179	74	1.10274	0.270139	1.10274	0.270139	14	14	0.285176		235	200	95	0.436436	0.662521	0.436436	0.662521	15	14	0.682954		253	182	77	1.22202	0.221701	1.22202	0.221701	15	14	0.234007		269	166	61
1330.88	7513.81	0.165008	242	193	88	0.741941	0.458124	0.741941	0.458124	15	14	0.477307		227	179	74	1.10274	0.270139	1.10274	0.270139	14	14	0.285176		235	200	95	0.436436	0.662521	0.436436	0.662521	15	14	0.682954		253	182	77	1.22202	0.221701	1.22202	0.221701	15	14	0.234007		269	166	61
1332.81	7502.93	0.165248	242	193	88	0.741941	0.458124	0.741941	0.458124	15	14	0.477307		228	178	73	1.14869	0.250684	1.14869	0.250684	14	14	0.26491		235	200	95	0.436436	0.662521	0.436436	0.662521	15	14	0.682954		254	181	76	1.26566	0.205634	1.26566	0.205634	15	14	0.217176		269	166	61
1334.74	7492.09	0.165487	243	192	87	0.785584	0.432112	0.785584	0.432112	15	14	0.450872		227	179	74	1.10274	0.270139	1.10274	0.270139	14	14	0.285176		235	200	95	0.436436	0.662521	0.436436	0.662521	15	14	0.682954		254	181	76	1.26566	0.205634	1.26566	0.205634	15	14	0.217176		269	166	61
1336.67	7481.28	0.165726	243	192	87	0.785584	0.432112	0.785584	0.432112	15	14	0.450872		227	179	74	1.10274	0.270139	1.10274	0.270139	14	14	0.285176		235	200	95	0.436436	0.662521	0.436436	0.662521	15	14	0.682954		254	181	76	1.26566	0.205634	1.26566	0.205634	15	14	0.217176		269	166	61
1338.6	7470.5	0.165965	243	192	87	0.785584	0.432112	0.785584	0.432112	15	14	0.450872		227	179	74	1.10274	0.270139	1.10274	0.270139	14	14	0.285176		235	200	95	0.436436	0.662521	0.436436	0.662521	15	14	0.682954		255	180	75	1.30931	0.190431	1.30931	0.190431	15	14	0.201205		269	166	61
1340.53	7459.75	0.166204	241	194	89	0.698297	0.484992	0.698297	0.484992	15	14	0.504539		227	179	74	1.10274	0.270139	1.10274	0.270139	14	14	0.285176		235	200	95	0.436436	0.662521	0.436436	0.662521	15	14	0.682954		254	181	76	1.26566	0.205634	1.26566	0.205634	15	14	0.217176		269	166	61
1342.46	7449.03	0.166443	242	193	88	0.741941	0.458124	0.741941	0.458124	15	14	0.477307		227	179	74	1.10274	0.270139	1.10274	0.270139	14	14	0.285176		235	200	95	0.436436	0.662521	0.436436	0.662521	15	14	0.682954		253	182	77	1.22202	0.221701	1.22202	0.221701	15	14	0.234007		269	166	61
1344.38	7438.35	0.166682	242	193	88	0.741941	0.458124	0.741941	0.458124	15	14	0.477307		227	179	74	1.10274	0.270139	1.10274	0.270139	14	14	0.285176		235	200	95	0.436436	0.662521	0.436436	0.662521	15	14	0.682954		255	180	75	1.30931	0.190431	1.30931	0.190431	15	14	0.201205		269	166	61
1346.31	7427.69	0.166922	243	192	87	0.785584	0.432112	0.785584	0.432112	15	14	0.450872		227	179	74	1.10274	0.270139	1.10274	0.270139	14	14	0.285176		235	200	95	0.436436	0.662521	0.436436	0.662521	15	14	0.682954		255	180	75	1.30931	0.190431	1.30931	0.190431	15	14	0.201205		269	166	61
1348.24	7417.06	0.167161	243	192	87	0.785584	0.432112	0.785584	0.432112	15	14	0.450872		228	178	73	1.14869	0.250684	1.14869	0.250684	14	14	0.26491		236	199	94	0.480079	0.631171	0.480079	0.631171	15	14	0.651619		255	180	75	1.30931	0.190431	1.30931	0.190431	15	14	0.201205		269	166	61
1350.17	7406.47	0.1674	243	192	87	0.785584	0.432112	0.785584	0.432112	15	14	0.450872		227	179	74	1.10274	0.270139	1.10274	0.270139	14	14	0.285176		236	199	94	0.480079	0.631171	0.480079	0.631171	15	14	0.651619		255	180	75	1.30931	0.190431	1.30931	0.190431	15	14	0.201205		269	166	61
1352.1	7395.9	0.167639	244	191	86	0.829228	0.406976	0.829228	0.406976	15	14	0.425262		227	179	74	1.10274	0.270139	1.10274	0.270139	14	14	0.285176		236	199	94	0.480079	0.631171	0.480079	0.631171	15	14	0.651619		255	180	75	1.30931	0.190431	1.30931	0.190431	15	14	0.201205		269	166	61
1354.03	7385.37	0.167878	244	191	86	0.829228	0.406976	0.829228	0.406976	15	14	0.425262		227	179	74	1.10274	0.270139	1.10274	0.270139	14	14	0.285176		236	199	94	0.480079	0.631171	0.480079	0.631171	15	14	0.651619		255	180	75	1.30931	0.190431	1.30931	0.190431	15	14	0.201205		269	166	61
1355.96	7374.86	0.168117	244	191	86	0.829228	0.406976	0.829228	0.406976	15	14	0.425262		226	180	75	1.0568	0.290605	1.0568	0.290605	14	14	0.306426		236	199	94	0.480079	0.631171	0.480079	0.631171	15	14	0.651619		255	180	75	1.30931	0.190431	1.30931	0.190431	15	14	0.201205		269	166	61
1357.89	7364.39	0.168356	244	191	86	0.829228	0.406976	0.829228	0.406976	15	14	0.425262		226	180	75	1.0568	0.290605	1.0568	0.290605	14	14	0.306426		236	199	94	0.480079	0.631171	0.480079	0.631171	15	14	0.651619		256	179	74	1.35295	0.176072	1.35295	0.176072	15	14	0.186083		269	166	61
1359.82	7353.94	0.168596	244	191	86	0.829228	0.406976	0.829228	0.406976	15	14	0.425262		227	179	74	1.10274	0.270139	1.10274	0.270139	14	14	0.285176		236	199	94	0.480079	0.631171	0.480079	0.631171	15	14	0.651619		256	179	74	1.35295	0.176072	1.35295	0.176072	15	14	0.186083		269	166	61
1361.74	7343.52	0.168835	243	192	87	0.785584	0.432112	0.785584	0.432112	15	14	0.450872		227	179	74	1.10274	0.270139	1.10274	0.270139	14	14	0.285176		236	199	94	0.480079	0.631171	0.480079	0.631171	15	14	0.651619		255	180	75	1.30931	0.190431	1.30931	0.190431	15	14	0.201205		269	166	61
1363.67	7333.14	0.169074	243	192	87	0.785584	0.432112	0.785584	0.432112	15	14	0.450872		226	180	75	1.0568	0.290605	1.0568	0.290605	14	14	0.306426		236	199	94	0.480079	0.631171	0.480079	0.631171	15	14	0.651619		256	179	74	1.35295	0.176072	1.35295	0.176072	15	14	0.186083		269	166	61
1365.6	7322.78	0.169313	244	191	86	0.829228	0.406976	0.829228	0.406976	15	14	0.425262		226	180	75	1.0568	0.290605	1.0568	0.290605	14	14	0.306426		236	199	94	0.480079	0.631171	0.480079	0.631171	15	14	0.651619		256	179	74	1.35295	0.176072	1.35295	0.176072	15	14	0.186083		269	166	61
1367.53	7312.45	0.169552	244	191	86	0.829228	0.406976	0.829228	0.406976	15	14	0.425262		226	180	75	1.0568	0.290605	1.0568	0.290605	14	14	0.306426		236	199	94	0.480079	0.631171	0.480079	0.631171	15	14	0.651619		256	179	74	1.35295	0.176072	1.35295	0.176072	15	14	0.186083		269	166	61
1369.46	7302.15	0.169791	244	191	86	0.829228	0.406976	0.829228	0.406976	15	14	0.425262		226	180	75	1.0568	0.290605	1.0568	0.290605	14	14	0.306426		236	199	94	0.480079	0.631171	0.480079	0.631171	15	14	0.651619		256	179	74	1.35295	0.176072	1.35295	0.176072	15	14	0.186083		269	166	61
1371.39	7291.88	0.17003	244	191	86	0.829228	0.406976	0.829228	0.406976	15	14	0.425262		226	180	75	1.0568	0.290605	1.0568	0.290605	14	14	0.306426		236	199	94	0.480079	0.631171	0.480079	0.631171	15	14	0.651619		256	179	74	1.35295	0.176072	1.35295	0.176072	15	14	0.186083		269	166	61
1373.32	7281.64	0.17027	243	192	87	0.785584	0.432112	0.785584	0.432112	15	14	0.450872		227	179	74	1.10274	0.270139	1.10274	0.270139	14	14	0.285176		236	199	94	0.480079	0.631171	0.480079	0.631171	15	14	0.651619		256	179	74	1.35295	0.176072	1.35295	0.176072	15	14	0.186083		269	166	61
1375.25	7271.43	0.170509	243	192	87	0.785584	0.432112	0.785584	0.432112	15	14	0.450872		226	180	75	1.0568	0.290605	1.0568	0.290605	14	14	0.306426		236	199	94	0.480079	0.631171	0.480079	0.631171	15	14	0.651619		256	179	74	1.35295	0.176072	1.35295	0.176072	15	14	0.186083		269	166	61
1377.17	7261.24	0.170748	243	192	87	0.785584	0.432112	0.785584	0.432112	15	14	0.450872		227	179	74	1.10274	0.270139	1.10274	0.270139	14	14	0.285176		236	199	94	0.480079	0.631171	0.480079	0.631171	15	14	0.651619		256	179	74	1.35295	0.176072	1.35295	0.176072	15	14	0.186083		269	166	61
1379.1	7251.09	0.170987	243	192	87	0.785584	0.432112	0.785584	0.432112	15	14	0.450872		226	180	75	1.0568	0.290605	1.0568	0.290605	14	14	0.306426		236	199	94	0.480079	0.631171	0.480079	0.631171	15	14	0.651619		256	179	74	1.35295	0.176072	1.35295	0.176072	15	14	0.186083		269	166	61
1381.03	7240.96	0.171226	243	192	87	0.785584	0.432112	0.785584	0.432112	15	14	0.450872		226	180	75	1.0568	0.290605	1.0568	0.290605	14	14	0.306426		236	199	94	0.480079	0.631171	0.480079	0.631171	15	14	0.651619		256	179	74	1.35295	0.176072	1.35295	0.176072	15	14	0.186083		269	166	61
1382.96	7230.86	0.171465	243	192	87	0.785584	0.432112	0.785584	0.432112	15	14	0.450872		227	179	74	1.10274	0.270139	1.10274	0.270139	14	14	0.285176		236	199	94	0.480079	0.631171	0.480079	0.631171	15	14	0.651619		256	179	74	1.35295	0.176072	1.35295	0.176072	15	14	0.186083		268	167	62
1384.89	7220.79	0.171704	244	191	86	0.829228	0.406976	0.829228	0.406976	15	14	0.425262		226	180	75	1.0568	0.290605	1.0568	0.290605	14	14	0.306426		236	199	94	0.480079	0.631171	0.480079	0.631171	15	14	0.651619		256	179	74	1.35295	0.176072	1.35295	0.176072	15	14	0.186083		268	167	62
1386.82	7210.75	0.171944	244	191	86	0.829228	0.406976	0.829228	0.406976	15	14	0.425262		227	179	74	1.10274	0.270139	1.10274	0.270139	14	14	0.285176		236	199	94	0.480079	0.631171	0.480079	0.631171	15	14	0.651619		256	179	74	1.35295	0.176072	1.35295	0.176072	15	14	0.186083		269	166	61
1388.75	7200.73	0.172183	244	191	86	0.829228	0.406976	0.829228	0.406976	15	14	0.425262		227	179	74	1.10274	0.270139	1.10274	0.270139	14	14	0.285176		236	199	94	0.480079	0.631171	0.480079	0.631171	15	14	0.651619		256	179	74	1.35295	0.176072	1.35295	0.176072	15	14	0.186083		269	166	61
1390.68	7190.75	0.172422	244	191	86	0.829228	0.406976	0.829228	0.406976	15	14	0.425262		227	179	74	1.10274	0.270139	1.10274	0.270139	14	14	0.285176		237	198	93	0.523723	0.600472	0.523723	0.600472	15	14	0.620867		256	179	74	1.35295	0.176072	1.35295	0.176072	15	14	0.186083		268	167	62
1392.61	7180.79	0.172661	244	191	86	0.829228	0.406976	0.829228	0.406976	15	14	0.425262		227	179	74	1.10274	0.270139	1.10274	0.270139	14	14	0.285176		237	198	93	0.523723	0.600472	0.523723	0.600472	15	14	0.620867		257	178	73	1.39659	0.162537	1.39659	0.162537	15	14	0.171789		269	166	61
1394.53	7170.85	0.1729	243	192	87	0.785584	0.432112	0.785584	0.432112	15	14	0.450872		227	179	74	1.10274	0.270139	1.10274	0.270139	14	14	0.285176		238	197	92	0.567367	0.570466	0.567367	0.570466	15	14	0.590745		256	179	74	1.35295	0.176072	1.35295	0.176072	15	14	0.186083		269	166	61
1396.46	7160.95	0.173139	243	192	87	0.785584	0.432112	0.785584	0.432112	15	14	0.450872		227	179	74	1.10274	0.270139	1.10274	0.270139	14	14	0.285176		238	197	92	0.567367	0.570466	0.567367	0.570466	15	14	0.590745		256	179	74	1.35295	0.176072	1.35295	0.176072	15	14	0.186083		270	165	60
1398.39	7151.07	0.173378	243	192	87	0.785584	0.432112	0.785584	0.432112	15	14	0.450872		227	179	74	1.10274	0.270139	1.10274	0.270139	14	14	0.285176		238	197	92	0.567367	0.570466	0.567367	0.570466	15	14	0.590745		256	179	74	1.35295	0.176072	1.35295	0.176072	15	14	0.186083		270	165	60
1400.32	7141.22	0.173618	243	192	87	0.785584	0.432112	0.785584	0.432112	15	14	0.450872		227	179	74	1.10274	0.270139	1.10274	0.270139	14	14	0.285176		237	198	93	0.523723	0.600472	0.523723	0.600472	15	14	0.620867		256	179	74	1.35295	0.176072	1.35295	0.176072	15	14	0.186083		269	166	61
1402.25	7131.4	0.173857	243	192	87	0.785584	0.432112	0.785584	0.432112	15	14	0.450872		228	178	73	1.14869	0.250684	1.14869	0.250684	14	14	0.26491		237	198	93	0.523723	0.600472	0.523723	0.600472	15	14	0.620867		257	178	73	1.39659	0.162537	1.39659	0.162537	15	14	0.171789		269	166	61
1404.18	7121.6	0.174096	243	192	87	0.785584	0.432112	0.785584	0.432112	15	14	0.450872		229	177	72	1.19464	0.232229	1.19464	0.232229	14	14	0.24563		237	198	93	0.523723	0.600472	0.523723	0.600472	15	14	0.620867		257	178	73	1.39659	0.162537	1.39659	0.162537	15	14	0.171789		270	165	60
1406.11	7111.83	0.174335	243	192	87	0.785584	0.432112	0.785584	0.432112	15	14	0.450872		229	177	72	1.19464	0.232229	1.19464	0.232229	14	14	0.24563		237	198	93	0.523723	0.600472	0.523723	0.600472	15	14	0.620867		257	178	73	1.39659	0.162537	1.39659	0.162537	15	14	0.171789		270	165	60
1408.04	7102.09	0.174574	243	192	87	0.785584	0.432112	0.785584	0.432112	15	14	0.450872		229	177	72	1.19464	0.232229	1.19464	0.232229	14	14	0.24563		237	198	93	0.523723	0.600472	0.523723	0.600472	15	14	0.620867		257	178	73	1.39659	0.162537	1.39659	0.162537	15	14	0.171789		269	166	61
1409.96	7092.38	0.174813	243	192	87	0.785584	0.432112	0.785584	0.432112	15	14	0.450872		229	177	72	1.19464	0.232229	1.19464	0.232229	14	14	0.24563		237	198	93	0.523723	0.600472	0.523723	0.600472	15	14	0.620867		257	178	73	1.39659	0.162537	1.39659	0.162537	15	14	0.171789		269	166	61
1411.89	7082.69	0.175052	243	192	87	0.785584	0.432112	0.785584	0.432112	15	14	0.450872		228	178	73	1.14869	0.250684	1.14869	0.250684	14	14	0.26491		237	198	93	0.523723	0.600472	0.523723	0.600472	15	14	0.620867		258	177	72	1.44024	0.149801	1.44024	0.149801	15	14	0.158309		269	166	61
1413.82	7073.03	0.175292	244	191	86	0.829228	0.406976	0.829228	0.406976	15	14	0.425262		228	178	73	1.14869	0.250684	1.14869	0.250684	14	14	0.26491		238	197	92	0.567367	0.570466	0.567367	0.570466	15	14	0.590745		258	177	72	1.44024	0.149801	1.44024	0.149801	15	14	0.158309		270	165	60
1415.75	7063.39	0.175531	245	190	85	0.872872	0.382734	0.872872	0.382734	15	14	0.400494		228	178	73	1.14869	0.250684	1.14869	0.250684	14	14	0.26491		238	197	92	0.567367	0.570466	0.567367	0.570466	15	14	0.590745		258	177	72	1.44024	0.149801	1.44024	0.149801	15	14	0.158309		271	164	59
1417.68	7053.78	0.17577	244	191	86	0.829228	0.406976	0.829228	0.406976	15	14	0.425262		227	179	74	1.10274	0.270139	1.10274	0.270139	14	14	0.285176		239	196	91	0.61101	0.541193	0.61101	0.541193	15	14	0.561291		257	178	73	1.39659	0.162537	1.39659	0.162537	15	14	0.171789		271	164	59
1419.61	7044.2	0.176009	243	192	87	0.785584	0.432112	0.785584	0.432112	15	14	0.450872		227	179	74	1.10274	0.270139	1.10274	0.270139	14	14	0.285176		239	196	91	0.61101	0.541193	0.61101	0.541193	15	14	0.561291		256	179	74	1.35295	0.176072	1.35295	0.176072	15	14	0.186083		269	166	61
1421.54	7034.64	0.176248	244	191	86	0.829228	0.406976	0.829228	0.406976	15	14	0.425262		229	177	72	1.19464	0.232229	1.19464	0.232229	14	14	0.24563		238	197	92	0.567367	0.570466	0.567367	0.570466	15	14	0.590745		257	178	73	1.39659	0.162537	1.39659	0.162537	15	14	0.171789		270	165	60
1423.47	7025.11	0.176487	244	191	86	0.829228	0.406976	0.829228	0.406976	15	14	0.425262		229	177	72	1.19464	0.232229	1.19464	0.232229	14	14	0.24563		238	197	92	0.567367	0.570466	0.567367	0.570466	15	14	0.590745		257	178	73	1.39659	0.162537	1.39659	0.162537	15	14	0.171789		270	165	60
1425.4	7015.6	0.176726	244	191	86	0.829228	0.406976	0.829228	0.406976	15	14	0.425262		228	178	73	1.14869	0.250684	1.14869	0.250684	14	14	0.26491		238	197	92	0.567367	0.570466	0.567367	0.570466	15	14	0.590745		257	178	73	1.39659	0.162537	1.39659	0.162537	15	14	0.171789		270	165	60
1427.32	7006.12	0.176966	245	190	85	0.872872	0.382734	0.872872	0.382734	15	14	0.400494		229	177	72	1.19464	0.232229	1.19464	0.232229	14	14	0.24563		238	197	92	0.567367	0.570466	0.567367	0.570466	15	14	0.590745		258	177	72	1.44024	0.149801	1.44024	0.149801	15	14	0.158309		271	164	59
1429.25	6996.66	0.177205	245	190	85	0.872872	0.382734	0.872872	0.382734	15	14	0.400494		229	177	72	1.19464	0.232229	1.19464	0.232229	14	14	0.24563		238	197	92	0.567367	0.570466	0.567367	0.570466	15	14	0.590745		258	177	72	1.44024	0.149801	1.44024	0.149801	15	14	0.158309		271	164	59
1431.18	6987.23	0.177444	244	191	86	0.829228	0.406976	0.829228	0.406976	15	14	0.425262		229	177	72	1.19464	0.232229	1.19464	0.232229	14	14	0.24563		238	197	92	0.567367	0.570466	0.567367	0.570466	15	14	0.590745		257	178	73	1.39659	0.162537	1.39659	0.162537	15	14	0.171789		271	164	59
1433.11	6977.83	0.177683	245	190	85	0.872872	0.382734	0.872872	0.382734	15	14	0.400494		229	177	72	1.19464	0.232229	1.19464	0.232229	14	14	0.24563		238	197	92	0.567367	0.570466	0.567367	0.570466	15	14	0.590745		258	177	72	1.44024	0.149801	1.44024	0.149801	15	14	0.158309		271	164	59
1435.04	6968.45	0.177922	245	190	85	0.872872	0.382734	0.872872	0.382734	15	14	0.400494		228	178	73	1.14869	0.250684	1.14869	0.250684	14	14	0.26491		238	197	92	0.567367	0.570466	0.567367	0.570466	15	14	0.590745		258	177	72	1.44024	0.149801	1.44024	0.149801	15	14	0.158309		271	164	59
1436.97	6959.1	0.178161	244	191	86	0.829228	0.406976	0.829228	0.406976	15	14	0.425262		228	178	73	1.14869	0.250684	1.14869	0.250684	14	14	0.26491		238	197	92	0.567367	0.570466	0.567367	0.570466	15	14	0.590745		257	178	73	1.39659	0.162537	1.39659	0.162537	15	14	0.171789		270	165	60
1438.9	6949.77	0.1784	244	191	86	0.829228	0.406976	0.829228	0.406976	15	14	0.425262		228	178	73	1.14869	0.250684	1.14869	0.250684	14	14	0.26491		238	197	92	0.567367	0.570466	0.567367	0.570466	15	14	0.590745		258	177	72	1.44024	0.149801	1.44024	0.149801	15	14	0.158309		270	165	60
1440.83	6940.47	0.17864	245	190	85	0.872872	0.382734	0.872872	0.382734	15	14	0.400494		228	178	73	1.14869	0.250684	1.14869	0.250684	14	14	0.26491		238	197	92	0.567367	0.570466	0.567367	0.570466	15	14	0.590745		258	177	72	1.44024	0.149801	1.44024	0.149801	15	14	0.158309		271	164	59
1442.75	6931.19	0.178879	244	191	86	0.829228	0.406976	0.829228	0.406976	15	14	0.425262		228	178	73	1.14869	0.250684	1.14869	0.250684	14	14	0.26491		238	197	92	0.567367	0.570466	0.567367	0.570466	15	14	0.590745		259	176	71	1.48388	0.137841	1.48388	0.137841	15	14	0.145619		271	164	59
1444.68	6921.93	0.179118	244	191	86	0.829228	0.406976	0.829228	0.406976	15	14	0.425262		228	178	73	1.14869	0.250684	1.14869	0.250684	14	14	0.26491		238	197	92	0.567367	0.570466	0.567367	0.570466	15	14	0.590745		260	175	70	1.52753	0.126631	1.52753	0.126631	15	14	0.1337		271	164	59
1446.61	6912.7	0.179357	244	191	86	0.829228	0.406976	0.829228	0.406976	15	14	0.425262		229	177	72	1.19464	0.232229	1.19464	0.232229	14	14	0.24563		238	197	92	0.567367	0.570466	0.567367	0.570466	15	14	0.590745		260	175	70	1.52753	0.126631	1.52753	0.126631	15	14	0.1337		272	163	58
1448.54	6903.5	0.179596	244	191	86	0.829228	0.406976	0.829228	0.406976	15	14	0.425262		229	177	72	1.19464	0.232229	1.19464	0.232229	14	14	0.24563		238	197	92	0.567367	0.570466	0.567367	0.570466	15	14	0.590745		259	176	71	1.48388	0.137841	1.48388	0.137841	15	14	0.145619		271	164	59
1450.47	6894.32	0.179835	244	191	86	0.829228	0.406976	0.829228	0.406976	15	14	0.425262		228	178	73	1.14869	0.250684	1.14869	0.250684	14	14	0.26491		238	197	92	0.567367	0.570466	0.567367	0.570466	15	14	0.590745		260	175	70	1.52753	0.126631	1.52753	0.126631	15	14	0.1337		272	163	58
1452.4	6885.16	0.180074	245	190	85	0.872872	0.382734	0.872872	0.382734	15	14	0.400494		227	179	74	1.10274	0.270139	1.10274	0.270139	14	14	0.285176		238	197	92	0.567367	0.570466	0.567367	0.570466	15	14	0.590745		261	174	69	1.57117	0.116144	1.57117	0.116144	15	14	0.122524		272	163	58
1454.33	6876.03	0.180314	246	189	84	0.916515	0.359397	0.916515	0.359397	15	14	0.376588		227	179	74	1.10274	0.270139	1.10274	0.270139	14	14	0.285176		238	197	92	0.567367	0.570466	0.567367	0.570466	15	14	0.590745		261	174	69	1.57117	0.116144	1.57117	0.116144	15	14	0.122524		271	164	59
1456.26	6866.92	0.180553	244	191	86	0.829228	0.406976	0.829228	0.406976	15	14	0.425262		230	176	71	1.24059	0.214759	1.24059	0.214759	14	14	0.227321		238	197	92	0.567367	0.570466	0.567367	0.570466	15	14	0.590745		260	175	70	1.52753	0.126631	1.52753	0.126631	15	14	0.1337		271	164	59
1458.18	6857.84	0.180792	244	191	86	0.829228	0.406976	0.829228	0.406976	15	14	0.425262		229	177	72	1.19464	0.232229	1.19464	0.232229	14	14	0.24563		238	197	92	0.567367	0.570466	0.567367	0.570466	15	14	0.590745		258	177	72	1.44024	0.149801	1.44024	0.149801	15	14	0.158309		270	165	60
1460.11	6848.78	0.181031	244	191	86	0.829228	0.406976	0.829228	0.406976	15	14	0.425262		228	178	73	1.14869	0.250684	1.14869	0.250684	14	14	0.26491		238	197	92	0.567367	0.570466	0.567367	0.570466	15	14	0.590745		260	175	70	1.52753	0.126631	1.52753	0.126631	15	14	0.1337		271	164	59
1462.04	6839.75	0.18127	246	189	84	0.916515	0.359397	0.916515	0.359397	15	14	0.376588		229	177	72	1.19464	0.232229	1.19464	0.232229	14	14	0.24563		238	197	92	0.567367	0.570466	0.567367	0.570466	15	14	0.590745		261	174	69	1.57117	0.116144	1.57117	0.116144	15	14	0.122524		272	163	58
1463.97	6830.73	0.181509	244	191	86	0.829228	0.406976	0.829228	0.406976	15	14	0.425262		229	177	72	1.19464	0.232229	1.19464	0.232229	14	14	0.24563		238	197	92	0.567367	0.570466	0.567367	0.570466	15	14	0.590745		261	174	69	1.57117	0.116144	1.57117	0.116144	15	14	0.122524		272	163	58
1465.9	6821.75	0.181748	244	191	86	0.829228	0.406976	0.829228	0.406976	15	14	0.425262		229	177	72	1.19464	0.232229	1.19464	0.232229	14	14	0.24563		238	197	92	0.567367	0.570466	0.567367	0.570466	15	14	0.590745		260	175	70	1.52753	0.126631	1.52753	0.126631	15	14	0.1337		271	164	59
1467.83	6812.78	0.181988	245	190	85	0.872872	0.382734	0.872872	0.382734	15	14	0.400494		230	176	71	1.24059	0.214759	1.24059	0.214759	14	14	0.227321		238	197	92	0.567367	0.570466	0.567367	0.570466	15	14	0.590745		261	174	69	1.57117	0.116144	1.57117	0.116144	15	14	0.122524		272	163	58
1469.76	6803.84	0.182227	246	189	84	0.916515	0.359397	0.916515	0.359397	15	14	0.376588		227	179	74	1.10274	0.270139	1.10274	0.270139	14	14	0.285176		238	197	92	0.567367	0.570466	0.567367	0.570466	15	14	0.590745		261	174	69	1.57117	0.116144	1.57117	0.116144	15	14	0.122524		272	163	58
1471.69	6794.92	0.182466	244	191	86	0.829228	0.406976	0.829228	0.406976	15	14	0.425262		230	176	71	1.24059	0.214759	1.24059	0.214759	14	14	0.227321		238	197	92	0.567367	0.570466	0.567367	0.570466	15	14	0.590745		261	174	69	1.57117	0.116144	1.57117	0.116144	15	14	0.122524		272	163	58
1473.62	6786.03	0.182705	244	191	86	0.829228	0.406976	0.829228	0.406976	15	14	0.425262		229	177	72	1.19464	0.232229	1.19464	0.232229	14	14	0.24563		238	197	92	0.567367	0.570466	0.567367	0.570466	15	14	0.590745		260	175	70	1.52753	0.126631	1.52753	0.126631	15	14	0.1337		272	163	58
1475.54	6777.16	0.182944	244	191	86	0.829228	0.406976	0.829228	0.406976	15	14	0.425262		229	177	72	1.19464	0.232229	1.19464	0.232229	14	14	0.24563		238	197	92	0.567367	0.570466	0.567367	0.570466	15	14	0.590745		260	175	70	1.52753	0.126631	1.52753	0.126631	15	14	0.1337		273	162	57
1477.47	6768.31	0.183183	244	191	86	0.829228	0.406976	0.829228	0.406976	15	14	0.425262		229	177	72	1.19464	0.232229	1.19464	0.232229	14	14	0.24563		238	197	92	0.567367	0.570466	0.567367	0.570466	15	14	0.590745		260	175	70	1.52753	0.126631	1.52753	0.126631	15	14	0.1337		274	161	56
1479.4	6759.49	0.183422	245	190	85	0.872872	0.382734	0.872872	0.382734	15	14	0.400494		229	177	72	1.19464	0.232229	1.19464	0.232229	14	14	0.24563		238	197	92	0.567367	0.570466	0.567367	0.570466	15	14	0.590745		261	174	69	1.57117	0.116144	1.57117	0.116144	15	14	0.122524		274	161	56
1481.33	6750.69	0.183662	244	191	86	0.829228	0.406976	0.829228	0.406976	15	14	0.425262		229	177	72	1.19464	0.232229	1.19464	0.232229	14	14	0.24563		238	197	92	0.567367	0.570466	0.567367	0.570466	15	14	0.590745		261	174	69	1.57117	0.116144	1.57117	0.116144	15	14	0.122524		275	160	55
1483.26	6741.91	0.183901	246	189	84	0.916515	0.359397	0.916515	0.359397	15	14	0.376588		228	178	73	1.14869	0.250684	1.14869	0.250684	14	14	0.26491		238	197	92	0.567367	0.570466	0.567367	0.570466	15	14	0.590745		261	174	69	1.57117	0.116144	1.57117	0.116144	15	14	0.122524		276	159	54
1485.19	6733.15	0.18414	246	189	84	0.916515	0.359397	0.916515	0.359397	15	14	0.376588		228	178	73	1.14869	0.250684	1.14869	0.250684	14	14	0.26491		238	197	92	0.567367	0.570466	0.567367	0.570466	15	14	0.590745		262	173	68	1.61481	0.106352	1.61481	0.106352	15	14	0.11207		275	160	55
1487.12	6724.42	0.184379	246	189	84	0.916515	0.359397	0.916515	0.359397	15	14	0.376588		228	178	73	1.14869	0.250684	1.14869	0.250684	14	14	0.26491		238	197	92	0.567367	0.570466	0.567367	0.570466	15	14	0.590745		261	174	69	1.57117	0.116144	1.57117	0.116144	15	14	0.122524		273	162	57
1489.05	6715.71	0.184618	244	191	86	0.829228	0.406976	0.829228	0.406976	15	14	0.425262		229	177	72	1.19464	0.232229	1.19464	0.232229	14	14	0.24563		238	197	92	0.567367	0.570466	0.567367	0.570466	15	14	0.590745		261	174	69	1.57117	0.116144	1.57117	0.116144	15	14	0.122524		271	164	59
1490.97	6707.02	0.184857	244	191	86	0.829228	0.406976	0.829228	0.406976	15	14	0.425262		228	178	73	1.14869	0.250684	1.14869	0.250684	14	14	0.26491		238	197	92	0.567367	0.570466	0.567367	0.570466	15	14	0.590745		260	175	70	1.52753	0.126631	1.52753	0.126631	15	14	0.1337		271	164	59
1492.9	6698.36	0.185096	246	189	84	0.916515	0.359397	0.916515	0.359397	15	14	0.376588		228	178	73	1.14869	0.250684	1.14869	0.250684	14	14	0.26491		238	197	92	0.567367	0.570466	0.567367	0.570466	15	14	0.590745		261	174	69	1.57117	0.116144	1.57117	0.116144	15	14	0.122524		274	161	56
1494.83	6689.71	0.185336	246	189	84	0.916515	0.359397	0.916515	0.359397	15	14	0.376588		228	178	73	1.14869	0.250684	1.14869	0.250684	14	14	0.26491		238	197	92	0.567367	0.570466	0.567367	0.570466	15	14	0.590745		261	174	69	1.57117	0.116144	1.57117	0.116144	15	14	0.122524		274	161	56
1496.76	6681.09	0.185575	246	189	84	0.916515	0.359397	0.916515	0.359397	15	14	0.376588		230	176	71	1.24059	0.214759	1.24059	0.214759	14	14	0.227321		238	197	92	0.567367	0.570466	0.567367	0.570466	15	14	0.590745		261	174	69	1.57117	0.116144	1.57117	0.116144	15	14	0.122524		274	161	56
1498.69	6672.49	0.185814	246	189	84	0.916515	0.359397	0.916515	0.359397	15	14	0.376588		230	176	71	1.24059	0.214759	1.24059	0.214759	14	14	0.227321		238	197	92	0.567367	0.570466	0.567367	0.570466	15	14	0.590745		261	174	69	1.57117	0.116144	1.57117	0.116144	15	14	0.122524		274	161	56
1500.62	6663.92	0.186053	246	189	84	0.916515	0.359397	0.916515	0.359397	15	14	0.376588		229	177	72	1.19464	0.232229	1.19464	0.232229	14	14	0.24563		239	196	91	0.61101	0.541193	0.61101	0.541193	15	14	0.561291		261	174	69	1.57117	0.116144	1.57117	0.116144	15	14	0.122524		276	159	54
1502.55	6655.36	0.186292	246	189	84	0.916515	0.359397	0.916515	0.359397	15	14	0.376588		228	178	73	1.14869	0.250684	1.14869	0.250684	14	14	0.26491		238	197	92	0.567367	0.570466	0.567367	0.570466	15	14	0.590745		262	173	68	1.61481	0.106352	1.61481	0.106352	15	14	0.11207		276	159	54
1504.48	6646.83	0.186531	246	189	84	0.916515	0.359397	0.916515	0.359397	15	14	0.376588		228	178	73	1.14869	0.250684	1.14869	0.250684	14	14	0.26491		238	197	92	0.567367	0.570466	0.567367	0.570466	15	14	0.590745		260	175	70	1.52753	0.126631	1.52753	0.126631	15	14	0.1337		276	159	54
1506.41	6638.32	0.18677	244	191	86	0.829228	0.406976	0.829228	0.406976	15	14	0.425262		230	176	71	1.24059	0.214759	1.24059	0.214759	14	14	0.227321		239	196	91	0.61101	0.541193	0.61101	0.541193	15	14	0.561291		261	174	69	1.57117	0.116144	1.57117	0.116144	15	14	0.122524		271	164	59
1508.33	6629.83	0.18701	244	191	86	0.829228	0.406976	0.829228	0.406976	15	14	0.425262		229	177	72	1.19464	0.232229	1.19464	0.232229	14	14	0.24563		239	196	91	0.61101	0.541193	0.61101	0.541193	15	14	0.561291		260	175	70	1.52753	0.126631	1.52753	0.126631	15	14	0.1337		270	165	60
1510.26	6621.36	0.187249	245	190	85	0.872872	0.382734	0.872872	0.382734	15	14	0.400494		228	178	73	1.14869	0.250684	1.14869	0.250684	14	14	0.26491		238	197	92	0.567367	0.570466	0.567367	0.570466	15	14	0.590745		261	174	69	1.57117	0.116144	1.57117	0.116144	15	14	0.122524		272	163	58
1512.19	6612.92	0.187488	246	189	84	0.916515	0.359397	0.916515	0.359397	15	14	0.376588		229	177	72	1.19464	0.232229	1.19464	0.232229	14	14	0.24563		238	197	92	0.567367	0.570466	0.567367	0.570466	15	14	0.590745		261	174	69	1.57117	0.116144	1.57117	0.116144	15	14	0.122524		274	161	56
1514.12	6604.49	0.187727	246	189	84	0.916515	0.359397	0.916515	0.359397	15	14	0.376588		228	178	73	1.14869	0.250684	1.14869	0.250684	14	14	0.26491		238	197	92	0.567367	0.570466	0.567367	0.570466	15	14	0.590745		261	174	69	1.57117	0.116144	1.57117	0.116144	15	14	0.122524		273	162	57
1516.05	6596.09	0.187966	246	189	84	0.916515	0.359397	0.916515	0.359397	15	14	0.376588		229	177	72	1.19464	0.232229	1.19464	0.232229	14	14	0.24563		238	197	92	0.567367	0.570466	0.567367	0.570466	15	14	0.590745		261	174	69	1.57117	0.116144	1.57117	0.116144	15	14	0.122524		271	164	59
1517.98	6587.71	0.188205	246	189	84	0.916515	0.359397	0.916515	0.359397	15	14	0.376588		228	178	73	1.14869	0.250684	1.14869	0.250684	14	14	0.26491		238	197	92	0.567367	0.570466	0.567367	0.570466	15	14	0.590745		261	174	69	1.57117	0.116144	1.57117	0.116144	15	14	0.122524		272	163	58
1519.91	6579.35	0.188444	246	189	84	0.916515	0.359397	0.916515	0.359397	15	14	0.376588		230	176	71	1.24059	0.214759	1.24059	0.214759	14	14	0.227321		239	196	91	0.61101	0.541193	0.61101	0.541193	15	14	0.561291		261	174	69	1.57117	0.116144	1.57117	0.116144	15	14	0.122524		271	164	59
1521.84	6571.01	0.188684	244	191	86	0.829228	0.406976	0.829228	0.406976	15	14	0.425262		228	178	73	1.14869	0.250684	1.14869	0.250684	14	14	0.26491		239	196	91	0.61101	0.541193	0.61101	0.541193	15	14	0.561291		259	176	71	1.48388	0.137841	1.48388	0.137841	15	14	0.145619		270	165	60
1523.76	6562.69	0.188923	245	190	85	0.872872	0.382734	0.872872	0.382734	15	14	0.400494		229	177	72	1.19464	0.232229	1.19464	0.232229	14	14	0.24563		239	196	91	0.61101	0.541193	0.61101	0.541193	15	14	0.561291		260	175	70	1.52753	0.126631	1.52753	0.126631	15	14	0.1337		272	163	58
1525.69	6554.4	0.189162	246	189	84	0.916515	0.359397	0.916515	0.359397	15	14	0.376588		229	177	72	1.19464	0.232229	1.19464	0.232229	14	14	0.24563		239	196	91	0.61101	0.541193	0.61101	0.541193	15	14	0.561291		261	174	69	1.57117	0.116144	1.57117	0.116144	15	14	0.122524		271	164	59
1527.62	6546.12	0.189401	245	190	85	0.872872	0.382734	0.872872	0.382734	15	14	0.400494		228	178	73	1.14869	0.250684	1.14869	0.250684	14	14	0.26491		239	196	91	0.61101	0.541193	0.61101	0.541193	15	14	0.561291		260	175	70	1.52753	0.126631	1.52753	0.126631	15	14	0.1337		271	164	59
1529.55	6537.87	0.18964	246	189	84	0.916515	0.359397	0.916515	0.359397	15	14	0.376588		228	178	73	1.14869	0.250684	1.14869	0.250684	14	14	0.26491		238	197	92	0.567367	0.570466	0.567367	0.570466	15	14	0.590745		261	174	69	1.57117	0.116144	1.57117	0.116144	15	14	0.122524		272	163	58
1531.48	6529.63	0.189879	246	189	84	0.916515	0.359397	0.916515	0.359397	15	14	0.376588		228	178	73	1.14869	0.250684	1.14869	0.250684	14	14	0.26491		238	197	92	0.567367	0.570466	0.567367	0.570466	15	14	0.590745		260	175	70	1.52753	0.126631	1.52753	0.126631	15	14	0.1337		273	162	57
1533.41	6521.42	0.190118	245	190	85	0.872872	0.382734	0.872872	0.382734	15	14	0.400494		229	177	72	1.19464	0.232229	1.19464	0.232229	14	14	0.24563		239	196	91	0.61101	0.541193	0.61101	0.541193	15	14	0.561291		259	176	71	1.48388	0.137841	1.48388	0.137841	15	14	0.145619		271	164	59
1535.34	6513.23	0.190358	245	190	85	0.872872	0.382734	0.872872	0.382734	15	14	0.400494		228	178	73	1.14869	0.250684	1.14869	0.250684	14	14	0.26491		239	196	91	0.61101	0.541193	0.61101	0.541193	15	14	0.561291		259	176	71	1.48388	0.137841	1.48388	0.137841	15	14	0.145619		271	164	59
1537.27	6505.05	0.190597	246	189	84	0.916515	0.359397	0.916515	0.359397	15	14	0.376588		228	178	73	1.14869	0.250684	1.14869	0.250684	14	14	0.26491		238	197	92	0.567367	0.570466	0.567367	0.570466	15	14	0.590745		259	176	71	1.48388	0.137841	1.48388	0.137841	15	14	0.145619		270	165	60
1539.2	6496.9	0.190836	245	190	85	0.872872	0.382734	0.872872	0.382734	15	14	0.400494		229	177	72	1.19464	0.232229	1.19464	0.232229	14	14	0.24563		237	198	93	0.523723	0.600472	0.523723	0.600472	15	14	0.620867		258	177	72	1.44024	0.149801	1.44024	0.149801	15	14	0.158309		270	165	60
1541.12	6488.77	0.191075	244	191	86	0.829228	0.406976	0.829228	0.406976	15	14	0.425262		228	178	73	1.14869	0.250684	1.14869	0.250684	14	14	0.26491		239	196	91	0.61101	0.541193	0.61101	0.541193	15	14	0.561291		259	176	71	1.48388	0.137841	1.48388	0.137841	15	14	0.145619		270	165	60
1543.05	6480.66	0.191314	244	191	86	0.829228	0.406976	0.829228	0.406976	15	14	0.425262		228	178	73	1.14869	0.250684	1.14869	0.250684	14	14	0.26491		240	195	90	0.654654	0.512691	0.654654	0.512691	15	14	0.532545		260	175	70	1.52753	0.126631	1.52753	0.126631	15	14	0.1337		270	165	60
1544.98	6472.57	0.191553	244	191	86	0.829228	0.406976	0.829228	0.406976	15	14	0.425262		227	179	74	1.10274	0.270139	1.10274	0.270139	14	14	0.285176		240	195	90	0.654654	0.512691	0.654654	0.512691	15	14	0.532545		261	174	69	1.57117	0.116144	1.57117	0.116144	15	14	0.122524		269	166	61
1546.91	6464.5	0.191792	244	191	86	0.829228	0.406976	0.829228	0.406976	15	14	0.425262		228	178	73	1.14869	0.250684	1.14869	0.250684	14	14	0.26491		239	196	91	0.61101	0.541193	0.61101	0.541193	15	14	0.561291		261	174	69	1.57117	0.116144	1.57117	0.116144	15	14	0.122524		271	164	59
1548.84	6456.45	0.192032	245	190	85	0.872872	0.382734	0.872872	0.382734	15	14	0.400494		228	178	73	1.14869	0.250684	1.14869	0.250684	14	14	0.26491		239	196	91	0.61101	0.541193	0.61101	0.541193	15	14	0.561291		260	175	70	1.52753	0.126631	1.52753	0.126631	15	14	0.1337		271	164	59
1550.77	6448.42	0.192271	244	191	86	0.829228	0.406976	0.829228	0.406976	15	14	0.425262		228	178	73	1.14869	0.250684	1.14869	0.250684	14	14	0.26491		237	198	93	0.523723	0.600472	0.523723	0.600472	15	14	0.620867		260	175	70	1.52753	0.126631	1.52753	0.126631	15	14	0.1337		269	166	61
1552.7	6440.41	0.19251	244	191	86	0.829228	0.406976	0.829228	0.406976	15	14	0.425262		227	179	74	1.10274	0.270139	1.10274	0.270139	14	14	0.285176		236	199	94	0.480079	0.631171	0.480079	0.631171	15	14	0.651619		259	176	71	1.48388	0.137841	1.48388	0.137841	15	14	0.145619		270	165	60
1554.63	6432.42	0.192749	244	191	86	0.829228	0.406976	0.829228	0.406976	15	14	0.425262		227	179	74	1.10274	0.270139	1.10274	0.270139	14	14	0.285176		237	198	93	0.523723	0.600472	0.523723	0.600472	15	14	0.620867		259	176	71	1.48388	0.137841	1.48388	0.137841	15	14	0.145619		270	165	60
1556.55	6424.45	0.192988	244	191	86	0.829228	0.406976	0.829228	0.406976	15	14	0.425262		229	177	72	1.19464	0.232229	1.19464	0.232229	14	14	0.24563		237	198	93	0.523723	0.600472	0.523723	0.600472	15	14	0.620867		259	176	71	1.48388	0.137841	1.48388	0.137841	15	14	0.145619		269	166	61
1558.48	6416.49	0.193227	243	192	87	0.785584	0.432112	0.785584	0.432112	15	14	0.450872		230	176	71	1.24059	0.214759	1.24059	0.214759	14	14	0.227321		236	199	94	0.480079	0.631171	0.480079	0.631171	15	14	0.651619		259	176	71	1.48388	0.137841	1.48388	0.137841	15	14	0.145619		268	167	62
1560.41	6408.56	0.193466	242	193	88	0.741941	0.458124	0.741941	0.458124	15	14	0.477307		228	178	73	1.14869	0.250684	1.14869	0.250684	14	14	0.26491		237	198	93	0.523723	0.600472	0.523723	0.600472	15	14	0.620867		259	176	71	1.48388	0.137841	1.48388	0.137841	15	14	0.145619		267	168	63
1562.34	6400.65	0.193706	245	190	85	0.872872	0.382734	0.872872	0.382734	15	14	0.400494		228	178	73	1.14869	0.250684	1.14869	0.250684	14	14	0.26491		237	198	93	0.523723	0.600472	0.523723	0.600472	15	14	0.620867		260	175	70	1.52753	0.126631	1.52753	0.126631	15	14	0.1337		269	166	61
1564.27	6392.76	0.193945	244	191	86	0.829228	0.406976	0.829228	0.406976	15	14	0.425262		228	178	73	1.14869	0.250684	1.14869	0.250684	14	14	0.26491		237	198	93	0.523723	0.600472	0.523723	0.600472	15	14	0.620867		260	175	70	1.52753	0.126631	1.52753	0.126631	15	14	0.1337		269	166	61
1566.2	6384.89	0.194184	244	191	86	0.829228	0.406976	0.829228	0.406976	15	14	0.425262		227	179	74	1.10274	0.270139	1.10274	0.270139	14	14	0.285176		236	199	94	0.480079	0.631171	0.480079	0.631171	15	14	0.651619		260	175	70	1.52753	0.126631	1.52753	0.126631	15	14	0.1337		269	166	61
1568.13	6377.03	0.194423	244	191	86	0.829228	0.406976	0.829228	0.406976	15	14	0.425262		227	179	74	1.10274	0.270139	1.10274	0.270139	14	14	0.285176		236	199	94	0.480079	0.631171	0.480079	0.631171	15	14	0.651619		260	175	70	1.52753	0.126631	1.52753	0.126631	15	14	0.1337		269	166	61
1570.06	6369.2	0.194662	243	192	87	0.785584	0.432112	0.785584	0.432112	15	14	0.450872		228	178	73	1.14869	0.250684	1.14869	0.250684	14	14	0.26491		235	200	95	0.436436	0.662521	0.436436	0.662521	15	14	0.682954		261	174	69	1.57117	0.116144	1.57117	0.116144	15	14	0.122524		267	168	63
1571.99	6361.38	0.194901	243	192	87	0.785584	0.432112	0.785584	0.432112	15	14	0.450872		230	176	71	1.24059	0.214759	1.24059	0.214759	14	14	0.227321		235	200	95	0.436436	0.662521	0.436436	0.662521	15	14	0.682954		261	174	69	1.57117	0.116144	1.57117	0.116144	15	14	0.122524		268	167	62
1573.91	6353.59	0.19514	243	192	87	0.785584	0.432112	0.785584	0.432112	15	14	0.450872		229	177	72	1.19464	0.232229	1.19464	0.232229	14	14	0.24563		235	200	95	0.436436	0.662521	0.436436	0.662521	15	14	0.682954		261	174	69	1.57117	0.116144	1.57117	0.116144	15	14	0.122524		270	165	60
1575.84	6345.81	0.19538	245	190	85	0.87287	0.382734	0.87287	0.382734	15	14	0.400494		230	176	71	1.24059	0.214759	1.24059	0.214759	14	14	0.227321		234	201	96	0.39279	0.694473	0.39279	0.694473	15	14	0.71483		260	175	70	1.52753	0.126631	1.52753	0.126631	15	14	0.1337		268	167	62
1577.77	6338.05	0.195619	245	190	85	0.87287	0.382734	0.87287	0.382734	15	14	0.400494		229	177	72	1.19464	0.232229	1.19464	0.232229	14	14	0.24563		234	201	96	0.39279	0.694473	0.39279	0.694473	15	14	0.71483		259	176	71	1.48388	0.137841	1.48388	0.137841	15	14	0.145619		266	169	64
1579.7	6330.31	0.195858	245	190	85	0.87287	0.382734	0.87287	0.382734	15	14	0.400494		229	177	72	1.19464	0.232229	1.19464	0.232229	14	14	0.24563		235	200	95	0.43644	0.662521	0.43644	0.662521	15	14	0.682954		260	175	70	1.52753	0.126631	1.52753	0.126631	15	14	0.1337		267	168	63
1581.63	6322.59	0.196097	245	190	85	0.87287	0.382734	0.87287	0.382734	15	14	0.400494		229	177	72	1.19464	0.232229	1.19464	0.232229	14	14	0.24563		235	200	95	0.43644	0.662521	0.43644	0.662521	15	14	0.682954		259	176	71	1.48388	0.137841	1.48388	0.137841	15	14	0.145619		267	168	63
1583.56	6314.89	0.196336	245	190	85	0.87287	0.382734	0.87287	0.382734	15	14	0.400494		230	176	71	1.24059	0.214759	1.24059	0.214759	14	14	0.227321		235	200	95	0.43644	0.662521	0.43644	0.662521	15	14	0.682954		259	176	71	1.48388	0.137841	1.48388	0.137841	15	14	0.145619		267	168	63
1585.49	6307.21	0.196575	245	190	85	0.87287	0.382734	0.87287	0.382734	15	14	0.400494		229	177	72	1.19464	0.232229	1.19464	0.232229	14	14	0.24563		235	200	95	0.43644	0.662521	0.43644	0.662521	15	14	0.682954		259	176	71	1.48388	0.137841	1.48388	0.137841	15	14	0.145619		266	169	64
1587.42	6299.55	0.196814	246	189	84	0.91652	0.359397	0.91652	0.359397	15	14	0.376588		230	176	71	1.24059	0.214759	1.24059	0.214759	14	14	0.227321		234	201	96	0.39279	0.694473	0.39279	0.694473	15	14	0.71483		259	176	71	1.48388	0.137841	1.48388	0.137841	15	14	0.145619		266	169	64
1589.34	6291.9	0.197054	245	190	85	0.87287	0.382734	0.87287	0.382734	15	14	0.400494		230	176	71	1.24059	0.214759	1.24059	0.214759	14	14	0.227321		231	204	99	0.26186	0.793428	0.26186	0.793428	15	14	0.813179		259	176	71	1.48388	0.137841	1.48388	0.137841	15	14	0.145619		265	170	65
1591.27	6284.28	0.197293	241	194	89	0.6983	0.484992	0.6983	0.484992	15	14	0.504539		228	178	73	1.14869	0.250684	1.14869	0.250684	14	14	0.26491		230	205	100	0.21822	0.827259	0.21822	0.827259	15	14	0.846694		262	173	68	1.61481	0.106352	1.61481	0.106352	15	14	0.11207		263	172	67
1593.2	6276.67	0.197532	239	196	91	0.61101	0.541193	0.61101	0.541193	15	14	0.561291		227	179	74	1.10274	0.270139	1.10274	0.270139	14	14	0.285176		230	205	100	0.21822	0.827259	0.21822	0.827259	15	14	0.846694		260	175	70	1.52753	0.126631	1.52753	0.126631	15	14	0.1337		263	172	67
1595.13	6269.08	0.197771	237	198	93	0.52372	0.600472	0.52372	0.600472	15	14	0.620867		225	181	76	1.01085	0.312089	1.01085	0.312089	14	14	0.328667		229	206	101	0.17457	0.861414	0.17457	0.861414	15	14	0.880478		262	173	68	1.61481	0.106352	1.61481	0.106352	15	14	0.11207		262	173	68
1597.06	6261.51	0.19801	235	200	95	0.43644	0.662521	0.43644	0.662521	15	14	0.682954		223	183	78	0.91895	0.358121	0.91895	0.358121	14	14	0.376095		228	207	102	0.13093	0.89583	0.13093	0.89583	15	14	0.914475		259	176	71	1.48388	0.137841	1.48388	0.137841	15	14	0.145619		261	174	69
1598.99	6253.95	0.198249	236	199	94	0.48008	0.631171	0.48008	0.631171	15	14	0.651619		221	185	80	0.82706	0.408205	0.82706	0.408205	14	14	0.427387		226	209	104	0.04364	0.965189	0.04364	0.965189	15	14	0.982865		257	178	73	1.39659	0.162537	1.39659	0.162537	15	14	0.171789		257	178	73
1600.92	6246.42	0.198488	229	206	101	0.17457	0.861414	0.17457	0.861414	15	14	0.880478		219	187	82	0.73516	0.462241	0.73516	0.462241	14	14	0.482401		220	215	100	-0.21822	0.827259	-0.21822	0.827259	15	14	0.846694		254	181	76	1.26566	0.205634	1.26566	0.205634	15	14	0.217176		252	183	78
1602.85	6238.9	0.198728	230	205	100	0.21822	0.827259	0.21822	0.827259	15	14	0.846694		221	185	80	0.82706	0.408205	0.82706	0.408205	14	14	0.427387		221	214	101	-0.17457	0.861414	-0.17457	0.861414	15	14	0.880478		254	181	76	1.26566	0.205634	1.26566	0.205634	15	14	0.217176		253	182	77
1604.77	6231.4	0.198967	231	204	99	0.26186	0.793428	0.26186	0.793428	15	14	0.813179		221	185	80	0.82706	0.408205	0.82706	0.408205	14	14	0.427387		222	213	102	-0.13093	0.89583	-0.13093	0.89583	15	14	0.914475		252	183	78	1.17838	0.238647	1.17838	0.238647	15	14	0.251712		250	185	80
1606.7	6223.92	0.199206	230	205	100	0.21822	0.827259	0.21822	0.827259	15	14	0.846694		221	185	80	0.82706	0.408205	0.82706	0.408205	14	14	0.427387		223	212	103	-0.08729	0.930443	-0.08729	0.930443	15	14	0.948623		252	183	78	1.17838	0.238647	1.17838	0.238647	15	14	0.251712		250	185	80
1608.63	6216.46	0.199445	233	202	97	0.34915	0.726978	0.34915	0.726978	15	14	0.747192		219	187	82	0.73516	0.462241	0.73516	0.462241	14	14	0.482401		224	211	104	-0.04364	0.965189	-0.04364	0.965189	15	14	0.982865		253	182	77	1.22202	0.221701	1.22202	0.221701	15	14	0.234007		248	187	82
1610.56	6209.02	0.199684	240	195	90	0.65465	0.512691	0.65465	0.512691	15	14	0.532545		220	186	81	0.78111	0.434738	0.78111	0.434738	14	14	0.454438		228	207	102	0.13093	0.89583	0.13093	0.89583	15	14	0.914475		256	179	74	1.35295	0.176072	1.35295	0.176072	15	14	0.186083		247	188	83
1612.49	6201.59	0.199923	234	201	96	0.39279	0.694473	0.39279	0.694473	15	14	0.71483		216	190	85	0.59732	0.550294	0.59732	0.550294	14	14	0.57142		221	214	101	-0.17457	0.861414	-0.17457	0.861414	15	14	0.880478		249	186	81	1.04745	0.294895	1.04745	0.294895	15	14	0.310143		242	193	88
1614.42	6194.18	0.200162	227	208	103	0.08729	0.930443	0.08729	0.930443	15	14	0.948623		217	189	84	0.64327	0.520051	0.64327	0.520051	14	14	0.540927		224	211	104	-0.04364	0.965189	-0.04364	0.965189	15	14	0.982865		247	188	83	0.96016	0.336976	0.96016	0.336976	15	14	0.353554		241	194	89
1616.35	6186.79	0.200402	226	209	104	0.04364	0.965189	0.04364	0.965189	15	14	0.982865		216	190	85	0.59732	0.550294	0.59732	0.550294	14	14	0.57142		220	215	100	-0.21822	0.827259	-0.21822	0.827259	15	14	0.846694		237	198	93	0.52372	0.600472	0.52372	0.600472	15	14	0.620867		245	190	85
1618.28	6179.41	0.200641	225	210	105	0	1	0	1	15	14	1.01713		207	199	94	0.18379	0.854178	0.18379	0.854178	14	14	0.874287		214	221	94	-0.48008	0.631171	-0.48008	0.631171	15	14	0.651619		235	200	95	0.43644	0.662521	0.43644	0.662521	15	14	0.682954		243	192	87
1620.21	6172.06	0.20088	204	231	84	-0.91652	0.359397	-0.91652	0.359397	15	14	0.376588		187	219	82	-0.73516	0.462241	-0.73516	0.462241	14	14	0.482401		187	248	67	-1.65846	0.097226	-1.65846	0.097226	15	14	0.102309		197	238	77	-1.22202	0.221701	-1.22202	0.221701	15	14	0.234007		241	194	89
1622.13	6164.72	0.201119	186	249	66	-1.7021	0.088738	-1.7021	0.088738	15	14	0.093216		181	225	76	-1.01085	0.312089	-1.01085	0.312089	14	14	0.328667		185	250	65	-1.74574	0.080857	-1.74574	0.080857	15	14	0.084761		205	230	85	-0.87287	0.382734	-0.87287	0.382734	15	14	0.400494		227	208	103
1624.06	6157.4	0.201358	218	217	98	-0.30551	0.759982	-0.30551	0.759982	15	14	0.779995		198	208	93	-0.22974	0.818295	-0.22974	0.818295	14	14	0.83879		203	232	83	-0.96016	0.336976	-0.96016	0.336976	15	14	0.353554		241	194	89	0.698297	0.484992	0.698297	0.484992	15	14	0.504539		234	201	96
1625.99	6150.09	0.201597	206	229	86	-0.82923	0.406976	-0.82923	0.406976	15	14	0.425262		193	213	88	-0.45948	0.645892	-0.45948	0.645892	14	14	0.667331		185	250	65	-1.74574	0.080857	-1.74574	0.080857	15	14	0.084761		234	201	96	0.392792	0.694473	0.392792	0.694473	15	14	0.71483		230	205	100
1627.92	6142.81	0.201836	212	223	92	-0.56737	0.570466	-0.56737	0.570466	15	14	0.590745		195	211	90	-0.36758	0.713186	-0.36758	0.713186	14	14	0.73446		197	238	77	-1.22202	0.221701	-1.22202	0.221701	15	14	0.234007		225	210	105	0	1	0	1	15	14	1.01713		220	215	100
1629.85	6135.54	0.202076	194	241	74	-1.35295	0.176072	-1.35295	0.176072	15	14	0.186083		195	211	90	-0.36758	0.713186	-0.36758	0.713186	14	14	0.73446		190	245	70	-1.52753	0.126631	-1.52753	0.126631	15	14	0.1337		224	211	104	-0.043644	0.965189	-0.043649	0.965184	15	14	0.982865		218	217	98
1631.78	6128.28	0.202315	204	231	84	-0.91652	0.359397	-0.91652	0.359397	15	14	0.376588		204	202	97	0.04595	0.963352	0.04595	0.963352	14	14	0.981969		195	240	75	-1.30931	0.190431	-1.30931	0.190431	15	14	0.201205		228	207	102	0.130931	0.89583	0.130931	0.89583	15	14	0.914475		230	205	100
1633.71	6121.05	0.202554	215	220	95	-0.43644	0.662521	-0.43644	0.662521	15	14	0.682954		201	205	96	-0.0919	0.926781	-0.0919	0.926781	14	14	0.945946		209	226	89	-0.6983	0.484992	-0.6983	0.484992	15	14	0.504539		233	202	97	0.349149	0.726978	0.349149	0.726978	15	14	0.747192		252	183	78
1635.64	6113.83	0.202793	240	195	90	0.65465	0.512691	0.65465	0.512691	15	14	0.532545		207	199	94	0.18379	0.854178	0.18379	0.854178	14	14	0.874287		224	211	104	-0.04364	0.965189	-0.04364	0.965189	15	14	0.982865		243	192	87	0.785584	0.432112	0.785584	0.432112	15	14	0.450872		269	166	61
1637.56	6106.63	0.203032	240	195	90	0.65465	0.512691	0.65465	0.512691	15	14	0.532545		225	181	76	1.01085	0.312089	1.01085	0.312089	14	14	0.328667		218	217	98	-0.30551	0.759982	-0.30551	0.759982	15	14	0.779995		259	176	71	1.48388	0.137841	1.48388	0.137841	15	14	0.145619		264	171	66
1639.49	6099.44	0.203271	241	194	89	0.6983	0.484992	0.6983	0.484992	15	14	0.504539		216	190	85	0.59732	0.550294	0.59732	0.550294	14	14	0.57142		227	208	103	0.08729	0.930443	0.08729	0.930443	15	14	0.948623		255	180	75	1.30931	0.190431	1.30931	0.190431	15	14	0.201205		261	174	69
1641.42	6092.28	0.20351	234	201	96	0.39279	0.694473	0.39279	0.694473	15	14	0.71483		233	173	68	1.37843	0.168071	1.37843	0.168071	14	14	0.178112		215	220	95	-0.43644	0.662521	-0.43644	0.662521	15	14	0.682954		245	190	85	0.872872	0.382734	0.872872	0.382734	15	14	0.400494		254	181	76
1643.35	6085.13	0.20375	238	197	92	0.56737	0.570466	0.56737	0.570466	15	14	0.590745		212	194	89	0.41353	0.679219	0.41353	0.679219	14	14	0.700611		217	218	97	-0.34915	0.726978	-0.34915	0.726978	15	14	0.747192		241	194	89	0.698297	0.484992	0.698297	0.484992	15	14	0.504539		260	175	70
1645.28	6077.99	0.203989	238	197	92	0.56737	0.570466	0.56737	0.570466	15	14	0.590745		205	201	96	0.0919	0.926781	0.0919	0.926781	14	14	0.945946		213	222	93	-0.52372	0.600472	-0.52372	0.600472	15	14	0.620867		235	200	95	0.436436	0.662521	0.436436	0.662521	15	14	0.682954		255	180	75
1647.21	6070.88	0.204228	237	198	93	0.52372	0.600472	0.52372	0.600472	15	14	0.620867		194	212	89	-0.41353	0.679219	-0.41353	0.679219	14	14	0.700611		216	219	96	-0.39279	0.694473	-0.39279	0.694473	15	14	0.71483		230	205	100	0.218218	0.827259	0.218218	0.827259	15	14	0.846694		244	191	86
1649.14	6063.78	0.204467	227	208	103	0.08729	0.930443	0.08729	0.930443	15	14	0.948623		197	209	92	-0.27569	0.782789	-0.27569	0.782789	14	14	0.803613		212	223	92	-0.56737	0.570466	-0.56737	0.570466	15	14	0.590745		235	200	95	0.436436	0.662521	0.436436	0.662521	15	14	0.682954		250	185	80
1651.07	6056.69	0.204706	248	187	82	1.0038	0.315475	1.0038	0.315475	15	14	0.331405		196	210	91	-0.32163	0.74773	-0.32163	0.74773	14	14	0.768812		220	215	100	-0.21822	0.827259	-0.21822	0.827259	15	14	0.846694		239	196	91	0.61101	0.541193	0.61101	0.541193	15	14	0.561291		269	166	61
1653	6049.62	0.204945	235	200	95	0.43644	0.662521	0.43644	0.662521	15	14	0.682954		194	212	89	-0.41353	0.679219	-0.41353	0.679219	14	14	0.700611		215	220	95	-0.43644	0.662521	-0.43644	0.662521	15	14	0.682954		232	203	98	0.305505	0.759982	0.305505	0.759982	15	14	0.779995		263	172	67
1654.92	6042.57	0.205184	232	203	98	0.30551	0.759982	0.30551	0.759982	15	14	0.779995		206	200	95	0.13784	0.890365	0.13784	0.890365	14	14	0.910026		214	221	94	-0.48008	0.631171	-0.48008	0.631171	15	14	0.651619		245	190	85	0.872872	0.382734	0.872872	0.382734	15	14	0.400494		267	168	63
1656.85	6035.54	0.205424	219	216	99	-0.26186	0.793428	-0.26186	0.793428	15	14	0.813179		209	197	92	0.27569	0.782789	0.27569	0.782789	14	14	0.803613		200	235	80	-1.09109	0.275234	-1.09109	0.275234	15	14	0.289776		244	191	86	0.829228	0.406976	0.829228	0.406976	15	14	0.425262		267	168	63
1658.78	6028.52	0.205663	214	221	94	-0.48008	0.631171	-0.48008	0.631171	15	14	0.651619		195	211	90	-0.36758	0.713186	-0.36758	0.713186	14	14	0.73446		207	228	87	-0.78558	0.432112	-0.78558	0.432112	15	14	0.450872		237	198	93	0.523723	0.600472	0.523723	0.600472	15	14	0.620867		257	178	73
1660.71	6021.52	0.205902	194	241	74	-1.35295	0.176072	-1.35295	0.176072	15	14	0.186083		180	226	75	-1.0568	0.290605	-1.0568	0.290605	14	14	0.306426		185	250	65	-1.74574	0.080857	-1.74574	0.080857	15	14	0.084761		227	208	103	0.087287	0.930443	0.087287	0.930443	15	14	0.948623		244	191	86
1662.64	6014.53	0.206141	201	234	81	-1.04745	0.294895	-1.04745	0.294895	15	14	0.310143		193	213	88	-0.45948	0.645892	-0.45948	0.645892	14	14	0.667331		187	248	67	-1.65846	0.097226	-1.65846	0.097226	15	14	0.102309		230	205	100	0.218218	0.827259	0.218218	0.827259	15	14	0.846694		237	198	93
1664.57	6007.56	0.20638	176	259	56	-2.13854	0.032474	-2.13854	0.032474	15	14	0.03277		180	226	75	-1.0568	0.290605	-1.0568	0.290605	14	14	0.306426		170	265	50	-2.4004	0.016378	-2.4004	0.016378	15	14	0.015684		218	217	98	-0.305505	0.759982	-0.305505	0.759982	15	14	0.779995		235	200	95
1666.5	6000.61	0.206619	194	241	74	-1.35295	0.176072	-1.35295	0.176072	15	14	0.186083		188	218	83	-0.68922	0.490688	-0.68922	0.490688	14	14	0.511239		173	262	53	-2.26947	0.023241	-2.26947	0.023241	15	14	0.022923		225	210	105	0	1	0	1	15	14	1.01713		229	206	101
1668.43	5993.67	0.206858	191	244	71	-1.48388	0.137841	-1.48388	0.137841	15	14	0.145619		186	220	81	-0.78111	0.434738	-0.78111	0.434738	14	14	0.454438		169	266	49	-2.44404	0.014524	-2.44404	0.014524	15	14	0.013749		224	211	104	-0.043644	0.965189	-0.043644	0.965189	15	14	0.982865		223	212	103
1670.35	5986.75	0.207098	184	251	64	-1.78939	0.073553	-1.78939	0.073553	15	14	0.076919		181	225	76	-1.01085	0.312089	-1.01085	0.312089	14	14	0.328667		167	268	47	-2.53133	0.011364	-2.53133	0.011364	15	14	0.010482		212	223	92	-0.567367	0.570466	-0.567367	0.570466	15	14	0.590745		222	213	102
1672.28	5979.85	0.207337	201	234	81	-1.04745	0.294895	-1.04745	0.294895	15	14	0.310143		198	208	93	-0.229738	0.818295	-0.229738	0.818295	14	14	0.83879		197	238	77	-1.22202	0.221701	-1.22202	0.221701	15	14	0.234007		240	195	90	0.654654	0.512691	0.654654	0.512691	15	14	0.532545		247	188	83
1674.21	5972.96	0.207576	208	227	88	-0.74194	0.458124	-0.74194	0.458124	15	14	0.477307		204	202	97	0.045948	0.963352	0.045948	0.963352	14	14	0.981969		202	233	82	-1.0038	0.315475	-1.0038	0.315475	15	14	0.331405		249	186	81	1.04745	0.294895	1.04745	0.294895	15	14	0.310143		252	183	78
1676.14	5966.08	0.207815	231	204	99	0.26186	0.793428	0.26186	0.793428	15	14	0.813179		214	192	87	0.505424	0.613261	0.505424	0.613261	14	14	0.634669		218	217	98	-0.30551	0.759982	-0.30551	0.759982	15	14	0.779995		242	193	88	0.741941	0.458124	0.741941	0.458124	15	14	0.477307		246	189	84
1678.07	5959.23	0.208054	232	203	98	0.30551	0.759982	0.30551	0.759982	15	14	0.779995		218	188	83	0.689215	0.490688	0.689215	0.490688	14	14	0.511239		217	218	97	-0.34915	0.726978	-0.34915	0.726978	15	14	0.747192		247	188	83	0.960159	0.336976	0.960159	0.336976	15	14	0.353554		241	194	89
1680	5952.39	0.208293	230	205	100	0.21822	0.827259	0.21822	0.827259	15	14	0.846694		221	185	80	0.827058	0.408205	0.827058	0.408205	14	14	0.427387		219	216	99	-0.26186	0.793428	-0.26186	0.793428	15	14	0.813179		245	190	85	0.872872	0.382734	0.872872	0.382734	15	14	0.400494		244	191	86
1681.93	5945.56	0.208532	226	209	104	0.04364	0.965189	0.04364	0.965189	15	14	0.982865		219	187	82	0.735163	0.462241	0.735163	0.462241	14	14	0.482401		220	215	100	-0.21822	0.827259	-0.21822	0.827259	15	14	0.846694		243	192	87	0.785584	0.432112	0.785584	0.432112	15	14	0.450872		242	193	88
1683.86	5938.75	0.208772	230	205	100	0.21822	0.827259	0.21822	0.827259	15	14	0.846694		223	183	78	0.918954	0.358121	0.918954	0.358121	14	14	0.376095		217	218	97	-0.34915	0.726978	-0.34915	0.726978	15	14	0.747192		241	194	89	0.698297	0.484992	0.698297	0.484992	15	14	0.504539		245	190	85
1685.79	5931.95	0.209011	231	204	99	0.26186	0.793428	0.26186	0.793428	15	14	0.813179		224	182	77	0.964901	0.334595	0.964901	0.334595	14	14	0.35189		222	213	102	-0.13093	0.89583	-0.13093	0.89583	15	14	0.914475		246	189	84	0.916515	0.359397	0.916515	0.359397	15	14	0.376588		249	186	81
1687.71	5925.17	0.20925	235	200	95	0.43644	0.662521	0.43644	0.662521	15	14	0.682954		221	185	80	0.827058	0.408205	0.827058	0.408205	14	14	0.427387		221	214	101	-0.17457	0.861414	-0.17457	0.861414	15	14	0.880478		248	187	82	1.0038	0.315475	1.0038	0.315475	15	14	0.331405		251	184	79
1689.64	5918.41	0.209489	235	200	95	0.43644	0.662521	0.43644	0.662521	15	14	0.682954		221	185	80	0.827058	0.408205	0.827058	0.408205	14	14	0.427387		221	214	101	-0.17457	0.861414	-0.17457	0.861414	15	14	0.880478		248	187	82	1.0038	0.315475	1.0038	0.315475	15	14	0.331405		251	184	79
1691.57	5911.66	0.209728	241	194	89	0.6983	0.484992	0.6983	0.484992	15	14	0.504539		223	183	78	0.918954	0.358121	0.918954	0.358121	14	14	0.376095		232	203	98	0.30551	0.759982	0.30551	0.759982	15	14	0.779995		255	180	75	1.30931	0.190431	1.30931	0.190431	15	14	0.201205		264	171	66
1693.5	5904.93	0.209967	241	194	89	0.6983	0.484992	0.6983	0.484992	15	14	0.504539		229	177	72	1.19464	0.232229	1.19464	0.232229	14	14	0.24563		229	206	101	0.17457	0.861414	0.17457	0.861414	15	14	0.880478		259	176	71	1.48388	0.137841	1.48388	0.137841	15	14	0.145619		267	168	63
1695.43	5898.21	0.210206	242	193	88	0.74194	0.458124	0.74194	0.458124	15	14	0.477307		230	176	71	1.24059	0.214759	1.24059	0.214759	14	14	0.227321		229	206	101	0.17457	0.861414	0.17457	0.861414	15	14	0.880478		259	176	71	1.48388	0.137841	1.48388	0.137841	15	14	0.145619		267	168	63
1697.36	5891.51	0.210446	244	191	86	0.82923	0.406976	0.82923	0.406976	15	14	0.425262		231	175	70	1.28653	0.198257	1.28653	0.198257	14	14	0.209978		232	203	98	0.30551	0.759982	0.30551	0.759982	15	14	0.779995		262	173	68	1.61481	0.106352	1.61481	0.106352	15	14	0.11207		270	165	60
1699.29	5884.82	0.210685	246	189	84	0.91652	0.359397	0.91652	0.359397	15	14	0.376588		232	174	69	1.33248	0.182703	1.33248	0.182703	14	14	0.193579		234	201	96	0.39279	0.694473	0.39279	0.694473	15	14	0.71483		261	174	69	1.57117	0.116144	1.57117	0.116144	15	14	0.122524		268	167	62
1701.22	5878.15	0.210924	247	188	83	0.96016	0.336976	0.96016	0.336976	15	14	0.353554		229	177	72	1.19464	0.232229	1.19464	0.232229	14	14	0.24563		235	200	95	0.43644	0.662521	0.43644	0.662521	15	14	0.682954		260	175	70	1.52753	0.126631	1.52753	0.126631	15	14	0.1337		268	167	62
1703.14	5871.49	0.211163	247	188	83	0.96016	0.336976	0.96016	0.336976	15	14	0.353554		229	177	72	1.19464	0.232229	1.19464	0.232229	14	14	0.24563		238	197	92	0.56737	0.570466	0.56737	0.570466	15	14	0.590745		260	175	70	1.52753	0.126631	1.52753	0.126631	15	14	0.1337		267	168	63
1705.07	5864.85	0.211402	245	190	85	0.87287	0.382734	0.87287	0.382734	15	14	0.400494		231	175	70	1.28653	0.198257	1.28653	0.198257	14	14	0.209978		238	197	92	0.56737	0.570466	0.56737	0.570466	15	14	0.590745		261	174	69	1.57117	0.116144	1.57117	0.116144	15	14	0.122524		267	168	63
1707	5858.22	0.211641	246	189	84	0.91652	0.359397	0.91652	0.359397	15	14	0.376588		230	176	71	1.24059	0.214759	1.24059	0.214759	14	14	0.227321		239	196	91	0.61101	0.541193	0.61101	0.541193	15	14	0.561291		263	172	67	1.65846	0.097226	1.65846	0.097226	15	14	0.102309		271	164	59
1708.93	5851.61	0.21188	246	189	84	0.91652	0.359397	0.91652	0.359397	15	14	0.376588		231	175	70	1.28653	0.198257	1.28653	0.198257	14	14	0.209978		239	196	91	0.61101	0.541193	0.61101	0.541193	15	14	0.561291		261	174	69	1.57117	0.116144	1.57117	0.116144	15	14	0.122524		269	166	61
1710.86	5845.01	0.21212	246	189	84	0.91652	0.359397	0.91652	0.359397	15	14	0.376588		231	175	70	1.28653	0.198257	1.28653	0.198257	14	14	0.209978		239	196	91	0.61101	0.541193	0.61101	0.541193	15	14	0.561291		261	174	69	1.57117	0.116144	1.57117	0.116144	15	14	0.122524		272	163	58
1712.79	5838.43	0.212359	245	190	85	0.87287	0.382734	0.87287	0.382734	15	14	0.400494		230	176	71	1.24059	0.214759	1.24059	0.214759	14	14	0.227321		238	197	92	0.56737	0.570466	0.56737	0.570466	15	14	0.590745		260	175	70	1.52753	0.126631	1.52753	0.126631	15	14	0.1337		271	164	59
1714.72	5831.86	0.212598	245	190	85	0.87287	0.382734	0.87287	0.382734	15	14	0.400494		231	175	70	1.28653	0.198257	1.28653	0.198257	14	14	0.209978		238	197	92	0.56737	0.570466	0.56737	0.570466	15	14	0.590745		259	176	71	1.48388	0.137841	1.48388	0.137841	15	14	0.145619		270	165	60
1716.65	5825.31	0.212837	245	190	85	0.87287	0.382734	0.87287	0.382734	15	14	0.400494		232	174	69	1.33248	0.182703	1.33248	0.182703	14	14	0.193579		239	196	91	0.61101	0.541193	0.61101	0.541193	15	14	0.561291		259	176	71	1.48388	0.137841	1.48388	0.137841	15	14	0.145619		270	165	60
1718.58	5818.77	0.213076	244	191	86	0.82923	0.406976	0.82923	0.406976	15	14	0.425262		229	177	72	1.19464	0.232229	1.19464	0.232229	14	14	0.24563		239	196	91	0.61101	0.541193	0.61101	0.541193	15	14	0.561291		262	173	68	1.61481	0.106352	1.61481	0.106352	15	14	0.11207		273	162	57
1720.5	5812.25	0.213315	245	190	85	0.872872	0.382734	0.872872	0.382734	15	14	0.400494		230	176	71	1.24059	0.214759	1.24059	0.214759	14	14	0.227321		239	196	91	0.61101	0.541193	0.61101	0.541193	15	14	0.561291		261	174	69	1.57117	0.116144	1.57117	0.116144	15	14	0.122524		272	163	58
1722.43	5805.74	0.213554	245	190	85	0.872872	0.382734	0.872872	0.382734	15	14	0.400494		229	177	72	1.19464	0.232229	1.19464	0.232229	14	14	0.24563		239	196	91	0.61101	0.541193	0.61101	0.541193	15	14	0.561291		258	177	72	1.44024	0.149801	1.44024	0.149801	15	14	0.158309		270	165	60
1724.36	5799.25	0.213794	244	191	86	0.829228	0.406976	0.829228	0.406976	15	14	0.425262		229	177	72	1.19464	0.232229	1.19464	0.232229	14	14	0.24563		239	196	91	0.61101	0.541193	0.61101	0.541193	15	14	0.561291		258	177	72	1.44024	0.149801	1.44024	0.149801	15	14	0.158309		270	165	60
1726.29	5792.77	0.214033	244	191	86	0.829228	0.406976	0.829228	0.406976	15	14	0.425262		230	176	71	1.24059	0.214759	1.24059	0.214759	14	14	0.227321		238	197	92	0.567367	0.570466	0.567367	0.570466	15	14	0.590745		258	177	72	1.44024	0.149801	1.44024	0.149801	15	14	0.158309		270	165	60
1728.22	5786.3	0.214272	245	190	85	0.872872	0.382734	0.872872	0.382734	15	14	0.400494		228	178	73	1.14869	0.250684	1.14869	0.250684	14	14	0.26491		237	198	93	0.523723	0.600472	0.523723	0.600472	15	14	0.620867		257	178	73	1.39659	0.162537	1.39659	0.162537	15	14	0.171789		270	165	60
1730.15	5779.85	0.214511	245	190	85	0.872872	0.382734	0.872872	0.382734	15	14	0.400494		230	176	71	1.24059	0.214759	1.24059	0.214759	14	14	0.227321		237	198	93	0.523723	0.600472	0.523723	0.600472	15	14	0.620867		255	180	75	1.30931	0.190431	1.30931	0.190431	15	14	0.201205		270	165	60
1732.08	5773.42	0.21475	243	192	87	0.785584	0.432112	0.785584	0.432112	15	14	0.450872		230	176	71	1.24059	0.214759	1.24059	0.214759	14	14	0.227321		236	199	94	0.480079	0.631171	0.480079	0.631171	15	14	0.651619		255	180	75	1.30931	0.190431	1.30931	0.190431	15	14	0.201205		270	165	60
1734.01	5766.99	0.214989	243	192	87	0.785584	0.432112	0.785584	0.432112	15	14	0.450872		229	177	72	1.19464	0.232229	1.19464	0.232229	14	14	0.24563		239	196	91	0.61101	0.541193	0.61101	0.541193	15	14	0.561291		254	181	76	1.26566	0.205634	1.26566	0.205634	15	14	0.217176		269	166	61
1735.93	5760.59	0.215228	244	191	86	0.829228	0.406976	0.829228	0.406976	15	14	0.425262		229	177	72	1.19464	0.232229	1.19464	0.232229	14	14	0.24563		238	197	92	0.567367	0.570466	0.567367	0.570466	15	14	0.590745		254	181	76	1.26566	0.205634	1.26566	0.205634	15	14	0.217176		269	166	61
1737.86	5754.19	0.215468	244	191	86	0.829228	0.406976	0.829228	0.406976	15	14	0.425262		227	179	74	1.10274	0.270139	1.10274	0.270139	14	14	0.285176		238	197	92	0.567367	0.570466	0.567367	0.570466	15	14	0.590745		253	182	77	1.22202	0.221701	1.22202	0.221701	15	14	0.234007		269	166	61
1739.79	5747.81	0.215707	245	190	85	0.872872	0.382734	0.872872	0.382734	15	14	0.400494		228	178	73	1.14869	0.250684	1.14869	0.250684	14	14	0.26491		238	197	92	0.567367	0.570466	0.567367	0.570466	15	14	0.590745		253	182	77	1.22202	0.221701	1.22202	0.221701	15	14	0.234007		270	165	60
1741.72	5741.45	0.215946	245	190	85	0.872872	0.382734	0.872872	0.382734	15	14	0.400494		228	178	73	1.14869	0.250684	1.14869	0.250684	14	14	0.26491		238	197	92	0.567367	0.570466	0.567367	0.570466	15	14	0.590745		253	182	77	1.22202	0.221701	1.22202	0.221701	15	14	0.234007		270	165	60
1743.65	5735.1	0.216185	244	191	86	0.829228	0.406976	0.829228	0.406976	15	14	0.425262		228	178	73	1.14869	0.250684	1.14869	0.250684	14	14	0.26491		237	198	93	0.523723	0.600472	0.523723	0.600472	15	14	0.620867		253	182	77	1.22202	0.221701	1.22202	0.221701	15	14	0.234007		270	165	60
1745.58	5728.76	0.216424	244	191	86	0.829228	0.406976	0.829228	0.406976	15	14	0.425262		227	179	74	1.10274	0.270139	1.10274	0.270139	14	14	0.285176		239	196	91	0.61101	0.541193	0.61101	0.541193	15	14	0.561291		253	182	77	1.22202	0.221701	1.22202	0.221701	15	14	0.234007		270	165	60
1747.51	5722.44	0.216663	244	191	86	0.829228	0.406976	0.829228	0.406976	15	14	0.425262		227	179	74	1.10274	0.270139	1.10274	0.270139	14	14	0.285176		237	198	93	0.523723	0.600472	0.523723	0.600472	15	14	0.620867		252	183	78	1.17838	0.238647	1.17838	0.238647	15	14	0.251712		270	165	60
1749.44	5716.13	0.216902	244	191	86	0.829228	0.406976	0.829228	0.406976	15	14	0.425262		227	179	74	1.10274	0.270139	1.10274	0.270139	14	14	0.285176		238	197	92	0.567367	0.570466	0.567367	0.570466	15	14	0.590745		252	183	78	1.17838	0.238647	1.17838	0.238647	15	14	0.251712		270	165	60
1751.36	5709.83	0.217142	243	192	87	0.785584	0.432112	0.785584	0.432112	15	14	0.450872		227	179	74	1.10274	0.270139	1.10274	0.270139	14	14	0.285176		236	199	94	0.480079	0.631171	0.480079	0.631171	15	14	0.651619		251	184	79	1.13473	0.256488	1.13473	0.256488	15	14	0.270299		268	167	62
1753.29	5703.55	0.217381	243	192	87	0.785584	0.432112	0.785584	0.432112	15	14	0.450872		227	179	74	1.10274	0.270139	1.10274	0.270139	14	14	0.285176		236	199	94	0.480079	0.631171	0.480079	0.631171	15	14	0.651619		251	184	79	1.13473	0.256488	1.13473	0.256488	15	14	0.270299		268	167	62
1755.22	5697.28	0.21762	242	193	88	0.741941	0.458124	0.741941	0.458124	15	14	0.477307		227	179	74	1.10274	0.270139	1.10274	0.270139	14	14	0.285176		236	199	94	0.480079	0.631171	0.480079	0.631171	15	14	0.651619		252	183	78	1.17838	0.238647	1.17838	0.238647	15	14	0.251712		268	167	62
1757.15	5691.03	0.217859	242	193	88	0.741941	0.458124	0.741941	0.458124	15	14	0.477307		228	178	73	1.14869	0.250684	1.14869	0.250684	14	14	0.26491		234	201	96	0.392792	0.694473	0.392792	0.694473	15	14	0.71483		251	184	79	1.13473	0.256488	1.13473	0.256488	15	14	0.270299		269	166	61
1759.08	5684.79	0.218098	242	193	88	0.741941	0.458124	0.741941	0.458124	15	14	0.477307		228	178	73	1.14869	0.250684	1.14869	0.250684	14	14	0.26491		234	201	96	0.392792	0.694473	0.392792	0.694473	15	14	0.71483		252	183	78	1.17838	0.238647	1.17838	0.238647	15	14	0.251712		268	167	62
1761.01	5678.56	0.218337	241	194	89	0.698297	0.484992	0.698297	0.484992	15	14	0.504539		227	179	74	1.10274	0.270139	1.10274	0.270139	14	14	0.285176		233	202	97	0.349149	0.726978	0.349149	0.726978	15	14	0.747192		252	183	78	1.17838	0.238647	1.17838	0.238647	15	14	0.251712		268	167	62
1762.94	5672.35	0.218576	241	194	89	0.698297	0.484992	0.698297	0.484992	15	14	0.504539		227	179	74	1.10274	0.270139	1.10274	0.270139	14	14	0.285176		232	203	98	0.305505	0.759982	0.305505	0.759982	15	14	0.779995		251	184	79	1.13473	0.256488	1.13473	0.256488	15	14	0.270299		268	167	62
1764.87	5666.15	0.218816	240	195	90	0.654654	0.512691	0.654654	0.512691	15	14	0.532545		226	180	75	1.0568	0.290605	1.0568	0.290605	14	14	0.306426		233	202	97	0.349149	0.726978	0.349149	0.726978	15	14	0.747192		252	183	78	1.17838	0.238647	1.17838	0.238647	15	14	0.251712		268	167	62
1766.8	5659.96	0.219055	240	195	90	0.654654	0.512691	0.654654	0.512691	15	14	0.532545		227	179	74	1.10274	0.270139	1.10274	0.270139	14	14	0.285176		232	203	98	0.305505	0.759982	0.305505	0.759982	15	14	0.779995		252	183	78	1.17838	0.238647	1.17838	0.238647	15	14	0.251712		268	167	62
1768.72	5653.79	0.219294	240	195	90	0.654654	0.512691	0.654654	0.512691	15	14	0.532545		228	178	73	1.14869	0.250684	1.14869	0.250684	14	14	0.26491		233	202	97	0.349149	0.726978	0.349149	0.726978	15	14	0.747192		252	183	78	1.17838	0.238647	1.17838	0.238647	15	14	0.251712		268	167	62
1770.65	5647.63	0.219533	240	195	90	0.654654	0.512691	0.654654	0.512691	15	14	0.532545		228	178	73	1.14869	0.250684	1.14869	0.250684	14	14	0.26491		232	203	98	0.305505	0.759982	0.305505	0.759982	15	14	0.779995		252	183	78	1.17838	0.238647	1.17838	0.238647	15	14	0.251712		268	167	62
1772.58	5641.49	0.219772	240	195	90	0.654654	0.512691	0.654654	0.512691	15	14	0.532545		228	178	73	1.14869	0.250684	1.14869	0.250684	14	14	0.26491		232	203	98	0.305505	0.759982	0.305505	0.759982	15	14	0.779995		250	185	80	1.09109	0.275234	1.09109	0.275234	15	14	0.289776		268	167	62
1774.51	5635.36	0.220011	240	195	90	0.654654	0.512691	0.654654	0.512691	15	14	0.532545		228	178	73	1.14869	0.250684	1.14869	0.250684	14	14	0.26491		232	203	98	0.305505	0.759982	0.305505	0.759982	15	14	0.779995		251	184	79	1.13473	0.256488	1.13473	0.256488	15	14	0.270299		267	168	63
1776.44	5629.24	0.22025	240	195	90	0.654654	0.512691	0.654654	0.512691	15	14	0.532545		228	178	73	1.14869	0.250684	1.14869	0.250684	14	14	0.26491		232	203	98	0.305505	0.759982	0.305505	0.759982	15	14	0.779995		252	183	78	1.17838	0.238647	1.17838	0.238647	15	14	0.251712		267	168	63
1778.37	5623.13	0.22049	240	195	90	0.654654	0.512691	0.654654	0.512691	15	14	0.532545		227	179	74	1.10274	0.270139	1.10274	0.270139	14	14	0.285176		231	204	99	0.261861	0.793428	0.261861	0.793428	15	14	0.813179		251	184	79	1.13473	0.256488	1.13473	0.256488	15	14	0.270299		267	168	63
1780.3	5617.04	0.220729	240	195	90	0.654654	0.512691	0.654654	0.512691	15	14	0.532545		227	179	74	1.10274	0.270139	1.10274	0.270139	14	14	0.285176		231	204	99	0.261861	0.793428	0.261861	0.793428	15	14	0.813179		249	186	81	1.04745	0.294895	1.04745	0.294895	15	14	0.310143		266	169	64
1782.23	5610.96	0.220968	240	195	90	0.654654	0.512691	0.654654	0.512691	15	14	0.532545		227	179	74	1.10274	0.270139	1.10274	0.270139	14	14	0.285176		231	204	99	0.261861	0.793428	0.261861	0.793428	15	14	0.813179		249	186	81	1.04745	0.294895	1.04745	0.294895	15	14	0.310143		266	169	64
1784.15	5604.89	0.221207	240	195	90	0.654654	0.512691	0.654654	0.512691	15	14	0.532545		227	179	74	1.10274	0.270139	1.10274	0.270139	14	14	0.285176		231	204	99	0.261861	0.793428	0.261861	0.793428	15	14	0.813179		251	184	79	1.13473	0.256488	1.13473	0.256488	15	14	0.270299		266	169	64
1786.08	5598.84	0.221446	240	195	90	0.654654	0.512691	0.654654	0.512691	15	14	0.532545		227	179	74	1.10274	0.270139	1.10274	0.270139	14	14	0.285176		231	204	99	0.261861	0.793428	0.261861	0.793428	15	14	0.813179		251	184	79	1.13473	0.256488	1.13473	0.256488	15	14	0.270299		266	169	64
1788.01	5592.8	0.221685	240	195	90	0.654654	0.512691	0.654654	0.512691	15	14	0.532545		226	180	75	1.0568	0.290605	1.0568	0.290605	14	14	0.306426		231	204	99	0.261861	0.793428	0.261861	0.793428	15	14	0.813179		250	185	80	1.09109	0.275234	1.09109	0.275234	15	14	0.289776		266	169	64
1789.94	5586.78	0.221924	239	196	91	0.61101	0.541193	0.61101	0.541193	15	14	0.561291		227	179	74	1.10274	0.270139	1.10274	0.270139	14	14	0.285176		231	204	99	0.261861	0.793428	0.261861	0.793428	15	14	0.813179		250	185	80	1.09109	0.275234	1.09109	0.275234	15	14	0.289776		267	168	63
1791.87	5580.76	0.222164	239	196	91	0.61101	0.541193	0.61101	0.541193	15	14	0.561291		226	180	75	1.0568	0.290605	1.0568	0.290605	14	14	0.306426		229	206	101	0.174574	0.861414	0.174574	0.861414	15	14	0.880478		250	185	80	1.09109	0.275234	1.09109	0.275234	15	14	0.289776		266	169	64
1793.8	5574.76	0.222403	239	196	91	0.61101	0.541193	0.61101	0.541193	15	14	0.561291		226	180	75	1.0568	0.290605	1.0568	0.290605	14	14	0.306426		229	206	101	0.174574	0.861414	0.174574	0.861414	15	14	0.880478		250	185	80	1.09109	0.275234	1.09109	0.275234	15	14	0.289776		266	169	64
1795.73	5568.77	0.222642	239	196	91	0.61101	0.541193	0.61101	0.541193	15	14	0.561291		227	179	74	1.10274	0.270139	1.10274	0.270139	14	14	0.285176		229	206	101	0.174574	0.861414	0.174574	0.861414	15	14	0.880478		252	183	78	1.17838	0.238647	1.17838	0.238647	15	14	0.251712		266	169	64
1797.66	5562.8	0.222881	239	196	91	0.61101	0.541193	0.61101	0.541193	15	14	0.561291		227	179	74	1.10274	0.270139	1.10274	0.270139	14	14	0.285176		230	205	100	0.218218	0.827259	0.218218	0.827259	15	14	0.846694		252	183	78	1.17838	0.238647	1.17838	0.238647	15	14	0.251712		266	169	64
1799.59	5556.84	0.22312	239	196	91	0.61101	0.541193	0.61101	0.541193	15	14	0.561291		227	179	74	1.10274	0.270139	1.10274	0.270139	14	14	0.285176		230	205	100	0.218218	0.827259	0.218218	0.827259	15	14	0.846694		252	183	78	1.17838	0.238647	1.17838	0.238647	15	14	0.251712		266	169	64
1801.51	5550.89	0.223359	239	196	91	0.61101	0.541193	0.61101	0.541193	15	14	0.561291		227	179	74	1.10274	0.270139	1.10274	0.270139	14	14	0.285176		229	206	101	0.174574	0.861414	0.174574	0.861414	15	14	0.880478		252	183	78	1.17838	0.238647	1.17838	0.238647	15	14	0.251712		266	169	64
1803.44	5544.95	0.223598	240	195	90	0.654654	0.512691	0.654654	0.512691	15	14	0.532545		227	179	74	1.10274	0.270139	1.10274	0.270139	14	14	0.285176		229	206	101	0.174574	0.861414	0.174574	0.861414	15	14	0.880478		252	183	78	1.17838	0.238647	1.17838	0.238647	15	14	0.251712		266	169	64
1805.37	5539.03	0.223838	240	195	90	0.654654	0.512691	0.654654	0.512691	15	14	0.532545		227	179	74	1.10274	0.270139	1.10274	0.270139	14	14	0.285176		230	205	100	0.218218	0.827259	0.218218	0.827259	15	14	0.846694		251	184	79	1.13473	0.256488	1.13473	0.256488	15	14	0.270299		265	170	65
1807.3	5533.11	0.224077	240	195	90	0.654654	0.512691	0.654654	0.512691	15	14	0.532545		226	180	75	1.0568	0.290605	1.0568	0.290605	14	14	0.306426		230	205	100	0.218218	0.827259	0.218218	0.827259	15	14	0.846694		252	183	78	1.17838	0.238647	1.17838	0.238647	15	14	0.251712		265	170	65
1809.23	5527.22	0.224316	239	196	91	0.61101	0.541193	0.61101	0.541193	15	14	0.561291		227	179	74	1.10274	0.270139	1.10274	0.270139	14	14	0.285176		229	206	101	0.174574	0.861414	0.174574	0.861414	15	14	0.880478		252	183	78	1.17838	0.238647	1.17838	0.238647	15	14	0.251712		266	169	64
1811.16	5521.33	0.224555	240	195	90	0.654654	0.512691	0.654654	0.512691	15	14	0.532545		227	179	74	1.10274	0.270139	1.10274	0.270139	14	14	0.285176		228	207	102	0.130931	0.89583	0.130931	0.89583	15	14	0.914475		250	185	80	1.09109	0.275234	1.09109	0.275234	15	14	0.289776		265	170	65
1813.09	5515.46	0.224794	240	195	90	0.654654	0.512691	0.654654	0.512691	15	14	0.532545		227	179	74	1.10274	0.270139	1.10274	0.270139	14	14	0.285176		228	207	102	0.130931	0.89583	0.130931	0.89583	15	14	0.914475		249	186	81	1.04745	0.294895	1.04745	0.294895	15	14	0.310143		265	170	65
1815.02	5509.59	0.225033	240	195	90	0.654654	0.512691	0.654654	0.512691	15	14	0.532545		227	179	74	1.10274	0.270139	1.10274	0.270139	14	14	0.285176		229	206	101	0.174574	0.861414	0.174574	0.861414	15	14	0.880478		251	184	79	1.13473	0.256488	1.13473	0.256488	15	14	0.270299		265	170	65
1816.94	5503.74	0.225272	240	195	90	0.654654	0.512691	0.654654	0.512691	15	14	0.532545		226	180	75	1.0568	0.290605	1.0568	0.290605	14	14	0.306426		229	206	101	0.174574	0.861414	0.174574	0.861414	15	14	0.880478		249	186	81	1.04745	0.294895	1.04745	0.294895	15	14	0.310143		265	170	65
1818.87	5497.91	0.225512	240	195	90	0.654654	0.512691	0.654654	0.512691	15	14	0.532545		226	180	75	1.0568	0.290605	1.0568	0.290605	14	14	0.306426		229	206	101	0.174574	0.861414	0.174574	0.861414	15	14	0.880478		249	186	81	1.04745	0.294895	1.04745	0.294895	15	14	0.310143		265	170	65
1820.8	5492.08	0.225751	240	195	90	0.654654	0.512691	0.654654	0.512691	15	14	0.532545		226	180	75	1.0568	0.290605	1.0568	0.290605	14	14	0.306426		229	206	101	0.174574	0.861414	0.174574	0.861414	15	14	0.880478		248	187	82	1.0038	0.315475	1.0038	0.315475	15	14	0.331405		265	170	65
1822.73	5486.27	0.22599	240	195	90	0.654654	0.512691	0.654654	0.512691	15	14	0.532545		227	179	74	1.10274	0.270139	1.10274	0.270139	14	14	0.285176		229	206	101	0.174574	0.861414	0.174574	0.861414	15	14	0.880478		251	184	79	1.13473	0.256488	1.13473	0.256488	15	14	0.270299		266	169	64
1824.66	5480.47	0.226229	240	195	90	0.654654	0.512691	0.654654	0.512691	15	14	0.532545		227	179	74	1.10274	0.270139	1.10274	0.270139	14	14	0.285176		228	207	102	0.130931	0.89583	0.130931	0.89583	15	14	0.914475		248	187	82	1.0038	0.315475	1.0038	0.315475	15	14	0.331405		266	169	64
1826.59	5474.69	0.226468	240	195	90	0.654654	0.512691	0.654654	0.512691	15	14	0.532545		227	179	74	1.10274	0.270139	1.10274	0.270139	14	14	0.285176		229	206	101	0.174574	0.861414	0.174574	0.861414	15	14	0.880478		248	187	82	1.0038	0.315475	1.0038	0.315475	15	14	0.331405		266	169	64
1828.52	5468.91	0.226707	240	195	90	0.654654	0.512691	0.654654	0.512691	15	14	0.532545		227	179	74	1.10274	0.270139	1.10274	0.270139	14	14	0.285176		229	206	101	0.174574	0.861414	0.174574	0.861414	15	14	0.880478		248	187	82	1.0038	0.315475	1.0038	0.315475	15	14	0.331405		266	169	64
1830.45	5463.15	0.226946	240	195	90	0.654654	0.512691	0.654654	0.512691	15	14	0.532545		227	179	74	1.10274	0.270139	1.10274	0.270139	14	14	0.285176		228	207	102	0.130931	0.89583	0.130931	0.89583	15	14	0.914475		248	187	82	1.0038	0.315475	1.0038	0.315475	15	14	0.331405		266	169	64
1832.38	5457.4	0.227186	240	195	90	0.654654	0.512691	0.654654	0.512691	15	14	0.532545		227	179	74	1.10274	0.270139	1.10274	0.270139	14	14	0.285176		228	207	102	0.130931	0.89583	0.130931	0.89583	15	14	0.914475		246	189	84	0.916515	0.359397	0.916515	0.359397	15	14	0.376588		267	168	63
1834.3	5451.66	0.227425	240	195	90	0.654654	0.512691	0.654654	0.512691	15	14	0.532545		227	179	74	1.10274	0.270139	1.10274	0.270139	14	14	0.285176		229	206	101	0.174574	0.861414	0.174574	0.861414	15	14	0.880478		246	189	84	0.916515	0.359397	0.916515	0.359397	15	14	0.376588		267	168	63
1836.23	5445.93	0.227664	240	195	90	0.654654	0.512691	0.654654	0.512691	15	14	0.532545		227	179	74	1.10274	0.270139	1.10274	0.270139	14	14	0.285176		228	207	102	0.130931	0.89583	0.130931	0.89583	15	14	0.914475		247	188	83	0.960159	0.336976	0.960159	0.336976	15	14	0.353554		267	168	63
1838.16	5440.22	0.227903	240	195	90	0.654654	0.512691	0.654654	0.512691	15	14	0.532545		226	180	75	1.0568	0.290605	1.0568	0.290605	14	14	0.306426		228	207	102	0.130931	0.89583	0.130931	0.89583	15	14	0.914475		247	188	83	0.960159	0.336976	0.960159	0.336976	15	14	0.353554		267	168	63
1840.09	5434.52	0.228142	240	195	90	0.654654	0.512691	0.654654	0.512691	15	14	0.532545		226	180	75	1.0568	0.290605	1.0568	0.290605	14	14	0.306426		229	206	101	0.174574	0.861414	0.174574	0.861414	15	14	0.880478		246	189	84	0.916515	0.359397	0.916515	0.359397	15	14	0.376588		267	168	63
1842.02	5428.82	0.228381	240	195	90	0.654654	0.512691	0.654654	0.512691	15	14	0.532545		227	179	74	1.10274	0.270139	1.10274	0.270139	14	14	0.285176		229	206	101	0.174574	0.861414	0.174574	0.861414	15	14	0.880478		249	186	81	1.04745	0.294895	1.04745	0.294895	15	14	0.310143		267	168	63
1843.95	5423.15	0.22862	239	196	91	0.61101	0.541193	0.61101	0.541193	15	14	0.561291		227	179	74	1.10274	0.270139	1.10274	0.270139	14	14	0.285176		229	206	101	0.174574	0.861414	0.174574	0.861414	15	14	0.880478		248	187	82	1.0038	0.315475	1.0038	0.315475	15	14	0.331405		268	167	62
1845.88	5417.48	0.22886	240	195	90	0.654654	0.512691	0.654654	0.512691	15	14	0.532545		227	179	74	1.10274	0.270139	1.10274	0.270139	14	14	0.285176		229	206	101	0.174574	0.861414	0.174574	0.861414	15	14	0.880478		248	187	82	1.0038	0.315475	1.0038	0.315475	15	14	0.331405		267	168	63
1847.81	5411.82	0.229099	240	195	90	0.654654	0.512691	0.654654	0.512691	15	14	0.532545		227	179	74	1.10274	0.270139	1.10274	0.270139	14	14	0.285176		229	206	101	0.174574	0.861414	0.174574	0.861414	15	14	0.880478		248	187	82	1.0038	0.315475	1.0038	0.315475	15	14	0.331405		267	168	63
1849.73	5406.18	0.229338	240	195	90	0.654654	0.512691	0.654654	0.512691	15	14	0.532545		227	179	74	1.10274	0.270139	1.10274	0.270139	14	14	0.285176		229	206	101	0.174574	0.861414	0.174574	0.861414	15	14	0.880478		249	186	81	1.04745	0.294895	1.04745	0.294895	15	14	0.310143		267	168	63
1851.66	5400.55	0.229577	240	195	90	0.654654	0.512691	0.654654	0.512691	15	14	0.532545		227	179	74	1.10274	0.270139	1.10274	0.270139	14	14	0.285176		230	205	100	0.218218	0.827259	0.218218	0.827259	15	14	0.846694		250	185	80	1.09109	0.275234	1.09109	0.275234	15	14	0.289776		267	168	63
1853.59	5394.93	0.229816	239	196	91	0.61101	0.541193	0.61101	0.541193	15	14	0.561291		227	179	74	1.10274	0.270139	1.10274	0.270139	14	14	0.285176		229	206	101	0.174574	0.861414	0.174574	0.861414	15	14	0.880478		250	185	80	1.09109	0.275234	1.09109	0.275234	15	14	0.289776		267	168	63
1855.52	5389.32	0.230055	239	196	91	0.61101	0.541193	0.61101	0.541193	15	14	0.561291		226	180	75	1.0568	0.290605	1.0568	0.290605	14	14	0.306426		229	206	101	0.174574	0.861414	0.174574	0.861414	15	14	0.880478		250	185	80	1.09109	0.275234	1.09109	0.275234	15	14	0.289776		267	168	63
1857.45	5383.73	0.230294	239	196	91	0.61101	0.541193	0.61101	0.541193	15	14	0.561291		227	179	74	1.10274	0.270139	1.10274	0.270139	14	14	0.285176		229	206	101	0.174574	0.861414	0.174574	0.861414	15	14	0.880478		250	185	80	1.09109	0.275234	1.09109	0.275234	15	14	0.289776		267	168	63
1859.38	5378.14	0.230534	239	196	91	0.61101	0.541193	0.61101	0.541193	15	14	0.561291		228	178	73	1.14869	0.250684	1.14869	0.250684	14	14	0.26491		229	206	101	0.174574	0.861414	0.174574	0.861414	15	14	0.880478		250	185	80	1.09109	0.275234	1.09109	0.275234	15	14	0.289776		267	168	63
1861.31	5372.57	0.230773	239	196	91	0.61101	0.541193	0.61101	0.541193	15	14	0.561291		228	178	73	1.14869	0.250684	1.14869	0.250684	14	14	0.26491		229	206	101	0.174574	0.861414	0.174574	0.861414	15	14	0.880478		250	185	80	1.09109	0.275234	1.09109	0.275234	15	14	0.289776		268	167	62
1863.24	5367.01	0.231012	238	197	92	0.567367	0.570466	0.567367	0.570466	15	14	0.590745		228	178	73	1.14869	0.250684	1.14869	0.250684	14	14	0.26491		229	206	101	0.174574	0.861414	0.174574	0.861414	15	14	0.880478		251	184	79	1.13473	0.256488	1.13473	0.256488	15	14	0.270299		268	167	62
1865.17	5361.46	0.231251	238	197	92	0.567367	0.570466	0.567367	0.570466	15	14	0.590745		228	178	73	1.14869	0.250684	1.14869	0.250684	14	14	0.26491		229	206	101	0.174574	0.861414	0.174574	0.861414	15	14	0.880478		251	184	79	1.13473	0.256488	1.13473	0.256488	15	14	0.270299		268	167	62
1867.09	5355.92	0.23149	238	197	92	0.567367	0.570466	0.567367	0.570466	15	14	0.590745		228	178	73	1.14869	0.250684	1.14869	0.250684	14	14	0.26491		229	206	101	0.174574	0.861414	0.174574	0.861414	15	14	0.880478		252	183	78	1.17838	0.238647	1.17838	0.238647	15	14	0.251712		268	167	62
1869.02	5350.39	0.231729	238	197	92	0.567367	0.570466	0.567367	0.570466	15	14	0.590745		227	179	74	1.10274	0.270139	1.10274	0.270139	14	14	0.285176		229	206	101	0.174574	0.861414	0.174574	0.861414	15	14	0.880478		250	185	80	1.09109	0.275234	1.09109	0.275234	15	14	0.289776		268	167	62
1870.95	5344.87	0.231968	238	197	92	0.567367	0.570466	0.567367	0.570466	15	14	0.590745		228	178	73	1.14869	0.250684	1.14869	0.250684	14	14	0.26491		229	206	101	0.174574	0.861414	0.174574	0.861414	15	14	0.880478		251	184	79	1.13473	0.256488	1.13473	0.256488	15	14	0.270299		266	169	64
1872.88	5339.37	0.232208	238	197	92	0.567367	0.570466	0.567367	0.570466	15	14	0.590745		227	179	74	1.10274	0.270139	1.10274	0.270139	14	14	0.285176		229	206	101	0.174574	0.861414	0.174574	0.861414	15	14	0.880478		251	184	79	1.13473	0.256488	1.13473	0.256488	15	14	0.270299		266	169	64
1874.81	5333.88	0.232447	238	197	92	0.567367	0.570466	0.567367	0.570466	15	14	0.590745		227	179	74	1.10274	0.270139	1.10274	0.270139	14	14	0.285176		229	206	101	0.174574	0.861414	0.174574	0.861414	15	14	0.880478		251	184	79	1.13473	0.256488	1.13473	0.256488	15	14	0.270299		266	169	64
1876.74	5328.39	0.232686	238	197	92	0.567367	0.570466	0.567367	0.570466	15	14	0.590745		228	178	73	1.14869	0.250684	1.14869	0.250684	14	14	0.26491		229	206	101	0.174574	0.861414	0.174574	0.861414	15	14	0.880478		251	184	79	1.13473	0.256488	1.13473	0.256488	15	14	0.270299		266	169	64
1878.67	5322.92	0.232925	238	197	92	0.567367	0.570466	0.567367	0.570466	15	14	0.590745		229	177	72	1.19464	0.232229	1.19464	0.232229	14	14	0.24563		229	206	101	0.174574	0.861414	0.174574	0.861414	15	14	0.880478		251	184	79	1.13473	0.256488	1.13473	0.256488	15	14	0.270299		266	169	64
1880.6	5317.46	0.233164	238	197	92	0.567367	0.570466	0.567367	0.570466	15	14	0.590745		229	177	72	1.19464	0.232229	1.19464	0.232229	14	14	0.24563		229	206	101	0.174574	0.861414	0.174574	0.861414	15	14	0.880478		251	184	79	1.13473	0.256488	1.13473	0.256488	15	14	0.270299		266	169	64
1882.52	5312.02	0.233403	238	197	92	0.567367	0.570466	0.567367	0.570466	15	14	0.590745		228	178	73	1.14869	0.250684	1.14869	0.250684	14	14	0.26491		229	206	101	0.174574	0.861414	0.174574	0.861414	15	14	0.880478		251	184	79	1.13473	0.256488	1.13473	0.256488	15	14	0.270299		266	169	64
1884.45	5306.58	0.233642	238	197	92	0.567367	0.570466	0.567367	0.570466	15	14	0.590745		228	178	73	1.14869	0.250684	1.14869	0.250684	14	14	0.26491		229	206	101	0.174574	0.861414	0.174574	0.861414	15	14	0.880478		251	184	79	1.13473	0.256488	1.13473	0.256488	15	14	0.270299		266	169	64
1886.38	5301.15	0.233882	238	197	92	0.567367	0.570466	0.567367	0.570466	15	14	0.590745		228	178	73	1.14869	0.250684	1.14869	0.250684	14	14	0.26491		229	206	101	0.174574	0.861414	0.174574	0.861414	15	14	0.880478		251	184	79	1.13473	0.256488	1.13473	0.256488	15	14	0.270299		267	168	63
1888.31	5295.74	0.234121	238	197	92	0.567367	0.570466	0.567367	0.570466	15	14	0.590745		228	178	73	1.14869	0.250684	1.14869	0.250684	14	14	0.26491		229	206	101	0.174574	0.861414	0.174574	0.861414	15	14	0.880478		251	184	79	1.13473	0.256488	1.13473	0.256488	15	14	0.270299		267	168	63
1890.24	5290.33	0.23436	238	197	92	0.567367	0.570466	0.567367	0.570466	15	14	0.590745		227	179	74	1.10274	0.270139	1.10274	0.270139	14	14	0.285176		229	206	101	0.174574	0.861414	0.174574	0.861414	15	14	0.880478		251	184	79	1.13473	0.256488	1.13473	0.256488	15	14	0.270299		267	168	63
1892.17	5284.94	0.234599	238	197	92	0.567367	0.570466	0.567367	0.570466	15	14	0.590745		228	178	73	1.14869	0.250684	1.14869	0.250684	14	14	0.26491		229	206	101	0.174574	0.861414	0.174574	0.861414	15	14	0.880478		251	184	79	1.13473	0.256488	1.13473	0.256488	15	14	0.270299		267	168	63
1894.1	5279.56	0.234838	238	197	92	0.567367	0.570466	0.567367	0.570466	15	14	0.590745		228	178	73	1.14869	0.250684	1.14869	0.250684	14	14	0.26491		229	206	101	0.174574	0.861414	0.174574	0.861414	15	14	0.880478		251	184	79	1.13473	0.256488	1.13473	0.256488	15	14	0.270299		267	168	63
1896.03	5274.19	0.235077	238	197	92	0.567367	0.570466	0.567367	0.570466	15	14	0.590745		228	178	73	1.14869	0.250684	1.14869	0.250684	14	14	0.26491		229	206	101	0.174574	0.861414	0.174574	0.861414	15	14	0.880478		251	184	79	1.13473	0.256488	1.13473	0.256488	15	14	0.270299		267	168	63
1897.95	5268.83	0.235316	238	197	92	0.567367	0.570466	0.567367	0.570466	15	14	0.590745		227	179	74	1.10274	0.270139	1.10274	0.270139	14	14	0.285176		229	206	101	0.174574	0.861414	0.174574	0.861414	15	14	0.880478		251	184	79	1.13473	0.256488	1.13473	0.256488	15	14	0.270299		267	168	63
1899.88	5263.48	0.235556	238	197	92	0.567367	0.570466	0.567367	0.570466	15	14	0.590745		228	178	73	1.14869	0.250684	1.14869	0.250684	14	14	0.26491		229	206	101	0.174574	0.861414	0.174574	0.861414	15	14	0.880478		251	184	79	1.13473	0.256488	1.13473	0.256488	15	14	0.270299		267	168	63
1901.81	5258.14	0.235795	238	197	92	0.567367	0.570466	0.567367	0.570466	15	14	0.590745		228	178	73	1.14869	0.250684	1.14869	0.250684	14	14	0.26491		229	206	101	0.174574	0.861414	0.174574	0.861414	15	14	0.880478		251	184	79	1.13473	0.256488	1.13473	0.256488	15	14	0.270299		267	168	63
1903.74	5252.81	0.236034	238	197	92	0.567367	0.570466	0.567367	0.570466	15	14	0.590745		227	179	74	1.10274	0.270139	1.10274	0.270139	14	14	0.285176		229	206	101	0.174574	0.861414	0.174574	0.861414	15	14	0.880478		251	184	79	1.13473	0.256488	1.13473	0.256488	15	14	0.270299		267	168	63
1905.67	5247.5	0.236273	238	197	92	0.567367	0.570466	0.567367	0.570466	15	14	0.590745		228	178	73	1.14869	0.250684	1.14869	0.250684	14	14	0.26491		229	206	101	0.174574	0.861414	0.174574	0.861414	15	14	0.880478		251	184	79	1.13473	0.256488	1.13473	0.256488	15	14	0.270299		267	168	63
1907.6	5242.19	0.236512	238	197	92	0.567367	0.570466	0.567367	0.570466	15	14	0.590745		228	178	73	1.14869	0.250684	1.14869	0.250684	14	14	0.26491		229	206	101	0.174574	0.861414	0.174574	0.861414	15	14	0.880478		251	184	79	1.13473	0.256488	1.13473	0.256488	15	14	0.270299		267	168	63
1909.53	5236.9	0.236751	238	197	92	0.567367	0.570466	0.567367	0.570466	15	14	0.590745		226	180	75	1.0568	0.290605	1.0568	0.290605	14	14	0.306426		229	206	101	0.174574	0.861414	0.174574	0.861414	15	14	0.880478		251	184	79	1.13473	0.256488	1.13473	0.256488	15	14	0.270299		267	168	63
1911.46	5231.61	0.23699	238	197	92	0.567367	0.570466	0.567367	0.570466	15	14	0.590745		225	181	76	1.01085	0.312089	1.01085	0.312089	14	14	0.328667		229	206	101	0.174574	0.861414	0.174574	0.861414	15	14	0.880478		250	185	80	1.09109	0.275234	1.09109	0.275234	15	14	0.289776		267	168	63
1913.39	5226.34	0.23723	238	197	92	0.567367	0.570466	0.567367	0.570466	15	14	0.590745		226	180	75	1.0568	0.290605	1.0568	0.290605	14	14	0.306426		229	206	101	0.174574	0.861414	0.174574	0.861414	15	14	0.880478		250	185	80	1.09109	0.275234	1.09109	0.275234	15	14	0.289776		267	168	63
1915.31	5221.08	0.237469	238	197	92	0.567367	0.570466	0.567367	0.570466	15	14	0.590745		226	180	75	1.0568	0.290605	1.0568	0.290605	14	14	0.306426		229	206	101	0.174574	0.861414	0.174574	0.861414	15	14	0.880478		252	183	78	1.17838	0.238647	1.17838	0.238647	15	14	0.251712		267	168	63
1917.24	5215.82	0.237708	238	197	92	0.567367	0.570466	0.567367	0.570466	15	14	0.590745		226	180	75	1.0568	0.290605	1.0568	0.290605	14	14	0.306426		229	206	101	0.174574	0.861414	0.174574	0.861414	15	14	0.880478		249	186	81	1.04745	0.294895	1.04745	0.294895	15	14	0.310143		267	168	63
1919.17	5210.58	0.237947	238	197	92	0.567367	0.570466	0.567367	0.570466	15	14	0.590745		226	180	75	1.0568	0.290605	1.0568	0.290605	14	14	0.306426		229	206	101	0.174574	0.861414	0.174574	0.861414	15	14	0.880478		249	186	81	1.04745	0.294895	1.04745	0.294895	15	14	0.310143		267	168	63
1921.1	5205.35	0.238186	238	197	92	0.567367	0.570466	0.567367	0.570466	15	14	0.590745		226	180	75	1.0568	0.290605	1.0568	0.290605	14	14	0.306426		229	206	101	0.174574	0.861414	0.174574	0.861414	15	14	0.880478		250	185	80	1.09109	0.275234	1.09109	0.275234	15	14	0.289776		267	168	63
1923.03	5200.13	0.238425	238	197	92	0.567367	0.570466	0.567367	0.570466	15	14	0.590745		226	180	75	1.0568	0.290605	1.0568	0.290605	14	14	0.306426		229	206	101	0.174574	0.861414	0.174574	0.861414	15	14	0.880478		249	186	81	1.04745	0.294895	1.04745	0.294895	15	14	0.310143		267	168	63
1924.96	5194.92	0.238664	238	197	92	0.567367	0.570466	0.567367	0.570466	15	14	0.590745		225	181	76	1.01085	0.312089	1.01085	0.312089	14	14	0.328667		228	207	102	0.130931	0.89583	0.130931	0.89583	15	14	0.914475		252	183	78	1.17838	0.238647	1.17838	0.238647	15	14	0.251712		267	168	63
1926.89	5189.72	0.238904	238	197	92	0.567367	0.570466	0.567367	0.570466	15	14	0.590745		225	181	76	1.01085	0.312089	1.01085	0.312089	14	14	0.328667		228	207	102	0.130931	0.89583	0.130931	0.89583	15	14	0.914475		251	184	79	1.13473	0.256488	1.13473	0.256488	15	14	0.270299		267	168	63
1928.82	5184.53	0.239143	238	197	92	0.567367	0.570466	0.567367	0.570466	15	14	0.590745		225	181	76	1.01085	0.312089	1.01085	0.312089	14	14	0.328667		229	206	101	0.174574	0.861414	0.174574	0.861414	15	14	0.880478		252	183	78	1.17838	0.238647	1.17838	0.238647	15	14	0.251712		268	167	62
1930.74	5179.35	0.239382	238	197	92	0.567367	0.570466	0.567367	0.570466	15	14	0.590745		225	181	76	1.01085	0.312089	1.01085	0.312089	14	14	0.328667		229	206	101	0.174574	0.861414	0.174574	0.861414	15	14	0.880478		253	182	77	1.22202	0.221701	1.22202	0.221701	15	14	0.234007		269	166	61
1932.67	5174.18	0.239621	238	197	92	0.567367	0.570466	0.567367	0.570466	15	14	0.590745		225	181	76	1.01085	0.312089	1.01085	0.312089	14	14	0.328667		229	206	101	0.174574	0.861414	0.174574	0.861414	15	14	0.880478		253	182	77	1.22202	0.221701	1.22202	0.221701	15	14	0.234007		269	166	61
1934.6	5169.02	0.23986	238	197	92	0.567367	0.570466	0.567367	0.570466	15	14	0.590745		226	180	75	1.0568	0.290605	1.0568	0.290605	14	14	0.306426		229	206	101	0.174574	0.861414	0.174574	0.861414	15	14	0.880478		252	183	78	1.17838	0.238647	1.17838	0.238647	15	14	0.251712		269	166	61
1936.53	5163.87	0.240099	240	195	90	0.654654	0.512691	0.654654	0.512691	15	14	0.532545		226	180	75	1.0568	0.290605	1.0568	0.290605	14	14	0.306426		229	206	101	0.174574	0.861414	0.174574	0.861414	15	14	0.880478		252	183	78	1.17838	0.238647	1.17838	0.238647	15	14	0.251712		269	166	61
1938.46	5158.73	0.240338	240	195	90	0.654654	0.512691	0.654654	0.512691	15	14	0.532545		226	180	75	1.0568	0.290605	1.0568	0.290605	14	14	0.306426		229	206	101	0.174574	0.861414	0.174574	0.861414	15	14	0.880478		253	182	77	1.22202	0.221701	1.22202	0.221701	15	14	0.234007		269	166	61
1940.39	5153.61	0.240578	240	195	90	0.654654	0.512691	0.654654	0.512691	15	14	0.532545		227	179	74	1.10274	0.270139	1.10274	0.270139	14	14	0.285176		231	204	99	0.261861	0.793428	0.261861	0.793428	15	14	0.813179		253	182	77	1.22202	0.221701	1.22202	0.221701	15	14	0.234007		269	166	61
1942.32	5148.49	0.240817	240	195	90	0.654654	0.512691	0.654654	0.512691	15	14	0.532545		227	179	74	1.10274	0.270139	1.10274	0.270139	14	14	0.285176		230	205	100	0.218218	0.827259	0.218218	0.827259	15	14	0.846694		253	182	77	1.22202	0.221701	1.22202	0.221701	15	14	0.234007		269	166	61
1944.25	5143.38	0.241056	239	196	91	0.61101	0.541193	0.61101	0.541193	15	14	0.561291		227	179	74	1.10274	0.270139	1.10274	0.270139	14	14	0.285176		230	205	100	0.218218	0.827259	0.218218	0.827259	15	14	0.846694		253	182	77	1.22202	0.221701	1.22202	0.221701	15	14	0.234007		269	166	61
1946.18	5138.28	0.241295	240	195	90	0.654654	0.512691	0.654654	0.512691	15	14	0.532545		226	180	75	1.0568	0.290605	1.0568	0.290605	14	14	0.306426		230	205	100	0.218218	0.827259	0.218218	0.827259	15	14	0.846694		253	182	77	1.22202	0.221701	1.22202	0.221701	15	14	0.234007		269	166	61
1948.1	5133.2	0.241534	240	195	90	0.654654	0.512691	0.654654	0.512691	15	14	0.532545		226	180	75	1.0568	0.290605	1.0568	0.290605	14	14	0.306426		230	205	100	0.218218	0.827259	0.218218	0.827259	15	14	0.846694		254	181	76	1.26566	0.205634	1.26566	0.205634	15	14	0.217176		269	166	61
1950.03	5128.12	0.241773	240	195	90	0.654654	0.512691	0.654654	0.512691	15	14	0.532545		226	180	75	1.0568	0.290605	1.0568	0.290605	14	14	0.306426		230	205	100	0.218218	0.827259	0.218218	0.827259	15	14	0.846694		255	180	75	1.30931	0.190431	1.30931	0.190431	15	14	0.201205		269	166	61
1951.96	5123.05	0.242012	240	195	90	0.654654	0.512691	0.654654	0.512691	15	14	0.532545		226	180	75	1.0568	0.290605	1.0568	0.290605	14	14	0.306426		230	205	100	0.218218	0.827259	0.218218	0.827259	15	14	0.846694		255	180	75	1.30931	0.190431	1.30931	0.190431	15	14	0.201205		269	166	61
1953.89	5117.99	0.242252	240	195	90	0.654654	0.512691	0.654654	0.512691	15	14	0.532545		226	180	75	1.0568	0.290605	1.0568	0.290605	14	14	0.306426		230	205	100	0.218218	0.827259	0.218218	0.827259	15	14	0.846694		255	180	75	1.30931	0.190431	1.30931	0.190431	15	14	0.201205		269	166	61
1955.82	5112.95	0.242491	240	195	90	0.654654	0.512691	0.654654	0.512691	15	14	0.532545		226	180	75	1.0568	0.290605	1.0568	0.290605	14	14	0.306426		230	205	100	0.218218	0.827259	0.218218	0.827259	15	14	0.846694		255	180	75	1.30931	0.190431	1.30931	0.190431	15	14	0.201205		269	166	61
1957.75	5107.91	0.24273	240	195	90	0.654654	0.512691	0.654654	0.512691	15	14	0.532545		227	179	74	1.10274	0.270139	1.10274	0.270139	14	14	0.285176		230	205	100	0.218218	0.827259	0.218218	0.827259	15	14	0.846694		255	180	75	1.30931	0.190431	1.30931	0.190431	15	14	0.201205		269	166	61
1959.68	5102.88	0.242969	240	195	90	0.654654	0.512691	0.654654	0.512691	15	14	0.532545		226	180	75	1.0568	0.290605	1.0568	0.290605	14	14	0.306426		230	205	100	0.218218	0.827259	0.218218	0.827259	15	14	0.846694		255	180	75	1.30931	0.190431	1.30931	0.190431	15	14	0.201205		269	166	61
1961.61	5097.86	0.243208	240	195	90	0.654654	0.512691	0.654654	0.512691	15	14	0.532545		226	180	75	1.0568	0.290605	1.0568	0.290605	14	14	0.306426		230	205	100	0.218218	0.827259	0.218218	0.827259	15	14	0.846694		255	180	75	1.30931	0.190431	1.30931	0.190431	15	14	0.201205		269	166	61
1963.53	5092.86	0.243447	240	195	90	0.654654	0.512691	0.654654	0.512691	15	14	0.532545		226	180	75	1.0568	0.290605	1.0568	0.290605	14	14	0.306426		230	205	100	0.218218	0.827259	0.218218	0.827259	15	14	0.846694		255	180	75	1.30931	0.190431	1.30931	0.190431	15	14	0.201205		269	166	61
1965.46	5087.86	0.243686	240	195	90	0.654654	0.512691	0.654654	0.512691	15	14	0.532545		226	180	75	1.0568	0.290605	1.0568	0.290605	14	14	0.306426		231	204	99	0.261861	0.793428	0.261861	0.793428	15	14	0.813179		255	180	75	1.30931	0.190431	1.30931	0.190431	15	14	0.201205		269	166	61
1967.39	5082.87	0.243926	240	195	90	0.654654	0.512691	0.654654	0.512691	15	14	0.532545		226	180	75	1.0568	0.290605	1.0568	0.290605	14	14	0.306426		230	205	100	0.218218	0.827259	0.218218	0.827259	15	14	0.846694		256	179	74	1.35295	0.176072	1.35295	0.176072	15	14	0.186083		269	166	61
1969.32	5077.89	0.244165	240	195	90	0.654654	0.512691	0.654654	0.512691	15	14	0.532545		227	179	74	1.10274	0.270139	1.10274	0.270139	14	14	0.285176		230	205	100	0.218218	0.827259	0.218218	0.827259	15	14	0.846694		257	178	73	1.39659	0.162537	1.39659	0.162537	15	14	0.171789		269	166	61
1971.25	5072.92	0.244404	240	195	90	0.654654	0.512691	0.654654	0.512691	15	14	0.532545		227	179	74	1.10274	0.270139	1.10274	0.270139	14	14	0.285176		230	205	100	0.218218	0.827259	0.218218	0.827259	15	14	0.846694		257	178	73	1.39659	0.162537	1.39659	0.162537	15	14	0.171789		269	166	61
1973.18	5067.96	0.244643	240	195	90	0.654654	0.512691	0.654654	0.512691	15	14	0.532545		227	179	74	1.10274	0.270139	1.10274	0.270139	14	14	0.285176		230	205	100	0.218218	0.827259	0.218218	0.827259	15	14	0.846694		256	179	74	1.35295	0.176072	1.35295	0.176072	15	14	0.186083		269	166	61
1975.11	5063.02	0.244882	240	195	90	0.654654	0.512691	0.654654	0.512691	15	14	0.532545		227	179	74	1.10274	0.270139	1.10274	0.270139	14	14	0.285176		230	205	100	0.218218	0.827259	0.218218	0.827259	15	14	0.846694		256	179	74	1.35295	0.176072	1.35295	0.176072	15	14	0.186083		269	166	61
1977.04	5058.08	0.245121	240	195	90	0.654654	0.512691	0.654654	0.512691	15	14	0.532545		226	180	75	1.0568	0.290605	1.0568	0.290605	14	14	0.306426		231	204	99	0.261861	0.793428	0.261861	0.793428	15	14	0.813179		256	179	74	1.35295	0.176072	1.35295	0.176072	15	14	0.186083		269	166	61
1978.97	5053.15	0.24536	240	195	90	0.654654	0.512691	0.654654	0.512691	15	14	0.532545		227	179	74	1.10274	0.270139	1.10274	0.270139	14	14	0.285176		231	204	99	0.261861	0.793428	0.261861	0.793428	15	14	0.813179		256	179	74	1.35295	0.176072	1.35295	0.176072	15	14	0.186083		269	166	61
1980.89	5048.23	0.2456	240	195	90	0.654654	0.512691	0.654654	0.512691	15	14	0.532545		227	179	74	1.10274	0.270139	1.10274	0.270139	14	14	0.285176		231	204	99	0.261861	0.793428	0.261861	0.793428	15	14	0.813179		256	179	74	1.35295	0.176072	1.35295	0.176072	15	14	0.186083		269	166	61
1982.82	5043.31	0.245839	240	195	90	0.654654	0.512691	0.654654	0.512691	15	14	0.532545		228	178	73	1.14869	0.250684	1.14869	0.250684	14	14	0.26491		231	204	99	0.261861	0.793428	0.261861	0.793428	15	14	0.813179		256	179	74	1.35295	0.176072	1.35295	0.176072	15	14	0.186083		269	166	61
1984.75	5038.41	0.246078	240	195	90	0.654654	0.512691	0.654654	0.512691	15	14	0.532545		228	178	73	1.14869	0.250684	1.14869	0.250684	14	14	0.26491		231	204	99	0.261861	0.793428	0.261861	0.793428	15	14	0.813179		257	178	73	1.39659	0.162537	1.39659	0.162537	15	14	0.171789		269	166	61
1986.68	5033.52	0.246317	240	195	90	0.654654	0.512691	0.654654	0.512691	15	14	0.532545		229	177	72	1.19464	0.232229	1.19464	0.232229	14	14	0.24563		231	204	99	0.261861	0.793428	0.261861	0.793428	15	14	0.813179		257	178	73	1.39659	0.162537	1.39659	0.162537	15	14	0.171789		269	166	61
1988.61	5028.64	0.246556	240	195	90	0.654654	0.512691	0.654654	0.512691	15	14	0.532545		228	178	73	1.14869	0.250684	1.14869	0.250684	14	14	0.26491		232	203	98	0.305505	0.759982	0.305505	0.759982	15	14	0.779995		257	178	73	1.39659	0.162537	1.39659	0.162537	15	14	0.171789		269	166	61
1990.54	5023.77	0.246795	240	195	90	0.654654	0.512691	0.654654	0.512691	15	14	0.532545		228	178	73	1.14869	0.250684	1.14869	0.250684	14	14	0.26491		232	203	98	0.305505	0.759982	0.305505	0.759982	15	14	0.779995		257	178	73	1.39659	0.162537	1.39659	0.162537	15	14	0.171789		269	166	61
1992.47	5018.9	0.247034	240	195	90	0.654654	0.512691	0.654654	0.512691	15	14	0.532545		228	178	73	1.14869	0.250684	1.14869	0.250684	14	14	0.26491		231	204	99	0.261861	0.793428	0.261861	0.793428	15	14	0.813179		257	178	73	1.39659	0.162537	1.39659	0.162537	15	14	0.171789		269	166	61
1994.4	5014.05	0.247274	240	195	90	0.654654	0.512691	0.654654	0.512691	15	14	0.532545		228	178	73	1.14869	0.250684	1.14869	0.250684	14	14	0.26491		232	203	98	0.305505	0.759982	0.305505	0.759982	15	14	0.779995		257	178	73	1.39659	0.162537	1.39659	0.162537	15	14	0.171789		269	166	61
1996.32	5009.21	0.247513	240	195	90	0.654654	0.512691	0.654654	0.512691	15	14	0.532545		229	177	72	1.19464	0.232229	1.19464	0.232229	14	14	0.24563		232	203	98	0.305505	0.759982	0.305505	0.759982	15	14	0.779995		257	178	73	1.39659	0.162537	1.39659	0.162537	15	14	0.171789		269	166	61
1998.25	5004.37	0.247752	240	195	90	0.654654	0.512691	0.654654	0.512691	15	14	0.532545		229	177	72	1.19464	0.232229	1.19464	0.232229	14	14	0.24563		232	203	98	0.305505	0.759982	0.305505	0.759982	15	14	0.779995		257	178	73	1.39659	0.162537	1.39659	0.162537	15	14	0.171789		269	166	61
2000.18	4999.54	0.247991	240	195	90	0.654654	0.512691	0.654654	0.512691	15	14	0.532545		229	177	72	1.19464	0.232229	1.19464	0.232229	14	14	0.24563		232	203	98	0.305505	0.759982	0.305505	0.759982	15	14	0.779995		256	179	74	1.35295	0.176072	1.35295	0.176072	15	14	0.186083		269	166	61
2002.11	4994.73	0.24823	240	195	90	0.654654	0.512691	0.654654	0.512691	15	14	0.532545		228	178	73	1.14869	0.250684	1.14869	0.250684	14	14	0.26491		232	203	98	0.305505	0.759982	0.305505	0.759982	15	14	0.779995		256	179	74	1.35295	0.176072	1.35295	0.176072	15	14	0.186083		269	166	61
2004.04	4989.92	0.248469	240	195	90	0.654654	0.512691	0.654654	0.512691	15	14	0.532545		228	178	73	1.14869	0.250684	1.14869	0.250684	14	14	0.26491		232	203	98	0.305505	0.759982	0.305505	0.759982	15	14	0.779995		256	179	74	1.35295	0.176072	1.35295	0.176072	15	14	0.186083		269	166	61
2005.97	4985.12	0.248708	240	195	90	0.654654	0.512691	0.654654	0.512691	15	14	0.532545		228	178	73	1.14869	0.250684	1.14869	0.250684	14	14	0.26491		232	203	98	0.305505	0.759982	0.305505	0.759982	15	14	0.779995		256	179	74	1.35295	0.176072	1.35295	0.176072	15	14	0.186083		269	166	61
2007.9	4980.33	0.248948	240	195	90	0.654654	0.512691	0.654654	0.512691	15	14	0.532545		228	178	73	1.14869	0.250684	1.14869	0.250684	14	14	0.26491		232	203	98	0.305505	0.759982	0.305505	0.759982	15	14	0.779995		256	179	74	1.35295	0.176072	1.35295	0.176072	15	14	0.186083		269	166	61
2009.83	4975.55	0.249187	240	195	90	0.654654	0.512691	0.654654	0.512691	15	14	0.532545		227	179	74	1.10274	0.270139	1.10274	0.270139	14	14	0.285176		232	203	98	0.305505	0.759982	0.305505	0.759982	15	14	0.779995		256	179	74	1.35295	0.176072	1.35295	0.176072	15	14	0.186083		269	166	61
2011.76	4970.78	0.249426	240	195	90	0.654654	0.512691	0.654654	0.512691	15	14	0.532545		227	179	74	1.10274	0.270139	1.10274	0.270139	14	14	0.285176		232	203	98	0.305505	0.759982	0.305505	0.759982	15	14	0.779995		255	180	75	1.30931	0.190431	1.30931	0.190431	15	14	0.201205		268	167	62
2013.68	4966.02	0.249665	240	195	90	0.654654	0.512691	0.654654	0.512691	15	14	0.532545		227	179	74	1.10274	0.270139	1.10274	0.270139	14	14	0.285176		231	204	99	0.261861	0.793428	0.261861	0.793428	15	14	0.813179		256	179	74	1.35295	0.176072	1.35295	0.176072	15	14	0.186083		269	166	61
2015.61	4961.27	0.249904	240	195	90	0.654654	0.512691	0.654654	0.512691	15	14	0.532545		227	179	74	1.10274	0.270139	1.10274	0.270139	14	14	0.285176		231	204	99	0.261861	0.793428	0.261861	0.793428	15	14	0.813179		256	179	74	1.35295	0.176072	1.35295	0.176072	15	14	0.186083		269	166	61
2017.54	4956.53	0.250143	240	195	90	0.654654	0.512691	0.654654	0.512691	15	14	0.532545		226	180	75	1.0568	0.290605	1.0568	0.290605	14	14	0.306426		231	204	99	0.261861	0.793428	0.261861	0.793428	15	14	0.813179		256	179	74	1.35295	0.176072	1.35295	0.176072	15	14	0.186083		268	167	62
2019.47	4951.79	0.250382	240	195	90	0.654654	0.512691	0.654654	0.512691	15	14	0.532545		226	180	75	1.0568	0.290605	1.0568	0.290605	14	14	0.306426		231	204	99	0.261861	0.793428	0.261861	0.793428	15	14	0.813179		256	179	74	1.35295	0.176072	1.35295	0.176072	15	14	0.186083		268	167	62
2021.4	4947.07	0.250622	240	195	90	0.654654	0.512691	0.654654	0.512691	15	14	0.532545		226	180	75	1.0568	0.290605	1.0568	0.290605	14	14	0.306426		231	204	99	0.261861	0.793428	0.261861	0.793428	15	14	0.813179		256	179	74	1.35295	0.176072	1.35295	0.176072	15	14	0.186083		268	167	62
2023.33	4942.35	0.250861	239	196	91	0.61101	0.541193	0.61101	0.541193	15	14	0.561291		227	179	74	1.10274	0.270139	1.10274	0.270139	14	14	0.285176		231	204	99	0.261861	0.793428	0.261861	0.793428	15	14	0.813179		256	179	74	1.35295	0.176072	1.35295	0.176072	15	14	0.186083		268	167	62
2025.26	4937.65	0.2511	241	194	89	0.698297	0.484992	0.698297	0.484992	15	14	0.504539		227	179	74	1.10274	0.270139	1.10274	0.270139	14	14	0.285176		231	204	99	0.261861	0.793428	0.261861	0.793428	15	14	0.813179		256	179	74	1.35295	0.176072	1.35295	0.176072	15	14	0.186083		267	168	63
2027.19	4932.95	0.251339	241	194	89	0.698297	0.484992	0.698297	0.484992	15	14	0.504539		228	178	73	1.14869	0.250684	1.14869	0.250684	14	14	0.26491		231	204	99	0.261861	0.793428	0.261861	0.793428	15	14	0.813179		257	178	73	1.39659	0.162537	1.39659	0.162537	15	14	0.171789		267	168	63
2029.11	4928.26	0.251578	241	194	89	0.698297	0.484992	0.698297	0.484992	15	14	0.504539		228	178	73	1.14869	0.250684	1.14869	0.250684	14	14	0.26491		233	202	97	0.349149	0.726978	0.349149	0.726978	15	14	0.747192		257	178	73	1.39659	0.162537	1.39659	0.162537	15	14	0.171789		268	167	62
2031.04	4923.58	0.251817	240	195	90	0.654654	0.512691	0.654654	0.512691	15	14	0.532545		227	179	74	1.10274	0.270139	1.10274	0.270139	14	14	0.285176		233	202	97	0.349149	0.726978	0.349149	0.726978	15	14	0.747192		256	179	74	1.35295	0.176072	1.35295	0.176072	15	14	0.186083		268	167	62
2032.97	4918.91	0.252056	241	194	89	0.698297	0.484992	0.698297	0.484992	15	14	0.504539		228	178	73	1.14869	0.250684	1.14869	0.250684	14	14	0.26491		233	202	97	0.349149	0.726978	0.349149	0.726978	15	14	0.747192		256	179	74	1.35295	0.176072	1.35295	0.176072	15	14	0.186083		267	168	63
2034.9	4914.24	0.252296	241	194	89	0.698297	0.484992	0.698297	0.484992	15	14	0.504539		227	179	74	1.10274	0.270139	1.10274	0.270139	14	14	0.285176		233	202	97	0.349149	0.726978	0.349149	0.726978	15	14	0.747192		255	180	75	1.30931	0.190431	1.30931	0.190431	15	14	0.201205		267	168	63
2036.83	4909.59	0.252535	239	196	91	0.61101	0.541193	0.61101	0.541193	15	14	0.561291		227	179	74	1.10274	0.270139	1.10274	0.270139	14	14	0.285176		233	202	97	0.349149	0.726978	0.349149	0.726978	15	14	0.747192		254	181	76	1.26566	0.205634	1.26566	0.205634	15	14	0.217176		268	167	62
2038.76	4904.95	0.252774	239	196	91	0.61101	0.541193	0.61101	0.541193	15	14	0.561291		227	179	74	1.10274	0.270139	1.10274	0.270139	14	14	0.285176		233	202	97	0.349149	0.726978	0.349149	0.726978	15	14	0.747192		254	181	76	1.26566	0.205634	1.26566	0.205634	15	14	0.217176		268	167	62
2040.69	4900.31	0.253013	239	196	91	0.61101	0.541193	0.61101	0.541193	15	14	0.561291		228	178	73	1.14869	0.250684	1.14869	0.250684	14	14	0.26491		233	202	97	0.349149	0.726978	0.349149	0.726978	15	14	0.747192		254	181	76	1.26566	0.205634	1.26566	0.205634	15	14	0.217176		268	167	62
2042.62	4895.68	0.253252	239	196	91	0.61101	0.541193	0.61101	0.541193	15	14	0.561291		228	178	73	1.14869	0.250684	1.14869	0.250684	14	14	0.26491		233	202	97	0.349149	0.726978	0.349149	0.726978	15	14	0.747192		254	181	76	1.26566	0.205634	1.26566	0.205634	15	14	0.217176		268	167	62
2044.54	4891.06	0.253491	240	195	90	0.654654	0.512691	0.654654	0.512691	15	14	0.532545		228	178	73	1.14869	0.250684	1.14869	0.250684	14	14	0.26491		233	202	97	0.349149	0.726978	0.349149	0.726978	15	14	0.747192		254	181	76	1.26566	0.205634	1.26566	0.205634	15	14	0.217176		268	167	62
2046.47	4886.45	0.25373	239	196	91	0.61101	0.541193	0.61101	0.541193	15	14	0.561291		229	177	72	1.19464	0.232229	1.19464	0.232229	14	14	0.24563		233	202	97	0.349149	0.726978	0.349149	0.726978	15	14	0.747192		254	181	76	1.26566	0.205634	1.26566	0.205634	15	14	0.217176		268	167	62
2048.4	4881.85	0.25397	239	196	91	0.61101	0.541193	0.61101	0.541193	15	14	0.561291		229	177	72	1.19464	0.232229	1.19464	0.232229	14	14	0.24563		232	203	98	0.305505	0.759982	0.305505	0.759982	15	14	0.779995		254	181	76	1.26566	0.205634	1.26566	0.205634	15	14	0.217176		267	168	63
2050.33	4877.26	0.254209	239	196	91	0.61101	0.541193	0.61101	0.541193	15	14	0.561291		229	177	72	1.19464	0.232229	1.19464	0.232229	14	14	0.24563		232	203	98	0.305505	0.759982	0.305505	0.759982	15	14	0.779995		254	181	76	1.26566	0.205634	1.26566	0.205634	15	14	0.217176		267	168	63
2052.26	4872.68	0.254448	239	196	91	0.61101	0.541193	0.61101	0.541193	15	14	0.561291		229	177	72	1.19464	0.232229	1.19464	0.232229	14	14	0.24563		232	203	98	0.305505	0.759982	0.305505	0.759982	15	14	0.779995		253	182	77	1.22202	0.221701	1.22202	0.221701	15	14	0.234007		267	168	63
2054.19	4868.1	0.254687	239	196	91	0.61101	0.541193	0.61101	0.541193	15	14	0.561291		229	177	72	1.19464	0.232229	1.19464	0.232229	14	14	0.24563		232	203	98	0.305505	0.759982	0.305505	0.759982	15	14	0.779995		252	183	78	1.17838	0.238647	1.17838	0.238647	15	14	0.251712		267	168	63
2056.12	4863.53	0.254926	239	196	91	0.61101	0.541193	0.61101	0.541193	15	14	0.561291		229	177	72	1.19464	0.232229	1.19464	0.232229	14	14	0.24563		232	203	98	0.305505	0.759982	0.305505	0.759982	15	14	0.779995		252	183	78	1.17838	0.238647	1.17838	0.238647	15	14	0.251712		267	168	63
2058.05	4858.98	0.255165	239	196	91	0.61101	0.541193	0.61101	0.541193	15	14	0.561291		229	177	72	1.19464	0.232229	1.19464	0.232229	14	14	0.24563		232	203	98	0.305505	0.759982	0.305505	0.759982	15	14	0.779995		252	183	78	1.17838	0.238647	1.17838	0.238647	15	14	0.251712		267	168	63
2059.98	4854.43	0.255404	240	195	90	0.654654	0.512691	0.654654	0.512691	15	14	0.532545		228	178	73	1.14869	0.250684	1.14869	0.250684	14	14	0.26491		233	202	97	0.349149	0.726978	0.349149	0.726978	15	14	0.747192		252	183	78	1.17838	0.238647	1.17838	0.238647	15	14	0.251712		267	168	63
2061.9	4849.89	0.255644	240	195	90	0.654654	0.512691	0.654654	0.512691	15	14	0.532545		228	178	73	1.14869	0.250684	1.14869	0.250684	14	14	0.26491		233	202	97	0.349149	0.726978	0.349149	0.726978	15	14	0.747192		252	183	78	1.17838	0.238647	1.17838	0.238647	15	14	0.251712		267	168	63
2063.83	4845.35	0.255883	240	195	90	0.654654	0.512691	0.654654	0.512691	15	14	0.532545		229	177	72	1.19464	0.232229	1.19464	0.232229	14	14	0.24563		233	202	97	0.349149	0.726978	0.349149	0.726978	15	14	0.747192		252	183	78	1.17838	0.238647	1.17838	0.238647	15	14	0.251712		267	168	63
2065.76	4840.83	0.256122	240	195	90	0.654654	0.512691	0.654654	0.512691	15	14	0.532545		228	178	73	1.14869	0.250684	1.14869	0.250684	14	14	0.26491		233	202	97	0.349149	0.726978	0.349149	0.726978	15	14	0.747192		253	182	77	1.22202	0.221701	1.22202	0.221701	15	14	0.234007		267	168	63
2067.69	4836.31	0.256361	240	195	90	0.654654	0.512691	0.654654	0.512691	15	14	0.532545		227	179	74	1.10274	0.270139	1.10274	0.270139	14	14	0.285176		233	202	97	0.349149	0.726978	0.349149	0.726978	15	14	0.747192		253	182	77	1.22202	0.221701	1.22202	0.221701	15	14	0.234007		267	168	63
2069.62	4831.81	0.2566	240	195	90	0.654654	0.512691	0.654654	0.512691	15	14	0.532545		227	179	74	1.10274	0.270139	1.10274	0.270139	14	14	0.285176		233	202	97	0.349149	0.726978	0.349149	0.726978	15	14	0.747192		252	183	78	1.17838	0.238647	1.17838	0.238647	15	14	0.251712		267	168	63
2071.55	4827.31	0.256839	240	195	90	0.654654	0.512691	0.654654	0.512691	15	14	0.532545		228	178	73	1.14869	0.250684	1.14869	0.250684	14	14	0.26491		233	202	97	0.349149	0.726978	0.349149	0.726978	15	14	0.747192		252	183	78	1.17838	0.238647	1.17838	0.238647	15	14	0.251712		267	168	63
2073.48	4822.82	0.257078	240	195	90	0.654654	0.512691	0.654654	0.512691	15	14	0.532545		228	178	73	1.14869	0.250684	1.14869	0.250684	14	14	0.26491		233	202	97	0.349149	0.726978	0.349149	0.726978	15	14	0.747192		252	183	78	1.17838	0.238647	1.17838	0.238647	15	14	0.251712		267	168	63
2075.41	4818.33	0.257318	239	196	91	0.61101	0.541193	0.61101	0.541193	15	14	0.561291		226	180	75	1.0568	0.290605	1.0568	0.290605	14	14	0.306426		233	202	97	0.349149	0.726978	0.349149	0.726978	15	14	0.747192		252	183	78	1.17838	0.238647	1.17838	0.238647	15	14	0.251712		267	168	63
2077.33	4813.86	0.257557	240	195	90	0.654654	0.512691	0.654654	0.512691	15	14	0.532545		226	180	75	1.0568	0.290605	1.0568	0.290605	14	14	0.306426		233	202	97	0.349149	0.726978	0.349149	0.726978	15	14	0.747192		253	182	77	1.22202	0.221701	1.22202	0.221701	15	14	0.234007		267	168	63
2079.26	4809.39	0.257796	240	195	90	0.654654	0.512691	0.654654	0.512691	15	14	0.532545		226	180	75	1.0568	0.290605	1.0568	0.290605	14	14	0.306426		233	202	97	0.349149	0.726978	0.349149	0.726978	15	14	0.747192		253	182	77	1.22202	0.221701	1.22202	0.221701	15	14	0.234007		267	168	63
2081.19	4804.94	0.258035	239	196	91	0.61101	0.541193	0.61101	0.541193	15	14	0.561291		226	180	75	1.0568	0.290605	1.0568	0.290605	14	14	0.306426		233	202	97	0.349149	0.726978	0.349149	0.726978	15	14	0.747192		253	182	77	1.22202	0.221701	1.22202	0.221701	15	14	0.234007		267	168	63
2083.12	4800.49	0.258274	240	195	90	0.654654	0.512691	0.654654	0.512691	15	14	0.532545		226	180	75	1.0568	0.290605	1.0568	0.290605	14	14	0.306426		233	202	97	0.349149	0.726978	0.349149	0.726978	15	14	0.747192		253	182	77	1.22202	0.221701	1.22202	0.221701	15	14	0.234007		267	168	63
2085.05	4796.05	0.258513	240	195	90	0.654654	0.512691	0.654654	0.512691	15	14	0.532545		227	179	74	1.10274	0.270139	1.10274	0.270139	14	14	0.285176		234	201	96	0.392792	0.694473	0.392792	0.694473	15	14	0.71483		253	182	77	1.22202	0.221701	1.22202	0.221701	15	14	0.234007		267	168	63
2086.98	4791.62	0.258752	240	195	90	0.654654	0.512691	0.654654	0.512691	15	14	0.532545		226	180	75	1.0568	0.290605	1.0568	0.290605	14	14	0.306426		234	201	96	0.392792	0.694473	0.392792	0.694473	15	14	0.71483		253	182	77	1.22202	0.221701	1.22202	0.221701	15	14	0.234007		267	168	63
2088.91	4787.19	0.258992	239	196	91	0.61101	0.541193	0.61101	0.541193	15	14	0.561291		226	180	75	1.0568	0.290605	1.0568	0.290605	14	14	0.306426		234	201	96	0.392792	0.694473	0.392792	0.694473	15	14	0.71483		253	182	77	1.22202	0.221701	1.22202	0.221701	15	14	0.234007		268	167	62
2090.84	4782.77	0.259231	239	196	91	0.61101	0.541193	0.61101	0.541193	15	14	0.561291		226	180	75	1.0568	0.290605	1.0568	0.290605	14	14	0.306426		234	201	96	0.392792	0.694473	0.392792	0.694473	15	14	0.71483		253	182	77	1.22202	0.221701	1.22202	0.221701	15	14	0.234007		268	167	62
2092.77	4778.37	0.25947	240	195	90	0.654654	0.512691	0.654654	0.512691	15	14	0.532545		225	181	76	1.01085	0.312089	1.01085	0.312089	14	14	0.328667		234	201	96	0.392792	0.694473	0.392792	0.694473	15	14	0.71483		252	183	78	1.17838	0.238647	1.17838	0.238647	15	14	0.251712		268	167	62
2094.69	4773.97	0.259709	242	193	88	0.741941	0.458124	0.741941	0.458124	15	14	0.477307		225	181	76	1.01085	0.312089	1.01085	0.312089	14	14	0.328667		234	201	96	0.392792	0.694473	0.392792	0.694473	15	14	0.71483		253	182	77	1.22202	0.221701	1.22202	0.221701	15	14	0.234007		268	167	62
2096.62	4769.57	0.259948	242	193	88	0.741941	0.458124	0.741941	0.458124	15	14	0.477307		227	179	74	1.10274	0.270139	1.10274	0.270139	14	14	0.285176		236	199	94	0.480079	0.631171	0.480079	0.631171	15	14	0.651619		253	182	77	1.22202	0.221701	1.22202	0.221701	15	14	0.234007		268	167	62
2098.55	4765.19	0.260187	242	193	88	0.741941	0.458124	0.741941	0.458124	15	14	0.477307		227	179	74	1.10274	0.270139	1.10274	0.270139	14	14	0.285176		235	200	95	0.436436	0.662521	0.436436	0.662521	15	14	0.682954		253	182	77	1.22202	0.221701	1.22202	0.221701	15	14	0.234007		268	167	62
2100.48	4760.82	0.260426	242	193	88	0.741941	0.458124	0.741941	0.458124	15	14	0.477307		227	179	74	1.10274	0.270139	1.10274	0.270139	14	14	0.285176		236	199	94	0.480079	0.631171	0.480079	0.631171	15	14	0.651619		253	182	77	1.22202	0.221701	1.22202	0.221701	15	14	0.234007		268	167	62
2102.41	4756.45	0.260666	244	191	86	0.829228	0.406976	0.829228	0.406976	15	14	0.425262		228	178	73	1.14869	0.250684	1.14869	0.250684	14	14	0.26491		235	200	95	0.436436	0.662521	0.436436	0.662521	15	14	0.682954		253	182	77	1.22202	0.221701	1.22202	0.221701	15	14	0.234007		268	167	62
2104.34	4752.09	0.260905	244	191	86	0.829228	0.406976	0.829228	0.406976	15	14	0.425262		229	177	72	1.19464	0.232229	1.19464	0.232229	14	14	0.24563		234	201	96	0.392792	0.694473	0.392792	0.694473	15	14	0.71483		253	182	77	1.22202	0.221701	1.22202	0.221701	15	14	0.234007		268	167	62
2106.27	4747.74	0.261144	244	191	86	0.829228	0.406976	0.829228	0.406976	15	14	0.425262		229	177	72	1.19464	0.232229	1.19464	0.232229	14	14	0.24563		234	201	96	0.392792	0.694473	0.392792	0.694473	15	14	0.71483		254	181	76	1.26566	0.205634	1.26566	0.205634	15	14	0.217176		269	166	61
2108.2	4743.39	0.261383	244	191	86	0.829228	0.406976	0.829228	0.406976	15	14	0.425262		228	178	73	1.14869	0.250684	1.14869	0.250684	14	14	0.26491		234	201	96	0.392792	0.694473	0.392792	0.694473	15	14	0.71483		255	180	75	1.30931	0.190431	1.30931	0.190431	15	14	0.201205		270	165	60
2110.12	4739.06	0.261622	244	191	86	0.829228	0.406976	0.829228	0.406976	15	14	0.425262		230	176	71	1.24059	0.214759	1.24059	0.214759	14	14	0.227321		234	201	96	0.392792	0.694473	0.392792	0.694473	15	14	0.71483		257	178	73	1.39659	0.162537	1.39659	0.162537	15	14	0.171789		271	164	59
2112.05	4734.73	0.261861	245	190	85	0.872872	0.382734	0.872872	0.382734	15	14	0.400494		231	175	70	1.28653	0.198257	1.28653	0.198257	14	14	0.209978		235	200	95	0.436436	0.662521	0.436436	0.662521	15	14	0.682954		257	178	73	1.39659	0.162537	1.39659	0.162537	15	14	0.171789		271	164	59
2113.98	4730.41	0.2621	245	190	85	0.872872	0.382734	0.872872	0.382734	15	14	0.400494		230	176	71	1.24059	0.214759	1.24059	0.214759	14	14	0.227321		235	200	95	0.436436	0.662521	0.436436	0.662521	15	14	0.682954		258	177	72	1.44024	0.149801	1.44024	0.149801	15	14	0.158309		271	164	59
2115.91	4726.1	0.26234	245	190	85	0.872872	0.382734	0.872872	0.382734	15	14	0.400494		230	176	71	1.24059	0.214759	1.24059	0.214759	14	14	0.227321		235	200	95	0.436436	0.662521	0.436436	0.662521	15	14	0.682954		257	178	73	1.39659	0.162537	1.39659	0.162537	15	14	0.171789		271	164	59
2117.84	4721.79	0.262579	245	190	85	0.872872	0.382734	0.872872	0.382734	15	14	0.400494		231	175	70	1.28653	0.198257	1.28653	0.198257	14	14	0.209978		235	200	95	0.436436	0.662521	0.436436	0.662521	15	14	0.682954		257	178	73	1.39659	0.162537	1.39659	0.162537	15	14	0.171789		271	164	59
2119.77	4717.5	0.262818	245	190	85	0.872872	0.382734	0.872872	0.382734	15	14	0.400494		230	176	71	1.24059	0.214759	1.24059	0.214759	14	14	0.227321		236	199	94	0.480079	0.631171	0.480079	0.631171	15	14	0.651619		258	177	72	1.44024	0.149801	1.44024	0.149801	15	14	0.158309		273	162	57
2121.7	4713.21	0.263057	245	190	85	0.872872	0.382734	0.872872	0.382734	15	14	0.400494		230	176	71	1.24059	0.214759	1.24059	0.214759	14	14	0.227321		236	199	94	0.480079	0.631171	0.480079	0.631171	15	14	0.651619		259	176	71	1.48388	0.137841	1.48388	0.137841	15	14	0.145619		275	160	55
2123.63	4708.93	0.263296	245	190	85	0.872872	0.382734	0.872872	0.382734	15	14	0.400494		230	176	71	1.24059	0.214759	1.24059	0.214759	14	14	0.227321		236	199	94	0.480079	0.631171	0.480079	0.631171	15	14	0.651619		258	177	72	1.44024	0.149801	1.44024	0.149801	15	14	0.158309		274	161	56
2125.56	4704.65	0.263535	245	190	85	0.872872	0.382734	0.872872	0.382734	15	14	0.400494		228	178	73	1.14869	0.250684	1.14869	0.250684	14	14	0.26491		236	199	94	0.480079	0.631171	0.480079	0.631171	15	14	0.651619		258	177	72	1.44024	0.149801	1.44024	0.149801	15	14	0.158309		275	160	55
2127.48	4700.39	0.263774	245	190	85	0.872872	0.382734	0.872872	0.382734	15	14	0.400494		228	178	73	1.14869	0.250684	1.14869	0.250684	14	14	0.26491		236	199	94	0.480079	0.631171	0.480079	0.631171	15	14	0.651619		259	176	71	1.48388	0.137841	1.48388	0.137841	15	14	0.145619		275	160	55
2129.41	4696.13	0.264014	246	189	84	0.916515	0.359397	0.916515	0.359397	15	14	0.376588		228	178	73	1.14869	0.250684	1.14869	0.250684	14	14	0.26491		236	199	94	0.480079	0.631171	0.480079	0.631171	15	14	0.651619		259	176	71	1.48388	0.137841	1.48388	0.137841	15	14	0.145619		276	159	54
2131.34	4691.88	0.264253	246	189	84	0.916515	0.359397	0.916515	0.359397	15	14	0.376588		229	177	72	1.19464	0.232229	1.19464	0.232229	14	14	0.24563		236	199	94	0.480079	0.631171	0.480079	0.631171	15	14	0.651619		259	176	71	1.48388	0.137841	1.48388	0.137841	15	14	0.145619		276	159	54
2133.27	4687.64	0.264492	246	189	84	0.916515	0.359397	0.916515	0.359397	15	14	0.376588		230	176	71	1.24059	0.214759	1.24059	0.214759	14	14	0.227321		236	199	94	0.480079	0.631171	0.480079	0.631171	15	14	0.651619		259	176	71	1.48388	0.137841	1.48388	0.137841	15	14	0.145619		276	159	54
2135.2	4683.4	0.264731	246	189	84	0.916515	0.359397	0.916515	0.359397	15	14	0.376588		230	176	71	1.24059	0.214759	1.24059	0.214759	14	14	0.227321		236	199	94	0.480079	0.631171	0.480079	0.631171	15	14	0.651619		259	176	71	1.48388	0.137841	1.48388	0.137841	15	14	0.145619		277	158	53
2137.13	4679.18	0.26497	246	189	84	0.916515	0.359397	0.916515	0.359397	15	14	0.376588		229	177	72	1.19464	0.232229	1.19464	0.232229	14	14	0.24563		236	199	94	0.480079	0.631171	0.480079	0.631171	15	14	0.651619		259	176	71	1.48388	0.137841	1.48388	0.137841	15	14	0.145619		277	158	53
2139.06	4674.96	0.265209	246	189	84	0.916515	0.359397	0.916515	0.359397	15	14	0.376588		229	177	72	1.19464	0.232229	1.19464	0.232229	14	14	0.24563		236	199	94	0.480079	0.631171	0.480079	0.631171	15	14	0.651619		259	176	71	1.48388	0.137841	1.48388	0.137841	15	14	0.145619		277	158	53
2140.99	4670.75	0.265448	247	188	83	0.960159	0.336976	0.960159	0.336976	15	14	0.353554		229	177	72	1.19464	0.232229	1.19464	0.232229	14	14	0.24563		236	199	94	0.480079	0.631171	0.480079	0.631171	15	14	0.651619		259	176	71	1.48388	0.137841	1.48388	0.137841	15	14	0.145619		277	158	53
2142.91	4666.54	0.265688	247	188	83	0.960159	0.336976	0.960159	0.336976	15	14	0.353554		229	177	72	1.19464	0.232229	1.19464	0.232229	14	14	0.24563		235	200	95	0.436436	0.662521	0.436436	0.662521	15	14	0.682954		259	176	71	1.48388	0.137841	1.48388	0.137841	15	14	0.145619		277	158	53
2144.84	4662.35	0.265927	247	188	83	0.960159	0.336976	0.960159	0.336976	15	14	0.353554		229	177	72	1.19464	0.232229	1.19464	0.232229	14	14	0.24563		235	200	95	0.436436	0.662521	0.436436	0.662521	15	14	0.682954		258	177	72	1.44024	0.149801	1.44024	0.149801	15	14	0.158309		277	158	53
2146.77	4658.16	0.266166	247	188	83	0.960159	0.336976	0.960159	0.336976	15	14	0.353554		229	177	72	1.19464	0.232229	1.19464	0.232229	14	14	0.24563		235	200	95	0.436436	0.662521	0.436436	0.662521	15	14	0.682954		258	177	72	1.44024	0.149801	1.44024	0.149801	15	14	0.158309		277	158	53
2148.7	4653.97	0.266405	247	188	83	0.960159	0.336976	0.960159	0.336976	15	14	0.353554		229	177	72	1.19464	0.232229	1.19464	0.232229	14	14	0.24563		235	200	95	0.436436	0.662521	0.436436	0.662521	15	14	0.682954		258	177	72	1.44024	0.149801	1.44024	0.149801	15	14	0.158309		277	158	53
2150.63	4649.8	0.266644	247	188	83	0.960159	0.336976	0.960159	0.336976	15	14	0.353554		228	178	73	1.14869	0.250684	1.14869	0.250684	14	14	0.26491		235	200	95	0.436436	0.662521	0.436436	0.662521	15	14	0.682954		258	177	72	1.44024	0.149801	1.44024	0.149801	15	14	0.158309		277	158	53
2152.56	4645.63	0.266883	247	188	83	0.960159	0.336976	0.960159	0.336976	15	14	0.353554		229	177	72	1.19464	0.232229	1.19464	0.232229	14	14	0.24563		236	199	94	0.480079	0.631171	0.480079	0.631171	15	14	0.651619		261	174	69	1.57117	0.116144	1.57117	0.116144	15	14	0.122524		277	158	53
2154.49	4641.48	0.267122	248	187	82	1.0038	0.315475	1.0038	0.315475	15	14	0.331405		229	177	72	1.19464	0.232229	1.19464	0.232229	14	14	0.24563		236	199	94	0.480079	0.631171	0.480079	0.631171	15	14	0.651619		261	174	69	1.57117	0.116144	1.57117	0.116144	15	14	0.122524		278	157	52
2156.42	4637.32	0.267362	248	187	82	1.0038	0.315475	1.0038	0.315475	15	14	0.331405		229	177	72	1.19464	0.232229	1.19464	0.232229	14	14	0.24563		236	199	94	0.480079	0.631171	0.480079	0.631171	15	14	0.651619		260	175	70	1.52753	0.126631	1.52753	0.126631	15	14	0.1337		278	157	52
2158.35	4633.18	0.267601	248	187	82	1.0038	0.315475	1.0038	0.315475	15	14	0.331405		229	177	72	1.19464	0.232229	1.19464	0.232229	14	14	0.24563		236	199	94	0.480079	0.631171	0.480079	0.631171	15	14	0.651619		261	174	69	1.57117	0.116144	1.57117	0.116144	15	14	0.122524		278	157	52
2160.27	4629.04	0.26784	248	187	82	1.0038	0.315475	1.0038	0.315475	15	14	0.331405		229	177	72	1.19464	0.232229	1.19464	0.232229	14	14	0.24563		236	199	94	0.480079	0.631171	0.480079	0.631171	15	14	0.651619		261	174	69	1.57117	0.116144	1.57117	0.116144	15	14	0.122524		278	157	52
2162.2	4624.91	0.268079	248	187	82	1.0038	0.315475	1.0038	0.315475	15	14	0.331405		228	178	73	1.14869	0.250684	1.14869	0.250684	14	14	0.26491		236	199	94	0.480079	0.631171	0.480079	0.631171	15	14	0.651619		261	174	69	1.57117	0.116144	1.57117	0.116144	15	14	0.122524		278	157	52
2164.13	4620.79	0.268318	248	187	82	1.0038	0.315475	1.0038	0.315475	15	14	0.331405		229	177	72	1.19464	0.232229	1.19464	0.232229	14	14	0.24563		236	199	94	0.480079	0.631171	0.480079	0.631171	15	14	0.651619		262	173	68	1.61481	0.106352	1.61481	0.106352	15	14	0.11207		278	157	52
2166.06	4616.68	0.268557	248	187	82	1.0038	0.315475	1.0038	0.315475	15	14	0.331405		229	177	72	1.19464	0.232229	1.19464	0.232229	14	14	0.24563		236	199	94	0.480079	0.631171	0.480079	0.631171	15	14	0.651619		262	173	68	1.61481	0.106352	1.61481	0.106352	15	14	0.11207		278	157	52
2167.99	4612.57	0.268796	249	186	81	1.04745	0.294895	1.04745	0.294895	15	14	0.310143		229	177	72	1.19464	0.232229	1.19464	0.232229	14	14	0.24563		236	199	94	0.480079	0.631171	0.480079	0.631171	15	14	0.651619		263	172	67	1.65846	0.097226	1.65846	0.097226	15	14	0.102309		278	157	52
2169.92	4608.47	0.269036	249	186	81	1.04745	0.294895	1.04745	0.294895	15	14	0.310143		228	178	73	1.14869	0.250684	1.14869	0.250684	14	14	0.26491		236	199	94	0.480079	0.631171	0.480079	0.631171	15	14	0.651619		263	172	67	1.65846	0.097226	1.65846	0.097226	15	14	0.102309		278	157	52
2171.85	4604.38	0.269275	249	186	81	1.04745	0.294895	1.04745	0.294895	15	14	0.310143		228	178	73	1.14869	0.250684	1.14869	0.250684	14	14	0.26491		236	199	94	0.480079	0.631171	0.480079	0.631171	15	14	0.651619		263	172	67	1.65846	0.097226	1.65846	0.097226	15	14	0.102309		278	157	52
2173.78	4600.29	0.269514	249	186	81	1.04745	0.294895	1.04745	0.294895	15	14	0.310143		228	178	73	1.14869	0.250684	1.14869	0.250684	14	14	0.26491		236	199	94	0.480079	0.631171	0.480079	0.631171	15	14	0.651619		263	172	67	1.65846	0.097226	1.65846	0.097226	15	14	0.102309		277	158	53
2175.7	4596.21	0.269753	249	186	81	1.04745	0.294895	1.04745	0.294895	15	14	0.310143		228	178	73	1.14869	0.250684	1.14869	0.250684	14	14	0.26491		236	199	94	0.480079	0.631171	0.480079	0.631171	15	14	0.651619		262	173	68	1.61481	0.106352	1.61481	0.106352	15	14	0.11207		277	158	53
2177.63	4592.14	0.269992	249	186	81	1.04745	0.294895	1.04745	0.294895	15	14	0.310143		228	178	73	1.14869	0.250684	1.14869	0.250684	14	14	0.26491		236	199	94	0.480079	0.631171	0.480079	0.631171	15	14	0.651619		262	173	68	1.61481	0.106352	1.61481	0.106352	15	14	0.11207		277	158	53
2179.56	4588.08	0.270231	249	186	81	1.04745	0.294895	1.04745	0.294895	15	14	0.310143		228	178	73	1.14869	0.250684	1.14869	0.250684	14	14	0.26491		236	199	94	0.480079	0.631171	0.480079	0.631171	15	14	0.651619		262	173	68	1.61481	0.106352	1.61481	0.106352	15	14	0.11207		277	158	53
2181.49	4584.02	0.27047	250	185	80	1.09109	0.275234	1.09109	0.275234	15	14	0.289776		228	178	73	1.14869	0.250684	1.14869	0.250684	14	14	0.26491		236	199	94	0.480079	0.631171	0.480079	0.631171	15	14	0.651619		262	173	68	1.61481	0.106352	1.61481	0.106352	15	14	0.11207		277	158	53
2183.42	4579.97	0.27071	250	185	80	1.09109	0.275234	1.09109	0.275234	15	14	0.289776		228	178	73	1.14869	0.250684	1.14869	0.250684	14	14	0.26491		236	199	94	0.480079	0.631171	0.480079	0.631171	15	14	0.651619		262	173	68	1.61481	0.106352	1.61481	0.106352	15	14	0.11207		277	158	53
2185.35	4575.93	0.270949	250	185	80	1.09109	0.275234	1.09109	0.275234	15	14	0.289776		229	177	72	1.19464	0.232229	1.19464	0.232229	14	14	0.24563		236	199	94	0.480079	0.631171	0.480079	0.631171	15	14	0.651619		262	173	68	1.61481	0.106352	1.61481	0.106352	15	14	0.11207		278	157	52
2187.28	4571.89	0.271188	252	183	78	1.17838	0.238647	1.17838	0.238647	15	14	0.251712		229	177	72	1.19464	0.232229	1.19464	0.232229	14	14	0.24563		236	199	94	0.480079	0.631171	0.480079	0.631171	15	14	0.651619		262	173	68	1.61481	0.106352	1.61481	0.106352	15	14	0.11207		278	157	52
2189.21	4567.87	0.271427	252	183	78	1.17838	0.238647	1.17838	0.238647	15	14	0.251712		229	177	72	1.19464	0.232229	1.19464	0.232229	14	14	0.24563		236	199	94	0.480079	0.631171	0.480079	0.631171	15	14	0.651619		262	173	68	1.61481	0.106352	1.61481	0.106352	15	14	0.11207		278	157	52
2191.13	4563.84	0.271666	251	184	79	1.13473	0.256488	1.13473	0.256488	15	14	0.270299		229	177	72	1.19464	0.232229	1.19464	0.232229	14	14	0.24563		236	199	94	0.480079	0.631171	0.480079	0.631171	15	14	0.651619		262	173	68	1.61481	0.106352	1.61481	0.106352	15	14	0.11207		278	157	52
2193.06	4559.83	0.271905	251	184	79	1.13473	0.256488	1.13473	0.256488	15	14	0.270299		229	177	72	1.19464	0.232229	1.19464	0.232229	14	14	0.24563		236	199	94	0.480079	0.631171	0.480079	0.631171	15	14	0.651619		262	173	68	1.61481	0.106352	1.61481	0.106352	15	14	0.11207		278	157	52
2194.99	4555.82	0.272144	252	183	78	1.17838	0.238647	1.17838	0.238647	15	14	0.251712		229	177	72	1.19464	0.232229	1.19464	0.232229	14	14	0.24563		236	199	94	0.480079	0.631171	0.480079	0.631171	15	14	0.651619		262	173	68	1.61481	0.106352	1.61481	0.106352	15	14	0.11207		278	157	52
2196.92	4551.82	0.272384	252	183	78	1.17838	0.238647	1.17838	0.238647	15	14	0.251712		229	177	72	1.19464	0.232229	1.19464	0.232229	14	14	0.24563		236	199	94	0.480079	0.631171	0.480079	0.631171	15	14	0.651619		262	173	68	1.61481	0.106352	1.61481	0.106352	15	14	0.11207		278	157	52
2198.85	4547.83	0.272623	252	183	78	1.17838	0.238647	1.17838	0.238647	15	14	0.251712		228	178	73	1.14869	0.250684	1.14869	0.250684	14	14	0.26491		236	199	94	0.480079	0.631171	0.480079	0.631171	15	14	0.651619		262	173	68	1.61481	0.106352	1.61481	0.106352	15	14	0.11207		279	156	51
2200.78	4543.85	0.272862	252	183	78	1.17838	0.238647	1.17838	0.238647	15	14	0.251712		228	178	73	1.14869	0.250684	1.14869	0.250684	14	14	0.26491		236	199	94	0.480079	0.631171	0.480079	0.631171	15	14	0.651619		261	174	69	1.57117	0.116144	1.57117	0.116144	15	14	0.122524		278	157	52
2202.71	4539.87	0.273101	252	183	78	1.17838	0.238647	1.17838	0.238647	15	14	0.251712		228	178	73	1.14869	0.250684	1.14869	0.250684	14	14	0.26491		236	199	94	0.480079	0.631171	0.480079	0.631171	15	14	0.651619		261	174	69	1.57117	0.116144	1.57117	0.116144	15	14	0.122524		278	157	52
2204.64	4535.89	0.27334	252	183	78	1.17838	0.238647	1.17838	0.238647	15	14	0.251712		228	178	73	1.14869	0.250684	1.14869	0.250684	14	14	0.26491		236	199	94	0.480079	0.631171	0.480079	0.631171	15	14	0.651619		261	174	69	1.57117	0.116144	1.57117	0.116144	15	14	0.122524		278	157	52
2206.57	4531.93	0.273579	252	183	78	1.17838	0.238647	1.17838	0.238647	15	14	0.251712		229	177	72	1.19464	0.232229	1.19464	0.232229	14	14	0.24563		236	199	94	0.480079	0.631171	0.480079	0.631171	15	14	0.651619		261	174	69	1.57117	0.116144	1.57117	0.116144	15	14	0.122524		279	156	51
2208.49	4527.97	0.273818	252	183	78	1.17838	0.238647	1.17838	0.238647	15	14	0.251712		229	177	72	1.19464	0.232229	1.19464	0.232229	14	14	0.24563		236	199	94	0.480079	0.631171	0.480079	0.631171	15	14	0.651619		262	173	68	1.61481	0.106352	1.61481	0.106352	15	14	0.11207		279	156	51
2210.42	4524.02	0.274058	252	183	78	1.17838	0.238647	1.17838	0.238647	15	14	0.251712		229	177	72	1.19464	0.232229	1.19464	0.232229	14	14	0.24563		236	199	94	0.480079	0.631171	0.480079	0.631171	15	14	0.651619		261	174	69	1.57117	0.116144	1.57117	0.116144	15	14	0.122524		278	157	52
2212.35	4520.08	0.274297	252	183	78	1.17838	0.238647	1.17838	0.238647	15	14	0.251712		230	176	71	1.24059	0.214759	1.24059	0.214759	14	14	0.227321		236	199	94	0.480079	0.631171	0.480079	0.631171	15	14	0.651619		261	174	69	1.57117	0.116144	1.57117	0.116144	15	14	0.122524		277	158	53
2214.28	4516.14	0.274536	252	183	78	1.17838	0.238647	1.17838	0.238647	15	14	0.251712		229	177	72	1.19464	0.232229	1.19464	0.232229	14	14	0.24563		236	199	94	0.480079	0.631171	0.480079	0.631171	15	14	0.651619		261	174	69	1.57117	0.116144	1.57117	0.116144	15	14	0.122524		278	157	52
2216.21	4512.21	0.274775	253	182	77	1.22202	0.221701	1.22202	0.221701	15	14	0.234007		228	178	73	1.14869	0.250684	1.14869	0.250684	14	14	0.26491		236	199	94	0.480079	0.631171	0.480079	0.631171	15	14	0.651619		261	174	69	1.57117	0.116144	1.57117	0.116144	15	14	0.122524		278	157	52
2218.14	4508.28	0.275014	253	182	77	1.22202	0.221701	1.22202	0.221701	15	14	0.234007		228	178	73	1.14869	0.250684	1.14869	0.250684	14	14	0.26491		236	199	94	0.480079	0.631171	0.480079	0.631171	15	14	0.651619		261	174	69	1.57117	0.116144	1.57117	0.116144	15	14	0.122524		278	157	52
2220.07	4504.37	0.275253	253	182	77	1.22202	0.221701	1.22202	0.221701	15	14	0.234007		229	177	72	1.19464	0.232229	1.19464	0.232229	14	14	0.24563		236	199	94	0.480079	0.631171	0.480079	0.631171	15	14	0.651619		261	174	69	1.57117	0.116144	1.57117	0.116144	15	14	0.122524		278	157	52
2222	4500.46	0.275492	253	182	77	1.22202	0.221701	1.22202	0.221701	15	14	0.234007		228	178	73	1.14869	0.250684	1.14869	0.250684	14	14	0.26491		236	199	94	0.480079	0.631171	0.480079	0.631171	15	14	0.651619		261	174	69	1.57117	0.116144	1.57117	0.116144	15	14	0.122524		278	157	52
2223.92	4496.55	0.275732	253	182	77	1.22202	0.221701	1.22202	0.221701	15	14	0.234007		229	177	72	1.19464	0.232229	1.19464	0.232229	14	14	0.24563		236	199	94	0.480079	0.631171	0.480079	0.631171	15	14	0.651619		261	174	69	1.57117	0.116144	1.57117	0.116144	15	14	0.122524		278	157	52
2225.85	4492.66	0.275971	252	183	78	1.17838	0.238647	1.17838	0.238647	15	14	0.251712		229	177	72	1.19464	0.232229	1.19464	0.232229	14	14	0.24563		236	199	94	0.480079	0.631171	0.480079	0.631171	15	14	0.651619		261	174	69	1.57117	0.116144	1.57117	0.116144	15	14	0.122524		279	156	51
2227.78	4488.77	0.27621	251	184	79	1.13473	0.256488	1.13473	0.256488	15	14	0.270299		229	177	72	1.19464	0.232229	1.19464	0.232229	14	14	0.24563		236	199	94	0.480079	0.631171	0.480079	0.631171	15	14	0.651619		261	174	69	1.57117	0.116144	1.57117	0.116144	15	14	0.122524		278	157	52
2229.71	4484.89	0.276449	250	185	80	1.09109	0.275234	1.09109	0.275234	15	14	0.289776		228	178	73	1.14869	0.250684	1.14869	0.250684	14	14	0.26491		235	200	95	0.436436	0.662521	0.436436	0.662521	15	14	0.682954		261	174	69	1.57117	0.116144	1.57117	0.116144	15	14	0.122524		278	157	52
2231.64	4481.01	0.276688	250	185	80	1.09109	0.275234	1.09109	0.275234	15	14	0.289776		229	177	72	1.19464	0.232229	1.19464	0.232229	14	14	0.24563		235	200	95	0.436436	0.662521	0.436436	0.662521	15	14	0.682954		261	174	69	1.57117	0.116144	1.57117	0.116144	15	14	0.122524		277	158	53
2233.57	4477.14	0.276927	252	183	78	1.17838	0.238647	1.17838	0.238647	15	14	0.251712		230	176	71	1.24059	0.214759	1.24059	0.214759	14	14	0.227321		235	200	95	0.436436	0.662521	0.436436	0.662521	15	14	0.682954		260	175	70	1.52753	0.126631	1.52753	0.126631	15	14	0.1337		278	157	52
2235.5	4473.28	0.277166	252	183	78	1.17838	0.238647	1.17838	0.238647	15	14	0.251712		230	176	71	1.24059	0.214759	1.24059	0.214759	14	14	0.227321		235	200	95	0.436436	0.662521	0.436436	0.662521	15	14	0.682954		260	175	70	1.52753	0.126631	1.52753	0.126631	15	14	0.1337		279	156	51
2237.43	4469.42	0.277406	251	184	79	1.13473	0.256488	1.13473	0.256488	15	14	0.270299		230	176	71	1.24059	0.214759	1.24059	0.214759	14	14	0.227321		235	200	95	0.436436	0.662521	0.436436	0.662521	15	14	0.682954		260	175	70	1.52753	0.126631	1.52753	0.126631	15	14	0.1337		279	156	51
2239.36	4465.57	0.277645	251	184	79	1.13473	0.256488	1.13473	0.256488	15	14	0.270299		230	176	71	1.24059	0.214759	1.24059	0.214759	14	14	0.227321		235	200	95	0.436436	0.662521	0.436436	0.662521	15	14	0.682954		260	175	70	1.52753	0.126631	1.52753	0.126631	15	14	0.1337		278	157	52
2241.28	4461.73	0.277884	251	184	79	1.13473	0.256488	1.13473	0.256488	15	14	0.270299		229	177	72	1.19464	0.232229	1.19464	0.232229	14	14	0.24563		235	200	95	0.436436	0.662521	0.436436	0.662521	15	14	0.682954		260	175	70	1.52753	0.126631	1.52753	0.126631	15	14	0.1337		279	156	51
2243.21	4457.89	0.278123	251	184	79	1.13473	0.256488	1.13473	0.256488	15	14	0.270299		229	177	72	1.19464	0.232229	1.19464	0.232229	14	14	0.24563		235	200	95	0.436436	0.662521	0.436436	0.662521	15	14	0.682954		260	175	70	1.52753	0.126631	1.52753	0.126631	15	14	0.1337		278	157	52
2245.14	4454.06	0.278362	251	184	79	1.13473	0.256488	1.13473	0.256488	15	14	0.270299		229	177	72	1.19464	0.232229	1.19464	0.232229	14	14	0.24563		235	200	95	0.436436	0.662521	0.436436	0.662521	15	14	0.682954		261	174	69	1.57117	0.116144	1.57117	0.116144	15	14	0.122524		279	156	51
2247.07	4450.24	0.278601	251	184	79	1.13473	0.256488	1.13473	0.256488	15	14	0.270299		229	177	72	1.19464	0.232229	1.19464	0.232229	14	14	0.24563		235	200	95	0.436436	0.662521	0.436436	0.662521	15	14	0.682954		261	174	69	1.57117	0.116144	1.57117	0.116144	15	14	0.122524		279	156	51
2249	4446.42	0.27884	251	184	79	1.13473	0.256488	1.13473	0.256488	15	14	0.270299		229	177	72	1.19464	0.232229	1.19464	0.232229	14	14	0.24563		235	200	95	0.436436	0.662521	0.436436	0.662521	15	14	0.682954		260	175	70	1.52753	0.126631	1.52753	0.126631	15	14	0.1337		279	156	51
2250.93	4442.61	0.27908	251	184	79	1.13473	0.256488	1.13473	0.256488	15	14	0.270299		229	177	72	1.19464	0.232229	1.19464	0.232229	14	14	0.24563		235	200	95	0.436436	0.662521	0.436436	0.662521	15	14	0.682954		259	176	71	1.48388	0.137841	1.48388	0.137841	15	14	0.145619		279	156	51
2252.86	4438.81	0.279319	251	184	79	1.13473	0.256488	1.13473	0.256488	15	14	0.270299		230	176	71	1.24059	0.214759	1.24059	0.214759	14	14	0.227321		235	200	95	0.436436	0.662521	0.436436	0.662521	15	14	0.682954		259	176	71	1.48388	0.137841	1.48388	0.137841	15	14	0.145619		279	156	51
2254.79	4435.01	0.279558	251	184	79	1.13473	0.256488	1.13473	0.256488	15	14	0.270299		229	177	72	1.19464	0.232229	1.19464	0.232229	14	14	0.24563		235	200	95	0.436436	0.662521	0.436436	0.662521	15	14	0.682954		259	176	71	1.48388	0.137841	1.48388	0.137841	15	14	0.145619		277	158	53
2256.71	4431.22	0.279797	251	184	79	1.13473	0.256488	1.13473	0.256488	15	14	0.270299		229	177	72	1.19464	0.232229	1.19464	0.232229	14	14	0.24563		235	200	95	0.436436	0.662521	0.436436	0.662521	15	14	0.682954		259	176	71	1.48388	0.137841	1.48388	0.137841	15	14	0.145619		278	157	52
2258.64	4427.44	0.280036	251	184	79	1.13473	0.256488	1.13473	0.256488	15	14	0.270299		229	177	72	1.19464	0.232229	1.19464	0.232229	14	14	0.24563		235	200	95	0.436436	0.662521	0.436436	0.662521	15	14	0.682954		259	176	71	1.48388	0.137841	1.48388	0.137841	15	14	0.145619		278	157	52
2260.57	4423.66	0.280275	251	184	79	1.13473	0.256488	1.13473	0.256488	15	14	0.270299		229	177	72	1.19464	0.232229	1.19464	0.232229	14	14	0.24563		235	200	95	0.436436	0.662521	0.436436	0.662521	15	14	0.682954		259	176	71	1.48388	0.137841	1.48388	0.137841	15	14	0.145619		278	157	52
2262.5	4419.89	0.280514	251	184	79	1.13473	0.256488	1.13473	0.256488	15	14	0.270299		228	178	73	1.14869	0.250684	1.14869	0.250684	14	14	0.26491		234	201	96	0.392792	0.694473	0.392792	0.694473	15	14	0.71483		259	176	71	1.48388	0.137841	1.48388	0.137841	15	14	0.145619		277	158	53
2264.43	4416.12	0.280754	250	185	80	1.09109	0.275234	1.09109	0.275234	15	14	0.289776		228	178	73	1.14869	0.250684	1.14869	0.250684	14	14	0.26491		234	201	96	0.392792	0.694473	0.392792	0.694473	15	14	0.71483		259	176	71	1.48388	0.137841	1.48388	0.137841	15	14	0.145619		277	158	53
2266.36	4412.36	0.280993	250	185	80	1.09109	0.275234	1.09109	0.275234	15	14	0.289776		228	178	73	1.14869	0.250684	1.14869	0.250684	14	14	0.26491		234	201	96	0.392792	0.694473	0.392792	0.694473	15	14	0.71483		259	176	71	1.48388	0.137841	1.48388	0.137841	15	14	0.145619		277	158	53
2268.29	4408.61	0.281232	250	185	80	1.09109	0.275234	1.09109	0.275234	15	14	0.289776		228	178	73	1.14869	0.250684	1.14869	0.250684	14	14	0.26491		233	202	97	0.349149	0.726978	0.349149	0.726978	15	14	0.747192		258	177	72	1.44024	0.149801	1.44024	0.149801	15	14	0.158309		277	158	53
2270.22	4404.87	0.281471	250	185	80	1.09109	0.275234	1.09109	0.275234	15	14	0.289776		227	179	74	1.10274	0.270139	1.10274	0.270139	14	14	0.285176		233	202	97	0.349149	0.726978	0.349149	0.726978	15	14	0.747192		259	176	71	1.48388	0.137841	1.48388	0.137841	15	14	0.145619		277	158	53
2272.15	4401.13	0.28171	250	185	80	1.09109	0.275234	1.09109	0.275234	15	14	0.289776		227	179	74	1.10274	0.270139	1.10274	0.270139	14	14	0.285176		233	202	97	0.349149	0.726978	0.349149	0.726978	15	14	0.747192		258	177	72	1.44024	0.149801	1.44024	0.149801	15	14	0.158309		278	157	52
2274.07	4397.39	0.281949	250	185	80	1.09109	0.275234	1.09109	0.275234	15	14	0.289776		227	179	74	1.10274	0.270139	1.10274	0.270139	14	14	0.285176		233	202	97	0.349149	0.726978	0.349149	0.726978	15	14	0.747192		258	177	72	1.44024	0.149801	1.44024	0.149801	15	14	0.158309		277	158	53
2276	4393.67	0.282188	250	185	80	1.09109	0.275234	1.09109	0.275234	15	14	0.289776		227	179	74	1.10274	0.270139	1.10274	0.270139	14	14	0.285176		233	202	97	0.349149	0.726978	0.349149	0.726978	15	14	0.747192		258	177	72	1.44024	0.149801	1.44024	0.149801	15	14	0.158309		277	158	53
2277.93	4389.95	0.282428	250	185	80	1.09109	0.275234	1.09109	0.275234	15	14	0.289776		229	177	72	1.19464	0.232229	1.19464	0.232229	14	14	0.24563		233	202	97	0.349149	0.726978	0.349149	0.726978	15	14	0.747192		258	177	72	1.44024	0.149801	1.44024	0.149801	15	14	0.158309		277	158	53
2279.86	4386.23	0.282667	250	185	80	1.09109	0.275234	1.09109	0.275234	15	14	0.289776		229	177	72	1.19464	0.232229	1.19464	0.232229	14	14	0.24563		233	202	97	0.349149	0.726978	0.349149	0.726978	15	14	0.747192		259	176	71	1.48388	0.137841	1.48388	0.137841	15	14	0.145619		277	158	53
2281.79	4382.53	0.282906	250	185	80	1.09109	0.275234	1.09109	0.275234	15	14	0.289776		229	177	72	1.19464	0.232229	1.19464	0.232229	14	14	0.24563		233	202	97	0.349149	0.726978	0.349149	0.726978	15	14	0.747192		260	175	70	1.52753	0.126631	1.52753	0.126631	15	14	0.1337		277	158	53
2283.72	4378.82	0.283145	250	185	80	1.09109	0.275234	1.09109	0.275234	15	14	0.289776		228	178	73	1.14869	0.250684	1.14869	0.250684	14	14	0.26491		233	202	97	0.349149	0.726978	0.349149	0.726978	15	14	0.747192		258	177	72	1.44024	0.149801	1.44024	0.149801	15	14	0.158309		277	158	53
2285.65	4375.13	0.283384	250	185	80	1.09109	0.275234	1.09109	0.275234	15	14	0.289776		227	179	74	1.10274	0.270139	1.10274	0.270139	14	14	0.285176		233	202	97	0.349149	0.726978	0.349149	0.726978	15	14	0.747192		258	177	72	1.44024	0.149801	1.44024	0.149801	15	14	0.158309		276	159	54
2287.58	4371.44	0.283623	249	186	81	1.04745	0.294895	1.04745	0.294895	15	14	0.310143		227	179	74	1.10274	0.270139	1.10274	0.270139	14	14	0.285176		233	202	97	0.349149	0.726978	0.349149	0.726978	15	14	0.747192		257	178	73	1.39659	0.162537	1.39659	0.162537	15	14	0.171789		277	158	53
2289.5	4367.76	0.283862	249	186	81	1.04745	0.294895	1.04745	0.294895	15	14	0.310143		228	178	73	1.14869	0.250684	1.14869	0.250684	14	14	0.26491		234	201	96	0.392792	0.694473	0.392792	0.694473	15	14	0.71483		257	178	73	1.39659	0.162537	1.39659	0.162537	15	14	0.171789		277	158	53
2291.43	4364.08	0.284102	248	187	82	1.0038	0.315475	1.0038	0.315475	15	14	0.331405		227	179	74	1.10274	0.270139	1.10274	0.270139	14	14	0.285176		234	201	96	0.392792	0.694473	0.392792	0.694473	15	14	0.71483		257	178	73	1.39659	0.162537	1.39659	0.162537	15	14	0.171789		277	158	53
2293.36	4360.41	0.284341	248	187	82	1.0038	0.315475	1.0038	0.315475	15	14	0.331405		227	179	74	1.10274	0.270139	1.10274	0.270139	14	14	0.285176		235	200	95	0.436436	0.662521	0.436436	0.662521	15	14	0.682954		258	177	72	1.44024	0.149801	1.44024	0.149801	15	14	0.158309		277	158	53
2295.29	4356.75	0.28458	248	187	82	1.0038	0.315475	1.0038	0.315475	15	14	0.331405		226	180	75	1.0568	0.290605	1.0568	0.290605	14	14	0.306426		235	200	95	0.436436	0.662521	0.436436	0.662521	15	14	0.682954		257	178	73	1.39659	0.162537	1.39659	0.162537	15	14	0.171789		276	159	54
2297.22	4353.09	0.284819	249	186	81	1.04745	0.294895	1.04745	0.294895	15	14	0.310143		227	179	74	1.10274	0.270139	1.10274	0.270139	14	14	0.285176		235	200	95	0.436436	0.662521	0.436436	0.662521	15	14	0.682954		258	177	72	1.44024	0.149801	1.44024	0.149801	15	14	0.158309		277	158	53
2299.15	4349.44	0.285058	251	184	79	1.13473	0.256488	1.13473	0.256488	15	14	0.270299		227	179	74	1.10274	0.270139	1.10274	0.270139	14	14	0.285176		234	201	96	0.392792	0.694473	0.392792	0.694473	15	14	0.71483		258	177	72	1.44024	0.149801	1.44024	0.149801	15	14	0.158309		278	157	52
2301.08	4345.79	0.285297	250	185	80	1.09109	0.275234	1.09109	0.275234	15	14	0.289776		226	180	75	1.0568	0.290605	1.0568	0.290605	14	14	0.306426		234	201	96	0.392792	0.694473	0.392792	0.694473	15	14	0.71483		257	178	73	1.39659	0.162537	1.39659	0.162537	15	14	0.171789		278	157	52
2303.01	4342.15	0.285536	251	184	79	1.13473	0.256488	1.13473	0.256488	15	14	0.270299		226	180	75	1.0568	0.290605	1.0568	0.290605	14	14	0.306426		235	200	95	0.436436	0.662521	0.436436	0.662521	15	14	0.682954		256	179	74	1.35295	0.176072	1.35295	0.176072	15	14	0.186083		279	156	51
2304.94	4338.52	0.285776	250	185	80	1.09109	0.275234	1.09109	0.275234	15	14	0.289776		226	180	75	1.0568	0.290605	1.0568	0.290605	14	14	0.306426		236	199	94	0.480079	0.631171	0.480079	0.631171	15	14	0.651619		257	178	73	1.39659	0.162537	1.39659	0.162537	15	14	0.171789		278	157	52
2306.86	4334.89	0.286015	251	184	79	1.13473	0.256488	1.13473	0.256488	15	14	0.270299		226	180	75	1.0568	0.290605	1.0568	0.290605	14	14	0.306426		241	194	89	0.698297	0.484992	0.698297	0.484992	15	14	0.504539		258	177	72	1.44024	0.149801	1.44024	0.149801	15	14	0.158309		278	157	52
2308.79	4331.27	0.286254	248	187	82	1.0038	0.315475	1.0038	0.315475	15	14	0.331405		227	179	74	1.10274	0.270139	1.10274	0.270139	14	14	0.285176		243	192	87	0.785584	0.432112	0.785584	0.432112	15	14	0.450872		257	178	73	1.39659	0.162537	1.39659	0.162537	15	14	0.171789		278	157	52
2310.72	4327.65	0.286493	246	189	84	0.916515	0.359397	0.916515	0.359397	15	14	0.376588		225	181	76	1.01085	0.312089	1.01085	0.312089	14	14	0.328667		244	191	86	0.829228	0.406976	0.829228	0.406976	15	14	0.425262		257	178	73	1.39659	0.162537	1.39659	0.162537	15	14	0.171789		274	161	56
2312.65	4324.04	0.286732	246	189	84	0.916515	0.359397	0.916515	0.359397	15	14	0.376588		225	181	76	1.01085	0.312089	1.01085	0.312089	14	14	0.328667		243	192	87	0.785584	0.432112	0.785584	0.432112	15	14	0.450872		256	179	74	1.35295	0.176072	1.35295	0.176072	15	14	0.186083		275	160	55
2314.58	4320.44	0.286971	244	191	86	0.829228	0.406976	0.829228	0.406976	15	14	0.425262		225	181	76	1.01085	0.312089	1.01085	0.312089	14	14	0.328667		246	189	84	0.916515	0.359397	0.916515	0.359397	15	14	0.376588		257	178	73	1.39659	0.162537	1.39659	0.162537	15	14	0.171789		277	158	53
2316.51	4316.84	0.28721	244	191	86	0.829228	0.406976	0.829228	0.406976	15	14	0.425262		225	181	76	1.01085	0.312089	1.01085	0.312089	14	14	0.328667		250	185	80	1.09109	0.275234	1.09109	0.275234	15	14	0.289776		256	179	74	1.35295	0.176072	1.35295	0.176072	15	14	0.186083		277	158	53
2318.44	4313.25	0.28745	243	192	87	0.785584	0.432112	0.785584	0.432112	15	14	0.450872		225	181	76	1.01085	0.312089	1.01085	0.312089	14	14	0.328667		252	183	78	1.17838	0.238647	1.17838	0.238647	15	14	0.251712		253	182	77	1.22202	0.221701	1.22202	0.221701	15	14	0.234007		275	160	55
2320.37	4309.67	0.287689	244	191	86	0.829228	0.406976	0.829228	0.406976	15	14	0.425262		224	182	77	0.964901	0.334595	0.964901	0.334595	14	14	0.35189		257	178	73	1.39659	0.162537	1.39659	0.162537	15	14	0.171789		251	184	79	1.13473	0.256488	1.13473	0.256488	15	14	0.270299		276	159	54
2322.29	4306.09	0.287928	241	194	89	0.698297	0.484992	0.698297	0.484992	15	14	0.504539		222	184	79	0.873006	0.382661	0.873006	0.382661	14	14	0.401263		256	179	74	1.35295	0.176072	1.35295	0.176072	15	14	0.186083		252	183	78	1.17838	0.238647	1.17838	0.238647	15	14	0.251712		276	159	54
2324.22	4302.51	0.288167	242	193	88	0.741941	0.458124	0.741941	0.458124	15	14	0.477307		223	183	78	0.918954	0.358121	0.918954	0.358121	14	14	0.376095		257	178	73	1.39659	0.162537	1.39659	0.162537	15	14	0.171789		252	183	78	1.17838	0.238647	1.17838	0.238647	15	14	0.251712		275	160	55
2326.15	4298.95	0.288406	243	192	87	0.785584	0.432112	0.785584	0.432112	15	14	0.450872		222	184	79	0.873006	0.382661	0.873006	0.382661	14	14	0.401263		257	178	73	1.39659	0.162537	1.39659	0.162537	15	14	0.171789		252	183	78	1.17838	0.238647	1.17838	0.238647	15	14	0.251712		274	161	56
2328.08	4295.38	0.288645	243	192	87	0.785584	0.432112	0.785584	0.432112	15	14	0.450872		223	183	78	0.918954	0.358121	0.918954	0.358121	14	14	0.376095		257	178	73	1.39659	0.162537	1.39659	0.162537	15	14	0.171789		251	184	79	1.13473	0.256488	1.13473	0.256488	15	14	0.270299		273	162	57
2330.01	4291.83	0.288884	243	192	87	0.785584	0.432112	0.785584	0.432112	15	14	0.450872		225	181	76	1.01085	0.312089	1.01085	0.312089	14	14	0.328667		257	178	73	1.39659	0.162537	1.39659	0.162537	15	14	0.171789		250	185	80	1.09109	0.275234	1.09109	0.275234	15	14	0.289776		271	164	59
2331.94	4288.28	0.289124	242	193	88	0.741941	0.458124	0.741941	0.458124	15	14	0.477307		225	181	76	1.01085	0.312089	1.01085	0.312089	14	14	0.328667		257	178	73	1.39659	0.162537	1.39659	0.162537	15	14	0.171789		249	186	81	1.04745	0.294895	1.04745	0.294895	15	14	0.310143		271	164	59
2333.87	4284.73	0.289363	242	193	88	0.741941	0.458124	0.741941	0.458124	15	14	0.477307		224	182	77	0.964901	0.334595	0.964901	0.334595	14	14	0.35189		257	178	73	1.39659	0.162537	1.39659	0.162537	15	14	0.171789		249	186	81	1.04745	0.294895	1.04745	0.294895	15	14	0.310143		271	164	59
2335.8	4281.2	0.289602	243	192	87	0.785584	0.432112	0.785584	0.432112	15	14	0.450872		224	182	77	0.964901	0.334595	0.964901	0.334595	14	14	0.35189		257	178	73	1.39659	0.162537	1.39659	0.162537	15	14	0.171789		250	185	80	1.09109	0.275234	1.09109	0.275234	15	14	0.289776		271	164	59
2337.72	4277.66	0.289841	243	192	87	0.785584	0.432112	0.785584	0.432112	15	14	0.450872		224	182	77	0.964901	0.334595	0.964901	0.334595	14	14	0.35189		257	178	73	1.39659	0.162537	1.39659	0.162537	15	14	0.171789		250	185	80	1.09109	0.275234	1.09109	0.275234	15	14	0.289776		270	165	60
2339.65	4274.14	0.29008	243	192	87	0.785584	0.432112	0.785584	0.432112	15	14	0.450872		223	183	78	0.918954	0.358121	0.918954	0.358121	14	14	0.376095		258	177	72	1.44024	0.149801	1.44024	0.149801	15	14	0.158309		249	186	81	1.04745	0.294895	1.04745	0.294895	15	14	0.310143		270	165	60
2341.58	4270.62	0.290319	243	192	87	0.785584	0.432112	0.785584	0.432112	15	14	0.450872		224	182	77	0.964901	0.334595	0.964901	0.334595	14	14	0.35189		257	178	73	1.39659	0.162537	1.39659	0.162537	15	14	0.171789		249	186	81	1.04745	0.294895	1.04745	0.294895	15	14	0.310143		270	165	60
2343.51	4267.1	0.290558	244	191	86	0.829228	0.406976	0.829228	0.406976	15	14	0.425262		224	182	77	0.964901	0.334595	0.964901	0.334595	14	14	0.35189		257	178	73	1.39659	0.162537	1.39659	0.162537	15	14	0.171789		249	186	81	1.04745	0.294895	1.04745	0.294895	15	14	0.310143		268	167	62
2345.44	4263.59	0.290798	241	194	89	0.698297	0.484992	0.698297	0.484992	15	14	0.504539		222	184	79	0.873006	0.382661	0.873006	0.382661	14	14	0.401263		255	180	75	1.30931	0.190431	1.30931	0.190431	15	14	0.201205		251	184	79	1.13473	0.256488	1.13473	0.256488	15	14	0.270299		272	163	58
2347.37	4260.09	0.291037	241	194	89	0.698297	0.484992	0.698297	0.484992	15	14	0.504539		221	185	80	0.827058	0.408205	0.827058	0.408205	14	14	0.427387		253	182	77	1.22202	0.221701	1.22202	0.221701	15	14	0.234007		252	183	78	1.17838	0.238647	1.17838	0.238647	15	14	0.251712		275	160	55
2349.3	4256.59	0.291276	243	192	87	0.785584	0.432112	0.785584	0.432112	15	14	0.450872		223	183	78	0.918954	0.358121	0.918954	0.358121	14	14	0.376095		257	178	73	1.39659	0.162537	1.39659	0.162537	15	14	0.171789		252	183	78	1.17838	0.238647	1.17838	0.238647	15	14	0.251712		275	160	55
2351.23	4253.1	0.291515	243	192	87	0.785584	0.432112	0.785584	0.432112	15	14	0.450872		223	183	78	0.918954	0.358121	0.918954	0.358121	14	14	0.376095		257	178	73	1.39659	0.162537	1.39659	0.162537	15	14	0.171789		251	184	79	1.13473	0.256488	1.13473	0.256488	15	14	0.270299		270	165	60
2353.16	4249.61	0.291754	244	191	86	0.829228	0.406976	0.829228	0.406976	15	14	0.425262		224	182	77	0.964901	0.334595	0.964901	0.334595	14	14	0.35189		255	180	75	1.30931	0.190431	1.30931	0.190431	15	14	0.201205		249	186	81	1.04745	0.294895	1.04745	0.294895	15	14	0.310143		269	166	61
2355.08	4246.13	0.291993	244	191	86	0.829228	0.406976	0.829228	0.406976	15	14	0.425262		224	182	77	0.964901	0.334595	0.964901	0.334595	14	14	0.35189		258	177	72	1.44024	0.149801	1.44024	0.149801	15	14	0.158309		249	186	81	1.04745	0.294895	1.04745	0.294895	15	14	0.310143		265	170	65
2357.01	4242.66	0.292232	244	191	86	0.829228	0.406976	0.829228	0.406976	15	14	0.425262		225	181	76	1.01085	0.312089	1.01085	0.312089	14	14	0.328667		258	177	72	1.44024	0.149801	1.44024	0.149801	15	14	0.158309		249	186	81	1.04745	0.294895	1.04745	0.294895	15	14	0.310143		265	170	65
2358.94	4239.19	0.292472	244	191	86	0.829228	0.406976	0.829228	0.406976	15	14	0.425262		224	182	77	0.964901	0.334595	0.964901	0.334595	14	14	0.35189		258	177	72	1.44024	0.149801	1.44024	0.149801	15	14	0.158309		247	188	83	0.960159	0.336976	0.960159	0.336976	15	14	0.353554		265	170	65
2360.87	4235.73	0.292711	244	191	86	0.829228	0.406976	0.829228	0.406976	15	14	0.425262		224	182	77	0.964901	0.334595	0.964901	0.334595	14	14	0.35189		258	177	72	1.44024	0.149801	1.44024	0.149801	15	14	0.158309		247	188	83	0.960159	0.336976	0.960159	0.336976	15	14	0.353554		265	170	65
2362.8	4232.27	0.29295	244	191	86	0.829228	0.406976	0.829228	0.406976	15	14	0.425262		225	181	76	1.01085	0.312089	1.01085	0.312089	14	14	0.328667		258	177	72	1.44024	0.149801	1.44024	0.149801	15	14	0.158309		248	187	82	1.0038	0.315475	1.0038	0.315475	15	14	0.331405		265	170	65
2364.73	4228.82	0.293189	244	191	86	0.829228	0.406976	0.829228	0.406976	15	14	0.425262		223	183	78	0.918954	0.358121	0.918954	0.358121	14	14	0.376095		257	178	73	1.39659	0.162537	1.39659	0.162537	15	14	0.171789		249	186	81	1.04745	0.294895	1.04745	0.294895	15	14	0.310143		265	170	65
2366.66	4225.37	0.293428	244	191	86	0.829228	0.406976	0.829228	0.406976	15	14	0.425262		224	182	77	0.964901	0.334595	0.964901	0.334595	14	14	0.35189		255	180	75	1.30931	0.190431	1.30931	0.190431	15	14	0.201205		249	186	81	1.04745	0.294895	1.04745	0.294895	15	14	0.310143		268	167	62
2368.59	4221.93	0.293667	244	191	86	0.829228	0.406976	0.829228	0.406976	15	14	0.425262		223	183	78	0.918954	0.358121	0.918954	0.358121	14	14	0.376095		257	178	73	1.39659	0.162537	1.39659	0.162537	15	14	0.171789		249	186	81	1.04745	0.294895	1.04745	0.294895	15	14	0.310143		268	167	62
2370.51	4218.49	0.293906	242	193	88	0.741941	0.458124	0.741941	0.458124	15	14	0.477307		225	181	76	1.01085	0.312089	1.01085	0.312089	14	14	0.328667		256	179	74	1.35295	0.176072	1.35295	0.176072	15	14	0.186083		251	184	79	1.13473	0.256488	1.13473	0.256488	15	14	0.270299		273	162	57
2372.44	4215.06	0.294146	241	194	89	0.698297	0.484992	0.698297	0.484992	15	14	0.504539		223	183	78	0.918954	0.358121	0.918954	0.358121	14	14	0.376095		251	184	79	1.13473	0.256488	1.13473	0.256488	15	14	0.270299		250	185	80	1.09109	0.275234	1.09109	0.275234	15	14	0.289776		275	160	55
2374.37	4211.64	0.294385	241	194	89	0.698297	0.484992	0.698297	0.484992	15	14	0.504539		222	184	79	0.873006	0.382661	0.873006	0.382661	14	14	0.401263		249	186	81	1.04745	0.294895	1.04745	0.294895	15	14	0.310143		254	181	76	1.26566	0.205634	1.26566	0.205634	15	14	0.217176		275	160	55
2376.3	4208.22	0.294624	241	194	89	0.698297	0.484992	0.698297	0.484992	15	14	0.504539		224	182	77	0.964901	0.334595	0.964901	0.334595	14	14	0.35189		246	189	84	0.916515	0.359397	0.916515	0.359397	15	14	0.376588		253	182	77	1.22202	0.221701	1.22202	0.221701	15	14	0.234007		277	158	53
2378.23	4204.81	0.294863	246	189	84	0.916515	0.359397	0.916515	0.359397	15	14	0.376588		222	184	79	0.873006	0.382661	0.873006	0.382661	14	14	0.401263		240	195	90	0.654654	0.512691	0.654654	0.512691	15	14	0.532545		252	183	78	1.17838	0.238647	1.17838	0.238647	15	14	0.251712		277	158	53
2380.16	4201.4	0.295102	244	191	86	0.829228	0.406976	0.829228	0.406976	15	14	0.425262		224	182	77	0.964901	0.334595	0.964901	0.334595	14	14	0.35189		235	200	95	0.436436	0.662521	0.436436	0.662521	15	14	0.682954		252	183	78	1.17838	0.238647	1.17838	0.238647	15	14	0.251712		276	159	54
2382.09	4198	0.295341	246	189	84	0.916515	0.359397	0.916515	0.359397	15	14	0.376588		225	181	76	1.01085	0.312089	1.01085	0.312089	14	14	0.328667		231	204	99	0.261861	0.793428	0.261861	0.793428	15	14	0.813179		251	184	79	1.13473	0.256488	1.13473	0.256488	15	14	0.270299		276	159	54
2384.02	4194.6	0.29558	246	189	84	0.916515	0.359397	0.916515	0.359397	15	14	0.376588		226	180	75	1.0568	0.290605	1.0568	0.290605	14	14	0.306426		230	205	100	0.218218	0.827259	0.218218	0.827259	15	14	0.846694		251	184	79	1.13473	0.256488	1.13473	0.256488	15	14	0.270299		274	161	56
2385.95	4191.21	0.295819	245	190	85	0.872872	0.382734	0.872872	0.382734	15	14	0.400494		227	179	74	1.10274	0.270139	1.10274	0.270139	14	14	0.285176		229	206	101	0.174574	0.861414	0.174574	0.861414	15	14	0.880478		252	183	78	1.17838	0.238647	1.17838	0.238647	15	14	0.251712		275	160	55
2387.87	4187.83	0.296059	245	190	85	0.872872	0.382734	0.872872	0.382734	15	14	0.400494		227	179	74	1.10274	0.270139	1.10274	0.270139	14	14	0.285176		229	206	101	0.174574	0.861414	0.174574	0.861414	15	14	0.880478		252	183	78	1.17838	0.238647	1.17838	0.238647	15	14	0.251712		274	161	56
2389.8	4184.45	0.296298	245	190	85	0.872872	0.382734	0.872872	0.382734	15	14	0.400494		227	179	74	1.10274	0.270139	1.10274	0.270139	14	14	0.285176		228	207	102	0.130931	0.89583	0.130931	0.89583	15	14	0.914475		252	183	78	1.17838	0.238647	1.17838	0.238647	15	14	0.251712		274	161	56
2391.73	4181.07	0.296537	245	190	85	0.872872	0.382734	0.872872	0.382734	15	14	0.400494		227	179	74	1.10274	0.270139	1.10274	0.270139	14	14	0.285176		228	207	102	0.130931	0.89583	0.130931	0.89583	15	14	0.914475		252	183	78	1.17838	0.238647	1.17838	0.238647	15	14	0.251712		273	162	57
2393.66	4177.7	0.296776	245	190	85	0.872872	0.382734	0.872872	0.382734	15	14	0.400494		226	180	75	1.0568	0.290605	1.0568	0.290605	14	14	0.306426		227	208	103	0.087287	0.930443	0.087287	0.930443	15	14	0.948623		252	183	78	1.17838	0.238647	1.17838	0.238647	15	14	0.251712		273	162	57
2395.59	4174.34	0.297015	245	190	85	0.872872	0.382734	0.872872	0.382734	15	14	0.400494		224	182	77	0.964901	0.334595	0.964901	0.334595	14	14	0.35189		227	208	103	0.087287	0.930443	0.087287	0.930443	15	14	0.948623		252	183	78	1.17838	0.238647	1.17838	0.238647	15	14	0.251712		273	162	57
2397.52	4170.98	0.297254	245	190	85	0.872872	0.382734	0.872872	0.382734	15	14	0.400494		225	181	76	1.01085	0.312089	1.01085	0.312089	14	14	0.328667		227	208	103	0.087287	0.930443	0.087287	0.930443	15	14	0.948623		252	183	78	1.17838	0.238647	1.17838	0.238647	15	14	0.251712		273	162	57
2399.45	4167.63	0.297493	244	191	86	0.829228	0.406976	0.829228	0.406976	15	14	0.425262		225	181	76	1.01085	0.312089	1.01085	0.312089	14	14	0.328667		227	208	103	0.087287	0.930443	0.087287	0.930443	15	14	0.948623		252	183	78	1.17838	0.238647	1.17838	0.238647	15	14	0.251712		273	162	57
2401.38	4164.28	0.297733	244	191	86	0.829228	0.406976	0.829228	0.406976	15	14	0.425262		224	182	77	0.964901	0.334595	0.964901	0.334595	14	14	0.35189		228	207	102	0.130931	0.89583	0.130931	0.89583	15	14	0.914475		252	183	78	1.17838	0.238647	1.17838	0.238647	15	14	0.251712		273	162	57
2403.3	4160.94	0.297972	244	191	86	0.829228	0.406976	0.829228	0.406976	15	14	0.425262		225	181	76	1.01085	0.312089	1.01085	0.312089	14	14	0.328667		227	208	103	0.087287	0.930443	0.087287	0.930443	15	14	0.948623		252	183	78	1.17838	0.238647	1.17838	0.238647	15	14	0.251712		273	162	57
2405.23	4157.6	0.298211	244	191	86	0.829228	0.406976	0.829228	0.406976	15	14	0.425262		225	181	76	1.01085	0.312089	1.01085	0.312089	14	14	0.328667		227	208	103	0.087287	0.930443	0.087287	0.930443	15	14	0.948623		252	183	78	1.17838	0.238647	1.17838	0.238647	15	14	0.251712		273	162	57
2407.16	4154.27	0.29845	245	190	85	0.872872	0.382734	0.872872	0.382734	15	14	0.400494		225	181	76	1.01085	0.312089	1.01085	0.312089	14	14	0.328667		227	208	103	0.087287	0.930443	0.087287	0.930443	15	14	0.948623		252	183	78	1.17838	0.238647	1.17838	0.238647	15	14	0.251712		273	162	57
2409.09	4150.94	0.298689	245	190	85	0.872872	0.382734	0.872872	0.382734	15	14	0.400494		225	181	76	1.01085	0.312089	1.01085	0.312089	14	14	0.328667		227	208	103	0.087287	0.930443	0.087287	0.930443	15	14	0.948623		251	184	79	1.13473	0.256488	1.13473	0.256488	15	14	0.270299		273	162	57
2411.02	4147.62	0.298928	244	191	86	0.829228	0.406976	0.829228	0.406976	15	14	0.425262		223	183	78	0.918954	0.358121	0.918954	0.358121	14	14	0.376095		227	208	103	0.087287	0.930443	0.087287	0.930443	15	14	0.948623		251	184	79	1.13473	0.256488	1.13473	0.256488	15	14	0.270299		273	162	57
2412.95	4144.31	0.299167	244	191	86	0.829228	0.406976	0.829228	0.406976	15	14	0.425262		223	183	78	0.918954	0.358121	0.918954	0.358121	14	14	0.376095		227	208	103	0.087287	0.930443	0.087287	0.930443	15	14	0.948623		251	184	79	1.13473	0.256488	1.13473	0.256488	15	14	0.270299		273	162	57
2414.88	4141	0.299407	244	191	86	0.829228	0.406976	0.829228	0.406976	15	14	0.425262		222	184	79	0.873006	0.382661	0.873006	0.382661	14	14	0.401263		227	208	103	0.087287	0.930443	0.087287	0.930443	15	14	0.948623		250	185	80	1.09109	0.275234	1.09109	0.275234	15	14	0.289776		272	163	58
2416.81	4137.69	0.299646	244	191	86	0.829228	0.406976	0.829228	0.406976	15	14	0.425262		223	183	78	0.918954	0.358121	0.918954	0.358121	14	14	0.376095		227	208	103	0.087287	0.930443	0.087287	0.930443	15	14	0.948623		250	185	80	1.09109	0.275234	1.09109	0.275234	15	14	0.289776		272	163	58
2418.74	4134.39	0.299885	244	191	86	0.829228	0.406976	0.829228	0.406976	15	14	0.425262		223	183	78	0.918954	0.358121	0.918954	0.358121	14	14	0.376095		227	208	103	0.087287	0.930443	0.087287	0.930443	15	14	0.948623		250	185	80	1.09109	0.275234	1.09109	0.275234	15	14	0.289776		273	162	57
2420.66	4131.1	0.300124	244	191	86	0.829228	0.406976	0.829228	0.406976	15	14	0.425262		223	183	78	0.918954	0.358121	0.918954	0.358121	14	14	0.376095		227	208	103	0.087287	0.930443	0.087287	0.930443	15	14	0.948623		250	185	80	1.09109	0.275234	1.09109	0.275234	15	14	0.289776		273	162	57
2422.59	4127.81	0.300363	244	191	86	0.829228	0.406976	0.829228	0.406976	15	14	0.425262		223	183	78	0.918954	0.358121	0.918954	0.358121	14	14	0.376095		227	208	103	0.087287	0.930443	0.087287	0.930443	15	14	0.948623		250	185	80	1.09109	0.275234	1.09109	0.275234	15	14	0.289776		272	163	58
2424.52	4124.52	0.300602	244	191	86	0.829228	0.406976	0.829228	0.406976	15	14	0.425262		223	183	78	0.918954	0.358121	0.918954	0.358121	14	14	0.376095		227	208	103	0.087287	0.930443	0.087287	0.930443	15	14	0.948623		250	185	80	1.09109	0.275234	1.09109	0.275234	15	14	0.289776		272	163	58
2426.45	4121.25	0.300841	244	191	86	0.829228	0.406976	0.829228	0.406976	15	14	0.425262		223	183	78	0.918954	0.358121	0.918954	0.358121	14	14	0.376095		225	210	105	0	1	0	1	15	14	1.01713		250	185	80	1.09109	0.275234	1.09109	0.275234	15	14	0.289776		272	163	58
2428.38	4117.97	0.301081	244	191	86	0.829228	0.406976	0.829228	0.406976	15	14	0.425262		223	183	78	0.918954	0.358121	0.918954	0.358121	14	14	0.376095		225	210	105	0	1	0	1	15	14	1.01713		250	185	80	1.09109	0.275234	1.09109	0.275234	15	14	0.289776		272	163	58
2430.31	4114.7	0.30132	244	191	86	0.829228	0.406976	0.829228	0.406976	15	14	0.425262		223	183	78	0.918954	0.358121	0.918954	0.358121	14	14	0.376095		224	211	104	-0.043644	0.965189	-0.043644	0.965189	15	14	0.982865		250	185	80	1.09109	0.275234	1.09109	0.275234	15	14	0.289776		272	163	58
2432.24	4111.44	0.301559	243	192	87	0.785584	0.432112	0.785584	0.432112	15	14	0.450872		223	183	78	0.918954	0.358121	0.918954	0.358121	14	14	0.376095		224	211	104	-0.043644	0.965189	-0.043644	0.965189	15	14	0.982865		250	185	80	1.09109	0.275234	1.09109	0.275234	15	14	0.289776		272	163	58
2434.17	4108.18	0.301798	243	192	87	0.785584	0.432112	0.785584	0.432112	15	14	0.450872		223	183	78	0.918954	0.358121	0.918954	0.358121	14	14	0.376095		224	211	104	-0.043644	0.965189	-0.043644	0.965189	15	14	0.982865		250	185	80	1.09109	0.275234	1.09109	0.275234	15	14	0.289776		272	163	58
2436.09	4104.93	0.302037	243	192	87	0.785584	0.432112	0.785584	0.432112	15	14	0.450872		223	183	78	0.918954	0.358121	0.918954	0.358121	14	14	0.376095		224	211	104	-0.043644	0.965189	-0.043644	0.965189	15	14	0.982865		250	185	80	1.09109	0.275234	1.09109	0.275234	15	14	0.289776		272	163	58
2438.02	4101.68	0.302276	243	192	87	0.785584	0.432112	0.785584	0.432112	15	14	0.450872		223	183	78	0.918954	0.358121	0.918954	0.358121	14	14	0.376095		224	211	104	-0.043644	0.965189	-0.043644	0.965189	15	14	0.982865		250	185	80	1.09109	0.275234	1.09109	0.275234	15	14	0.289776		272	163	58
2439.95	4098.44	0.302515	243	192	87	0.785584	0.432112	0.785584	0.432112	15	14	0.450872		223	183	78	0.918954	0.358121	0.918954	0.358121	14	14	0.376095		224	211	104	-0.043644	0.965189	-0.043644	0.965189	15	14	0.982865		250	185	80	1.09109	0.275234	1.09109	0.275234	15	14	0.289776		272	163	58
2441.88	4095.2	0.302755	243	192	87	0.785584	0.432112	0.785584	0.432112	15	14	0.450872		223	183	78	0.918954	0.358121	0.918954	0.358121	14	14	0.376095		224	211	104	-0.043644	0.965189	-0.043644	0.965189	15	14	0.982865		249	186	81	1.04745	0.294895	1.04745	0.294895	15	14	0.310143		272	163	58
2443.81	4091.97	0.302994	243	192	87	0.785584	0.432112	0.785584	0.432112	15	14	0.450872		223	183	78	0.918954	0.358121	0.918954	0.358121	14	14	0.376095		224	211	104	-0.043644	0.965189	-0.043644	0.965189	15	14	0.982865		249	186	81	1.04745	0.294895	1.04745	0.294895	15	14	0.310143		272	163	58
2445.74	4088.74	0.303233	243	192	87	0.785584	0.432112	0.785584	0.432112	15	14	0.450872		223	183	78	0.918954	0.358121	0.918954	0.358121	14	14	0.376095		224	211	104	-0.043644	0.965189	-0.043644	0.965189	15	14	0.982865		249	186	81	1.04745	0.294895	1.04745	0.294895	15	14	0.310143		271	164	59
2447.67	4085.52	0.303472	243	192	87	0.785584	0.432112	0.785584	0.432112	15	14	0.450872		223	183	78	0.918954	0.358121	0.918954	0.358121	14	14	0.376095		224	211	104	-0.043644	0.965189	-0.043644	0.965189	15	14	0.982865		248	187	82	1.0038	0.315475	1.0038	0.315475	15	14	0.331405		271	164	59
2449.6	4082.31	0.303711	243	192	87	0.785584	0.432112	0.785584	0.432112	15	14	0.450872		222	184	79	0.873006	0.382661	0.873006	0.382661	14	14	0.401263		224	211	104	-0.043644	0.965189	-0.043644	0.965189	15	14	0.982865		248	187	82	1.0038	0.315475	1.0038	0.315475	15	14	0.331405		270	165	60
2451.53	4079.09	0.30395	243	192	87	0.785584	0.432112	0.785584	0.432112	15	14	0.450872		222	184	79	0.873006	0.382661	0.873006	0.382661	14	14	0.401263		224	211	104	-0.043644	0.965189	-0.043644	0.965189	15	14	0.982865		248	187	82	1.0038	0.315475	1.0038	0.315475	15	14	0.331405		270	165	60
2453.45	4075.89	0.304189	243	192	87	0.785584	0.432112	0.785584	0.432112	15	14	0.450872		223	183	78	0.918954	0.358121	0.918954	0.358121	14	14	0.376095		224	211	104	-0.043644	0.965189	-0.043644	0.965189	15	14	0.982865		248	187	82	1.0038	0.315475	1.0038	0.315475	15	14	0.331405		269	166	61
2455.38	4072.68	0.304429	243	192	87	0.785584	0.432112	0.785584	0.432112	15	14	0.450872		223	183	78	0.918954	0.358121	0.918954	0.358121	14	14	0.376095		224	211	104	-0.043644	0.965189	-0.043644	0.965189	15	14	0.982865		248	187	82	1.0038	0.315475	1.0038	0.315475	15	14	0.331405		269	166	61
2457.31	4069.49	0.304668	243	192	87	0.785584	0.432112	0.785584	0.432112	15	14	0.450872		223	183	78	0.918954	0.358121	0.918954	0.358121	14	14	0.376095		224	211	104	-0.043644	0.965189	-0.043644	0.965189	15	14	0.982865		248	187	82	1.0038	0.315475	1.0038	0.315475	15	14	0.331405		269	166	61
2459.24	4066.3	0.304907	243	192	87	0.785584	0.432112	0.785584	0.432112	15	14	0.450872		223	183	78	0.918954	0.358121	0.918954	0.358121	14	14	0.376095		224	211	104	-0.043644	0.965189	-0.043644	0.965189	15	14	0.982865		248	187	82	1.0038	0.315475	1.0038	0.315475	15	14	0.331405		269	166	61
2461.17	4063.11	0.305146	243	192	87	0.785584	0.432112	0.785584	0.432112	15	14	0.450872		223	183	78	0.918954	0.358121	0.918954	0.358121	14	14	0.376095		224	211	104	-0.043644	0.965189	-0.043644	0.965189	15	14	0.982865		248	187	82	1.0038	0.315475	1.0038	0.315475	15	14	0.331405		269	166	61
2463.1	4059.93	0.305385	243	192	87	0.785584	0.432112	0.785584	0.432112	15	14	0.450872		223	183	78	0.918954	0.358121	0.918954	0.358121	14	14	0.376095		224	211	104	-0.043644	0.965189	-0.043644	0.965189	15	14	0.982865		249	186	81	1.04745	0.294895	1.04745	0.294895	15	14	0.310143		269	166	61
2465.03	4056.75	0.305624	243	192	87	0.785584	0.432112	0.785584	0.432112	15	14	0.450872		223	183	78	0.918954	0.358121	0.918954	0.358121	14	14	0.376095		224	211	104	-0.043644	0.965189	-0.043644	0.965189	15	14	0.982865		249	186	81	1.04745	0.294895	1.04745	0.294895	15	14	0.310143		269	166	61
2466.96	4053.58	0.305863	243	192	87	0.785584	0.432112	0.785584	0.432112	15	14	0.450872		223	183	78	0.918954	0.358121	0.918954	0.358121	14	14	0.376095		224	211	104	-0.043644	0.965189	-0.043644	0.965189	15	14	0.982865		249	186	81	1.04745	0.294895	1.04745	0.294895	15	14	0.310143		269	166	61
2468.88	4050.41	0.306103	243	192	87	0.785584	0.432112	0.785584	0.432112	15	14	0.450872		223	183	78	0.918954	0.358121	0.918954	0.358121	14	14	0.376095		224	211	104	-0.043644	0.965189	-0.043644	0.965189	15	14	0.982865		249	186	81	1.04745	0.294895	1.04745	0.294895	15	14	0.310143		269	166	61
2470.81	4047.25	0.306342	243	192	87	0.785584	0.432112	0.785584	0.432112	15	14	0.450872		223	183	78	0.918954	0.358121	0.918954	0.358121	14	14	0.376095		224	211	104	-0.043644	0.965189	-0.043644	0.965189	15	14	0.982865		249	186	81	1.04745	0.294895	1.04745	0.294895	15	14	0.310143		269	166	61
2472.74	4044.09	0.306581	242	193	88	0.741941	0.458124	0.741941	0.458124	15	14	0.477307		222	184	79	0.873006	0.382661	0.873006	0.382661	14	14	0.401263		223	212	103	-0.087287	0.930443	-0.087287	0.930443	15	14	0.948623		249	186	81	1.04745	0.294895	1.04745	0.294895	15	14	0.310143		269	166	61
2474.67	4040.94	0.30682	242	193	88	0.741941	0.458124	0.741941	0.458124	15	14	0.477307		223	183	78	0.918954	0.358121	0.918954	0.358121	14	14	0.376095		223	212	103	-0.087287	0.930443	-0.087287	0.930443	15	14	0.948623		249	186	81	1.04745	0.294895	1.04745	0.294895	15	14	0.310143		269	166	61
2476.6	4037.79	0.307059	242	193	88	0.741941	0.458124	0.741941	0.458124	15	14	0.477307		223	183	78	0.918954	0.358121	0.918954	0.358121	14	14	0.376095		224	211	104	-0.043644	0.965189	-0.043644	0.965189	15	14	0.982865		249	186	81	1.04745	0.294895	1.04745	0.294895	15	14	0.310143		269	166	61
2478.53	4034.65	0.307298	242	193	88	0.741941	0.458124	0.741941	0.458124	15	14	0.477307		223	183	78	0.918954	0.358121	0.918954	0.358121	14	14	0.376095		224	211	104	-0.043644	0.965189	-0.043644	0.965189	15	14	0.982865		249	186	81	1.04745	0.294895	1.04745	0.294895	15	14	0.310143		269	166	61
2480.46	4031.51	0.307537	242	193	88	0.741941	0.458124	0.741941	0.458124	15	14	0.477307		223	183	78	0.918954	0.358121	0.918954	0.358121	14	14	0.376095		224	211	104	-0.043644	0.965189	-0.043644	0.965189	15	14	0.982865		249	186	81	1.04745	0.294895	1.04745	0.294895	15	14	0.310143		269	166	61
2482.39	4028.38	0.307777	242	193	88	0.741941	0.458124	0.741941	0.458124	15	14	0.477307		223	183	78	0.918954	0.358121	0.918954	0.358121	14	14	0.376095		224	211	104	-0.043644	0.965189	-0.043644	0.965189	15	14	0.982865		249	186	81	1.04745	0.294895	1.04745	0.294895	15	14	0.310143		269	166	61
2484.32	4025.25	0.308016	242	193	88	0.741941	0.458124	0.741941	0.458124	15	14	0.477307		223	183	78	0.918954	0.358121	0.918954	0.358121	14	14	0.376095		223	212	103	-0.087287	0.930443	-0.087287	0.930443	15	14	0.948623		249	186	81	1.04745	0.294895	1.04745	0.294895	15	14	0.310143		269	166	61
2486.24	4022.13	0.308255	242	193	88	0.741941	0.458124	0.741941	0.458124	15	14	0.477307		223	183	78	0.918954	0.358121	0.918954	0.358121	14	14	0.376095		223	212	103	-0.087287	0.930443	-0.087287	0.930443	15	14	0.948623		249	186	81	1.04745	0.294895	1.04745	0.294895	15	14	0.310143		270	165	60
2488.17	4019.01	0.308494	242	193	88	0.741941	0.458124	0.741941	0.458124	15	14	0.477307		223	183	78	0.918954	0.358121	0.918954	0.358121	14	14	0.376095		224	211	104	-0.043644	0.965189	-0.043644	0.965189	15	14	0.982865		249	186	81	1.04745	0.294895	1.04745	0.294895	15	14	0.310143		270	165	60
2490.1	4015.9	0.308733	242	193	88	0.741941	0.458124	0.741941	0.458124	15	14	0.477307		223	183	78	0.918954	0.358121	0.918954	0.358121	14	14	0.376095		224	211	104	-0.043644	0.965189	-0.043644	0.965189	15	14	0.982865		249	186	81	1.04745	0.294895	1.04745	0.294895	15	14	0.310143		270	165	60
2492.03	4012.79	0.308972	242	193	88	0.741941	0.458124	0.741941	0.458124	15	14	0.477307		223	183	78	0.918954	0.358121	0.918954	0.358121	14	14	0.376095		224	211	104	-0.043644	0.965189	-0.043644	0.965189	15	14	0.982865		249	186	81	1.04745	0.294895	1.04745	0.294895	15	14	0.310143		269	166	61
2493.96	4009.69	0.309211	242	193	88	0.741941	0.458124	0.741941	0.458124	15	14	0.477307		223	183	78	0.918954	0.358121	0.918954	0.358121	14	14	0.376095		224	211	104	-0.043644	0.965189	-0.043644	0.965189	15	14	0.982865		249	186	81	1.04745	0.294895	1.04745	0.294895	15	14	0.310143		268	167	62
2495.89	4006.59	0.309451	242	193	88	0.741941	0.458124	0.741941	0.458124	15	14	0.477307		222	184	79	0.873006	0.382661	0.873006	0.382661	14	14	0.401263		223	212	103	-0.087287	0.930443	-0.087287	0.930443	15	14	0.948623		249	186	81	1.04745	0.294895	1.04745	0.294895	15	14	0.310143		269	166	61
2497.82	4003.5	0.30969	242	193	88	0.741941	0.458124	0.741941	0.458124	15	14	0.477307		222	184	79	0.873006	0.382661	0.873006	0.382661	14	14	0.401263		222	213	102	-0.130931	0.89583	-0.130931	0.89583	15	14	0.914475		249	186	81	1.04745	0.294895	1.04745	0.294895	15	14	0.310143		269	166	61
2499.75	4000.41	0.309929	242	193	88	0.741941	0.458124	0.741941	0.458124	15	14	0.477307		222	184	79	0.873006	0.382661	0.873006	0.382661	14	14	0.401263		221	214	101	-0.174574	0.861414	-0.174574	0.861414	15	14	0.880478		249	186	81	1.04745	0.294895	1.04745	0.294895	15	14	0.310143		269	166	61
2501.67	3997.32	0.310168	242	193	88	0.741941	0.458124	0.741941	0.458124	15	14	0.477307		222	184	79	0.873006	0.382661	0.873006	0.382661	14	14	0.401263		222	213	102	-0.130931	0.89583	-0.130931	0.89583	15	14	0.914475		248	187	82	1.0038	0.315475	1.0038	0.315475	15	14	0.331405		269	166	61
2503.6	3994.24	0.310407	242	193	88	0.741941	0.458124	0.741941	0.458124	15	14	0.477307		222	184	79	0.873006	0.382661	0.873006	0.382661	14	14	0.401263		221	214	101	-0.174574	0.861414	-0.174574	0.861414	15	14	0.880478		247	188	83	0.960159	0.336976	0.960159	0.336976	15	14	0.353554		269	166	61
2505.53	3991.17	0.310646	242	193	88	0.741941	0.458124	0.741941	0.458124	15	14	0.477307		222	184	79	0.873006	0.382661	0.873006	0.382661	14	14	0.401263		221	214	101	-0.174574	0.861414	-0.174574	0.861414	15	14	0.880478		247	188	83	0.960159	0.336976	0.960159	0.336976	15	14	0.353554		269	166	61
2507.46	3988.1	0.310885	241	194	89	0.698297	0.484992	0.698297	0.484992	15	14	0.504539		222	184	79	0.873006	0.382661	0.873006	0.382661	14	14	0.401263		222	213	102	-0.130931	0.89583	-0.130931	0.89583	15	14	0.914475		246	189	84	0.916515	0.359397	0.916515	0.359397	15	14	0.376588		269	166	61
2509.39	3985.03	0.311125	241	194	89	0.698297	0.484992	0.698297	0.484992	15	14	0.504539		222	184	79	0.873006	0.382661	0.873006	0.382661	14	14	0.401263		222	213	102	-0.130931	0.89583	-0.130931	0.89583	15	14	0.914475		246	189	84	0.916515	0.359397	0.916515	0.359397	15	14	0.376588		269	166	61
2511.32	3981.97	0.311364	240	195	90	0.654654	0.512691	0.654654	0.512691	15	14	0.532545		222	184	79	0.873006	0.382661	0.873006	0.382661	14	14	0.401263		222	213	102	-0.130931	0.89583	-0.130931	0.89583	15	14	0.914475		246	189	84	0.916515	0.359397	0.916515	0.359397	15	14	0.376588		269	166	61
2513.25	3978.92	0.311603	240	195	90	0.654654	0.512691	0.654654	0.512691	15	14	0.532545		222	184	79	0.873006	0.382661	0.873006	0.382661	14	14	0.401263		222	213	102	-0.130931	0.89583	-0.130931	0.89583	15	14	0.914475		247	188	83	0.960159	0.336976	0.960159	0.336976	15	14	0.353554		269	166	61
2515.18	3975.86	0.311842	240	195	90	0.654654	0.512691	0.654654	0.512691	15	14	0.532545		222	184	79	0.873006	0.382661	0.873006	0.382661	14	14	0.401263		222	213	102	-0.130931	0.89583	-0.130931	0.89583	15	14	0.914475		247	188	83	0.960159	0.336976	0.960159	0.336976	15	14	0.353554		269	166	61
2517.1	3972.82	0.312081	240	195	90	0.654654	0.512691	0.654654	0.512691	15	14	0.532545		222	184	79	0.873006	0.382661	0.873006	0.382661	14	14	0.401263		222	213	102	-0.130931	0.89583	-0.130931	0.89583	15	14	0.914475		247	188	83	0.960159	0.336976	0.960159	0.336976	15	14	0.353554		268	167	62
2519.03	3969.78	0.31232	240	195	90	0.654654	0.512691	0.654654	0.512691	15	14	0.532545		221	185	80	0.827058	0.408205	0.827058	0.408205	14	14	0.427387		222	213	102	-0.130931	0.89583	-0.130931	0.89583	15	14	0.914475		246	189	84	0.916515	0.359397	0.916515	0.359397	15	14	0.376588		270	165	60
2520.96	3966.74	0.312559	240	195	90	0.654654	0.512691	0.654654	0.512691	15	14	0.532545		221	185	80	0.827058	0.408205	0.827058	0.408205	14	14	0.427387		223	212	103	-0.087287	0.930443	-0.087287	0.930443	15	14	0.948623		245	190	85	0.872872	0.382734	0.872872	0.382734	15	14	0.400494		269	166	61
2522.89	3963.71	0.312799	240	195	90	0.654654	0.512691	0.654654	0.512691	15	14	0.532545		222	184	79	0.873006	0.382661	0.873006	0.382661	14	14	0.401263		223	212	103	-0.087287	0.930443	-0.087287	0.930443	15	14	0.948623		245	190	85	0.872872	0.382734	0.872872	0.382734	15	14	0.400494		269	166	61
2524.82	3960.68	0.313038	240	195	90	0.654654	0.512691	0.654654	0.512691	15	14	0.532545		221	185	80	0.827058	0.408205	0.827058	0.408205	14	14	0.427387		223	212	103	-0.087287	0.930443	-0.087287	0.930443	15	14	0.948623		245	190	85	0.872872	0.382734	0.872872	0.382734	15	14	0.400494		269	166	61
2526.75	3957.65	0.313277	240	195	90	0.654654	0.512691	0.654654	0.512691	15	14	0.532545		220	186	81	0.781111	0.434738	0.781111	0.434738	14	14	0.454438		222	213	102	-0.130931	0.89583	-0.130931	0.89583	15	14	0.914475		245	190	85	0.872872	0.382734	0.872872	0.382734	15	14	0.400494		269	166	61
2528.68	3954.64	0.313516	240	195	90	0.654654	0.512691	0.654654	0.512691	15	14	0.532545		220	186	81	0.781111	0.434738	0.781111	0.434738	14	14	0.454438		221	214	101	-0.174574	0.861414	-0.174574	0.861414	15	14	0.880478		245	190	85	0.872872	0.382734	0.872872	0.382734	15	14	0.400494		267	168	63
2530.61	3951.62	0.313755	240	195	90	0.654654	0.512691	0.654654	0.512691	15	14	0.532545		220	186	81	0.781111	0.434738	0.781111	0.434738	14	14	0.454438		221	214	101	-0.174574	0.861414	-0.174574	0.861414	15	14	0.880478		245	190	85	0.872872	0.382734	0.872872	0.382734	15	14	0.400494		268	167	62
2532.54	3948.61	0.313994	240	195	90	0.654654	0.512691	0.654654	0.512691	15	14	0.532545		220	186	81	0.781111	0.434738	0.781111	0.434738	14	14	0.454438		221	214	101	-0.174574	0.861414	-0.174574	0.861414	15	14	0.880478		245	190	85	0.872872	0.382734	0.872872	0.382734	15	14	0.400494		269	166	61
2534.46	3945.61	0.314233	240	195	90	0.654654	0.512691	0.654654	0.512691	15	14	0.532545		220	186	81	0.781111	0.434738	0.781111	0.434738	14	14	0.454438		221	214	101	-0.174574	0.861414	-0.174574	0.861414	15	14	0.880478		245	190	85	0.872872	0.382734	0.872872	0.382734	15	14	0.400494		268	167	62
2536.39	3942.61	0.314473	240	195	90	0.654654	0.512691	0.654654	0.512691	15	14	0.532545		220	186	81	0.781111	0.434738	0.781111	0.434738	14	14	0.454438		221	214	101	-0.174574	0.861414	-0.174574	0.861414	15	14	0.880478		244	191	86	0.829228	0.406976	0.829228	0.406976	15	14	0.425262		269	166	61
2538.32	3939.61	0.314712	240	195	90	0.654654	0.512691	0.654654	0.512691	15	14	0.532545		220	186	81	0.781111	0.434738	0.781111	0.434738	14	14	0.454438		221	214	101	-0.174574	0.861414	-0.174574	0.861414	15	14	0.880478		244	191	86	0.829228	0.406976	0.829228	0.406976	15	14	0.425262		269	166	61
2540.25	3936.62	0.314951	239	196	91	0.61101	0.541193	0.61101	0.541193	15	14	0.561291		220	186	81	0.781111	0.434738	0.781111	0.434738	14	14	0.454438		221	214	101	-0.174574	0.861414	-0.174574	0.861414	15	14	0.880478		244	191	86	0.829228	0.406976	0.829228	0.406976	15	14	0.425262		269	166	61
2542.18	3933.63	0.31519	240	195	90	0.654654	0.512691	0.654654	0.512691	15	14	0.532545		221	185	80	0.827058	0.408205	0.827058	0.408205	14	14	0.427387		221	214	101	-0.174574	0.861414	-0.174574	0.861414	15	14	0.880478		245	190	85	0.872872	0.382734	0.872872	0.382734	15	14	0.400494		269	166	61
2544.11	3930.65	0.315429	239	196	91	0.61101	0.541193	0.61101	0.541193	15	14	0.561291		221	185	80	0.827058	0.408205	0.827058	0.408205	14	14	0.427387		221	214	101	-0.174574	0.861414	-0.174574	0.861414	15	14	0.880478		244	191	86	0.829228	0.406976	0.829228	0.406976	15	14	0.425262		269	166	61
2546.04	3927.67	0.315668	239	196	91	0.61101	0.541193	0.61101	0.541193	15	14	0.561291		221	185	80	0.827058	0.408205	0.827058	0.408205	14	14	0.427387		221	214	101	-0.174574	0.861414	-0.174574	0.861414	15	14	0.880478		244	191	86	0.829228	0.406976	0.829228	0.406976	15	14	0.425262		269	166	61
2547.97	3924.7	0.315907	239	196	91	0.61101	0.541193	0.61101	0.541193	15	14	0.561291		221	185	80	0.827058	0.408205	0.827058	0.408205	14	14	0.427387		222	213	102	-0.130931	0.89583	-0.130931	0.89583	15	14	0.914475		244	191	86	0.829228	0.406976	0.829228	0.406976	15	14	0.425262		269	166	61
2549.89	3921.73	0.316147	239	196	91	0.61101	0.541193	0.61101	0.541193	15	14	0.561291		221	185	80	0.827058	0.408205	0.827058	0.408205	14	14	0.427387		221	214	101	-0.174574	0.861414	-0.174574	0.861414	15	14	0.880478		244	191	86	0.829228	0.406976	0.829228	0.406976	15	14	0.425262		269	166	61
2551.82	3918.77	0.316386	239	196	91	0.61101	0.541193	0.61101	0.541193	15	14	0.561291		221	185	80	0.827058	0.408205	0.827058	0.408205	14	14	0.427387		221	214	101	-0.174574	0.861414	-0.174574	0.861414	15	14	0.880478		245	190	85	0.872872	0.382734	0.872872	0.382734	15	14	0.400494		269	166	61
2553.75	3915.81	0.316625	239	196	91	0.61101	0.541193	0.61101	0.541193	15	14	0.561291		221	185	80	0.827058	0.408205	0.827058	0.408205	14	14	0.427387		221	214	101	-0.174574	0.861414	-0.174574	0.861414	15	14	0.880478		245	190	85	0.872872	0.382734	0.872872	0.382734	15	14	0.400494		270	165	60
2555.68	3912.85	0.316864	239	196	91	0.61101	0.541193	0.61101	0.541193	15	14	0.561291		221	185	80	0.827058	0.408205	0.827058	0.408205	14	14	0.427387		220	215	100	-0.218218	0.827259	-0.218218	0.827259	15	14	0.846694		245	190	85	0.872872	0.382734	0.872872	0.382734	15	14	0.400494		269	166	61
2557.61	3909.9	0.317103	239	196	91	0.61101	0.541193	0.61101	0.541193	15	14	0.561291		221	185	80	0.827058	0.408205	0.827058	0.408205	14	14	0.427387		220	215	100	-0.218218	0.827259	-0.218218	0.827259	15	14	0.846694		245	190	85	0.872872	0.382734	0.872872	0.382734	15	14	0.400494		269	166	61
2559.54	3906.95	0.317342	239	196	91	0.61101	0.541193	0.61101	0.541193	15	14	0.561291		221	185	80	0.827058	0.408205	0.827058	0.408205	14	14	0.427387		222	213	102	-0.130931	0.89583	-0.130931	0.89583	15	14	0.914475		245	190	85	0.872872	0.382734	0.872872	0.382734	15	14	0.400494		269	166	61
2561.47	3904.01	0.317581	239	196	91	0.61101	0.541193	0.61101	0.541193	15	14	0.561291		220	186	81	0.781111	0.434738	0.781111	0.434738	14	14	0.454438		221	214	101	-0.174574	0.861414	-0.174574	0.861414	15	14	0.880478		245	190	85	0.872872	0.382734	0.872872	0.382734	15	14	0.400494		269	166	61
2563.4	3901.07	0.317821	239	196	91	0.61101	0.541193	0.61101	0.541193	15	14	0.561291		220	186	81	0.781111	0.434738	0.781111	0.434738	14	14	0.454438		221	214	101	-0.174574	0.861414	-0.174574	0.861414	15	14	0.880478		245	190	85	0.872872	0.382734	0.872872	0.382734	15	14	0.400494		269	166	61
2565.33	3898.14	0.31806	239	196	91	0.61101	0.541193	0.61101	0.541193	15	14	0.561291		220	186	81	0.781111	0.434738	0.781111	0.434738	14	14	0.454438		221	214	101	-0.174574	0.861414	-0.174574	0.861414	15	14	0.880478		245	190	85	0.872872	0.382734	0.872872	0.382734	15	14	0.400494		268	167	62
2567.25	3895.21	0.318299	239	196	91	0.61101	0.541193	0.61101	0.541193	15	14	0.561291		220	186	81	0.781111	0.434738	0.781111	0.434738	14	14	0.454438		221	214	101	-0.174574	0.861414	-0.174574	0.861414	15	14	0.880478		245	190	85	0.872872	0.382734	0.872872	0.382734	15	14	0.400494		269	166	61
2569.18	3892.29	0.318538	239	196	91	0.61101	0.541193	0.61101	0.541193	15	14	0.561291		220	186	81	0.781111	0.434738	0.781111	0.434738	14	14	0.454438		220	215	100	-0.218218	0.827259	-0.218218	0.827259	15	14	0.846694		245	190	85	0.872872	0.382734	0.872872	0.382734	15	14	0.400494		270	165	60
2571.11	3889.37	0.318777	239	196	91	0.61101	0.541193	0.61101	0.541193	15	14	0.561291		220	186	81	0.781111	0.434738	0.781111	0.434738	14	14	0.454438		221	214	101	-0.174574	0.861414	-0.174574	0.861414	15	14	0.880478		245	190	85	0.872872	0.382734	0.872872	0.382734	15	14	0.400494		269	166	61
2573.04	3886.45	0.319016	239	196	91	0.61101	0.541193	0.61101	0.541193	15	14	0.561291		220	186	81	0.781111	0.434738	0.781111	0.434738	14	14	0.454438		221	214	101	-0.174574	0.861414	-0.174574	0.861414	15	14	0.880478		245	190	85	0.872872	0.382734	0.872872	0.382734	15	14	0.400494		269	166	61
2574.97	3883.54	0.319255	239	196	91	0.61101	0.541193	0.61101	0.541193	15	14	0.561291		220	186	81	0.781111	0.434738	0.781111	0.434738	14	14	0.454438		221	214	101	-0.174574	0.861414	-0.174574	0.861414	15	14	0.880478		245	190	85	0.872872	0.382734	0.872872	0.382734	15	14	0.400494		269	166	61
2576.9	3880.63	0.319495	239	196	91	0.61101	0.541193	0.61101	0.541193	15	14	0.561291		219	187	82	0.735163	0.462241	0.735163	0.462241	14	14	0.482401		221	214	101	-0.174574	0.861414	-0.174574	0.861414	15	14	0.880478		245	190	85	0.872872	0.382734	0.872872	0.382734	15	14	0.400494		268	167	62
2578.83	3877.73	0.319734	239	196	91	0.61101	0.541193	0.61101	0.541193	15	14	0.561291		219	187	82	0.735163	0.462241	0.735163	0.462241	14	14	0.482401		221	214	101	-0.174574	0.861414	-0.174574	0.861414	15	14	0.880478		245	190	85	0.872872	0.382734	0.872872	0.382734	15	14	0.400494		267	168	63
2580.76	3874.83	0.319973	239	196	91	0.61101	0.541193	0.61101	0.541193	15	14	0.561291		219	187	82	0.735163	0.462241	0.735163	0.462241	14	14	0.482401		221	214	101	-0.174574	0.861414	-0.174574	0.861414	15	14	0.880478		245	190	85	0.872872	0.382734	0.872872	0.382734	15	14	0.400494		268	167	62
2582.68	3871.94	0.320212	239	196	91	0.61101	0.541193	0.61101	0.541193	15	14	0.561291		219	187	82	0.735163	0.462241	0.735163	0.462241	14	14	0.482401		220	215	100	-0.218218	0.827259	-0.218218	0.827259	15	14	0.846694		245	190	85	0.872872	0.382734	0.872872	0.382734	15	14	0.400494		268	167	62
2584.61	3869.05	0.320451	239	196	91	0.61101	0.541193	0.61101	0.541193	15	14	0.561291		219	187	82	0.735163	0.462241	0.735163	0.462241	14	14	0.482401		219	216	99	-0.261861	0.793428	-0.261861	0.793428	15	14	0.813179		245	190	85	0.872872	0.382734	0.872872	0.382734	15	14	0.400494		268	167	62
2586.54	3866.17	0.32069	239	196	91	0.61101	0.541193	0.61101	0.541193	15	14	0.561291		219	187	82	0.735163	0.462241	0.735163	0.462241	14	14	0.482401		219	216	99	-0.261861	0.793428	-0.261861	0.793428	15	14	0.813179		245	190	85	0.872872	0.382734	0.872872	0.382734	15	14	0.400494		269	166	61
2588.47	3863.28	0.320929	239	196	91	0.61101	0.541193	0.61101	0.541193	15	14	0.561291		219	187	82	0.735163	0.462241	0.735163	0.462241	14	14	0.482401		219	216	99	-0.261861	0.793428	-0.261861	0.793428	15	14	0.813179		245	190	85	0.872872	0.382734	0.872872	0.382734	15	14	0.400494		270	165	60
2590.4	3860.41	0.321169	239	196	91	0.61101	0.541193	0.61101	0.541193	15	14	0.561291		219	187	82	0.735163	0.462241	0.735163	0.462241	14	14	0.482401		219	216	99	-0.261861	0.793428	-0.261861	0.793428	15	14	0.813179		245	190	85	0.872872	0.382734	0.872872	0.382734	15	14	0.400494		268	167	62
2592.33	3857.54	0.321408	239	196	91	0.61101	0.541193	0.61101	0.541193	15	14	0.561291		219	187	82	0.735163	0.462241	0.735163	0.462241	14	14	0.482401		219	216	99	-0.261861	0.793428	-0.261861	0.793428	15	14	0.813179		245	190	85	0.872872	0.382734	0.872872	0.382734	15	14	0.400494		269	166	61
2594.26	3854.67	0.321647	239	196	91	0.61101	0.541193	0.61101	0.541193	15	14	0.561291		219	187	82	0.735163	0.462241	0.735163	0.462241	14	14	0.482401		220	215	100	-0.218218	0.827259	-0.218218	0.827259	15	14	0.846694		245	190	85	0.872872	0.382734	0.872872	0.382734	15	14	0.400494		269	166	61
2596.19	3851.8	0.321886	239	196	91	0.61101	0.541193	0.61101	0.541193	15	14	0.561291		219	187	82	0.735163	0.462241	0.735163	0.462241	14	14	0.482401		220	215	100	-0.218218	0.827259	-0.218218	0.827259	15	14	0.846694		244	191	86	0.829228	0.406976	0.829228	0.406976	15	14	0.425262		269	166	61
2598.12	3848.94	0.322125	239	196	91	0.61101	0.541193	0.61101	0.541193	15	14	0.561291		219	187	82	0.735163	0.462241	0.735163	0.462241	14	14	0.482401		219	216	99	-0.261861	0.793428	-0.261861	0.793428	15	14	0.813179		244	191	86	0.829228	0.406976	0.829228	0.406976	15	14	0.425262		270	165	60
2600.04	3846.09	0.322364	239	196	91	0.61101	0.541193	0.61101	0.541193	15	14	0.561291		219	187	82	0.735163	0.462241	0.735163	0.462241	14	14	0.482401		219	216	99	-0.261861	0.793428	-0.261861	0.793428	15	14	0.813179		244	191	86	0.829228	0.406976	0.829228	0.406976	15	14	0.425262		269	166	61
2601.97	3843.24	0.322603	238	197	92	0.567367	0.570466	0.567367	0.570466	15	14	0.590745		218	188	83	0.689215	0.490688	0.689215	0.490688	14	14	0.511239		219	216	99	-0.261861	0.793428	-0.261861	0.793428	15	14	0.813179		244	191	86	0.829228	0.406976	0.829228	0.406976	15	14	0.425262		269	166	61
2603.9	3840.39	0.322843	238	197	92	0.567367	0.570466	0.567367	0.570466	15	14	0.590745		219	187	82	0.735163	0.462241	0.735163	0.462241	14	14	0.482401		219	216	99	-0.261861	0.793428	-0.261861	0.793428	15	14	0.813179		244	191	86	0.829228	0.406976	0.829228	0.406976	15	14	0.425262		270	165	60
2605.83	3837.55	0.323082	238	197	92	0.567367	0.570466	0.567367	0.570466	15	14	0.590745		219	187	82	0.735163	0.462241	0.735163	0.462241	14	14	0.482401		219	216	99	-0.261861	0.793428	-0.261861	0.793428	15	14	0.813179		244	191	86	0.829228	0.406976	0.829228	0.406976	15	14	0.425262		270	165	60
2607.76	3834.71	0.323321	238	197	92	0.567367	0.570466	0.567367	0.570466	15	14	0.590745		219	187	82	0.735163	0.462241	0.735163	0.462241	14	14	0.482401		219	216	99	-0.261861	0.793428	-0.261861	0.793428	15	14	0.813179		244	191	86	0.829228	0.406976	0.829228	0.406976	15	14	0.425262		270	165	60
2609.69	3831.88	0.32356	238	197	92	0.567367	0.570466	0.567367	0.570466	15	14	0.590745		219	187	82	0.735163	0.462241	0.735163	0.462241	14	14	0.482401		219	216	99	-0.261861	0.793428	-0.261861	0.793428	15	14	0.813179		244	191	86	0.829228	0.406976	0.829228	0.406976	15	14	0.425262		270	165	60
2611.62	3829.05	0.323799	238	197	92	0.567367	0.570466	0.567367	0.570466	15	14	0.590745		219	187	82	0.735163	0.462241	0.735163	0.462241	14	14	0.482401		219	216	99	-0.261861	0.793428	-0.261861	0.793428	15	14	0.813179		245	190	85	0.872872	0.382734	0.872872	0.382734	15	14	0.400494		270	165	60
2613.55	3826.22	0.324038	238	197	92	0.567367	0.570466	0.567367	0.570466	15	14	0.590745		219	187	82	0.735163	0.462241	0.735163	0.462241	14	14	0.482401		219	216	99	-0.261861	0.793428	-0.261861	0.793428	15	14	0.813179		245	190	85	0.872872	0.382734	0.872872	0.382734	15	14	0.400494		269	166	61
2615.47	3823.4	0.324277	238	197	92	0.567367	0.570466	0.567367	0.570466	15	14	0.590745		220	186	81	0.781111	0.434738	0.781111	0.434738	14	14	0.454438		220	215	100	-0.218218	0.827259	-0.218218	0.827259	15	14	0.846694		245	190	85	0.872872	0.382734	0.872872	0.382734	15	14	0.400494		269	166	61
2617.4	3820.58	0.324517	238	197	92	0.567367	0.570466	0.567367	0.570466	15	14	0.590745		220	186	81	0.781111	0.434738	0.781111	0.434738	14	14	0.454438		220	215	100	-0.218218	0.827259	-0.218218	0.827259	15	14	0.846694		245	190	85	0.872872	0.382734	0.872872	0.382734	15	14	0.400494		270	165	60
2619.33	3817.77	0.324756	238	197	92	0.567367	0.570466	0.567367	0.570466	15	14	0.590745		220	186	81	0.781111	0.434738	0.781111	0.434738	14	14	0.454438		220	215	100	-0.218218	0.827259	-0.218218	0.827259	15	14	0.846694		245	190	85	0.872872	0.382734	0.872872	0.382734	15	14	0.400494		269	166	61
2621.26	3814.96	0.324995	238	197	92	0.567367	0.570466	0.567367	0.570466	15	14	0.590745		220	186	81	0.781111	0.434738	0.781111	0.434738	14	14	0.454438		220	215	100	-0.218218	0.827259	-0.218218	0.827259	15	14	0.846694		245	190	85	0.872872	0.382734	0.872872	0.382734	15	14	0.400494		269	166	61
2623.19	3812.15	0.325234	238	197	92	0.567367	0.570466	0.567367	0.570466	15	14	0.590745		220	186	81	0.781111	0.434738	0.781111	0.434738	14	14	0.454438		220	215	100	-0.218218	0.827259	-0.218218	0.827259	15	14	0.846694		245	190	85	0.872872	0.382734	0.872872	0.382734	15	14	0.400494		270	165	60
2625.12	3809.35	0.325473	238	197	92	0.567367	0.570466	0.567367	0.570466	15	14	0.590745		220	186	81	0.781111	0.434738	0.781111	0.434738	14	14	0.454438		219	216	99	-0.261861	0.793428	-0.261861	0.793428	15	14	0.813179		245	190	85	0.872872	0.382734	0.872872	0.382734	15	14	0.400494		270	165	60
2627.05	3806.55	0.325712	238	197	92	0.567367	0.570466	0.567367	0.570466	15	14	0.590745		219	187	82	0.735163	0.462241	0.735163	0.462241	14	14	0.482401		219	216	99	-0.261861	0.793428	-0.261861	0.793428	15	14	0.813179		245	190	85	0.872872	0.382734	0.872872	0.382734	15	14	0.400494		268	167	62
2628.98	3803.76	0.325951	238	197	92	0.567367	0.570466	0.567367	0.570466	15	14	0.590745		220	186	81	0.781111	0.434738	0.781111	0.434738	14	14	0.454438		220	215	100	-0.218218	0.827259	-0.218218	0.827259	15	14	0.846694		245	190	85	0.872872	0.382734	0.872872	0.382734	15	14	0.400494		267	168	63
2630.91	3800.97	0.326191	238	197	92	0.567367	0.570466	0.567367	0.570466	15	14	0.590745		220	186	81	0.781111	0.434738	0.781111	0.434738	14	14	0.454438		219	216	99	-0.261861	0.793428	-0.261861	0.793428	15	14	0.813179		245	190	85	0.872872	0.382734	0.872872	0.382734	15	14	0.400494		267	168	63
2632.83	3798.19	0.32643	237	198	93	0.523723	0.600472	0.523723	0.600472	15	14	0.620867		221	185	80	0.827058	0.408205	0.827058	0.408205	14	14	0.427387		219	216	99	-0.261861	0.793428	-0.261861	0.793428	15	14	0.813179		245	190	85	0.872872	0.382734	0.872872	0.382734	15	14	0.400494		267	168	63
2634.76	3795.41	0.326669	237	198	93	0.523723	0.600472	0.523723	0.600472	15	14	0.620867		221	185	80	0.827058	0.408205	0.827058	0.408205	14	14	0.427387		219	216	99	-0.261861	0.793428	-0.261861	0.793428	15	14	0.813179		245	190	85	0.872872	0.382734	0.872872	0.382734	15	14	0.400494		267	168	63
2636.69	3792.63	0.326908	237	198	93	0.523723	0.600472	0.523723	0.600472	15	14	0.620867		221	185	80	0.827058	0.408205	0.827058	0.408205	14	14	0.427387		219	216	99	-0.261861	0.793428	-0.261861	0.793428	15	14	0.813179		245	190	85	0.872872	0.382734	0.872872	0.382734	15	14	0.400494		267	168	63
2638.62	3789.86	0.327147	236	199	94	0.480079	0.631171	0.480079	0.631171	15	14	0.651619		220	186	81	0.781111	0.434738	0.781111	0.434738	14	14	0.454438		219	216	99	-0.261861	0.793428	-0.261861	0.793428	15	14	0.813179		245	190	85	0.872872	0.382734	0.872872	0.382734	15	14	0.400494		268	167	62
2640.55	3787.09	0.327386	237	198	93	0.523723	0.600472	0.523723	0.600472	15	14	0.620867		220	186	81	0.781111	0.434738	0.781111	0.434738	14	14	0.454438		219	216	99	-0.261861	0.793428	-0.261861	0.793428	15	14	0.813179		245	190	85	0.872872	0.382734	0.872872	0.382734	15	14	0.400494		269	166	61
2642.48	3784.33	0.327625	236	199	94	0.480079	0.631171	0.480079	0.631171	15	14	0.651619		220	186	81	0.781111	0.434738	0.781111	0.434738	14	14	0.454438		219	216	99	-0.261861	0.793428	-0.261861	0.793428	15	14	0.813179		245	190	85	0.872872	0.382734	0.872872	0.382734	15	14	0.400494		269	166	61
2644.41	3781.57	0.327865	237	198	93	0.523723	0.600472	0.523723	0.600472	15	14	0.620867		220	186	81	0.781111	0.434738	0.781111	0.434738	14	14	0.454438		220	215	100	-0.218218	0.827259	-0.218218	0.827259	15	14	0.846694		245	190	85	0.872872	0.382734	0.872872	0.382734	15	14	0.400494		269	166	61
2646.34	3778.81	0.328104	237	198	93	0.523723	0.600472	0.523723	0.600472	15	14	0.620867		221	185	80	0.827058	0.408205	0.827058	0.408205	14	14	0.427387		219	216	99	-0.261861	0.793428	-0.261861	0.793428	15	14	0.813179		245	190	85	0.872872	0.382734	0.872872	0.382734	15	14	0.400494		268	167	62
2648.26	3776.06	0.328343	237	198	93	0.523723	0.600472	0.523723	0.600472	15	14	0.620867		221	185	80	0.827058	0.408205	0.827058	0.408205	14	14	0.427387		220	215	100	-0.218218	0.827259	-0.218218	0.827259	15	14	0.846694		245	190	85	0.872872	0.382734	0.872872	0.382734	15	14	0.400494		269	166	61
2650.19	3773.31	0.328582	237	198	93	0.523723	0.600472	0.523723	0.600472	15	14	0.620867		221	185	80	0.827058	0.408205	0.827058	0.408205	14	14	0.427387		220	215	100	-0.218218	0.827259	-0.218218	0.827259	15	14	0.846694		245	190	85	0.872872	0.382734	0.872872	0.382734	15	14	0.400494		269	166	61
2652.12	3770.57	0.328821	237	198	93	0.523723	0.600472	0.523723	0.600472	15	14	0.620867		221	185	80	0.827058	0.408205	0.827058	0.408205	14	14	0.427387		221	214	101	-0.174574	0.861414	-0.174574	0.861414	15	14	0.880478		245	190	85	0.872872	0.382734	0.872872	0.382734	15	14	0.400494		269	166	61
2654.05	3767.83	0.32906	236	199	94	0.480079	0.631171	0.480079	0.631171	15	14	0.651619		221	185	80	0.827058	0.408205	0.827058	0.408205	14	14	0.427387		221	214	101	-0.174574	0.861414	-0.174574	0.861414	15	14	0.880478		245	190	85	0.872872	0.382734	0.872872	0.382734	15	14	0.400494		269	166	61
2655.98	3765.09	0.329299	236	199	94	0.480079	0.631171	0.480079	0.631171	15	14	0.651619		221	185	80	0.827058	0.408205	0.827058	0.408205	14	14	0.427387		221	214	101	-0.174574	0.861414	-0.174574	0.861414	15	14	0.880478		246	189	84	0.916515	0.359397	0.916515	0.359397	15	14	0.376588		269	166	61
2657.91	3762.36	0.329539	236	199	94	0.480079	0.631171	0.480079	0.631171	15	14	0.651619		222	184	79	0.873006	0.382661	0.873006	0.382661	14	14	0.401263		221	214	101	-0.174574	0.861414	-0.174574	0.861414	15	14	0.880478		246	189	84	0.916515	0.359397	0.916515	0.359397	15	14	0.376588		270	165	60
2659.84	3759.63	0.329778	236	199	94	0.480079	0.631171	0.480079	0.631171	15	14	0.651619		222	184	79	0.873006	0.382661	0.873006	0.382661	14	14	0.401263		221	214	101	-0.174574	0.861414	-0.174574	0.861414	15	14	0.880478		246	189	84	0.916515	0.359397	0.916515	0.359397	15	14	0.376588		270	165	60
2661.77	3756.9	0.330017	236	199	94	0.480079	0.631171	0.480079	0.631171	15	14	0.651619		222	184	79	0.873006	0.382661	0.873006	0.382661	14	14	0.401263		221	214	101	-0.174574	0.861414	-0.174574	0.861414	15	14	0.880478		246	189	84	0.916515	0.359397	0.916515	0.359397	15	14	0.376588		270	165	60
2663.69	3754.18	0.330256	236	199	94	0.480079	0.631171	0.480079	0.631171	15	14	0.651619		222	184	79	0.873006	0.382661	0.873006	0.382661	14	14	0.401263		221	214	101	-0.174574	0.861414	-0.174574	0.861414	15	14	0.880478		246	189	84	0.916515	0.359397	0.916515	0.359397	15	14	0.376588		270	165	60
2665.62	3751.47	0.330495	236	199	94	0.480079	0.631171	0.480079	0.631171	15	14	0.651619		222	184	79	0.873006	0.382661	0.873006	0.382661	14	14	0.401263		221	214	101	-0.174574	0.861414	-0.174574	0.861414	15	14	0.880478		246	189	84	0.916515	0.359397	0.916515	0.359397	15	14	0.376588		270	165	60
2667.55	3748.75	0.330734	235	200	95	0.436436	0.662521	0.436436	0.662521	15	14	0.682954		221	185	80	0.827058	0.408205	0.827058	0.408205	14	14	0.427387		221	214	101	-0.174574	0.861414	-0.174574	0.861414	15	14	0.880478		246	189	84	0.916515	0.359397	0.916515	0.359397	15	14	0.376588		271	164	59
2669.48	3746.05	0.330973	236	199	94	0.480079	0.631171	0.480079	0.631171	15	14	0.651619		221	185	80	0.827058	0.408205	0.827058	0.408205	14	14	0.427387		221	214	101	-0.174574	0.861414	-0.174574	0.861414	15	14	0.880478		246	189	84	0.916515	0.359397	0.916515	0.359397	15	14	0.376588		270	165	60
2671.41	3743.34	0.331213	236	199	94	0.480079	0.631171	0.480079	0.631171	15	14	0.651619		221	185	80	0.827058	0.408205	0.827058	0.408205	14	14	0.427387		221	214	101	-0.174574	0.861414	-0.174574	0.861414	15	14	0.880478		246	189	84	0.916515	0.359397	0.916515	0.359397	15	14	0.376588		270	165	60
2673.34	3740.64	0.331452	236	199	94	0.480079	0.631171	0.480079	0.631171	15	14	0.651619		221	185	80	0.827058	0.408205	0.827058	0.408205	14	14	0.427387		222	213	102	-0.130931	0.89583	-0.130931	0.89583	15	14	0.914475		246	189	84	0.916515	0.359397	0.916515	0.359397	15	14	0.376588		270	165	60
2675.27	3737.94	0.331691	236	199	94	0.480079	0.631171	0.480079	0.631171	15	14	0.651619		221	185	80	0.827058	0.408205	0.827058	0.408205	14	14	0.427387		222	213	102	-0.130931	0.89583	-0.130931	0.89583	15	14	0.914475		246	189	84	0.916515	0.359397	0.916515	0.359397	15	14	0.376588		270	165	60
2677.2	3735.25	0.33193	235	200	95	0.436436	0.662521	0.436436	0.662521	15	14	0.682954		221	185	80	0.827058	0.408205	0.827058	0.408205	14	14	0.427387		222	213	102	-0.130931	0.89583	-0.130931	0.89583	15	14	0.914475		246	189	84	0.916515	0.359397	0.916515	0.359397	15	14	0.376588		270	165	60
2679.13	3732.56	0.332169	235	200	95	0.436436	0.662521	0.436436	0.662521	15	14	0.682954		221	185	80	0.827058	0.408205	0.827058	0.408205	14	14	0.427387		222	213	102	-0.130931	0.89583	-0.130931	0.89583	15	14	0.914475		246	189	84	0.916515	0.359397	0.916515	0.359397	15	14	0.376588		270	165	60
2681.05	3729.88	0.332408	236	199	94	0.480079	0.631171	0.480079	0.631171	15	14	0.651619		221	185	80	0.827058	0.408205	0.827058	0.408205	14	14	0.427387		222	213	102	-0.130931	0.89583	-0.130931	0.89583	15	14	0.914475		246	189	84	0.916515	0.359397	0.916515	0.359397	15	14	0.376588		270	165	60
2682.98	3727.19	0.332647	235	200	95	0.436436	0.662521	0.436436	0.662521	15	14	0.682954		221	185	80	0.827058	0.408205	0.827058	0.408205	14	14	0.427387		222	213	102	-0.130931	0.89583	-0.130931	0.89583	15	14	0.914475		246	189	84	0.916515	0.359397	0.916515	0.359397	15	14	0.376588		270	165	60
2684.91	3724.52	0.332887	235	200	95	0.436436	0.662521	0.436436	0.662521	15	14	0.682954		221	185	80	0.827058	0.408205	0.827058	0.408205	14	14	0.427387		222	213	102	-0.130931	0.89583	-0.130931	0.89583	15	14	0.914475		246	189	84	0.916515	0.359397	0.916515	0.359397	15	14	0.376588		270	165	60
2686.84	3721.84	0.333126	235	200	95	0.436436	0.662521	0.436436	0.662521	15	14	0.682954		221	185	80	0.827058	0.408205	0.827058	0.408205	14	14	0.427387		222	213	102	-0.130931	0.89583	-0.130931	0.89583	15	14	0.914475		245	190	85	0.872872	0.382734	0.872872	0.382734	15	14	0.400494		270	165	60
2688.77	3719.17	0.333365	235	200	95	0.436436	0.662521	0.436436	0.662521	15	14	0.682954		222	184	79	0.873006	0.382661	0.873006	0.382661	14	14	0.401263		222	213	102	-0.130931	0.89583	-0.130931	0.89583	15	14	0.914475		245	190	85	0.872872	0.382734	0.872872	0.382734	15	14	0.400494		270	165	60
2690.7	3716.51	0.333604	236	199	94	0.480079	0.631171	0.480079	0.631171	15	14	0.651619		222	184	79	0.873006	0.382661	0.873006	0.382661	14	14	0.401263		222	213	102	-0.130931	0.89583	-0.130931	0.89583	15	14	0.914475		245	190	85	0.872872	0.382734	0.872872	0.382734	15	14	0.400494		271	164	59
2692.63	3713.85	0.333843	236	199	94	0.480079	0.631171	0.480079	0.631171	15	14	0.651619		222	184	79	0.873006	0.382661	0.873006	0.382661	14	14	0.401263		222	213	102	-0.130931	0.89583	-0.130931	0.89583	15	14	0.914475		245	190	85	0.872872	0.382734	0.872872	0.382734	15	14	0.400494		270	165	60
2694.56	3711.19	0.334082	235	200	95	0.436436	0.662521	0.436436	0.662521	15	14	0.682954		222	184	79	0.873006	0.382661	0.873006	0.382661	14	14	0.401263		222	213	102	-0.130931	0.89583	-0.130931	0.89583	15	14	0.914475		245	190	85	0.872872	0.382734	0.872872	0.382734	15	14	0.400494		269	166	61
2696.48	3708.53	0.334321	234	201	96	0.392792	0.694473	0.392792	0.694473	15	14	0.71483		222	184	79	0.873006	0.382661	0.873006	0.382661	14	14	0.401263		222	213	102	-0.130931	0.89583	-0.130931	0.89583	15	14	0.914475		245	190	85	0.872872	0.382734	0.872872	0.382734	15	14	0.400494		269	166	61
2698.41	3705.88	0.334561	235	200	95	0.436436	0.662521	0.436436	0.662521	15	14	0.682954		222	184	79	0.873006	0.382661	0.873006	0.382661	14	14	0.401263		222	213	102	-0.130931	0.89583	-0.130931	0.89583	15	14	0.914475		245	190	85	0.872872	0.382734	0.872872	0.382734	15	14	0.400494		269	166	61
2700.34	3703.23	0.3348	235	200	95	0.436436	0.662521	0.436436	0.662521	15	14	0.682954		222	184	79	0.873006	0.382661	0.873006	0.382661	14	14	0.401263		223	212	103	-0.087287	0.930443	-0.087287	0.930443	15	14	0.948623		245	190	85	0.872872	0.382734	0.872872	0.382734	15	14	0.400494		269	166	61
2702.27	3700.59	0.335039	235	200	95	0.436436	0.662521	0.436436	0.662521	15	14	0.682954		222	184	79	0.873006	0.382661	0.873006	0.382661	14	14	0.401263		223	212	103	-0.087287	0.930443	-0.087287	0.930443	15	14	0.948623		245	190	85	0.872872	0.382734	0.872872	0.382734	15	14	0.400494		269	166	61
2704.2	3697.95	0.335278	235	200	95	0.436436	0.662521	0.436436	0.662521	15	14	0.682954		222	184	79	0.873006	0.382661	0.873006	0.382661	14	14	0.401263		224	211	104	-0.043644	0.965189	-0.043644	0.965189	15	14	0.982865		245	190	85	0.872872	0.382734	0.872872	0.382734	15	14	0.400494		269	166	61
2706.13	3695.32	0.335517	235	200	95	0.436436	0.662521	0.436436	0.662521	15	14	0.682954		222	184	79	0.873006	0.382661	0.873006	0.382661	14	14	0.401263		224	211	104	-0.043644	0.965189	-0.043644	0.965189	15	14	0.982865		245	190	85	0.872872	0.382734	0.872872	0.382734	15	14	0.400494		269	166	61
2708.06	3692.68	0.335756	235	200	95	0.436436	0.662521	0.436436	0.662521	15	14	0.682954		222	184	79	0.873006	0.382661	0.873006	0.382661	14	14	0.401263		224	211	104	-0.043644	0.965189	-0.043644	0.965189	15	14	0.982865		245	190	85	0.872872	0.382734	0.872872	0.382734	15	14	0.400494		269	166	61
2709.99	3690.06	0.335995	236	199	94	0.480079	0.631171	0.480079	0.631171	15	14	0.651619		222	184	79	0.873006	0.382661	0.873006	0.382661	14	14	0.401263		224	211	104	-0.043644	0.965189	-0.043644	0.965189	15	14	0.982865		245	190	85	0.872872	0.382734	0.872872	0.382734	15	14	0.400494		269	166	61
2711.92	3687.43	0.336235	235	200	95	0.436436	0.662521	0.436436	0.662521	15	14	0.682954		221	185	80	0.827058	0.408205	0.827058	0.408205	14	14	0.427387		224	211	104	-0.043644	0.965189	-0.043644	0.965189	15	14	0.982865		244	191	86	0.829228	0.406976	0.829228	0.406976	15	14	0.425262		269	166	61
2713.84	3684.81	0.336474	235	200	95	0.436436	0.662521	0.436436	0.662521	15	14	0.682954		222	184	79	0.873006	0.382661	0.873006	0.382661	14	14	0.401263		224	211	104	-0.043644	0.965189	-0.043644	0.965189	15	14	0.982865		245	190	85	0.872872	0.382734	0.872872	0.382734	15	14	0.400494		269	166	61
2715.77	3682.19	0.336713	236	199	94	0.480079	0.631171	0.480079	0.631171	15	14	0.651619		222	184	79	0.873006	0.382661	0.873006	0.382661	14	14	0.401263		224	211	104	-0.043644	0.965189	-0.043644	0.965189	15	14	0.982865		245	190	85	0.872872	0.382734	0.872872	0.382734	15	14	0.400494		269	166	61
2717.7	3679.58	0.336952	235	200	95	0.436436	0.662521	0.436436	0.662521	15	14	0.682954		222	184	79	0.873006	0.382661	0.873006	0.382661	14	14	0.401263		224	211	104	-0.043644	0.965189	-0.043644	0.965189	15	14	0.982865		245	190	85	0.872872	0.382734	0.872872	0.382734	15	14	0.400494		270	165	60
2719.63	3676.97	0.337191	236	199	94	0.480079	0.631171	0.480079	0.631171	15	14	0.651619		222	184	79	0.873006	0.382661	0.873006	0.382661	14	14	0.401263		224	211	104	-0.043644	0.965189	-0.043644	0.965189	15	14	0.982865		246	189	84	0.916515	0.359397	0.916515	0.359397	15	14	0.376588		269	166	61
2721.56	3674.36	0.33743	236	199	94	0.480079	0.631171	0.480079	0.631171	15	14	0.651619		223	183	78	0.918954	0.358121	0.918954	0.358121	14	14	0.376095		224	211	104	-0.043644	0.965189	-0.043644	0.965189	15	14	0.982865		245	190	85	0.872872	0.382734	0.872872	0.382734	15	14	0.400494		269	166	61
2723.49	3671.76	0.337669	236	199	94	0.480079	0.631171	0.480079	0.631171	15	14	0.651619		223	183	78	0.918954	0.358121	0.918954	0.358121	14	14	0.376095		224	211	104	-0.043644	0.965189	-0.043644	0.965189	15	14	0.982865		245	190	85	0.872872	0.382734	0.872872	0.382734	15	14	0.400494		269	166	61
2725.42	3669.16	0.337909	236	199	94	0.480079	0.631171	0.480079	0.631171	15	14	0.651619		224	182	77	0.964901	0.334595	0.964901	0.334595	14	14	0.35189		224	211	104	-0.043644	0.965189	-0.043644	0.965189	15	14	0.982865		245	190	85	0.872872	0.382734	0.872872	0.382734	15	14	0.400494		269	166	61
2727.35	3666.57	0.338148	236	199	94	0.480079	0.631171	0.480079	0.631171	15	14	0.651619		224	182	77	0.964901	0.334595	0.964901	0.334595	14	14	0.35189		224	211	104	-0.043644	0.965189	-0.043644	0.965189	15	14	0.982865		245	190	85	0.872872	0.382734	0.872872	0.382734	15	14	0.400494		268	167	62
2729.27	3663.98	0.338387	235	200	95	0.436436	0.662521	0.436436	0.662521	15	14	0.682954		224	182	77	0.964901	0.334595	0.964901	0.334595	14	14	0.35189		223	212	103	-0.087287	0.930443	-0.087287	0.930443	15	14	0.948623		245	190	85	0.872872	0.382734	0.872872	0.382734	15	14	0.400494		268	167	62
2731.2	3661.39	0.338626	235	200	95	0.436436	0.662521	0.436436	0.662521	15	14	0.682954		224	182	77	0.964901	0.334595	0.964901	0.334595	14	14	0.35189		223	212	103	-0.087287	0.930443	-0.087287	0.930443	15	14	0.948623		246	189	84	0.916515	0.359397	0.916515	0.359397	15	14	0.376588		268	167	62
2733.13	3658.81	0.338865	235	200	95	0.436436	0.662521	0.436436	0.662521	15	14	0.682954		224	182	77	0.964901	0.334595	0.964901	0.334595	14	14	0.35189		223	212	103	-0.087287	0.930443	-0.087287	0.930443	15	14	0.948623		246	189	84	0.916515	0.359397	0.916515	0.359397	15	14	0.376588		268	167	62
2735.06	3656.23	0.339104	235	200	95	0.436436	0.662521	0.436436	0.662521	15	14	0.682954		224	182	77	0.964901	0.334595	0.964901	0.334595	14	14	0.35189		223	212	103	-0.087287	0.930443	-0.087287	0.930443	15	14	0.948623		246	189	84	0.916515	0.359397	0.916515	0.359397	15	14	0.376588		268	167	62
2736.99	3653.65	0.339343	235	200	95	0.436436	0.662521	0.436436	0.662521	15	14	0.682954		224	182	77	0.964901	0.334595	0.964901	0.334595	14	14	0.35189		224	211	104	-0.043644	0.965189	-0.043644	0.965189	15	14	0.982865		245	190	85	0.872872	0.382734	0.872872	0.382734	15	14	0.400494		267	168	63
2738.92	3651.08	0.339583	235	200	95	0.436436	0.662521	0.436436	0.662521	15	14	0.682954		224	182	77	0.964901	0.334595	0.964901	0.334595	14	14	0.35189		224	211	104	-0.043644	0.965189	-0.043644	0.965189	15	14	0.982865		245	190	85	0.872872	0.382734	0.872872	0.382734	15	14	0.400494		267	168	63
2740.85	3648.51	0.339822	235	200	95	0.436436	0.662521	0.436436	0.662521	15	14	0.682954		224	182	77	0.964901	0.334595	0.964901	0.334595	14	14	0.35189		224	211	104	-0.043644	0.965189	-0.043644	0.965189	15	14	0.982865		247	188	83	0.960159	0.336976	0.960159	0.336976	15	14	0.353554		267	168	63
2742.78	3645.94	0.340061	235	200	95	0.436436	0.662521	0.436436	0.662521	15	14	0.682954		224	182	77	0.964901	0.334595	0.964901	0.334595	14	14	0.35189		224	211	104	-0.043644	0.965189	-0.043644	0.965189	15	14	0.982865		247	188	83	0.960159	0.336976	0.960159	0.336976	15	14	0.353554		267	168	63
2744.71	3643.38	0.3403	235	200	95	0.436436	0.662521	0.436436	0.662521	15	14	0.682954		224	182	77	0.964901	0.334595	0.964901	0.334595	14	14	0.35189		224	211	104	-0.043644	0.965189	-0.043644	0.965189	15	14	0.982865		247	188	83	0.960159	0.336976	0.960159	0.336976	15	14	0.353554		266	169	64
2746.63	3640.82	0.340539	235	200	95	0.436436	0.662521	0.436436	0.662521	15	14	0.682954		224	182	77	0.964901	0.334595	0.964901	0.334595	14	14	0.35189		224	211	104	-0.043644	0.965189	-0.043644	0.965189	15	14	0.982865		247	188	83	0.960159	0.336976	0.960159	0.336976	15	14	0.353554		266	169	64
2748.56	3638.27	0.340778	235	200	95	0.436436	0.662521	0.436436	0.662521	15	14	0.682954		223	183	78	0.918954	0.358121	0.918954	0.358121	14	14	0.376095		224	211	104	-0.043644	0.965189	-0.043644	0.965189	15	14	0.982865		247	188	83	0.960159	0.336976	0.960159	0.336976	15	14	0.353554		266	169	64
2750.49	3635.71	0.341017	235	200	95	0.436436	0.662521	0.436436	0.662521	15	14	0.682954		224	182	77	0.964901	0.334595	0.964901	0.334595	14	14	0.35189		224	211	104	-0.043644	0.965189	-0.043644	0.965189	15	14	0.982865		247	188	83	0.960159	0.336976	0.960159	0.336976	15	14	0.353554		266	169	64
2752.42	3633.17	0.341257	234	201	96	0.392792	0.694473	0.392792	0.694473	15	14	0.71483		224	182	77	0.964901	0.334595	0.964901	0.334595	14	14	0.35189		224	211	104	-0.043644	0.965189	-0.043644	0.965189	15	14	0.982865		247	188	83	0.960159	0.336976	0.960159	0.336976	15	14	0.353554		267	168	63
2754.35	3630.62	0.341496	234	201	96	0.392792	0.694473	0.392792	0.694473	15	14	0.71483		224	182	77	0.964901	0.334595	0.964901	0.334595	14	14	0.35189		224	211	104	-0.043644	0.965189	-0.043644	0.965189	15	14	0.982865		247	188	83	0.960159	0.336976	0.960159	0.336976	15	14	0.353554		267	168	63
2756.28	3628.08	0.341735	234	201	96	0.392792	0.694473	0.392792	0.694473	15	14	0.71483		224	182	77	0.964901	0.334595	0.964901	0.334595	14	14	0.35189		225	210	105	0	1	0	1	15	14	1.01713		247	188	83	0.960159	0.336976	0.960159	0.336976	15	14	0.353554		267	168	63
2758.21	3625.54	0.341974	234	201	96	0.392792	0.694473	0.392792	0.694473	15	14	0.71483		224	182	77	0.964901	0.334595	0.964901	0.334595	14	14	0.35189		226	209	104	0.043644	0.965189	0.043644	0.965189	15	14	0.982865		247	188	83	0.960159	0.336976	0.960159	0.336976	15	14	0.353554		267	168	63
2760.14	3623.01	0.342213	234	201	96	0.392792	0.694473	0.392792	0.694473	15	14	0.71483		224	182	77	0.964901	0.334595	0.964901	0.334595	14	14	0.35189		226	209	104	0.043644	0.965189	0.043644	0.965189	15	14	0.982865		247	188	83	0.960159	0.336976	0.960159	0.336976	15	14	0.353554		267	168	63
2762.06	3620.48	0.342452	234	201	96	0.392792	0.694473	0.392792	0.694473	15	14	0.71483		224	182	77	0.964901	0.334595	0.964901	0.334595	14	14	0.35189		226	209	104	0.043644	0.965189	0.043644	0.965189	15	14	0.982865		248	187	82	1.0038	0.315475	1.0038	0.315475	15	14	0.331405		267	168	63
2763.99	3617.95	0.342691	234	201	96	0.392792	0.694473	0.392792	0.694473	15	14	0.71483		224	182	77	0.964901	0.334595	0.964901	0.334595	14	14	0.35189		226	209	104	0.043644	0.965189	0.043644	0.965189	15	14	0.982865		248	187	82	1.0038	0.315475	1.0038	0.315475	15	14	0.331405		267	168	63
2765.92	3615.43	0.342931	235	200	95	0.436436	0.662521	0.436436	0.662521	15	14	0.682954		224	182	77	0.964901	0.334595	0.964901	0.334595	14	14	0.35189		226	209	104	0.043644	0.965189	0.043644	0.965189	15	14	0.982865		248	187	82	1.0038	0.315475	1.0038	0.315475	15	14	0.331405		267	168	63
2767.85	3612.91	0.34317	235	200	95	0.436436	0.662521	0.436436	0.662521	15	14	0.682954		225	181	76	1.01085	0.312089	1.01085	0.312089	14	14	0.328667		226	209	104	0.043644	0.965189	0.043644	0.965189	15	14	0.982865		248	187	82	1.0038	0.315475	1.0038	0.315475	15	14	0.331405		267	168	63
2769.78	3610.4	0.343409	235	200	95	0.436436	0.662521	0.436436	0.662521	15	14	0.682954		225	181	76	1.01085	0.312089	1.01085	0.312089	14	14	0.328667		226	209	104	0.043644	0.965189	0.043644	0.965189	15	14	0.982865		248	187	82	1.0038	0.315475	1.0038	0.315475	15	14	0.331405		267	168	63
2771.71	3607.88	0.343648	235	200	95	0.436436	0.662521	0.436436	0.662521	15	14	0.682954		224	182	77	0.964901	0.334595	0.964901	0.334595	14	14	0.35189		227	208	103	0.087287	0.930443	0.087287	0.930443	15	14	0.948623		248	187	82	1.0038	0.315475	1.0038	0.315475	15	14	0.331405		267	168	63
2773.64	3605.37	0.343887	235	200	95	0.436436	0.662521	0.436436	0.662521	15	14	0.682954		224	182	77	0.964901	0.334595	0.964901	0.334595	14	14	0.35189		228	207	102	0.130931	0.89583	0.130931	0.89583	15	14	0.914475		248	187	82	1.0038	0.315475	1.0038	0.315475	15	14	0.331405		267	168	63
2775.57	3602.87	0.344126	235	200	95	0.436436	0.662521	0.436436	0.662521	15	14	0.682954		224	182	77	0.964901	0.334595	0.964901	0.334595	14	14	0.35189		228	207	102	0.130931	0.89583	0.130931	0.89583	15	14	0.914475		248	187	82	1.0038	0.315475	1.0038	0.315475	15	14	0.331405		267	168	63
2777.5	3600.37	0.344365	235	200	95	0.436436	0.662521	0.436436	0.662521	15	14	0.682954		225	181	76	1.01085	0.312089	1.01085	0.312089	14	14	0.328667		228	207	102	0.130931	0.89583	0.130931	0.89583	15	14	0.914475		248	187	82	1.0038	0.315475	1.0038	0.315475	15	14	0.331405		267	168	63
2779.42	3597.87	0.344605	235	200	95	0.436436	0.662521	0.436436	0.662521	15	14	0.682954		225	181	76	1.01085	0.312089	1.01085	0.312089	14	14	0.328667		228	207	102	0.130931	0.89583	0.130931	0.89583	15	14	0.914475		248	187	82	1.0038	0.315475	1.0038	0.315475	15	14	0.331405		267	168	63
2781.35	3595.37	0.344844	235	200	95	0.436436	0.662521	0.436436	0.662521	15	14	0.682954		224	182	77	0.964901	0.334595	0.964901	0.334595	14	14	0.35189		228	207	102	0.130931	0.89583	0.130931	0.89583	15	14	0.914475		248	187	82	1.0038	0.315475	1.0038	0.315475	15	14	0.331405		268	167	62
2783.28	3592.88	0.345083	236	199	94	0.480079	0.631171	0.480079	0.631171	15	14	0.651619		224	182	77	0.964901	0.334595	0.964901	0.334595	14	14	0.35189		228	207	102	0.130931	0.89583	0.130931	0.89583	15	14	0.914475		248	187	82	1.0038	0.315475	1.0038	0.315475	15	14	0.331405		269	166	61
2785.21	3590.39	0.345322	236	199	94	0.480079	0.631171	0.480079	0.631171	15	14	0.651619		224	182	77	0.964901	0.334595	0.964901	0.334595	14	14	0.35189		228	207	102	0.130931	0.89583	0.130931	0.89583	15	14	0.914475		248	187	82	1.0038	0.315475	1.0038	0.315475	15	14	0.331405		269	166	61
2787.14	3587.91	0.345561	237	198	93	0.523723	0.600472	0.523723	0.600472	15	14	0.620867		225	181	76	1.01085	0.312089	1.01085	0.312089	14	14	0.328667		228	207	102	0.130931	0.89583	0.130931	0.89583	15	14	0.914475		248	187	82	1.0038	0.315475	1.0038	0.315475	15	14	0.331405		269	166	61
2789.07	3585.43	0.3458	237	198	93	0.523723	0.600472	0.523723	0.600472	15	14	0.620867		225	181	76	1.01085	0.312089	1.01085	0.312089	14	14	0.328667		228	207	102	0.130931	0.89583	0.130931	0.89583	15	14	0.914475		248	187	82	1.0038	0.315475	1.0038	0.315475	15	14	0.331405		269	166	61
2791	3582.95	0.346039	237	198	93	0.523723	0.600472	0.523723	0.600472	15	14	0.620867		226	180	75	1.0568	0.290605	1.0568	0.290605	14	14	0.306426		228	207	102	0.130931	0.89583	0.130931	0.89583	15	14	0.914475		248	187	82	1.0038	0.315475	1.0038	0.315475	15	14	0.331405		268	167	62
2792.93	3580.47	0.346279	237	198	93	0.523723	0.600472	0.523723	0.600472	15	14	0.620867		226	180	75	1.0568	0.290605	1.0568	0.290605	14	14	0.306426		228	207	102	0.130931	0.89583	0.130931	0.89583	15	14	0.914475		248	187	82	1.0038	0.315475	1.0038	0.315475	15	14	0.331405		268	167	62
2794.85	3578	0.346518	237	198	93	0.523723	0.600472	0.523723	0.600472	15	14	0.620867		225	181	76	1.01085	0.312089	1.01085	0.312089	14	14	0.328667		228	207	102	0.130931	0.89583	0.130931	0.89583	15	14	0.914475		248	187	82	1.0038	0.315475	1.0038	0.315475	15	14	0.331405		268	167	62
2796.78	3575.54	0.346757	237	198	93	0.523723	0.600472	0.523723	0.600472	15	14	0.620867		225	181	76	1.01085	0.312089	1.01085	0.312089	14	14	0.328667		228	207	102	0.130931	0.89583	0.130931	0.89583	15	14	0.914475		248	187	82	1.0038	0.315475	1.0038	0.315475	15	14	0.331405		268	167	62
2798.71	3573.07	0.346996	237	198	93	0.523723	0.600472	0.523723	0.600472	15	14	0.620867		225	181	76	1.01085	0.312089	1.01085	0.312089	14	14	0.328667		228	207	102	0.130931	0.89583	0.130931	0.89583	15	14	0.914475		248	187	82	1.0038	0.315475	1.0038	0.315475	15	14	0.331405		267	168	63
2800.64	3570.61	0.347235	237	198	93	0.523723	0.600472	0.523723	0.600472	15	14	0.620867		226	180	75	1.0568	0.290605	1.0568	0.290605	14	14	0.306426		228	207	102	0.130931	0.89583	0.130931	0.89583	15	14	0.914475		248	187	82	1.0038	0.315475	1.0038	0.315475	15	14	0.331405		267	168	63
2802.57	3568.15	0.347474	237	198	93	0.523723	0.600472	0.523723	0.600472	15	14	0.620867		226	180	75	1.0568	0.290605	1.0568	0.290605	14	14	0.306426		228	207	102	0.130931	0.89583	0.130931	0.89583	15	14	0.914475		248	187	82	1.0038	0.315475	1.0038	0.315475	15	14	0.331405		267	168	63
2804.5	3565.7	0.347713	237	198	93	0.523723	0.600472	0.523723	0.600472	15	14	0.620867		227	179	74	1.10274	0.270139	1.10274	0.270139	14	14	0.285176		228	207	102	0.130931	0.89583	0.130931	0.89583	15	14	0.914475		248	187	82	1.0038	0.315475	1.0038	0.315475	15	14	0.331405		267	168	63
2806.43	3563.25	0.347953	237	198	93	0.523723	0.600472	0.523723	0.600472	15	14	0.620867		228	178	73	1.14869	0.250684	1.14869	0.250684	14	14	0.26491		228	207	102	0.130931	0.89583	0.130931	0.89583	15	14	0.914475		249	186	81	1.04745	0.294895	1.04745	0.294895	15	14	0.310143		267	168	63
2808.36	3560.8	0.348192	237	198	93	0.523723	0.600472	0.523723	0.600472	15	14	0.620867		227	179	74	1.10274	0.270139	1.10274	0.270139	14	14	0.285176		228	207	102	0.130931	0.89583	0.130931	0.89583	15	14	0.914475		249	186	81	1.04745	0.294895	1.04745	0.294895	15	14	0.310143		268	167	62
2810.28	3558.36	0.348431	237	198	93	0.523723	0.600472	0.523723	0.600472	15	14	0.620867		227	179	74	1.10274	0.270139	1.10274	0.270139	14	14	0.285176		228	207	102	0.130931	0.89583	0.130931	0.89583	15	14	0.914475		249	186	81	1.04745	0.294895	1.04745	0.294895	15	14	0.310143		268	167	62
2812.21	3555.92	0.34867	237	198	93	0.523723	0.600472	0.523723	0.600472	15	14	0.620867		227	179	74	1.10274	0.270139	1.10274	0.270139	14	14	0.285176		228	207	102	0.130931	0.89583	0.130931	0.89583	15	14	0.914475		249	186	81	1.04745	0.294895	1.04745	0.294895	15	14	0.310143		268	167	62
2814.14	3553.48	0.348909	237	198	93	0.523723	0.600472	0.523723	0.600472	15	14	0.620867		228	178	73	1.14869	0.250684	1.14869	0.250684	14	14	0.26491		228	207	102	0.130931	0.89583	0.130931	0.89583	15	14	0.914475		250	185	80	1.09109	0.275234	1.09109	0.275234	15	14	0.289776		268	167	62
2816.07	3551.05	0.349148	237	198	93	0.523723	0.600472	0.523723	0.600472	15	14	0.620867		228	178	73	1.14869	0.250684	1.14869	0.250684	14	14	0.26491		228	207	102	0.130931	0.89583	0.130931	0.89583	15	14	0.914475		250	185	80	1.09109	0.275234	1.09109	0.275234	15	14	0.289776		267	168	63
2818	3548.62	0.349387	237	198	93	0.523723	0.600472	0.523723	0.600472	15	14	0.620867		228	178	73	1.14869	0.250684	1.14869	0.250684	14	14	0.26491		228	207	102	0.130931	0.89583	0.130931	0.89583	15	14	0.914475		250	185	80	1.09109	0.275234	1.09109	0.275234	15	14	0.289776		267	168	63
2819.93	3546.19	0.349627	237	198	93	0.523723	0.600472	0.523723	0.600472	15	14	0.620867		228	178	73	1.14869	0.250684	1.14869	0.250684	14	14	0.26491		228	207	102	0.130931	0.89583	0.130931	0.89583	15	14	0.914475		250	185	80	1.09109	0.275234	1.09109	0.275234	15	14	0.289776		267	168	63
2821.86	3543.76	0.349866	237	198	93	0.523723	0.600472	0.523723	0.600472	15	14	0.620867		228	178	73	1.14869	0.250684	1.14869	0.250684	14	14	0.26491		228	207	102	0.130931	0.89583	0.130931	0.89583	15	14	0.914475		250	185	80	1.09109	0.275234	1.09109	0.275234	15	14	0.289776		267	168	63
2823.79	3541.34	0.350105	237	198	93	0.523723	0.600472	0.523723	0.600472	15	14	0.620867		227	179	74	1.10274	0.270139	1.10274	0.270139	14	14	0.285176		229	206	101	0.174574	0.861414	0.174574	0.861414	15	14	0.880478		250	185	80	1.09109	0.275234	1.09109	0.275234	15	14	0.289776		267	168	63
2825.72	3538.93	0.350344	237	198	93	0.523723	0.600472	0.523723	0.600472	15	14	0.620867		227	179	74	1.10274	0.270139	1.10274	0.270139	14	14	0.285176		229	206	101	0.174574	0.861414	0.174574	0.861414	15	14	0.880478		250	185	80	1.09109	0.275234	1.09109	0.275234	15	14	0.289776		267	168	63
2827.64	3536.51	0.350583	237	198	93	0.523723	0.600472	0.523723	0.600472	15	14	0.620867		228	178	73	1.14869	0.250684	1.14869	0.250684	14	14	0.26491		229	206	101	0.174574	0.861414	0.174574	0.861414	15	14	0.880478		251	184	79	1.13473	0.256488	1.13473	0.256488	15	14	0.270299		267	168	63
2829.57	3534.1	0.350822	237	198	93	0.523723	0.600472	0.523723	0.600472	15	14	0.620867		228	178	73	1.14869	0.250684	1.14869	0.250684	14	14	0.26491		229	206	101	0.174574	0.861414	0.174574	0.861414	15	14	0.880478		250	185	80	1.09109	0.275234	1.09109	0.275234	15	14	0.289776		267	168	63
2831.5	3531.69	0.351061	237	198	93	0.523723	0.600472	0.523723	0.600472	15	14	0.620867		228	178	73	1.14869	0.250684	1.14869	0.250684	14	14	0.26491		229	206	101	0.174574	0.861414	0.174574	0.861414	15	14	0.880478		250	185	80	1.09109	0.275234	1.09109	0.275234	15	14	0.289776		267	168	63
2833.43	3529.29	0.351301	238	197	92	0.567367	0.570466	0.567367	0.570466	15	14	0.590745		228	178	73	1.14869	0.250684	1.14869	0.250684	14	14	0.26491		229	206	101	0.174574	0.861414	0.174574	0.861414	15	14	0.880478		251	184	79	1.13473	0.256488	1.13473	0.256488	15	14	0.270299		268	167	62
2835.36	3526.89	0.35154	239	196	91	0.61101	0.541193	0.61101	0.541193	15	14	0.561291		227	179	74	1.10274	0.270139	1.10274	0.270139	14	14	0.285176		230	205	100	0.218218	0.827259	0.218218	0.827259	15	14	0.846694		251	184	79	1.13473	0.256488	1.13473	0.256488	15	14	0.270299		268	167	62
2837.29	3524.49	0.351779	239	196	91	0.61101	0.541193	0.61101	0.541193	15	14	0.561291		227	179	74	1.10274	0.270139	1.10274	0.270139	14	14	0.285176		230	205	100	0.218218	0.827259	0.218218	0.827259	15	14	0.846694		249	186	81	1.04745	0.294895	1.04745	0.294895	15	14	0.310143		268	167	62
2839.22	3522.1	0.352018	239	196	91	0.61101	0.541193	0.61101	0.541193	15	14	0.561291		227	179	74	1.10274	0.270139	1.10274	0.270139	14	14	0.285176		231	204	99	0.261861	0.793428	0.261861	0.793428	15	14	0.813179		250	185	80	1.09109	0.275234	1.09109	0.275234	15	14	0.289776		268	167	62
2841.15	3519.71	0.352257	239	196	91	0.61101	0.541193	0.61101	0.541193	15	14	0.561291		228	178	73	1.14869	0.250684	1.14869	0.250684	14	14	0.26491		231	204	99	0.261861	0.793428	0.261861	0.793428	15	14	0.813179		250	185	80	1.09109	0.275234	1.09109	0.275234	15	14	0.289776		268	167	62
2843.07	3517.32	0.352496	239	196	91	0.61101	0.541193	0.61101	0.541193	15	14	0.561291		229	177	72	1.19464	0.232229	1.19464	0.232229	14	14	0.24563		231	204	99	0.261861	0.793428	0.261861	0.793428	15	14	0.813179		250	185	80	1.09109	0.275234	1.09109	0.275234	15	14	0.289776		268	167	62
2845	3514.93	0.352735	241	194	89	0.698297	0.484992	0.698297	0.484992	15	14	0.504539		229	177	72	1.19464	0.232229	1.19464	0.232229	14	14	0.24563		231	204	99	0.261861	0.793428	0.261861	0.793428	15	14	0.813179		250	185	80	1.09109	0.275234	1.09109	0.275234	15	14	0.289776		268	167	62
2846.93	3512.55	0.352975	242	193	88	0.741941	0.458124	0.741941	0.458124	15	14	0.477307		229	177	72	1.19464	0.232229	1.19464	0.232229	14	14	0.24563		230	205	100	0.218218	0.827259	0.218218	0.827259	15	14	0.846694		250	185	80	1.09109	0.275234	1.09109	0.275234	15	14	0.289776		268	167	62
2848.86	3510.17	0.353214	244	191	86	0.829228	0.406976	0.829228	0.406976	15	14	0.425262		229	177	72	1.19464	0.232229	1.19464	0.232229	14	14	0.24563		230	205	100	0.218218	0.827259	0.218218	0.827259	15	14	0.846694		250	185	80	1.09109	0.275234	1.09109	0.275234	15	14	0.289776		268	167	62
2850.79	3507.8	0.353453	245	190	85	0.872872	0.382734	0.872872	0.382734	15	14	0.400494		228	178	73	1.14869	0.250684	1.14869	0.250684	14	14	0.26491		231	204	99	0.261861	0.793428	0.261861	0.793428	15	14	0.813179		250	185	80	1.09109	0.275234	1.09109	0.275234	15	14	0.289776		269	166	61
2852.72	3505.43	0.353692	243	192	87	0.785584	0.432112	0.785584	0.432112	15	14	0.450872		228	178	73	1.14869	0.250684	1.14869	0.250684	14	14	0.26491		232	203	98	0.305505	0.759982	0.305505	0.759982	15	14	0.779995		250	185	80	1.09109	0.275234	1.09109	0.275234	15	14	0.289776		269	166	61
2854.65	3503.06	0.353931	242	193	88	0.741941	0.458124	0.741941	0.458124	15	14	0.477307		228	178	73	1.14869	0.250684	1.14869	0.250684	14	14	0.26491		231	204	99	0.261861	0.793428	0.261861	0.793428	15	14	0.813179		250	185	80	1.09109	0.275234	1.09109	0.275234	15	14	0.289776		268	167	62
2856.58	3500.69	0.35417	242	193	88	0.741941	0.458124	0.741941	0.458124	15	14	0.477307		229	177	72	1.19464	0.232229	1.19464	0.232229	14	14	0.24563		231	204	99	0.261861	0.793428	0.261861	0.793428	15	14	0.813179		250	185	80	1.09109	0.275234	1.09109	0.275234	15	14	0.289776		269	166	61
2858.51	3498.33	0.354409	241	194	89	0.698297	0.484992	0.698297	0.484992	15	14	0.504539		229	177	72	1.19464	0.232229	1.19464	0.232229	14	14	0.24563		232	203	98	0.305505	0.759982	0.305505	0.759982	15	14	0.779995		252	183	78	1.17838	0.238647	1.17838	0.238647	15	14	0.251712		269	166	61
2860.43	3495.97	0.354649	240	195	90	0.654654	0.512691	0.654654	0.512691	15	14	0.532545		229	177	72	1.19464	0.232229	1.19464	0.232229	14	14	0.24563		232	203	98	0.305505	0.759982	0.305505	0.759982	15	14	0.779995		252	183	78	1.17838	0.238647	1.17838	0.238647	15	14	0.251712		269	166	61
2862.36	3493.62	0.354888	240	195	90	0.654654	0.512691	0.654654	0.512691	15	14	0.532545		229	177	72	1.19464	0.232229	1.19464	0.232229	14	14	0.24563		231	204	99	0.261861	0.793428	0.261861	0.793428	15	14	0.813179		253	182	77	1.22202	0.221701	1.22202	0.221701	15	14	0.234007		270	165	60
2864.29	3491.26	0.355127	240	195	90	0.654654	0.512691	0.654654	0.512691	15	14	0.532545		229	177	72	1.19464	0.232229	1.19464	0.232229	14	14	0.24563		233	202	97	0.349149	0.726978	0.349149	0.726978	15	14	0.747192		252	183	78	1.17838	0.238647	1.17838	0.238647	15	14	0.251712		270	165	60
2866.22	3488.92	0.355366	240	195	90	0.654654	0.512691	0.654654	0.512691	15	14	0.532545		229	177	72	1.19464	0.232229	1.19464	0.232229	14	14	0.24563		233	202	97	0.349149	0.726978	0.349149	0.726978	15	14	0.747192		253	182	77	1.22202	0.221701	1.22202	0.221701	15	14	0.234007		270	165	60
2868.15	3486.57	0.355605	240	195	90	0.654654	0.512691	0.654654	0.512691	15	14	0.532545		229	177	72	1.19464	0.232229	1.19464	0.232229	14	14	0.24563		233	202	97	0.349149	0.726978	0.349149	0.726978	15	14	0.747192		253	182	77	1.22202	0.221701	1.22202	0.221701	15	14	0.234007		270	165	60
2870.08	3484.23	0.355844	240	195	90	0.654654	0.512691	0.654654	0.512691	15	14	0.532545		229	177	72	1.19464	0.232229	1.19464	0.232229	14	14	0.24563		233	202	97	0.349149	0.726978	0.349149	0.726978	15	14	0.747192		252	183	78	1.17838	0.238647	1.17838	0.238647	15	14	0.251712		270	165	60
2872.01	3481.89	0.356083	240	195	90	0.654654	0.512691	0.654654	0.512691	15	14	0.532545		229	177	72	1.19464	0.232229	1.19464	0.232229	14	14	0.24563		234	201	96	0.392792	0.694473	0.392792	0.694473	15	14	0.71483		253	182	77	1.22202	0.221701	1.22202	0.221701	15	14	0.234007		271	164	59
2873.94	3479.55	0.356323	240	195	90	0.654654	0.512691	0.654654	0.512691	15	14	0.532545		229	177	72	1.19464	0.232229	1.19464	0.232229	14	14	0.24563		233	202	97	0.349149	0.726978	0.349149	0.726978	15	14	0.747192		253	182	77	1.22202	0.221701	1.22202	0.221701	15	14	0.234007		271	164	59
2875.86	3477.22	0.356562	240	195	90	0.654654	0.512691	0.654654	0.512691	15	14	0.532545		229	177	72	1.19464	0.232229	1.19464	0.232229	14	14	0.24563		234	201	96	0.392792	0.694473	0.392792	0.694473	15	14	0.71483		254	181	76	1.26566	0.205634	1.26566	0.205634	15	14	0.217176		271	164	59
2877.79	3474.88	0.356801	240	195	90	0.654654	0.512691	0.654654	0.512691	15	14	0.532545		230	176	71	1.24059	0.214759	1.24059	0.214759	14	14	0.227321		234	201	96	0.392792	0.694473	0.392792	0.694473	15	14	0.71483		254	181	76	1.26566	0.205634	1.26566	0.205634	15	14	0.217176		271	164	59
2879.72	3472.56	0.35704	241	194	89	0.698297	0.484992	0.698297	0.484992	15	14	0.504539		229	177	72	1.19464	0.232229	1.19464	0.232229	14	14	0.24563		234	201	96	0.392792	0.694473	0.392792	0.694473	15	14	0.71483		256	179	74	1.35295	0.176072	1.35295	0.176072	15	14	0.186083		271	164	59
2881.65	3470.23	0.357279	241	194	89	0.698297	0.484992	0.698297	0.484992	15	14	0.504539		229	177	72	1.19464	0.232229	1.19464	0.232229	14	14	0.24563		234	201	96	0.392792	0.694473	0.392792	0.694473	15	14	0.71483		257	178	73	1.39659	0.162537	1.39659	0.162537	15	14	0.171789		271	164	59
2883.58	3467.91	0.357518	242	193	88	0.741941	0.458124	0.741941	0.458124	15	14	0.477307		230	176	71	1.24059	0.214759	1.24059	0.214759	14	14	0.227321		235	200	95	0.436436	0.662521	0.436436	0.662521	15	14	0.682954		257	178	73	1.39659	0.162537	1.39659	0.162537	15	14	0.171789		271	164	59
2885.51	3465.59	0.357757	243	192	87	0.785584	0.432112	0.785584	0.432112	15	14	0.450872		230	176	71	1.24059	0.214759	1.24059	0.214759	14	14	0.227321		236	199	94	0.480079	0.631171	0.480079	0.631171	15	14	0.651619		258	177	72	1.44024	0.149801	1.44024	0.149801	15	14	0.158309		271	164	59
2887.44	3463.28	0.357997	243	192	87	0.785584	0.432112	0.785584	0.432112	15	14	0.450872		231	175	70	1.28653	0.198257	1.28653	0.198257	14	14	0.209978		237	198	93	0.523723	0.600472	0.523723	0.600472	15	14	0.620867		258	177	72	1.44024	0.149801	1.44024	0.149801	15	14	0.158309		271	164	59
2889.37	3460.97	0.358236	241	194	89	0.698297	0.484992	0.698297	0.484992	15	14	0.504539		230	176	71	1.24059	0.214759	1.24059	0.214759	14	14	0.227321		237	198	93	0.523723	0.600472	0.523723	0.600472	15	14	0.620867		258	177	72	1.44024	0.149801	1.44024	0.149801	15	14	0.158309		271	164	59
2891.3	3458.66	0.358475	241	194	89	0.698297	0.484992	0.698297	0.484992	15	14	0.504539		232	174	69	1.33248	0.182703	1.33248	0.182703	14	14	0.193579		236	199	94	0.480079	0.631171	0.480079	0.631171	15	14	0.651619		258	177	72	1.44024	0.149801	1.44024	0.149801	15	14	0.158309		271	164	59
2893.22	3456.35	0.358714	244	191	86	0.829228	0.406976	0.829228	0.406976	15	14	0.425262		230	176	71	1.24059	0.214759	1.24059	0.214759	14	14	0.227321		238	197	92	0.567367	0.570466	0.567367	0.570466	15	14	0.590745		258	177	72	1.44024	0.149801	1.44024	0.149801	15	14	0.158309		271	164	59
2895.15	3454.05	0.358953	243	192	87	0.785584	0.432112	0.785584	0.432112	15	14	0.450872		230	176	71	1.24059	0.214759	1.24059	0.214759	14	14	0.227321		238	197	92	0.567367	0.570466	0.567367	0.570466	15	14	0.590745		258	177	72	1.44024	0.149801	1.44024	0.149801	15	14	0.158309		271	164	59
2897.08	3451.75	0.359192	243	192	87	0.785584	0.432112	0.785584	0.432112	15	14	0.450872		230	176	71	1.24059	0.214759	1.24059	0.214759	14	14	0.227321		238	197	92	0.567367	0.570466	0.567367	0.570466	15	14	0.590745		259	176	71	1.48388	0.137841	1.48388	0.137841	15	14	0.145619		271	164	59
2899.01	3449.45	0.359431	243	192	87	0.785584	0.432112	0.785584	0.432112	15	14	0.450872		228	178	73	1.14869	0.250684	1.14869	0.250684	14	14	0.26491		237	198	93	0.523723	0.600472	0.523723	0.600472	15	14	0.620867		260	175	70	1.52753	0.126631	1.52753	0.126631	15	14	0.1337		271	164	59
2900.94	3447.16	0.359671	243	192	87	0.785584	0.432112	0.785584	0.432112	15	14	0.450872		229	177	72	1.19464	0.232229	1.19464	0.232229	14	14	0.24563		237	198	93	0.523723	0.600472	0.523723	0.600472	15	14	0.620867		260	175	70	1.52753	0.126631	1.52753	0.126631	15	14	0.1337		272	163	58
2902.87	3444.87	0.35991	245	190	85	0.872872	0.382734	0.872872	0.382734	15	14	0.400494		229	177	72	1.19464	0.232229	1.19464	0.232229	14	14	0.24563		237	198	93	0.523723	0.600472	0.523723	0.600472	15	14	0.620867		260	175	70	1.52753	0.126631	1.52753	0.126631	15	14	0.1337		273	162	57
2904.8	3442.58	0.360149	245	190	85	0.872872	0.382734	0.872872	0.382734	15	14	0.400494		229	177	72	1.19464	0.232229	1.19464	0.232229	14	14	0.24563		237	198	93	0.523723	0.600472	0.523723	0.600472	15	14	0.620867		260	175	70	1.52753	0.126631	1.52753	0.126631	15	14	0.1337		273	162	57
2906.73	3440.3	0.360388	245	190	85	0.872872	0.382734	0.872872	0.382734	15	14	0.400494		229	177	72	1.19464	0.232229	1.19464	0.232229	14	14	0.24563		237	198	93	0.523723	0.600472	0.523723	0.600472	15	14	0.620867		261	174	69	1.57117	0.116144	1.57117	0.116144	15	14	0.122524		273	162	57
2908.65	3438.02	0.360627	245	190	85	0.872872	0.382734	0.872872	0.382734	15	14	0.400494		229	177	72	1.19464	0.232229	1.19464	0.232229	14	14	0.24563		237	198	93	0.523723	0.600472	0.523723	0.600472	15	14	0.620867		261	174	69	1.57117	0.116144	1.57117	0.116144	15	14	0.122524		273	162	57
2910.58	3435.74	0.360866	246	189	84	0.916515	0.359397	0.916515	0.359397	15	14	0.376588		230	176	71	1.24059	0.214759	1.24059	0.214759	14	14	0.227321		237	198	93	0.523723	0.600472	0.523723	0.600472	15	14	0.620867		261	174	69	1.57117	0.116144	1.57117	0.116144	15	14	0.122524		273	162	57
2912.51	3433.46	0.361105	247	188	83	0.960159	0.336976	0.960159	0.336976	15	14	0.353554		230	176	71	1.24059	0.214759	1.24059	0.214759	14	14	0.227321		237	198	93	0.523723	0.600472	0.523723	0.600472	15	14	0.620867		263	172	67	1.65846	0.097226	1.65846	0.097226	15	14	0.102309		273	162	57
2914.44	3431.19	0.361345	247	188	83	0.960159	0.336976	0.960159	0.336976	15	14	0.353554		231	175	70	1.28653	0.198257	1.28653	0.198257	14	14	0.209978		238	197	92	0.567367	0.570466	0.567367	0.570466	15	14	0.590745		263	172	67	1.65846	0.097226	1.65846	0.097226	15	14	0.102309		272	163	58
2916.37	3428.92	0.361584	248	187	82	1.0038	0.315475	1.0038	0.315475	15	14	0.331405		231	175	70	1.28653	0.198257	1.28653	0.198257	14	14	0.209978		237	198	93	0.523723	0.600472	0.523723	0.600472	15	14	0.620867		264	171	66	1.7021	0.088738	1.7021	0.088738	15	14	0.093216		273	162	57
2918.3	3426.65	0.361823	249	186	81	1.04745	0.294895	1.04745	0.294895	15	14	0.310143		231	175	70	1.28653	0.198257	1.28653	0.198257	14	14	0.209978		237	198	93	0.523723	0.600472	0.523723	0.600472	15	14	0.620867		264	171	66	1.7021	0.088738	1.7021	0.088738	15	14	0.093216		273	162	57
2920.23	3424.39	0.362062	250	185	80	1.09109	0.275234	1.09109	0.275234	15	14	0.289776		231	175	70	1.28653	0.198257	1.28653	0.198257	14	14	0.209978		237	198	93	0.523723	0.600472	0.523723	0.600472	15	14	0.620867		263	172	67	1.65846	0.097226	1.65846	0.097226	15	14	0.102309		274	161	56
2922.16	3422.13	0.362301	250	185	80	1.09109	0.275234	1.09109	0.275234	15	14	0.289776		231	175	70	1.28653	0.198257	1.28653	0.198257	14	14	0.209978		237	198	93	0.523723	0.600472	0.523723	0.600472	15	14	0.620867		264	171	66	1.7021	0.088738	1.7021	0.088738	15	14	0.093216		276	159	54
2924.09	3419.87	0.36254	250	185	80	1.09109	0.275234	1.09109	0.275234	15	14	0.289776		231	175	70	1.28653	0.198257	1.28653	0.198257	14	14	0.209978		237	198	93	0.523723	0.600472	0.523723	0.600472	15	14	0.620867		263	172	67	1.65846	0.097226	1.65846	0.097226	15	14	0.102309		276	159	54
2926.01	3417.62	0.362779	250	185	80	1.09109	0.275234	1.09109	0.275234	15	14	0.289776		231	175	70	1.28653	0.198257	1.28653	0.198257	14	14	0.209978		238	197	92	0.567367	0.570466	0.567367	0.570466	15	14	0.590745		263	172	67	1.65846	0.097226	1.65846	0.097226	15	14	0.102309		277	158	53
2927.94	3415.37	0.363019	250	185	80	1.09109	0.275234	1.09109	0.275234	15	14	0.289776		231	175	70	1.28653	0.198257	1.28653	0.198257	14	14	0.209978		238	197	92	0.567367	0.570466	0.567367	0.570466	15	14	0.590745		263	172	67	1.65846	0.097226	1.65846	0.097226	15	14	0.102309		277	158	53
2929.87	3413.12	0.363258	250	185	80	1.09109	0.275234	1.09109	0.275234	15	14	0.289776		231	175	70	1.28653	0.198257	1.28653	0.198257	14	14	0.209978		238	197	92	0.567367	0.570466	0.567367	0.570466	15	14	0.590745		264	171	66	1.7021	0.088738	1.7021	0.088738	15	14	0.093216		277	158	53
2931.8	3410.87	0.363497	250	185	80	1.09109	0.275234	1.09109	0.275234	15	14	0.289776		230	176	71	1.24059	0.214759	1.24059	0.214759	14	14	0.227321		238	197	92	0.567367	0.570466	0.567367	0.570466	15	14	0.590745		264	171	66	1.7021	0.088738	1.7021	0.088738	15	14	0.093216		277	158	53
2933.73	3408.63	0.363736	250	185	80	1.09109	0.275234	1.09109	0.275234	15	14	0.289776		231	175	70	1.28653	0.198257	1.28653	0.198257	14	14	0.209978		238	197	92	0.567367	0.570466	0.567367	0.570466	15	14	0.590745		264	171	66	1.7021	0.088738	1.7021	0.088738	15	14	0.093216		278	157	52
2935.66	3406.39	0.363975	249	186	81	1.04745	0.294895	1.04745	0.294895	15	14	0.310143		230	176	71	1.24059	0.214759	1.24059	0.214759	14	14	0.227321		238	197	92	0.567367	0.570466	0.567367	0.570466	15	14	0.590745		264	171	66	1.7021	0.088738	1.7021	0.088738	15	14	0.093216		278	157	52
2937.59	3404.15	0.364214	249	186	81	1.04745	0.294895	1.04745	0.294895	15	14	0.310143		231	175	70	1.28653	0.198257	1.28653	0.198257	14	14	0.209978		238	197	92	0.567367	0.570466	0.567367	0.570466	15	14	0.590745		264	171	66	1.7021	0.088738	1.7021	0.088738	15	14	0.093216		276	159	54
2939.52	3401.92	0.364453	248	187	82	1.0038	0.315475	1.0038	0.315475	15	14	0.331405		231	175	70	1.28653	0.198257	1.28653	0.198257	14	14	0.209978		238	197	92	0.567367	0.570466	0.567367	0.570466	15	14	0.590745		265	170	65	1.74574	0.080857	1.74574	0.080857	15	14	0.084761		276	159	54
2941.44	3399.69	0.364693	248	187	82	1.0038	0.315475	1.0038	0.315475	15	14	0.331405		231	175	70	1.28653	0.198257	1.28653	0.198257	14	14	0.209978		238	197	92	0.567367	0.570466	0.567367	0.570466	15	14	0.590745		264	171	66	1.7021	0.088738	1.7021	0.088738	15	14	0.093216		276	159	54
2943.37	3397.46	0.364932	249	186	81	1.04745	0.294895	1.04745	0.294895	15	14	0.310143		230	176	71	1.24059	0.214759	1.24059	0.214759	14	14	0.227321		238	197	92	0.567367	0.570466	0.567367	0.570466	15	14	0.590745		264	171	66	1.7021	0.088738	1.7021	0.088738	15	14	0.093216		276	159	54
2945.3	3395.24	0.365171	249	186	81	1.04745	0.294895	1.04745	0.294895	15	14	0.310143		230	176	71	1.24059	0.214759	1.24059	0.214759	14	14	0.227321		238	197	92	0.567367	0.570466	0.567367	0.570466	15	14	0.590745		266	169	64	1.78939	0.073553	1.78939	0.073553	15	14	0.076919		276	159	54
2947.23	3393.02	0.36541	250	185	80	1.09109	0.275234	1.09109	0.275234	15	14	0.289776		230	176	71	1.24059	0.214759	1.24059	0.214759	14	14	0.227321		238	197	92	0.567367	0.570466	0.567367	0.570466	15	14	0.590745		266	169	64	1.78939	0.073553	1.78939	0.073553	15	14	0.076919		275	160	55
2949.16	3390.8	0.365649	250	185	80	1.09109	0.275234	1.09109	0.275234	15	14	0.289776		230	176	71	1.24059	0.214759	1.24059	0.214759	14	14	0.227321		238	197	92	0.567367	0.570466	0.567367	0.570466	15	14	0.590745		266	169	64	1.78939	0.073553	1.78939	0.073553	15	14	0.076919		275	160	55
2951.09	3388.58	0.365888	250	185	80	1.09109	0.275234	1.09109	0.275234	15	14	0.289776		231	175	70	1.28653	0.198257	1.28653	0.198257	14	14	0.209978		237	198	93	0.523723	0.600472	0.523723	0.600472	15	14	0.620867		266	169	64	1.78939	0.073553	1.78939	0.073553	15	14	0.076919		276	159	54
2953.02	3386.37	0.366127	252	183	78	1.17838	0.238647	1.17838	0.238647	15	14	0.251712		229	177	72	1.19464	0.232229	1.19464	0.232229	14	14	0.24563		237	198	93	0.523723	0.600472	0.523723	0.600472	15	14	0.620867		266	169	64	1.78939	0.073553	1.78939	0.073553	15	14	0.076919		276	159	54
2954.95	3384.16	0.366367	254	181	76	1.26566	0.205634	1.26566	0.205634	15	14	0.217176		228	178	73	1.14869	0.250684	1.14869	0.250684	14	14	0.26491		238	197	92	0.567367	0.570466	0.567367	0.570466	15	14	0.590745		266	169	64	1.78939	0.073553	1.78939	0.073553	15	14	0.076919		276	159	54
2956.87	3381.95	0.366606	254	181	76	1.26566	0.205634	1.26566	0.205634	15	14	0.217176		228	178	73	1.14869	0.250684	1.14869	0.250684	14	14	0.26491		237	198	93	0.523723	0.600472	0.523723	0.600472	15	14	0.620867		266	169	64	1.78939	0.073553	1.78939	0.073553	15	14	0.076919		277	158	53
2958.8	3379.74	0.366845	254	181	76	1.26566	0.205634	1.26566	0.205634	15	14	0.217176		229	177	72	1.19464	0.232229	1.19464	0.232229	14	14	0.24563		237	198	93	0.523723	0.600472	0.523723	0.600472	15	14	0.620867		266	169	64	1.78939	0.073553	1.78939	0.073553	15	14	0.076919		277	158	53
2960.73	3377.54	0.367084	252	183	78	1.17838	0.238647	1.17838	0.238647	15	14	0.251712		229	177	72	1.19464	0.232229	1.19464	0.232229	14	14	0.24563		238	197	92	0.567367	0.570466	0.567367	0.570466	15	14	0.590745		265	170	65	1.74574	0.080857	1.74574	0.080857	15	14	0.084761		277	158	53
2962.66	3375.34	0.367323	252	183	78	1.17838	0.238647	1.17838	0.238647	15	14	0.251712		229	177	72	1.19464	0.232229	1.19464	0.232229	14	14	0.24563		238	197	92	0.567367	0.570466	0.567367	0.570466	15	14	0.590745		265	170	65	1.74574	0.080857	1.74574	0.080857	15	14	0.084761		277	158	53
2964.59	3373.15	0.367562	252	183	78	1.17838	0.238647	1.17838	0.238647	15	14	0.251712		229	177	72	1.19464	0.232229	1.19464	0.232229	14	14	0.24563		238	197	92	0.567367	0.570466	0.567367	0.570466	15	14	0.590745		266	169	64	1.78939	0.073553	1.78939	0.073553	15	14	0.076919		276	159	54
2966.52	3370.95	0.367801	252	183	78	1.17838	0.238647	1.17838	0.238647	15	14	0.251712		228	178	73	1.14869	0.250684	1.14869	0.250684	14	14	0.26491		238	197	92	0.567367	0.570466	0.567367	0.570466	15	14	0.590745		267	168	63	1.83303	0.066799	1.83303	0.066799	15	14	0.069659		277	158	53
2968.45	3368.76	0.368041	253	182	77	1.22202	0.221701	1.22202	0.221701	15	14	0.234007		228	178	73	1.14869	0.250684	1.14869	0.250684	14	14	0.26491		239	196	91	0.61101	0.541193	0.61101	0.541193	15	14	0.561291		267	168	63	1.83303	0.066799	1.83303	0.066799	15	14	0.069659		277	158	53
2970.38	3366.58	0.36828	255	180	75	1.30931	0.190431	1.30931	0.190431	15	14	0.201205		229	177	72	1.19464	0.232229	1.19464	0.232229	14	14	0.24563		238	197	92	0.567367	0.570466	0.567367	0.570466	15	14	0.590745		267	168	63	1.83303	0.066799	1.83303	0.066799	15	14	0.069659		277	158	53
2972.31	3364.39	0.368519	255	180	75	1.30931	0.190431	1.30931	0.190431	15	14	0.201205		229	177	72	1.19464	0.232229	1.19464	0.232229	14	14	0.24563		238	197	92	0.567367	0.570466	0.567367	0.570466	15	14	0.590745		267	168	63	1.83303	0.066799	1.83303	0.066799	15	14	0.069659		277	158	53
2974.23	3362.21	0.368758	256	179	74	1.35295	0.176072	1.35295	0.176072	15	14	0.186083		230	176	71	1.24059	0.214759	1.24059	0.214759	14	14	0.227321		240	195	90	0.654654	0.512691	0.654654	0.512691	15	14	0.532545		267	168	63	1.83303	0.066799	1.83303	0.066799	15	14	0.069659		277	158	53
2976.16	3360.03	0.368997	256	179	74	1.35295	0.176072	1.35295	0.176072	15	14	0.186083		229	177	72	1.19464	0.232229	1.19464	0.232229	14	14	0.24563		240	195	90	0.654654	0.512691	0.654654	0.512691	15	14	0.532545		267	168	63	1.83303	0.066799	1.83303	0.066799	15	14	0.069659		277	158	53
2978.09	3357.85	0.369236	256	179	74	1.35295	0.176072	1.35295	0.176072	15	14	0.186083		229	177	72	1.19464	0.232229	1.19464	0.232229	14	14	0.24563		240	195	90	0.654654	0.512691	0.654654	0.512691	15	14	0.532545		268	167	62	1.87667	0.060564	1.87667	0.060564	15	14	0.062953		277	158	53
2980.02	3355.68	0.369475	255	180	75	1.30931	0.190431	1.30931	0.190431	15	14	0.201205		229	177	72	1.19464	0.232229	1.19464	0.232229	14	14	0.24563		240	195	90	0.654654	0.512691	0.654654	0.512691	15	14	0.532545		267	168	63	1.83303	0.066799	1.83303	0.066799	15	14	0.069659		277	158	53
2981.95	3353.51	0.369715	255	180	75	1.30931	0.190431	1.30931	0.190431	15	14	0.201205		228	178	73	1.14869	0.250684	1.14869	0.250684	14	14	0.26491		241	194	89	0.698297	0.484992	0.698297	0.484992	15	14	0.504539		267	168	63	1.83303	0.066799	1.83303	0.066799	15	14	0.069659		276	159	54
2983.88	3351.34	0.369954	255	180	75	1.30931	0.190431	1.30931	0.190431	15	14	0.201205		228	178	73	1.14869	0.250684	1.14869	0.250684	14	14	0.26491		241	194	89	0.698297	0.484992	0.698297	0.484992	15	14	0.504539		267	168	63	1.83303	0.066799	1.83303	0.066799	15	14	0.069659		276	159	54
2985.81	3349.18	0.370193	257	178	73	1.39659	0.162537	1.39659	0.162537	15	14	0.171789		228	178	73	1.14869	0.250684	1.14869	0.250684	14	14	0.26491		242	193	88	0.741941	0.458124	0.741941	0.458124	15	14	0.477307		267	168	63	1.83303	0.066799	1.83303	0.066799	15	14	0.069659		276	159	54
2987.74	3347.02	0.370432	257	178	73	1.39659	0.162537	1.39659	0.162537	15	14	0.171789		228	178	73	1.14869	0.250684	1.14869	0.250684	14	14	0.26491		242	193	88	0.741941	0.458124	0.741941	0.458124	15	14	0.477307		267	168	63	1.83303	0.066799	1.83303	0.066799	15	14	0.069659		276	159	54
2989.66	3344.86	0.370671	259	176	71	1.48388	0.137841	1.48388	0.137841	15	14	0.145619		228	178	73	1.14869	0.250684	1.14869	0.250684	14	14	0.26491		242	193	88	0.741941	0.458124	0.741941	0.458124	15	14	0.477307		267	168	63	1.83303	0.066799	1.83303	0.066799	15	14	0.069659		276	159	54
2991.59	3342.7	0.37091	260	175	70	1.52753	0.126631	1.52753	0.126631	15	14	0.1337		229	177	72	1.19464	0.232229	1.19464	0.232229	14	14	0.24563		243	192	87	0.785584	0.432112	0.785584	0.432112	15	14	0.450872		266	169	64	1.78939	0.073553	1.78939	0.073553	15	14	0.076919		275	160	55
2993.52	3340.55	0.371149	260	175	70	1.52753	0.126631	1.52753	0.126631	15	14	0.1337		229	177	72	1.19464	0.232229	1.19464	0.232229	14	14	0.24563		243	192	87	0.785584	0.432112	0.785584	0.432112	15	14	0.450872		266	169	64	1.78939	0.073553	1.78939	0.073553	15	14	0.076919		275	160	55
2995.45	3338.4	0.371389	260	175	70	1.52753	0.126631	1.52753	0.126631	15	14	0.1337		229	177	72	1.19464	0.232229	1.19464	0.232229	14	14	0.24563		242	193	88	0.741941	0.458124	0.741941	0.458124	15	14	0.477307		267	168	63	1.83303	0.066799	1.83303	0.066799	15	14	0.069659		275	160	55
2997.38	3336.25	0.371628	260	175	70	1.52753	0.126631	1.52753	0.126631	15	14	0.1337		230	176	71	1.24059	0.214759	1.24059	0.214759	14	14	0.227321		242	193	88	0.741941	0.458124	0.741941	0.458124	15	14	0.477307		267	168	63	1.83303	0.066799	1.83303	0.066799	15	14	0.069659		275	160	55
2999.31	3334.1	0.371867	260	175	70	1.52753	0.126631	1.52753	0.126631	15	14	0.1337		230	176	71	1.24059	0.214759	1.24059	0.214759	14	14	0.227321		242	193	88	0.741941	0.458124	0.741941	0.458124	15	14	0.477307		269	166	61	1.92032	0.054819	1.92032	0.054819	15	14	0.056773		275	160	55
3001.24	3331.96	0.372106	260	175	70	1.52753	0.126631	1.52753	0.126631	15	14	0.1337		231	175	70	1.28653	0.198257	1.28653	0.198257	14	14	0.209978		241	194	89	0.698297	0.484992	0.698297	0.484992	15	14	0.504539		270	165	60	1.96396	0.049535	1.96396	0.049535	15	14	0.05109		275	160	55
3003.17	3329.82	0.372345	260	175	70	1.52753	0.126631	1.52753	0.126631	15	14	0.1337		231	175	70	1.28653	0.198257	1.28653	0.198257	14	14	0.209978		241	194	89	0.698297	0.484992	0.698297	0.484992	15	14	0.504539		270	165	60	1.96396	0.049535	1.96396	0.049535	15	14	0.05109		275	160	55
3005.1	3327.68	0.372584	260	175	70	1.52753	0.126631	1.52753	0.126631	15	14	0.1337		231	175	70	1.28653	0.198257	1.28653	0.198257	14	14	0.209978		240	195	90	0.654654	0.512691	0.654654	0.512691	15	14	0.532545		270	165	60	1.96396	0.049535	1.96396	0.049535	15	14	0.05109		275	160	55
3007.02	3325.55	0.372823	260	175	70	1.52753	0.126631	1.52753	0.126631	15	14	0.1337		230	176	71	1.24059	0.214759	1.24059	0.214759	14	14	0.227321		239	196	91	0.61101	0.541193	0.61101	0.541193	15	14	0.561291		270	165	60	1.96396	0.049535	1.96396	0.049535	15	14	0.05109		276	159	54
3008.95	3323.42	0.373063	257	178	73	1.39659	0.162537	1.39659	0.162537	15	14	0.171789		229	177	72	1.19464	0.232229	1.19464	0.232229	14	14	0.24563		238	197	92	0.567367	0.570466	0.567367	0.570466	15	14	0.590745		269	166	61	1.92032	0.054819	1.92032	0.054819	15	14	0.056773		275	160	55
3010.88	3321.29	0.373302	256	179	74	1.35295	0.176072	1.35295	0.176072	15	14	0.186083		230	176	71	1.24059	0.214759	1.24059	0.214759	14	14	0.227321		236	199	94	0.480079	0.631171	0.480079	0.631171	15	14	0.651619		268	167	62	1.87667	0.060564	1.87667	0.060564	15	14	0.062953		274	161	56
3012.81	3319.16	0.373541	255	180	75	1.30931	0.190431	1.30931	0.190431	15	14	0.201205		230	176	71	1.24059	0.214759	1.24059	0.214759	14	14	0.227321		236	199	94	0.480079	0.631171	0.480079	0.631171	15	14	0.651619		267	168	63	1.83303	0.066799	1.83303	0.066799	15	14	0.069659		273	162	57
3014.74	3317.04	0.37378	255	180	75	1.30931	0.190431	1.30931	0.190431	15	14	0.201205		229	177	72	1.19464	0.232229	1.19464	0.232229	14	14	0.24563		234	201	96	0.392792	0.694473	0.392792	0.694473	15	14	0.71483		266	169	64	1.78939	0.073553	1.78939	0.073553	15	14	0.076919		274	161	56
3016.67	3314.92	0.374019	252	183	78	1.17838	0.238647	1.17838	0.238647	15	14	0.251712		228	178	73	1.14869	0.250684	1.14869	0.250684	14	14	0.26491		233	202	97	0.349149	0.726978	0.349149	0.726978	15	14	0.747192		268	167	62	1.87667	0.060564	1.87667	0.060564	15	14	0.062953		272	163	58
3018.6	3312.8	0.374258	251	184	79	1.13473	0.256488	1.13473	0.256488	15	14	0.270299		226	180	75	1.0568	0.290605	1.0568	0.290605	14	14	0.306426		233	202	97	0.349149	0.726978	0.349149	0.726978	15	14	0.747192		267	168	63	1.83303	0.066799	1.83303	0.066799	15	14	0.069659		273	162	57
3020.53	3310.68	0.374497	252	183	78	1.17838	0.238647	1.17838	0.238647	15	14	0.251712		225	181	76	1.01085	0.312089	1.01085	0.312089	14	14	0.328667		233	202	97	0.349149	0.726978	0.349149	0.726978	15	14	0.747192		267	168	63	1.83303	0.066799	1.83303	0.066799	15	14	0.069659		271	164	59
3022.45	3308.57	0.374737	253	182	77	1.22202	0.221701	1.22202	0.221701	15	14	0.234007		221	185	80	0.82706	0.408205	0.82706	0.408205	14	14	0.427387		232	203	98	0.30551	0.759982	0.30551	0.759982	15	14	0.779995		261	174	69	1.57117	0.116144	1.57117	0.116144	15	14	0.122524		268	167	62
3024.38	3306.46	0.374976	246	189	84	0.91652	0.359397	0.91652	0.359397	15	14	0.376588		220	186	81	0.78111	0.434738	0.78111	0.434738	14	14	0.454438		227	208	103	0.08729	0.930443	0.08729	0.930443	15	14	0.948623		259	176	71	1.48388	0.137841	1.48388	0.137841	15	14	0.145619		266	169	64
3026.31	3304.35	0.375215	245	190	85	0.87287	0.382734	0.87287	0.382734	15	14	0.400494		220	186	81	0.78111	0.434738	0.78111	0.434738	14	14	0.454438		224	211	104	-0.04364	0.965189	-0.04364	0.965189	15	14	0.982865		255	180	75	1.30931	0.190431	1.30931	0.190431	15	14	0.201205		260	175	70
3028.24	3302.25	0.375454	246	189	84	0.91652	0.359397	0.91652	0.359397	15	14	0.376588		221	185	80	0.82706	0.408205	0.82706	0.408205	14	14	0.427387		227	208	103	0.08729	0.930443	0.08729	0.930443	15	14	0.948623		259	176	71	1.48388	0.137841	1.48388	0.137841	15	14	0.145619		260	175	70
3030.17	3300.14	0.375693	246	189	84	0.91652	0.359397	0.91652	0.359397	15	14	0.376588		222	184	79	0.87301	0.382661	0.87301	0.382661	14	14	0.401263		225	210	105	0	1	0	1	15	14	1.01713		256	179	74	1.35295	0.176072	1.35295	0.176072	15	14	0.186083		261	174	69
3032.1	3298.05	0.375932	246	189	84	0.91652	0.359397	0.91652	0.359397	15	14	0.376588		221	185	80	0.82706	0.408205	0.82706	0.408205	14	14	0.427387		223	212	103	-0.08729	0.930443	-0.08729	0.930443	15	14	0.948623		255	180	75	1.30931	0.190431	1.30931	0.190431	15	14	0.201205		259	176	71
3034.03	3295.95	0.376171	243	192	87	0.78558	0.432112	0.78558	0.432112	15	14	0.450872		220	186	81	0.78111	0.434738	0.78111	0.434738	14	14	0.454438		224	211	104	-0.04364	0.965189	-0.04364	0.965189	15	14	0.982865		255	180	75	1.30931	0.190431	1.30931	0.190431	15	14	0.201205		259	176	71
3035.96	3293.85	0.376411	245	190	85	0.87287	0.382734	0.87287	0.382734	15	14	0.400494		221	185	80	0.82706	0.408205	0.82706	0.408205	14	14	0.427387		223	212	103	-0.08729	0.930443	-0.08729	0.930443	15	14	0.948623		253	182	77	1.22202	0.221701	1.22202	0.221701	15	14	0.234007		259	176	71
3037.89	3291.76	0.37665	245	190	85	0.87287	0.382734	0.87287	0.382734	15	14	0.400494		220	186	81	0.78111	0.434738	0.78111	0.434738	14	14	0.454438		222	213	102	-0.13093	0.89583	-0.13093	0.89583	15	14	0.914475		255	180	75	1.30931	0.190431	1.30931	0.190431	15	14	0.201205		260	175	70
3039.81	3289.67	0.376889	244	191	86	0.82923	0.406976	0.82923	0.406976	15	14	0.425262		221	185	80	0.82706	0.408205	0.82706	0.408205	14	14	0.427387		222	213	102	-0.13093	0.89583	-0.13093	0.89583	15	14	0.914475		259	176	71	1.48388	0.137841	1.48388	0.137841	15	14	0.145619		259	176	71
3041.74	3287.59	0.377128	244	191	86	0.82923	0.406976	0.82923	0.406976	15	14	0.425262		221	185	80	0.82706	0.408205	0.82706	0.408205	14	14	0.427387		226	209	104	0.04364	0.965189	0.04364	0.965189	15	14	0.982865		258	177	72	1.44024	0.149801	1.44024	0.149801	15	14	0.158309		257	178	73
3043.67	3285.51	0.377367	243	192	87	0.78558	0.432112	0.78558	0.432112	15	14	0.450872		221	185	80	0.82706	0.408205	0.82706	0.408205	14	14	0.427387		228	207	102	0.13093	0.89583	0.13093	0.89583	15	14	0.914475		258	177	72	1.44024	0.149801	1.44024	0.149801	15	14	0.158309		254	181	76
3045.6	3283.42	0.377606	246	189	84	0.91652	0.359397	0.91652	0.359397	15	14	0.376588		221	185	80	0.82706	0.408205	0.82706	0.408205	14	14	0.427387		224	211	104	-0.04364	0.965189	-0.04364	0.965189	15	14	0.982865		257	178	73	1.39659	0.162537	1.39659	0.162537	15	14	0.171789		251	184	79
3047.53	3281.35	0.377845	245	190	85	0.87287	0.382734	0.87287	0.382734	15	14	0.400494		221	185	80	0.82706	0.408205	0.82706	0.408205	14	14	0.427387		227	208	103	0.08729	0.930443	0.08729	0.930443	15	14	0.948623		255	180	75	1.30931	0.190431	1.30931	0.190431	15	14	0.201205		249	186	81
3049.46	3279.27	0.378085	244	191	86	0.82923	0.406976	0.82923	0.406976	15	14	0.425262		218	188	83	0.68922	0.490688	0.68922	0.490688	14	14	0.511239		230	205	100	0.21822	0.827259	0.21822	0.827259	15	14	0.846694		253	182	77	1.22202	0.221701	1.22202	0.221701	15	14	0.234007		253	182	77
3051.39	3277.2	0.378324	245	190	85	0.87287	0.382734	0.87287	0.382734	15	14	0.400494		219	187	82	0.73516	0.462241	0.73516	0.462241	14	14	0.482401		233	202	97	0.34915	0.726978	0.34915	0.726978	15	14	0.747192		253	182	77	1.22202	0.221701	1.22202	0.221701	15	14	0.234007		252	183	78
3053.32	3275.13	0.378563	241	194	89	0.6983	0.484992	0.6983	0.484992	15	14	0.504539		219	187	82	0.73516	0.462241	0.73516	0.462241	14	14	0.482401		233	202	97	0.34915	0.726978	0.34915	0.726978	15	14	0.747192		251	184	79	1.13473	0.256488	1.13473	0.256488	15	14	0.270299		253	182	77
3055.24	3273.06	0.378802	238	197	92	0.56737	0.570466	0.56737	0.570466	15	14	0.590745		220	186	81	0.78111	0.434738	0.78111	0.434738	14	14	0.454438		236	199	94	0.48008	0.631171	0.48008	0.631171	15	14	0.651619		252	183	78	1.17838	0.238647	1.17838	0.238647	15	14	0.251712		253	182	77
3057.17	3271	0.379041	238	197	92	0.56737	0.570466	0.56737	0.570466	15	14	0.590745		221	185	80	0.82706	0.408205	0.82706	0.408205	14	14	0.427387		247	188	83	0.96016	0.336976	0.96016	0.336976	15	14	0.353554		251	184	79	1.13473	0.256488	1.13473	0.256488	15	14	0.270299		263	172	67
3059.1	3268.93	0.37928	243	192	87	0.78558	0.432112	0.78558	0.432112	15	14	0.450872		220	186	81	0.78111	0.434738	0.78111	0.434738	14	14	0.454438		250	185	80	1.09109	0.275234	1.09109	0.275234	15	14	0.289776		258	177	72	1.44024	0.149801	1.44024	0.149801	15	14	0.158309		269	166	61
3061.03	3266.87	0.379519	235	200	95	0.43644	0.662521	0.43644	0.662521	15	14	0.682954		193	213	88	-0.45948	0.645892	-0.45948	0.645892	14	14	0.667331		227	208	103	0.08729	0.930443	0.08729	0.930443	15	14	0.948623		262	173	68	1.61481	0.106352	1.61481	0.106352	15	14	0.11207		264	171	66
3062.96	3264.82	0.379759	204	231	84	-0.91652	0.359397	-0.91652	0.359397	15	14	0.376588		176	230	71	-1.24059	0.214759	-1.24059	0.214759	14	14	0.227321		201	234	81	-1.04745	0.294895	-1.04745	0.294895	15	14	0.310143		222	213	102	-0.130931	0.89583	-0.130931	0.89583	15	14	0.914475		211	224	91
3064.89	3262.76	0.379998	194	241	74	-1.35295	0.176072	-1.35295	0.176072	15	14	0.186083		188	218	83	-0.68922	0.490688	-0.68922	0.490688	14	14	0.511239		199	236	79	-1.13473	0.256488	-1.13473	0.256488	15	14	0.270299		214	221	94	-0.480079	0.631171	-0.480079	0.631171	15	14	0.651619		188	247	68
3066.82	3260.71	0.380237	195	240	75	-1.30931	0.190431	-1.30931	0.190431	15	14	0.201205		192	214	87	-0.50542	0.613261	-0.50542	0.613261	14	14	0.634669		205	230	85	-0.87287	0.382734	-0.87287	0.382734	15	14	0.400494		221	214	101	-0.174574	0.861414	-0.174574	0.861414	15	14	0.880478		189	246	69
3068.75	3258.66	0.380476	198	237	78	-1.17838	0.238647	-1.17838	0.238647	15	14	0.251712		196	210	91	-0.32163	0.74773	-0.32163	0.74773	14	14	0.768812		211	224	91	-0.61101	0.541193	-0.61101	0.541193	15	14	0.561291		226	209	104	0.043644	0.965189	0.043644	0.965189	15	14	0.982865		198	237	78
3070.68	3256.61	0.380715	195	240	75	-1.30931	0.190431	-1.30931	0.190431	15	14	0.201205		193	213	88	-0.459477	0.645892	-0.459477	0.645892	14	14	0.667331		207	228	87	-0.785584	0.432112	-0.785584	0.432112	15	14	0.450872		218	217	98	-0.305505	0.759982	-0.305505	0.759982	15	14	0.779995		204	231	84
3072.6	3254.57	0.380954	197	238	77	-1.22202	0.221701	-1.22202	0.221701	15	14	0.234007		190	216	85	-0.59732	0.550294	-0.59732	0.550294	14	14	0.57142		207	228	87	-0.785584	0.432112	-0.785584	0.432112	15	14	0.450872		215	220	95	-0.436436	0.662521	-0.436436	0.662521	15	14	0.682954		205	230	85
3074.53	3252.53	0.381193	196	239	76	-1.26566	0.205634	-1.26566	0.205634	15	14	0.217176		193	213	88	-0.459477	0.645892	-0.459477	0.645892	14	14	0.667331		213	222	93	-0.523723	0.600472	-0.523723	0.600472	15	14	0.620867		220	215	100	-0.218218	0.827259	-0.218218	0.827259	15	14	0.846694		204	231	84
3076.46	3250.49	0.381433	203	232	83	-0.96016	0.336976	-0.96016	0.336976	15	14	0.353554		196	210	91	-0.321634	0.74773	-0.321634	0.74773	14	14	0.768812		212	223	92	-0.567367	0.570466	-0.567367	0.570466	15	14	0.590745		221	214	101	-0.174574	0.861414	-0.174574	0.861414	15	14	0.880478		210	225	90
3078.39	3248.45	0.381672	209	226	89	-0.6983	0.484992	-0.6983	0.484992	15	14	0.504539		199	207	94	-0.183791	0.854178	-0.183791	0.854178	14	14	0.874287		211	224	91	-0.61101	0.541193	-0.61101	0.541193	15	14	0.561291		219	216	99	-0.261861	0.793428	-0.261861	0.793428	15	14	0.813179		205	230	85
3080.32	3246.42	0.381911	211	224	91	-0.61101	0.541193	-0.61101	0.541193	15	14	0.561291		189	217	84	-0.643268	0.520051	-0.643268	0.520051	14	14	0.540927		210	225	90	-0.654654	0.512691	-0.654654	0.512691	15	14	0.532545		218	217	98	-0.305505	0.759982	-0.305505	0.759982	15	14	0.779995		204	231	84
3082.25	3244.39	0.38215	209	226	89	-0.6983	0.484992	-0.6983	0.484992	15	14	0.504539		192	214	87	-0.505424	0.613261	-0.505424	0.613261	14	14	0.634669		211	224	91	-0.61101	0.541193	-0.61101	0.541193	15	14	0.561291		217	218	97	-0.349149	0.726978	-0.349149	0.726978	15	14	0.747192		205	230	85
3084.18	3242.36	0.382389	209	226	89	-0.6983	0.484992	-0.6983	0.484992	15	14	0.504539		199	207	94	-0.183791	0.854178	-0.183791	0.854178	14	14	0.874287		210	225	90	-0.654654	0.512691	-0.654654	0.512691	15	14	0.532545		218	217	98	-0.305505	0.759982	-0.305505	0.759982	15	14	0.779995		204	231	84
3086.11	3240.33	0.382628	221	214	101	-0.17457	0.861414	-0.17457	0.861414	15	14	0.880478		206	200	95	0.137843	0.890365	0.137843	0.890365	14	14	0.910026		215	220	95	-0.436436	0.662521	-0.436436	0.662521	15	14	0.682954		227	208	103	0.087287	0.930443	0.087287	0.930443	15	14	0.948623		213	222	93
3088.03	3238.31	0.382867	228	207	102	0.13093	0.89583	0.13093	0.89583	15	14	0.914475		208	198	93	0.229738	0.818295	0.229738	0.818295	14	14	0.83879		228	207	102	0.130931	0.89583	0.130931	0.89583	15	14	0.914475		238	197	92	0.567367	0.570466	0.567367	0.570466	15	14	0.590745		223	212	103
3089.96	3236.28	0.383107	223	212	103	-0.08729	0.930443	-0.08729	0.930443	15	14	0.948623		215	191	86	0.551372	0.581379	0.551372	0.581379	14	14	0.602685		224	211	104	-0.043644	0.965189	-0.043644	0.965189	15	14	0.982865		232	203	98	0.305505	0.759982	0.305505	0.759982	15	14	0.779995		224	211	104
3091.89	3234.27	0.383346	220	215	100	-0.21822	0.827259	-0.21822	0.827259	15	14	0.846694		216	190	85	0.59732	0.550294	0.59732	0.550294	14	14	0.57142		229	206	101	0.174574	0.861414	0.174574	0.861414	15	14	0.880478		225	210	105	0	1	0	1	15	14	1.01713		224	211	104
3093.82	3232.25	0.383585	219	216	99	-0.26186	0.793428	-0.26186	0.793428	15	14	0.813179		223	183	78	0.918954	0.358121	0.918954	0.358121	14	14	0.376095		238	197	92	0.567367	0.570466	0.567367	0.570466	15	14	0.590745		228	207	102	0.130931	0.89583	0.130931	0.89583	15	14	0.914475		225	210	105
3095.75	3230.24	0.383824	213	222	93	-0.52372	0.600472	-0.52372	0.600472	15	14	0.620867		221	185	80	0.827058	0.408205	0.827058	0.408205	14	14	0.427387		241	194	89	0.698297	0.484992	0.698297	0.484992	15	14	0.504539		227	208	103	0.087287	0.930443	0.087287	0.930443	15	14	0.948623		221	214	101
3097.68	3228.22	0.384063	219	216	99	-0.26186	0.793428	-0.26186	0.793428	15	14	0.813179		219	187	82	0.735163	0.462241	0.735163	0.462241	14	14	0.482401		237	198	93	0.523723	0.600472	0.523723	0.600472	15	14	0.620867		233	202	97	0.349149	0.726978	0.349149	0.726978	15	14	0.747192		220	215	100
3099.61	3226.22	0.384302	229	206	101	0.17457	0.861414	0.17457	0.861414	15	14	0.880478		223	183	78	0.918954	0.358121	0.918954	0.358121	14	14	0.376095		245	190	85	0.872872	0.382734	0.872872	0.382734	15	14	0.400494		250	185	80	1.09109	0.275234	1.09109	0.275234	15	14	0.289776		236	199	94
3101.54	3224.21	0.384541	230	205	100	0.21822	0.827259	0.21822	0.827259	15	14	0.846694		222	184	79	0.873006	0.382661	0.873006	0.382661	14	14	0.401263		240	195	90	0.654654	0.512691	0.654654	0.512691	15	14	0.532545		247	188	83	0.960159	0.336976	0.960159	0.336976	15	14	0.353554		245	190	85
[truncated: 85 more columns]

## Sheet: Лист1
WL, см-1	WL, nm	эВ		Rank Sum	Rank Sum	U	Z	p-level	Z	p-level	Valid N	Valid N	2*1sided			Rank Sum	Rank Sum	U	Z	p-level	Z	p-level	Valid N	Valid N	2*1sided			Rank Sum	Rank Sum	U	Z	p-level	Z	p-level	Valid N	Valid N	2*1sided
				1 (whole set of preparations)	2 (hc)											1 (whole set of preparations)	3 (K)											2	3
948.977	10537.7	0.117658	V3000	3474	442	337	2.06488	0.0389354	2.06488	0.0389354	74	14	0.0385296		V3000	3175	480	400	-0.0916489	0.926977	-0.0916489	0.926977	74	11	0.933125		V3000	152	173	47	-1.64235	0.100519	-1.64235	0.100519	14	11	0.107208
950.906	10516.3	0.117897	V2999_5	3399	517	412	1.20927	0.226562	1.20927	0.226562	74	14	0.231503		V2999_5	3198	457	391	0.209483	0.834071	0.209483	0.834071	74	11	0.841378		V2999_5	178	147	73	-0.21898	0.826666	-0.21898	0.826666	14	11	0.850813
952.835	10495	0.118136	V2999	3410	506	401	1.33476	0.181957	1.33476	0.181957	74	14	0.185897		V2999	3225	430	364	0.562986	0.573445	0.562986	0.573445	74	11	0.582723		V2999	174	151	69	-0.437959	0.661416	-0.437959	0.661416	14	11	0.686695
954.764	10473.8	0.118376	V2998_5	3294	622	517	0.0114082	0.990898	0.0114082	0.990898	74	14	0.995499		V2998_5	3218	437	371	0.471337	0.6374	0.471337	0.6374	74	11	0.64643		V2998_5	191	134	68	0.492704	0.622222	0.492704	0.622222	14	11	0.647494
956.693	10452.7	0.118615	V2998	3384	532	427	1.03814	0.299204	1.03814	0.299204	74	14	0.305397		V2998	3212	443	377	0.392781	0.694482	0.392781	0.694482	74	11	0.703143		V2998	181	144	76	-0.0547449	0.956342	-0.0547449	0.956342	14	11	0.978572
958.622	10431.6	0.118854	V2997_5	3390	526	421	1.10659	0.268471	1.10659	0.268471	74	14	0.274189		V2997_5	3179	476	404	-0.0392781	0.968669	-0.0392781	0.968669	74	11	0.974254		V2997_5	161	164	56	-1.14964	0.250292	-1.14964	0.250292	14	11	0.267086
960.55	10410.7	0.119093	V2997	3314	602	497	0.239571	0.810663	0.239571	0.810663	74	14	0.817071		V2997	3129	526	354	-0.693913	0.487737	-0.693913	0.487737	74	11	0.49702		V2997	169	156	64	-0.711684	0.476661	-0.711684	0.476661	14	11	0.500669
962.479	10389.8	0.119332	V2996_5	3258	658	483	-0.399286	0.689683	-0.399286	0.689683	74	14	0.696961		V2996_5	3269	386	320	1.13906	0.254677	1.13906	0.254677	74	11	0.261345		V2996_5	205	120	54	1.25913	0.207983	1.25913	0.207983	14	11	0.222452
964.408	10369.1	0.119571	V2996	3206	710	431	-0.99251	0.320949	-0.99251	0.320949	74	14	0.327434		V2996	3138	517	363	-0.576079	0.564562	-0.576079	0.564562	74	11	0.573859		V2996	186	139	73	0.21898	0.826666	0.21898	0.826666	14	11	0.850813
966.337	10348.4	0.11981	V2995_5	3198	718	423	-1.08378	0.278465	-1.08378	0.278465	74	14	0.284346		V2995_5	3215	440	374	0.432059	0.665699	0.432059	0.665699	74	11	0.674562		V2995_5	199	126	60	0.930663	0.352029	0.930663	0.352029	14	11	0.373029
968.266	10327.7	0.12005	V2995	3227	689	452	-0.752939	0.451487	-0.752939	0.451487	74	14	0.459043		V2995	3182	473	407	0	1	0	1	74	11	1.00515		V2995	186	139	73	0.21898	0.826666	0.21898	0.826666	14	11	0.850813
970.194	10307.2	0.120289	V2994_5	3360	556	451	0.764347	0.444661	0.764347	0.444661	74	14	0.452187		V2994_5	3252	403	337	0.916489	0.359411	0.916489	0.359411	74	11	0.367815		V2994_5	185	140	74	0.164235	0.869547	0.164235	0.869547	14	11	0.893146
972.123	10286.8	0.120528	V2994	3297	619	514	0.0456327	0.963603	0.0456327	0.963603	74	14	0.968504		V2994	3303	352	286	1.58422	0.113145	1.58422	0.113145	74	11	0.115558		V2994	203	122	56	1.14964	0.250292	1.14964	0.250292	14	11	0.267086
974.052	10266.4	0.120767	V2993_5	3351	565	460	0.661673	0.508181	0.661673	0.508181	74	14	0.515894		V2993_5	3341	314	248	2.08174	0.0373671	2.08174	0.0373671	74	11	0.0367261		V2993_5	207	118	52	1.36862	0.171118	1.36862	0.171118	14	11	0.183239
975.981	10246.1	0.121006	V2993	3335	581	476	0.479143	0.631837	0.479143	0.631837	74	14	0.639387		V2993	3355	300	234	2.26504	0.0235111	2.26504	0.0235111	74	11	0.0224466		V2993	209	116	50	1.47811	0.139379	1.47811	0.139379	14	11	0.149216
977.91	10225.9	0.121245	V2992_5	3367	549	444	0.844204	0.398556	0.844204	0.398556	74	14	0.405807		V2992_5	3322	333	267	1.83298	0.0668068	1.83298	0.0668068	74	11	0.0673385		V2992_5	203	122	56	1.14964	0.250292	1.14964	0.250292	14	11	0.267086
979.839	10205.8	0.121484	V2992	3309	607	502	0.182531	0.855166	0.182531	0.855166	74	14	0.861173		V2992	3301	354	288	1.55803	0.119227	1.55803	0.119227	74	11	0.121872		V2992	204	121	55	1.20439	0.228441	1.20439	0.228441	14	11	0.244077
981.767	10185.7	0.121724	V2991_5	3411	505	400	1.34616	0.178251	1.34616	0.178251	74	14	0.182099		V2991_5	3299	356	290	1.53185	0.125561	1.53185	0.125561	74	11	0.128445		V2991_5	187	138	72	0.273724	0.784297	0.273724	0.784297	14	11	0.808899
983.696	10165.7	0.121963	V2991	3424	492	387	1.49447	0.135054	1.49447	0.135054	74	14	0.137732		V2991	3339	316	250	2.05555	0.0398263	2.05555	0.0398263	74	11	0.0392747		V2991	193	132	66	0.602194	0.547046	0.602194	0.547046	14	11	0.571924
985.625	10145.8	0.122202	V2990_5	3382	534	429	1.01533	0.309951	1.01533	0.309951	74	14	0.316292		V2990_5	3331	324	258	1.95081	0.0510803	1.95081	0.0510803	74	11	0.0509651		V2990_5	201	124	58	1.04015	0.29827	1.04015	0.29827	14	11	0.317273
987.554	10126	0.122441	V2990	3397	519	414	1.18645	0.235446	1.18645	0.235446	74	14	0.240565		V2990	3292	363	297	1.4402	0.149813	1.4402	0.149813	74	11	0.153562		V2990	190	135	69	0.437959	0.661416	0.437959	0.661416	14	11	0.686695
989.483	10106.3	0.12268	V2989_5	3390	526	421	1.10659	0.268471	1.10659	0.268471	74	14	0.274189		V2989_5	3265	390	324	1.08669	0.277173	1.08669	0.277173	74	11	0.284305		V2989_5	189	136	70	0.383214	0.701561	0.383214	0.701561	14	11	0.726735
991.411	10086.6	0.122919	V2989	3382	534	429	1.01533	0.309951	1.01533	0.309951	74	14	0.316292		V2989	3290	365	299	1.41401	0.157359	1.41401	0.157359	74	11	0.161363		V2989	192	133	67	0.547449	0.584071	0.547449	0.584071	14	11	0.609202
993.34	10067	0.123158	V2988_5	3430	486	381	1.56292	0.118073	1.56292	0.118073	74	14	0.120241		V2988_5	3289	366	300	1.40092	0.161239	1.40092	0.161239	74	11	0.165371		V2988_5	187	138	72	0.273724	0.784297	0.273724	0.784297	14	11	0.808899
995.269	10047.5	0.123398	V2988	3441	475	370	1.68841	0.0913339	1.68841	0.0913339	74	14	0.0926495		V2988	3278	377	311	1.2569	0.208791	1.2569	0.208791	74	11	0.214343		V2988	184	141	75	0.10949	0.912814	0.10949	0.912814	14	11	0.935765
997.198	10028.1	0.123637	V2987_5	3415	501	396	1.3918	0.163985	1.3918	0.163985	74	14	0.167467		V2987_5	3276	379	313	1.23071	0.218431	1.23071	0.218431	74	11	0.224237		V2987_5	189	136	70	0.383214	0.701561	0.383214	0.701561	14	11	0.726735
999.127	10008.7	0.123876	V2987	3412	504	399	1.35757	0.174601	1.35757	0.174601	74	14	0.178357		V2987	3267	388	322	1.11288	0.265761	1.11288	0.265761	74	11	0.272664		V2987	186	139	73	0.21898	0.826666	0.21898	0.826666	14	11	0.850813
1001.06	9989.46	0.124115	V2986_5	3448	468	363	1.76827	0.0770175	1.76827	0.0770175	74	14	0.0778571		V2986_5	3279	376	310	1.26999	0.204088	1.26999	0.204088	74	11	0.209512		V2986_5	182	143	77	0	1	0	1	14	11	1.02143
1002.98	9970.25	0.124354	V2986	3446	470	365	1.74545	0.0809077	1.74545	0.0809077	74	14	0.0818775		V2986	3276	379	313	1.23071	0.218431	1.23071	0.218431	74	11	0.224237		V2986	186	139	73	0.21898	0.826666	0.21898	0.826666	14	11	0.850813
1004.91	9951.11	0.124593	V2985_5	3434	482	377	1.60855	0.107716	1.60855	0.107716	74	14	0.10956		V2985_5	3279	376	310	1.26999	0.204088	1.26999	0.204088	74	11	0.209512		V2985_5	188	137	71	0.328469	0.742557	0.328469	0.742557	14	11	0.767498
1006.84	9932.05	0.124832	V2985	3443	473	368	1.71122	0.0870406	1.71122	0.0870406	74	14	0.0882146		V2985	3285	370	304	1.34855	0.177483	1.34855	0.177483	74	11	0.182131		V2985	190	135	69	0.437959	0.661416	0.437959	0.661416	14	11	0.686695
1008.77	9913.05	0.125072	V2984_5	3445	471	366	1.73404	0.0829118	1.73404	0.0829118	74	14	0.0839485		V2984_5	3292	363	297	1.4402	0.149813	1.4402	0.149813	74	11	0.153562		V2984_5	190	135	69	0.437959	0.661416	0.437959	0.661416	14	11	0.686695
1010.7	9894.14	0.125311	V2984	3426	490	385	1.51729	0.129196	1.51729	0.129196	74	14	0.131701		V2984	3296	359	293	1.49257	0.135551	1.49257	0.135551	74	11	0.1388		V2984	191	134	68	0.492704	0.622222	0.492704	0.622222	14	11	0.647494
1012.63	9875.29	0.12555	V2983_5	3414	502	397	1.38039	0.167468	1.38039	0.167468	74	14	0.171041		V2983_5	3286	369	303	1.36164	0.173312	1.36164	0.173312	74	11	0.177831		V2983_5	190	135	69	0.437959	0.661416	0.437959	0.661416	14	11	0.686695
1014.56	9856.52	0.125789	V2983	3422	494	389	1.47165	0.141116	1.47165	0.141116	74	14	0.143969		V2983	3285	370	304	1.34855	0.177483	1.34855	0.177483	74	11	0.182131		V2983	189	136	70	0.383214	0.701561	0.383214	0.701561	14	11	0.726735
1016.49	9837.81	0.126028	V2982_5	3430	486	381	1.56292	0.118073	1.56292	0.118073	74	14	0.120241		V2982_5	3292	363	297	1.4402	0.149813	1.4402	0.149813	74	11	0.153562		V2982_5	188	137	71	0.328469	0.742557	0.328469	0.742557	14	11	0.767498
1018.41	9819.18	0.126267	V2982	3425	491	386	1.50588	0.1321	1.50588	0.1321	74	14	0.134691		V2982	3296	359	293	1.49257	0.135551	1.49257	0.135551	74	11	0.1388		V2982	191	134	68	0.492704	0.622222	0.492704	0.622222	14	11	0.647494
1020.34	9800.62	0.126506	V2981.5	3426	490	385	1.51729	0.129196	1.51729	0.129196	74	14	0.131701		V2981.5	3293	362	296	1.45329	0.146144	1.45329	0.146144	74	11	0.149767		V2981.5	189	136	70	0.383214	0.701561	0.383214	0.701561	14	11	0.726735
1022.27	9782.13	0.126746	V2981	3438	478	373	1.65418	0.0980912	1.65418	0.0980912	74	14	0.0996275		V2981	3293	362	296	1.45329	0.146144	1.45329	0.146144	74	11	0.149767		V2981	188	137	71	0.328469	0.742557	0.328469	0.742557	14	11	0.767498
1024.2	9763.71	0.126985	V2980.5	3440	476	371	1.677	0.0935434	1.677	0.0935434	74	14	0.0949316		V2980.5	3295	360	294	1.47948	0.139014	1.47948	0.139014	74	11	0.142387		V2980.5	187	138	72	0.273724	0.784297	0.273724	0.784297	14	11	0.808899
1026.13	9745.35	0.127224	V2980	3436	480	375	1.63137	0.102814	1.63137	0.102814	74	14	0.104502		V2980	3288	367	301	1.38783	0.165191	1.38783	0.165191	74	11	0.169452		V2980	187	138	72	0.273724	0.784297	0.273724	0.784297	14	11	0.808899
1028.06	9727.07	0.127463	V2979.5	3424	492	387	1.49447	0.135054	1.49447	0.135054	74	14	0.137732		V2979.5	3286	369	303	1.36164	0.173312	1.36164	0.173312	74	11	0.177831		V2979.5	189	136	70	0.383214	0.701561	0.383214	0.701561	14	11	0.726735
1029.99	9708.85	0.127702	V2979	3423	493	388	1.48306	0.138059	1.48306	0.138059	74	14	0.140824		V2979	3286	369	303	1.36164	0.173312	1.36164	0.173312	74	11	0.177831		V2979	188	137	71	0.328469	0.742557	0.328469	0.742557	14	11	0.767498
1031.92	9690.71	0.127941	V2978.5	3430	486	381	1.56292	0.118073	1.56292	0.118073	74	14	0.120241		V2978.5	3291	364	298	1.4271	0.153551	1.4271	0.153551	74	11	0.157427		V2978.5	187	138	72	0.273724	0.784297	0.273724	0.784297	14	11	0.808899
1033.85	9672.63	0.12818	V2978	3423	493	388	1.48306	0.138059	1.48306	0.138059	74	14	0.140824		V2978	3298	357	291	1.51875	0.128826	1.51875	0.128826	74	11	0.13183		V2978	186	139	73	0.21898	0.826666	0.21898	0.826666	14	11	0.850813
1035.77	9654.61	0.12842	V2977.5	3422	494	389	1.47165	0.141116	1.47165	0.141116	74	14	0.143969		V2977.5	3295	360	294	1.47948	0.139014	1.47948	0.139014	74	11	0.142387		V2977.5	187	138	72	0.273724	0.784297	0.273724	0.784297	14	11	0.808899
1037.7	9636.67	0.128659	V2977	3413	503	398	1.36898	0.171007	1.36898	0.171007	74	14	0.174671		V2977	3297	358	292	1.50566	0.132155	1.50566	0.132155	74	11	0.135281		V2977	188	137	71	0.328469	0.742557	0.328469	0.742557	14	11	0.767498
1039.63	9618.79	0.128898	V2976.5	3415	501	396	1.3918	0.163985	1.3918	0.163985	74	14	0.167467		V2976.5	3298	357	291	1.51875	0.128826	1.51875	0.128826	74	11	0.13183		V2976.5	188	137	71	0.328469	0.742557	0.328469	0.742557	14	11	0.767498
1041.56	9600.98	0.129137	V2976	3421	495	390	1.46024	0.144224	1.46024	0.144224	74	14	0.147165		V2976	3294	361	295	1.46638	0.142545	1.46638	0.142545	74	11	0.146043		V2976	187	138	72	0.273724	0.784297	0.273724	0.784297	14	11	0.808899
1043.49	9583.23	0.129376	V2975.5	3424	492	387	1.49447	0.135054	1.49447	0.135054	74	14	0.137732		V2975.5	3293	362	296	1.45329	0.146144	1.45329	0.146144	74	11	0.149767		V2975.5	185	140	74	0.164235	0.869547	0.164235	0.869547	14	11	0.893146
1045.42	9565.55	0.129615	V2975	3427	489	384	1.52869	0.126341	1.52869	0.126341	74	14	0.128761		V2975	3295	360	294	1.47948	0.139014	1.47948	0.139014	74	11	0.142387		V2975	185	140	74	0.164235	0.869547	0.164235	0.869547	14	11	0.893146
1047.35	9547.93	0.129854	V2974.5	3428	488	383	1.5401	0.123536	1.5401	0.123536	74	14	0.125872		V2974.5	3295	360	294	1.47948	0.139014	1.47948	0.139014	74	11	0.142387		V2974.5	187	138	72	0.273724	0.784297	0.273724	0.784297	14	11	0.808899
1049.28	9530.38	0.130094	V2974	3422	494	389	1.47165	0.141116	1.47165	0.141116	74	14	0.143969		V2974	3295	360	294	1.47948	0.139014	1.47948	0.139014	74	11	0.142387		V2974	187	138	72	0.273724	0.784297	0.273724	0.784297	14	11	0.808899
1051.2	9512.89	0.130333	V2973.5	3422	494	389	1.47165	0.141116	1.47165	0.141116	74	14	0.143969		V2973.5	3298	357	291	1.51875	0.128826	1.51875	0.128826	74	11	0.13183		V2973.5	187	138	72	0.273724	0.784297	0.273724	0.784297	14	11	0.808899
1053.13	9495.47	0.130572	V2973	3423	493	388	1.48306	0.138059	1.48306	0.138059	74	14	0.140824		V2973	3298	357	291	1.51875	0.128826	1.51875	0.128826	74	11	0.13183		V2973	186	139	73	0.21898	0.826666	0.21898	0.826666	14	11	0.850813
1055.06	9478.11	0.130811	V2972.5	3424	492	387	1.49447	0.135054	1.49447	0.135054	74	14	0.137732		V2972.5	3294	361	295	1.46638	0.142545	1.46638	0.142545	74	11	0.146043		V2972.5	187	138	72	0.273724	0.784297	0.273724	0.784297	14	11	0.808899
1056.99	9460.82	0.13105	V2972	3427	489	384	1.52869	0.126341	1.52869	0.126341	74	14	0.128761		V2972	3296	359	293	1.49257	0.135551	1.49257	0.135551	74	11	0.1388		V2972	187	138	72	0.273724	0.784297	0.273724	0.784297	14	11	0.808899
1058.92	9443.58	0.131289	V2971.5	3425	491	386	1.50588	0.1321	1.50588	0.1321	74	14	0.134691		V2971.5	3294	361	295	1.46638	0.142545	1.46638	0.142545	74	11	0.146043		V2971.5	186	139	73	0.21898	0.826666	0.21898	0.826666	14	11	0.850813
1060.85	9426.41	0.131528	V2971	3423	493	388	1.48306	0.138059	1.48306	0.138059	74	14	0.140824		V2971	3295	360	294	1.47948	0.139014	1.47948	0.139014	74	11	0.142387		V2971	187	138	72	0.273724	0.784297	0.273724	0.784297	14	11	0.808899
1062.78	9409.31	0.131768	V2970.5	3419	497	392	1.43743	0.150597	1.43743	0.150597	74	14	0.153717		V2970.5	3300	355	289	1.54494	0.122362	1.54494	0.122362	74	11	0.125126		V2970.5	187	138	72	0.273724	0.784297	0.273724	0.784297	14	11	0.808899
1064.71	9392.26	0.132007	V2970	3419	497	392	1.43743	0.150597	1.43743	0.150597	74	14	0.153717		V2970	3293	362	296	1.45329	0.146144	1.45329	0.146144	74	11	0.149767		V2970	186	139	73	0.21898	0.826666	0.21898	0.826666	14	11	0.850813
1066.64	9375.28	0.132246	V2969.5	3420	496	391	1.44884	0.147384	1.44884	0.147384	74	14	0.150415		V2969.5	3300	355	289	1.54494	0.122362	1.54494	0.122362	74	11	0.125126		V2969.5	186	139	73	0.21898	0.826666	0.21898	0.826666	14	11	0.850813
1068.56	9358.35	0.132485	V2969	3426	490	385	1.51729	0.129196	1.51729	0.129196	74	14	0.131701		V2969	3304	351	285	1.59731	0.110198	1.59731	0.110198	74	11	0.112496		V2969	187	138	72	0.273724	0.784297	0.273724	0.784297	14	11	0.808899
1070.49	9341.49	0.132724	V2968.5	3423	493	388	1.48306	0.138059	1.48306	0.138059	74	14	0.140824		V2968.5	3302	353	287	1.57112	0.116155	1.57112	0.116155	74	11	0.118683		V2968.5	186	139	73	0.21898	0.826666	0.21898	0.826666	14	11	0.850813
1072.42	9324.69	0.132963	V2968	3421	495	390	1.46024	0.144224	1.46024	0.144224	74	14	0.147165		V2968	3302	353	287	1.57112	0.116155	1.57112	0.116155	74	11	0.118683		V2968	187	138	72	0.273724	0.784297	0.273724	0.784297	14	11	0.808899
1074.35	9307.95	0.133202	V2967.5	3423	493	388	1.48306	0.138059	1.48306	0.138059	74	14	0.140824		V2967.5	3303	352	286	1.58422	0.113145	1.58422	0.113145	74	11	0.115558		V2967.5	187	138	72	0.273724	0.784297	0.273724	0.784297	14	11	0.808899
1076.28	9291.27	0.133442	V2967	3424	492	387	1.49447	0.135054	1.49447	0.135054	74	14	0.137732		V2967	3301	354	288	1.55803	0.119227	1.55803	0.119227	74	11	0.121872		V2967	187	138	72	0.273724	0.784297	0.273724	0.784297	14	11	0.808899
1078.21	9274.65	0.133681	V2966.5	3423	493	388	1.48306	0.138059	1.48306	0.138059	74	14	0.140824		V2966.5	3300	355	289	1.54494	0.122362	1.54494	0.122362	74	11	0.125126		V2966.5	187	138	72	0.273724	0.784297	0.273724	0.784297	14	11	0.808899
1080.14	9258.09	0.13392	V2966	3420	496	391	1.44884	0.147384	1.44884	0.147384	74	14	0.150415		V2966	3301	354	288	1.55803	0.119227	1.55803	0.119227	74	11	0.121872		V2966	187	138	72	0.273724	0.784297	0.273724	0.784297	14	11	0.808899
1082.07	9241.58	0.134159	V2965.5	3423	493	388	1.48306	0.138059	1.48306	0.138059	74	14	0.140824		V2965.5	3297	358	292	1.50566	0.132155	1.50566	0.132155	74	11	0.135281		V2965.5	186	139	73	0.21898	0.826666	0.21898	0.826666	14	11	0.850813
1083.99	9225.14	0.134398	V2965	3425	491	386	1.50588	0.1321	1.50588	0.1321	74	14	0.134691		V2965	3302	353	287	1.57112	0.116155	1.57112	0.116155	74	11	0.118683		V2965	186	139	73	0.21898	0.826666	0.21898	0.826666	14	11	0.850813
1085.92	9208.75	0.134637	V2964.5	3424	492	387	1.49447	0.135054	1.49447	0.135054	74	14	0.137732		V2964.5	3303	352	286	1.58422	0.113145	1.58422	0.113145	74	11	0.115558		V2964.5	185	140	74	0.164235	0.869547	0.164235	0.869547	14	11	0.893146
1087.85	9192.43	0.134876	V2964	3427	489	384	1.52869	0.126341	1.52869	0.126341	74	14	0.128761		V2964	3304	351	285	1.59731	0.110198	1.59731	0.110198	74	11	0.112496		V2964	186	139	73	0.21898	0.826666	0.21898	0.826666	14	11	0.850813
1089.78	9176.16	0.135116	V2963.5	3426	490	385	1.51729	0.129196	1.51729	0.129196	74	14	0.131701		V2963.5	3306	349	283	1.62349	0.104485	1.62349	0.104485	74	11	0.106559		V2963.5	187	138	72	0.273724	0.784297	0.273724	0.784297	14	11	0.808899
1091.71	9159.94	0.135355	V2963	3422	494	389	1.47165	0.141116	1.47165	0.141116	74	14	0.143969		V2963	3304	351	285	1.59731	0.110198	1.59731	0.110198	74	11	0.112496		V2963	187	138	72	0.273724	0.784297	0.273724	0.784297	14	11	0.808899
1093.64	9143.79	0.135594	V2962.5	3427	489	384	1.52869	0.126341	1.52869	0.126341	74	14	0.128761		V2962.5	3304	351	285	1.59731	0.110198	1.59731	0.110198	74	11	0.112496		V2962.5	186	139	73	0.21898	0.826666	0.21898	0.826666	14	11	0.850813
1095.57	9127.69	0.135833	V2962	3426	490	385	1.51729	0.129196	1.51729	0.129196	74	14	0.131701		V2962	3304	351	285	1.59731	0.110198	1.59731	0.110198	74	11	0.112496		V2962	187	138	72	0.273724	0.784297	0.273724	0.784297	14	11	0.808899
1097.5	9111.65	0.136072	V2961.5	3424	492	387	1.49447	0.135054	1.49447	0.135054	74	14	0.137732		V2961.5	3305	350	284	1.6104	0.107311	1.6104	0.107311	74	11	0.109497		V2961.5	187	138	72	0.273724	0.784297	0.273724	0.784297	14	11	0.808899
1099.43	9095.66	0.136311	V2961	3424	492	387	1.49447	0.135054	1.49447	0.135054	74	14	0.137732		V2961	3308	347	281	1.64968	0.0990093	1.64968	0.0990093	74	11	0.100866		V2961	188	137	71	0.328469	0.742557	0.328469	0.742557	14	11	0.767498
1101.35	9079.73	0.13655	V2960.5	3424	492	387	1.49447	0.135054	1.49447	0.135054	74	14	0.137732		V2960.5	3307	348	282	1.63659	0.101718	1.63659	0.101718	74	11	0.103682		V2960.5	189	136	70	0.383214	0.701561	0.383214	0.701561	14	11	0.726735
1103.28	9063.86	0.13679	V2960	3421	495	390	1.46024	0.144224	1.46024	0.144224	74	14	0.147165		V2960	3304	351	285	1.59731	0.110198	1.59731	0.110198	74	11	0.112496		V2960	189	136	70	0.383214	0.701561	0.383214	0.701561	14	11	0.726735
1105.21	9048.04	0.137029	V2959.5	3423	493	388	1.48306	0.138059	1.48306	0.138059	74	14	0.140824		V2959.5	3305	350	284	1.6104	0.107311	1.6104	0.107311	74	11	0.109497		V2959.5	188	137	71	0.328469	0.742557	0.328469	0.742557	14	11	0.767498
1107.14	9032.28	0.137268	V2959	3425	491	386	1.50588	0.1321	1.50588	0.1321	74	14	0.134691		V2959	3306	349	283	1.62349	0.104485	1.62349	0.104485	74	11	0.106559		V2959	189	136	70	0.383214	0.701561	0.383214	0.701561	14	11	0.726735
1109.07	9016.57	0.137507	V2958.5	3427	489	384	1.52869	0.126341	1.52869	0.126341	74	14	0.128761		V2958.5	3304	351	285	1.59731	0.110198	1.59731	0.110198	74	11	0.112496		V2958.5	188	137	71	0.328469	0.742557	0.328469	0.742557	14	11	0.767498
1111	9000.92	0.137746	V2958	3426	490	385	1.51729	0.129196	1.51729	0.129196	74	14	0.131701		V2958	3303	352	286	1.58422	0.113145	1.58422	0.113145	74	11	0.115558		V2958	187	138	72	0.273724	0.784297	0.273724	0.784297	14	11	0.808899
1112.93	8985.32	0.137985	V2957.5	3425	491	386	1.50588	0.1321	1.50588	0.1321	74	14	0.134691		V2957.5	3302	353	287	1.57112	0.116155	1.57112	0.116155	74	11	0.118683		V2957.5	188	137	71	0.328469	0.742557	0.328469	0.742557	14	11	0.767498
1114.86	8969.77	0.138224	V2957	3423	493	388	1.48306	0.138059	1.48306	0.138059	74	14	0.140824		V2957	3305	350	284	1.6104	0.107311	1.6104	0.107311	74	11	0.109497		V2957	188	137	71	0.328469	0.742557	0.328469	0.742557	14	11	0.767498
1116.78	8954.28	0.138464	V2956.5	3425	491	386	1.50588	0.1321	1.50588	0.1321	74	14	0.134691		V2956.5	3304	351	285	1.59731	0.110198	1.59731	0.110198	74	11	0.112496		V2956.5	189	136	70	0.383214	0.701561	0.383214	0.701561	14	11	0.726735
1118.71	8938.84	0.138703	V2956	3424	492	387	1.49447	0.135054	1.49447	0.135054	74	14	0.137732		V2956	3306	349	283	1.62349	0.104485	1.62349	0.104485	74	11	0.106559		V2956	189	136	70	0.383214	0.701561	0.383214	0.701561	14	11	0.726735
1120.64	8923.46	0.138942	V2955.5	3426	490	385	1.51729	0.129196	1.51729	0.129196	74	14	0.131701		V2955.5	3304	351	285	1.59731	0.110198	1.59731	0.110198	74	11	0.112496		V2955.5	188	137	71	0.328469	0.742557	0.328469	0.742557	14	11	0.767498
1122.57	8908.12	0.139181	V2955	3425	491	386	1.50588	0.1321	1.50588	0.1321	74	14	0.134691		V2955	3304	351	285	1.59731	0.110198	1.59731	0.110198	74	11	0.112496		V2955	188	137	71	0.328469	0.742557	0.328469	0.742557	14	11	0.767498
1124.5	8892.84	0.13942	V2954.5	3423	493	388	1.48306	0.138059	1.48306	0.138059	74	14	0.140824		V2954.5	3306	349	283	1.62349	0.104485	1.62349	0.104485	74	11	0.106559		V2954.5	189	136	70	0.383214	0.701561	0.383214	0.701561	14	11	0.726735
1126.43	8877.62	0.139659	V2954	3423	493	388	1.48306	0.138059	1.48306	0.138059	74	14	0.140824		V2954	3310	345	279	1.67587	0.0937655	1.67587	0.0937655	74	11	0.0954108		V2954	189	136	70	0.383214	0.701561	0.383214	0.701561	14	11	0.726735
1128.36	8862.44	0.139898	V2953.5	3427	489	384	1.52869	0.126341	1.5287	0.12634	74	14	0.128761		V2953.5	3310	345	279	1.67587	0.0937655	1.67587	0.0937639	74	11	0.0954108		V2953.5	189	136	70	0.383214	0.701561	0.383214	0.701561	14	11	0.726735
1130.29	8847.32	0.140138	V2953	3427	489	384	1.52869	0.126341	1.52869	0.126341	74	14	0.128761		V2953	3310	345	279	1.67587	0.0937655	1.67587	0.0937655	74	11	0.0954108		V2953	189	136	70	0.383214	0.701561	0.383214	0.701561	14	11	0.726735
1132.21	8832.24	0.140377	V2952.5	3424	492	387	1.49447	0.135054	1.49447	0.135054	74	14	0.137732		V2952.5	3309	346	280	1.66277	0.0963589	1.66277	0.0963589	74	11	0.0981089		V2952.5	188	137	71	0.328469	0.742557	0.328469	0.742557	14	11	0.767498
1134.14	8817.22	0.140616	V2952	3425	491	386	1.50588	0.1321	1.50588	0.1321	74	14	0.134691		V2952	3309	346	280	1.66277	0.0963589	1.66277	0.0963589	74	11	0.0981089		V2952	189	136	70	0.383214	0.701561	0.383214	0.701561	14	11	0.726735
1136.07	8802.25	0.140855	V2951.5	3426	490	385	1.51729	0.129196	1.51729	0.129196	74	14	0.131701		V2951.5	3309	346	280	1.66277	0.0963589	1.66277	0.0963589	74	11	0.0981089		V2951.5	189	136	70	0.383214	0.701561	0.383214	0.701561	14	11	0.726735
1138	8787.34	0.141094	V2951	3427	489	384	1.52869	0.126341	1.52869	0.126341	74	14	0.128761		V2951	3312	343	277	1.70205	0.0887468	1.70205	0.0887468	74	11	0.0901877		V2951	190	135	69	0.437959	0.661416	0.437959	0.661416	14	11	0.686695
1139.93	8772.47	0.141333	V2950.5	3427	489	384	1.52869	0.126341	1.52869	0.126341	74	14	0.128761		V2950.5	3314	341	275	1.72824	0.0839468	1.72824	0.0839468	74	11	0.0851906		V2950.5	190	135	69	0.437959	0.661416	0.437959	0.661416	14	11	0.686695
1141.86	8757.65	0.141572	V2950	3426	490	385	1.51729	0.129196	1.51729	0.129196	74	14	0.131701		V2950	3316	339	273	1.75442	0.0793592	1.75442	0.0793592	74	11	0.0804133		V2950	190	135	69	0.437959	0.661416	0.437959	0.661416	14	11	0.686695
1143.79	8742.88	0.141812	V2949.5	3426	490	385	1.51729	0.129196	1.51729	0.129196	74	14	0.131701		V2949.5	3315	340	274	1.74133	0.0816269	1.74133	0.0816269	74	11	0.0827749		V2949.5	190	135	69	0.437959	0.661416	0.437959	0.661416	14	11	0.686695
1145.72	8728.16	0.142051	V2949	3424	492	387	1.49447	0.135054	1.49447	0.135054	74	14	0.137732		V2949	3315	340	274	1.74133	0.0816269	1.74133	0.0816269	74	11	0.0827749		V2949	190	135	69	0.437959	0.661416	0.437959	0.661416	14	11	0.686695
1147.65	8713.49	0.14229	V2948.5	3424	492	387	1.49447	0.135054	1.49447	0.135054	74	14	0.137732		V2948.5	3317	338	272	1.76751	0.077143	1.76751	0.077143	74	11	0.0781052		V2948.5	190	135	69	0.437959	0.661416	0.437959	0.661416	14	11	0.686695
1149.57	8698.87	0.142529	V2948	3424	492	387	1.49447	0.135054	1.49447	0.135054	74	14	0.137732		V2948	3315	340	274	1.74133	0.0816269	1.74133	0.0816269	74	11	0.0827749		V2948	190	135	69	0.437959	0.661416	0.437959	0.661416	14	11	0.686695
1151.5	8684.3	0.142768	V2947.5	3425	491	386	1.50588	0.1321	1.50588	0.1321	74	14	0.134691		V2947.5	3314	341	275	1.72824	0.0839468	1.72824	0.0839468	74	11	0.0851906		V2947.5	190	135	69	0.437959	0.661416	0.437959	0.661416	14	11	0.686695
1153.43	8669.78	0.143007	V2947	3425	491	386	1.50588	0.1321	1.50588	0.1321	74	14	0.134691		V2947	3317	338	272	1.76751	0.077143	1.76751	0.077143	74	11	0.0781052		V2947	190	135	69	0.437959	0.661416	0.437959	0.661416	14	11	0.686695
1155.36	8655.31	0.143246	V2946.5	3424	492	387	1.49447	0.135054	1.49447	0.135054	74	14	0.137732		V2946.5	3320	335	269	1.80679	0.0707956	1.80679	0.0707956	74	11	0.0714935		V2946.5	190	135	69	0.437959	0.661416	0.437959	0.661416	14	11	0.686695
1157.29	8640.88	0.143486	V2946	3423	493	388	1.48306	0.138059	1.48306	0.138059	74	14	0.140824		V2946	3319	336	270	1.7937	0.072862	1.7937	0.072862	74	11	0.073646		V2946	189	136	70	0.383214	0.701561	0.383214	0.701561	14	11	0.726735
1159.22	8626.5	0.143725	V2945.5	3421	495	390	1.46024	0.144224	1.46024	0.144224	74	14	0.147165		V2945.5	3320	335	269	1.80679	0.0707956	1.80679	0.0707956	74	11	0.0714935		V2945.5	189	136	70	0.383214	0.701561	0.383214	0.701561	14	11	0.726735
1161.15	8612.17	0.143964	V2945	3421	495	390	1.46024	0.144224	1.46024	0.144224	74	14	0.147165		V2945	3323	332	266	1.84607	0.0648829	1.84607	0.0648829	74	11	0.0653345		V2945	190	135	69	0.437959	0.661416	0.437959	0.661416	14	11	0.686695
1163.08	8597.89	0.144203	V2944.5	3423	493	388	1.48306	0.138059	1.48306	0.138059	74	14	0.140824		V2944.5	3324	331	265	1.85916	0.0630049	1.85916	0.0630049	74	11	0.0633785		V2944.5	189	136	70	0.383214	0.701561	0.383214	0.701561	14	11	0.726735
1165	8583.66	0.144442	V2944	3424	492	387	1.49447	0.135054	1.49447	0.135054	74	14	0.137732		V2944	3320	335	269	1.80679	0.0707956	1.80679	0.0707956	74	11	0.0714935		V2944	188	137	71	0.328469	0.742557	0.328469	0.742557	14	11	0.767498
1166.93	8569.47	0.144681	V2943.5	3423	493	388	1.48306	0.138059	1.48306	0.138059	74	14	0.140824		V2943.5	3320	335	269	1.80679	0.0707956	1.80679	0.0707956	74	11	0.0714935		V2943.5	190	135	69	0.437959	0.661416	0.437959	0.661416	14	11	0.686695
1168.86	8555.33	0.14492	V2943	3421	495	390	1.46024	0.144224	1.46024	0.144224	74	14	0.147165		V2943	3325	330	264	1.87226	0.0611721	1.87226	0.0611721	74	11	0.0614697		V2943	189	136	70	0.383214	0.701561	0.383214	0.701561	14	11	0.726735
1170.79	8541.23	0.14516	V2942.5	3420	496	391	1.44884	0.147384	1.44884	0.147384	74	14	0.150415		V2942.5	3324	331	265	1.85916	0.0630049	1.85916	0.0630049	74	11	0.0633785		V2942.5	188	137	71	0.328469	0.742557	0.328469	0.742557	14	11	0.767498
1172.72	8527.18	0.145399	V2942	3423	493	388	1.48306	0.138059	1.48306	0.138059	74	14	0.140824		V2942	3326	329	263	1.88535	0.0593837	1.88535	0.0593837	74	11	0.0596074		V2942	188	137	71	0.328469	0.742557	0.328469	0.742557	14	11	0.767498
1174.65	8513.18	0.145638	V2941.5	3421	495	390	1.46024	0.144224	1.46024	0.144224	74	14	0.147165		V2941.5	3328	327	261	1.91153	0.0559369	1.91153	0.0559369	74	11	0.0560189		V2941.5	188	137	71	0.328469	0.742557	0.328469	0.742557	14	11	0.767498
1176.58	8499.23	0.145877	V2941	3421	495	390	1.46024	0.144224	1.46024	0.144224	74	14	0.147165		V2941	3329	326	260	1.92463	0.0542769	1.92463	0.0542769	74	11	0.0542912		V2941	188	137	71	0.328469	0.742557	0.328469	0.742557	14	11	0.767498
1178.51	8485.32	0.146116	V2940.5	3420	496	391	1.44884	0.147384	1.44884	0.147384	74	14	0.150415		V2940.5	3328	327	261	1.91153	0.0559369	1.91153	0.0559369	74	11	0.0560189		V2940.5	188	137	71	0.328469	0.742557	0.328469	0.742557	14	11	0.767498
1180.44	8471.45	0.146355	V2940	3421	495	390	1.46024	0.144224	1.46024	0.144224	74	14	0.147165		V2940	3330	325	259	1.93772	0.0526583	1.93772	0.0526583	74	11	0.0526069		V2940	188	137	71	0.328469	0.742557	0.328469	0.742557	14	11	0.767498
1182.36	8457.63	0.146594	V2939.5	3419	497	392	1.43743	0.150597	1.43743	0.150597	74	14	0.153717		V2939.5	3330	325	259	1.93772	0.0526583	1.93772	0.0526583	74	11	0.0526069		V2939.5	188	137	71	0.328469	0.742557	0.328469	0.742557	14	11	0.767498
1184.29	8443.86	0.146834	V2939	3421	495	390	1.46024	0.144224	1.46024	0.144224	74	14	0.147165		V2939	3333	322	256	1.977	0.0480428	1.977	0.0480428	74	11	0.0478064		V2939	187	138	72	0.273724	0.784297	0.273724	0.784297	14	11	0.808899
1186.22	8430.13	0.147073	V2938.5	3422	494	389	1.47165	0.141116	1.47165	0.141116	74	14	0.143969		V2938.5	3329	326	260	1.92463	0.0542769	1.92463	0.0542769	74	11	0.0542912		V2938.5	187	138	72	0.273724	0.784297	0.273724	0.784297	14	11	0.808899
1188.15	8416.44	0.147312	V2938	3417	499	394	1.41461	0.157183	1.41461	0.157183	74	14	0.160483		V2938	3328	327	261	1.91153	0.0559369	1.91153	0.0559369	74	11	0.0560189		V2938	188	137	71	0.328469	0.742557	0.328469	0.742557	14	11	0.767498
1190.08	8402.8	0.147551	V2937.5	3417	499	394	1.41461	0.157183	1.41461	0.157183	74	14	0.160483		V2937.5	3330	325	259	1.93772	0.0526583	1.93772	0.0526583	74	11	0.0526069		V2937.5	188	137	71	0.328469	0.742557	0.328469	0.742557	14	11	0.767498
1192.01	8389.2	0.14779	V2937	3420	496	391	1.44884	0.147384	1.44884	0.147384	74	14	0.150415		V2937	3332	323	257	1.9639	0.049542	1.9639	0.049542	74	11	0.0493652		V2937	188	137	71	0.328469	0.742557	0.328469	0.742557	14	11	0.767498
1193.94	8375.65	0.148029	V2936.5	3419	497	392	1.43743	0.150597	1.43743	0.150597	74	14	0.153717		V2936.5	3331	324	258	1.95081	0.0510803	1.95081	0.0510803	74	11	0.0509651		V2936.5	187	138	72	0.273724	0.784297	0.273724	0.784297	14	11	0.808899
1195.87	8362.14	0.148268	V2936	3416	500	395	1.4032	0.160557	1.4032	0.160557	74	14	0.163948		V2936	3332	323	257	1.9639	0.049542	1.9639	0.049542	74	11	0.0493652		V2936	187	138	72	0.273724	0.784297	0.273724	0.784297	14	11	0.808899
1197.79	8348.68	0.148508	V2935.5	3416	500	395	1.4032	0.160557	1.4032	0.160557	74	14	0.163948		V2935.5	3334	321	255	1.99009	0.0465818	1.99009	0.0465818	74	11	0.0462879		V2935.5	187	138	72	0.273724	0.784297	0.273724	0.784297	14	11	0.808899
1199.72	8335.25	0.148747	V2935	3415	501	396	1.3918	0.163985	1.3918	0.163985	74	14	0.167467		V2935	3332	323	257	1.9639	0.049542	1.9639	0.049542	74	11	0.0493652		V2935	188	137	71	0.328469	0.742557	0.328469	0.742557	14	11	0.767498
1201.65	8321.87	0.148986	V2934.5	3415	501	396	1.3918	0.163985	1.3918	0.163985	74	14	0.167467		V2934.5	3330	325	259	1.93772	0.0526583	1.93772	0.0526583	74	11	0.0526069		V2934.5	187	138	72	0.273724	0.784297	0.273724	0.784297	14	11	0.808899
1203.58	8308.54	0.149225	V2934	3415	501	396	1.3918	0.163985	1.3918	0.163985	74	14	0.167467		V2934	3333	322	256	1.977	0.0480428	1.977	0.0480428	74	11	0.0478064	3.20112e-289	V2934	187	138	72	0.273724	0.784297	0.273724	0.784297	14	11	0.808899
1205.51	8295.24	0.149464	V2933.5	3416	500	395	1.4032	0.160557	1.4032	0.160557	74	14	0.163948		V2933.5	3334	321	255	1.99009	0.0465818	1.99009	0.0465818	74	11	0.0462879		V2933.5	188	137	71	0.328469	0.742557	0.328469	0.742557	14	11	0.767498
1207.44	8281.99	0.149703	V2933	3415	501	396	1.3918	0.163985	1.3918	0.163985	74	14	0.167467		V2933	3334	321	255	1.99009	0.0465818	1.99009	0.0465818	74	11	0.0462879		V2933	187	138	72	0.273724	0.784297	0.273724	0.784297	14	11	0.808899
1209.37	8268.78	0.149942	V2932.5	3414	502	397	1.38039	0.167468	1.38039	0.167468	74	14	0.171041		V2932.5	3333	322	256	1.977	0.0480428	1.977	0.0480428	74	11	0.0478064		V2932.5	187	138	72	0.273724	0.784297	0.273724	0.784297	14	11	0.808899
1211.3	8255.62	0.150182	V2932	3415	501	396	1.3918	0.163985	1.3918	0.163985	74	14	0.167467		V2932	3333	322	256	1.977	0.0480428	1.977	0.0480428	74	11	0.0478064		V2932	188	137	71	0.328469	0.742557	0.328469	0.742557	14	11	0.767498
1213.23	8242.49	0.150421	V2931.5	3415	501	396	1.3918	0.163985	1.3918	0.163985	74	14	0.167467		V2931.5	3335	320	254	2.00318	0.0451585	2.00318	0.0451585	74	11	0.0448091		V2931.5	188	137	71	0.328469	0.742557	0.328469	0.742557	14	11	0.767498
1215.15	8229.41	0.15066	V2931	3416	500	395	1.4032	0.160557	1.4032	0.160557	74	14	0.163948		V2931	3334	321	255	1.99009	0.0465818	1.99009	0.0465818	74	11	0.0462879		V2931	188	137	71	0.328469	0.742557	0.328469	0.742557	14	11	0.767498
1217.08	8216.37	0.150899	V2930.5	3415	501	396	1.3918	0.163985	1.3918	0.163985	74	14	0.167467		V2930.5	3336	319	253	2.01628	0.043772	2.01628	0.043772	74	11	0.043369		V2930.5	188	137	71	0.328469	0.742557	0.328469	0.742557	14	11	0.767498
1219.01	8203.37	0.151138	V2930	3414	502	397	1.38039	0.167468	1.38039	0.167468	74	14	0.171041		V2930	3336	319	253	2.01628	0.043772	2.01628	0.043772	74	11	0.043369		V2930	188	137	71	0.328469	0.742557	0.328469	0.742557	14	11	0.767498
1220.94	8190.41	0.151377	V2929.5	3413	503	398	1.36898	0.171007	1.36898	0.171007	74	14	0.174671		V2929.5	3336	319	253	2.01628	0.043772	2.01628	0.043772	74	11	0.043369		V2929.5	188	137	71	0.328469	0.742557	0.328469	0.742557	14	11	0.767498
1222.87	8177.49	0.151616	V2929	3413	503	398	1.36898	0.171007	1.36898	0.171007	74	14	0.174671		V2929	3336	319	253	2.01628	0.043772	2.01628	0.043772	74	11	0.043369		V2929	188	137	71	0.328469	0.742557	0.328469	0.742557	14	11	0.767498
1224.8	8164.61	0.151856	V2928.5	3414	502	397	1.38039	0.167468	1.38039	0.167468	74	14	0.171041		V2928.5	3336	319	253	2.01628	0.043772	2.01628	0.043772	74	11	0.043369		V2928.5	188	137	71	0.328469	0.742557	0.328469	0.742557	14	11	0.767498
1226.73	8151.77	0.152095	V2928	3414	502	397	1.38039	0.167468	1.38039	0.167468	74	14	0.171041		V2928	3335	320	254	2.00318	0.0451585	2.00318	0.0451585	74	11	0.0448091		V2928	188	137	71	0.328469	0.742557	0.328469	0.742557	14	11	0.767498
1228.66	8138.98	0.152334	V2927.5	3414	502	397	1.38039	0.167468	1.38039	0.167468	74	14	0.171041		V2927.5	3336	319	253	2.01628	0.043772	2.01628	0.043772	74	11	0.043369		V2927.5	188	137	71	0.328469	0.742557	0.328469	0.742557	14	11	0.767498
1230.58	8126.22	0.152573	V2927	3413	503	398	1.36898	0.171007	1.36898	0.171007	74	14	0.174671		V2927	3337	318	252	2.02937	0.0424216	2.02937	0.0424216	74	11	0.0419671		V2927	189	136	70	0.383214	0.701561	0.383214	0.701561	14	11	0.726735
1232.51	8113.5	0.152812	V2926.5	3413	503	398	1.36898	0.171007	1.36898	0.171007	74	14	0.174671		V2926.5	3337	318	252	2.02937	0.0424216	2.02937	0.0424216	74	11	0.0419671		V2926.5	189	136	70	0.383214	0.701561	0.383214	0.701561	14	11	0.726735
1234.44	8100.82	0.153051	V2926	3414	502	397	1.38039	0.167468	1.38039	0.167468	74	14	0.171041		V2926	3336	319	253	2.01628	0.043772	2.01628	0.043772	74	11	0.043369		V2926	188	137	71	0.328469	0.742557	0.328469	0.742557	14	11	0.767498
1236.37	8088.19	0.15329	V2925.5	3414	502	397	1.38039	0.167468	1.38039	0.167468	74	14	0.171041		V2925.5	3336	319	253	2.01628	0.043772	2.01628	0.043772	74	11	0.043369		V2925.5	189	136	70	0.383214	0.701561	0.383214	0.701561	14	11	0.726735
1238.3	8075.59	0.15353	V2925	3413	503	398	1.36898	0.171007	1.36898	0.171007	74	14	0.174671		V2925	3338	317	251	2.04246	0.0411066	2.04246	0.0411066	74	11	0.0406026		V2925	189	136	70	0.383214	0.701561	0.383214	0.701561	14	11	0.726735
1240.23	8063.03	0.153769	V2924.5	3413	503	398	1.36898	0.171007	1.36898	0.171007	74	14	0.174671		V2924.5	3337	318	252	2.02937	0.0424216	2.02937	0.0424216	74	11	0.0419671		V2924.5	189	136	70	0.383214	0.701561	0.383214	0.701561	14	11	0.726735
1242.16	8050.51	0.154008	V2924	3413	503	398	1.36898	0.171007	1.36898	0.171007	74	14	0.174671		V2924	3338	317	251	2.04246	0.0411066	2.04246	0.0411066	74	11	0.0406026		V2924	189	136	70	0.383214	0.701561	0.383214	0.701561	14	11	0.726735
1244.09	8038.03	0.154247	V2923.5	3412	504	399	1.35757	0.174601	1.35757	0.174601	74	14	0.178357		V2923.5	3338	317	251	2.04246	0.0411066	2.04246	0.0411066	74	11	0.0406026		V2923.5	188	137	71	0.328469	0.742557	0.328469	0.742557	14	11	0.767498
1246.02	8025.58	0.154486	V2923	3414	502	397	1.38039	0.167468	1.38039	0.167468	74	14	0.171041		V2923	3338	317	251	2.04246	0.0411066	2.04246	0.0411066	74	11	0.0406026		V2923	188	137	71	0.328469	0.742557	0.328469	0.742557	14	11	0.767498
1247.94	8013.18	0.154725	V2922.5	3414	502	397	1.38039	0.167468	1.38039	0.167468	74	14	0.171041		V2922.5	3338	317	251	2.04246	0.0411066	2.04246	0.0411066	74	11	0.0406026		V2922.5	189	136	70	0.383214	0.701561	0.383214	0.701561	14	11	0.726735
1249.87	8000.81	0.154964	V2922	3414	502	397	1.38039	0.167468	1.38039	0.167468	74	14	0.171041		V2922	3337	318	252	2.02937	0.0424216	2.02937	0.0424216	74	11	0.0419671		V2922	189	136	70	0.383214	0.701561	0.383214	0.701561	14	11	0.726735
1251.8	7988.49	0.155204	V2921.5	3416	500	395	1.4032	0.160557	1.4032	0.160557	74	14	0.163948		V2921.5	3337	318	252	2.02937	0.0424216	2.02937	0.0424216	74	11	0.0419671		V2921.5	189	136	70	0.383214	0.701561	0.383214	0.701561	14	11	0.726735
1253.73	7976.2	0.155443	V2921	3418	498	393	1.42602	0.153863	1.42602	0.153863	74	14	0.157073		V2921	3338	317	251	2.04246	0.0411066	2.04246	0.0411066	74	11	0.0406026		V2921	189	136	70	0.383214	0.701561	0.383214	0.701561	14	11	0.726735
1255.66	7963.94	0.155682	V2920.5	3416	500	395	1.4032	0.160557	1.4032	0.160557	74	14	0.163948		V2920.5	3338	317	251	2.04246	0.0411066	2.04246	0.0411066	74	11	0.0406026		V2920.5	189	136	70	0.383214	0.701561	0.383214	0.701561	14	11	0.726735
1257.59	7951.73	0.155921	V2920	3417	499	394	1.41461	0.157183	1.41461	0.157183	74	14	0.160483		V2920	3337	318	252	2.02937	0.0424216	2.02937	0.0424216	74	11	0.0419671		V2920	189	136	70	0.383214	0.701561	0.383214	0.701561	14	11	0.726735
1259.52	7939.55	0.15616	V2919.5	3417	499	394	1.41461	0.157183	1.41461	0.157183	74	14	0.160483		V2919.5	3338	317	251	2.04246	0.0411066	2.04246	0.0411066	74	11	0.0406026		V2919.5	189	136	70	0.383214	0.701561	0.383214	0.701561	14	11	0.726735
1261.45	7927.41	0.156399	V2919	3416	500	395	1.4032	0.160557	1.4032	0.160557	74	14	0.163948		V2919	3340	315	249	2.06865	0.0385801	2.06865	0.0385801	74	11	0.0379828		V2919	189	136	70	0.383214	0.701561	0.383214	0.701561	14	11	0.726735
1263.37	7915.31	0.156638	V2918.5	3418	498	393	1.42602	0.153863	1.42602	0.153863	74	14	0.157073		V2918.5	3340	315	249	2.06865	0.0385801	2.06865	0.0385801	74	11	0.0379828		V2918.5	189	136	70	0.383214	0.701561	0.383214	0.701561	14	11	0.726735
1265.3	7903.24	0.156878	V2918	3417	499	394	1.41461	0.157183	1.41461	0.157183	74	14	0.160483		V2918	3337	318	252	2.02937	0.0424216	2.02937	0.0424216	74	11	0.0419671		V2918	189	136	70	0.383214	0.701561	0.383214	0.701561	14	11	0.726735
1267.23	7891.21	0.157117	V2917.5	3417	499	394	1.41461	0.157183	1.41461	0.157183	74	14	0.160483		V2917.5	3338	317	251	2.04246	0.0411066	2.04246	0.0411066	74	11	0.0406026		V2917.5	188	137	71	0.328469	0.742557	0.328469	0.742557	14	11	0.767498
1269.16	7879.22	0.157356	V2917	3417	499	394	1.41461	0.157183	1.41461	0.157183	74	14	0.160483		V2917	3338	317	251	2.04246	0.0411066	2.04246	0.0411066	74	11	0.0406026		V2917	188	137	71	0.328469	0.742557	0.328469	0.742557	14	11	0.767498
1271.09	7867.27	0.157595	V2916.5	3418	498	393	1.42602	0.153863	1.42602	0.153863	74	14	0.157073		V2916.5	3337	318	252	2.02937	0.0424216	2.02937	0.0424216	74	11	0.0419671		V2916.5	188	137	71	0.328469	0.742557	0.328469	0.742557	14	11	0.767498
1273.02	7855.35	0.157834	V2916	3416	500	395	1.4032	0.160557	1.4032	0.160557	74	14	0.163948		V2916	3338	317	251	2.04246	0.0411066	2.04246	0.0411066	74	11	0.0406026		V2916	188	137	71	0.328469	0.742557	0.328469	0.742557	14	11	0.767498
1274.95	7843.46	0.158073	V2915.5	3416	500	395	1.4032	0.160557	1.4032	0.160557	74	14	0.163948		V2915.5	3338	317	251	2.04246	0.0411066	2.04246	0.0411066	74	11	0.0406026		V2915.5	188	137	71	0.328469	0.742557	0.328469	0.742557	14	11	0.767498
1276.88	7831.61	0.158312	V2915	3418	498	393	1.42602	0.153863	1.42602	0.153863	74	14	0.157073		V2915	3338	317	251	2.04246	0.0411066	2.04246	0.0411066	74	11	0.0406026		V2915	189	136	70	0.383214	0.701561	0.383214	0.701561	14	11	0.726735
1278.81	7819.8	0.158552	V2914.5	3419	497	392	1.43743	0.150597	1.43743	0.150597	74	14	0.153717		V2914.5	3337	318	252	2.02937	0.0424216	2.02937	0.0424216	74	11	0.0419671		V2914.5	189	136	70	0.383214	0.701561	0.383214	0.701561	14	11	0.726735
1280.73	7808.02	0.158791	V2914	3418	498	393	1.42602	0.153863	1.42602	0.153863	74	14	0.157073		V2914	3337	318	252	2.02937	0.0424216	2.02937	0.0424216	74	11	0.0419671		V2914	189	136	70	0.383214	0.701561	0.383214	0.701561	14	11	0.726735
1282.66	7796.28	0.15903	V2913.5	3416	500	395	1.4032	0.160557	1.4032	0.160557	74	14	0.163948		V2913.5	3337	318	252	2.02937	0.0424216	2.02937	0.0424216	74	11	0.0419671		V2913.5	188	137	71	0.328469	0.742557	0.328469	0.742557	14	11	0.767498
1284.59	7784.58	0.159269	V2913	3419	497	392	1.43743	0.150597	1.43743	0.150597	74	14	0.153717		V2913	3337	318	252	2.02937	0.0424216	2.02937	0.0424216	74	11	0.0419671		V2913	189	136	70	0.383214	0.701561	0.383214	0.701561	14	11	0.726735
1286.52	7772.91	0.159508	V2912.5	3416	500	395	1.4032	0.160557	1.4032	0.160557	74	14	0.163948		V2912.5	3338	317	251	2.04246	0.0411066	2.04246	0.0411066	74	11	0.0406026		V2912.5	189	136	70	0.383214	0.701561	0.383214	0.701561	14	11	0.726735
1288.45	7761.27	0.159747	V2912	3416	500	395	1.4032	0.160557	1.4032	0.160557	74	14	0.163948		V2912	3337	318	252	2.02937	0.0424216	2.02937	0.0424216	74	11	0.0419671		V2912	189	136	70	0.383214	0.701561	0.383214	0.701561	14	11	0.726735
1290.38	7749.67	0.159986	V2911.5	3416	500	395	1.4032	0.160557	1.4032	0.160557	74	14	0.163948		V2911.5	3337	318	252	2.02937	0.0424216	2.02937	0.0424216	74	11	0.0419671		V2911.5	189	136	70	0.383214	0.701561	0.383214	0.701561	14	11	0.726735
1292.31	7738.1	0.160226	V2911	3417	499	394	1.41461	0.157183	1.41461	0.157183	74	14	0.160483		V2911	3338	317	251	2.04246	0.0411066	2.04246	0.0411066	74	11	0.0406026		V2911	189	136	70	0.383214	0.701561	0.383214	0.701561	14	11	0.726735
1294.24	7726.57	0.160465	V2910.5	3417	499	394	1.41461	0.157183	1.41461	0.157183	74	14	0.160483		V2910.5	3338	317	251	2.04246	0.0411066	2.04246	0.0411066	74	11	0.0406026		V2910.5	188	137	71	0.328469	0.742557	0.328469	0.742557	14	11	0.767498
1296.16	7715.07	0.160704	V2910	3417	499	394	1.41461	0.157183	1.41461	0.157183	74	14	0.160483		V2910	3338	317	251	2.04246	0.0411066	2.04246	0.0411066	74	11	0.0406026		V2910	188	137	71	0.328469	0.742557	0.328469	0.742557	14	11	0.767498
1298.09	7703.61	0.160943	V2909.5	3415	501	396	1.3918	0.163985	1.3918	0.163985	74	14	0.167467		V2909.5	3338	317	251	2.04246	0.0411066	2.04246	0.0411066	74	11	0.0406026		V2909.5	189	136	70	0.383214	0.701561	0.383214	0.701561	14	11	0.726735
1300.02	7692.18	0.161182	V2909	3414	502	397	1.38039	0.167468	1.38039	0.167468	74	14	0.171041		V2909	3338	317	251	2.04246	0.0411066	2.04246	0.0411066	74	11	0.0406026		V2909	189	136	70	0.383214	0.701561	0.383214	0.701561	14	11	0.726735
1301.95	7680.78	0.161421	V2908.5	3416	500	395	1.4032	0.160557	1.4032	0.160557	74	14	0.163948		V2908.5	3338	317	251	2.04246	0.0411066	2.04246	0.0411066	74	11	0.0406026		V2908.5	188	137	71	0.328469	0.742557	0.328469	0.742557	14	11	0.767498
1303.88	7669.42	0.16166	V2908	3417	499	394	1.41461	0.157183	1.41461	0.157183	74	14	0.160483		V2908	3338	317	251	2.04246	0.0411066	2.04246	0.0411066	74	11	0.0406026		V2908	187	138	72	0.273724	0.784297	0.273724	0.784297	14	11	0.808899
1305.81	7658.09	0.1619	V2907.5	3417	499	394	1.41461	0.157183	1.41461	0.157183	74	14	0.160483		V2907.5	3338	317	251	2.04246	0.0411066	2.04246	0.0411066	74	11	0.0406026		V2907.5	187	138	72	0.273724	0.784297	0.273724	0.784297	14	11	0.808899
1307.74	7646.8	0.162139	V2907	3418	498	393	1.42602	0.153863	1.42602	0.153863	74	14	0.157073		V2907	3338	317	251	2.04246	0.0411066	2.04246	0.0411066	74	11	0.0406026		V2907	187	138	72	0.273724	0.784297	0.273724	0.784297	14	11	0.808899
1309.67	7635.53	0.162378	V2906.5	3415	501	396	1.3918	0.163985	1.3918	0.163985	74	14	0.167467		V2906.5	3339	316	250	2.05555	0.0398263	2.05555	0.0398263	74	11	0.0392747		V2906.5	186	139	73	0.21898	0.826666	0.21898	0.826666	14	11	0.850813
1311.59	7624.31	0.162617	V2906	3415	501	396	1.3918	0.163985	1.3918	0.163985	74	14	0.167467		V2906	3339	316	250	2.05555	0.0398263	2.05555	0.0398263	74	11	0.0392747		V2906	186	139	73	0.21898	0.826666	0.21898	0.826666	14	11	0.850813
1313.52	7613.11	0.162856	V2905.5	3416	500	395	1.4032	0.160557	1.4032	0.160557	74	14	0.163948		V2905.5	3339	316	250	2.05555	0.0398263	2.05555	0.0398263	74	11	0.0392747		V2905.5	185	140	74	0.164235	0.869547	0.164235	0.869547	14	11	0.893146
1315.45	7601.95	0.163095	V2905	3418	498	393	1.42602	0.153863	1.42602	0.153863	74	14	0.157073		V2905	3338	317	251	2.04246	0.0411066	2.04246	0.0411066	74	11	0.0406026		V2905	185	140	74	0.164235	0.869547	0.164235	0.869547	14	11	0.893146
1317.38	7590.82	0.163334	V2904.5	3418	498	393	1.42602	0.153863	1.42602	0.153863	74	14	0.157073		V2904.5	3339	316	250	2.05555	0.0398263	2.05555	0.0398263	74	11	0.0392747		V2904.5	185	140	74	0.164235	0.869547	0.164235	0.869547	14	11	0.893146
1319.31	7579.72	0.163574	V2904	3418	498	393	1.42602	0.153863	1.42602	0.153863	74	14	0.157073		V2904	3339	316	250	2.05555	0.0398263	2.05555	0.0398263	74	11	0.0392747		V2904	186	139	73	0.21898	0.826666	0.21898	0.826666	14	11	0.850813
1321.24	7568.65	0.163813	V2903.5	3417	499	394	1.41461	0.157183	1.41461	0.157183	74	14	0.160483		V2903.5	3339	316	250	2.05555	0.0398263	2.05555	0.0398263	74	11	0.0392747		V2903.5	186	139	73	0.21898	0.826666	0.21898	0.826666	14	11	0.850813
1323.17	7557.62	0.164052	V2903	3416	500	395	1.4032	0.160557	1.4032	0.160557	74	14	0.163948		V2903	3339	316	250	2.05555	0.0398263	2.05555	0.0398263	74	11	0.0392747		V2903	186	139	73	0.21898	0.826666	0.21898	0.826666	14	11	0.850813
1325.1	7546.62	0.164291	V2902.5	3416	500	395	1.4032	0.160557	1.4032	0.160557	74	14	0.163948		V2902.5	3339	316	250	2.05555	0.0398263	2.05555	0.0398263	74	11	0.0392747		V2902.5	185	140	74	0.164235	0.869547	0.164235	0.869547	14	11	0.893146
1327.03	7535.65	0.16453	V2902	3416	500	395	1.4032	0.160557	1.4032	0.160557	74	14	0.163948		V2902	3339	316	250	2.05555	0.0398263	2.05555	0.0398263	74	11	0.0392747		V2902	186	139	73	0.21898	0.826666	0.21898	0.826666	14	11	0.850813
1328.95	7524.71	0.164769	V2901.5	3416	500	395	1.4032	0.160557	1.4032	0.160557	74	14	0.163948		V2901.5	3339	316	250	2.05555	0.0398263	2.05555	0.0398263	74	11	0.0392747		V2901.5	186	139	73	0.21898	0.826666	0.21898	0.826666	14	11	0.850813
1330.88	7513.81	0.165008	V2901	3416	500	395	1.4032	0.160557	1.4032	0.160557	74	14	0.163948		V2901	3339	316	250	2.05555	0.0398263	2.05555	0.0398263	74	11	0.0392747		V2901	186	139	73	0.21898	0.826666	0.21898	0.826666	14	11	0.850813
1332.81	7502.93	0.165248	V2900.5	3418	498	393	1.42602	0.153863	1.42602	0.153863	74	14	0.157073		V2900.5	3339	316	250	2.05555	0.0398263	2.05555	0.0398263	74	11	0.0392747		V2900.5	186	139	73	0.21898	0.826666	0.21898	0.826666	14	11	0.850813
1334.74	7492.09	0.165487	V2900	3418	498	393	1.42602	0.153863	1.42602	0.153863	74	14	0.157073		V2900	3338	317	251	2.04246	0.0411066	2.04246	0.0411066	74	11	0.0406026		V2900	186	139	73	0.21898	0.826666	0.21898	0.826666	14	11	0.850813
1336.67	7481.28	0.165726	V2899.5	3418	498	393	1.42602	0.153863	1.42602	0.153863	74	14	0.157073		V2899.5	3339	316	250	2.05555	0.0398263	2.05555	0.0398263	74	11	0.0392747		V2899.5	185	140	74	0.164235	0.869547	0.164235	0.869547	14	11	0.893146
1338.6	7470.5	0.165965	V2899	3419	497	392	1.43743	0.150597	1.43743	0.150597	74	14	0.153717		V2899	3340	315	249	2.06865	0.0385801	2.06865	0.0385801	74	11	0.0379828		V2899	185	140	74	0.164235	0.869547	0.164235	0.869547	14	11	0.893146
1340.53	7459.75	0.166204	V2898.5	3416	500	395	1.4032	0.160557	1.4032	0.160557	74	14	0.163948		V2898.5	3342	313	247	2.09483	0.0361867	2.09483	0.0361867	74	11	0.0355039		V2898.5	186	139	73	0.21898	0.826666	0.21898	0.826666	14	11	0.850813
1342.46	7449.03	0.166443	V2898	3416	500	395	1.4032	0.160557	1.4032	0.160557	74	14	0.163948		V2898	3340	315	249	2.06865	0.0385801	2.06865	0.0385801	74	11	0.0379828		V2898	186	139	73	0.21898	0.826666	0.21898	0.826666	14	11	0.850813
1344.38	7438.35	0.166682	V2897.5	3418	498	393	1.42602	0.153863	1.42602	0.153863	74	14	0.157073		V2897.5	3340	315	249	2.06865	0.0385801	2.06865	0.0385801	74	11	0.0379828		V2897.5	185	140	74	0.164235	0.869547	0.164235	0.869547	14	11	0.893146
1346.31	7427.69	0.166922	V2897	3419	497	392	1.43743	0.150597	1.43743	0.150597	74	14	0.153717		V2897	3340	315	249	2.06865	0.0385801	2.06865	0.0385801	74	11	0.0379828		V2897	185	140	74	0.164235	0.869547	0.164235	0.869547	14	11	0.893146
1348.24	7417.06	0.167161	V2896.5	3421	495	390	1.46024	0.144224	1.46024	0.144224	74	14	0.147165		V2896.5	3341	314	248	2.08174	0.0373671	2.08174	0.0373671	74	11	0.0367261		V2896.5	186	139	73	0.21898	0.826666	0.21898	0.826666	14	11	0.850813
1350.17	7406.47	0.1674	V2896	3420	496	391	1.44884	0.147384	1.44884	0.147384	74	14	0.150415		V2896	3341	314	248	2.08174	0.0373671	2.08174	0.0373671	74	11	0.0367261		V2896	186	139	73	0.21898	0.826666	0.21898	0.826666	14	11	0.850813
1352.1	7395.9	0.167639	V2895.5	3421	495	390	1.46024	0.144224	1.46024	0.144224	74	14	0.147165		V2895.5	3341	314	248	2.08174	0.0373671	2.08174	0.0373671	74	11	0.0367261		V2895.5	186	139	73	0.21898	0.826666	0.21898	0.826666	14	11	0.850813
1354.03	7385.37	0.167878	V2895	3421	495	390	1.46024	0.144224	1.46024	0.144224	74	14	0.147165		V2895	3341	314	248	2.08174	0.0373671	2.08174	0.0373671	74	11	0.0367261		V2895	186	139	73	0.21898	0.826666	0.21898	0.826666	14	11	0.850813
1355.96	7374.86	0.168117	V2894.5	3420	496	391	1.44884	0.147384	1.44884	0.147384	74	14	0.150415		V2894.5	3341	314	248	2.08174	0.0373671	2.08174	0.0373671	74	11	0.0367261		V2894.5	186	139	73	0.21898	0.826666	0.21898	0.826666	14	11	0.850813
1357.89	7364.39	0.168356	V2894	3421	495	390	1.46024	0.144224	1.46024	0.144224	74	14	0.147165		V2894	3341	314	248	2.08174	0.0373671	2.08174	0.0373671	74	11	0.0367261		V2894	185	140	74	0.164235	0.869547	0.164235	0.869547	14	11	0.893146
1359.82	7353.94	0.168596	V2893.5	3422	494	389	1.47165	0.141116	1.47165	0.141116	74	14	0.143969		V2893.5	3341	314	248	2.08174	0.0373671	2.08174	0.0373671	74	11	0.0367261		V2893.5	185	140	74	0.164235	0.869547	0.164235	0.869547	14	11	0.893146
1361.74	7343.52	0.168835	V2893	3420	496	391	1.44884	0.147384	1.44884	0.147384	74	14	0.150415		V2893	3342	313	247	2.09483	0.0361867	2.09483	0.0361867	74	11	0.0355039		V2893	186	139	73	0.21898	0.826666	0.21898	0.826666	14	11	0.850813
1363.67	7333.14	0.169074	V2892.5	3420	496	391	1.44884	0.147384	1.44884	0.147384	74	14	0.150415		V2892.5	3342	313	247	2.09483	0.0361867	2.09483	0.0361867	74	11	0.0355039		V2892.5	187	138	72	0.273724	0.784297	0.273724	0.784297	14	11	0.808899
1365.6	7322.78	0.169313	V2892	3421	495	390	1.46024	0.144224	1.46024	0.144224	74	14	0.147165		V2892	3341	314	248	2.08174	0.0373671	2.08174	0.0373671	74	11	0.0367261		V2892	187	138	72	0.273724	0.784297	0.273724	0.784297	14	11	0.808899
1367.53	7312.45	0.169552	V2891.5	3421	495	390	1.46024	0.144224	1.46024	0.144224	74	14	0.147165		V2891.5	3341	314	248	2.08174	0.0373671	2.08174	0.0373671	74	11	0.0367261		V2891.5	187	138	72	0.273724	0.784297	0.273724	0.784297	14	11	0.808899
1369.46	7302.15	0.169791	V2891	3421	495	390	1.46024	0.144224	1.46024	0.144224	74	14	0.147165		V2891	3342	313	247	2.09483	0.0361867	2.09483	0.0361867	74	11	0.0355039		V2891	187	138	72	0.273724	0.784297	0.273724	0.784297	14	11	0.808899
1371.39	7291.88	0.17003	V2890.5	3421	495	390	1.46024	0.144224	1.46024	0.144224	74	14	0.147165		V2890.5	3341	314	248	2.08174	0.0373671	2.08174	0.0373671	74	11	0.0367261		V2890.5	186	139	73	0.21898	0.826666	0.21898	0.826666	14	11	0.850813
1373.32	7281.64	0.17027	V2890	3421	495	390	1.46024	0.144224	1.46024	0.144224	74	14	0.147165		V2890	3342	313	247	2.09483	0.0361867	2.09483	0.0361867	74	11	0.0355039		V2890	186	139	73	0.21898	0.826666	0.21898	0.826666	14	11	0.850813
1375.25	7271.43	0.170509	V2889.5	3420	496	391	1.44884	0.147384	1.44884	0.147384	74	14	0.150415		V2889.5	3342	313	247	2.09483	0.0361867	2.09483	0.0361867	74	11	0.0355039		V2889.5	185	140	74	0.164235	0.869547	0.164235	0.869547	14	11	0.893146
1377.17	7261.24	0.170748	V2889	3421	495	390	1.46024	0.144224	1.46024	0.144224	74	14	0.147165		V2889	3342	313	247	2.09483	0.0361867	2.09483	0.0361867	74	11	0.0355039		V2889	186	139	73	0.21898	0.826666	0.21898	0.826666	14	11	0.850813
1379.1	7251.09	0.170987	V2888.5	3420	496	391	1.44884	0.147384	1.44884	0.147384	74	14	0.150415		V2888.5	3342	313	247	2.09483	0.0361867	2.09483	0.0361867	74	11	0.0355039		V2888.5	186	139	73	0.21898	0.826666	0.21898	0.826666	14	11	0.850813
1381.03	7240.96	0.171226	V2888	3420	496	391	1.44884	0.147384	1.44884	0.147384	74	14	0.150415		V2888	3341	314	248	2.08174	0.0373671	2.08174	0.0373671	74	11	0.0367261		V2888	186	139	73	0.21898	0.826666	0.21898	0.826666	14	11	0.850813
1382.96	7230.86	0.171465	V2887.5	3420	496	391	1.44884	0.147384	1.44884	0.147384	74	14	0.150415		V2887.5	3341	314	248	2.08174	0.0373671	2.08174	0.0373671	74	11	0.0367261		V2887.5	187	138	72	0.273724	0.784297	0.273724	0.784297	14	11	0.808899
1384.89	7220.79	0.171704	V2887	3420	496	391	1.44884	0.147384	1.44884	0.147384	74	14	0.150415		V2887	3341	314	248	2.08174	0.0373671	2.08174	0.0373671	74	11	0.0367261		V2887	186	139	73	0.21898	0.826666	0.21898	0.826666	14	11	0.850813
1386.82	7210.75	0.171944	V2886.5	3422	494	389	1.47165	0.141116	1.47165	0.141116	74	14	0.143969		V2886.5	3342	313	247	2.09483	0.0361867	2.09483	0.0361867	74	11	0.0355039		V2886.5	184	141	75	0.10949	0.912814	0.10949	0.912814	14	11	0.935765
1388.75	7200.73	0.172183	V2886	3422	494	389	1.47165	0.141116	1.47165	0.141116	74	14	0.143969		V2886	3342	313	247	2.09483	0.0361867	2.09483	0.0361867	74	11	0.0355039		V2886	185	140	74	0.164235	0.869547	0.164235	0.869547	14	11	0.893146
1390.68	7190.75	0.172422	V2885.5	3422	494	389	1.47165	0.141116	1.47165	0.141116	74	14	0.143969		V2885.5	3342	313	247	2.09483	0.0361867	2.09483	0.0361867	74	11	0.0355039		V2885.5	186	139	73	0.21898	0.826666	0.21898	0.826666	14	11	0.850813
1392.61	7180.79	0.172661	V2885	3424	492	387	1.49447	0.135054	1.49447	0.135054	74	14	0.137732		V2885	3341	314	248	2.08174	0.0373671	2.08174	0.0373671	74	11	0.0367261		V2885	184	141	75	0.10949	0.912814	0.10949	0.912814	14	11	0.935765
1394.53	7170.85	0.1729	V2884.5	3423	493	388	1.48306	0.138059	1.48306	0.138059	74	14	0.140824		V2884.5	3342	313	247	2.09483	0.0361867	2.09483	0.0361867	74	11	0.0355039		V2884.5	185	140	74	0.164235	0.869547	0.164235	0.869547	14	11	0.893146
1396.46	7160.95	0.173139	V2884	3424	492	387	1.49447	0.135054	1.49447	0.135054	74	14	0.137732		V2884	3342	313	247	2.09483	0.0361867	2.09483	0.0361867	74	11	0.0355039		V2884	185	140	74	0.164235	0.869547	0.164235	0.869547	14	11	0.893146
1398.39	7151.07	0.173378	V2883.5	3424	492	387	1.49447	0.135054	1.49447	0.135054	74	14	0.137732		V2883.5	3342	313	247	2.09483	0.0361867	2.09483	0.0361867	74	11	0.0355039		V2883.5	185	140	74	0.164235	0.869547	0.164235	0.869547	14	11	0.893146
1400.32	7141.22	0.173618	V2883	3422	494	389	1.47165	0.141116	1.47165	0.141116	74	14	0.143969		V2883	3342	313	247	2.09483	0.0361867	2.09483	0.0361867	74	11	0.0355039		V2883	185	140	74	0.164235	0.869547	0.164235	0.869547	14	11	0.893146
1402.25	7131.4	0.173857	V2882.5	3424	492	387	1.49447	0.135054	1.49447	0.135054	74	14	0.137732		V2882.5	3342	313	247	2.09483	0.0361867	2.09483	0.0361867	74	11	0.0355039		V2882.5	185	140	74	0.164235	0.869547	0.164235	0.869547	14	11	0.893146
1404.18	7121.6	0.174096	V2882	3426	490	385	1.51729	0.129196	1.51729	0.129196	74	14	0.131701		V2882	3342	313	247	2.09483	0.0361867	2.09483	0.0361867	74	11	0.0355039		V2882	185	140	74	0.164235	0.869547	0.164235	0.869547	14	11	0.893146
1406.11	7111.83	0.174335	V2881.5	3426	490	385	1.51729	0.129196	1.51729	0.129196	74	14	0.131701		V2881.5	3342	313	247	2.09483	0.0361867	2.09483	0.0361867	74	11	0.0355039		V2881.5	185	140	74	0.164235	0.869547	0.164235	0.869547	14	11	0.893146
1408.04	7102.09	0.174574	V2881	3425	491	386	1.50588	0.1321	1.50588	0.1321	74	14	0.134691		V2881	3342	313	247	2.09483	0.0361867	2.09483	0.0361867	74	11	0.0355039		V2881	186	139	73	0.21898	0.826666	0.21898	0.826666	14	11	0.850813
1409.96	7092.38	0.174813	V2880.5	3425	491	386	1.50588	0.1321	1.50588	0.1321	74	14	0.134691		V2880.5	3342	313	247	2.09483	0.0361867	2.09483	0.0361867	74	11	0.0355039		V2880.5	186	139	73	0.21898	0.826666	0.21898	0.826666	14	11	0.850813
1411.89	7082.69	0.175052	V2880	3425	491	386	1.50588	0.1321	1.50588	0.1321	74	14	0.134691		V2880	3342	313	247	2.09483	0.0361867	2.09483	0.0361867	74	11	0.0355039		V2880	186	139	73	0.21898	0.826666	0.21898	0.826666	14	11	0.850813
1413.82	7073.03	0.175292	V2879.5	3428	488	383	1.5401	0.123536	1.5401	0.123536	74	14	0.125872		V2879.5	3342	313	247	2.09483	0.0361867	2.09483	0.0361867	74	11	0.0355039		V2879.5	185	140	74	0.164235	0.869547	0.164235	0.869547	14	11	0.893146
1415.75	7063.39	0.175531	V2879	3430	486	381	1.56292	0.118073	1.56292	0.118073	74	14	0.120241		V2879	3341	314	248	2.08174	0.0373671	2.08174	0.0373671	74	11	0.0367261		V2879	184	141	75	0.10949	0.912814	0.10949	0.912814	14	11	0.935765
1417.68	7053.78	0.17577	V2878.5	3428	488	383	1.5401	0.123536	1.5401	0.123536	74	14	0.125872		V2878.5	3341	314	248	2.08174	0.0373671	2.08174	0.0373671	74	11	0.0367261		V2878.5	184	141	75	0.10949	0.912814	0.10949	0.912814	14	11	0.935765
1419.61	7044.2	0.176009	V2878	3424	492	387	1.49447	0.135054	1.49447	0.135054	74	14	0.137732		V2878	3341	314	248	2.08174	0.0373671	2.08174	0.0373671	74	11	0.0367261		V2878	185	140	74	0.164235	0.869547	0.164235	0.869547	14	11	0.893146
1421.54	7034.64	0.176248	V2877.5	3428	488	383	1.5401	0.123536	1.5401	0.123536	74	14	0.125872		V2877.5	3341	314	248	2.08174	0.0373671	2.08174	0.0373671	74	11	0.0367261		V2877.5	185	140	74	0.164235	0.869547	0.164235	0.869547	14	11	0.893146
1423.47	7025.11	0.176487	V2877	3428	488	383	1.5401	0.123536	1.5401	0.123536	74	14	0.125872		V2877	3341	314	248	2.08174	0.0373671	2.08174	0.0373671	74	11	0.0367261		V2877	185	140	74	0.164235	0.869547	0.164235	0.869547	14	11	0.893146
1425.4	7015.6	0.176726	V2876.5	3427	489	384	1.52869	0.126341	1.52869	0.126341	74	14	0.128761		V2876.5	3341	314	248	2.08174	0.0373671	2.08174	0.0373671	74	11	0.0367261		V2876.5	185	140	74	0.164235	0.869547	0.164235	0.869547	14	11	0.893146
1427.32	7006.12	0.176966	V2876	3431	485	380	1.57433	0.115413	1.57433	0.115413	74	14	0.117499		V2876	3340	315	249	2.06865	0.0385801	2.06865	0.0385801	74	11	0.0379828		V2876	185	140	74	0.164235	0.869547	0.164235	0.869547	14	11	0.893146
1429.25	6996.66	0.177205	V2875.5	3431	485	380	1.57433	0.115413	1.57433	0.115413	74	14	0.117499		V2875.5	3341	314	248	2.08174	0.0373671	2.08174	0.0373671	74	11	0.0367261		V2875.5	185	140	74	0.164235	0.869547	0.164235	0.869547	14	11	0.893146
1431.18	6987.23	0.177444	V2875	3429	487	382	1.55151	0.12078	1.55151	0.12078	74	14	0.123032		V2875	3341	314	248	2.08174	0.0373671	2.08174	0.0373671	74	11	0.0367261		V2875	185	140	74	0.164235	0.869547	0.164235	0.869547	14	11	0.893146
1433.11	6977.83	0.177683	V2874.5	3431	485	380	1.57433	0.115413	1.57433	0.115413	74	14	0.117499		V2874.5	3341	314	248	2.08174	0.0373671	2.08174	0.0373671	74	11	0.0367261		V2874.5	185	140	74	0.164235	0.869547	0.164235	0.869547	14	11	0.893146
1435.04	6968.45	0.177922	V2874	3430	486	381	1.56292	0.118073	1.56292	0.118073	74	14	0.120241		V2874	3341	314	248	2.08174	0.0373671	2.08174	0.0373671	74	11	0.0367261		V2874	185	140	74	0.164235	0.869547	0.164235	0.869547	14	11	0.893146
1436.97	6959.1	0.178161	V2873.5	3427	489	384	1.52869	0.126341	1.52869	0.126341	74	14	0.128761		V2873.5	3342	313	247	2.09483	0.0361867	2.09483	0.0361867	74	11	0.0355039		V2873.5	185	140	74	0.164235	0.869547	0.164235	0.869547	14	11	0.893146
1438.9	6949.77	0.1784	V2873	3428	488	383	1.5401	0.123536	1.5401	0.123536	74	14	0.125872		V2873	3341	314	248	2.08174	0.0373671	2.08174	0.0373671	74	11	0.0367261		V2873	185	140	74	0.164235	0.869547	0.164235	0.869547	14	11	0.893146
1440.83	6940.47	0.17864	V2872.5	3430	486	381	1.56292	0.118073	1.56292	0.118073	74	14	0.120241		V2872.5	3340	315	249	2.06865	0.0385801	2.06865	0.0385801	74	11	0.0379828		V2872.5	186	139	73	0.21898	0.826666	0.21898	0.826666	14	11	0.850813
1442.75	6931.19	0.178879	V2872	3430	486	381	1.56292	0.118073	1.56292	0.118073	74	14	0.120241		V2872	3341	314	248	2.08174	0.0373671	2.08174	0.0373671	74	11	0.0367261		V2872	185	140	74	0.164235	0.869547	0.164235	0.869547	14	11	0.893146
1444.68	6921.93	0.179118	V2871.5	3431	485	380	1.57433	0.115413	1.57433	0.115413	74	14	0.117499		V2871.5	3340	315	249	2.06865	0.0385801	2.06865	0.0385801	74	11	0.0379828		V2871.5	185	140	74	0.164235	0.869547	0.164235	0.869547	14	11	0.893146
1446.61	6912.7	0.179357	V2871	3433	483	378	1.59714	0.110235	1.59714	0.110235	74	14	0.112159		V2871	3340	315	249	2.06865	0.0385801	2.06865	0.0385801	74	11	0.0379828		V2871	185	140	74	0.164235	0.869547	0.164235	0.869547	14	11	0.893146
1448.54	6903.5	0.179596	V2870.5	3431	485	380	1.57433	0.115413	1.57433	0.115413	74	14	0.117499		V2870.5	3341	314	248	2.08174	0.0373671	2.08174	0.0373671	74	11	0.0367261		V2870.5	187	138	72	0.273724	0.784297	0.273724	0.784297	14	11	0.808899
1450.47	6894.32	0.179835	V2870	3432	484	379	1.58573	0.1128	1.58573	0.1128	74	14	0.114805		V2870	3341	314	248	2.08174	0.0373671	2.08174	0.0373671	74	11	0.0367261		V2870	185	140	74	0.164235	0.869547	0.164235	0.869547	14	11	0.893146
1452.4	6885.16	0.180074	V2869.5	3433	483	378	1.59714	0.110235	1.59714	0.110235	74	14	0.112159		V2869.5	3340	315	249	2.06865	0.0385801	2.06865	0.0385801	74	11	0.0379828		V2869.5	185	140	74	0.164235	0.869547	0.164235	0.869547	14	11	0.893146
1454.33	6876.03	0.180314	V2869	3433	483	378	1.59714	0.110235	1.59714	0.110235	74	14	0.112159		V2869	3337	318	252	2.02937	0.0424216	2.02937	0.0424216	74	11	0.0419671		V2869	184	141	75	0.10949	0.912814	0.10949	0.912814	14	11	0.935765
1456.26	6866.92	0.180553	V2868.5	3433	483	378	1.59714	0.110235	1.59714	0.110235	74	14	0.112159		V2868.5	3339	316	250	2.05555	0.0398263	2.05555	0.0398263	74	11	0.0392747		V2868.5	185	140	74	0.164235	0.869547	0.164235	0.869547	14	11	0.893146
1458.18	6857.84	0.180792	V2868	3429	487	382	1.55151	0.12078	1.55151	0.12078	74	14	0.123032		V2868	3340	315	249	2.06865	0.0385801	2.06865	0.0385801	74	11	0.0379828		V2868	186	139	73	0.21898	0.826666	0.21898	0.826666	14	11	0.850813
1460.11	6848.78	0.181031	V2867.5	3431	485	380	1.57433	0.115413	1.57433	0.115413	74	14	0.117499		V2867.5	3341	314	248	2.08174	0.0373671	2.08174	0.0373671	74	11	0.0367261		V2867.5	185	140	74	0.164235	0.869547	0.164235	0.869547	14	11	0.893146
1462.04	6839.75	0.18127	V2867	3436	480	375	1.63137	0.102814	1.63137	0.102814	74	14	0.104502		V2867	3340	315	249	2.06865	0.0385801	2.06865	0.0385801	74	11	0.0379828		V2867	185	140	74	0.164235	0.869547	0.164235	0.869547	14	11	0.893146
1463.97	6830.73	0.181509	V2866.5	3434	482	377	1.60855	0.107716	1.60855	0.107716	74	14	0.10956		V2866.5	3340	315	249	2.06865	0.0385801	2.06865	0.0385801	74	11	0.0379828		V2866.5	185	140	74	0.164235	0.869547	0.164235	0.869547	14	11	0.893146
1465.9	6821.75	0.181748	V2866	3432	484	379	1.58573	0.1128	1.58573	0.1128	74	14	0.114805		V2866	3341	314	248	2.08174	0.0373671	2.08174	0.0373671	74	11	0.0367261		V2866	185	140	74	0.164235	0.869547	0.164235	0.869547	14	11	0.893146
1467.83	6812.78	0.181988	V2865.5	3436	480	375	1.63137	0.102814	1.63137	0.102814	74	14	0.104502		V2865.5	3340	315	249	2.06865	0.0385801	2.06865	0.0385801	74	11	0.0379828		V2865.5	185	140	74	0.164235	0.869547	0.164235	0.869547	14	11	0.893146
1469.76	6803.84	0.182227	V2865	3434	482	377	1.60855	0.107716	1.60855	0.107716	74	14	0.10956		V2865	3338	317	251	2.04246	0.0411066	2.04246	0.0411066	74	11	0.0406026		V2865	185	140	74	0.164235	0.869547	0.164235	0.869547	14	11	0.893146
1471.69	6794.92	0.182466	V2864.5	3435	481	376	1.61996	0.105242	1.61996	0.105242	74	14	0.107008		V2864.5	3338	317	251	2.04246	0.0411066	2.04246	0.0411066	74	11	0.0406026		V2864.5	185	140	74	0.164235	0.869547	0.164235	0.869547	14	11	0.893146
1473.62	6786.03	0.182705	V2864	3433	483	378	1.59714	0.110235	1.59714	0.110235	74	14	0.112159		V2864	3339	316	250	2.05555	0.0398263	2.05555	0.0398263	74	11	0.0392747		V2864	185	140	74	0.164235	0.869547	0.164235	0.869547	14	11	0.893146
1475.54	6777.16	0.182944	V2863.5	3434	482	377	1.60855	0.107716	1.60855	0.107716	74	14	0.10956		V2863.5	3339	316	250	2.05555	0.0398263	2.05555	0.0398263	74	11	0.0392747		V2863.5	185	140	74	0.164235	0.869547	0.164235	0.869547	14	11	0.893146
1477.47	6768.31	0.183183	V2863	3435	481	376	1.61996	0.105242	1.61996	0.105242	74	14	0.107008		V2863	3339	316	250	2.05555	0.0398263	2.05555	0.0398263	74	11	0.0392747		V2863	186	139	73	0.21898	0.826666	0.21898	0.826666	14	11	0.850813
1479.4	6759.49	0.183422	V2862.5	3437	479	374	1.64278	0.10043	1.64278	0.10043	74	14	0.102042		V2862.5	3339	316	250	2.05555	0.0398263	2.05555	0.0398263	74	11	0.0392747		V2862.5	187	138	72	0.273724	0.784297	0.273724	0.784297	14	11	0.808899
1481.33	6750.69	0.183662	V2862	3437	479	374	1.64278	0.10043	1.64278	0.10043	74	14	0.102042		V2862	3340	315	249	2.06865	0.0385801	2.06865	0.0385801	74	11	0.0379828		V2862	185	140	74	0.164235	0.869547	0.164235	0.869547	14	11	0.893146
1483.26	6741.91	0.183901	V2861.5	3439	477	372	1.66559	0.0957957	1.66559	0.0957957	74	14	0.0972574		V2861.5	3340	315	249	2.06865	0.0385801	2.06865	0.0385801	74	11	0.0379828		V2861.5	185	140	74	0.164235	0.869547	0.164235	0.869547	14	11	0.893146
1485.19	6733.15	0.18414	V2861	3439	477	372	1.66559	0.0957957	1.66559	0.0957957	74	14	0.0972574		V2861	3337	318	252	2.02937	0.0424216	2.02937	0.0424216	74	11	0.0419671		V2861	185	140	74	0.164235	0.869547	0.164235	0.869547	14	11	0.893146
1487.12	6724.42	0.184379	V2860.5	3436	480	375	1.63137	0.102814	1.63137	0.102814	74	14	0.104502		V2860.5	3338	317	251	2.04246	0.0411066	2.04246	0.0411066	74	11	0.0406026		V2860.5	185	140	74	0.164235	0.869547	0.164235	0.869547	14	11	0.893146
1489.05	6715.71	0.184618	V2860	3433	483	378	1.59714	0.110235	1.59714	0.110235	74	14	0.112159		V2860	3339	316	250	2.05555	0.0398263	2.05555	0.0398263	74	11	0.0392747		V2860	185	140	74	0.164235	0.869547	0.164235	0.869547	14	11	0.893146
1490.97	6707.02	0.184857	V2859.5	3431	485	380	1.57433	0.115413	1.57433	0.115413	74	14	0.117499		V2859.5	3339	316	250	2.05555	0.0398263	2.05555	0.0398263	74	11	0.0392747		V2859.5	186	139	73	0.21898	0.826666	0.21898	0.826666	14	11	0.850813
1492.9	6698.36	0.185096	V2859	3437	479	374	1.64278	0.10043	1.64278	0.10043	74	14	0.102042		V2859	3339	316	250	2.05555	0.0398263	2.05555	0.0398263	74	11	0.0392747		V2859	186	139	73	0.21898	0.826666	0.21898	0.826666	14	11	0.850813
1494.83	6689.71	0.185336	V2858.5	3437	479	374	1.64278	0.10043	1.64278	0.10043	74	14	0.102042		V2858.5	3337	318	252	2.02937	0.0424216	2.02937	0.0424216	74	11	0.0419671		V2858.5	185	140	74	0.164235	0.869547	0.164235	0.869547	14	11	0.893146
1496.76	6681.09	0.185575	V2858	3439	477	372	1.66559	0.0957957	1.66559	0.0957957	74	14	0.0972574		V2858	3338	317	251	2.04246	0.0411066	2.04246	0.0411066	74	11	0.0406026		V2858	185	140	74	0.164235	0.869547	0.164235	0.869547	14	11	0.893146
1498.69	6672.49	0.185814	V2857.5	3439	477	372	1.66559	0.0957957	1.66559	0.0957957	74	14	0.0972574		V2857.5	3339	316	250	2.05555	0.0398263	2.05555	0.0398263	74	11	0.0392747		V2857.5	187	138	72	0.273724	0.784297	0.273724	0.784297	14	11	0.808899
1500.62	6663.92	0.186053	V2857	3441	475	370	1.68841	0.0913339	1.68841	0.0913339	74	14	0.0926495		V2857	3339	316	250	2.05555	0.0398263	2.05555	0.0398263	74	11	0.0392747		V2857	185	140	74	0.164235	0.869547	0.164235	0.869547	14	11	0.893146
1502.55	6655.36	0.186292	V2856.5	3440	476	371	1.677	0.0935434	1.677	0.0935434	74	14	0.0949316		V2856.5	3336	319	253	2.01628	0.043772	2.01628	0.043772	74	11	0.043369		V2856.5	185	140	74	0.164235	0.869547	0.164235	0.869547	14	11	0.893146
1504.48	6646.83	0.186531	V2856	3438	478	373	1.65418	0.0980912	1.65418	0.0980912	74	14	0.0996275		V2856	3336	319	253	2.01628	0.043772	2.01628	0.043772	74	11	0.043369		V2856	185	140	74	0.164235	0.869547	0.164235	0.869547	14	11	0.893146
1506.41	6638.32	0.18677	V2855.5	3435	481	376	1.61996	0.105242	1.61996	0.105242	74	14	0.107008		V2855.5	3340	315	249	2.06865	0.0385801	2.06865	0.0385801	74	11	0.0379828		V2855.5	185	140	74	0.164235	0.869547	0.164235	0.869547	14	11	0.893146
1508.33	6629.83	0.18701	V2855	3432	484	379	1.58573	0.1128	1.58573	0.1128	74	14	0.114805		V2855	3340	315	249	2.06865	0.0385801	2.06865	0.0385801	74	11	0.0379828		V2855	186	139	73	0.21898	0.826666	0.21898	0.826666	14	11	0.850813
1510.26	6621.36	0.187249	V2854.5	3434	482	377	1.60855	0.107716	1.60855	0.107716	74	14	0.10956		V2854.5	3340	315	249	2.06865	0.0385801	2.06865	0.0385801	74	11	0.0379828		V2854.5	185	140	74	0.164235	0.869547	0.164235	0.869547	14	11	0.893146
1512.19	6612.92	0.187488	V2854	3438	478	373	1.65418	0.0980912	1.65418	0.0980912	74	14	0.0996275		V2854	3338	317	251	2.04246	0.0411066	2.04246	0.0411066	74	11	0.0406026		V2854	185	140	74	0.164235	0.869547	0.164235	0.869547	14	11	0.893146
1514.12	6604.49	0.187727	V2853.5	3436	480	375	1.63137	0.102814	1.63137	0.102814	74	14	0.104502		V2853.5	3338	317	251	2.04246	0.0411066	2.04246	0.0411066	74	11	0.0406026		V2853.5	185	140	74	0.164235	0.869547	0.164235	0.869547	14	11	0.893146
1516.05	6596.09	0.187966	V2853	3435	481	376	1.61996	0.105242	1.61996	0.105242	74	14	0.107008		V2853	3339	316	250	2.05555	0.0398263	2.05555	0.0398263	74	11	0.0392747		V2853	185	140	74	0.164235	0.869547	0.164235	0.869547	14	11	0.893146
1517.98	6587.71	0.188205	V2852.5	3435	481	376	1.61996	0.105242	1.61996	0.105242	74	14	0.107008		V2852.5	3337	318	252	2.02937	0.0424216	2.02937	0.0424216	74	11	0.0419671		V2852.5	186	139	73	0.21898	0.826666	0.21898	0.826666	14	11	0.850813
1519.91	6579.35	0.188444	V2852	3437	479	374	1.64278	0.10043	1.64278	0.10043	74	14	0.102042		V2852	3339	316	250	2.05555	0.0398263	2.05555	0.0398263	74	11	0.0392747		V2852	186	139	73	0.21898	0.826666	0.21898	0.826666	14	11	0.850813
1521.84	6571.01	0.188684	NewVar1	3430	486	381	1.56292	0.118073	1.56292	0.118073	74	14	0.120241		NewVar1	3340	315	249	2.06865	0.0385801	2.06865	0.0385801	74	11	0.0379828		NewVar1	185	140	74	0.164235	0.869547	0.164235	0.869547	14	11	0.893146
1523.76	6562.69	0.188923	NewVar2	3435	481	376	1.61996	0.105242	1.61996	0.105242	74	14	0.107008		NewVar2	3340	315	249	2.06865	0.0385801	2.06865	0.0385801	74	11	0.0379828		NewVar2	185	140	74	0.164235	0.869547	0.164235	0.869547	14	11	0.893146
1525.69	6554.4	0.189162	NewVar3	3436	480	375	1.63137	0.102814	1.63137	0.102814	74	14	0.104502		NewVar3	3339	316	250	2.05555	0.0398263	2.05555	0.0398263	74	11	0.0392747		NewVar3	185	140	74	0.164235	0.869547	0.164235	0.869547	14	11	0.893146
1527.62	6546.12	0.189401	NewVar4	3433	483	378	1.59714	0.110235	1.59714	0.110235	74	14	0.112159		NewVar4	3339	316	250	2.05555	0.0398263	2.05555	0.0398263	74	11	0.0392747		NewVar4	185	140	74	0.164235	0.869547	0.164235	0.869547	14	11	0.893146
1529.55	6537.87	0.18964	NewVar5	3435	481	376	1.61996	0.105242	1.61996	0.105242	74	14	0.107008		NewVar5	3335	320	254	2.00318	0.0451585	2.00318	0.0451585	74	11	0.0448091		NewVar5	185	140	74	0.164235	0.869547	0.164235	0.869547	14	11	0.893146
1531.48	6529.63	0.189879	NewVar6	3435	481	376	1.61996	0.105242	1.61996	0.105242	74	14	0.107008		NewVar6	3335	320	254	2.00318	0.0451585	2.00318	0.0451585	74	11	0.0448091		NewVar6	185	140	74	0.164235	0.869547	0.164235	0.869547	14	11	0.893146
1533.41	6521.42	0.190118	NewVar7	3433	483	378	1.59714	0.110235	1.59714	0.110235	74	14	0.112159		NewVar7	3341	314	248	2.08174	0.0373671	2.08174	0.0373671	74	11	0.0367261		NewVar7	185	140	74	0.164235	0.869547	0.164235	0.869547	14	11	0.893146
1535.34	6513.23	0.190358	NewVar8	3432	484	379	1.58573	0.1128	1.58573	0.1128	74	14	0.114805		NewVar8	3339	316	250	2.05555	0.0398263	2.05555	0.0398263	74	11	0.0392747		NewVar8	186	139	73	0.21898	0.826666	0.21898	0.826666	14	11	0.850813
1537.27	6505.05	0.190597	NewVar9	3431	485	380	1.57433	0.115413	1.57433	0.115413	74	14	0.117499		NewVar9	3336	319	253	2.01628	0.043772	2.01628	0.043772	74	11	0.043369		NewVar9	185	140	74	0.164235	0.869547	0.164235	0.869547	14	11	0.893146
1539.2	6496.9	0.190836	NewVar10	3429	487	382	1.55151	0.12078	1.55151	0.12078	74	14	0.123032		NewVar10	3340	315	249	2.06865	0.0385801	2.06865	0.0385801	74	11	0.0379828		NewVar10	185	140	74	0.164235	0.869547	0.164235	0.869547	14	11	0.893146
1541.12	6488.77	0.191075	NewVar11	3430	486	381	1.56292	0.118073	1.56292	0.118073	74	14	0.120241		NewVar11	3341	314	248	2.08174	0.0373671	2.08174	0.0373671	74	11	0.0367261		NewVar11	186	139	73	0.21898	0.826666	0.21898	0.826666	14	11	0.850813
1543.05	6480.66	0.191314	NewVar12	3432	484	379	1.58573	0.1128	1.58573	0.1128	74	14	0.114805		NewVar12	3342	313	247	2.09483	0.0361867	2.09483	0.0361867	74	11	0.0355039		NewVar12	186	139	73	0.21898	0.826666	0.21898	0.826666	14	11	0.850813
1544.98	6472.57	0.191553	NewVar13	3431	485	380	1.57433	0.115413	1.57433	0.115413	74	14	0.117499		NewVar13	3341	314	248	2.08174	0.0373671	2.08174	0.0373671	74	11	0.0367261		NewVar13	186	139	73	0.21898	0.826666	0.21898	0.826666	14	11	0.850813
1546.91	6464.5	0.191792	NewVar14	3433	483	378	1.59714	0.110235	1.59714	0.110235	74	14	0.112159		NewVar14	3339	316	250	2.05555	0.0398263	2.05555	0.0398263	74	11	0.0392747		NewVar14	187	138	72	0.273724	0.784297	0.273724	0.784297	14	11	0.808899
1548.84	6456.45	0.192032	NewVar15	3433	483	378	1.59714	0.110235	1.59714	0.110235	74	14	0.112159		NewVar15	3340	315	249	2.06865	0.0385801	2.06865	0.0385801	74	11	0.0379828		NewVar15	186	139	73	0.21898	0.826666	0.21898	0.826666	14	11	0.850813
1550.77	6448.42	0.192271	NewVar16	3428	488	383	1.5401	0.123536	1.5401	0.123536	74	14	0.125872		NewVar16	3340	315	249	2.06865	0.0385801	2.06865	0.0385801	74	11	0.0379828		NewVar16	186	139	73	0.21898	0.826666	0.21898	0.826666	14	11	0.850813
1552.7	6440.41	0.19251	NewVar17	3426	490	385	1.51729	0.129196	1.51729	0.129196	74	14	0.131701		NewVar17	3340	315	249	2.06865	0.0385801	2.06865	0.0385801	74	11	0.0379828		NewVar17	184	141	75	0.10949	0.912814	0.10949	0.912814	14	11	0.935765
1554.63	6432.42	0.192749	NewVar18	3427	489	384	1.52869	0.126341	1.52869	0.126341	74	14	0.128761		NewVar18	3339	316	250	2.05555	0.0398263	2.05555	0.0398263	74	11	0.0392747		NewVar18	186	139	73	0.21898	0.826666	0.21898	0.826666	14	11	0.850813
1556.55	6424.45	0.192988	NewVar19	3428	488	383	1.5401	0.123536	1.5401	0.123536	74	14	0.125872		NewVar19	3338	317	251	2.04246	0.0411066	2.04246	0.0411066	74	11	0.0406026		NewVar19	185	140	74	0.164235	0.869547	0.164235	0.869547	14	11	0.893146
1558.48	6416.49	0.193227	NewVar20	3426	490	385	1.51729	0.129196	1.51729	0.129196	74	14	0.131701		NewVar20	3346	309	243	2.1472	0.0317779	2.1472	0.0317779	74	11	0.0309464		NewVar20	186	139	73	0.21898	0.826666	0.21898	0.826666	14	11	0.850813
1560.41	6408.56	0.193466	NewVar21	3423	493	388	1.48306	0.138059	1.48306	0.138059	74	14	0.140824		NewVar21	3344	311	245	2.12102	0.0339211	2.12102	0.0339211	74	11	0.0331603		NewVar21	186	139	73	0.21898	0.826666	0.21898	0.826666	14	11	0.850813
1562.34	6400.65	0.193706	NewVar22	3429	487	382	1.55151	0.12078	1.55151	0.12078	74	14	0.123032		NewVar22	3340	315	249	2.06865	0.0385801	2.06865	0.0385801	74	11	0.0379828		NewVar22	186	139	73	0.21898	0.826666	0.21898	0.826666	14	11	0.850813
1564.27	6392.76	0.193945	NewVar23	3428	488	383	1.5401	0.123536	1.5401	0.123536	74	14	0.125872		NewVar23	3339	316	250	2.05555	0.0398263	2.05555	0.0398263	74	11	0.0392747		NewVar23	187	138	72	0.273724	0.784297	0.273724	0.784297	14	11	0.808899
1566.2	6384.89	0.194184	NewVar24	3426	490	385	1.51729	0.129196	1.51729	0.129196	74	14	0.131701		NewVar24	3339	316	250	2.05555	0.0398263	2.05555	0.0398263	74	11	0.0392747		NewVar24	187	138	72	0.273724	0.784297	0.273724	0.784297	14	11	0.808899
1568.13	6377.03	0.194423	NewVar25	3426	490	385	1.51729	0.129196	1.51729	0.129196	74	14	0.131701		NewVar25	3340	315	249	2.06865	0.0385801	2.06865	0.0385801	74	11	0.0379828		NewVar25	188	137	71	0.328469	0.742557	0.328469	0.742557	14	11	0.767498
1570.06	6369.2	0.194662	NewVar26	3424	492	387	1.49447	0.135054	1.49447	0.135054	74	14	0.137732		NewVar26	3341	314	248	2.08174	0.0373671	2.08174	0.0373671	74	11	0.0367261		NewVar26	189	136	70	0.383214	0.701561	0.383214	0.701561	14	11	0.726735
1571.99	6361.38	0.194901	NewVar27	3427	489	384	1.52869	0.126341	1.52869	0.126341	74	14	0.128761		NewVar27	3339	316	250	2.05555	0.0398263	2.05555	0.0398263	74	11	0.0392747		NewVar27	187	138	72	0.273724	0.784297	0.273724	0.784297	14	11	0.808899
1573.91	6353.59	0.19514	NewVar28	3428	488	383	1.5401	0.123536	1.5401	0.123536	74	14	0.125872		NewVar28	3339	316	250	2.05555	0.0398263	2.05555	0.0398263	74	11	0.0392747		NewVar28	188	137	71	0.328469	0.742557	0.328469	0.742557	14	11	0.767498
1575.84	6345.81	0.19538	NewVar29	3427	489	384	1.52869	0.126341	1.52869	0.126341	74	14	0.128761		NewVar29	3341	314	248	2.08174	0.0373671	2.08174	0.0373671	74	11	0.0367261		NewVar29	191	134	68	0.492704	0.622222	0.492704	0.622222	14	11	0.647494
1577.77	6338.05	0.195619	NewVar30	3423	493	388	1.48306	0.138059	1.48306	0.138059	74	14	0.140824		NewVar30	3340	315	249	2.06865	0.0385801	2.06865	0.0385801	74	11	0.0379828		NewVar30	191	134	68	0.492704	0.622222	0.492704	0.622222	14	11	0.647494
1579.7	6330.31	0.195858	NewVar31	3426	490	385	1.51729	0.129196	1.51729	0.129196	74	14	0.131701		NewVar31	3338	317	251	2.04246	0.0411066	2.04246	0.0411066	74	11	0.0406026		NewVar31	191	134	68	0.492704	0.622222	0.492704	0.622222	14	11	0.647494
1581.63	6322.59	0.196097	NewVar32	3425	491	386	1.50588	0.1321	1.50588	0.1321	74	14	0.134691		NewVar32	3338	317	251	2.04246	0.0411066	2.04246	0.0411066	74	11	0.0406026		NewVar32	191	134	68	0.492704	0.622222	0.492704	0.622222	14	11	0.647494
1583.56	6314.89	0.196336	NewVar33	3426	490	385	1.51729	0.129196	1.51729	0.129196	74	14	0.131701		NewVar33	3338	317	251	2.04246	0.0411066	2.04246	0.0411066	74	11	0.0406026		NewVar33	191	134	68	0.492704	0.622222	0.492704	0.622222	14	11	0.647494
1585.49	6307.21	0.196575	NewVar34	3424	492	387	1.49447	0.135054	1.49447	0.135054	74	14	0.137732		NewVar34	3339	316	250	2.05555	0.0398263	2.05555	0.0398263	74	11	0.0392747		NewVar34	192	133	67	0.547449	0.584071	0.547449	0.584071	14	11	0.609202
1587.42	6299.55	0.196814	NewVar35	3425	491	386	1.50588	0.1321	1.50588	0.1321	74	14	0.134691		NewVar35	3337	318	252	2.02937	0.0424216	2.02937	0.0424216	74	11	0.0419671		NewVar35	192	133	67	0.547449	0.584071	0.547449	0.584071	14	11	0.609202
1589.34	6291.9	0.197054	NewVar36	3420	496	391	1.44884	0.147384	1.44884	0.147384	74	14	0.150415		NewVar36	3338	317	251	2.04246	0.0411066	2.04246	0.0411066	74	11	0.0406026		NewVar36	193	132	66	0.602194	0.547046	0.602194	0.547046	14	11	0.571924
1591.27	6284.28	0.197293	NewVar37	3414	502	397	1.38039	0.167468	1.38039	0.167468	74	14	0.171041		NewVar37	3337	318	252	2.02937	0.0424216	2.02937	0.0424216	74	11	0.0419671		NewVar37	192	133	67	0.547449	0.584071	0.547449	0.584071	14	11	0.609202
[truncated: 783 more rows]
