# Supplementary material
Source: MDPI journal article supplement (https://www.mdpi.com/2073-4441/13/11/1475)
Supplement: s1 [file s1 › Supplementary files/S1_2_24052017_File.xls]

## Sheet: Spectra_ICH_2017_1_all
WL, cm-1	WL,nm	eV	veb	hc						veb	hc		pcum	hgch	hc						hgch	hc		pcum	lyd	hc						lyd	hc		pcum	hypl	hc						hypl	hc		pcum	all	hc
			Rank Sum	Rank Sum	U	Z	p-level	Z	p-level	Valid N	Valid N	2*1sided		Rank Sum	Rank Sum	U	Z	p-level	Z	p-level	Valid N	Valid N	2*1sided		Rank Sum	Rank Sum	U	Z	p-level	Z	p-level	Valid N	Valid N	2*1sided		Rank Sum	Rank Sum	U	Z	p-level	Z	p-level	Valid N	Valid N	2*1sided		Rank Sum	Rank Sum	U
948.977	10537.7	0.117658	181	254	76	-1.26566	0.205634	-1.26566	0.205634	14	15	0.217176		231	234	111	-0.0622171	0.95039	-0.0622171	0.95039	15	15	0.967417		259	206	86	1.09917	0.271695	1.09917	0.271695	15	15	0.285441		222	243	102	-0.43552	0.663186	-0.43552	0.663186	15	15	0.682674		211	254	91
950.906	10516.3	0.117897	181	254	76	-1.26566	0.205634	-1.26566	0.205634	14	15	0.217176		254	211	91	0.891778	0.372512	0.891778	0.372512	15	15	0.389233		241	224	104	0.352564	0.724416	0.352564	0.724416	15	15	0.743702		198	267	78	-1.43099	0.152433	-1.43099	0.152433	15	15	0.160685		222	243	102
952.835	10495	0.118136	225	210	90	0.654654	0.512691	0.654654	0.512691	14	15	0.532545		276	189	69	1.8043	0.0711858	1.8043	0.0711858	15	15	0.0742045		245	220	100	0.518476	0.604127	0.518476	0.604127	15	15	0.623594		198	267	78	-1.43099	0.152433	-1.43099	0.152433	15	15	0.160685		237	228	108
954.764	10473.8	0.118376	243	192	72	1.44024	0.149801	1.44024	0.149801	14	15	0.158309		262	203	83	1.2236	0.221103	1.2236	0.221103	15	15	0.232812		237	228	108	0.186651	0.851934	0.186651	0.851934	15	15	0.870194		223	242	103	-0.394042	0.693551	-0.394042	0.693551	15	15	0.712965		255	210	90
956.693	10452.7	0.118615	194	241	89	-0.698297	0.484992	-0.698297	0.484992	14	15	0.504539		233	232	112	0.020739	0.983454	0.020739	0.983454	15	15	1		238	227	107	0.228129	0.819546	0.228129	0.819546	15	15	0.838135		242	223	103	0.394042	0.693551	0.394042	0.693551	15	15	0.712965		261	204	84
958.622	10431.6	0.118854	180	255	75	-1.30931	0.190431	-1.30931	0.190431	14	15	0.201205		220	245	100	-0.518476	0.604127	-0.518476	0.604127	15	15	0.623594		218	247	98	-0.601432	0.547553	-0.601432	0.547553	15	15	0.566774		226	239	106	-0.269607	0.787462	-0.269607	0.787462	15	15	0.806334		256	209	89
960.55	10410.7	0.119093	191	244	86	-0.829228	0.406976	-0.829228	0.406976	14	15	0.425262		243	222	102	0.43552	0.663186	0.43552	0.663186	15	15	0.682674		239	226	106	0.269607	0.787462	0.269607	0.787462	15	15	0.806334		220	245	100	-0.518476	0.604127	-0.518476	0.604127	15	15	0.623594		256	209	89
962.479	10389.8	0.119332	203	232	98	-0.305505	0.759982	-0.305505	0.759982	14	15	0.779995		237	228	108	0.186651	0.851934	0.186651	0.851934	15	15	0.870194		195	270	75	-1.55543	0.119845	-1.55543	0.119845	15	15	0.126147		209	256	89	-0.974735	0.329693	-0.974735	0.329693	15	15	0.345311		244	221	101
964.408	10369.1	0.119571	197	238	92	-0.567367	0.570466	-0.567367	0.570466	14	15	0.590745		211	254	91	-0.891778	0.372512	-0.891778	0.372512	15	15	0.389233		209	256	89	-0.974735	0.329693	-0.974735	0.329693	15	15	0.345311		202	263	82	-1.26508	0.205843	-1.26508	0.205843	15	15	0.216857		248	217	97
966.337	10348.4	0.11981	199	236	94	-0.480079	0.631171	-0.480079	0.631171	14	15	0.651619		232	233	112	-0.020739	0.983454	-0.020739	0.983454	15	15	1		209	256	89	-0.974735	0.329693	-0.974735	0.329693	15	15	0.345311		225	240	105	-0.311086	0.755736	-0.311086	0.755736	15	15	0.77484		227	238	107
968.266	10327.7	0.12005	177	258	72	-1.44024	0.149801	-1.44024	0.149801	14	15	0.158309		249	216	96	0.684388	0.493731	0.684388	0.493731	15	15	0.512486		186	279	66	-1.92873	0.0537652	-1.92873	0.0537652	15	15	0.0555296		228	237	108	-0.186651	0.851934	-0.186651	0.851934	15	15	0.870194		256	209	89
970.194	10307.2	0.120289	187	248	82	-1.0038	0.315475	-1.0038	0.315475	14	15	0.331405		252	213	93	0.808822	0.418618	0.808822	0.418618	15	15	0.436289		189	276	69	-1.8043	0.0711858	-1.8043	0.0711858	15	15	0.0742045		224	241	104	-0.352564	0.724416	-0.352564	0.724416	15	15	0.743702		252	213	93
972.123	10286.8	0.120528	192	243	87	-0.785584	0.432112	-0.785584	0.432112	14	15	0.450872		233	232	112	0.020739	0.983454	0.020739	0.983454	15	15	1		164	301	44	-2.84125	0.00449402	-2.84125	0.00449402	15	15	0.00367431	1.56753e-05	217	248	97	-0.64291	0.520283	-0.64291	0.520283	15	15	0.539299		239	226	106
974.052	10266.4	0.120767	189	246	84	-0.916515	0.359397	-0.916515	0.359397	14	15	0.376588		240	225	105	0.311086	0.755736	0.311086	0.755736	15	15	0.77484		165	300	45	-2.79977	0.00511422	-2.79977	0.00511422	15	15	0.00426618		207	258	87	-1.05769	0.290197	-1.05769	0.290197	15	15	0.304591		225	240	105
975.981	10246.1	0.121006	201	234	96	-0.392792	0.694473	-0.392792	0.694473	14	15	0.71483		249	216	96	0.684388	0.493731	0.684388	0.493731	15	15	0.512486		210	255	90	-0.933257	0.350688	-0.933257	0.350688	15	15	0.366875		233	232	112	0.020739	0.983454	0.020739	0.983454	15	15	1		228	237	108
977.91	10225.9	0.121245	195	240	90	-0.654654	0.512691	-0.654654	0.512691	14	15	0.532545		240	225	105	0.311086	0.755736	0.311086	0.755736	15	15	0.77484		197	268	77	-1.47247	0.140895	-1.47247	0.140895	15	15	0.14848		253	212	92	0.8503	0.395159	0.8503	0.395159	15	15	0.412376		233	232	112
979.839	10205.8	0.121484	200	235	95	-0.436436	0.662521	-0.436436	0.662521	14	15	0.682954		268	197	77	1.47247	0.140895	1.47247	0.140895	15	15	0.14848		201	264	81	-1.30656	0.191363	-1.30656	0.191363	15	15	0.201679		226	239	106	-0.269607	0.787462	-0.269607	0.787462	15	15	0.806334		236	229	109
981.767	10185.7	0.121724	212	223	103	0.0872872	0.930443	0.0872872	0.930443	14	15	0.948623		266	199	79	1.38952	0.164677	1.38952	0.164677	15	15	0.173609		203	262	83	-1.2236	0.221103	-1.2236	0.221103	15	15	0.232812		218	247	98	-0.601432	0.547553	-0.601432	0.547553	15	15	0.566774		236	229	109
983.696	10165.7	0.121963	210	225	105	0	1	0	1	14	15	1.01714		242	223	103	0.394042	0.693551	0.394042	0.693551	15	15	0.712965		198	267	78	-1.43099	0.152433	-1.43099	0.152433	15	15	0.160685		227	238	107	-0.228129	0.819546	-0.228129	0.819546	15	15	0.838135		234	231	111
985.625	10145.8	0.122202	188	247	83	-0.960159	0.336976	-0.960159	0.336976	14	15	0.353554		227	238	107	-0.228129	0.819546	-0.228129	0.819546	15	15	0.838135		189	276	69	-1.8043	0.0711858	-1.8043	0.0711858	15	15	0.0742045		216	249	96	-0.684388	0.493731	-0.684388	0.493731	15	15	0.512486		224	241	104
987.554	10126	0.122441	188	247	83	-0.960159	0.336976	-0.960159	0.336976	14	15	0.353554		232	233	112	-0.020739	0.983454	-0.020739	0.983454	15	15	1		194	271	74	-1.59691	0.110288	-1.59691	0.110288	15	15	0.115979		224	241	104	-0.352564	0.724416	-0.352564	0.724416	15	15	0.743702		229	236	109
989.483	10106.3	0.12268	194	241	89	-0.698297	0.484992	-0.698297	0.484992	14	15	0.504539		244	221	101	0.476998	0.633364	0.476998	0.633364	15	15	0.65287		198	267	78	-1.43099	0.152433	-1.43099	0.152433	15	15	0.160685		233	232	112	0.020739	0.983454	0.020739	0.983454	15	15	1		240	225	105
991.411	10086.6	0.122919	189	246	84	-0.916515	0.359397	-0.916515	0.359397	14	15	0.376588		256	209	89	0.974735	0.329693	0.974735	0.329693	15	15	0.345311		201	264	81	-1.30656	0.191363	-1.30656	0.191363	15	15	0.201679		229	236	109	-0.145173	0.884574	-0.145173	0.884574	15	15	0.902462		248	217	97
993.34	10067	0.123158	184	251	79	-1.13473	0.256488	-1.13473	0.256488	14	15	0.270299		251	214	94	0.767344	0.442877	0.767344	0.442877	15	15	0.460959		204	261	84	-1.18212	0.237157	-1.18212	0.237157	15	15	0.249556		234	231	111	0.0622171	0.95039	0.0622171	0.95039	15	15	0.967417		242	223	103
995.269	10047.5	0.123398	191	244	86	-0.829228	0.406976	-0.829228	0.406976	14	15	0.425262		255	210	90	0.933257	0.350688	0.933257	0.350688	15	15	0.366875		205	260	85	-1.14065	0.254018	-1.14065	0.254018	15	15	0.267097		247	218	98	0.601432	0.547553	0.601432	0.547553	15	15	0.566774		249	216	96
997.198	10028.1	0.123637	193	242	88	-0.741941	0.458124	-0.741941	0.458124	14	15	0.477307		259	206	86	1.09917	0.271695	1.09917	0.271695	15	15	0.285441		203	262	83	-1.2236	0.221103	-1.2236	0.221103	15	15	0.232812		239	226	106	0.269607	0.787462	0.269607	0.787462	15	15	0.806334		254	211	91
999.127	10008.7	0.123876	195	240	90	-0.654654	0.512691	-0.654654	0.512691	14	15	0.532545		256	209	89	0.974735	0.329693	0.974735	0.329693	15	15	0.345311		202	263	82	-1.26508	0.205843	-1.26508	0.205843	15	15	0.216857		237	228	108	0.186651	0.851934	0.186651	0.851934	15	15	0.870194		244	221	101
1001.06	9989.46	0.124115	206	229	101	-0.174574	0.861414	-0.174574	0.861414	14	15	0.880478		243	222	102	0.43552	0.663186	0.43552	0.663186	15	15	0.682674		209	256	89	-0.974735	0.329693	-0.974735	0.329693	15	15	0.345311		229	236	109	-0.145173	0.884574	-0.145173	0.884574	15	15	0.902462		239	226	106
1002.98	9970.25	0.124354	202	233	97	-0.349149	0.726978	-0.349149	0.726978	14	15	0.747192		243	222	102	0.43552	0.663186	0.43552	0.663186	15	15	0.682674		210	255	90	-0.933257	0.350688	-0.933257	0.350688	15	15	0.366875		229	236	109	-0.145173	0.884574	-0.145173	0.884574	15	15	0.902462		236	229	109
1004.91	9951.11	0.124593	206	229	101	-0.174574	0.861414	-0.174574	0.861414	14	15	0.880478		249	216	96	0.684388	0.493731	0.684388	0.493731	15	15	0.512486		201	264	81	-1.30656	0.191363	-1.30656	0.191363	15	15	0.201679		224	241	104	-0.352564	0.724416	-0.352564	0.724416	15	15	0.743702		229	236	109
1006.84	9932.05	0.124832	204	231	99	-0.261861	0.793428	-0.261861	0.793428	14	15	0.813179		252	213	93	0.808822	0.418618	0.808822	0.418618	15	15	0.436289		203	262	83	-1.2236	0.221103	-1.2236	0.221103	15	15	0.232812		225	240	105	-0.311086	0.755736	-0.311086	0.755736	15	15	0.77484		233	232	112
1008.77	9913.05	0.125072	203	232	98	-0.305505	0.759982	-0.305505	0.759982	14	15	0.779995		254	211	91	0.891778	0.372512	0.891778	0.372512	15	15	0.389233		199	266	79	-1.38952	0.164677	-1.38952	0.164677	15	15	0.173609		229	236	109	-0.145173	0.884574	-0.145173	0.884574	15	15	0.902462		229	236	109
1010.7	9894.14	0.125311	197	238	92	-0.567367	0.570466	-0.567367	0.570466	14	15	0.590745		248	217	97	0.64291	0.520283	0.64291	0.520283	15	15	0.539299		192	273	72	-1.67986	0.0929852	-1.67986	0.0929852	15	15	0.0975258		235	230	110	0.103695	0.917411	0.103695	0.917411	15	15	0.934887		230	235	110
1012.63	9875.29	0.12555	202	233	97	-0.349149	0.726978	-0.349149	0.726978	14	15	0.747192		249	216	96	0.684388	0.493731	0.684388	0.493731	15	15	0.512486		200	265	80	-1.34804	0.177647	-1.34804	0.177647	15	15	0.187268		244	221	101	0.476998	0.633364	0.476998	0.633364	15	15	0.65287		236	229	109
1014.56	9856.52	0.125789	200	235	95	-0.436436	0.662521	-0.436436	0.662521	14	15	0.682954		247	218	98	0.601432	0.547553	0.601432	0.547553	15	15	0.566774		198	267	78	-1.43099	0.152433	-1.43099	0.152433	15	15	0.160685		237	228	108	0.186651	0.851934	0.186651	0.851934	15	15	0.870194		233	232	112
1016.49	9837.81	0.126028	193	242	88	-0.741941	0.458124	-0.741941	0.458124	14	15	0.477307		244	221	101	0.476998	0.633364	0.476998	0.633364	15	15	0.65287		199	266	79	-1.38952	0.164677	-1.38952	0.164677	15	15	0.173609		230	235	110	-0.103695	0.917411	-0.103695	0.917411	15	15	0.934887		232	233	112
1018.41	9819.18	0.126267	203	232	98	-0.305505	0.759982	-0.305505	0.759982	14	15	0.779995		254	211	91	0.891778	0.372512	0.891778	0.372512	15	15	0.389233		198	267	78	-1.43099	0.152433	-1.43099	0.152433	15	15	0.160685		235	230	110	0.103695	0.917411	0.103695	0.917411	15	15	0.934887		239	226	106
1020.34	9800.62	0.126506	209	226	104	-0.0436436	0.965189	-0.0436436	0.965189	14	15	0.982865		247	218	98	0.601432	0.547553	0.601432	0.547553	15	15	0.566774		200	265	80	-1.34804	0.177647	-1.34804	0.177647	15	15	0.187268		231	234	111	-0.0622171	0.95039	-0.0622171	0.95039	15	15	0.967417		236	229	109
1022.27	9782.13	0.126746	206	229	101	-0.174574	0.861414	-0.174574	0.861414	14	15	0.880478		237	228	108	0.186651	0.851934	0.186651	0.851934	15	15	0.870194		202	263	82	-1.26508	0.205843	-1.26508	0.205843	15	15	0.216857		228	237	108	-0.186651	0.851934	-0.186651	0.851934	15	15	0.870194		230	235	110
1024.2	9763.71	0.126985	203	232	98	-0.305505	0.759982	-0.305505	0.759982	14	15	0.779995		246	219	99	0.559954	0.575511	0.559954	0.575511	15	15	0.594884		200	265	80	-1.34804	0.177647	-1.34804	0.177647	15	15	0.187268		230	235	110	-0.103695	0.917411	-0.103695	0.917411	15	15	0.934887		230	235	110
1026.13	9745.35	0.127224	197	238	92	-0.567367	0.570466	-0.567367	0.570466	14	15	0.590745		252	213	93	0.808822	0.418618	0.808822	0.418618	15	15	0.436289		194	271	74	-1.59691	0.110288	-1.59691	0.110288	15	15	0.115979		233	232	112	0.020739	0.983454	0.020739	0.983454	15	15	1		232	233	112
1028.06	9727.07	0.127463	200	235	95	-0.436436	0.662521	-0.436436	0.662521	14	15	0.682954		251	214	94	0.767344	0.442877	0.767344	0.442877	15	15	0.460959		199	266	79	-1.38952	0.164677	-1.38952	0.164677	15	15	0.173609		238	227	107	0.228129	0.819546	0.228129	0.819546	15	15	0.838135		239	226	106
1029.99	9708.85	0.127702	213	222	102	0.130931	0.89583	0.130931	0.89583	14	15	0.914475		251	214	94	0.767344	0.442877	0.767344	0.442877	15	15	0.460959		204	261	84	-1.18212	0.237157	-1.18212	0.237157	15	15	0.249556		241	224	104	0.352564	0.724416	0.352564	0.724416	15	15	0.743702		241	224	104
1031.92	9690.71	0.127941	207	228	102	-0.130931	0.89583	-0.130931	0.89583	14	15	0.914475		251	214	94	0.767344	0.442877	0.767344	0.442877	15	15	0.460959		206	259	86	-1.09917	0.271695	-1.09917	0.271695	15	15	0.285441		235	230	110	0.103695	0.917411	0.103695	0.917411	15	15	0.934887		237	228	108
1033.85	9672.63	0.12818	207	228	102	-0.130931	0.89583	-0.130931	0.89583	14	15	0.914475		250	215	95	0.725866	0.467921	0.725866	0.467921	15	15	0.486365		206	259	86	-1.09917	0.271695	-1.09917	0.271695	15	15	0.285441		232	233	112	-0.020739	0.983454	-0.020739	0.983454	15	15	1		237	228	108
1035.77	9654.61	0.12842	205	230	100	-0.218218	0.827259	-0.218218	0.827259	14	15	0.846694		251	214	94	0.767344	0.442877	0.767344	0.442877	15	15	0.460959		203	262	83	-1.2236	0.221103	-1.2236	0.221103	15	15	0.232812		233	232	112	0.020739	0.983454	0.020739	0.983454	15	15	1		237	228	108
1037.7	9636.67	0.128659	206	229	101	-0.174574	0.861414	-0.174574	0.861414	14	15	0.880478		254	211	91	0.891778	0.372512	0.891778	0.372512	15	15	0.389233		204	261	84	-1.18212	0.237157	-1.18212	0.237157	15	15	0.249556		235	230	110	0.103695	0.917411	0.103695	0.917411	15	15	0.934887		238	227	107
1039.63	9618.79	0.128898	208	227	103	-0.0872872	0.930443	-0.0872872	0.930443	14	15	0.948623		251	214	94	0.767344	0.442877	0.767344	0.442877	15	15	0.460959		205	260	85	-1.14065	0.254018	-1.14065	0.254018	15	15	0.267097		236	229	109	0.145173	0.884574	0.145173	0.884574	15	15	0.902462		242	223	103
1041.56	9600.98	0.129137	208	227	103	-0.0872872	0.930443	-0.0872872	0.930443	14	15	0.948623		251	214	94	0.767344	0.442877	0.767344	0.442877	15	15	0.460959		207	258	87	-1.05769	0.290197	-1.05769	0.290197	15	15	0.304591		234	231	111	0.0622171	0.95039	0.0622171	0.95039	15	15	0.967417		239	226	106
1043.49	9583.23	0.129376	209	226	104	-0.0436436	0.965189	-0.0436436	0.965189	14	15	0.982865		256	209	89	0.974735	0.329693	0.974735	0.329693	15	15	0.345311		212	253	92	-0.8503	0.395159	-0.8503	0.395159	15	15	0.412376		235	230	110	0.103695	0.917411	0.103695	0.917411	15	15	0.934887		239	226	106
1045.42	9565.55	0.129615	205	230	100	-0.218218	0.827259	-0.218218	0.827259	14	15	0.846694		259	206	86	1.09917	0.271695	1.09917	0.271695	15	15	0.285441		207	258	87	-1.05769	0.290197	-1.05769	0.290197	15	15	0.304591		235	230	110	0.103695	0.917411	0.103695	0.917411	15	15	0.934887		242	223	103
1047.35	9547.93	0.129854	203	232	98	-0.305505	0.759982	-0.305505	0.759982	14	15	0.779995		261	204	84	1.18212	0.237157	1.18212	0.237157	15	15	0.249556		204	261	84	-1.18212	0.237157	-1.18212	0.237157	15	15	0.249556		235	230	110	0.103695	0.917411	0.103695	0.917411	15	15	0.934887		241	224	104
1049.28	9530.38	0.130094	209	226	104	-0.0436436	0.965189	-0.0436436	0.965189	14	15	0.982865		266	199	79	1.38952	0.164677	1.38952	0.164677	15	15	0.173609		206	259	86	-1.09917	0.271695	-1.09917	0.271695	15	15	0.285441		240	225	105	0.311086	0.755736	0.311086	0.755736	15	15	0.77484		244	221	101
1051.2	9512.89	0.130333	206	229	101	-0.174574	0.861414	-0.174574	0.861414	14	15	0.880478		258	207	87	1.05769	0.290197	1.05769	0.290197	15	15	0.304591		206	259	86	-1.09917	0.271695	-1.09917	0.271695	15	15	0.285441		238	227	107	0.228129	0.819546	0.228129	0.819546	15	15	0.838135		241	224	104
1053.13	9495.47	0.130572	212	223	103	0.0872872	0.930443	0.0872872	0.930443	14	15	0.948623		252	213	93	0.808822	0.418618	0.808822	0.418618	15	15	0.436289		206	259	86	-1.09917	0.271695	-1.09917	0.271695	15	15	0.285441		237	228	108	0.186651	0.851934	0.186651	0.851934	15	15	0.870194		237	228	108
1055.06	9478.11	0.130811	213	222	102	0.130931	0.89583	0.130931	0.89583	14	15	0.914475		249	216	96	0.684388	0.493731	0.684388	0.493731	15	15	0.512486		202	263	82	-1.26508	0.205843	-1.26508	0.205843	15	15	0.216857		233	232	112	0.020739	0.983454	0.020739	0.983454	15	15	1		236	229	109
1056.99	9460.82	0.13105	211	224	104	0.0436436	0.965189	0.0436436	0.965189	14	15	0.982865		250	215	95	0.725866	0.467921	0.725866	0.467921	15	15	0.486365		204	261	84	-1.18212	0.237157	-1.18212	0.237157	15	15	0.249556		234	231	111	0.0622171	0.95039	0.0622171	0.95039	15	15	0.967417		239	226	106
1058.92	9443.58	0.131289	206	229	101	-0.174574	0.861414	-0.174574	0.861414	14	15	0.880478		250	215	95	0.725866	0.467921	0.725866	0.467921	15	15	0.486365		205	260	85	-1.14065	0.254018	-1.14065	0.254018	15	15	0.267097		236	229	109	0.145173	0.884574	0.145173	0.884574	15	15	0.902462		238	227	107
1060.85	9426.41	0.131528	208	227	103	-0.0872872	0.930443	-0.0872872	0.930443	14	15	0.948623		252	213	93	0.808822	0.418618	0.808822	0.418618	15	15	0.436289		208	257	88	-1.01621	0.309529	-1.01621	0.309529	15	15	0.324548		236	229	109	0.145173	0.884574	0.145173	0.884574	15	15	0.902462		239	226	106
1062.78	9409.31	0.131768	210	225	105	0	1	0	1	14	15	1.01714		249	216	96	0.684388	0.493731	0.684388	0.493731	15	15	0.512486		208	257	88	-1.01621	0.309529	-1.01621	0.309529	15	15	0.324548		239	226	106	0.269607	0.787462	0.269607	0.787462	15	15	0.806334		240	225	105
1064.71	9392.26	0.132007	207	228	102	-0.130931	0.89583	-0.130931	0.89583	14	15	0.914475		252	213	93	0.808822	0.418618	0.808822	0.418618	15	15	0.436289		207	258	87	-1.05769	0.290197	-1.05769	0.290197	15	15	0.304591		240	225	105	0.311086	0.755736	0.311086	0.755736	15	15	0.77484		242	223	103
1066.64	9375.28	0.132246	204	231	99	-0.261861	0.793428	-0.261861	0.793428	14	15	0.813179		254	211	91	0.891778	0.372512	0.891778	0.372512	15	15	0.389233		206	259	86	-1.09917	0.271695	-1.09917	0.271695	15	15	0.285441		232	233	112	-0.020739	0.983454	-0.020739	0.983454	15	15	1		242	223	103
1068.56	9358.35	0.132485	207	228	102	-0.130931	0.89583	-0.130931	0.89583	14	15	0.914475		251	214	94	0.767344	0.442877	0.767344	0.442877	15	15	0.460959		206	259	86	-1.09917	0.271695	-1.09917	0.271695	15	15	0.285441		234	231	111	0.0622171	0.95039	0.0622171	0.95039	15	15	0.967417		238	227	107
1070.49	9341.49	0.132724	210	225	105	0	1	0	1	14	15	1.01714		249	216	96	0.684388	0.493731	0.684388	0.493731	15	15	0.512486		207	258	87	-1.05769	0.290197	-1.05769	0.290197	15	15	0.304591		234	231	111	0.0622171	0.95039	0.0622171	0.95039	15	15	0.967417		235	230	110
1072.42	9324.69	0.132963	212	223	103	0.0872872	0.930443	0.0872872	0.930443	14	15	0.948623		251	214	94	0.767344	0.442877	0.767344	0.442877	15	15	0.460959		210	255	90	-0.933257	0.350688	-0.933257	0.350688	15	15	0.366875		233	232	112	0.020739	0.983454	0.020739	0.983454	15	15	1		234	231	111
1074.35	9307.95	0.133202	212	223	103	0.0872872	0.930443	0.0872872	0.930443	14	15	0.948623		250	215	95	0.725866	0.467921	0.725866	0.467921	15	15	0.486365		209	256	89	-0.974735	0.329693	-0.974735	0.329693	15	15	0.345311		233	232	112	0.020739	0.983454	0.020739	0.983454	15	15	1		237	228	108
1076.28	9291.27	0.133442	209	226	104	-0.0436436	0.965189	-0.0436436	0.965189	14	15	0.982865		252	213	93	0.808822	0.418618	0.808822	0.418618	15	15	0.436289		208	257	88	-1.01621	0.309529	-1.01621	0.309529	15	15	0.324548		234	231	111	0.0622171	0.95039	0.0622171	0.95039	15	15	0.967417		238	227	107
1078.21	9274.65	0.133681	208	227	103	-0.0872872	0.930443	-0.0872872	0.930443	14	15	0.948623		253	212	92	0.8503	0.395159	0.8503	0.395159	15	15	0.412376		209	256	89	-0.974735	0.329693	-0.974735	0.329693	15	15	0.345311		235	230	110	0.103695	0.917411	0.103695	0.917411	15	15	0.934887		237	228	108
1080.14	9258.09	0.13392	207	228	102	-0.130931	0.89583	-0.130931	0.89583	14	15	0.914475		254	211	91	0.891778	0.372512	0.891778	0.372512	15	15	0.389233		210	255	90	-0.933257	0.350688	-0.933257	0.350688	15	15	0.366875		235	230	110	0.103695	0.917411	0.103695	0.917411	15	15	0.934887		236	229	109
1082.07	9241.58	0.134159	206	229	101	-0.174574	0.861414	-0.174574	0.861414	14	15	0.880478		254	211	91	0.891778	0.372512	0.891778	0.372512	15	15	0.389233		210	255	90	-0.933257	0.350688	-0.933257	0.350688	15	15	0.366875		233	232	112	0.020739	0.983454	0.020739	0.983454	15	15	1		237	228	108
1083.99	9225.14	0.134398	203	232	98	-0.305505	0.759982	-0.305505	0.759982	14	15	0.779995		250	215	95	0.725866	0.467921	0.725866	0.467921	15	15	0.486365		208	257	88	-1.01621	0.309529	-1.01621	0.309529	15	15	0.324548		231	234	111	-0.0622171	0.95039	-0.0622171	0.95039	15	15	0.967417		238	227	107
1085.92	9208.75	0.134637	207	228	102	-0.130931	0.89583	-0.130931	0.89583	14	15	0.914475		248	217	97	0.64291	0.520283	0.64291	0.520283	15	15	0.539299		209	256	89	-0.974735	0.329693	-0.974735	0.329693	15	15	0.345311		227	238	107	-0.228129	0.819546	-0.228129	0.819546	15	15	0.838135		239	226	106
1087.85	9192.43	0.134876	207	228	102	-0.130931	0.89583	-0.130931	0.89583	14	15	0.914475		250	215	95	0.725866	0.467921	0.725866	0.467921	15	15	0.486365		209	256	89	-0.974735	0.329693	-0.974735	0.329693	15	15	0.345311		232	233	112	-0.020739	0.983454	-0.020739	0.983454	15	15	1		240	225	105
1089.78	9176.16	0.135116	206	229	101	-0.174574	0.861414	-0.174574	0.861414	14	15	0.880478		248	217	97	0.64291	0.520283	0.64291	0.520283	15	15	0.539299		212	253	92	-0.8503	0.395159	-0.8503	0.395159	15	15	0.412376		235	230	110	0.103695	0.917411	0.103695	0.917411	15	15	0.934887		239	226	106
1091.71	9159.94	0.135355	207	228	102	-0.130931	0.89583	-0.130931	0.89583	14	15	0.914475		254	211	91	0.891778	0.372512	0.891778	0.372512	15	15	0.389233		212	253	92	-0.8503	0.395159	-0.8503	0.395159	15	15	0.412376		236	229	109	0.145173	0.884574	0.145173	0.884574	15	15	0.902462		238	227	107
1093.64	9143.79	0.135594	208	227	103	-0.0872872	0.930443	-0.0872872	0.930443	14	15	0.948623		254	211	91	0.891778	0.372512	0.891778	0.372512	15	15	0.389233		213	252	93	-0.808822	0.418618	-0.808822	0.418618	15	15	0.436289		235	230	110	0.103695	0.917411	0.103695	0.917411	15	15	0.934887		238	227	107
1095.57	9127.69	0.135833	208	227	103	-0.0872872	0.930443	-0.0872872	0.930443	14	15	0.948623		249	216	96	0.684388	0.493731	0.684388	0.493731	15	15	0.512486		211	254	91	-0.891778	0.372512	-0.891778	0.372512	15	15	0.389233		232	233	112	-0.020739	0.983454	-0.020739	0.983454	15	15	1		239	226	106
1097.5	9111.65	0.136072	208	227	103	-0.0872872	0.930443	-0.0872872	0.930443	14	15	0.948623		251	214	94	0.767344	0.442877	0.767344	0.442877	15	15	0.460959		213	252	93	-0.808822	0.418618	-0.808822	0.418618	15	15	0.436289		235	230	110	0.103695	0.917411	0.103695	0.917411	15	15	0.934887		237	228	108
1099.43	9095.66	0.136311	207	228	102	-0.130931	0.89583	-0.130931	0.89583	14	15	0.914475		251	214	94	0.767344	0.442877	0.767344	0.442877	15	15	0.460959		214	251	94	-0.767344	0.442877	-0.767344	0.442877	15	15	0.460959		233	232	112	0.020739	0.983454	0.020739	0.983454	15	15	1		234	231	111
1101.35	9079.73	0.13655	207	228	102	-0.130931	0.89583	-0.130931	0.89583	14	15	0.914475		250	215	95	0.725866	0.467921	0.725866	0.467921	15	15	0.486365		211	254	91	-0.891778	0.372512	-0.891778	0.372512	15	15	0.389233		233	232	112	0.020739	0.983454	0.020739	0.983454	15	15	1		237	228	108
1103.28	9063.86	0.13679	210	225	105	0	1	0	1	14	15	1.01714		249	216	96	0.684388	0.493731	0.684388	0.493731	15	15	0.512486		211	254	91	-0.891778	0.372512	-0.891778	0.372512	15	15	0.389233		235	230	110	0.103695	0.917411	0.103695	0.917411	15	15	0.934887		237	228	108
1105.21	9048.04	0.137029	207	228	102	-0.130931	0.89583	-0.130931	0.89583	14	15	0.914475		249	216	96	0.684388	0.493731	0.684388	0.493731	15	15	0.512486		211	254	91	-0.891778	0.372512	-0.891778	0.372512	15	15	0.389233		234	231	111	0.0622171	0.95039	0.0622171	0.95039	15	15	0.967417		236	229	109
1107.14	9032.28	0.137268	204	231	99	-0.261861	0.793428	-0.261861	0.793428	14	15	0.813179		247	218	98	0.601432	0.547553	0.601432	0.547553	15	15	0.566774		210	255	90	-0.933257	0.350688	-0.933257	0.350688	15	15	0.366875		231	234	111	-0.0622171	0.95039	-0.0622171	0.95039	15	15	0.967417		236	229	109
1109.07	9016.57	0.137507	205	230	100	-0.218218	0.827259	-0.218218	0.827259	14	15	0.846694		247	218	98	0.601432	0.547553	0.601432	0.547553	15	15	0.566774		209	256	89	-0.974735	0.329693	-0.974735	0.329693	15	15	0.345311		233	232	112	0.020739	0.983454	0.020739	0.983454	15	15	1		236	229	109
1111	9000.92	0.137746	210	225	105	0	1	0	1	14	15	1.01714		250	215	95	0.725866	0.467921	0.725866	0.467921	15	15	0.486365		210	255	90	-0.933257	0.350688	-0.933257	0.350688	15	15	0.366875		234	231	111	0.0622171	0.95039	0.0622171	0.95039	15	15	0.967417		235	230	110
1112.93	8985.32	0.137985	209	226	104	-0.0436436	0.965189	-0.0436436	0.965189	14	15	0.982865		249	216	96	0.684388	0.493731	0.684388	0.493731	15	15	0.512486		211	254	91	-0.891778	0.372512	-0.891778	0.372512	15	15	0.389233		233	232	112	0.020739	0.983454	0.020739	0.983454	15	15	1		233	232	112
1114.86	8969.77	0.138224	207	228	102	-0.130931	0.89583	-0.130931	0.89583	14	15	0.914475		249	216	96	0.684388	0.493731	0.684388	0.493731	15	15	0.512486		212	253	92	-0.8503	0.395159	-0.8503	0.395159	15	15	0.412376		233	232	112	0.020739	0.983454	0.020739	0.983454	15	15	1		235	230	110
1116.78	8954.28	0.138464	207	228	102	-0.130931	0.89583	-0.130931	0.89583	14	15	0.914475		248	217	97	0.64291	0.520283	0.64291	0.520283	15	15	0.539299		212	253	92	-0.8503	0.395159	-0.8503	0.395159	15	15	0.412376		234	231	111	0.0622171	0.95039	0.0622171	0.95039	15	15	0.967417		235	230	110
1118.71	8938.84	0.138703	207	228	102	-0.130931	0.89583	-0.130931	0.89583	14	15	0.914475		249	216	96	0.684388	0.493731	0.684388	0.493731	15	15	0.512486		212	253	92	-0.8503	0.395159	-0.8503	0.395159	15	15	0.412376		234	231	111	0.0622171	0.95039	0.0622171	0.95039	15	15	0.967417		237	228	108
1120.64	8923.46	0.138942	207	228	102	-0.130931	0.89583	-0.130931	0.89583	14	15	0.914475		252	213	93	0.808822	0.418618	0.808822	0.418618	15	15	0.436289		213	252	93	-0.808822	0.418618	-0.808822	0.418618	15	15	0.436289		234	231	111	0.0622171	0.95039	0.0622171	0.95039	15	15	0.967417		240	225	105
1122.57	8908.12	0.139181	205	230	100	-0.218218	0.827259	-0.218218	0.827259	14	15	0.846694		250	215	95	0.725866	0.467921	0.725866	0.467921	15	15	0.486365		213	252	93	-0.808822	0.418618	-0.808822	0.418618	15	15	0.436289		235	230	110	0.103695	0.917411	0.103695	0.917411	15	15	0.934887		241	224	104
1124.5	8892.84	0.13942	206	229	101	-0.174574	0.861414	-0.174574	0.861414	14	15	0.880478		250	215	95	0.725866	0.467921	0.725866	0.467921	15	15	0.486365		211	254	91	-0.891778	0.372512	-0.891778	0.372512	15	15	0.389233		234	231	111	0.0622171	0.95039	0.0622171	0.95039	15	15	0.967417		240	225	105
1126.43	8877.62	0.139659	207	228	102	-0.130931	0.89583	-0.130931	0.89583	14	15	0.914475		250	215	95	0.725866	0.467921	0.725866	0.467921	15	15	0.486365		212	253	92	-0.8503	0.395159	-0.8503	0.395159	15	15	0.412376		234	231	111	0.0622171	0.95039	0.0622171	0.95039	15	15	0.967417		240	225	105
1128.36	8862.44	0.139898	208	227	103	-0.0872872	0.930443	-0.0872872	0.930443	14	15	0.948623		248	217	97	0.64291	0.520283	0.64291	0.520283	15	15	0.539299		212	253	92	-0.8503	0.395159	-0.8503	0.395159	15	15	0.412376		233	232	112	0.020739	0.983454	0.020739	0.983454	15	15	1		242	223	103
1130.29	8847.32	0.140138	208	227	103	-0.0872872	0.930443	-0.0872872	0.930443	14	15	0.948623		247	218	98	0.601432	0.547553	0.601432	0.547553	15	15	0.566774		212	253	92	-0.8503	0.395159	-0.8503	0.395159	15	15	0.412376		233	232	112	0.020739	0.983454	0.020739	0.983454	15	15	1		239	226	106
1132.21	8832.24	0.140377	208	227	103	-0.0872872	0.930443	-0.0872872	0.930443	14	15	0.948623		249	216	96	0.684388	0.493731	0.684388	0.493731	15	15	0.512486		213	252	93	-0.808822	0.418618	-0.808822	0.418618	15	15	0.436289		233	232	112	0.020739	0.983454	0.020739	0.983454	15	15	1		239	226	106
1134.14	8817.22	0.140616	206	229	101	-0.174574	0.861414	-0.174574	0.861414	14	15	0.880478		249	216	96	0.684388	0.493731	0.684388	0.493731	15	15	0.512486		213	252	93	-0.808822	0.418618	-0.808822	0.418618	15	15	0.436289		233	232	112	0.020739	0.983454	0.020739	0.983454	15	15	1		237	228	108
1136.07	8802.25	0.140855	207	228	102	-0.130931	0.89583	-0.130931	0.89583	14	15	0.914475		251	214	94	0.767344	0.442877	0.767344	0.442877	15	15	0.460959		212	253	92	-0.8503	0.395159	-0.8503	0.395159	15	15	0.412376		234	231	111	0.0622171	0.95039	0.0622171	0.95039	15	15	0.967417		236	229	109
1138	8787.34	0.141094	206	229	101	-0.174574	0.861414	-0.174574	0.861414	14	15	0.880478		252	213	93	0.808822	0.418618	0.808822	0.418618	15	15	0.436289		213	252	93	-0.808822	0.418618	-0.808822	0.418618	15	15	0.436289		233	232	112	0.020739	0.983454	0.020739	0.983454	15	15	1		236	229	109
1139.93	8772.47	0.141333	207	228	102	-0.130931	0.89583	-0.130931	0.89583	14	15	0.914475		253	212	92	0.8503	0.395159	0.8503	0.395159	15	15	0.412376		213	252	93	-0.808822	0.418618	-0.808822	0.418618	15	15	0.436289		233	232	112	0.020739	0.983454	0.020739	0.983454	15	15	1		236	229	109
1141.86	8757.65	0.141572	207	228	102	-0.130931	0.89583	-0.130931	0.89583	14	15	0.914475		253	212	92	0.8503	0.395159	0.8503	0.395159	15	15	0.412376		212	253	92	-0.8503	0.395159	-0.8503	0.395159	15	15	0.412376		234	231	111	0.0622171	0.95039	0.0622171	0.95039	15	15	0.967417		236	229	109
1143.79	8742.88	0.141812	205	230	100	-0.218218	0.827259	-0.218218	0.827259	14	15	0.846694		250	215	95	0.725866	0.467921	0.725866	0.467921	15	15	0.486365		212	253	92	-0.8503	0.395159	-0.8503	0.395159	15	15	0.412376		232	233	112	-0.020739	0.983454	-0.020739	0.983454	15	15	1		236	229	109
1145.72	8728.16	0.142051	207	228	102	-0.130931	0.89583	-0.130931	0.89583	14	15	0.914475		249	216	96	0.684388	0.493731	0.684388	0.493731	15	15	0.512486		212	253	92	-0.8503	0.395159	-0.8503	0.395159	15	15	0.412376		232	233	112	-0.020739	0.983454	-0.020739	0.983454	15	15	1		238	227	107
1147.65	8713.49	0.14229	206	229	101	-0.174574	0.861414	-0.174574	0.861414	14	15	0.880478		250	215	95	0.725866	0.467921	0.725866	0.467921	15	15	0.486365		212	253	92	-0.8503	0.395159	-0.8503	0.395159	15	15	0.412376		232	233	112	-0.020739	0.983454	-0.020739	0.983454	15	15	1		237	228	108
1149.57	8698.87	0.142529	206	229	101	-0.174574	0.861414	-0.174574	0.861414	14	15	0.880478		251	214	94	0.767344	0.442877	0.767344	0.442877	15	15	0.460959		212	253	92	-0.8503	0.395159	-0.8503	0.395159	15	15	0.412376		232	233	112	-0.020739	0.983454	-0.020739	0.983454	15	15	1		237	228	108
1151.5	8684.3	0.142768	207	228	102	-0.130931	0.89583	-0.130931	0.89583	14	15	0.914475		250	215	95	0.725866	0.467921	0.725866	0.467921	15	15	0.486365		216	249	96	-0.684388	0.493731	-0.684388	0.493731	15	15	0.512486		232	233	112	-0.020739	0.983454	-0.020739	0.983454	15	15	1		239	226	106
1153.43	8669.78	0.143007	207	228	102	-0.130931	0.89583	-0.130931	0.89583	14	15	0.914475		251	214	94	0.767344	0.442877	0.767344	0.442877	15	15	0.460959		215	250	95	-0.725866	0.467921	-0.725866	0.467921	15	15	0.486365		232	233	112	-0.020739	0.983454	-0.020739	0.983454	15	15	1		238	227	107
1155.36	8655.31	0.143246	205	230	100	-0.218218	0.827259	-0.218218	0.827259	14	15	0.846694		251	214	94	0.767344	0.442877	0.767344	0.442877	15	15	0.460959		214	251	94	-0.767344	0.442877	-0.767344	0.442877	15	15	0.460959		232	233	112	-0.020739	0.983454	-0.020739	0.983454	15	15	1		238	227	107
1157.29	8640.88	0.143486	202	233	97	-0.349149	0.726978	-0.349149	0.726978	14	15	0.747192		252	213	93	0.808822	0.418618	0.808822	0.418618	15	15	0.436289		214	251	94	-0.767344	0.442877	-0.767344	0.442877	15	15	0.460959		232	233	112	-0.020739	0.983454	-0.020739	0.983454	15	15	1		237	228	108
1159.22	8626.5	0.143725	204	231	99	-0.261861	0.793428	-0.261861	0.793428	14	15	0.813179		251	214	94	0.767344	0.442877	0.767344	0.442877	15	15	0.460959		213	252	93	-0.808822	0.418618	-0.808822	0.418618	15	15	0.436289		231	234	111	-0.0622171	0.95039	-0.0622171	0.95039	15	15	0.967417		235	230	110
1161.15	8612.17	0.143964	204	231	99	-0.261861	0.793428	-0.261861	0.793428	14	15	0.813179		249	216	96	0.684388	0.493731	0.684388	0.493731	15	15	0.512486		214	251	94	-0.767344	0.442877	-0.767344	0.442877	15	15	0.460959		231	234	111	-0.0622171	0.95039	-0.0622171	0.95039	15	15	0.967417		233	232	112
1163.08	8597.89	0.144203	203	232	98	-0.305505	0.759982	-0.305505	0.759982	14	15	0.779995		249	216	96	0.684388	0.493731	0.684388	0.493731	15	15	0.512486		215	250	95	-0.725866	0.467921	-0.725866	0.467921	15	15	0.486365		232	233	112	-0.020739	0.983454	-0.020739	0.983454	15	15	1		234	231	111
1165	8583.66	0.144442	203	232	98	-0.305505	0.759982	-0.305505	0.759982	14	15	0.779995		249	216	96	0.684388	0.493731	0.684388	0.493731	15	15	0.512486		214	251	94	-0.767344	0.442877	-0.767344	0.442877	15	15	0.460959		232	233	112	-0.020739	0.983454	-0.020739	0.983454	15	15	1		233	232	112
1166.93	8569.47	0.144681	204	231	99	-0.261861	0.793428	-0.261861	0.793428	14	15	0.813179		249	216	96	0.684388	0.493731	0.684388	0.493731	15	15	0.512486		214	251	94	-0.767344	0.442877	-0.767344	0.442877	15	15	0.460959		232	233	112	-0.020739	0.983454	-0.020739	0.983454	15	15	1		235	230	110
1168.86	8555.33	0.14492	205	230	100	-0.218218	0.827259	-0.218218	0.827259	14	15	0.846694		249	216	96	0.684388	0.493731	0.684388	0.493731	15	15	0.512486		214	251	94	-0.767344	0.442877	-0.767344	0.442877	15	15	0.460959		232	233	112	-0.020739	0.983454	-0.020739	0.983454	15	15	1		237	228	108
1170.79	8541.23	0.14516	203	232	98	-0.305505	0.759982	-0.305505	0.759982	14	15	0.779995		249	216	96	0.684388	0.493731	0.684388	0.493731	15	15	0.512486		214	251	94	-0.767344	0.442877	-0.767344	0.442877	15	15	0.460959		232	233	112	-0.020739	0.983454	-0.020739	0.983454	15	15	1		236	229	109
1172.72	8527.18	0.145399	203	232	98	-0.305505	0.759982	-0.305505	0.759982	14	15	0.779995		249	216	96	0.684388	0.493731	0.684388	0.493731	15	15	0.512486		216	249	96	-0.684388	0.493731	-0.684388	0.493731	15	15	0.512486		232	233	112	-0.020739	0.983454	-0.020739	0.983454	15	15	1		236	229	109
1174.65	8513.18	0.145638	204	231	99	-0.261861	0.793428	-0.261861	0.793428	14	15	0.813179		248	217	97	0.64291	0.520283	0.64291	0.520283	15	15	0.539299		219	246	99	-0.559954	0.575511	-0.559954	0.575511	15	15	0.594884		231	234	111	-0.0622171	0.95039	-0.0622171	0.95039	15	15	0.967417		236	229	109
1176.58	8499.23	0.145877	203	232	98	-0.305505	0.759982	-0.305505	0.759982	14	15	0.779995		249	216	96	0.684388	0.493731	0.684388	0.493731	15	15	0.512486		219	246	99	-0.559954	0.575511	-0.559954	0.575511	15	15	0.594884		231	234	111	-0.0622171	0.95039	-0.0622171	0.95039	15	15	0.967417		234	231	111
1178.51	8485.32	0.146116	203	232	98	-0.305505	0.759982	-0.305505	0.759982	14	15	0.779995		251	214	94	0.767344	0.442877	0.767344	0.442877	15	15	0.460959		218	247	98	-0.601432	0.547553	-0.601432	0.547553	15	15	0.566774		231	234	111	-0.0622171	0.95039	-0.0622171	0.95039	15	15	0.967417		233	232	112
1180.44	8471.45	0.146355	204	231	99	-0.261861	0.793428	-0.261861	0.793428	14	15	0.813179		251	214	94	0.767344	0.442877	0.767344	0.442877	15	15	0.460959		217	248	97	-0.64291	0.520283	-0.64291	0.520283	15	15	0.539299		231	234	111	-0.0622171	0.95039	-0.0622171	0.95039	15	15	0.967417		235	230	110
1182.36	8457.63	0.146594	204	231	99	-0.261861	0.793428	-0.261861	0.793428	14	15	0.813179		249	216	96	0.684388	0.493731	0.684388	0.493731	15	15	0.512486		218	247	98	-0.601432	0.547553	-0.601432	0.547553	15	15	0.566774		231	234	111	-0.0622171	0.95039	-0.0622171	0.95039	15	15	0.967417		236	229	109
1184.29	8443.86	0.146834	202	233	97	-0.349149	0.726978	-0.349149	0.726978	14	15	0.747192		247	218	98	0.601432	0.547553	0.601432	0.547553	15	15	0.566774		219	246	99	-0.559954	0.575511	-0.559954	0.575511	15	15	0.594884		232	233	112	-0.020739	0.983454	-0.020739	0.983454	15	15	1		236	229	109
1186.22	8430.13	0.147073	201	234	96	-0.392792	0.694473	-0.392792	0.694473	14	15	0.71483		248	217	97	0.64291	0.520283	0.64291	0.520283	15	15	0.539299		218	247	98	-0.601432	0.547553	-0.601432	0.547553	15	15	0.566774		231	234	111	-0.0622171	0.95039	-0.0622171	0.95039	15	15	0.967417		236	229	109
1188.15	8416.44	0.147312	201	234	96	-0.392792	0.694473	-0.392792	0.694473	14	15	0.71483		249	216	96	0.684388	0.493731	0.684388	0.493731	15	15	0.512486		220	245	100	-0.518476	0.604127	-0.518476	0.604127	15	15	0.623594		230	235	110	-0.103695	0.917411	-0.103695	0.917411	15	15	0.934887		235	230	110
1190.08	8402.8	0.147551	201	234	96	-0.392792	0.694473	-0.392792	0.694473	14	15	0.71483		248	217	97	0.64291	0.520283	0.64291	0.520283	15	15	0.539299		218	247	98	-0.601432	0.547553	-0.601432	0.547553	15	15	0.566774		230	235	110	-0.103695	0.917411	-0.103695	0.917411	15	15	0.934887		235	230	110
1192.01	8389.2	0.14779	201	234	96	-0.392792	0.694473	-0.392792	0.694473	14	15	0.71483		251	214	94	0.767344	0.442877	0.767344	0.442877	15	15	0.460959		219	246	99	-0.559954	0.575511	-0.559954	0.575511	15	15	0.594884		230	235	110	-0.103695	0.917411	-0.103695	0.917411	15	15	0.934887		234	231	111
1193.94	8375.65	0.148029	202	233	97	-0.349149	0.726978	-0.349149	0.726978	14	15	0.747192		250	215	95	0.725866	0.467921	0.725866	0.467921	15	15	0.486365		219	246	99	-0.559954	0.575511	-0.559954	0.575511	15	15	0.594884		231	234	111	-0.0622171	0.95039	-0.0622171	0.95039	15	15	0.967417		233	232	112
1195.87	8362.14	0.148268	201	234	96	-0.392792	0.694473	-0.392792	0.694473	14	15	0.71483		248	217	97	0.64291	0.520283	0.64291	0.520283	15	15	0.539299		219	246	99	-0.559954	0.575511	-0.559954	0.575511	15	15	0.594884		231	234	111	-0.0622171	0.95039	-0.0622171	0.95039	15	15	0.967417		234	231	111
1197.79	8348.68	0.148508	201	234	96	-0.392792	0.694473	-0.392792	0.694473	14	15	0.71483		249	216	96	0.684388	0.493731	0.684388	0.493731	15	15	0.512486		219	246	99	-0.559954	0.575511	-0.559954	0.575511	15	15	0.594884		231	234	111	-0.0622171	0.95039	-0.0622171	0.95039	15	15	0.967417		235	230	110
1199.72	8335.25	0.148747	201	234	96	-0.392792	0.694473	-0.392792	0.694473	14	15	0.71483		250	215	95	0.725866	0.467921	0.725866	0.467921	15	15	0.486365		219	246	99	-0.559954	0.575511	-0.559954	0.575511	15	15	0.594884		230	235	110	-0.103695	0.917411	-0.103695	0.917411	15	15	0.934887		235	230	110
1201.65	8321.87	0.148986	202	233	97	-0.349149	0.726978	-0.349149	0.726978	14	15	0.747192		250	215	95	0.725866	0.467921	0.725866	0.467921	15	15	0.486365		219	246	99	-0.559954	0.575511	-0.559954	0.575511	15	15	0.594884		230	235	110	-0.103695	0.917411	-0.103695	0.917411	15	15	0.934887		235	230	110
1203.58	8308.54	0.149225	202	233	97	-0.349149	0.726978	-0.349149	0.726978	14	15	0.747192		250	215	95	0.725866	0.467921	0.725866	0.467921	15	15	0.486365		220	245	100	-0.518476	0.604127	-0.518476	0.604127	15	15	0.623594		230	235	110	-0.103695	0.917411	-0.103695	0.917411	15	15	0.934887		234	231	111
1205.51	8295.24	0.149464	202	233	97	-0.349149	0.726978	-0.349149	0.726978	14	15	0.747192		247	218	98	0.601432	0.547553	0.601432	0.547553	15	15	0.566774		219	246	99	-0.559954	0.575511	-0.559954	0.575511	15	15	0.594884		230	235	110	-0.103695	0.917411	-0.103695	0.917411	15	15	0.934887		233	232	112
1207.44	8281.99	0.149703	202	233	97	-0.349149	0.726978	-0.349149	0.726978	14	15	0.747192		247	218	98	0.601432	0.547553	0.601432	0.547553	15	15	0.566774		220	245	100	-0.518476	0.604127	-0.518476	0.604127	15	15	0.623594		229	236	109	-0.145173	0.884574	-0.145173	0.884574	15	15	0.902462		233	232	112
1209.37	8268.78	0.149942	203	232	98	-0.305505	0.759982	-0.305505	0.759982	14	15	0.779995		247	218	98	0.601432	0.547553	0.601432	0.547553	15	15	0.566774		221	244	101	-0.476998	0.633364	-0.476998	0.633364	15	15	0.65287		229	236	109	-0.145173	0.884574	-0.145173	0.884574	15	15	0.902462		234	231	111
1211.3	8255.62	0.150182	203	232	98	-0.305505	0.759982	-0.305505	0.759982	14	15	0.779995		250	215	95	0.725866	0.467921	0.725866	0.467921	15	15	0.486365		222	243	102	-0.43552	0.663186	-0.43552	0.663186	15	15	0.682674		229	236	109	-0.145173	0.884574	-0.145173	0.884574	15	15	0.902462		234	231	111
1213.23	8242.49	0.150421	203	232	98	-0.305505	0.759982	-0.305505	0.759982	14	15	0.779995		250	215	95	0.725866	0.467921	0.725866	0.467921	15	15	0.486365		222	243	102	-0.43552	0.663186	-0.43552	0.663186	15	15	0.682674		229	236	109	-0.145173	0.884574	-0.145173	0.884574	15	15	0.902462		235	230	110
1215.15	8229.41	0.15066	204	231	99	-0.261861	0.793428	-0.261861	0.793428	14	15	0.813179		249	216	96	0.684388	0.493731	0.684388	0.493731	15	15	0.512486		222	243	102	-0.43552	0.663186	-0.43552	0.663186	15	15	0.682674		229	236	109	-0.145173	0.884574	-0.145173	0.884574	15	15	0.902462		235	230	110
1217.08	8216.37	0.150899	202	233	97	-0.349149	0.726978	-0.349149	0.726978	14	15	0.747192		248	217	97	0.64291	0.520283	0.64291	0.520283	15	15	0.539299		223	242	103	-0.394042	0.693551	-0.394042	0.693551	15	15	0.712965		229	236	109	-0.145173	0.884574	-0.145173	0.884574	15	15	0.902462		235	230	110
1219.01	8203.37	0.151138	202	233	97	-0.349149	0.726978	-0.349149	0.726978	14	15	0.747192		249	216	96	0.684388	0.493731	0.684388	0.493731	15	15	0.512486		223	242	103	-0.394042	0.693551	-0.394042	0.693551	15	15	0.712965		229	236	109	-0.145173	0.884574	-0.145173	0.884574	15	15	0.902462		235	230	110
1220.94	8190.41	0.151377	203	232	98	-0.305505	0.759982	-0.305505	0.759982	14	15	0.779995		249	216	96	0.684388	0.493731	0.684388	0.493731	15	15	0.512486		223	242	103	-0.394042	0.693551	-0.394042	0.693551	15	15	0.712965		229	236	109	-0.145173	0.884574	-0.145173	0.884574	15	15	0.902462		235	230	110
1222.87	8177.49	0.151616	203	232	98	-0.305505	0.759982	-0.305505	0.759982	14	15	0.779995		247	218	98	0.601432	0.547553	0.601432	0.547553	15	15	0.566774		223	242	103	-0.394042	0.693551	-0.394042	0.693551	15	15	0.712965		229	236	109	-0.145173	0.884574	-0.145173	0.884574	15	15	0.902462		233	232	112
1224.8	8164.61	0.151856	202	233	97	-0.349149	0.726978	-0.349149	0.726978	14	15	0.747192		247	218	98	0.601432	0.547553	0.601432	0.547553	15	15	0.566774		223	242	103	-0.394042	0.693551	-0.394042	0.693551	15	15	0.712965		229	236	109	-0.145173	0.884574	-0.145173	0.884574	15	15	0.902462		234	231	111
1226.73	8151.77	0.152095	202	233	97	-0.349149	0.726978	-0.349149	0.726978	14	15	0.747192		249	216	96	0.684388	0.493731	0.684388	0.493731	15	15	0.512486		223	242	103	-0.394042	0.693551	-0.394042	0.693551	15	15	0.712965		229	236	109	-0.145173	0.884574	-0.145173	0.884574	15	15	0.902462		234	231	111
1228.66	8138.98	0.152334	203	232	98	-0.305505	0.759982	-0.305505	0.759982	14	15	0.779995		247	218	98	0.601432	0.547553	0.601432	0.547553	15	15	0.566774		224	241	104	-0.352564	0.724416	-0.352564	0.724416	15	15	0.743702		229	236	109	-0.145173	0.884574	-0.145173	0.884574	15	15	0.902462		235	230	110
1230.58	8126.22	0.152573	203	232	98	-0.305505	0.759982	-0.305505	0.759982	14	15	0.779995		246	219	99	0.559954	0.575511	0.559954	0.575511	15	15	0.594884		223	242	103	-0.394042	0.693551	-0.394042	0.693551	15	15	0.712965		229	236	109	-0.145173	0.884574	-0.145173	0.884574	15	15	0.902462		235	230	110
1232.51	8113.5	0.152812	203	232	98	-0.305505	0.759982	-0.305505	0.759982	14	15	0.779995		247	218	98	0.601432	0.547553	0.601432	0.547553	15	15	0.566774		221	244	101	-0.476998	0.633364	-0.476998	0.633364	15	15	0.65287		228	237	108	-0.186651	0.851934	-0.186651	0.851934	15	15	0.870194		234	231	111
1234.44	8100.82	0.153051	203	232	98	-0.305505	0.759982	-0.305505	0.759982	14	15	0.779995		247	218	98	0.601432	0.547553	0.601432	0.547553	15	15	0.566774		223	242	103	-0.394042	0.693551	-0.394042	0.693551	15	15	0.712965		228	237	108	-0.186651	0.851934	-0.186651	0.851934	15	15	0.870194		233	232	112
1236.37	8088.19	0.15329	203	232	98	-0.305505	0.759982	-0.305505	0.759982	14	15	0.779995		247	218	98	0.601432	0.547553	0.601432	0.547553	15	15	0.566774		223	242	103	-0.394042	0.693551	-0.394042	0.693551	15	15	0.712965		228	237	108	-0.186651	0.851934	-0.186651	0.851934	15	15	0.870194		232	233	112
1238.3	8075.59	0.15353	203	232	98	-0.305505	0.759982	-0.305505	0.759982	14	15	0.779995		247	218	98	0.601432	0.547553	0.601432	0.547553	15	15	0.566774		224	241	104	-0.352564	0.724416	-0.352564	0.724416	15	15	0.743702		228	237	108	-0.186651	0.851934	-0.186651	0.851934	15	15	0.870194		232	233	112
1240.23	8063.03	0.153769	203	232	98	-0.305505	0.759982	-0.305505	0.759982	14	15	0.779995		248	217	97	0.64291	0.520283	0.64291	0.520283	15	15	0.539299		225	240	105	-0.311086	0.755736	-0.311086	0.755736	15	15	0.77484		229	236	109	-0.145173	0.884574	-0.145173	0.884574	15	15	0.902462		234	231	111
1242.16	8050.51	0.154008	202	233	97	-0.349149	0.726978	-0.349149	0.726978	14	15	0.747192		247	218	98	0.601432	0.547553	0.601432	0.547553	15	15	0.566774		224	241	104	-0.352564	0.724416	-0.352564	0.724416	15	15	0.743702		229	236	109	-0.145173	0.884574	-0.145173	0.884574	15	15	0.902462		233	232	112
1244.09	8038.03	0.154247	202	233	97	-0.349149	0.726978	-0.349149	0.726978	14	15	0.747192		246	219	99	0.559954	0.575511	0.559954	0.575511	15	15	0.594884		223	242	103	-0.394042	0.693551	-0.394042	0.693551	15	15	0.712965		226	239	106	-0.269607	0.787462	-0.269607	0.787462	15	15	0.806334		233	232	112
1246.02	8025.58	0.154486	202	233	97	-0.349149	0.726978	-0.349149	0.726978	14	15	0.747192		247	218	98	0.601432	0.547553	0.601432	0.547553	15	15	0.566774		226	239	106	-0.269607	0.787462	-0.269607	0.787462	15	15	0.806334		228	237	108	-0.186651	0.851934	-0.186651	0.851934	15	15	0.870194		234	231	111
1247.94	8013.18	0.154725	203	232	98	-0.305505	0.759982	-0.305505	0.759982	14	15	0.779995		247	218	98	0.601432	0.547553	0.601432	0.547553	15	15	0.566774		226	239	106	-0.269607	0.787462	-0.269607	0.787462	15	15	0.806334		230	235	110	-0.103695	0.917411	-0.103695	0.917411	15	15	0.934887		234	231	111
1249.87	8000.81	0.154964	203	232	98	-0.305505	0.759982	-0.305505	0.759982	14	15	0.779995		249	216	96	0.684388	0.493731	0.684388	0.493731	15	15	0.512486		224	241	104	-0.352564	0.724416	-0.352564	0.724416	15	15	0.743702		229	236	109	-0.145173	0.884574	-0.145173	0.884574	15	15	0.902462		235	230	110
1251.8	7988.49	0.155204	204	231	99	-0.261861	0.793428	-0.261861	0.793428	14	15	0.813179		249	216	96	0.684388	0.493731	0.684388	0.493731	15	15	0.512486		225	240	105	-0.311086	0.755736	-0.311086	0.755736	15	15	0.77484		228	237	108	-0.186651	0.851934	-0.186651	0.851934	15	15	0.870194		233	232	112
1253.73	7976.2	0.155443	202	233	97	-0.349149	0.726978	-0.349149	0.726978	14	15	0.747192		248	217	97	0.64291	0.520283	0.64291	0.520283	15	15	0.539299		226	239	106	-0.269607	0.787462	-0.269607	0.787462	15	15	0.806334		228	237	108	-0.186651	0.851934	-0.186651	0.851934	15	15	0.870194		234	231	111
1255.66	7963.94	0.155682	202	233	97	-0.349149	0.726978	-0.349149	0.726978	14	15	0.747192		247	218	98	0.601432	0.547553	0.601432	0.547553	15	15	0.566774		224	241	104	-0.352564	0.724416	-0.352564	0.724416	15	15	0.743702		229	236	109	-0.145173	0.884574	-0.145173	0.884574	15	15	0.902462		235	230	110
1257.59	7951.73	0.155921	201	234	96	-0.392792	0.694473	-0.392792	0.694473	14	15	0.71483		247	218	98	0.601432	0.547553	0.601432	0.547553	15	15	0.566774		224	241	104	-0.352564	0.724416	-0.352564	0.724416	15	15	0.743702		229	236	109	-0.145173	0.884574	-0.145173	0.884574	15	15	0.902462		234	231	111
1259.52	7939.55	0.15616	200	235	95	-0.436436	0.662521	-0.436436	0.662521	14	15	0.682954		247	218	98	0.601432	0.547553	0.601432	0.547553	15	15	0.566774		224	241	104	-0.352564	0.724416	-0.352564	0.724416	15	15	0.743702		228	237	108	-0.186651	0.851934	-0.186651	0.851934	15	15	0.870194		235	230	110
1261.45	7927.41	0.156399	199	236	94	-0.480079	0.631171	-0.480079	0.631171	14	15	0.651619		246	219	99	0.559954	0.575511	0.559954	0.575511	15	15	0.594884		224	241	104	-0.352564	0.724416	-0.352564	0.724416	15	15	0.743702		228	237	108	-0.186651	0.851934	-0.186651	0.851934	15	15	0.870194		234	231	111
1263.37	7915.31	0.156638	199	236	94	-0.480079	0.631171	-0.480079	0.631171	14	15	0.651619		246	219	99	0.559954	0.575511	0.559954	0.575511	15	15	0.594884		225	240	105	-0.311086	0.755736	-0.311086	0.755736	15	15	0.77484		229	236	109	-0.145173	0.884574	-0.145173	0.884574	15	15	0.902462		234	231	111
1265.3	7903.24	0.156878	201	234	96	-0.392792	0.694473	-0.392792	0.694473	14	15	0.71483		249	216	96	0.684388	0.493731	0.684388	0.493731	15	15	0.512486		225	240	105	-0.311086	0.755736	-0.311086	0.755736	15	15	0.77484		230	235	110	-0.103695	0.917411	-0.103695	0.917411	15	15	0.934887		234	231	111
1267.23	7891.21	0.157117	199	236	94	-0.480079	0.631171	-0.480079	0.631171	14	15	0.651619		248	217	97	0.64291	0.520283	0.64291	0.520283	15	15	0.539299		224	241	104	-0.352564	0.724416	-0.352564	0.724416	15	15	0.743702		229	236	109	-0.145173	0.884574	-0.145173	0.884574	15	15	0.902462		233	232	112
1269.16	7879.22	0.157356	201	234	96	-0.392792	0.694473	-0.392792	0.694473	14	15	0.71483		247	218	98	0.601432	0.547553	0.601432	0.547553	15	15	0.566774		225	240	105	-0.311086	0.755736	-0.311086	0.755736	15	15	0.77484		229	236	109	-0.145173	0.884574	-0.145173	0.884574	15	15	0.902462		233	232	112
1271.09	7867.27	0.157595	201	234	96	-0.392792	0.694473	-0.392792	0.694473	14	15	0.71483		246	219	99	0.559954	0.575511	0.559954	0.575511	15	15	0.594884		225	240	105	-0.311086	0.755736	-0.311086	0.755736	15	15	0.77484		228	237	108	-0.186651	0.851934	-0.186651	0.851934	15	15	0.870194		232	233	112
1273.02	7855.35	0.157834	201	234	96	-0.392792	0.694473	-0.392792	0.694473	14	15	0.71483		247	218	98	0.601432	0.547553	0.601432	0.547553	15	15	0.566774		226	239	106	-0.269607	0.787462	-0.269607	0.787462	15	15	0.806334		229	236	109	-0.145173	0.884574	-0.145173	0.884574	15	15	0.902462		232	233	112
1274.95	7843.46	0.158073	201	234	96	-0.392792	0.694473	-0.392792	0.694473	14	15	0.71483		247	218	98	0.601432	0.547553	0.601432	0.547553	15	15	0.566774		225	240	105	-0.311086	0.755736	-0.311086	0.755736	15	15	0.77484		228	237	108	-0.186651	0.851934	-0.186651	0.851934	15	15	0.870194		232	233	112
1276.88	7831.61	0.158312	201	234	96	-0.392792	0.694473	-0.392792	0.694473	14	15	0.71483		248	217	97	0.64291	0.520283	0.64291	0.520283	15	15	0.539299		225	240	105	-0.311086	0.755736	-0.311086	0.755736	15	15	0.77484		228	237	108	-0.186651	0.851934	-0.186651	0.851934	15	15	0.870194		232	233	112
1278.81	7819.8	0.158552	200	235	95	-0.436436	0.662521	-0.436436	0.662521	14	15	0.682954		248	217	97	0.64291	0.520283	0.64291	0.520283	15	15	0.539299		225	240	105	-0.311086	0.755736	-0.311086	0.755736	15	15	0.77484		228	237	108	-0.186651	0.851934	-0.186651	0.851934	15	15	0.870194		233	232	112
1280.73	7808.02	0.158791	200	235	95	-0.436436	0.662521	-0.436436	0.662521	14	15	0.682954		247	218	98	0.601432	0.547553	0.601432	0.547553	15	15	0.566774		226	239	106	-0.269607	0.787462	-0.269607	0.787462	15	15	0.806334		228	237	108	-0.186651	0.851934	-0.186651	0.851934	15	15	0.870194		233	232	112
1282.66	7796.28	0.15903	201	234	96	-0.392792	0.694473	-0.392792	0.694473	14	15	0.71483		246	219	99	0.559954	0.575511	0.559954	0.575511	15	15	0.594884		226	239	106	-0.269607	0.787462	-0.269607	0.787462	15	15	0.806334		229	236	109	-0.145173	0.884574	-0.145173	0.884574	15	15	0.902462		232	233	112
1284.59	7784.58	0.159269	201	234	96	-0.392792	0.694473	-0.392792	0.694473	14	15	0.71483		246	219	99	0.559954	0.575511	0.559954	0.575511	15	15	0.594884		226	239	106	-0.269607	0.787462	-0.269607	0.787462	15	15	0.806334		226	239	106	-0.269607	0.787462	-0.269607	0.787462	15	15	0.806334		232	233	112
1286.52	7772.91	0.159508	201	234	96	-0.392792	0.694473	-0.392792	0.694473	14	15	0.71483		247	218	98	0.601432	0.547553	0.601432	0.547553	15	15	0.566774		227	238	107	-0.228129	0.819546	-0.228129	0.819546	15	15	0.838135		227	238	107	-0.228129	0.819546	-0.228129	0.819546	15	15	0.838135		233	232	112
1288.45	7761.27	0.159747	200	235	95	-0.436436	0.662521	-0.436436	0.662521	14	15	0.682954		248	217	97	0.64291	0.520283	0.64291	0.520283	15	15	0.539299		227	238	107	-0.228129	0.819546	-0.228129	0.819546	15	15	0.838135		227	238	107	-0.228129	0.819546	-0.228129	0.819546	15	15	0.838135		234	231	111
1290.38	7749.67	0.159986	201	234	96	-0.392792	0.694473	-0.392792	0.694473	14	15	0.71483		247	218	98	0.601432	0.547553	0.601432	0.547553	15	15	0.566774		225	240	105	-0.311086	0.755736	-0.311086	0.755736	15	15	0.77484		228	237	108	-0.186651	0.851934	-0.186651	0.851934	15	15	0.870194		232	233	112
1292.31	7738.1	0.160226	199	236	94	-0.480079	0.631171	-0.480079	0.631171	14	15	0.651619		248	217	97	0.64291	0.520283	0.64291	0.520283	15	15	0.539299		225	240	105	-0.311086	0.755736	-0.311086	0.755736	15	15	0.77484		227	238	107	-0.228129	0.819546	-0.228129	0.819546	15	15	0.838135		232	233	112
1294.24	7726.57	0.160465	200	235	95	-0.436436	0.662521	-0.436436	0.662521	14	15	0.682954		247	218	98	0.601432	0.547553	0.601432	0.547553	15	15	0.566774		226	239	106	-0.269607	0.787462	-0.269607	0.787462	15	15	0.806334		226	239	106	-0.269607	0.787462	-0.269607	0.787462	15	15	0.806334		232	233	112
1296.16	7715.07	0.160704	200	235	95	-0.436436	0.662521	-0.436436	0.662521	14	15	0.682954		248	217	97	0.64291	0.520283	0.64291	0.520283	15	15	0.539299		226	239	106	-0.269607	0.787462	-0.269607	0.787462	15	15	0.806334		227	238	107	-0.228129	0.819546	-0.228129	0.819546	15	15	0.838135		232	233	112
1298.09	7703.61	0.160943	200	235	95	-0.436436	0.662521	-0.436436	0.662521	14	15	0.682954		247	218	98	0.601432	0.547553	0.601432	0.547553	15	15	0.566774		226	239	106	-0.269607	0.787462	-0.269607	0.787462	15	15	0.806334		226	239	106	-0.269607	0.787462	-0.269607	0.787462	15	15	0.806334		232	233	112
1300.02	7692.18	0.161182	200	235	95	-0.436436	0.662521	-0.436436	0.662521	14	15	0.682954		246	219	99	0.559954	0.575511	0.559954	0.575511	15	15	0.594884		226	239	106	-0.269607	0.787462	-0.269607	0.787462	15	15	0.806334		226	239	106	-0.269607	0.787462	-0.269607	0.787462	15	15	0.806334		232	233	112
1301.95	7680.78	0.161421	200	235	95	-0.436436	0.662521	-0.436436	0.662521	14	15	0.682954		245	220	100	0.518476	0.604127	0.518476	0.604127	15	15	0.623594		226	239	106	-0.269607	0.787462	-0.269607	0.787462	15	15	0.806334		226	239	106	-0.269607	0.787462	-0.269607	0.787462	15	15	0.806334		232	233	112
1303.88	7669.42	0.16166	200	235	95	-0.436436	0.662521	-0.436436	0.662521	14	15	0.682954		244	221	101	0.476998	0.633364	0.476998	0.633364	15	15	0.65287		226	239	106	-0.269607	0.787462	-0.269607	0.787462	15	15	0.806334		226	239	106	-0.269607	0.787462	-0.269607	0.787462	15	15	0.806334		232	233	112
1305.81	7658.09	0.1619	200	235	95	-0.436436	0.662521	-0.436436	0.662521	14	15	0.682954		246	219	99	0.559954	0.575511	0.559954	0.575511	15	15	0.594884		227	238	107	-0.228129	0.819546	-0.228129	0.819546	15	15	0.838135		227	238	107	-0.228129	0.819546	-0.228129	0.819546	15	15	0.838135		232	233	112
1307.74	7646.8	0.162139	200	235	95	-0.436436	0.662521	-0.436436	0.662521	14	15	0.682954		246	219	99	0.559954	0.575511	0.559954	0.575511	15	15	0.594884		227	238	107	-0.228129	0.819546	-0.228129	0.819546	15	15	0.838135		225	240	105	-0.311086	0.755736	-0.311086	0.755736	15	15	0.77484		232	233	112
1309.67	7635.53	0.162378	200	235	95	-0.436436	0.662521	-0.436436	0.662521	14	15	0.682954		246	219	99	0.559954	0.575511	0.559954	0.575511	15	15	0.594884		227	238	107	-0.228129	0.819546	-0.228129	0.819546	15	15	0.838135		226	239	106	-0.269607	0.787462	-0.269607	0.787462	15	15	0.806334		232	233	112
1311.59	7624.31	0.162617	200	235	95	-0.436436	0.662521	-0.436436	0.662521	14	15	0.682954		246	219	99	0.559954	0.575511	0.559954	0.575511	15	15	0.594884		227	238	107	-0.228129	0.819546	-0.228129	0.819546	15	15	0.838135		225	240	105	-0.311086	0.755736	-0.311086	0.755736	15	15	0.77484		232	233	112
1313.52	7613.11	0.162856	200	235	95	-0.436436	0.662521	-0.436436	0.662521	14	15	0.682954		248	217	97	0.64291	0.520283	0.64291	0.520283	15	15	0.539299		227	238	107	-0.228129	0.819546	-0.228129	0.819546	15	15	0.838135		226	239	106	-0.269607	0.787462	-0.269607	0.787462	15	15	0.806334		232	233	112
1315.45	7601.95	0.163095	201	234	96	-0.392792	0.694473	-0.392792	0.694473	14	15	0.71483		247	218	98	0.601432	0.547553	0.601432	0.547553	15	15	0.566774		227	238	107	-0.228129	0.819546	-0.228129	0.819546	15	15	0.838135		226	239	106	-0.269607	0.787462	-0.269607	0.787462	15	15	0.806334		232	233	112
1317.38	7590.82	0.163334	201	234	96	-0.392792	0.694473	-0.392792	0.694473	14	15	0.71483		250	215	95	0.725866	0.467921	0.725866	0.467921	15	15	0.486365		228	237	108	-0.186651	0.851934	-0.186651	0.851934	15	15	0.870194		227	238	107	-0.228129	0.819546	-0.228129	0.819546	15	15	0.838135		231	234	111
1319.31	7579.72	0.163574	201	234	96	-0.392792	0.694473	-0.392792	0.694473	14	15	0.71483		248	217	97	0.64291	0.520283	0.64291	0.520283	15	15	0.539299		227	238	107	-0.228129	0.819546	-0.228129	0.819546	15	15	0.838135		226	239	106	-0.269607	0.787462	-0.269607	0.787462	15	15	0.806334		231	234	111
1321.24	7568.65	0.163813	202	233	97	-0.349149	0.726978	-0.349149	0.726978	14	15	0.747192		247	218	98	0.601432	0.547553	0.601432	0.547553	15	15	0.566774		226	239	106	-0.269607	0.787462	-0.269607	0.787462	15	15	0.806334		226	239	106	-0.269607	0.787462	-0.269607	0.787462	15	15	0.806334		231	234	111
1323.17	7557.62	0.164052	202	233	97	-0.349149	0.726978	-0.349149	0.726978	14	15	0.747192		247	218	98	0.601432	0.547553	0.601432	0.547553	15	15	0.566774		227	238	107	-0.228129	0.819546	-0.228129	0.819546	15	15	0.838135		225	240	105	-0.311086	0.755736	-0.311086	0.755736	15	15	0.77484		231	234	111
1325.1	7546.62	0.164291	202	233	97	-0.349149	0.726978	-0.349149	0.726978	14	15	0.747192		247	218	98	0.601432	0.547553	0.601432	0.547553	15	15	0.566774		228	237	108	-0.186651	0.851934	-0.186651	0.851934	15	15	0.870194		225	240	105	-0.311086	0.755736	-0.311086	0.755736	15	15	0.77484		231	234	111
1327.03	7535.65	0.16453	201	234	96	-0.392792	0.694473	-0.392792	0.694473	14	15	0.71483		248	217	97	0.64291	0.520283	0.64291	0.520283	15	15	0.539299		229	236	109	-0.145173	0.884574	-0.145173	0.884574	15	15	0.902462		225	240	105	-0.311086	0.755736	-0.311086	0.755736	15	15	0.77484		231	234	111
1328.95	7524.71	0.164769	201	234	96	-0.392792	0.694473	-0.392792	0.694473	14	15	0.71483		249	216	96	0.684388	0.493731	0.684388	0.493731	15	15	0.512486		229	236	109	-0.145173	0.884574	-0.145173	0.884574	15	15	0.902462		226	239	106	-0.269607	0.787462	-0.269607	0.787462	15	15	0.806334		231	234	111
1330.88	7513.81	0.165008	201	234	96	-0.392792	0.694473	-0.392792	0.694473	14	15	0.71483		248	217	97	0.64291	0.520283	0.64291	0.520283	15	15	0.539299		229	236	109	-0.145173	0.884574	-0.145173	0.884574	15	15	0.902462		226	239	106	-0.269607	0.787462	-0.269607	0.787462	15	15	0.806334		231	234	111
1332.81	7502.93	0.165248	201	234	96	-0.392792	0.694473	-0.392792	0.694473	14	15	0.71483		248	217	97	0.64291	0.520283	0.64291	0.520283	15	15	0.539299		228	237	108	-0.186651	0.851934	-0.186651	0.851934	15	15	0.870194		225	240	105	-0.311086	0.755736	-0.311086	0.755736	15	15	0.77484		231	234	111
1334.74	7492.09	0.165487	201	234	96	-0.392792	0.694473	-0.392792	0.694473	14	15	0.71483		248	217	97	0.64291	0.520283	0.64291	0.520283	15	15	0.539299		229	236	109	-0.145173	0.884574	-0.145173	0.884574	15	15	0.902462		225	240	105	-0.311086	0.755736	-0.311086	0.755736	15	15	0.77484		231	234	111
1336.67	7481.28	0.165726	202	233	97	-0.349149	0.726978	-0.349149	0.726978	14	15	0.747192		251	214	94	0.767344	0.442877	0.767344	0.442877	15	15	0.460959		229	236	109	-0.145173	0.884574	-0.145173	0.884574	15	15	0.902462		225	240	105	-0.311086	0.755736	-0.311086	0.755736	15	15	0.77484		230	235	110
1338.6	7470.5	0.165965	202	233	97	-0.349149	0.726978	-0.349149	0.726978	14	15	0.747192		251	214	94	0.767344	0.442877	0.767344	0.442877	15	15	0.460959		229	236	109	-0.145173	0.884574	-0.145173	0.884574	15	15	0.902462		225	240	105	-0.311086	0.755736	-0.311086	0.755736	15	15	0.77484		230	235	110
1340.53	7459.75	0.166204	202	233	97	-0.349149	0.726978	-0.349149	0.726978	14	15	0.747192		250	215	95	0.725866	0.467921	0.725866	0.467921	15	15	0.486365		226	239	106	-0.269607	0.787462	-0.269607	0.787462	15	15	0.806334		224	241	104	-0.352564	0.724416	-0.352564	0.724416	15	15	0.743702		231	234	111
1342.46	7449.03	0.166443	201	234	96	-0.392792	0.694473	-0.392792	0.694473	14	15	0.71483		248	217	97	0.64291	0.520283	0.64291	0.520283	15	15	0.539299		227	238	107	-0.228129	0.819546	-0.228129	0.819546	15	15	0.838135		224	241	104	-0.352564	0.724416	-0.352564	0.724416	15	15	0.743702		232	233	112
1344.38	7438.35	0.166682	201	234	96	-0.392792	0.694473	-0.392792	0.694473	14	15	0.71483		247	218	98	0.601432	0.547553	0.601432	0.547553	15	15	0.566774		229	236	109	-0.145173	0.884574	-0.145173	0.884574	15	15	0.902462		225	240	105	-0.311086	0.755736	-0.311086	0.755736	15	15	0.77484		232	233	112
1346.31	7427.69	0.166922	201	234	96	-0.392792	0.694473	-0.392792	0.694473	14	15	0.71483		248	217	97	0.64291	0.520283	0.64291	0.520283	15	15	0.539299		229	236	109	-0.145173	0.884574	-0.145173	0.884574	15	15	0.902462		226	239	106	-0.269607	0.787462	-0.269607	0.787462	15	15	0.806334		232	233	112
1348.24	7417.06	0.167161	201	234	96	-0.392792	0.694473	-0.392792	0.694473	14	15	0.71483		249	216	96	0.684388	0.493731	0.684388	0.493731	15	15	0.512486		229	236	109	-0.145173	0.884574	-0.145173	0.884574	15	15	0.902462		225	240	105	-0.311086	0.755736	-0.311086	0.755736	15	15	0.77484		232	233	112
1350.17	7406.47	0.1674	201	234	96	-0.392792	0.694473	-0.392792	0.694473	14	15	0.71483		249	216	96	0.684388	0.493731	0.684388	0.493731	15	15	0.512486		230	235	110	-0.103695	0.917411	-0.103695	0.917411	15	15	0.934887		225	240	105	-0.311086	0.755736	-0.311086	0.755736	15	15	0.77484		231	234	111
1352.1	7395.9	0.167639	201	234	96	-0.392792	0.694473	-0.392792	0.694473	14	15	0.71483		248	217	97	0.64291	0.520283	0.64291	0.520283	15	15	0.539299		230	235	110	-0.103695	0.917411	-0.103695	0.917411	15	15	0.934887		225	240	105	-0.311086	0.755736	-0.311086	0.755736	15	15	0.77484		230	235	110
1354.03	7385.37	0.167878	201	234	96	-0.392792	0.694473	-0.392792	0.694473	14	15	0.71483		247	218	98	0.601432	0.547553	0.601432	0.547553	15	15	0.566774		230	235	110	-0.103695	0.917411	-0.103695	0.917411	15	15	0.934887		225	240	105	-0.311086	0.755736	-0.311086	0.755736	15	15	0.77484		230	235	110
1355.96	7374.86	0.168117	201	234	96	-0.392792	0.694473	-0.392792	0.694473	14	15	0.71483		248	217	97	0.64291	0.520283	0.64291	0.520283	15	15	0.539299		230	235	110	-0.103695	0.917411	-0.103695	0.917411	15	15	0.934887		225	240	105	-0.311086	0.755736	-0.311086	0.755736	15	15	0.77484		231	234	111
1357.89	7364.39	0.168356	201	234	96	-0.392792	0.694473	-0.392792	0.694473	14	15	0.71483		248	217	97	0.64291	0.520283	0.64291	0.520283	15	15	0.539299		230	235	110	-0.103695	0.917411	-0.103695	0.917411	15	15	0.934887		225	240	105	-0.311086	0.755736	-0.311086	0.755736	15	15	0.77484		230	235	110
1359.82	7353.94	0.168596	201	234	96	-0.392792	0.694473	-0.392792	0.694473	14	15	0.71483		249	216	96	0.684388	0.493731	0.684388	0.493731	15	15	0.512486		231	234	111	-0.0622171	0.95039	-0.0622171	0.95039	15	15	0.967417		223	242	103	-0.394042	0.693551	-0.394042	0.693551	15	15	0.712965		229	236	109
1361.74	7343.52	0.168835	203	232	98	-0.305505	0.759982	-0.305505	0.759982	14	15	0.779995		249	216	96	0.684388	0.493731	0.684388	0.493731	15	15	0.512486		231	234	111	-0.0622171	0.95039	-0.0622171	0.95039	15	15	0.967417		223	242	103	-0.394042	0.693551	-0.394042	0.693551	15	15	0.712965		229	236	109
1363.67	7333.14	0.169074	202	233	97	-0.349149	0.726978	-0.349149	0.726978	14	15	0.747192		251	214	94	0.767344	0.442877	0.767344	0.442877	15	15	0.460959		227	238	107	-0.228129	0.819546	-0.228129	0.819546	15	15	0.838135		224	241	104	-0.352564	0.724416	-0.352564	0.724416	15	15	0.743702		231	234	111
1365.6	7322.78	0.169313	201	234	96	-0.392792	0.694473	-0.392792	0.694473	14	15	0.71483		249	216	96	0.684388	0.493731	0.684388	0.493731	15	15	0.512486		231	234	111	-0.0622171	0.95039	-0.0622171	0.95039	15	15	0.967417		225	240	105	-0.311086	0.755736	-0.311086	0.755736	15	15	0.77484		230	235	110
1367.53	7312.45	0.169552	201	234	96	-0.392792	0.694473	-0.392792	0.694473	14	15	0.71483		249	216	96	0.684388	0.493731	0.684388	0.493731	15	15	0.512486		232	233	112	-0.020739	0.983454	-0.020739	0.983454	15	15	1		225	240	105	-0.311086	0.755736	-0.311086	0.755736	15	15	0.77484		229	236	109
1369.46	7302.15	0.169791	201	234	96	-0.392792	0.694473	-0.392792	0.694473	14	15	0.71483		249	216	96	0.684388	0.493731	0.684388	0.493731	15	15	0.512486		231	234	111	-0.0622171	0.95039	-0.0622171	0.95039	15	15	0.967417		224	241	104	-0.352564	0.724416	-0.352564	0.724416	15	15	0.743702		228	237	108
1371.39	7291.88	0.17003	201	234	96	-0.392792	0.694473	-0.392792	0.694473	14	15	0.71483		249	216	96	0.684388	0.493731	0.684388	0.493731	15	15	0.512486		231	234	111	-0.0622171	0.95039	-0.0622171	0.95039	15	15	0.967417		222	243	102	-0.43552	0.663186	-0.43552	0.663186	15	15	0.682674		227	238	107
1373.32	7281.64	0.17027	201	234	96	-0.392792	0.694473	-0.392792	0.694473	14	15	0.71483		250	215	95	0.725866	0.467921	0.725866	0.467921	15	15	0.486365		232	233	112	-0.020739	0.983454	-0.020739	0.983454	15	15	1		223	242	103	-0.394042	0.693551	-0.394042	0.693551	15	15	0.712965		228	237	108
1375.25	7271.43	0.170509	201	234	96	-0.392792	0.694473	-0.392792	0.694473	14	15	0.71483		249	216	96	0.684388	0.493731	0.684388	0.493731	15	15	0.512486		232	233	112	-0.020739	0.983454	-0.020739	0.983454	15	15	1		222	243	102	-0.43552	0.663186	-0.43552	0.663186	15	15	0.682674		230	235	110
1377.17	7261.24	0.170748	201	234	96	-0.392792	0.694473	-0.392792	0.694473	14	15	0.71483		249	216	96	0.684388	0.493731	0.684388	0.493731	15	15	0.512486		232	233	112	-0.020739	0.983454	-0.020739	0.983454	15	15	1		224	241	104	-0.352564	0.724416	-0.352564	0.724416	15	15	0.743702		230	235	110
1379.1	7251.09	0.170987	201	234	96	-0.392792	0.694473	-0.392792	0.694473	14	15	0.71483		248	217	97	0.64291	0.520283	0.64291	0.520283	15	15	0.539299		231	234	111	-0.0622171	0.95039	-0.0622171	0.95039	15	15	0.967417		223	242	103	-0.394042	0.693551	-0.394042	0.693551	15	15	0.712965		229	236	109
1381.03	7240.96	0.171226	201	234	96	-0.392792	0.694473	-0.392792	0.694473	14	15	0.71483		249	216	96	0.684388	0.493731	0.684388	0.493731	15	15	0.512486		233	232	112	0.020739	0.983454	0.020739	0.983454	15	15	1		223	242	103	-0.394042	0.693551	-0.394042	0.693551	15	15	0.712965		229	236	109
1382.96	7230.86	0.171465	201	234	96	-0.392792	0.694473	-0.392792	0.694473	14	15	0.71483		250	215	95	0.725866	0.467921	0.725866	0.467921	15	15	0.486365		232	233	112	-0.020739	0.983454	-0.020739	0.983454	15	15	1		223	242	103	-0.394042	0.693551	-0.394042	0.693551	15	15	0.712965		228	237	108
1384.89	7220.79	0.171704	201	234	96	-0.392792	0.694473	-0.392792	0.694473	14	15	0.71483		250	215	95	0.725866	0.467921	0.725866	0.467921	15	15	0.486365		232	233	112	-0.020739	0.983454	-0.020739	0.983454	15	15	1		221	244	101	-0.476998	0.633364	-0.476998	0.633364	15	15	0.65287		228	237	108
1386.82	7210.75	0.171944	201	234	96	-0.392792	0.694473	-0.392792	0.694473	14	15	0.71483		250	215	95	0.725866	0.467921	0.725866	0.467921	15	15	0.486365		232	233	112	-0.020739	0.983454	-0.020739	0.983454	15	15	1		224	241	104	-0.352564	0.724416	-0.352564	0.724416	15	15	0.743702		227	238	107
1388.75	7200.73	0.172183	201	234	96	-0.392792	0.694473	-0.392792	0.694473	14	15	0.71483		250	215	95	0.725866	0.467921	0.725866	0.467921	15	15	0.486365		233	232	112	0.020739	0.983454	0.020739	0.983454	15	15	1		223	242	103	-0.394042	0.693551	-0.394042	0.693551	15	15	0.712965		227	238	107
1390.68	7190.75	0.172422	201	234	96	-0.392792	0.694473	-0.392792	0.694473	14	15	0.71483		249	216	96	0.684388	0.493731	0.684388	0.493731	15	15	0.512486		233	232	112	0.020739	0.983454	0.020739	0.983454	15	15	1		222	243	102	-0.43552	0.663186	-0.43552	0.663186	15	15	0.682674		228	237	108
1392.61	7180.79	0.172661	201	234	96	-0.392792	0.694473	-0.392792	0.694473	14	15	0.71483		250	215	95	0.725866	0.467921	0.725866	0.467921	15	15	0.486365		232	233	112	-0.020739	0.983454	-0.020739	0.983454	15	15	1		221	244	101	-0.476998	0.633364	-0.476998	0.633364	15	15	0.65287		227	238	107
1394.53	7170.85	0.1729	201	234	96	-0.392792	0.694473	-0.392792	0.694473	14	15	0.71483		250	215	95	0.725866	0.467921	0.725866	0.467921	15	15	0.486365		232	233	112	-0.020739	0.983454	-0.020739	0.983454	15	15	1		221	244	101	-0.476998	0.633364	-0.476998	0.633364	15	15	0.65287		226	239	106
1396.46	7160.95	0.173139	202	233	97	-0.349149	0.726978	-0.349149	0.726978	14	15	0.747192		250	215	95	0.725866	0.467921	0.725866	0.467921	15	15	0.486365		232	233	112	-0.020739	0.983454	-0.020739	0.983454	15	15	1		222	243	102	-0.43552	0.663186	-0.43552	0.663186	15	15	0.682674		227	238	107
1398.39	7151.07	0.173378	201	234	96	-0.392792	0.694473	-0.392792	0.694473	14	15	0.71483		250	215	95	0.725866	0.467921	0.725866	0.467921	15	15	0.486365		232	233	112	-0.020739	0.983454	-0.020739	0.983454	15	15	1		221	244	101	-0.476998	0.633364	-0.476998	0.633364	15	15	0.65287		227	238	107
1400.32	7141.22	0.173618	201	234	96	-0.392792	0.694473	-0.392792	0.694473	14	15	0.71483		250	215	95	0.725866	0.467921	0.725866	0.467921	15	15	0.486365		231	234	111	-0.0622171	0.95039	-0.0622171	0.95039	15	15	0.967417		220	245	100	-0.518476	0.604127	-0.518476	0.604127	15	15	0.623594		227	238	107
1402.25	7131.4	0.173857	202	233	97	-0.349149	0.726978	-0.349149	0.726978	14	15	0.747192		249	216	96	0.684388	0.493731	0.684388	0.493731	15	15	0.512486		232	233	112	-0.020739	0.983454	-0.020739	0.983454	15	15	1		220	245	100	-0.518476	0.604127	-0.518476	0.604127	15	15	0.623594		228	237	108
1404.18	7121.6	0.174096	201	234	96	-0.392792	0.694473	-0.392792	0.694473	14	15	0.71483		249	216	96	0.684388	0.493731	0.684388	0.493731	15	15	0.512486		232	233	112	-0.020739	0.983454	-0.020739	0.983454	15	15	1		221	244	101	-0.476998	0.633364	-0.476998	0.633364	15	15	0.65287		228	237	108
1406.11	7111.83	0.174335	201	234	96	-0.392792	0.694473	-0.392792	0.694473	14	15	0.71483		251	214	94	0.767344	0.442877	0.767344	0.442877	15	15	0.460959		232	233	112	-0.020739	0.983454	-0.020739	0.983454	15	15	1		222	243	102	-0.43552	0.663186	-0.43552	0.663186	15	15	0.682674		227	238	107
1408.04	7102.09	0.174574	202	233	97	-0.349149	0.726978	-0.349149	0.726978	14	15	0.747192		250	215	95	0.725866	0.467921	0.725866	0.467921	15	15	0.486365		232	233	112	-0.020739	0.983454	-0.020739	0.983454	15	15	1		221	244	101	-0.476998	0.633364	-0.476998	0.633364	15	15	0.65287		228	237	108
1409.96	7092.38	0.174813	202	233	97	-0.349149	0.726978	-0.349149	0.726978	14	15	0.747192		250	215	95	0.725866	0.467921	0.725866	0.467921	15	15	0.486365		232	233	112	-0.020739	0.983454	-0.020739	0.983454	15	15	1		222	243	102	-0.43552	0.663186	-0.43552	0.663186	15	15	0.682674		228	237	108
1411.89	7082.69	0.175052	201	234	96	-0.392792	0.694473	-0.392792	0.694473	14	15	0.71483		250	215	95	0.725866	0.467921	0.725866	0.467921	15	15	0.486365		232	233	112	-0.020739	0.983454	-0.020739	0.983454	15	15	1		221	244	101	-0.476998	0.633364	-0.476998	0.633364	15	15	0.65287		227	238	107
1413.82	7073.03	0.175292	201	234	96	-0.392792	0.694473	-0.392792	0.694473	14	15	0.71483		250	215	95	0.725866	0.467921	0.725866	0.467921	15	15	0.486365		232	233	112	-0.020739	0.983454	-0.020739	0.983454	15	15	1		221	244	101	-0.476998	0.633364	-0.476998	0.633364	15	15	0.65287		227	238	107
1415.75	7063.39	0.175531	203	232	98	-0.305505	0.759982	-0.305505	0.759982	14	15	0.779995		249	216	96	0.684388	0.493731	0.684388	0.493731	15	15	0.512486		234	231	111	0.0622171	0.95039	0.0622171	0.95039	15	15	0.967417		220	245	100	-0.518476	0.604127	-0.518476	0.604127	15	15	0.623594		224	241	104
1417.68	7053.78	0.17577	202	233	97	-0.349149	0.726978	-0.349149	0.726978	14	15	0.747192		249	216	96	0.684388	0.493731	0.684388	0.493731	15	15	0.512486		232	233	112	-0.020739	0.983454	-0.020739	0.983454	15	15	1		220	245	100	-0.518476	0.604127	-0.518476	0.604127	15	15	0.623594		224	241	104
1419.61	7044.2	0.176009	201	234	96	-0.392792	0.694473	-0.392792	0.694473	14	15	0.71483		250	215	95	0.725866	0.467921	0.725866	0.467921	15	15	0.486365		230	235	110	-0.103695	0.917411	-0.103695	0.917411	15	15	0.934887		219	246	99	-0.559954	0.575511	-0.559954	0.575511	15	15	0.594884		225	240	105
1421.54	7034.64	0.176248	201	234	96	-0.392792	0.694473	-0.392792	0.694473	14	15	0.71483		251	214	94	0.767344	0.442877	0.767344	0.442877	15	15	0.460959		232	233	112	-0.020739	0.983454	-0.020739	0.983454	15	15	1		220	245	100	-0.518476	0.604127	-0.518476	0.604127	15	15	0.623594		225	240	105
1423.47	7025.11	0.176487	201	234	96	-0.392792	0.694473	-0.392792	0.694473	14	15	0.71483		250	215	95	0.725866	0.467921	0.725866	0.467921	15	15	0.486365		232	233	112	-0.020739	0.983454	-0.020739	0.983454	15	15	1		220	245	100	-0.518476	0.604127	-0.518476	0.604127	15	15	0.623594		225	240	105
1425.4	7015.6	0.176726	201	234	96	-0.392792	0.694473	-0.392792	0.694473	14	15	0.71483		249	216	96	0.684388	0.493731	0.684388	0.493731	15	15	0.512486		232	233	112	-0.020739	0.983454	-0.020739	0.983454	15	15	1		221	244	101	-0.476998	0.633364	-0.476998	0.633364	15	15	0.65287		225	240	105
1427.32	7006.12	0.176966	203	232	98	-0.305505	0.759982	-0.305505	0.759982	14	15	0.779995		248	217	97	0.64291	0.520283	0.64291	0.520283	15	15	0.539299		234	231	111	0.0622171	0.95039	0.0622171	0.95039	15	15	0.967417		221	244	101	-0.476998	0.633364	-0.476998	0.633364	15	15	0.65287		224	241	104
1429.25	6996.66	0.177205	203	232	98	-0.305505	0.759982	-0.305505	0.759982	14	15	0.779995		249	216	96	0.684388	0.493731	0.684388	0.493731	15	15	0.512486		232	233	112	-0.020739	0.983454	-0.020739	0.983454	15	15	1		219	246	99	-0.559954	0.575511	-0.559954	0.575511	15	15	0.594884		223	242	103
1431.18	6987.23	0.177444	202	233	97	-0.349149	0.726978	-0.349149	0.726978	14	15	0.747192		251	214	94	0.767344	0.442877	0.767344	0.442877	15	15	0.460959		232	233	112	-0.020739	0.983454	-0.020739	0.983454	15	15	1		219	246	99	-0.559954	0.575511	-0.559954	0.575511	15	15	0.594884		224	241	104
1433.11	6977.83	0.177683	204	231	99	-0.261861	0.793428	-0.261861	0.793428	14	15	0.813179		250	215	95	0.725866	0.467921	0.725866	0.467921	15	15	0.486365		234	231	111	0.0622171	0.95039	0.0622171	0.95039	15	15	0.967417		219	246	99	-0.559954	0.575511	-0.559954	0.575511	15	15	0.594884		223	242	103
1435.04	6968.45	0.177922	203	232	98	-0.305505	0.759982	-0.305505	0.759982	14	15	0.779995		249	216	96	0.684388	0.493731	0.684388	0.493731	15	15	0.512486		234	231	111	0.0622171	0.95039	0.0622171	0.95039	15	15	0.967417		220	245	100	-0.518476	0.604127	-0.518476	0.604127	15	15	0.623594		224	241	104
1436.97	6959.1	0.178161	201	234	96	-0.392792	0.694473	-0.392792	0.694473	14	15	0.71483		249	216	96	0.684388	0.493731	0.684388	0.493731	15	15	0.512486		232	233	112	-0.020739	0.983454	-0.020739	0.983454	15	15	1		221	244	101	-0.476998	0.633364	-0.476998	0.633364	15	15	0.65287		227	238	107
1438.9	6949.77	0.1784	201	234	96	-0.392792	0.694473	-0.392792	0.694473	14	15	0.71483		250	215	95	0.725866	0.467921	0.725866	0.467921	15	15	0.486365		232	233	112	-0.020739	0.983454	-0.020739	0.983454	15	15	1		220	245	100	-0.518476	0.604127	-0.518476	0.604127	15	15	0.623594		224	241	104
1440.83	6940.47	0.17864	202	233	97	-0.349149	0.726978	-0.349149	0.726978	14	15	0.747192		250	215	95	0.725866	0.467921	0.725866	0.467921	15	15	0.486365		232	233	112	-0.020739	0.983454	-0.020739	0.983454	15	15	1		221	244	101	-0.476998	0.633364	-0.476998	0.633364	15	15	0.65287		225	240	105
1442.75	6931.19	0.178879	202	233	97	-0.349149	0.726978	-0.349149	0.726978	14	15	0.747192		250	215	95	0.725866	0.467921	0.725866	0.467921	15	15	0.486365		233	232	112	0.020739	0.983454	0.020739	0.983454	15	15	1		221	244	101	-0.476998	0.633364	-0.476998	0.633364	15	15	0.65287		225	240	105
1444.68	6921.93	0.179118	203	232	98	-0.305505	0.759982	-0.305505	0.759982	14	15	0.779995		250	215	95	0.725866	0.467921	0.725866	0.467921	15	15	0.486365		234	231	111	0.0622171	0.95039	0.0622171	0.95039	15	15	0.967417		221	244	101	-0.476998	0.633364	-0.476998	0.633364	15	15	0.65287		223	242	103
1446.61	6912.7	0.179357	203	232	98	-0.305505	0.759982	-0.305505	0.759982	14	15	0.779995		250	215	95	0.725866	0.467921	0.725866	0.467921	15	15	0.486365		234	231	111	0.0622171	0.95039	0.0622171	0.95039	15	15	0.967417		222	243	102	-0.43552	0.663186	-0.43552	0.663186	15	15	0.682674		225	240	105
1448.54	6903.5	0.179596	202	233	97	-0.349149	0.726978	-0.349149	0.726978	14	15	0.747192		249	216	96	0.684388	0.493731	0.684388	0.493731	15	15	0.512486		233	232	112	0.020739	0.983454	0.020739	0.983454	15	15	1		222	243	102	-0.43552	0.663186	-0.43552	0.663186	15	15	0.682674		224	241	104
1450.47	6894.32	0.179835	203	232	98	-0.305505	0.759982	-0.305505	0.759982	14	15	0.779995		248	217	97	0.64291	0.520283	0.64291	0.520283	15	15	0.539299		234	231	111	0.0622171	0.95039	0.0622171	0.95039	15	15	0.967417		220	245	100	-0.518476	0.604127	-0.518476	0.604127	15	15	0.623594		223	242	103
1452.4	6885.16	0.180074	203	232	98	-0.305505	0.759982	-0.305505	0.759982	14	15	0.779995		250	215	95	0.725866	0.467921	0.725866	0.467921	15	15	0.486365		234	231	111	0.0622171	0.95039	0.0622171	0.95039	15	15	0.967417		217	248	97	-0.64291	0.520283	-0.64291	0.520283	15	15	0.539299		222	243	102
1454.33	6876.03	0.180314	203	232	98	-0.305505	0.759982	-0.305505	0.759982	14	15	0.779995		250	215	95	0.725866	0.467921	0.725866	0.467921	15	15	0.486365		234	231	111	0.0622171	0.95039	0.0622171	0.95039	15	15	0.967417		216	249	96	-0.684388	0.493731	-0.684388	0.493731	15	15	0.512486		222	243	102
1456.26	6866.92	0.180553	202	233	97	-0.349149	0.726978	-0.349149	0.726978	14	15	0.747192		248	217	97	0.64291	0.520283	0.64291	0.520283	15	15	0.539299		234	231	111	0.0622171	0.95039	0.0622171	0.95039	15	15	0.967417		213	252	93	-0.808822	0.418618	-0.808822	0.418618	15	15	0.436289		221	244	101
1458.18	6857.84	0.180792	202	233	97	-0.349149	0.726978	-0.349149	0.726978	14	15	0.747192		247	218	98	0.601432	0.547553	0.601432	0.547553	15	15	0.566774		229	236	109	-0.145173	0.884574	-0.145173	0.884574	15	15	0.902462		219	246	99	-0.559954	0.575511	-0.559954	0.575511	15	15	0.594884		222	243	102
1460.11	6848.78	0.181031	201	234	96	-0.392792	0.694473	-0.392792	0.694473	14	15	0.71483		249	216	96	0.684388	0.493731	0.684388	0.493731	15	15	0.512486		232	233	112	-0.020739	0.983454	-0.020739	0.983454	15	15	1		220	245	100	-0.518476	0.604127	-0.518476	0.604127	15	15	0.623594		223	242	103
1462.04	6839.75	0.18127	202	233	97	-0.349149	0.726978	-0.349149	0.726978	14	15	0.747192		249	216	96	0.684388	0.493731	0.684388	0.493731	15	15	0.512486		234	231	111	0.0622171	0.95039	0.0622171	0.95039	15	15	0.967417		221	244	101	-0.476998	0.633364	-0.476998	0.633364	15	15	0.65287		223	242	103
1463.97	6830.73	0.181509	201	234	96	-0.392792	0.694473	-0.392792	0.694473	14	15	0.71483		249	216	96	0.684388	0.493731	0.684388	0.493731	15	15	0.512486		234	231	111	0.0622171	0.95039	0.0622171	0.95039	15	15	0.967417		218	247	98	-0.601432	0.547553	-0.601432	0.547553	15	15	0.566774		222	243	102
1465.9	6821.75	0.181748	202	233	97	-0.349149	0.726978	-0.349149	0.726978	14	15	0.747192		250	215	95	0.725866	0.467921	0.725866	0.467921	15	15	0.486365		232	233	112	-0.020739	0.983454	-0.020739	0.983454	15	15	1		219	246	99	-0.559954	0.575511	-0.559954	0.575511	15	15	0.594884		223	242	103
1467.83	6812.78	0.181988	203	232	98	-0.305505	0.759982	-0.305505	0.759982	14	15	0.779995		250	215	95	0.725866	0.467921	0.725866	0.467921	15	15	0.486365		234	231	111	0.0622171	0.95039	0.0622171	0.95039	15	15	0.967417		218	247	98	-0.601432	0.547553	-0.601432	0.547553	15	15	0.566774		222	243	102
1469.76	6803.84	0.182227	204	231	99	-0.261861	0.793428	-0.261861	0.793428	14	15	0.813179		249	216	96	0.684388	0.493731	0.684388	0.493731	15	15	0.512486		234	231	111	0.0622171	0.95039	0.0622171	0.95039	15	15	0.967417		216	249	96	-0.684388	0.493731	-0.684388	0.493731	15	15	0.512486		222	243	102
1471.69	6794.92	0.182466	203	232	98	-0.305505	0.759982	-0.305505	0.759982	14	15	0.779995		248	217	97	0.64291	0.520283	0.64291	0.520283	15	15	0.539299		234	231	111	0.0622171	0.95039	0.0622171	0.95039	15	15	0.967417		214	251	94	-0.767344	0.442877	-0.767344	0.442877	15	15	0.460959		222	243	102
1473.62	6786.03	0.182705	202	233	97	-0.349149	0.726978	-0.349149	0.726978	14	15	0.747192		248	217	97	0.64291	0.520283	0.64291	0.520283	15	15	0.539299		232	233	112	-0.020739	0.983454	-0.020739	0.983454	15	15	1		217	248	97	-0.64291	0.520283	-0.64291	0.520283	15	15	0.539299		221	244	101
1475.54	6777.16	0.182944	201	234	96	-0.392792	0.694473	-0.392792	0.694473	14	15	0.71483		249	216	96	0.684388	0.493731	0.684388	0.493731	15	15	0.512486		232	233	112	-0.020739	0.983454	-0.020739	0.983454	15	15	1		218	247	98	-0.601432	0.547553	-0.601432	0.547553	15	15	0.566774		223	242	103
1477.47	6768.31	0.183183	201	234	96	-0.392792	0.694473	-0.392792	0.694473	14	15	0.71483		250	215	95	0.725866	0.467921	0.725866	0.467921	15	15	0.486365		231	234	111	-0.0622171	0.95039	-0.0622171	0.95039	15	15	0.967417		219	246	99	-0.559954	0.575511	-0.559954	0.575511	15	15	0.594884		224	241	104
1479.4	6759.49	0.183422	202	233	97	-0.349149	0.726978	-0.349149	0.726978	14	15	0.747192		250	215	95	0.725866	0.467921	0.725866	0.467921	15	15	0.486365		233	232	112	0.020739	0.983454	0.020739	0.983454	15	15	1		220	245	100	-0.518476	0.604127	-0.518476	0.604127	15	15	0.623594		223	242	103
1481.33	6750.69	0.183662	201	234	96	-0.392792	0.694473	-0.392792	0.694473	14	15	0.71483		249	216	96	0.684388	0.493731	0.684388	0.493731	15	15	0.512486		232	233	112	-0.020739	0.983454	-0.020739	0.983454	15	15	1		221	244	101	-0.476998	0.633364	-0.476998	0.633364	15	15	0.65287		223	242	103
1483.26	6741.91	0.183901	202	233	97	-0.349149	0.726978	-0.349149	0.726978	14	15	0.747192		249	216	96	0.684388	0.493731	0.684388	0.493731	15	15	0.512486		234	231	111	0.0622171	0.95039	0.0622171	0.95039	15	15	0.967417		219	246	99	-0.559954	0.575511	-0.559954	0.575511	15	15	0.594884		223	242	103
1485.19	6733.15	0.18414	202	233	97	-0.349149	0.726978	-0.349149	0.726978	14	15	0.747192		249	216	96	0.684388	0.493731	0.684388	0.493731	15	15	0.512486		234	231	111	0.0622171	0.95039	0.0622171	0.95039	15	15	0.967417		218	247	98	-0.601432	0.547553	-0.601432	0.547553	15	15	0.566774		223	242	103
1487.12	6724.42	0.184379	202	233	97	-0.349149	0.726978	-0.349149	0.726978	14	15	0.747192		247	218	98	0.601432	0.547553	0.601432	0.547553	15	15	0.566774		234	231	111	0.0622171	0.95039	0.0622171	0.95039	15	15	0.967417		216	249	96	-0.684388	0.493731	-0.684388	0.493731	15	15	0.512486		223	242	103
1489.05	6715.71	0.184618	203	232	98	-0.305505	0.759982	-0.305505	0.759982	14	15	0.779995		248	217	97	0.64291	0.520283	0.64291	0.520283	15	15	0.539299		234	231	111	0.0622171	0.95039	0.0622171	0.95039	15	15	0.967417		215	250	95	-0.725866	0.467921	-0.725866	0.467921	15	15	0.486365		221	244	101
1490.97	6707.02	0.184857	202	233	97	-0.349149	0.726978	-0.349149	0.726978	14	15	0.747192		248	217	97	0.64291	0.520283	0.64291	0.520283	15	15	0.539299		231	234	111	-0.0622171	0.95039	-0.0622171	0.95039	15	15	0.967417		217	248	97	-0.64291	0.520283	-0.64291	0.520283	15	15	0.539299		219	246	99
1492.9	6698.36	0.185096	204	231	99	-0.261861	0.793428	-0.261861	0.793428	14	15	0.813179		249	216	96	0.684388	0.493731	0.684388	0.493731	15	15	0.512486		234	231	111	0.0622171	0.95039	0.0622171	0.95039	15	15	0.967417		216	249	96	-0.684388	0.493731	-0.684388	0.493731	15	15	0.512486		224	241	104
1494.83	6689.71	0.185336	204	231	99	-0.261861	0.793428	-0.261861	0.793428	14	15	0.813179		249	216	96	0.684388	0.493731	0.684388	0.493731	15	15	0.512486		234	231	111	0.0622171	0.95039	0.0622171	0.95039	15	15	0.967417		217	248	97	-0.64291	0.520283	-0.64291	0.520283	15	15	0.539299		222	243	102
1496.76	6681.09	0.185575	201	234	96	-0.392792	0.694473	-0.392792	0.694473	14	15	0.71483		249	216	96	0.684388	0.493731	0.684388	0.493731	15	15	0.512486		234	231	111	0.0622171	0.95039	0.0622171	0.95039	15	15	0.967417		216	249	96	-0.684388	0.493731	-0.684388	0.493731	15	15	0.512486		222	243	102
1498.69	6672.49	0.185814	201	234	96	-0.392792	0.694473	-0.392792	0.694473	14	15	0.71483		249	216	96	0.684388	0.493731	0.684388	0.493731	15	15	0.512486		232	233	112	-0.020739	0.983454	-0.020739	0.983454	15	15	1		216	249	96	-0.684388	0.493731	-0.684388	0.493731	15	15	0.512486		222	243	102
1500.62	6663.92	0.186053	201	234	96	-0.392792	0.694473	-0.392792	0.694473	14	15	0.71483		249	216	96	0.684388	0.493731	0.684388	0.493731	15	15	0.512486		233	232	112	0.020739	0.983454	0.020739	0.983454	15	15	1		216	249	96	-0.684388	0.493731	-0.684388	0.493731	15	15	0.512486		222	243	102
1502.55	6655.36	0.186292	203	232	98	-0.305505	0.759982	-0.305505	0.759982	14	15	0.779995		249	216	96	0.684388	0.493731	0.684388	0.493731	15	15	0.512486		234	231	111	0.0622171	0.95039	0.0622171	0.95039	15	15	0.967417		217	248	97	-0.64291	0.520283	-0.64291	0.520283	15	15	0.539299		223	242	103
1504.48	6646.83	0.186531	204	231	99	-0.261861	0.793428	-0.261861	0.793428	14	15	0.813179		249	216	96	0.684388	0.493731	0.684388	0.493731	15	15	0.512486		235	230	110	0.103695	0.917411	0.103695	0.917411	15	15	0.934887		215	250	95	-0.725866	0.467921	-0.725866	0.467921	15	15	0.486365		224	241	104
1506.41	6638.32	0.18677	206	229	101	-0.174574	0.861414	-0.174574	0.861414	14	15	0.880478		247	218	98	0.601432	0.547553	0.601432	0.547553	15	15	0.566774		233	232	112	0.020739	0.983454	0.020739	0.983454	15	15	1		213	252	93	-0.808822	0.418618	-0.808822	0.418618	15	15	0.436289		220	245	100
1508.33	6629.83	0.18701	203	232	98	-0.305505	0.759982	-0.305505	0.759982	14	15	0.779995		249	216	96	0.684388	0.493731	0.684388	0.493731	15	15	0.512486		231	234	111	-0.0622171	0.95039	-0.0622171	0.95039	15	15	0.967417		215	250	95	-0.725866	0.467921	-0.725866	0.467921	15	15	0.486365		221	244	101
1510.26	6621.36	0.187249	201	234	96	-0.392792	0.694473	-0.392792	0.694473	14	15	0.71483		249	216	96	0.684388	0.493731	0.684388	0.493731	15	15	0.512486		233	232	112	0.020739	0.983454	0.020739	0.983454	15	15	1		215	250	95	-0.725866	0.467921	-0.725866	0.467921	15	15	0.486365		220	245	100
1512.19	6612.92	0.187488	201	234	96	-0.392792	0.694473	-0.392792	0.694473	14	15	0.71483		249	216	96	0.684388	0.493731	0.684388	0.493731	15	15	0.512486		234	231	111	0.0622171	0.95039	0.0622171	0.95039	15	15	0.967417		215	250	95	-0.725866	0.467921	-0.725866	0.467921	15	15	0.486365		223	242	103
1514.12	6604.49	0.187727	202	233	97	-0.349149	0.726978	-0.349149	0.726978	14	15	0.747192		248	217	97	0.64291	0.520283	0.64291	0.520283	15	15	0.539299		235	230	110	0.103695	0.917411	0.103695	0.917411	15	15	0.934887		215	250	95	-0.725866	0.467921	-0.725866	0.467921	15	15	0.486365		223	242	103
1516.05	6596.09	0.187966	204	231	99	-0.261861	0.793428	-0.261861	0.793428	14	15	0.813179		248	217	97	0.64291	0.520283	0.64291	0.520283	15	15	0.539299		235	230	110	0.103695	0.917411	0.103695	0.917411	15	15	0.934887		213	252	93	-0.808822	0.418618	-0.808822	0.418618	15	15	0.436289		222	243	102
1517.98	6587.71	0.188205	203	232	98	-0.305505	0.759982	-0.305505	0.759982	14	15	0.779995		249	216	96	0.684388	0.493731	0.684388	0.493731	15	15	0.512486		234	231	111	0.0622171	0.95039	0.0622171	0.95039	15	15	0.967417		216	249	96	-0.684388	0.493731	-0.684388	0.493731	15	15	0.512486		223	242	103
1519.91	6579.35	0.188444	203	232	98	-0.305505	0.759982	-0.305505	0.759982	14	15	0.779995		249	216	96	0.684388	0.493731	0.684388	0.493731	15	15	0.512486		235	230	110	0.103695	0.917411	0.103695	0.917411	15	15	0.934887		213	252	93	-0.808822	0.418618	-0.808822	0.418618	15	15	0.436289		223	242	103
1521.84	6571.01	0.188684	204	231	99	-0.261861	0.793428	-0.261861	0.793428	14	15	0.813179		250	215	95	0.725866	0.467921	0.725866	0.467921	15	15	0.486365		233	232	112	0.020739	0.983454	0.020739	0.983454	15	15	1		214	251	94	-0.767344	0.442877	-0.767344	0.442877	15	15	0.460959		218	247	98
1523.76	6562.69	0.188923	204	231	99	-0.261861	0.793428	-0.261861	0.793428	14	15	0.813179		248	217	97	0.64291	0.520283	0.64291	0.520283	15	15	0.539299		234	231	111	0.0622171	0.95039	0.0622171	0.95039	15	15	0.967417		213	252	93	-0.808822	0.418618	-0.808822	0.418618	15	15	0.436289		221	244	101
1525.69	6554.4	0.189162	205	230	100	-0.218218	0.827259	-0.218218	0.827259	14	15	0.846694		247	218	98	0.601432	0.547553	0.601432	0.547553	15	15	0.566774		234	231	111	0.0622171	0.95039	0.0622171	0.95039	15	15	0.967417		214	251	94	-0.767344	0.442877	-0.767344	0.442877	15	15	0.460959		221	244	101
1527.62	6546.12	0.189401	202	233	97	-0.349149	0.726978	-0.349149	0.726978	14	15	0.747192		249	216	96	0.684388	0.493731	0.684388	0.493731	15	15	0.512486		234	231	111	0.0622171	0.95039	0.0622171	0.95039	15	15	0.967417		215	250	95	-0.725866	0.467921	-0.725866	0.467921	15	15	0.486365		220	245	100
1529.55	6537.87	0.18964	204	231	99	-0.261861	0.793428	-0.261861	0.793428	14	15	0.813179		249	216	96	0.684388	0.493731	0.684388	0.493731	15	15	0.512486		234	231	111	0.0622171	0.95039	0.0622171	0.95039	15	15	0.967417		215	250	95	-0.725866	0.467921	-0.725866	0.467921	15	15	0.486365		223	242	103
1531.48	6529.63	0.189879	204	231	99	-0.261861	0.793428	-0.261861	0.793428	14	15	0.813179		249	216	96	0.684388	0.493731	0.684388	0.493731	15	15	0.512486		236	229	109	0.145173	0.884574	0.145173	0.884574	15	15	0.902462		216	249	96	-0.684388	0.493731	-0.684388	0.493731	15	15	0.512486		224	241	104
1533.41	6521.42	0.190118	205	230	100	-0.218218	0.827259	-0.218218	0.827259	14	15	0.846694		249	216	96	0.684388	0.493731	0.684388	0.493731	15	15	0.512486		233	232	112	0.020739	0.983454	0.020739	0.983454	15	15	1		216	249	96	-0.684388	0.493731	-0.684388	0.493731	15	15	0.512486		221	244	101
1535.34	6513.23	0.190358	204	231	99	-0.261861	0.793428	-0.261861	0.793428	14	15	0.813179		250	215	95	0.725866	0.467921	0.725866	0.467921	15	15	0.486365		234	231	111	0.0622171	0.95039	0.0622171	0.95039	15	15	0.967417		217	248	97	-0.64291	0.520283	-0.64291	0.520283	15	15	0.539299		224	241	104
1537.27	6505.05	0.190597	206	229	101	-0.174574	0.861414	-0.174574	0.861414	14	15	0.880478		249	216	96	0.684388	0.493731	0.684388	0.493731	15	15	0.512486		236	229	109	0.145173	0.884574	0.145173	0.884574	15	15	0.902462		217	248	97	-0.64291	0.520283	-0.64291	0.520283	15	15	0.539299		225	240	105
1539.2	6496.9	0.190836	205	230	100	-0.218218	0.827259	-0.218218	0.827259	14	15	0.846694		250	215	95	0.725866	0.467921	0.725866	0.467921	15	15	0.486365		234	231	111	0.0622171	0.95039	0.0622171	0.95039	15	15	0.967417		216	249	96	-0.684388	0.493731	-0.684388	0.493731	15	15	0.512486		226	239	106
1541.12	6488.77	0.191075	204	231	99	-0.261861	0.793428	-0.261861	0.793428	14	15	0.813179		250	215	95	0.725866	0.467921	0.725866	0.467921	15	15	0.486365		234	231	111	0.0622171	0.95039	0.0622171	0.95039	15	15	0.967417		215	250	95	-0.725866	0.467921	-0.725866	0.467921	15	15	0.486365		225	240	105
1543.05	6480.66	0.191314	205	230	100	-0.218218	0.827259	-0.218218	0.827259	14	15	0.846694		250	215	95	0.725866	0.467921	0.725866	0.467921	15	15	0.486365		233	232	112	0.020739	0.983454	0.020739	0.983454	15	15	1		215	250	95	-0.725866	0.467921	-0.725866	0.467921	15	15	0.486365		222	243	102
1544.98	6472.57	0.191553	206	229	101	-0.174574	0.861414	-0.174574	0.861414	14	15	0.880478		250	215	95	0.725866	0.467921	0.725866	0.467921	15	15	0.486365		232	233	112	-0.020739	0.983454	-0.020739	0.983454	15	15	1		218	247	98	-0.601432	0.547553	-0.601432	0.547553	15	15	0.566774		222	243	102
1546.91	6464.5	0.191792	204	231	99	-0.261861	0.793428	-0.261861	0.793428	14	15	0.813179		249	216	96	0.684388	0.493731	0.684388	0.493731	15	15	0.512486		234	231	111	0.0622171	0.95039	0.0622171	0.95039	15	15	0.967417		219	246	99	-0.559954	0.575511	-0.559954	0.575511	15	15	0.594884		224	241	104
1548.84	6456.45	0.192032	204	231	99	-0.261861	0.793428	-0.261861	0.793428	14	15	0.813179		249	216	96	0.684388	0.493731	0.684388	0.493731	15	15	0.512486		234	231	111	0.0622171	0.95039	0.0622171	0.95039	15	15	0.967417		218	247	98	-0.601432	0.547553	-0.601432	0.547553	15	15	0.566774		222	243	102
1550.77	6448.42	0.192271	205	230	100	-0.218218	0.827259	-0.218218	0.827259	14	15	0.846694		249	216	96	0.684388	0.493731	0.684388	0.493731	15	15	0.512486		234	231	111	0.0622171	0.95039	0.0622171	0.95039	15	15	0.967417		219	246	99	-0.559954	0.575511	-0.559954	0.575511	15	15	0.594884		226	239	106
1552.7	6440.41	0.19251	205	230	100	-0.218218	0.827259	-0.218218	0.827259	14	15	0.846694		249	216	96	0.684388	0.493731	0.684388	0.493731	15	15	0.512486		235	230	110	0.103695	0.917411	0.103695	0.917411	15	15	0.934887		218	247	98	-0.601432	0.547553	-0.601432	0.547553	15	15	0.566774		223	242	103
1554.63	6432.42	0.192749	205	230	100	-0.218218	0.827259	-0.218218	0.827259	14	15	0.846694		248	217	97	0.64291	0.520283	0.64291	0.520283	15	15	0.539299		233	232	112	0.020739	0.983454	0.020739	0.983454	15	15	1		216	249	96	-0.684388	0.493731	-0.684388	0.493731	15	15	0.512486		225	240	105
1556.55	6424.45	0.192988	205	230	100	-0.218218	0.827259	-0.218218	0.827259	14	15	0.846694		251	214	94	0.767344	0.442877	0.767344	0.442877	15	15	0.460959		235	230	110	0.103695	0.917411	0.103695	0.917411	15	15	0.934887		218	247	98	-0.601432	0.547553	-0.601432	0.547553	15	15	0.566774		227	238	107
1558.48	6416.49	0.193227	206	229	101	-0.174574	0.861414	-0.174574	0.861414	14	15	0.880478		250	215	95	0.725866	0.467921	0.725866	0.467921	15	15	0.486365		230	235	110	-0.103695	0.917411	-0.103695	0.917411	15	15	0.934887		224	241	104	-0.352564	0.724416	-0.352564	0.724416	15	15	0.743702		226	239	106
1560.41	6408.56	0.193466	202	233	97	-0.349149	0.726978	-0.349149	0.726978	14	15	0.747192		253	212	92	0.8503	0.395159	0.8503	0.395159	15	15	0.412376		230	235	110	-0.103695	0.917411	-0.103695	0.917411	15	15	0.934887		225	240	105	-0.311086	0.755736	-0.311086	0.755736	15	15	0.77484		224	241	104
1562.34	6400.65	0.193706	204	231	99	-0.261861	0.793428	-0.261861	0.793428	14	15	0.813179		248	217	97	0.64291	0.520283	0.64291	0.520283	15	15	0.539299		234	231	111	0.0622171	0.95039	0.0622171	0.95039	15	15	0.967417		222	243	102	-0.43552	0.663186	-0.43552	0.663186	15	15	0.682674		227	238	107
1564.27	6392.76	0.193945	204	231	99	-0.261861	0.793428	-0.261861	0.793428	14	15	0.813179		249	216	96	0.684388	0.493731	0.684388	0.493731	15	15	0.512486		235	230	110	0.103695	0.917411	0.103695	0.917411	15	15	0.934887		223	242	103	-0.394042	0.693551	-0.394042	0.693551	15	15	0.712965		226	239	106
1566.2	6384.89	0.194184	205	230	100	-0.218218	0.827259	-0.218218	0.827259	14	15	0.846694		251	214	94	0.767344	0.442877	0.767344	0.442877	15	15	0.460959		236	229	109	0.145173	0.884574	0.145173	0.884574	15	15	0.902462		223	242	103	-0.394042	0.693551	-0.394042	0.693551	15	15	0.712965		227	238	107
1568.13	6377.03	0.194423	206	229	101	-0.174574	0.861414	-0.174574	0.861414	14	15	0.880478		250	215	95	0.725866	0.467921	0.725866	0.467921	15	15	0.486365		235	230	110	0.103695	0.917411	0.103695	0.917411	15	15	0.934887		223	242	103	-0.394042	0.693551	-0.394042	0.693551	15	15	0.712965		228	237	108
1570.06	6369.2	0.194662	204	231	99	-0.261861	0.793428	-0.261861	0.793428	14	15	0.813179		252	213	93	0.808822	0.418618	0.808822	0.418618	15	15	0.436289		236	229	109	0.145173	0.884574	0.145173	0.884574	15	15	0.902462		224	241	104	-0.352564	0.724416	-0.352564	0.724416	15	15	0.743702		230	235	110
1571.99	6361.38	0.194901	206	229	101	-0.174574	0.861414	-0.174574	0.861414	14	15	0.880478		252	213	93	0.808822	0.418618	0.808822	0.418618	15	15	0.436289		234	231	111	0.0622171	0.95039	0.0622171	0.95039	15	15	0.967417		225	240	105	-0.311086	0.755736	-0.311086	0.755736	15	15	0.77484		231	234	111
1573.91	6353.59	0.19514	205	230	100	-0.218218	0.827259	-0.218218	0.827259	14	15	0.846694		253	212	92	0.8503	0.395159	0.8503	0.395159	15	15	0.412376		236	229	109	0.145173	0.884574	0.145173	0.884574	15	15	0.902462		226	239	106	-0.269607	0.787462	-0.269607	0.787462	15	15	0.806334		234	231	111
1575.84	6345.81	0.19538	203	232	98	-0.305505	0.759982	-0.305505	0.759982	14	15	0.779995		254	211	91	0.891778	0.372512	0.891778	0.372512	15	15	0.389233		236	229	109	0.145173	0.884574	0.145173	0.884574	15	15	0.902462		226	239	106	-0.269607	0.787462	-0.269607	0.787462	15	15	0.806334		231	234	111
1577.77	6338.05	0.195619	206	229	101	-0.174574	0.861414	-0.174574	0.861414	14	15	0.880478		253	212	92	0.8503	0.395159	0.8503	0.395159	15	15	0.412376		233	232	112	0.020739	0.983454	0.020739	0.983454	15	15	1		227	238	107	-0.228129	0.819546	-0.228129	0.819546	15	15	0.838135		229	236	109
1579.7	6330.31	0.195858	204	231	99	-0.261861	0.793428	-0.261861	0.793428	14	15	0.813179		252	213	93	0.808822	0.418618	0.808822	0.418618	15	15	0.436289		234	231	111	0.0622171	0.95039	0.0622171	0.95039	15	15	0.967417		228	237	108	-0.186651	0.851934	-0.186651	0.851934	15	15	0.870194		230	235	110
1581.63	6322.59	0.196097	204	231	99	-0.261861	0.793428	-0.261861	0.793428	14	15	0.813179		252	213	93	0.808822	0.418618	0.808822	0.418618	15	15	0.436289		235	230	110	0.103695	0.917411	0.103695	0.917411	15	15	0.934887		230	235	110	-0.103695	0.917411	-0.103695	0.917411	15	15	0.934887		231	234	111
1583.56	6314.89	0.196336	206	229	101	-0.174574	0.861414	-0.174574	0.861414	14	15	0.880478		254	211	91	0.891778	0.372512	0.891778	0.372512	15	15	0.389233		233	232	112	0.020739	0.983454	0.020739	0.983454	15	15	1		233	232	112	0.020739	0.983454	0.020739	0.983454	15	15	1		230	235	110
1585.49	6307.21	0.196575	205	230	100	-0.218218	0.827259	-0.218218	0.827259	14	15	0.846694		254	211	91	0.891778	0.372512	0.891778	0.372512	15	15	0.389233		235	230	110	0.103695	0.917411	0.103695	0.917411	15	15	0.934887		231	234	111	-0.0622171	0.95039	-0.0622171	0.95039	15	15	0.967417		231	234	111
1587.42	6299.55	0.196814	205	230	100	-0.218218	0.827259	-0.218218	0.827259	14	15	0.846694		252	213	93	0.808822	0.418618	0.808822	0.418618	15	15	0.436289		233	232	112	0.020739	0.983454	0.020739	0.983454	15	15	1		234	231	111	0.0622171	0.95039	0.0622171	0.95039	15	15	0.967417		233	232	112
1589.34	6291.9	0.197054	207	228	102	-0.130931	0.89583	-0.130931	0.89583	14	15	0.914475		254	211	91	0.891778	0.372512	0.891778	0.372512	15	15	0.389233		231	234	111	-0.0622171	0.95039	-0.0622171	0.95039	15	15	0.967417		240	225	105	0.311086	0.755736	0.311086	0.755736	15	15	0.77484		236	229	109
1591.27	6284.28	0.197293	210	225	105	0	1	0	1	14	15	1.01714		255	210	90	0.933257	0.350688	0.933257	0.350688	15	15	0.366875		232	233	112	-0.020739	0.983454	-0.020739	0.983454	15	15	1		241	224	104	0.352564	0.724416	0.352564	0.724416	15	15	0.743702		237	228	108
1593.2	6276.67	0.197532	209	226	104	-0.0436436	0.965189	-0.0436436	0.965189	14	15	0.982865		254	211	91	0.891778	0.372512	0.891778	0.372512	15	15	0.389233		235	230	110	0.103695	0.917411	0.103695	0.917411	15	15	0.934887		246	219	99	0.559954	0.575511	0.559954	0.575511	15	15	0.594884		238	227	107
1595.13	6269.08	0.197771	209	226	104	-0.0436436	0.965189	-0.0436436	0.965189	14	15	0.982865		255	210	90	0.933257	0.350688	0.933257	0.350688	15	15	0.366875		236	229	109	0.145173	0.884574	0.145173	0.884574	15	15	0.902462		247	218	98	0.601432	0.547553	0.601432	0.547553	15	15	0.566774		238	227	107
1597.06	6261.51	0.19801	211	224	104	0.0436436	0.965189	0.0436436	0.965189	14	15	0.982865		255	210	90	0.933257	0.350688	0.933257	0.350688	15	15	0.366875		233	232	112	0.020739	0.983454	0.020739	0.983454	15	15	1		248	217	97	0.64291	0.520283	0.64291	0.520283	15	15	0.539299		237	228	108
1598.99	6253.95	0.198249	212	223	103	0.0872872	0.930443	0.0872872	0.930443	14	15	0.948623		254	211	91	0.891778	0.372512	0.891778	0.372512	15	15	0.389233		236	229	109	0.145173	0.884574	0.145173	0.884574	15	15	0.902462		248	217	97	0.64291	0.520283	0.64291	0.520283	15	15	0.539299		239	226	106
1600.92	6246.42	0.198488	214	221	101	0.174574	0.861414	0.174574	0.861414	14	15	0.880478		252	213	93	0.808822	0.418618	0.808822	0.418618	15	15	0.436289		234	231	111	0.0622171	0.95039	0.0622171	0.95039	15	15	0.967417		254	211	91	0.891778	0.372512	0.891778	0.372512	15	15	0.389233		245	220	100
1602.85	6238.9	0.198728	216	219	99	0.261861	0.793428	0.261861	0.793428	14	15	0.813179		251	214	94	0.767344	0.442877	0.767344	0.442877	15	15	0.460959		236	229	109	0.145173	0.884574	0.145173	0.884574	15	15	0.902462		256	209	89	0.974735	0.329693	0.974735	0.329693	15	15	0.345311		244	221	101
1604.77	6231.4	0.198967	215	220	100	0.218218	0.827259	0.218218	0.827259	14	15	0.846694		251	214	94	0.767344	0.442877	0.767344	0.442877	15	15	0.460959		237	228	108	0.186651	0.851934	0.186651	0.851934	15	15	0.870194		259	206	86	1.09917	0.271695	1.09917	0.271695	15	15	0.285441		246	219	99
1606.7	6223.92	0.199206	215	220	100	0.218218	0.827259	0.218218	0.827259	14	15	0.846694		253	212	92	0.8503	0.395159	0.8503	0.395159	15	15	0.412376		236	229	109	0.145173	0.884574	0.145173	0.884574	15	15	0.902462		263	202	82	1.26508	0.205843	1.26508	0.205843	15	15	0.216857		245	220	100
1608.63	6216.46	0.199445	219	216	96	0.392792	0.694473	0.392792	0.694473	14	15	0.71483		258	207	87	1.05769	0.290197	1.05769	0.290197	15	15	0.304591		235	230	110	0.103695	0.917411	0.103695	0.917411	15	15	0.934887		265	200	80	1.34804	0.177647	1.34804	0.177647	15	15	0.187268		245	220	100
1610.56	6209.02	0.199684	223	212	92	0.567367	0.570466	0.567367	0.570466	14	15	0.590745		256	209	89	0.974735	0.329693	0.974735	0.329693	15	15	0.345311		236	229	109	0.145173	0.884574	0.145173	0.884574	15	15	0.902462		266	199	79	1.38952	0.164677	1.38952	0.164677	15	15	0.173609		244	221	101
1612.49	6201.59	0.199923	230	205	85	0.872872	0.382734	0.872872	0.382734	14	15	0.400494		266	199	79	1.38952	0.164677	1.38952	0.164677	15	15	0.173609		244	221	101	0.476998	0.633364	0.476998	0.633364	15	15	0.65287		275	190	70	1.76282	0.0779322	1.76282	0.0779322	15	15	0.0814293		248	217	97
1614.42	6194.18	0.200162	233	202	82	1.0038	0.315475	1.0038	0.315475	14	15	0.331405		266	199	79	1.38952	0.164677	1.38952	0.164677	15	15	0.173609		238	227	107	0.228129	0.819546	0.228129	0.819546	15	15	0.838135		275	190	70	1.76282	0.0779322	1.76282	0.0779322	15	15	0.0814293		251	214	94
1616.35	6186.79	0.200402	241	194	74	1.35295	0.176072	1.35295	0.176072	14	15	0.186083		263	202	82	1.26508	0.205843	1.26508	0.205843	15	15	0.216857		236	229	109	0.145173	0.884574	0.145173	0.884574	15	15	0.902462		275	190	70	1.76282	0.0779322	1.76282	0.0779322	15	15	0.0814293		264	201	81
1618.28	6179.41	0.200641	239	196	76	1.26566	0.205634	1.26566	0.205634	14	15	0.217176		264	201	81	1.30656	0.191363	1.30656	0.191363	15	15	0.201679		233	232	112	0.020739	0.983454	0.020739	0.983454	15	15	1		282	183	63	2.05316	0.0400574	2.05316	0.0400574	15	15	0.0408399	0.0010763	255	210	90
1620.21	6172.06	0.20088	237	198	78	1.17838	0.238647	1.17838	0.238647	14	15	0.251712		248	217	97	0.64291	0.520283	0.64291	0.520283	15	15	0.539299		254	211	91	0.891778	0.372512	0.891778	0.372512	15	15	0.389233		286	179	59	2.21908	0.0264822	2.21908	0.0264822	15	15	0.026354		270	195	75
1622.13	6164.72	0.201119	225	210	90	0.654654	0.512691	0.654654	0.512691	14	15	0.532545		221	244	101	-0.476998	0.633364	-0.476998	0.633364	15	15	0.65287		241	224	104	0.352564	0.724416	0.352564	0.724416	15	15	0.743702		262	203	83	1.2236	0.221103	1.2236	0.221103	15	15	0.232812		271	194	74
1624.06	6157.4	0.201358	193	242	88	-0.741941	0.458124	-0.741941	0.458124	14	15	0.477307		193	272	73	-1.63838	0.101343	-1.63838	0.101343	15	15	0.106446		245	220	100	0.518476	0.604127	0.518476	0.604127	15	15	0.623594		202	263	82	-1.26508	0.205843	-1.26508	0.205843	15	15	0.216857		254	211	91
1625.99	6150.09	0.201597	220	215	95	0.436436	0.662521	0.436436	0.662521	14	15	0.682954		209	256	89	-0.974735	0.329693	-0.974735	0.329693	15	15	0.345311		263	202	82	1.26508	0.205843	1.26508	0.205843	15	15	0.216857		237	228	108	0.186651	0.851934	0.186651	0.851934	15	15	0.870194		275	190	70
1627.92	6142.81	0.201836	194	241	89	-0.698297	0.484992	-0.698297	0.484992	14	15	0.504539		207	258	87	-1.05769	0.290197	-1.05769	0.290197	15	15	0.304591		230	235	110	-0.103695	0.917411	-0.103695	0.917411	15	15	0.934887		218	247	98	-0.601432	0.547553	-0.601432	0.547553	15	15	0.566774		219	246	99
1629.85	6135.54	0.202076	194	241	89	-0.698297	0.484992	-0.698297	0.484992	14	15	0.504539		223	242	103	-0.394042	0.693551	-0.394042	0.693551	15	15	0.712965		249	216	96	0.684388	0.493731	0.684388	0.493731	15	15	0.512486		215	250	95	-0.725866	0.467921	-0.725866	0.467921	15	15	0.486365		249	216	96
1631.78	6128.28	0.202315	182	253	77	-1.22202	0.221701	-1.22202	0.221701	14	15	0.234007		231	234	111	-0.0622171	0.95039	-0.0622171	0.95039	15	15	0.967417		251	214	94	0.767344	0.442877	0.767344	0.442877	15	15	0.460959		197	268	77	-1.47247	0.140895	-1.47247	0.140895	15	15	0.14848		211	254	91
1633.71	6121.05	0.202554	199	236	94	-0.480079	0.631171	-0.480079	0.631171	14	15	0.651619		233	232	112	0.020739	0.983454	0.020739	0.983454	15	15	1		257	208	88	1.01621	0.309529	1.01621	0.309529	15	15	0.324548		209	256	89	-0.974735	0.329693	-0.974735	0.329693	15	15	0.345311		210	255	90
1635.64	6113.83	0.202793	197	238	92	-0.567367	0.570466	-0.567367	0.570466	14	15	0.590745		198	267	78	-1.43099	0.152433	-1.43099	0.152433	15	15	0.160685		253	212	92	0.8503	0.395159	0.8503	0.395159	15	15	0.412376		194	271	74	-1.59691	0.110288	-1.59691	0.110288	15	15	0.115979		216	249	96
1637.56	6106.63	0.203032	184	251	79	-1.13473	0.256488	-1.13473	0.256488	14	15	0.270299		184	281	64	-2.01169	0.0442538	-2.01169	0.0442538	15	15	0.0453339		243	222	102	0.43552	0.663186	0.43552	0.663186	15	15	0.682674		207	258	87	-1.05769	0.290197	-1.05769	0.290197	15	15	0.304591		220	245	100
1639.49	6099.44	0.203271	180	255	75	-1.30931	0.190431	-1.30931	0.190431	14	15	0.201205		201	264	81	-1.30656	0.191363	-1.30656	0.191363	15	15	0.201679		238	227	107	0.228129	0.819546	0.228129	0.819546	15	15	0.838135		203	262	83	-1.2236	0.221103	-1.2236	0.221103	15	15	0.232812		215	250	95
1641.42	6092.28	0.20351	172	263	67	-1.65846	0.0972264	-1.65846	0.0972264	14	15	0.102309		204	261	84	-1.18212	0.237157	-1.18212	0.237157	15	15	0.249556		226	239	106	-0.269607	0.787462	-0.269607	0.787462	15	15	0.806334		208	257	88	-1.01621	0.309529	-1.01621	0.309529	15	15	0.324548		220	245	100
1643.35	6085.13	0.20375	178	257	73	-1.39659	0.162537	-1.39659	0.162537	14	15	0.171789		216	249	96	-0.684388	0.493731	-0.684388	0.493731	15	15	0.512486		254	211	91	0.891778	0.372512	0.891778	0.372512	15	15	0.389233		212	253	92	-0.8503	0.395159	-0.8503	0.395159	15	15	0.412376		204	261	84
1645.28	6077.99	0.203989	197	238	92	-0.567367	0.570466	-0.567367	0.570466	14	15	0.590745		229	236	109	-0.145173	0.884574	-0.145173	0.884574	15	15	0.902462		264	201	81	1.30656	0.191363	1.30656	0.191363	15	15	0.201679		208	257	88	-1.01621	0.309529	-1.01621	0.309529	15	15	0.324548		206	259	86
1647.21	6070.88	0.204228	199	236	94	-0.480079	0.631171	-0.480079	0.631171	14	15	0.651619		237	228	108	0.186651	0.851934	0.186651	0.851934	15	15	0.870194		266	199	79	1.38952	0.164677	1.38952	0.164677	15	15	0.173609		201	264	81	-1.30656	0.191363	-1.30656	0.191363	15	15	0.201679		218	247	98
1649.14	6063.78	0.204467	203	232	98	-0.305505	0.759982	-0.305505	0.759982	14	15	0.779995		226	239	106	-0.269607	0.787462	-0.269607	0.787462	15	15	0.806334		264	201	81	1.30656	0.191363	1.30656	0.191363	15	15	0.201679		223	242	103	-0.394042	0.693551	-0.394042	0.693551	15	15	0.712965		244	221	101
1651.07	6056.69	0.204706	209	226	104	-0.0436436	0.965189	-0.0436436	0.965189	14	15	0.982865		229	236	109	-0.145173	0.884574	-0.145173	0.884574	15	15	0.902462		256	209	89	0.974735	0.329693	0.974735	0.329693	15	15	0.345311		210	255	90	-0.933257	0.350688	-0.933257	0.350688	15	15	0.366875		222	243	102
1653	6049.62	0.204945	212	223	103	0.0872872	0.930443	0.0872872	0.930443	14	15	0.948623		225	240	105	-0.311086	0.755736	-0.311086	0.755736	15	15	0.77484		263	202	82	1.26508	0.205843	1.26508	0.205843	15	15	0.216857		200	265	80	-1.34804	0.177647	-1.34804	0.177647	15	15	0.187268		221	244	101
1654.92	6042.57	0.205184	186	249	81	-1.04745	0.294895	-1.04745	0.294895	14	15	0.310143		221	244	101	-0.476998	0.633364	-0.476998	0.633364	15	15	0.65287		244	221	101	0.476998	0.633364	0.476998	0.633364	15	15	0.65287		215	250	95	-0.725866	0.467921	-0.725866	0.467921	15	15	0.486365		212	253	92
1656.85	6035.54	0.205424	189	246	84	-0.916515	0.359397	-0.916515	0.359397	14	15	0.376588		225	240	105	-0.311086	0.755736	-0.311086	0.755736	15	15	0.77484		244	221	101	0.476998	0.633364	0.476998	0.633364	15	15	0.65287		227	238	107	-0.228129	0.819546	-0.228129	0.819546	15	15	0.838135		253	212	92
1658.78	6028.52	0.205663	166	269	61	-1.92032	0.0548187	-1.92032	0.0548187	14	15	0.0567726		209	256	89	-0.974735	0.329693	-0.974735	0.329693	15	15	0.345311		242	223	103	0.394042	0.693551	0.394042	0.693551	15	15	0.712965		208	257	88	-1.01621	0.309529	-1.01621	0.309529	15	15	0.324548		235	230	110
1660.71	6021.52	0.205902	181	254	76	-1.26566	0.205634	-1.26566	0.205634	14	15	0.217176		207	258	87	-1.05769	0.290197	-1.05769	0.290197	15	15	0.304591		250	215	95	0.725866	0.467921	0.725866	0.467921	15	15	0.486365		228	237	108	-0.186651	0.851934	-0.186651	0.851934	15	15	0.870194		272	193	73
1662.64	6014.53	0.206141	177	258	72	-1.44024	0.149801	-1.44024	0.149801	14	15	0.158309		201	264	81	-1.30656	0.191363	-1.30656	0.191363	15	15	0.201679		236	229	109	0.145173	0.884574	0.145173	0.884574	15	15	0.902462		225	240	105	-0.311086	0.755736	-0.311086	0.755736	15	15	0.77484		230	235	110
1664.57	6007.56	0.20638	220	215	95	0.436436	0.662521	0.436436	0.662521	14	15	0.682954		231	234	111	-0.0622171	0.95039	-0.0622171	0.95039	15	15	0.967417		269	196	76	1.51395	0.13004	1.51395	0.13004	15	15	0.136974		265	200	80	1.34804	0.177647	1.34804	0.177647	15	15	0.187268		279	186	66
1666.5	6000.61	0.206619	205	230	100	-0.218218	0.827259	-0.218218	0.827259	14	15	0.846694		211	254	91	-0.891778	0.372512	-0.891778	0.372512	15	15	0.389233		248	217	97	0.64291	0.520283	0.64291	0.520283	15	15	0.539299		258	207	87	1.05769	0.290197	1.05769	0.290197	15	15	0.304591		272	193	73
1668.43	5993.67	0.206858	228	207	87	0.785584	0.432112	0.785584	0.432112	14	15	0.450872		242	223	103	0.394042	0.693551	0.394042	0.693551	15	15	0.712965		281	184	64	2.01169	0.0442538	2.01169	0.0442538	15	15	0.0453339		271	194	74	1.59691	0.110288	1.59691	0.110288	15	15	0.115979		281	184	64
1670.35	5986.75	0.207098	241	194	74	1.35295	0.176072	1.35295	0.176072	14	15	0.186083		264	201	81	1.30656	0.191363	1.30656	0.191363	15	15	0.201679		292	173	53	2.46795	0.0135896	2.46795	0.0135896	15	15	0.012799		277	188	68	1.84577	0.0649259	1.84577	0.0649259	15	15	0.0674962		285	180	60
1672.28	5979.85	0.207337	266	169	49	2.44404	0.0145243	2.44404	0.0145243	14	15	0.0137488	0.000630725	289	176	56	2.34351	0.0191038	2.34351	0.0191038	15	15	0.0185537		269	196	76	1.51395	0.13004	1.51395	0.13004	15	15	0.136974		287	178	58	2.26055	0.0237875	2.26055	0.0237875	15	15	0.0234961		272	193	73
1674.21	5972.96	0.207576	256	179	59	2.0076	0.0446862	2.0076	0.0446862	14	15	0.045875		271	194	74	1.59691	0.110288	1.59691	0.110288	15	15	0.115979		273	192	72	1.67986	0.0929852	1.67986	0.0929852	15	15	0.0975258		275	190	70	1.76282	0.0779322	1.76282	0.0779322	15	15	0.0814293		271	194	74
1676.14	5966.08	0.207815	231	204	84	0.916515	0.359397	0.916515	0.359397	14	15	0.376588		272	193	73	1.63838	0.101343	1.63838	0.101343	15	15	0.106446		244	221	101	0.476998	0.633364	0.476998	0.633364	15	15	0.65287		273	192	72	1.67986	0.0929852	1.67986	0.0929852	15	15	0.0975258		245	220	100
1678.07	5959.23	0.208054	227	208	88	0.741941	0.458124	0.741941	0.458124	14	15	0.477307		267	198	78	1.43099	0.152433	1.43099	0.152433	15	15	0.160685		239	226	106	0.269607	0.787462	0.269607	0.787462	15	15	0.806334		264	201	81	1.30656	0.191363	1.30656	0.191363	15	15	0.201679		242	223	103
1680	5952.39	0.208293	223	212	92	0.567367	0.570466	0.567367	0.570466	14	15	0.590745		262	203	83	1.2236	0.221103	1.2236	0.221103	15	15	0.232812		233	232	112	0.020739	0.983454	0.020739	0.983454	15	15	1		258	207	87	1.05769	0.290197	1.05769	0.290197	15	15	0.304591		237	228	108
1681.93	5945.56	0.208532	235	200	80	1.09109	0.275234	1.09109	0.275234	14	15	0.289776		261	204	84	1.18212	0.237157	1.18212	0.237157	15	15	0.249556		233	232	112	0.020739	0.983454	0.020739	0.983454	15	15	1		257	208	88	1.01621	0.309529	1.01621	0.309529	15	15	0.324548		253	212	92
1683.86	5938.75	0.208772	220	215	95	0.436436	0.662521	0.436436	0.662521	14	15	0.682954		264	201	81	1.30656	0.191363	1.30656	0.191363	15	15	0.201679		234	231	111	0.0622171	0.95039	0.0622171	0.95039	15	15	0.967417		255	210	90	0.933257	0.350688	0.933257	0.350688	15	15	0.366875		247	218	98
1685.79	5931.95	0.209011	215	220	100	0.218218	0.827259	0.218218	0.827259	14	15	0.846694		257	208	88	1.01621	0.309529	1.01621	0.309529	15	15	0.324548		238	227	107	0.228129	0.819546	0.228129	0.819546	15	15	0.838135		257	208	88	1.01621	0.309529	1.01621	0.309529	15	15	0.324548		239	226	106
1687.71	5925.17	0.20925	214	221	101	0.174574	0.861414	0.174574	0.861414	14	15	0.880478		256	209	89	0.974735	0.329693	0.974735	0.329693	15	15	0.345311		238	227	107	0.228129	0.819546	0.228129	0.819546	15	15	0.838135		245	220	100	0.518476	0.604127	0.518476	0.604127	15	15	0.623594		237	228	108
1689.64	5918.41	0.209489	211	224	104	0.0436436	0.965189	0.0436436	0.965189	14	15	0.982865		257	208	88	1.01621	0.309529	1.01621	0.309529	15	15	0.324548		237	228	108	0.186651	0.851934	0.186651	0.851934	15	15	0.870194		241	224	104	0.352564	0.724416	0.352564	0.724416	15	15	0.743702		234	231	111
1691.57	5911.66	0.209728	208	227	103	-0.0872872	0.930443	-0.0872872	0.930443	14	15	0.948623		257	208	88	1.01621	0.309529	1.01621	0.309529	15	15	0.324548		241	224	104	0.352564	0.724416	0.352564	0.724416	15	15	0.743702		236	229	109	0.145173	0.884574	0.145173	0.884574	15	15	0.902462		233	232	112
1693.5	5904.93	0.209967	207	228	102	-0.130931	0.89583	-0.130931	0.89583	14	15	0.914475		256	209	89	0.974735	0.329693	0.974735	0.329693	15	15	0.345311		242	223	103	0.394042	0.693551	0.394042	0.693551	15	15	0.712965		238	227	107	0.228129	0.819546	0.228129	0.819546	15	15	0.838135		240	225	105
1695.43	5898.21	0.210206	208	227	103	-0.0872872	0.930443	-0.0872872	0.930443	14	15	0.948623		257	208	88	1.01621	0.309529	1.01621	0.309529	15	15	0.324548		239	226	106	0.269607	0.787462	0.269607	0.787462	15	15	0.806334		234	231	111	0.0622171	0.95039	0.0622171	0.95039	15	15	0.967417		241	224	104
1697.36	5891.51	0.210446	210	225	105	0	1	0	1	14	15	1.01714		258	207	87	1.05769	0.290197	1.05769	0.290197	15	15	0.304591		241	224	104	0.352564	0.724416	0.352564	0.724416	15	15	0.743702		234	231	111	0.0622171	0.95039	0.0622171	0.95039	15	15	0.967417		237	228	108
1699.29	5884.82	0.210685	210	225	105	0	1	0	1	14	15	1.01714		259	206	86	1.09917	0.271695	1.09917	0.271695	15	15	0.285441		239	226	106	0.269607	0.787462	0.269607	0.787462	15	15	0.806334		229	236	109	-0.145173	0.884574	-0.145173	0.884574	15	15	0.902462		232	233	112
1701.22	5878.15	0.210924	208	227	103	-0.0872872	0.930443	-0.0872872	0.930443	14	15	0.948623		252	213	93	0.808822	0.418618	0.808822	0.418618	15	15	0.436289		237	228	108	0.186651	0.851934	0.186651	0.851934	15	15	0.870194		222	243	102	-0.43552	0.663186	-0.43552	0.663186	15	15	0.682674		228	237	108
1703.14	5871.49	0.211163	207	228	102	-0.130931	0.89583	-0.130931	0.89583	14	15	0.914475		253	212	92	0.8503	0.395159	0.8503	0.395159	15	15	0.412376		235	230	110	0.103695	0.917411	0.103695	0.917411	15	15	0.934887		222	243	102	-0.43552	0.663186	-0.43552	0.663186	15	15	0.682674		227	238	107
1705.07	5864.85	0.211402	207	228	102	-0.130931	0.89583	-0.130931	0.89583	14	15	0.914475		253	212	92	0.8503	0.395159	0.8503	0.395159	15	15	0.412376		234	231	111	0.0622171	0.95039	0.0622171	0.95039	15	15	0.967417		221	244	101	-0.476998	0.633364	-0.476998	0.633364	15	15	0.65287		225	240	105
1707	5858.22	0.211641	206	229	101	-0.174574	0.861414	-0.174574	0.861414	14	15	0.880478		250	215	95	0.725866	0.467921	0.725866	0.467921	15	15	0.486365		235	230	110	0.103695	0.917411	0.103695	0.917411	15	15	0.934887		218	247	98	-0.601432	0.547553	-0.601432	0.547553	15	15	0.566774		222	243	102
1708.93	5851.61	0.21188	205	230	100	-0.218218	0.827259	-0.218218	0.827259	14	15	0.846694		251	214	94	0.767344	0.442877	0.767344	0.442877	15	15	0.460959		235	230	110	0.103695	0.917411	0.103695	0.917411	15	15	0.934887		218	247	98	-0.601432	0.547553	-0.601432	0.547553	15	15	0.566774		224	241	104
1710.86	5845.01	0.21212	206	229	101	-0.174574	0.861414	-0.174574	0.861414	14	15	0.880478		251	214	94	0.767344	0.442877	0.767344	0.442877	15	15	0.460959		234	231	111	0.0622171	0.95039	0.0622171	0.95039	15	15	0.967417		217	248	97	-0.64291	0.520283	-0.64291	0.520283	15	15	0.539299		226	239	106
1712.79	5838.43	0.212359	209	226	104	-0.0436436	0.965189	-0.0436436	0.965189	14	15	0.982865		251	214	94	0.767344	0.442877	0.767344	0.442877	15	15	0.460959		236	229	109	0.145173	0.884574	0.145173	0.884574	15	15	0.902462		219	246	99	-0.559954	0.575511	-0.559954	0.575511	15	15	0.594884		230	235	110
1714.72	5831.86	0.212598	210	225	105	0	1	0	1	14	15	1.01714		251	214	94	0.767344	0.442877	0.767344	0.442877	15	15	0.460959		237	228	108	0.186651	0.851934	0.186651	0.851934	15	15	0.870194		220	245	100	-0.518476	0.604127	-0.518476	0.604127	15	15	0.623594		231	234	111
1716.65	5825.31	0.212837	207	228	102	-0.130931	0.89583	-0.130931	0.89583	14	15	0.914475		251	214	94	0.767344	0.442877	0.767344	0.442877	15	15	0.460959		236	229	109	0.145173	0.884574	0.145173	0.884574	15	15	0.902462		219	246	99	-0.559954	0.575511	-0.559954	0.575511	15	15	0.594884		228	237	108
1718.58	5818.77	0.213076	204	231	99	-0.261861	0.793428	-0.261861	0.793428	14	15	0.813179		248	217	97	0.64291	0.520283	0.64291	0.520283	15	15	0.539299		231	234	111	-0.0622171	0.95039	-0.0622171	0.95039	15	15	0.967417		217	248	97	-0.64291	0.520283	-0.64291	0.520283	15	15	0.539299		219	246	99
1720.5	5812.25	0.213315	203	232	98	-0.305505	0.759982	-0.305505	0.759982	14	15	0.779995		250	215	95	0.725866	0.467921	0.725866	0.467921	15	15	0.486365		232	233	112	-0.020739	0.983454	-0.020739	0.983454	15	15	1		220	245	100	-0.518476	0.604127	-0.518476	0.604127	15	15	0.623594		227	238	107
1722.43	5805.74	0.213554	203	232	98	-0.305505	0.759982	-0.305505	0.759982	14	15	0.779995		250	215	95	0.725866	0.467921	0.725866	0.467921	15	15	0.486365		232	233	112	-0.020739	0.983454	-0.020739	0.983454	15	15	1		220	245	100	-0.518476	0.604127	-0.518476	0.604127	15	15	0.623594		227	238	107
1724.36	5799.25	0.213794	203	232	98	-0.305505	0.759982	-0.305505	0.759982	14	15	0.779995		250	215	95	0.725866	0.467921	0.725866	0.467921	15	15	0.486365		232	233	112	-0.020739	0.983454	-0.020739	0.983454	15	15	1		220	245	100	-0.518476	0.604127	-0.518476	0.604127	15	15	0.623594		226	239	106
1726.29	5792.77	0.214033	204	231	99	-0.261861	0.793428	-0.261861	0.793428	14	15	0.813179		250	215	95	0.725866	0.467921	0.725866	0.467921	15	15	0.486365		233	232	112	0.020739	0.983454	0.020739	0.983454	15	15	1		220	245	100	-0.518476	0.604127	-0.518476	0.604127	15	15	0.623594		227	238	107
1728.22	5786.3	0.214272	203	232	98	-0.305505	0.759982	-0.305505	0.759982	14	15	0.779995		250	215	95	0.725866	0.467921	0.725866	0.467921	15	15	0.486365		234	231	111	0.0622171	0.95039	0.0622171	0.95039	15	15	0.967417		221	244	101	-0.476998	0.633364	-0.476998	0.633364	15	15	0.65287		233	232	112
1730.15	5779.85	0.214511	206	229	101	-0.174574	0.861414	-0.174574	0.861414	14	15	0.880478		250	215	95	0.725866	0.467921	0.725866	0.467921	15	15	0.486365		234	231	111	0.0622171	0.95039	0.0622171	0.95039	15	15	0.967417		222	243	102	-0.43552	0.663186	-0.43552	0.663186	15	15	0.682674		231	234	111
1732.08	5773.42	0.21475	205	230	100	-0.218218	0.827259	-0.218218	0.827259	14	15	0.846694		251	214	94	0.767344	0.442877	0.767344	0.442877	15	15	0.460959		234	231	111	0.0622171	0.95039	0.0622171	0.95039	15	15	0.967417		220	245	100	-0.518476	0.604127	-0.518476	0.604127	15	15	0.623594		229	236	109
1734.01	5766.99	0.214989	204	231	99	-0.261861	0.793428	-0.261861	0.793428	14	15	0.813179		247	218	98	0.601432	0.547553	0.601432	0.547553	15	15	0.566774		228	237	108	-0.186651	0.851934	-0.186651	0.851934	15	15	0.870194		217	248	97	-0.64291	0.520283	-0.64291	0.520283	15	15	0.539299		221	244	101
1735.93	5760.59	0.215228	204	231	99	-0.261861	0.793428	-0.261861	0.793428	14	15	0.813179		248	217	97	0.64291	0.520283	0.64291	0.520283	15	15	0.539299		230	235	110	-0.103695	0.917411	-0.103695	0.917411	15	15	0.934887		219	246	99	-0.559954	0.575511	-0.559954	0.575511	15	15	0.594884		226	239	106
1737.86	5754.19	0.215468	204	231	99	-0.261861	0.793428	-0.261861	0.793428	14	15	0.813179		249	216	96	0.684388	0.493731	0.684388	0.493731	15	15	0.512486		232	233	112	-0.020739	0.983454	-0.020739	0.983454	15	15	1		221	244	101	-0.476998	0.633364	-0.476998	0.633364	15	15	0.65287		229	236	109
1739.79	5747.81	0.215707	203	232	98	-0.305505	0.759982	-0.305505	0.759982	14	15	0.779995		248	217	97	0.64291	0.520283	0.64291	0.520283	15	15	0.539299		230	235	110	-0.103695	0.917411	-0.103695	0.917411	15	15	0.934887		222	243	102	-0.43552	0.663186	-0.43552	0.663186	15	15	0.682674		231	234	111
1741.72	5741.45	0.215946	203	232	98	-0.305505	0.759982	-0.305505	0.759982	14	15	0.779995		248	217	97	0.64291	0.520283	0.64291	0.520283	15	15	0.539299		230	235	110	-0.103695	0.917411	-0.103695	0.917411	15	15	0.934887		222	243	102	-0.43552	0.663186	-0.43552	0.663186	15	15	0.682674		231	234	111
1743.65	5735.1	0.216185	203	232	98	-0.305505	0.759982	-0.305505	0.759982	14	15	0.779995		248	217	97	0.64291	0.520283	0.64291	0.520283	15	15	0.539299		228	237	108	-0.186651	0.851934	-0.186651	0.851934	15	15	0.870194		221	244	101	-0.476998	0.633364	-0.476998	0.633364	15	15	0.65287		230	235	110
1745.58	5728.76	0.216424	203	232	98	-0.305505	0.759982	-0.305505	0.759982	14	15	0.779995		248	217	97	0.64291	0.520283	0.64291	0.520283	15	15	0.539299		230	235	110	-0.103695	0.917411	-0.103695	0.917411	15	15	0.934887		222	243	102	-0.43552	0.663186	-0.43552	0.663186	15	15	0.682674		228	237	108
1747.51	5722.44	0.216663	204	231	99	-0.261861	0.793428	-0.261861	0.793428	14	15	0.813179		249	216	96	0.684388	0.493731	0.684388	0.493731	15	15	0.512486		228	237	108	-0.186651	0.851934	-0.186651	0.851934	15	15	0.870194		220	245	100	-0.518476	0.604127	-0.518476	0.604127	15	15	0.623594		228	237	108
1749.44	5716.13	0.216902	204	231	99	-0.261861	0.793428	-0.261861	0.793428	14	15	0.813179		249	216	96	0.684388	0.493731	0.684388	0.493731	15	15	0.512486		227	238	107	-0.228129	0.819546	-0.228129	0.819546	15	15	0.838135		220	245	100	-0.518476	0.604127	-0.518476	0.604127	15	15	0.623594		228	237	108
1751.36	5709.83	0.217142	203	232	98	-0.305505	0.759982	-0.305505	0.759982	14	15	0.779995		247	218	98	0.601432	0.547553	0.601432	0.547553	15	15	0.566774		227	238	107	-0.228129	0.819546	-0.228129	0.819546	15	15	0.838135		221	244	101	-0.476998	0.633364	-0.476998	0.633364	15	15	0.65287		230	235	110
1753.29	5703.55	0.217381	203	232	98	-0.305505	0.759982	-0.305505	0.759982	14	15	0.779995		249	216	96	0.684388	0.493731	0.684388	0.493731	15	15	0.512486		227	238	107	-0.228129	0.819546	-0.228129	0.819546	15	15	0.838135		220	245	100	-0.518476	0.604127	-0.518476	0.604127	15	15	0.623594		233	232	112
1755.22	5697.28	0.21762	203	232	98	-0.305505	0.759982	-0.305505	0.759982	14	15	0.779995		249	216	96	0.684388	0.493731	0.684388	0.493731	15	15	0.512486		227	238	107	-0.228129	0.819546	-0.228129	0.819546	15	15	0.838135		221	244	101	-0.476998	0.633364	-0.476998	0.633364	15	15	0.65287		232	233	112
1757.15	5691.03	0.217859	204	231	99	-0.261861	0.793428	-0.261861	0.793428	14	15	0.813179		249	216	96	0.684388	0.493731	0.684388	0.493731	15	15	0.512486		226	239	106	-0.269607	0.787462	-0.269607	0.787462	15	15	0.806334		220	245	100	-0.518476	0.604127	-0.518476	0.604127	15	15	0.623594		232	233	112
1759.08	5684.79	0.218098	203	232	98	-0.305505	0.759982	-0.305505	0.759982	14	15	0.779995		249	216	96	0.684388	0.493731	0.684388	0.493731	15	15	0.512486		227	238	107	-0.228129	0.819546	-0.228129	0.819546	15	15	0.838135		220	245	100	-0.518476	0.604127	-0.518476	0.604127	15	15	0.623594		232	233	112
1761.01	5678.56	0.218337	203	232	98	-0.305505	0.759982	-0.305505	0.759982	14	15	0.779995		247	218	98	0.601432	0.547553	0.601432	0.547553	15	15	0.566774		226	239	106	-0.269607	0.787462	-0.269607	0.787462	15	15	0.806334		221	244	101	-0.476998	0.633364	-0.476998	0.633364	15	15	0.65287		230	235	110
1762.94	5672.35	0.218576	204	231	99	-0.261861	0.793428	-0.261861	0.793428	14	15	0.813179		244	221	101	0.476998	0.633364	0.476998	0.633364	15	15	0.65287		226	239	106	-0.269607	0.787462	-0.269607	0.787462	15	15	0.806334		220	245	100	-0.518476	0.604127	-0.518476	0.604127	15	15	0.623594		228	237	108
1764.87	5666.15	0.218816	204	231	99	-0.261861	0.793428	-0.261861	0.793428	14	15	0.813179		248	217	97	0.64291	0.520283	0.64291	0.520283	15	15	0.539299		226	239	106	-0.269607	0.787462	-0.269607	0.787462	15	15	0.806334		223	242	103	-0.394042	0.693551	-0.394042	0.693551	15	15	0.712965		232	233	112
1766.8	5659.96	0.219055	204	231	99	-0.261861	0.793428	-0.261861	0.793428	14	15	0.813179		248	217	97	0.64291	0.520283	0.64291	0.520283	15	15	0.539299		226	239	106	-0.269607	0.787462	-0.269607	0.787462	15	15	0.806334		221	244	101	-0.476998	0.633364	-0.476998	0.633364	15	15	0.65287		232	233	112
1768.72	5653.79	0.219294	204	231	99	-0.261861	0.793428	-0.261861	0.793428	14	15	0.813179		250	215	95	0.725866	0.467921	0.725866	0.467921	15	15	0.486365		226	239	106	-0.269607	0.787462	-0.269607	0.787462	15	15	0.806334		222	243	102	-0.43552	0.663186	-0.43552	0.663186	15	15	0.682674		231	234	111
1770.65	5647.63	0.219533	203	232	98	-0.305505	0.759982	-0.305505	0.759982	14	15	0.779995		249	216	96	0.684388	0.493731	0.684388	0.493731	15	15	0.512486		226	239	106	-0.269607	0.787462	-0.269607	0.787462	15	15	0.806334		224	241	104	-0.352564	0.724416	-0.352564	0.724416	15	15	0.743702		232	233	112
1772.58	5641.49	0.219772	204	231	99	-0.261861	0.793428	-0.261861	0.793428	14	15	0.813179		244	221	101	0.476998	0.633364	0.476998	0.633364	15	15	0.65287		224	241	104	-0.352564	0.724416	-0.352564	0.724416	15	15	0.743702		224	241	104	-0.352564	0.724416	-0.352564	0.724416	15	15	0.743702		223	242	103
1774.51	5635.36	0.220011	204	231	99	-0.261861	0.793428	-0.261861	0.793428	14	15	0.813179		244	221	101	0.476998	0.633364	0.476998	0.633364	15	15	0.65287		223	242	103	-0.394042	0.693551	-0.394042	0.693551	15	15	0.712965		222	243	102	-0.43552	0.663186	-0.43552	0.663186	15	15	0.682674		228	237	108
1776.44	5629.24	0.22025	204	231	99	-0.261861	0.793428	-0.261861	0.793428	14	15	0.813179		241	224	104	0.352564	0.724416	0.352564	0.724416	15	15	0.743702		223	242	103	-0.394042	0.693551	-0.394042	0.693551	15	15	0.712965		221	244	101	-0.476998	0.633364	-0.476998	0.633364	15	15	0.65287		228	237	108
1778.37	5623.13	0.22049	204	231	99	-0.261861	0.793428	-0.261861	0.793428	14	15	0.813179		242	223	103	0.394042	0.693551	0.394042	0.693551	15	15	0.712965		223	242	103	-0.394042	0.693551	-0.394042	0.693551	15	15	0.712965		222	243	102	-0.43552	0.663186	-0.43552	0.663186	15	15	0.682674		229	236	109
1780.3	5617.04	0.220729	204	231	99	-0.261861	0.793428	-0.261861	0.793428	14	15	0.813179		244	221	101	0.476998	0.633364	0.476998	0.633364	15	15	0.65287		223	242	103	-0.394042	0.693551	-0.394042	0.693551	15	15	0.712965		222	243	102	-0.43552	0.663186	-0.43552	0.663186	15	15	0.682674		228	237	108
1782.23	5610.96	0.220968	204	231	99	-0.261861	0.793428	-0.261861	0.793428	14	15	0.813179		242	223	103	0.394042	0.693551	0.394042	0.693551	15	15	0.712965		223	242	103	-0.394042	0.693551	-0.394042	0.693551	15	15	0.712965		224	241	104	-0.352564	0.724416	-0.352564	0.724416	15	15	0.743702		230	235	110
1784.15	5604.89	0.221207	203	232	98	-0.305505	0.759982	-0.305505	0.759982	14	15	0.779995		244	221	101	0.476998	0.633364	0.476998	0.633364	15	15	0.65287		223	242	103	-0.394042	0.693551	-0.394042	0.693551	15	15	0.712965		224	241	104	-0.352564	0.724416	-0.352564	0.724416	15	15	0.743702		231	234	111
1786.08	5598.84	0.221446	203	232	98	-0.305505	0.759982	-0.305505	0.759982	14	15	0.779995		242	223	103	0.394042	0.693551	0.394042	0.693551	15	15	0.712965		223	242	103	-0.394042	0.693551	-0.394042	0.693551	15	15	0.712965		223	242	103	-0.394042	0.693551	-0.394042	0.693551	15	15	0.712965		230	235	110
1788.01	5592.8	0.221685	203	232	98	-0.305505	0.759982	-0.305505	0.759982	14	15	0.779995		244	221	101	0.476998	0.633364	0.476998	0.633364	15	15	0.65287		223	242	103	-0.394042	0.693551	-0.394042	0.693551	15	15	0.712965		223	242	103	-0.394042	0.693551	-0.394042	0.693551	15	15	0.712965		230	235	110
1789.94	5586.78	0.221924	204	231	99	-0.261861	0.793428	-0.261861	0.793428	14	15	0.813179		249	216	96	0.684388	0.493731	0.684388	0.493731	15	15	0.512486		224	241	104	-0.352564	0.724416	-0.352564	0.724416	15	15	0.743702		223	242	103	-0.394042	0.693551	-0.394042	0.693551	15	15	0.712965		230	235	110
1791.87	5580.76	0.222164	205	230	100	-0.218218	0.827259	-0.218218	0.827259	14	15	0.846694		244	221	101	0.476998	0.633364	0.476998	0.633364	15	15	0.65287		224	241	104	-0.352564	0.724416	-0.352564	0.724416	15	15	0.743702		221	244	101	-0.476998	0.633364	-0.476998	0.633364	15	15	0.65287		229	236	109
1793.8	5574.76	0.222403	206	229	101	-0.174574	0.861414	-0.174574	0.861414	14	15	0.880478		243	222	102	0.43552	0.663186	0.43552	0.663186	15	15	0.682674		222	243	102	-0.43552	0.663186	-0.43552	0.663186	15	15	0.682674		222	243	102	-0.43552	0.663186	-0.43552	0.663186	15	15	0.682674		227	238	107
1795.73	5568.77	0.222642	205	230	100	-0.218218	0.827259	-0.218218	0.827259	14	15	0.846694		244	221	101	0.476998	0.633364	0.476998	0.633364	15	15	0.65287		224	241	104	-0.352564	0.724416	-0.352564	0.724416	15	15	0.743702		222	243	102	-0.43552	0.663186	-0.43552	0.663186	15	15	0.682674		229	236	109
1797.66	5562.8	0.222881	206	229	101	-0.174574	0.861414	-0.174574	0.861414	14	15	0.880478		244	221	101	0.476998	0.633364	0.476998	0.633364	15	15	0.65287		224	241	104	-0.352564	0.724416	-0.352564	0.724416	15	15	0.743702		222	243	102	-0.43552	0.663186	-0.43552	0.663186	15	15	0.682674		230	235	110
1799.59	5556.84	0.22312	206	229	101	-0.174574	0.861414	-0.174574	0.861414	14	15	0.880478		245	220	100	0.518476	0.604127	0.518476	0.604127	15	15	0.623594		224	241	104	-0.352564	0.724416	-0.352564	0.724416	15	15	0.743702		223	242	103	-0.394042	0.693551	-0.394042	0.693551	15	15	0.712965		230	235	110
1801.51	5550.89	0.223359	206	229	101	-0.174574	0.861414	-0.174574	0.861414	14	15	0.880478		244	221	101	0.476998	0.633364	0.476998	0.633364	15	15	0.65287		222	243	102	-0.43552	0.663186	-0.43552	0.663186	15	15	0.682674		223	242	103	-0.394042	0.693551	-0.394042	0.693551	15	15	0.712965		227	238	107
1803.44	5544.95	0.223598	204	231	99	-0.261861	0.793428	-0.261861	0.793428	14	15	0.813179		243	222	102	0.43552	0.663186	0.43552	0.663186	15	15	0.682674		221	244	101	-0.476998	0.633364	-0.476998	0.633364	15	15	0.65287		223	242	103	-0.394042	0.693551	-0.394042	0.693551	15	15	0.712965		228	237	108
1805.37	5539.03	0.223838	204	231	99	-0.261861	0.793428	-0.261861	0.793428	14	15	0.813179		243	222	102	0.43552	0.663186	0.43552	0.663186	15	15	0.682674		222	243	102	-0.43552	0.663186	-0.43552	0.663186	15	15	0.682674		223	242	103	-0.394042	0.693551	-0.394042	0.693551	15	15	0.712965		231	234	111
1807.3	5533.11	0.224077	204	231	99	-0.261861	0.793428	-0.261861	0.793428	14	15	0.813179		242	223	103	0.394042	0.693551	0.394042	0.693551	15	15	0.712965		223	242	103	-0.394042	0.693551	-0.394042	0.693551	15	15	0.712965		224	241	104	-0.352564	0.724416	-0.352564	0.724416	15	15	0.743702		231	234	111
1809.23	5527.22	0.224316	204	231	99	-0.261861	0.793428	-0.261861	0.793428	14	15	0.813179		243	222	102	0.43552	0.663186	0.43552	0.663186	15	15	0.682674		223	242	103	-0.394042	0.693551	-0.394042	0.693551	15	15	0.712965		224	241	104	-0.352564	0.724416	-0.352564	0.724416	15	15	0.743702		229	236	109
1811.16	5521.33	0.224555	203	232	98	-0.305505	0.759982	-0.305505	0.759982	14	15	0.779995		243	222	102	0.43552	0.663186	0.43552	0.663186	15	15	0.682674		220	245	100	-0.518476	0.604127	-0.518476	0.604127	15	15	0.623594		224	241	104	-0.352564	0.724416	-0.352564	0.724416	15	15	0.743702		227	238	107
1813.09	5515.46	0.224794	203	232	98	-0.305505	0.759982	-0.305505	0.759982	14	15	0.779995		242	223	103	0.394042	0.693551	0.394042	0.693551	15	15	0.712965		220	245	100	-0.518476	0.604127	-0.518476	0.604127	15	15	0.623594		225	240	105	-0.311086	0.755736	-0.311086	0.755736	15	15	0.77484		228	237	108
1815.02	5509.59	0.225033	203	232	98	-0.305505	0.759982	-0.305505	0.759982	14	15	0.779995		242	223	103	0.394042	0.693551	0.394042	0.693551	15	15	0.712965		222	243	102	-0.43552	0.663186	-0.43552	0.663186	15	15	0.682674		225	240	105	-0.311086	0.755736	-0.311086	0.755736	15	15	0.77484		231	234	111
1816.94	5503.74	0.225272	205	230	100	-0.218218	0.827259	-0.218218	0.827259	14	15	0.846694		242	223	103	0.394042	0.693551	0.394042	0.693551	15	15	0.712965		221	244	101	-0.476998	0.633364	-0.476998	0.633364	15	15	0.65287		225	240	105	-0.311086	0.755736	-0.311086	0.755736	15	15	0.77484		229	236	109
1818.87	5497.91	0.225512	203	232	98	-0.305505	0.759982	-0.305505	0.759982	14	15	0.779995		242	223	103	0.394042	0.693551	0.394042	0.693551	15	15	0.712965		220	245	100	-0.518476	0.604127	-0.518476	0.604127	15	15	0.623594		225	240	105	-0.311086	0.755736	-0.311086	0.755736	15	15	0.77484		230	235	110
1820.8	5492.08	0.225751	203	232	98	-0.305505	0.759982	-0.305505	0.759982	14	15	0.779995		242	223	103	0.394042	0.693551	0.394042	0.693551	15	15	0.712965		223	242	103	-0.394042	0.693551	-0.394042	0.693551	15	15	0.712965		225	240	105	-0.311086	0.755736	-0.311086	0.755736	15	15	0.77484		231	234	111
1822.73	5486.27	0.22599	202	233	97	-0.349149	0.726978	-0.349149	0.726978	14	15	0.747192		243	222	102	0.43552	0.663186	0.43552	0.663186	15	15	0.682674		222	243	102	-0.43552	0.663186	-0.43552	0.663186	15	15	0.682674		224	241	104	-0.352564	0.724416	-0.352564	0.724416	15	15	0.743702		231	234	111
1824.66	5480.47	0.226229	205	230	100	-0.218218	0.827259	-0.218218	0.827259	14	15	0.846694		243	222	102	0.43552	0.663186	0.43552	0.663186	15	15	0.682674		219	246	99	-0.559954	0.575511	-0.559954	0.575511	15	15	0.594884		224	241	104	-0.352564	0.724416	-0.352564	0.724416	15	15	0.743702		229	236	109
1826.59	5474.69	0.226468	205	230	100	-0.218218	0.827259	-0.218218	0.827259	14	15	0.846694		245	220	100	0.518476	0.604127	0.518476	0.604127	15	15	0.623594		220	245	100	-0.518476	0.604127	-0.518476	0.604127	15	15	0.623594		224	241	104	-0.352564	0.724416	-0.352564	0.724416	15	15	0.743702		230	235	110
1828.52	5468.91	0.226707	208	227	103	-0.0872872	0.930443	-0.0872872	0.930443	14	15	0.948623		245	220	100	0.518476	0.604127	0.518476	0.604127	15	15	0.623594		219	246	99	-0.559954	0.575511	-0.559954	0.575511	15	15	0.594884		224	241	104	-0.352564	0.724416	-0.352564	0.724416	15	15	0.743702		229	236	109
1830.45	5463.15	0.226946	207	228	102	-0.130931	0.89583	-0.130931	0.89583	14	15	0.914475		243	222	102	0.43552	0.663186	0.43552	0.663186	15	15	0.682674		219	246	99	-0.559954	0.575511	-0.559954	0.575511	15	15	0.594884		224	241	104	-0.352564	0.724416	-0.352564	0.724416	15	15	0.743702		226	239	106
1832.38	5457.4	0.227186	206	229	101	-0.174574	0.861414	-0.174574	0.861414	14	15	0.880478		242	223	103	0.394042	0.693551	0.394042	0.693551	15	15	0.712965		219	246	99	-0.559954	0.575511	-0.559954	0.575511	15	15	0.594884		224	241	104	-0.352564	0.724416	-0.352564	0.724416	15	15	0.743702		230	235	110
1834.3	5451.66	0.227425	208	227	103	-0.0872872	0.930443	-0.0872872	0.930443	14	15	0.948623		242	223	103	0.394042	0.693551	0.394042	0.693551	15	15	0.712965		219	246	99	-0.559954	0.575511	-0.559954	0.575511	15	15	0.594884		224	241	104	-0.352564	0.724416	-0.352564	0.724416	15	15	0.743702		230	235	110
1836.23	5445.93	0.227664	207	228	102	-0.130931	0.89583	-0.130931	0.89583	14	15	0.914475		242	223	103	0.394042	0.693551	0.394042	0.693551	15	15	0.712965		219	246	99	-0.559954	0.575511	-0.559954	0.575511	15	15	0.594884		224	241	104	-0.352564	0.724416	-0.352564	0.724416	15	15	0.743702		229	236	109
1838.16	5440.22	0.227903	207	228	102	-0.130931	0.89583	-0.130931	0.89583	14	15	0.914475		242	223	103	0.394042	0.693551	0.394042	0.693551	15	15	0.712965		219	246	99	-0.559954	0.575511	-0.559954	0.575511	15	15	0.594884		224	241	104	-0.352564	0.724416	-0.352564	0.724416	15	15	0.743702		230	235	110
1840.09	5434.52	0.228142	207	228	102	-0.130931	0.89583	-0.130931	0.89583	14	15	0.914475		242	223	103	0.394042	0.693551	0.394042	0.693551	15	15	0.712965		218	247	98	-0.601432	0.547553	-0.601432	0.547553	15	15	0.566774		224	241	104	-0.352564	0.724416	-0.352564	0.724416	15	15	0.743702		231	234	111
1842.02	5428.82	0.228381	209	226	104	-0.0436436	0.965189	-0.0436436	0.965189	14	15	0.982865		243	222	102	0.43552	0.663186	0.43552	0.663186	15	15	0.682674		221	244	101	-0.476998	0.633364	-0.476998	0.633364	15	15	0.65287		224	241	104	-0.352564	0.724416	-0.352564	0.724416	15	15	0.743702		232	233	112
1843.95	5423.15	0.22862	210	225	105	0	1	0	1	14	15	1.01714		243	222	102	0.43552	0.663186	0.43552	0.663186	15	15	0.682674		219	246	99	-0.559954	0.575511	-0.559954	0.575511	15	15	0.594884		225	240	105	-0.311086	0.755736	-0.311086	0.755736	15	15	0.77484		227	238	107
1845.88	5417.48	0.22886	208	227	103	-0.0872872	0.930443	-0.0872872	0.930443	14	15	0.948623		243	222	102	0.43552	0.663186	0.43552	0.663186	15	15	0.682674		220	245	100	-0.518476	0.604127	-0.518476	0.604127	15	15	0.623594		224	241	104	-0.352564	0.724416	-0.352564	0.724416	15	15	0.743702		227	238	107
1847.81	5411.82	0.229099	209	226	104	-0.0436436	0.965189	-0.0436436	0.965189	14	15	0.982865		243	222	102	0.43552	0.663186	0.43552	0.663186	15	15	0.682674		220	245	100	-0.518476	0.604127	-0.518476	0.604127	15	15	0.623594		224	241	104	-0.352564	0.724416	-0.352564	0.724416	15	15	0.743702		227	238	107
1849.73	5406.18	0.229338	211	224	104	0.0436436	0.965189	0.0436436	0.965189	14	15	0.982865		242	223	103	0.394042	0.693551	0.394042	0.693551	15	15	0.712965		219	246	99	-0.559954	0.575511	-0.559954	0.575511	15	15	0.594884		226	239	106	-0.269607	0.787462	-0.269607	0.787462	15	15	0.806334		228	237	108
1851.66	5400.55	0.229577	211	224	104	0.0436436	0.965189	0.0436436	0.965189	14	15	0.982865		242	223	103	0.394042	0.693551	0.394042	0.693551	15	15	0.712965		219	246	99	-0.559954	0.575511	-0.559954	0.575511	15	15	0.594884		226	239	106	-0.269607	0.787462	-0.269607	0.787462	15	15	0.806334		228	237	108
1853.59	5394.93	0.229816	211	224	104	0.0436436	0.965189	0.0436436	0.965189	14	15	0.982865		242	223	103	0.394042	0.693551	0.394042	0.693551	15	15	0.712965		219	246	99	-0.559954	0.575511	-0.559954	0.575511	15	15	0.594884		226	239	106	-0.269607	0.787462	-0.269607	0.787462	15	15	0.806334		228	237	108
1855.52	5389.32	0.230055	212	223	103	0.0872872	0.930443	0.0872872	0.930443	14	15	0.948623		240	225	105	0.311086	0.755736	0.311086	0.755736	15	15	0.77484		219	246	99	-0.559954	0.575511	-0.559954	0.575511	15	15	0.594884		226	239	106	-0.269607	0.787462	-0.269607	0.787462	15	15	0.806334		228	237	108
1857.45	5383.73	0.230294	211	224	104	0.0436436	0.965189	0.0436436	0.965189	14	15	0.982865		241	224	104	0.352564	0.724416	0.352564	0.724416	15	15	0.743702		219	246	99	-0.559954	0.575511	-0.559954	0.575511	15	15	0.594884		226	239	106	-0.269607	0.787462	-0.269607	0.787462	15	15	0.806334		227	238	107
1859.38	5378.14	0.230534	212	223	103	0.0872872	0.930443	0.0872872	0.930443	14	15	0.948623		241	224	104	0.352564	0.724416	0.352564	0.724416	15	15	0.743702		219	246	99	-0.559954	0.575511	-0.559954	0.575511	15	15	0.594884		226	239	106	-0.269607	0.787462	-0.269607	0.787462	15	15	0.806334		227	238	107
1861.31	5372.57	0.230773	212	223	103	0.0872872	0.930443	0.0872872	0.930443	14	15	0.948623		241	224	104	0.352564	0.724416	0.352564	0.724416	15	15	0.743702		219	246	99	-0.559954	0.575511	-0.559954	0.575511	15	15	0.594884		226	239	106	-0.269607	0.787462	-0.269607	0.787462	15	15	0.806334		227	238	107
1863.24	5367.01	0.231012	212	223	103	0.0872872	0.930443	0.0872872	0.930443	14	15	0.948623		241	224	104	0.352564	0.724416	0.352564	0.724416	15	15	0.743702		219	246	99	-0.559954	0.575511	-0.559954	0.575511	15	15	0.594884		226	239	106	-0.269607	0.787462	-0.269607	0.787462	15	15	0.806334		228	237	108
1865.17	5361.46	0.231251	211	224	104	0.0436436	0.965189	0.0436436	0.965189	14	15	0.982865		243	222	102	0.43552	0.663186	0.43552	0.663186	15	15	0.682674		219	246	99	-0.559954	0.575511	-0.559954	0.575511	15	15	0.594884		224	241	104	-0.352564	0.724416	-0.352564	0.724416	15	15	0.743702		227	238	107
1867.09	5355.92	0.23149	212	223	103	0.0872872	0.930443	0.0872872	0.930443	14	15	0.948623		243	222	102	0.43552	0.663186	0.43552	0.663186	15	15	0.682674		220	245	100	-0.518476	0.604127	-0.518476	0.604127	15	15	0.623594		225	240	105	-0.311086	0.755736	-0.311086	0.755736	15	15	0.77484		227	238	107
1869.02	5350.39	0.231729	211	224	104	0.0436436	0.965189	0.0436436	0.965189	14	15	0.982865		242	223	103	0.394042	0.693551	0.394042	0.693551	15	15	0.712965		219	246	99	-0.559954	0.575511	-0.559954	0.575511	15	15	0.594884		223	242	103	-0.394042	0.693551	-0.394042	0.693551	15	15	0.712965		227	238	107
1870.95	5344.87	0.231968	211	224	104	0.0436436	0.965189	0.0436436	0.965189	14	15	0.982865		243	222	102	0.43552	0.663186	0.43552	0.663186	15	15	0.682674		218	247	98	-0.601432	0.547553	-0.601432	0.547553	15	15	0.566774		226	239	106	-0.269607	0.787462	-0.269607	0.787462	15	15	0.806334		227	238	107
1872.88	5339.37	0.232208	213	222	102	0.130931	0.89583	0.130931	0.89583	14	15	0.914475		243	222	102	0.43552	0.663186	0.43552	0.663186	15	15	0.682674		218	247	98	-0.601432	0.547553	-0.601432	0.547553	15	15	0.566774		227	238	107	-0.228129	0.819546	-0.228129	0.819546	15	15	0.838135		227	238	107
1874.81	5333.88	0.232447	213	222	102	0.130931	0.89583	0.130931	0.89583	14	15	0.914475		243	222	102	0.43552	0.663186	0.43552	0.663186	15	15	0.682674		218	247	98	-0.601432	0.547553	-0.601432	0.547553	15	15	0.566774		229	236	109	-0.145173	0.884574	-0.145173	0.884574	15	15	0.902462		228	237	108
1876.74	5328.39	0.232686	213	222	102	0.130931	0.89583	0.130931	0.89583	14	15	0.914475		243	222	102	0.43552	0.663186	0.43552	0.663186	15	15	0.682674		218	247	98	-0.601432	0.547553	-0.601432	0.547553	15	15	0.566774		231	234	111	-0.0622171	0.95039	-0.0622171	0.95039	15	15	0.967417		228	237	108
1878.67	5322.92	0.232925	212	223	103	0.0872872	0.930443	0.0872872	0.930443	14	15	0.948623		243	222	102	0.43552	0.663186	0.43552	0.663186	15	15	0.682674		218	247	98	-0.601432	0.547553	-0.601432	0.547553	15	15	0.566774		230	235	110	-0.103695	0.917411	-0.103695	0.917411	15	15	0.934887		228	237	108
1880.6	5317.46	0.233164	212	223	103	0.0872872	0.930443	0.0872872	0.930443	14	15	0.948623		243	222	102	0.43552	0.663186	0.43552	0.663186	15	15	0.682674		218	247	98	-0.601432	0.547553	-0.601432	0.547553	15	15	0.566774		229	236	109	-0.145173	0.884574	-0.145173	0.884574	15	15	0.902462		228	237	108
1882.52	5312.02	0.233403	213	222	102	0.130931	0.89583	0.130931	0.89583	14	15	0.914475		243	222	102	0.43552	0.663186	0.43552	0.663186	15	15	0.682674		218	247	98	-0.601432	0.547553	-0.601432	0.547553	15	15	0.566774		229	236	109	-0.145173	0.884574	-0.145173	0.884574	15	15	0.902462		228	237	108
1884.45	5306.58	0.233642	212	223	103	0.0872872	0.930443	0.0872872	0.930443	14	15	0.948623		243	222	102	0.43552	0.663186	0.43552	0.663186	15	15	0.682674		218	247	98	-0.601432	0.547553	-0.601432	0.547553	15	15	0.566774		230	235	110	-0.103695	0.917411	-0.103695	0.917411	15	15	0.934887		228	237	108
1886.38	5301.15	0.233882	212	223	103	0.0872872	0.930443	0.0872872	0.930443	14	15	0.948623		243	222	102	0.43552	0.663186	0.43552	0.663186	15	15	0.682674		219	246	99	-0.559954	0.575511	-0.559954	0.575511	15	15	0.594884		228	237	108	-0.186651	0.851934	-0.186651	0.851934	15	15	0.870194		228	237	108
1888.31	5295.74	0.234121	209	226	104	-0.0436436	0.965189	-0.0436436	0.965189	14	15	0.982865		242	223	103	0.394042	0.693551	0.394042	0.693551	15	15	0.712965		219	246	99	-0.559954	0.575511	-0.559954	0.575511	15	15	0.594884		227	238	107	-0.228129	0.819546	-0.228129	0.819546	15	15	0.838135		228	237	108
1890.24	5290.33	0.23436	210	225	105	0	1	0	1	14	15	1.01714		242	223	103	0.394042	0.693551	0.394042	0.693551	15	15	0.712965		219	246	99	-0.559954	0.575511	-0.559954	0.575511	15	15	0.594884		228	237	108	-0.186651	0.851934	-0.186651	0.851934	15	15	0.870194		226	239	106
1892.17	5284.94	0.234599	211	224	104	0.0436436	0.965189	0.0436436	0.965189	14	15	0.982865		244	221	101	0.476998	0.633364	0.476998	0.633364	15	15	0.65287		218	247	98	-0.601432	0.547553	-0.601432	0.547553	15	15	0.566774		229	236	109	-0.145173	0.884574	-0.145173	0.884574	15	15	0.902462		228	237	108
1894.1	5279.56	0.234838	211	224	104	0.0436436	0.965189	0.0436436	0.965189	14	15	0.982865		244	221	101	0.476998	0.633364	0.476998	0.633364	15	15	0.65287		219	246	99	-0.559954	0.575511	-0.559954	0.575511	15	15	0.594884		228	237	108	-0.186651	0.851934	-0.186651	0.851934	15	15	0.870194		229	236	109
1896.03	5274.19	0.235077	211	224	104	0.0436436	0.965189	0.0436436	0.965189	14	15	0.982865		243	222	102	0.43552	0.663186	0.43552	0.663186	15	15	0.682674		219	246	99	-0.559954	0.575511	-0.559954	0.575511	15	15	0.594884		228	237	108	-0.186651	0.851934	-0.186651	0.851934	15	15	0.870194		228	237	108
1897.95	5268.83	0.235316	212	223	103	0.0872872	0.930443	0.0872872	0.930443	14	15	0.948623		242	223	103	0.394042	0.693551	0.394042	0.693551	15	15	0.712965		219	246	99	-0.559954	0.575511	-0.559954	0.575511	15	15	0.594884		230	235	110	-0.103695	0.917411	-0.103695	0.917411	15	15	0.934887		228	237	108
1899.88	5263.48	0.235556	212	223	103	0.0872872	0.930443	0.0872872	0.930443	14	15	0.948623		243	222	102	0.43552	0.663186	0.43552	0.663186	15	15	0.682674		219	246	99	-0.559954	0.575511	-0.559954	0.575511	15	15	0.594884		230	235	110	-0.103695	0.917411	-0.103695	0.917411	15	15	0.934887		228	237	108
1901.81	5258.14	0.235795	212	223	103	0.0872872	0.930443	0.0872872	0.930443	14	15	0.948623		243	222	102	0.43552	0.663186	0.43552	0.663186	15	15	0.682674		219	246	99	-0.559954	0.575511	-0.559954	0.575511	15	15	0.594884		230	235	110	-0.103695	0.917411	-0.103695	0.917411	15	15	0.934887		230	235	110
1903.74	5252.81	0.236034	212	223	103	0.0872872	0.930443	0.0872872	0.930443	14	15	0.948623		243	222	102	0.43552	0.663186	0.43552	0.663186	15	15	0.682674		218	247	98	-0.601432	0.547553	-0.601432	0.547553	15	15	0.566774		230	235	110	-0.103695	0.917411	-0.103695	0.917411	15	15	0.934887		229	236	109
1905.67	5247.5	0.236273	211	224	104	0.0436436	0.965189	0.0436436	0.965189	14	15	0.982865		243	222	102	0.43552	0.663186	0.43552	0.663186	15	15	0.682674		219	246	99	-0.559954	0.575511	-0.559954	0.575511	15	15	0.594884		231	234	111	-0.0622171	0.95039	-0.0622171	0.95039	15	15	0.967417		229	236	109
1907.6	5242.19	0.236512	210	225	105	0	1	0	1	14	15	1.01714		245	220	100	0.518476	0.604127	0.518476	0.604127	15	15	0.623594		219	246	99	-0.559954	0.575511	-0.559954	0.575511	15	15	0.594884		231	234	111	-0.0622171	0.95039	-0.0622171	0.95039	15	15	0.967417		229	236	109
1909.53	5236.9	0.236751	210	225	105	0	1	0	1	14	15	1.01714		243	222	102	0.43552	0.663186	0.43552	0.663186	15	15	0.682674		219	246	99	-0.559954	0.575511	-0.559954	0.575511	15	15	0.594884		230	235	110	-0.103695	0.917411	-0.103695	0.917411	15	15	0.934887		229	236	109
1911.46	5231.61	0.23699	211	224	104	0.0436436	0.965189	0.0436436	0.965189	14	15	0.982865		244	221	101	0.476998	0.633364	0.476998	0.633364	15	15	0.65287		218	247	98	-0.601432	0.547553	-0.601432	0.547553	15	15	0.566774		230	235	110	-0.103695	0.917411	-0.103695	0.917411	15	15	0.934887		230	235	110
1913.39	5226.34	0.23723	211	224	104	0.0436436	0.965189	0.0436436	0.965189	14	15	0.982865		245	220	100	0.518476	0.604127	0.518476	0.604127	15	15	0.623594		218	247	98	-0.601432	0.547553	-0.601432	0.547553	15	15	0.566774		231	234	111	-0.0622171	0.95039	-0.0622171	0.95039	15	15	0.967417		231	234	111
1915.31	5221.08	0.237469	211	224	104	0.0436436	0.965189	0.0436436	0.965189	14	15	0.982865		245	220	100	0.518476	0.604127	0.518476	0.604127	15	15	0.623594		220	245	100	-0.518476	0.604127	-0.518476	0.604127	15	15	0.623594		231	234	111	-0.0622171	0.95039	-0.0622171	0.95039	15	15	0.967417		230	235	110
1917.24	5215.82	0.237708	211	224	104	0.0436436	0.965189	0.0436436	0.965189	14	15	0.982865		245	220	100	0.518476	0.604127	0.518476	0.604127	15	15	0.623594		219	246	99	-0.559954	0.575511	-0.559954	0.575511	15	15	0.594884		230	235	110	-0.103695	0.917411	-0.103695	0.917411	15	15	0.934887		230	235	110
1919.17	5210.58	0.237947	210	225	105	0	1	0	1	14	15	1.01714		244	221	101	0.476998	0.633364	0.476998	0.633364	15	15	0.65287		219	246	99	-0.559954	0.575511	-0.559954	0.575511	15	15	0.594884		229	236	109	-0.145173	0.884574	-0.145173	0.884574	15	15	0.902462		230	235	110
1921.1	5205.35	0.238186	210	225	105	0	1	0	1	14	15	1.01714		246	219	99	0.559954	0.575511	0.559954	0.575511	15	15	0.594884		220	245	100	-0.518476	0.604127	-0.518476	0.604127	15	15	0.623594		231	234	111	-0.0622171	0.95039	-0.0622171	0.95039	15	15	0.967417		230	235	110
1923.03	5200.13	0.238425	210	225	105	0	1	0	1	14	15	1.01714		244	221	101	0.476998	0.633364	0.476998	0.633364	15	15	0.65287		219	246	99	-0.559954	0.575511	-0.559954	0.575511	15	15	0.594884		232	233	112	-0.020739	0.983454	-0.020739	0.983454	15	15	1		231	234	111
1924.96	5194.92	0.238664	211	224	104	0.0436436	0.965189	0.0436436	0.965189	14	15	0.982865		245	220	100	0.518476	0.604127	0.518476	0.604127	15	15	0.623594		218	247	98	-0.601432	0.547553	-0.601432	0.547553	15	15	0.566774		232	233	112	-0.020739	0.983454	-0.020739	0.983454	15	15	1		232	233	112
1926.89	5189.72	0.238904	211	224	104	0.0436436	0.965189	0.0436436	0.965189	14	15	0.982865		245	220	100	0.518476	0.604127	0.518476	0.604127	15	15	0.623594		219	246	99	-0.559954	0.575511	-0.559954	0.575511	15	15	0.594884		232	233	112	-0.020739	0.983454	-0.020739	0.983454	15	15	1		231	234	111
1928.82	5184.53	0.239143	211	224	104	0.0436436	0.965189	0.0436436	0.965189	14	15	0.982865		245	220	100	0.518476	0.604127	0.518476	0.604127	15	15	0.623594		219	246	99	-0.559954	0.575511	-0.559954	0.575511	15	15	0.594884		232	233	112	-0.020739	0.983454	-0.020739	0.983454	15	15	1		232	233	112
1930.74	5179.35	0.239382	211	224	104	0.0436436	0.965189	0.0436436	0.965189	14	15	0.982865		245	220	100	0.518476	0.604127	0.518476	0.604127	15	15	0.623594		219	246	99	-0.559954	0.575511	-0.559954	0.575511	15	15	0.594884		232	233	112	-0.020739	0.983454	-0.020739	0.983454	15	15	1		232	233	112
1932.67	5174.18	0.239621	211	224	104	0.0436436	0.965189	0.0436436	0.965189	14	15	0.982865		247	218	98	0.601432	0.547553	0.601432	0.547553	15	15	0.566774		219	246	99	-0.559954	0.575511	-0.559954	0.575511	15	15	0.594884		233	232	112	0.020739	0.983454	0.020739	0.983454	15	15	1		231	234	111
1934.6	5169.02	0.23986	211	224	104	0.0436436	0.965189	0.0436436	0.965189	14	15	0.982865		247	218	98	0.601432	0.547553	0.601432	0.547553	15	15	0.566774		219	246	99	-0.559954	0.575511	-0.559954	0.575511	15	15	0.594884		233	232	112	0.020739	0.983454	0.020739	0.983454	15	15	1		231	234	111
1936.53	5163.87	0.240099	211	224	104	0.0436436	0.965189	0.0436436	0.965189	14	15	0.982865		247	218	98	0.601432	0.547553	0.601432	0.547553	15	15	0.566774		219	246	99	-0.559954	0.575511	-0.559954	0.575511	15	15	0.594884		233	232	112	0.020739	0.983454	0.020739	0.983454	15	15	1		231	234	111
1938.46	5158.73	0.240338	210	225	105	0	1	0	1	14	15	1.01714		246	219	99	0.559954	0.575511	0.559954	0.575511	15	15	0.594884		219	246	99	-0.559954	0.575511	-0.559954	0.575511	15	15	0.594884		233	232	112	0.020739	0.983454	0.020739	0.983454	15	15	1		231	234	111
1940.39	5153.61	0.240578	209	226	104	-0.0436436	0.965189	-0.0436436	0.965189	14	15	0.982865		246	219	99	0.559954	0.575511	0.559954	0.575511	15	15	0.594884		220	245	100	-0.518476	0.604127	-0.518476	0.604127	15	15	0.623594		233	232	112	0.020739	0.983454	0.020739	0.983454	15	15	1		232	233	112
1942.32	5148.49	0.240817	211	224	104	0.0436436	0.965189	0.0436436	0.965189	14	15	0.982865		246	219	99	0.559954	0.575511	0.559954	0.575511	15	15	0.594884		220	245	100	-0.518476	0.604127	-0.518476	0.604127	15	15	0.623594		233	232	112	0.020739	0.983454	0.020739	0.983454	15	15	1		232	233	112
1944.25	5143.38	0.241056	211	224	104	0.0436436	0.965189	0.0436436	0.965189	14	15	0.982865		246	219	99	0.559954	0.575511	0.559954	0.575511	15	15	0.594884		219	246	99	-0.559954	0.575511	-0.559954	0.575511	15	15	0.594884		233	232	112	0.020739	0.983454	0.020739	0.983454	15	15	1		232	233	112
1946.18	5138.28	0.241295	212	223	103	0.0872872	0.930443	0.0872872	0.930443	14	15	0.948623		247	218	98	0.601432	0.547553	0.601432	0.547553	15	15	0.566774		219	246	99	-0.559954	0.575511	-0.559954	0.575511	15	15	0.594884		234	231	111	0.0622171	0.95039	0.0622171	0.95039	15	15	0.967417		234	231	111
1948.1	5133.2	0.241534	212	223	103	0.0872872	0.930443	0.0872872	0.930443	14	15	0.948623		247	218	98	0.601432	0.547553	0.601432	0.547553	15	15	0.566774		219	246	99	-0.559954	0.575511	-0.559954	0.575511	15	15	0.594884		234	231	111	0.0622171	0.95039	0.0622171	0.95039	15	15	0.967417		234	231	111
1950.03	5128.12	0.241773	212	223	103	0.0872872	0.930443	0.0872872	0.930443	14	15	0.948623		247	218	98	0.601432	0.547553	0.601432	0.547553	15	15	0.566774		219	246	99	-0.559954	0.575511	-0.559954	0.575511	15	15	0.594884		234	231	111	0.0622171	0.95039	0.0622171	0.95039	15	15	0.967417		234	231	111
1951.96	5123.05	0.242012	212	223	103	0.0872872	0.930443	0.0872872	0.930443	14	15	0.948623		247	218	98	0.601432	0.547553	0.601432	0.547553	15	15	0.566774		219	246	99	-0.559954	0.575511	-0.559954	0.575511	15	15	0.594884		235	230	110	0.103695	0.917411	0.103695	0.917411	15	15	0.934887		234	231	111
1953.89	5117.99	0.242252	212	223	103	0.0872872	0.930443	0.0872872	0.930443	14	15	0.948623		247	218	98	0.601432	0.547553	0.601432	0.547553	15	15	0.566774		219	246	99	-0.559954	0.575511	-0.559954	0.575511	15	15	0.594884		235	230	110	0.103695	0.917411	0.103695	0.917411	15	15	0.934887		234	231	111
1955.82	5112.95	0.242491	213	222	102	0.130931	0.89583	0.130931	0.89583	14	15	0.914475		247	218	98	0.601432	0.547553	0.601432	0.547553	15	15	0.566774		219	246	99	-0.559954	0.575511	-0.559954	0.575511	15	15	0.594884		235	230	110	0.103695	0.917411	0.103695	0.917411	15	15	0.934887		234	231	111
1957.75	5107.91	0.24273	213	222	102	0.130931	0.89583	0.130931	0.89583	14	15	0.914475		248	217	97	0.64291	0.520283	0.64291	0.520283	15	15	0.539299		219	246	99	-0.559954	0.575511	-0.559954	0.575511	15	15	0.594884		235	230	110	0.103695	0.917411	0.103695	0.917411	15	15	0.934887		234	231	111
1959.68	5102.88	0.242969	213	222	102	0.130931	0.89583	0.130931	0.89583	14	15	0.914475		248	217	97	0.64291	0.520283	0.64291	0.520283	15	15	0.539299		219	246	99	-0.559954	0.575511	-0.559954	0.575511	15	15	0.594884		234	231	111	0.0622171	0.95039	0.0622171	0.95039	15	15	0.967417		234	231	111
1961.61	5097.86	0.243208	213	222	102	0.130931	0.89583	0.130931	0.89583	14	15	0.914475		248	217	97	0.64291	0.520283	0.64291	0.520283	15	15	0.539299		220	245	100	-0.518476	0.604127	-0.518476	0.604127	15	15	0.623594		234	231	111	0.0622171	0.95039	0.0622171	0.95039	15	15	0.967417		234	231	111
1963.53	5092.86	0.243447	213	222	102	0.130931	0.89583	0.130931	0.89583	14	15	0.914475		248	217	97	0.64291	0.520283	0.64291	0.520283	15	15	0.539299		220	245	100	-0.518476	0.604127	-0.518476	0.604127	15	15	0.623594		235	230	110	0.103695	0.917411	0.103695	0.917411	15	15	0.934887		234	231	111
1965.46	5087.86	0.243686	213	222	102	0.130931	0.89583	0.130931	0.89583	14	15	0.914475		248	217	97	0.64291	0.520283	0.64291	0.520283	15	15	0.539299		220	245	100	-0.518476	0.604127	-0.518476	0.604127	15	15	0.623594		235	230	110	0.103695	0.917411	0.103695	0.917411	15	15	0.934887		233	232	112
1967.39	5082.87	0.243926	213	222	102	0.130931	0.89583	0.130931	0.89583	14	15	0.914475		246	219	99	0.559954	0.575511	0.559954	0.575511	15	15	0.594884		220	245	100	-0.518476	0.604127	-0.518476	0.604127	15	15	0.623594		235	230	110	0.103695	0.917411	0.103695	0.917411	15	15	0.934887		234	231	111
1969.32	5077.89	0.244165	213	222	102	0.130931	0.89583	0.130931	0.89583	14	15	0.914475		247	218	98	0.601432	0.547553	0.601432	0.547553	15	15	0.566774		220	245	100	-0.518476	0.604127	-0.518476	0.604127	15	15	0.623594		235	230	110	0.103695	0.917411	0.103695	0.917411	15	15	0.934887		234	231	111
1971.25	5072.92	0.244404	213	222	102	0.130931	0.89583	0.130931	0.89583	14	15	0.914475		248	217	97	0.64291	0.520283	0.64291	0.520283	15	15	0.539299		220	245	100	-0.518476	0.604127	-0.518476	0.604127	15	15	0.623594		236	229	109	0.145173	0.884574	0.145173	0.884574	15	15	0.902462		235	230	110
1973.18	5067.96	0.244643	213	222	102	0.130931	0.89583	0.130931	0.89583	14	15	0.914475		247	218	98	0.601432	0.547553	0.601432	0.547553	15	15	0.566774		220	245	100	-0.518476	0.604127	-0.518476	0.604127	15	15	0.623594		236	229	109	0.145173	0.884574	0.145173	0.884574	15	15	0.902462		235	230	110
1975.11	5063.02	0.244882	213	222	102	0.130931	0.89583	0.130931	0.89583	14	15	0.914475		246	219	99	0.559954	0.575511	0.559954	0.575511	15	15	0.594884		220	245	100	-0.518476	0.604127	-0.518476	0.604127	15	15	0.623594		235	230	110	0.103695	0.917411	0.103695	0.917411	15	15	0.934887		235	230	110
1977.04	5058.08	0.245121	213	222	102	0.130931	0.89583	0.130931	0.89583	14	15	0.914475		249	216	96	0.684388	0.493731	0.684388	0.493731	15	15	0.512486		220	245	100	-0.518476	0.604127	-0.518476	0.604127	15	15	0.623594		236	229	109	0.145173	0.884574	0.145173	0.884574	15	15	0.902462		235	230	110
1978.97	5053.15	0.24536	213	222	102	0.130931	0.89583	0.130931	0.89583	14	15	0.914475		248	217	97	0.64291	0.520283	0.64291	0.520283	15	15	0.539299		220	245	100	-0.518476	0.604127	-0.518476	0.604127	15	15	0.623594		235	230	110	0.103695	0.917411	0.103695	0.917411	15	15	0.934887		234	231	111
1980.89	5048.23	0.2456	214	221	101	0.174574	0.861414	0.174574	0.861414	14	15	0.880478		248	217	97	0.64291	0.520283	0.64291	0.520283	15	15	0.539299		220	245	100	-0.518476	0.604127	-0.518476	0.604127	15	15	0.623594		235	230	110	0.103695	0.917411	0.103695	0.917411	15	15	0.934887		234	231	111
1982.82	5043.31	0.245839	214	221	101	0.174574	0.861414	0.174574	0.861414	14	15	0.880478		248	217	97	0.64291	0.520283	0.64291	0.520283	15	15	0.539299		221	244	101	-0.476998	0.633364	-0.476998	0.633364	15	15	0.65287		234	231	111	0.0622171	0.95039	0.0622171	0.95039	15	15	0.967417		234	231	111
1984.75	5038.41	0.246078	214	221	101	0.174574	0.861414	0.174574	0.861414	14	15	0.880478		249	216	96	0.684388	0.493731	0.684388	0.493731	15	15	0.512486		222	243	102	-0.43552	0.663186	-0.43552	0.663186	15	15	0.682674		234	231	111	0.0622171	0.95039	0.0622171	0.95039	15	15	0.967417		234	231	111
1986.68	5033.52	0.246317	212	223	103	0.0872872	0.930443	0.0872872	0.930443	14	15	0.948623		250	215	95	0.725866	0.467921	0.725866	0.467921	15	15	0.486365		222	243	102	-0.43552	0.663186	-0.43552	0.663186	15	15	0.682674		234	231	111	0.0622171	0.95039	0.0622171	0.95039	15	15	0.967417		234	231	111
1988.61	5028.64	0.246556	212	223	103	0.0872872	0.930443	0.0872872	0.930443	14	15	0.948623		250	215	95	0.725866	0.467921	0.725866	0.467921	15	15	0.486365		222	243	102	-0.43552	0.663186	-0.43552	0.663186	15	15	0.682674		234	231	111	0.0622171	0.95039	0.0622171	0.95039	15	15	0.967417		234	231	111
1990.54	5023.77	0.246795	213	222	102	0.130931	0.89583	0.130931	0.89583	14	15	0.914475		249	216	96	0.684388	0.493731	0.684388	0.493731	15	15	0.512486		222	243	102	-0.43552	0.663186	-0.43552	0.663186	15	15	0.682674		234	231	111	0.0622171	0.95039	0.0622171	0.95039	15	15	0.967417		234	231	111
1992.47	5018.9	0.247034	212	223	103	0.0872872	0.930443	0.0872872	0.930443	14	15	0.948623		248	217	97	0.64291	0.520283	0.64291	0.520283	15	15	0.539299		221	244	101	-0.476998	0.633364	-0.476998	0.633364	15	15	0.65287		236	229	109	0.145173	0.884574	0.145173	0.884574	15	15	0.902462		234	231	111
1994.4	5014.05	0.247274	212	223	103	0.0872872	0.930443	0.0872872	0.930443	14	15	0.948623		249	216	96	0.684388	0.493731	0.684388	0.493731	15	15	0.512486		222	243	102	-0.43552	0.663186	-0.43552	0.663186	15	15	0.682674		234	231	111	0.0622171	0.95039	0.0622171	0.95039	15	15	0.967417		234	231	111
1996.32	5009.21	0.247513	213	222	102	0.130931	0.89583	0.130931	0.89583	14	15	0.914475		249	216	96	0.684388	0.493731	0.684388	0.493731	15	15	0.512486		222	243	102	-0.43552	0.663186	-0.43552	0.663186	15	15	0.682674		234	231	111	0.0622171	0.95039	0.0622171	0.95039	15	15	0.967417		234	231	111
1998.25	5004.37	0.247752	212	223	103	0.0872872	0.930443	0.0872872	0.930443	14	15	0.948623		250	215	95	0.725866	0.467921	0.725866	0.467921	15	15	0.486365		222	243	102	-0.43552	0.663186	-0.43552	0.663186	15	15	0.682674		234	231	111	0.0622171	0.95039	0.0622171	0.95039	15	15	0.967417		234	231	111
2000.18	4999.54	0.247991	212	223	103	0.0872872	0.930443	0.0872872	0.930443	14	15	0.948623		249	216	96	0.684388	0.493731	0.684388	0.493731	15	15	0.512486		222	243	102	-0.43552	0.663186	-0.43552	0.663186	15	15	0.682674		234	231	111	0.0622171	0.95039	0.0622171	0.95039	15	15	0.967417		235	230	110
2002.11	4994.73	0.24823	212	223	103	0.0872872	0.930443	0.0872872	0.930443	14	15	0.948623		249	216	96	0.684388	0.493731	0.684388	0.493731	15	15	0.512486		222	243	102	-0.43552	0.663186	-0.43552	0.663186	15	15	0.682674		234	231	111	0.0622171	0.95039	0.0622171	0.95039	15	15	0.967417		234	231	111
2004.04	4989.92	0.248469	212	223	103	0.0872872	0.930443	0.0872872	0.930443	14	15	0.948623		250	215	95	0.725866	0.467921	0.725866	0.467921	15	15	0.486365		222	243	102	-0.43552	0.663186	-0.43552	0.663186	15	15	0.682674		234	231	111	0.0622171	0.95039	0.0622171	0.95039	15	15	0.967417		235	230	110
2005.97	4985.12	0.248708	212	223	103	0.0872872	0.930443	0.0872872	0.930443	14	15	0.948623		250	215	95	0.725866	0.467921	0.725866	0.467921	15	15	0.486365		222	243	102	-0.43552	0.663186	-0.43552	0.663186	15	15	0.682674		234	231	111	0.0622171	0.95039	0.0622171	0.95039	15	15	0.967417		235	230	110
2007.9	4980.33	0.248948	212	223	103	0.0872872	0.930443	0.0872872	0.930443	14	15	0.948623		250	215	95	0.725866	0.467921	0.725866	0.467921	15	15	0.486365		222	243	102	-0.43552	0.663186	-0.43552	0.663186	15	15	0.682674		234	231	111	0.0622171	0.95039	0.0622171	0.95039	15	15	0.967417		235	230	110
2009.83	4975.55	0.249187	212	223	103	0.0872872	0.930443	0.0872872	0.930443	14	15	0.948623		250	215	95	0.725866	0.467921	0.725866	0.467921	15	15	0.486365		222	243	102	-0.43552	0.663186	-0.43552	0.663186	15	15	0.682674		234	231	111	0.0622171	0.95039	0.0622171	0.95039	15	15	0.967417		235	230	110
2011.76	4970.78	0.249426	211	224	104	0.0436436	0.965189	0.0436436	0.965189	14	15	0.982865		250	215	95	0.725866	0.467921	0.725866	0.467921	15	15	0.486365		222	243	102	-0.43552	0.663186	-0.43552	0.663186	15	15	0.682674		234	231	111	0.0622171	0.95039	0.0622171	0.95039	15	15	0.967417		235	230	110
2013.68	4966.02	0.249665	213	222	102	0.130931	0.89583	0.130931	0.89583	14	15	0.914475		250	215	95	0.725866	0.467921	0.725866	0.467921	15	15	0.486365		222	243	102	-0.43552	0.663186	-0.43552	0.663186	15	15	0.682674		233	232	112	0.020739	0.983454	0.020739	0.983454	15	15	1		233	232	112
2015.61	4961.27	0.249904	212	223	103	0.0872872	0.930443	0.0872872	0.930443	14	15	0.948623		251	214	94	0.767344	0.442877	0.767344	0.442877	15	15	0.460959		222	243	102	-0.43552	0.663186	-0.43552	0.663186	15	15	0.682674		232	233	112	-0.020739	0.983454	-0.020739	0.983454	15	15	1		233	232	112
2017.54	4956.53	0.250143	212	223	103	0.0872872	0.930443	0.0872872	0.930443	14	15	0.948623		251	214	94	0.767344	0.442877	0.767344	0.442877	15	15	0.460959		222	243	102	-0.43552	0.663186	-0.43552	0.663186	15	15	0.682674		232	233	112	-0.020739	0.983454	-0.020739	0.983454	15	15	1		233	232	112
2019.47	4951.79	0.250382	213	222	102	0.130931	0.89583	0.130931	0.89583	14	15	0.914475		250	215	95	0.725866	0.467921	0.725866	0.467921	15	15	0.486365		222	243	102	-0.43552	0.663186	-0.43552	0.663186	15	15	0.682674		232	233	112	-0.020739	0.983454	-0.020739	0.983454	15	15	1		233	232	112
2021.4	4947.07	0.250622	213	222	102	0.130931	0.89583	0.130931	0.89583	14	15	0.914475		250	215	95	0.725866	0.467921	0.725866	0.467921	15	15	0.486365		222	243	102	-0.43552	0.663186	-0.43552	0.663186	15	15	0.682674		232	233	112	-0.020739	0.983454	-0.020739	0.983454	15	15	1		233	232	112
2023.33	4942.35	0.250861	213	222	102	0.130931	0.89583	0.130931	0.89583	14	15	0.914475		251	214	94	0.767344	0.442877	0.767344	0.442877	15	15	0.460959		222	243	102	-0.43552	0.663186	-0.43552	0.663186	15	15	0.682674		232	233	112	-0.020739	0.983454	-0.020739	0.983454	15	15	1		233	232	112
2025.26	4937.65	0.2511	213	222	102	0.130931	0.89583	0.130931	0.89583	14	15	0.914475		250	215	95	0.725866	0.467921	0.725866	0.467921	15	15	0.486365		222	243	102	-0.43552	0.663186	-0.43552	0.663186	15	15	0.682674		233	232	112	0.020739	0.983454	0.020739	0.983454	15	15	1		233	232	112
2027.19	4932.95	0.251339	213	222	102	0.130931	0.89583	0.130931	0.89583	14	15	0.914475		250	215	95	0.725866	0.467921	0.725866	0.467921	15	15	0.486365		222	243	102	-0.43552	0.663186	-0.43552	0.663186	15	15	0.682674		233	232	112	0.020739	0.983454	0.020739	0.983454	15	15	1		233	232	112
2029.11	4928.26	0.251578	212	223	103	0.0872872	0.930443	0.0872872	0.930443	14	15	0.948623		249	216	96	0.684388	0.493731	0.684388	0.493731	15	15	0.512486		222	243	102	-0.43552	0.663186	-0.43552	0.663186	15	15	0.682674		233	232	112	0.020739	0.983454	0.020739	0.983454	15	15	1		233	232	112
2031.04	4923.58	0.251817	211	224	104	0.0436436	0.965189	0.0436436	0.965189	14	15	0.982865		249	216	96	0.684388	0.493731	0.684388	0.493731	15	15	0.512486		222	243	102	-0.43552	0.663186	-0.43552	0.663186	15	15	0.682674		232	233	112	-0.020739	0.983454	-0.020739	0.983454	15	15	1		233	232	112
2032.97	4918.91	0.252056	212	223	103	0.0872872	0.930443	0.0872872	0.930443	14	15	0.948623		248	217	97	0.64291	0.520283	0.64291	0.520283	15	15	0.539299		222	243	102	-0.43552	0.663186	-0.43552	0.663186	15	15	0.682674		233	232	112	0.020739	0.983454	0.020739	0.983454	15	15	1		234	231	111
2034.9	4914.24	0.252296	212	223	103	0.0872872	0.930443	0.0872872	0.930443	14	15	0.948623		248	217	97	0.64291	0.520283	0.64291	0.520283	15	15	0.539299		222	243	102	-0.43552	0.663186	-0.43552	0.663186	15	15	0.682674		234	231	111	0.0622171	0.95039	0.0622171	0.95039	15	15	0.967417		234	231	111
2036.83	4909.59	0.252535	210	225	105	0	1	0	1	14	15	1.01714		247	218	98	0.601432	0.547553	0.601432	0.547553	15	15	0.566774		222	243	102	-0.43552	0.663186	-0.43552	0.663186	15	15	0.682674		233	232	112	0.020739	0.983454	0.020739	0.983454	15	15	1		234	231	111
2038.76	4904.95	0.252774	209	226	104	-0.0436436	0.965189	-0.0436436	0.965189	14	15	0.982865		248	217	97	0.64291	0.520283	0.64291	0.520283	15	15	0.539299		222	243	102	-0.43552	0.663186	-0.43552	0.663186	15	15	0.682674		231	234	111	-0.0622171	0.95039	-0.0622171	0.95039	15	15	0.967417		234	231	111
2040.69	4900.31	0.253013	209	226	104	-0.0436436	0.965189	-0.0436436	0.965189	14	15	0.982865		248	217	97	0.64291	0.520283	0.64291	0.520283	15	15	0.539299		222	243	102	-0.43552	0.663186	-0.43552	0.663186	15	15	0.682674		230	235	110	-0.103695	0.917411	-0.103695	0.917411	15	15	0.934887		234	231	111
2042.62	4895.68	0.253252	208	227	103	-0.0872872	0.930443	-0.0872872	0.930443	14	15	0.948623		248	217	97	0.64291	0.520283	0.64291	0.520283	15	15	0.539299		222	243	102	-0.43552	0.663186	-0.43552	0.663186	15	15	0.682674		230	235	110	-0.103695	0.917411	-0.103695	0.917411	15	15	0.934887		234	231	111
2044.54	4891.06	0.253491	209	226	104	-0.0436436	0.965189	-0.0436436	0.965189	14	15	0.982865		248	217	97	0.64291	0.520283	0.64291	0.520283	15	15	0.539299		222	243	102	-0.43552	0.663186	-0.43552	0.663186	15	15	0.682674		230	235	110	-0.103695	0.917411	-0.103695	0.917411	15	15	0.934887		234	231	111
2046.47	4886.45	0.25373	209	226	104	-0.0436436	0.965189	-0.0436436	0.965189	14	15	0.982865		248	217	97	0.64291	0.520283	0.64291	0.520283	15	15	0.539299		222	243	102	-0.43552	0.663186	-0.43552	0.663186	15	15	0.682674		230	235	110	-0.103695	0.917411	-0.103695	0.917411	15	15	0.934887		234	231	111
2048.4	4881.85	0.25397	209	226	104	-0.0436436	0.965189	-0.0436436	0.965189	14	15	0.982865		247	218	98	0.601432	0.547553	0.601432	0.547553	15	15	0.566774		223	242	103	-0.394042	0.693551	-0.394042	0.693551	15	15	0.712965		230	235	110	-0.103695	0.917411	-0.103695	0.917411	15	15	0.934887		234	231	111
2050.33	4877.26	0.254209	208	227	103	-0.0872872	0.930443	-0.0872872	0.930443	14	15	0.948623		247	218	98	0.601432	0.547553	0.601432	0.547553	15	15	0.566774		224	241	104	-0.352564	0.724416	-0.352564	0.724416	15	15	0.743702		230	235	110	-0.103695	0.917411	-0.103695	0.917411	15	15	0.934887		234	231	111
2052.26	4872.68	0.254448	208	227	103	-0.0872872	0.930443	-0.0872872	0.930443	14	15	0.948623		247	218	98	0.601432	0.547553	0.601432	0.547553	15	15	0.566774		223	242	103	-0.394042	0.693551	-0.394042	0.693551	15	15	0.712965		229	236	109	-0.145173	0.884574	-0.145173	0.884574	15	15	0.902462		235	230	110
2054.19	4868.1	0.254687	207	228	102	-0.130931	0.89583	-0.130931	0.89583	14	15	0.914475		247	218	98	0.601432	0.547553	0.601432	0.547553	15	15	0.566774		223	242	103	-0.394042	0.693551	-0.394042	0.693551	15	15	0.712965		228	237	108	-0.186651	0.851934	-0.186651	0.851934	15	15	0.870194		236	229	109
2056.12	4863.53	0.254926	207	228	102	-0.130931	0.89583	-0.130931	0.89583	14	15	0.914475		247	218	98	0.601432	0.547553	0.601432	0.547553	15	15	0.566774		223	242	103	-0.394042	0.693551	-0.394042	0.693551	15	15	0.712965		229	236	109	-0.145173	0.884574	-0.145173	0.884574	15	15	0.902462		236	229	109
2058.05	4858.98	0.255165	207	228	102	-0.130931	0.89583	-0.130931	0.89583	14	15	0.914475		247	218	98	0.601432	0.547553	0.601432	0.547553	15	15	0.566774		223	242	103	-0.394042	0.693551	-0.394042	0.693551	15	15	0.712965		229	236	109	-0.145173	0.884574	-0.145173	0.884574	15	15	0.902462		235	230	110
2059.98	4854.43	0.255404	207	228	102	-0.130931	0.89583	-0.130931	0.89583	14	15	0.914475		247	218	98	0.601432	0.547553	0.601432	0.547553	15	15	0.566774		223	242	103	-0.394042	0.693551	-0.394042	0.693551	15	15	0.712965		228	237	108	-0.186651	0.851934	-0.186651	0.851934	15	15	0.870194		234	231	111
2061.9	4849.89	0.255644	205	230	100	-0.218218	0.827259	-0.218218	0.827259	14	15	0.846694		246	219	99	0.559954	0.575511	0.559954	0.575511	15	15	0.594884		223	242	103	-0.394042	0.693551	-0.394042	0.693551	15	15	0.712965		228	237	108	-0.186651	0.851934	-0.186651	0.851934	15	15	0.870194		235	230	110
2063.83	4845.35	0.255883	205	230	100	-0.218218	0.827259	-0.218218	0.827259	14	15	0.846694		247	218	98	0.601432	0.547553	0.601432	0.547553	15	15	0.566774		223	242	103	-0.394042	0.693551	-0.394042	0.693551	15	15	0.712965		227	238	107	-0.228129	0.819546	-0.228129	0.819546	15	15	0.838135		234	231	111
2065.76	4840.83	0.256122	205	230	100	-0.218218	0.827259	-0.218218	0.827259	14	15	0.846694		247	218	98	0.601432	0.547553	0.601432	0.547553	15	15	0.566774		223	242	103	-0.394042	0.693551	-0.394042	0.693551	15	15	0.712965		227	238	107	-0.228129	0.819546	-0.228129	0.819546	15	15	0.838135		234	231	111
2067.69	4836.31	0.256361	205	230	100	-0.218218	0.827259	-0.218218	0.827259	14	15	0.846694		246	219	99	0.559954	0.575511	0.559954	0.575511	15	15	0.594884		223	242	103	-0.394042	0.693551	-0.394042	0.693551	15	15	0.712965		227	238	107	-0.228129	0.819546	-0.228129	0.819546	15	15	0.838135		235	230	110
2069.62	4831.81	0.2566	205	230	100	-0.218218	0.827259	-0.218218	0.827259	14	15	0.846694		246	219	99	0.559954	0.575511	0.559954	0.575511	15	15	0.594884		224	241	104	-0.352564	0.724416	-0.352564	0.724416	15	15	0.743702		227	238	107	-0.228129	0.819546	-0.228129	0.819546	15	15	0.838135		234	231	111
2071.55	4827.31	0.256839	204	231	99	-0.261861	0.793428	-0.261861	0.793428	14	15	0.813179		246	219	99	0.559954	0.575511	0.559954	0.575511	15	15	0.594884		224	241	104	-0.352564	0.724416	-0.352564	0.724416	15	15	0.743702		227	238	107	-0.228129	0.819546	-0.228129	0.819546	15	15	0.838135		234	231	111
2073.48	4822.82	0.257078	203	232	98	-0.305505	0.759982	-0.305505	0.759982	14	15	0.779995		247	218	98	0.601432	0.547553	0.601432	0.547553	15	15	0.566774		225	240	105	-0.311086	0.755736	-0.311086	0.755736	15	15	0.77484		227	238	107	-0.228129	0.819546	-0.228129	0.819546	15	15	0.838135		235	230	110
2075.41	4818.33	0.257318	204	231	99	-0.261861	0.793428	-0.261861	0.793428	14	15	0.813179		247	218	98	0.601432	0.547553	0.601432	0.547553	15	15	0.566774		224	241	104	-0.352564	0.724416	-0.352564	0.724416	15	15	0.743702		226	239	106	-0.269607	0.787462	-0.269607	0.787462	15	15	0.806334		235	230	110
2077.33	4813.86	0.257557	202	233	97	-0.349149	0.726978	-0.349149	0.726978	14	15	0.747192		247	218	98	0.601432	0.547553	0.601432	0.547553	15	15	0.566774		224	241	104	-0.352564	0.724416	-0.352564	0.724416	15	15	0.743702		226	239	106	-0.269607	0.787462	-0.269607	0.787462	15	15	0.806334		234	231	111
2079.26	4809.39	0.257796	202	233	97	-0.349149	0.726978	-0.349149	0.726978	14	15	0.747192		246	219	99	0.559954	0.575511	0.559954	0.575511	15	15	0.594884		224	241	104	-0.352564	0.724416	-0.352564	0.724416	15	15	0.743702		225	240	105	-0.311086	0.755736	-0.311086	0.755736	15	15	0.77484		234	231	111
2081.19	4804.94	0.258035	203	232	98	-0.305505	0.759982	-0.305505	0.759982	14	15	0.779995		245	220	100	0.518476	0.604127	0.518476	0.604127	15	15	0.623594		224	241	104	-0.352564	0.724416	-0.352564	0.724416	15	15	0.743702		224	241	104	-0.352564	0.724416	-0.352564	0.724416	15	15	0.743702		235	230	110
2083.12	4800.49	0.258274	203	232	98	-0.305505	0.759982	-0.305505	0.759982	14	15	0.779995		246	219	99	0.559954	0.575511	0.559954	0.575511	15	15	0.594884		225	240	105	-0.311086	0.755736	-0.311086	0.755736	15	15	0.77484		225	240	105	-0.311086	0.755736	-0.311086	0.755736	15	15	0.77484		236	229	109
2085.05	4796.05	0.258513	203	232	98	-0.305505	0.759982	-0.305505	0.759982	14	15	0.779995		245	220	100	0.518476	0.604127	0.518476	0.604127	15	15	0.623594		224	241	104	-0.352564	0.724416	-0.352564	0.724416	15	15	0.743702		225	240	105	-0.311086	0.755736	-0.311086	0.755736	15	15	0.77484		235	230	110
2086.98	4791.62	0.258752	203	232	98	-0.305505	0.759982	-0.305505	0.759982	14	15	0.779995		245	220	100	0.518476	0.604127	0.518476	0.604127	15	15	0.623594		224	241	104	-0.352564	0.724416	-0.352564	0.724416	15	15	0.743702		225	240	105	-0.311086	0.755736	-0.311086	0.755736	15	15	0.77484		234	231	111
2088.91	4787.19	0.258992	203	232	98	-0.305505	0.759982	-0.305505	0.759982	14	15	0.779995		247	218	98	0.601432	0.547553	0.601432	0.547553	15	15	0.566774		226	239	106	-0.269607	0.787462	-0.269607	0.787462	15	15	0.806334		225	240	105	-0.311086	0.755736	-0.311086	0.755736	15	15	0.77484		234	231	111
2090.84	4782.77	0.259231	203	232	98	-0.305505	0.759982	-0.305505	0.759982	14	15	0.779995		248	217	97	0.64291	0.520283	0.64291	0.520283	15	15	0.539299		226	239	106	-0.269607	0.787462	-0.269607	0.787462	15	15	0.806334		224	241	104	-0.352564	0.724416	-0.352564	0.724416	15	15	0.743702		233	232	112
2092.77	4778.37	0.25947	203	232	98	-0.305505	0.759982	-0.305505	0.759982	14	15	0.779995		246	219	99	0.559954	0.575511	0.559954	0.575511	15	15	0.594884		226	239	106	-0.269607	0.787462	-0.269607	0.787462	15	15	0.806334		222	243	102	-0.43552	0.663186	-0.43552	0.663186	15	15	0.682674		233	232	112
2094.69	4773.97	0.259709	203	232	98	-0.305505	0.759982	-0.305505	0.759982	14	15	0.779995		246	219	99	0.559954	0.575511	0.559954	0.575511	15	15	0.594884		226	239	106	-0.269607	0.787462	-0.269607	0.787462	15	15	0.806334		223	242	103	-0.394042	0.693551	-0.394042	0.693551	15	15	0.712965		233	232	112
2096.62	4769.57	0.259948	203	232	98	-0.305505	0.759982	-0.305505	0.759982	14	15	0.779995		246	219	99	0.559954	0.575511	0.559954	0.575511	15	15	0.594884		226	239	106	-0.269607	0.787462	-0.269607	0.787462	15	15	0.806334		223	242	103	-0.394042	0.693551	-0.394042	0.693551	15	15	0.712965		233	232	112
2098.55	4765.19	0.260187	203	232	98	-0.305505	0.759982	-0.305505	0.759982	14	15	0.779995		246	219	99	0.559954	0.575511	0.559954	0.575511	15	15	0.594884		226	239	106	-0.269607	0.787462	-0.269607	0.787462	15	15	0.806334		222	243	102	-0.43552	0.663186	-0.43552	0.663186	15	15	0.682674		233	232	112
2100.48	4760.82	0.260426	203	232	98	-0.305505	0.759982	-0.305505	0.759982	14	15	0.779995		247	218	98	0.601432	0.547553	0.601432	0.547553	15	15	0.566774		227	238	107	-0.228129	0.819546	-0.228129	0.819546	15	15	0.838135		222	243	102	-0.43552	0.663186	-0.43552	0.663186	15	15	0.682674		233	232	112
2102.41	4756.45	0.260666	202	233	97	-0.349149	0.726978	-0.349149	0.726978	14	15	0.747192		248	217	97	0.64291	0.520283	0.64291	0.520283	15	15	0.539299		227	238	107	-0.228129	0.819546	-0.228129	0.819546	15	15	0.838135		221	244	101	-0.476998	0.633364	-0.476998	0.633364	15	15	0.65287		232	233	112
2104.34	4752.09	0.260905	202	233	97	-0.349149	0.726978	-0.349149	0.726978	14	15	0.747192		247	218	98	0.601432	0.547553	0.601432	0.547553	15	15	0.566774		227	238	107	-0.228129	0.819546	-0.228129	0.819546	15	15	0.838135		221	244	101	-0.476998	0.633364	-0.476998	0.633364	15	15	0.65287		231	234	111
2106.27	4747.74	0.261144	202	233	97	-0.349149	0.726978	-0.349149	0.726978	14	15	0.747192		248	217	97	0.64291	0.520283	0.64291	0.520283	15	15	0.539299		226	239	106	-0.269607	0.787462	-0.269607	0.787462	15	15	0.806334		220	245	100	-0.518476	0.604127	-0.518476	0.604127	15	15	0.623594		229	236	109
2108.2	4743.39	0.261383	201	234	96	-0.392792	0.694473	-0.392792	0.694473	14	15	0.71483		247	218	98	0.601432	0.547553	0.601432	0.547553	15	15	0.566774		226	239	106	-0.269607	0.787462	-0.269607	0.787462	15	15	0.806334		219	246	99	-0.559954	0.575511	-0.559954	0.575511	15	15	0.594884		227	238	107
2110.12	4739.06	0.261622	201	234	96	-0.392792	0.694473	-0.392792	0.694473	14	15	0.71483		248	217	97	0.64291	0.520283	0.64291	0.520283	15	15	0.539299		227	238	107	-0.228129	0.819546	-0.228129	0.819546	15	15	0.838135		220	245	100	-0.518476	0.604127	-0.518476	0.604127	15	15	0.623594		227	238	107
2112.05	4734.73	0.261861	201	234	96	-0.392792	0.694473	-0.392792	0.694473	14	15	0.71483		248	217	97	0.64291	0.520283	0.64291	0.520283	15	15	0.539299		227	238	107	-0.228129	0.819546	-0.228129	0.819546	15	15	0.838135		220	245	100	-0.518476	0.604127	-0.518476	0.604127	15	15	0.623594		227	238	107
2113.98	4730.41	0.2621	201	234	96	-0.392792	0.694473	-0.392792	0.694473	14	15	0.71483		247	218	98	0.601432	0.547553	0.601432	0.547553	15	15	0.566774		227	238	107	-0.228129	0.819546	-0.228129	0.819546	15	15	0.838135		220	245	100	-0.518476	0.604127	-0.518476	0.604127	15	15	0.623594		226	239	106
2115.91	4726.1	0.26234	201	234	96	-0.392792	0.694473	-0.392792	0.694473	14	15	0.71483		247	218	98	0.601432	0.547553	0.601432	0.547553	15	15	0.566774		227	238	107	-0.228129	0.819546	-0.228129	0.819546	15	15	0.838135		219	246	99	-0.559954	0.575511	-0.559954	0.575511	15	15	0.594884		226	239	106
2117.84	4721.79	0.262579	201	234	96	-0.392792	0.694473	-0.392792	0.694473	14	15	0.71483		247	218	98	0.601432	0.547553	0.601432	0.547553	15	15	0.566774		225	240	105	-0.311086	0.755736	-0.311086	0.755736	15	15	0.77484		219	246	99	-0.559954	0.575511	-0.559954	0.575511	15	15	0.594884		224	241	104
2119.77	4717.5	0.262818	201	234	96	-0.392792	0.694473	-0.392792	0.694473	14	15	0.71483		247	218	98	0.601432	0.547553	0.601432	0.547553	15	15	0.566774		225	240	105	-0.311086	0.755736	-0.311086	0.755736	15	15	0.77484		217	248	97	-0.64291	0.520283	-0.64291	0.520283	15	15	0.539299		224	241	104
2121.7	4713.21	0.263057	201	234	96	-0.392792	0.694473	-0.392792	0.694473	14	15	0.71483		247	218	98	0.601432	0.547553	0.601432	0.547553	15	15	0.566774		227	238	107	-0.228129	0.819546	-0.228129	0.819546	15	15	0.838135		218	247	98	-0.601432	0.547553	-0.601432	0.547553	15	15	0.566774		224	241	104
2123.63	4708.93	0.263296	202	233	97	-0.349149	0.726978	-0.349149	0.726978	14	15	0.747192		247	218	98	0.601432	0.547553	0.601432	0.547553	15	15	0.566774		227	238	107	-0.228129	0.819546	-0.228129	0.819546	15	15	0.838135		218	247	98	-0.601432	0.547553	-0.601432	0.547553	15	15	0.566774		224	241	104
2125.56	4704.65	0.263535	202	233	97	-0.349149	0.726978	-0.349149	0.726978	14	15	0.747192		247	218	98	0.601432	0.547553	0.601432	0.547553	15	15	0.566774		227	238	107	-0.228129	0.819546	-0.228129	0.819546	15	15	0.838135		218	247	98	-0.601432	0.547553	-0.601432	0.547553	15	15	0.566774		222	243	102
2127.48	4700.39	0.263774	202	233	97	-0.349149	0.726978	-0.349149	0.726978	14	15	0.747192		246	219	99	0.559954	0.575511	0.559954	0.575511	15	15	0.594884		227	238	107	-0.228129	0.819546	-0.228129	0.819546	15	15	0.838135		218	247	98	-0.601432	0.547553	-0.601432	0.547553	15	15	0.566774		221	244	101
2129.41	4696.13	0.264014	203	232	98	-0.305505	0.759982	-0.305505	0.759982	14	15	0.779995		246	219	99	0.559954	0.575511	0.559954	0.575511	15	15	0.594884		228	237	108	-0.186651	0.851934	-0.186651	0.851934	15	15	0.870194		218	247	98	-0.601432	0.547553	-0.601432	0.547553	15	15	0.566774		222	243	102
2131.34	4691.88	0.264253	203	232	98	-0.305505	0.759982	-0.305505	0.759982	14	15	0.779995		246	219	99	0.559954	0.575511	0.559954	0.575511	15	15	0.594884		228	237	108	-0.186651	0.851934	-0.186651	0.851934	15	15	0.870194		218	247	98	-0.601432	0.547553	-0.601432	0.547553	15	15	0.566774		221	244	101
2133.27	4687.64	0.264492	203	232	98	-0.305505	0.759982	-0.305505	0.759982	14	15	0.779995		246	219	99	0.559954	0.575511	0.559954	0.575511	15	15	0.594884		229	236	109	-0.145173	0.884574	-0.145173	0.884574	15	15	0.902462		218	247	98	-0.601432	0.547553	-0.601432	0.547553	15	15	0.566774		220	245	100
2135.2	4683.4	0.264731	203	232	98	-0.305505	0.759982	-0.305505	0.759982	14	15	0.779995		246	219	99	0.559954	0.575511	0.559954	0.575511	15	15	0.594884		228	237	108	-0.186651	0.851934	-0.186651	0.851934	15	15	0.870194		217	248	97	-0.64291	0.520283	-0.64291	0.520283	15	15	0.539299		219	246	99
2137.13	4679.18	0.26497	203	232	98	-0.305505	0.759982	-0.305505	0.759982	14	15	0.779995		246	219	99	0.559954	0.575511	0.559954	0.575511	15	15	0.594884		228	237	108	-0.186651	0.851934	-0.186651	0.851934	15	15	0.870194		217	248	97	-0.64291	0.520283	-0.64291	0.520283	15	15	0.539299		219	246	99
2139.06	4674.96	0.265209	203	232	98	-0.305505	0.759982	-0.305505	0.759982	14	15	0.779995		246	219	99	0.559954	0.575511	0.559954	0.575511	15	15	0.594884		229	236	109	-0.145173	0.884574	-0.145173	0.884574	15	15	0.902462		217	248	97	-0.64291	0.520283	-0.64291	0.520283	15	15	0.539299		218	247	98
2140.99	4670.75	0.265448	203	232	98	-0.305505	0.759982	-0.305505	0.759982	14	15	0.779995		247	218	98	0.601432	0.547553	0.601432	0.547553	15	15	0.566774		229	236	109	-0.145173	0.884574	-0.145173	0.884574	15	15	0.902462		217	248	97	-0.64291	0.520283	-0.64291	0.520283	15	15	0.539299		218	247	98
2142.91	4666.54	0.265688	202	233	97	-0.349149	0.726978	-0.349149	0.726978	14	15	0.747192		248	217	97	0.64291	0.520283	0.64291	0.520283	15	15	0.539299		228	237	108	-0.186651	0.851934	-0.186651	0.851934	15	15	0.870194		217	248	97	-0.64291	0.520283	-0.64291	0.520283	15	15	0.539299		219	246	99
2144.84	4662.35	0.265927	203	232	98	-0.305505	0.759982	-0.305505	0.759982	14	15	0.779995		248	217	97	0.64291	0.520283	0.64291	0.520283	15	15	0.539299		229	236	109	-0.145173	0.884574	-0.145173	0.884574	15	15	0.902462		217	248	97	-0.64291	0.520283	-0.64291	0.520283	15	15	0.539299		218	247	98
2146.77	4658.16	0.266166	203	232	98	-0.305505	0.759982	-0.305505	0.759982	14	15	0.779995		248	217	97	0.64291	0.520283	0.64291	0.520283	15	15	0.539299		229	236	109	-0.145173	0.884574	-0.145173	0.884574	15	15	0.902462		217	248	97	-0.64291	0.520283	-0.64291	0.520283	15	15	0.539299		217	248	97
2148.7	4653.97	0.266405	203	232	98	-0.305505	0.759982	-0.305505	0.759982	14	15	0.779995		248	217	97	0.64291	0.520283	0.64291	0.520283	15	15	0.539299		229	236	109	-0.145173	0.884574	-0.145173	0.884574	15	15	0.902462		217	248	97	-0.64291	0.520283	-0.64291	0.520283	15	15	0.539299		217	248	97
2150.63	4649.8	0.266644	203	232	98	-0.305505	0.759982	-0.305505	0.759982	14	15	0.779995		248	217	97	0.64291	0.520283	0.64291	0.520283	15	15	0.539299		228	237	108	-0.186651	0.851934	-0.186651	0.851934	15	15	0.870194		217	248	97	-0.64291	0.520283	-0.64291	0.520283	15	15	0.539299		217	248	97
2152.56	4645.63	0.266883	203	232	98	-0.305505	0.759982	-0.305505	0.759982	14	15	0.779995		248	217	97	0.64291	0.520283	0.64291	0.520283	15	15	0.539299		228	237	108	-0.186651	0.851934	-0.186651	0.851934	15	15	0.870194		217	248	97	-0.64291	0.520283	-0.64291	0.520283	15	15	0.539299		216	249	96
2154.49	4641.48	0.267122	203	232	98	-0.305505	0.759982	-0.305505	0.759982	14	15	0.779995		248	217	97	0.64291	0.520283	0.64291	0.520283	15	15	0.539299		229	236	109	-0.145173	0.884574	-0.145173	0.884574	15	15	0.902462		217	248	97	-0.64291	0.520283	-0.64291	0.520283	15	15	0.539299		216	249	96
2156.42	4637.32	0.267362	202	233	97	-0.349149	0.726978	-0.349149	0.726978	14	15	0.747192		248	217	97	0.64291	0.520283	0.64291	0.520283	15	15	0.539299		229	236	109	-0.145173	0.884574	-0.145173	0.884574	15	15	0.902462		217	248	97	-0.64291	0.520283	-0.64291	0.520283	15	15	0.539299		216	249	96
2158.35	4633.18	0.267601	202	233	97	-0.349149	0.726978	-0.349149	0.726978	14	15	0.747192		248	217	97	0.64291	0.520283	0.64291	0.520283	15	15	0.539299		229	236	109	-0.145173	0.884574	-0.145173	0.884574	15	15	0.902462		217	248	97	-0.64291	0.520283	-0.64291	0.520283	15	15	0.539299		216	249	96
2160.27	4629.04	0.26784	202	233	97	-0.349149	0.726978	-0.349149	0.726978	14	15	0.747192		248	217	97	0.64291	0.520283	0.64291	0.520283	15	15	0.539299		229	236	109	-0.145173	0.884574	-0.145173	0.884574	15	15	0.902462		217	248	97	-0.64291	0.520283	-0.64291	0.520283	15	15	0.539299		216	249	96
2162.2	4624.91	0.268079	202	233	97	-0.349149	0.726978	-0.349149	0.726978	14	15	0.747192		248	217	97	0.64291	0.520283	0.64291	0.520283	15	15	0.539299		229	236	109	-0.145173	0.884574	-0.145173	0.884574	15	15	0.902462		217	248	97	-0.64291	0.520283	-0.64291	0.520283	15	15	0.539299		216	249	96
2164.13	4620.79	0.268318	202	233	97	-0.349149	0.726978	-0.349149	0.726978	14	15	0.747192		247	218	98	0.601432	0.547553	0.601432	0.547553	15	15	0.566774		229	236	109	-0.145173	0.884574	-0.145173	0.884574	15	15	0.902462		217	248	97	-0.64291	0.520283	-0.64291	0.520283	15	15	0.539299		216	249	96
2166.06	4616.68	0.268557	202	233	97	-0.349149	0.726978	-0.349149	0.726978	14	15	0.747192		247	218	98	0.601432	0.547553	0.601432	0.547553	15	15	0.566774		229	236	109	-0.145173	0.884574	-0.145173	0.884574	15	15	0.902462		216	249	96	-0.684388	0.493731	-0.684388	0.493731	15	15	0.512486		216	249	96
2167.99	4612.57	0.268796	202	233	97	-0.349149	0.726978	-0.349149	0.726978	14	15	0.747192		247	218	98	0.601432	0.547553	0.601432	0.547553	15	15	0.566774		229	236	109	-0.145173	0.884574	-0.145173	0.884574	15	15	0.902462		216	249	96	-0.684388	0.493731	-0.684388	0.493731	15	15	0.512486		216	249	96
2169.92	4608.47	0.269036	202	233	97	-0.349149	0.726978	-0.349149	0.726978	14	15	0.747192		247	218	98	0.601432	0.547553	0.601432	0.547553	15	15	0.566774		230	235	110	-0.103695	0.917411	-0.103695	0.917411	15	15	0.934887		216	249	96	-0.684388	0.493731	-0.684388	0.493731	15	15	0.512486		215	250	95
2171.85	4604.38	0.269275	203	232	98	-0.305505	0.759982	-0.305505	0.759982	14	15	0.779995		247	218	98	0.601432	0.547553	0.601432	0.547553	15	15	0.566774		229	236	109	-0.145173	0.884574	-0.145173	0.884574	15	15	0.902462		216	249	96	-0.684388	0.493731	-0.684388	0.493731	15	15	0.512486		215	250	95
2173.78	4600.29	0.269514	203	232	98	-0.305505	0.759982	-0.305505	0.759982	14	15	0.779995		247	218	98	0.601432	0.547553	0.601432	0.547553	15	15	0.566774		229	236	109	-0.145173	0.884574	-0.145173	0.884574	15	15	0.902462		216	249	96	-0.684388	0.493731	-0.684388	0.493731	15	15	0.512486		215	250	95
2175.7	4596.21	0.269753	203	232	98	-0.305505	0.759982	-0.305505	0.759982	14	15	0.779995		247	218	98	0.601432	0.547553	0.601432	0.547553	15	15	0.566774		229	236	109	-0.145173	0.884574	-0.145173	0.884574	15	15	0.902462		216	249	96	-0.684388	0.493731	-0.684388	0.493731	15	15	0.512486		215	250	95
2177.63	4592.14	0.269992	203	232	98	-0.305505	0.759982	-0.305505	0.759982	14	15	0.779995		247	218	98	0.601432	0.547553	0.601432	0.547553	15	15	0.566774		229	236	109	-0.145173	0.884574	-0.145173	0.884574	15	15	0.902462		216	249	96	-0.684388	0.493731	-0.684388	0.493731	15	15	0.512486		215	250	95
2179.56	4588.08	0.270231	203	232	98	-0.305505	0.759982	-0.305505	0.759982	14	15	0.779995		246	219	99	0.559954	0.575511	0.559954	0.575511	15	15	0.594884		229	236	109	-0.145173	0.884574	-0.145173	0.884574	15	15	0.902462		216	249	96	-0.684388	0.493731	-0.684388	0.493731	15	15	0.512486		215	250	95
2181.49	4584.02	0.27047	202	233	97	-0.349149	0.726978	-0.349149	0.726978	14	15	0.747192		246	219	99	0.559954	0.575511	0.559954	0.575511	15	15	0.594884		229	236	109	-0.145173	0.884574	-0.145173	0.884574	15	15	0.902462		216	249	96	-0.684388	0.493731	-0.684388	0.493731	15	15	0.512486		215	250	95
2183.42	4579.97	0.27071	203	232	98	-0.305505	0.759982	-0.305505	0.759982	14	15	0.779995		246	219	99	0.559954	0.575511	0.559954	0.575511	15	15	0.594884		229	236	109	-0.145173	0.884574	-0.145173	0.884574	15	15	0.902462		216	249	96	-0.684388	0.493731	-0.684388	0.493731	15	15	0.512486		215	250	95
2185.35	4575.93	0.270949	202	233	97	-0.349149	0.726978	-0.349149	0.726978	14	15	0.747192		246	219	99	0.559954	0.575511	0.559954	0.575511	15	15	0.594884		229	236	109	-0.145173	0.884574	-0.145173	0.884574	15	15	0.902462		216	249	96	-0.684388	0.493731	-0.684388	0.493731	15	15	0.512486		215	250	95
2187.28	4571.89	0.271188	202	233	97	-0.349149	0.726978	-0.349149	0.726978	14	15	0.747192		246	219	99	0.559954	0.575511	0.559954	0.575511	15	15	0.594884		229	236	109	-0.145173	0.884574	-0.145173	0.884574	15	15	0.902462		216	249	96	-0.684388	0.493731	-0.684388	0.493731	15	15	0.512486		215	250	95
2189.21	4567.87	0.271427	201	234	96	-0.392792	0.694473	-0.392792	0.694473	14	15	0.71483		246	219	99	0.559954	0.575511	0.559954	0.575511	15	15	0.594884		229	236	109	-0.145173	0.884574	-0.145173	0.884574	15	15	0.902462		215	250	95	-0.725866	0.467921	-0.725866	0.467921	15	15	0.486365		215	250	95
2191.13	4563.84	0.271666	201	234	96	-0.392792	0.694473	-0.392792	0.694473	14	15	0.71483		246	219	99	0.559954	0.575511	0.559954	0.575511	15	15	0.594884		229	236	109	-0.145173	0.884574	-0.145173	0.884574	15	15	0.902462		216	249	96	-0.684388	0.493731	-0.684388	0.493731	15	15	0.512486		215	250	95
2193.06	4559.83	0.271905	201	234	96	-0.392792	0.694473	-0.392792	0.694473	14	15	0.71483		246	219	99	0.559954	0.575511	0.559954	0.575511	15	15	0.594884		230	235	110	-0.103695	0.917411	-0.103695	0.917411	15	15	0.934887		215	250	95	-0.725866	0.467921	-0.725866	0.467921	15	15	0.486365		215	250	95
2194.99	4555.82	0.272144	201	234	96	-0.392792	0.694473	-0.392792	0.694473	14	15	0.71483		246	219	99	0.559954	0.575511	0.559954	0.575511	15	15	0.594884		229	236	109	-0.145173	0.884574	-0.145173	0.884574	15	15	0.902462		215	250	95	-0.725866	0.467921	-0.725866	0.467921	15	15	0.486365		215	250	95
2196.92	4551.82	0.272384	202	233	97	-0.349149	0.726978	-0.349149	0.726978	14	15	0.747192		246	219	99	0.559954	0.575511	0.559954	0.575511	15	15	0.594884		229	236	109	-0.145173	0.884574	-0.145173	0.884574	15	15	0.902462		215	250	95	-0.725866	0.467921	-0.725866	0.467921	15	15	0.486365		215	250	95
2198.85	4547.83	0.272623	203	232	98	-0.305505	0.759982	-0.305505	0.759982	14	15	0.779995		246	219	99	0.559954	0.575511	0.559954	0.575511	15	15	0.594884		230	235	110	-0.103695	0.917411	-0.103695	0.917411	15	15	0.934887		215	250	95	-0.725866	0.467921	-0.725866	0.467921	15	15	0.486365		215	250	95
2200.78	4543.85	0.272862	203	232	98	-0.305505	0.759982	-0.305505	0.759982	14	15	0.779995		246	219	99	0.559954	0.575511	0.559954	0.575511	15	15	0.594884		230	235	110	-0.103695	0.917411	-0.103695	0.917411	15	15	0.934887		215	250	95	-0.725866	0.467921	-0.725866	0.467921	15	15	0.486365		216	249	96
2202.71	4539.87	0.273101	203	232	98	-0.305505	0.759982	-0.305505	0.759982	14	15	0.779995		246	219	99	0.559954	0.575511	0.559954	0.575511	15	15	0.594884		230	235	110	-0.103695	0.917411	-0.103695	0.917411	15	15	0.934887		215	250	95	-0.725866	0.467921	-0.725866	0.467921	15	15	0.486365		216	249	96
2204.64	4535.89	0.27334	203	232	98	-0.305505	0.759982	-0.305505	0.759982	14	15	0.779995		246	219	99	0.559954	0.575511	0.559954	0.575511	15	15	0.594884		230	235	110	-0.103695	0.917411	-0.103695	0.917411	15	15	0.934887		215	250	95	-0.725866	0.467921	-0.725866	0.467921	15	15	0.486365		215	250	95
2206.57	4531.93	0.273579	202	233	97	-0.349149	0.726978	-0.349149	0.726978	14	15	0.747192		246	219	99	0.559954	0.575511	0.559954	0.575511	15	15	0.594884		229	236	109	-0.145173	0.884574	-0.145173	0.884574	15	15	0.902462		214	251	94	-0.767344	0.442877	-0.767344	0.442877	15	15	0.460959		214	251	94
2208.49	4527.97	0.273818	202	233	97	-0.349149	0.726978	-0.349149	0.726978	14	15	0.747192		245	220	100	0.518476	0.604127	0.518476	0.604127	15	15	0.623594		230	235	110	-0.103695	0.917411	-0.103695	0.917411	15	15	0.934887		213	252	93	-0.808822	0.418618	-0.808822	0.418618	15	15	0.436289		214	251	94
2210.42	4524.02	0.274058	202	233	97	-0.349149	0.726978	-0.349149	0.726978	14	15	0.747192		246	219	99	0.559954	0.575511	0.559954	0.575511	15	15	0.594884		230	235	110	-0.103695	0.917411	-0.103695	0.917411	15	15	0.934887		213	252	93	-0.808822	0.418618	-0.808822	0.418618	15	15	0.436289		215	250	95
2212.35	4520.08	0.274297	202	233	97	-0.349149	0.726978	-0.349149	0.726978	14	15	0.747192		245	220	100	0.518476	0.604127	0.518476	0.604127	15	15	0.623594		229	236	109	-0.145173	0.884574	-0.145173	0.884574	15	15	0.902462		213	252	93	-0.808822	0.418618	-0.808822	0.418618	15	15	0.436289		214	251	94
2214.28	4516.14	0.274536	202	233	97	-0.349149	0.726978	-0.349149	0.726978	14	15	0.747192		245	220	100	0.518476	0.604127	0.518476	0.604127	15	15	0.623594		229	236	109	-0.145173	0.884574	-0.145173	0.884574	15	15	0.902462		213	252	93	-0.808822	0.418618	-0.808822	0.418618	15	15	0.436289		214	251	94
2216.21	4512.21	0.274775	202	233	97	-0.349149	0.726978	-0.349149	0.726978	14	15	0.747192		246	219	99	0.559954	0.575511	0.559954	0.575511	15	15	0.594884		229	236	109	-0.145173	0.884574	-0.145173	0.884574	15	15	0.902462		213	252	93	-0.808822	0.418618	-0.808822	0.418618	15	15	0.436289		214	251	94
2218.14	4508.28	0.275014	202	233	97	-0.349149	0.726978	-0.349149	0.726978	14	15	0.747192		246	219	99	0.559954	0.575511	0.559954	0.575511	15	15	0.594884		229	236	109	-0.145173	0.884574	-0.145173	0.884574	15	15	0.902462		213	252	93	-0.808822	0.418618	-0.808822	0.418618	15	15	0.436289		215	250	95
2220.07	4504.37	0.275253	202	233	97	-0.349149	0.726978	-0.349149	0.726978	14	15	0.747192		246	219	99	0.559954	0.575511	0.559954	0.575511	15	15	0.594884		229	236	109	-0.145173	0.884574	-0.145173	0.884574	15	15	0.902462		213	252	93	-0.808822	0.418618	-0.808822	0.418618	15	15	0.436289		214	251	94
2222	4500.46	0.275492	202	233	97	-0.349149	0.726978	-0.349149	0.726978	14	15	0.747192		246	219	99	0.559954	0.575511	0.559954	0.575511	15	15	0.594884		229	236	109	-0.145173	0.884574	-0.145173	0.884574	15	15	0.902462		213	252	93	-0.808822	0.418618	-0.808822	0.418618	15	15	0.436289		214	251	94
2223.92	4496.55	0.275732	202	233	97	-0.349149	0.726978	-0.349149	0.726978	14	15	0.747192		246	219	99	0.559954	0.575511	0.559954	0.575511	15	15	0.594884		229	236	109	-0.145173	0.884574	-0.145173	0.884574	15	15	0.902462		213	252	93	-0.808822	0.418618	-0.808822	0.418618	15	15	0.436289		214	251	94
2225.85	4492.66	0.275971	202	233	97	-0.349149	0.726978	-0.349149	0.726978	14	15	0.747192		245	220	100	0.518476	0.604127	0.518476	0.604127	15	15	0.623594		229	236	109	-0.145173	0.884574	-0.145173	0.884574	15	15	0.902462		213	252	93	-0.808822	0.418618	-0.808822	0.418618	15	15	0.436289		214	251	94
2227.78	4488.77	0.27621	202	233	97	-0.349149	0.726978	-0.349149	0.726978	14	15	0.747192		246	219	99	0.559954	0.575511	0.559954	0.575511	15	15	0.594884		229	236	109	-0.145173	0.884574	-0.145173	0.884574	15	15	0.902462		213	252	93	-0.808822	0.418618	-0.808822	0.418618	15	15	0.436289		214	251	94
2229.71	4484.89	0.276449	202	233	97	-0.349149	0.726978	-0.349149	0.726978	14	15	0.747192		246	219	99	0.559954	0.575511	0.559954	0.575511	15	15	0.594884		228	237	108	-0.186651	0.851934	-0.186651	0.851934	15	15	0.870194		213	252	93	-0.808822	0.418618	-0.808822	0.418618	15	15	0.436289		214	251	94
2231.64	4481.01	0.276688	202	233	97	-0.349149	0.726978	-0.349149	0.726978	14	15	0.747192		246	219	99	0.559954	0.575511	0.559954	0.575511	15	15	0.594884		228	237	108	-0.186651	0.851934	-0.186651	0.851934	15	15	0.870194		213	252	93	-0.808822	0.418618	-0.808822	0.418618	15	15	0.436289		214	251	94
2233.57	4477.14	0.276927	202	233	97	-0.349149	0.726978	-0.349149	0.726978	14	15	0.747192		246	219	99	0.559954	0.575511	0.559954	0.575511	15	15	0.594884		227	238	107	-0.228129	0.819546	-0.228129	0.819546	15	15	0.838135		213	252	93	-0.808822	0.418618	-0.808822	0.418618	15	15	0.436289		214	251	94
2235.5	4473.28	0.277166	202	233	97	-0.349149	0.726978	-0.349149	0.726978	14	15	0.747192		245	220	100	0.518476	0.604127	0.518476	0.604127	15	15	0.623594		227	238	107	-0.228129	0.819546	-0.228129	0.819546	15	15	0.838135		213	252	93	-0.808822	0.418618	-0.808822	0.418618	15	15	0.436289		214	251	94
2237.43	4469.42	0.277406	202	233	97	-0.349149	0.726978	-0.349149	0.726978	14	15	0.747192		245	220	100	0.518476	0.604127	0.518476	0.604127	15	15	0.623594		227	238	107	-0.228129	0.819546	-0.228129	0.819546	15	15	0.838135		213	252	93	-0.808822	0.418618	-0.808822	0.418618	15	15	0.436289		214	251	94
2239.36	4465.57	0.277645	202	233	97	-0.349149	0.726978	-0.349149	0.726978	14	15	0.747192		246	219	99	0.559954	0.575511	0.559954	0.575511	15	15	0.594884		227	238	107	-0.228129	0.819546	-0.228129	0.819546	15	15	0.838135		213	252	93	-0.808822	0.418618	-0.808822	0.418618	15	15	0.436289		214	251	94
2241.28	4461.73	0.277884	202	233	97	-0.349149	0.726978	-0.349149	0.726978	14	15	0.747192		246	219	99	0.559954	0.575511	0.559954	0.575511	15	15	0.594884		227	238	107	-0.228129	0.819546	-0.228129	0.819546	15	15	0.838135		215	250	95	-0.725866	0.467921	-0.725866	0.467921	15	15	0.486365		214	251	94
2243.21	4457.89	0.278123	202	233	97	-0.349149	0.726978	-0.349149	0.726978	14	15	0.747192		245	220	100	0.518476	0.604127	0.518476	0.604127	15	15	0.623594		227	238	107	-0.228129	0.819546	-0.228129	0.819546	15	15	0.838135		215	250	95	-0.725866	0.467921	-0.725866	0.467921	15	15	0.486365		215	250	95
2245.14	4454.06	0.278362	202	233	97	-0.349149	0.726978	-0.349149	0.726978	14	15	0.747192		245	220	100	0.518476	0.604127	0.518476	0.604127	15	15	0.623594		227	238	107	-0.228129	0.819546	-0.228129	0.819546	15	15	0.838135		215	250	95	-0.725866	0.467921	-0.725866	0.467921	15	15	0.486365		216	249	96
2247.07	4450.24	0.278601	201	234	96	-0.392792	0.694473	-0.392792	0.694473	14	15	0.71483		245	220	100	0.518476	0.604127	0.518476	0.604127	15	15	0.623594		226	239	106	-0.269607	0.787462	-0.269607	0.787462	15	15	0.806334		215	250	95	-0.725866	0.467921	-0.725866	0.467921	15	15	0.486365		216	249	96
2249	4446.42	0.27884	201	234	96	-0.392792	0.694473	-0.392792	0.694473	14	15	0.71483		245	220	100	0.518476	0.604127	0.518476	0.604127	15	15	0.623594		226	239	106	-0.269607	0.787462	-0.269607	0.787462	15	15	0.806334		215	250	95	-0.725866	0.467921	-0.725866	0.467921	15	15	0.486365		216	249	96
2250.93	4442.61	0.27908	201	234	96	-0.392792	0.694473	-0.392792	0.694473	14	15	0.71483		245	220	100	0.518476	0.604127	0.518476	0.604127	15	15	0.623594		225	240	105	-0.311086	0.755736	-0.311086	0.755736	15	15	0.77484		216	249	96	-0.684388	0.493731	-0.684388	0.493731	15	15	0.512486		216	249	96
2252.86	4438.81	0.279319	201	234	96	-0.392792	0.694473	-0.392792	0.694473	14	15	0.71483		245	220	100	0.518476	0.604127	0.518476	0.604127	15	15	0.623594		224	241	104	-0.352564	0.724416	-0.352564	0.724416	15	15	0.743702		216	249	96	-0.684388	0.493731	-0.684388	0.493731	15	15	0.512486		216	249	96
2254.79	4435.01	0.279558	200	235	95	-0.436436	0.662521	-0.436436	0.662521	14	15	0.682954		245	220	100	0.518476	0.604127	0.518476	0.604127	15	15	0.623594		224	241	104	-0.352564	0.724416	-0.352564	0.724416	15	15	0.743702		216	249	96	-0.684388	0.493731	-0.684388	0.493731	15	15	0.512486		216	249	96
2256.71	4431.22	0.279797	200	235	95	-0.436436	0.662521	-0.436436	0.662521	14	15	0.682954		245	220	100	0.518476	0.604127	0.518476	0.604127	15	15	0.623594		224	241	104	-0.352564	0.724416	-0.352564	0.724416	15	15	0.743702		216	249	96	-0.684388	0.493731	-0.684388	0.493731	15	15	0.512486		217	248	97
2258.64	4427.44	0.280036	200	235	95	-0.436436	0.662521	-0.436436	0.662521	14	15	0.682954		245	220	100	0.518476	0.604127	0.518476	0.604127	15	15	0.623594		224	241	104	-0.352564	0.724416	-0.352564	0.724416	15	15	0.743702		216	249	96	-0.684388	0.493731	-0.684388	0.493731	15	15	0.512486		217	248	97
2260.57	4423.66	0.280275	200	235	95	-0.436436	0.662521	-0.436436	0.662521	14	15	0.682954		245	220	100	0.518476	0.604127	0.518476	0.604127	15	15	0.623594		224	241	104	-0.352564	0.724416	-0.352564	0.724416	15	15	0.743702		216	249	96	-0.684388	0.493731	-0.684388	0.493731	15	15	0.512486		217	248	97
2262.5	4419.89	0.280514	200	235	95	-0.436436	0.662521	-0.436436	0.662521	14	15	0.682954		245	220	100	0.518476	0.604127	0.518476	0.604127	15	15	0.623594		224	241	104	-0.352564	0.724416	-0.352564	0.724416	15	15	0.743702		216	249	96	-0.684388	0.493731	-0.684388	0.493731	15	15	0.512486		218	247	98
2264.43	4416.12	0.280754	200	235	95	-0.436436	0.662521	-0.436436	0.662521	14	15	0.682954		245	220	100	0.518476	0.604127	0.518476	0.604127	15	15	0.623594		224	241	104	-0.352564	0.724416	-0.352564	0.724416	15	15	0.743702		216	249	96	-0.684388	0.493731	-0.684388	0.493731	15	15	0.512486		216	249	96
2266.36	4412.36	0.280993	199	236	94	-0.480079	0.631171	-0.480079	0.631171	14	15	0.651619		245	220	100	0.518476	0.604127	0.518476	0.604127	15	15	0.623594		225	240	105	-0.311086	0.755736	-0.311086	0.755736	15	15	0.77484		216	249	96	-0.684388	0.493731	-0.684388	0.493731	15	15	0.512486		217	248	97
2268.29	4408.61	0.281232	199	236	94	-0.480079	0.631171	-0.480079	0.631171	14	15	0.651619		244	221	101	0.476998	0.633364	0.476998	0.633364	15	15	0.65287		225	240	105	-0.311086	0.755736	-0.311086	0.755736	15	15	0.77484		216	249	96	-0.684388	0.493731	-0.684388	0.493731	15	15	0.512486		217	248	97
2270.22	4404.87	0.281471	199	236	94	-0.480079	0.631171	-0.480079	0.631171	14	15	0.651619		245	220	100	0.518476	0.604127	0.518476	0.604127	15	15	0.623594		225	240	105	-0.311086	0.755736	-0.311086	0.755736	15	15	0.77484		216	249	96	-0.684388	0.493731	-0.684388	0.493731	15	15	0.512486		218	247	98
2272.15	4401.13	0.28171	199	236	94	-0.480079	0.631171	-0.480079	0.631171	14	15	0.651619		245	220	100	0.518476	0.604127	0.518476	0.604127	15	15	0.623594		225	240	105	-0.311086	0.755736	-0.311086	0.755736	15	15	0.77484		216	249	96	-0.684388	0.493731	-0.684388	0.493731	15	15	0.512486		215	250	95
2274.07	4397.39	0.281949	199	236	94	-0.480079	0.631171	-0.480079	0.631171	14	15	0.651619		245	220	100	0.518476	0.604127	0.518476	0.604127	15	15	0.623594		225	240	105	-0.311086	0.755736	-0.311086	0.755736	15	15	0.77484		215	250	95	-0.725866	0.467921	-0.725866	0.467921	15	15	0.486365		215	250	95
2276	4393.67	0.282188	199	236	94	-0.480079	0.631171	-0.480079	0.631171	14	15	0.651619		245	220	100	0.518476	0.604127	0.518476	0.604127	15	15	0.623594		225	240	105	-0.311086	0.755736	-0.311086	0.755736	15	15	0.77484		215	250	95	-0.725866	0.467921	-0.725866	0.467921	15	15	0.486365		215	250	95
2277.93	4389.95	0.282428	199	236	94	-0.480079	0.631171	-0.480079	0.631171	14	15	0.651619		245	220	100	0.518476	0.604127	0.518476	0.604127	15	15	0.623594		224	241	104	-0.352564	0.724416	-0.352564	0.724416	15	15	0.743702		215	250	95	-0.725866	0.467921	-0.725866	0.467921	15	15	0.486365		217	248	97
2279.86	4386.23	0.282667	199	236	94	-0.480079	0.631171	-0.480079	0.631171	14	15	0.651619		245	220	100	0.518476	0.604127	0.518476	0.604127	15	15	0.623594		224	241	104	-0.352564	0.724416	-0.352564	0.724416	15	15	0.743702		215	250	95	-0.725866	0.467921	-0.725866	0.467921	15	15	0.486365		218	247	98
2281.79	4382.53	0.282906	199	236	94	-0.480079	0.631171	-0.480079	0.631171	14	15	0.651619		245	220	100	0.518476	0.604127	0.518476	0.604127	15	15	0.623594		224	241	104	-0.352564	0.724416	-0.352564	0.724416	15	15	0.743702		215	250	95	-0.725866	0.467921	-0.725866	0.467921	15	15	0.486365		218	247	98
2283.72	4378.82	0.283145	199	236	94	-0.480079	0.631171	-0.480079	0.631171	14	15	0.651619		245	220	100	0.518476	0.604127	0.518476	0.604127	15	15	0.623594		224	241	104	-0.352564	0.724416	-0.352564	0.724416	15	15	0.743702		215	250	95	-0.725866	0.467921	-0.725866	0.467921	15	15	0.486365		218	247	98
2285.65	4375.13	0.283384	197	238	92	-0.567367	0.570466	-0.567367	0.570466	14	15	0.590745		245	220	100	0.518476	0.604127	0.518476	0.604127	15	15	0.623594		225	240	105	-0.311086	0.755736	-0.311086	0.755736	15	15	0.77484		215	250	95	-0.725866	0.467921	-0.725866	0.467921	15	15	0.486365		216	249	96
2287.58	4371.44	0.283623	197	238	92	-0.567367	0.570466	-0.567367	0.570466	14	15	0.590745		244	221	101	0.476998	0.633364	0.476998	0.633364	15	15	0.65287		225	240	105	-0.311086	0.755736	-0.311086	0.755736	15	15	0.77484		216	249	96	-0.684388	0.493731	-0.684388	0.493731	15	15	0.512486		213	252	93
2289.5	4367.76	0.283862	196	239	91	-0.61101	0.541193	-0.61101	0.541193	14	15	0.561291		245	220	100	0.518476	0.604127	0.518476	0.604127	15	15	0.623594		223	242	103	-0.394042	0.693551	-0.394042	0.693551	15	15	0.712965		215	250	95	-0.725866	0.467921	-0.725866	0.467921	15	15	0.486365		215	250	95
2291.43	4364.08	0.284102	195	240	90	-0.654654	0.512691	-0.654654	0.512691	14	15	0.532545		246	219	99	0.559954	0.575511	0.559954	0.575511	15	15	0.594884		222	243	102	-0.43552	0.663186	-0.43552	0.663186	15	15	0.682674		215	250	95	-0.725866	0.467921	-0.725866	0.467921	15	15	0.486365		214	251	94
2293.36	4360.41	0.284341	195	240	90	-0.654654	0.512691	-0.654654	0.512691	14	15	0.532545		244	221	101	0.476998	0.633364	0.476998	0.633364	15	15	0.65287		222	243	102	-0.43552	0.663186	-0.43552	0.663186	15	15	0.682674		216	249	96	-0.684388	0.493731	-0.684388	0.493731	15	15	0.512486		214	251	94
2295.29	4356.75	0.28458	195	240	90	-0.654654	0.512691	-0.654654	0.512691	14	15	0.532545		245	220	100	0.518476	0.604127	0.518476	0.604127	15	15	0.623594		221	244	101	-0.476998	0.633364	-0.476998	0.633364	15	15	0.65287		215	250	95	-0.725866	0.467921	-0.725866	0.467921	15	15	0.486365		214	251	94
2297.22	4353.09	0.284819	194	241	89	-0.698297	0.484992	-0.698297	0.484992	14	15	0.504539		246	219	99	0.559954	0.575511	0.559954	0.575511	15	15	0.594884		221	244	101	-0.476998	0.633364	-0.476998	0.633364	15	15	0.65287		214	251	94	-0.767344	0.442877	-0.767344	0.442877	15	15	0.460959		214	251	94
2299.15	4349.44	0.285058	194	241	89	-0.698297	0.484992	-0.698297	0.484992	14	15	0.504539		244	221	101	0.476998	0.633364	0.476998	0.633364	15	15	0.65287		220	245	100	-0.518476	0.604127	-0.518476	0.604127	15	15	0.623594		214	251	94	-0.767344	0.442877	-0.767344	0.442877	15	15	0.460959		215	250	95
2301.08	4345.79	0.285297	194	241	89	-0.698297	0.484992	-0.698297	0.484992	14	15	0.504539		245	220	100	0.518476	0.604127	0.518476	0.604127	15	15	0.623594		219	246	99	-0.559954	0.575511	-0.559954	0.575511	15	15	0.594884		212	253	92	-0.8503	0.395159	-0.8503	0.395159	15	15	0.412376		214	251	94
2303.01	4342.15	0.285536	193	242	88	-0.741941	0.458124	-0.741941	0.458124	14	15	0.477307		244	221	101	0.476998	0.633364	0.476998	0.633364	15	15	0.65287		219	246	99	-0.559954	0.575511	-0.559954	0.575511	15	15	0.594884		213	252	93	-0.808822	0.418618	-0.808822	0.418618	15	15	0.436289		214	251	94
2304.94	4338.52	0.285776	189	246	84	-0.916515	0.359397	-0.916515	0.359397	14	15	0.376588		243	222	102	0.43552	0.663186	0.43552	0.663186	15	15	0.682674		221	244	101	-0.476998	0.633364	-0.476998	0.633364	15	15	0.65287		215	250	95	-0.725866	0.467921	-0.725866	0.467921	15	15	0.486365		215	250	95
2306.86	4334.89	0.286015	185	250	80	-1.09109	0.275234	-1.09109	0.275234	14	15	0.289776		244	221	101	0.476998	0.633364	0.476998	0.633364	15	15	0.65287		219	246	99	-0.559954	0.575511	-0.559954	0.575511	15	15	0.594884		213	252	93	-0.808822	0.418618	-0.808822	0.418618	15	15	0.436289		213	252	93
2308.79	4331.27	0.286254	184	251	79	-1.13473	0.256488	-1.13473	0.256488	14	15	0.270299		244	221	101	0.476998	0.633364	0.476998	0.633364	15	15	0.65287		220	245	100	-0.518476	0.604127	-0.518476	0.604127	15	15	0.623594		213	252	93	-0.808822	0.418618	-0.808822	0.418618	15	15	0.436289		210	255	90
2310.72	4327.65	0.286493	183	252	78	-1.17838	0.238647	-1.17838	0.238647	14	15	0.251712		243	222	102	0.43552	0.663186	0.43552	0.663186	15	15	0.682674		218	247	98	-0.601432	0.547553	-0.601432	0.547553	15	15	0.566774		214	251	94	-0.767344	0.442877	-0.767344	0.442877	15	15	0.460959		209	256	89
2312.65	4324.04	0.286732	183	252	78	-1.17838	0.238647	-1.17838	0.238647	14	15	0.251712		243	222	102	0.43552	0.663186	0.43552	0.663186	15	15	0.682674		217	248	97	-0.64291	0.520283	-0.64291	0.520283	15	15	0.539299		215	250	95	-0.725866	0.467921	-0.725866	0.467921	15	15	0.486365		210	255	90
2314.58	4320.44	0.286971	184.5	250.5	79.5	-1.11291	0.265747	-1.11305	0.265689	14	15	0.270299		243	222	102	0.43552	0.663186	0.43552	0.663186	15	15	0.682674		216	249	96	-0.684388	0.493731	-0.684388	0.493731	15	15	0.512486		215	250	95	-0.725866	0.467921	-0.725866	0.467921	15	15	0.486365		208	257	88
2316.51	4316.84	0.28721	181	254	76	-1.26566	0.205634	-1.26566	0.205634	14	15	0.217176		243	222	102	0.43552	0.663186	0.43552	0.663186	15	15	0.682674		212	253	92	-0.8503	0.395159	-0.8503	0.395159	15	15	0.412376		213	252	93	-0.808822	0.418618	-0.808822	0.418618	15	15	0.436289		208	257	88
2318.44	4313.25	0.28745	176	259	71	-1.48388	0.137841	-1.48388	0.137841	14	15	0.145619		242	223	103	0.394042	0.693551	0.394042	0.693551	15	15	0.712965		209	256	89	-0.974735	0.329693	-0.974735	0.329693	15	15	0.345311		216	249	96	-0.684388	0.493731	-0.684388	0.493731	15	15	0.512486		205	260	85
2320.37	4309.67	0.287689	176	259	71	-1.48388	0.137841	-1.48388	0.137841	14	15	0.145619		241	224	104	0.352564	0.724416	0.352564	0.724416	15	15	0.743702		207	258	87	-1.05769	0.290197	-1.05769	0.290197	15	15	0.304591		217	248	97	-0.64291	0.520283	-0.64291	0.520283	15	15	0.539299		204	261	84
2322.29	4306.09	0.287928	177	258	72	-1.44024	0.149801	-1.44024	0.149801	14	15	0.158309		240	225	105	0.311086	0.755736	0.311086	0.755736	15	15	0.77484		208	257	88	-1.01621	0.309529	-1.01621	0.309529	15	15	0.324548		219	246	99	-0.559954	0.575511	-0.559954	0.575511	15	15	0.594884		201	264	81
2324.22	4302.51	0.288167	176	259	71	-1.48388	0.137841	-1.48388	0.137841	14	15	0.145619		241	224	104	0.352564	0.724416	0.352564	0.724416	15	15	0.743702		205	260	85	-1.14065	0.254018	-1.14065	0.254018	15	15	0.267097		217	248	97	-0.64291	0.520283	-0.64291	0.520283	15	15	0.539299		200	265	80
2326.15	4298.95	0.288406	175	260	70	-1.52753	0.126631	-1.52753	0.126631	14	15	0.1337		241	224	104	0.352564	0.724416	0.352564	0.724416	15	15	0.743702		205	260	85	-1.14065	0.254018	-1.14065	0.254018	15	15	0.267097		218	247	98	-0.601432	0.547553	-0.601432	0.547553	15	15	0.566774		200	265	80
2328.08	4295.38	0.288645	173	262	68	-1.61481	0.106352	-1.61481	0.106352	14	15	0.11207		241	224	104	0.352564	0.724416	0.352564	0.724416	15	15	0.743702		203	262	83	-1.2236	0.221103	-1.2236	0.221103	15	15	0.232812		218	247	98	-0.601432	0.547553	-0.601432	0.547553	15	15	0.566774		200	265	80
2330.01	4291.83	0.288884	172	263	67	-1.65846	0.0972264	-1.65846	0.0972264	14	15	0.102309		241	224	104	0.352564	0.724416	0.352564	0.724416	15	15	0.743702		201	264	81	-1.30656	0.191363	-1.30656	0.191363	15	15	0.201679		218	247	98	-0.601432	0.547553	-0.601432	0.547553	15	15	0.566774		200	265	80
2331.94	4288.28	0.289124	171	264	66	-1.7021	0.0887377	-1.7021	0.0887377	14	15	0.0932157		242	223	103	0.394042	0.693551	0.394042	0.693551	15	15	0.712965		200	265	80	-1.34804	0.177647	-1.34804	0.177647	15	15	0.187268		217	248	97	-0.64291	0.520283	-0.64291	0.520283	15	15	0.539299		200	265	80
2333.87	4284.73	0.289363	170	265	65	-1.74574	0.0808565	-1.74574	0.0808565	14	15	0.0847612		242	223	103	0.394042	0.693551	0.394042	0.693551	15	15	0.712965		200	265	80	-1.34804	0.177647	-1.34804	0.177647	15	15	0.187268		217	248	97	-0.64291	0.520283	-0.64291	0.520283	15	15	0.539299		200	265	80
2335.8	4281.2	0.289602	171	264	66	-1.7021	0.0887377	-1.7021	0.0887377	14	15	0.0932157		242	223	103	0.394042	0.693551	0.394042	0.693551	15	15	0.712965		198	267	78	-1.43099	0.152433	-1.43099	0.152433	15	15	0.160685		218	247	98	-0.601432	0.547553	-0.601432	0.547553	15	15	0.566774		198	267	78
2337.72	4277.66	0.289841	171	264	66	-1.7021	0.0887377	-1.7021	0.0887377	14	15	0.0932157		238	227	107	0.228129	0.819546	0.228129	0.819546	15	15	0.838135		196	269	76	-1.51395	0.13004	-1.51395	0.13004	15	15	0.136974		217	248	97	-0.64291	0.520283	-0.64291	0.520283	15	15	0.539299		198	267	78
2339.65	4274.14	0.29008	171	264	66	-1.7021	0.0887377	-1.7021	0.0887377	14	15	0.0932157		238	227	107	0.228129	0.819546	0.228129	0.819546	15	15	0.838135		195	270	75	-1.55543	0.119845	-1.55543	0.119845	15	15	0.126147		217	248	97	-0.64291	0.520283	-0.64291	0.520283	15	15	0.539299		197	268	77
2341.58	4270.62	0.290319	171	264	66	-1.7021	0.0887377	-1.7021	0.0887377	14	15	0.0932157		239	226	106	0.269607	0.787462	0.269607	0.787462	15	15	0.806334		195	270	75	-1.55543	0.119845	-1.55543	0.119845	15	15	0.126147		217	248	97	-0.64291	0.520283	-0.64291	0.520283	15	15	0.539299		197	268	77
2343.51	4267.1	0.290558	172	263	67	-1.65846	0.0972264	-1.65846	0.0972264	14	15	0.102309		239	226	106	0.269607	0.787462	0.269607	0.787462	15	15	0.806334		199	266	79	-1.38952	0.164677	-1.38952	0.164677	15	15	0.173609		215	250	95	-0.725866	0.467921	-0.725866	0.467921	15	15	0.486365		196	269	76
2345.44	4263.59	0.290798	176	259	71	-1.48388	0.137841	-1.48388	0.137841	14	15	0.145619		242	223	103	0.394042	0.693551	0.394042	0.693551	15	15	0.712965		200	265	80	-1.34804	0.177647	-1.34804	0.177647	15	15	0.187268		215	250	95	-0.725866	0.467921	-0.725866	0.467921	15	15	0.486365		200	265	80
2347.37	4260.09	0.291037	176	259	71	-1.48388	0.137841	-1.48388	0.137841	14	15	0.145619		240	225	105	0.311086	0.755736	0.311086	0.755736	15	15	0.77484		205	260	85	-1.14065	0.254018	-1.14065	0.254018	15	15	0.267097		214	251	94	-0.767344	0.442877	-0.767344	0.442877	15	15	0.460959		200	265	80
2349.3	4256.59	0.291276	176	259	71	-1.48388	0.137841	-1.48388	0.137841	14	15	0.145619		240	225	105	0.311086	0.755736	0.311086	0.755736	15	15	0.77484		204	261	84	-1.18212	0.237157	-1.18212	0.237157	15	15	0.249556		215	250	95	-0.725866	0.467921	-0.725866	0.467921	15	15	0.486365		201	264	81
2351.23	4253.1	0.291515	171	264	66	-1.7021	0.0887377	-1.7021	0.0887377	14	15	0.0932157		242	223	103	0.394042	0.693551	0.394042	0.693551	15	15	0.712965		200	265	80	-1.34804	0.177647	-1.34804	0.177647	15	15	0.187268		219	246	99	-0.559954	0.575511	-0.559954	0.575511	15	15	0.594884		198	267	78
2353.16	4249.61	0.291754	169	266	64	-1.78939	0.0735535	-1.78939	0.0735535	14	15	0.076919		242	223	103	0.394042	0.693551	0.394042	0.693551	15	15	0.712965		194	271	74	-1.59691	0.110288	-1.59691	0.110288	15	15	0.115979		218	247	98	-0.601432	0.547553	-0.601432	0.547553	15	15	0.566774		194	271	74
2355.08	4246.13	0.291993	171	264	66	-1.7021	0.0887377	-1.7021	0.0887377	14	15	0.0932157		244	221	101	0.476998	0.633364	0.476998	0.633364	15	15	0.65287		195	270	75	-1.55543	0.119845	-1.55543	0.119845	15	15	0.126147		218	247	98	-0.601432	0.547553	-0.601432	0.547553	15	15	0.566774		192	273	72
2357.01	4242.66	0.292232	171	264	66	-1.7021	0.0887377	-1.7021	0.0887377	14	15	0.0932157		241	224	104	0.352564	0.724416	0.352564	0.724416	15	15	0.743702		194	271	74	-1.59691	0.110288	-1.59691	0.110288	15	15	0.115979		217	248	97	-0.64291	0.520283	-0.64291	0.520283	15	15	0.539299		194	271	74
2358.94	4239.19	0.292472	170	265	65	-1.74574	0.0808565	-1.74574	0.0808565	14	15	0.0847612		243	222	102	0.43552	0.663186	0.43552	0.663186	15	15	0.682674		193	272	73	-1.63838	0.101343	-1.63838	0.101343	15	15	0.106446		218	247	98	-0.601432	0.547553	-0.601432	0.547553	15	15	0.566774		193	272	73
2360.87	4235.73	0.292711	170	265	65	-1.74574	0.0808565	-1.74574	0.0808565	14	15	0.0847612		242	223	103	0.394042	0.693551	0.394042	0.693551	15	15	0.712965		192	273	72	-1.67986	0.0929852	-1.67986	0.0929852	15	15	0.0975258		217	248	97	-0.64291	0.520283	-0.64291	0.520283	15	15	0.539299		193	272	73
2362.8	4232.27	0.29295	171	264	66	-1.7021	0.0887377	-1.7021	0.0887377	14	15	0.0932157		241	224	104	0.352564	0.724416	0.352564	0.724416	15	15	0.743702		193	272	73	-1.63838	0.101343	-1.63838	0.101343	15	15	0.106446		218	247	98	-0.601432	0.547553	-0.601432	0.547553	15	15	0.566774		193	272	73
2364.73	4228.82	0.293189	172	263	67	-1.65846	0.0972264	-1.65846	0.0972264	14	15	0.102309		241	224	104	0.352564	0.724416	0.352564	0.724416	15	15	0.743702		192	273	72	-1.67986	0.0929852	-1.67986	0.0929852	15	15	0.0975258		218	247	98	-0.601432	0.547553	-0.601432	0.547553	15	15	0.566774		195	270	75
2366.66	4225.37	0.293428	171	264	66	-1.7021	0.0887377	-1.7021	0.0887377	14	15	0.0932157		240	225	105	0.311086	0.755736	0.311086	0.755736	15	15	0.77484		195	270	75	-1.55543	0.119845	-1.55543	0.119845	15	15	0.126147		218	247	98	-0.601432	0.547553	-0.601432	0.547553	15	15	0.566774		194	271	74
2368.59	4221.93	0.293667	170	265	65	-1.74574	0.0808565	-1.74574	0.0808565	14	15	0.0847612		238	227	107	0.228129	0.819546	0.228129	0.819546	15	15	0.838135		195	270	75	-1.55543	0.119845	-1.55543	0.119845	15	15	0.126147		217	248	97	-0.64291	0.520283	-0.64291	0.520283	15	15	0.539299		196	269	76
2370.51	4218.49	0.293906	171	264	66	-1.7021	0.0887377	-1.7021	0.0887377	14	15	0.0932157		242	223	103	0.394042	0.693551	0.394042	0.693551	15	15	0.712965		199	266	79	-1.38952	0.164677	-1.38952	0.164677	15	15	0.173609		217	248	97	-0.64291	0.520283	-0.64291	0.520283	15	15	0.539299		199	266	79
2372.44	4215.06	0.294146	178	257	73	-1.39659	0.162537	-1.39659	0.162537	14	15	0.171789		241	224	104	0.352564	0.724416	0.352564	0.724416	15	15	0.743702		205	260	85	-1.14065	0.254018	-1.14065	0.254018	15	15	0.267097		217	248	97	-0.64291	0.520283	-0.64291	0.520283	15	15	0.539299		200	265	80
2374.37	4211.64	0.294385	177	258	72	-1.44024	0.149801	-1.44024	0.149801	14	15	0.158309		242	223	103	0.394042	0.693551	0.394042	0.693551	15	15	0.712965		208	257	88	-1.01621	0.309529	-1.01621	0.309529	15	15	0.324548		214	251	94	-0.767344	0.442877	-0.767344	0.442877	15	15	0.460959		202	263	82
2376.3	4208.22	0.294624	184	251	79	-1.13473	0.256488	-1.13473	0.256488	14	15	0.270299		240	225	105	0.311086	0.755736	0.311086	0.755736	15	15	0.77484		214	251	94	-0.767344	0.442877	-0.767344	0.442877	15	15	0.460959		216	249	96	-0.684388	0.493731	-0.684388	0.493731	15	15	0.512486		203	262	83
2378.23	4204.81	0.294863	186	249	81	-1.04745	0.294895	-1.04745	0.294895	14	15	0.310143		243	222	102	0.43552	0.663186	0.43552	0.663186	15	15	0.682674		216	249	96	-0.684388	0.493731	-0.684388	0.493731	15	15	0.512486		215	250	95	-0.725866	0.467921	-0.725866	0.467921	15	15	0.486365		204	261	84
2380.16	4201.4	0.295102	188	247	83	-0.960159	0.336976	-0.960159	0.336976	14	15	0.353554		241	224	104	0.352564	0.724416	0.352564	0.724416	15	15	0.743702		220	245	100	-0.518476	0.604127	-0.518476	0.604127	15	15	0.623594		216	249	96	-0.684388	0.493731	-0.684388	0.493731	15	15	0.512486		211	254	91
2382.09	4198	0.295341	195	240	90	-0.654654	0.512691	-0.654654	0.512691	14	15	0.532545		237	228	108	0.186651	0.851934	0.186651	0.851934	15	15	0.870194		221	244	101	-0.476998	0.633364	-0.476998	0.633364	15	15	0.65287		211	254	91	-0.891778	0.372512	-0.891778	0.372512	15	15	0.389233		215	250	95
2384.02	4194.6	0.29558	198	237	93	-0.523723	0.600472	-0.523723	0.600472	14	15	0.620867		238	227	107	0.228129	0.819546	0.228129	0.819546	15	15	0.838135		220	245	100	-0.518476	0.604127	-0.518476	0.604127	15	15	0.623594		212	253	92	-0.8503	0.395159	-0.8503	0.395159	15	15	0.412376		215	250	95
2385.95	4191.21	0.295819	198	237	93	-0.523723	0.600472	-0.523723	0.600472	14	15	0.620867		239	226	106	0.269607	0.787462	0.269607	0.787462	15	15	0.806334		222	243	102	-0.43552	0.663186	-0.43552	0.663186	15	15	0.682674		212	253	92	-0.8503	0.395159	-0.8503	0.395159	15	15	0.412376		215	250	95
2387.87	4187.83	0.296059	199	236	94	-0.480079	0.631171	-0.480079	0.631171	14	15	0.651619		240	225	105	0.311086	0.755736	0.311086	0.755736	15	15	0.77484		221	244	101	-0.476998	0.633364	-0.476998	0.633364	15	15	0.65287		212	253	92	-0.8503	0.395159	-0.8503	0.395159	15	15	0.412376		215	250	95
2389.8	4184.45	0.296298	199	236	94	-0.480079	0.631171	-0.480079	0.631171	14	15	0.651619		239	226	106	0.269607	0.787462	0.269607	0.787462	15	15	0.806334		221	244	101	-0.476998	0.633364	-0.476998	0.633364	15	15	0.65287		212	253	92	-0.8503	0.395159	-0.8503	0.395159	15	15	0.412376		215	250	95
2391.73	4181.07	0.296537	200	235	95	-0.436436	0.662521	-0.436436	0.662521	14	15	0.682954		239	226	106	0.269607	0.787462	0.269607	0.787462	15	15	0.806334		221	244	101	-0.476998	0.633364	-0.476998	0.633364	15	15	0.65287		212	253	92	-0.8503	0.395159	-0.8503	0.395159	15	15	0.412376		215	250	95
2393.66	4177.7	0.296776	200	235	95	-0.436436	0.662521	-0.436436	0.662521	14	15	0.682954		239	226	106	0.269607	0.787462	0.269607	0.787462	15	15	0.806334		221	244	101	-0.476998	0.633364	-0.476998	0.633364	15	15	0.65287		213	252	93	-0.808822	0.418618	-0.808822	0.418618	15	15	0.436289		217	248	97
2395.59	4174.34	0.297015	200	235	95	-0.436436	0.662521	-0.436436	0.662521	14	15	0.682954		239	226	106	0.269607	0.787462	0.269607	0.787462	15	15	0.806334		222	243	102	-0.43552	0.663186	-0.43552	0.663186	15	15	0.682674		213	252	93	-0.808822	0.418618	-0.808822	0.418618	15	15	0.436289		218	247	98
2397.52	4170.98	0.297254	200	235	95	-0.436436	0.662521	-0.436436	0.662521	14	15	0.682954		239	226	106	0.269607	0.787462	0.269607	0.787462	15	15	0.806334		222	243	102	-0.43552	0.663186	-0.43552	0.663186	15	15	0.682674		213	252	93	-0.808822	0.418618	-0.808822	0.418618	15	15	0.436289		218	247	98
2399.45	4167.63	0.297493	200	235	95	-0.436436	0.662521	-0.436436	0.662521	14	15	0.682954		239	226	106	0.269607	0.787462	0.269607	0.787462	15	15	0.806334		222	243	102	-0.43552	0.663186	-0.43552	0.663186	15	15	0.682674		213	252	93	-0.808822	0.418618	-0.808822	0.418618	15	15	0.436289		218	247	98
2401.38	4164.28	0.297733	200	235	95	-0.436436	0.662521	-0.436436	0.662521	14	15	0.682954		239	226	106	0.269607	0.787462	0.269607	0.787462	15	15	0.806334		222	243	102	-0.43552	0.663186	-0.43552	0.663186	15	15	0.682674		212	253	92	-0.8503	0.395159	-0.8503	0.395159	15	15	0.412376		218	247	98
2403.3	4160.94	0.297972	200	235	95	-0.436436	0.662521	-0.436436	0.662521	14	15	0.682954		239	226	106	0.269607	0.787462	0.269607	0.787462	15	15	0.806334		222	243	102	-0.43552	0.663186	-0.43552	0.663186	15	15	0.682674		212	253	92	-0.8503	0.395159	-0.8503	0.395159	15	15	0.412376		219	246	99
2405.23	4157.6	0.298211	199	236	94	-0.480079	0.631171	-0.480079	0.631171	14	15	0.651619		239	226	106	0.269607	0.787462	0.269607	0.787462	15	15	0.806334		221	244	101	-0.476998	0.633364	-0.476998	0.633364	15	15	0.65287		212	253	92	-0.8503	0.395159	-0.8503	0.395159	15	15	0.412376		219	246	99
2407.16	4154.27	0.29845	200	235	95	-0.436436	0.662521	-0.436436	0.662521	14	15	0.682954		239	226	106	0.269607	0.787462	0.269607	0.787462	15	15	0.806334		221	244	101	-0.476998	0.633364	-0.476998	0.633364	15	15	0.65287		212	253	92	-0.8503	0.395159	-0.8503	0.395159	15	15	0.412376		219	246	99
2409.09	4150.94	0.298689	200	235	95	-0.436436	0.662521	-0.436436	0.662521	14	15	0.682954		239	226	106	0.269607	0.787462	0.269607	0.787462	15	15	0.806334		221	244	101	-0.476998	0.633364	-0.476998	0.633364	15	15	0.65287		212	253	92	-0.8503	0.395159	-0.8503	0.395159	15	15	0.412376		218	247	98
2411.02	4147.62	0.298928	200	235	95	-0.436436	0.662521	-0.436436	0.662521	14	15	0.682954		239	226	106	0.269607	0.787462	0.269607	0.787462	15	15	0.806334		221	244	101	-0.476998	0.633364	-0.476998	0.633364	15	15	0.65287		212	253	92	-0.8503	0.395159	-0.8503	0.395159	15	15	0.412376		218	247	98
2412.95	4144.31	0.299167	199	236	94	-0.480079	0.631171	-0.480079	0.631171	14	15	0.651619		239	226	106	0.269607	0.787462	0.269607	0.787462	15	15	0.806334		221	244	101	-0.476998	0.633364	-0.476998	0.633364	15	15	0.65287		212	253	92	-0.8503	0.395159	-0.8503	0.395159	15	15	0.412376		219	246	99
2414.88	4141	0.299407	199	236	94	-0.480079	0.631171	-0.480079	0.631171	14	15	0.651619		239	226	106	0.269607	0.787462	0.269607	0.787462	15	15	0.806334		221	244	101	-0.476998	0.633364	-0.476998	0.633364	15	15	0.65287		212	253	92	-0.8503	0.395159	-0.8503	0.395159	15	15	0.412376		218	247	98
2416.81	4137.69	0.299646	199	236	94	-0.480079	0.631171	-0.480079	0.631171	14	15	0.651619		239	226	106	0.269607	0.787462	0.269607	0.787462	15	15	0.806334		221	244	101	-0.476998	0.633364	-0.476998	0.633364	15	15	0.65287		211	254	91	-0.891778	0.372512	-0.891778	0.372512	15	15	0.389233		219	246	99
2418.74	4134.39	0.299885	199	236	94	-0.480079	0.631171	-0.480079	0.631171	14	15	0.651619		239	226	106	0.269607	0.787462	0.269607	0.787462	15	15	0.806334		221	244	101	-0.476998	0.633364	-0.476998	0.633364	15	15	0.65287		211	254	91	-0.891778	0.372512	-0.891778	0.372512	15	15	0.389233		218	247	98
2420.66	4131.1	0.300124	200	235	95	-0.436436	0.662521	-0.436436	0.662521	14	15	0.682954		239	226	106	0.269607	0.787462	0.269607	0.787462	15	15	0.806334		220	245	100	-0.518476	0.604127	-0.518476	0.604127	15	15	0.623594		211	254	91	-0.891778	0.372512	-0.891778	0.372512	15	15	0.389233		218	247	98
2422.59	4127.81	0.300363	199	236	94	-0.480079	0.631171	-0.480079	0.631171	14	15	0.651619		238	227	107	0.228129	0.819546	0.228129	0.819546	15	15	0.838135		220	245	100	-0.518476	0.604127	-0.518476	0.604127	15	15	0.623594		210	255	90	-0.933257	0.350688	-0.933257	0.350688	15	15	0.366875		218	247	98
2424.52	4124.52	0.300602	199	236	94	-0.480079	0.631171	-0.480079	0.631171	14	15	0.651619		238	227	107	0.228129	0.819546	0.228129	0.819546	15	15	0.838135		220	245	100	-0.518476	0.604127	-0.518476	0.604127	15	15	0.623594		211	254	91	-0.891778	0.372512	-0.891778	0.372512	15	15	0.389233		217	248	97
2426.45	4121.25	0.300841	199	236	94	-0.480079	0.631171	-0.480079	0.631171	14	15	0.651619		238	227	107	0.228129	0.819546	0.228129	0.819546	15	15	0.838135		220	245	100	-0.518476	0.604127	-0.518476	0.604127	15	15	0.623594		211	254	91	-0.891778	0.372512	-0.891778	0.372512	15	15	0.389233		217	248	97
2428.38	4117.97	0.301081	201	234	96	-0.392792	0.694473	-0.392792	0.694473	14	15	0.71483		238	227	107	0.228129	0.819546	0.228129	0.819546	15	15	0.838135		220	245	100	-0.518476	0.604127	-0.518476	0.604127	15	15	0.623594		211	254	91	-0.891778	0.372512	-0.891778	0.372512	15	15	0.389233		216	249	96
2430.31	4114.7	0.30132	201	234	96	-0.392792	0.694473	-0.392792	0.694473	14	15	0.71483		237	228	108	0.186651	0.851934	0.186651	0.851934	15	15	0.870194		220	245	100	-0.518476	0.604127	-0.518476	0.604127	15	15	0.623594		210	255	90	-0.933257	0.350688	-0.933257	0.350688	15	15	0.366875		216	249	96
2432.24	4111.44	0.301559	201	234	96	-0.392792	0.694473	-0.392792	0.694473	14	15	0.71483		237	228	108	0.186651	0.851934	0.186651	0.851934	15	15	0.870194		220	245	100	-0.518476	0.604127	-0.518476	0.604127	15	15	0.623594		210	255	90	-0.933257	0.350688	-0.933257	0.350688	15	15	0.366875		217	248	97
2434.17	4108.18	0.301798	202	233	97	-0.349149	0.726978	-0.349149	0.726978	14	15	0.747192		238	227	107	0.228129	0.819546	0.228129	0.819546	15	15	0.838135		219	246	99	-0.559954	0.575511	-0.559954	0.575511	15	15	0.594884		210	255	90	-0.933257	0.350688	-0.933257	0.350688	15	15	0.366875		217	248	97
2436.09	4104.93	0.302037	202	233	97	-0.349149	0.726978	-0.349149	0.726978	14	15	0.747192		238	227	107	0.228129	0.819546	0.228129	0.819546	15	15	0.838135		219	246	99	-0.559954	0.575511	-0.559954	0.575511	15	15	0.594884		210	255	90	-0.933257	0.350688	-0.933257	0.350688	15	15	0.366875		216	249	96
2438.02	4101.68	0.302276	202	233	97	-0.349149	0.726978	-0.349149	0.726978	14	15	0.747192		238	227	107	0.228129	0.819546	0.228129	0.819546	15	15	0.838135		219	246	99	-0.559954	0.575511	-0.559954	0.575511	15	15	0.594884		210	255	90	-0.933257	0.350688	-0.933257	0.350688	15	15	0.366875		215	250	95
2439.95	4098.44	0.302515	202	233	97	-0.349149	0.726978	-0.349149	0.726978	14	15	0.747192		238	227	107	0.228129	0.819546	0.228129	0.819546	15	15	0.838135		219	246	99	-0.559954	0.575511	-0.559954	0.575511	15	15	0.594884		210	255	90	-0.933257	0.350688	-0.933257	0.350688	15	15	0.366875		215	250	95
2441.88	4095.2	0.302755	201	234	96	-0.392792	0.694473	-0.392792	0.694473	14	15	0.71483		238	227	107	0.228129	0.819546	0.228129	0.819546	15	15	0.838135		219	246	99	-0.559954	0.575511	-0.559954	0.575511	15	15	0.594884		210	255	90	-0.933257	0.350688	-0.933257	0.350688	15	15	0.366875		215	250	95
2443.81	4091.97	0.302994	202	233	97	-0.349149	0.726978	-0.349149	0.726978	14	15	0.747192		238	227	107	0.228129	0.819546	0.228129	0.819546	15	15	0.838135		219	246	99	-0.559954	0.575511	-0.559954	0.575511	15	15	0.594884		210	255	90	-0.933257	0.350688	-0.933257	0.350688	15	15	0.366875		215	250	95
2445.74	4088.74	0.303233	202	233	97	-0.349149	0.726978	-0.349149	0.726978	14	15	0.747192		238	227	107	0.228129	0.819546	0.228129	0.819546	15	15	0.838135		219	246	99	-0.559954	0.575511	-0.559954	0.575511	15	15	0.594884		210	255	90	-0.933257	0.350688	-0.933257	0.350688	15	15	0.366875		215	250	95
2447.67	4085.52	0.303472	201	234	96	-0.392792	0.694473	-0.392792	0.694473	14	15	0.71483		238	227	107	0.228129	0.819546	0.228129	0.819546	15	15	0.838135		219	246	99	-0.559954	0.575511	-0.559954	0.575511	15	15	0.594884		210	255	90	-0.933257	0.350688	-0.933257	0.350688	15	15	0.366875		215	250	95
2449.6	4082.31	0.303711	201	234	96	-0.392792	0.694473	-0.392792	0.694473	14	15	0.71483		238	227	107	0.228129	0.819546	0.228129	0.819546	15	15	0.838135		219	246	99	-0.559954	0.575511	-0.559954	0.575511	15	15	0.594884		209	256	89	-0.974735	0.329693	-0.974735	0.329693	15	15	0.345311		215	250	95
2451.53	4079.09	0.30395	201	234	96	-0.392792	0.694473	-0.392792	0.694473	14	15	0.71483		238	227	107	0.228129	0.819546	0.228129	0.819546	15	15	0.838135		219	246	99	-0.559954	0.575511	-0.559954	0.575511	15	15	0.594884		210	255	90	-0.933257	0.350688	-0.933257	0.350688	15	15	0.366875		215	250	95
2453.45	4075.89	0.304189	201	234	96	-0.392792	0.694473	-0.392792	0.694473	14	15	0.71483		238	227	107	0.228129	0.819546	0.228129	0.819546	15	15	0.838135		219	246	99	-0.559954	0.575511	-0.559954	0.575511	15	15	0.594884		210	255	90	-0.933257	0.350688	-0.933257	0.350688	15	15	0.366875		216	249	96
2455.38	4072.68	0.304429	202	233	97	-0.349149	0.726978	-0.349149	0.726978	14	15	0.747192		238	227	107	0.228129	0.819546	0.228129	0.819546	15	15	0.838135		219	246	99	-0.559954	0.575511	-0.559954	0.575511	15	15	0.594884		210	255	90	-0.933257	0.350688	-0.933257	0.350688	15	15	0.366875		216	249	96
2457.31	4069.49	0.304668	202	233	97	-0.349149	0.726978	-0.349149	0.726978	14	15	0.747192		238	227	107	0.228129	0.819546	0.228129	0.819546	15	15	0.838135		220	245	100	-0.518476	0.604127	-0.518476	0.604127	15	15	0.623594		210	255	90	-0.933257	0.350688	-0.933257	0.350688	15	15	0.366875		215	250	95
2459.24	4066.3	0.304907	201	234	96	-0.392792	0.694473	-0.392792	0.694473	14	15	0.71483		238	227	107	0.228129	0.819546	0.228129	0.819546	15	15	0.838135		219	246	99	-0.559954	0.575511	-0.559954	0.575511	15	15	0.594884		209	256	89	-0.974735	0.329693	-0.974735	0.329693	15	15	0.345311		215	250	95
2461.17	4063.11	0.305146	202	233	97	-0.349149	0.726978	-0.349149	0.726978	14	15	0.747192		238	227	107	0.228129	0.819546	0.228129	0.819546	15	15	0.838135		219	246	99	-0.559954	0.575511	-0.559954	0.575511	15	15	0.594884		209	256	89	-0.974735	0.329693	-0.974735	0.329693	15	15	0.345311		214	251	94
2463.1	4059.93	0.305385	202	233	97	-0.349149	0.726978	-0.349149	0.726978	14	15	0.747192		238	227	107	0.228129	0.819546	0.228129	0.819546	15	15	0.838135		220	245	100	-0.518476	0.604127	-0.518476	0.604127	15	15	0.623594		209	256	89	-0.974735	0.329693	-0.974735	0.329693	15	15	0.345311		214	251	94
2465.03	4056.75	0.305624	201	234	96	-0.392792	0.694473	-0.392792	0.694473	14	15	0.71483		238	227	107	0.228129	0.819546	0.228129	0.819546	15	15	0.838135		220	245	100	-0.518476	0.604127	-0.518476	0.604127	15	15	0.623594		209	256	89	-0.974735	0.329693	-0.974735	0.329693	15	15	0.345311		214	251	94
2466.96	4053.58	0.305863	201	234	96	-0.392792	0.694473	-0.392792	0.694473	14	15	0.71483		238	227	107	0.228129	0.819546	0.228129	0.819546	15	15	0.838135		220	245	100	-0.518476	0.604127	-0.518476	0.604127	15	15	0.623594		209	256	89	-0.974735	0.329693	-0.974735	0.329693	15	15	0.345311		214	251	94
2468.88	4050.41	0.306103	201	234	96	-0.392792	0.694473	-0.392792	0.694473	14	15	0.71483		238	227	107	0.228129	0.819546	0.228129	0.819546	15	15	0.838135		220	245	100	-0.518476	0.604127	-0.518476	0.604127	15	15	0.623594		209	256	89	-0.974735	0.329693	-0.974735	0.329693	15	15	0.345311		214	251	94
2470.81	4047.25	0.306342	202	233	97	-0.349149	0.726978	-0.349149	0.726978	14	15	0.747192		239	226	106	0.269607	0.787462	0.269607	0.787462	15	15	0.806334		220	245	100	-0.518476	0.604127	-0.518476	0.604127	15	15	0.623594		210	255	90	-0.933257	0.350688	-0.933257	0.350688	15	15	0.366875		214	251	94
2472.74	4044.09	0.306581	202	233	97	-0.349149	0.726978	-0.349149	0.726978	14	15	0.747192		238	227	107	0.228129	0.819546	0.228129	0.819546	15	15	0.838135		220	245	100	-0.518476	0.604127	-0.518476	0.604127	15	15	0.623594		210	255	90	-0.933257	0.350688	-0.933257	0.350688	15	15	0.366875		213	252	93
2474.67	4040.94	0.30682	204	231	99	-0.261861	0.793428	-0.261861	0.793428	14	15	0.813179		238	227	107	0.228129	0.819546	0.228129	0.819546	15	15	0.838135		220	245	100	-0.518476	0.604127	-0.518476	0.604127	15	15	0.623594		210	255	90	-0.933257	0.350688	-0.933257	0.350688	15	15	0.366875		213	252	93
2476.6	4037.79	0.307059	203	232	98	-0.305505	0.759982	-0.305505	0.759982	14	15	0.779995		237	228	108	0.186651	0.851934	0.186651	0.851934	15	15	0.870194		220	245	100	-0.518476	0.604127	-0.518476	0.604127	15	15	0.623594		210	255	90	-0.933257	0.350688	-0.933257	0.350688	15	15	0.366875		213	252	93
2478.53	4034.65	0.307298	203	232	98	-0.305505	0.759982	-0.305505	0.759982	14	15	0.779995		238	227	107	0.228129	0.819546	0.228129	0.819546	15	15	0.838135		220	245	100	-0.518476	0.604127	-0.518476	0.604127	15	15	0.623594		210	255	90	-0.933257	0.350688	-0.933257	0.350688	15	15	0.366875		213	252	93
2480.46	4031.51	0.307537	203	232	98	-0.305505	0.759982	-0.305505	0.759982	14	15	0.779995		237	228	108	0.186651	0.851934	0.186651	0.851934	15	15	0.870194		220	245	100	-0.518476	0.604127	-0.518476	0.604127	15	15	0.623594		210	255	90	-0.933257	0.350688	-0.933257	0.350688	15	15	0.366875		214	251	94
2482.39	4028.38	0.307777	203	232	98	-0.305505	0.759982	-0.305505	0.759982	14	15	0.779995		238	227	107	0.228129	0.819546	0.228129	0.819546	15	15	0.838135		220	245	100	-0.518476	0.604127	-0.518476	0.604127	15	15	0.623594		209	256	89	-0.974735	0.329693	-0.974735	0.329693	15	15	0.345311		215	250	95
2484.32	4025.25	0.308016	202	233	97	-0.349149	0.726978	-0.349149	0.726978	14	15	0.747192		237	228	108	0.186651	0.851934	0.186651	0.851934	15	15	0.870194		220	245	100	-0.518476	0.604127	-0.518476	0.604127	15	15	0.623594		209	256	89	-0.974735	0.329693	-0.974735	0.329693	15	15	0.345311		213	252	93
2486.24	4022.13	0.308255	202	233	97	-0.349149	0.726978	-0.349149	0.726978	14	15	0.747192		237	228	108	0.186651	0.851934	0.186651	0.851934	15	15	0.870194		220	245	100	-0.518476	0.604127	-0.518476	0.604127	15	15	0.623594		209	256	89	-0.974735	0.329693	-0.974735	0.329693	15	15	0.345311		213	252	93
2488.17	4019.01	0.308494	202	233	97	-0.349149	0.726978	-0.349149	0.726978	14	15	0.747192		236	229	109	0.145173	0.884574	0.145173	0.884574	15	15	0.902462		220	245	100	-0.518476	0.604127	-0.518476	0.604127	15	15	0.623594		210	255	90	-0.933257	0.350688	-0.933257	0.350688	15	15	0.366875		212	253	92
2490.1	4015.9	0.308733	203	232	98	-0.305505	0.759982	-0.305505	0.759982	14	15	0.779995		236	229	109	0.145173	0.884574	0.145173	0.884574	15	15	0.902462		220	245	100	-0.518476	0.604127	-0.518476	0.604127	15	15	0.623594		210	255	90	-0.933257	0.350688	-0.933257	0.350688	15	15	0.366875		212	253	92
2492.03	4012.79	0.308972	203	232	98	-0.305505	0.759982	-0.305505	0.759982	14	15	0.779995		236	229	109	0.145173	0.884574	0.145173	0.884574	15	15	0.902462		220	245	100	-0.518476	0.604127	-0.518476	0.604127	15	15	0.623594		210	255	90	-0.933257	0.350688	-0.933257	0.350688	15	15	0.366875		213	252	93
2493.96	4009.69	0.309211	203	232	98	-0.305505	0.759982	-0.305505	0.759982	14	15	0.779995		235	230	110	0.103695	0.917411	0.103695	0.917411	15	15	0.934887		220	245	100	-0.518476	0.604127	-0.518476	0.604127	15	15	0.623594		210	255	90	-0.933257	0.350688	-0.933257	0.350688	15	15	0.366875		211	254	91
2495.89	4006.59	0.309451	203	232	98	-0.305505	0.759982	-0.305505	0.759982	14	15	0.779995		236	229	109	0.145173	0.884574	0.145173	0.884574	15	15	0.902462		220	245	100	-0.518476	0.604127	-0.518476	0.604127	15	15	0.623594		209	256	89	-0.974735	0.329693	-0.974735	0.329693	15	15	0.345311		210	255	90
2497.82	4003.5	0.30969	203	232	98	-0.305505	0.759982	-0.305505	0.759982	14	15	0.779995		236	229	109	0.145173	0.884574	0.145173	0.884574	15	15	0.902462		220	245	100	-0.518476	0.604127	-0.518476	0.604127	15	15	0.623594		209	256	89	-0.974735	0.329693	-0.974735	0.329693	15	15	0.345311		209	256	89
2499.75	4000.41	0.309929	202	233	97	-0.349149	0.726978	-0.349149	0.726978	14	15	0.747192		235	230	110	0.103695	0.917411	0.103695	0.917411	15	15	0.934887		220	245	100	-0.518476	0.604127	-0.518476	0.604127	15	15	0.623594		209	256	89	-0.974735	0.329693	-0.974735	0.329693	15	15	0.345311		209	256	89
2501.67	3997.32	0.310168	202	233	97	-0.349149	0.726978	-0.349149	0.726978	14	15	0.747192		235	230	110	0.103695	0.917411	0.103695	0.917411	15	15	0.934887		220	245	100	-0.518476	0.604127	-0.518476	0.604127	15	15	0.623594		210	255	90	-0.933257	0.350688	-0.933257	0.350688	15	15	0.366875		210	255	90
2503.6	3994.24	0.310407	202	233	97	-0.349149	0.726978	-0.349149	0.726978	14	15	0.747192		236	229	109	0.145173	0.884574	0.145173	0.884574	15	15	0.902462		220	245	100	-0.518476	0.604127	-0.518476	0.604127	15	15	0.623594		210	255	90	-0.933257	0.350688	-0.933257	0.350688	15	15	0.366875		211	254	91
2505.53	3991.17	0.310646	202	233	97	-0.349149	0.726978	-0.349149	0.726978	14	15	0.747192		235	230	110	0.103695	0.917411	0.103695	0.917411	15	15	0.934887		220	245	100	-0.518476	0.604127	-0.518476	0.604127	15	15	0.623594		210	255	90	-0.933257	0.350688	-0.933257	0.350688	15	15	0.366875		210	255	90
2507.46	3988.1	0.310885	204	231	99	-0.261861	0.793428	-0.261861	0.793428	14	15	0.813179		235	230	110	0.103695	0.917411	0.103695	0.917411	15	15	0.934887		220	245	100	-0.518476	0.604127	-0.518476	0.604127	15	15	0.623594		210	255	90	-0.933257	0.350688	-0.933257	0.350688	15	15	0.366875		210	255	90
2509.39	3985.03	0.311125	203	232	98	-0.305505	0.759982	-0.305505	0.759982	14	15	0.779995		235	230	110	0.103695	0.917411	0.103695	0.917411	15	15	0.934887		220	245	100	-0.518476	0.604127	-0.518476	0.604127	15	15	0.623594		210	255	90	-0.933257	0.350688	-0.933257	0.350688	15	15	0.366875		210	255	90
2511.32	3981.97	0.311364	204	231	99	-0.261861	0.793428	-0.261861	0.793428	14	15	0.813179		236	229	109	0.145173	0.884574	0.145173	0.884574	15	15	0.902462		220	245	100	-0.518476	0.604127	-0.518476	0.604127	15	15	0.623594		210	255	90	-0.933257	0.350688	-0.933257	0.350688	15	15	0.366875		210	255	90
2513.25	3978.92	0.311603	203	232	98	-0.305505	0.759982	-0.305505	0.759982	14	15	0.779995		236	229	109	0.145173	0.884574	0.145173	0.884574	15	15	0.902462		220	245	100	-0.518476	0.604127	-0.518476	0.604127	15	15	0.623594		210	255	90	-0.933257	0.350688	-0.933257	0.350688	15	15	0.366875		210	255	90
2515.18	3975.86	0.311842	204	231	99	-0.261861	0.793428	-0.261861	0.793428	14	15	0.813179		236	229	109	0.145173	0.884574	0.145173	0.884574	15	15	0.902462		220	245	100	-0.518476	0.604127	-0.518476	0.604127	15	15	0.623594		210	255	90	-0.933257	0.350688	-0.933257	0.350688	15	15	0.366875		211	254	91
2517.1	3972.82	0.312081	204	231	99	-0.261861	0.793428	-0.261861	0.793428	14	15	0.813179		236	229	109	0.145173	0.884574	0.145173	0.884574	15	15	0.902462		220	245	100	-0.518476	0.604127	-0.518476	0.604127	15	15	0.623594		209	256	89	-0.974735	0.329693	-0.974735	0.329693	15	15	0.345311		211	254	91
2519.03	3969.78	0.31232	205	230	100	-0.218218	0.827259	-0.218218	0.827259	14	15	0.846694		236	229	109	0.145173	0.884574	0.145173	0.884574	15	15	0.902462		219	246	99	-0.559954	0.575511	-0.559954	0.575511	15	15	0.594884		209	256	89	-0.974735	0.329693	-0.974735	0.329693	15	15	0.345311		210	255	90
2520.96	3966.74	0.312559	205	230	100	-0.218218	0.827259	-0.218218	0.827259	14	15	0.846694		236	229	109	0.145173	0.884574	0.145173	0.884574	15	15	0.902462		219	246	99	-0.559954	0.575511	-0.559954	0.575511	15	15	0.594884		209	256	89	-0.974735	0.329693	-0.974735	0.329693	15	15	0.345311		210	255	90
2522.89	3963.71	0.312799	205	230	100	-0.218218	0.827259	-0.218218	0.827259	14	15	0.846694		236	229	109	0.145173	0.884574	0.145173	0.884574	15	15	0.902462		219	246	99	-0.559954	0.575511	-0.559954	0.575511	15	15	0.594884		209	256	89	-0.974735	0.329693	-0.974735	0.329693	15	15	0.345311		209	256	89
2524.82	3960.68	0.313038	204	231	99	-0.261861	0.793428	-0.261861	0.793428	14	15	0.813179		235	230	110	0.103695	0.917411	0.103695	0.917411	15	15	0.934887		219	246	99	-0.559954	0.575511	-0.559954	0.575511	15	15	0.594884		209	256	89	-0.974735	0.329693	-0.974735	0.329693	15	15	0.345311		211	254	91
2526.75	3957.65	0.313277	205	230	100	-0.218218	0.827259	-0.218218	0.827259	14	15	0.846694		234	231	111	0.0622171	0.95039	0.0622171	0.95039	15	15	0.967417		219	246	99	-0.559954	0.575511	-0.559954	0.575511	15	15	0.594884		209	256	89	-0.974735	0.329693	-0.974735	0.329693	15	15	0.345311		210	255	90
2528.68	3954.64	0.313516	206	229	101	-0.174574	0.861414	-0.174574	0.861414	14	15	0.880478		234	231	111	0.0622171	0.95039	0.0622171	0.95039	15	15	0.967417		219	246	99	-0.559954	0.575511	-0.559954	0.575511	15	15	0.594884		210	255	90	-0.933257	0.350688	-0.933257	0.350688	15	15	0.366875		210	255	90
2530.61	3951.62	0.313755	205	230	100	-0.218218	0.827259	-0.218218	0.827259	14	15	0.846694		234	231	111	0.0622171	0.95039	0.0622171	0.95039	15	15	0.967417		219	246	99	-0.559954	0.575511	-0.559954	0.575511	15	15	0.594884		210	255	90	-0.933257	0.350688	-0.933257	0.350688	15	15	0.366875		210	255	90
2532.54	3948.61	0.313994	206	229	101	-0.174574	0.861414	-0.174574	0.861414	14	15	0.880478		235	230	110	0.103695	0.917411	0.103695	0.917411	15	15	0.934887		219	246	99	-0.559954	0.575511	-0.559954	0.575511	15	15	0.594884		209	256	89	-0.974735	0.329693	-0.974735	0.329693	15	15	0.345311		210	255	90
2534.46	3945.61	0.314233	206	229	101	-0.174574	0.861414	-0.174574	0.861414	14	15	0.880478		234	231	111	0.0622171	0.95039	0.0622171	0.95039	15	15	0.967417		219	246	99	-0.559954	0.575511	-0.559954	0.575511	15	15	0.594884		209	256	89	-0.974735	0.329693	-0.974735	0.329693	15	15	0.345311		210	255	90
2536.39	3942.61	0.314473	205	230	100	-0.218218	0.827259	-0.218218	0.827259	14	15	0.846694		234	231	111	0.0622171	0.95039	0.0622171	0.95039	15	15	0.967417		219	246	99	-0.559954	0.575511	-0.559954	0.575511	15	15	0.594884		210	255	90	-0.933257	0.350688	-0.933257	0.350688	15	15	0.366875		209	256	89
2538.32	3939.61	0.314712	205	230	100	-0.218218	0.827259	-0.218218	0.827259	14	15	0.846694		233	232	112	0.020739	0.983454	0.020739	0.983454	15	15	1		219	246	99	-0.559954	0.575511	-0.559954	0.575511	15	15	0.594884		210	255	90	-0.933257	0.350688	-0.933257	0.350688	15	15	0.366875		209	256	89
2540.25	3936.62	0.314951	206	229	101	-0.174574	0.861414	-0.174574	0.861414	14	15	0.880478		234	231	111	0.0622171	0.95039	0.0622171	0.95039	15	15	0.967417		219	246	99	-0.559954	0.575511	-0.559954	0.575511	15	15	0.594884		211	254	91	-0.891778	0.372512	-0.891778	0.372512	15	15	0.389233		210	255	90
2542.18	3933.63	0.31519	206	229	101	-0.174574	0.861414	-0.174574	0.861414	14	15	0.880478		234	231	111	0.0622171	0.95039	0.0622171	0.95039	15	15	0.967417		219	246	99	-0.559954	0.575511	-0.559954	0.575511	15	15	0.594884		211	254	91	-0.891778	0.372512	-0.891778	0.372512	15	15	0.389233		209	256	89
2544.11	3930.65	0.315429	205	230	100	-0.218218	0.827259	-0.218218	0.827259	14	15	0.846694		233	232	112	0.020739	0.983454	0.020739	0.983454	15	15	1		218	247	98	-0.601432	0.547553	-0.601432	0.547553	15	15	0.566774		210	255	90	-0.933257	0.350688	-0.933257	0.350688	15	15	0.366875		209	256	89
2546.04	3927.67	0.315668	208	227	103	-0.0872872	0.930443	-0.0872872	0.930443	14	15	0.948623		233	232	112	0.020739	0.983454	0.020739	0.983454	15	15	1		218	247	98	-0.601432	0.547553	-0.601432	0.547553	15	15	0.566774		211	254	91	-0.891778	0.372512	-0.891778	0.372512	15	15	0.389233		208	257	88
2547.97	3924.7	0.315907	208	227	103	-0.0872872	0.930443	-0.0872872	0.930443	14	15	0.948623		233	232	112	0.020739	0.983454	0.020739	0.983454	15	15	1		218	247	98	-0.601432	0.547553	-0.601432	0.547553	15	15	0.566774		211	254	91	-0.891778	0.372512	-0.891778	0.372512	15	15	0.389233		208	257	88
2549.89	3921.73	0.316147	208	227	103	-0.0872872	0.930443	-0.0872872	0.930443	14	15	0.948623		233	232	112	0.020739	0.983454	0.020739	0.983454	15	15	1		218	247	98	-0.601432	0.547553	-0.601432	0.547553	15	15	0.566774		211	254	91	-0.891778	0.372512	-0.891778	0.372512	15	15	0.389233		209	256	89
2551.82	3918.77	0.316386	209	226	104	-0.0436436	0.965189	-0.0436436	0.965189	14	15	0.982865		233	232	112	0.020739	0.983454	0.020739	0.983454	15	15	1		218	247	98	-0.601432	0.547553	-0.601432	0.547553	15	15	0.566774		211	254	91	-0.891778	0.372512	-0.891778	0.372512	15	15	0.389233		209	256	89
2553.75	3915.81	0.316625	207	228	102	-0.130931	0.89583	-0.130931	0.89583	14	15	0.914475		233	232	112	0.020739	0.983454	0.020739	0.983454	15	15	1		218	247	98	-0.601432	0.547553	-0.601432	0.547553	15	15	0.566774		211	254	91	-0.891778	0.372512	-0.891778	0.372512	15	15	0.389233		209	256	89
2555.68	3912.85	0.316864	207	228	102	-0.130931	0.89583	-0.130931	0.89583	14	15	0.914475		234	231	111	0.0622171	0.95039	0.0622171	0.95039	15	15	0.967417		218	247	98	-0.601432	0.547553	-0.601432	0.547553	15	15	0.566774		210	255	90	-0.933257	0.350688	-0.933257	0.350688	15	15	0.366875		209	256	89
2557.61	3909.9	0.317103	210	225	105	0	1	0	1	14	15	1.01714		234	231	111	0.0622171	0.95039	0.0622171	0.95039	15	15	0.967417		219	246	99	-0.559954	0.575511	-0.559954	0.575511	15	15	0.594884		210	255	90	-0.933257	0.350688	-0.933257	0.350688	15	15	0.366875		209	256	89
2559.54	3906.95	0.317342	210	225	105	0	1	0	1	14	15	1.01714		234	231	111	0.0622171	0.95039	0.0622171	0.95039	15	15	0.967417		220	245	100	-0.518476	0.604127	-0.518476	0.604127	15	15	0.623594		211	254	91	-0.891778	0.372512	-0.891778	0.372512	15	15	0.389233		209	256	89
2561.47	3904.01	0.317581	210	225	105	0	1	0	1	14	15	1.01714		234	231	111	0.0622171	0.95039	0.0622171	0.95039	15	15	0.967417		220	245	100	-0.518476	0.604127	-0.518476	0.604127	15	15	0.623594		211	254	91	-0.891778	0.372512	-0.891778	0.372512	15	15	0.389233		209	256	89
2563.4	3901.07	0.317821	210	225	105	0	1	0	1	14	15	1.01714		234	231	111	0.0622171	0.95039	0.0622171	0.95039	15	15	0.967417		218	247	98	-0.601432	0.547553	-0.601432	0.547553	15	15	0.566774		211	254	91	-0.891778	0.372512	-0.891778	0.372512	15	15	0.389233		209	256	89
2565.33	3898.14	0.31806	210	225	105	0	1	0	1	14	15	1.01714		234	231	111	0.0622171	0.95039	0.0622171	0.95039	15	15	0.967417		219	246	99	-0.559954	0.575511	-0.559954	0.575511	15	15	0.594884		211	254	91	-0.891778	0.372512	-0.891778	0.372512	15	15	0.389233		209	256	89
2567.25	3895.21	0.318299	210	225	105	0	1	0	1	14	15	1.01714		234	231	111	0.0622171	0.95039	0.0622171	0.95039	15	15	0.967417		219	246	99	-0.559954	0.575511	-0.559954	0.575511	15	15	0.594884		211	254	91	-0.891778	0.372512	-0.891778	0.372512	15	15	0.389233		209	256	89
2569.18	3892.29	0.318538	210	225	105	0	1	0	1	14	15	1.01714		234	231	111	0.0622171	0.95039	0.0622171	0.95039	15	15	0.967417		219	246	99	-0.559954	0.575511	-0.559954	0.575511	15	15	0.594884		211	254	91	-0.891778	0.372512	-0.891778	0.372512	15	15	0.389233		210	255	90
2571.11	3889.37	0.318777	210	225	105	0	1	0	1	14	15	1.01714		234	231	111	0.0622171	0.95039	0.0622171	0.95039	15	15	0.967417		220	245	100	-0.518476	0.604127	-0.518476	0.604127	15	15	0.623594		211	254	91	-0.891778	0.372512	-0.891778	0.372512	15	15	0.389233		210	255	90
2573.04	3886.45	0.319016	210	225	105	0	1	0	1	14	15	1.01714		234	231	111	0.0622171	0.95039	0.0622171	0.95039	15	15	0.967417		220	245	100	-0.518476	0.604127	-0.518476	0.604127	15	15	0.623594		210	255	90	-0.933257	0.350688	-0.933257	0.350688	15	15	0.366875		210	255	90
2574.97	3883.54	0.319255	210	225	105	0	1	0	1	14	15	1.01714		235	230	110	0.103695	0.917411	0.103695	0.917411	15	15	0.934887		219	246	99	-0.559954	0.575511	-0.559954	0.575511	15	15	0.594884		211	254	91	-0.891778	0.372512	-0.891778	0.372512	15	15	0.389233		211	254	91
2576.9	3880.63	0.319495	210	225	105	0	1	0	1	14	15	1.01714		235	230	110	0.103695	0.917411	0.103695	0.917411	15	15	0.934887		218	247	98	-0.601432	0.547553	-0.601432	0.547553	15	15	0.566774		211	254	91	-0.891778	0.372512	-0.891778	0.372512	15	15	0.389233		211	254	91
2578.83	3877.73	0.319734	210	225	105	0	1	0	1	14	15	1.01714		235	230	110	0.103695	0.917411	0.103695	0.917411	15	15	0.934887		218	247	98	-0.601432	0.547553	-0.601432	0.547553	15	15	0.566774		211	254	91	-0.891778	0.372512	-0.891778	0.372512	15	15	0.389233		211	254	91
2580.76	3874.83	0.319973	210	225	105	0	1	0	1	14	15	1.01714		235	230	110	0.103695	0.917411	0.103695	0.917411	15	15	0.934887		218	247	98	-0.601432	0.547553	-0.601432	0.547553	15	15	0.566774		211	254	91	-0.891778	0.372512	-0.891778	0.372512	15	15	0.389233		211	254	91
2582.68	3871.94	0.320212	210	225	105	0	1	0	1	14	15	1.01714		236	229	109	0.145173	0.884574	0.145173	0.884574	15	15	0.902462		218	247	98	-0.601432	0.547553	-0.601432	0.547553	15	15	0.566774		211	254	91	-0.891778	0.372512	-0.891778	0.372512	15	15	0.389233		211	254	91
2584.61	3869.05	0.320451	210	225	105	0	1	0	1	14	15	1.01714		236	229	109	0.145173	0.884574	0.145173	0.884574	15	15	0.902462		218	247	98	-0.601432	0.547553	-0.601432	0.547553	15	15	0.566774		211	254	91	-0.891778	0.372512	-0.891778	0.372512	15	15	0.389233		211	254	91
2586.54	3866.17	0.32069	210	225	105	0	1	0	1	14	15	1.01714		236	229	109	0.145173	0.884574	0.145173	0.884574	15	15	0.902462		218	247	98	-0.601432	0.547553	-0.601432	0.547553	15	15	0.566774		211	254	91	-0.891778	0.372512	-0.891778	0.372512	15	15	0.389233		211	254	91
2588.47	3863.28	0.320929	211	224	104	0.0436436	0.965189	0.0436436	0.965189	14	15	0.982865		236	229	109	0.145173	0.884574	0.145173	0.884574	15	15	0.902462		218	247	98	-0.601432	0.547553	-0.601432	0.547553	15	15	0.566774		212	253	92	-0.8503	0.395159	-0.8503	0.395159	15	15	0.412376		212	253	92
2590.4	3860.41	0.321169	212	223	103	0.0872872	0.930443	0.0872872	0.930443	14	15	0.948623		236	229	109	0.145173	0.884574	0.145173	0.884574	15	15	0.902462		218	247	98	-0.601432	0.547553	-0.601432	0.547553	15	15	0.566774		214	251	94	-0.767344	0.442877	-0.767344	0.442877	15	15	0.460959		212	253	92
2592.33	3857.54	0.321408	211	224	104	0.0436436	0.965189	0.0436436	0.965189	14	15	0.982865		236	229	109	0.145173	0.884574	0.145173	0.884574	15	15	0.902462		217	248	97	-0.64291	0.520283	-0.64291	0.520283	15	15	0.539299		213	252	93	-0.808822	0.418618	-0.808822	0.418618	15	15	0.436289		212	253	92
2594.26	3854.67	0.321647	211	224	104	0.0436436	0.965189	0.0436436	0.965189	14	15	0.982865		237	228	108	0.186651	0.851934	0.186651	0.851934	15	15	0.870194		217	248	97	-0.64291	0.520283	-0.64291	0.520283	15	15	0.539299		214	251	94	-0.767344	0.442877	-0.767344	0.442877	15	15	0.460959		212	253	92
2596.19	3851.8	0.321886	211	224	104	0.0436436	0.965189	0.0436436	0.965189	14	15	0.982865		237	228	108	0.186651	0.851934	0.186651	0.851934	15	15	0.870194		218	247	98	-0.601432	0.547553	-0.601432	0.547553	15	15	0.566774		215	250	95	-0.725866	0.467921	-0.725866	0.467921	15	15	0.486365		213	252	93
2598.12	3848.94	0.322125	212	223	103	0.0872872	0.930443	0.0872872	0.930443	14	15	0.948623		236	229	109	0.145173	0.884574	0.145173	0.884574	15	15	0.902462		218	247	98	-0.601432	0.547553	-0.601432	0.547553	15	15	0.566774		215	250	95	-0.725866	0.467921	-0.725866	0.467921	15	15	0.486365		213	252	93
2600.04	3846.09	0.322364	213	222	102	0.130931	0.89583	0.130931	0.89583	14	15	0.914475		235	230	110	0.103695	0.917411	0.103695	0.917411	15	15	0.934887		217	248	97	-0.64291	0.520283	-0.64291	0.520283	15	15	0.539299		216	249	96	-0.684388	0.493731	-0.684388	0.493731	15	15	0.512486		212	253	92
2601.97	3843.24	0.322603	212	223	103	0.0872872	0.930443	0.0872872	0.930443	14	15	0.948623		236	229	109	0.145173	0.884574	0.145173	0.884574	15	15	0.902462		217	248	97	-0.64291	0.520283	-0.64291	0.520283	15	15	0.539299		216	249	96	-0.684388	0.493731	-0.684388	0.493731	15	15	0.512486		212	253	92
2603.9	3840.39	0.322843	212	223	103	0.0872872	0.930443	0.0872872	0.930443	14	15	0.948623		237	228	108	0.186651	0.851934	0.186651	0.851934	15	15	0.870194		218	247	98	-0.601432	0.547553	-0.601432	0.547553	15	15	0.566774		216	249	96	-0.684388	0.493731	-0.684388	0.493731	15	15	0.512486		212	253	92
2605.83	3837.55	0.323082	213	222	102	0.130931	0.89583	0.130931	0.89583	14	15	0.914475		238	227	107	0.228129	0.819546	0.228129	0.819546	15	15	0.838135		218	247	98	-0.601432	0.547553	-0.601432	0.547553	15	15	0.566774		216	249	96	-0.684388	0.493731	-0.684388	0.493731	15	15	0.512486		212	253	92
2607.76	3834.71	0.323321	214	221	101	0.174574	0.861414	0.174574	0.861414	14	15	0.880478		238	227	107	0.228129	0.819546	0.228129	0.819546	15	15	0.838135		218	247	98	-0.601432	0.547553	-0.601432	0.547553	15	15	0.566774		216	249	96	-0.684388	0.493731	-0.684388	0.493731	15	15	0.512486		212	253	92
2609.69	3831.88	0.32356	214	221	101	0.174574	0.861414	0.174574	0.861414	14	15	0.880478		237	228	108	0.186651	0.851934	0.186651	0.851934	15	15	0.870194		218	247	98	-0.601432	0.547553	-0.601432	0.547553	15	15	0.566774		216	249	96	-0.684388	0.493731	-0.684388	0.493731	15	15	0.512486		213	252	93
2611.62	3829.05	0.323799	213	222	102	0.130931	0.89583	0.130931	0.89583	14	15	0.914475		237	228	108	0.186651	0.851934	0.186651	0.851934	15	15	0.870194		218	247	98	-0.601432	0.547553	-0.601432	0.547553	15	15	0.566774		215	250	95	-0.725866	0.467921	-0.725866	0.467921	15	15	0.486365		212	253	92
2613.55	3826.22	0.324038	212	223	103	0.0872872	0.930443	0.0872872	0.930443	14	15	0.948623		237	228	108	0.186651	0.851934	0.186651	0.851934	15	15	0.870194		218	247	98	-0.601432	0.547553	-0.601432	0.547553	15	15	0.566774		215	250	95	-0.725866	0.467921	-0.725866	0.467921	15	15	0.486365		212	253	92
2615.47	3823.4	0.324277	212	223	103	0.0872872	0.930443	0.0872872	0.930443	14	15	0.948623		237	228	108	0.186651	0.851934	0.186651	0.851934	15	15	0.870194		218	247	98	-0.601432	0.547553	-0.601432	0.547553	15	15	0.566774		216	249	96	-0.684388	0.493731	-0.684388	0.493731	15	15	0.512486		212	253	92
2617.4	3820.58	0.324517	214	221	101	0.174574	0.861414	0.174574	0.861414	14	15	0.880478		236	229	109	0.145173	0.884574	0.145173	0.884574	15	15	0.902462		218	247	98	-0.601432	0.547553	-0.601432	0.547553	15	15	0.566774		216	249	96	-0.684388	0.493731	-0.684388	0.493731	15	15	0.512486		212	253	92
2619.33	3817.77	0.324756	213	222	102	0.130931	0.89583	0.130931	0.89583	14	15	0.914475		237	228	108	0.186651	0.851934	0.186651	0.851934	15	15	0.870194		218	247	98	-0.601432	0.547553	-0.601432	0.547553	15	15	0.566774		215	250	95	-0.725866	0.467921	-0.725866	0.467921	15	15	0.486365		213	252	93
2621.26	3814.96	0.324995	214	221	101	0.174574	0.861414	0.174574	0.861414	14	15	0.880478		237	228	108	0.186651	0.851934	0.186651	0.851934	15	15	0.870194		218	247	98	-0.601432	0.547553	-0.601432	0.547553	15	15	0.566774		215	250	95	-0.725866	0.467921	-0.725866	0.467921	15	15	0.486365		213	252	93
2623.19	3812.15	0.325234	214	221	101	0.174574	0.861414	0.174574	0.861414	14	15	0.880478		237	228	108	0.186651	0.851934	0.186651	0.851934	15	15	0.870194		218	247	98	-0.601432	0.547553	-0.601432	0.547553	15	15	0.566774		216	249	96	-0.684388	0.493731	-0.684388	0.493731	15	15	0.512486		213	252	93
2625.12	3809.35	0.325473	214	221	101	0.174574	0.861414	0.174574	0.861414	14	15	0.880478		237	228	108	0.186651	0.851934	0.186651	0.851934	15	15	0.870194		218	247	98	-0.601432	0.547553	-0.601432	0.547553	15	15	0.566774		216	249	96	-0.684388	0.493731	-0.684388	0.493731	15	15	0.512486		213	252	93
2627.05	3806.55	0.325712	214	221	101	0.174574	0.861414	0.174574	0.861414	14	15	0.880478		237	228	108	0.186651	0.851934	0.186651	0.851934	15	15	0.870194		218	247	98	-0.601432	0.547553	-0.601432	0.547553	15	15	0.566774		215	250	95	-0.725866	0.467921	-0.725866	0.467921	15	15	0.486365		213	252	93
2628.98	3803.76	0.325951	214	221	101	0.174574	0.861414	0.174574	0.861414	14	15	0.880478		238	227	107	0.228129	0.819546	0.228129	0.819546	15	15	0.838135		218	247	98	-0.601432	0.547553	-0.601432	0.547553	15	15	0.566774		216	249	96	-0.684388	0.493731	-0.684388	0.493731	15	15	0.512486		213	252	93
2630.91	3800.97	0.326191	214	221	101	0.174574	0.861414	0.174574	0.861414	14	15	0.880478		237	228	108	0.186651	0.851934	0.186651	0.851934	15	15	0.870194		218	247	98	-0.601432	0.547553	-0.601432	0.547553	15	15	0.566774		217	248	97	-0.64291	0.520283	-0.64291	0.520283	15	15	0.539299		213	252	93
2632.83	3798.19	0.32643	214	221	101	0.174574	0.861414	0.174574	0.861414	14	15	0.880478		236	229	109	0.145173	0.884574	0.145173	0.884574	15	15	0.902462		218	247	98	-0.601432	0.547553	-0.601432	0.547553	15	15	0.566774		217	248	97	-0.64291	0.520283	-0.64291	0.520283	15	15	0.539299		213	252	93
2634.76	3795.41	0.326669	214	221	101	0.174574	0.861414	0.174574	0.861414	14	15	0.880478		236	229	109	0.145173	0.884574	0.145173	0.884574	15	15	0.902462		218	247	98	-0.601432	0.547553	-0.601432	0.547553	15	15	0.566774		217	248	97	-0.64291	0.520283	-0.64291	0.520283	15	15	0.539299		213	252	93
2636.69	3792.63	0.326908	215	220	100	0.218218	0.827259	0.218218	0.827259	14	15	0.846694		236	229	109	0.145173	0.884574	0.145173	0.884574	15	15	0.902462		218	247	98	-0.601432	0.547553	-0.601432	0.547553	15	15	0.566774		216	249	96	-0.684388	0.493731	-0.684388	0.493731	15	15	0.512486		213	252	93
2638.62	3789.86	0.327147	215	220	100	0.218218	0.827259	0.218218	0.827259	14	15	0.846694		236	229	109	0.145173	0.884574	0.145173	0.884574	15	15	0.902462		218	247	98	-0.601432	0.547553	-0.601432	0.547553	15	15	0.566774		218	247	98	-0.601432	0.547553	-0.601432	0.547553	15	15	0.566774		213	252	93
2640.55	3787.09	0.327386	215	220	100	0.218218	0.827259	0.218218	0.827259	14	15	0.846694		236	229	109	0.145173	0.884574	0.145173	0.884574	15	15	0.902462		218	247	98	-0.601432	0.547553	-0.601432	0.547553	15	15	0.566774		215	250	95	-0.725866	0.467921	-0.725866	0.467921	15	15	0.486365		213	252	93
2642.48	3784.33	0.327625	215	220	100	0.218218	0.827259	0.218218	0.827259	14	15	0.846694		236	229	109	0.145173	0.884574	0.145173	0.884574	15	15	0.902462		218	247	98	-0.601432	0.547553	-0.601432	0.547553	15	15	0.566774		215	250	95	-0.725866	0.467921	-0.725866	0.467921	15	15	0.486365		213	252	93
2644.41	3781.57	0.327865	215	220	100	0.218218	0.827259	0.218218	0.827259	14	15	0.846694		236	229	109	0.145173	0.884574	0.145173	0.884574	15	15	0.902462		218	247	98	-0.601432	0.547553	-0.601432	0.547553	15	15	0.566774		217	248	97	-0.64291	0.520283	-0.64291	0.520283	15	15	0.539299		213	252	93
2646.34	3778.81	0.328104	215	220	100	0.218218	0.827259	0.218218	0.827259	14	15	0.846694		236	229	109	0.145173	0.884574	0.145173	0.884574	15	15	0.902462		218	247	98	-0.601432	0.547553	-0.601432	0.547553	15	15	0.566774		219	246	99	-0.559954	0.575511	-0.559954	0.575511	15	15	0.594884		213	252	93
2648.26	3776.06	0.328343	215	220	100	0.218218	0.827259	0.218218	0.827259	14	15	0.846694		236	229	109	0.145173	0.884574	0.145173	0.884574	15	15	0.902462		218	247	98	-0.601432	0.547553	-0.601432	0.547553	15	15	0.566774		219	246	99	-0.559954	0.575511	-0.559954	0.575511	15	15	0.594884		213	252	93
2650.19	3773.31	0.328582	215	220	100	0.218218	0.827259	0.218218	0.827259	14	15	0.846694		236	229	109	0.145173	0.884574	0.145173	0.884574	15	15	0.902462		218	247	98	-0.601432	0.547553	-0.601432	0.547553	15	15	0.566774		217	248	97	-0.64291	0.520283	-0.64291	0.520283	15	15	0.539299		214	251	94
2652.12	3770.57	0.328821	215	220	100	0.218218	0.827259	0.218218	0.827259	14	15	0.846694		236	229	109	0.145173	0.884574	0.145173	0.884574	15	15	0.902462		218	247	98	-0.601432	0.547553	-0.601432	0.547553	15	15	0.566774		217	248	97	-0.64291	0.520283	-0.64291	0.520283	15	15	0.539299		214	251	94
2654.05	3767.83	0.32906	215	220	100	0.218218	0.827259	0.218218	0.827259	14	15	0.846694		237	228	108	0.186651	0.851934	0.186651	0.851934	15	15	0.870194		219	246	99	-0.559954	0.575511	-0.559954	0.575511	15	15	0.594884		218	247	98	-0.601432	0.547553	-0.601432	0.547553	15	15	0.566774		214	251	94
2655.98	3765.09	0.329299	215	220	100	0.218218	0.827259	0.218218	0.827259	14	15	0.846694		236	229	109	0.145173	0.884574	0.145173	0.884574	15	15	0.902462		219	246	99	-0.559954	0.575511	-0.559954	0.575511	15	15	0.594884		218	247	98	-0.601432	0.547553	-0.601432	0.547553	15	15	0.566774		214	251	94
2657.91	3762.36	0.329539	215	220	100	0.218218	0.827259	0.218218	0.827259	14	15	0.846694		236	229	109	0.145173	0.884574	0.145173	0.884574	15	15	0.902462		219	246	99	-0.559954	0.575511	-0.559954	0.575511	15	15	0.594884		219	246	99	-0.559954	0.575511	-0.559954	0.575511	15	15	0.594884		214	251	94
2659.84	3759.63	0.329778	216	219	99	0.261861	0.793428	0.261861	0.793428	14	15	0.813179		237	228	108	0.186651	0.851934	0.186651	0.851934	15	15	0.870194		219	246	99	-0.559954	0.575511	-0.559954	0.575511	15	15	0.594884		218	247	98	-0.601432	0.547553	-0.601432	0.547553	15	15	0.566774		214	251	94
2661.77	3756.9	0.330017	216	219	99	0.261861	0.793428	0.261861	0.793428	14	15	0.813179		237	228	108	0.186651	0.851934	0.186651	0.851934	15	15	0.870194		219	246	99	-0.559954	0.575511	-0.559954	0.575511	15	15	0.594884		218	247	98	-0.601432	0.547553	-0.601432	0.547553	15	15	0.566774		214	251	94
2663.69	3754.18	0.330256	216	219	99	0.261861	0.793428	0.261861	0.793428	14	15	0.813179		236	229	109	0.145173	0.884574	0.145173	0.884574	15	15	0.902462		219	246	99	-0.559954	0.575511	-0.559954	0.575511	15	15	0.594884		218	247	98	-0.601432	0.547553	-0.601432	0.547553	15	15	0.566774		214	251	94
2665.62	3751.47	0.330495	216	219	99	0.261861	0.793428	0.261861	0.793428	14	15	0.813179		236	229	109	0.145173	0.884574	0.145173	0.884574	15	15	0.902462		219	246	99	-0.559954	0.575511	-0.559954	0.575511	15	15	0.594884		218	247	98	-0.601432	0.547553	-0.601432	0.547553	15	15	0.566774		214	251	94
2667.55	3748.75	0.330734	216	219	99	0.261861	0.793428	0.261861	0.793428	14	15	0.813179		236	229	109	0.145173	0.884574	0.145173	0.884574	15	15	0.902462		219	246	99	-0.559954	0.575511	-0.559954	0.575511	15	15	0.594884		218	247	98	-0.601432	0.547553	-0.601432	0.547553	15	15	0.566774		214	251	94
2669.48	3746.05	0.330973	216	219	99	0.261861	0.793428	0.261861	0.793428	14	15	0.813179		237	228	108	0.186651	0.851934	0.186651	0.851934	15	15	0.870194		219	246	99	-0.559954	0.575511	-0.559954	0.575511	15	15	0.594884		219	246	99	-0.559954	0.575511	-0.559954	0.575511	15	15	0.594884		215	250	95
2671.41	3743.34	0.331213	216	219	99	0.261861	0.793428	0.261861	0.793428	14	15	0.813179		237	228	108	0.186651	0.851934	0.186651	0.851934	15	15	0.870194		219	246	99	-0.559954	0.575511	-0.559954	0.575511	15	15	0.594884		219	246	99	-0.559954	0.575511	-0.559954	0.575511	15	15	0.594884		215	250	95
2673.34	3740.64	0.331452	216	219	99	0.261861	0.793428	0.261861	0.793428	14	15	0.813179		237	228	108	0.186651	0.851934	0.186651	0.851934	15	15	0.870194		219	246	99	-0.559954	0.575511	-0.559954	0.575511	15	15	0.594884		219	246	99	-0.559954	0.575511	-0.559954	0.575511	15	15	0.594884		214	251	94
2675.27	3737.94	0.331691	217	218	98	0.305505	0.759982	0.305505	0.759982	14	15	0.779995		237	228	108	0.186651	0.851934	0.186651	0.851934	15	15	0.870194		219	246	99	-0.559954	0.575511	-0.559954	0.575511	15	15	0.594884		219	246	99	-0.559954	0.575511	-0.559954	0.575511	15	15	0.594884		215	250	95
2677.2	3735.25	0.33193	217	218	98	0.305505	0.759982	0.305505	0.759982	14	15	0.779995		236	229	109	0.145173	0.884574	0.145173	0.884574	15	15	0.902462		218	247	98	-0.601432	0.547553	-0.601432	0.547553	15	15	0.566774		220	245	100	-0.518476	0.604127	-0.518476	0.604127	15	15	0.623594		216	249	96
2679.13	3732.56	0.332169	216	219	99	0.261861	0.793428	0.261861	0.793428	14	15	0.813179		236	229	109	0.145173	0.884574	0.145173	0.884574	15	15	0.902462		219	246	99	-0.559954	0.575511	-0.559954	0.575511	15	15	0.594884		220	245	100	-0.518476	0.604127	-0.518476	0.604127	15	15	0.623594		217	248	97
2681.05	3729.88	0.332408	216	219	99	0.261861	0.793428	0.261861	0.793428	14	15	0.813179		236	229	109	0.145173	0.884574	0.145173	0.884574	15	15	0.902462		218	247	98	-0.601432	0.547553	-0.601432	0.547553	15	15	0.566774		221	244	101	-0.476998	0.633364	-0.476998	0.633364	15	15	0.65287		216	249	96
2682.98	3727.19	0.332647	216	219	99	0.261861	0.793428	0.261861	0.793428	14	15	0.813179		235	230	110	0.103695	0.917411	0.103695	0.917411	15	15	0.934887		217	248	97	-0.64291	0.520283	-0.64291	0.520283	15	15	0.539299		220	245	100	-0.518476	0.604127	-0.518476	0.604127	15	15	0.623594		216	249	96
2684.91	3724.52	0.332887	216	219	99	0.261861	0.793428	0.261861	0.793428	14	15	0.813179		235	230	110	0.103695	0.917411	0.103695	0.917411	15	15	0.934887		219	246	99	-0.559954	0.575511	-0.559954	0.575511	15	15	0.594884		220	245	100	-0.518476	0.604127	-0.518476	0.604127	15	15	0.623594		217	248	97
2686.84	3721.84	0.333126	216	219	99	0.261861	0.793428	0.261861	0.793428	14	15	0.813179		235	230	110	0.103695	0.917411	0.103695	0.917411	15	15	0.934887		218	247	98	-0.601432	0.547553	-0.601432	0.547553	15	15	0.566774		221	244	101	-0.476998	0.633364	-0.476998	0.633364	15	15	0.65287		217	248	97
2688.77	3719.17	0.333365	216	219	99	0.261861	0.793428	0.261861	0.793428	14	15	0.813179		235	230	110	0.103695	0.917411	0.103695	0.917411	15	15	0.934887		218	247	98	-0.601432	0.547553	-0.601432	0.547553	15	15	0.566774		221	244	101	-0.476998	0.633364	-0.476998	0.633364	15	15	0.65287		216	249	96
2690.7	3716.51	0.333604	216	219	99	0.261861	0.793428	0.261861	0.793428	14	15	0.813179		236	229	109	0.145173	0.884574	0.145173	0.884574	15	15	0.902462		219	246	99	-0.559954	0.575511	-0.559954	0.575511	15	15	0.594884		221	244	101	-0.476998	0.633364	-0.476998	0.633364	15	15	0.65287		217	248	97
2692.63	3713.85	0.333843	216	219	99	0.261861	0.793428	0.261861	0.793428	14	15	0.813179		237	228	108	0.186651	0.851934	0.186651	0.851934	15	15	0.870194		218	247	98	-0.601432	0.547553	-0.601432	0.547553	15	15	0.566774		221	244	101	-0.476998	0.633364	-0.476998	0.633364	15	15	0.65287		217	248	97
2694.56	3711.19	0.334082	216	219	99	0.261861	0.793428	0.261861	0.793428	14	15	0.813179		237	228	108	0.186651	0.851934	0.186651	0.851934	15	15	0.870194		220	245	100	-0.518476	0.604127	-0.518476	0.604127	15	15	0.623594		222	243	102	-0.43552	0.663186	-0.43552	0.663186	15	15	0.682674		218	247	98
2696.48	3708.53	0.334321	216	219	99	0.261861	0.793428	0.261861	0.793428	14	15	0.813179		236	229	109	0.145173	0.884574	0.145173	0.884574	15	15	0.902462		220	245	100	-0.518476	0.604127	-0.518476	0.604127	15	15	0.623594		222	243	102	-0.43552	0.663186	-0.43552	0.663186	15	15	0.682674		218	247	98
2698.41	3705.88	0.334561	216	219	99	0.261861	0.793428	0.261861	0.793428	14	15	0.813179		236	229	109	0.145173	0.884574	0.145173	0.884574	15	15	0.902462		219	246	99	-0.559954	0.575511	-0.559954	0.575511	15	15	0.594884		222	243	102	-0.43552	0.663186	-0.43552	0.663186	15	15	0.682674		217	248	97
2700.34	3703.23	0.3348	216	219	99	0.261861	0.793428	0.261861	0.793428	14	15	0.813179		236	229	109	0.145173	0.884574	0.145173	0.884574	15	15	0.902462		219	246	99	-0.559954	0.575511	-0.559954	0.575511	15	15	0.594884		222	243	102	-0.43552	0.663186	-0.43552	0.663186	15	15	0.682674		217	248	97
2702.27	3700.59	0.335039	216	219	99	0.261861	0.793428	0.261861	0.793428	14	15	0.813179		236	229	109	0.145173	0.884574	0.145173	0.884574	15	15	0.902462		218	247	98	-0.601432	0.547553	-0.601432	0.547553	15	15	0.566774		222	243	102	-0.43552	0.663186	-0.43552	0.663186	15	15	0.682674		218	247	98
2704.2	3697.95	0.335278	217	218	98	0.305505	0.759982	0.305505	0.759982	14	15	0.779995		236	229	109	0.145173	0.884574	0.145173	0.884574	15	15	0.902462		218	247	98	-0.601432	0.547553	-0.601432	0.547553	15	15	0.566774		222	243	102	-0.43552	0.663186	-0.43552	0.663186	15	15	0.682674		218	247	98
2706.13	3695.32	0.335517	217	218	98	0.305505	0.759982	0.305505	0.759982	14	15	0.779995		236	229	109	0.145173	0.884574	0.145173	0.884574	15	15	0.902462		219	246	99	-0.559954	0.575511	-0.559954	0.575511	15	15	0.594884		222	243	102	-0.43552	0.663186	-0.43552	0.663186	15	15	0.682674		218	247	98
2708.06	3692.68	0.335756	217	218	98	0.305505	0.759982	0.305505	0.759982	14	15	0.779995		237	228	108	0.186651	0.851934	0.186651	0.851934	15	15	0.870194		218	247	98	-0.601432	0.547553	-0.601432	0.547553	15	15	0.566774		222	243	102	-0.43552	0.663186	-0.43552	0.663186	15	15	0.682674		218	247	98
2709.99	3690.06	0.335995	216	219	99	0.261861	0.793428	0.261861	0.793428	14	15	0.813179		237	228	108	0.186651	0.851934	0.186651	0.851934	15	15	0.870194		219	246	99	-0.559954	0.575511	-0.559954	0.575511	15	15	0.594884		223	242	103	-0.394042	0.693551	-0.394042	0.693551	15	15	0.712965		218	247	98
2711.92	3687.43	0.336235	216	219	99	0.261861	0.793428	0.261861	0.793428	14	15	0.813179		237	228	108	0.186651	0.851934	0.186651	0.851934	15	15	0.870194		220	245	100	-0.518476	0.604127	-0.518476	0.604127	15	15	0.623594		223	242	103	-0.394042	0.693551	-0.394042	0.693551	15	15	0.712965		218	247	98
2713.84	3684.81	0.336474	216	219	99	0.261861	0.793428	0.261861	0.793428	14	15	0.813179		236	229	109	0.145173	0.884574	0.145173	0.884574	15	15	0.902462		219	246	99	-0.559954	0.575511	-0.559954	0.575511	15	15	0.594884		223	242	103	-0.394042	0.693551	-0.394042	0.693551	15	15	0.712965		218	247	98
2715.77	3682.19	0.336713	216	219	99	0.261861	0.793428	0.261861	0.793428	14	15	0.813179		236	229	109	0.145173	0.884574	0.145173	0.884574	15	15	0.902462		218	247	98	-0.601432	0.547553	-0.601432	0.547553	15	15	0.566774		223	242	103	-0.394042	0.693551	-0.394042	0.693551	15	15	0.712965		218	247	98
2717.7	3679.58	0.336952	216	219	99	0.261861	0.793428	0.261861	0.793428	14	15	0.813179		237	228	108	0.186651	0.851934	0.186651	0.851934	15	15	0.870194		218	247	98	-0.601432	0.547553	-0.601432	0.547553	15	15	0.566774		223	242	103	-0.394042	0.693551	-0.394042	0.693551	15	15	0.712965		218	247	98
2719.63	3676.97	0.337191	216	219	99	0.261861	0.793428	0.261861	0.793428	14	15	0.813179		237	228	108	0.186651	0.851934	0.186651	0.851934	15	15	0.870194		219	246	99	-0.559954	0.575511	-0.559954	0.575511	15	15	0.594884		223	242	103	-0.394042	0.693551	-0.394042	0.693551	15	15	0.712965		218	247	98
2721.56	3674.36	0.33743	216	219	99	0.261861	0.793428	0.261861	0.793428	14	15	0.813179		237	228	108	0.186651	0.851934	0.186651	0.851934	15	15	0.870194		218	247	98	-0.601432	0.547553	-0.601432	0.547553	15	15	0.566774		223	242	103	-0.394042	0.693551	-0.394042	0.693551	15	15	0.712965		220	245	100
2723.49	3671.76	0.337669	216	219	99	0.261861	0.793428	0.261861	0.793428	14	15	0.813179		237	228	108	0.186651	0.851934	0.186651	0.851934	15	15	0.870194		218	247	98	-0.601432	0.547553	-0.601432	0.547553	15	15	0.566774		223	242	103	-0.394042	0.693551	-0.394042	0.693551	15	15	0.712965		221	244	101
2725.42	3669.16	0.337909	216	219	99	0.261861	0.793428	0.261861	0.793428	14	15	0.813179		237	228	108	0.186651	0.851934	0.186651	0.851934	15	15	0.870194		218	247	98	-0.601432	0.547553	-0.601432	0.547553	15	15	0.566774		223	242	103	-0.394042	0.693551	-0.394042	0.693551	15	15	0.712965		221	244	101
2727.35	3666.57	0.338148	216	219	99	0.261861	0.793428	0.261861	0.793428	14	15	0.813179		237	228	108	0.186651	0.851934	0.186651	0.851934	15	15	0.870194		219	246	99	-0.559954	0.575511	-0.559954	0.575511	15	15	0.594884		223	242	103	-0.394042	0.693551	-0.394042	0.693551	15	15	0.712965		222	243	102
2729.27	3663.98	0.338387	216	219	99	0.261861	0.793428	0.261861	0.793428	14	15	0.813179		237	228	108	0.186651	0.851934	0.186651	0.851934	15	15	0.870194		219	246	99	-0.559954	0.575511	-0.559954	0.575511	15	15	0.594884		224	241	104	-0.352564	0.724416	-0.352564	0.724416	15	15	0.743702		221	244	101
2731.2	3661.39	0.338626	216	219	99	0.261861	0.793428	0.261861	0.793428	14	15	0.813179		237	228	108	0.186651	0.851934	0.186651	0.851934	15	15	0.870194		218	247	98	-0.601432	0.547553	-0.601432	0.547553	15	15	0.566774		224	241	104	-0.352564	0.724416	-0.352564	0.724416	15	15	0.743702		221	244	101
2733.13	3658.81	0.338865	216	219	99	0.261861	0.793428	0.261861	0.793428	14	15	0.813179		237	228	108	0.186651	0.851934	0.186651	0.851934	15	15	0.870194		219	246	99	-0.559954	0.575511	-0.559954	0.575511	15	15	0.594884		224	241	104	-0.352564	0.724416	-0.352564	0.724416	15	15	0.743702		221	244	101
2735.06	3656.23	0.339104	216	219	99	0.261861	0.793428	0.261861	0.793428	14	15	0.813179		237	228	108	0.186651	0.851934	0.186651	0.851934	15	15	0.870194		219	246	99	-0.559954	0.575511	-0.559954	0.575511	15	15	0.594884		224	241	104	-0.352564	0.724416	-0.352564	0.724416	15	15	0.743702		220	245	100
2736.99	3653.65	0.339343	216	219	99	0.261861	0.793428	0.261861	0.793428	14	15	0.813179		237	228	108	0.186651	0.851934	0.186651	0.851934	15	15	0.870194		219	246	99	-0.559954	0.575511	-0.559954	0.575511	15	15	0.594884		225	240	105	-0.311086	0.755736	-0.311086	0.755736	15	15	0.77484		221	244	101
2738.92	3651.08	0.339583	215	220	100	0.218218	0.827259	0.218218	0.827259	14	15	0.846694		237	228	108	0.186651	0.851934	0.186651	0.851934	15	15	0.870194		219	246	99	-0.559954	0.575511	-0.559954	0.575511	15	15	0.594884		223	242	103	-0.394042	0.693551	-0.394042	0.693551	15	15	0.712965		222	243	102
2740.85	3648.51	0.339822	215	220	100	0.218218	0.827259	0.218218	0.827259	14	15	0.846694		237	228	108	0.186651	0.851934	0.186651	0.851934	15	15	0.870194		219	246	99	-0.559954	0.575511	-0.559954	0.575511	15	15	0.594884		223	242	103	-0.394042	0.693551	-0.394042	0.693551	15	15	0.712965		221	244	101
2742.78	3645.94	0.340061	215	220	100	0.218218	0.827259	0.218218	0.827259	14	15	0.846694		237	228	108	0.186651	0.851934	0.186651	0.851934	15	15	0.870194		219	246	99	-0.559954	0.575511	-0.559954	0.575511	15	15	0.594884		223	242	103	-0.394042	0.693551	-0.394042	0.693551	15	15	0.712965		221	244	101
2744.71	3643.38	0.3403	215	220	100	0.218218	0.827259	0.218218	0.827259	14	15	0.846694		237	228	108	0.186651	0.851934	0.186651	0.851934	15	15	0.870194		219	246	99	-0.559954	0.575511	-0.559954	0.575511	15	15	0.594884		225	240	105	-0.311086	0.755736	-0.311086	0.755736	15	15	0.77484		221	244	101
2746.63	3640.82	0.340539	215	220	100	0.218218	0.827259	0.218218	0.827259	14	15	0.846694		237	228	108	0.186651	0.851934	0.186651	0.851934	15	15	0.870194		219	246	99	-0.559954	0.575511	-0.559954	0.575511	15	15	0.594884		225	240	105	-0.311086	0.755736	-0.311086	0.755736	15	15	0.77484		220	245	100
2748.56	3638.27	0.340778	215	220	100	0.218218	0.827259	0.218218	0.827259	14	15	0.846694		237	228	108	0.186651	0.851934	0.186651	0.851934	15	15	0.870194		219	246	99	-0.559954	0.575511	-0.559954	0.575511	15	15	0.594884		225	240	105	-0.311086	0.755736	-0.311086	0.755736	15	15	0.77484		222	243	102
2750.49	3635.71	0.341017	215	220	100	0.218218	0.827259	0.218218	0.827259	14	15	0.846694		237	228	108	0.186651	0.851934	0.186651	0.851934	15	15	0.870194		219	246	99	-0.559954	0.575511	-0.559954	0.575511	15	15	0.594884		225	240	105	-0.311086	0.755736	-0.311086	0.755736	15	15	0.77484		222	243	102
2752.42	3633.17	0.341257	215	220	100	0.218218	0.827259	0.218218	0.827259	14	15	0.846694		237	228	108	0.186651	0.851934	0.186651	0.851934	15	15	0.870194		219	246	99	-0.559954	0.575511	-0.559954	0.575511	15	15	0.594884		225	240	105	-0.311086	0.755736	-0.311086	0.755736	15	15	0.77484		222	243	102
2754.35	3630.62	0.341496	215	220	100	0.218218	0.827259	0.218218	0.827259	14	15	0.846694		237	228	108	0.186651	0.851934	0.186651	0.851934	15	15	0.870194		219	246	99	-0.559954	0.575511	-0.559954	0.575511	15	15	0.594884		225	240	105	-0.311086	0.755736	-0.311086	0.755736	15	15	0.77484		223	242	103
2756.28	3628.08	0.341735	215	220	100	0.218218	0.827259	0.218218	0.827259	14	15	0.846694		237	228	108	0.186651	0.851934	0.186651	0.851934	15	15	0.870194		219	246	99	-0.559954	0.575511	-0.559954	0.575511	15	15	0.594884		225	240	105	-0.311086	0.755736	-0.311086	0.755736	15	15	0.77484		222	243	102
2758.21	3625.54	0.341974	215	220	100	0.218218	0.827259	0.218218	0.827259	14	15	0.846694		237	228	108	0.186651	0.851934	0.186651	0.851934	15	15	0.870194		219	246	99	-0.559954	0.575511	-0.559954	0.575511	15	15	0.594884		224	241	104	-0.352564	0.724416	-0.352564	0.724416	15	15	0.743702		222	243	102
2760.14	3623.01	0.342213	215	220	100	0.218218	0.827259	0.218218	0.827259	14	15	0.846694		237	228	108	0.186651	0.851934	0.186651	0.851934	15	15	0.870194		219	246	99	-0.559954	0.575511	-0.559954	0.575511	15	15	0.594884		224	241	104	-0.352564	0.724416	-0.352564	0.724416	15	15	0.743702		222	243	102
2762.06	3620.48	0.342452	215	220	100	0.218218	0.827259	0.218218	0.827259	14	15	0.846694		238	227	107	0.228129	0.819546	0.228129	0.819546	15	15	0.838135		219	246	99	-0.559954	0.575511	-0.559954	0.575511	15	15	0.594884		224	241	104	-0.352564	0.724416	-0.352564	0.724416	15	15	0.743702		222	243	102
2763.99	3617.95	0.342691	215	220	100	0.218218	0.827259	0.218218	0.827259	14	15	0.846694		238	227	107	0.228129	0.819546	0.228129	0.819546	15	15	0.838135		219	246	99	-0.559954	0.575511	-0.559954	0.575511	15	15	0.594884		224	241	104	-0.352564	0.724416	-0.352564	0.724416	15	15	0.743702		222	243	102
2765.92	3615.43	0.342931	215	220	100	0.218218	0.827259	0.218218	0.827259	14	15	0.846694		238	227	107	0.228129	0.819546	0.228129	0.819546	15	15	0.838135		219	246	99	-0.559954	0.575511	-0.559954	0.575511	15	15	0.594884		224	241	104	-0.352564	0.724416	-0.352564	0.724416	15	15	0.743702		222	243	102
2767.85	3612.91	0.34317	215	220	100	0.218218	0.827259	0.218218	0.827259	14	15	0.846694		238	227	107	0.228129	0.819546	0.228129	0.819546	15	15	0.838135		219	246	99	-0.559954	0.575511	-0.559954	0.575511	15	15	0.594884		224	241	104	-0.352564	0.724416	-0.352564	0.724416	15	15	0.743702		222	243	102
2769.78	3610.4	0.343409	215	220	100	0.218218	0.827259	0.218218	0.827259	14	15	0.846694		239	226	106	0.269607	0.787462	0.269607	0.787462	15	15	0.806334		219	246	99	-0.559954	0.575511	-0.559954	0.575511	15	15	0.594884		224	241	104	-0.352564	0.724416	-0.352564	0.724416	15	15	0.743702		222	243	102
2771.71	3607.88	0.343648	215	220	100	0.218218	0.827259	0.218218	0.827259	14	15	0.846694		239	226	106	0.269607	0.787462	0.269607	0.787462	15	15	0.806334		219	246	99	-0.559954	0.575511	-0.559954	0.575511	15	15	0.594884		224	241	104	-0.352564	0.724416	-0.352564	0.724416	15	15	0.743702		222	243	102
2773.64	3605.37	0.343887	214	221	101	0.174574	0.861414	0.174574	0.861414	14	15	0.880478		239	226	106	0.269607	0.787462	0.269607	0.787462	15	15	0.806334		219	246	99	-0.559954	0.575511	-0.559954	0.575511	15	15	0.594884		223	242	103	-0.394042	0.693551	-0.394042	0.693551	15	15	0.712965		223	242	103
2775.57	3602.87	0.344126	213	222	102	0.130931	0.89583	0.130931	0.89583	14	15	0.914475		239	226	106	0.269607	0.787462	0.269607	0.787462	15	15	0.806334		219	246	99	-0.559954	0.575511	-0.559954	0.575511	15	15	0.594884		222	243	102	-0.43552	0.663186	-0.43552	0.663186	15	15	0.682674		223	242	103
2777.5	3600.37	0.344365	213	222	102	0.130931	0.89583	0.130931	0.89583	14	15	0.914475		239	226	106	0.269607	0.787462	0.269607	0.787462	15	15	0.806334		219	246	99	-0.559954	0.575511	-0.559954	0.575511	15	15	0.594884		222	243	102	-0.43552	0.663186	-0.43552	0.663186	15	15	0.682674		223	242	103
2779.42	3597.87	0.344605	213	222	102	0.130931	0.89583	0.130931	0.89583	14	15	0.914475		239	226	106	0.269607	0.787462	0.269607	0.787462	15	15	0.806334		219	246	99	-0.559954	0.575511	-0.559954	0.575511	15	15	0.594884		223	242	103	-0.394042	0.693551	-0.394042	0.693551	15	15	0.712965		224	241	104
2781.35	3595.37	0.344844	213	222	102	0.130931	0.89583	0.130931	0.89583	14	15	0.914475		239	226	106	0.269607	0.787462	0.269607	0.787462	15	15	0.806334		219	246	99	-0.559954	0.575511	-0.559954	0.575511	15	15	0.594884		224	241	104	-0.352564	0.724416	-0.352564	0.724416	15	15	0.743702		224	241	104
2783.28	3592.88	0.345083	212	223	103	0.0872872	0.930443	0.0872872	0.930443	14	15	0.948623		238	227	107	0.228129	0.819546	0.228129	0.819546	15	15	0.838135		219	246	99	-0.559954	0.575511	-0.559954	0.575511	15	15	0.594884		224	241	104	-0.352564	0.724416	-0.352564	0.724416	15	15	0.743702		224	241	104
2785.21	3590.39	0.345322	211	224	104	0.0436436	0.965189	0.0436436	0.965189	14	15	0.982865		238	227	107	0.228129	0.819546	0.228129	0.819546	15	15	0.838135		219	246	99	-0.559954	0.575511	-0.559954	0.575511	15	15	0.594884		224	241	104	-0.352564	0.724416	-0.352564	0.724416	15	15	0.743702		224	241	104
2787.14	3587.91	0.345561	213	222	102	0.130931	0.89583	0.130931	0.89583	14	15	0.914475		238	227	107	0.228129	0.819546	0.228129	0.819546	15	15	0.838135		219	246	99	-0.559954	0.575511	-0.559954	0.575511	15	15	0.594884		224	241	104	-0.352564	0.724416	-0.352564	0.724416	15	15	0.743702		224	241	104
2789.07	3585.43	0.3458	213	222	102	0.130931	0.89583	0.130931	0.89583	14	15	0.914475		238	227	107	0.228129	0.819546	0.228129	0.819546	15	15	0.838135		219	246	99	-0.559954	0.575511	-0.559954	0.575511	15	15	0.594884		222	243	102	-0.43552	0.663186	-0.43552	0.663186	15	15	0.682674		225	240	105
2791	3582.95	0.346039	212	223	103	0.0872872	0.930443	0.0872872	0.930443	14	15	0.948623		238	227	107	0.228129	0.819546	0.228129	0.819546	15	15	0.838135		219	246	99	-0.559954	0.575511	-0.559954	0.575511	15	15	0.594884		222	243	102	-0.43552	0.663186	-0.43552	0.663186	15	15	0.682674		225	240	105
2792.93	3580.47	0.346279	212	223	103	0.0872872	0.930443	0.0872872	0.930443	14	15	0.948623		239	226	106	0.269607	0.787462	0.269607	0.787462	15	15	0.806334		219	246	99	-0.559954	0.575511	-0.559954	0.575511	15	15	0.594884		222	243	102	-0.43552	0.663186	-0.43552	0.663186	15	15	0.682674		225	240	105
2794.85	3578	0.346518	211	224	104	0.0436436	0.965189	0.0436436	0.965189	14	15	0.982865		239	226	106	0.269607	0.787462	0.269607	0.787462	15	15	0.806334		219	246	99	-0.559954	0.575511	-0.559954	0.575511	15	15	0.594884		223	242	103	-0.394042	0.693551	-0.394042	0.693551	15	15	0.712965		225	240	105
2796.78	3575.54	0.346757	211	224	104	0.0436436	0.965189	0.0436436	0.965189	14	15	0.982865		239	226	106	0.269607	0.787462	0.269607	0.787462	15	15	0.806334		219	246	99	-0.559954	0.575511	-0.559954	0.575511	15	15	0.594884		224	241	104	-0.352564	0.724416	-0.352564	0.724416	15	15	0.743702		225	240	105
2798.71	3573.07	0.346996	212	223	103	0.0872872	0.930443	0.0872872	0.930443	14	15	0.948623		239	226	106	0.269607	0.787462	0.269607	0.787462	15	15	0.806334		219	246	99	-0.559954	0.575511	-0.559954	0.575511	15	15	0.594884		223	242	103	-0.394042	0.693551	-0.394042	0.693551	15	15	0.712965		225	240	105
2800.64	3570.61	0.347235	210	225	105	0	1	0	1	14	15	1.01714		239	226	106	0.269607	0.787462	0.269607	0.787462	15	15	0.806334		219	246	99	-0.559954	0.575511	-0.559954	0.575511	15	15	0.594884		223	242	103	-0.394042	0.693551	-0.394042	0.693551	15	15	0.712965		227	238	107
2802.57	3568.15	0.347474	211	224	104	0.0436436	0.965189	0.0436436	0.965189	14	15	0.982865		239	226	106	0.269607	0.787462	0.269607	0.787462	15	15	0.806334		220	245	100	-0.518476	0.604127	-0.518476	0.604127	15	15	0.623594		224	241	104	-0.352564	0.724416	-0.352564	0.724416	15	15	0.743702		227	238	107
2804.5	3565.7	0.347713	211	224	104	0.0436436	0.965189	0.0436436	0.965189	14	15	0.982865		239	226	106	0.269607	0.787462	0.269607	0.787462	15	15	0.806334		220	245	100	-0.518476	0.604127	-0.518476	0.604127	15	15	0.623594		224	241	104	-0.352564	0.724416	-0.352564	0.724416	15	15	0.743702		227	238	107
2806.43	3563.25	0.347953	211	224	104	0.0436436	0.965189	0.0436436	0.965189	14	15	0.982865		239	226	106	0.269607	0.787462	0.269607	0.787462	15	15	0.806334		220	245	100	-0.518476	0.604127	-0.518476	0.604127	15	15	0.623594		224	241	104	-0.352564	0.724416	-0.352564	0.724416	15	15	0.743702		227	238	107
2808.36	3560.8	0.348192	211	224	104	0.0436436	0.965189	0.0436436	0.965189	14	15	0.982865		241	224	104	0.352564	0.724416	0.352564	0.724416	15	15	0.743702		220	245	100	-0.518476	0.604127	-0.518476	0.604127	15	15	0.623594		222	243	102	-0.43552	0.663186	-0.43552	0.663186	15	15	0.682674		227	238	107
2810.28	3558.36	0.348431	211	224	104	0.0436436	0.965189	0.0436436	0.965189	14	15	0.982865		241	224	104	0.352564	0.724416	0.352564	0.724416	15	15	0.743702		220	245	100	-0.518476	0.604127	-0.518476	0.604127	15	15	0.623594		222	243	102	-0.43552	0.663186	-0.43552	0.663186	15	15	0.682674		227	238	107
2812.21	3555.92	0.34867	211	224	104	0.0436436	0.965189	0.0436436	0.965189	14	15	0.982865		240	225	105	0.311086	0.755736	0.311086	0.755736	15	15	0.77484		220	245	100	-0.518476	0.604127	-0.518476	0.604127	15	15	0.623594		222	243	102	-0.43552	0.663186	-0.43552	0.663186	15	15	0.682674		227	238	107
2814.14	3553.48	0.348909	211	224	104	0.0436436	0.965189	0.0436436	0.965189	14	15	0.982865		240	225	105	0.311086	0.755736	0.311086	0.755736	15	15	0.77484		220	245	100	-0.518476	0.604127	-0.518476	0.604127	15	15	0.623594		223	242	103	-0.394042	0.693551	-0.394042	0.693551	15	15	0.712965		227	238	107
2816.07	3551.05	0.349148	210	225	105	0	1	0	1	14	15	1.01714		241	224	104	0.352564	0.724416	0.352564	0.724416	15	15	0.743702		220	245	100	-0.518476	0.604127	-0.518476	0.604127	15	15	0.623594		223	242	103	-0.394042	0.693551	-0.394042	0.693551	15	15	0.712965		227	238	107
2818	3548.62	0.349387	210	225	105	0	1	0	1	14	15	1.01714		241	224	104	0.352564	0.724416	0.352564	0.724416	15	15	0.743702		221	244	101	-0.476998	0.633364	-0.476998	0.633364	15	15	0.65287		223	242	103	-0.394042	0.693551	-0.394042	0.693551	15	15	0.712965		227	238	107
2819.93	3546.19	0.349627	210	225	105	0	1	0	1	14	15	1.01714		241	224	104	0.352564	0.724416	0.352564	0.724416	15	15	0.743702		220	245	100	-0.518476	0.604127	-0.518476	0.604127	15	15	0.623594		223	242	103	-0.394042	0.693551	-0.394042	0.693551	15	15	0.712965		227	238	107
2821.86	3543.76	0.349866	209	226	104	-0.0436436	0.965189	-0.0436436	0.965189	14	15	0.982865		242	223	103	0.394042	0.693551	0.394042	0.693551	15	15	0.712965		221	244	101	-0.476998	0.633364	-0.476998	0.633364	15	15	0.65287		224	241	104	-0.352564	0.724416	-0.352564	0.724416	15	15	0.743702		227	238	107
2823.79	3541.34	0.350105	208	227	103	-0.0872872	0.930443	-0.0872872	0.930443	14	15	0.948623		242	223	103	0.394042	0.693551	0.394042	0.693551	15	15	0.712965		221	244	101	-0.476998	0.633364	-0.476998	0.633364	15	15	0.65287		223	242	103	-0.394042	0.693551	-0.394042	0.693551	15	15	0.712965		229	236	109
2825.72	3538.93	0.350344	208	227	103	-0.0872872	0.930443	-0.0872872	0.930443	14	15	0.948623		242	223	103	0.394042	0.693551	0.394042	0.693551	15	15	0.712965		223	242	103	-0.394042	0.693551	-0.394042	0.693551	15	15	0.712965		222	243	102	-0.43552	0.663186	-0.43552	0.663186	15	15	0.682674		228	237	108
2827.64	3536.51	0.350583	208	227	103	-0.0872872	0.930443	-0.0872872	0.930443	14	15	0.948623		242	223	103	0.394042	0.693551	0.394042	0.693551	15	15	0.712965		222	243	102	-0.43552	0.663186	-0.43552	0.663186	15	15	0.682674		223	242	103	-0.394042	0.693551	-0.394042	0.693551	15	15	0.712965		228	237	108
2829.57	3534.1	0.350822	207	228	102	-0.130931	0.89583	-0.130931	0.89583	14	15	0.914475		242	223	103	0.394042	0.693551	0.394042	0.693551	15	15	0.712965		222	243	102	-0.43552	0.663186	-0.43552	0.663186	15	15	0.682674		223	242	103	-0.394042	0.693551	-0.394042	0.693551	15	15	0.712965		228	237	108
2831.5	3531.69	0.351061	208	227	103	-0.0872872	0.930443	-0.0872872	0.930443	14	15	0.948623		242	223	103	0.394042	0.693551	0.394042	0.693551	15	15	0.712965		222	243	102	-0.43552	0.663186	-0.43552	0.663186	15	15	0.682674		223	242	103	-0.394042	0.693551	-0.394042	0.693551	15	15	0.712965		230	235	110
2833.43	3529.29	0.351301	208	227	103	-0.0872872	0.930443	-0.0872872	0.930443	14	15	0.948623		242	223	103	0.394042	0.693551	0.394042	0.693551	15	15	0.712965		222	243	102	-0.43552	0.663186	-0.43552	0.663186	15	15	0.682674		223	242	103	-0.394042	0.693551	-0.394042	0.693551	15	15	0.712965		230	235	110
2835.36	3526.89	0.35154	208	227	103	-0.0872872	0.930443	-0.0872872	0.930443	14	15	0.948623		242	223	103	0.394042	0.693551	0.394042	0.693551	15	15	0.712965		222	243	102	-0.43552	0.663186	-0.43552	0.663186	15	15	0.682674		223	242	103	-0.394042	0.693551	-0.394042	0.693551	15	15	0.712965		230	235	110
2837.29	3524.49	0.351779	208	227	103	-0.0872872	0.930443	-0.0872872	0.930443	14	15	0.948623		243	222	102	0.43552	0.663186	0.43552	0.663186	15	15	0.682674		222	243	102	-0.43552	0.663186	-0.43552	0.663186	15	15	0.682674		224	241	104	-0.352564	0.724416	-0.352564	0.724416	15	15	0.743702		229	236	109
2839.22	3522.1	0.352018	206	229	101	-0.174574	0.861414	-0.174574	0.861414	14	15	0.880478		243	222	102	0.43552	0.663186	0.43552	0.663186	15	15	0.682674		222	243	102	-0.43552	0.663186	-0.43552	0.663186	15	15	0.682674		223	242	103	-0.394042	0.693551	-0.394042	0.693551	15	15	0.712965		228	237	108
2841.15	3519.71	0.352257	206	229	101	-0.174574	0.861414	-0.174574	0.861414	14	15	0.880478		243	222	102	0.43552	0.663186	0.43552	0.663186	15	15	0.682674		222	243	102	-0.43552	0.663186	-0.43552	0.663186	15	15	0.682674		224	241	104	-0.352564	0.724416	-0.352564	0.724416	15	15	0.743702		227	238	107
2843.07	3517.32	0.352496	206	229	101	-0.174574	0.861414	-0.174574	0.861414	14	15	0.880478		243	222	102	0.43552	0.663186	0.43552	0.663186	15	15	0.682674		222	243	102	-0.43552	0.663186	-0.43552	0.663186	15	15	0.682674		224	241	104	-0.352564	0.724416	-0.352564	0.724416	15	15	0.743702		227	238	107
2845	3514.93	0.352735	207	228	102	-0.130931	0.89583	-0.130931	0.89583	14	15	0.914475		243	222	102	0.43552	0.663186	0.43552	0.663186	15	15	0.682674		222	243	102	-0.43552	0.663186	-0.43552	0.663186	15	15	0.682674		224	241	104	-0.352564	0.724416	-0.352564	0.724416	15	15	0.743702		225	240	105
2846.93	3512.55	0.352975	208	227	103	-0.0872872	0.930443	-0.0872872	0.930443	14	15	0.948623		243	222	102	0.43552	0.663186	0.43552	0.663186	15	15	0.682674		222	243	102	-0.43552	0.663186	-0.43552	0.663186	15	15	0.682674		225	240	105	-0.311086	0.755736	-0.311086	0.755736	15	15	0.77484		224	241	104
2848.86	3510.17	0.353214	209	226	104	-0.0436436	0.965189	-0.0436436	0.965189	14	15	0.982865		243	222	102	0.43552	0.663186	0.43552	0.663186	15	15	0.682674		222	243	102	-0.43552	0.663186	-0.43552	0.663186	15	15	0.682674		225	240	105	-0.311086	0.755736	-0.311086	0.755736	15	15	0.77484		223	242	103
2850.79	3507.8	0.353453	209	226	104	-0.0436436	0.965189	-0.0436436	0.965189	14	15	0.982865		243	222	102	0.43552	0.663186	0.43552	0.663186	15	15	0.682674		222	243	102	-0.43552	0.663186	-0.43552	0.663186	15	15	0.682674		226	239	106	-0.269607	0.787462	-0.269607	0.787462	15	15	0.806334		224	241	104
2852.72	3505.43	0.353692	208	227	103	-0.0872872	0.930443	-0.0872872	0.930443	14	15	0.948623		243	222	102	0.43552	0.663186	0.43552	0.663186	15	15	0.682674		222	243	102	-0.43552	0.663186	-0.43552	0.663186	15	15	0.682674		226	239	106	-0.269607	0.787462	-0.269607	0.787462	15	15	0.806334		225	240	105
2854.65	3503.06	0.353931	206	229	101	-0.174574	0.861414	-0.174574	0.861414	14	15	0.880478		243	222	102	0.43552	0.663186	0.43552	0.663186	15	15	0.682674		222	243	102	-0.43552	0.663186	-0.43552	0.663186	15	15	0.682674		226	239	106	-0.269607	0.787462	-0.269607	0.787462	15	15	0.806334		228	237	108
2856.58	3500.69	0.35417	205	230	100	-0.218218	0.827259	-0.218218	0.827259	14	15	0.846694		243	222	102	0.43552	0.663186	0.43552	0.663186	15	15	0.682674		222	243	102	-0.43552	0.663186	-0.43552	0.663186	15	15	0.682674		226	239	106	-0.269607	0.787462	-0.269607	0.787462	15	15	0.806334		229	236	109
2858.51	3498.33	0.354409	205	230	100	-0.218218	0.827259	-0.218218	0.827259	14	15	0.846694		243	222	102	0.43552	0.663186	0.43552	0.663186	15	15	0.682674		222	243	102	-0.43552	0.663186	-0.43552	0.663186	15	15	0.682674		222	243	102	-0.43552	0.663186	-0.43552	0.663186	15	15	0.682674		231	234	111
2860.43	3495.97	0.354649	204	231	99	-0.261861	0.793428	-0.261861	0.793428	14	15	0.813179		243	222	102	0.43552	0.663186	0.43552	0.663186	15	15	0.682674		222	243	102	-0.43552	0.663186	-0.43552	0.663186	15	15	0.682674		225	240	105	-0.311086	0.755736	-0.311086	0.755736	15	15	0.77484		231	234	111
2862.36	3493.62	0.354888	205	230	100	-0.218218	0.827259	-0.218218	0.827259	14	15	0.846694		243	222	102	0.43552	0.663186	0.43552	0.663186	15	15	0.682674		223	242	103	-0.394042	0.693551	-0.394042	0.693551	15	15	0.712965		225	240	105	-0.311086	0.755736	-0.311086	0.755736	15	15	0.77484		230	235	110
2864.29	3491.26	0.355127	204	231	99	-0.261861	0.793428	-0.261861	0.793428	14	15	0.813179		243	222	102	0.43552	0.663186	0.43552	0.663186	15	15	0.682674		223	242	103	-0.394042	0.693551	-0.394042	0.693551	15	15	0.712965		225	240	105	-0.311086	0.755736	-0.311086	0.755736	15	15	0.77484		230	235	110
2866.22	3488.92	0.355366	204	231	99	-0.261861	0.793428	-0.261861	0.793428	14	15	0.813179		243	222	102	0.43552	0.663186	0.43552	0.663186	15	15	0.682674		224	241	104	-0.352564	0.724416	-0.352564	0.724416	15	15	0.743702		224	241	104	-0.352564	0.724416	-0.352564	0.724416	15	15	0.743702		230	235	110
2868.15	3486.57	0.355605	204	231	99	-0.261861	0.793428	-0.261861	0.793428	14	15	0.813179		243	222	102	0.43552	0.663186	0.43552	0.663186	15	15	0.682674		224	241	104	-0.352564	0.724416	-0.352564	0.724416	15	15	0.743702		223	242	103	-0.394042	0.693551	-0.394042	0.693551	15	15	0.712965		230	235	110
2870.08	3484.23	0.355844	205	230	100	-0.218218	0.827259	-0.218218	0.827259	14	15	0.846694		243	222	102	0.43552	0.663186	0.43552	0.663186	15	15	0.682674		224	241	104	-0.352564	0.724416	-0.352564	0.724416	15	15	0.743702		223	242	103	-0.394042	0.693551	-0.394042	0.693551	15	15	0.712965		229	236	109
2872.01	3481.89	0.356083	205	230	100	-0.218218	0.827259	-0.218218	0.827259	14	15	0.846694		244	221	101	0.476998	0.633364	0.476998	0.633364	15	15	0.65287		224	241	104	-0.352564	0.724416	-0.352564	0.724416	15	15	0.743702		223	242	103	-0.394042	0.693551	-0.394042	0.693551	15	15	0.712965		228	237	108
2873.94	3479.55	0.356323	205	230	100	-0.218218	0.827259	-0.218218	0.827259	14	15	0.846694		245	220	100	0.518476	0.604127	0.518476	0.604127	15	15	0.623594		224	241	104	-0.352564	0.724416	-0.352564	0.724416	15	15	0.743702		224	241	104	-0.352564	0.724416	-0.352564	0.724416	15	15	0.743702		228	237	108
2875.86	3477.22	0.356562	205	230	100	-0.218218	0.827259	-0.218218	0.827259	14	15	0.846694		245	220	100	0.518476	0.604127	0.518476	0.604127	15	15	0.623594		225	240	105	-0.311086	0.755736	-0.311086	0.755736	15	15	0.77484		222	243	102	-0.43552	0.663186	-0.43552	0.663186	15	15	0.682674		225	240	105
2877.79	3474.88	0.356801	205	230	100	-0.218218	0.827259	-0.218218	0.827259	14	15	0.846694		243	222	102	0.43552	0.663186	0.43552	0.663186	15	15	0.682674		225	240	105	-0.311086	0.755736	-0.311086	0.755736	15	15	0.77484		222	243	102	-0.43552	0.663186	-0.43552	0.663186	15	15	0.682674		226	239	106
2879.72	3472.56	0.35704	205	230	100	-0.218218	0.827259	-0.218218	0.827259	14	15	0.846694		246	219	99	0.559954	0.575511	0.559954	0.575511	15	15	0.594884		225	240	105	-0.311086	0.755736	-0.311086	0.755736	15	15	0.77484		220	245	100	-0.518476	0.604127	-0.518476	0.604127	15	15	0.623594		225	240	105
2881.65	3470.23	0.357279	205	230	100	-0.218218	0.827259	-0.218218	0.827259	14	15	0.846694		246	219	99	0.559954	0.575511	0.559954	0.575511	15	15	0.594884		225	240	105	-0.311086	0.755736	-0.311086	0.755736	15	15	0.77484		220	245	100	-0.518476	0.604127	-0.518476	0.604127	15	15	0.623594		224	241	104
2883.58	3467.91	0.357518	205	230	100	-0.218218	0.827259	-0.218218	0.827259	14	15	0.846694		245	220	100	0.518476	0.604127	0.518476	0.604127	15	15	0.623594		225	240	105	-0.311086	0.755736	-0.311086	0.755736	15	15	0.77484		220	245	100	-0.518476	0.604127	-0.518476	0.604127	15	15	0.623594		224	241	104
2885.51	3465.59	0.357757	205	230	100	-0.218218	0.827259	-0.218218	0.827259	14	15	0.846694		246	219	99	0.559954	0.575511	0.559954	0.575511	15	15	0.594884		225	240	105	-0.311086	0.755736	-0.311086	0.755736	15	15	0.77484		220	245	100	-0.518476	0.604127	-0.518476	0.604127	15	15	0.623594		224	241	104
2887.44	3463.28	0.357997	205	230	100	-0.218218	0.827259	-0.218218	0.827259	14	15	0.846694		245	220	100	0.518476	0.604127	0.518476	0.604127	15	15	0.623594		225	240	105	-0.311086	0.755736	-0.311086	0.755736	15	15	0.77484		221	244	101	-0.476998	0.633364	-0.476998	0.633364	15	15	0.65287		224	241	104
2889.37	3460.97	0.358236	205	230	100	-0.218218	0.827259	-0.218218	0.827259	14	15	0.846694		245	220	100	0.518476	0.604127	0.518476	0.604127	15	15	0.623594		225	240	105	-0.311086	0.755736	-0.311086	0.755736	15	15	0.77484		221	244	101	-0.476998	0.633364	-0.476998	0.633364	15	15	0.65287		224	241	104
2891.3	3458.66	0.358475	205	230	100	-0.218218	0.827259	-0.218218	0.827259	14	15	0.846694		245	220	100	0.518476	0.604127	0.518476	0.604127	15	15	0.623594		225	240	105	-0.311086	0.755736	-0.311086	0.755736	15	15	0.77484		221	244	101	-0.476998	0.633364	-0.476998	0.633364	15	15	0.65287		223	242	103
2893.22	3456.35	0.358714	205	230	100	-0.218218	0.827259	-0.218218	0.827259	14	15	0.846694		245	220	100	0.518476	0.604127	0.518476	0.604127	15	15	0.623594		227	238	107	-0.228129	0.819546	-0.228129	0.819546	15	15	0.838135		219	246	99	-0.559954	0.575511	-0.559954	0.575511	15	15	0.594884		223	242	103
2895.15	3454.05	0.358953	205	230	100	-0.218218	0.827259	-0.218218	0.827259	14	15	0.846694		245	220	100	0.518476	0.604127	0.518476	0.604127	15	15	0.623594		227	238	107	-0.228129	0.819546	-0.228129	0.819546	15	15	0.838135		220	245	100	-0.518476	0.604127	-0.518476	0.604127	15	15	0.623594		223	242	103
2897.08	3451.75	0.359192	204	231	99	-0.261861	0.793428	-0.261861	0.793428	14	15	0.813179		245	220	100	0.518476	0.604127	0.518476	0.604127	15	15	0.623594		228	237	108	-0.186651	0.851934	-0.186651	0.851934	15	15	0.870194		221	244	101	-0.476998	0.633364	-0.476998	0.633364	15	15	0.65287		222	243	102
2899.01	3449.45	0.359431	204	231	99	-0.261861	0.793428	-0.261861	0.793428	14	15	0.813179		245	220	100	0.518476	0.604127	0.518476	0.604127	15	15	0.623594		228	237	108	-0.186651	0.851934	-0.186651	0.851934	15	15	0.870194		220	245	100	-0.518476	0.604127	-0.518476	0.604127	15	15	0.623594		222	243	102
2900.94	3447.16	0.359671	205	230	100	-0.218218	0.827259	-0.218218	0.827259	14	15	0.846694		245	220	100	0.518476	0.604127	0.518476	0.604127	15	15	0.623594		228	237	108	-0.186651	0.851934	-0.186651	0.851934	15	15	0.870194		219	246	99	-0.559954	0.575511	-0.559954	0.575511	15	15	0.594884		220	245	100
2902.87	3444.87	0.35991	205	230	100	-0.218218	0.827259	-0.218218	0.827259	14	15	0.846694		245	220	100	0.518476	0.604127	0.518476	0.604127	15	15	0.623594		228	237	108	-0.186651	0.851934	-0.186651	0.851934	15	15	0.870194		219	246	99	-0.559954	0.575511	-0.559954	0.575511	15	15	0.594884		220	245	100
2904.8	3442.58	0.360149	204	231	99	-0.261861	0.793428	-0.261861	0.793428	14	15	0.813179		245	220	100	0.518476	0.604127	0.518476	0.604127	15	15	0.623594		229	236	109	-0.145173	0.884574	-0.145173	0.884574	15	15	0.902462		220	245	100	-0.518476	0.604127	-0.518476	0.604127	15	15	0.623594		219	246	99
2906.73	3440.3	0.360388	206	229	101	-0.174574	0.861414	-0.174574	0.861414	14	15	0.880478		245	220	100	0.518476	0.604127	0.518476	0.604127	15	15	0.623594		229	236	109	-0.145173	0.884574	-0.145173	0.884574	15	15	0.902462		220	245	100	-0.518476	0.604127	-0.518476	0.604127	15	15	0.623594		219	246	99
2908.65	3438.02	0.360627	205	230	100	-0.218218	0.827259	-0.218218	0.827259	14	15	0.846694		245	220	100	0.518476	0.604127	0.518476	0.604127	15	15	0.623594		231	234	111	-0.0622171	0.95039	-0.0622171	0.95039	15	15	0.967417		219	246	99	-0.559954	0.575511	-0.559954	0.575511	15	15	0.594884		219	246	99
2910.58	3435.74	0.360866	206	229	101	-0.174574	0.861414	-0.174574	0.861414	14	15	0.880478		245	220	100	0.518476	0.604127	0.518476	0.604127	15	15	0.623594		232	233	112	-0.020739	0.983454	-0.020739	0.983454	15	15	1		218	247	98	-0.601432	0.547553	-0.601432	0.547553	15	15	0.566774		219	246	99
2912.51	3433.46	0.361105	206	229	101	-0.174574	0.861414	-0.174574	0.861414	14	15	0.880478		244	221	101	0.476998	0.633364	0.476998	0.633364	15	15	0.65287		232	233	112	-0.020739	0.983454	-0.020739	0.983454	15	15	1		218	247	98	-0.601432	0.547553	-0.601432	0.547553	15	15	0.566774		220	245	100
2914.44	3431.19	0.361345	207	228	102	-0.130931	0.89583	-0.130931	0.89583	14	15	0.914475		244	221	101	0.476998	0.633364	0.476998	0.633364	15	15	0.65287		232	233	112	-0.020739	0.983454	-0.020739	0.983454	15	15	1		218	247	98	-0.601432	0.547553	-0.601432	0.547553	15	15	0.566774		221	244	101
2916.37	3428.92	0.361584	208	227	103	-0.0872872	0.930443	-0.0872872	0.930443	14	15	0.948623		243	222	102	0.43552	0.663186	0.43552	0.663186	15	15	0.682674		234	231	111	0.0622171	0.95039	0.0622171	0.95039	15	15	0.967417		217	248	97	-0.64291	0.520283	-0.64291	0.520283	15	15	0.539299		221	244	101
2918.3	3426.65	0.361823	208	227	103	-0.0872872	0.930443	-0.0872872	0.930443	14	15	0.948623		243	222	102	0.43552	0.663186	0.43552	0.663186	15	15	0.682674		233	232	112	0.020739	0.983454	0.020739	0.983454	15	15	1		219	246	99	-0.559954	0.575511	-0.559954	0.575511	15	15	0.594884		220	245	100
2920.23	3424.39	0.362062	208	227	103	-0.0872872	0.930443	-0.0872872	0.930443	14	15	0.948623		244	221	101	0.476998	0.633364	0.476998	0.633364	15	15	0.65287		233	232	112	0.020739	0.983454	0.020739	0.983454	15	15	1		219	246	99	-0.559954	0.575511	-0.559954	0.575511	15	15	0.594884		221	244	101
2922.16	3422.13	0.362301	209	226	104	-0.0436436	0.965189	-0.0436436	0.965189	14	15	0.982865		244	221	101	0.476998	0.633364	0.476998	0.633364	15	15	0.65287		234	231	111	0.0622171	0.95039	0.0622171	0.95039	15	15	0.967417		219	246	99	-0.559954	0.575511	-0.559954	0.575511	15	15	0.594884		221	244	101
2924.09	3419.87	0.36254	207	228	102	-0.130931	0.89583	-0.130931	0.89583	14	15	0.914475		244	221	101	0.476998	0.633364	0.476998	0.633364	15	15	0.65287		234	231	111	0.0622171	0.95039	0.0622171	0.95039	15	15	0.967417		217	248	97	-0.64291	0.520283	-0.64291	0.520283	15	15	0.539299		221	244	101
2926.01	3417.62	0.362779	205	230	100	-0.218218	0.827259	-0.218218	0.827259	14	15	0.846694		244	221	101	0.476998	0.633364	0.476998	0.633364	15	15	0.65287		234	231	111	0.0622171	0.95039	0.0622171	0.95039	15	15	0.967417		216	249	96	-0.684388	0.493731	-0.684388	0.493731	15	15	0.512486		220	245	100
2927.94	3415.37	0.363019	205	230	100	-0.218218	0.827259	-0.218218	0.827259	14	15	0.846694		245	220	100	0.518476	0.604127	0.518476	0.604127	15	15	0.623594		234	231	111	0.0622171	0.95039	0.0622171	0.95039	15	15	0.967417		216	249	96	-0.684388	0.493731	-0.684388	0.493731	15	15	0.512486		220	245	100
2929.87	3413.12	0.363258	204	231	99	-0.261861	0.793428	-0.261861	0.793428	14	15	0.813179		245	220	100	0.518476	0.604127	0.518476	0.604127	15	15	0.623594		234	231	111	0.0622171	0.95039	0.0622171	0.95039	15	15	0.967417		216	249	96	-0.684388	0.493731	-0.684388	0.493731	15	15	0.512486		220	245	100
2931.8	3410.87	0.363497	203	232	98	-0.305505	0.759982	-0.305505	0.759982	14	15	0.779995		245	220	100	0.518476	0.604127	0.518476	0.604127	15	15	0.623594		234	231	111	0.0622171	0.95039	0.0622171	0.95039	15	15	0.967417		216	249	96	-0.684388	0.493731	-0.684388	0.493731	15	15	0.512486		220	245	100
2933.73	3408.63	0.363736	204	231	99	-0.261861	0.793428	-0.261861	0.793428	14	15	0.813179		246	219	99	0.559954	0.575511	0.559954	0.575511	15	15	0.594884		234	231	111	0.0622171	0.95039	0.0622171	0.95039	15	15	0.967417		216	249	96	-0.684388	0.493731	-0.684388	0.493731	15	15	0.512486		219	246	99
2935.66	3406.39	0.363975	204	231	99	-0.261861	0.793428	-0.261861	0.793428	14	15	0.813179		246	219	99	0.559954	0.575511	0.559954	0.575511	15	15	0.594884		233	232	112	0.020739	0.983454	0.020739	0.983454	15	15	1		216	249	96	-0.684388	0.493731	-0.684388	0.493731	15	15	0.512486		221	244	101
2937.59	3404.15	0.364214	204	231	99	-0.261861	0.793428	-0.261861	0.793428	14	15	0.813179		246	219	99	0.559954	0.575511	0.559954	0.575511	15	15	0.594884		233	232	112	0.020739	0.983454	0.020739	0.983454	15	15	1		216	249	96	-0.684388	0.493731	-0.684388	0.493731	15	15	0.512486		221	244	101
2939.52	3401.92	0.364453	203	232	98	-0.305505	0.759982	-0.305505	0.759982	14	15	0.779995		246	219	99	0.559954	0.575511	0.559954	0.575511	15	15	0.594884		233	232	112	0.020739	0.983454	0.020739	0.983454	15	15	1		216	249	96	-0.684388	0.493731	-0.684388	0.493731	15	15	0.512486		220	245	100
2941.44	3399.69	0.364693	203	232	98	-0.305505	0.759982	-0.305505	0.759982	14	15	0.779995		246	219	99	0.559954	0.575511	0.559954	0.575511	15	15	0.594884		233	232	112	0.020739	0.983454	0.020739	0.983454	15	15	1		216	249	96	-0.684388	0.493731	-0.684388	0.493731	15	15	0.512486		221	244	101
2943.37	3397.46	0.364932	203	232	98	-0.305505	0.759982	-0.305505	0.759982	14	15	0.779995		246	219	99	0.559954	0.575511	0.559954	0.575511	15	15	0.594884		234	231	111	0.0622171	0.95039	0.0622171	0.95039	15	15	0.967417		216	249	96	-0.684388	0.493731	-0.684388	0.493731	15	15	0.512486		219	246	99
2945.3	3395.24	0.365171	204	231	99	-0.261861	0.793428	-0.261861	0.793428	14	15	0.813179		246	219	99	0.559954	0.575511	0.559954	0.575511	15	15	0.594884		234	231	111	0.0622171	0.95039	0.0622171	0.95039	15	15	0.967417		216	249	96	-0.684388	0.493731	-0.684388	0.493731	15	15	0.512486		218	247	98
2947.23	3393.02	0.36541	205	230	100	-0.218218	0.827259	-0.218218	0.827259	14	15	0.846694		246	219	99	0.559954	0.575511	0.559954	0.575511	15	15	0.594884		234	231	111	0.0622171	0.95039	0.0622171	0.95039	15	15	0.967417		216	249	96	-0.684388	0.493731	-0.684388	0.493731	15	15	0.512486		220	245	100
2949.16	3390.8	0.365649	205	230	100	-0.218218	0.827259	-0.218218	0.827259	14	15	0.846694		246	219	99	0.559954	0.575511	0.559954	0.575511	15	15	0.594884		235	230	110	0.103695	0.917411	0.103695	0.917411	15	15	0.934887		216	249	96	-0.684388	0.493731	-0.684388	0.493731	15	15	0.512486		220	245	100
2951.09	3388.58	0.365888	205	230	100	-0.218218	0.827259	-0.218218	0.827259	14	15	0.846694		246	219	99	0.559954	0.575511	0.559954	0.575511	15	15	0.594884		236	229	109	0.145173	0.884574	0.145173	0.884574	15	15	0.902462		216	249	96	-0.684388	0.493731	-0.684388	0.493731	15	15	0.512486		218	247	98
2953.02	3386.37	0.366127	204	231	99	-0.261861	0.793428	-0.261861	0.793428	14	15	0.813179		245	220	100	0.518476	0.604127	0.518476	0.604127	15	15	0.623594		236	229	109	0.145173	0.884574	0.145173	0.884574	15	15	0.902462		217	248	97	-0.64291	0.520283	-0.64291	0.520283	15	15	0.539299		219	246	99
2954.95	3384.16	0.366367	203	232	98	-0.305505	0.759982	-0.305505	0.759982	14	15	0.779995		245	220	100	0.518476	0.604127	0.518476	0.604127	15	15	0.623594		236	229	109	0.145173	0.884574	0.145173	0.884574	15	15	0.902462		217	248	97	-0.64291	0.520283	-0.64291	0.520283	15	15	0.539299		220	245	100
2956.87	3381.95	0.366606	203	232	98	-0.305505	0.759982	-0.305505	0.759982	14	15	0.779995		246	219	99	0.559954	0.575511	0.559954	0.575511	15	15	0.594884		236	229	109	0.145173	0.884574	0.145173	0.884574	15	15	0.902462		217	248	97	-0.64291	0.520283	-0.64291	0.520283	15	15	0.539299		220	245	100
2958.8	3379.74	0.366845	204	231	99	-0.261861	0.793428	-0.261861	0.793428	14	15	0.813179		246	219	99	0.559954	0.575511	0.559954	0.575511	15	15	0.594884		236	229	109	0.145173	0.884574	0.145173	0.884574	15	15	0.902462		218	247	98	-0.601432	0.547553	-0.601432	0.547553	15	15	0.566774		219	246	99
2960.73	3377.54	0.367084	203	232	98	-0.305505	0.759982	-0.305505	0.759982	14	15	0.779995		247	218	98	0.601432	0.547553	0.601432	0.547553	15	15	0.566774		235	230	110	0.103695	0.917411	0.103695	0.917411	15	15	0.934887		217	248	97	-0.64291	0.520283	-0.64291	0.520283	15	15	0.539299		220	245	100
2962.66	3375.34	0.367323	204	231	99	-0.261861	0.793428	-0.261861	0.793428	14	15	0.813179		247	218	98	0.601432	0.547553	0.601432	0.547553	15	15	0.566774		236	229	109	0.145173	0.884574	0.145173	0.884574	15	15	0.902462		218	247	98	-0.601432	0.547553	-0.601432	0.547553	15	15	0.566774		220	245	100
2964.59	3373.15	0.367562	204	231	99	-0.261861	0.793428	-0.261861	0.793428	14	15	0.813179		247	218	98	0.601432	0.547553	0.601432	0.547553	15	15	0.566774		236	229	109	0.145173	0.884574	0.145173	0.884574	15	15	0.902462		217	248	97	-0.64291	0.520283	-0.64291	0.520283	15	15	0.539299		219	246	99
2966.52	3370.95	0.367801	204	231	99	-0.261861	0.793428	-0.261861	0.793428	14	15	0.813179		247	218	98	0.601432	0.547553	0.601432	0.547553	15	15	0.566774		237	228	108	0.186651	0.851934	0.186651	0.851934	15	15	0.870194		217	248	97	-0.64291	0.520283	-0.64291	0.520283	15	15	0.539299		218	247	98
2968.45	3368.76	0.368041	205	230	100	-0.218218	0.827259	-0.218218	0.827259	14	15	0.846694		246	219	99	0.559954	0.575511	0.559954	0.575511	15	15	0.594884		237	228	108	0.186651	0.851934	0.186651	0.851934	15	15	0.870194		217	248	97	-0.64291	0.520283	-0.64291	0.520283	15	15	0.539299		217	248	97
2970.38	3366.58	0.36828	204	231	99	-0.261861	0.793428	-0.261861	0.793428	14	15	0.813179		248	217	97	0.64291	0.520283	0.64291	0.520283	15	15	0.539299		237	228	108	0.186651	0.851934	0.186651	0.851934	15	15	0.870194		217	248	97	-0.64291	0.520283	-0.64291	0.520283	15	15	0.539299		215	250	95
2972.31	3364.39	0.368519	203	232	98	-0.305505	0.759982	-0.305505	0.759982	14	15	0.779995		249	216	96	0.684388	0.493731	0.684388	0.493731	15	15	0.512486		237	228	108	0.186651	0.851934	0.186651	0.851934	15	15	0.870194		216	249	96	-0.684388	0.493731	-0.684388	0.493731	15	15	0.512486		216	249	96
2974.23	3362.21	0.368758	203	232	98	-0.305505	0.759982	-0.305505	0.759982	14	15	0.779995		248	217	97	0.64291	0.520283	0.64291	0.520283	15	15	0.539299		237	228	108	0.186651	0.851934	0.186651	0.851934	15	15	0.870194		216	249	96	-0.684388	0.493731	-0.684388	0.493731	15	15	0.512486		216	249	96
2976.16	3360.03	0.368997	203	232	98	-0.305505	0.759982	-0.305505	0.759982	14	15	0.779995		249	216	96	0.684388	0.493731	0.684388	0.493731	15	15	0.512486		236	229	109	0.145173	0.884574	0.145173	0.884574	15	15	0.902462		217	248	97	-0.64291	0.520283	-0.64291	0.520283	15	15	0.539299		215	250	95
2978.09	3357.85	0.369236	203	232	98	-0.305505	0.759982	-0.305505	0.759982	14	15	0.779995		249	216	96	0.684388	0.493731	0.684388	0.493731	15	15	0.512486		236	229	109	0.145173	0.884574	0.145173	0.884574	15	15	0.902462		217	248	97	-0.64291	0.520283	-0.64291	0.520283	15	15	0.539299		216	249	96
2980.02	3355.68	0.369475	204	231	99	-0.261861	0.793428	-0.261861	0.793428	14	15	0.813179		250	215	95	0.725866	0.467921	0.725866	0.467921	15	15	0.486365		235	230	110	0.103695	0.917411	0.103695	0.917411	15	15	0.934887		217	248	97	-0.64291	0.520283	-0.64291	0.520283	15	15	0.539299		215	250	95
2981.95	3353.51	0.369715	205	230	100	-0.218218	0.827259	-0.218218	0.827259	14	15	0.846694		249	216	96	0.684388	0.493731	0.684388	0.493731	15	15	0.512486		236	229	109	0.145173	0.884574	0.145173	0.884574	15	15	0.902462		217	248	97	-0.64291	0.520283	-0.64291	0.520283	15	15	0.539299		216	249	96
2983.88	3351.34	0.369954	205	230	100	-0.218218	0.827259	-0.218218	0.827259	14	15	0.846694		248	217	97	0.64291	0.520283	0.64291	0.520283	15	15	0.539299		235	230	110	0.103695	0.917411	0.103695	0.917411	15	15	0.934887		217	248	97	-0.64291	0.520283	-0.64291	0.520283	15	15	0.539299		216	249	96
2985.81	3349.18	0.370193	205	230	100	-0.218218	0.827259	-0.218218	0.827259	14	15	0.846694		248	217	97	0.64291	0.520283	0.64291	0.520283	15	15	0.539299		236	229	109	0.145173	0.884574	0.145173	0.884574	15	15	0.902462		217	248	97	-0.64291	0.520283	-0.64291	0.520283	15	15	0.539299		216	249	96
2987.74	3347.02	0.370432	204	231	99	-0.261861	0.793428	-0.261861	0.793428	14	15	0.813179		249	216	96	0.684388	0.493731	0.684388	0.493731	15	15	0.512486		236	229	109	0.145173	0.884574	0.145173	0.884574	15	15	0.902462		215	250	95	-0.725866	0.467921	-0.725866	0.467921	15	15	0.486365		217	248	97
2989.66	3344.86	0.370671	203	232	98	-0.305505	0.759982	-0.305505	0.759982	14	15	0.779995		250	215	95	0.725866	0.467921	0.725866	0.467921	15	15	0.486365		236	229	109	0.145173	0.884574	0.145173	0.884574	15	15	0.902462		215	250	95	-0.725866	0.467921	-0.725866	0.467921	15	15	0.486365		215	250	95
2991.59	3342.7	0.37091	204	231	99	-0.261861	0.793428	-0.261861	0.793428	14	15	0.813179		249	216	96	0.684388	0.493731	0.684388	0.493731	15	15	0.512486		237	228	108	0.186651	0.851934	0.186651	0.851934	15	15	0.870194		217	248	97	-0.64291	0.520283	-0.64291	0.520283	15	15	0.539299		214	251	94
2993.52	3340.55	0.371149	204	231	99	-0.261861	0.793428	-0.261861	0.793428	14	15	0.813179		248	217	97	0.64291	0.520283	0.64291	0.520283	15	15	0.539299		238	227	107	0.228129	0.819546	0.228129	0.819546	15	15	0.838135		217	248	97	-0.64291	0.520283	-0.64291	0.520283	15	15	0.539299		213	252	93
2995.45	3338.4	0.371389	203	232	98	-0.305505	0.759982	-0.305505	0.759982	14	15	0.779995		248	217	97	0.64291	0.520283	0.64291	0.520283	15	15	0.539299		238	227	107	0.228129	0.819546	0.228129	0.819546	15	15	0.838135		217	248	97	-0.64291	0.520283	-0.64291	0.520283	15	15	0.539299		214	251	94
2997.38	3336.25	0.371628	204	231	99	-0.261861	0.793428	-0.261861	0.793428	14	15	0.813179		248	217	97	0.64291	0.520283	0.64291	0.520283	15	15	0.539299		238	227	107	0.228129	0.819546	0.228129	0.819546	15	15	0.838135		218	247	98	-0.601432	0.547553	-0.601432	0.547553	15	15	0.566774		212	253	92
2999.31	3334.1	0.371867	204	231	99	-0.261861	0.793428	-0.261861	0.793428	14	15	0.813179		249	216	96	0.684388	0.493731	0.684388	0.493731	15	15	0.512486		237	228	108	0.186651	0.851934	0.186651	0.851934	15	15	0.870194		219	246	99	-0.559954	0.575511	-0.559954	0.575511	15	15	0.594884		212	253	92
3001.24	3331.96	0.372106	201	234	96	-0.392792	0.694473	-0.392792	0.694473	14	15	0.71483		250	215	95	0.725866	0.467921	0.725866	0.467921	15	15	0.486365		237	228	108	0.186651	0.851934	0.186651	0.851934	15	15	0.870194		219	246	99	-0.559954	0.575511	-0.559954	0.575511	15	15	0.594884		212	253	92
3003.17	3329.82	0.372345	203	232	98	-0.305505	0.759982	-0.305505	0.759982	14	15	0.779995		249	216	96	0.684388	0.493731	0.684388	0.493731	15	15	0.512486		237	228	108	0.186651	0.851934	0.186651	0.851934	15	15	0.870194		220	245	100	-0.518476	0.604127	-0.518476	0.604127	15	15	0.623594		211	254	91
3005.1	3327.68	0.372584	204	231	99	-0.261861	0.793428	-0.261861	0.793428	14	15	0.813179		250	215	95	0.725866	0.467921	0.725866	0.467921	15	15	0.486365		237	228	108	0.186651	0.851934	0.186651	0.851934	15	15	0.870194		221	244	101	-0.476998	0.633364	-0.476998	0.633364	15	15	0.65287		211	254	91
3007.02	3325.55	0.372823	205	230	100	-0.218218	0.827259	-0.218218	0.827259	14	15	0.846694		249	216	96	0.684388	0.493731	0.684388	0.493731	15	15	0.512486		236	229	109	0.145173	0.884574	0.145173	0.884574	15	15	0.902462		221	244	101	-0.476998	0.633364	-0.476998	0.633364	15	15	0.65287		212	253	92
3008.95	3323.42	0.373063	204	231	99	-0.261861	0.793428	-0.261861	0.793428	14	15	0.813179		249	216	96	0.684388	0.493731	0.684388	0.493731	15	15	0.512486		236	229	109	0.145173	0.884574	0.145173	0.884574	15	15	0.902462		221	244	101	-0.476998	0.633364	-0.476998	0.633364	15	15	0.65287		212	253	92
3010.88	3321.29	0.373302	204	231	99	-0.261861	0.793428	-0.261861	0.793428	14	15	0.813179		249	216	96	0.684388	0.493731	0.684388	0.493731	15	15	0.512486		238	227	107	0.228129	0.819546	0.228129	0.819546	15	15	0.838135		221	244	101	-0.476998	0.633364	-0.476998	0.633364	15	15	0.65287		212	253	92
3012.81	3319.16	0.373541	203	232	98	-0.305505	0.759982	-0.305505	0.759982	14	15	0.779995		249	216	96	0.684388	0.493731	0.684388	0.493731	15	15	0.512486		238	227	107	0.228129	0.819546	0.228129	0.819546	15	15	0.838135		221	244	101	-0.476998	0.633364	-0.476998	0.633364	15	15	0.65287		209	256	89
3014.74	3317.04	0.37378	204	231	99	-0.261861	0.793428	-0.261861	0.793428	14	15	0.813179		251	214	94	0.767344	0.442877	0.767344	0.442877	15	15	0.460959		239	226	106	0.269607	0.787462	0.269607	0.787462	15	15	0.806334		222	243	102	-0.43552	0.663186	-0.43552	0.663186	15	15	0.682674		210	255	90
3016.67	3314.92	0.374019	204	231	99	-0.261861	0.793428	-0.261861	0.793428	14	15	0.813179		249	216	96	0.684388	0.493731	0.684388	0.493731	15	15	0.512486		238	227	107	0.228129	0.819546	0.228129	0.819546	15	15	0.838135		219	246	99	-0.559954	0.575511	-0.559954	0.575511	15	15	0.594884		209	256	89
3018.6	3312.8	0.374258	203	232	98	-0.305505	0.759982	-0.305505	0.759982	14	15	0.779995		252	213	93	0.808822	0.418618	0.808822	0.418618	15	15	0.436289		236	229	109	0.145173	0.884574	0.145173	0.884574	15	15	0.902462		223	242	103	-0.394042	0.693551	-0.394042	0.693551	15	15	0.712965		211	254	91
3020.53	3310.68	0.374497	206	229	101	-0.174574	0.861414	-0.174574	0.861414	14	15	0.880478		252	213	93	0.808822	0.418618	0.808822	0.418618	15	15	0.436289		236	229	109	0.145173	0.884574	0.145173	0.884574	15	15	0.902462		224	241	104	-0.352564	0.724416	-0.352564	0.724416	15	15	0.743702		213	252	93
3022.45	3308.57	0.374737	206	229	101	-0.174574	0.861414	-0.174574	0.861414	14	15	0.880478		251	214	94	0.767344	0.442877	0.767344	0.442877	15	15	0.460959		238	227	107	0.228129	0.819546	0.228129	0.819546	15	15	0.838135		227	238	107	-0.228129	0.819546	-0.228129	0.819546	15	15	0.838135		216	249	96
3024.38	3306.46	0.374976	204	231	99	-0.261861	0.793428	-0.261861	0.793428	14	15	0.813179		251	214	94	0.767344	0.442877	0.767344	0.442877	15	15	0.460959		240	225	105	0.311086	0.755736	0.311086	0.755736	15	15	0.77484		227	238	107	-0.228129	0.819546	-0.228129	0.819546	15	15	0.838135		216	249	96
3026.31	3304.35	0.375215	202	233	97	-0.349149	0.726978	-0.349149	0.726978	14	15	0.747192		251	214	94	0.767344	0.442877	0.767344	0.442877	15	15	0.460959		238	227	107	0.228129	0.819546	0.228129	0.819546	15	15	0.838135		229	236	109	-0.145173	0.884574	-0.145173	0.884574	15	15	0.902462		217	248	97
3028.24	3302.25	0.375454	202	233	97	-0.349149	0.726978	-0.349149	0.726978	14	15	0.747192		252	213	93	0.808822	0.418618	0.808822	0.418618	15	15	0.436289		238	227	107	0.228129	0.819546	0.228129	0.819546	15	15	0.838135		232	233	112	-0.020739	0.983454	-0.020739	0.983454	15	15	1		219	246	99
3030.17	3300.14	0.375693	202	233	97	-0.349149	0.726978	-0.349149	0.726978	14	15	0.747192		253	212	92	0.8503	0.395159	0.8503	0.395159	15	15	0.412376		243	222	102	0.43552	0.663186	0.43552	0.663186	15	15	0.682674		232	233	112	-0.020739	0.983454	-0.020739	0.983454	15	15	1		220	245	100
3032.1	3298.05	0.375932	202	233	97	-0.349149	0.726978	-0.349149	0.726978	14	15	0.747192		248	217	97	0.64291	0.520283	0.64291	0.520283	15	15	0.539299		239	226	106	0.269607	0.787462	0.269607	0.787462	15	15	0.806334		231	234	111	-0.0622171	0.95039	-0.0622171	0.95039	15	15	0.967417		222	243	102
3034.03	3295.95	0.376171	203	232	98	-0.305505	0.759982	-0.305505	0.759982	14	15	0.779995		248	217	97	0.64291	0.520283	0.64291	0.520283	15	15	0.539299		237	228	108	0.186651	0.851934	0.186651	0.851934	15	15	0.870194		231	234	111	-0.0622171	0.95039	-0.0622171	0.95039	15	15	0.967417		222	243	102
3035.96	3293.85	0.376411	204	231	99	-0.261861	0.793428	-0.261861	0.793428	14	15	0.813179		250	215	95	0.725866	0.467921	0.725866	0.467921	15	15	0.486365		236	229	109	0.145173	0.884574	0.145173	0.884574	15	15	0.902462		233	232	112	0.020739	0.983454	0.020739	0.983454	15	15	1		221	244	101
3037.89	3291.76	0.37665	203	232	98	-0.305505	0.759982	-0.305505	0.759982	14	15	0.779995		249	216	96	0.684388	0.493731	0.684388	0.493731	15	15	0.512486		237	228	108	0.186651	0.851934	0.186651	0.851934	15	15	0.870194		234	231	111	0.0622171	0.95039	0.0622171	0.95039	15	15	0.967417		221	244	101
3039.81	3289.67	0.376889	205	230	100	-0.218218	0.827259	-0.218218	0.827259	14	15	0.846694		251	214	94	0.767344	0.442877	0.767344	0.442877	15	15	0.460959		238	227	107	0.228129	0.819546	0.228129	0.819546	15	15	0.838135		235	230	110	0.103695	0.917411	0.103695	0.917411	15	15	0.934887		223	242	103
3041.74	3287.59	0.377128	208	227	103	-0.0872872	0.930443	-0.0872872	0.930443	14	15	0.948623		250	215	95	0.725866	0.467921	0.725866	0.467921	15	15	0.486365		238	227	107	0.228129	0.819546	0.228129	0.819546	15	15	0.838135		236	229	109	0.145173	0.884574	0.145173	0.884574	15	15	0.902462		224	241	104
3043.67	3285.51	0.377367	208	227	103	-0.0872872	0.930443	-0.0872872	0.930443	14	15	0.948623		251	214	94	0.767344	0.442877	0.767344	0.442877	15	15	0.460959		236	229	109	0.145173	0.884574	0.145173	0.884574	15	15	0.902462		238	227	107	0.228129	0.819546	0.228129	0.819546	15	15	0.838135		223.5	241.5	103.5
3045.6	3283.42	0.377606	209	226	104	-0.0436436	0.965189	-0.0436436	0.965189	14	15	0.982865		251	214	94	0.767344	0.442877	0.767344	0.442877	15	15	0.460959		235	230	110	0.103695	0.917411	0.103695	0.917411	15	15	0.934887		239	226	106	0.269607	0.787462	0.269607	0.787462	15	15	0.806334		222	243	102
3047.53	3281.35	0.377845	209	226	104	-0.0436436	0.965189	-0.0436436	0.965189	14	15	0.982865		251	214	94	0.767344	0.442877	0.767344	0.442877	15	15	0.460959		235	230	110	0.103695	0.917411	0.103695	0.917411	15	15	0.934887		237	228	108	0.186651	0.851934	0.186651	0.851934	15	15	0.870194		224	241	104
3049.46	3279.27	0.378085	211	224	104	0.0436436	0.965189	0.0436436	0.965189	14	15	0.982865		248	217	97	0.64291	0.520283	0.64291	0.520283	15	15	0.539299		234	231	111	0.0622171	0.95039	0.0622171	0.95039	15	15	0.967417		237	228	108	0.186651	0.851934	0.186651	0.851934	15	15	0.870194		228	237	108
3051.39	3277.2	0.378324	213	222	102	0.130931	0.89583	0.130931	0.89583	14	15	0.914475		248	217	97	0.64291	0.520283	0.64291	0.520283	15	15	0.539299		236	229	109	0.145173	0.884574	0.145173	0.884574	15	15	0.902462		237	228	108	0.186651	0.851934	0.186651	0.851934	15	15	0.870194		226	239	106
3053.32	3275.13	0.378563	210	225	105	0	1	0	1	14	15	1.01714		245	220	100	0.518476	0.604127	0.518476	0.604127	15	15	0.623594		237	228	108	0.186651	0.851934	0.186651	0.851934	15	15	0.870194		239	226	106	0.269607	0.787462	0.269607	0.787462	15	15	0.806334		226	239	106
3055.24	3273.06	0.378802	212	223	103	0.0872872	0.930443	0.0872872	0.930443	14	15	0.948623		249	216	96	0.684388	0.493731	0.684388	0.493731	15	15	0.512486		239	226	106	0.269607	0.787462	0.269607	0.787462	15	15	0.806334		244	221	101	0.476998	0.633364	0.476998	0.633364	15	15	0.65287		226	239	106
3057.17	3271	0.379041	212	223	103	0.0872872	0.930443	0.0872872	0.930443	14	15	0.948623		258	207	87	1.05769	0.290197	1.05769	0.290197	15	15	0.304591		238	227	107	0.228129	0.819546	0.228129	0.819546	15	15	0.838135		251	214	94	0.767344	0.442877	0.767344	0.442877	15	15	0.460959		231	234	111
3059.1	3268.93	0.37928	210	225	105	0	1	0	1	14	15	1.01714		259	206	86	1.09917	0.271695	1.09917	0.271695	15	15	0.285441		245	220	100	0.518476	0.604127	0.518476	0.604127	15	15	0.623594		250	215	95	0.725866	0.467921	0.725866	0.467921	15	15	0.486365		231	234	111
3061.03	3266.87	0.379519	201	234	96	-0.392792	0.694473	-0.392792	0.694473	14	15	0.71483		257	208	88	1.01621	0.309529	1.01621	0.309529	15	15	0.324548		248	217	97	0.64291	0.520283	0.64291	0.520283	15	15	0.539299		245	220	100	0.518476	0.604127	0.518476	0.604127	15	15	0.623594		241	224	104
3062.96	3264.82	0.379759	191	244	86	-0.829228	0.406976	-0.829228	0.406976	14	15	0.425262		238	227	107	0.228129	0.819546	0.228129	0.819546	15	15	0.838135		240	225	105	0.311086	0.755736	0.311086	0.755736	15	15	0.77484		228	237	108	-0.186651	0.851934	-0.186651	0.851934	15	15	0.870194		248	217	97
3064.89	3262.76	0.379998	186	249	81	-1.04745	0.294895	-1.04745	0.294895	14	15	0.310143		222	243	102	-0.43552	0.663186	-0.43552	0.663186	15	15	0.682674		234	231	111	0.0622171	0.95039	0.0622171	0.95039	15	15	0.967417		226	239	106	-0.269607	0.787462	-0.269607	0.787462	15	15	0.806334		260	205	85
3066.82	3260.71	0.380237	189	246	84	-0.916515	0.359397	-0.916515	0.359397	14	15	0.376588		221	244	101	-0.476998	0.633364	-0.476998	0.633364	15	15	0.65287		236	229	109	0.145173	0.884574	0.145173	0.884574	15	15	0.902462		224	241	104	-0.352564	0.724416	-0.352564	0.724416	15	15	0.743702		262	203	83
3068.75	3258.66	0.380476	182	253	77	-1.22202	0.221701	-1.22202	0.221701	14	15	0.234007		220	245	100	-0.518476	0.604127	-0.518476	0.604127	15	15	0.623594		235	230	110	0.103695	0.917411	0.103695	0.917411	15	15	0.934887		223	242	103	-0.394042	0.693551	-0.394042	0.693551	15	15	0.712965		251	214	94
3070.68	3256.61	0.380715	174	261	69	-1.57117	0.116144	-1.57117	0.116144	14	15	0.122524		211	254	91	-0.891778	0.372512	-0.891778	0.372512	15	15	0.389233		234	231	111	0.0622171	0.95039	0.0622171	0.95039	15	15	0.967417		227	238	107	-0.228129	0.819546	-0.228129	0.819546	15	15	0.838135		244	221	101
3072.6	3254.57	0.380954	172	263	67	-1.65846	0.0972264	-1.65846	0.0972264	14	15	0.102309		205	260	85	-1.14065	0.254018	-1.14065	0.254018	15	15	0.267097		225	240	105	-0.311086	0.755736	-0.311086	0.755736	15	15	0.77484		226	239	106	-0.269607	0.787462	-0.269607	0.787462	15	15	0.806334		232	233	112
3074.53	3252.53	0.381193	177	258	72	-1.44024	0.149801	-1.44024	0.149801	14	15	0.158309		202	263	82	-1.26508	0.205843	-1.26508	0.205843	15	15	0.216857		224	241	104	-0.352564	0.724416	-0.352564	0.724416	15	15	0.743702		230	235	110	-0.103695	0.917411	-0.103695	0.917411	15	15	0.934887		229	236	109
3076.46	3250.49	0.381433	180	255	75	-1.30931	0.190431	-1.30931	0.190431	14	15	0.201205		207	258	87	-1.05769	0.290197	-1.05769	0.290197	15	15	0.304591		226	239	106	-0.269607	0.787462	-0.269607	0.787462	15	15	0.806334		235	230	110	0.103695	0.917411	0.103695	0.917411	15	15	0.934887		229	236	109
3078.39	3248.45	0.381672	176	259	71	-1.48388	0.137841	-1.48388	0.137841	14	15	0.145619		207	258	87	-1.05769	0.290197	-1.05769	0.290197	15	15	0.304591		223	242	103	-0.394042	0.693551	-0.394042	0.693551	15	15	0.712965		226	239	106	-0.269607	0.787462	-0.269607	0.787462	15	15	0.806334		224	241	104
3080.32	3246.42	0.381911	175	260	70	-1.52753	0.126631	-1.52753	0.126631	14	15	0.1337		206	259	86	-1.09917	0.271695	-1.09917	0.271695	15	15	0.285441		222	243	102	-0.43552	0.663186	-0.43552	0.663186	15	15	0.682674		221	244	101	-0.476998	0.633364	-0.476998	0.633364	15	15	0.65287		222	243	102
3082.25	3244.39	0.38215	181	254	76	-1.26566	0.205634	-1.26566	0.205634	14	15	0.217176		207	258	87	-1.05769	0.290197	-1.05769	0.290197	15	15	0.304591		218	247	98	-0.601432	0.547553	-0.601432	0.547553	15	15	0.566774		225	240	105	-0.311086	0.755736	-0.311086	0.755736	15	15	0.77484		228	237	108
3084.18	3242.36	0.382389	186	249	81	-1.04745	0.294895	-1.04745	0.294895	14	15	0.310143		214	251	94	-0.767344	0.442877	-0.767344	0.442877	15	15	0.460959		221	244	101	-0.476998	0.633364	-0.476998	0.633364	15	15	0.65287		224	241	104	-0.352564	0.724416	-0.352564	0.724416	15	15	0.743702		223	242	103
3086.11	3240.33	0.382628	185	250	80	-1.09109	0.275234	-1.09109	0.275234	14	15	0.289776		213	252	93	-0.808822	0.418618	-0.808822	0.418618	15	15	0.436289		222	243	102	-0.43552	0.663186	-0.43552	0.663186	15	15	0.682674		223	242	103	-0.394042	0.693551	-0.394042	0.693551	15	15	0.712965		217	248	97
3088.03	3238.31	0.382867	187	248	82	-1.0038	0.315475	-1.0038	0.315475	14	15	0.331405		220	245	100	-0.518476	0.604127	-0.518476	0.604127	15	15	0.623594		226	239	106	-0.269607	0.787462	-0.269607	0.787462	15	15	0.806334		225	240	105	-0.311086	0.755736	-0.311086	0.755736	15	15	0.77484		227	238	107
3089.96	3236.28	0.383107	190	245	85	-0.872872	0.382734	-0.872872	0.382734	14	15	0.400494		220	245	100	-0.518476	0.604127	-0.518476	0.604127	15	15	0.623594		228	237	108	-0.186651	0.851934	-0.186651	0.851934	15	15	0.870194		229	236	109	-0.145173	0.884574	-0.145173	0.884574	15	15	0.902462		225	240	105
3091.89	3234.27	0.383346	188	247	83	-0.960159	0.336976	-0.960159	0.336976	14	15	0.353554		215	250	95	-0.725866	0.467921	-0.725866	0.467921	15	15	0.486365		232	233	112	-0.020739	0.983454	-0.020739	0.983454	15	15	1		230	235	110	-0.103695	0.917411	-0.103695	0.917411	15	15	0.934887		224	241	104
3093.82	3232.25	0.383585	189	246	84	-0.916515	0.359397	-0.916515	0.359397	14	15	0.376588		217	248	97	-0.64291	0.520283	-0.64291	0.520283	15	15	0.539299		230	235	110	-0.103695	0.917411	-0.103695	0.917411	15	15	0.934887		235	230	110	0.103695	0.917411	0.103695	0.917411	15	15	0.934887		220	245	100
3095.75	3230.24	0.383824	186	249	81	-1.04745	0.294895	-1.04745	0.294895	14	15	0.310143		220	245	100	-0.518476	0.604127	-0.518476	0.604127	15	15	0.623594		229	236	109	-0.145173	0.884574	-0.145173	0.884574	15	15	0.902462		229	236	109	-0.145173	0.884574	-0.145173	0.884574	15	15	0.902462		222	243	102
3097.68	3228.22	0.384063	185	250	80	-1.09109	0.275234	-1.09109	0.275234	14	15	0.289776		214	251	94	-0.767344	0.442877	-0.767344	0.442877	15	15	0.460959		229	236	109	-0.145173	0.884574	-0.145173	0.884574	15	15	0.902462		223	242	103	-0.394042	0.693551	-0.394042	0.693551	15	15	0.712965		220	245	100
3099.61	3226.22	0.384302	183	252	78	-1.17838	0.238647	-1.17838	0.238647	14	15	0.251712		211	254	91	-0.891778	0.372512	-0.891778	0.372512	15	15	0.389233		222	243	102	-0.43552	0.663186	-0.43552	0.663186	15	15	0.682674		222	243	102	-0.43552	0.663186	-0.43552	0.663186	15	15	0.682674		217	248	97
3101.54	3224.21	0.384541	183	252	78	-1.17838	0.238647	-1.17838	0.238647	14	15	0.251712		208	257	88	-1.01621	0.309529	-1.01621	0.309529	15	15	0.324548		224	241	104	-0.352564	0.724416	-0.352564	0.724416	15	15	0.743702		217	248	97	-0.64291	0.520283	-0.64291	0.520283	15	15	0.539299		219	246	99
3103.46	3222.2	0.384781	179	256	74	-1.35295	0.176072	-1.35295	0.176072	14	15	0.186083		207	258	87	-1.05769	0.290197	-1.05769	0.290197	15	15	0.304591		229	236	109	-0.145173	0.884574	-0.145173	0.884574	15	15	0.902462		216	249	96	-0.684388	0.493731	-0.684388	0.493731	15	15	0.512486		214	251	94
3105.39	3220.2	0.38502	182	253	77	-1.22202	0.221701	-1.22202	0.221701	14	15	0.234007		212	253	92	-0.8503	0.395159	-0.8503	0.395159	15	15	0.412376		226	239	106	-0.269607	0.787462	-0.269607	0.787462	15	15	0.806334		220	245	100	-0.518476	0.604127	-0.518476	0.604127	15	15	0.623594		207	258	87
3107.32	3218.2	0.385259	185	250	80	-1.09109	0.275234	-1.09109	0.275234	14	15	0.289776		212	253	92	-0.8503	0.395159	-0.8503	0.395159	15	15	0.412376		228	237	108	-0.186651	0.851934	-0.186651	0.851934	15	15	0.870194		224	241	104	-0.352564	0.724416	-0.352564	0.724416	15	15	0.743702		213	252	93
3109.25	3216.21	0.385498	181	254	76	-1.26566	0.205634	-1.26566	0.205634	14	15	0.217176		219	246	99	-0.559954	0.575511	-0.559954	0.575511	15	15	0.594884		229	236	109	-0.145173	0.884574	-0.145173	0.884574	15	15	0.902462		228	237	108	-0.186651	0.851934	-0.186651	0.851934	15	15	0.870194		220	245	100
3111.18	3214.21	0.385737	180	255	75	-1.30931	0.190431	-1.30931	0.190431	14	15	0.201205		228	237	108	-0.186651	0.851934	-0.186651	0.851934	15	15	0.870194		232.5	232.5	112.5	0	1	0	1	15	15	1		228	237	108	-0.186651	0.851934	-0.186651	0.851934	15	15	0.870194		219	246	99
3113.11	3212.22	0.385976	181	254	76	-1.26566	0.205634	-1.26566	0.205634	14	15	0.217176		220	245	100	-0.518476	0.604127	-0.518476	0.604127	15	15	0.623594		225	240	105	-0.311086	0.755736	-0.311086	0.755736	15	15	0.77484		226	239	106	-0.269607	0.787462	-0.269607	0.787462	15	15	0.806334		218	247	98
3115.04	3210.23	0.386215	189	246	84	-0.916515	0.359397	-0.916515	0.359397	14	15	0.376588		218	247	98	-0.601432	0.547553	-0.601432	0.547553	15	15	0.566774		227	238	107	-0.228129	0.819546	-0.228129	0.819546	15	15	0.838135		220	245	100	-0.518476	0.604127	-0.518476	0.604127	15	15	0.623594		215	250	95
3116.97	3208.25	0.386455	182	253	77	-1.22202	0.221701	-1.22202	0.221701	14	15	0.234007		209	256	89	-0.974735	0.329693	-0.974735	0.329693	15	15	0.345311		220	245	100	-0.518476	0.604127	-0.518476	0.604127	15	15	0.623594		219	246	99	-0.559954	0.575511	-0.559954	0.575511	15	15	0.594884		211	254	91
3118.9	3206.26	0.386694	180	255	75	-1.30931	0.190431	-1.30931	0.190431	14	15	0.201205		205	260	85	-1.14065	0.254018	-1.14065	0.254018	15	15	0.267097		222	243	102	-0.43552	0.663186	-0.43552	0.663186	15	15	0.682674		216	249	96	-0.684388	0.493731	-0.684388	0.493731	15	15	0.512486		209	256	89
3120.82	3204.28	0.386933	185	250	80	-1.09109	0.275234	-1.09109	0.275234	14	15	0.289776		209	256	89	-0.974735	0.329693	-0.974735	0.329693	15	15	0.345311		228	237	108	-0.186651	0.851934	-0.186651	0.851934	15	15	0.870194		220	245	100	-0.518476	0.604127	-0.518476	0.604127	15	15	0.623594		222	243	102
3122.75	3202.3	0.387172	185	250	80	-1.09109	0.275234	-1.09109	0.275234	14	15	0.289776		212	253	92	-0.8503	0.395159	-0.8503	0.395159	15	15	0.412376		229	236	109	-0.145173	0.884574	-0.145173	0.884574	15	15	0.902462		226	239	106	-0.269607	0.787462	-0.269607	0.787462	15	15	0.806334		217	248	97
3124.68	3200.33	0.387411	191	244	86	-0.829228	0.406976	-0.829228	0.406976	14	15	0.425262		223	242	103	-0.394042	0.693551	-0.394042	0.693551	15	15	0.712965		234	231	111	0.0622171	0.95039	0.0622171	0.95039	15	15	0.967417		234	231	111	0.0622171	0.95039	0.0622171	0.95039	15	15	0.967417		221	244	101
3126.61	3198.35	0.38765	194	241	89	-0.698297	0.484992	-0.698297	0.484992	14	15	0.504539		229	236	109	-0.145173	0.884574	-0.145173	0.884574	15	15	0.902462		236	229	109	0.145173	0.884574	0.145173	0.884574	15	15	0.902462		232	233	112	-0.020739	0.983454	-0.020739	0.983454	15	15	1		220	245	100
3128.54	3196.38	0.387889	185	250	80	-1.09109	0.275234	-1.09109	0.275234	14	15	0.289776		214	251	94	-0.767344	0.442877	-0.767344	0.442877	15	15	0.460959		231	234	111	-0.0622171	0.95039	-0.0622171	0.95039	15	15	0.967417		223	242	103	-0.394042	0.693551	-0.394042	0.693551	15	15	0.712965		212	253	92
3130.47	3194.41	0.388129	179	256	74	-1.35295	0.176072	-1.35295	0.176072	14	15	0.186083		205	260	85	-1.14065	0.254018	-1.14065	0.254018	15	15	0.267097		229	236	109	-0.145173	0.884574	-0.145173	0.884574	15	15	0.902462		220	245	100	-0.518476	0.604127	-0.518476	0.604127	15	15	0.623594		206	259	86
3132.4	3192.44	0.388368	181	254	76	-1.26566	0.205634	-1.26566	0.205634	14	15	0.217176		201	264	81	-1.30656	0.191363	-1.30656	0.191363	15	15	0.201679		224	241	104	-0.352564	0.724416	-0.352564	0.724416	15	15	0.743702		220	245	100	-0.518476	0.604127	-0.518476	0.604127	15	15	0.623594		206	259	86
3134.33	3190.48	0.388607	186	249	81	-1.04745	0.294895	-1.04745	0.294895	14	15	0.310143		204	261	84	-1.18212	0.237157	-1.18212	0.237157	15	15	0.249556		227	238	107	-0.228129	0.819546	-0.228129	0.819546	15	15	0.838135		223	242	103	-0.394042	0.693551	-0.394042	0.693551	15	15	0.712965		216	249	96
3136.25	3188.52	0.388846	185	250	80	-1.09109	0.275234	-1.09109	0.275234	14	15	0.289776		212	253	92	-0.8503	0.395159	-0.8503	0.395159	15	15	0.412376		221	244	101	-0.476998	0.633364	-0.476998	0.633364	15	15	0.65287		223	242	103	-0.394042	0.693551	-0.394042	0.693551	15	15	0.712965		218	247	98
3138.18	3186.56	0.389085	193	242	88	-0.741941	0.458124	-0.741941	0.458124	14	15	0.477307		218	247	98	-0.601432	0.547553	-0.601432	0.547553	15	15	0.566774		227	238	107	-0.228129	0.819546	-0.228129	0.819546	15	15	0.838135		227	238	107	-0.228129	0.819546	-0.228129	0.819546	15	15	0.838135		222	243	102
3140.11	3184.6	0.389324	190	245	85	-0.872872	0.382734	-0.872872	0.382734	14	15	0.400494		221	244	101	-0.476998	0.633364	-0.476998	0.633364	15	15	0.65287		233	232	112	0.020739	0.983454	0.020739	0.983454	15	15	1		231	234	111	-0.0622171	0.95039	-0.0622171	0.95039	15	15	0.967417		218	247	98
3142.04	3182.64	0.389563	186	249	81	-1.04745	0.294895	-1.04745	0.294895	14	15	0.310143		216	249	96	-0.684388	0.493731	-0.684388	0.493731	15	15	0.512486		220	245	100	-0.518476	0.604127	-0.518476	0.604127	15	15	0.623594		223	242	103	-0.394042	0.693551	-0.394042	0.693551	15	15	0.712965		214	251	94
3143.97	3180.69	0.389803	176	259	71	-1.48388	0.137841	-1.48388	0.137841	14	15	0.145619		212	253	92	-0.8503	0.395159	-0.8503	0.395159	15	15	0.412376		216	249	96	-0.684388	0.493731	-0.684388	0.493731	15	15	0.512486		215	250	95	-0.725866	0.467921	-0.725866	0.467921	15	15	0.486365		204	261	84
3145.9	3178.74	0.390042	176	259	71	-1.48388	0.137841	-1.48388	0.137841	14	15	0.145619		204	261	84	-1.18212	0.237157	-1.18212	0.237157	15	15	0.249556		221	244	101	-0.476998	0.633364	-0.476998	0.633364	15	15	0.65287		218	247	98	-0.601432	0.547553	-0.601432	0.547553	15	15	0.566774		208	257	88
3147.83	3176.79	0.390281	181	254	76	-1.26566	0.205634	-1.26566	0.205634	14	15	0.217176		211	254	91	-0.891778	0.372512	-0.891778	0.372512	15	15	0.389233		226	239	106	-0.269607	0.787462	-0.269607	0.787462	15	15	0.806334		225	240	105	-0.311086	0.755736	-0.311086	0.755736	15	15	0.77484		211	254	91
3149.76	3174.85	0.39052	190	245	85	-0.872872	0.382734	-0.872872	0.382734	14	15	0.400494		223	242	103	-0.394042	0.693551	-0.394042	0.693551	15	15	0.712965		225	240	105	-0.311086	0.755736	-0.311086	0.755736	15	15	0.77484		223	242	103	-0.394042	0.693551	-0.394042	0.693551	15	15	0.712965		211	254	91
3151.69	3172.91	0.390759	183	252	78	-1.17838	0.238647	-1.17838	0.238647	14	15	0.251712		215	250	95	-0.725866	0.467921	-0.725866	0.467921	15	15	0.486365		227	238	107	-0.228129	0.819546	-0.228129	0.819546	15	15	0.838135		226	239	106	-0.269607	0.787462	-0.269607	0.787462	15	15	0.806334		216	249	96
3153.61	3170.96	0.390998	184	251	79	-1.13473	0.256488	-1.13473	0.256488	14	15	0.270299		216	249	96	-0.684388	0.493731	-0.684388	0.493731	15	15	0.512486		232	233	112	-0.020739	0.983454	-0.020739	0.983454	15	15	1		233	232	112	0.020739	0.983454	0.020739	0.983454	15	15	1		220	245	100
3155.54	3169.03	0.391237	194	241	89	-0.698297	0.484992	-0.698297	0.484992	14	15	0.504539		218	247	98	-0.601432	0.547553	-0.601432	0.547553	15	15	0.566774		228	237	108	-0.186651	0.851934	-0.186651	0.851934	15	15	0.870194		228	237	108	-0.186651	0.851934	-0.186651	0.851934	15	15	0.870194		210	255	90
3157.47	3167.09	0.391477	185	250	80	-1.09109	0.275234	-1.09109	0.275234	14	15	0.289776		221	244	101	-0.476998	0.633364	-0.476998	0.633364	15	15	0.65287		221	244	101	-0.476998	0.633364	-0.476998	0.633364	15	15	0.65287		222	243	102	-0.43552	0.663186	-0.43552	0.663186	15	15	0.682674		199	266	79
3159.4	3165.16	0.391716	184	251	79	-1.13473	0.256488	-1.13473	0.256488	14	15	0.270299		219	246	99	-0.559954	0.575511	-0.559954	0.575511	15	15	0.594884		221	244	101	-0.476998	0.633364	-0.476998	0.633364	15	15	0.65287		224	241	104	-0.352564	0.724416	-0.352564	0.724416	15	15	0.743702		209	256	89
3161.33	3163.23	0.391955	184	251	79	-1.13473	0.256488	-1.13473	0.256488	14	15	0.270299		208	257	88	-1.01621	0.309529	-1.01621	0.309529	15	15	0.324548		218	247	98	-0.601432	0.547553	-0.601432	0.547553	15	15	0.566774		230	235	110	-0.103695	0.917411	-0.103695	0.917411	15	15	0.934887		217	248	97
3163.26	3161.3	0.392194	189	246	84	-0.916515	0.359397	-0.916515	0.359397	14	15	0.376588		205	260	85	-1.14065	0.254018	-1.14065	0.254018	15	15	0.267097		223	242	103	-0.394042	0.693551	-0.394042	0.693551	15	15	0.712965		230	235	110	-0.103695	0.917411	-0.103695	0.917411	15	15	0.934887		213	252	93
3165.19	3159.37	0.392433	180	255	75	-1.30931	0.190431	-1.30931	0.190431	14	15	0.201205		221	244	101	-0.476998	0.633364	-0.476998	0.633364	15	15	0.65287		228	237	108	-0.186651	0.851934	-0.186651	0.851934	15	15	0.870194		235	230	110	0.103695	0.917411	0.103695	0.917411	15	15	0.934887		214	251	94
3167.12	3157.45	0.392672	180	255	75	-1.30931	0.190431	-1.30931	0.190431	14	15	0.201205		215	250	95	-0.725866	0.467921	-0.725866	0.467921	15	15	0.486365		228	237	108	-0.186651	0.851934	-0.186651	0.851934	15	15	0.870194		223	242	103	-0.394042	0.693551	-0.394042	0.693551	15	15	0.712965		211	254	91
3169.04	3155.53	0.392911	192	243	87	-0.785584	0.432112	-0.785584	0.432112	14	15	0.450872		211	254	91	-0.891778	0.372512	-0.891778	0.372512	15	15	0.389233		232	233	112	-0.020739	0.983454	-0.020739	0.983454	15	15	1		225	240	105	-0.311086	0.755736	-0.311086	0.755736	15	15	0.77484		213	252	93
3170.97	3153.61	0.393151	188	247	83	-0.960159	0.336976	-0.960159	0.336976	14	15	0.353554		207	258	87	-1.05769	0.290197	-1.05769	0.290197	15	15	0.304591		226	239	106	-0.269607	0.787462	-0.269607	0.787462	15	15	0.806334		227	238	107	-0.228129	0.819546	-0.228129	0.819546	15	15	0.838135		209	256	89
3172.9	3151.69	0.39339	180	255	75	-1.30931	0.190431	-1.30931	0.190431	14	15	0.201205		212	253	92	-0.8503	0.395159	-0.8503	0.395159	15	15	0.412376		226	239	106	-0.269607	0.787462	-0.269607	0.787462	15	15	0.806334		225	240	105	-0.311086	0.755736	-0.311086	0.755736	15	15	0.77484		206	259	86
3174.83	3149.77	0.393629	183	252	78	-1.17838	0.238647	-1.17838	0.238647	14	15	0.251712		218	247	98	-0.601432	0.547553	-0.601432	0.547553	15	15	0.566774		227	238	107	-0.228129	0.819546	-0.228129	0.819546	15	15	0.838135		232	233	112	-0.020739	0.983454	-0.020739	0.983454	15	15	1		212	253	92
3176.76	3147.86	0.393868	188	247	83	-0.960159	0.336976	-0.960159	0.336976	14	15	0.353554		215	250	95	-0.725866	0.467921	-0.725866	0.467921	15	15	0.486365		224	241	104	-0.352564	0.724416	-0.352564	0.724416	15	15	0.743702		232	233	112	-0.020739	0.983454	-0.020739	0.983454	15	15	1		210	255	90
3178.69	3145.95	0.394107	192	243	87	-0.785584	0.432112	-0.785584	0.432112	14	15	0.450872		211	254	91	-0.891778	0.372512	-0.891778	0.372512	15	15	0.389233		220	245	100	-0.518476	0.604127	-0.518476	0.604127	15	15	0.623594		230	235	110	-0.103695	0.917411	-0.103695	0.917411	15	15	0.934887		215	250	95
3180.62	3144.04	0.394346	183	252	78	-1.17838	0.238647	-1.17838	0.238647	14	15	0.251712		212	253	92	-0.8503	0.395159	-0.8503	0.395159	15	15	0.412376		216	249	96	-0.684388	0.493731	-0.684388	0.493731	15	15	0.512486		229	236	109	-0.145173	0.884574	-0.145173	0.884574	15	15	0.902462		211	254	91
3182.55	3142.14	0.394585	182	253	77	-1.22202	0.221701	-1.22202	0.221701	14	15	0.234007		224	241	104	-0.352564	0.724416	-0.352564	0.724416	15	15	0.743702		222	243	102	-0.43552	0.663186	-0.43552	0.663186	15	15	0.682674		231	234	111	-0.0622171	0.95039	-0.0622171	0.95039	15	15	0.967417		221	244	101
3184.48	3140.23	0.394825	178	257	73	-1.39659	0.162537	-1.39659	0.162537	14	15	0.171789		219	246	99	-0.559954	0.575511	-0.559954	0.575511	15	15	0.594884		220	245	100	-0.518476	0.604127	-0.518476	0.604127	15	15	0.623594		230	235	110	-0.103695	0.917411	-0.103695	0.917411	15	15	0.934887		222	243	102
3186.4	3138.33	0.395064	184	251	79	-1.13473	0.256488	-1.13473	0.256488	14	15	0.270299		212	253	92	-0.8503	0.395159	-0.8503	0.395159	15	15	0.412376		221	244	101	-0.476998	0.633364	-0.476998	0.633364	15	15	0.65287		227	238	107	-0.228129	0.819546	-0.228129	0.819546	15	15	0.838135		225	240	105
3188.33	3136.44	0.395303	185	250	80	-1.09109	0.275234	-1.09109	0.275234	14	15	0.289776		217	248	97	-0.64291	0.520283	-0.64291	0.520283	15	15	0.539299		224	241	104	-0.352564	0.724416	-0.352564	0.724416	15	15	0.743702		224	241	104	-0.352564	0.724416	-0.352564	0.724416	15	15	0.743702		221	244	101
3190.26	3134.54	0.395542	181	254	76	-1.26566	0.205634	-1.26566	0.205634	14	15	0.217176		213	252	93	-0.808822	0.418618	-0.808822	0.418618	15	15	0.436289		219	246	99	-0.559954	0.575511	-0.559954	0.575511	15	15	0.594884		225	240	105	-0.311086	0.755736	-0.311086	0.755736	15	15	0.77484		215	250	95
3192.19	3132.65	0.395781	176	259	71	-1.48388	0.137841	-1.48388	0.137841	14	15	0.145619		204	261	84	-1.18212	0.237157	-1.18212	0.237157	15	15	0.249556		210	255	90	-0.933257	0.350688	-0.933257	0.350688	15	15	0.366875		224	241	104	-0.352564	0.724416	-0.352564	0.724416	15	15	0.743702		206	259	86
3194.12	3130.75	0.39602	177	258	72	-1.44024	0.149801	-1.44024	0.149801	14	15	0.158309		198	267	78	-1.43099	0.152433	-1.43099	0.152433	15	15	0.160685		209	256	89	-0.974735	0.329693	-0.974735	0.329693	15	15	0.345311		220	245	100	-0.518476	0.604127	-0.518476	0.604127	15	15	0.623594		205	260	85
3196.05	3128.86	0.396259	179	256	74	-1.35295	0.176072	-1.35295	0.176072	14	15	0.186083		212	253	92	-0.8503	0.395159	-0.8503	0.395159	15	15	0.412376		213	252	93	-0.808822	0.418618	-0.808822	0.418618	15	15	0.436289		223	242	103	-0.394042	0.693551	-0.394042	0.693551	15	15	0.712965		210	255	90
3197.98	3126.98	0.396499	190	245	85	-0.872872	0.382734	-0.872872	0.382734	14	15	0.400494		222	243	102	-0.43552	0.663186	-0.43552	0.663186	15	15	0.682674		225	240	105	-0.311086	0.755736	-0.311086	0.755736	15	15	0.77484		232	233	112	-0.020739	0.983454	-0.020739	0.983454	15	15	1		217	248	97
3199.91	3125.09	0.396738	194	241	89	-0.698297	0.484992	-0.698297	0.484992	14	15	0.504539		217	248	97	-0.64291	0.520283	-0.64291	0.520283	15	15	0.539299		232	233	112	-0.020739	0.983454	-0.020739	0.983454	15	15	1		235	230	110	0.103695	0.917411	0.103695	0.917411	15	15	0.934887		221	244	101
3201.83	3123.21	0.396977	186	249	81	-1.04745	0.294895	-1.04745	0.294895	14	15	0.310143		215	250	95	-0.725866	0.467921	-0.725866	0.467921	15	15	0.486365		226	239	106	-0.269607	0.787462	-0.269607	0.787462	15	15	0.806334		237	228	108	0.186651	0.851934	0.186651	0.851934	15	15	0.870194		224	241	104
3203.76	3121.33	0.397216	173	262	68	-1.61481	0.106352	-1.61481	0.106352	14	15	0.11207		220	245	100	-0.518476	0.604127	-0.518476	0.604127	15	15	0.623594		223	242	103	-0.394042	0.693551	-0.394042	0.693551	15	15	0.712965		228	237	108	-0.186651	0.851934	-0.186651	0.851934	15	15	0.870194		224	241	104
3205.69	3119.45	0.397455	176	259	71	-1.48388	0.137841	-1.48388	0.137841	14	15	0.145619		214	251	94	-0.767344	0.442877	-0.767344	0.442877	15	15	0.460959		221	244	101	-0.476998	0.633364	-0.476998	0.633364	15	15	0.65287		228	237	108	-0.186651	0.851934	-0.186651	0.851934	15	15	0.870194		217	248	97
3207.62	3117.58	0.397694	167	268	62	-1.87667	0.0605637	-1.87667	0.0605637	14	15	0.0629534		211	254	91	-0.891778	0.372512	-0.891778	0.372512	15	15	0.389233		218	247	98	-0.601432	0.547553	-0.601432	0.547553	15	15	0.566774		226	239	106	-0.269607	0.787462	-0.269607	0.787462	15	15	0.806334		210	255	90
3209.55	3115.7	0.397933	169	266	64	-1.78939	0.0735535	-1.78939	0.0735535	14	15	0.076919		210	255	90	-0.933257	0.350688	-0.933257	0.350688	15	15	0.366875		208	257	88	-1.01621	0.309529	-1.01621	0.309529	15	15	0.324548		219	246	99	-0.559954	0.575511	-0.559954	0.575511	15	15	0.594884		208	257	88
3211.48	3113.83	0.398173	182	253	77	-1.22202	0.221701	-1.22202	0.221701	14	15	0.234007		207	258	87	-1.05769	0.290197	-1.05769	0.290197	15	15	0.304591		221	244	101	-0.476998	0.633364	-0.476998	0.633364	15	15	0.65287		220	245	100	-0.518476	0.604127	-0.518476	0.604127	15	15	0.623594		215	250	95
3213.41	3111.96	0.398412	185	250	80	-1.09109	0.275234	-1.09109	0.275234	14	15	0.289776		216	249	96	-0.684388	0.493731	-0.684388	0.493731	15	15	0.512486		226	239	106	-0.269607	0.787462	-0.269607	0.787462	15	15	0.806334		237	228	108	0.186651	0.851934	0.186651	0.851934	15	15	0.870194		225	240	105
3215.34	3110.09	0.398651	188	247	83	-0.960159	0.336976	-0.960159	0.336976	14	15	0.353554		219	246	99	-0.559954	0.575511	-0.559954	0.575511	15	15	0.594884		226	239	106	-0.269607	0.787462	-0.269607	0.787462	15	15	0.806334		234	231	111	0.0622171	0.95039	0.0622171	0.95039	15	15	0.967417		219	246	99
3217.27	3108.23	0.39889	191	244	86	-0.829228	0.406976	-0.829228	0.406976	14	15	0.425262		222	243	102	-0.43552	0.663186	-0.43552	0.663186	15	15	0.682674		224	241	104	-0.352564	0.724416	-0.352564	0.724416	15	15	0.743702		237	228	108	0.186651	0.851934	0.186651	0.851934	15	15	0.870194		219	246	99
3219.19	3106.37	0.399129	198	237	93	-0.523723	0.600472	-0.523723	0.600472	14	15	0.620867		234	231	111	0.0622171	0.95039	0.0622171	0.95039	15	15	0.967417		235	230	110	0.103695	0.917411	0.103695	0.917411	15	15	0.934887		244	221	101	0.476998	0.633364	0.476998	0.633364	15	15	0.65287		226	239	106
3221.12	3104.51	0.399368	194	241	89	-0.698297	0.484992	-0.698297	0.484992	14	15	0.504539		232	233	112	-0.020739	0.983454	-0.020739	0.983454	15	15	1		232	233	112	-0.020739	0.983454	-0.020739	0.983454	15	15	1		234	231	111	0.0622171	0.95039	0.0622171	0.95039	15	15	0.967417		228	237	108
3223.05	3102.65	0.399607	179	256	74	-1.35295	0.176072	-1.35295	0.176072	14	15	0.186083		212	253	92	-0.8503	0.395159	-0.8503	0.395159	15	15	0.412376		222	243	102	-0.43552	0.663186	-0.43552	0.663186	15	15	0.682674		224	241	104	-0.352564	0.724416	-0.352564	0.724416	15	15	0.743702		211	254	91
3224.98	3100.79	0.399847	170	265	65	-1.74574	0.0808565	-1.74574	0.0808565	14	15	0.0847612		197	268	77	-1.47247	0.140895	-1.47247	0.140895	15	15	0.14848		208	257	88	-1.01621	0.309529	-1.01621	0.309529	15	15	0.324548		223	242	103	-0.394042	0.693551	-0.394042	0.693551	15	15	0.712965		201	264	81
3226.91	3098.94	0.400086	171	264	66	-1.7021	0.0887377	-1.7021	0.0887377	14	15	0.0932157		199	266	79	-1.38952	0.164677	-1.38952	0.164677	15	15	0.173609		213	252	93	-0.808822	0.418618	-0.808822	0.418618	15	15	0.436289		229	236	109	-0.145173	0.884574	-0.145173	0.884574	15	15	0.902462		209	256	89
3228.84	3097.09	0.400325	182	253	77	-1.22202	0.221701	-1.22202	0.221701	14	15	0.234007		214	251	94	-0.767344	0.442877	-0.767344	0.442877	15	15	0.460959		215	250	95	-0.725866	0.467921	-0.725866	0.467921	15	15	0.486365		227	238	107	-0.228129	0.819546	-0.228129	0.819546	15	15	0.838135		214	251	94
3230.77	3095.24	0.400564	190	245	85	-0.872872	0.382734	-0.872872	0.382734	14	15	0.400494		224	241	104	-0.352564	0.724416	-0.352564	0.724416	15	15	0.743702		217	248	97	-0.64291	0.520283	-0.64291	0.520283	15	15	0.539299		231	234	111	-0.0622171	0.95039	-0.0622171	0.95039	15	15	0.967417		223	242	103
3232.7	3093.39	0.400803	189	246	84	-0.916515	0.359397	-0.916515	0.359397	14	15	0.376588		233	232	112	0.020739	0.983454	0.020739	0.983454	15	15	1		222	243	102	-0.43552	0.663186	-0.43552	0.663186	15	15	0.682674		235	230	110	0.103695	0.917411	0.103695	0.917411	15	15	0.934887		227	238	107
3234.62	3091.55	0.401042	183	252	78	-1.17838	0.238647	-1.17838	0.238647	14	15	0.251712		221	244	101	-0.476998	0.633364	-0.476998	0.633364	15	15	0.65287		225	240	105	-0.311086	0.755736	-0.311086	0.755736	15	15	0.77484		237	228	108	0.186651	0.851934	0.186651	0.851934	15	15	0.870194		225	240	105
3236.55	3089.71	0.401281	181	254	76	-1.26566	0.205634	-1.26566	0.205634	14	15	0.217176		208	257	88	-1.01621	0.309529	-1.01621	0.309529	15	15	0.324548		223	242	103	-0.394042	0.693551	-0.394042	0.693551	15	15	0.712965		236	229	109	0.145173	0.884574	0.145173	0.884574	15	15	0.902462		217	248	97
3238.48	3087.87	0.401521	181	254	76	-1.26566	0.205634	-1.26566	0.205634	14	15	0.217176		203	262	83	-1.2236	0.221103	-1.2236	0.221103	15	15	0.232812		221	244	101	-0.476998	0.633364	-0.476998	0.633364	15	15	0.65287		232	233	112	-0.020739	0.983454	-0.020739	0.983454	15	15	1		214	251	94
3240.41	3086.03	0.40176	178	257	73	-1.39659	0.162537	-1.39659	0.162537	14	15	0.171789		210	255	90	-0.933257	0.350688	-0.933257	0.350688	15	15	0.366875		218	247	98	-0.601432	0.547553	-0.601432	0.547553	15	15	0.566774		228	237	108	-0.186651	0.851934	-0.186651	0.851934	15	15	0.870194		218	247	98
3242.34	3084.19	0.401999	175	260	70	-1.52753	0.126631	-1.52753	0.126631	14	15	0.1337		205	260	85	-1.14065	0.254018	-1.14065	0.254018	15	15	0.267097		209	256	89	-0.974735	0.329693	-0.974735	0.329693	15	15	0.345311		218	247	98	-0.601432	0.547553	-0.601432	0.547553	15	15	0.566774		214	251	94
3244.27	3082.36	0.402238	183	252	78	-1.17838	0.238647	-1.17838	0.238647	14	15	0.251712		210	255	90	-0.933257	0.350688	-0.933257	0.350688	15	15	0.366875		209	256	89	-0.974735	0.329693	-0.974735	0.329693	15	15	0.345311		218	247	98	-0.601432	0.547553	-0.601432	0.547553	15	15	0.566774		219	246	99
3246.2	3080.53	0.402477	180	255	75	-1.30931	0.190431	-1.30931	0.190431	14	15	0.201205		221	244	101	-0.476998	0.633364	-0.476998	0.633364	15	15	0.65287		214	251	94	-0.767344	0.442877	-0.767344	0.442877	15	15	0.460959		223	242	103	-0.394042	0.693551	-0.394042	0.693551	15	15	0.712965		223	242	103
3248.13	3078.7	0.402716	175	260	70	-1.52753	0.126631	-1.52753	0.126631	14	15	0.1337		209	256	89	-0.974735	0.329693	-0.974735	0.329693	15	15	0.345311		223	242	103	-0.394042	0.693551	-0.394042	0.693551	15	15	0.712965		223	242	103	-0.394042	0.693551	-0.394042	0.693551	15	15	0.712965		216	249	96
3250.05	3076.87	0.402955	179	256	74	-1.35295	0.176072	-1.35295	0.176072	14	15	0.186083		211	254	91	-0.891778	0.372512	-0.891778	0.372512	15	15	0.389233		221	244	101	-0.476998	0.633364	-0.476998	0.633364	15	15	0.65287		224	241	104	-0.352564	0.724416	-0.352564	0.724416	15	15	0.743702		216	249	96
3251.98	3075.05	0.403195	184	251	79	-1.13473	0.256488	-1.13473	0.256488	14	15	0.270299		224	241	104	-0.352564	0.724416	-0.352564	0.724416	15	15	0.743702		214	251	94	-0.767344	0.442877	-0.767344	0.442877	15	15	0.460959		228	237	108	-0.186651	0.851934	-0.186651	0.851934	15	15	0.870194		217	248	97
3253.91	3073.22	0.403434	187	248	82	-1.0038	0.315475	-1.0038	0.315475	14	15	0.331405		224	241	104	-0.352564	0.724416	-0.352564	0.724416	15	15	0.743702		212	253	92	-0.8503	0.395159	-0.8503	0.395159	15	15	0.412376		226	239	106	-0.269607	0.787462	-0.269607	0.787462	15	15	0.806334		214	251	94
3255.84	3071.4	0.403673	179	256	74	-1.35295	0.176072	-1.35295	0.176072	14	15	0.186083		206	259	86	-1.09917	0.271695	-1.09917	0.271695	15	15	0.285441		206	259	86	-1.09917	0.271695	-1.09917	0.271695	15	15	0.285441		232	233	112	-0.020739	0.983454	-0.020739	0.983454	15	15	1		214	251	94
3257.77	3069.58	0.403912	181	254	76	-1.26566	0.205634	-1.26566	0.205634	14	15	0.217176		216	249	96	-0.684388	0.493731	-0.684388	0.493731	15	15	0.512486		214	251	94	-0.767344	0.442877	-0.767344	0.442877	15	15	0.460959		234	231	111	0.0622171	0.95039	0.0622171	0.95039	15	15	0.967417		220	245	100
3259.7	3067.77	0.404151	183	252	78	-1.17838	0.238647	-1.17838	0.238647	14	15	0.251712		216	249	96	-0.684388	0.493731	-0.684388	0.493731	15	15	0.512486		215	250	95	-0.725866	0.467921	-0.725866	0.467921	15	15	0.486365		224	241	104	-0.352564	0.724416	-0.352564	0.724416	15	15	0.743702		222	243	102
3261.63	3065.95	0.40439	174	261	69	-1.57117	0.116144	-1.57117	0.116144	14	15	0.122524		210	255	90	-0.933257	0.350688	-0.933257	0.350688	15	15	0.366875		205	260	85	-1.14065	0.254018	-1.14065	0.254018	15	15	0.267097		229	236	109	-0.145173	0.884574	-0.145173	0.884574	15	15	0.902462		219	246	99
3263.56	3064.14	0.404629	178	257	73	-1.39659	0.162537	-1.39659	0.162537	14	15	0.171789		212	253	92	-0.8503	0.395159	-0.8503	0.395159	15	15	0.412376		210	255	90	-0.933257	0.350688	-0.933257	0.350688	15	15	0.366875		231	234	111	-0.0622171	0.95039	-0.0622171	0.95039	15	15	0.967417		221	244	101
3265.49	3062.33	0.404869	184	251	79	-1.13473	0.256488	-1.13473	0.256488	14	15	0.270299		214	251	94	-0.767344	0.442877	-0.767344	0.442877	15	15	0.460959		213	252	93	-0.808822	0.418618	-0.808822	0.418618	15	15	0.436289		227	238	107	-0.228129	0.819546	-0.228129	0.819546	15	15	0.838135		217	248	97
3267.41	3060.52	0.405108	182	253	77	-1.22202	0.221701	-1.22202	0.221701	14	15	0.234007		204	261	84	-1.18212	0.237157	-1.18212	0.237157	15	15	0.249556		212	253	92	-0.8503	0.395159	-0.8503	0.395159	15	15	0.412376		224	241	104	-0.352564	0.724416	-0.352564	0.724416	15	15	0.743702		211	254	91
3269.34	3058.72	0.405347	179	256	74	-1.35295	0.176072	-1.35295	0.176072	14	15	0.186083		202	263	82	-1.26508	0.205843	-1.26508	0.205843	15	15	0.216857		206	259	86	-1.09917	0.271695	-1.09917	0.271695	15	15	0.285441		217	248	97	-0.64291	0.520283	-0.64291	0.520283	15	15	0.539299		218	247	98
3271.27	3056.91	0.405586	189	246	84	-0.916515	0.359397	-0.916515	0.359397	14	15	0.376588		218	247	98	-0.601432	0.547553	-0.601432	0.547553	15	15	0.566774		213	252	93	-0.808822	0.418618	-0.808822	0.418618	15	15	0.436289		221	244	101	-0.476998	0.633364	-0.476998	0.633364	15	15	0.65287		223	242	103
3273.2	3055.11	0.405825	185	250	80	-1.09109	0.275234	-1.09109	0.275234	14	15	0.289776		214	251	94	-0.767344	0.442877	-0.767344	0.442877	15	15	0.460959		212	253	92	-0.8503	0.395159	-0.8503	0.395159	15	15	0.412376		220	245	100	-0.518476	0.604127	-0.518476	0.604127	15	15	0.623594		226	239	106
3275.13	3053.31	0.406064	183	252	78	-1.17838	0.238647	-1.17838	0.238647	14	15	0.251712		206	259	86	-1.09917	0.271695	-1.09917	0.271695	15	15	0.285441		204	261	84	-1.18212	0.237157	-1.18212	0.237157	15	15	0.249556		232	233	112	-0.020739	0.983454	-0.020739	0.983454	15	15	1		221	244	101
3277.06	3051.52	0.406303	178	257	73	-1.39659	0.162537	-1.39659	0.162537	14	15	0.171789		210	255	90	-0.933257	0.350688	-0.933257	0.350688	15	15	0.366875		211	254	91	-0.891778	0.372512	-0.891778	0.372512	15	15	0.389233		232	233	112	-0.020739	0.983454	-0.020739	0.983454	15	15	1		220	245	100
3278.99	3049.72	0.406543	181	254	76	-1.26566	0.205634	-1.26566	0.205634	14	15	0.217176		207	258	87	-1.05769	0.290197	-1.05769	0.290197	15	15	0.304591		215	250	95	-0.725866	0.467921	-0.725866	0.467921	15	15	0.486365		232	233	112	-0.020739	0.983454	-0.020739	0.983454	15	15	1		224	241	104
3280.92	3047.93	0.406782	179	256	74	-1.35295	0.176072	-1.35295	0.176072	14	15	0.186083		201	264	81	-1.30656	0.191363	-1.30656	0.191363	15	15	0.201679		211	254	91	-0.891778	0.372512	-0.891778	0.372512	15	15	0.389233		224	241	104	-0.352564	0.724416	-0.352564	0.724416	15	15	0.743702		222	243	102
3282.84	3046.14	0.407021	179	256	74	-1.35295	0.176072	-1.35295	0.176072	14	15	0.186083		202	263	82	-1.26508	0.205843	-1.26508	0.205843	15	15	0.216857		207	258	87	-1.05769	0.290197	-1.05769	0.290197	15	15	0.304591		226	239	106	-0.269607	0.787462	-0.269607	0.787462	15	15	0.806334		228	237	108
3284.77	3044.35	0.40726	169	266	64	-1.78939	0.0735535	-1.78939	0.0735535	14	15	0.076919		213	252	93	-0.808822	0.418618	-0.808822	0.418618	15	15	0.436289		213	252	93	-0.808822	0.418618	-0.808822	0.418618	15	15	0.436289		224	241	104	-0.352564	0.724416	-0.352564	0.724416	15	15	0.743702		229	236	109
3286.7	3042.56	0.407499	170	265	65	-1.74574	0.0808565	-1.74574	0.0808565	14	15	0.0847612		212	253	92	-0.8503	0.395159	-0.8503	0.395159	15	15	0.412376		217	248	97	-0.64291	0.520283	-0.64291	0.520283	15	15	0.539299		221	244	101	-0.476998	0.633364	-0.476998	0.633364	15	15	0.65287		226	239	106
3288.63	3040.78	0.407738	186	249	81	-1.04745	0.294895	-1.04745	0.294895	14	15	0.310143		214	251	94	-0.767344	0.442877	-0.767344	0.442877	15	15	0.460959		215	250	95	-0.725866	0.467921	-0.725866	0.467921	15	15	0.486365		230	235	110	-0.103695	0.917411	-0.103695	0.917411	15	15	0.934887		224	241	104
3290.56	3039	0.407977	190	245	85	-0.872872	0.382734	-0.872872	0.382734	14	15	0.400494		211	254	91	-0.891778	0.372512	-0.891778	0.372512	15	15	0.389233		219	246	99	-0.559954	0.575511	-0.559954	0.575511	15	15	0.594884		228	237	108	-0.186651	0.851934	-0.186651	0.851934	15	15	0.870194		219	246	99
3292.49	3037.22	0.408217	196	239	91	-0.61101	0.541193	-0.61101	0.541193	14	15	0.561291		217	248	97	-0.64291	0.520283	-0.64291	0.520283	15	15	0.539299		218	247	98	-0.601432	0.547553	-0.601432	0.547553	15	15	0.566774		226	239	106	-0.269607	0.787462	-0.269607	0.787462	15	15	0.806334		222	243	102
3294.42	3035.44	0.408456	197	238	92	-0.567367	0.570466	-0.567367	0.570466	14	15	0.590745		218	247	98	-0.601432	0.547553	-0.601432	0.547553	15	15	0.566774		215	250	95	-0.725866	0.467921	-0.725866	0.467921	15	15	0.486365		227	238	107	-0.228129	0.819546	-0.228129	0.819546	15	15	0.838135		226	239	106
3296.35	3033.66	0.408695	189	246	84	-0.916515	0.359397	-0.916515	0.359397	14	15	0.376588		218	247	98	-0.601432	0.547553	-0.601432	0.547553	15	15	0.566774		216	249	96	-0.684388	0.493731	-0.684388	0.493731	15	15	0.512486		231	234	111	-0.0622171	0.95039	-0.0622171	0.95039	15	15	0.967417		228	237	108
3298.28	3031.89	0.408934	184	251	79	-1.13473	0.256488	-1.13473	0.256488	14	15	0.270299		218	247	98	-0.601432	0.547553	-0.601432	0.547553	15	15	0.566774		207	258	87	-1.05769	0.290197	-1.05769	0.290197	15	15	0.304591		232	233	112	-0.020739	0.983454	-0.020739	0.983454	15	15	1		228	237	108
3300.2	3030.12	0.409173	176	259	71	-1.48388	0.137841	-1.48388	0.137841	14	15	0.145619		218	247	98	-0.601432	0.547553	-0.601432	0.547553	15	15	0.566774		199	266	79	-1.38952	0.164677	-1.38952	0.164677	15	15	0.173609		227	238	107	-0.228129	0.819546	-0.228129	0.819546	15	15	0.838135		219	246	99
3302.13	3028.35	0.409412	177	258	72	-1.44024	0.149801	-1.44024	0.149801	14	15	0.158309		217	248	97	-0.64291	0.520283	-0.64291	0.520283	15	15	0.539299		197	268	77	-1.47247	0.140895	-1.47247	0.140895	15	15	0.14848		226	239	106	-0.269607	0.787462	-0.269607	0.787462	15	15	0.806334		221	244	101
3304.06	3026.58	0.409651	180	255	75	-1.30931	0.190431	-1.30931	0.190431	14	15	0.201205		220	245	100	-0.518476	0.604127	-0.518476	0.604127	15	15	0.623594		212	253	92	-0.8503	0.395159	-0.8503	0.395159	15	15	0.412376		228	237	108	-0.186651	0.851934	-0.186651	0.851934	15	15	0.870194		229	236	109
3305.99	3024.81	0.409891	185	250	80	-1.09109	0.275234	-1.09109	0.275234	14	15	0.289776		216	249	96	-0.684388	0.493731	-0.684388	0.493731	15	15	0.512486		219	246	99	-0.559954	0.575511	-0.559954	0.575511	15	15	0.594884		230	235	110	-0.103695	0.917411	-0.103695	0.917411	15	15	0.934887		225	240	105
3307.92	3023.05	0.41013	188	247	83	-0.960159	0.336976	-0.960159	0.336976	14	15	0.353554		213	252	93	-0.808822	0.418618	-0.808822	0.418618	15	15	0.436289		221	244	101	-0.476998	0.633364	-0.476998	0.633364	15	15	0.65287		228	237	108	-0.186651	0.851934	-0.186651	0.851934	15	15	0.870194		224	241	104
3309.85	3021.29	0.410369	182	253	77	-1.22202	0.221701	-1.22202	0.221701	14	15	0.234007		220	245	100	-0.518476	0.604127	-0.518476	0.604127	15	15	0.623594		210	255	90	-0.933257	0.350688	-0.933257	0.350688	15	15	0.366875		226	239	106	-0.269607	0.787462	-0.269607	0.787462	15	15	0.806334		219	246	99
3311.78	3019.53	0.410608	187	248	82	-1.0038	0.315475	-1.0038	0.315475	14	15	0.331405		216	249	96	-0.684388	0.493731	-0.684388	0.493731	15	15	0.512486		214	251	94	-0.767344	0.442877	-0.767344	0.442877	15	15	0.460959		230	235	110	-0.103695	0.917411	-0.103695	0.917411	15	15	0.934887		222	243	102
3313.71	3017.77	0.410847	190	245	85	-0.872872	0.382734	-0.872872	0.382734	14	15	0.400494		213	252	93	-0.808822	0.418618	-0.808822	0.418618	15	15	0.436289		213	252	93	-0.808822	0.418618	-0.808822	0.418618	15	15	0.436289		232	233	112	-0.020739	0.983454	-0.020739	0.983454	15	15	1		223	242	103
3315.63	3016.01	0.411086	185	250	80	-1.09109	0.275234	-1.09109	0.275234	14	15	0.289776		210	255	90	-0.933257	0.350688	-0.933257	0.350688	15	15	0.366875		210	255	90	-0.933257	0.350688	-0.933257	0.350688	15	15	0.366875		231	234	111	-0.0622171	0.95039	-0.0622171	0.95039	15	15	0.967417		219	246	99
3317.56	3014.26	0.411325	184	251	79	-1.13473	0.256488	-1.13473	0.256488	14	15	0.270299		208	257	88	-1.01621	0.309529	-1.01621	0.309529	15	15	0.324548		197	268	77	-1.47247	0.140895	-1.47247	0.140895	15	15	0.14848		229	236	109	-0.145173	0.884574	-0.145173	0.884574	15	15	0.902462		217	248	97
3319.49	3012.51	0.411565	191	244	86	-0.829228	0.406976	-0.829228	0.406976	14	15	0.425262		219	246	99	-0.559954	0.575511	-0.559954	0.575511	15	15	0.594884		209	256	89	-0.974735	0.329693	-0.974735	0.329693	15	15	0.345311		233	232	112	0.020739	0.983454	0.020739	0.983454	15	15	1		222	243	102
3321.42	3010.76	0.411804	192	243	87	-0.785584	0.432112	-0.785584	0.432112	14	15	0.450872		225	240	105	-0.311086	0.755736	-0.311086	0.755736	15	15	0.77484		213	252	93	-0.808822	0.418618	-0.808822	0.418618	15	15	0.436289		237	228	108	0.186651	0.851934	0.186651	0.851934	15	15	0.870194		224	241	104
3323.35	3009.01	0.412043	209	226	104	-0.0436436	0.965189	-0.0436436	0.965189	14	15	0.982865		229	236	109	-0.145173	0.884574	-0.145173	0.884574	15	15	0.902462		222	243	102	-0.43552	0.663186	-0.43552	0.663186	15	15	0.682674		238	227	107	0.228129	0.819546	0.228129	0.819546	15	15	0.838135		233	232	112
3325.28	3007.27	0.412282	196	239	91	-0.61101	0.541193	-0.61101	0.541193	14	15	0.561291		229	236	109	-0.145173	0.884574	-0.145173	0.884574	15	15	0.902462		218	247	98	-0.601432	0.547553	-0.601432	0.547553	15	15	0.566774		239	226	106	0.269607	0.787462	0.269607	0.787462	15	15	0.806334		236	229	109
3327.21	3005.52	0.412521	180	255	75	-1.30931	0.190431	-1.30931	0.190431	14	15	0.201205		215	250	95	-0.725866	0.467921	-0.725866	0.467921	15	15	0.486365		212	253	92	-0.8503	0.395159	-0.8503	0.395159	15	15	0.412376		228	237	108	-0.186651	0.851934	-0.186651	0.851934	15	15	0.870194		227	238	107
3329.14	3003.78	0.41276	170	265	65	-1.74574	0.0808565	-1.74574	0.0808565	14	15	0.0847612		214	251	94	-0.767344	0.442877	-0.767344	0.442877	15	15	0.460959		211	254	91	-0.891778	0.372512	-0.891778	0.372512	15	15	0.389233		228	237	108	-0.186651	0.851934	-0.186651	0.851934	15	15	0.870194		222	243	102
3331.07	3002.04	0.412999	183	252	78	-1.17838	0.238647	-1.17838	0.238647	14	15	0.251712		215	250	95	-0.725866	0.467921	-0.725866	0.467921	15	15	0.486365		211	254	91	-0.891778	0.372512	-0.891778	0.372512	15	15	0.389233		230	235	110	-0.103695	0.917411	-0.103695	0.917411	15	15	0.934887		224	241	104
3332.99	3000.31	0.413239	185	250	80	-1.09109	0.275234	-1.09109	0.275234	14	15	0.289776		213	252	93	-0.808822	0.418618	-0.808822	0.418618	15	15	0.436289		204	261	84	-1.18212	0.237157	-1.18212	0.237157	15	15	0.249556		227	238	107	-0.228129	0.819546	-0.228129	0.819546	15	15	0.838135		217	248	97
3334.92	2998.57	0.413478	178	257	73	-1.39659	0.162537	-1.39659	0.162537	14	15	0.171789		213	252	93	-0.808822	0.418618	-0.808822	0.418618	15	15	0.436289		211	254	91	-0.891778	0.372512	-0.891778	0.372512	15	15	0.389233		227	238	107	-0.228129	0.819546	-0.228129	0.819546	15	15	0.838135		213	252	93
3336.85	2996.84	0.413717	188	247	83	-0.960159	0.336976	-0.960159	0.336976	14	15	0.353554		208	257	88	-1.01621	0.309529	-1.01621	0.309529	15	15	0.324548		207	258	87	-1.05769	0.290197	-1.05769	0.290197	15	15	0.304591		233	232	112	0.020739	0.983454	0.020739	0.983454	15	15	1		218	247	98
3338.78	2995.11	0.413956	193	242	88	-0.741941	0.458124	-0.741941	0.458124	14	15	0.477307		209	256	89	-0.974735	0.329693	-0.974735	0.329693	15	15	0.345311		210	255	90	-0.933257	0.350688	-0.933257	0.350688	15	15	0.366875		231	234	111	-0.0622171	0.95039	-0.0622171	0.95039	15	15	0.967417		222	243	102
3340.71	2993.38	0.414195	185	250	80	-1.09109	0.275234	-1.09109	0.275234	14	15	0.289776		209	256	89	-0.974735	0.329693	-0.974735	0.329693	15	15	0.345311		204	261	84	-1.18212	0.237157	-1.18212	0.237157	15	15	0.249556		226	239	106	-0.269607	0.787462	-0.269607	0.787462	15	15	0.806334		219	246	99
3342.64	2991.65	0.414434	183	252	78	-1.17838	0.238647	-1.17838	0.238647	14	15	0.251712		212	253	92	-0.8503	0.395159	-0.8503	0.395159	15	15	0.412376		212	253	92	-0.8503	0.395159	-0.8503	0.395159	15	15	0.412376		231	234	111	-0.0622171	0.95039	-0.0622171	0.95039	15	15	0.967417		222	243	102
3344.57	2989.92	0.414673	197	238	92	-0.567367	0.570466	-0.567367	0.570466	14	15	0.590745		222	243	102	-0.43552	0.663186	-0.43552	0.663186	15	15	0.682674		219	246	99	-0.559954	0.575511	-0.559954	0.575511	15	15	0.594884		235	230	110	0.103695	0.917411	0.103695	0.917411	15	15	0.934887		227	238	107
3346.5	2988.2	0.414913	195	240	90	-0.654654	0.512691	-0.654654	0.512691	14	15	0.532545		228	237	108	-0.186651	0.851934	-0.186651	0.851934	15	15	0.870194		218	247	98	-0.601432	0.547553	-0.601432	0.547553	15	15	0.566774		235	230	110	0.103695	0.917411	0.103695	0.917411	15	15	0.934887		232	233	112
3348.42	2986.48	0.415152	193	242	88	-0.741941	0.458124	-0.741941	0.458124	14	15	0.477307		219	246	99	-0.559954	0.575511	-0.559954	0.575511	15	15	0.594884		201	264	81	-1.30656	0.191363	-1.30656	0.191363	15	15	0.201679		230	235	110	-0.103695	0.917411	-0.103695	0.917411	15	15	0.934887		223	242	103
3350.35	2984.76	0.415391	180	255	75	-1.30931	0.190431	-1.30931	0.190431	14	15	0.201205		207	258	87	-1.05769	0.290197	-1.05769	0.290197	15	15	0.304591		199	266	79	-1.38952	0.164677	-1.38952	0.164677	15	15	0.173609		221	244	101	-0.476998	0.633364	-0.476998	0.633364	15	15	0.65287		213	252	93
3352.28	2983.04	0.41563	174	261	69	-1.57117	0.116144	-1.57117	0.116144	14	15	0.122524		199	266	79	-1.38952	0.164677	-1.38952	0.164677	15	15	0.173609		194	271	74	-1.59691	0.110288	-1.59691	0.110288	15	15	0.115979		221	244	101	-0.476998	0.633364	-0.476998	0.633364	15	15	0.65287		211	254	91
3354.21	2981.33	0.415869	166	269	61	-1.92032	0.0548187	-1.92032	0.0548187	14	15	0.0567726		201	264	81	-1.30656	0.191363	-1.30656	0.191363	15	15	0.201679		200	265	80	-1.34804	0.177647	-1.34804	0.177647	15	15	0.187268		226	239	106	-0.269607	0.787462	-0.269607	0.787462	15	15	0.806334		211	254	91
3356.14	2979.61	0.416108	176	259	71	-1.48388	0.137841	-1.48388	0.137841	14	15	0.145619		210	255	90	-0.933257	0.350688	-0.933257	0.350688	15	15	0.366875		202	263	82	-1.26508	0.205843	-1.26508	0.205843	15	15	0.216857		228	237	108	-0.186651	0.851934	-0.186651	0.851934	15	15	0.870194		210	255	90
3358.07	2977.9	0.416347	179	256	74	-1.35295	0.176072	-1.35295	0.176072	14	15	0.186083		216	249	96	-0.684388	0.493731	-0.684388	0.493731	15	15	0.512486		210	255	90	-0.933257	0.350688	-0.933257	0.350688	15	15	0.366875		231	234	111	-0.0622171	0.95039	-0.0622171	0.95039	15	15	0.967417		216	249	96
3360	2976.19	0.416587	181	254	76	-1.26566	0.205634	-1.26566	0.205634	14	15	0.217176		218	247	98	-0.601432	0.547553	-0.601432	0.547553	15	15	0.566774		217	248	97	-0.64291	0.520283	-0.64291	0.520283	15	15	0.539299		237	228	108	0.186651	0.851934	0.186651	0.851934	15	15	0.870194		223	242	103
3361.93	2974.49	0.416826	195	240	90	-0.654654	0.512691	-0.654654	0.512691	14	15	0.532545		217	248	97	-0.64291	0.520283	-0.64291	0.520283	15	15	0.539299		221	244	101	-0.476998	0.633364	-0.476998	0.633364	15	15	0.65287		240	225	105	0.311086	0.755736	0.311086	0.755736	15	15	0.77484		223	242	103
3363.86	2972.78	0.417065	199	236	94	-0.480079	0.631171	-0.480079	0.631171	14	15	0.651619		228	237	108	-0.186651	0.851934	-0.186651	0.851934	15	15	0.870194		220	245	100	-0.518476	0.604127	-0.518476	0.604127	15	15	0.623594		236	229	109	0.145173	0.884574	0.145173	0.884574	15	15	0.902462		214	251	94
3365.78	2971.08	0.417304	197	238	92	-0.567367	0.570466	-0.567367	0.570466	14	15	0.590745		216	249	96	-0.684388	0.493731	-0.684388	0.493731	15	15	0.512486		210	255	90	-0.933257	0.350688	-0.933257	0.350688	15	15	0.366875		232	233	112	-0.020739	0.983454	-0.020739	0.983454	15	15	1		209	256	89
3367.71	2969.37	0.417543	180	255	75	-1.30931	0.190431	-1.30931	0.190431	14	15	0.201205		220	245	100	-0.518476	0.604127	-0.518476	0.604127	15	15	0.623594		206	259	86	-1.09917	0.271695	-1.09917	0.271695	15	15	0.285441		235	230	110	0.103695	0.917411	0.103695	0.917411	15	15	0.934887		206	259	86
3369.64	2967.67	0.417782	180	255	75	-1.30931	0.190431	-1.30931	0.190431	14	15	0.201205		219	246	99	-0.559954	0.575511	-0.559954	0.575511	15	15	0.594884		208	257	88	-1.01621	0.309529	-1.01621	0.309529	15	15	0.324548		231	234	111	-0.0622171	0.95039	-0.0622171	0.95039	15	15	0.967417		210	255	90
3371.57	2965.98	0.418021	180	255	75	-1.30931	0.190431	-1.30931	0.190431	14	15	0.201205		220	245	100	-0.518476	0.604127	-0.518476	0.604127	15	15	0.623594		211	254	91	-0.891778	0.372512	-0.891778	0.372512	15	15	0.389233		237	228	108	0.186651	0.851934	0.186651	0.851934	15	15	0.870194		209	256	89
3373.5	2964.28	0.418261	188	247	83	-0.960159	0.336976	-0.960159	0.336976	14	15	0.353554		229	236	109	-0.145173	0.884574	-0.145173	0.884574	15	15	0.902462		215	250	95	-0.725866	0.467921	-0.725866	0.467921	15	15	0.486365		235	230	110	0.103695	0.917411	0.103695	0.917411	15	15	0.934887		208	257	88
3375.43	2962.59	0.4185	190	245	85	-0.872872	0.382734	-0.872872	0.382734	14	15	0.400494		220	245	100	-0.518476	0.604127	-0.518476	0.604127	15	15	0.623594		213	252	93	-0.808822	0.418618	-0.808822	0.418618	15	15	0.436289		231	234	111	-0.0622171	0.95039	-0.0622171	0.95039	15	15	0.967417		217	248	97
3377.36	2960.9	0.418739	189	246	84	-0.916515	0.359397	-0.916515	0.359397	14	15	0.376588		219	246	99	-0.559954	0.575511	-0.559954	0.575511	15	15	0.594884		216	249	96	-0.684388	0.493731	-0.684388	0.493731	15	15	0.512486		234	231	111	0.0622171	0.95039	0.0622171	0.95039	15	15	0.967417		215	250	95
3379.29	2959.21	0.418978	182	253	77	-1.22202	0.221701	-1.22202	0.221701	14	15	0.234007		225	240	105	-0.311086	0.755736	-0.311086	0.755736	15	15	0.77484		218	247	98	-0.601432	0.547553	-0.601432	0.547553	15	15	0.566774		233	232	112	0.020739	0.983454	0.020739	0.983454	15	15	1		213	252	93
3381.21	2957.52	0.419217	189	246	84	-0.916515	0.359397	-0.916515	0.359397	14	15	0.376588		224	241	104	-0.352564	0.724416	-0.352564	0.724416	15	15	0.743702		221	244	101	-0.476998	0.633364	-0.476998	0.633364	15	15	0.65287		239	226	106	0.269607	0.787462	0.269607	0.787462	15	15	0.806334		227	238	107
3383.14	2955.83	0.419456	199	236	94	-0.480079	0.631171	-0.480079	0.631171	14	15	0.651619		221	244	101	-0.476998	0.633364	-0.476998	0.633364	15	15	0.65287		218	247	98	-0.601432	0.547553	-0.601432	0.547553	15	15	0.566774		235	230	110	0.103695	0.917411	0.103695	0.917411	15	15	0.934887		232	233	112
3385.07	2954.15	0.419695	197	238	92	-0.567367	0.570466	-0.567367	0.570466	14	15	0.590745		206	259	86	-1.09917	0.271695	-1.09917	0.271695	15	15	0.285441		210	255	90	-0.933257	0.350688	-0.933257	0.350688	15	15	0.366875		230	235	110	-0.103695	0.917411	-0.103695	0.917411	15	15	0.934887		220	245	100
3387	2952.46	0.419935	191	244	86	-0.829228	0.406976	-0.829228	0.406976	14	15	0.425262		208	257	88	-1.01621	0.309529	-1.01621	0.309529	15	15	0.324548		207	258	87	-1.05769	0.290197	-1.05769	0.290197	15	15	0.304591		227	238	107	-0.228129	0.819546	-0.228129	0.819546	15	15	0.838135		218	247	98
3388.93	2950.78	0.420174	184	251	79	-1.13473	0.256488	-1.13473	0.256488	14	15	0.270299		208	257	88	-1.01621	0.309529	-1.01621	0.309529	15	15	0.324548		205	260	85	-1.14065	0.254018	-1.14065	0.254018	15	15	0.267097		235	230	110	0.103695	0.917411	0.103695	0.917411	15	15	0.934887		215	250	95
3390.86	2949.11	0.420413	187	248	82	-1.0038	0.315475	-1.0038	0.315475	14	15	0.331405		211	254	91	-0.891778	0.372512	-0.891778	0.372512	15	15	0.389233		203	262	83	-1.2236	0.221103	-1.2236	0.221103	15	15	0.232812		232	233	112	-0.020739	0.983454	-0.020739	0.983454	15	15	1		205	260	85
3392.79	2947.43	0.420652	183	252	78	-1.17838	0.238647	-1.17838	0.238647	14	15	0.251712		223	242	103	-0.394042	0.693551	-0.394042	0.693551	15	15	0.712965		199	266	79	-1.38952	0.164677	-1.38952	0.164677	15	15	0.173609		226	239	106	-0.269607	0.787462	-0.269607	0.787462	15	15	0.806334		203	262	83
3394.72	2945.75	0.420891	197	238	92	-0.567367	0.570466	-0.567367	0.570466	14	15	0.590745		223	242	103	-0.394042	0.693551	-0.394042	0.693551	15	15	0.712965		209	256	89	-0.974735	0.329693	-0.974735	0.329693	15	15	0.345311		237	228	108	0.186651	0.851934	0.186651	0.851934	15	15	0.870194		218	247	98
3396.64	2944.08	0.42113	191	244	86	-0.829228	0.406976	-0.829228	0.406976	14	15	0.425262		221	244	101	-0.476998	0.633364	-0.476998	0.633364	15	15	0.65287		221	244	101	-0.476998	0.633364	-0.476998	0.633364	15	15	0.65287		240	225	105	0.311086	0.755736	0.311086	0.755736	15	15	0.77484		219	246	99
3398.57	2942.41	0.421369	182	253	77	-1.22202	0.221701	-1.22202	0.221701	14	15	0.234007		215	250	95	-0.725866	0.467921	-0.725866	0.467921	15	15	0.486365		225	240	105	-0.311086	0.755736	-0.311086	0.755736	15	15	0.77484		243	222	102	0.43552	0.663186	0.43552	0.663186	15	15	0.682674		218	247	98
3400.5	2940.74	0.421609	189	246	84	-0.916515	0.359397	-0.916515	0.359397	14	15	0.376588		214	251	94	-0.767344	0.442877	-0.767344	0.442877	15	15	0.460959		222	243	102	-0.43552	0.663186	-0.43552	0.663186	15	15	0.682674		243	222	102	0.43552	0.663186	0.43552	0.663186	15	15	0.682674		218	247	98
3402.43	2939.07	0.421848	186	249	81	-1.04745	0.294895	-1.04745	0.294895	14	15	0.310143		217	248	97	-0.64291	0.520283	-0.64291	0.520283	15	15	0.539299		216	249	96	-0.684388	0.493731	-0.684388	0.493731	15	15	0.512486		235	230	110	0.103695	0.917411	0.103695	0.917411	15	15	0.934887		211	254	91
3404.36	2937.41	0.422087	195	240	90	-0.654654	0.512691	-0.654654	0.512691	14	15	0.532545		222	243	102	-0.43552	0.663186	-0.43552	0.663186	15	15	0.682674		213	252	93	-0.808822	0.418618	-0.808822	0.418618	15	15	0.436289		236	229	109	0.145173	0.884574	0.145173	0.884574	15	15	0.902462		218	247	98
3406.29	2935.75	0.422326	190	245	85	-0.872872	0.382734	-0.872872	0.382734	14	15	0.400494		228	237	108	-0.186651	0.851934	-0.186651	0.851934	15	15	0.870194		213	252	93	-0.808822	0.418618	-0.808822	0.418618	15	15	0.436289		237	228	108	0.186651	0.851934	0.186651	0.851934	15	15	0.870194		216	249	96
3408.22	2934.08	0.422565	181	254	76	-1.26566	0.205634	-1.26566	0.205634	14	15	0.217176		216	249	96	-0.684388	0.493731	-0.684388	0.493731	15	15	0.512486		215	250	95	-0.725866	0.467921	-0.725866	0.467921	15	15	0.486365		236	229	109	0.145173	0.884574	0.145173	0.884574	15	15	0.902462		214	251	94
3410.15	2932.43	0.422804	185	250	80	-1.09109	0.275234	-1.09109	0.275234	14	15	0.289776		206	259	86	-1.09917	0.271695	-1.09917	0.271695	15	15	0.285441		214	251	94	-0.767344	0.442877	-0.767344	0.442877	15	15	0.460959		236	229	109	0.145173	0.884574	0.145173	0.884574	15	15	0.902462		217	248	97
3412.08	2930.77	0.423043	192	243	87	-0.785584	0.432112	-0.785584	0.432112	14	15	0.450872		212	253	92	-0.8503	0.395159	-0.8503	0.395159	15	15	0.412376		217	248	97	-0.64291	0.520283	-0.64291	0.520283	15	15	0.539299		243	222	102	0.43552	0.663186	0.43552	0.663186	15	15	0.682674		222	243	102
3414	2929.11	0.423283	198	237	93	-0.523723	0.600472	-0.523723	0.600472	14	15	0.620867		226	239	106	-0.269607	0.787462	-0.269607	0.787462	15	15	0.806334		219	246	99	-0.559954	0.575511	-0.559954	0.575511	15	15	0.594884		237	228	108	0.186651	0.851934	0.186651	0.851934	15	15	0.870194		220	245	100
3415.93	2927.46	0.423522	188	247	83	-0.960159	0.336976	-0.960159	0.336976	14	15	0.353554		219	246	99	-0.559954	0.575511	-0.559954	0.575511	15	15	0.594884		214	251	94	-0.767344	0.442877	-0.767344	0.442877	15	15	0.460959		235	230	110	0.103695	0.917411	0.103695	0.917411	15	15	0.934887		212	253	92
3417.86	2925.81	0.423761	189	246	84	-0.916515	0.359397	-0.916515	0.359397	14	15	0.376588		216	249	96	-0.684388	0.493731	-0.684388	0.493731	15	15	0.512486		209	256	89	-0.974735	0.329693	-0.974735	0.329693	15	15	0.345311		230	235	110	-0.103695	0.917411	-0.103695	0.917411	15	15	0.934887		211	254	91
3419.79	2924.16	0.424	184	251	79	-1.13473	0.256488	-1.13473	0.256488	14	15	0.270299		215	250	95	-0.725866	0.467921	-0.725866	0.467921	15	15	0.486365		216	249	96	-0.684388	0.493731	-0.684388	0.493731	15	15	0.512486		234	231	111	0.0622171	0.95039	0.0622171	0.95039	15	15	0.967417		216	249	96
3421.72	2922.51	0.424239	190	245	85	-0.872872	0.382734	-0.872872	0.382734	14	15	0.400494		222	243	102	-0.43552	0.663186	-0.43552	0.663186	15	15	0.682674		221	244	101	-0.476998	0.633364	-0.476998	0.633364	15	15	0.65287		238	227	107	0.228129	0.819546	0.228129	0.819546	15	15	0.838135		218	247	98
3423.65	2920.86	0.424478	188	247	83	-0.960159	0.336976	-0.960159	0.336976	14	15	0.353554		219	246	99	-0.559954	0.575511	-0.559954	0.575511	15	15	0.594884		221	244	101	-0.476998	0.633364	-0.476998	0.633364	15	15	0.65287		235	230	110	0.103695	0.917411	0.103695	0.917411	15	15	0.934887		217	248	97
3425.58	2919.22	0.424717	189	246	84	-0.916515	0.359397	-0.916515	0.359397	14	15	0.376588		211	254	91	-0.891778	0.372512	-0.891778	0.372512	15	15	0.389233		213	252	93	-0.808822	0.418618	-0.808822	0.418618	15	15	0.436289		234	231	111	0.0622171	0.95039	0.0622171	0.95039	15	15	0.967417		218	247	98
3427.51	2917.57	0.424957	189	246	84	-0.916515	0.359397	-0.916515	0.359397	14	15	0.376588		216	249	96	-0.684388	0.493731	-0.684388	0.493731	15	15	0.512486		216	249	96	-0.684388	0.493731	-0.684388	0.493731	15	15	0.512486		236	229	109	0.145173	0.884574	0.145173	0.884574	15	15	0.902462		213	252	93
3429.43	2915.93	0.425196	193	242	88	-0.741941	0.458124	-0.741941	0.458124	14	15	0.477307		223	242	103	-0.394042	0.693551	-0.394042	0.693551	15	15	0.712965		215	250	95	-0.725866	0.467921	-0.725866	0.467921	15	15	0.486365		243	222	102	0.43552	0.663186	0.43552	0.663186	15	15	0.682674		215	250	95
3431.36	2914.29	0.425435	193	242	88	-0.741941	0.458124	-0.741941	0.458124	14	15	0.477307		215	250	95	-0.725866	0.467921	-0.725866	0.467921	15	15	0.486365		220	245	100	-0.518476	0.604127	-0.518476	0.604127	15	15	0.623594		238	227	107	0.228129	0.819546	0.228129	0.819546	15	15	0.838135		216	249	96
3433.29	2912.66	0.425674	187	248	82	-1.0038	0.315475	-1.0038	0.315475	14	15	0.331405		218	247	98	-0.601432	0.547553	-0.601432	0.547553	15	15	0.566774		215	250	95	-0.725866	0.467921	-0.725866	0.467921	15	15	0.486365		238	227	107	0.228129	0.819546	0.228129	0.819546	15	15	0.838135		216	249	96
3435.22	2911.02	0.425913	184	251	79	-1.13473	0.256488	-1.13473	0.256488	14	15	0.270299		215	250	95	-0.725866	0.467921	-0.725866	0.467921	15	15	0.486365		219	246	99	-0.559954	0.575511	-0.559954	0.575511	15	15	0.594884		240	225	105	0.311086	0.755736	0.311086	0.755736	15	15	0.77484		211	254	91
3437.15	2909.39	0.426152	184	251	79	-1.13473	0.256488	-1.13473	0.256488	14	15	0.270299		216	249	96	-0.684388	0.493731	-0.684388	0.493731	15	15	0.512486		217	248	97	-0.64291	0.520283	-0.64291	0.520283	15	15	0.539299		245	220	100	0.518476	0.604127	0.518476	0.604127	15	15	0.623594		210	255	90
3439.08	2907.76	0.426391	182	253	77	-1.22202	0.221701	-1.22202	0.221701	14	15	0.234007		215	250	95	-0.725866	0.467921	-0.725866	0.467921	15	15	0.486365		213	252	93	-0.808822	0.418618	-0.808822	0.418618	15	15	0.436289		235	230	110	0.103695	0.917411	0.103695	0.917411	15	15	0.934887		208	257	88
3441.01	2906.13	0.426631	186	249	81	-1.04745	0.294895	-1.04745	0.294895	14	15	0.310143		216	249	96	-0.684388	0.493731	-0.684388	0.493731	15	15	0.512486		217	248	97	-0.64291	0.520283	-0.64291	0.520283	15	15	0.539299		242	223	103	0.394042	0.693551	0.394042	0.693551	15	15	0.712965		205	260	85
3442.94	2904.5	0.42687	190	245	85	-0.872872	0.382734	-0.872872	0.382734	14	15	0.400494		218	247	98	-0.601432	0.547553	-0.601432	0.547553	15	15	0.566774		217	248	97	-0.64291	0.520283	-0.64291	0.520283	15	15	0.539299		237	228	108	0.186651	0.851934	0.186651	0.851934	15	15	0.870194		206	259	86
3444.87	2902.87	0.427109	188	247	83	-0.960159	0.336976	-0.960159	0.336976	14	15	0.353554		210	255	90	-0.933257	0.350688	-0.933257	0.350688	15	15	0.366875		221	244	101	-0.476998	0.633364	-0.476998	0.633364	15	15	0.65287		233	232	112	0.020739	0.983454	0.020739	0.983454	15	15	1		206	259	86
3446.79	2901.25	0.427348	197	238	92	-0.567367	0.570466	-0.567367	0.570466	14	15	0.590745		218	247	98	-0.601432	0.547553	-0.601432	0.547553	15	15	0.566774		226	239	106	-0.269607	0.787462	-0.269607	0.787462	15	15	0.806334		236	229	109	0.145173	0.884574	0.145173	0.884574	15	15	0.902462		216	249	96
3448.72	2899.62	0.427587	199	236	94	-0.480079	0.631171	-0.480079	0.631171	14	15	0.651619		224	241	104	-0.352564	0.724416	-0.352564	0.724416	15	15	0.743702		225	240	105	-0.311086	0.755736	-0.311086	0.755736	15	15	0.77484		240	225	105	0.311086	0.755736	0.311086	0.755736	15	15	0.77484		215	250	95
3450.65	2898	0.427826	197	238	92	-0.567367	0.570466	-0.567367	0.570466	14	15	0.590745		222	243	102	-0.43552	0.663186	-0.43552	0.663186	15	15	0.682674		222	243	102	-0.43552	0.663186	-0.43552	0.663186	15	15	0.682674		248	217	97	0.64291	0.520283	0.64291	0.520283	15	15	0.539299		214	251	94
3452.58	2896.38	0.428065	195	240	90	-0.654654	0.512691	-0.654654	0.512691	14	15	0.532545		212	253	92	-0.8503	0.395159	-0.8503	0.395159	15	15	0.412376		219	246	99	-0.559954	0.575511	-0.559954	0.575511	15	15	0.594884		245	220	100	0.518476	0.604127	0.518476	0.604127	15	15	0.623594		213	252	93
3454.51	2894.77	0.428305	194	241	89	-0.698297	0.484992	-0.698297	0.484992	14	15	0.504539		216	249	96	-0.684388	0.493731	-0.684388	0.493731	15	15	0.512486		221	244	101	-0.476998	0.633364	-0.476998	0.633364	15	15	0.65287		237	228	108	0.186651	0.851934	0.186651	0.851934	15	15	0.870194		206	259	86
3456.44	2893.15	0.428544	187	248	82	-1.0038	0.315475	-1.0038	0.315475	14	15	0.331405		219	246	99	-0.559954	0.575511	-0.559954	0.575511	15	15	0.594884		207	258	87	-1.05769	0.290197	-1.05769	0.290197	15	15	0.304591		231	234	111	-0.0622171	0.95039	-0.0622171	0.95039	15	15	0.967417		204	261	84
3458.37	2891.54	0.428783	188	247	83	-0.960159	0.336976	-0.960159	0.336976	14	15	0.353554		218	247	98	-0.601432	0.547553	-0.601432	0.547553	15	15	0.566774		208	257	88	-1.01621	0.309529	-1.01621	0.309529	15	15	0.324548		227	238	107	-0.228129	0.819546	-0.228129	0.819546	15	15	0.838135		204	261	84
3460.3	2889.93	0.429022	189	246	84	-0.916515	0.359397	-0.916515	0.359397	14	15	0.376588		221	244	101	-0.476998	0.633364	-0.476998	0.633364	15	15	0.65287		223	242	103	-0.394042	0.693551	-0.394042	0.693551	15	15	0.712965		233	232	112	0.020739	0.983454	0.020739	0.983454	15	15	1		209	256	89
3462.22	2888.32	0.429261	186	249	81	-1.04745	0.294895	-1.04745	0.294895	14	15	0.310143		219	246	99	-0.559954	0.575511	-0.559954	0.575511	15	15	0.594884		222	243	102	-0.43552	0.663186	-0.43552	0.663186	15	15	0.682674		235	230	110	0.103695	0.917411	0.103695	0.917411	15	15	0.934887		214	251	94
3464.15	2886.71	0.4295	193	242	88	-0.741941	0.458124	-0.741941	0.458124	14	15	0.477307		219	246	99	-0.559954	0.575511	-0.559954	0.575511	15	15	0.594884		229	236	109	-0.145173	0.884574	-0.145173	0.884574	15	15	0.902462		251	214	94	0.767344	0.442877	0.767344	0.442877	15	15	0.460959		221	244	101
3466.08	2885.1	0.429739	194	241	89	-0.698297	0.484992	-0.698297	0.484992	14	15	0.504539		234	231	111	0.0622171	0.95039	0.0622171	0.95039	15	15	0.967417		231	234	111	-0.0622171	0.95039	-0.0622171	0.95039	15	15	0.967417		251	214	94	0.767344	0.442877	0.767344	0.442877	15	15	0.460959		216	249	96
3468.01	2883.5	0.429979	188	247	83	-0.960159	0.336976	-0.960159	0.336976	14	15	0.353554		227	238	107	-0.228129	0.819546	-0.228129	0.819546	15	15	0.838135		211	254	91	-0.891778	0.372512	-0.891778	0.372512	15	15	0.389233		250	215	95	0.725866	0.467921	0.725866	0.467921	15	15	0.486365		213	252	93
3469.94	2881.89	0.430218	191	244	86	-0.829228	0.406976	-0.829228	0.406976	14	15	0.425262		216	249	96	-0.684388	0.493731	-0.684388	0.493731	15	15	0.512486		200	265	80	-1.34804	0.177647	-1.34804	0.177647	15	15	0.187268		237	228	108	0.186651	0.851934	0.186651	0.851934	15	15	0.870194		202	263	82
3471.87	2880.29	0.430457	183	252	78	-1.17838	0.238647	-1.17838	0.238647	14	15	0.251712		211	254	91	-0.891778	0.372512	-0.891778	0.372512	15	15	0.389233		200	265	80	-1.34804	0.177647	-1.34804	0.177647	15	15	0.187268		230	235	110	-0.103695	0.917411	-0.103695	0.917411	15	15	0.934887		200	265	80
3473.8	2878.69	0.430696	187	248	82	-1.0038	0.315475	-1.0038	0.315475	14	15	0.331405		222	243	102	-0.43552	0.663186	-0.43552	0.663186	15	15	0.682674		203	262	83	-1.2236	0.221103	-1.2236	0.221103	15	15	0.232812		228	237	108	-0.186651	0.851934	-0.186651	0.851934	15	15	0.870194		203	262	83
3475.73	2877.1	0.430935	188	247	83	-0.960159	0.336976	-0.960159	0.336976	14	15	0.353554		224	241	104	-0.352564	0.724416	-0.352564	0.724416	15	15	0.743702		219	246	99	-0.559954	0.575511	-0.559954	0.575511	15	15	0.594884		231	234	111	-0.0622171	0.95039	-0.0622171	0.95039	15	15	0.967417		209	256	89
3477.66	2875.5	0.431174	194	241	89	-0.698297	0.484992	-0.698297	0.484992	14	15	0.504539		230	235	110	-0.103695	0.917411	-0.103695	0.917411	15	15	0.934887		223	242	103	-0.394042	0.693551	-0.394042	0.693551	15	15	0.712965		233	232	112	0.020739	0.983454	0.020739	0.983454	15	15	1		209	256	89
3479.58	2873.91	0.431413	189	246	84	-0.916515	0.359397	-0.916515	0.359397	14	15	0.376588		219	246	99	-0.559954	0.575511	-0.559954	0.575511	15	15	0.594884		212	253	92	-0.8503	0.395159	-0.8503	0.395159	15	15	0.412376		235	230	110	0.103695	0.917411	0.103695	0.917411	15	15	0.934887		206	259	86
3481.51	2872.31	0.431653	184	251	79	-1.13473	0.256488	-1.13473	0.256488	14	15	0.270299		223	242	103	-0.394042	0.693551	-0.394042	0.693551	15	15	0.712965		214	251	94	-0.767344	0.442877	-0.767344	0.442877	15	15	0.460959		233	232	112	0.020739	0.983454	0.020739	0.983454	15	15	1		210	255	90
3483.44	2870.72	0.431892	189	246	84	-0.916515	0.359397	-0.916515	0.359397	14	15	0.376588		228	237	108	-0.186651	0.851934	-0.186651	0.851934	15	15	0.870194		213	252	93	-0.808822	0.418618	-0.808822	0.418618	15	15	0.436289		239	226	106	0.269607	0.787462	0.269607	0.787462	15	15	0.806334		204	261	84
3485.37	2869.14	0.432131	201	234	96	-0.392792	0.694473	-0.392792	0.694473	14	15	0.71483		232	233	112	-0.020739	0.983454	-0.020739	0.983454	15	15	1		212	253	92	-0.8503	0.395159	-0.8503	0.395159	15	15	0.412376		240	225	105	0.311086	0.755736	0.311086	0.755736	15	15	0.77484		207	258	87
3487.3	2867.55	0.43237	204	231	99	-0.261861	0.793428	-0.261861	0.793428	14	15	0.813179		235	230	110	0.103695	0.917411	0.103695	0.917411	15	15	0.934887		213	252	93	-0.808822	0.418618	-0.808822	0.418618	15	15	0.436289		247	218	98	0.601432	0.547553	0.601432	0.547553	15	15	0.566774		212	253	92
3489.23	2865.96	0.432609	188	247	83	-0.960159	0.336976	-0.960159	0.336976	14	15	0.353554		223	242	103	-0.394042	0.693551	-0.394042	0.693551	15	15	0.712965		231	234	111	-0.0622171	0.95039	-0.0622171	0.95039	15	15	0.967417		241	224	104	0.352564	0.724416	0.352564	0.724416	15	15	0.743702		219	246	99
3491.16	2864.38	0.432848	186	249	81	-1.04745	0.294895	-1.04745	0.294895	14	15	0.310143		217	248	97	-0.64291	0.520283	-0.64291	0.520283	15	15	0.539299		230	235	110	-0.103695	0.917411	-0.103695	0.917411	15	15	0.934887		231	234	111	-0.0622171	0.95039	-0.0622171	0.95039	15	15	0.967417		217	248	97
3493.09	2862.8	0.433087	200	235	95	-0.436436	0.662521	-0.436436	0.662521	14	15	0.682954		246	219	99	0.559954	0.575511	0.559954	0.575511	15	15	0.594884		223	242	103	-0.394042	0.693551	-0.394042	0.693551	15	15	0.712965		241	224	104	0.352564	0.724416	0.352564	0.724416	15	15	0.743702		219	246	99
3495.01	2861.22	0.433327	201	234	96	-0.392792	0.694473	-0.392792	0.694473	14	15	0.71483		243	222	102	0.43552	0.663186	0.43552	0.663186	15	15	0.682674		222	243	102	-0.43552	0.663186	-0.43552	0.663186	15	15	0.682674		241	224	104	0.352564	0.724416	0.352564	0.724416	15	15	0.743702		214	251	94
3496.94	2859.64	0.433566	191	244	86	-0.829228	0.406976	-0.829228	0.406976	14	15	0.425262		224	241	104	-0.352564	0.724416	-0.352564	0.724416	15	15	0.743702		213	252	93	-0.808822	0.418618	-0.808822	0.418618	15	15	0.436289		231	234	111	-0.0622171	0.95039	-0.0622171	0.95039	15	15	0.967417		207	258	87
3498.87	2858.06	0.433805	182	253	77	-1.22202	0.221701	-1.22202	0.221701	14	15	0.234007		202	263	82	-1.26508	0.205843	-1.26508	0.205843	15	15	0.216857		209	256	89	-0.974735	0.329693	-0.974735	0.329693	15	15	0.345311		210	255	90	-0.933257	0.350688	-0.933257	0.350688	15	15	0.366875		197	268	77
3500.8	2856.49	0.434044	166	269	61	-1.92032	0.0548187	-1.92032	0.0548187	14	15	0.0567726		204	261	84	-1.18212	0.237157	-1.18212	0.237157	15	15	0.249556		218	247	98	-0.601432	0.547553	-0.601432	0.547553	15	15	0.566774		203	262	83	-1.2236	0.221103	-1.2236	0.221103	15	15	0.232812		199	266	79
3502.73	2854.92	0.434283	176	259	71	-1.48388	0.137841	-1.48388	0.137841	14	15	0.145619		220	245	100	-0.518476	0.604127	-0.518476	0.604127	15	15	0.623594		229	236	109	-0.145173	0.884574	-0.145173	0.884574	15	15	0.902462		219	246	99	-0.559954	0.575511	-0.559954	0.575511	15	15	0.594884		203	262	83
3504.66	2853.34	0.434522	183	252	78	-1.17838	0.238647	-1.17838	0.238647	14	15	0.251712		229	236	109	-0.145173	0.884574	-0.145173	0.884574	15	15	0.902462		232	233	112	-0.020739	0.983454	-0.020739	0.983454	15	15	1		219	246	99	-0.559954	0.575511	-0.559954	0.575511	15	15	0.594884		206	259	86
3506.59	2851.78	0.434761	181	254	76	-1.26566	0.205634	-1.26566	0.205634	14	15	0.217176		220	245	100	-0.518476	0.604127	-0.518476	0.604127	15	15	0.623594		227	238	107	-0.228129	0.819546	-0.228129	0.819546	15	15	0.838135		226	239	106	-0.269607	0.787462	-0.269607	0.787462	15	15	0.806334		204	261	84
3508.52	2850.21	0.435001	196	239	91	-0.61101	0.541193	-0.61101	0.541193	14	15	0.561291		212	253	92	-0.8503	0.395159	-0.8503	0.395159	15	15	0.412376		217	248	97	-0.64291	0.520283	-0.64291	0.520283	15	15	0.539299		227	238	107	-0.228129	0.819546	-0.228129	0.819546	15	15	0.838135		195	270	75
3510.45	2848.64	0.43524	199	236	94	-0.480079	0.631171	-0.480079	0.631171	14	15	0.651619		212	253	92	-0.8503	0.395159	-0.8503	0.395159	15	15	0.412376		214	251	94	-0.767344	0.442877	-0.767344	0.442877	15	15	0.460959		235	230	110	0.103695	0.917411	0.103695	0.917411	15	15	0.934887		196	269	76
3512.37	2847.08	0.435479	190	245	85	-0.872872	0.382734	-0.872872	0.382734	14	15	0.400494		226	239	106	-0.269607	0.787462	-0.269607	0.787462	15	15	0.806334		213	252	93	-0.808822	0.418618	-0.808822	0.418618	15	15	0.436289		238.5	226.5	106.5	0.248868	0.803463	0.248896	0.803441	15	15	0.806334		197	268	77
3514.3	2845.51	0.435718	174	261	69	-1.57117	0.116144	-1.57117	0.116144	14	15	0.122524		223	242	103	-0.394042	0.693551	-0.394042	0.693551	15	15	0.712965		206	259	86	-1.09917	0.271695	-1.09917	0.271695	15	15	0.285441		221	244	101	-0.476998	0.633364	-0.476998	0.633364	15	15	0.65287		198	267	78
3516.23	2843.95	0.435957	173	262	68	-1.61481	0.106352	-1.61481	0.106352	14	15	0.11207		214	251	94	-0.767344	0.442877	-0.767344	0.442877	15	15	0.460959		208	257	88	-1.01621	0.309529	-1.01621	0.309529	15	15	0.324548		212	253	92	-0.8503	0.395159	-0.8503	0.395159	15	15	0.412376		198	267	78
3518.16	2842.39	0.436196	165	270	60	-1.96396	0.0495355	-1.96396	0.0495355	14	15	0.0510899		212	253	92	-0.8503	0.395159	-0.8503	0.395159	15	15	0.412376		200	265	80	-1.34804	0.177647	-1.34804	0.177647	15	15	0.187268		212	253	92	-0.8503	0.395159	-0.8503	0.395159	15	15	0.412376		191	274	71
3520.09	2840.84	0.436435	164	271	59	-2.0076	0.0446862	-2.0076	0.0446862	14	15	0.045875		212	253	92	-0.8503	0.395159	-0.8503	0.395159	15	15	0.412376		201	264	81	-1.30656	0.191363	-1.30656	0.191363	15	15	0.201679		213	252	93	-0.808822	0.418618	-0.808822	0.418618	15	15	0.436289		191	274	71
3522.02	2839.28	0.436675	174	261	69	-1.57117	0.116144	-1.57117	0.116144	14	15	0.122524		214	251	94	-0.767344	0.442877	-0.767344	0.442877	15	15	0.460959		218	247	98	-0.601432	0.547553	-0.601432	0.547553	15	15	0.566774		221	244	101	-0.476998	0.633364	-0.476998	0.633364	15	15	0.65287		195	270	75
3523.95	2837.73	0.436914	182	253	77	-1.22202	0.221701	-1.22202	0.221701	14	15	0.234007		211	254	91	-0.891778	0.372512	-0.891778	0.372512	15	15	0.389233		225	240	105	-0.311086	0.755736	-0.311086	0.755736	15	15	0.77484		224	241	104	-0.352564	0.724416	-0.352564	0.724416	15	15	0.743702		200	265	80
3525.88	2836.17	0.437153	185	250	80	-1.09109	0.275234	-1.09109	0.275234	14	15	0.289776		209	256	89	-0.974735	0.329693	-0.974735	0.329693	15	15	0.345311		225	240	105	-0.311086	0.755736	-0.311086	0.755736	15	15	0.77484		221	244	101	-0.476998	0.633364	-0.476998	0.633364	15	15	0.65287		196	269	76
3527.8	2834.62	0.437392	184	251	79	-1.13473	0.256488	-1.13473	0.256488	14	15	0.270299		201	264	81	-1.30656	0.191363	-1.30656	0.191363	15	15	0.201679		218	247	98	-0.601432	0.547553	-0.601432	0.547553	15	15	0.566774		215	250	95	-0.725866	0.467921	-0.725866	0.467921	15	15	0.486365		188	277	68
3529.73	2833.08	0.437631	175	260	70	-1.52753	0.126631	-1.52753	0.126631	14	15	0.1337		216	249	96	-0.684388	0.493731	-0.684388	0.493731	15	15	0.512486		216	249	96	-0.684388	0.493731	-0.684388	0.493731	15	15	0.512486		210	255	90	-0.933257	0.350688	-0.933257	0.350688	15	15	0.366875		193	272	73
3531.66	2831.53	0.43787	177	258	72	-1.44024	0.149801	-1.44024	0.149801	14	15	0.158309		215	250	95	-0.725866	0.467921	-0.725866	0.467921	15	15	0.486365		207	258	87	-1.05769	0.290197	-1.05769	0.290197	15	15	0.304591		204	261	84	-1.18212	0.237157	-1.18212	0.237157	15	15	0.249556		191	274	71
3533.59	2829.98	0.438109	167	268	62	-1.87667	0.0605637	-1.87667	0.0605637	14	15	0.0629534		210	255	90	-0.933257	0.350688	-0.933257	0.350688	15	15	0.366875		206	259	86	-1.09917	0.271695	-1.09917	0.271695	15	15	0.285441		208	257	88	-1.01621	0.309529	-1.01621	0.309529	15	15	0.324548		184	281	64
3535.52	2828.44	0.438349	166	269	61	-1.92032	0.0548187	-1.92032	0.0548187	14	15	0.0567726		204	261	84	-1.18212	0.237157	-1.18212	0.237157	15	15	0.249556		211	254	91	-0.891778	0.372512	-0.891778	0.372512	15	15	0.389233		221	244	101	-0.476998	0.633364	-0.476998	0.633364	15	15	0.65287		177	288	57
3537.45	2826.9	0.438588	171	264	66	-1.7021	0.0887377	-1.7021	0.0887377	14	15	0.0932157		210	255	90	-0.933257	0.350688	-0.933257	0.350688	15	15	0.366875		217	248	97	-0.64291	0.520283	-0.64291	0.520283	15	15	0.539299		231	234	111	-0.0622171	0.95039	-0.0622171	0.95039	15	15	0.967417		183	282	63
3539.38	2825.36	0.438827	179	256	74	-1.35295	0.176072	-1.35295	0.176072	14	15	0.186083		219	246	99	-0.559954	0.575511	-0.559954	0.575511	15	15	0.594884		219	246	99	-0.559954	0.575511	-0.559954	0.575511	15	15	0.594884		227	238	107	-0.228129	0.819546	-0.228129	0.819546	15	15	0.838135		196	269	76
3541.31	2823.82	0.439066	169	266	64	-1.78939	0.0735535	-1.78939	0.0735535	14	15	0.076919		220	245	100	-0.518476	0.604127	-0.518476	0.604127	15	15	0.623594		216	249	96	-0.684388	0.493731	-0.684388	0.493731	15	15	0.512486		211	254	91	-0.891778	0.372512	-0.891778	0.372512	15	15	0.389233		206	259	86
3543.23	2822.28	0.439305	168	267	63	-1.83303	0.066799	-1.83303	0.066799	14	15	0.0696586		204	261	84	-1.18212	0.237157	-1.18212	0.237157	15	15	0.249556		211	254	91	-0.891778	0.372512	-0.891778	0.372512	15	15	0.389233		193	272	73	-1.63838	0.101343	-1.63838	0.101343	15	15	0.106446		195	270	75
3545.16	2820.74	0.439544	178	257	73	-1.39659	0.162537	-1.39659	0.162537	14	15	0.171789		218	247	98	-0.601432	0.547553	-0.601432	0.547553	15	15	0.566774		214	251	94	-0.767344	0.442877	-0.767344	0.442877	15	15	0.460959		205	260	85	-1.14065	0.254018	-1.14065	0.254018	15	15	0.267097		194	271	74
3547.09	2819.21	0.439783	177	258	72	-1.44024	0.149801	-1.44024	0.149801	14	15	0.158309		224	241	104	-0.352564	0.724416	-0.352564	0.724416	15	15	0.743702		213	252	93	-0.808822	0.418618	-0.808822	0.418618	15	15	0.436289		209	256	89	-0.974735	0.329693	-0.974735	0.329693	15	15	0.345311		197	268	77
3549.02	2817.68	0.440023	165	270	60	-1.96396	0.0495355	-1.96396	0.0495355	14	15	0.0510899		209	256	89	-0.974735	0.329693	-0.974735	0.329693	15	15	0.345311		210	255	90	-0.933257	0.350688	-0.933257	0.350688	15	15	0.366875		204	261	84	-1.18212	0.237157	-1.18212	0.237157	15	15	0.249556		201	264	81
3550.95	2816.15	0.440262	172	263	67	-1.65846	0.0972264	-1.65846	0.0972264	14	15	0.102309		215	250	95	-0.725866	0.467921	-0.725866	0.467921	15	15	0.486365		214	251	94	-0.767344	0.442877	-0.767344	0.442877	15	15	0.460959		208	257	88	-1.01621	0.309529	-1.01621	0.309529	15	15	0.324548		206	259	86
3552.88	2814.62	0.440501	175	260	70	-1.52753	0.126631	-1.52753	0.126631	14	15	0.1337		217	248	97	-0.64291	0.520283	-0.64291	0.520283	15	15	0.539299		216	249	96	-0.684388	0.493731	-0.684388	0.493731	15	15	0.512486		208	257	88	-1.01621	0.309529	-1.01621	0.309529	15	15	0.324548		196	269	76
3554.81	2813.09	0.44074	181	254	76	-1.26566	0.205634	-1.26566	0.205634	14	15	0.217176		213	252	93	-0.808822	0.418618	-0.808822	0.418618	15	15	0.436289		211	254	91	-0.891778	0.372512	-0.891778	0.372512	15	15	0.389233		215	250	95	-0.725866	0.467921	-0.725866	0.467921	15	15	0.486365		202	263	82
3556.74	2811.57	0.440979	180	255	75	-1.30931	0.190431	-1.30947	0.190377	14	15	0.201205		221	244	101	-0.476998	0.633364	-0.476998	0.633364	15	15	0.65287		211	254	91	-0.891778	0.372512	-0.891778	0.372512	15	15	0.389233		225	240	105	-0.311086	0.755736	-0.311086	0.755736	15	15	0.77484		195	270	75
[truncated: 283 more rows]
[truncated: 18 more columns]
