# Supplementary material
Source: MDPI journal article supplement (https://www.mdpi.com/2073-4441/13/11/1475)
Supplement: s1 [file s1 › Supplementary files/S2_1_02042018_File.xls]

## Sheet: Refraction
	Sample No.	1	2	3	4	5	6	7	8	9	10	11	12	13	14	15	16	17	18	19	20	21	22	23	24
	PreparationHC	HC	HC	ANLG	ANLG	HC	LYD	HC	HC	LYD	HC	HC	LYD	HC	EUF	LYD	EUF	EUF	HC	ANLG	ANLG	HC	HC	HC	EUF
Wavelength, cm-1		Refractive Index
1.2066		4.09494	4.20102	4.28798	4.35161	4.30016	4.22764	4.31289	4.53863	4.06659	4.29466	4.40466	4.29242	4.39695	4.34401	4.42468	4.5894	4.38264	4.43899	4.34865	4.33504	4.35255	4.01629	4.21736	4.19871
1.60879		3.5428	3.60288	3.64826	3.67293	3.65891	3.59962	3.65808	3.75951	3.50224	3.64255	3.71113	3.64477	3.71631	3.68114	3.73518	3.8287	3.67696	3.73785	3.66762	3.68497	3.67845	3.49256	3.61904	3.59503
2.01099		3.25732	3.29481	3.31758	3.32298	3.32657	3.27496	3.32194	3.36711	3.21055	3.30776	3.35596	3.31118	3.36329	3.33926	3.38029	3.43984	3.31957	3.37649	3.31792	3.3488	3.33374	3.21956	3.30673	3.27942
2.41319		3.08843	3.11393	3.12344	3.11798	3.13043	3.08384	3.12557	3.1442	3.0388	3.1123	3.14952	3.11571	3.15452	3.13899	3.17173	3.21354	3.11498	3.1645	3.11379	3.15076	3.13322	3.05701	3.12016	3.09094
2.81539		2.97819	2.99708	2.99813	2.98611	3.00314	2.96001	2.99948	3.0056	2.92756	2.98654	3.01765	2.98984	3.01865	3.01018	3.03674	3.06858	2.98668	3.02755	2.98261	3.02222	3.00485	2.95027	2.99704	2.96707
3.21759		2.90099	2.91624	2.91145	2.89536	2.91478	2.874	2.91278	2.91323	2.85045	2.8995	2.92731	2.90312	2.92404	2.92157	2.94312	2.9689	2.90049	2.93262	2.89209	2.93269	2.91659	2.87511	2.90982	2.88011
3.61979		2.8443	2.85764	2.84848	2.82994	2.85056	2.81133	2.85027	2.8483	2.7945	2.83597	2.8622	2.8405	2.85508	2.85771	2.87505	2.89677	2.83954	2.86345	2.82632	2.86717	2.85272	2.81963	2.845	2.81636
4.02199		2.80144	2.81391	2.80125	2.78136	2.80253	2.76423	2.80378	2.80087	2.75276	2.78796	2.81366	2.79394	2.8034	2.8103	2.82406	2.84275	2.79484	2.8114	2.77688	2.81766	2.8049	2.77751	2.79537	2.76848
4.42418		2.7686	2.78083	2.76525	2.74477	2.76611	2.72829	2.76867	2.76538	2.72125	2.75098	2.77681	2.75878	2.76415	2.77455	2.78529	2.80146	2.76134	2.7716	2.73899	2.77961	2.76842	2.74513	2.75686	2.73216
4.82638		2.74346	2.75581	2.73774	2.71722	2.73845	2.70086	2.74209	2.73858	2.69756	2.72242	2.74873	2.73223	2.73436	2.74754	2.7558	2.76969	2.73605	2.74112	2.70982	2.75026	2.74051	2.7203	2.72698	2.70471
5.22858		2.72449	2.73716	2.71698	2.69679	2.71765	2.68024	2.72223	2.71849	2.68007	2.70067	2.72758	2.71245	2.71206	2.72737	2.73364	2.74536	2.7171	2.71814	2.68763	2.72785	2.7194	2.7016	2.70409	2.68436
5.63078		2.7106	2.72367	2.70176	2.68217	2.70236	2.66528	2.70784	2.7038	2.66767	2.68465	2.71214	2.6982	2.69585	2.71271	2.7175	2.72706	2.70325	2.70144	2.67121	2.71117	2.70391	2.68802	2.68706	2.66984
6.03298		2.70094	2.7144	2.69122	2.67237	2.69151	2.65513	2.69799	2.69358	2.65946	2.67357	2.70149	2.68856	2.68465	2.70255	2.70635	2.71372	2.69361	2.69014	2.65973	2.69927	2.69318	2.67879	2.675	2.66015
6.43518		2.69473	2.70851	2.68457	2.66654	2.68418	2.64906	2.6919	2.68706	2.65463	2.66675	2.69484	2.68272	2.67753	2.69602	2.69935	2.70443	2.68738	2.68347	2.65246	2.69135	2.68642	2.6732	2.66709	2.65445
6.83738		2.69122	2.70518	2.68108	2.66388	2.67945	2.64635	2.68879	2.68347	2.65238	2.66345	2.69142	2.67993	2.67358	2.6923	2.69565	2.69833	2.68382	2.68068	2.6487	2.68663	2.68286	2.67055	2.66256	2.65192
7.23958		2.68956	2.70355	2.67991	2.66348	2.67641	2.64619	2.68784	2.68202	2.65186	2.66287	2.69038	2.67936	2.67188	2.69054	2.69436	2.69454	2.68209	2.68092	2.64765	2.68423	2.68165	2.67003	2.66052	2.65166
7.64178		2.68885	2.7027	2.68014	2.66438	2.67409	2.64763	2.68815	2.68181	2.65214	2.66404	2.69071	2.6801	2.67141	2.68979	2.6945	2.69212	2.68126	2.68318	2.64839	2.6832	2.68179	2.67076	2.66001	2.65272
8.04397		2.68815	2.70169	2.68073	2.66551	2.67156	2.6496	2.68873	2.68191	2.65226	2.66586	2.69135	2.68116	2.67114	2.68911	2.69502	2.6901	2.68033	2.68632	2.64985	2.68252	2.68223	2.67172	2.66002	2.65402
8.44617		2.68653	2.69963	2.68064	2.66581	2.66797	2.65097	2.68862	2.68138	2.65132	2.66721	2.6912	2.68154	2.67007	2.68756	2.69483	2.68757	2.67834	2.68913	2.65091	2.68117	2.6819	2.67192	2.65952	2.65451
8.84837		2.68324	2.69584	2.67894	2.66436	2.66268	2.65072	2.68697	2.67943	2.64859	2.66706	2.6893	2.68039	2.66739	2.68437	2.69303	2.68374	2.67451	2.69046	2.65053	2.67829	2.67988	2.67047	2.65764	2.6533
9.25057		2.67778	2.68987	2.67499	2.66053	2.65534	2.64811	2.68316	2.67548	2.64361	2.66462	2.685	2.67708	2.66255	2.67904	2.68894	2.67808	2.66837	2.68945	2.64789	2.67325	2.6755	2.66674	2.65372	2.64973
9.65277		2.66996	2.68161	2.66845	2.65406	2.64592	2.64276	2.67691	2.66925	2.63625	2.65949	2.67801	2.67132	2.65534	2.67137	2.68226	2.67033	2.65981	2.68558	2.64256	2.66581	2.66848	2.66045	2.64742	2.64357
10.055		2.6599	2.67124	2.65937	2.64504	2.63465	2.63469	2.66821	2.66077	2.62665	2.65165	2.66846	2.66315	2.64588	2.66149	2.67302	2.66052	2.64906	2.67876	2.63447	2.65604	2.65888	2.65166	2.63875	2.6349
10.4572		2.64796	2.65915	2.64811	2.63387	2.62196	2.62425	2.65737	2.6503	2.61519	2.64138	2.65674	2.65286	2.63453	2.64977	2.66158	2.64893	2.63662	2.66929	2.62392	2.64429	2.64707	2.64072	2.62796	2.62413
10.8594		2.63462	2.64582	2.63518	2.6211	2.60832	2.61202	2.64487	2.63829	2.60238	2.62923	2.64345	2.64093	2.62178	2.6367	2.64847	2.63598	2.62307	2.65771	2.61145	2.63108	2.63359	2.62815	2.61552	2.61181
11.2616		2.62042	2.63178	2.62118	2.60735	2.5942	2.59862	2.63125	2.62525	2.58872	2.61582	2.62923	2.62789	2.60816	2.62284	2.63432	2.62213	2.60898	2.6447	2.59769	2.61701	2.61908	2.61455	2.60197	2.5985
11.6638		2.60588	2.61748	2.60668	2.59317	2.57999	2.58465	2.61709	2.61171	2.57469	2.60178	2.61469	2.61426	2.59416	2.60869	2.61972	2.60789	2.59485	2.63095	2.5833	2.60263	2.60413	2.60045	2.58787	2.58473
12.066		2.59141	2.6033	2.59216	2.57902	2.56596	2.57061	2.60288	2.59812	2.56068	2.58765	2.6003	2.60049	2.58016	2.59468	2.60519	2.59365	2.58102	2.61709	2.56884	2.5884	2.58926	2.58634	2.5737	2.5709
12.4682		2.57733	2.5895	2.57798	2.56522	2.55228	2.55685	2.589	2.58481	2.54696	2.57384	2.58641	2.58692	2.56645	2.58112	2.59111	2.57975	2.56768	2.60359	2.55476	2.57466	2.57488	2.57254	2.55986	2.55728
12.8704		2.56385	2.57622	2.56436	2.55196	2.53904	2.5436	2.5757	2.57201	2.53372	2.56063	2.57322	2.57378	2.5532	2.56819	2.57774	2.5664	2.55492	2.59075	2.54133	2.56163	2.56123	2.55927	2.54657	2.54402
13.2726		2.55105	2.56352	2.5514	2.53931	2.52625	2.53093	2.56311	2.55979	2.52102	2.54812	2.56079	2.56116	2.54046	2.55596	2.56516	2.5537	2.54271	2.5787	2.5287	2.54936	2.54842	2.5466	2.53396	2.53116
13.6748		2.53892	2.55137	2.53907	2.52724	2.51388	2.51883	2.5512	2.54816	2.50886	2.53632	2.54907	2.54909	2.52823	2.5444	2.55335	2.54164	2.53097	2.56743	2.51684	2.5378	2.53643	2.53453	2.522	2.51868
14.077		2.5274	2.53971	2.52729	2.51567	2.50187	2.50721	2.53989	2.53701	2.49721	2.52512	2.53796	2.53752	2.51645	2.53341	2.5422	2.53015	2.51958	2.55678	2.50566	2.52685	2.52515	2.52296	2.5106	2.50652
14.4792		2.51637	2.52843	2.51594	2.50447	2.49018	2.49595	2.52905	2.52623	2.48596	2.51437	2.52729	2.52636	2.50502	2.52286	2.53153	2.51913	2.50846	2.54658	2.495	2.51634	2.51443	2.51178	2.49963	2.49463
14.8814		2.50571	2.51746	2.50489	2.49355	2.47877	2.48494	2.51854	2.51571	2.47506	2.50393	2.51693	2.5155	2.49389	2.51261	2.52118	2.50845	2.49752	2.53664	2.48468	2.50613	2.50411	2.50087	2.48894	2.48297
15.2836		2.49531	2.50671	2.49404	2.48281	2.46762	2.4741	2.50822	2.50533	2.46442	2.49366	2.50677	2.50487	2.48298	2.50255	2.511	2.49799	2.48674	2.52679	2.47456	2.49609	2.49402	2.49015	2.47841	2.47151
15.6858		2.48508	2.49614	2.48333	2.4722	2.45671	2.46339	2.49802	2.49506	2.45398	2.48347	2.49673	2.4944	2.47227	2.49257	2.50089	2.48769	2.47611	2.51695	2.46453	2.48614	2.48406	2.47958	2.46798	2.46027
16.088		2.47498	2.48573	2.47274	2.46171	2.44605	2.45279	2.4879	2.48485	2.44373	2.47334	2.48676	2.48406	2.46174	2.48264	2.4908	2.4775	2.46565	2.50706	2.45455	2.47625	2.47415	2.46912	2.45761	2.44926
16.4901		2.46498	2.47548	2.46227	2.45133	2.43563	2.44232	2.47784	2.47471	2.43363	2.46326	2.47688	2.47384	2.45138	2.47273	2.48073	2.46739	2.45538	2.49715	2.4446	2.46642	2.46427	2.45879	2.44732	2.43852
16.8923		2.45507	2.46539	2.45194	2.44111	2.42546	2.43201	2.46786	2.46468	2.4237	2.45326	2.4671	2.46374	2.44121	2.46286	2.4707	2.45738	2.44534	2.48724	2.4347	2.45666	2.45443	2.44862	2.43715	2.42807
17.2945		2.44527	2.45548	2.4418	2.43106	2.41552	2.42191	2.45799	2.45477	2.41394	2.44339	2.45743	2.45379	2.43124	2.45305	2.46074	2.44748	2.43553	2.47742	2.42488	2.447	2.44466	2.43864	2.42713	2.41791
17.6967		2.43561	2.44576	2.43187	2.42122	2.40581	2.41205	2.44828	2.44502	2.40435	2.4337	2.44793	2.44402	2.42149	2.44334	2.45093	2.43772	2.42596	2.46773	2.41521	2.43747	2.43499	2.42887	2.41731	2.40806
18.0989		2.4261	2.43623	2.42218	2.41161	2.39631	2.40244	2.43876	2.43546	2.39496	2.42422	2.4386	2.43445	2.41195	2.43377	2.44129	2.42811	2.41662	2.45824	2.4057	2.4281	2.42547	2.41933	2.40772	2.3985
18.5011		2.41678	2.4269	2.41274	2.40224	2.387	2.39311	2.42944	2.42609	2.38577	2.41498	2.42948	2.42509	2.40265	2.42439	2.43188	2.41869	2.40749	2.44898	2.3964	2.41891	2.41614	2.41004	2.39837	2.38922
18.9033		2.40766	2.41777	2.40354	2.39312	2.37788	2.38404	2.42035	2.41692	2.37679	2.40599	2.42056	2.41597	2.39356	2.41521	2.4227	2.40945	2.39856	2.43997	2.38733	2.4099	2.40704	2.40098	2.38926	2.38019
19.3055		2.39876	2.40885	2.39458	2.38425	2.36892	2.37523	2.41148	2.40796	2.36802	2.39725	2.41185	2.40709	2.38469	2.40626	2.41378	2.40041	2.38981	2.43122	2.37848	2.40108	2.39817	2.39216	2.38038	2.3714
19.7077		2.39009	2.40012	2.38584	2.3756	2.36014	2.36667	2.40284	2.3992	2.35947	2.38874	2.40334	2.39844	2.37603	2.39755	2.4051	2.39157	2.38121	2.42271	2.36987	2.39245	2.38955	2.38355	2.37172	2.36281
20.1099		2.38164	2.39159	2.37731	2.36718	2.35152	2.35832	2.3944	2.39064	2.35113	2.38045	2.39503	2.39002	2.36757	2.38908	2.39665	2.38292	2.37277	2.41443	2.36148	2.384	2.38116	2.37514	2.36325	2.35442
20.5121		2.37341	2.38325	2.36896	2.35896	2.34308	2.35018	2.38616	2.38228	2.343	2.37236	2.3869	2.38181	2.3593	2.38085	2.3884	2.37447	2.36447	2.40635	2.35331	2.37572	2.37301	2.36692	2.35496	2.34623
20.9143		2.36538	2.37509	2.36078	2.35093	2.33482	2.34222	2.37812	2.37411	2.33506	2.36446	2.37895	2.37381	2.35123	2.37284	2.38034	2.36622	2.35634	2.39847	2.34534	2.36762	2.36508	2.35889	2.34684	2.33821
21.3165		2.35757	2.36713	2.35278	2.34308	2.32676	2.33444	2.37025	2.36615	2.32731	2.35673	2.37117	2.36599	2.34334	2.36505	2.37247	2.35816	2.34838	2.39077	2.33757	2.3597	2.35734	2.35103	2.3389	2.33039
21.7187		2.34994	2.35936	2.34496	2.33542	2.3189	2.32685	2.36257	2.35839	2.31975	2.34917	2.36357	2.35835	2.33565	2.35746	2.36476	2.35031	2.34061	2.38324	2.33	2.35197	2.34981	2.34335	2.33114	2.32275
22.1209		2.34252	2.35179	2.33732	2.32795	2.31126	2.31943	2.35508	2.35085	2.31238	2.34179	2.35616	2.35089	2.32815	2.35006	2.35724	2.34267	2.33304	2.37588	2.32262	2.34443	2.34247	2.33586	2.32357	2.31532
22.5231		2.33529	2.34444	2.32989	2.32068	2.30386	2.3122	2.34778	2.34352	2.30519	2.3346	2.34894	2.34362	2.32087	2.34287	2.34991	2.33525	2.3257	2.36871	2.31543	2.33711	2.33533	2.32857	2.31621	2.30808
22.9253		2.32827	2.3373	2.32267	2.3136	2.29669	2.30518	2.34067	2.33641	2.29821	2.3276	2.34192	2.33653	2.3138	2.33588	2.34278	2.32806	2.31858	2.36171	2.30845	2.33001	2.3284	2.32149	2.30906	2.30106
23.3275		2.32145	2.3304	2.31568	2.30674	2.28977	2.29836	2.33378	2.32953	2.29142	2.32082	2.33512	2.32964	2.30696	2.32909	2.33587	2.32111	2.31171	2.3549	2.30168	2.32315	2.32168	2.31463	2.30215	2.29425
23.7297		2.31485	2.32373	2.30893	2.30009	2.2831	2.29175	2.32711	2.32286	2.28485	2.31425	2.32853	2.32295	2.30034	2.32252	2.32918	2.31439	2.30508	2.34829	2.29512	2.31652	2.31517	2.30799	2.29546	2.28765
24.1319		2.30847	2.3173	2.30241	2.29366	2.27666	2.28535	2.32065	2.31641	2.2785	2.30789	2.32216	2.31648	2.29394	2.31615	2.32272	2.3079	2.29869	2.34189	2.28878	2.31012	2.30888	2.30157	2.289	2.28126
24.5341		2.30231	2.3111	2.29613	2.28745	2.27046	2.27917	2.31442	2.31016	2.27236	2.30176	2.316	2.31022	2.28777	2.31001	2.31649	2.30164	2.29252	2.33568	2.28264	2.30395	2.30281	2.29538	2.28277	2.27509
24.9363		2.29636	2.30512	2.29007	2.28144	2.26446	2.27318	2.30839	2.30411	2.26643	2.29582	2.31005	2.30418	2.28181	2.30407	2.31048	2.29561	2.28658	2.32967	2.2767	2.298	2.29695	2.28941	2.27675	2.26911
25.3385		2.29061	2.29935	2.28422	2.27564	2.25868	2.26739	2.30258	2.29825	2.2607	2.29009	2.30429	2.29835	2.27605	2.29833	2.30468	2.28978	2.28084	2.32385	2.27096	2.29225	2.29128	2.28364	2.27093	2.26333
25.7407		2.28506	2.29378	2.27856	2.27003	2.25308	2.26178	2.29696	2.29257	2.25517	2.28453	2.29872	2.29272	2.27048	2.29278	2.29907	2.28416	2.2753	2.31823	2.2654	2.28669	2.28579	2.27807	2.26531	2.25773
26.1429		2.27969	2.2884	2.27308	2.2646	2.24765	2.25635	2.29152	2.28708	2.24983	2.27915	2.29332	2.28728	2.26509	2.28742	2.29364	2.27873	2.26993	2.31279	2.26001	2.2813	2.28048	2.27269	2.25988	2.25232
26.5451		2.2745	2.28319	2.26778	2.25935	2.2424	2.25108	2.28626	2.28176	2.24468	2.27394	2.28809	2.28204	2.25988	2.28224	2.28838	2.2735	2.26473	2.30752	2.25479	2.27609	2.27533	2.26748	2.25463	2.24708
26.9473		2.26948	2.27815	2.26263	2.25428	2.23732	2.24598	2.28117	2.27663	2.2397	2.26888	2.28302	2.27698	2.25484	2.27723	2.28329	2.26845	2.25969	2.30243	2.24973	2.27103	2.27034	2.26244	2.24955	2.24201
27.3495		2.26463	2.27327	2.25764	2.24937	2.2324	2.24105	2.27624	2.27167	2.23489	2.26398	2.27811	2.2721	2.24996	2.27239	2.27837	2.26358	2.25481	2.2975	2.24484	2.26612	2.26551	2.25757	2.24464	2.23712
27.7517		2.25994	2.26856	2.2528	2.24463	2.22766	2.23627	2.27148	2.26689	2.23026	2.25923	2.27336	2.26739	2.24524	2.26772	2.2736	2.25889	2.25008	2.29274	2.24011	2.26137	2.26084	2.25285	2.23989	2.23239
28.1539		2.25542	2.264	2.24813	2.24006	2.22308	2.23167	2.26687	2.26228	2.22579	2.25463	2.26876	2.26285	2.24069	2.26322	2.26899	2.25438	2.24552	2.28814	2.23554	2.25678	2.25633	2.2483	2.2353	2.22784
28.5561		2.25107	2.25961	2.24361	2.23565	2.21866	2.22723	2.26242	2.25784	2.22148	2.25019	2.26432	2.25848	2.2363	2.25889	2.26454	2.25003	2.2411	2.28369	2.23114	2.25234	2.25198	2.2439	2.23086	2.22346
28.9583		2.24688	2.25537	2.23924	2.2314	2.21441	2.22295	2.25812	2.25355	2.21733	2.24589	2.26002	2.25425	2.23206	2.25471	2.26025	2.24583	2.23684	2.27939	2.22689	2.24805	2.24779	2.23966	2.22657	2.21923
29.3605		2.24284	2.25129	2.23503	2.2273	2.21032	2.21883	2.25397	2.24941	2.21332	2.24173	2.25588	2.25017	2.22797	2.25069	2.25611	2.24177	2.23272	2.27523	2.22279	2.2439	2.24377	2.23556	2.22241	2.21516
29.7627		2.23894	2.24734	2.23097	2.22333	2.20638	2.21485	2.24996	2.24539	2.20945	2.23771	2.25186	2.24622	2.22401	2.24681	2.25211	2.23784	2.22873	2.2712	2.21883	2.23989	2.23989	2.2316	2.21838	2.21124
30.1649		2.23518	2.24353	2.22704	2.21951	2.20257	2.21101	2.24608	2.24149	2.20571	2.23382	2.24797	2.2424	2.22019	2.24305	2.24825	2.23403	2.22487	2.26728	2.215	2.23601	2.23615	2.22777	2.21447	2.20745
30.5671		2.23155	2.23983	2.22323	2.2158	2.19888	2.2073	2.24232	2.2377	2.20208	2.23005	2.2442	2.23869	2.21648	2.23942	2.24451	2.23032	2.22112	2.26348	2.21129	2.23224	2.23255	2.22405	2.21067	2.20378
30.9693		2.22802	2.23625	2.21953	2.2122	2.19531	2.20371	2.23868	2.234	2.19856	2.22639	2.24053	2.23508	2.21289	2.23589	2.2409	2.2267	2.21748	2.25979	2.20769	2.22859	2.22906	2.22045	2.20698	2.20023
31.3715		2.2246	2.23278	2.21593	2.20872	2.19183	2.20022	2.23513	2.23039	2.19514	2.22284	2.23696	2.23157	2.20941	2.23248	2.23739	2.22319	2.21393	2.2562	2.2042	2.22504	2.22568	2.21695	2.2034	2.19679
31.7737		2.22127	2.2294	2.21242	2.20533	2.18846	2.19685	2.23167	2.22689	2.19181	2.21939	2.23348	2.22816	2.20603	2.22916	2.234	2.21976	2.21047	2.2527	2.2008	2.22158	2.2224	2.21354	2.19991	2.19346
32.1759		2.21804	2.22611	2.20899	2.20203	2.18517	2.19358	2.22831	2.22348	2.18859	2.21605	2.2301	2.22484	2.20276	2.22596	2.2307	2.21643	2.2071	2.2493	2.19751	2.21822	2.21922	2.21023	2.19652	2.19022
32.5781		2.2149	2.22292	2.20565	2.19884	2.18197	2.19041	2.22504	2.22017	2.18547	2.21279	2.22681	2.22163	2.19958	2.22285	2.2275	2.2132	2.20381	2.246	2.1943	2.21496	2.21613	2.207	2.19323	2.18709
32.9803		2.21184	2.21981	2.20239	2.19573	2.17886	2.18734	2.22187	2.21696	2.18244	2.20963	2.22361	2.21851	2.19649	2.21985	2.22439	2.21006	2.2006	2.24279	2.1912	2.21179	2.21313	2.20387	2.19003	2.18405
33.3825		2.20888	2.21679	2.19921	2.19271	2.17584	2.18436	2.21878	2.21385	2.17951	2.20656	2.22051	2.21548	2.1935	2.21694	2.22138	2.20702	2.19749	2.23967	2.18818	2.2087	2.21022	2.20082	2.18693	2.1811
33.7847		2.206	2.21386	2.19613	2.18978	2.17291	2.18147	2.21579	2.21084	2.17666	2.20358	2.2175	2.21255	2.19059	2.21412	2.21845	2.20408	2.19445	2.23664	2.18525	2.20571	2.20738	2.19786	2.18391	2.17823
34.1869		2.2032	2.21101	2.19314	2.18693	2.17005	2.17866	2.21289	2.20791	2.17389	2.20068	2.21458	2.2097	2.18777	2.21137	2.21558	2.20122	2.1915	2.23368	2.18241	2.2028	2.20462	2.19498	2.18098	2.17544
34.5891		2.20047	2.20823	2.19025	2.18414	2.16728	2.17591	2.21008	2.20505	2.17118	2.19786	2.21173	2.20693	2.18501	2.20867	2.21279	2.19844	2.18862	2.2308	2.17963	2.19997	2.20192	2.19218	2.17814	2.17271
34.9913		2.19778	2.20552	2.18746	2.1814	2.16457	2.17321	2.20733	2.20225	2.16852	2.19511	2.20895	2.20421	2.1823	2.20599	2.21004	2.19573	2.18581	2.22798	2.17691	2.1972	2.19926	2.18946	2.17537	2.17004
35.3935		2.19513	2.20285	2.18476	2.17872	2.16192	2.17055	2.20464	2.19951	2.16588	2.19241	2.20621	2.20153	2.17963	2.20331	2.20732	2.19306	2.18306	2.2252	2.17424	2.1945	2.19662	2.18679	2.17268	2.1674
35.7957		2.19249	2.20023	2.18215	2.17606	2.15931	2.16791	2.20198	2.1968	2.16325	2.18977	2.2035	2.19887	2.17698	2.2006	2.20463	2.19043	2.18036	2.22247	2.1716	2.19183	2.194	2.18418	2.17005	2.1648
36.1979		2.18985	2.19762	2.17961	2.17342	2.15675	2.16529	2.19936	2.19413	2.16063	2.18716	2.20082	2.19621	2.17435	2.19785	2.20196	2.18782	2.17771	2.21975	2.16898	2.1892	2.19137	2.18162	2.16748	2.16221
36.6001		2.1872	2.19504	2.17715	2.17079	2.15422	2.16267	2.19676	2.19149	2.15799	2.18459	2.19815	2.19355	2.17173	2.19506	2.1993	2.18523	2.17508	2.21706	2.16637	2.18659	2.18874	2.1791	2.16497	2.15964
37.0023		2.18454	2.19247	2.17475	2.16817	2.15171	2.16006	2.19416	2.18888	2.15536	2.18205	2.19549	2.19087	2.1691	2.19221	2.19666	2.18264	2.17249	2.21438	2.16378	2.184	2.18608	2.17661	2.1625	2.15709
37.4045		2.18187	2.18991	2.17241	2.16556	2.14922	2.15745	2.19159	2.18629	2.15272	2.17954	2.19284	2.18817	2.16647	2.18932	2.19403	2.18007	2.16992	2.21171	2.1612	2.18142	2.18342	2.17416	2.16008	2.15455
37.8067		2.1792	2.18737	2.17011	2.16296	2.14676	2.15485	2.18903	2.18374	2.1501	2.17705	2.19021	2.18548	2.16386	2.18642	2.19143	2.17751	2.16738	2.20906	2.15863	2.17884	2.18076	2.17174	2.1577	2.15203
38.2089		2.17655	2.18485	2.16786	2.16039	2.14432	2.15227	2.18649	2.18122	2.1475	2.17459	2.1876	2.18279	2.16126	2.18353	2.18886	2.17497	2.16486	2.20644	2.1561	2.17629	2.17811	2.16936	2.15535	2.14954
38.6111		2.17394	2.18237	2.16564	2.15785	2.14192	2.14972	2.184	2.17875	2.14494	2.17218	2.18502	2.18014	2.15869	2.18067	2.18634	2.17247	2.16238	2.20385	2.1536	2.17376	2.17549	2.16701	2.15305	2.14709
39.0133		2.17137	2.17994	2.16345	2.15535	2.13955	2.14721	2.18154	2.17632	2.14242	2.1698	2.1825	2.17753	2.15617	2.17788	2.18386	2.17001	2.15994	2.20131	2.15114	2.17126	2.17292	2.1647	2.15078	2.14469
39.4155		2.16887	2.17756	2.16129	2.15291	2.13722	2.14475	2.17914	2.17394	2.13997	2.16747	2.18003	2.17498	2.1537	2.17518	2.18144	2.16761	2.15754	2.19883	2.14874	2.16882	2.17042	2.16244	2.14855	2.14234
39.8177		2.16645	2.17524	2.15914	2.15052	2.13494	2.14235	2.1768	2.17161	2.13759	2.16518	2.17762	2.17252	2.1513	2.17258	2.17909	2.16527	2.1552	2.19641	2.1464	2.16643	2.168	2.16022	2.14635	2.14006
40.2199		2.16411	2.17299	2.15701	2.14821	2.13272	2.14003	2.17452	2.16934	2.13529	2.16295	2.17528	2.17014	2.14898	2.1701	2.17679	2.16301	2.1529	2.19405	2.14412	2.1641	2.16567	2.15804	2.14419	2.13784
40.6221		2.16185	2.17081	2.15489	2.14597	2.13055	2.13778	2.1723	2.16712	2.13306	2.16076	2.17299	2.16785	2.14673	2.16775	2.17456	2.1608	2.15066	2.19176	2.14192	2.16184	2.16342	2.15592	2.14206	2.13569
41.0243		2.15968	2.1687	2.15277	2.14379	2.12844	2.13561	2.17014	2.16495	2.13091	2.15861	2.17076	2.16565	2.14457	2.16551	2.17238	2.15867	2.14847	2.18953	2.13977	2.15965	2.16127	2.15384	2.13996	2.1336
41.4265		2.1576	2.16664	2.15067	2.14169	2.12639	2.13352	2.16802	2.16282	2.12884	2.15651	2.16857	2.16353	2.14248	2.16339	2.17026	2.15659	2.14632	2.18736	2.1377	2.15753	2.1592	2.15181	2.13789	2.13158
41.8287		2.15559	2.16465	2.14858	2.13965	2.1244	2.13151	2.16596	2.16075	2.12685	2.15444	2.16644	2.1615	2.14046	2.16138	2.16819	2.15457	2.14423	2.18524	2.13569	2.15546	2.15721	2.14982	2.13584	2.12963
42.2309		2.15366	2.1627	2.1465	2.13767	2.12247	2.12957	2.16394	2.15871	2.12493	2.15241	2.16434	2.15953	2.13851	2.15947	2.16618	2.15259	2.14218	2.18317	2.13374	2.15344	2.1553	2.14786	2.13382	2.12773
42.6331		2.15181	2.16081	2.14444	2.13575	2.12059	2.12771	2.16195	2.15672	2.12308	2.15041	2.16229	2.15763	2.13662	2.15765	2.16422	2.15067	2.14017	2.18114	2.13185	2.15147	2.15345	2.14594	2.13182	2.12589
43.0353		2.15002	2.15896	2.14242	2.13388	2.11875	2.1259	2.16001	2.15476	2.12129	2.14844	2.16028	2.15578	2.13478	2.1559	2.16231	2.14878	2.13821	2.17915	2.13002	2.14954	2.15166	2.14405	2.12985	2.12411
43.4375		2.14828	2.15715	2.14042	2.13205	2.11695	2.12415	2.15811	2.15284	2.11955	2.14651	2.15832	2.15399	2.13298	2.15421	2.16044	2.14694	2.13629	2.1772	2.12823	2.14765	2.14993	2.14219	2.12789	2.12237
43.8397		2.14659	2.15537	2.13847	2.13026	2.11517	2.12244	2.15624	2.15096	2.11786	2.1446	2.15639	2.15223	2.13122	2.15257	2.15861	2.14513	2.13441	2.17529	2.12649	2.14578	2.14823	2.14035	2.12597	2.12067
44.2419		2.14493	2.15361	2.13655	2.1285	2.11342	2.12075	2.1544	2.1491	2.1162	2.14273	2.1545	2.15051	2.12948	2.15096	2.15681	2.14337	2.13256	2.17341	2.12478	2.14394	2.14656	2.13854	2.12407	2.119
44.6441		2.14328	2.15187	2.13467	2.12676	2.11168	2.11908	2.15259	2.14727	2.11456	2.14089	2.15264	2.14881	2.12776	2.14936	2.15503	2.14163	2.13074	2.17155	2.12309	2.14213	2.14491	2.13676	2.1222	2.11735
45.0463		2.14164	2.15013	2.13283	2.12505	2.10995	2.11742	2.1508	2.14546	2.11292	2.13907	2.1508	2.14713	2.12606	2.14777	2.15326	2.13991	2.12895	2.16973	2.12142	2.14033	2.14327	2.13499	2.12036	2.11572
45.4485		2.14	2.14839	2.13102	2.12334	2.10823	2.11576	2.14903	2.14368	2.11127	2.13728	2.14898	2.14545	2.12437	2.14615	2.15151	2.13821	2.12717	2.16792	2.11975	2.13855	2.14163	2.13325	2.11855	2.11409
45.8507		2.13834	2.14666	2.12923	2.12164	2.10652	2.1141	2.14728	2.14191	2.10962	2.13551	2.14717	2.14378	2.12269	2.14451	2.14976	2.13652	2.12541	2.16612	2.11809	2.13677	2.13998	2.13153	2.11677	2.11246
46.2529		2.13666	2.14492	2.12748	2.11994	2.10482	2.11243	2.14554	2.14015	2.10795	2.13376	2.14537	2.14211	2.12101	2.14284	2.14803	2.13484	2.12365	2.16433	2.11642	2.13501	2.13832	2.12983	2.11502	2.11083
46.6551		2.13498	2.14319	2.12574	2.11824	2.10314	2.11077	2.14381	2.13841	2.10626	2.13204	2.14357	2.14043	2.11934	2.14114	2.1463	2.13316	2.12188	2.16255	2.11474	2.13325	2.13664	2.12814	2.11329	2.1092
47.0573		2.13328	2.14147	2.12402	2.11654	2.10147	2.10911	2.14209	2.13668	2.10457	2.13032	2.14178	2.13876	2.11768	2.13942	2.14458	2.13148	2.12012	2.16077	2.11306	2.13151	2.13497	2.12647	2.1116	2.10757
47.4595		2.13159	2.13978	2.12233	2.11485	2.09983	2.10747	2.14038	2.13497	2.10288	2.12863	2.14001	2.13709	2.11604	2.13771	2.14289	2.12981	2.11836	2.15901	2.11138	2.12978	2.1333	2.12481	2.10994	2.10595
47.8617		2.12992	2.13811	2.12065	2.11318	2.09823	2.10585	2.13868	2.13328	2.10121	2.12696	2.13825	2.13544	2.11443	2.13601	2.14122	2.12816	2.11661	2.15727	2.10971	2.12807	2.13164	2.12318	2.10831	2.10434
48.2638		2.12829	2.13649	2.119	2.11153	2.09666	2.10427	2.13702	2.13161	2.09957	2.12531	2.13652	2.13382	2.11285	2.13435	2.13958	2.12653	2.11488	2.15555	2.10807	2.12639	2.13002	2.12158	2.10672	2.10275
48.666		2.1267	2.1349	2.11736	2.10991	2.09512	2.10273	2.13537	2.12997	2.09799	2.12369	2.13483	2.13225	2.11131	2.13274	2.13798	2.12495	2.11318	2.15387	2.10646	2.12475	2.12844	2.12	2.10516	2.1012
49.0682		2.12516	2.13337	2.11575	2.10833	2.09362	2.10124	2.13377	2.12835	2.09646	2.1221	2.13318	2.13072	2.10981	2.1312	2.13642	2.12341	2.1115	2.15222	2.10489	2.12315	2.12691	2.11846	2.10363	2.09968
49.4704		2.12369	2.13188	2.11416	2.1068	2.09215	2.09979	2.1322	2.12676	2.09499	2.12053	2.13157	2.12924	2.10836	2.12974	2.1349	2.12192	2.10988	2.15061	2.10337	2.12158	2.12544	2.11695	2.10214	2.09821
49.8726		2.12228	2.13043	2.11258	2.10532	2.09072	2.0984	2.13067	2.1252	2.09359	2.11899	2.13	2.12782	2.10696	2.12836	2.13342	2.12047	2.1083	2.14904	2.1019	2.12006	2.12405	2.11547	2.10067	2.09678
50.2748		2.12094	2.12904	2.11102	2.1039	2.08931	2.09705	2.12918	2.12367	2.09226	2.11748	2.12848	2.12645	2.10561	2.12706	2.13198	2.11907	2.10677	2.14751	2.10048	2.11858	2.12272	2.11403	2.09922	2.0954
50.677		2.11966	2.12768	2.10946	2.10253	2.08794	2.09575	2.12773	2.12218	2.09098	2.116	2.12701	2.12513	2.1043	2.12584	2.13058	2.11771	2.10529	2.14602	2.09912	2.11713	2.12146	2.11262	2.09779	2.09408
51.0792		2.11844	2.12636	2.10792	2.10121	2.0866	2.0945	2.12632	2.12071	2.08976	2.11455	2.12557	2.12385	2.10304	2.1247	2.12922	2.11638	2.10386	2.14457	2.0978	2.11571	2.12025	2.11125	2.09637	2.09281
51.4814		2.11728	2.12507	2.10639	2.09995	2.08529	2.09328	2.12495	2.11928	2.08858	2.11313	2.12417	2.12261	2.10182	2.12361	2.12789	2.11509	2.10248	2.14316	2.09652	2.11433	2.1191	2.1099	2.09496	2.09159
51.8836		2.11615	2.12382	2.10487	2.09872	2.08401	2.09209	2.1236	2.11789	2.08743	2.11174	2.1228	2.1214	2.10063	2.12258	2.1266	2.11382	2.10114	2.14179	2.09528	2.11296	2.11799	2.10859	2.09357	2.09043
52.2858		2.11507	2.12259	2.10338	2.09753	2.08277	2.09092	2.12228	2.11652	2.0863	2.11039	2.12146	2.12022	2.09946	2.12157	2.12534	2.11258	2.09982	2.14044	2.09407	2.11162	2.1169	2.1073	2.09218	2.08931
52.688		2.11399	2.12138	2.10192	2.09637	2.08155	2.08977	2.12098	2.11517	2.08517	2.10905	2.12013	2.11904	2.09831	2.12058	2.12411	2.11135	2.09853	2.13912	2.09288	2.11029	2.11582	2.10605	2.09082	2.08822
53.0902		2.11292	2.12017	2.1005	2.09522	2.08035	2.08862	2.11969	2.11384	2.08403	2.10774	2.11882	2.11787	2.09715	2.11955	2.12289	2.11014	2.09724	2.13781	2.09169	2.10898	2.11472	2.10482	2.08948	2.08714
53.4924		2.11182	2.11896	2.09914	2.09407	2.07917	2.08745	2.11839	2.11253	2.08286	2.10644	2.11751	2.11668	2.09597	2.11847	2.12168	2.10893	2.09596	2.1365	2.0905	2.10768	2.1136	2.10361	2.08816	2.08605
53.8946		2.11068	2.11775	2.09785	2.09291	2.07798	2.08626	2.11708	2.11122	2.08164	2.10514	2.11619	2.11545	2.09474	2.1173	2.12047	2.10771	2.09466	2.13519	2.08929	2.10639	2.11242	2.10241	2.08688	2.08494
54.2968		2.10947	2.11651	2.09662	2.09172	2.07679	2.08501	2.11575	2.1099	2.08035	2.10383	2.11485	2.11416	2.09346	2.11601	2.11924	2.10647	2.09334	2.13387	2.08806	2.10509	2.11119	2.10122	2.08564	2.08379
54.699		2.10817	2.11524	2.09545	2.09048	2.07558	2.08371	2.1144	2.10858	2.07899	2.10252	2.11348	2.11281	2.09211	2.11458	2.11798	2.1052	2.09199	2.13252	2.08679	2.10378	2.10988	2.10003	2.08444	2.08257
55.1012		2.10677	2.11393	2.09435	2.0892	2.07434	2.08235	2.11302	2.10723	2.07754	2.1012	2.11208	2.11136	2.09069	2.11298	2.11668	2.10388	2.09062	2.13115	2.08549	2.10245	2.10849	2.09883	2.08327	2.0813
55.5034		2.10527	2.1126	2.09329	2.08787	2.07307	2.08092	2.11162	2.10588	2.07601	2.09988	2.11064	2.10982	2.0892	2.11124	2.11534	2.10251	2.08923	2.12974	2.08414	2.1011	2.10702	2.09762	2.08215	2.07997
55.9056		2.10367	2.11124	2.09227	2.0865	2.07178	2.07944	2.1102	2.10451	2.07441	2.09855	2.10917	2.10819	2.08767	2.10936	2.11396	2.10111	2.08782	2.12831	2.08277	2.09973	2.10548	2.09639	2.08106	2.07858
56.3078		2.10199	2.10985	2.09127	2.08509	2.07047	2.07793	2.10878	2.10314	2.07277	2.09723	2.1077	2.1065	2.08611	2.10739	2.11254	2.09967	2.08641	2.12686	2.08138	2.09834	2.1039	2.09515	2.08	2.07716
56.71		2.10028	2.10847	2.09026	2.08367	2.06916	2.07641	2.10737	2.10178	2.07113	2.09592	2.10622	2.10478	2.08455	2.10537	2.1111	2.09822	2.08501	2.12541	2.07998	2.09695	2.10228	2.0939	2.07897	2.07573
57.1122		2.09857	2.10709	2.08925	2.08225	2.06785	2.07489	2.10598	2.10045	2.06951	2.09464	2.10476	2.10306	2.08301	2.10336	2.10964	2.09678	2.08363	2.12396	2.0786	2.09556	2.10066	2.09264	2.07796	2.07431
57.5144		2.09691	2.10575	2.08821	2.08086	2.06655	2.07342	2.10462	2.09915	2.06794	2.09339	2.10334	2.1014	2.08151	2.10142	2.10819	2.09537	2.08228	2.12253	2.07726	2.0942	2.09908	2.09138	2.07696	2.07292
57.9166		2.09533	2.10444	2.08714	2.07951	2.06528	2.072	2.10331	2.09789	2.06647	2.09218	2.10197	2.09982	2.08008	2.09959	2.10677	2.09401	2.08099	2.12113	2.07598	2.09287	2.09756	2.09015	2.07598	2.07158
58.3188		2.09386	2.1032	2.08605	2.07821	2.06405	2.07065	2.10204	2.09668	2.06509	2.09102	2.10065	2.09836	2.07873	2.0979	2.1054	2.09272	2.07975	2.11979	2.07476	2.0916	2.09612	2.08894	2.075	2.07031
58.721		2.09251	2.10202	2.08494	2.07698	2.06285	2.06939	2.10083	2.09551	2.06383	2.0899	2.0994	2.09703	2.07746	2.09638	2.1041	2.0915	2.07858	2.11851	2.07362	2.09038	2.09478	2.08777	2.07402	2.06913
59.1232		2.0913	2.1009	2.08383	2.07581	2.06171	2.06821	2.09968	2.09439	2.06268	2.08882	2.09822	2.09583	2.07628	2.09503	2.10288	2.09037	2.07747	2.1173	2.07254	2.08923	2.09356	2.08665	2.07304	2.06804
59.5254		2.09022	2.09985	2.08274	2.0747	2.06062	2.06713	2.09858	2.0933	2.06162	2.08778	2.0971	2.09476	2.07519	2.09384	2.10174	2.08932	2.07641	2.11617	2.07153	2.08815	2.09245	2.08558	2.07206	2.06703
59.9276		2.08924	2.09885	2.08167	2.07365	2.05958	2.06613	2.09754	2.09225	2.06065	2.08676	2.09603	2.09379	2.07417	2.09281	2.10069	2.08835	2.07541	2.11512	2.07057	2.08712	2.09144	2.08457	2.07108	2.06611
60.3298		2.08836	2.0979	2.08065	2.07266	2.0586	2.0652	2.09655	2.09123	2.05974	2.08578	2.09501	2.0929	2.07323	2.09189	2.09972	2.08745	2.07444	2.11415	2.06965	2.08615	2.09053	2.08362	2.0701	2.06527
60.732		2.08754	2.09698	2.07967	2.07173	2.05767	2.06435	2.09562	2.09025	2.05887	2.08482	2.09404	2.09207	2.07236	2.09107	2.09883	2.08661	2.07352	2.11326	2.06876	2.08523	2.0897	2.08273	2.06914	2.06449
61.1342		2.08679	2.09609	2.07874	2.07084	2.0568	2.06356	2.09474	2.08929	2.05805	2.08389	2.0931	2.09127	2.07156	2.09032	2.09799	2.08583	2.07261	2.11243	2.06788	2.08433	2.08894	2.0819	2.0682	2.06375
61.5364		2.08607	2.09522	2.07785	2.06999	2.05596	2.06283	2.09391	2.08836	2.05724	2.08298	2.0922	2.09048	2.0708	2.08962	2.09721	2.08508	2.07172	2.11165	2.06702	2.08347	2.08822	2.08112	2.06729	2.06304
61.9386		2.08538	2.09436	2.077	2.06918	2.05517	2.06213	2.09312	2.08746	2.05645	2.08211	2.09131	2.0897	2.07007	2.08894	2.09646	2.08436	2.07085	2.11092	2.06616	2.08262	2.08753	2.08037	2.06641	2.06235
62.3408		2.08471	2.09352	2.07617	2.06838	2.05441	2.06147	2.09236	2.0866	2.05567	2.08126	2.09045	2.08892	2.06937	2.08826	2.09573	2.08366	2.06998	2.1102	2.06531	2.08179	2.08685	2.07965	2.06556	2.06166
62.743		2.08404	2.09269	2.07535	2.06758	2.05366	2.06083	2.09162	2.08575	2.0549	2.08044	2.0896	2.08813	2.06867	2.08757	2.09502	2.08297	2.06911	2.10949	2.06447	2.08098	2.08618	2.07893	2.06473	2.06096
63.1452		2.08338	2.09187	2.07453	2.06678	2.05293	2.0602	2.09089	2.08493	2.05414	2.07963	2.08876	2.08735	2.06796	2.08688	2.0943	2.08228	2.06824	2.10876	2.06364	2.08018	2.0855	2.07821	2.06393	2.06025
63.5474		2.0827	2.09105	2.07371	2.06596	2.05221	2.05957	2.09016	2.08413	2.05339	2.07885	2.08794	2.08656	2.06724	2.08616	2.09358	2.08159	2.06738	2.10801	2.06284	2.07939	2.08482	2.07747	2.06314	2.05953
63.9496		2.08201	2.09024	2.07289	2.06514	2.05148	2.05894	2.08941	2.08335	2.05267	2.07808	2.08712	2.08579	2.0665	2.08545	2.09283	2.08091	2.06653	2.10724	2.06207	2.07862	2.08414	2.07671	2.06236	2.05878
64.3518		2.08129	2.08944	2.07207	2.06431	2.05074	2.0583	2.08865	2.08258	2.05197	2.07732	2.08631	2.08504	2.06576	2.08474	2.09208	2.08022	2.06569	2.10644	2.06133	2.07788	2.08346	2.07594	2.06159	2.05802
64.754		2.08055	2.08864	2.07124	2.06348	2.05	2.05765	2.08788	2.08182	2.0513	2.07657	2.08551	2.08431	2.06502	2.08404	2.09131	2.07954	2.06487	2.10562	2.06063	2.07715	2.0828	2.07514	2.06082	2.05725
65.1562		2.07979	2.08785	2.07041	2.06269	2.04924	2.05699	2.08708	2.08108	2.05068	2.07584	2.08473	2.08362	2.0643	2.08336	2.09053	2.07887	2.06408	2.10478	2.05997	2.07643	2.08215	2.07434	2.06005	2.05647
65.5584		2.07903	2.08709	2.06958	2.06194	2.04849	2.05633	2.08628	2.08035	2.05009	2.07513	2.08397	2.08297	2.0636	2.08272	2.08975	2.0782	2.0633	2.10394	2.05934	2.07573	2.08152	2.07356	2.0593	2.05569
65.9606		2.07827	2.08635	2.06876	2.06125	2.04773	2.05567	2.08547	2.07964	2.04954	2.07442	2.08324	2.08237	2.06293	2.0821	2.08898	2.07754	2.06256	2.1031	2.05873	2.07505	2.0809	2.07279	2.05856	2.05492
66.3628		2.07753	2.08565	2.06795	2.06063	2.04698	2.05501	2.08466	2.07895	2.049	2.07372	2.08253	2.08181	2.06229	2.08152	2.08823	2.07689	2.06184	2.10228	2.05813	2.07437	2.08031	2.07206	2.05784	2.05416
66.765		2.07683	2.08499	2.06716	2.06007	2.04624	2.05437	2.08385	2.07828	2.04848	2.07302	2.08183	2.08128	2.06169	2.08097	2.08752	2.07623	2.06116	2.10147	2.05754	2.07371	2.07972	2.07138	2.05713	2.05344
67.1672		2.07617	2.08437	2.0664	2.05956	2.04552	2.05374	2.08305	2.07763	2.04796	2.07232	2.08117	2.08079	2.06113	2.08046	2.08686	2.07558	2.0605	2.10069	2.05694	2.07307	2.07914	2.07073	2.05645	2.05276
67.5694		2.07557	2.08378	2.06566	2.05908	2.04484	2.05312	2.08226	2.077	2.04743	2.07162	2.08051	2.08031	2.06059	2.07999	2.08624	2.07493	2.05987	2.09994	2.05635	2.07244	2.07857	2.07013	2.05578	2.05213
67.9716		2.07504	2.08322	2.06496	2.05862	2.0442	2.05253	2.08149	2.07639	2.04689	2.07092	2.07988	2.07985	2.06008	2.07956	2.08569	2.07428	2.05926	2.09924	2.05577	2.07184	2.07801	2.06955	2.05513	2.05156
68.3738		2.07456	2.08266	2.06431	2.05816	2.04361	2.05194	2.08075	2.07579	2.04635	2.07022	2.07927	2.07939	2.05959	2.07917	2.08518	2.07364	2.05868	2.09859	2.05521	2.07125	2.07746	2.069	2.05449	2.05106
68.776		2.07414	2.08211	2.06369	2.05768	2.04305	2.05137	2.08005	2.07519	2.0458	2.06953	2.07867	2.07891	2.05912	2.07883	2.08474	2.073	2.05812	2.09799	2.05469	2.07068	2.07692	2.06846	2.05385	2.05061
69.1782		2.07376	2.08154	2.06311	2.05718	2.04254	2.05079	2.0794	2.07459	2.04527	2.06886	2.0781	2.07842	2.05865	2.07853	2.08432	2.07238	2.05757	2.09743	2.0542	2.07012	2.0764	2.06792	2.05321	2.05021
69.5804		2.0734	2.08096	2.06255	2.05666	2.04204	2.05021	2.07879	2.07398	2.04475	2.06821	2.07754	2.07791	2.05819	2.07826	2.08393	2.07176	2.05702	2.09692	2.05375	2.06957	2.07589	2.06738	2.05257	2.04984
69.9826		2.07305	2.08039	2.062	2.05611	2.04157	2.04962	2.07823	2.07337	2.04425	2.06759	2.07701	2.07738	2.05771	2.07799	2.08354	2.07116	2.05648	2.09644	2.05332	2.06902	2.07539	2.06683	2.05194	2.04948
70.3848		2.07269	2.07982	2.06144	2.05557	2.04109	2.04902	2.07771	2.07277	2.04376	2.06699	2.07649	2.07683	2.05722	2.0777	2.08311	2.07057	2.05592	2.09598	2.05292	2.06848	2.07491	2.06626	2.0513	2.04913
70.787		2.07232	2.07929	2.06086	2.05503	2.0406	2.04842	2.07722	2.07219	2.04329	2.06641	2.07598	2.07628	2.0567	2.07737	2.08265	2.06999	2.05537	2.09553	2.05252	2.06794	2.07443	2.06569	2.05068	2.04878
71.1892		2.07193	2.07879	2.06025	2.0545	2.04011	2.04783	2.07675	2.07164	2.04282	2.06585	2.07547	2.07572	2.05615	2.07697	2.08213	2.06942	2.05481	2.0951	2.05211	2.06741	2.07397	2.0651	2.05007	2.0484
71.5914		2.07152	2.07832	2.05962	2.05399	2.0396	2.04727	2.07627	2.07114	2.04236	2.06529	2.07495	2.07518	2.05556	2.0765	2.08156	2.06886	2.05426	2.09468	2.05169	2.0669	2.07351	2.0645	2.04947	2.04802
71.9936		2.07109	2.07789	2.05898	2.05349	2.03909	2.04675	2.07579	2.07068	2.04189	2.06474	2.0744	2.07464	2.05494	2.07595	2.08094	2.06832	2.05372	2.09425	2.05124	2.0664	2.07306	2.0639	2.0489	2.04761
72.3958		2.07066	2.07747	2.05832	2.05299	2.03858	2.04628	2.0753	2.07026	2.04142	2.06418	2.07382	2.07412	2.05428	2.07532	2.08028	2.06781	2.05318	2.09382	2.05076	2.06593	2.07261	2.06331	2.04835	2.04717
72.798		2.07021	2.07704	2.05768	2.05246	2.03808	2.04585	2.0748	2.06987	2.04093	2.06362	2.0732	2.07362	2.05359	2.07462	2.07961	2.06732	2.05265	2.09337	2.05025	2.06545	2.07215	2.06274	2.04782	2.04671
73.2002		2.06974	2.0766	2.05707	2.05189	2.03759	2.04548	2.0743	2.06949	2.04044	2.06306	2.07253	2.07314	2.05287	2.07387	2.07893	2.06687	2.05212	2.09289	2.04971	2.06498	2.07168	2.06218	2.04732	2.04621
73.6024		2.06925	2.07612	2.05649	2.05128	2.03711	2.04513	2.07382	2.0691	2.03995	2.06248	2.07182	2.07266	2.05214	2.07307	2.07826	2.06644	2.05157	2.09237	2.04914	2.06447	2.07119	2.06164	2.04684	2.04566
74.0046		2.06874	2.07562	2.05596	2.05063	2.03663	2.04481	2.07335	2.06868	2.03946	2.06191	2.07109	2.07219	2.05141	2.07223	2.0776	2.06605	2.05102	2.09181	2.04855	2.06394	2.07066	2.06113	2.0464	2.04505
74.4068		2.06821	2.07511	2.05547	2.04996	2.03615	2.0445	2.07291	2.06822	2.03897	2.06133	2.07035	2.07172	2.0507	2.07135	2.07697	2.06568	2.05046	2.09119	2.04794	2.06338	2.07011	2.06063	2.04599	2.04439
74.809		2.06765	2.07459	2.055	2.04929	2.03567	2.04419	2.0725	2.06773	2.03849	2.06076	2.06962	2.07125	2.05004	2.07045	2.07636	2.06532	2.0499	2.09054	2.04733	2.06278	2.06953	2.06015	2.04562	2.04369
75.2112		2.06709	2.0741	2.05456	2.04864	2.03517	2.04387	2.07211	2.0672	2.038	2.06021	2.06893	2.07077	2.04944	2.06955	2.07578	2.06496	2.04935	2.08986	2.04673	2.06217	2.06895	2.05971	2.0453	2.04295
75.6134		2.06653	2.07364	2.05412	2.04803	2.03465	2.04354	2.07174	2.06665	2.0375	2.05968	2.06828	2.07028	2.04892	2.06868	2.07523	2.06458	2.04882	2.08917	2.04617	2.06155	2.06838	2.0593	2.04502	2.04221
76.0156		2.06598	2.07322	2.05367	2.04749	2.03412	2.04319	2.07141	2.06611	2.03698	2.05917	2.0677	2.06979	2.04849	2.06785	2.0747	2.06418	2.04833	2.08851	2.04566	2.06096	2.06785	2.05895	2.04477	2.04149
76.4178		2.06544	2.07284	2.05321	2.047	2.03358	2.04283	2.0711	2.06558	2.03645	2.0587	2.06717	2.06929	2.04814	2.06709	2.0742	2.06374	2.04788	2.08789	2.04519	2.0604	2.06738	2.05866	2.04454	2.04081
76.82		2.06492	2.07248	2.05274	2.04656	2.03305	2.04244	2.07082	2.06508	2.03588	2.05828	2.0667	2.06879	2.04786	2.06643	2.0737	2.06328	2.04748	2.08733	2.04477	2.05989	2.06698	2.05843	2.04431	2.04019
77.2222		2.06439	2.07214	2.05226	2.04616	2.03254	2.04202	2.07057	2.06461	2.0353	2.05789	2.06625	2.06828	2.04762	2.06586	2.07322	2.0628	2.04711	2.08682	2.04438	2.05945	2.06664	2.05825	2.04406	2.03963
77.6244		2.06385	2.07177	2.0518	2.04577	2.03208	2.04156	2.07034	2.06415	2.03471	2.05754	2.06581	2.06777	2.0474	2.06539	2.07273	2.0623	2.04677	2.08636	2.044	2.05906	2.06637	2.0581	2.04377	2.03915
78.0266		2.06328	2.07138	2.05136	2.04539	2.03168	2.04105	2.07011	2.06369	2.03414	2.05723	2.06537	2.06725	2.04717	2.06499	2.07224	2.06182	2.04644	2.08594	2.04363	2.05874	2.06614	2.05795	2.04343	2.03871
78.4288		2.06267	2.07094	2.05095	2.045	2.03135	2.04049	2.06985	2.06322	2.03359	2.05694	2.06493	2.0667	2.04691	2.06464	2.07173	2.06137	2.04613	2.08555	2.04325	2.05849	2.06592	2.05777	2.04303	2.03832
78.831		2.06203	2.07046	2.05059	2.0446	2.03108	2.03988	2.06955	2.06273	2.03307	2.05665	2.06449	2.06614	2.0466	2.06431	2.07121	2.06095	2.04583	2.08516	2.04286	2.05829	2.06568	2.05755	2.04259	2.03795
79.2332		2.06138	2.06995	2.05024	2.04419	2.03086	2.03922	2.06917	2.06221	2.0326	2.05635	2.06409	2.06556	2.04623	2.06399	2.07069	2.06059	2.04555	2.08478	2.04247	2.05813	2.06537	2.05725	2.04211	2.03757
79.6354		2.06075	2.06945	2.04991	2.04379	2.03067	2.03851	2.06869	2.06167	2.03216	2.05602	2.06373	2.06499	2.04579	2.06366	2.07016	2.06028	2.04531	2.08441	2.04207	2.05802	2.06499	2.0569	2.04162	2.03719
80.0376		2.06015	2.06897	2.04955	2.0434	2.03048	2.03777	2.0681	2.06109	2.03174	2.05564	2.06345	2.06445	2.0453	2.06331	2.06964	2.06001	2.0451	2.08405	2.04168	2.05791	2.06452	2.05648	2.04113	2.0368
80.4398		2.05964	2.06855	2.04915	2.04301	2.03025	2.03701	2.06743	2.0605	2.03132	2.05518	2.06323	2.06397	2.04478	2.06295	2.06916	2.05978	2.04495	2.0837	2.04129	2.05781	2.06398	2.05604	2.04066	2.03638
80.842		2.05923	2.06818	2.04869	2.04263	2.02996	2.03626	2.06668	2.0599	2.03088	2.05463	2.06307	2.06356	2.04425	2.06258	2.06872	2.05957	2.04484	2.08338	2.04089	2.05767	2.0634	2.0556	2.04021	2.03596
81.2442		2.05892	2.06786	2.04818	2.04225	2.02958	2.03555	2.06589	2.05929	2.03043	2.05402	2.06293	2.06324	2.04375	2.06222	2.06836	2.05936	2.04476	2.08309	2.04048	2.05749	2.06282	2.05517	2.03978	2.03554
81.6464		2.05873	2.06756	2.04762	2.04186	2.02911	2.0349	2.0651	2.05871	2.02997	2.05334	2.06275	2.06301	2.04332	2.06187	2.06808	2.05914	2.04468	2.08284	2.04005	2.05724	2.06228	2.05476	2.03936	2.03513
82.0485		2.05864	2.06721	2.04705	2.04145	2.02857	2.03433	2.06436	2.05817	2.02953	2.05264	2.0625	2.06286	2.04297	2.06155	2.0679	2.0589	2.04455	2.08263	2.03958	2.05691	2.06182	2.05438	2.03894	2.03474
82.4507		2.0586	2.06679	2.04652	2.04101	2.02795	2.03383	2.06369	2.05769	2.02914	2.05194	2.06213	2.06277	2.04272	2.06128	2.0678	2.05863	2.04435	2.08244	2.03908	2.05649	2.06145	2.05402	2.03851	2.03439
82.8529		2.05859	2.06625	2.04604	2.04055	2.0273	2.03339	2.06312	2.0573	2.02883	2.05129	2.06162	2.06271	2.04258	2.06105	2.06777	2.05833	2.04404	2.08226	2.03857	2.05597	2.06117	2.05364	2.03806	2.03406
83.2551		2.05857	2.06558	2.04564	2.04007	2.02662	2.03299	2.06265	2.05699	2.0286	2.0507	2.06099	2.0627	2.04251	2.06088	2.06777	2.05801	2.04359	2.08205	2.03805	2.05535	2.06094	2.05323	2.03759	2.03376
83.6573		2.05851	2.06479	2.04533	2.0396	2.02593	2.03259	2.0623	2.05677	2.02845	2.05021	2.06028	2.0627	2.04248	2.06077	2.06774	2.05768	2.043	2.08178	2.03756	2.05466	2.06072	2.05277	2.03709	2.03348
84.0595		2.05838	2.06395	2.04506	2.03916	2.02526	2.03217	2.06205	2.0566	2.02833	2.04979	2.05953	2.06274	2.04242	2.06069	2.06766	2.05735	2.04228	2.08141	2.0371	2.05391	2.06049	2.05226	2.03656	2.03321
84.4617		2.05817	2.06309	2.04482	2.03875	2.02461	2.03171	2.06189	2.05645	2.02821	2.04944	2.05881	2.06279	2.04229	2.06063	2.06748	2.05702	2.04146	2.08094	2.03668	2.05314	2.06021	2.05169	2.03602	2.03292
84.8639		2.05789	2.06229	2.04455	2.03839	2.024	2.03122	2.06181	2.05626	2.02804	2.04912	2.05816	2.06286	2.04204	2.06056	2.06718	2.05669	2.04056	2.08034	2.03632	2.05238	2.05988	2.05107	2.03548	2.03261
85.2661		2.05754	2.06161	2.04424	2.03806	2.02344	2.03071	2.06181	2.05598	2.02779	2.04877	2.05761	2.06291	2.04164	2.06045	2.06679	2.05638	2.03964	2.07964	2.036	2.05169	2.05948	2.05042	2.03495	2.03228
85.6683		2.05713	2.06105	2.04388	2.03776	2.02291	2.0302	2.06187	2.0556	2.02743	2.04836	2.05717	2.06292	2.04106	2.06028	2.0663	2.05606	2.03874	2.07886	2.03571	2.0511	2.05904	2.04976	2.03447	2.03193
86.0705		2.05667	2.06064	2.04347	2.03744	2.02242	2.02972	2.06199	2.05509	2.02696	2.04784	2.05682	2.06285	2.04034	2.06005	2.06576	2.05572	2.03789	2.07804	2.03544	2.05061	2.05855	2.04909	2.03403	2.03156
86.4727		2.05616	2.06033	2.04306	2.03708	2.02196	2.02927	2.06212	2.0545	2.02641	2.0472	2.05651	2.06266	2.03947	2.05973	2.06517	2.05535	2.03711	2.07723	2.03517	2.05024	2.05802	2.04841	2.03364	2.03119
86.8749		2.05558	2.06011	2.0427	2.03663	2.0215	2.02885	2.06222	2.05387	2.0258	2.04645	2.05617	2.06229	2.03848	2.05932	2.06456	2.05492	2.03639	2.07646	2.03488	2.04992	2.05744	2.04772	2.03328	2.03081
87.2771		2.05491	2.05993	2.04241	2.03608	2.02103	2.02845	2.06223	2.05326	2.02516	2.0456	2.05573	2.06173	2.0374	2.05882	2.06393	2.05441	2.03574	2.07576	2.03456	2.04962	2.0568	2.04703	2.03287	2.03043
87.6793		2.05414	2.05976	2.0422	2.03539	2.02055	2.02806	2.06209	2.05272	2.0245	2.04472	2.05513	2.06096	2.03625	2.05819	2.06327	2.05383	2.03513	2.07512	2.03418	2.04925	2.0561	2.04632	2.03237	2.03002
88.0815		2.05325	2.05959	2.04205	2.0346	2.02007	2.02768	2.06173	2.05228	2.02384	2.04389	2.05431	2.05996	2.03504	2.05743	2.06255	2.05318	2.03456	2.07457	2.03373	2.04876	2.05532	2.04564	2.0317	2.02957
88.4837		2.05224	2.05941	2.04191	2.03373	2.01959	2.02731	2.06114	2.05194	2.02318	2.04319	2.05324	2.05877	2.03382	2.0565	2.06178	2.05248	2.03404	2.07409	2.0332	2.0481	2.0545	2.04498	2.03082	2.02905
88.8859		2.05113	2.05922	2.04169	2.03283	2.01914	2.02696	2.06036	2.05169	2.02252	2.04269	2.05194	2.05743	2.03259	2.05539	2.06093	2.05174	2.03358	2.0737	2.03259	2.04727	2.05365	2.04439	2.02973	2.02843
89.2881		2.04993	2.05902	2.04131	2.03197	2.01872	2.02664	2.05946	2.05146	2.02185	2.04242	2.05045	2.05598	2.03142	2.0541	2.06002	2.05099	2.03318	2.0734	2.03191	2.04629	2.05283	2.04386	2.02848	2.02771
89.6903		2.04868	2.0588	2.04072	2.03121	2.01833	2.02633	2.05854	2.05122	2.02117	2.04237	2.04884	2.05451	2.03034	2.05265	2.05905	2.05025	2.03284	2.07319	2.03116	2.04523	2.05208	2.0434	2.02714	2.02689
90.0925		2.04739	2.05852	2.03991	2.03059	2.01795	2.02602	2.05769	2.05092	2.02047	2.04247	2.04722	2.0531	2.02938	2.05108	2.05804	2.04951	2.03256	2.07306	2.03037	2.04415	2.05142	2.04297	2.02582	2.02599
90.4947		2.04607	2.05818	2.0389	2.03015	2.01755	2.02564	2.05697	2.05051	2.01972	2.0426	2.04567	2.05182	2.02857	2.04943	2.05702	2.04878	2.03228	2.07295	2.02956	2.04308	2.05087	2.04251	2.02461	2.02504
90.8969		2.04473	2.05774	2.03777	2.02986	2.01711	2.02514	2.05638	2.04998	2.01891	2.04264	2.04426	2.05072	2.02789	2.04776	2.05599	2.04803	2.03195	2.0728	2.02877	2.04205	2.05041	2.04196	2.02356	2.02407
91.2991		2.04336	2.0572	2.03662	2.02965	2.0166	2.02446	2.05583	2.04933	2.018	2.04243	2.04306	2.04983	2.02729	2.0461	2.05497	2.04721	2.03149	2.07254	2.02801	2.04102	2.04997	2.04125	2.0227	2.02311
91.7013		2.04196	2.05657	2.03556	2.0294	2.01603	2.02359	2.05521	2.04855	2.01698	2.04189	2.04204	2.04915	2.0267	2.0445	2.05396	2.04631	2.03087	2.07207	2.0273	2.03993	2.0495	2.04036	2.02198	2.02217
92.1035		2.04054	2.05586	2.03466	2.029	2.01539	2.02254	2.05438	2.04767	2.01582	2.04098	2.04117	2.04861	2.02603	2.04298	2.05294	2.04529	2.03005	2.07133	2.02663	2.03871	2.04889	2.03932	2.02134	2.02125
92.5057		2.03914	2.0551	2.03396	2.02832	2.01472	2.02137	2.05322	2.04669	2.01455	2.03972	2.04041	2.04816	2.0252	2.04156	2.0519	2.04414	2.02905	2.07028	2.02598	2.03729	2.04808	2.03818	2.02068	2.02032
92.9079		2.03781	2.05432	2.03345	2.02727	2.014	2.02017	2.05168	2.04563	2.01318	2.0382	2.03968	2.0477	2.02416	2.04027	2.05082	2.04287	2.02791	2.06888	2.02532	2.03565	2.04703	2.03703	2.01995	2.01938
93.3101		2.03661	2.05351	2.03308	2.02582	2.01323	2.01902	2.04981	2.04453	2.01176	2.03655	2.03896	2.04715	2.02293	2.03913	2.04972	2.04151	2.02667	2.06715	2.02461	2.03381	2.04574	2.03598	2.01913	2.01841
93.7123		2.03562	2.05268	2.03275	2.02401	2.01237	2.01801	2.04772	2.04341	2.01036	2.03491	2.03825	2.04643	2.02155	2.03818	2.04862	2.04009	2.0254	2.06512	2.02378	2.03187	2.04426	2.03508	2.01827	2.01741
94.1145		2.03486	2.05178	2.03238	2.02194	2.01138	2.01716	2.04562	2.04232	2.00903	2.03342	2.03758	2.04553	2.02012	2.03746	2.04757	2.03866	2.02414	2.06289	2.02282	2.02997	2.0427	2.03437	2.01747	2.01644
94.5167		2.03433	2.05076	2.0319	2.01977	2.01024	2.01648	2.04374	2.0413	2.00785	2.03221	2.03696	2.04446	2.01878	2.03703	2.04661	2.03729	2.02291	2.06055	2.0217	2.02824	2.04118	2.03383	2.01687	2.01552
94.9189		2.034	2.04959	2.03125	2.01764	2.00896	2.01593	2.04227	2.04038	2.0069	2.03138	2.03644	2.04329	2.01765	2.03691	2.04583	2.03607	2.02172	2.05829	2.02047	2.02683	2.03981	2.0334	2.01661	2.01474
95.3211		2.03379	2.04824	2.03047	2.01572	2.00761	2.01548	2.0414	2.03959	2.00623	2.03098	2.03599	2.04213	2.01685	2.03713	2.04528	2.03505	2.02056	2.0563	2.01921	2.02582	2.03869	2.03303	2.0168	2.01414
95.7233		2.03365	2.04674	2.02957	2.01415	2.0063	2.01511	2.04117	2.03893	2.0059	2.03102	2.03557	2.04108	2.01647	2.03765	2.04499	2.03432	2.0194	2.0548	2.01802	2.02522	2.03785	2.03264	2.01746	2.01377
96.1255		2.03349	2.04515	2.02862	2.01304	2.00517	2.01482	2.04156	2.03835	2.0059	2.03146	2.03515	2.04025	2.01652	2.03842	2.04497	2.03392	2.01823	2.05397	2.01702	2.02499	2.03728	2.03222	2.0185	2.01358
96.5277		2.03327	2.04356	2.02764	2.01246	2.0043	2.01467	2.0424	2.03779	2.00618	2.03219	2.03469	2.03967	2.01698	2.03931	2.04517	2.03385	2.01702	2.0539	2.0163	2.02497	2.0369	2.03178	2.01972	2.01352
96.9299		2.03299	2.04207	2.02665	2.01242	2.00376	2.01472	2.04347	2.03716	2.00663	2.03306	2.03421	2.03928	2.01778	2.04017	2.04547	2.03406	2.01577	2.05451	2.0159	2.02502	2.03662	2.03135	2.02088	2.01344
97.3321		2.03265	2.04075	2.0256	2.0129	2.00355	2.01506	2.04451	2.03639	2.00709	2.03388	2.03376	2.03893	2.01881	2.04086	2.04571	2.03443	2.01452	2.05555	2.01578	2.02498	2.03633	2.03098	2.02169	2.01319
97.7343		2.03228	2.03965	2.02443	2.01378	2.00359	2.0157	2.04528	2.03544	2.0074	2.03448	2.03345	2.03844	2.01992	2.04124	2.0457	2.03477	2.01331	2.05666	2.01581	2.02474	2.03593	2.03065	2.02194	2.01262
98.1365		2.03189	2.03873	2.02311	2.01492	2.00382	2.01663	2.04561	2.03431	2.00744	2.03469	2.03334	2.03766	2.02096	2.0412	2.04526	2.03489	2.01224	2.0574	2.01584	2.02426	2.03536	2.03035	2.02148	2.01163
98.5387		2.03151	2.03791	2.02161	2.01611	2.00417	2.01776	2.04544	2.03307	2.00718	2.03443	2.03345	2.03652	2.02179	2.04071	2.04428	2.03459	2.01142	2.05742	2.01565	2.02357	2.03458	2.03001	2.02032	2.01019
98.9409		2.03112	2.0371	2.01998	2.01718	2.00461	2.01887	2.04481	2.03184	2.00666	2.03367	2.03371	2.03507	2.02228	2.03979	2.04273	2.03379	2.01097	2.05647	2.01508	2.02281	2.03358	2.02955	2.01852	2.00837
99.3431		2.03068	2.03624	2.01832	2.01796	2.00513	2.01973	2.04379	2.03076	2.00599	2.03245	2.03388	2.0335	2.02232	2.0385	2.04074	2.03247	2.01097	2.05452	2.01399	2.0221	2.03235	2.02892	2.01626	2.00634
99.7453		2.03014	2.0353	2.01672	2.01841	2.00572	2.02008	2.04253	2.02993	2.00528	2.03086	2.03369	2.03202	2.02184	2.03693	2.03853	2.03075	2.01147	2.05165	2.01233	2.02155	2.03092	2.02811	2.01372	2.00429
100.147		2.02946	2.03436	2.01529	2.01857	2.00634	2.01972	2.0411	2.0294	2.00456	2.02903	2.03282	2.03086	2.02081	2.03515	2.03642	2.02884	2.0124	2.04807	2.01013	2.02123	2.02933	2.02716	2.01111	2.00247
100.55		2.02861	2.03349	2.01402	2.01856	2.0069	2.01854	2.03958	2.02911	2.0038	2.02711	2.03103	2.03013	2.01926	2.03323	2.03475	2.027	2.01367	2.04403	2.00747	2.02111	2.02763	2.02614	2.00864	2.00109
100.952		2.0276	2.0328	2.01285	2.01854	2.00726	2.0166	2.03795	2.02888	2.00283	2.02526	2.02826	2.02983	2.01731	2.03118	2.03383	2.02548	2.01508	2.03984	2.0045	2.02104	2.02592	2.02509	2.00647	2.0003
101.354		2.02648	2.03231	2.01164	2.01864	2.00731	2.01414	2.03617	2.02844	2.00149	2.02369	2.02464	2.02977	2.01513	2.02903	2.03385	2.02446	2.01644	2.03581	2.00138	2.02084	2.02436	2.02403	2.00474	2.00015
101.756		2.02534	2.03197	2.0103	2.01893	2.00698	2.01153	2.03416	2.02753	1.99963	2.02257	2.02048	2.02975	2.01298	2.02677	2.0348	2.024	2.01758	2.0323	1.99831	2.02033	2.0231	2.02289	2.00353	2.0006
102.158		2.02432	2.03164	2.0088	2.01937	2.0063	2.00924	2.03188	2.02594	1.99723	2.02204	2.01625	2.02954	2.01111	2.02452	2.03645	2.02399	2.01836	2.0297	1.99548	2.01943	2.02231	2.02157	2.0029	2.0015
102.561		2.02351	2.03113	2.00723	2.01983	2.00541	2.00771	2.02934	2.02359	1.99442	2.0222	2.0125	2.02908	2.00979	2.02242	2.03839	2.02424	2.01867	2.02838	1.99311	2.01814	2.02214	2.01997	2.00282	2.00258
102.963		2.02302	2.03035	2.00584	2.02012	2.00452	2.00727	2.0266	2.02061	1.99147	2.02301	2.00977	2.02842	2.00919	2.02074	2.04014	2.02447	2.01847	2.02863	1.9914	2.01662	2.02266	2.01802	2.0032	2.00357
103.365		2.02284	2.02926	2.00487	2.02007	2.00384	2.00798	2.02377	2.01728	1.9887	2.02427	2.00845	2.02776	2.00937	2.01976	2.04121	2.02444	2.01774	2.03057	1.99059	2.01505	2.02384	2.01574	2.00389	2.00421
103.767		2.02288	2.02797	2.00452	2.01958	2.00357	2.00962	2.021	2.01397	1.98639	2.02568	2.00875	2.02734	2.01029	2.01975	2.04131	2.02403	2.01647	2.034	1.99083	2.01361	2.02545	2.01325	2.00473	2.00427
104.169		2.02302	2.02662	2.00485	2.01858	2.00373	2.01164	2.01845	2.01106	1.98472	2.0268	2.01055	2.02733	2.0118	2.02081	2.04029	2.02323	2.01471	2.03845	1.99218	2.01234	2.02714	2.01075	2.00551	2.00371
104.572		2.02308	2.02538	2.00569	2.0171	2.00425	2.0134	2.01619	2.00884	1.98374	2.02722	2.01344	2.02781	2.01368	2.02282	2.0383	2.02216	2.01258	2.04317	1.99456	2.01119	2.02841	2.00847	2.00605	2.00262
104.974		2.02291	2.0243	2.00675	2.01515	2.00489	2.01431	2.01423	2.00737	1.98335	2.02661	2.01677	2.02871	2.01578	2.02538	2.03567	2.02097	2.01023	2.0474	1.99763	2.01001	2.02877	2.00664	2.00621	2.00124
105.376		2.02241	2.02335	2.00772	2.01276	2.00539	2.01404	2.01247	2.00649	1.98337	2.02484	2.01988	2.02985	2.01796	2.02789	2.03291	2.01981	2.00795	2.05056	2.00088	2.00864	2.02782	2.0054	2.00586	1.99995
105.778		2.0216	2.02244	2.00849	2.00994	2.00546	2.01258	2.01073	2.00582	1.98366	2.02196	2.02226	2.031	2.02011	2.02969	2.03063	2.01878	2.00606	2.05243	2.00367	2.00707	2.02537	2.00478	2.00492	1.99915
106.18		2.02054	2.02144	2.00917	2.00674	2.00492	2.01021	2.00879	2.0049	1.98409	2.01825	2.0237	2.03199	2.02214	2.0303	2.02948	2.01789	2.00488	2.05312	2.00543	2.0055	2.02153	2.00469	2.00334	1.99922
106.583		2.01941	2.0203	2.01013	2.00327	2.00359	2.00738	2.00652	2.00335	1.98463	2.01414	2.02428	2.0327	2.02391	2.02954	2.03001	2.01709	2.00466	2.05302	2.00578	2.00432	2.01663	2.00495	2.00106	2.00035
106.985		2.01842	2.01908	2.01188	1.99976	2.00141	2.00464	2.00391	2.001	1.98532	2.01016	2.0244	2.03305	2.02525	2.02756	2.03258	2.01632	2.00543	2.0526	2.00466	2.00407	2.01124	2.00534	1.99807	2.0025
107.387		2.01785	2.0179	2.01477	1.99658	1.99833	2.00245	2.0011	1.99803	1.98624	2.00685	2.02455	2.03303	2.02595	2.02478	2.03721	2.01553	2.00691	2.05224	2.00226	2.00525	2.00608	2.0056	1.99435	2.00536
107.789		2.01792	2.01694	2.01885	1.99419	1.99429	2.00119	1.99838	1.99486	1.98745	2.00466	2.02528	2.03258	2.02589	2.02174	2.0435	2.0148	2.00849	2.05212	1.99901	2.00804	2.00185	2.00553	1.98995	2.00831
108.191		2.0188	2.01634	2.02365	1.99308	1.98933	2.00108	1.99608	1.99215	1.98899	2.00386	2.02692	2.03159	2.02511	2.0189	2.05061	2.01427	2.00932	2.05214	1.99539	2.01222	1.99917	2.00499	1.98493	2.01064
108.594		2.02049	2.01625	2.02825	1.99369	1.98352	2.00214	1.99447	1.99059	1.99085	2.0044	2.0295	2.02995	2.02378	2.0166	2.05739	2.01417	2.0086	2.05199	1.99188	2.01698	1.99838	2.00389	1.97947	2.01171
108.996		2.02275	2.01675	2.03158	1.9962	1.9771	2.00427	1.99368	1.99082	1.99291	2.00596	2.03258	2.02764	2.02221	2.01488	2.06264	2.01476	2.00585	2.05128	1.98888	2.02124	1.99946	2.0022	1.97387	2.01118
109.398		2.02515	2.01793	2.03275	2.00046	1.97043	2.00727	1.99359	1.99322	1.99495	2.00799	2.0354	2.02474	2.02077	2.01366	2.06542	2.01621	2.00112	2.0497	1.98669	2.02392	2.00187	1.9999	1.96854	2.00906
109.8		2.02714	2.01987	2.0314	2.00592	1.96405	2.01085	1.99393	1.99779	1.99665	2.00992	2.03707	2.02153	2.01974	2.01272	2.06527	2.01846	1.99493	2.04715	1.98548	2.02437	2.0047	1.99692	1.96402	2.00567
110.202		2.02822	2.02267	2.02768	2.01172	1.95861	2.0148	1.99439	2.00409	1.99764	2.01128	2.0369	2.01844	2.01929	2.01187	2.06231	2.02115	1.98818	2.04384	1.98536	2.02248	2.0068	1.9932	1.96091	2.00152
110.605		2.02803	2.02633	2.02219	2.01679	1.95477	2.01892	1.99479	2.0113	1.99761	2.01177	2.03461	2.01601	2.01936	2.0111	2.05711	2.02357	1.98194	2.04015	1.98621	2.01875	2.00713	1.98864	1.95974	1.99718
111.007		2.0265	2.03064	2.01568	2.02021	1.95308	2.02305	1.99526	2.01838	1.9964	2.01117	2.03034	2.01472	2.01967	2.01059	2.05061	2.02486	1.9773	2.03654	1.98772	2.01396	2.00505	1.98326	1.96076	1.99312
111.409		2.02387	2.03514	2.00897	2.02141	1.95377	2.02709	1.9962	2.02425	1.99408	2.00934	2.02458	2.01484	2.01984	2.01067	2.04381	2.0242	1.97518	2.03336	1.98929	2.00912	2.00041	1.97719	1.9638	1.98965
111.811		2.02054	2.03907	2.00269	2.02032	1.95657	2.03089	1.99821	2.02815	1.99106	2.00606	2.01798	2.01621	2.01941	2.01182	2.03764	2.02115	1.97616	2.03068	1.99017	2.0052	1.99356	1.9708	1.96806	1.98682
112.213		2.01713	2.04161	1.99737	2.01741	1.96062	2.0342	2.00183	2.02957	1.98793	2.00109	2.01123	2.01819	2.01805	2.01446	2.03271	2.01565	1.98027	2.02834	1.98965	2.00295	1.98521	1.96467	1.97226	1.98451
112.616		2.01416	2.04207	1.99331	2.0135	1.96454	2.03668	2.00724	2.02839	1.98541	1.99422	2.00492	2.01976	2.01553	2.01877	2.02915	2.00813	1.98682	2.02582	1.98736	2.00264	1.97619	1.95951	1.97509	1.98237
113.018		2.01201	2.04012	1.99066	2.00954	1.96682	2.03777	2.01402	2.02484	1.98402	1.98551	1.99942	2.01982	2.01184	2.02453	2.02663	1.99925	1.99448	2.02254	1.98341	2.00401	1.96727	1.95599	1.97567	1.97999
113.42		2.01082	2.03586	1.98929	2.00643	1.96626	2.03698	2.02113	2.01947	1.984	1.97526	1.99481	2.01769	2.00711	2.03095	2.02446	1.98976	2.00161	2.01793	1.97838	2.00629	1.95898	1.95446	1.97386	1.97708
113.822		2.01044	2.02968	1.98881	2.00454	1.9623	2.03388	2.02716	2.01297	1.98497	1.96424	1.99087	2.0133	2.00154	2.03679	2.02199	1.98027	2.00691	2.0116	1.97312	2.0085	1.95151	1.95473	1.97022	1.97351
114.224		2.01065	2.02225	1.98867	2.0038	1.955	2.02838	2.03088	2.00625	1.98602	1.95361	1.98724	2.00718	1.9954	2.04063	2.01883	1.97119	2.00987	2.00339	1.96857	2.0098	1.94472	1.95617	1.96578	1.96941
114.627		2.01109	2.01444	1.98815	2.00361	1.94503	2.02073	2.03155	2.00012	1.98585	1.94502	1.98347	2.0004	1.98902	2.04142	2.01509	1.96258	2.01081	1.99338	1.96554	2.0097	1.93821	1.95785	1.96168	1.96513
115.029		2.01149	2.00731	1.9866	2.00303	1.9333	2.01154	2.02902	1.99532	1.98331	1.94063	1.97938	1.99425	1.9827	2.03874	2.0113	1.95429	2.0106	1.98185	1.96437	2.00817	1.93167	1.95908	1.9589	1.96121
115.431		2.01162	2.00232	1.98347	2.00128	1.92092	2.00171	2.02368	1.99228	1.97778	1.94293	1.97515	1.98994	1.97676	2.03289	2.00837	1.94607	2.01021	1.96927	1.96493	2.00556	1.9251	1.95973	1.95792	1.95822
115.833		2.01119	2.00124	1.97844	1.99795	1.90913	1.99231	2.01615	1.991	1.96947	1.95389	1.97141	1.98852	1.97153	2.02479	2.00708	1.9378	2.01036	1.95636	1.9663	2.00245	1.91919	1.96025	1.95848	1.95645
116.235		2.00981	2.0064	1.97137	1.99328	1.89919	1.98452	2.0072	1.99113	1.9596	1.97333	1.96927	1.99036	1.9672	2.01586	2.0079	1.92985	2.0113	1.944	1.9672	1.99959	1.91536	1.96164	1.95944	1.95595
116.638		2.00702	2.0197	1.96224	1.98778	1.89229	1.9794	1.99751	1.99186	1.95007	1.99689	1.96996	1.99505	1.96397	2.00767	2.01051	1.92304	2.01265	1.93324	1.96617	1.99755	1.91574	1.965	1.95915	1.95609
117.04		2.0024	2.04099	1.95103	1.98205	1.8896	1.97772	1.98782	1.99228	1.94311	2.01737	1.97465	2.00133	1.96176	2.0017	2.01371	1.9189	2.01361	1.9251	1.96213	1.9965	1.92271	1.97119	1.95604	1.95556
117.442		1.99564	2.06576	1.93781	1.97624	1.89217	1.97957	1.97881	1.99169	1.94059	2.0291	1.9836	2.00736	1.96045	1.99874	2.01582	1.91896	2.01319	1.92019	1.95459	1.9961	1.93819	1.98017	1.94934	1.95286
117.844		1.98674	2.08626	1.92266	1.96986	1.90076	1.98457	1.97151	1.98988	1.9433	2.0309	1.99597	2.01146	1.95979	1.99852	2.01521	1.92452	2.01056	1.91838	1.94368	1.99553	1.96204	1.99065	1.93931	1.94664
118.246		1.97597	2.09649	1.90583	1.96198	1.91557	1.99181	1.96746	1.9876	1.95055	2.02458	2.00944	2.01257	1.95944	1.99943	2.01092	1.93535	2.00536	1.91865	1.93	1.99419	1.99103	2.00061	1.92707	1.93624
118.649		1.9639	2.09504	1.88781	1.95147	1.93575	2.00041	1.96873	1.98642	1.96049	2.01332	2.02123	2.01058	1.95939	1.99901	2.00293	1.94996	1.99766	1.91942	1.91447	1.99201	2.01966	2.00844	1.91437	1.92209
119.051		1.95123	2.08392	1.86957	1.93759	1.95851	2.00948	1.97772	1.98853	1.97089	2.00059	2.0288	2.00627	1.95986	1.99454	1.99204	1.9656	1.9879	1.91961	1.89806	1.98982	2.04364	2.01413	1.90352	1.90584
119.453		1.93883	2.06604	1.85267	1.92022	1.98006	2.01836	1.99596	1.99637	1.98031	1.99021	2.03086	2.00096	1.96205	1.98381	1.97967	1.98015	1.97673	1.91912	1.882	1.98936	2.06235	2.01959	1.89759	1.89097
119.855		1.92751	2.04423	1.83937	1.89991	1.9968	2.02622	2.02236	2.01131	1.98858	1.98677	2.0273	1.99634	1.96849	1.96575	1.9678	1.99259	1.96492	1.9189	1.86748	1.99263	2.07773	2.02822	1.90074	1.88381
120.257		1.91826	2.02066	1.83379	1.87775	2.00731	2.03226	2.05228	2.03202	1.99666	1.99441	2.01928	1.99399	1.98368	1.94043	1.95898	2.00318	1.95355	1.92045	1.85592	2.00145	2.09202	2.04381	1.91781	1.89543

## Sheet: Transmission
	No	1	2	3	4	5	6	7	8	9	10	11	12	13	14	15	16	17	18	19	20	21	22	23	24
	Preparation	HC	HC	ANLG	ANLG	HC	LYD	HC	HC	LYD	HC	HC	LYD	HC	EUF	LYD	EUF	EUF	HC	ANLG	ANLG	HC	HC	HC	EUF
Wavelength, cm-1		Transmission Index
1.2066		0.584435	0.592297	0.578907	0.587466	0.597747	0.597333	0.577291	0.580778	0.604239	0.586047	0.585868	0.598145	0.593338	0.587619	0.574567	0.58399	0.599308	0.569555	0.580336	0.57516	0.589816	0.591974	0.578103	0.60773
1.60879		0.59234	0.600904	0.588202	0.597897	0.607508	0.606434	0.586681	0.591133	0.612953	0.595128	0.595386	0.608082	0.603879	0.597796	0.584293	0.594549	0.609278	0.57925	0.58964	0.583891	0.599154	0.599537	0.586092	0.617389
2.01099		0.595648	0.604363	0.591927	0.602464	0.611621	0.610005	0.590592	0.594654	0.616705	0.598544	0.59882	0.612371	0.608569	0.6022	0.588368	0.598665	0.612928	0.583087	0.593064	0.587067	0.602664	0.602538	0.589014	0.621732
2.41319		0.596922	0.605539	0.593189	0.604418	0.613182	0.611154	0.592075	0.595243	0.618243	0.599536	0.599618	0.614137	0.610627	0.603988	0.589948	0.599951	0.613836	0.584383	0.593938	0.587823	0.603653	0.603524	0.589707	0.623662
2.81539		0.597199	0.605602	0.593286	0.605098	0.61346	0.611179	0.592385	0.594553	0.618688	0.599462	0.599232	0.614665	0.611369	0.60446	0.590325	0.599905	0.613502	0.584529	0.593664	0.587479	0.603499	0.603548	0.589363	0.624362
3.21759		0.59695	0.605092	0.592819	0.605121	0.613045	0.610688	0.59211	0.593354	0.618549	0.598944	0.59834	0.61455	0.611404	0.604215	0.590098	0.599216	0.612617	0.584176	0.592894	0.58665	0.602842	0.603091	0.588539	0.624384
3.61979		0.596401	0.604267	0.592084	0.604792	0.612227	0.60998	0.591541	0.592008	0.618073	0.598272	0.597269	0.614091	0.611032	0.603555	0.589563	0.598218	0.611505	0.583644	0.591947	0.585639	0.601988	0.602386	0.587514	0.62401
4.02199		0.595656	0.603247	0.591222	0.604258	0.611146	0.609197	0.590822	0.590672	0.61737	0.597571	0.596167	0.613438	0.610404	0.602632	0.588866	0.59706	0.610305	0.583087	0.590971	0.584583	0.601075	0.601538	0.58642	0.623389
4.42418		0.594753	0.602074	0.590285	0.60358	0.609862	0.608396	0.590015	0.589391	0.616484	0.596872	0.595085	0.612656	0.60959	0.601517	0.588071	0.595797	0.609053	0.582567	0.590024	0.58353	0.600147	0.600586	0.585307	0.622599
4.82638		0.593686	0.600742	0.589277	0.60277	0.60838	0.607579	0.589128	0.588143	0.615407	0.596162	0.594012	0.611761	0.608606	0.600232	0.587189	0.594425	0.607722	0.58209	0.589107	0.58247	0.599194	0.599528	0.584176	0.621664
5.22858		0.592421	0.599209	0.588165	0.601796	0.606665	0.606706	0.58813	0.586868	0.614103	0.595389	0.592897	0.610724	0.607429	0.598759	0.586193	0.592903	0.606248	0.581624	0.588186	0.581354	0.598164	0.598328	0.582989	0.620571
5.63078		0.590894	0.597406	0.586881	0.600595	0.604649	0.605704	0.586954	0.585474	0.612501	0.594481	0.591656	0.609483	0.606	0.597046	0.585019	0.591158	0.604537	0.581101	0.587192	0.580098	0.596973	0.596925	0.581676	0.619263
6.03298		0.589008	0.59523	0.585325	0.599066	0.60223	0.60446	0.585496	0.583842	0.610501	0.593331	0.59017	0.607937	0.604224	0.595008	0.583569	0.589092	0.602466	0.580414	0.586022	0.578585	0.595504	0.595225	0.58013	0.617645
6.43518		0.586639	0.592553	0.583361	0.597072	0.599282	0.602818	0.58362	0.581827	0.607974	0.591802	0.588287	0.605949	0.60197	0.592524	0.581704	0.586584	0.59989	0.579412	0.584531	0.576665	0.593606	0.5931	0.578215	0.615575
6.83738		0.583637	0.589227	0.580818	0.594442	0.595658	0.600588	0.581158	0.579262	0.604765	0.58972	0.58582	0.60335	0.599075	0.589446	0.579251	0.58349	0.59664	0.577904	0.582533	0.574163	0.591097	0.590391	0.575759	0.612873
7.23958		0.579843	0.585098	0.577509	0.590989	0.591211	0.597549	0.57793	0.575971	0.600716	0.586884	0.582566	0.599952	0.595363	0.585614	0.57602	0.579659	0.592549	0.575661	0.579812	0.57089	0.587779	0.586917	0.57258	0.609337
7.64178		0.575114	0.580034	0.573249	0.586533	0.585826	0.593485	0.573765	0.571792	0.595688	0.583095	0.578334	0.595578	0.590677	0.580879	0.571825	0.574959	0.587472	0.572452	0.576146	0.566674	0.583464	0.582503	0.5685	0.604771
8.04397		0.56936	0.573963	0.567903	0.580947	0.579448	0.588228	0.568542	0.56661	0.589601	0.57819	0.572986	0.590101	0.58491	0.575147	0.566535	0.569303	0.581328	0.568083	0.571352	0.5614	0.578023	0.57702	0.56339	0.599034
8.44617		0.562578	0.566898	0.561424	0.574199	0.572116	0.581709	0.562222	0.560392	0.582464	0.572091	0.566483	0.583483	0.57805	0.568405	0.560106	0.562678	0.574136	0.562451	0.565338	0.555044	0.571416	0.570424	0.557204	0.592083
8.84837		0.554868	0.558955	0.553884	0.566382	0.563967	0.573995	0.554875	0.553203	0.574391	0.564846	0.558912	0.575801	0.570197	0.560749	0.552618	0.555167	0.566035	0.555585	0.558141	0.547698	0.56373	0.562786	0.550001	0.584007
9.25057		0.546428	0.55034	0.545477	0.557708	0.555218	0.56529	0.54668	0.545208	0.565592	0.556627	0.550489	0.567246	0.561556	0.552372	0.544268	0.546936	0.557265	0.547657	0.549938	0.539562	0.555169	0.554295	0.541947	0.575024
9.65277		0.537521	0.541316	0.536478	0.548472	0.54613	0.555903	0.537892	0.536646	0.556338	0.547714	0.541515	0.558088	0.552402	0.543535	0.53534	0.538221	0.548128	0.538954	0.541018	0.530917	0.546025	0.545225	0.533289	0.565437
10.055		0.528431	0.532154	0.527203	0.539002	0.53696	0.546185	0.528808	0.52779	0.546911	0.538433	0.532322	0.548632	0.543029	0.534517	0.526155	0.529276	0.538928	0.529827	0.531727	0.522066	0.536623	0.535884	0.524315	0.555577
10.4572		0.519416	0.523099	0.517946	0.529592	0.527923	0.536465	0.519712	0.518906	0.537566	0.529103	0.523213	0.539165	0.533704	0.525575	0.517015	0.520348	0.52992	0.520624	0.522405	0.513289	0.52727	0.526561	0.515305	0.545745
10.8594		0.510683	0.514333	0.508943	0.520475	0.519173	0.527007	0.510843	0.510218	0.5285	0.519994	0.514424	0.529923	0.524634	0.51691	0.508165	0.511638	0.521278	0.511641	0.513337	0.504808	0.518216	0.517488	0.506493	0.536171
11.2616		0.502369	0.505974	0.500355	0.511799	0.510797	0.517984	0.502375	0.501884	0.519842	0.511297	0.506105	0.521068	0.515954	0.508658	0.499772	0.503288	0.513094	0.503092	0.504723	0.496769	0.50963	0.508822	0.498052	0.526997
11.6638		0.494543	0.498076	0.492262	0.503632	0.502826	0.509481	0.494405	0.493995	0.511655	0.503116	0.498325	0.512689	0.507728	0.50088	0.491921	0.495379	0.505382	0.495095	0.496671	0.489239	0.5016	0.50064	0.490076	0.518287
12.066		0.487214	0.490636	0.484678	0.495976	0.495249	0.501508	0.486959	0.486574	0.503946	0.495481	0.491077	0.50481	0.499961	0.493581	0.484622	0.487931	0.498106	0.487678	0.489202	0.482217	0.49414	0.492957	0.482591	0.510042
12.4682		0.480343	0.483612	0.477563	0.488782	0.488026	0.494021	0.480004	0.47959	0.496681	0.488354	0.484305	0.4974	0.492615	0.486716	0.477826	0.480914	0.491192	0.480796	0.48227	0.475649	0.4872	0.485732	0.475565	0.502217
12.8704		0.473861	0.476939	0.470842	0.48197	0.481107	0.486942	0.473464	0.472972	0.489797	0.481657	0.47792	0.490396	0.485629	0.480211	0.471443	0.474267	0.48456	0.474349	0.475781	0.469448	0.480693	0.478894	0.468926	0.494751
13.2726		0.467682	0.47054	0.464427	0.475452	0.474441	0.48018	0.467243	0.466635	0.48322	0.475288	0.471819	0.483714	0.478928	0.473978	0.465364	0.467908	0.478131	0.468215	0.469615	0.463512	0.474509	0.472361	0.462582	0.487578
13.6748		0.461719	0.464346	0.458232	0.469141	0.467984	0.473651	0.461241	0.460492	0.476876	0.469147	0.465907	0.477272	0.472447	0.467929	0.459481	0.461759	0.471847	0.462273	0.463657	0.457745	0.468539	0.466052	0.456443	0.480645
14.077		0.455899	0.458299	0.452186	0.462973	0.461706	0.467288	0.455375	0.454474	0.470705	0.463148	0.460108	0.471001	0.466134	0.461994	0.453704	0.455749	0.465673	0.456423	0.457808	0.45207	0.462692	0.459904	0.450436	0.473917
14.4792		0.450168	0.452362	0.446245	0.456904	0.455584	0.46105	0.449589	0.448537	0.464661	0.457235	0.454372	0.464849	0.459955	0.456123	0.447973	0.44983	0.459596	0.450601	0.452002	0.446438	0.456902	0.453878	0.444514	0.467378
14.8814		0.444496	0.446516	0.440389	0.450916	0.449609	0.454921	0.443853	0.442662	0.458719	0.451381	0.448678	0.458791	0.453896	0.450292	0.44226	0.443976	0.45362	0.444783	0.446212	0.440829	0.451138	0.447956	0.438659	0.461026
15.2836		0.438871	0.440758	0.434618	0.445011	0.443774	0.448903	0.438165	0.436852	0.45287	0.445585	0.443024	0.452819	0.447955	0.444498	0.436562	0.438181	0.447759	0.438975	0.440438	0.435247	0.445395	0.44214	0.432876	0.454867
15.6858		0.433299	0.435094	0.428948	0.439205	0.438075	0.44301	0.432539	0.431125	0.447116	0.439862	0.437427	0.446939	0.44214	0.438754	0.430901	0.432452	0.442027	0.433209	0.434703	0.429713	0.439689	0.436441	0.427183	0.448909
16.088		0.427794	0.429537	0.423398	0.433516	0.432508	0.437257	0.426999	0.425504	0.441466	0.434237	0.431906	0.441166	0.436459	0.43308	0.425306	0.426807	0.436436	0.427524	0.429044	0.424252	0.434047	0.430873	0.421605	0.443151
16.4901		0.422378	0.424096	0.417985	0.427964	0.427069	0.43166	0.42157	0.420011	0.435934	0.428734	0.426486	0.435519	0.43092	0.427504	0.419811	0.421263	0.43099	0.42196	0.423496	0.41889	0.428502	0.425449	0.416166	0.437587
16.8923		0.41707	0.418784	0.412725	0.422565	0.421753	0.426228	0.416274	0.414663	0.430531	0.423374	0.421184	0.430012	0.425529	0.422049	0.414443	0.415841	0.425688	0.41655	0.41809	0.41365	0.423083	0.420176	0.410881	0.432206
17.2945		0.41189	0.413608	0.407622	0.417328	0.416559	0.420964	0.411126	0.409473	0.425267	0.41817	0.416017	0.424659	0.420288	0.416736	0.409226	0.410557	0.420526	0.411313	0.412849	0.408545	0.417814	0.415055	0.40576	0.426992
17.6967		0.406853	0.408574	0.402678	0.412258	0.411486	0.415868	0.406131	0.404443	0.420151	0.413128	0.410994	0.419469	0.415199	0.411581	0.404175	0.405424	0.415499	0.406261	0.407785	0.403583	0.412713	0.410085	0.400803	0.421928
18.0989		0.401971	0.403687	0.397888	0.407355	0.406537	0.410936	0.401293	0.399573	0.415187	0.40825	0.40612	0.414447	0.410261	0.406596	0.399297	0.400453	0.410601	0.401392	0.402902	0.39877	0.407789	0.405263	0.396008	0.417
18.5011		0.39725	0.398948	0.393245	0.402615	0.401717	0.406161	0.396607	0.394859	0.410379	0.403532	0.401398	0.409594	0.405474	0.401786	0.394593	0.395649	0.405833	0.3967	0.398196	0.394104	0.403043	0.400582	0.391368	0.412201
18.9033		0.392694	0.394359	0.388741	0.398034	0.397033	0.401538	0.392068	0.390296	0.405725	0.398969	0.396826	0.404908	0.400836	0.397152	0.390059	0.391015	0.401194	0.392173	0.393658	0.389583	0.398471	0.39604	0.386875	0.407525
19.3055		0.3883	0.38992	0.384369	0.393602	0.392492	0.39706	0.38767	0.38588	0.401223	0.394554	0.3924	0.400383	0.396346	0.392692	0.385688	0.386549	0.396686	0.387796	0.389278	0.385203	0.394066	0.391633	0.382521	0.402971
19.7077		0.384064	0.38563	0.380124	0.389312	0.3881	0.392719	0.383407	0.381604	0.39687	0.390279	0.388114	0.396012	0.392	0.388397	0.381471	0.382248	0.392312	0.383557	0.385045	0.380962	0.389814	0.387356	0.378301	0.398544
20.1099		0.379979	0.381484	0.376	0.385155	0.38386	0.388509	0.379275	0.377467	0.392658	0.386137	0.383961	0.391784	0.387794	0.384258	0.377396	0.378103	0.388074	0.379445	0.380947	0.376855	0.385704	0.38321	0.374208	0.394246
20.5121		0.376033	0.377477	0.371997	0.381122	0.379772	0.384426	0.375269	0.373464	0.388582	0.382119	0.379934	0.38769	0.383725	0.380263	0.373455	0.374104	0.383972	0.375449	0.376977	0.37288	0.381723	0.37919	0.37024	0.39008
20.9143		0.37222	0.373606	0.368116	0.377207	0.375835	0.380462	0.371388	0.369592	0.384634	0.378221	0.376027	0.383721	0.379785	0.3764	0.369638	0.370242	0.380006	0.371562	0.373127	0.369032	0.377862	0.375295	0.366393	0.386047
21.3165		0.36853	0.369863	0.364355	0.373405	0.372045	0.376615	0.367629	0.365849	0.380808	0.374439	0.372234	0.379868	0.375969	0.37266	0.365937	0.366508	0.376175	0.367782	0.369393	0.36531	0.374113	0.371523	0.362666	0.382146
21.7187		0.364957	0.366242	0.360718	0.369713	0.368396	0.372881	0.363991	0.36223	0.377101	0.37077	0.368555	0.376125	0.372272	0.369032	0.362348	0.362892	0.372475	0.364105	0.365771	0.361711	0.370472	0.367871	0.359057	0.378375
22.1209		0.361494	0.362739	0.357203	0.36613	0.364882	0.369258	0.36047	0.35873	0.373508	0.367213	0.364986	0.372489	0.368691	0.365509	0.358866	0.359391	0.368902	0.36053	0.362261	0.358233	0.366937	0.364339	0.355564	0.374731
22.5231		0.358138	0.35935	0.353809	0.362655	0.361496	0.365744	0.357065	0.355344	0.370027	0.363767	0.361529	0.368958	0.365221	0.362088	0.355489	0.355999	0.365454	0.357057	0.358859	0.354874	0.36351	0.360922	0.352185	0.37121
22.9253		0.354885	0.356068	0.350531	0.359287	0.35823	0.362339	0.35377	0.352066	0.366656	0.360431	0.358182	0.365531	0.36186	0.358763	0.352213	0.352714	0.362123	0.353687	0.355566	0.351629	0.360188	0.357617	0.348917	0.367806
23.3275		0.35173	0.352891	0.347364	0.356025	0.355076	0.35904	0.350581	0.348892	0.363391	0.357202	0.354942	0.362207	0.358606	0.355533	0.349036	0.349534	0.358904	0.350417	0.352378	0.348495	0.356972	0.35442	0.345758	0.364515
23.7297		0.34867	0.349812	0.344298	0.352864	0.352023	0.355843	0.347492	0.345814	0.360229	0.354077	0.351803	0.358986	0.355452	0.352393	0.345953	0.346454	0.355788	0.347246	0.349291	0.345466	0.353858	0.351325	0.342701	0.361332
24.1319		0.345698	0.346827	0.341324	0.349799	0.34906	0.352746	0.344498	0.342827	0.357163	0.351048	0.348759	0.355864	0.352396	0.349342	0.34296	0.343471	0.352768	0.344171	0.346301	0.342533	0.350842	0.348325	0.33974	0.35825
24.5341		0.34281	0.343928	0.338431	0.346824	0.346179	0.349742	0.341592	0.339925	0.354188	0.348107	0.3458	0.352837	0.349429	0.346375	0.340049	0.340578	0.349833	0.341186	0.343401	0.339687	0.347914	0.345412	0.336867	0.355263
24.9363		0.339998	0.341108	0.33561	0.343932	0.343368	0.346826	0.338768	0.337102	0.351294	0.345246	0.342917	0.349899	0.346544	0.34349	0.337215	0.337767	0.346975	0.338286	0.340585	0.33692	0.345068	0.342579	0.334075	0.352366
25.3385		0.337258	0.338361	0.332852	0.341115	0.34062	0.343992	0.33602	0.334351	0.348476	0.342454	0.340099	0.347044	0.343735	0.340682	0.334451	0.335029	0.344184	0.335464	0.337845	0.334221	0.342293	0.339817	0.331354	0.349551
25.7407		0.334584	0.33568	0.330151	0.338367	0.33793	0.341233	0.333344	0.331667	0.345725	0.339723	0.33734	0.344263	0.340994	0.337946	0.331751	0.332357	0.341454	0.332713	0.335173	0.331581	0.339583	0.33712	0.328697	0.346811
26.1429		0.331972	0.333058	0.327504	0.335682	0.335293	0.338544	0.330733	0.329044	0.343037	0.337047	0.334634	0.341549	0.338316	0.335279	0.329111	0.329742	0.338779	0.330028	0.332562	0.328995	0.33693	0.33448	0.326097	0.34414
26.5451		0.329418	0.330493	0.324907	0.333055	0.332709	0.33592	0.328183	0.326475	0.340406	0.33442	0.331979	0.338897	0.335695	0.332675	0.326527	0.327179	0.336154	0.3274	0.330006	0.326456	0.334329	0.331894	0.323549	0.341531
26.9473		0.326919	0.327978	0.32236	0.330484	0.330177	0.333355	0.325687	0.323957	0.33783	0.331839	0.329374	0.3363	0.333127	0.330129	0.323999	0.324664	0.333577	0.324825	0.327498	0.323962	0.331778	0.329356	0.321049	0.338976
27.3495		0.324472	0.325512	0.319862	0.327965	0.327698	0.330847	0.323241	0.321483	0.335306	0.329304	0.326819	0.333754	0.33061	0.327636	0.321524	0.322192	0.331047	0.322298	0.325035	0.32151	0.329274	0.326864	0.318594	0.336471
27.7517		0.322073	0.32309	0.317413	0.325495	0.32527	0.328391	0.320838	0.319051	0.332832	0.326812	0.324315	0.331256	0.32814	0.325189	0.3191	0.319761	0.328561	0.319813	0.322611	0.319099	0.326818	0.324415	0.316181	0.33401
28.1539		0.31972	0.320711	0.31501	0.323071	0.322893	0.325982	0.318472	0.316655	0.330405	0.324363	0.32186	0.328803	0.325713	0.322783	0.316725	0.31737	0.326118	0.317367	0.320224	0.316728	0.324406	0.322007	0.313807	0.331587
28.5561		0.317406	0.318369	0.312652	0.320689	0.320561	0.323617	0.31614	0.314294	0.328022	0.321955	0.319452	0.326392	0.323326	0.320411	0.314396	0.315017	0.323715	0.314956	0.317872	0.314394	0.322039	0.319636	0.31147	0.329198
28.9583		0.315126	0.31606	0.310334	0.318344	0.318271	0.321288	0.313838	0.311962	0.325676	0.319585	0.317087	0.324018	0.320974	0.318066	0.312107	0.312698	0.321349	0.312576	0.315552	0.312095	0.319712	0.317301	0.309166	0.32684
29.3605		0.312877	0.313781	0.308053	0.316032	0.316015	0.318993	0.311562	0.309658	0.323364	0.31725	0.31476	0.321679	0.318653	0.315745	0.309853	0.310411	0.319015	0.310226	0.313263	0.309829	0.317421	0.314997	0.306892	0.324511
29.7627		0.310652	0.311527	0.305803	0.313747	0.313788	0.316724	0.309312	0.307379	0.321078	0.314946	0.312464	0.31937	0.316358	0.313443	0.30763	0.308152	0.316707	0.307902	0.311003	0.30759	0.315163	0.312724	0.304646	0.322208
30.1649		0.308448	0.309293	0.303582	0.311486	0.311583	0.314478	0.307087	0.305123	0.318815	0.312668	0.310194	0.317086	0.314085	0.311157	0.30543	0.305919	0.314422	0.305605	0.30877	0.305376	0.31293	0.310477	0.302423	0.31993
30.5671		0.306262	0.307078	0.301386	0.309245	0.309396	0.312252	0.304887	0.302888	0.316568	0.310416	0.307945	0.314824	0.311831	0.308886	0.303251	0.303707	0.312155	0.303334	0.306563	0.303184	0.310721	0.308254	0.300222	0.317676
30.9693		0.304093	0.304879	0.299213	0.307023	0.307223	0.310042	0.302712	0.300675	0.314334	0.308185	0.305713	0.31258	0.309596	0.306628	0.301088	0.301516	0.309903	0.301089	0.304379	0.301012	0.308529	0.306055	0.298044	0.315447
31.3715		0.301939	0.302696	0.297062	0.304818	0.305063	0.307847	0.300561	0.298482	0.312112	0.305976	0.303495	0.310351	0.307378	0.304384	0.29894	0.299343	0.307664	0.298869	0.302217	0.298859	0.306354	0.303879	0.295887	0.313241
31.7737		0.299798	0.300529	0.294932	0.302631	0.302918	0.305669	0.298433	0.296311	0.309902	0.303789	0.301292	0.308136	0.305178	0.302154	0.296806	0.297189	0.305441	0.296676	0.300076	0.296724	0.304193	0.301726	0.293754	0.311058
32.1759		0.297671	0.298379	0.292826	0.300461	0.300787	0.303506	0.296327	0.294164	0.307702	0.301624	0.299103	0.305933	0.302995	0.299937	0.294685	0.295053	0.303232	0.294507	0.297954	0.294609	0.302045	0.299596	0.291646	0.308895
32.5781		0.295554	0.296245	0.290744	0.298308	0.298673	0.30136	0.29424	0.292039	0.305515	0.299483	0.296928	0.303739	0.300827	0.297729	0.292578	0.292935	0.30104	0.292361	0.29585	0.292511	0.299908	0.297491	0.289564	0.30675
32.9803		0.293445	0.294128	0.288688	0.296171	0.296575	0.299228	0.292167	0.289938	0.303339	0.297365	0.294768	0.301553	0.298673	0.295525	0.290484	0.290833	0.298866	0.290234	0.29376	0.29043	0.297779	0.29541	0.287508	0.30462
33.3825		0.291342	0.292026	0.28666	0.294048	0.294491	0.297108	0.290105	0.287859	0.301172	0.295267	0.29262	0.299371	0.296528	0.293319	0.288403	0.288745	0.29671	0.28812	0.291681	0.288364	0.295654	0.293352	0.285476	0.3025
33.7847		0.289239	0.289938	0.284659	0.291934	0.292419	0.294996	0.28805	0.285798	0.299012	0.293188	0.290483	0.29719	0.294388	0.291102	0.286333	0.286668	0.294569	0.286016	0.28961	0.286308	0.293528	0.291315	0.283468	0.300384
34.1869		0.287134	0.287859	0.282685	0.289826	0.290355	0.292886	0.285997	0.28375	0.296854	0.291122	0.288351	0.295006	0.292246	0.288867	0.284271	0.284597	0.292442	0.283915	0.287541	0.284256	0.291394	0.289294	0.281478	0.298269
34.5891		0.285023	0.285787	0.280734	0.287718	0.288293	0.29077	0.283943	0.281711	0.294692	0.289063	0.286223	0.292817	0.290099	0.286607	0.282214	0.28253	0.290323	0.281813	0.285469	0.282206	0.28925	0.287284	0.279502	0.296148
34.9913		0.282903	0.283718	0.278803	0.285608	0.286228	0.288644	0.281885	0.279674	0.29252	0.287007	0.284092	0.29062	0.287941	0.284319	0.280159	0.280462	0.28821	0.279707	0.28339	0.280152	0.287089	0.285278	0.277535	0.294017
35.3935		0.280775	0.28165	0.276885	0.283492	0.284158	0.286505	0.279822	0.277637	0.290336	0.284948	0.281959	0.288417	0.285772	0.282006	0.278103	0.278392	0.286098	0.277598	0.281303	0.278091	0.284912	0.28327	0.275573	0.291876
35.7957		0.27864	0.279583	0.274976	0.281372	0.28208	0.284352	0.277754	0.275597	0.28814	0.282883	0.27982	0.28621	0.283595	0.279674	0.276046	0.27632	0.283985	0.275488	0.279206	0.276026	0.282722	0.281256	0.273612	0.289724
36.1979		0.276504	0.277517	0.27307	0.279251	0.279998	0.28219	0.275683	0.273555	0.285934	0.280811	0.277679	0.284005	0.281414	0.277338	0.273988	0.274248	0.281872	0.27338	0.277105	0.273957	0.280525	0.279233	0.271648	0.287566
36.6001		0.274375	0.275456	0.271161	0.277133	0.277914	0.280027	0.273614	0.271515	0.283729	0.278735	0.275541	0.28181	0.279238	0.275015	0.271934	0.272181	0.279761	0.271282	0.275004	0.27189	0.278332	0.277204	0.269682	0.285409
37.0023		0.272262	0.273405	0.269248	0.275028	0.275838	0.277873	0.271553	0.269481	0.281534	0.276658	0.273411	0.279635	0.277078	0.272725	0.26989	0.270126	0.277657	0.2692	0.272913	0.269833	0.276157	0.27517	0.267715	0.283262
37.4045		0.270177	0.271369	0.267328	0.272944	0.273777	0.275742	0.269507	0.267461	0.279364	0.274587	0.271298	0.27749	0.274947	0.270489	0.267862	0.26809	0.275565	0.267141	0.270843	0.267793	0.274013	0.273139	0.265748	0.281135
37.8067		0.268131	0.269354	0.265401	0.270889	0.27174	0.273647	0.267482	0.26546	0.277232	0.27253	0.26921	0.275387	0.272855	0.268326	0.265858	0.266079	0.273493	0.26511	0.268803	0.265778	0.271914	0.271118	0.263786	0.279038
38.2089		0.266133	0.267368	0.263469	0.268872	0.269735	0.271597	0.265487	0.263483	0.275152	0.270494	0.267155	0.273332	0.270812	0.266248	0.263886	0.2641	0.271444	0.263111	0.266803	0.263792	0.269873	0.269115	0.26183	0.276982
38.6111		0.264188	0.265412	0.261533	0.266896	0.267766	0.2696	0.263526	0.261535	0.27313	0.268486	0.26514	0.271332	0.268822	0.264264	0.261949	0.262158	0.269424	0.261146	0.264848	0.26184	0.267897	0.267136	0.259886	0.27497
39.0133		0.262299	0.26349	0.259598	0.264965	0.265835	0.267658	0.261602	0.259615	0.271171	0.266509	0.263166	0.269387	0.266887	0.262374	0.260051	0.260252	0.267434	0.259215	0.26294	0.259924	0.265988	0.265185	0.257954	0.273008
39.4155		0.260463	0.261601	0.257663	0.263076	0.263938	0.265769	0.259714	0.257723	0.269273	0.264565	0.261236	0.267495	0.265004	0.260571	0.25819	0.258383	0.265475	0.257315	0.261078	0.25804	0.264144	0.263265	0.256037	0.271094
39.8177		0.258675	0.259743	0.255732	0.261225	0.262073	0.263927	0.257861	0.255856	0.267428	0.262652	0.259347	0.265651	0.263168	0.258846	0.256363	0.256548	0.263543	0.255443	0.259258	0.256188	0.262358	0.261375	0.254135	0.269224
40.2199		0.256925	0.257913	0.253805	0.259408	0.260231	0.262123	0.256039	0.254012	0.265627	0.260767	0.257493	0.263846	0.26137	0.257182	0.254565	0.254742	0.261637	0.253598	0.257471	0.254361	0.26062	0.259511	0.252249	0.26739
40.6221		0.255204	0.256106	0.251883	0.257617	0.258407	0.260348	0.254241	0.252187	0.263859	0.258905	0.255669	0.262069	0.2596	0.255563	0.25279	0.25296	0.259752	0.251775	0.255709	0.252557	0.258917	0.257672	0.250378	0.265586
41.0243		0.253502	0.254316	0.249968	0.255847	0.256595	0.258592	0.252461	0.25038	0.262111	0.257061	0.253868	0.260312	0.257849	0.253972	0.251031	0.251195	0.257887	0.249973	0.253965	0.25077	0.257235	0.255853	0.248523	0.263802
41.4265		0.251809	0.252538	0.248062	0.254091	0.254794	0.256847	0.250695	0.248587	0.260374	0.25523	0.252081	0.258564	0.256108	0.252392	0.249283	0.249443	0.256037	0.248189	0.25223	0.248997	0.255563	0.25405	0.246686	0.26203
41.8287		0.25012	0.250771	0.246167	0.252346	0.253	0.255107	0.248936	0.246807	0.258641	0.253407	0.250304	0.256818	0.254372	0.250809	0.247542	0.247699	0.2542	0.24642	0.2505	0.247236	0.25389	0.252262	0.244868	0.260264
42.2309		0.248427	0.24901	0.244288	0.250606	0.251216	0.253367	0.247182	0.24504	0.256905	0.251592	0.24853	0.255068	0.252634	0.249212	0.245806	0.245958	0.252376	0.244664	0.248771	0.245486	0.252209	0.250485	0.24307	0.258499
42.6331		0.246729	0.247254	0.242427	0.248868	0.249442	0.251625	0.245429	0.243282	0.255163	0.249782	0.246757	0.25331	0.250891	0.247591	0.244074	0.244218	0.250561	0.242917	0.247042	0.243743	0.250515	0.248718	0.241293	0.256731
43.0353		0.245022	0.245503	0.240588	0.24713	0.24768	0.24988	0.243675	0.241533	0.253414	0.247977	0.244983	0.251539	0.24914	0.245939	0.242344	0.242476	0.248755	0.241177	0.245311	0.242009	0.248805	0.24696	0.239538	0.254959
43.4375		0.243306	0.243757	0.238776	0.245387	0.245927	0.248131	0.24192	0.239792	0.251656	0.246179	0.243206	0.249755	0.247379	0.244251	0.240617	0.240733	0.246957	0.239439	0.243579	0.24028	0.247077	0.245209	0.237802	0.25318
43.8397		0.24158	0.242015	0.23699	0.243639	0.244184	0.246379	0.240163	0.238055	0.249889	0.244387	0.241429	0.247958	0.245608	0.242528	0.238892	0.238989	0.245164	0.237701	0.241846	0.238557	0.245332	0.243464	0.236085	0.251394
44.2419		0.239844	0.240277	0.235233	0.241882	0.242447	0.244623	0.238404	0.236322	0.248114	0.242602	0.239652	0.246147	0.243827	0.24077	0.23717	0.237244	0.243376	0.235961	0.240114	0.236837	0.243573	0.241724	0.234383	0.249602
44.6441		0.238102	0.238542	0.233504	0.240119	0.240714	0.242863	0.236645	0.234592	0.246331	0.240827	0.237878	0.244327	0.242039	0.238983	0.235449	0.2355	0.241592	0.234219	0.238384	0.23512	0.241802	0.239989	0.232692	0.247804
45.0463		0.236355	0.23681	0.2318	0.23835	0.238981	0.241103	0.234888	0.232865	0.244544	0.239061	0.236109	0.242502	0.240246	0.237174	0.233732	0.233761	0.239814	0.232477	0.236658	0.233405	0.240024	0.238259	0.231009	0.246002
45.4485		0.234609	0.235079	0.230119	0.23658	0.237247	0.239343	0.233137	0.231144	0.242755	0.237307	0.234348	0.240678	0.238455	0.235354	0.232018	0.23203	0.238043	0.230737	0.234937	0.231694	0.238244	0.236536	0.229331	0.2442
45.8507		0.232868	0.233352	0.228458	0.234814	0.235513	0.237587	0.231396	0.22943	0.240969	0.235566	0.232597	0.238863	0.236671	0.233536	0.230311	0.23031	0.236281	0.229003	0.233226	0.229987	0.236472	0.234821	0.227657	0.2424
46.2529		0.231142	0.231628	0.226812	0.233058	0.233781	0.235842	0.229669	0.227728	0.239192	0.233842	0.230861	0.237064	0.234902	0.231733	0.228614	0.228604	0.234532	0.227281	0.231527	0.228287	0.234713	0.233118	0.225986	0.24061
46.6551		0.229435	0.229912	0.22518	0.231319	0.232057	0.23411	0.227961	0.226043	0.237429	0.232136	0.229142	0.235289	0.233154	0.229958	0.226929	0.226916	0.232798	0.225574	0.229844	0.226596	0.232977	0.231429	0.224319	0.238835
47.0573		0.227754	0.228206	0.223558	0.229602	0.230345	0.232399	0.226277	0.224378	0.235688	0.230451	0.227444	0.233544	0.231436	0.228222	0.225263	0.225249	0.231082	0.223889	0.22818	0.224917	0.231269	0.229756	0.222659	0.237083
47.4595		0.226104	0.226516	0.221944	0.227912	0.228651	0.230713	0.22462	0.222737	0.233971	0.22879	0.22577	0.231833	0.229749	0.226531	0.223619	0.223604	0.229385	0.222228	0.226538	0.223253	0.229594	0.228101	0.22101	0.23536
47.8617		0.224488	0.224844	0.220339	0.22625	0.226979	0.229053	0.22299	0.22112	0.232283	0.227154	0.224121	0.23016	0.228097	0.22489	0.221998	0.221984	0.227707	0.220596	0.224917	0.221606	0.227955	0.226466	0.219375	0.233669
48.2638		0.222903	0.223196	0.218744	0.224616	0.225332	0.227422	0.221389	0.219526	0.230624	0.225542	0.222497	0.228523	0.226479	0.223295	0.220402	0.220388	0.226047	0.218993	0.223319	0.219979	0.226349	0.224849	0.217758	0.232012
48.666		0.221348	0.221572	0.217159	0.223008	0.223709	0.225816	0.219815	0.217955	0.228994	0.223955	0.220898	0.226922	0.224889	0.221743	0.21883	0.218816	0.224403	0.21742	0.221741	0.218373	0.224772	0.223251	0.216162	0.230387
49.0682		0.219817	0.219973	0.215587	0.221423	0.222111	0.224232	0.218263	0.216401	0.227389	0.22239	0.21932	0.22535	0.223323	0.220222	0.21728	0.217265	0.222774	0.215875	0.22018	0.216787	0.223219	0.22167	0.214587	0.22879
49.4704		0.2183	0.218397	0.214032	0.219855	0.220531	0.222662	0.21673	0.21486	0.225804	0.220843	0.21776	0.223803	0.221772	0.21872	0.21575	0.215732	0.221156	0.214353	0.218633	0.215223	0.221679	0.220105	0.213035	0.227211
49.8726		0.216791	0.216841	0.212497	0.218299	0.218965	0.221099	0.215211	0.213328	0.224232	0.219311	0.216212	0.222272	0.220226	0.217224	0.214234	0.21421	0.219549	0.212848	0.217094	0.213678	0.220146	0.218552	0.211504	0.225641
50.2748		0.215279	0.215299	0.210982	0.216747	0.217406	0.219534	0.213701	0.211802	0.222667	0.217787	0.214671	0.220748	0.218678	0.215717	0.212728	0.212695	0.21795	0.211355	0.215559	0.212149	0.21861	0.21701	0.209992	0.22407
50.677		0.213754	0.213767	0.209489	0.215193	0.215848	0.217958	0.212196	0.210278	0.2211	0.216269	0.213131	0.219219	0.21712	0.214185	0.211228	0.211177	0.216359	0.209866	0.214022	0.210635	0.217063	0.215475	0.208495	0.22249
51.0792		0.21221	0.21224	0.208018	0.213627	0.214285	0.216366	0.21069	0.208756	0.219522	0.214753	0.211586	0.217675	0.215546	0.212616	0.209728	0.209649	0.214775	0.208374	0.21248	0.209131	0.2155	0.213945	0.207012	0.220893
51.4814		0.210638	0.210711	0.206568	0.212044	0.212713	0.214751	0.209181	0.207236	0.217926	0.213236	0.210033	0.216105	0.213951	0.210996	0.208222	0.208105	0.213198	0.206875	0.210928	0.20763	0.213913	0.212416	0.205539	0.219274
51.8836		0.209035	0.209177	0.205137	0.210437	0.211128	0.21311	0.207666	0.205717	0.216304	0.211716	0.208467	0.2145	0.212335	0.209318	0.206705	0.206539	0.211627	0.205362	0.209362	0.206128	0.212299	0.210885	0.204074	0.217632
52.2858		0.207395	0.207632	0.203724	0.208802	0.209532	0.211442	0.206143	0.204199	0.21465	0.210192	0.206886	0.212853	0.210695	0.207574	0.205174	0.20495	0.210061	0.203832	0.207779	0.204619	0.210653	0.209351	0.202616	0.215964
52.688		0.20572	0.206074	0.202327	0.207138	0.207923	0.209747	0.20461	0.202684	0.212959	0.208664	0.205289	0.211162	0.209031	0.20576	0.203623	0.203338	0.208495	0.202283	0.206177	0.203098	0.208972	0.20781	0.201164	0.214273
53.0902		0.204012	0.204499	0.200944	0.205445	0.206304	0.208028	0.203066	0.20117	0.211229	0.207131	0.203677	0.209427	0.207344	0.203878	0.20205	0.201706	0.206928	0.200715	0.204554	0.201562	0.207257	0.206262	0.199716	0.21256
53.4924		0.202275	0.202906	0.199572	0.203728	0.204676	0.20629	0.20151	0.199657	0.20946	0.205592	0.202051	0.207655	0.205636	0.201935	0.200455	0.20006	0.205357	0.199127	0.20291	0.20001	0.205509	0.204707	0.198272	0.210828
53.8946		0.200519	0.201297	0.19821	0.201994	0.203042	0.204538	0.199942	0.198144	0.207658	0.204049	0.200416	0.205856	0.203908	0.199942	0.19884	0.198407	0.203778	0.197522	0.20125	0.198442	0.203734	0.203144	0.19683	0.209081
54.2968		0.198754	0.199675	0.196854	0.200254	0.201405	0.202782	0.198366	0.19663	0.205831	0.202501	0.198776	0.204043	0.202165	0.197918	0.197211	0.196756	0.202191	0.195906	0.199577	0.196862	0.201943	0.201578	0.195391	0.207325
54.699		0.196994	0.198046	0.195501	0.198522	0.199771	0.201033	0.196784	0.195116	0.203992	0.200951	0.197141	0.202236	0.200417	0.19589	0.195578	0.195116	0.200597	0.194285	0.197901	0.195278	0.20015	0.20001	0.193952	0.20557
55.1012		0.195256	0.196419	0.194148	0.196813	0.198145	0.199302	0.195205	0.193603	0.202158	0.199402	0.195519	0.200454	0.198674	0.19389	0.193954	0.193495	0.199002	0.192672	0.196232	0.193697	0.198375	0.198447	0.192513	0.203828
55.5034		0.193556	0.194805	0.192789	0.195144	0.196536	0.197606	0.193637	0.192093	0.200349	0.197858	0.193922	0.198718	0.196951	0.191952	0.192354	0.191902	0.197413	0.191078	0.194584	0.192131	0.196638	0.196895	0.191071	0.202113
55.9056		0.191907	0.193214	0.191421	0.193529	0.194952	0.195957	0.192092	0.190592	0.198588	0.196325	0.19236	0.197045	0.195268	0.190113	0.190794	0.190343	0.195839	0.189517	0.192971	0.19059	0.19496	0.195361	0.189629	0.200443
56.3078		0.190325	0.191658	0.190041	0.191983	0.193404	0.194368	0.190582	0.189106	0.196896	0.194811	0.190844	0.195452	0.193642	0.188404	0.189287	0.188825	0.194292	0.188001	0.191403	0.189084	0.193359	0.193852	0.188187	0.198832
56.71		0.188818	0.190145	0.188647	0.190513	0.191898	0.192849	0.189117	0.187641	0.195292	0.193322	0.189381	0.193948	0.192088	0.186848	0.187843	0.187352	0.192781	0.186542	0.189893	0.18762	0.191848	0.192374	0.186748	0.197293
57.1122		0.187391	0.188681	0.187238	0.189123	0.19044	0.191404	0.187704	0.186205	0.193786	0.191864	0.187977	0.192539	0.190618	0.185454	0.186467	0.185927	0.191317	0.185143	0.188447	0.186205	0.190431	0.190931	0.185316	0.19583
57.5144		0.186043	0.187267	0.185814	0.187811	0.18903	0.190031	0.186345	0.184802	0.192384	0.190441	0.18663	0.19122	0.189232	0.184216	0.185155	0.184547	0.189905	0.183807	0.187064	0.184837	0.189105	0.189522	0.183896	0.194444
57.9166		0.184767	0.1859	0.184379	0.186565	0.187665	0.188722	0.185036	0.183436	0.19108	0.189054	0.185334	0.189984	0.187925	0.183116	0.183898	0.183211	0.188547	0.182524	0.185744	0.183513	0.187858	0.188147	0.182492	0.193124
58.3188		0.183551	0.184575	0.182934	0.185371	0.186337	0.187463	0.183769	0.182104	0.189861	0.187701	0.18408	0.188814	0.18668	0.182121	0.182685	0.181909	0.187241	0.181286	0.184476	0.182227	0.186672	0.186797	0.181107	0.191856
58.721		0.182378	0.183284	0.181485	0.184209	0.185033	0.186237	0.18253	0.180802	0.188707	0.186378	0.182853	0.187691	0.185476	0.181191	0.181497	0.180634	0.185978	0.180075	0.18325	0.180968	0.185527	0.185466	0.17974	0.19062
59.1232		0.181228	0.182016	0.180037	0.183057	0.18374	0.185025	0.181304	0.179521	0.187591	0.185076	0.18164	0.186595	0.184288	0.180285	0.180318	0.179374	0.184749	0.178874	0.182051	0.179727	0.184398	0.184144	0.178391	0.189397
59.5254		0.180082	0.180762	0.178595	0.181894	0.182447	0.183809	0.180075	0.178251	0.186487	0.183787	0.180427	0.185502	0.183091	0.179362	0.179132	0.178118	0.183539	0.177667	0.180865	0.178493	0.183264	0.182821	0.177055	0.188166
59.9276		0.178918	0.179511	0.177164	0.180703	0.181142	0.182574	0.17883	0.17698	0.185369	0.182501	0.179201	0.184392	0.181866	0.178395	0.177925	0.176856	0.182335	0.176442	0.179678	0.177257	0.182108	0.181489	0.175727	0.186913
60.3298		0.177723	0.178255	0.17575	0.179472	0.179817	0.181309	0.177559	0.1757	0.184217	0.181209	0.177955	0.183247	0.180598	0.177362	0.176691	0.175582	0.181124	0.175189	0.178479	0.176013	0.180919	0.180144	0.174402	0.185627
60.732		0.176487	0.176987	0.174357	0.178198	0.178471	0.180012	0.17626	0.174404	0.183016	0.179907	0.176687	0.182056	0.179284	0.176257	0.175426	0.17429	0.179895	0.173906	0.177261	0.174755	0.179691	0.178782	0.173076	0.184303
61.1342		0.175206	0.175703	0.172987	0.176884	0.177103	0.178683	0.174933	0.17309	0.18176	0.178593	0.175398	0.180811	0.177928	0.175084	0.17413	0.172981	0.17864	0.172597	0.17602	0.173482	0.178424	0.177406	0.171748	0.182941
61.5364		0.173887	0.174402	0.17164	0.175539	0.175719	0.17733	0.173585	0.171762	0.180454	0.177269	0.174093	0.179512	0.176538	0.173857	0.17281	0.171656	0.177356	0.171269	0.174757	0.172196	0.177123	0.17602	0.170416	0.181548
61.9386		0.172543	0.173086	0.170314	0.174179	0.174324	0.175962	0.172227	0.170422	0.179104	0.17594	0.172781	0.178168	0.17513	0.172592	0.171476	0.170318	0.176043	0.169933	0.173474	0.170897	0.175798	0.174631	0.169083	0.180133
62.3408		0.171189	0.171759	0.169007	0.172816	0.172927	0.174592	0.170869	0.169079	0.177724	0.174611	0.171471	0.176787	0.173718	0.17131	0.170137	0.168972	0.174703	0.168599	0.172176	0.16959	0.174459	0.173246	0.167751	0.178707
62.743		0.169845	0.170427	0.167713	0.171461	0.171535	0.17323	0.169523	0.167739	0.176328	0.17329	0.170171	0.175386	0.172317	0.170026	0.168804	0.167621	0.17334	0.16728	0.170868	0.16828	0.173116	0.171871	0.166421	0.177282
63.1452		0.168524	0.169097	0.166428	0.170122	0.170155	0.171884	0.168194	0.166407	0.174929	0.171979	0.168887	0.173978	0.170934	0.168752	0.167485	0.16627	0.171961	0.165982	0.169557	0.166971	0.171776	0.170511	0.165094	0.175871
63.5474		0.167239	0.167774	0.165147	0.168799	0.168791	0.170558	0.166889	0.165087	0.173536	0.170681	0.167621	0.172577	0.169575	0.167495	0.166186	0.164922	0.17057	0.164709	0.168247	0.165667	0.170447	0.169166	0.163767	0.174482
63.9496		0.165991	0.16646	0.163868	0.167488	0.167445	0.16925	0.165609	0.163779	0.172156	0.169395	0.166372	0.17119	0.168241	0.166255	0.164906	0.163581	0.169175	0.163462	0.166942	0.164371	0.169133	0.167835	0.162439	0.173121
64.3518		0.164777	0.165154	0.162587	0.166181	0.166116	0.167958	0.16435	0.162481	0.170791	0.168118	0.165135	0.169824	0.166927	0.165028	0.163643	0.162248	0.16778	0.162239	0.165647	0.163084	0.167834	0.166511	0.161108	0.171788
64.754		0.163586	0.163853	0.161304	0.164869	0.164803	0.166673	0.163108	0.161189	0.169441	0.166848	0.163905	0.168479	0.16563	0.163808	0.16239	0.160926	0.166388	0.161033	0.164363	0.161807	0.166551	0.165191	0.159769	0.170479
65.1562		0.162403	0.162552	0.160016	0.163546	0.1635	0.165388	0.161878	0.159901	0.168104	0.165579	0.162674	0.167153	0.164343	0.162589	0.161138	0.159618	0.165003	0.159836	0.163092	0.160537	0.165282	0.163868	0.158424	0.169187
65.5584		0.161213	0.161246	0.158725	0.162209	0.162204	0.164094	0.160653	0.15861	0.166776	0.16431	0.161435	0.165842	0.16306	0.161362	0.15988	0.158323	0.163625	0.15864	0.161834	0.159269	0.164025	0.162539	0.157072	0.1679
65.9606		0.160001	0.159933	0.157427	0.160859	0.160908	0.162785	0.159428	0.157316	0.165453	0.163038	0.160184	0.164542	0.161775	0.160122	0.158609	0.157041	0.162254	0.157435	0.160585	0.158002	0.162774	0.161202	0.155717	0.166604
66.3628		0.158758	0.158613	0.156122	0.159502	0.159608	0.161457	0.158196	0.156016	0.16413	0.161762	0.158918	0.163248	0.160484	0.158862	0.157321	0.155771	0.160889	0.156213	0.159339	0.15673	0.161523	0.159861	0.154363	0.165287
66.765		0.15748	0.15729	0.154809	0.158147	0.158302	0.160109	0.156953	0.154712	0.162802	0.160479	0.157636	0.161957	0.159183	0.15758	0.156013	0.154509	0.15953	0.154968	0.15809	0.155453	0.160268	0.158518	0.153014	0.16394
67.1672		0.156168	0.155969	0.15349	0.156804	0.156989	0.158744	0.155692	0.153407	0.161465	0.159188	0.15634	0.160666	0.157869	0.156272	0.154688	0.153252	0.158177	0.153696	0.156832	0.154171	0.158999	0.15718	0.151677	0.16256
67.5694		0.154829	0.154656	0.152167	0.155478	0.15567	0.157366	0.154408	0.152104	0.160114	0.157889	0.155032	0.159374	0.156543	0.154939	0.153353	0.151997	0.156833	0.152397	0.155559	0.152889	0.157714	0.155851	0.150354	0.161149
67.9716		0.153474	0.153356	0.150847	0.154175	0.154349	0.155983	0.153097	0.150807	0.15875	0.156581	0.153714	0.158077	0.155203	0.153584	0.152014	0.15074	0.155498	0.151075	0.154272	0.151611	0.156408	0.154538	0.149048	0.159717
68.3738		0.152114	0.152066	0.149537	0.152893	0.153033	0.154602	0.151758	0.149518	0.157372	0.155266	0.152391	0.156774	0.153852	0.152209	0.150683	0.14948	0.154177	0.149737	0.152973	0.150343	0.155079	0.153243	0.147761	0.158275
68.776		0.150758	0.150785	0.148249	0.151627	0.151726	0.153227	0.150392	0.148238	0.155984	0.153946	0.151065	0.155461	0.152493	0.15082	0.149369	0.148214	0.152871	0.148392	0.151669	0.149091	0.153726	0.151968	0.146493	0.156839
69.1782		0.149413	0.149502	0.146992	0.150367	0.150432	0.151859	0.149004	0.146963	0.15459	0.152626	0.14974	0.154133	0.151129	0.149422	0.148079	0.146942	0.151579	0.147049	0.150367	0.147857	0.152351	0.150712	0.145241	0.155419
69.5804		0.148079	0.148211	0.145773	0.149102	0.149152	0.150495	0.147601	0.145688	0.153194	0.15131	0.148417	0.152786	0.14976	0.148018	0.146819	0.145661	0.150299	0.145714	0.149076	0.146638	0.150953	0.149473	0.144004	0.154024
69.9826		0.146751	0.146904	0.144595	0.147822	0.147882	0.149128	0.146193	0.144404	0.151802	0.150003	0.1471	0.151414	0.148389	0.146607	0.145586	0.144371	0.149026	0.144393	0.147798	0.145428	0.149531	0.148247	0.142778	0.152655
70.3848		0.145421	0.145577	0.143458	0.146519	0.146616	0.147747	0.144788	0.143107	0.150414	0.148707	0.145789	0.150016	0.147014	0.145185	0.144374	0.143069	0.147754	0.143086	0.146536	0.144219	0.148087	0.147025	0.14156	0.151308
70.787		0.14408	0.144235	0.142352	0.14519	0.145346	0.146344	0.143394	0.141793	0.14903	0.147423	0.144485	0.148589	0.145636	0.143744	0.143171	0.141754	0.146476	0.141793	0.145284	0.143005	0.14662	0.145801	0.140349	0.149974
71.1892		0.14272	0.142883	0.141265	0.14384	0.144064	0.144913	0.142015	0.140463	0.147648	0.146151	0.143188	0.147138	0.144253	0.142276	0.141963	0.140423	0.145188	0.140513	0.144037	0.141778	0.145134	0.144566	0.139141	0.148645
71.5914		0.141339	0.141534	0.140181	0.142475	0.142764	0.143456	0.140651	0.139124	0.146265	0.144887	0.141896	0.145669	0.142866	0.140779	0.140736	0.13908	0.14389	0.139246	0.142786	0.140538	0.143636	0.143311	0.137936	0.147311
71.9936		0.139938	0.140198	0.139084	0.141105	0.141443	0.14198	0.139302	0.137787	0.14488	0.143628	0.140608	0.144192	0.141476	0.139255	0.139483	0.137726	0.142582	0.137996	0.141527	0.139288	0.142138	0.142032	0.13673	0.14597
72.3958		0.138527	0.138881	0.137959	0.139742	0.140106	0.1405	0.137966	0.136466	0.143494	0.14237	0.139322	0.142722	0.140088	0.137715	0.138199	0.136369	0.14127	0.136767	0.140255	0.138035	0.140654	0.140725	0.135522	0.144623
72.798		0.137117	0.137588	0.136796	0.138395	0.138761	0.139035	0.136643	0.135174	0.142111	0.14111	0.138036	0.141274	0.138705	0.136179	0.13689	0.135019	0.139959	0.135565	0.13897	0.136786	0.1392	0.139393	0.134309	0.143275
73.2002		0.135721	0.136315	0.135589	0.13707	0.13742	0.137604	0.135334	0.13392	0.140741	0.139845	0.136747	0.13986	0.137334	0.134673	0.135563	0.133687	0.138653	0.134394	0.137676	0.135549	0.137791	0.138039	0.13309	0.141933
73.6024		0.134351	0.135057	0.13434	0.135768	0.136096	0.136223	0.134045	0.132708	0.139394	0.138573	0.135455	0.138491	0.135979	0.133221	0.134233	0.132384	0.137354	0.133255	0.136376	0.134326	0.136437	0.136671	0.131861	0.140605
74.0046		0.133015	0.133806	0.133054	0.134493	0.1348	0.134903	0.132781	0.131533	0.138082	0.137294	0.134157	0.137174	0.134644	0.131844	0.132911	0.131122	0.136063	0.132144	0.135077	0.133116	0.135142	0.135295	0.130621	0.139295
74.4068		0.131719	0.132555	0.131741	0.133243	0.133539	0.13365	0.131545	0.130388	0.136815	0.136007	0.132856	0.135908	0.133333	0.130553	0.131611	0.129907	0.134776	0.131054	0.133781	0.131915	0.133904	0.133919	0.129371	0.138005
74.809		0.130463	0.131301	0.130411	0.132021	0.132315	0.132461	0.130339	0.129262	0.135601	0.134711	0.131553	0.134686	0.132048	0.129349	0.13034	0.128741	0.13349	0.129973	0.132495	0.130716	0.132713	0.132547	0.128115	0.136734
75.2112		0.129247	0.130044	0.129076	0.130829	0.131123	0.13133	0.129159	0.128143	0.134438	0.133409	0.130256	0.133496	0.130793	0.12822	0.129104	0.12762	0.132203	0.12889	0.131224	0.12951	0.131557	0.131183	0.12686	0.135477
75.6134		0.128071	0.128786	0.127744	0.129671	0.129952	0.130246	0.127999	0.127023	0.133318	0.132101	0.12897	0.132324	0.129568	0.127148	0.127904	0.126535	0.130915	0.127794	0.129973	0.12829	0.130421	0.129829	0.125614	0.13423
76.0156		0.126934	0.127534	0.126422	0.128547	0.128789	0.129197	0.126848	0.125896	0.132227	0.130788	0.127703	0.131154	0.128374	0.126112	0.126739	0.12547	0.129631	0.126679	0.128748	0.12705	0.12929	0.12849	0.124387	0.132989
76.4178		0.125834	0.126292	0.125113	0.127458	0.127617	0.128171	0.125698	0.124761	0.131141	0.129473	0.126461	0.129975	0.127212	0.125089	0.125603	0.124407	0.128356	0.125542	0.127554	0.125788	0.128157	0.127171	0.123189	0.131751
76.82		0.124768	0.125063	0.123818	0.126396	0.126421	0.127157	0.124541	0.123619	0.130038	0.128158	0.125247	0.128779	0.126077	0.124062	0.124489	0.123329	0.127095	0.124382	0.126395	0.124503	0.127015	0.125876	0.122026	0.130516
77.2222		0.123728	0.123845	0.122539	0.12535	0.12519	0.126142	0.123376	0.122472	0.128894	0.126846	0.124056	0.127563	0.124965	0.12302	0.12339	0.122224	0.125852	0.1232	0.125268	0.123193	0.125867	0.124612	0.120901	0.129283
77.6244		0.122702	0.122634	0.121279	0.124307	0.123923	0.125118	0.122203	0.12132	0.127693	0.125542	0.12288	0.126327	0.123867	0.121954	0.122295	0.121081	0.124628	0.121996	0.12417	0.121862	0.124717	0.12338	0.119812	0.128054
78.0266		0.121673	0.12142	0.120042	0.12325	0.122624	0.124077	0.121028	0.120161	0.126427	0.124252	0.121706	0.125074	0.122774	0.120862	0.121195	0.119902	0.123419	0.120769	0.123091	0.120511	0.123573	0.122179	0.118754	0.126828
78.4288		0.120622	0.120195	0.118836	0.122165	0.121305	0.123011	0.119859	0.118991	0.125099	0.122982	0.120521	0.123807	0.121675	0.119742	0.120079	0.11869	0.12222	0.119513	0.122021	0.119148	0.122442	0.121003	0.117719	0.125607
78.831		0.119531	0.11895	0.117669	0.121045	0.119985	0.121916	0.118699	0.117806	0.123724	0.121738	0.119314	0.122529	0.120557	0.118595	0.118941	0.117457	0.121021	0.118224	0.12095	0.117781	0.121325	0.119841	0.116701	0.124388
79.2332		0.118384	0.117684	0.116545	0.119885	0.118683	0.120786	0.117553	0.116605	0.122321	0.120525	0.118085	0.121241	0.11941	0.117424	0.117772	0.116215	0.119818	0.1169	0.119869	0.116421	0.120219	0.118681	0.115694	0.123169
79.6354		0.117177	0.116401	0.115464	0.118692	0.117415	0.11962	0.116421	0.115387	0.120914	0.119346	0.116842	0.119944	0.118223	0.116235	0.11657	0.114977	0.118608	0.115538	0.118776	0.11508	0.119113	0.117514	0.114697	0.121947
80.0376		0.115913	0.115115	0.114418	0.117475	0.116192	0.118413	0.1153	0.114157	0.119522	0.118198	0.115604	0.118644	0.116989	0.115036	0.115332	0.113751	0.117395	0.114144	0.117671	0.113771	0.117995	0.116335	0.113707	0.12072
80.4398		0.114607	0.113848	0.113389	0.116247	0.115016	0.117164	0.114185	0.112918	0.118158	0.117075	0.114397	0.117346	0.115706	0.113834	0.114058	0.11254	0.116188	0.112724	0.116558	0.112505	0.11685	0.115146	0.112725	0.119486
80.842		0.113282	0.112623	0.112353	0.115022	0.113881	0.115878	0.113073	0.11168	0.116829	0.115969	0.113243	0.11606	0.114376	0.112639	0.112754	0.111342	0.114999	0.111292	0.115441	0.11129	0.115668	0.113956	0.111748	0.118246
81.2442		0.111965	0.111462	0.111285	0.113808	0.112775	0.114563	0.111959	0.110446	0.115533	0.114869	0.112163	0.114798	0.113009	0.111456	0.111429	0.110149	0.11384	0.109866	0.114321	0.110132	0.114447	0.112782	0.110771	0.117001
81.6464		0.110685	0.110377	0.110164	0.112608	0.111682	0.113232	0.110843	0.109223	0.114267	0.113762	0.111159	0.113568	0.111623	0.11029	0.110099	0.108951	0.112723	0.108465	0.113198	0.109032	0.113196	0.111637	0.109785	0.115755
82.0485		0.109465	0.109366	0.108979	0.111418	0.110588	0.111906	0.109723	0.108014	0.11303	0.112644	0.110221	0.112372	0.110242	0.109141	0.108785	0.107734	0.111652	0.10711	0.112065	0.10799	0.111931	0.110534	0.10878	0.114514
82.4507		0.108319	0.10841	0.10773	0.110227	0.109481	0.110603	0.108601	0.106826	0.111823	0.111513	0.109321	0.111208	0.108893	0.108004	0.107509	0.106488	0.110627	0.105819	0.110918	0.106998	0.110671	0.109479	0.107745	0.113285
82.8529		0.107248	0.107475	0.106433	0.109019	0.108354	0.109338	0.107476	0.105663	0.110652	0.110372	0.108421	0.110067	0.107602	0.106877	0.106292	0.105207	0.109637	0.104605	0.109753	0.106046	0.109434	0.108468	0.106672	0.112073
83.2551		0.106244	0.106522	0.10511	0.10778	0.107203	0.108119	0.106348	0.104535	0.109526	0.109229	0.10748	0.108935	0.106391	0.105751	0.105146	0.103888	0.108667	0.103473	0.108565	0.105118	0.108228	0.107487	0.105555	0.110882
83.6573		0.105284	0.10551	0.103789	0.106495	0.10603	0.106942	0.105213	0.103448	0.10845	0.108099	0.106465	0.107798	0.10527	0.104621	0.104076	0.102534	0.107693	0.102417	0.107355	0.104196	0.107053	0.106513	0.104389	0.10971
84.0595		0.10434	0.10441	0.102491	0.105157	0.104837	0.105792	0.104064	0.102406	0.107421	0.106989	0.105351	0.106645	0.104236	0.10348	0.103072	0.101155	0.106691	0.101418	0.106127	0.103259	0.105895	0.105524	0.103175	0.108551
84.4617		0.10338	0.103209	0.101229	0.103768	0.103624	0.104646	0.102895	0.101409	0.106425	0.105906	0.104135	0.105471	0.103273	0.102316	0.102116	0.0997624	0.105637	0.100444	0.104882	0.102287	0.104738	0.104494	0.101914	0.107395
84.8639		0.102373	0.101914	0.100002	0.102334	0.102393	0.103482	0.101701	0.100442	0.105436	0.104847	0.102827	0.104274	0.102355	0.10112	0.101185	0.0983708	0.104511	0.0994624	0.103623	0.101268	0.10356	0.103406	0.10061	0.106225
85.2661		0.101297	0.100548	0.0987995	0.100873	0.101149	0.102278	0.100481	0.0994839	0.10442	0.1038	0.101455	0.103057	0.101452	0.099882	0.100256	0.0969943	0.103304	0.0984366	0.102352	0.1002	0.102346	0.10225	0.099273	0.105027
85.6683		0.100138	0.0991439	0.0976017	0.099401	0.099892	0.101028	0.0992433	0.0985062	0.103344	0.102744	0.100052	0.101822	0.100532	0.0985934	0.0993102	0.0956463	0.102012	0.0973393	0.101066	0.0990898	0.101089	0.10103	0.0979182	0.103787
86.0705		0.098895	0.0977377	0.0963929	0.0979361	0.0986263	0.0997309	0.0980035	0.0974799	0.10218	0.101649	0.0986568	0.100573	0.0995749	0.0972552	0.0983396	0.0943371	0.100645	0.0961559	0.0997623	0.0979563	0.099793	0.099753	0.0965672	0.102497
86.4727		0.0975758	0.0963602	0.095165	0.0964921	0.0973532	0.0983986	0.0967821	0.0963842	0.100917	0.100486	0.0973016	0.0993122	0.0985673	0.0958769	0.0973411	0.0930738	0.0992164	0.0948862	0.0984418	0.0968225	0.0984654	0.0984348	0.0952461	0.101161
86.8749		0.0961976	0.0950326	0.0939251	0.0950785	0.0960742	0.097045	0.095599	0.0952118	0.0995593	0.0992256	0.0960103	0.0980406	0.0975073	0.0944767	0.0963192	0.0918593	0.097745	0.0935423	0.0971058	0.0957122	0.0971208	0.0970929	0.0939805	0.0997917
87.2771		0.094781	0.0937658	0.092695	0.0936983	0.0947915	0.0956842	0.0944645	0.0939729	0.0981275	0.097849	0.0947945	0.0967596	0.0964021	0.093081	0.095279	0.0906922	0.096249	0.092146	0.0957594	0.0946398	0.0957703	0.0957439	0.0927888	0.0984087
87.6793		0.0933471	0.0925622	0.091506	0.0923499	0.093507	0.0943294	0.0933759	0.0926934	0.0966532	0.096354	0.0936504	0.0954716	0.0952593	0.0917165	0.0942261	0.0895688	0.0947451	0.0907214	0.0944104	0.0936079	0.0944224	0.0944032	0.0916761	0.0970387
88.0815		0.0919164	0.0914208	0.0903915	0.0910263	0.0922284	0.0929906	0.092315	0.0914075	0.0951734	0.0947564	0.0925609	0.0941753	0.0940862	0.0904058	0.093159	0.0884845	0.0932493	0.0892919	0.0930681	0.0926054	0.0930802	0.0930856	0.0906311	0.0957068
88.4837		0.0905063	0.0903373	0.089373	0.0897204	0.0909686	0.0916792	0.091251	0.0901508	0.0937228	0.0930963	0.0914966	0.0928706	0.0928851	0.0891637	0.0920747	0.0874328	0.0917787	0.0878786	0.0917407	0.091608	0.091743	0.0918058	0.0896276	0.0944314
88.8859		0.0891323	0.0893092	0.0884568	0.088426	0.0897451	0.0904068	0.0901541	0.0889502	0.0923301	0.0914297	0.0904223	0.0915541	0.0916551	0.0879921	0.0909644	0.0864092	0.0903537	0.0865008	0.090435	0.09059	0.090411	0.0905792	0.088631	0.0932219
89.2881		0.0878074	0.0883329	0.0876238	0.0871423	0.088579	0.0891905	0.0890032	0.0878209	0.0910178	0.0898259	0.0893032	0.0902224	0.0903938	0.0868809	0.0898194	0.0854106	0.0889993	0.0851764	0.0891552	0.0895295	0.0890855	0.0894227	0.0876081	0.0920778
89.6903		0.086541	0.087401	0.0868346	0.0858778	0.0874874	0.0880444	0.0877988	0.0867589	0.0897967	0.0883517	0.0881112	0.0888717	0.0891042	0.0858139	0.0886316	0.0844332	0.0877422	0.0839251	0.0879029	0.0884164	0.0877749	0.0883472	0.0865372	0.0909872
90.0925		0.085339	0.0865013	0.0860365	0.0846492	0.0864795	0.0869803	0.086568	0.0857502	0.0886723	0.0870617	0.0868363	0.0875052	0.0877976	0.0847696	0.0873983	0.0834756	0.0866065	0.0827642	0.0866747	0.0872566	0.0864935	0.0873555	0.0854141	0.0899361
90.4947		0.0841989	0.0856151	0.0851751	0.0834836	0.0855496	0.0859955	0.085356	0.0847719	0.0876396	0.0859835	0.0854862	0.0861318	0.0864931	0.0837288	0.0861201	0.0825325	0.0856066	0.0817084	0.085468	0.0860731	0.08526	0.0864358	0.0842534	0.0889069
90.8969		0.0831102	0.0847186	0.0842087	0.0824101	0.0846786	0.0850728	0.0842175	0.0837989	0.0866852	0.0851101	0.0840871	0.084769	0.0852161	0.0826756	0.0848048	0.0815986	0.0847418	0.0807622	0.0842801	0.084894	0.0840925	0.0855585	0.0830831	0.0878853
91.2991		0.0820507	0.0837871	0.083115	0.0814545	0.0838371	0.0841798	0.0831962	0.0828081	0.0857876	0.0844008	0.0826786	0.0834409	0.083993	0.0816017	0.0834618	0.0806654	0.0839934	0.0799205	0.0831086	0.0837454	0.0830081	0.0846777	0.0819345	0.086861
91.7013		0.0809936	0.0828014	0.0818997	0.0806304	0.0829937	0.0832756	0.08231	0.0817842	0.084918	0.0837876	0.0813027	0.0821736	0.0828412	0.0805009	0.0821018	0.079724	0.0833273	0.0791645	0.0819548	0.0826402	0.0820124	0.0837408	0.0808307	0.08583
92.1035		0.0799077	0.0817504	0.0805911	0.0799306	0.0821216	0.082319	0.0815421	0.0807182	0.0840436	0.0831858	0.0799942	0.0809902	0.0817648	0.0793734	0.0807328	0.0787672	0.0827005	0.0784658	0.0808214	0.0815726	0.0810978	0.0826992	0.079777	0.084788
92.5057		0.0787682	0.0806392	0.0792331	0.0793248	0.0812097	0.0812819	0.0808409	0.0796069	0.0831342	0.0825129	0.0787698	0.0799071	0.0807517	0.0782175	0.0793584	0.0777894	0.0820695	0.0777896	0.0797132	0.0805149	0.0802429	0.0815209	0.0787567	0.0837333
92.9079		0.0775636	0.0794866	0.077875	0.0787617	0.0802585	0.0801572	0.0801302	0.078452	0.0821655	0.0817018	0.0776328	0.0789263	0.0797757	0.077032	0.0779766	0.076794	0.0813984	0.0771014	0.0786323	0.0794269	0.0794143	0.0802019	0.077734	0.0826609
93.3101		0.0762982	0.078322	0.0765548	0.0781752	0.0792753	0.0789574	0.0793283	0.0772584	0.0811215	0.0807081	0.0765698	0.0780357	0.0788024	0.0758146	0.0765826	0.0757862	0.0806636	0.0763635	0.0775762	0.078266	0.0785735	0.0787646	0.0766633	0.0815631
93.7123		0.0749953	0.0771781	0.0752997	0.0774973	0.0782654	0.0777122	0.0783649	0.0760334	0.0799965	0.0795166	0.0755641	0.0772097	0.0777981	0.0745635	0.0751696	0.0747758	0.0798549	0.0755399	0.076531	0.0770007	0.0776833	0.0772575	0.075504	0.080432
94.1145		0.0736866	0.0760812	0.0741154	0.0766699	0.0772253	0.0764569	0.0772008	0.0747895	0.078793	0.0781386	0.0745985	0.0764082	0.0767361	0.0732803	0.0737362	0.0737742	0.0789716	0.0745964	0.0754771	0.0756221	0.0767183	0.0757365	0.0742345	0.0792619
94.5167		0.0724083	0.0750442	0.0729928	0.0756544	0.0761387	0.0752193	0.075835	0.0735422	0.0775221	0.0766092	0.0736633	0.0755862	0.075604	0.0719711	0.072288	0.0727893	0.0780183	0.073502	0.0743862	0.0741513	0.0756681	0.0742561	0.072864	0.0780543
94.9189		0.0711885	0.0740594	0.0719142	0.0744338	0.0749798	0.074011	0.0743101	0.0723116	0.0762002	0.0749777	0.0727531	0.0747048	0.0744033	0.0706484	0.0708381	0.0718287	0.0769995	0.0722389	0.073232	0.0726331	0.0745409	0.0728504	0.0714359	0.0768221
95.3211		0.0700411	0.0731022	0.0708642	0.0730182	0.0737254	0.0728219	0.0727009	0.0711214	0.0748542	0.0733061	0.0718615	0.0737387	0.0731502	0.0693302	0.0694127	0.0708976	0.0759163	0.0708132	0.071997	0.0711324	0.0733586	0.0715317	0.0700217	0.0755873
95.7233		0.0689621	0.0721363	0.0698363	0.0714361	0.072364	0.0716291	0.0710998	0.0699917	0.0735162	0.0716593	0.0709708	0.0726898	0.0718717	0.0680398	0.0680466	0.0700034	0.0747641	0.0692643	0.0706822	0.0697152	0.0721492	0.0702917	0.0687061	0.0743826
96.1255		0.0679352	0.0711246	0.0688382	0.069731	0.0709045	0.0704006	0.0695978	0.0689371	0.072225	0.0701001	0.0700533	0.0715831	0.0705999	0.0667992	0.0667793	0.0691591	0.0735328	0.0676711	0.0693134	0.0684376	0.070937	0.0691072	0.0675668	0.0732426
96.5277		0.0669349	0.0700404	0.0678941	0.0679584	0.0693777	0.0691137	0.0682633	0.0679567	0.0710131	0.0686788	0.0690677	0.0704668	0.069364	0.0656232	0.0656494	0.0683807	0.0722078	0.0661429	0.0679374	0.0673262	0.0697354	0.0679554	0.0666532	0.0721945
96.9299		0.0659391	0.0688741	0.0670289	0.0661814	0.0678226	0.0677642	0.0671311	0.0670358	0.069901	0.0674266	0.0679742	0.0693875	0.0681878	0.0645152	0.064685	0.0676872	0.0707729	0.0647968	0.0666138	0.0663781	0.0685417	0.0668259	0.0659704	0.0712485
97.3321		0.0649321	0.0676363	0.0662626	0.064463	0.0662769	0.066373	0.0661939	0.0661385	0.0688837	0.0663487	0.0667515	0.0683731	0.067083	0.0634642	0.0638929	0.0670881	0.0692143	0.0637267	0.0654062	0.0655536	0.0673402	0.065721	0.0654735	0.0703894
97.7343		0.0639138	0.0663491	0.0655968	0.0628607	0.0647654	0.0649851	0.0654077	0.0652165	0.0679248	0.0654244	0.0654114	0.0674155	0.0660525	0.0624484	0.0632498	0.0665746	0.0675268	0.0629728	0.0643634	0.0647883	0.0661092	0.0646534	0.0650736	0.0695762
98.1365		0.0628972	0.0650356	0.0650117	0.0614118	0.063294	0.0636611	0.0647034	0.0642178	0.0669672	0.0646062	0.0640041	0.0664671	0.0650857	0.0614394	0.0626977	0.066112	0.0657204	0.0625104	0.0635086	0.0640054	0.0648301	0.0636399	0.0646552	0.0687464
98.5387		0.061906	0.063708	0.064472	0.0601283	0.0618582	0.0624614	0.0640068	0.0631039	0.0659469	0.0638367	0.0626154	0.0654568	0.0641666	0.060414	0.0621502	0.0656367	0.0638262	0.0622475	0.0628366	0.0631365	0.0634909	0.0626871	0.0641004	0.067831
98.9409		0.0609641	0.0623598	0.063937	0.0589916	0.0604533	0.0614323	0.0632602	0.0618591	0.064823	0.0630515	0.061342	0.0643174	0.0632731	0.0593602	0.0614997	0.0650656	0.0618975	0.0620565	0.0623141	0.0621376	0.0620921	0.0617881	0.0633123	0.0667715
99.3431		0.0600917	0.0609753	0.063376	0.0579564	0.0590884	0.0605898	0.0624314	0.0605027	0.0635916	0.0621971	0.0602672	0.0630098	0.0623771	0.0582868	0.0606482	0.0643158	0.0600062	0.0618	0.0618842	0.0610049	0.0606467	0.060925	0.0622334	0.0655391
99.7453		0.0592958	0.0595344	0.0627824	0.0569661	0.0577895	0.0599054	0.0615219	0.0590912	0.0622968	0.0612305	0.0594341	0.0615538	0.0614515	0.0572197	0.0595229	0.0633258	0.0582324	0.0613632	0.0614808	0.0597698	0.0591705	0.0600769	0.0608531	0.0641367
100.147		0.0585656	0.0580354	0.0621686	0.0559678	0.0565895	0.0593089	0.0605604	0.0577042	0.0610159	0.0601276	0.0588273	0.0600152	0.0604634	0.0561917	0.0581093	0.06208	0.0566501	0.0606667	0.0610378	0.0584965	0.057681	0.0592324	0.0592053	0.0626115
100.55		0.0578748	0.0565058	0.0615613	0.0549342	0.0555201	0.0586992	0.0595867	0.0564282	0.0598353	0.0588822	0.058373	0.0584946	0.0593825	0.0552388	0.056452	0.0606134	0.0553138	0.059674	0.060496	0.0572563	0.0561966	0.0583955	0.0573585	0.0610391
100.952		0.0571817	0.0550026	0.060976	0.0538666	0.0545916	0.0579639	0.0586377	0.055336	0.0588155	0.0575104	0.057951	0.0570898	0.0581816	0.0543778	0.0546643	0.0590138	0.0542494	0.0583847	0.0598136	0.0561075	0.0547319	0.0575924	0.0554023	0.0595147
101.354		0.0564425	0.053603	0.0603995	0.0528026	0.0537848	0.0570043	0.0577304	0.0544598	0.0579735	0.0560411	0.0574287	0.05586	0.0568496	0.0535983	0.0528968	0.0574039	0.0534525	0.0568265	0.058959	0.0550781	0.0533059	0.0568527	0.0534339	0.0581329
101.756		0.0556212	0.0523764	0.0597831	0.0517994	0.053052	0.0557744	0.0568591	0.053781	0.0572693	0.0545317	0.0566837	0.0548057	0.055391	0.0528576	0.0513125	0.0559097	0.0528919	0.0550464	0.0579186	0.0541575	0.051941	0.0562022	0.0515464	0.0569781
102.158		0.054704	0.0513646	0.0590524	0.0509146	0.0523307	0.0542911	0.0559974	0.0532337	0.0566296	0.0530522	0.0556391	0.0538677	0.0538412	0.0520902	0.0500448	0.0546351	0.0525184	0.0531225	0.0566859	0.0533053	0.0506743	0.0556428	0.0498203	0.0561069
102.561		0.053702	0.0505698	0.0581357	0.0501927	0.0515685	0.0526527	0.0551058	0.0527228	0.0559696	0.0516958	0.0542844	0.0529516	0.0522536	0.0512247	0.0491776	0.0536347	0.0522729	0.0511607	0.0552728	0.0524726	0.0495529	0.0551504	0.0483168	0.0555396
102.963		0.0526554	0.0499501	0.0570041	0.0496491	0.0507336	0.051014	0.0541475	0.0521455	0.0552242	0.0505516	0.0526822	0.0519641	0.0507006	0.0502131	0.0487194	0.0528986	0.0520931	0.0492997	0.0537038	0.0516312	0.0486432	0.0546686	0.0470751	0.0552502
103.365		0.0516164	0.0494437	0.055689	0.0492702	0.0498409	0.0495606	0.0531056	0.0514326	0.0543758	0.0497048	0.0509644	0.0508452	0.0492525	0.0490568	0.0486122	0.0523643	0.051916	0.0476964	0.052035	0.0507852	0.04802	0.054132	0.0461107	0.0551711
103.767		0.0506368	0.0489898	0.0542795	0.0490236	0.0489348	0.0484485	0.0519828	0.0505659	0.053451	0.0492019	0.0492995	0.0495945	0.0479691	0.0478145	0.0487326	0.051927	0.0516781	0.0464976	0.0503469	0.0499716	0.0477551	0.0534752	0.0454166	0.0551923
104.169		0.0497555	0.0485513	0.0528902	0.0488734	0.04809	0.0477654	0.0508177	0.0495992	0.0525091	0.0490454	0.0478581	0.0482597	0.0468767	0.046597	0.0489175	0.0514777	0.0513171	0.0458016	0.0487515	0.0492472	0.047896	0.0526677	0.0449675	0.0551786
104.572		0.0489839	0.0481163	0.0516177	0.0487861	0.0473805	0.0474971	0.0496662	0.0486344	0.0516161	0.0491751	0.0467591	0.0469232	0.0459767	0.0455401	0.0489893	0.050922	0.0507758	0.0456282	0.0473681	0.048652	0.0484459	0.0517128	0.0447254	0.0549915
104.974		0.0483062	0.0476971	0.0504945	0.0487375	0.046859	0.0475302	0.0485977	0.0478013	0.0508156	0.0494802	0.046043	0.0456696	0.0452478	0.0447537	0.0487909	0.0502018	0.0500127	0.045893	0.0463056	0.0481865	0.0493452	0.0506585	0.044647	0.0545246
105.376		0.0476864	0.0473009	0.0494802	0.0486986	0.046552	0.0476788	0.0476681	0.0472198	0.0501219	0.0498084	0.0456575	0.0445599	0.0446652	0.0442921	0.0482086	0.0493032	0.0490173	0.0464256	0.0456269	0.0477964	0.0504603	0.0495819	0.0446893	0.0537278
105.778		0.0470773	0.046913	0.0484741	0.0486292	0.0464545	0.0477406	0.0469021	0.0469509	0.0495143	0.0499979	0.0454723	0.0436273	0.044213	0.0441198	0.0472111	0.0482456	0.0478244	0.0470017	0.0453268	0.047382	0.0515966	0.0485714	0.044815	0.0526305
106.18		0.0464284	0.046494	0.047377	0.0484664	0.0465398	0.0475386	0.0462871	0.0469776	0.048956	0.0499099	0.0453207	0.0428771	0.0438828	0.0441239	0.0458532	0.0470559	0.0465233	0.0474144	0.045321	0.0468317	0.0525269	0.0477063	0.0449928	0.0513396
106.583		0.0457017	0.0459801	0.0461405	0.0481267	0.0467774	0.0469728	0.0457623	0.0471884	0.0484031	0.0494502	0.0450433	0.0423057	0.0436749	0.0441482	0.044276	0.0457657	0.0452533	0.0475302	0.0454698	0.0460722	0.0530394	0.0470393	0.045196	0.0500188
106.985		0.0448817	0.0453118	0.0448227	0.0475174	0.0471271	0.0460276	0.0452484	0.0474048	0.0478282	0.0486092	0.0445362	0.0419068	0.0435719	0.044038	0.0426935	0.044392	0.044183	0.0473252	0.045598	0.0451074	0.0529824	0.0465912	0.0453976	0.0488572
107.387		0.0439764	0.0444486	0.0435789	0.0465769	0.0475399	0.0447674	0.0446645	0.0474202	0.0472225	0.0474459	0.0437827	0.0416803	0.0435297	0.0436911	0.041338	0.0429409	0.0434721	0.0468855	0.0455464	0.0440446	0.052318	0.0463502	0.0455628	0.0480127
107.789		0.0430336	0.0433827	0.0426277	0.0452932	0.0479564	0.0433084	0.0439655	0.0470589	0.046598	0.0461044	0.0428612	0.0416184	0.0434626	0.0430809	0.0404335	0.0414107	0.0432207	0.0463605	0.0452086	0.0430707	0.0511315	0.0462738	0.0456424	0.0475744
108.191		0.0421381	0.0421349	0.042174	0.0437274	0.0482793	0.0417831	0.0431467	0.046225	0.0459889	0.0447656	0.0419327	0.0416974	0.0432692	0.0422557	0.0401389	0.0398188	0.0434186	0.04591	0.0445455	0.0424022	0.0496312	0.0463106	0.045568	0.0475279
108.594		0.0413936	0.0407516	0.0423365	0.0420165	0.0483843	0.040309	0.0422606	0.0449359	0.0454282	0.0436083	0.0411941	0.0418514	0.0428506	0.041305	0.0405207	0.038207	0.0439153	0.0456448	0.0435894	0.0421893	0.048102	0.0463965	0.0452562	0.0477483
108.996		0.0409032	0.039277	0.0430979	0.0403496	0.0481332	0.0389728	0.0413821	0.0433195	0.0449641	0.0427642	0.0408136	0.0419791	0.0421465	0.0403184	0.0415237	0.0366506	0.0444308	0.0455953	0.0424127	0.0424555	0.0468442	0.046475	0.0446225	0.0480268
109.398		0.0407442	0.037766	0.0442773	0.0389195	0.0474038	0.0378142	0.0405829	0.0415935	0.0446221	0.0422936	0.0408734	0.0419498	0.0411541	0.0393504	0.0429668	0.0352686	0.044618	0.0457022	0.0411192	0.0430528	0.0461141	0.0465113	0.0436074	0.048132
109.8		0.0409231	0.0362726	0.0455844	0.0378884	0.0461259	0.0368444	0.039886	0.0399953	0.0444009	0.0421722	0.0413331	0.0416409	0.0399419	0.038398	0.0445583	0.0341889	0.0441613	0.0458544	0.0398256	0.0437028	0.0460613	0.0464667	0.0422068	0.0478727
110.202		0.0413921	0.0348801	0.0467004	0.0373323	0.0443391	0.03604	0.0392401	0.0387319	0.0442489	0.0423274	0.0420349	0.0409785	0.0386132	0.0374117	0.0459578	0.0335417	0.0428756	0.0459238	0.0386573	0.0440602	0.0467039	0.0463037	0.0404961	0.0471489
110.605		0.0420341	0.033681	0.047354	0.0372323	0.0421731	0.0353713	0.0385434	0.0379349	0.0440613	0.0426561	0.0427361	0.0399707	0.0372912	0.0363175	0.0468526	0.0334134	0.0407653	0.0458308	0.0377478	0.0438308	0.0478894	0.0459682	0.0386369	0.0459718
111.007		0.0426954	0.0327877	0.0473961	0.0374594	0.0398675	0.0348188	0.0376732	0.0376441	0.0436789	0.0430721	0.043193	0.0387254	0.0360775	0.0350619	0.0470466	0.0338162	0.038021	0.045564	0.0372167	0.0428533	0.0493381	0.0453889	0.0368557	0.0444524
111.409		0.0432156	0.0322871	0.0468142	0.0377895	0.0377142	0.0343744	0.0365612	0.037799	0.0429407	0.0434964	0.0432144	0.0374373	0.0350302	0.0336371	0.0465181	0.0346915	0.0349634	0.0451918	0.0371546	0.0411482	0.0506883	0.0444856	0.0353943	0.0427461
111.811		0.0434713	0.0322199	0.0457149	0.0379605	0.0360016	0.0340639	0.0352225	0.0382673	0.0417226	0.0438625	0.0427244	0.0363204	0.0341726	0.0321068	0.0454434	0.0358932	0.0319598	0.044822	0.037567	0.038912	0.0515767	0.0431934	0.0344393	0.0410369
112.213		0.0434112	0.0325452	0.0442765	0.037745	0.0349432	0.0339288	0.0338	0.0388736	0.040014	0.0440597	0.0417656	0.0355558	0.0334862	0.030603	0.0441009	0.0372412	0.0293405	0.044574	0.0383621	0.0364606	0.051745	0.0415147	0.0340536	0.0394572
112.616		0.0430641	0.0331325	0.0427158	0.0370236	0.0346372	0.0340255	0.0324969	0.0394117	0.0379253	0.0439174	0.0404731	0.0352022	0.0329382	0.0293099	0.0428071	0.0385482	0.0273321	0.0444981	0.0393374	0.0341284	0.0511141	0.0395363	0.0341408	0.0380922
113.018		0.042534	0.0337789	0.0412557	0.035835	0.0350258	0.0343899	0.0315341	0.0396873	0.0356906	0.0432215	0.0390338	0.0351788	0.0324925	0.0284314	0.0417929	0.0396638	0.0260187	0.044581	0.0402219	0.0321776	0.0497663	0.0374487	0.0344667	0.0369465
113.42		0.0419518	0.0342257	0.040092	0.0343508	0.0359202	0.0350114	0.0310428	0.0395475	0.0335799	0.0417504	0.0376294	0.0352621	0.0321187	0.0281359	0.0411491	0.0405177	0.025335	0.0447246	0.0407634	0.0307449	0.0479192	0.0354784	0.0347351	0.0359635
113.822		0.0414159	0.0342267	0.0393868	0.0328322	0.0370084	0.0358027	0.0310254	0.0388888	0.03184	0.0393517	0.0363905	0.0351567	0.0317877	0.0285267	0.0408117	0.0411018	0.0250963	0.0447649	0.0407901	0.0298232	0.0458085	0.0338194	0.0346904	0.0350421
114.224		0.0410001	0.0335757	0.0392468	0.0315153	0.0379358	0.0366172	0.031344	0.0377222	0.0306051	0.036012	0.0353399	0.0345985	0.0314743	0.0296028	0.0406007	0.0414614	0.0250618	0.044532	0.040271	0.0293004	0.0436097	0.0325596	0.0342017	0.0340808
114.627		0.0407174	0.0321442	0.0397035	0.0305615	0.0383649	0.0372692	0.0317569	0.0361338	0.0298758	0.0319134	0.0344032	0.0334263	0.0311424	0.0312362	0.0402823	0.0416334	0.0250144	0.0438616	0.0393151	0.0290056	0.0413466	0.0316452	0.0333023	0.0330039
115.029		0.0405732	0.0299123	0.0407145	0.0300036	0.0380262	0.0375619	0.0319902	0.034289	0.0294967	0.0274376	0.0334275	0.0316572	0.0307518	0.0331848	0.039692	0.0415984	0.024826	0.0426367	0.0381506	0.0287659	0.0389122	0.0308914	0.0321761	0.0317903
115.431		0.0405861	0.026988	0.042182	0.0297509	0.0367822	0.0373453	0.0318059	0.0323732	0.0291839	0.0231293	0.0322106	0.0294647	0.0302631	0.0351207	0.038785	0.0412445	0.0244857	0.0408178	0.0370283	0.0284254	0.0361071	0.0300592	0.0310999	0.0304909
115.833		0.0407758	0.023641	0.0439371	0.029644	0.0346494	0.0365343	0.0310424	0.0305688	0.0286097	0.0195895	0.0306024	0.02714	0.0296418	0.0366716	0.0376969	0.0403747	0.0240812	0.0384383	0.0361338	0.0278908	0.032759	0.028951	0.0303575	0.0292174
116.235		0.0411724	0.0202965	0.0457691	0.0295152	0.0317935	0.0351821	0.0296556	0.0289831	0.0274984	0.0173195	0.0285712	0.0249899	0.0288748	0.0375627	0.0367034	0.038773	0.0237507	0.035626	0.035504	0.027159	0.0288648	0.0274843	0.0301405	0.0281289
116.638		0.0417637	0.0174777	0.0474149	0.0292832	0.0284834	0.0334448	0.0276981	0.0276584	0.0257689	0.0165686	0.0262388	0.0232673	0.027959	0.0376907	0.0361202	0.0363252	0.0236251	0.0325993	0.034991	0.0263062	0.0246727	0.0257651	0.0304591	0.0273509
117.04		0.0424693	0.0156914	0.0485642	0.0289525	0.0250474	0.0315958	0.0252647	0.0265146	0.0235916	0.0172558	0.0238871	0.0221066	0.0269096	0.0372284	0.0362029	0.0331497	0.0237794	0.0296511	0.0342977	0.0254755	0.0206179	0.0240289	0.031097	0.0269389
117.442		0.043151	0.0152653	0.048874	0.0286176	0.0217953	0.0299072	0.0224906	0.0253902	0.0213142	0.0189613	0.0218385	0.0214949	0.0257299	0.0365808	0.036994	0.029635	0.0242038	0.0270679	0.0330821	0.0247895	0.017211	0.0225561	0.0316433	0.0267896
117.844		0.0435797	0.0162076	0.0479542	0.0283455	0.0189979	0.0285743	0.0195144	0.0240842	0.019305	0.0210561	0.0203503	0.0212899	0.0244165	0.0362149	0.0383025	0.0263169	0.0248017	0.0250975	0.031076	0.0242687	0.0148163	0.0215371	0.0316097	0.0266124
118.246		0.0435374	0.0181778	0.0454642	0.0280972	0.0168695	0.0276956	0.0165115	0.0224406	0.0178377	0.0228273	0.0195365	0.0212682	0.0229318	0.0365222	0.0397019	0.023665	0.0254125	0.0238319	0.0282004	0.0238309	0.0135685	0.0209579	0.0305892	0.0259832
118.649		0.0428157	0.0205766	0.0411947	0.02769	0.0155823	0.0272898	0.0136982	0.0204332	0.0169706	0.0236763	0.0193049	0.021167	0.0212205	0.0376208	0.0406446	0.0219214	0.025854	0.0231832	0.0246019	0.0233154	0.013329	0.0205713	0.0283922	0.0244383
119.051		0.041289	0.0227293	0.0352339	0.0268024	0.0152384	0.0273509	0.0113186	0.0182295	0.0166219	0.0232355	0.0194169	0.0207912	0.019221	0.0392746	0.0405751	0.0210445	0.025962	0.0229094	0.0205762	0.0225837	0.0137674	0.0200379	0.0251143	0.0216455
119.453		0.0389296	0.024115	0.0280547	0.0250936	0.0158515	0.0278602	0.00959329	0.0161477	0.0165825	0.0215488	0.0195094	0.0200412	0.01691	0.0407695	0.0391144	0.0208263	0.0256104	0.022715	0.0165202	0.0216282	0.014537	0.0191184	0.0211367	0.0176468
119.855		0.0358193	0.0244895	0.0204508	0.0223867	0.0172906	0.0288185	0.00867981	0.014609	0.0166348	0.019052	0.0191668	0.0189758	0.0143793	0.0410228	0.0362114	0.0209829	0.0247073	0.0223758	0.0127635	0.0206265	0.015472	0.0178619	0.0170802	0.0129857
120.257		0.0321248	0.0239089	0.013339	0.0187703	0.0193149	0.0302201	0.00865364	0.0139683	0.0166267	0.0165485	0.0180824	0.0177847	0.0119356	0.0388074	0.0321728	0.021306	0.0231945	0.0218378	0.00956175	0.0200032	0.0167238	0.0167163	0.0137135	0.00865962
