# Supplementary material
Source: MDPI journal article supplement (https://www.mdpi.com/2073-4441/13/11/1475)
Supplement: s1 [file s1 › Supplementary files/S2_1_24052018_File.xls]

## Sheet: Refraction
	Sample No.	1	2	3	4	5	6	7	8	9	10	11	12	13	14	15	16	17	18	19	20	21	22	23	24	25	26	27	28	29	30	31	32	33	34	35	36	37	38	39	40	41	42	43	44	45	46	47	48
	Preparation	LYD	LYD	EUF	EUF	EUF	EUF	ANLG	ANLG	LYD	LYD	EUF	EUF	LYD	ANLG	LYD	HC	HC	LYD	ANLG	ANLG	EUF	HC	HC	ANLG	LYD	ANLG	ANLG	HC	EUF	ANLG	EUF	LYD	HC	LYD	EUF	HC	LYD	ANLG	ANLG	EUF	HC	EUF	HC	HC	LYD	HC	HC	ANLG
Wavelength, cm-1		Refractive Index
1.2066		4.20406	4.03063	4.20293	4.15219	4.30243	4.25497	3.92597	4.11976	4.14148	4.35974	4.29715	4.12921	4.17123	4.20289	4.24296	4.11807	4.17373	4.23686	3.81941	4.30439	4.10134	4.40534	4.27318	3.96569	4.18471	4.2549	4.16409	4.22936	4.04119	4.07107	4.02795	4.2345	4.2519	4.58502	4.39226	4.21229	4.54328	4.02308	4.22199	4.01248	4.12185	4.47165	3.98786	4.16692	4.00039	3.95678	4.29058	4.01847
1.60879		3.66534	3.58673	3.72022	3.65375	3.73876	3.69545	3.47505	3.60161	3.59456	3.76084	3.71066	3.62734	3.65601	3.67053	3.72676	3.59651	3.64617	3.68446	3.42336	3.73647	3.58104	3.77399	3.7068	3.5104	3.67346	3.71002	3.65462	3.70715	3.5867	3.57952	3.539	3.71061	3.72518	3.88684	3.75832	3.68813	3.88673	3.56076	3.71384	3.52091	3.63565	3.80523	3.50927	3.66651	3.51481	3.52764	3.72882	3.56451
2.01099		3.36113	3.32478	3.43104	3.361	3.42365	3.38022	3.21764	3.31063	3.29633	3.42309	3.37879	3.33653	3.35827	3.36442	3.42386	3.30858	3.34872	3.37394	3.19918	3.40887	3.2955	3.42042	3.38769	3.24645	3.37964	3.39355	3.35881	3.40223	3.31902	3.29584	3.2644	3.40663	3.4176	3.49257	3.40894	3.3832	3.52138	3.294	3.42122	3.24981	3.35369	3.44163	3.23794	3.37314	3.24854	3.27639	3.4029	3.29726
2.41319		3.16981	3.1554	3.24119	3.17175	3.22603	3.18277	3.05641	3.12953	3.11571	3.21072	3.17308	3.15084	3.16937	3.17201	3.2303	3.13151	3.16209	3.17995	3.05764	3.20214	3.1213	3.20137	3.18819	3.07881	3.19122	3.19263	3.1707	3.20735	3.14648	3.11612	3.09358	3.2127	3.22121	3.24898	3.19573	3.18922	3.29434	3.12486	3.2324	3.0832	3.17244	3.22115	3.06944	3.18487	3.0871	3.11375	3.19605	3.12434
2.81539		3.039	3.0377	3.10744	3.03995	3.09097	3.04865	2.94774	3.00734	2.99691	3.06538	3.03579	3.02301	3.04033	3.04198	3.09759	3.0133	3.0351	3.0484	2.96057	3.06194	3.00589	3.05438	3.05298	2.96442	3.05993	3.05564	3.04213	3.07344	3.02698	2.99352	2.97852	3.07934	3.08645	3.08707	3.05478	3.05674	3.14086	3.00928	3.09991	2.97198	3.04609	3.07596	2.95679	3.0552	2.98148	3	3.05506	3.00399
3.21759		2.94408	2.95166	3.00851	2.94326	2.99297	2.95227	2.87054	2.91996	2.91378	2.95972	2.93893	2.93025	2.94738	2.94923	3.00173	2.92961	2.94378	2.95388	2.8901	2.96171	2.92462	2.9499	2.95593	2.8823	2.96313	2.95731	2.94959	2.97644	2.93984	2.90532	2.89651	2.98255	2.98898	2.97337	2.95596	2.96154	3.03068	2.92592	3.00167	2.89321	2.95274	2.97429	2.87719	2.9614	2.90863	2.9161	2.95394	2.91593
3.61979		2.87242	2.8866	2.93302	2.86985	2.919	2.8805	2.81369	2.855	2.85294	2.8797	2.8678	2.86058	2.87798	2.88051	2.92987	2.86793	2.8758	2.88329	2.8371	2.88742	2.86484	2.8727	2.88356	2.82129	2.88916	2.88416	2.88061	2.90358	2.87408	2.83952	2.83586	2.90965	2.91583	2.89027	2.8838	2.89077	2.94825	2.86354	2.92634	2.8351	2.88103	2.89988	2.81867	2.89134	2.85669	2.85208	2.87885	2.84938
4.02199		2.81696	2.83639	2.87428	2.8129	2.86178	2.82599	2.77091	2.80553	2.80704	2.81757	2.81412	2.80713	2.82497	2.82825	2.87463	2.82131	2.82427	2.82936	2.7965	2.83104	2.81953	2.81429	2.82837	2.775	2.83147	2.82847	2.82804	2.84749	2.82335	2.78927	2.79003	2.85342	2.85957	2.82781	2.82969	2.83701	2.88492	2.81576	2.86754	2.7911	2.82456	2.84371	2.77445	2.838	2.81904	2.80223	2.82185	2.79815
4.42418		2.77345	2.79721	2.82808	2.76821	2.81692	2.78431	2.73836	2.76742	2.77178	2.76868	2.77292	2.7657	2.78396	2.78788	2.83148	2.78557	2.78498	2.7877	2.76525	2.78766	2.78455	2.76962	2.78585	2.73946	2.78607	2.78545	2.78747	2.80367	2.78376	2.75037	2.75514	2.80945	2.81562	2.78002	2.78852	2.7957	2.83548	2.7787	2.8213	2.75729	2.77944	2.8005	2.7405	2.79702	2.79172	2.76301	2.77803	2.75836
4.82638		2.73918	2.76655	2.79158	2.73298	2.78159	2.75258	2.71361	2.73805	2.74452	2.7301	2.74106	2.73355	2.75212	2.75644	2.79748	2.75807	2.7552	2.75552	2.74138	2.75412	2.75734	2.7355	2.75309	2.71209	2.75035	2.752	2.75601	2.76916	2.75273	2.72009	2.7287	2.77485	2.78101	2.74311	2.75709	2.76384	2.79661	2.74984	2.78499	2.73121	2.74317	2.76697	2.71424	2.76548	2.77215	2.73209	2.74416	2.72745
5.22858		2.71234	2.74266	2.76277	2.70528	2.75389	2.7288	2.69501	2.71565	2.72356	2.6999	2.71649	2.70877	2.7275	2.73201	2.77066	2.73705	2.73303	2.73091	2.72352	2.72827	2.73621	2.70978	2.72814	2.6911	2.72248	2.726	2.7317	2.74195	2.7285	2.6966	2.70905	2.74767	2.75371	2.71459	2.73326	2.73939	2.7661	2.7275	2.75675	2.71126	2.7141	2.741	2.69402	2.74136	2.75859	2.70783	2.71806	2.70363
5.63078		2.69165	2.72429	2.74015	2.68371	2.73243	2.71152	2.68144	2.69895	2.70778	2.67673	2.69779	2.68999	2.70872	2.71321	2.7496	2.72129	2.71705	2.71253	2.71066	2.7086	2.72005	2.69095	2.70957	2.67524	2.70116	2.70596	2.7131	2.72059	2.70979	2.67858	2.69499	2.72652	2.73229	2.69274	2.71552	2.72088	2.74237	2.71047	2.73519	2.69632	2.69106	2.72115	2.67869	2.72321	2.74974	2.68907	2.69816	2.68559
6.03298		2.67616	2.7105	2.7226	2.66722	2.7162	2.69959	2.67207	2.687	2.69634	2.65962	2.68392	2.67619	2.69475	2.69907	2.73326	2.7099	2.70615	2.69934	2.70194	2.69399	2.70803	2.67786	2.69632	2.66357	2.68539	2.69078	2.69917	2.70403	2.69563	2.66509	2.6856	2.71037	2.71567	2.67632	2.70277	2.70722	2.72425	2.69786	2.71925	2.68561	2.67322	2.70639	2.66743	2.70992	2.74456	2.67492	2.68328	2.67236
6.43518		2.66514	2.70051	2.70922	2.65495	2.70439	2.69205	2.66626	2.67899	2.6886	2.64782	2.67411	2.66652	2.68478	2.68885	2.72083	2.70221	2.69935	2.6905	2.69662	2.68358	2.69955	2.66955	2.68748	2.65536	2.67434	2.67962	2.68908	2.69144	2.68525	2.65539	2.6801	2.69843	2.70303	2.66438	2.69409	2.69758	2.71085	2.68897	2.70802	2.6785	2.65995	2.69594	2.65963	2.70064	2.74211	2.66469	2.67255	2.66315
6.83738		2.65794	2.6937	2.69928	2.64622	2.6963	2.68796	2.66349	2.67416	2.68401	2.64065	2.6677	2.66029	2.67814	2.68194	2.71161	2.69763	2.69575	2.68522	2.6939	2.67665	2.69408	2.66517	2.68223	2.65002	2.66727	2.67181	2.68214	2.68213	2.67798	2.64886	2.67772	2.69002	2.6937	2.65616	2.68866	2.69126	2.70141	2.6832	2.7007	2.67449	2.65074	2.68916	2.65474	2.69467	2.74149	2.65779	2.66522	2.65731
7.23958		2.65386	2.68948	2.6921	2.64036	2.69128	2.68641	2.66324	2.67172	2.682	2.63741	2.66408	2.65682	2.67419	2.67778	2.70497	2.6956	2.69439	2.68268	2.69295	2.67254	2.69109	2.66379	2.67971	2.647	2.66341	2.66675	2.67772	2.6755	2.67319	2.64495	2.67763	2.6845	2.68704	2.65096	2.68562	2.68762	2.69523	2.67998	2.69645	2.67305	2.64505	2.68543	2.65226	2.69139	2.7417	2.65363	2.66065	2.65421
7.64178		2.65213	2.68725	2.68704	2.63674	2.68863	2.68637	2.66494	2.67075	2.68194	2.63724	2.66262	2.65543	2.6723	2.67577	2.70026	2.69552	2.69423	2.68198	2.69278	2.67061	2.69002	2.66444	2.67895	2.64574	2.66188	2.66384	2.67519	2.67093	2.67022	2.64306	2.67886	2.68124	2.68244	2.64808	2.68406	2.68602	2.6916	2.6787	2.69437	2.67358	2.64229	2.68409	2.65166	2.69016	2.74169	2.65157	2.65817	2.65325
8.04397		2.65183	2.68636	2.68342	2.63467	2.6876	2.68671	2.66793	2.67026	2.68311	2.63909	2.66262	2.65536	2.67173	2.67525	2.69681	2.69668	2.69418	2.68207	2.69238	2.67013	2.69023	2.66599	2.67889	2.64563	2.66168	2.66243	2.67388	2.6678	2.66837	2.64256	2.68034	2.67952	2.67927	2.64677	2.68294	2.68576	2.68977	2.67867	2.69343	2.67537	2.64168	2.68439	2.65228	2.6903	2.7404	2.65083	2.6571	2.65373
8.44617		2.65189	2.68609	2.68052	2.63338	2.68731	2.68632	2.67142	2.66921	2.68463	2.64175	2.66326	2.65577	2.67169	2.67544	2.69386	2.69829	2.69313	2.68187	2.6907	2.6703	2.69092	2.66727	2.67841	2.64595	2.66168	2.66179	2.67305	2.66538	2.66687	2.64267	2.6809	2.67851	2.67679	2.64617	2.68125	2.68603	2.68887	2.67912	2.69254	2.67756	2.64229	2.68547	2.65338	2.69104	2.73684	2.6505	2.65665	2.65488
8.84837		2.65125	2.68566	2.67756	2.63205	2.68681	2.68414	2.67449	2.66664	2.68556	2.64393	2.66366	2.65577	2.67131	2.67547	2.69062	2.69941	2.69013	2.68032	2.68689	2.67023	2.69125	2.66717	2.67646	2.64594	2.66076	2.66112	2.67191	2.66294	2.6649	2.64257	2.67948	2.67734	2.67425	2.6454	2.67807	2.68597	2.68799	2.67915	2.69066	2.67916	2.64305	2.68636	2.65412	2.69154	2.73031	2.64961	2.656	2.65583
9.25057		2.649	2.6843	2.67378	2.62987	2.68512	2.67945	2.67619	2.66185	2.68493	2.64446	2.66289	2.65446	2.66972	2.67444	2.68631	2.69913	2.68452	2.67662	2.68041	2.66903	2.69035	2.66479	2.67223	2.64479	2.65798	2.65961	2.66967	2.65973	2.66167	2.6414	2.67528	2.67509	2.67088	2.64355	2.67271	2.6847	2.68619	2.67791	2.68698	2.67915	2.64288	2.68605	2.65364	2.69091	2.72052	2.64724	2.6543	2.65571
9.65277		2.6445	2.6813	2.66852	2.62611	2.68141	2.67191	2.67565	2.65451	2.6819	2.64249	2.66017	2.65107	2.66616	2.67155	2.68029	2.69663	2.67608	2.67032	2.67113	2.66593	2.68746	2.65964	2.6653	2.6418	2.65275	2.65653	2.66565	2.65512	2.65654	2.63842	2.66794	2.67099	2.66602	2.63986	2.66488	2.68146	2.68268	2.67461	2.68099	2.67666	2.64095	2.68366	2.65117	2.6884	2.70768	2.64273	2.65082	2.65373
10.055		2.63751	2.6762	2.66133	2.62031	2.67514	2.66165	2.67224	2.64471	2.67595	2.63762	2.65493	2.6451	2.66017	2.66623	2.67213	2.69139	2.66502	2.66139	2.65934	2.66038	2.68207	2.65168	2.65568	2.63649	2.6449	2.65137	2.65941	2.64868	2.64912	2.63312	2.6576	2.6645	2.65922	2.63382	2.65466	2.67574	2.67692	2.66875	2.67259	2.6711	2.63674	2.67858	2.64621	2.68344	2.69239	2.63577	2.64509	2.64933
10.4572		2.62816	2.66883	2.65209	2.61231	2.66615	2.64917	2.6657	2.63283	2.66693	2.62989	2.64696	2.63644	2.65159	2.65828	2.66171	2.68325	2.65189	2.65018	2.64565	2.6522	2.67406	2.64126	2.64377	2.62871	2.63465	2.64393	2.65081	2.6403	2.63938	2.62534	2.6448	2.65545	2.65033	2.62531	2.64245	2.66735	2.66872	2.66016	2.66203	2.66229	2.63016	2.67057	2.63858	2.67582	2.67554	2.62648	2.63693	2.64227
10.8594		2.61687	2.65934	2.64098	2.60229	2.65469	2.63521	2.65618	2.6195	2.65511	2.61967	2.63643	2.62532	2.64066	2.64784	2.64922	2.67247	2.63742	2.63726	2.63079	2.64157	2.66364	2.62897	2.63019	2.61861	2.62253	2.63435	2.64005	2.63016	2.6276	2.61527	2.63035	2.64405	2.6395	2.61455	2.62885	2.65648	2.65831	2.64906	2.64979	2.6505	2.62144	2.65981	2.62847	2.66567	2.65808	2.61529	2.62656	2.63268
11.2616		2.6042	2.64814	2.62844	2.59072	2.64134	2.62053	2.64416	2.60538	2.64108	2.60756	2.62384	2.61229	2.62791	2.63541	2.63511	2.65962	2.62236	2.62332	2.61552	2.62898	2.65134	2.61555	2.61565	2.60665	2.60918	2.62306	2.62759	2.61873	2.61436	2.60338	2.61509	2.63085	2.62718	2.60209	2.6145	2.64365	2.6462	2.63598	2.63647	2.63635	2.61106	2.64684	2.61637	2.65343	2.64086	2.6028	2.61443	2.62097
11.6638		2.59074	2.63583	2.61509	2.57822	2.6268	2.60582	2.6303	2.59109	2.6256	2.59424	2.60984	2.59805	2.61402	2.62164	2.61999	2.64544	2.60735	2.609	2.60046	2.61509	2.63786	2.60164	2.6008	2.59345	2.59526	2.61064	2.61405	2.60658	2.60034	2.59031	2.59978	2.61652	2.61393	2.58864	2.59999	2.62951	2.63306	2.62161	2.62266	2.62065	2.59956	2.6324	2.60295	2.63974	2.62452	2.58967	2.60118	2.60775
12.066		2.57703	2.62303	2.60154	2.56541	2.61182	2.59161	2.61535	2.57712	2.60944	2.58035	2.59514	2.5833	2.59966	2.60722	2.6045	2.63069	2.5929	2.59484	2.58606	2.60057	2.62387	2.58782	2.58619	2.57964	2.58133	2.5977	2.60004	2.59433	2.58622	2.57671	2.58503	2.60181	2.60039	2.5749	2.5858	2.61476	2.61959	2.60665	2.60888	2.60425	2.58744	2.61724	2.58889	2.62526	2.60947	2.57641	2.58747	2.59368
12.4682		2.56348	2.61027	2.58834	2.55284	2.597	2.57822	2.59998	2.5638	2.59325	2.56643	2.58035	2.56865	2.58542	2.59277	2.58921	2.616	2.5793	2.5812	2.57259	2.58603	2.60996	2.57447	2.57219	2.56577	2.56779	2.58476	2.5861	2.58248	2.57257	2.56314	2.5712	2.58732	2.58708	2.56147	2.57225	2.60001	2.60634	2.59172	2.5955	2.58787	2.57512	2.60204	2.57478	2.61058	2.59588	2.56345	2.57385	2.57934
12.8704		2.5504	2.59795	2.57583	2.54084	2.58276	2.56581	2.5847	2.5513	2.57754	2.5529	2.56592	2.55453	2.57171	2.57874	2.57455	2.60183	2.56669	2.56833	2.56013	2.5719	2.59653	2.56183	2.55901	2.55225	2.55492	2.57221	2.57261	2.57137	2.55975	2.54999	2.55848	2.57348	2.5744	2.54875	2.5595	2.58571	2.5937	2.57725	2.5828	2.57204	2.56291	2.58727	2.56105	2.59615	2.58369	2.55101	2.56072	2.56519
13.2726		2.53795	2.58628	2.5642	2.5296	2.56932	2.55436	2.56988	2.53966	2.56262	2.54004	2.55212	2.54117	2.55874	2.5654	2.56077	2.58842	2.55505	2.55629	2.54861	2.55841	2.58377	2.54999	2.5467	2.53931	2.54281	2.56024	2.55978	2.56112	2.54791	2.53747	2.54688	2.56053	2.56255	2.53695	2.5476	2.5721	2.58183	2.56351	2.57088	2.55709	2.55098	2.57323	2.54796	2.58225	2.5727	2.5392	2.54829	2.55151
13.6748		2.52619	2.57531	2.55345	2.5191	2.55675	2.54372	2.55571	2.52881	2.54862	2.528	2.53907	2.52864	2.54659	2.55283	2.54796	2.57585	2.54424	2.54505	2.53787	2.54566	2.57173	2.53894	2.53523	2.52704	2.53146	2.54889	2.54764	2.5517	2.53705	2.52561	2.53626	2.54851	2.55153	2.52605	2.53645	2.55927	2.57075	2.55058	2.55977	2.54318	2.53942	2.56001	2.53557	2.56901	2.56257	2.52801	2.5366	2.53844
14.077		2.51509	2.56494	2.54341	2.50921	2.54497	2.53367	2.54226	2.51858	2.53557	2.51683	2.52674	2.51688	2.53517	2.541	2.53606	2.56404	2.53405	2.53446	2.52766	2.53361	2.56033	2.52855	2.52444	2.51539	2.52077	2.53809	2.53614	2.54292	2.52698	2.51436	2.52639	2.53731	2.54124	2.51593	2.52593	2.54719	2.5603	2.53841	2.54937	2.53031	2.52826	2.54758	2.52385	2.55641	2.55294	2.51734	2.52557	2.52599
14.4792		2.50457	2.55499	2.53387	2.49972	2.53383	2.52396	2.52952	2.5088	2.5234	2.50647	2.51505	2.50575	2.52435	2.52978	2.52494	2.55287	2.52422	2.52436	2.51773	2.52214	2.54943	2.51868	2.51415	2.50425	2.5106	2.52769	2.52513	2.53453	2.51746	2.50356	2.517	2.52674	2.53146	2.50634	2.51583	2.53572	2.5503	2.52688	2.53955	2.51837	2.51747	2.53584	2.51266	2.54439	2.54342	2.50709	2.51505	2.5141
14.8814		2.49448	2.54528	2.52455	2.4904	2.52315	2.51433	2.51745	2.49925	2.51201	2.49679	2.50384	2.49509	2.51394	2.51902	2.51438	2.54216	2.51454	2.51455	2.50785	2.51112	2.53886	2.50915	2.50416	2.49348	2.50078	2.51754	2.51446	2.52625	2.50822	2.49307	2.5078	2.51657	2.52196	2.49703	2.50596	2.52469	2.54054	2.51584	2.53014	2.50724	2.50703	2.52465	2.50187	2.53283	2.53371	2.49711	2.50487	2.5027
15.2836		2.48471	2.53563	2.51524	2.48106	2.51279	2.50459	2.50598	2.48979	2.50127	2.48762	2.493	2.48472	2.50378	2.50856	2.50421	2.53178	2.50481	2.50485	2.49786	2.50041	2.5285	2.49978	2.49429	2.48296	2.49113	2.50749	2.50397	2.51784	2.49899	2.48274	2.49856	2.50657	2.51253	2.48776	2.49617	2.51395	2.53083	2.50513	2.52096	2.49676	2.49689	2.51385	2.49132	2.52162	2.5236	2.48728	2.49485	2.49168
15.6858		2.47512	2.52591	2.50577	2.47157	2.5026	2.49462	2.49504	2.48028	2.49108	2.47879	2.48241	2.47453	2.49375	2.49829	2.49427	2.52161	2.49491	2.49514	2.48768	2.48992	2.51826	2.49044	2.4844	2.4726	2.48155	2.49743	2.49357	2.50913	2.48959	2.47246	2.48911	2.49657	2.50302	2.47832	2.48633	2.50338	2.52104	2.49462	2.51188	2.4868	2.48704	2.50336	2.48091	2.51069	2.51301	2.47753	2.48489	2.48097
16.088		2.46562	2.51607	2.49605	2.46185	2.4925	2.48438	2.4846	2.47068	2.48133	2.47012	2.47201	2.46443	2.48376	2.48813	2.48448	2.51157	2.4848	2.48535	2.47732	2.47961	2.50809	2.48105	2.47441	2.46234	2.47196	2.48732	2.48319	2.50003	2.47991	2.46218	2.47937	2.48646	2.49335	2.46861	2.4764	2.49289	2.51111	2.48425	2.50278	2.47723	2.47746	2.49309	2.47058	2.49998	2.50198	2.46782	2.47492	2.47053
16.4901		2.45613	2.50612	2.48607	2.45189	2.48246	2.4739	2.47462	2.46098	2.47194	2.46146	2.46176	2.45439	2.47378	2.47805	2.47479	2.50164	2.4745	2.47545	2.46683	2.46945	2.49797	2.47156	2.46431	2.45217	2.46232	2.47715	2.47283	2.49053	2.46991	2.45189	2.46934	2.47619	2.4835	2.45858	2.46636	2.48246	2.50102	2.47398	2.49363	2.46798	2.46815	2.48301	2.4603	2.48949	2.49066	2.45813	2.46493	2.46035
16.8923		2.44661	2.49611	2.47587	2.44175	2.47247	2.46328	2.46508	2.45121	2.46284	2.45273	2.45167	2.44439	2.46381	2.46806	2.46522	2.49182	2.4641	2.46546	2.45633	2.45946	2.48794	2.46199	2.45409	2.44211	2.45264	2.46696	2.46249	2.48068	2.45962	2.4416	2.45911	2.46578	2.47352	2.44825	2.45626	2.47209	2.49082	2.46379	2.48438	2.45898	2.45909	2.47311	2.45011	2.47923	2.47923	2.44851	2.45495	2.45043
17.2945		2.43707	2.4861	2.46553	2.43148	2.46255	2.45264	2.45595	2.44144	2.45396	2.44386	2.44173	2.43448	2.45389	2.45819	2.45578	2.48213	2.45368	2.45545	2.44594	2.44966	2.47802	2.45238	2.44383	2.43219	2.44296	2.45679	2.45222	2.47058	2.44913	2.43136	2.44879	2.45527	2.46346	2.43768	2.44615	2.46181	2.48057	2.45372	2.47507	2.45018	2.45027	2.46339	2.44002	2.46922	2.4679	2.43897	2.44501	2.44077
17.6967		2.4275	2.47618	2.45513	2.42119	2.45273	2.44207	2.44719	2.43173	2.44524	2.43483	2.43197	2.42469	2.44404	2.44846	2.44652	2.47258	2.44333	2.44547	2.43575	2.44007	2.46824	2.44276	2.43358	2.42244	2.4333	2.44671	2.44206	2.46032	2.43853	2.42121	2.4385	2.44474	2.4534	2.42699	2.4361	2.45168	2.47035	2.44378	2.46573	2.44154	2.44165	2.45384	2.43008	2.45947	2.45684	2.42956	2.43518	2.43137
18.0989		2.41792	2.4664	2.44476	2.41094	2.44303	2.43169	2.43875	2.42213	2.43665	2.42568	2.42241	2.41505	2.43433	2.43892	2.43745	2.46319	2.43314	2.43557	2.42583	2.43069	2.45865	2.4332	2.4234	2.41288	2.42372	2.43676	2.43206	2.45	2.42793	2.4112	2.42835	2.43428	2.4434	2.41629	2.42618	2.44174	2.46023	2.43401	2.4564	2.43304	2.43319	2.44448	2.42032	2.45	2.44617	2.42029	2.42549	2.42223
18.5011		2.40839	2.45682	2.4345	2.4008	2.4335	2.42155	2.43057	2.41269	2.42813	2.41646	2.41306	2.40559	2.42477	2.42958	2.42858	2.454	2.42318	2.42582	2.41621	2.42152	2.44926	2.42373	2.41337	2.40354	2.41424	2.42697	2.42226	2.43973	2.41744	2.40138	2.41846	2.42396	2.43351	2.40569	2.41643	2.43202	2.4503	2.42443	2.44713	2.42463	2.42483	2.43529	2.41076	2.4408	2.43595	2.41119	2.41597	2.41333
18.9033		2.39893	2.44748	2.42441	2.39085	2.42416	2.41171	2.42259	2.40343	2.41964	2.40722	2.40391	2.39633	2.4154	2.42045	2.41991	2.445	2.41346	2.41626	2.40689	2.41255	2.44008	2.41441	2.40353	2.39442	2.40489	2.41739	2.41267	2.42958	2.40714	2.39175	2.40887	2.41386	2.42378	2.39531	2.40689	2.42255	2.44061	2.41506	2.43796	2.4163	2.41651	2.42627	2.40142	2.43185	2.42621	2.40224	2.40665	2.40463
19.3055		2.3896	2.43838	2.41455	2.38111	2.41502	2.40217	2.41476	2.39437	2.41118	2.39804	2.39496	2.3873	2.40624	2.41153	2.41142	2.4362	2.404	2.40691	2.39786	2.40374	2.43113	2.40525	2.39392	2.38551	2.3957	2.40802	2.40331	2.41961	2.39711	2.38236	2.39962	2.40403	2.41424	2.38522	2.39758	2.41334	2.4312	2.40589	2.42895	2.40802	2.40819	2.41742	2.39231	2.42313	2.41689	2.39343	2.39753	2.3961
19.7077		2.38043	2.42953	2.40496	2.37164	2.4061	2.39293	2.407	2.38552	2.40272	2.389	2.38621	2.37849	2.39729	2.40282	2.40308	2.42759	2.39481	2.39781	2.38907	2.39508	2.4224	2.39627	2.38459	2.37682	2.38668	2.39889	2.39419	2.40989	2.3874	2.37322	2.39071	2.3945	2.40491	2.37549	2.38852	2.4044	2.42211	2.39695	2.42011	2.39978	2.39985	2.40873	2.38341	2.41463	2.40795	2.38476	2.3886	2.38774
20.1099		2.37148	2.42093	2.39565	2.36246	2.39741	2.384	2.3993	2.37688	2.39428	2.38015	2.37766	2.3699	2.38856	2.39432	2.39487	2.41916	2.38587	2.38896	2.38049	2.38656	2.41388	2.3875	2.37554	2.36835	2.37785	2.39001	2.38533	2.40046	2.37803	2.36432	2.38214	2.38528	2.39582	2.36616	2.37971	2.39573	2.41334	2.38822	2.41147	2.39159	2.39147	2.4002	2.37474	2.40631	2.39931	2.37623	2.37986	2.3795
20.5121		2.36278	2.41258	2.38666	2.35359	2.38896	2.37534	2.39162	2.36845	2.38587	2.37156	2.3693	2.36154	2.38006	2.38601	2.38678	2.41092	2.37718	2.38038	2.37211	2.37818	2.40558	2.37895	2.36679	2.36008	2.36923	2.38139	2.37672	2.39135	2.36904	2.3557	2.37389	2.37638	2.38698	2.35724	2.37115	2.38732	2.40489	2.37971	2.40306	2.38345	2.38308	2.39184	2.36628	2.39816	2.39091	2.36783	2.37133	2.3714
20.9143		2.35435	2.40446	2.37798	2.34505	2.38076	2.36694	2.38395	2.36024	2.37754	2.36324	2.36114	2.35341	2.37178	2.37788	2.37881	2.40286	2.36872	2.37208	2.36389	2.36995	2.39748	2.37062	2.35833	2.35202	2.36084	2.37304	2.36837	2.38259	2.3604	2.34733	2.36592	2.36779	2.37841	2.34873	2.36284	2.37916	2.39676	2.37141	2.39488	2.37539	2.37473	2.38365	2.35803	2.39018	2.38271	2.35959	2.363	2.36343
21.3165		2.34621	2.39658	2.36964	2.33686	2.3728	2.35879	2.37632	2.35225	2.36931	2.35523	2.35318	2.3455	2.36374	2.36994	2.37096	2.39497	2.36049	2.36404	2.35584	2.36188	2.38958	2.36252	2.35017	2.34418	2.35267	2.36495	2.36028	2.37419	2.35213	2.33924	2.3582	2.35952	2.37013	2.34061	2.35476	2.37124	2.38893	2.36333	2.38694	2.36743	2.36645	2.37564	2.34999	2.38235	2.37467	2.35153	2.35489	2.35561
21.7187		2.33836	2.38892	2.36163	2.32901	2.36508	2.35087	2.36872	2.34449	2.36122	2.34751	2.34543	2.33784	2.35594	2.36218	2.36324	2.38726	2.3525	2.35628	2.34797	2.35401	2.38189	2.35467	2.34228	2.33655	2.34475	2.35713	2.35246	2.36615	2.34421	2.33141	2.3507	2.35153	2.36215	2.33285	2.34693	2.36355	2.38138	2.35547	2.37924	2.35959	2.35831	2.36784	2.34216	2.3747	2.36679	2.34366	2.34702	2.34795
22.1209		2.3308	2.38149	2.35393	2.32149	2.3576	2.34317	2.36121	2.33696	2.35331	2.34007	2.3379	2.3304	2.34839	2.35462	2.35567	2.37975	2.34473	2.34877	2.34028	2.34635	2.3744	2.34706	2.33465	2.32914	2.33708	2.34958	2.3449	2.35848	2.33661	2.32385	2.34341	2.34383	2.35447	2.32542	2.33933	2.35608	2.3741	2.34782	2.37177	2.35191	2.35037	2.36024	2.33455	2.36721	2.35906	2.33602	2.33939	2.34047
22.5231		2.32351	2.37427	2.34654	2.31431	2.35035	2.33568	2.35379	2.32966	2.34559	2.33291	2.33059	2.3232	2.34108	2.34726	2.34828	2.37243	2.33721	2.34151	2.33278	2.33893	2.36712	2.33969	2.32726	2.32194	2.32966	2.34229	2.33758	2.35116	2.32933	2.31655	2.3363	2.3364	2.34708	2.31829	2.33196	2.34882	2.36707	2.3404	2.36454	2.34441	2.34267	2.35286	2.32716	2.35991	2.3515	2.32862	2.33203	2.33319
22.9253		2.31648	2.36727	2.33943	2.30743	2.34331	2.3284	2.34651	2.32259	2.3381	2.32599	2.3235	2.31623	2.33402	2.3401	2.3411	2.36533	2.32992	2.33449	2.32549	2.33177	2.36005	2.33257	2.3201	2.31496	2.32248	2.33524	2.33051	2.34416	2.32233	2.3095	2.32935	2.32923	2.33997	2.31142	2.32481	2.34177	2.36027	2.3332	2.35754	2.33712	2.33525	2.34571	2.31998	2.35279	2.34413	2.32147	2.32493	2.32612
23.3275		2.30968	2.36048	2.33258	2.30083	2.33649	2.32133	2.33939	2.31576	2.33085	2.31931	2.31663	2.30949	2.32721	2.33316	2.33413	2.35845	2.32288	2.32768	2.31843	2.32486	2.35319	2.32569	2.31314	2.30817	2.31553	2.32843	2.32367	2.33746	2.3156	2.30269	2.32257	2.3223	2.33313	2.30479	2.31787	2.33491	2.35369	2.32622	2.35075	2.33006	2.32814	2.33878	2.31304	2.34586	2.33695	2.31459	2.31809	2.31926
23.7297		2.30309	2.3539	2.32598	2.29449	2.32986	2.31445	2.33246	2.30914	2.32385	2.31283	2.30997	2.30297	2.32063	2.32643	2.3274	2.35179	2.31607	2.32107	2.31158	2.31819	2.34655	2.31904	2.30638	2.30159	2.30882	2.32183	2.31704	2.33102	2.30912	2.29611	2.31594	2.31562	2.32654	2.29839	2.31116	2.32825	2.34731	2.31945	2.34418	2.32324	2.32134	2.33208	2.30631	2.33912	2.32999	2.30796	2.31152	2.31262
24.1319		2.29671	2.34752	2.31959	2.28837	2.32341	2.30777	2.32573	2.30273	2.31711	2.30654	2.30351	2.29665	2.31427	2.31993	2.32091	2.34536	2.3095	2.31466	2.30497	2.31177	2.34011	2.31263	2.29981	2.2952	2.30231	2.31544	2.31062	2.32482	2.30287	2.28976	2.30947	2.30916	2.32018	2.29219	2.30465	2.32178	2.34113	2.31291	2.3378	2.31666	2.31484	2.3256	2.29982	2.33258	2.32325	2.30159	2.30518	2.30618
24.5341		2.29051	2.34133	2.3134	2.28244	2.31714	2.3013	2.31922	2.29652	2.31062	2.30044	2.29726	2.29053	2.30813	2.31365	2.31467	2.33915	2.30315	2.30842	2.29858	2.30557	2.33388	2.30643	2.29343	2.28899	2.29601	2.30924	2.30438	2.31883	2.29683	2.28362	2.30316	2.30293	2.31403	2.28619	2.29834	2.31548	2.33513	2.30657	2.33162	2.31032	2.30864	2.31934	2.29354	2.32622	2.31673	2.29546	2.29907	2.29995
24.9363		2.28449	2.33534	2.3074	2.27668	2.31104	2.29502	2.31292	2.29049	2.30438	2.2945	2.29118	2.28458	2.30218	2.3076	2.30865	2.33316	2.29701	2.30236	2.29241	2.29956	2.32785	2.30043	2.28724	2.28297	2.2899	2.30322	2.29833	2.31303	2.29099	2.27769	2.29702	2.29689	2.30808	2.28036	2.29223	2.30937	2.3293	2.30045	2.32562	2.30423	2.3027	2.31327	2.28748	2.32006	2.31043	2.28955	2.29316	2.2939
25.3385		2.27863	2.32953	2.30158	2.27108	2.30511	2.28895	2.30684	2.28463	2.2984	2.28873	2.28529	2.27881	2.2964	2.30175	2.30285	2.32736	2.29106	2.29647	2.28646	2.29373	2.32201	2.29463	2.28123	2.27713	2.28397	2.29737	2.29245	2.30741	2.28533	2.27195	2.29105	2.29104	2.30232	2.27471	2.28631	2.30344	2.32362	2.29452	2.31979	2.29837	2.29699	2.30739	2.28163	2.31408	2.30434	2.28384	2.28743	2.28804
25.7407		2.27295	2.3239	2.29594	2.26562	2.29934	2.28308	2.30097	2.27894	2.29265	2.28312	2.27956	2.27318	2.29079	2.29611	2.29726	2.32174	2.28531	2.29075	2.2807	2.28805	2.31634	2.289	2.27542	2.27146	2.27822	2.29171	2.28674	2.30196	2.27984	2.2664	2.28527	2.28537	2.29674	2.26922	2.28057	2.29769	2.31808	2.28879	2.31412	2.29273	2.29148	2.30169	2.27597	2.30828	2.29845	2.27832	2.28186	2.28234
26.1429		2.26744	2.31844	2.29046	2.26029	2.29374	2.27742	2.29531	2.2734	2.28713	2.27766	2.274	2.2677	2.28533	2.29066	2.29185	2.3163	2.27973	2.2852	2.27514	2.28251	2.31085	2.28354	2.2698	2.26596	2.27263	2.28621	2.28121	2.29666	2.27451	2.26104	2.27967	2.27986	2.29132	2.26388	2.27502	2.29212	2.31267	2.28323	2.30862	2.28729	2.28614	2.29616	2.27051	2.30266	2.29276	2.27297	2.27642	2.2768
26.5451		2.2621	2.31315	2.28516	2.25509	2.2883	2.27197	2.28985	2.26802	2.28183	2.27236	2.26859	2.26236	2.28001	2.28539	2.28662	2.31101	2.27431	2.27983	2.26976	2.27711	2.30552	2.27826	2.26438	2.26064	2.26721	2.28089	2.27584	2.29153	2.26934	2.25585	2.27427	2.2745	2.28608	2.25871	2.26965	2.28672	2.30738	2.27786	2.30327	2.28206	2.28096	2.29078	2.26523	2.29723	2.28727	2.26778	2.27112	2.27142
26.9473		2.25694	2.30803	2.28005	2.25002	2.28305	2.26673	2.28457	2.26281	2.27673	2.26722	2.26335	2.25716	2.27482	2.28029	2.28154	2.30587	2.26907	2.27465	2.26456	2.27182	2.30034	2.27313	2.25917	2.2555	2.26196	2.27575	2.27066	2.28657	2.26432	2.25083	2.26908	2.26928	2.28102	2.25368	2.26446	2.28151	2.30222	2.27266	2.29808	2.277	2.2759	2.28556	2.26013	2.29198	2.28197	2.26276	2.26595	2.26619
27.3495		2.25196	2.30307	2.27511	2.24509	2.27797	2.26171	2.27947	2.25775	2.27184	2.26226	2.25828	2.2521	2.26977	2.27535	2.27661	2.30087	2.264	2.26966	2.25953	2.26667	2.29532	2.26817	2.25417	2.25054	2.25689	2.27079	2.26565	2.28176	2.25946	2.24598	2.26409	2.2642	2.27612	2.24882	2.25946	2.27648	2.29718	2.26762	2.29306	2.27213	2.27097	2.2805	2.25519	2.28691	2.27686	2.25788	2.26091	2.26111
27.7517		2.24716	2.29827	2.27035	2.2403	2.27308	2.2569	2.27455	2.25288	2.26712	2.25746	2.25337	2.2472	2.26487	2.27057	2.27183	2.29603	2.25909	2.26488	2.25468	2.26165	2.29045	2.26338	2.24938	2.24576	2.25198	2.26602	2.26083	2.27712	2.25477	2.24129	2.25931	2.25927	2.2714	2.24411	2.25465	2.27164	2.29228	2.26276	2.28821	2.26744	2.26616	2.2756	2.25041	2.28203	2.27195	2.25316	2.256	2.25618
28.1539		2.24255	2.29365	2.26576	2.23566	2.26837	2.25229	2.26979	2.24818	2.26258	2.25285	2.24864	2.24246	2.26011	2.26593	2.2672	2.29133	2.25437	2.26029	2.25	2.25676	2.28574	2.25877	2.24479	2.24116	2.24726	2.26142	2.25618	2.27263	2.25024	2.23676	2.25474	2.25448	2.26685	2.23958	2.25003	2.26699	2.28751	2.25805	2.28353	2.26291	2.26147	2.27086	2.2458	2.27733	2.26723	2.24859	2.25123	2.25142
28.5561		2.2381	2.28918	2.26136	2.23117	2.26385	2.24788	2.2652	2.24366	2.2582	2.24842	2.2441	2.23789	2.25551	2.26145	2.26271	2.28678	2.24982	2.25591	2.24549	2.25203	2.28119	2.25433	2.24041	2.23674	2.24271	2.25701	2.25172	2.2683	2.24588	2.23238	2.25037	2.24985	2.26246	2.23522	2.24559	2.26252	2.2829	2.25352	2.27902	2.25855	2.25691	2.26628	2.24133	2.27281	2.2627	2.24417	2.24662	2.24682
28.9583		2.23383	2.28489	2.25711	2.22684	2.2595	2.24366	2.26077	2.23931	2.25396	2.24415	2.23973	2.2335	2.25107	2.2571	2.25837	2.2824	2.24546	2.25172	2.24114	2.24746	2.2768	2.25006	2.23622	2.23249	2.23833	2.25276	2.24743	2.26412	2.2417	2.22815	2.24619	2.24538	2.25823	2.23103	2.24133	2.25823	2.27845	2.24914	2.27468	2.25436	2.25247	2.26187	2.23702	2.26847	2.25836	2.23991	2.24217	2.24238
29.3605		2.22971	2.28075	2.25302	2.22268	2.25532	2.2396	2.25649	2.23514	2.24987	2.24005	2.23553	2.22928	2.24679	2.2529	2.25418	2.27817	2.24127	2.2477	2.23695	2.24304	2.27257	2.24597	2.2322	2.22841	2.23412	2.24867	2.2433	2.26008	2.23768	2.22407	2.24218	2.24108	2.25415	2.22701	2.23724	2.25412	2.27416	2.24493	2.27051	2.25032	2.24817	2.25764	2.23285	2.2643	2.2542	2.23579	2.23787	2.2381
29.7627		2.22572	2.27676	2.24907	2.21867	2.2513	2.2357	2.25236	2.23113	2.2459	2.2361	2.23151	2.22522	2.24268	2.24885	2.25013	2.2741	2.23724	2.24385	2.23291	2.23878	2.2685	2.24203	2.22834	2.22448	2.23006	2.24473	2.23931	2.25616	2.23382	2.22012	2.23834	2.23695	2.2502	2.22317	2.2333	2.25016	2.27004	2.24086	2.26648	2.24642	2.244	2.25357	2.22883	2.26028	2.25021	2.23182	2.23374	2.23399
30.1649		2.22186	2.27291	2.24524	2.21481	2.24741	2.23192	2.24837	2.22727	2.24205	2.23229	2.22764	2.22134	2.23873	2.24492	2.24621	2.27018	2.23337	2.24014	2.22901	2.23468	2.26458	2.23823	2.22461	2.2207	2.22613	2.24092	2.23546	2.25236	2.23011	2.2163	2.23463	2.23298	2.24639	2.21948	2.22951	2.24635	2.26608	2.23695	2.26259	2.24266	2.23995	2.24965	2.22494	2.25641	2.24637	2.22798	2.22976	2.23002
30.5671		2.2181	2.26918	2.24152	2.21109	2.24366	2.22826	2.24451	2.22354	2.23831	2.22858	2.22392	2.21759	2.23492	2.24113	2.24241	2.26641	2.22964	2.23654	2.22524	2.23071	2.2608	2.23457	2.221	2.21704	2.22233	2.23722	2.23172	2.24866	2.22653	2.2126	2.23104	2.22918	2.24268	2.21595	2.22584	2.24267	2.26227	2.23316	2.25881	2.23903	2.23602	2.24589	2.22119	2.25266	2.24267	2.22425	2.22592	2.22621
30.9693		2.21444	2.26557	2.23789	2.20749	2.24	2.2247	2.24076	2.21993	2.23467	2.22497	2.22033	2.21399	2.23126	2.23746	2.23872	2.26276	2.22602	2.23305	2.22159	2.22686	2.25715	2.23102	2.2175	2.2135	2.21862	2.23362	2.22809	2.24504	2.22307	2.20901	2.22756	2.22551	2.23908	2.21256	2.22228	2.2391	2.25861	2.22951	2.25514	2.23552	2.2322	2.24226	2.21755	2.24902	2.23908	2.22064	2.22219	2.22252
31.3715		2.21085	2.26205	2.23434	2.20401	2.23645	2.22122	2.23712	2.21642	2.23113	2.22145	2.21685	2.2105	2.22773	2.2339	2.23514	2.25924	2.22251	2.22964	2.21804	2.22313	2.25363	2.22758	2.21409	2.21006	2.21501	2.23011	2.22455	2.24151	2.21971	2.20553	2.22417	2.22197	2.23556	2.20929	2.21881	2.23563	2.25507	2.22597	2.25156	2.2321	2.22848	2.23875	2.21403	2.24549	2.2356	2.21713	2.21858	2.21895
31.7737		2.20735	2.25861	2.23086	2.20064	2.23297	2.21782	2.23357	2.21301	2.22769	2.21799	2.21348	2.20712	2.22432	2.23045	2.23164	2.25583	2.21909	2.2263	2.21459	2.21949	2.25021	2.22424	2.21076	2.20672	2.21148	2.22668	2.22111	2.23805	2.21643	2.20215	2.22087	2.21855	2.23213	2.20614	2.21543	2.23225	2.25164	2.22255	2.24806	2.22878	2.22484	2.23535	2.21062	2.24204	2.2322	2.21371	2.21505	2.21549
32.1759		2.20392	2.25526	2.22745	2.19735	2.22956	2.2145	2.23013	2.20968	2.22434	2.2146	2.21019	2.20384	2.22101	2.22709	2.22822	2.25251	2.21575	2.22303	2.21124	2.21594	2.2469	2.22099	2.20752	2.20347	2.20801	2.22333	2.21775	2.23467	2.21323	2.19886	2.21765	2.21522	2.22878	2.2031	2.21214	2.22895	2.24831	2.21923	2.24464	2.22555	2.22128	2.23205	2.2073	2.23867	2.2289	2.21037	2.21161	2.21213
32.5781		2.20056	2.25197	2.22411	2.19415	2.22622	2.21126	2.22677	2.20644	2.22108	2.21127	2.20699	2.20064	2.2178	2.22383	2.22488	2.24929	2.21249	2.21983	2.20797	2.21247	2.24367	2.21782	2.20436	2.2003	2.20462	2.22004	2.21447	2.23136	2.21011	2.19567	2.21451	2.21198	2.2255	2.20015	2.20893	2.22573	2.24507	2.21601	2.24128	2.2224	2.21779	2.22883	2.20409	2.23538	2.22567	2.20712	2.20824	2.20885
32.9803		2.1973	2.24877	2.22085	2.19103	2.22294	2.20808	2.2235	2.20328	2.21792	2.20802	2.20387	2.19752	2.21469	2.22066	2.22161	2.24616	2.20931	2.2167	2.20478	2.20908	2.24053	2.21474	2.20129	2.19722	2.2013	2.21684	2.21129	2.22813	2.20706	2.19257	2.21145	2.20882	2.2223	2.1973	2.20581	2.22258	2.24191	2.21289	2.238	2.21933	2.21438	2.22569	2.20097	2.23218	2.22253	2.20396	2.20493	2.20566
33.3825		2.19412	2.24563	2.21766	2.18798	2.21974	2.20499	2.22033	2.2002	2.21485	2.20484	2.20082	2.19447	2.21165	2.21758	2.21843	2.24311	2.2062	2.21364	2.20168	2.20577	2.23748	2.21174	2.19831	2.19422	2.19806	2.21371	2.2082	2.22498	2.20408	2.18956	2.20847	2.20572	2.21919	2.19452	2.20277	2.21953	2.23882	2.20986	2.2348	2.21633	2.21105	2.22262	2.19795	2.22906	2.21948	2.20087	2.2017	2.20255
33.7847		2.19103	2.24258	2.21455	2.18501	2.21661	2.20198	2.21724	2.19721	2.21187	2.20175	2.19786	2.19151	2.2087	2.21458	2.21533	2.24014	2.20318	2.21066	2.19867	2.20256	2.2345	2.20882	2.19541	2.1913	2.1949	2.21067	2.20519	2.22192	2.20119	2.18664	2.20556	2.2027	2.21615	2.1918	2.19981	2.21655	2.23581	2.20691	2.23167	2.21342	2.20781	2.21962	2.19501	2.22603	2.21652	2.19788	2.19855	2.19952
34.1869		2.18804	2.2396	2.21153	2.18211	2.21357	2.19905	2.21423	2.1943	2.20897	2.19874	2.19497	2.18861	2.20582	2.21167	2.21233	2.23724	2.20023	2.20777	2.19573	2.19945	2.23159	2.20597	2.1926	2.18845	2.19182	2.20771	2.20228	2.21894	2.19837	2.18379	2.20273	2.19974	2.2132	2.18914	2.19694	2.21367	2.23287	2.20405	2.22863	2.21059	2.20468	2.21669	2.19215	2.22309	2.21366	2.19497	2.19549	2.19658
34.5891		2.18514	2.2367	2.2086	2.1793	2.21062	2.19618	2.2113	2.19148	2.20616	2.19583	2.19216	2.18578	2.203	2.20884	2.20944	2.23442	2.19738	2.20495	2.19289	2.19647	2.22874	2.20318	2.18984	2.18568	2.18884	2.20484	2.19945	2.21606	2.19563	2.18102	2.19996	2.19684	2.21034	2.18652	2.19416	2.21086	2.23001	2.20124	2.22568	2.20782	2.20166	2.21384	2.18938	2.22024	2.21088	2.19214	2.19254	2.19372
34.9913		2.18232	2.23388	2.20576	2.17657	2.20776	2.19339	2.20844	2.18874	2.20342	2.193	2.18943	2.18302	2.20025	2.20608	2.20667	2.23166	2.1946	2.20221	2.19012	2.19361	2.22595	2.20044	2.18714	2.18297	2.18596	2.20207	2.1967	2.21326	2.19297	2.17832	2.19723	2.19402	2.20755	2.1839	2.19144	2.20814	2.22721	2.1985	2.22281	2.20512	2.19878	2.21105	2.18667	2.21747	2.20819	2.1894	2.18971	2.19096
35.3935		2.17958	2.23113	2.203	2.17391	2.205	2.19065	2.20564	2.18607	2.20075	2.19027	2.18676	2.18031	2.19755	2.20339	2.20401	2.22895	2.1919	2.19953	2.18742	2.19089	2.22321	2.19775	2.18447	2.18032	2.18316	2.19937	2.19402	2.21054	2.19037	2.17566	2.19453	2.19126	2.20485	2.18128	2.18879	2.20549	2.22448	2.19579	2.22002	2.20247	2.19604	2.20833	2.18401	2.2148	2.20558	2.18674	2.18699	2.18828
35.7957		2.17691	2.22844	2.20032	2.17133	2.20232	2.18794	2.20288	2.18346	2.19814	2.18761	2.18416	2.17766	2.1949	2.20075	2.20147	2.2263	2.18928	2.19691	2.18478	2.18832	2.2205	2.19508	2.18181	2.17771	2.18044	2.19676	2.1914	2.2079	2.18784	2.17304	2.19184	2.18856	2.20221	2.17863	2.18619	2.2029	2.22181	2.1931	2.21731	2.19987	2.19344	2.20566	2.1814	2.2122	2.20304	2.18415	2.18441	2.18568
36.1979		2.17428	2.2258	2.1977	2.16882	2.19973	2.18527	2.20016	2.18091	2.19558	2.18502	2.18162	2.17505	2.19228	2.19817	2.19904	2.22368	2.1867	2.19432	2.18221	2.18589	2.21783	2.19242	2.17915	2.17513	2.17779	2.19421	2.18883	2.20531	2.18535	2.17044	2.18915	2.18591	2.19963	2.17594	2.18361	2.20036	2.21918	2.19044	2.21466	2.19731	2.19098	2.20305	2.17883	2.20967	2.20055	2.18162	2.18196	2.18316
36.6001		2.17169	2.22319	2.19514	2.16638	2.19721	2.18261	2.19747	2.1784	2.19306	2.18248	2.17912	2.17248	2.1897	2.19563	2.19672	2.22109	2.18418	2.19177	2.17968	2.18359	2.21518	2.18977	2.17645	2.17258	2.17521	2.19172	2.18629	2.20278	2.18291	2.16787	2.18644	2.18332	2.19711	2.1732	2.18107	2.19786	2.2166	2.18778	2.21206	2.19477	2.18866	2.20049	2.17628	2.2072	2.19811	2.17914	2.17963	2.18071
37.0023		2.16913	2.22062	2.19262	2.164	2.19475	2.17996	2.1948	2.17592	2.19057	2.17999	2.17666	2.16994	2.18714	2.19311	2.1945	2.21853	2.1817	2.18923	2.1772	2.18141	2.21255	2.18711	2.17373	2.17005	2.17268	2.18929	2.18378	2.2003	2.18049	2.16531	2.1837	2.18076	2.19463	2.1704	2.17853	2.19537	2.21405	2.18512	2.20951	2.19226	2.18646	2.19798	2.17374	2.20478	2.19569	2.17671	2.17741	2.17833
37.4045		2.1666	2.21807	2.19014	2.16167	2.19234	2.17731	2.19214	2.17347	2.18812	2.17754	2.17424	2.16743	2.18461	2.19062	2.19236	2.216	2.17924	2.18669	2.17475	2.17932	2.20995	2.18446	2.17098	2.16754	2.17019	2.1869	2.18129	2.19785	2.17811	2.16276	2.18093	2.17825	2.19219	2.16755	2.17599	2.19291	2.21152	2.18247	2.207	2.18976	2.18436	2.19551	2.17122	2.2024	2.19329	2.1743	2.17528	2.17601
37.8067		2.16409	2.21555	2.18768	2.15938	2.18998	2.17466	2.1895	2.17104	2.18571	2.17511	2.17185	2.16496	2.18211	2.18816	2.19028	2.2135	2.17682	2.18417	2.17234	2.17732	2.20737	2.18181	2.16821	2.16506	2.16773	2.18454	2.17882	2.19544	2.17575	2.16024	2.17815	2.17576	2.18978	2.16469	2.17347	2.19047	2.20902	2.17983	2.20452	2.18729	2.18234	2.19307	2.16872	2.20007	2.19091	2.17193	2.17324	2.17374
38.2089		2.1616	2.21304	2.18526	2.15714	2.18766	2.17203	2.18688	2.16864	2.18333	2.17271	2.16949	2.16252	2.17965	2.18572	2.18825	2.21102	2.17441	2.18165	2.16996	2.17536	2.20482	2.17917	2.16543	2.1626	2.1653	2.18222	2.17638	2.19306	2.17341	2.15774	2.17536	2.17332	2.18741	2.16182	2.17095	2.18804	2.20655	2.17722	2.20206	2.18485	2.18036	2.19068	2.16624	2.19776	2.18855	2.16958	2.17125	2.17151
38.6111		2.15913	2.21057	2.18286	2.15493	2.18536	2.16942	2.18428	2.16626	2.181	2.17034	2.16716	2.16012	2.17722	2.18332	2.18626	2.20859	2.17204	2.17915	2.16761	2.17344	2.20231	2.17655	2.16268	2.16019	2.1629	2.17993	2.17397	2.19071	2.17111	2.15528	2.1726	2.1709	2.18508	2.15898	2.16845	2.18564	2.20411	2.17465	2.19963	2.18244	2.17841	2.18832	2.16379	2.19549	2.18621	2.16726	2.16931	2.16932
39.0133		2.15671	2.20814	2.18049	2.15277	2.1831	2.16685	2.18172	2.16392	2.1787	2.168	2.16487	2.15777	2.17484	2.18094	2.18429	2.2062	2.16969	2.17667	2.16531	2.17154	2.19985	2.17398	2.15996	2.15782	2.16053	2.17766	2.17159	2.1884	2.16884	2.15286	2.16987	2.16853	2.18278	2.15621	2.16598	2.18327	2.2017	2.17213	2.19723	2.18008	2.17646	2.18601	2.16138	2.19325	2.1839	2.16496	2.16738	2.16717
39.4155		2.15432	2.20574	2.17816	2.15063	2.18085	2.16432	2.1792	2.16161	2.17646	2.16569	2.16262	2.15547	2.1725	2.17861	2.18233	2.20385	2.16737	2.17423	2.16305	2.16962	2.19745	2.17146	2.15731	2.15551	2.15819	2.17543	2.16925	2.18613	2.16662	2.15049	2.16721	2.16621	2.18052	2.15353	2.16355	2.18094	2.19934	2.16967	2.19486	2.17777	2.17449	2.18375	2.15902	2.19104	2.18162	2.16269	2.16546	2.16505
39.8177		2.15198	2.20339	2.17587	2.14852	2.17863	2.16186	2.17672	2.15935	2.17426	2.16341	2.16042	2.15322	2.17022	2.17633	2.18037	2.20156	2.1651	2.17184	2.16083	2.16769	2.1951	2.169	2.15475	2.15327	2.15588	2.17323	2.16696	2.18389	2.16444	2.14818	2.16464	2.16393	2.1783	2.15096	2.16118	2.17866	2.19701	2.16729	2.19252	2.17552	2.17251	2.18153	2.15672	2.18886	2.17938	2.16045	2.16353	2.16295
40.2199		2.14969	2.2011	2.17362	2.14645	2.17643	2.15947	2.1743	2.15714	2.17211	2.16118	2.15826	2.15101	2.16798	2.17409	2.17839	2.19932	2.16286	2.16951	2.15866	2.16572	2.19282	2.16661	2.1523	2.15108	2.15361	2.17106	2.16471	2.1817	2.16231	2.14593	2.16218	2.16171	2.17613	2.14853	2.15887	2.17643	2.19473	2.16499	2.19022	2.17333	2.17049	2.17935	2.15448	2.18671	2.17719	2.15824	2.16158	2.16087
40.6221		2.14745	2.19885	2.17142	2.14439	2.17424	2.15716	2.17194	2.15497	2.17	2.159	2.15614	2.14885	2.16579	2.17191	2.1764	2.19713	2.16068	2.16725	2.15653	2.16371	2.19059	2.16431	2.14996	2.14896	2.15137	2.16893	2.16252	2.17955	2.16023	2.14374	2.15983	2.15954	2.174	2.14623	2.15663	2.17426	2.1925	2.16277	2.18796	2.1712	2.16843	2.17721	2.1523	2.18459	2.17504	2.15607	2.1596	2.15881
41.0243		2.14526	2.19666	2.16927	2.14236	2.17208	2.15493	2.16963	2.15285	2.16793	2.15685	2.15407	2.14674	2.16365	2.16977	2.17438	2.19499	2.15854	2.16506	2.15444	2.16166	2.18842	2.16208	2.14773	2.14689	2.14917	2.16683	2.16039	2.17743	2.1582	2.14162	2.15759	2.15741	2.17191	2.14408	2.15446	2.17215	2.19031	2.16063	2.18573	2.16914	2.16634	2.17511	2.15019	2.1825	2.17294	2.15393	2.15759	2.15676
41.4265		2.14313	2.19452	2.16717	2.14035	2.16993	2.15279	2.16737	2.15078	2.1659	2.15475	2.15204	2.14466	2.16156	2.16767	2.17233	2.1929	2.15644	2.16294	2.15239	2.15957	2.18629	2.15992	2.14562	2.14488	2.147	2.16477	2.15831	2.17536	2.15622	2.13956	2.15547	2.15534	2.16987	2.14205	2.15237	2.17011	2.18817	2.15856	2.18354	2.16713	2.16421	2.17304	2.14814	2.18044	2.17089	2.15181	2.15554	2.15473
41.8287		2.14104	2.19242	2.16512	2.13836	2.1678	2.15072	2.16517	2.14875	2.16391	2.15269	2.15004	2.14263	2.1595	2.16562	2.17027	2.19084	2.15439	2.1609	2.15038	2.15744	2.18421	2.15785	2.14363	2.14292	2.14487	2.16273	2.15628	2.17332	2.15429	2.13754	2.15346	2.1533	2.16786	2.14015	2.15035	2.16812	2.18607	2.15655	2.18138	2.16517	2.16206	2.17101	2.14613	2.1784	2.16889	2.14973	2.15346	2.1527
42.2309		2.139	2.19036	2.16312	2.13639	2.16569	2.14873	2.16301	2.14677	2.16195	2.15066	2.14808	2.14063	2.15748	2.16361	2.16818	2.18882	2.15239	2.15893	2.14839	2.15528	2.18217	2.15584	2.14174	2.141	2.14276	2.16073	2.1543	2.17133	2.15241	2.13558	2.15155	2.15131	2.1659	2.13836	2.1484	2.1662	2.184	2.15459	2.17926	2.16326	2.15988	2.16901	2.14417	2.17639	2.16694	2.14767	2.15135	2.15069
42.6331		2.137	2.18834	2.16117	2.13445	2.16362	2.14681	2.16089	2.14481	2.16001	2.14868	2.14616	2.13867	2.15549	2.16163	2.16608	2.18684	2.15044	2.15704	2.14643	2.15309	2.18016	2.1539	2.13994	2.13912	2.14069	2.15876	2.15237	2.16937	2.15057	2.13367	2.14973	2.14934	2.16398	2.13667	2.14651	2.16432	2.18198	2.15269	2.17717	2.16139	2.15769	2.16703	2.14225	2.17441	2.16503	2.14564	2.14922	2.14869
43.0353		2.13504	2.18637	2.15926	2.13253	2.16157	2.14495	2.15881	2.1429	2.15811	2.14673	2.14427	2.13674	2.15355	2.15968	2.16397	2.18488	2.14852	2.15521	2.1445	2.1509	2.17819	2.15202	2.13821	2.13728	2.13866	2.15683	2.15048	2.16744	2.14877	2.13179	2.14797	2.1474	2.16209	2.13505	2.14468	2.1625	2.17999	2.15082	2.17511	2.15956	2.1555	2.16509	2.14036	2.17245	2.16316	2.14366	2.14709	2.1467
43.4375		2.13313	2.18442	2.1574	2.13064	2.15957	2.14316	2.15677	2.14101	2.15624	2.14483	2.14241	2.13484	2.15163	2.15777	2.16188	2.18294	2.14665	2.15344	2.14259	2.14872	2.17624	2.1502	2.13656	2.13547	2.13666	2.15493	2.14862	2.16555	2.14701	2.12995	2.14628	2.14549	2.16024	2.13349	2.14289	2.16073	2.17804	2.149	2.1731	2.15776	2.15332	2.16319	2.13851	2.17052	2.16134	2.14171	2.14497	2.14474
43.8397		2.13126	2.18252	2.15557	2.12878	2.15762	2.14141	2.15476	2.13916	2.15439	2.14296	2.1406	2.13298	2.14975	2.15589	2.1598	2.18103	2.14483	2.15173	2.14071	2.14656	2.17431	2.14842	2.13495	2.13369	2.13469	2.15307	2.1468	2.1637	2.14529	2.12815	2.14463	2.14361	2.15842	2.13197	2.14116	2.159	2.17612	2.1472	2.17112	2.15599	2.15116	2.16131	2.13668	2.16863	2.15957	2.1398	2.14286	2.1428
44.2419		2.12942	2.18065	2.15378	2.12696	2.15571	2.13971	2.15277	2.13735	2.15258	2.14113	2.13882	2.13115	2.14791	2.15404	2.15775	2.17915	2.14304	2.15006	2.13886	2.14444	2.17241	2.14669	2.13338	2.13195	2.13276	2.15125	2.145	2.16188	2.14361	2.12637	2.14301	2.14175	2.15664	2.13048	2.13946	2.1573	2.17422	2.14543	2.16917	2.15425	2.14905	2.15948	2.13489	2.16677	2.15782	2.13795	2.1408	2.14089
44.6441		2.12762	2.17881	2.15202	2.12518	2.15384	2.13803	2.1508	2.13556	2.1508	2.13934	2.13708	2.12935	2.14609	2.15223	2.15574	2.17728	2.14128	2.14842	2.13704	2.14237	2.17053	2.14499	2.13182	2.13023	2.13086	2.14947	2.14324	2.16008	2.14195	2.12462	2.1414	2.13992	2.1549	2.129	2.13778	2.15564	2.17236	2.14368	2.16726	2.15252	2.14698	2.15767	2.13312	2.16495	2.15611	2.13614	2.13879	2.13901
45.0463		2.12585	2.177	2.15029	2.12344	2.15202	2.13638	2.14884	2.1338	2.14904	2.13758	2.13538	2.12758	2.14429	2.15044	2.15379	2.17544	2.13956	2.14681	2.13524	2.14036	2.16866	2.14331	2.13027	2.12854	2.12899	2.14772	2.1415	2.15832	2.14033	2.12289	2.1398	2.13811	2.15318	2.12751	2.13613	2.154	2.17052	2.14195	2.16538	2.15082	2.14497	2.1559	2.13137	2.16315	2.15443	2.13438	2.13684	2.13717
45.4485		2.1241	2.17521	2.14857	2.12173	2.15023	2.13473	2.1469	2.13206	2.14732	2.13585	2.13371	2.12584	2.14252	2.14869	2.15189	2.17361	2.13786	2.14521	2.13346	2.13842	2.16682	2.14165	2.12872	2.12687	2.12716	2.146	2.13978	2.15658	2.13873	2.12118	2.13818	2.13633	2.15149	2.126	2.13449	2.15238	2.16871	2.14022	2.16353	2.14914	2.14304	2.15417	2.12964	2.16139	2.15276	2.13266	2.13496	2.13537
45.8507		2.12238	2.17344	2.14686	2.12005	2.14847	2.13309	2.14497	2.13034	2.14561	2.13414	2.13207	2.12412	2.14077	2.14695	2.15004	2.17181	2.13617	2.14361	2.13171	2.13656	2.16499	2.14	2.12714	2.12522	2.12534	2.14431	2.13807	2.15485	2.13714	2.11948	2.13654	2.13457	2.14982	2.12447	2.13285	2.15077	2.16691	2.1385	2.1617	2.14746	2.14117	2.15245	2.12793	2.15966	2.15109	2.13098	2.13314	2.1336
46.2529		2.12067	2.17168	2.14517	2.11841	2.14673	2.13145	2.14304	2.12863	2.14392	2.13245	2.13044	2.12241	2.13902	2.14524	2.14825	2.17002	2.1345	2.142	2.12998	2.13475	2.16317	2.13835	2.12554	2.12357	2.12355	2.14263	2.13639	2.15315	2.13558	2.11779	2.13487	2.13282	2.14817	2.12291	2.13122	2.14916	2.16512	2.13679	2.15988	2.1458	2.13937	2.15076	2.12623	2.15795	2.14944	2.12932	2.13139	2.13186
46.6551		2.11897	2.16994	2.14349	2.11679	2.14501	2.1298	2.14112	2.12694	2.14225	2.13079	2.12883	2.12072	2.13729	2.14354	2.14651	2.16825	2.13283	2.14039	2.12826	2.133	2.16137	2.13669	2.12392	2.12194	2.12177	2.14097	2.13471	2.15146	2.13402	2.11612	2.13319	2.1311	2.14653	2.12133	2.12957	2.14756	2.16334	2.13508	2.15808	2.14415	2.13763	2.14909	2.12454	2.15627	2.14778	2.12768	2.12969	2.13015
47.0573		2.11728	2.1682	2.14181	2.11519	2.1433	2.12814	2.13921	2.12526	2.1406	2.12914	2.12722	2.11905	2.13557	2.14185	2.14481	2.16649	2.13117	2.13877	2.12656	2.13129	2.15959	2.13505	2.12228	2.1203	2.12001	2.13933	2.13305	2.14978	2.13248	2.11445	2.13149	2.12939	2.1449	2.11973	2.12793	2.14596	2.16158	2.13338	2.15629	2.14251	2.13594	2.14744	2.12287	2.15459	2.14613	2.12605	2.12803	2.12847
47.4595		2.1156	2.16647	2.14014	2.11362	2.1416	2.12649	2.13731	2.12359	2.13896	2.12751	2.12562	2.11739	2.13387	2.14018	2.14314	2.16475	2.12952	2.13714	2.12487	2.12961	2.15783	2.1334	2.12064	2.11868	2.11827	2.1377	2.13141	2.14813	2.13095	2.1128	2.12978	2.1277	2.14329	2.11814	2.12629	2.14436	2.15982	2.1317	2.15452	2.14089	2.13429	2.14579	2.12122	2.15293	2.14448	2.12444	2.12639	2.1268
47.8617		2.11394	2.16476	2.13849	2.11205	2.1399	2.12485	2.13543	2.12193	2.13734	2.1259	2.12403	2.11574	2.13218	2.13852	2.14149	2.16303	2.12788	2.13552	2.12319	2.12794	2.1561	2.13178	2.119	2.11707	2.11655	2.13608	2.12979	2.1465	2.12945	2.11117	2.1281	2.12603	2.14169	2.11657	2.12467	2.14279	2.15807	2.13004	2.15276	2.13929	2.13265	2.14416	2.11958	2.15129	2.14284	2.12283	2.12477	2.12515
48.2638		2.1123	2.16307	2.13687	2.1105	2.13822	2.12323	2.13358	2.12031	2.13574	2.12432	2.12245	2.11411	2.13051	2.13688	2.13986	2.16134	2.12626	2.13392	2.12154	2.12626	2.15439	2.13018	2.1174	2.11548	2.11484	2.13448	2.12819	2.1449	2.12797	2.10958	2.12644	2.12439	2.1401	2.11503	2.12306	2.14123	2.15634	2.12841	2.15102	2.13773	2.13103	2.14254	2.11798	2.14966	2.14122	2.12124	2.12316	2.12351
48.666		2.11068	2.16141	2.13526	2.10897	2.13656	2.12165	2.13175	2.11871	2.13417	2.12276	2.12088	2.11251	2.12887	2.13526	2.13823	2.15967	2.12466	2.13235	2.11992	2.12457	2.15272	2.12862	2.11584	2.11392	2.11317	2.13291	2.12662	2.14332	2.12653	2.10802	2.12484	2.12277	2.13854	2.11355	2.12149	2.13971	2.15463	2.12683	2.1493	2.1362	2.1294	2.14094	2.11641	2.14805	2.13962	2.11966	2.12154	2.12189
49.0682		2.10909	2.15979	2.1337	2.10745	2.13492	2.12011	2.12997	2.11714	2.13263	2.12124	2.11934	2.11093	2.12725	2.13368	2.1366	2.15803	2.12308	2.13083	2.11832	2.12287	2.15108	2.12709	2.11434	2.1124	2.11152	2.13137	2.12508	2.14179	2.12511	2.1065	2.1233	2.12119	2.137	2.11215	2.11997	2.13822	2.15295	2.12529	2.14761	2.13471	2.12775	2.13936	2.11487	2.14647	2.13806	2.11809	2.1199	2.12028
49.4704		2.10753	2.15821	2.13217	2.10595	2.13329	2.11863	2.12822	2.11561	2.13113	2.11975	2.11783	2.10938	2.12566	2.13213	2.13497	2.15643	2.12154	2.12935	2.11675	2.12113	2.14948	2.12562	2.11292	2.11092	2.10991	2.12985	2.12358	2.14028	2.12374	2.10503	2.12184	2.11965	2.13549	2.11083	2.11849	2.13678	2.1513	2.1238	2.14595	2.13326	2.12609	2.1378	2.11338	2.1449	2.13654	2.11656	2.11825	2.11868
49.8726		2.106	2.15667	2.13069	2.10446	2.13169	2.1172	2.12651	2.11412	2.12966	2.11829	2.11634	2.10786	2.12411	2.13062	2.13332	2.15486	2.12003	2.12793	2.11522	2.11937	2.14792	2.1242	2.11159	2.10949	2.10834	2.12837	2.12213	2.13882	2.12241	2.10361	2.12045	2.11814	2.13402	2.10961	2.11707	2.13539	2.14969	2.12237	2.14432	2.13186	2.1244	2.13627	2.11193	2.14337	2.13507	2.11504	2.11658	2.1171
50.2748		2.10452	2.15519	2.12925	2.10299	2.13012	2.11584	2.12484	2.11266	2.12822	2.11687	2.11489	2.10638	2.12259	2.12915	2.13167	2.15332	2.11855	2.12657	2.11372	2.11759	2.1464	2.12283	2.11034	2.10811	2.1068	2.12692	2.12071	2.13738	2.12113	2.10224	2.11916	2.11667	2.13259	2.10847	2.1157	2.13404	2.14812	2.12099	2.14273	2.1305	2.1227	2.13476	2.11052	2.14187	2.13363	2.11356	2.1149	2.11554
50.677		2.10307	2.15376	2.12784	2.10153	2.12857	2.11452	2.12321	2.11124	2.12681	2.11548	2.11348	2.10493	2.1211	2.12771	2.13001	2.15182	2.11711	2.12527	2.11226	2.1158	2.14491	2.1215	2.10918	2.10678	2.10529	2.12551	2.11933	2.13597	2.11988	2.10091	2.11794	2.11523	2.1312	2.10743	2.11439	2.13275	2.1466	2.11966	2.14116	2.12918	2.12097	2.13329	2.10916	2.14039	2.13225	2.11211	2.11321	2.114
51.0792		2.10165	2.15236	2.12648	2.1001	2.12704	2.11326	2.12162	2.10985	2.12543	2.11412	2.11209	2.10351	2.11965	2.12631	2.12835	2.15036	2.11571	2.12404	2.11083	2.114	2.14347	2.12023	2.1081	2.10549	2.10382	2.12413	2.118	2.13459	2.11867	2.09962	2.1168	2.11383	2.12985	2.10647	2.11312	2.13151	2.14511	2.11838	2.13963	2.1279	2.11924	2.13184	2.10782	2.13895	2.13091	2.11069	2.11151	2.11249
51.4814		2.10028	2.15101	2.12516	2.09868	2.12554	2.11205	2.12005	2.1085	2.12408	2.11279	2.11075	2.10213	2.11823	2.12495	2.1267	2.14893	2.11435	2.12286	2.10943	2.11221	2.14205	2.119	2.10708	2.10424	2.10238	2.12278	2.11669	2.13322	2.1175	2.09836	2.11572	2.11246	2.12853	2.10558	2.1119	2.1303	2.14368	2.11714	2.13814	2.12665	2.11752	2.13043	2.10652	2.13754	2.12961	2.1093	2.10981	2.111
51.8836		2.09893	2.14969	2.12387	2.09729	2.12406	2.11087	2.11852	2.10717	2.12274	2.11148	2.10944	2.10078	2.11685	2.12361	2.12506	2.14753	2.11303	2.12173	2.10806	2.11043	2.14067	2.1178	2.10611	2.10303	2.10097	2.12146	2.11542	2.13188	2.11635	2.09713	2.1147	2.11111	2.12725	2.10473	2.11071	2.12913	2.14227	2.11593	2.13668	2.12542	2.11582	2.12905	2.10524	2.13616	2.12835	2.10795	2.10813	2.10954
52.2858		2.09762	2.14838	2.12261	2.09593	2.12261	2.10972	2.117	2.10586	2.12142	2.11021	2.10816	2.09947	2.11549	2.1223	2.12346	2.14616	2.11175	2.12064	2.10673	2.1087	2.13931	2.11663	2.10517	2.10185	2.09959	2.12017	2.11418	2.13056	2.11523	2.09591	2.1137	2.10979	2.12599	2.10391	2.10955	2.12799	2.14091	2.11474	2.13525	2.12422	2.11415	2.1277	2.10398	2.1348	2.12712	2.10664	2.10648	2.10812
52.688		2.09633	2.1471	2.12137	2.09461	2.12119	2.10857	2.11551	2.10458	2.12012	2.10896	2.10691	2.09818	2.11416	2.12101	2.12191	2.14481	2.11049	2.11957	2.10542	2.10703	2.13798	2.11548	2.10423	2.10068	2.09824	2.11891	2.11295	2.12925	2.11413	2.09471	2.11271	2.10849	2.12475	2.10309	2.10841	2.12686	2.13956	2.11356	2.13386	2.12303	2.11254	2.12637	2.10274	2.13348	2.12592	2.10536	2.10487	2.10673
53.0902		2.09507	2.14582	2.12015	2.09334	2.11979	2.10742	2.11402	2.10332	2.11883	2.10773	2.10569	2.09692	2.11286	2.11974	2.12042	2.14347	2.10927	2.1185	2.10413	2.10543	2.13666	2.11433	2.10328	2.09953	2.09692	2.11767	2.11174	2.12795	2.11303	2.09352	2.11171	2.1072	2.12353	2.10223	2.10729	2.12574	2.13824	2.11237	2.13249	2.12185	2.11101	2.12508	2.1015	2.13219	2.12473	2.10411	2.10332	2.10539
53.4924		2.09383	2.14454	2.11894	2.09211	2.11844	2.10625	2.11253	2.10207	2.11756	2.10653	2.10449	2.09567	2.11156	2.11848	2.11902	2.14216	2.10806	2.11743	2.10287	2.10395	2.13535	2.11317	2.10229	2.09837	2.09563	2.11646	2.11055	2.12668	2.11194	2.09232	2.11065	2.10593	2.12233	2.1013	2.10616	2.12461	2.13692	2.11117	2.13115	2.12067	2.10958	2.12381	2.10027	2.13093	2.12355	2.1029	2.10186	2.1041
53.8946		2.09261	2.14326	2.11774	2.09093	2.11712	2.10504	2.11105	2.10083	2.11631	2.10534	2.1033	2.09443	2.11028	2.11723	2.11772	2.14085	2.10687	2.11632	2.10164	2.10259	2.13404	2.11198	2.10122	2.0972	2.09437	2.11527	2.10935	2.12542	2.11084	2.09112	2.10951	2.10468	2.12114	2.10027	2.10502	2.12347	2.1356	2.10994	2.12982	2.11948	2.10828	2.12256	2.09903	2.1297	2.12237	2.10171	2.10051	2.10287
54.2968		2.09139	2.14197	2.11654	2.08981	2.11583	2.10377	2.10955	2.09959	2.11508	2.10417	2.10212	2.09321	2.109	2.11599	2.11654	2.13954	2.10567	2.11516	2.10042	2.10139	2.13273	2.11074	2.10005	2.09601	2.09314	2.1141	2.10816	2.12417	2.10972	2.0899	2.10827	2.10342	2.11996	2.0991	2.10385	2.12231	2.13428	2.10866	2.12851	2.11828	2.10711	2.12134	2.09777	2.12849	2.12118	2.10055	2.09929	2.10169
54.699		2.09018	2.14067	2.11534	2.08874	2.11459	2.10242	2.10804	2.09835	2.11387	2.103	2.10095	2.09198	2.10771	2.11475	2.11548	2.13824	2.10446	2.11393	2.09921	2.10034	2.1314	2.10944	2.09877	2.09479	2.09194	2.11294	2.10696	2.12294	2.10859	2.08866	2.1069	2.10218	2.11878	2.09776	2.10264	2.12111	2.13295	2.10733	2.12721	2.11706	2.10609	2.12013	2.09651	2.12731	2.11997	2.0994	2.09821	2.10059
55.1012		2.08896	2.13935	2.11412	2.08772	2.11337	2.10099	2.10651	2.0971	2.11267	2.10185	2.09978	2.09075	2.10642	2.1135	2.11455	2.13694	2.10325	2.11263	2.098	2.09946	2.13006	2.10806	2.09734	2.09354	2.09076	2.1118	2.10574	2.12171	2.10743	2.0874	2.10538	2.10093	2.11761	2.09625	2.10139	2.11989	2.1316	2.10594	2.12592	2.1158	2.10524	2.11895	2.09522	2.12615	2.11873	2.09826	2.09727	2.09954
55.5034		2.08774	2.13801	2.1129	2.08674	2.11219	2.09947	2.10496	2.09583	2.1115	2.10069	2.09861	2.08952	2.10511	2.11225	2.11373	2.13564	2.10201	2.11124	2.09679	2.09874	2.12871	2.1066	2.09578	2.09225	2.0896	2.11066	2.10451	2.12048	2.10625	2.0861	2.10373	2.09968	2.11644	2.09456	2.10008	2.11864	2.13025	2.10451	2.12464	2.11452	2.10453	2.11778	2.09391	2.12501	2.11746	2.09712	2.09647	2.09855
55.9056		2.0865	2.13666	2.11166	2.08579	2.11102	2.09788	2.1034	2.09456	2.11033	2.09953	2.09744	2.08827	2.1038	2.11099	2.11301	2.13434	2.10075	2.10978	2.09558	2.09814	2.12734	2.10508	2.0941	2.09093	2.08845	2.10953	2.10326	2.11925	2.10503	2.08479	2.10195	2.09843	2.11527	2.09272	2.09873	2.11735	2.12889	2.10302	2.12336	2.1132	2.10396	2.11662	2.09258	2.12389	2.11616	2.09598	2.0958	2.0976
56.3078		2.08525	2.13531	2.11041	2.08485	2.10988	2.09623	2.10182	2.09327	2.10918	2.09837	2.09626	2.08702	2.10247	2.10972	2.11236	2.13305	2.09949	2.10826	2.09434	2.09764	2.12597	2.10349	2.09231	2.08959	2.08731	2.1084	2.102	2.11802	2.1038	2.08345	2.10008	2.09718	2.1141	2.09075	2.09734	2.11605	2.12753	2.10151	2.12209	2.11186	2.10348	2.11549	2.09123	2.12278	2.11484	2.09483	2.09522	2.0967
56.71		2.08399	2.13395	2.10917	2.08392	2.10874	2.09454	2.10024	2.09199	2.10803	2.09721	2.09509	2.08575	2.10114	2.10844	2.11175	2.13176	2.09822	2.10671	2.0931	2.0972	2.12461	2.10188	2.09046	2.08824	2.08618	2.10727	2.10072	2.11679	2.10255	2.0821	2.09815	2.09592	2.11293	2.08871	2.09592	2.11474	2.12619	2.09998	2.12082	2.11051	2.10305	2.11437	2.08987	2.12168	2.11351	2.09367	2.09469	2.09581
57.1122		2.08273	2.1326	2.10793	2.08298	2.1076	2.09285	2.09867	2.09072	2.10689	2.09605	2.09393	2.08449	2.09982	2.10717	2.11114	2.13049	2.09696	2.10516	2.09186	2.09675	2.12326	2.10027	2.0886	2.0869	2.08505	2.10615	2.09945	2.11556	2.10131	2.08076	2.09621	2.09468	2.11176	2.08666	2.0945	2.11342	2.12486	2.09845	2.11957	2.10917	2.10262	2.11326	2.08851	2.12058	2.11219	2.09251	2.09418	2.09492
57.5144		2.08149	2.13127	2.10671	2.08203	2.10647	2.09121	2.09712	2.08946	2.10575	2.09491	2.09278	2.08324	2.09851	2.10592	2.11051	2.12923	2.09571	2.10364	2.09061	2.09627	2.12194	2.09869	2.08677	2.08558	2.08393	2.10503	2.09819	2.11435	2.10007	2.07945	2.09433	2.09346	2.11061	2.08467	2.09311	2.11213	2.12356	2.09696	2.11833	2.10785	2.10215	2.11217	2.08717	2.1195	2.11088	2.09135	2.09363	2.09404
57.9166		2.08026	2.12997	2.10553	2.08107	2.10534	2.08963	2.09562	2.08823	2.10463	2.09377	2.09165	2.082	2.09722	2.10468	2.10982	2.128	2.0945	2.10218	2.08938	2.0957	2.12066	2.09718	2.08504	2.08431	2.08282	2.10393	2.09697	2.11315	2.09887	2.07817	2.09254	2.09226	2.10947	2.08279	2.09176	2.11087	2.12231	2.09553	2.11712	2.10657	2.10159	2.11109	2.08586	2.11842	2.10961	2.09021	2.09302	2.09313
58.3188		2.07907	2.12872	2.10438	2.0801	2.10421	2.08816	2.09416	2.08704	2.10352	2.09266	2.09055	2.08079	2.09597	2.10349	2.10907	2.12681	2.09333	2.10082	2.08817	2.09502	2.11943	2.09576	2.08344	2.08309	2.08173	2.10283	2.09578	2.11199	2.09771	2.07696	2.09089	2.0911	2.10835	2.08108	2.09049	2.10966	2.12109	2.09417	2.11593	2.10534	2.10092	2.11002	2.0846	2.11735	2.10839	2.08909	2.09232	2.09221
58.721		2.07793	2.12753	2.10328	2.07913	2.10311	2.0868	2.09276	2.0859	2.10243	2.09159	2.08948	2.07962	2.09475	2.10234	2.10824	2.12565	2.09221	2.09955	2.087	2.09422	2.11825	2.09444	2.082	2.08195	2.08066	2.10177	2.09465	2.11086	2.09661	2.07582	2.08941	2.08998	2.10726	2.07957	2.0893	2.10852	2.11993	2.0929	2.11478	2.10419	2.10012	2.10896	2.08339	2.1163	2.10722	2.08801	2.09152	2.09127
59.1232		2.07684	2.12639	2.10224	2.07815	2.10202	2.08557	2.09143	2.08481	2.10136	2.09054	2.08844	2.0785	2.09359	2.10124	2.10734	2.12453	2.09113	2.0984	2.08587	2.09331	2.11713	2.09324	2.08074	2.08088	2.07961	2.10073	2.09358	2.10979	2.09557	2.07475	2.08811	2.08891	2.1062	2.07826	2.0882	2.10743	2.11881	2.09173	2.11367	2.10311	2.09922	2.10792	2.08225	2.11526	2.10612	2.08697	2.09063	2.09032
59.5254		2.0758	2.12532	2.10124	2.07719	2.10097	2.08446	2.09016	2.08377	2.10033	2.08954	2.08745	2.07742	2.09247	2.10019	2.10639	2.12345	2.0901	2.09736	2.08479	2.09228	2.11607	2.09214	2.07964	2.07988	2.0786	2.09972	2.09258	2.10876	2.09459	2.07375	2.08697	2.08788	2.10518	2.07715	2.08719	2.10642	2.11774	2.09065	2.1126	2.10211	2.09822	2.10689	2.08119	2.11425	2.10507	2.08596	2.08965	2.08936
59.9276		2.07483	2.1243	2.10029	2.07624	2.09995	2.08345	2.08896	2.08278	2.09934	2.08858	2.08649	2.0764	2.0914	2.09919	2.10539	2.12242	2.08911	2.09641	2.08375	2.09118	2.11506	2.09114	2.07869	2.07895	2.07762	2.09876	2.09162	2.10778	2.09367	2.07281	2.08599	2.0869	2.10419	2.07621	2.08625	2.10546	2.11671	2.08966	2.11156	2.10117	2.09716	2.10586	2.08018	2.11327	2.10408	2.085	2.08862	2.08839
60.3298		2.07389	2.12334	2.09938	2.07531	2.09896	2.08253	2.0878	2.08183	2.09838	2.08765	2.08557	2.07543	2.09038	2.09823	2.10438	2.12143	2.08816	2.09553	2.08276	2.09001	2.11409	2.09021	2.07785	2.07808	2.07666	2.09782	2.09071	2.10684	2.0928	2.07193	2.08514	2.08594	2.10324	2.0754	2.08537	2.10455	2.11572	2.08874	2.11056	2.1003	2.09606	2.10486	2.07924	2.11231	2.10313	2.08408	2.08755	2.08744
60.732		2.07299	2.12242	2.09851	2.0744	2.09801	2.08167	2.08669	2.0809	2.09746	2.08676	2.08469	2.07451	2.08939	2.09731	2.10336	2.12048	2.08722	2.09472	2.0818	2.08882	2.11315	2.08935	2.0771	2.07725	2.07573	2.09693	2.08984	2.10593	2.09197	2.07109	2.08438	2.08501	2.10231	2.07469	2.08453	2.10368	2.11474	2.08787	2.10959	2.09947	2.09496	2.10388	2.07834	2.11137	2.10223	2.08318	2.08646	2.08649
61.1342		2.07211	2.12153	2.09765	2.07351	2.09708	2.08084	2.0856	2.08	2.09656	2.0859	2.08384	2.07361	2.08845	2.09641	2.10235	2.11955	2.08631	2.09394	2.08086	2.08763	2.11224	2.08851	2.0764	2.07646	2.07481	2.09606	2.08898	2.10506	2.09117	2.07028	2.08367	2.08409	2.10141	2.07402	2.08372	2.10283	2.11379	2.08703	2.10864	2.09867	2.09387	2.10292	2.07748	2.11044	2.10135	2.08231	2.08537	2.08556
61.5364		2.07124	2.12066	2.09681	2.07264	2.09617	2.08002	2.08454	2.0791	2.09569	2.08507	2.08302	2.07275	2.08753	2.09552	2.10136	2.11865	2.08541	2.09317	2.07995	2.08647	2.11134	2.0877	2.07571	2.0757	2.07391	2.0952	2.08814	2.1042	2.09039	2.06949	2.083	2.08318	2.10053	2.07338	2.08292	2.10199	2.11285	2.08621	2.1077	2.0979	2.09282	2.10198	2.07664	2.10954	2.10048	2.08145	2.08431	2.08464
61.9386		2.07036	2.1198	2.09599	2.07178	2.09527	2.0792	2.08347	2.0782	2.09483	2.08424	2.08221	2.0719	2.08663	2.09465	2.1004	2.11777	2.08453	2.09241	2.07905	2.08534	2.11046	2.08688	2.07502	2.07496	2.07302	2.09436	2.08731	2.10335	2.08961	2.0687	2.08232	2.08226	2.09966	2.07272	2.08212	2.10116	2.11192	2.08539	2.10676	2.09714	2.09181	2.10108	2.07582	2.10864	2.09963	2.0806	2.08329	2.08374
62.3408		2.06948	2.11894	2.09517	2.07094	2.09438	2.07837	2.08241	2.0773	2.09399	2.08343	2.08142	2.07106	2.08576	2.09377	2.09947	2.11689	2.08365	2.09164	2.07817	2.08427	2.10959	2.08607	2.0743	2.07423	2.07213	2.09352	2.08648	2.10251	2.08883	2.06791	2.08163	2.08135	2.09882	2.07204	2.08131	2.10033	2.111	2.08456	2.10583	2.09638	2.09085	2.1002	2.075	2.10775	2.09879	2.07977	2.08231	2.08285
62.743		2.06859	2.11809	2.09437	2.07011	2.09349	2.07752	2.08135	2.0764	2.09316	2.08263	2.08064	2.07023	2.08489	2.0929	2.09858	2.11602	2.08278	2.09086	2.07728	2.08324	2.10872	2.08524	2.07356	2.0735	2.07125	2.09269	2.08565	2.10168	2.08805	2.06712	2.08092	2.08043	2.09799	2.07132	2.08049	2.0995	2.1101	2.08373	2.1049	2.09563	2.08994	2.09935	2.07418	2.10687	2.09795	2.07894	2.08137	2.08197
63.1452		2.0677	2.11723	2.09358	2.0693	2.0926	2.07667	2.08029	2.0755	2.09235	2.08183	2.07986	2.06941	2.08403	2.09203	2.09772	2.11515	2.08192	2.09007	2.0764	2.08226	2.10787	2.08441	2.0728	2.07278	2.07038	2.09185	2.08482	2.10085	2.08727	2.06632	2.08019	2.07953	2.09718	2.07058	2.07968	2.09867	2.10923	2.08289	2.10397	2.09489	2.08907	2.09852	2.07336	2.10599	2.09711	2.07813	2.08049	2.08111
63.5474		2.06681	2.11637	2.09281	2.0685	2.09173	2.07582	2.07923	2.07462	2.09154	2.08104	2.07908	2.06859	2.08317	2.09118	2.09688	2.11428	2.08107	2.08927	2.07551	2.08131	2.10703	2.08359	2.07203	2.07206	2.06954	2.09101	2.08399	2.10003	2.0865	2.06554	2.07946	2.07865	2.09639	2.06983	2.07886	2.09786	2.10837	2.08205	2.10306	2.09415	2.08823	2.09771	2.07254	2.10513	2.09628	2.07733	2.07964	2.08027
63.9496		2.06593	2.11552	2.09205	2.06774	2.09087	2.07498	2.07818	2.07375	2.09076	2.08025	2.07831	2.06778	2.08231	2.09034	2.09607	2.11343	2.08023	2.08848	2.07463	2.08038	2.1062	2.08277	2.07126	2.07135	2.06872	2.09017	2.08316	2.09922	2.08573	2.06476	2.07874	2.07779	2.09562	2.06906	2.07806	2.09706	2.10755	2.08122	2.10215	2.09343	2.0874	2.09691	2.07172	2.10428	2.09546	2.07654	2.07882	2.07945
64.3518		2.06507	2.11468	2.09132	2.06699	2.09004	2.07418	2.07715	2.0729	2.08999	2.07946	2.07755	2.06698	2.08146	2.08952	2.09529	2.1126	2.07941	2.08769	2.07376	2.07945	2.1054	2.08196	2.07051	2.07065	2.06794	2.08934	2.08235	2.09842	2.08499	2.06399	2.07803	2.07697	2.09487	2.06831	2.07728	2.09627	2.10676	2.0804	2.10126	2.09272	2.08658	2.09613	2.0709	2.10344	2.09465	2.07577	2.07803	2.07864
64.754		2.06424	2.11386	2.09062	2.06627	2.08924	2.0734	2.07614	2.07209	2.08923	2.07869	2.07679	2.0662	2.08061	2.08873	2.09452	2.11179	2.07861	2.08692	2.07288	2.07852	2.10462	2.08118	2.06979	2.06997	2.06718	2.08853	2.08154	2.09764	2.08426	2.06324	2.07735	2.07619	2.09413	2.06758	2.07653	2.09551	2.10599	2.07961	2.1004	2.09203	2.08575	2.09535	2.0701	2.10263	2.09384	2.07501	2.07724	2.07786
65.1562		2.06343	2.11307	2.08993	2.06558	2.08848	2.07267	2.07516	2.0713	2.08849	2.07793	2.07605	2.06544	2.07976	2.08797	2.09378	2.11102	2.07782	2.08618	2.07202	2.07756	2.10387	2.08042	2.06911	2.0693	2.06646	2.08773	2.08075	2.09687	2.08356	2.06252	2.07669	2.07544	2.09341	2.06688	2.0758	2.09477	2.10525	2.07885	2.09956	2.09136	2.08491	2.09459	2.0693	2.10184	2.09306	2.07426	2.07644	2.07709
65.5584		2.06266	2.11232	2.08926	2.0649	2.08775	2.07198	2.07421	2.07054	2.08776	2.07719	2.07531	2.06472	2.07892	2.08724	2.09305	2.11027	2.07706	2.08546	2.07118	2.07659	2.10314	2.07968	2.06847	2.06866	2.06576	2.08695	2.07997	2.09611	2.08289	2.06184	2.07605	2.07474	2.0927	2.0662	2.07511	2.09404	2.10453	2.07811	2.09874	2.09071	2.08407	2.09385	2.06853	2.10108	2.09228	2.07352	2.07563	2.07634
65.9606		2.06191	2.11161	2.08861	2.06423	2.08707	2.07131	2.0733	2.06981	2.08704	2.07647	2.07459	2.06402	2.07809	2.08653	2.09234	2.10956	2.07633	2.08478	2.07034	2.0756	2.10243	2.07897	2.06788	2.06804	2.06508	2.08619	2.07922	2.09537	2.08225	2.06119	2.07544	2.07406	2.09201	2.06557	2.07443	2.09334	2.10382	2.07741	2.09794	2.09008	2.08321	2.09313	2.06776	2.10033	2.09152	2.07279	2.0748	2.0756
66.3628		2.06119	2.11094	2.08797	2.06357	2.08641	2.07067	2.07242	2.06908	2.08632	2.07577	2.07388	2.06336	2.07729	2.08585	2.09165	2.10887	2.07562	2.08413	2.06953	2.07461	2.10174	2.07828	2.06732	2.06745	2.06441	2.08545	2.07849	2.09464	2.08163	2.06058	2.07485	2.07341	2.09134	2.06496	2.07378	2.09266	2.10312	2.07674	2.09717	2.08946	2.08234	2.09244	2.06702	2.0996	2.09078	2.07207	2.07394	2.07487
66.765		2.06049	2.11031	2.08734	2.06291	2.08578	2.07005	2.07157	2.06837	2.08561	2.07509	2.07319	2.06273	2.0765	2.08519	2.09098	2.1082	2.07494	2.0835	2.06873	2.07361	2.10107	2.07762	2.0668	2.06689	2.06374	2.08473	2.07779	2.09393	2.08105	2.06002	2.07428	2.07277	2.09069	2.06438	2.07313	2.092	2.10243	2.07609	2.0964	2.08886	2.08148	2.09177	2.06629	2.09888	2.09006	2.07136	2.07307	2.07415
67.1672		2.05981	2.1097	2.08671	2.06226	2.08514	2.06944	2.07074	2.06766	2.0849	2.07444	2.07251	2.06212	2.07575	2.08454	2.09031	2.10755	2.07429	2.08291	2.06795	2.07262	2.10042	2.07699	2.06631	2.06634	2.06307	2.08404	2.07711	2.09323	2.08048	2.05949	2.07373	2.07214	2.09006	2.06382	2.0725	2.09135	2.10175	2.07548	2.09566	2.08825	2.08061	2.09111	2.06558	2.09817	2.08936	2.07067	2.07218	2.07343
67.5694		2.05915	2.10912	2.08611	2.06162	2.08451	2.06884	2.06994	2.06695	2.08421	2.07382	2.07184	2.06153	2.07503	2.08391	2.08966	2.10691	2.07366	2.08234	2.06718	2.07164	2.09979	2.07639	2.06584	2.0658	2.06238	2.08337	2.07647	2.09254	2.07992	2.05898	2.0732	2.0715	2.08947	2.06329	2.07187	2.09072	2.10108	2.07489	2.09493	2.08766	2.07975	2.09047	2.06488	2.09747	2.08869	2.06998	2.07129	2.07272
67.9716		2.0585	2.10856	2.08552	2.06098	2.08385	2.06824	2.06914	2.06625	2.08353	2.07321	2.07118	2.06095	2.07434	2.08328	2.08902	2.10627	2.07305	2.08179	2.06643	2.07069	2.09917	2.07581	2.06538	2.06528	2.06169	2.08273	2.07586	2.09188	2.07938	2.0585	2.07271	2.07086	2.08889	2.06277	2.07125	2.09011	2.10042	2.07434	2.09422	2.08707	2.07889	2.08983	2.06421	2.09678	2.08803	2.06932	2.07042	2.07201
68.3738		2.05785	2.108	2.08495	2.06036	2.08318	2.06765	2.06836	2.06555	2.08287	2.07262	2.07054	2.06037	2.07367	2.08267	2.08838	2.10563	2.07245	2.08125	2.06569	2.06977	2.09857	2.07525	2.06491	2.06476	2.06099	2.08212	2.07527	2.09123	2.07885	2.05802	2.07224	2.07022	2.08835	2.06227	2.07064	2.08952	2.09979	2.0738	2.09352	2.08648	2.07804	2.08919	2.06355	2.0961	2.08739	2.06867	2.06957	2.07131
68.776		2.05722	2.10744	2.0844	2.05976	2.08249	2.06707	2.06758	2.06487	2.08224	2.07204	2.06991	2.05977	2.07301	2.08207	2.08776	2.105	2.07186	2.08073	2.06496	2.06887	2.09798	2.07471	2.06445	2.06425	2.06029	2.08153	2.0747	2.09061	2.07832	2.05754	2.07181	2.06956	2.08782	2.06178	2.07005	2.08893	2.09918	2.07329	2.09284	2.08591	2.0772	2.08854	2.06291	2.09544	2.08677	2.06803	2.06874	2.07061
69.1782		2.05659	2.10687	2.08388	2.05917	2.08179	2.0665	2.0668	2.0642	2.08164	2.07146	2.0693	2.05917	2.07236	2.08147	2.08715	2.10437	2.07126	2.08021	2.06425	2.068	2.09739	2.07418	2.06398	2.06374	2.05959	2.08097	2.07416	2.09	2.07779	2.05705	2.07141	2.06891	2.0873	2.0613	2.06948	2.08835	2.09861	2.07278	2.09218	2.08534	2.07638	2.08789	2.0623	2.0948	2.08616	2.06742	2.06795	2.06993
69.5804		2.05598	2.10629	2.08337	2.05859	2.08109	2.06596	2.06602	2.06356	2.08106	2.07087	2.06869	2.05855	2.0717	2.08087	2.08655	2.10376	2.07067	2.0797	2.06354	2.06715	2.0968	2.07366	2.0635	2.06323	2.0589	2.08042	2.07364	2.08942	2.07728	2.05655	2.07103	2.06826	2.0868	2.06083	2.06893	2.08778	2.09805	2.07229	2.09153	2.0848	2.07557	2.08722	2.06171	2.09418	2.08557	2.06682	2.06718	2.06924
69.9826		2.05539	2.10571	2.08287	2.05803	2.0804	2.06544	2.06524	2.06294	2.08052	2.07028	2.0681	2.05792	2.07102	2.08028	2.08597	2.10315	2.07007	2.07918	2.06285	2.06631	2.09621	2.07313	2.06302	2.06272	2.05822	2.07988	2.07313	2.08885	2.07677	2.05603	2.07067	2.06762	2.08629	2.06035	2.0684	2.0872	2.09752	2.07179	2.09089	2.08427	2.07479	2.08657	2.06115	2.09359	2.08499	2.06623	2.06645	2.06858
70.3848		2.05482	2.10512	2.08237	2.05748	2.07974	2.06494	2.06445	2.06233	2.08	2.06969	2.06752	2.05728	2.07032	2.07968	2.08542	2.10255	2.06946	2.07866	2.06217	2.0655	2.09561	2.07261	2.06254	2.06222	2.05757	2.07934	2.07263	2.0883	2.07628	2.05551	2.0703	2.06699	2.08578	2.05988	2.06788	2.08662	2.09699	2.07129	2.09027	2.08376	2.07405	2.08592	2.06061	2.09302	2.08441	2.06566	2.06574	2.06792
70.787		2.05427	2.10452	2.08188	2.05693	2.07911	2.06446	2.06365	2.06175	2.07952	2.06909	2.06696	2.05664	2.06961	2.07908	2.08489	2.10195	2.06884	2.07813	2.06151	2.0647	2.095	2.07209	2.06206	2.06171	2.05695	2.0788	2.07213	2.08775	2.07579	2.05497	2.06991	2.06638	2.08527	2.05938	2.06737	2.08604	2.09647	2.07078	2.08967	2.08327	2.07337	2.08529	2.06009	2.09246	2.08385	2.06511	2.06506	2.0673
71.1892		2.05375	2.10392	2.08138	2.05639	2.07851	2.06398	2.06285	2.06117	2.07906	2.06849	2.06642	2.05602	2.06888	2.07847	2.0844	2.10136	2.06821	2.07758	2.06087	2.06393	2.09439	2.07158	2.06156	2.0612	2.05636	2.07824	2.07163	2.08721	2.07531	2.05443	2.0695	2.06579	2.08474	2.05886	2.06686	2.08546	2.09595	2.07027	2.0891	2.08279	2.07273	2.08469	2.05958	2.09191	2.08328	2.06457	2.0644	2.0667
71.5914		2.05324	2.10332	2.08087	2.05586	2.07794	2.06349	2.06204	2.0606	2.07863	2.06789	2.06589	2.0554	2.06813	2.07784	2.08394	2.10078	2.06756	2.07701	2.06024	2.06319	2.09378	2.07106	2.06104	2.06066	2.05579	2.07767	2.0711	2.08666	2.07482	2.05388	2.06904	2.06521	2.08421	2.05829	2.06633	2.08486	2.09541	2.06974	2.08854	2.08232	2.07216	2.08411	2.05907	2.09135	2.0827	2.06403	2.06377	2.06615
71.9936		2.05273	2.10272	2.08035	2.05533	2.0774	2.06297	2.06122	2.06002	2.07821	2.0673	2.06536	2.0548	2.06738	2.07721	2.08353	2.10019	2.0669	2.07641	2.05961	2.0625	2.09317	2.07053	2.06048	2.06011	2.05524	2.07708	2.07055	2.0861	2.07433	2.05333	2.06853	2.06465	2.08366	2.05767	2.06578	2.08426	2.09487	2.06921	2.08799	2.08185	2.07166	2.08356	2.05855	2.09078	2.08211	2.0635	2.06318	2.06564
72.3958		2.05222	2.10211	2.07982	2.05481	2.07687	2.06239	2.06039	2.05943	2.07781	2.06672	2.06484	2.05421	2.06663	2.07658	2.08315	2.09962	2.06623	2.07578	2.05899	2.06185	2.09256	2.06999	2.05986	2.05952	2.05468	2.07648	2.06996	2.08554	2.07383	2.05276	2.06794	2.06409	2.0831	2.05698	2.0652	2.08365	2.09433	2.06866	2.08746	2.08138	2.07122	2.08301	2.05802	2.0902	2.0815	2.06296	2.06263	2.06517
72.798		2.0517	2.1015	2.07929	2.0543	2.07636	2.06175	2.05955	2.05884	2.07741	2.06615	2.06432	2.05364	2.06588	2.07596	2.08281	2.09905	2.06554	2.0751	2.05835	2.06126	2.09195	2.06944	2.05917	2.0589	2.05411	2.07588	2.06933	2.08497	2.07331	2.05219	2.06728	2.06354	2.08253	2.05621	2.06458	2.08303	2.09378	2.06809	2.08692	2.0809	2.07084	2.08248	2.05747	2.08961	2.08087	2.06242	2.06214	2.06473
73.2002		2.05116	2.10087	2.07876	2.0538	2.07585	2.06103	2.05869	2.05823	2.077	2.0656	2.06378	2.05308	2.06512	2.07534	2.0825	2.0985	2.06486	2.07437	2.05771	2.06074	2.09134	2.06886	2.0584	2.05826	2.05352	2.07529	2.06867	2.08441	2.07276	2.05162	2.06655	2.063	2.08195	2.05536	2.06393	2.08241	2.09326	2.0675	2.08638	2.08039	2.0705	2.08195	2.0569	2.08901	2.08022	2.06186	2.06169	2.06433
73.6024		2.0506	2.10024	2.07822	2.05332	2.07534	2.06024	2.05783	2.0576	2.07657	2.06506	2.06323	2.05255	2.06437	2.07474	2.08221	2.09797	2.06419	2.0736	2.05705	2.06027	2.09074	2.06825	2.05757	2.05761	2.05291	2.07472	2.06799	2.08386	2.0722	2.05104	2.06576	2.06246	2.08137	2.05443	2.06326	2.08179	2.09275	2.06689	2.08583	2.07987	2.0702	2.08141	2.0563	2.08842	2.07955	2.06129	2.0613	2.06393
74.0046		2.05002	2.09959	2.07768	2.05285	2.07483	2.05941	2.05696	2.05697	2.07611	2.06454	2.06266	2.05204	2.06362	2.07416	2.08194	2.09746	2.06354	2.07281	2.05639	2.05984	2.09013	2.0676	2.05669	2.05696	2.0523	2.07418	2.0673	2.08333	2.07162	2.05046	2.06492	2.06192	2.08078	2.05344	2.06259	2.08118	2.09227	2.06627	2.08526	2.07931	2.06992	2.08087	2.05568	2.08783	2.0789	2.06071	2.06097	2.06354
74.4068		2.04942	2.09895	2.07714	2.05241	2.07433	2.05856	2.05609	2.05632	2.07562	2.06404	2.06207	2.05155	2.0629	2.07359	2.08167	2.09697	2.06291	2.07201	2.05573	2.05945	2.08954	2.06693	2.05578	2.05633	2.05169	2.07368	2.06661	2.08283	2.07103	2.0499	2.06407	2.0614	2.0802	2.05241	2.06194	2.08059	2.0918	2.06562	2.08469	2.07873	2.06965	2.08032	2.05505	2.08728	2.07827	2.06012	2.06066	2.06313
74.809		2.04881	2.09831	2.07658	2.05198	2.07383	2.05771	2.05524	2.05568	2.07511	2.06355	2.06146	2.05109	2.06219	2.07305	2.0814	2.09649	2.06232	2.07122	2.05508	2.05906	2.08895	2.06625	2.05487	2.05574	2.05111	2.07321	2.06594	2.08237	2.07044	2.04935	2.06321	2.06088	2.07962	2.05136	2.06132	2.08002	2.09136	2.06497	2.0841	2.07814	2.06937	2.07978	2.05442	2.08675	2.07768	2.05954	2.06039	2.0627
75.2112		2.0482	2.09767	2.07602	2.05157	2.07333	2.05689	2.05442	2.05503	2.07457	2.06307	2.06084	2.05065	2.06152	2.07252	2.08112	2.09603	2.06176	2.07047	2.05447	2.05867	2.08839	2.06556	2.05398	2.0552	2.05055	2.07278	2.0653	2.08194	2.06986	2.04882	2.06238	2.06036	2.07905	2.05034	2.06075	2.07948	2.09093	2.06432	2.08351	2.07756	2.06907	2.07925	2.05381	2.08625	2.07714	2.05898	2.06011	2.06224
75.6134		2.0476	2.09704	2.07544	2.05117	2.07285	2.05612	2.05363	2.05438	2.07401	2.06261	2.06021	2.05022	2.06089	2.072	2.08082	2.09557	2.06122	2.06978	2.05388	2.05823	2.08786	2.06488	2.05312	2.0547	2.05003	2.07237	2.0647	2.08153	2.06929	2.04832	2.06158	2.05985	2.07849	2.04936	2.06025	2.07897	2.0905	2.06367	2.08291	2.07699	2.06873	2.07873	2.05322	2.08579	2.07665	2.05843	2.05983	2.06175
76.0156		2.04702	2.09643	2.07486	2.05079	2.07238	2.05541	2.05288	2.05373	2.07345	2.06214	2.05959	2.0498	2.06029	2.0715	2.08049	2.09512	2.06069	2.06914	2.05333	2.05774	2.08737	2.06424	2.05231	2.05426	2.04954	2.07198	2.06415	2.08113	2.06874	2.04784	2.06085	2.05932	2.07792	2.04844	2.05981	2.07847	2.09006	2.06302	2.0823	2.07645	2.06836	2.07822	2.05265	2.08536	2.07621	2.05792	2.05953	2.06124
76.4178		2.04645	2.09584	2.07427	2.05041	2.07191	2.05476	2.05217	2.05309	2.0729	2.06168	2.05897	2.04937	2.05974	2.07101	2.08014	2.09468	2.06018	2.06856	2.05281	2.05718	2.08691	2.06364	2.05155	2.05384	2.04906	2.0716	2.06364	2.08074	2.06821	2.04739	2.06018	2.0588	2.07735	2.04759	2.05943	2.07798	2.08962	2.0624	2.08167	2.07596	2.06795	2.07774	2.05211	2.08495	2.0758	2.05743	2.05919	2.0607
76.82		2.04591	2.09526	2.07369	2.05002	2.07146	2.05417	2.0515	2.05245	2.07235	2.06121	2.05838	2.04893	2.05922	2.07055	2.07976	2.09425	2.05967	2.06804	2.05232	2.05655	2.08649	2.0631	2.05083	2.05345	2.04858	2.07123	2.06319	2.08034	2.0677	2.04696	2.05958	2.05827	2.07677	2.0468	2.05909	2.07748	2.08916	2.0618	2.08101	2.0755	2.06751	2.07727	2.0516	2.08455	2.0754	2.05697	2.05882	2.06014
77.2222		2.04538	2.09472	2.07313	2.04964	2.07102	2.05362	2.05086	2.05183	2.07183	2.06072	2.05781	2.04848	2.05873	2.07011	2.07937	2.09383	2.05917	2.06754	2.05183	2.05585	2.08611	2.06261	2.05016	2.05306	2.04809	2.07085	2.06277	2.07994	2.06721	2.04654	2.05906	2.05776	2.07617	2.04608	2.05877	2.07698	2.08871	2.06122	2.08034	2.07508	2.06704	2.07681	2.05111	2.08415	2.07499	2.05653	2.05841	2.05958
77.6244		2.04487	2.09419	2.07259	2.04925	2.07058	2.05312	2.05026	2.05123	2.07133	2.06022	2.05727	2.04801	2.05828	2.0697	2.07897	2.09341	2.05868	2.06707	2.05134	2.05509	2.08575	2.06217	2.04953	2.05267	2.04756	2.07047	2.06239	2.07955	2.06674	2.04614	2.05861	2.05726	2.07557	2.04539	2.05843	2.07646	2.08827	2.06069	2.07964	2.07468	2.06656	2.07637	2.05063	2.08376	2.07457	2.0561	2.05798	2.05902
78.0266		2.04436	2.09369	2.0721	2.04886	2.07014	2.05264	2.04968	2.05066	2.07085	2.0597	2.05676	2.04753	2.05785	2.06931	2.07857	2.093	2.05819	2.06662	2.05085	2.0543	2.0854	2.06173	2.04893	2.05226	2.04699	2.07009	2.06204	2.07916	2.06628	2.04576	2.05822	2.0568	2.07497	2.04473	2.05807	2.07592	2.08785	2.0602	2.07894	2.07429	2.06607	2.07595	2.05016	2.08336	2.07411	2.05567	2.05752	2.05846
78.4288		2.04386	2.09321	2.07163	2.04846	2.06969	2.05219	2.04912	2.05013	2.07039	2.05915	2.05627	2.04705	2.05743	2.06896	2.07818	2.09259	2.05772	2.06619	2.05036	2.0535	2.08505	2.06129	2.04835	2.05183	2.04638	2.0697	2.06171	2.07878	2.06582	2.04539	2.05789	2.05637	2.07437	2.04409	2.05765	2.07537	2.08746	2.05976	2.07823	2.07389	2.06558	2.07553	2.04969	2.08296	2.07363	2.05522	2.05704	2.05791
78.831		2.04335	2.09273	2.07119	2.04807	2.06925	2.05176	2.04857	2.04963	2.06997	2.05857	2.0558	2.04655	2.05702	2.06863	2.0778	2.09218	2.05725	2.06576	2.04987	2.05274	2.08468	2.06081	2.04779	2.05138	2.04574	2.0693	2.06139	2.07842	2.06537	2.04503	2.05758	2.05597	2.07378	2.04347	2.05717	2.07483	2.0871	2.05937	2.07754	2.07347	2.06508	2.07512	2.04922	2.08256	2.07312	2.05475	2.05654	2.05738
79.2332		2.04284	2.09226	2.07075	2.04767	2.0688	2.05132	2.04803	2.04917	2.06956	2.05796	2.05534	2.04604	2.05659	2.06831	2.07744	2.09175	2.05678	2.06535	2.04937	2.05202	2.0843	2.06027	2.04724	2.05091	2.04507	2.06889	2.06108	2.07807	2.06491	2.04468	2.05728	2.0556	2.07321	2.04286	2.05662	2.07428	2.08678	2.05902	2.07688	2.07303	2.06457	2.07471	2.04875	2.08215	2.07258	2.05424	2.05604	2.05686
79.6354		2.04232	2.09179	2.0703	2.04728	2.06835	2.05088	2.0475	2.04873	2.06919	2.05734	2.05488	2.04551	2.05613	2.06798	2.07708	2.09131	2.05631	2.06495	2.04888	2.05137	2.0839	2.05964	2.04669	2.05041	2.04438	2.06848	2.06076	2.07771	2.06446	2.04433	2.05695	2.05523	2.07266	2.04226	2.05601	2.07375	2.08649	2.0587	2.07624	2.07258	2.06404	2.0743	2.04827	2.08175	2.07203	2.05368	2.05551	2.05637
80.0376		2.04179	2.09131	2.06982	2.04688	2.0679	2.05041	2.04697	2.0483	2.06884	2.05671	2.05441	2.04496	2.05563	2.06762	2.07673	2.09084	2.05584	2.06455	2.0484	2.05078	2.08348	2.05896	2.04615	2.04987	2.04366	2.06806	2.06044	2.07733	2.064	2.04397	2.05659	2.05486	2.07211	2.04168	2.05535	2.07324	2.0862	2.0584	2.07563	2.07212	2.06351	2.07387	2.04778	2.08136	2.07146	2.05308	2.05498	2.05589
80.4398		2.04125	2.09081	2.0693	2.04646	2.06747	2.04992	2.04645	2.04784	2.06852	2.05609	2.05393	2.04437	2.05509	2.06721	2.07637	2.09035	2.05538	2.06414	2.04793	2.05026	2.08305	2.05822	2.04562	2.0493	2.04292	2.06763	2.06011	2.07692	2.06354	2.04359	2.05619	2.05446	2.07157	2.04112	2.05465	2.07276	2.08591	2.05809	2.07504	2.07167	2.06296	2.07343	2.04728	2.08098	2.07088	2.05244	2.05442	2.05543
80.842		2.04072	2.09029	2.06875	2.04603	2.06706	2.04938	2.04595	2.04737	2.0682	2.05551	2.05343	2.04374	2.05452	2.06674	2.07599	2.08984	2.05493	2.0637	2.04747	2.04978	2.0826	2.05748	2.0451	2.0487	2.04217	2.06719	2.05978	2.07648	2.06308	2.04321	2.05576	2.05403	2.07102	2.04056	2.05395	2.0723	2.0856	2.05777	2.07446	2.07123	2.06241	2.07297	2.0468	2.08061	2.07031	2.05177	2.05385	2.05498
81.2442		2.04017	2.08975	2.06819	2.04557	2.06667	2.04882	2.04546	2.04686	2.06789	2.05499	2.0529	2.04309	2.05392	2.0662	2.07558	2.08931	2.0545	2.06322	2.04703	2.04932	2.08215	2.05678	2.04462	2.04809	2.0414	2.06673	2.05944	2.076	2.06264	2.04283	2.0553	2.05356	2.07048	2.04001	2.05325	2.07186	2.08524	2.05743	2.07388	2.07082	2.06185	2.07249	2.04632	2.08024	2.06975	2.05109	2.05327	2.05455
81.6464		2.03963	2.08919	2.06763	2.04509	2.0663	2.04824	2.04501	2.04633	2.06756	2.05452	2.05236	2.04243	2.05334	2.0656	2.07515	2.08876	2.05412	2.06269	2.04661	2.04885	2.08168	2.05616	2.04419	2.04748	2.04064	2.06624	2.0591	2.07549	2.0622	2.04247	2.05485	2.05306	2.06992	2.03945	2.05258	2.07144	2.08484	2.05705	2.07329	2.07042	2.06131	2.072	2.04587	2.07987	2.06922	2.05042	2.05269	2.05411
82.0485		2.03908	2.08862	2.0671	2.0446	2.06594	2.04767	2.04458	2.0458	2.06721	2.05411	2.05179	2.04177	2.05279	2.06495	2.07468	2.08819	2.05378	2.06213	2.04621	2.04836	2.0812	2.05565	2.04381	2.04689	2.03988	2.06572	2.05876	2.07497	2.06176	2.04214	2.05442	2.05255	2.06936	2.03888	2.05196	2.07104	2.08439	2.05666	2.07271	2.07003	2.06077	2.07151	2.04546	2.07949	2.06872	2.04977	2.05209	2.05367
82.4507		2.03852	2.08803	2.06662	2.04409	2.0656	2.04715	2.04418	2.04529	2.06681	2.05375	2.05122	2.04114	2.0523	2.06428	2.07418	2.08763	2.05347	2.06153	2.04583	2.04782	2.08069	2.05527	2.0435	2.04635	2.03916	2.06517	2.05842	2.07445	2.06133	2.04186	2.05401	2.05202	2.06878	2.03832	2.0514	2.07064	2.0839	2.05626	2.07214	2.06965	2.06024	2.07103	2.04508	2.07908	2.06828	2.04915	2.05149	2.0532
82.8529		2.03798	2.08745	2.0662	2.04358	2.06525	2.0467	2.04381	2.04481	2.06638	2.05341	2.05064	2.04055	2.05188	2.06361	2.07365	2.08706	2.0532	2.06092	2.04547	2.04724	2.08016	2.05499	2.04325	2.04586	2.03847	2.06458	2.05808	2.07395	2.06089	2.04163	2.05364	2.0515	2.06819	2.03777	2.0509	2.07026	2.08338	2.05585	2.07158	2.06925	2.0597	2.07057	2.04476	2.07865	2.06788	2.04857	2.05087	2.05268
83.2551		2.03745	2.08687	2.06581	2.04307	2.06489	2.04636	2.04345	2.04438	2.0659	2.05308	2.05006	2.04001	2.05153	2.06297	2.07311	2.08651	2.05292	2.06033	2.04514	2.04662	2.0796	2.05479	2.04305	2.04543	2.03782	2.06397	2.05771	2.07347	2.06042	2.04145	2.0533	2.05098	2.06757	2.03726	2.05045	2.06989	2.08285	2.05544	2.07106	2.06885	2.05915	2.07013	2.04448	2.0782	2.06753	2.04803	2.05023	2.0521
83.6573		2.03695	2.08631	2.06543	2.04258	2.06452	2.04613	2.04311	2.04401	2.0654	2.05273	2.0495	2.03953	2.05123	2.06238	2.07257	2.08599	2.05262	2.05978	2.04482	2.04596	2.07901	2.05462	2.04288	2.04505	2.03721	2.06334	2.05731	2.07303	2.05993	2.04131	2.05297	2.05046	2.06692	2.03682	2.05004	2.06953	2.08233	2.05504	2.07057	2.06845	2.05856	2.06971	2.04423	2.07773	2.06718	2.04753	2.04955	2.05145
84.0595		2.0365	2.08575	2.06505	2.04209	2.06413	2.04602	2.04276	2.04367	2.06487	2.05234	2.04895	2.03908	2.05097	2.06185	2.07203	2.08552	2.05227	2.05929	2.04451	2.04529	2.07841	2.05444	2.04274	2.04469	2.03662	2.06272	2.05688	2.07263	2.0594	2.04119	2.05266	2.04994	2.06624	2.03648	2.04965	2.06918	2.08181	2.05464	2.07012	2.06807	2.05793	2.06931	2.04399	2.07726	2.06682	2.04707	2.04884	2.05073
84.4617		2.0361	2.08519	2.06463	2.04162	2.06371	2.04599	2.04239	2.04335	2.06435	2.05192	2.04843	2.03864	2.05071	2.06138	2.07149	2.08509	2.05185	2.05886	2.04419	2.04462	2.07781	2.05422	2.0426	2.04434	2.03606	2.06213	2.05639	2.07226	2.05886	2.04106	2.05236	2.04941	2.06554	2.03625	2.04926	2.06882	2.08131	2.05424	2.06969	2.06771	2.05725	2.06893	2.04374	2.07679	2.06642	2.04664	2.04809	2.04997
84.8639		2.03575	2.08462	2.06416	2.04116	2.06327	2.04601	2.04198	2.04305	2.06386	2.05146	2.04793	2.03821	2.05042	2.06097	2.07096	2.08473	2.05138	2.0585	2.04384	2.04396	2.07724	2.05395	2.04246	2.04396	2.03551	2.06158	2.05586	2.0719	2.05833	2.0409	2.05207	2.04888	2.06486	2.03613	2.04885	2.06846	2.08084	2.05384	2.06929	2.06739	2.05654	2.06856	2.04346	2.07632	2.06594	2.04625	2.04732	2.04918
85.2661		2.03545	2.08404	2.06364	2.04069	2.0628	2.04602	2.04151	2.04274	2.0634	2.05099	2.04745	2.03776	2.0501	2.06059	2.07043	2.08443	2.05086	2.05818	2.04343	2.04331	2.07671	2.05361	2.04232	2.04356	2.03496	2.06109	2.0553	2.07156	2.05781	2.0407	2.05182	2.04835	2.0642	2.03611	2.04841	2.06809	2.08041	2.05345	2.0689	2.06712	2.05582	2.06819	2.04313	2.07586	2.06539	2.04591	2.04656	2.0484
85.6683		2.03516	2.08343	2.0631	2.04021	2.06231	2.04595	2.04098	2.04243	2.06299	2.05052	2.04699	2.03728	2.04972	2.06023	2.0699	2.08416	2.05033	2.0579	2.04295	2.04269	2.07623	2.05324	2.04219	2.04313	2.03443	2.06066	2.05471	2.0712	2.05735	2.04044	2.0516	2.04781	2.0636	2.03617	2.04794	2.06771	2.08002	2.05305	2.06852	2.06687	2.05511	2.0678	2.04274	2.07539	2.06477	2.04561	2.04584	2.04766
86.0705		2.03485	2.08277	2.06253	2.03971	2.06178	2.04574	2.04038	2.04211	2.06262	2.05007	2.04653	2.03676	2.04929	2.05987	2.06935	2.08391	2.0498	2.05762	2.04237	2.0421	2.07581	2.05284	2.04206	2.04267	2.03392	2.06029	2.05412	2.07082	2.05694	2.04012	2.05142	2.04728	2.06306	2.03625	2.04743	2.06731	2.07968	2.05264	2.06814	2.06662	2.05444	2.06739	2.04228	2.07488	2.06411	2.04535	2.04519	2.04699
86.4727		2.03445	2.08208	2.06197	2.03919	2.06122	2.04537	2.03972	2.04178	2.06229	2.04966	2.04607	2.03622	2.0488	2.0595	2.06879	2.08362	2.04929	2.05732	2.0417	2.04155	2.07542	2.05242	2.04194	2.0422	2.03342	2.05997	2.05353	2.07039	2.0566	2.03973	2.05126	2.04675	2.0626	2.03629	2.04689	2.0669	2.07937	2.05223	2.06775	2.06633	2.05384	2.06694	2.04174	2.07432	2.06343	2.0451	2.04462	2.04639
86.8749		2.03394	2.08133	2.06141	2.03863	2.06061	2.04479	2.03899	2.04141	2.06197	2.0493	2.04558	2.03565	2.04825	2.05909	2.06822	2.08328	2.04879	2.05697	2.04094	2.04103	2.07503	2.05198	2.04178	2.04173	2.03294	2.05967	2.05296	2.06989	2.05631	2.03926	2.05109	2.04621	2.06217	2.03621	2.04631	2.06647	2.07907	2.05178	2.06733	2.06596	2.05333	2.06644	2.04114	2.07367	2.06275	2.04484	2.04412	2.04585
87.2771		2.03329	2.08052	2.06084	2.03804	2.05995	2.04404	2.0382	2.04099	2.06163	2.04897	2.04504	2.03506	2.04764	2.05863	2.06765	2.08283	2.04829	2.05654	2.04011	2.04055	2.0746	2.0515	2.04156	2.04126	2.03246	2.05935	2.05238	2.06931	2.05601	2.03868	2.05085	2.04564	2.06174	2.03597	2.04571	2.06603	2.07873	2.05128	2.06685	2.06548	2.0529	2.06586	2.04048	2.07291	2.06209	2.04453	2.04369	2.04536
87.6793		2.03248	2.07966	2.06023	2.03742	2.05925	2.04313	2.03736	2.04048	2.06123	2.04867	2.04444	2.03446	2.04696	2.05812	2.06709	2.08228	2.04773	2.056	2.03925	2.04011	2.07408	2.05097	2.04123	2.04078	2.03198	2.05899	2.05179	2.06866	2.05567	2.03798	2.05053	2.04503	2.06125	2.03552	2.04507	2.06555	2.07833	2.05071	2.06628	2.06487	2.05257	2.06519	2.03975	2.07203	2.06146	2.04414	2.04328	2.04489
88.0815		2.03157	2.07875	2.05953	2.03677	2.0585	2.04212	2.03646	2.03986	2.06075	2.04838	2.04378	2.03384	2.04623	2.05757	2.06656	2.08162	2.04709	2.05536	2.03841	2.03971	2.07345	2.05036	2.04076	2.04028	2.03147	2.05855	2.05116	2.06795	2.05525	2.03715	2.05008	2.04435	2.06067	2.03487	2.04442	2.06505	2.07781	2.05005	2.06558	2.06414	2.05231	2.06445	2.03897	2.07105	2.06087	2.04362	2.04285	2.04441
88.4837		2.03061	2.07781	2.05872	2.03611	2.05773	2.04108	2.03553	2.03913	2.06017	2.04808	2.04309	2.03322	2.04545	2.05696	2.06607	2.08089	2.04635	2.05462	2.03763	2.03936	2.07271	2.04968	2.04014	2.03973	2.03093	2.058	2.05049	2.06722	2.05471	2.0362	2.04952	2.0436	2.05997	2.03405	2.04376	2.0645	2.07714	2.04929	2.06475	2.0633	2.05212	2.06362	2.03814	2.06999	2.06033	2.04298	2.04238	2.0439
88.8859		2.02969	2.07688	2.05777	2.03544	2.05695	2.04009	2.03457	2.0383	2.05949	2.04778	2.04239	2.03259	2.04467	2.05632	2.06563	2.08012	2.0455	2.05379	2.03695	2.03903	2.07187	2.04894	2.03939	2.03913	2.03036	2.05734	2.04978	2.06651	2.05406	2.03517	2.04888	2.04277	2.05915	2.03311	2.04311	2.06393	2.07633	2.04846	2.06382	2.06238	2.05196	2.06275	2.0373	2.06889	2.05987	2.04223	2.04185	2.04336
89.2881		2.02892	2.076	2.05668	2.03478	2.05618	2.03919	2.0336	2.03743	2.05873	2.04747	2.04176	2.03198	2.04393	2.05566	2.06524	2.07937	2.04456	2.05292	2.03638	2.03872	2.07098	2.04816	2.03855	2.03846	2.02975	2.05657	2.04906	2.06588	2.05332	2.03411	2.04819	2.04189	2.05824	2.03214	2.0425	2.06333	2.0754	2.04759	2.06282	2.06141	2.05181	2.06185	2.03646	2.06782	2.05951	2.04141	2.0413	2.04279
89.6903		2.02836	2.07524	2.0555	2.03412	2.05542	2.03842	2.03264	2.03659	2.0579	2.04715	2.04125	2.03141	2.04328	2.05499	2.06488	2.07868	2.04359	2.05206	2.03594	2.03841	2.0701	2.04736	2.03767	2.03773	2.02911	2.05571	2.04837	2.06535	2.05256	2.03312	2.04751	2.04099	2.05728	2.03123	2.04191	2.06274	2.0744	2.04671	2.06183	2.06044	2.05164	2.06097	2.03568	2.06683	2.05927	2.04058	2.04075	2.04219
90.0925		2.02803	2.07463	2.05427	2.03346	2.05467	2.03779	2.03171	2.03584	2.05705	2.04682	2.04092	2.0309	2.04276	2.05432	2.06453	2.07806	2.04264	2.05125	2.0356	2.0381	2.06928	2.04657	2.0368	2.03693	2.02843	2.05478	2.04775	2.06495	2.05183	2.03225	2.04685	2.0401	2.05633	2.03043	2.04136	2.06217	2.07339	2.04587	2.0609	2.0595	2.0514	2.06014	2.03497	2.06599	2.05915	2.0398	2.04025	2.04159
90.4947		2.0279	2.07421	2.05307	2.03278	2.05394	2.03728	2.03082	2.03523	2.05618	2.04647	2.04078	2.03047	2.04239	2.05367	2.06416	2.07752	2.04176	2.05052	2.03534	2.03777	2.06855	2.04579	2.03594	2.0361	2.02771	2.05383	2.04724	2.06465	2.05119	2.03154	2.04624	2.03925	2.05542	2.02981	2.04082	2.06165	2.07246	2.04509	2.06007	2.05863	2.05106	2.05938	2.03435	2.06534	2.05913	2.0391	2.03983	2.04099
90.8969		2.02789	2.07395	2.05198	2.03209	2.05321	2.03683	2.02999	2.03476	2.05533	2.04609	2.04083	2.03011	2.04215	2.05303	2.06377	2.07703	2.04098	2.04991	2.03511	2.03742	2.06792	2.045	2.03509	2.03522	2.02693	2.05287	2.04685	2.06441	2.05067	2.031	2.04566	2.03847	2.05457	2.02936	2.04027	2.06117	2.07167	2.04435	2.05937	2.05785	2.05058	2.05872	2.03382	2.06489	2.05916	2.03851	2.03953	2.04041
91.2991		2.02788	2.07381	2.05105	2.03135	2.05246	2.0364	2.02921	2.03439	2.05451	2.04564	2.041	2.02982	2.04198	2.05239	2.06333	2.07655	2.04032	2.0494	2.03489	2.03706	2.06735	2.04417	2.03419	2.03431	2.02609	2.05195	2.04656	2.06416	2.05029	2.03058	2.04508	2.03776	2.05377	2.02907	2.03969	2.06072	2.07104	2.04365	2.05877	2.05717	2.04997	2.05815	2.03337	2.0646	2.05918	2.03802	2.03932	2.03981
91.7013		2.02774	2.0737	2.05034	2.03057	2.05171	2.03593	2.02846	2.03407	2.05373	2.04512	2.04123	2.02955	2.0418	2.05175	2.06284	2.07603	2.03976	2.04897	2.03466	2.03667	2.06679	2.04329	2.03321	2.03336	2.02521	2.05108	2.04632	2.06383	2.05002	2.03022	2.04447	2.03713	2.053	2.02889	2.03909	2.06027	2.07059	2.04292	2.05824	2.0566	2.04924	2.05768	2.03295	2.06442	2.05913	2.0376	2.03918	2.03919
92.1035		2.02738	2.07351	2.04986	2.02976	2.05093	2.03538	2.02773	2.03373	2.05298	2.0445	2.04141	2.02928	2.04152	2.05109	2.0623	2.07545	2.03931	2.04857	2.0344	2.03625	2.06619	2.04236	2.0321	2.03236	2.02431	2.05027	2.04607	2.06336	2.04981	2.02983	2.04381	2.03656	2.05223	2.02875	2.03848	2.05977	2.07026	2.04216	2.05773	2.05611	2.04843	2.05727	2.03251	2.06426	2.05895	2.0372	2.03906	2.03851
92.5057		2.02676	2.07317	2.04957	2.0289	2.05014	2.03474	2.02698	2.03333	2.05228	2.0438	2.04148	2.02896	2.04107	2.0504	2.06174	2.07477	2.03892	2.04816	2.03413	2.03577	2.06552	2.04139	2.03088	2.03132	2.02344	2.04954	2.04576	2.06274	2.04961	2.02932	2.04309	2.03604	2.05141	2.02861	2.03789	2.0592	2.06999	2.04133	2.05722	2.05565	2.0476	2.0569	2.03201	2.064	2.05862	2.0368	2.03891	2.03775
92.9079		2.02589	2.07259	2.04941	2.02801	2.04931	2.034	2.02621	2.03289	2.05162	2.04306	2.04139	2.02857	2.04043	2.0497	2.06116	2.07399	2.03857	2.04769	2.03386	2.03524	2.06476	2.04043	2.02961	2.03023	2.02265	2.04888	2.04535	2.06196	2.04937	2.02867	2.04232	2.03555	2.05055	2.02841	2.03738	2.05854	2.06967	2.04044	2.0567	2.05517	2.04679	2.05653	2.03142	2.06354	2.05815	2.03637	2.03871	2.03689
93.3101		2.02483	2.07174	2.04929	2.02707	2.04846	2.03317	2.02541	2.03244	2.051	2.04232	2.04112	2.0281	2.03961	2.049	2.06056	2.07313	2.03825	2.04714	2.03361	2.03462	2.06397	2.03953	2.02837	2.02913	2.02196	2.04827	2.04484	2.06106	2.04908	2.02786	2.04152	2.03508	2.04963	2.02814	2.03699	2.05778	2.0692	2.03951	2.05618	2.05461	2.04606	2.0561	2.03073	2.0628	2.05758	2.03589	2.03843	2.03592
93.7123		2.02367	2.07062	2.04911	2.02606	2.04757	2.0323	2.02456	2.03206	2.05042	2.04163	2.04072	2.02754	2.0387	2.04834	2.05995	2.07221	2.03794	2.04654	2.03338	2.03394	2.06322	2.03873	2.02729	2.02804	2.02138	2.0477	2.04425	2.0601	2.04871	2.02692	2.04071	2.03461	2.04867	2.0278	2.03673	2.05697	2.06849	2.03859	2.0557	2.05392	2.04544	2.05558	2.02997	2.06175	2.05692	2.03536	2.03811	2.03484
94.1145		2.02249	2.06927	2.04875	2.02498	2.04662	2.0314	2.02368	2.03184	2.04986	2.04105	2.04025	2.02694	2.03778	2.04774	2.05932	2.07126	2.03762	2.04591	2.03318	2.03321	2.06257	2.03806	2.02647	2.02701	2.0209	2.04714	2.04364	2.05911	2.0483	2.0259	2.03989	2.03413	2.04769	2.02742	2.03661	2.05614	2.06748	2.03771	2.05529	2.0531	2.04494	2.05493	2.02917	2.06042	2.05619	2.0348	2.03777	2.03369
94.5167		2.02137	2.06775	2.04816	2.0238	2.04561	2.03051	2.02275	2.03183	2.0493	2.04058	2.03978	2.02634	2.03696	2.04723	2.05865	2.0703	2.03729	2.04534	2.03301	2.03248	2.06209	2.03753	2.02595	2.02607	2.02048	2.04655	2.04305	2.05813	2.04786	2.02487	2.03906	2.03362	2.04671	2.02704	2.03661	2.05535	2.06616	2.03689	2.05498	2.05219	2.04453	2.05415	2.02837	2.05888	2.05537	2.03419	2.03745	2.0325
94.9189		2.02035	2.06612	2.04729	2.02255	2.04451	2.02966	2.0218	2.03202	2.04872	2.0402	2.03939	2.02578	2.03629	2.0468	2.05794	2.06935	2.03692	2.04488	2.03283	2.03181	2.06178	2.03713	2.02574	2.02522	2.02007	2.04591	2.04253	2.0572	2.04742	2.02387	2.03822	2.03309	2.04575	2.02672	2.03669	2.05466	2.06459	2.03612	2.05474	2.05123	2.04418	2.05322	2.02763	2.05724	2.05445	2.03351	2.03715	2.03132
95.3211		2.01941	2.06448	2.04616	2.02123	2.04333	2.02887	2.02082	2.03236	2.04811	2.03984	2.0391	2.02532	2.03577	2.04644	2.05719	2.06839	2.0365	2.0446	2.0326	2.03129	2.06161	2.03681	2.02575	2.02446	2.01964	2.0452	2.04208	2.05634	2.047	2.02293	2.03734	2.03251	2.04479	2.02651	2.0368	2.05411	2.06285	2.03535	2.05453	2.05032	2.04384	2.05216	2.02698	2.05564	2.05338	2.03276	2.03687	2.03023
95.7233		2.01855	2.06289	2.04481	2.01988	2.04207	2.02817	2.01981	2.03274	2.04744	2.03941	2.03893	2.02496	2.03537	2.04607	2.05641	2.06741	2.03598	2.0445	2.03229	2.03099	2.06148	2.03656	2.02587	2.02376	2.01919	2.04442	2.04168	2.05555	2.0466	2.02203	2.03641	2.03188	2.04384	2.02642	2.03688	2.0537	2.0611	2.03454	2.05427	2.04949	2.04347	2.05101	2.02642	2.0542	2.05215	2.03189	2.03657	2.02929
96.1255		2.01774	2.06143	2.04334	2.01853	2.04078	2.02754	2.01879	2.03301	2.04671	2.03884	2.03883	2.02469	2.03499	2.04562	2.05561	2.0664	2.03536	2.04456	2.03182	2.03097	2.06125	2.03633	2.02596	2.02308	2.01871	2.04361	2.04127	2.05483	2.04621	2.02115	2.03543	2.03119	2.04289	2.02645	2.0369	2.05341	2.05946	2.03364	2.05387	2.04877	2.04305	2.04976	2.02593	2.053	2.05077	2.03091	2.03617	2.02856
96.5277		2.01696	2.06016	2.04186	2.01722	2.03948	2.02697	2.01775	2.03305	2.04589	2.03805	2.03872	2.02449	2.03453	2.045	2.05481	2.06532	2.0346	2.0447	2.03114	2.03125	2.06079	2.03611	2.02593	2.02237	2.01824	2.04277	2.0408	2.05415	2.0458	2.02023	2.03438	2.03043	2.04192	2.02655	2.03679	2.05318	2.05806	2.03262	2.05325	2.04811	2.0426	2.04844	2.02543	2.05207	2.04927	2.02982	2.0356	2.02804
96.9299		2.0162	2.0591	2.04046	2.01595	2.03825	2.02638	2.0167	2.03278	2.04497	2.03704	2.0385	2.02426	2.03388	2.04416	2.05402	2.06416	2.03366	2.04485	2.03021	2.03182	2.06002	2.03592	2.02572	2.02157	2.01778	2.04195	2.04022	2.05348	2.04536	2.01924	2.03326	2.02957	2.04092	2.02664	2.03649	2.05294	2.05698	2.03148	2.05237	2.04746	2.04216	2.04704	2.02483	2.05139	2.04772	2.02869	2.03477	2.02772
97.3321		2.01548	2.05827	2.03923	2.01472	2.03712	2.02567	2.01562	2.03214	2.04394	2.03581	2.03809	2.02394	2.03298	2.04307	2.05323	2.0629	2.03254	2.04489	2.02903	2.03263	2.0589	2.03575	2.02534	2.02066	2.01736	2.04114	2.03951	2.05275	2.04486	2.01814	2.03209	2.02859	2.03988	2.02665	2.03598	2.05264	2.05622	2.03025	2.05122	2.04673	2.04178	2.04553	2.02401	2.05088	2.04621	2.02756	2.03365	2.02753
97.7343		2.01482	2.05762	2.03821	2.0135	2.03616	2.02475	2.01449	2.03117	2.04278	2.03444	2.03743	2.02346	2.03181	2.04176	2.05246	2.06157	2.03121	2.04478	2.02762	2.03359	2.05749	2.03562	2.02486	2.01959	2.01693	2.04035	2.03868	2.05191	2.04432	2.01695	2.03088	2.02746	2.0388	2.02651	2.03524	2.05222	2.05574	2.02903	2.04985	2.04584	2.04153	2.04389	2.02289	2.05045	2.04481	2.02654	2.03226	2.02736
98.1365		2.01423	2.05712	2.03742	2.01224	2.03541	2.02349	2.01331	2.02991	2.0415	2.03301	2.03653	2.0228	2.03037	2.0403	2.0517	2.0602	2.0297	2.04446	2.02603	2.03458	2.05595	2.03552	2.02437	2.01838	2.01648	2.03956	2.03777	2.05088	2.04376	2.0157	2.02964	2.02622	2.03769	2.02619	2.03432	2.0517	2.05545	2.0279	2.04839	2.04479	2.04144	2.04212	2.02141	2.05004	2.04357	2.02571	2.03069	2.02714
98.5387		2.0137	2.05672	2.03687	2.01093	2.03486	2.02185	2.01207	2.02845	2.04013	2.03162	2.03547	2.022	2.02873	2.0388	2.05099	2.05885	2.02806	2.04393	2.02434	2.0355	2.05447	2.03544	2.02396	2.01703	2.01595	2.03875	2.0368	2.04966	2.04322	2.01448	2.02841	2.02489	2.03658	2.0257	2.03332	2.05111	2.05521	2.02696	2.04695	2.04361	2.0415	2.04023	2.01959	2.04958	2.04247	2.02513	2.0291	2.02679
98.9409		2.0132	2.05636	2.03654	2.00954	2.03452	2.01983	2.01078	2.0269	2.03872	2.03033	2.03437	2.02116	2.02698	2.03738	2.05036	2.05759	2.02635	2.04319	2.02265	2.03629	2.05325	2.03533	2.02367	2.01557	2.01533	2.03792	2.03582	2.04827	2.04273	2.01339	2.02722	2.02357	2.03554	2.0251	2.0324	2.05052	2.05492	2.02629	2.04569	2.04238	2.04167	2.03827	2.01754	2.04907	2.04147	2.02485	2.02767	2.02632
99.3431		2.01267	2.05604	2.03645	2.00807	2.03432	2.01753	2.00948	2.02538	2.03734	2.02919	2.0334	2.0204	2.02525	2.03615	2.04987	2.0565	2.02469	2.04225	2.02106	2.03689	2.05246	2.03516	2.02346	2.01405	2.01459	2.03707	2.03482	2.04679	2.04234	2.0125	2.0261	2.02238	2.03464	2.02446	2.03172	2.05003	2.05447	2.02594	2.04475	2.04122	2.04187	2.03631	2.01542	2.04854	2.04047	2.02484	2.02662	2.02579
99.7453		2.01203	2.05575	2.0366	2.00656	2.03423	2.01511	2.00822	2.02398	2.03608	2.0282	2.03272	2.01985	2.02371	2.03519	2.04959	2.05565	2.02318	2.04114	2.01966	2.03732	2.05216	2.03491	2.02324	2.01253	2.01376	2.03624	2.03383	2.04537	2.04202	2.01186	2.02503	2.02143	2.03399	2.02386	2.03142	2.04966	2.05381	2.02589	2.04418	2.04021	2.04199	2.03444	2.01345	2.04803	2.03938	2.02505	2.0261	2.02529
100.147		2.01116	2.05553	2.03701	2.00506	2.03416	2.01278	2.00706	2.02283	2.035	2.02735	2.03244	2.01961	2.02254	2.03452	2.04956	2.05508	2.02193	2.03989	2.01847	2.03763	2.05231	2.03457	2.02291	2.01108	2.01287	2.03546	2.03283	2.04414	2.04175	2.01142	2.02396	2.02084	2.03365	2.02335	2.03154	2.04942	2.05291	2.02611	2.044	2.03941	2.04198	2.03272	2.01184	2.04759	2.03814	2.02539	2.02619	2.02495
100.55		2.01	2.05542	2.0377	2.00365	2.03409	2.01077	2.00607	2.02197	2.03414	2.02663	2.03265	2.01969	2.0219	2.03416	2.04982	2.05478	2.02101	2.03852	2.01752	2.03789	2.05274	2.03418	2.02237	2.00977	2.01199	2.03477	2.03185	2.04325	2.04146	2.01108	2.02284	2.02063	2.03368	2.02294	2.03202	2.04927	2.05179	2.02652	2.04415	2.03883	2.04179	2.03125	2.01077	2.04725	2.03673	2.02574	2.02688	2.02485
100.952		2.00852	2.05544	2.03864	2.00243	2.03398	2.00923	2.00529	2.02147	2.0335	2.02601	2.03335	2.02004	2.02193	2.03405	2.05033	2.05473	2.02045	2.0371	2.01678	2.03814	2.05322	2.03381	2.0216	2.00864	2.01119	2.03418	2.03095	2.04278	2.04108	2.01068	2.02154	2.02077	2.03406	2.02259	2.03268	2.04912	2.05048	2.02704	2.04452	2.03843	2.04142	2.03005	2.01033	2.047	2.03521	2.02599	2.02804	2.02506
101.354		2.00678	2.05565	2.03978	2.00149	2.03386	2.00828	2.00473	2.02131	2.03307	2.02549	2.03446	2.02054	2.02266	2.03415	2.05108	2.05486	2.02023	2.03572	2.01623	2.03839	2.05351	2.03355	2.02064	2.00775	2.01053	2.03371	2.03021	2.04272	2.04057	2.01005	2.01998	2.02118	2.03471	2.02226	2.03326	2.04888	2.0491	2.02761	2.045	2.03812	2.04095	2.02921	2.01052	2.04685	2.03373	2.02604	2.02947	2.02555
101.756		2.0049	2.05608	2.04103	2.0009	2.03376	2.00792	2.00439	2.02143	2.03278	2.02508	2.03587	2.02103	2.02401	2.03441	2.05202	2.05507	2.02031	2.03446	2.01586	2.03859	2.05343	2.03346	2.01962	2.00708	2.01007	2.03333	2.02978	2.04302	2.03991	2.00906	2.01813	2.0217	2.0355	2.02191	2.03346	2.04851	2.04775	2.02821	2.04547	2.03781	2.04044	2.02876	2.01119	2.04681	2.03247	2.02583	2.03098	2.02625
102.158		2.00307	2.05674	2.04229	2.00071	2.0337	2.00811	2.00426	2.02173	2.0326	2.02478	2.0374	2.02137	2.02576	2.03481	2.05313	2.05527	2.0206	2.03343	2.01569	2.03864	2.05292	2.03355	2.01868	2.00664	2.00982	2.03305	2.02975	2.04357	2.03914	2.00769	2.01599	2.02219	2.03629	2.02154	2.03307	2.048	2.04659	2.02881	2.04585	2.03739	2.03998	2.02876	2.01216	2.04693	2.03163	2.02536	2.03238	2.02702
102.561		2.00148	2.05763	2.04346	2.00091	2.0337	2.00878	2.00434	2.02211	2.03245	2.02455	2.03887	2.02148	2.02764	2.03536	2.05439	2.05539	2.02104	2.03268	2.01581	2.03841	2.05203	2.0338	2.01791	2.00637	2.00979	2.03289	2.03021	2.04422	2.03832	2.00602	2.0137	2.02256	2.03693	2.02122	2.03202	2.04745	2.04576	2.02942	2.04609	2.03677	2.0396	2.02924	2.01317	2.04729	2.03138	2.02463	2.03357	2.02772
102.963		2.0003	2.05873	2.04445	2.00143	2.03375	2.00982	2.00467	2.02247	2.03229	2.02432	2.04009	2.02136	2.02933	2.03613	2.05579	2.05538	2.02155	2.03224	2.0163	2.03777	2.0509	2.0341	2.01734	2.00624	2.00992	2.03286	2.0311	2.04486	2.03751	2.00421	2.0114	2.02276	2.03735	2.02105	2.03039	2.04697	2.04532	2.03002	2.04612	2.03588	2.03933	2.03015	2.01402	2.048	2.03179	2.02368	2.03455	2.02821
103.365		1.99954	2.05994	2.04522	2.00213	2.03378	2.01115	2.0053	2.02274	2.03205	2.02395	2.0409	2.02103	2.03061	2.03716	2.05732	2.05522	2.02208	2.03208	2.01723	2.03665	2.04969	2.0343	2.01682	2.00621	2.01012	2.03299	2.03225	2.04542	2.03676	2.00246	2.0093	2.02282	2.03752	2.02113	2.02841	2.04668	2.04524	2.03058	2.04585	2.0347	2.03917	2.03134	2.01453	2.04913	2.03279	2.02257	2.03532	2.0284
103.767		1.99915	2.06112	2.04575	2.00284	2.03366	2.01268	2.00626	2.02289	2.03167	2.0233	2.04116	2.02056	2.03138	2.03849	2.05888	2.05491	2.02257	2.03218	2.01864	2.03503	2.04853	2.03424	2.01616	2.00623	2.01029	2.03328	2.03338	2.04584	2.03607	2.00092	2.00756	2.02276	2.03743	2.0215	2.02639	2.04667	2.04535	2.03101	2.04518	2.03322	2.03905	2.03253	2.01465	2.05068	2.03418	2.02135	2.03593	2.02825
104.169		1.99895	2.06209	2.04602	2.00338	2.03324	2.01425	2.00758	2.02291	2.03109	2.02224	2.04081	2.02	2.03169	2.04004	2.06034	2.05451	2.023	2.03245	2.02041	2.03295	2.04744	2.0338	2.01506	2.00623	2.01029	2.03366	2.03413	2.04611	2.03541	1.99969	2.00627	2.02264	2.03713	2.02209	2.02463	2.04693	2.04531	2.0312	2.04396	2.03145	2.03895	2.03336	2.0144	2.05251	2.03566	2.02005	2.03635	2.02778
104.572		1.99872	2.06264	2.04603	2.00361	2.03238	2.01569	2.00918	2.02278	2.03029	2.02072	2.03983	2.01936	2.03169	2.04161	2.06152	2.05406	2.02333	2.0328	2.02231	2.03051	2.04634	2.03285	2.01329	2.00613	2.00997	2.03404	2.03417	2.04619	2.0347	1.99875	2.00544	2.02244	2.03666	2.0227	2.0234	2.04737	2.0447	2.03098	2.04206	2.02944	2.03879	2.03345	2.01386	2.05434	2.03686	2.01873	2.03647	2.02705
104.974		1.99828	2.06257	2.04576	2.00347	2.03095	2.0168	2.01092	2.02244	2.02928	2.01879	2.03826	2.01861	2.03161	2.04292	2.06223	2.05361	2.02349	2.03308	2.02401	2.02784	2.04506	2.03134	2.01076	2.0058	2.00928	2.0343	2.03331	2.04604	2.03389	1.99803	2.00499	2.02208	2.03606	2.02306	2.02277	2.04781	2.04316	2.03018	2.0394	2.02723	2.03856	2.03254	2.01318	2.05577	2.03747	2.01746	2.03614	2.02614
105.376		1.99754	2.06176	2.04521	2.00301	2.02891	2.01734	2.01259	2.0218	2.02813	2.0166	2.03623	2.01771	2.03166	2.04361	2.06236	2.05319	2.02347	2.03314	2.02514	2.02513	2.04339	2.02927	2.00756	2.0051	2.00819	2.03433	2.03155	2.04558	2.03291	1.99741	2.0048	2.02145	2.03533	2.02287	2.0227	2.04803	2.04044	2.02866	2.03597	2.02492	2.03827	2.03055	2.01245	2.05642	2.0373	2.01632	2.03518	2.02514
105.778		1.99654	2.06019	2.04442	2.00238	2.02634	2.0172	2.01396	2.02076	2.02699	2.0144	2.03389	2.01665	2.03199	2.04339	2.06188	2.05282	2.02323	2.03284	2.0254	2.02254	2.04118	2.0267	2.00398	2.00392	2.00682	2.0341	2.02906	2.04473	2.03177	1.99688	2.00477	2.02043	2.03448	2.02198	2.02297	2.04786	2.03656	2.02633	2.03192	2.02263	2.03798	2.02761	2.01177	2.05599	2.03632	2.01544	2.03348	2.02407
106.18		1.99546	2.05794	2.04345	2.00182	2.02345	2.01636	2.01482	2.01926	2.02602	2.01244	2.03147	2.01543	2.0327	2.0421	2.0609	2.0525	2.02282	2.03203	2.0246	2.02026	2.03844	2.02372	2.00044	2.00219	2.00534	2.03368	2.02623	2.0434	2.03047	1.99649	2.0049	2.01897	2.0335	2.02039	2.02324	2.04722	2.03178	2.02325	2.02749	2.02053	2.03784	2.02408	2.01115	2.05436	2.03464	2.01495	2.03103	2.02297
106.583		1.99447	2.05519	2.04242	2.00155	2.02061	2.01497	2.01509	2.01731	2.02541	2.01098	2.02923	2.01414	2.03381	2.03982	2.05959	2.05223	2.02231	2.03069	2.02271	2.01852	2.03533	2.02044	1.99746	1.99995	2.00402	2.03319	2.02351	2.04156	2.02907	1.99643	2.00518	2.0171	2.0324	2.01832	2.02313	2.04611	2.02656	2.01958	2.02305	2.01889	2.03801	2.02047	2.01052	2.05156	2.03251	2.01494	2.028	2.02183
106.985		1.99373	2.05222	2.04147	2.00174	2.01828	2.01325	2.01482	2.01507	2.02533	2.01009	2.02749	2.01286	2.03526	2.03681	2.05822	2.05205	2.0218	2.02885	2.01984	2.01749	2.03224	2.01699	1.99553	1.99735	2.00311	2.03275	2.02135	2.03923	2.02757	1.99688	2.00569	2.01497	2.03115	2.01615	2.02232	2.04467	2.02145	2.01566	2.019	2.01799	2.03857	2.01736	2.00978	2.04785	2.0302	2.01549	2.02464	2.02065
107.387		1.9933	2.04932	2.04069	2.00244	2.01698	2.0115	2.01418	2.01277	2.02589	2.00972	2.02653	2.01164	2.03696	2.03348	2.05702	2.05199	2.02141	2.02669	2.01623	2.01732	2.0297	2.0135	1.99496	1.99461	2.00276	2.03239	2.02006	2.03652	2.02597	1.998	2.00636	2.01281	2.02973	2.01431	2.0205	2.04304	2.017	2.01189	2.01573	2.01811	2.03956	2.01534	2.00875	2.04355	2.02798	2.0165	2.02131	2.01947
107.789		1.99309	2.04674	2.04007	2.0035	2.0172	2.00996	2.01338	2.01066	2.02704	2.00956	2.0266	2.01047	2.03871	2.03027	2.05615	2.05212	2.02122	2.02437	2.01212	2.01804	2.02825	2.01001	1.99584	1.99198	2.003	2.03198	2.0197	2.03353	2.02419	1.99973	2.00706	2.01091	2.02809	2.01311	2.01755	2.04133	2.01358	2.0087	2.01354	2.01942	2.04075	2.01488	2.00722	2.03904	2.02601	2.01784	2.0183	2.01834
108.191		1.99283	2.04468	2.03947	2.00463	2.01924	2.00872	2.01263	2.0089	2.02858	2.00921	2.02774	2.00922	2.04025	2.02754	2.0557	2.05246	2.02121	2.02212	2.00777	2.01955	2.02833	2.00655	1.99784	1.98967	2.00363	2.03123	2.02001	2.0304	2.02214	2.00183	2.00744	2.00947	2.02618	2.01267	2.01342	2.03953	2.0113	2.00645	2.01246	2.02191	2.04177	2.01619	2.00502	2.03465	2.02434	2.01923	2.0158	2.01734
108.594		1.99226	2.04319	2.0386	2.00548	2.02309	2.00768	2.01204	2.00751	2.0301	2.00818	2.02977	2.00773	2.04129	2.02542	2.05558	2.05301	2.02124	2.02007	2.00344	2.02156	2.03006	2.00309	2.00036	1.98775	2.0043	2.02977	2.02044	2.02723	2.0197	2.00383	2.00707	2.00857	2.02392	2.01283	2.00823	2.03747	2.01002	2.00525	2.01231	2.02534	2.04217	2.0192	2.002	2.03061	2.02293	2.02044	2.0138	2.01649
108.996		1.99112	2.04223	2.03706	2.00574	2.02827	2.0066	2.01156	2.00625	2.03107	2.00622	2.03224	2.0058	2.04159	2.02377	2.05565	2.05365	2.02112	2.01825	1.99937	2.02365	2.03314	1.99958	2.00255	1.98621	2.00466	2.02729	2.02029	2.02405	2.0168	2.00524	2.00555	2.00813	2.02129	2.01318	2.00217	2.0349	2.00939	2.00495	2.01268	2.02932	2.04161	2.02351	1.9981	2.02702	2.02169	2.02131	2.01211	2.01576
109.398		1.98932	2.04164	2.03448	2.00534	2.03399	2.00515	2.01098	2.00475	2.03099	2.00331	2.03452	2.00334	2.04104	2.02219	2.0557	2.05421	2.02053	2.01664	1.99582	2.02534	2.03688	1.99599	2.00364	1.98489	2.00444	2.0237	2.01895	2.02088	2.01344	2.00574	2.00269	2.00791	2.01831	2.0132	1.9956	2.03154	2.00906	2.00512	2.01305	2.03346	2.04001	2.02853	1.99338	2.02386	2.0205	2.02184	2.01042	2.01505
109.8		1.98693	2.04121	2.03062	2.00448	2.03927	2.00307	2.01003	2.00262	2.02948	1.99978	2.03596	2.00041	2.03978	2.02016	2.05554	2.05451	2.01927	2.01516	1.99308	2.02623	2.04038	1.99235	2.00311	1.98361	2.00359	2.01918	2.01604	2.01772	2.00972	2.00532	1.99854	2.00761	2.01509	2.0124	1.98893	2.02723	2.00881	2.00517	2.01308	2.0375	2.0376	2.03369	1.98807	2.02105	2.0193	2.0222	2.0084	2.01418
110.202		1.98419	2.04077	2.02546	2.00359	2.04329	2.00031	2.0085	1.99959	2.02646	1.9963	2.03609	1.99719	2.03813	2.01723	2.05504	2.05441	2.01715	2.01369	1.99148	2.02605	2.0429	1.98872	2.0008	1.98221	2.00227	2.01422	2.01156	2.01462	2.00588	2.00426	1.99346	2.00703	2.01183	2.01049	1.98272	2.02205	2.00865	2.0046	2.01262	2.04139	2.0349	2.03857	1.98253	2.01849	2.01806	2.02261	2.00583	2.01296
110.605		1.9815	2.04018	2.01922	2.00332	2.04559	1.99705	2.00632	1.99565	2.02218	1.99379	2.03472	1.99396	2.03656	2.01321	2.05416	2.05388	2.01414	2.01218	1.99127	2.02469	2.04411	1.98523	1.99702	1.98057	2.00077	2.00942	2.0058	2.01168	2.00223	2.00308	1.98805	2.00617	2.0088	2.00741	1.9776	2.01634	2.00884	2.0031	2.0119	2.04518	2.03254	2.043	1.97727	2.01614	2.01678	2.02324	2.00264	2.0113
111.007		1.97928	2.03939	2.01233	2.0043	2.04612	1.99366	2.00369	1.99105	2.01717	1.99317	2.03197	1.99098	2.03553	2.00823	2.05293	2.05301	2.01023	2.0105	1.99254	2.02216	2.04424	1.98202	1.99232	1.97864	1.99939	2.00539	1.9993	2.00909	1.99918	2.00233	1.98304	2.00525	2.00631	2.00329	1.97414	2.0107	2.0098	2.00067	2.01128	2.0489	2.0311	2.047	1.9729	2.01396	2.01547	2.02408	1.99889	2.00916
111.409		1.97788	2.03833	2.0054	2.00695	2.04518	1.99065	2.00106	1.98619	2.01222	1.99504	2.02817	1.98838	2.03527	2.00277	2.05136	2.05203	2.00548	2.00846	1.99497	2.01854	2.04398	1.97913	1.98745	1.97645	1.99821	2.00249	1.99266	2.00704	1.99715	2.00231	1.97917	2.00468	2.00453	1.99838	1.9727	2.00587	2.01196	1.99753	2.01112	2.05232	2.0307	2.0506	1.97002	2.01191	2.01402	2.02492	1.99474	2.00665
111.811		1.9773	2.03691	1.99907	2.0113	2.04333	1.98848	1.999	1.98149	2.00819	1.99939	2.0237	1.98604	2.03562	1.99759	2.04942	2.0512	1.99993	2.00574	1.99787	2.01397	2.04429	1.97659	1.98323	1.97404	1.99708	2.00069	1.98642	2.00573	1.99649	2.00296	1.97707	2.00484	2.00345	1.99299	1.97326	2.00258	2.01564	1.99401	2.01153	2.05493	2.03098	2.05378	1.96908	2.00987	2.01236	2.02531	1.99033	2.00392
112.213		1.97729	2.03495	1.99393	2.01676	2.04122	1.98738	1.99801	1.97712	2.00584	2.00539	2.01876	1.98361	2.03595	1.99353	2.04696	2.05073	1.99365	2.00202	2.00027	2.00861	2.04607	1.97445	1.98033	1.9715	1.9956	1.9995	1.98092	2.00524	1.99731	2.00378	1.977	2.00588	2.0027	1.98736	1.9753	2.00133	2.02088	1.99044	2.01224	2.056	2.03109	2.05631	1.97022	2.00758	2.01051	2.02481	1.9857	2.00113
112.616		1.97724	2.03216	1.99028	2.02223	2.03952	1.98725	1.99826	1.97297	2.00559	2.01156	2.0133	1.98058	2.03533	1.99134	2.0437	2.05068	1.98677	1.99698	2.00125	2.00267	2.04981	1.97273	1.97928	1.96898	1.99334	1.99806	1.97619	2.00549	1.99941	2.00399	1.97891	2.00747	2.00167	1.98163	1.97801	2.00211	2.02737	1.98696	2.0126	2.05485	2.02995	2.05778	1.9731	2.00467	2.00859	2.02313	1.98083	1.99834
113.018		1.97643	2.02824	1.98809	2.02646	2.03878	1.98762	1.99941	1.96866	2.00732	2.01632	2.00698	1.97646	2.03287	1.99146	2.03924	2.05091	1.97954	1.99059	2.00027	1.99643	2.05522	1.97163	1.98028	1.96674	1.98996	1.99546	1.97192	2.00626	2.0022	2.00277	1.98242	2.00883	1.9996	1.97585	1.98064	2.00425	2.03446	1.98352	2.01201	2.05114	2.02679	2.05772	1.97693	2.00078	2.00698	2.02026	1.9756	1.99555
113.42		1.97443	2.02299	1.98685	2.02848	2.03935	1.98793	2.00057	1.96375	2.01028	2.01855	1.99931	1.97092	2.02808	1.99376	2.03318	2.05109	1.97247	1.98328	1.99744	1.99024	2.06114	1.97145	1.98321	1.96517	1.98552	1.991	1.96757	2.00722	2.00487	1.99965	1.98695	2.00888	1.9959	1.96994	1.98285	2.00644	2.04132	1.9799	2.01016	2.04499	2.0215	2.05574	1.98067	1.99571	2.00627	2.01645	1.96994	1.99265
113.822		1.97118	2.01643	1.98579	2.02792	2.04129	1.98768	2.00064	1.95799	2.01335	2.01798	1.98993	1.96388	2.02107	1.99744	2.0252	2.05079	1.96618	1.97591	1.99328	1.98446	2.06582	1.97256	1.98758	1.96476	1.98035	1.9844	1.96258	2.00799	2.0066	1.9946	1.99199	2.00667	1.99034	1.96379	1.98458	2.00715	2.04716	1.97583	2.00725	2.03691	2.01467	2.05173	1.98336	1.98955	2.00725	2.01215	1.96388	1.98957
114.224		1.96729	2.00887	1.98407	2.02498	2.04439	1.98679	1.99865	1.95151	2.01539	2.01511	1.97876	1.95552	2.01247	2.00125	2.01522	2.0496	1.96156	1.96993	1.98877	1.97946	2.06758	1.975	1.99272	1.9661	1.97521	1.97581	1.9566	2.00831	2.00686	1.98806	1.99722	2.00177	1.98309	1.95734	1.9861	2.00509	2.05138	1.97117	2.004	2.02775	2.00739	2.04596	1.98442	1.98275	2.01052	2.00779	1.95763	1.98632
114.627		1.96393	2.00091	1.98109	2.02025	2.04816	1.98563	1.99419	1.94494	2.01566	2.01116	1.9662	1.94624	2.00325	2.00391	2.00343	2.04729	1.95967	1.96706	1.9851	1.97553	2.06537	1.97851	1.99777	1.96973	1.97104	1.96571	1.94962	2.00807	2.00555	1.98086	2.00266	1.99441	1.97467	1.95059	1.9876	1.99961	2.05369	1.966	2.00154	2.0185	2.00109	2.03906	1.98373	1.97605	2.0164	2.00371	1.95158	1.98306
115.029		1.96261	1.99344	1.97675	2.01444	2.05191	1.98485	1.98747	1.93946	2.01401	2.00773	1.95307	1.93672	1.99453	2.00472	1.99041	2.04389	1.96133	1.96905	1.98337	1.97281	2.05901	1.9823	2.00209	1.97603	1.96894	1.95479	1.94209	2.00737	2.00311	1.97406	2.00844	1.9855	1.96592	1.9437	1.98912	1.99087	2.0541	1.96065	2.00107	2.01024	1.99707	2.032	1.98161	1.97043	2.02473	1.99998	1.94628	1.98012
115.431		1.96488	1.98752	1.9715	2.00831	2.05479	1.98508	1.9793	1.93669	2.01082	2.00632	1.9407	1.9279	1.98732	2.00367	1.97711	2.03973	1.96699	1.97675	1.98442	1.97134	2.04911	1.98538	2.00522	1.98505	1.96997	1.94394	1.93498	2.00654	2.00045	1.96885	2.01478	1.97652	1.95783	1.93695	1.99041	1.97968	2.05282	1.95569	2.00363	2.00404	1.99622	2.02599	1.97864	1.96684	2.03445	1.99631	1.94246	1.97795
115.833		1.97156	1.98425	1.96627	2.00251	2.05601	1.98672	1.97089	1.93858	2.00683	2.00824	1.93074	1.92106	1.98226	2.00142	1.96484	2.03546	1.97616	1.98911	1.98838	1.97099	2.03681	1.98716	2.00713	1.99631	1.97482	1.93423	1.92973	2.00609	1.99892	1.9663	2.02168	1.96933	1.95151	1.93064	1.99131	1.96734	2.05026	1.9518	2.0096	2.00077	1.99867	2.02217	1.97552	1.96597	2.04422	1.99204	1.94086	1.97701
116.235		1.9824	1.98458	1.96231	1.99756	2.05494	1.98975	1.96359	1.94689	2.00292	2.01371	1.92503	1.91774	1.97938	1.99891	1.9552	2.03193	1.98731	2.0033	1.99428	1.9716	2.02351	1.98768	2.00808	2.00879	1.98349	1.92699	1.92811	2.00653	2.0001	1.96705	2.02876	1.96574	1.94806	1.92499	1.9917	1.95551	2.04698	1.94962	2.01852	2.00092	2.00361	2.02124	1.97292	1.96781	2.05239	1.98637	1.94213	1.97763
116.638		1.99574	1.98893	1.96093	1.99382	2.05136	1.99342	1.95853	1.9623	1.99979	2.02165	1.92518	1.91952	1.9779	1.99694	1.94976	2.02992	1.99821	2.01549	2.00032	1.97295	2.01072	1.98777	2.00853	2.02106	1.99468	1.92365	1.93188	2.00822	2.00543	1.9709	2.03522	1.96688	1.94823	1.91997	1.99179	1.94599	2.04363	1.94954	2.02892	2.0043	2.00948	2.02296	1.97142	1.97146	2.05764	1.97853	1.94654	1.97985
117.04		2.00917	1.9968	1.96327	1.99142	2.04553	1.99675	1.95613	1.98363	1.99768	2.02978	1.93184	1.92744	1.97638	1.99587	1.9496	2.02983	2.00686	2.02334	2.00449	1.97486	1.9998	1.98884	2.00887	2.03175	2.00591	1.92538	1.94212	2.0111	2.01549	1.9766	2.04007	1.97223	1.95224	1.91529	1.99195	1.94053	2.04087	1.95146	2.03884	2.00985	2.01439	2.02583	1.97148	1.97538	2.05919	1.96809	1.95367	1.98335
117.442		2.02087	2.00652	1.97005	1.99024	2.03804	1.9987	1.95584	2.00754	1.99613	2.03564	1.94388	1.94127	1.97317	1.99542	1.95452	2.03133	2.01237	2.02643	2.00532	1.97718	1.99171	1.99231	2.00938	2.03993	2.01428	1.93231	1.95839	2.01456	2.02924	1.98217	2.04249	1.97932	1.95961	1.91043	1.99279	1.94044	2.03917	1.95463	2.04649	2.01583	2.01711	2.02741	1.97348	1.978	2.05686	1.95504	1.96252	1.98753
117.844		2.03005	2.01566	1.98129	1.98999	2.02966	1.99874	1.95628	2.02989	1.99416	2.03771	1.9582	1.95897	1.96707	1.99487	1.96269	2.03337	2.01492	2.02577	2.00238	1.97977	1.98683	1.99936	2.0101	2.04537	2.01767	1.94286	1.97835	2.01747	2.04397	1.98573	2.04217	1.98458	1.96939	1.90491	1.99471	1.94621	2.03862	1.95783	2.05067	2.02044	2.01706	2.02532	1.97777	1.97851	2.05116	1.93983	1.9718	1.99172
118.246		2.03679	2.02197	1.99635	1.99029	2.02105	1.99684	1.95599	2.04758	1.99068	2.03581	1.97108	1.97719	1.95762	1.99345	1.97113	2.03451	2.01552	2.02304	1.99594	1.98252	1.9847	2.01007	2.01092	2.04849	2.01517	1.95416	1.99865	2.01862	2.05648	1.98632	2.03927	1.98526	1.98062	1.89851	1.99785	1.95709	2.0388	1.95976	2.05121	2.02249	2.01434	2.0182	1.98472	1.97708	2.04288	1.92341	1.98065	1.99539
118.649		2.04142	2.02419	2.01396	1.99083	2.01246	1.99339	1.95412	2.05953	1.98509	2.03073	1.98007	1.99275	1.94506	1.99083	1.97707	2.03352	2.01539	2.0196	1.98694	1.98531	1.98413	2.02347	2.01173	2.05011	2.00707	1.96365	2.0168	2.01714	2.06471	1.98419	2.03451	1.98051	1.99268	1.89141	2.00227	1.97129	2.03891	1.95955	2.04887	2.02168	2.00936	2.00602	1.99456	1.9748	2.0331	1.90717	1.989	1.99823
119.051		2.04412	2.02237	2.03247	1.99148	2.00368	1.98901	1.95074	2.066	1.97761	2.02375	1.98498	2.00407	1.93013	1.98727	1.97908	2.0298	2.01556	2.01638	1.97646	1.98808	1.98355	2.03749	2.01207	2.05112	1.99419	1.97071	2.03224	2.01278	2.06854	1.98063	2.02879	1.97113	2.00533	1.88414	2.00775	1.98672	2.03796	1.95699	2.04492	2.01847	2.00277	1.98976	2.00707	1.97338	2.02288	1.893	1.99753	2.00016
119.453		2.04469	2.01762	2.05012	1.99228	1.99404	1.98428	1.94661	2.06792	1.96923	2.01626	1.98734	2.01146	1.91375	1.98353	1.97722	2.02341	2.01651	2.01346	1.96587	1.99075	1.98159	2.04975	2.01173	2.05213	1.97775	1.97701	2.04588	2.00599	2.06932	1.97771	2.02298	1.95884	2.01844	1.87749	2.01394	2.00178	2.03518	1.95254	2.04118	2.01365	1.9952	1.97095	2.02109	1.97477	2.01323	1.88339	2.00732	2.00125
119.855		2.04271	2.01182	2.06523	1.99339	1.98276	1.9797	1.94281	2.06656	1.96155	2.00939	1.9894	2.01655	1.89678	1.98055	1.97262	2.01492	2.01795	2.01036	1.95658	1.99316	1.97758	2.05867	2.01027	2.05317	1.95887	1.98583	2.05887	1.99775	2.06898	1.9779	2.01762	1.9456	2.03162	1.87234	2.02041	2.01556	2.03018	1.94717	2.03932	2.00791	1.9875	1.95132	2.03434	1.98071	2.00477	1.88143	2.01922	2.0016
[truncated: 12 more columns]

## Sheet: Transmission
	Sample No.	1	2	3	4	5	6	7	8	9	10	11	12	13	14	15	16	17	18	19	20	21	22	23	24	25	26	27	28	29	30	31	32	33	34	35	36	37	38	39	40	41	42	43	44	45	46	47	48
	Preparation	LYD	LYD	EUF	EUF	EUF	EUF	ANLG	ANLG	LYD	LYD	EUF	EUF	LYD	ANLG	LYD	HC	HC	LYD	ANLG	ANLG	EUF	HC	HC	ANLG	LYD	ANLG	ANLG	HC	EUF	ANLG	EUF	LYD	HC	LYD	EUF	HC	LYD	ANLG	ANLG	EUF	HC	EUF	HC	HC	LYD	HC	HC	ANLG
Wavelength, cm-1		Transmission Index
1.2066		0.584961	0.590961	0.583313	0.593681	0.588408	0.60066	0.601803	0.601674	0.591898	0.577193	0.596125	0.593631	0.590859	0.582282	0.568098	0.591857	0.597294	0.598617	0.599871	0.586049	0.595016	0.573339	0.590195	0.598754	0.586804	0.596127	0.591187	0.584095	0.59551	0.589258	0.614731	0.57495	0.575121	0.586029	0.594756	0.599689	0.578117	0.585742	0.57942	0.602281	0.567569	0.589075	0.601241	0.595301	0.629292	0.579963	0.590759	0.599788
1.60879		0.59334	0.599242	0.591311	0.602017	0.596377	0.611942	0.610319	0.611363	0.600972	0.586927	0.606948	0.602421	0.60074	0.592527	0.577791	0.600975	0.607418	0.60805	0.607648	0.596283	0.603205	0.585881	0.600286	0.606922	0.595434	0.60592	0.600671	0.593948	0.603967	0.598526	0.62371	0.584279	0.584741	0.599186	0.606087	0.609542	0.588603	0.59428	0.588384	0.610013	0.575933	0.599871	0.609654	0.605076	0.638869	0.587721	0.601473	0.608339
2.01099		0.595725	0.602498	0.593796	0.604697	0.598503	0.617127	0.613695	0.615174	0.604272	0.590212	0.610996	0.6056	0.604809	0.596745	0.581676	0.604667	0.611803	0.611266	0.611218	0.600006	0.605813	0.591806	0.604104	0.609798	0.5985	0.609298	0.604294	0.59787	0.607136	0.602257	0.627065	0.58786	0.588457	0.604399	0.610328	0.61322	0.592364	0.597652	0.592042	0.612497	0.579068	0.603643	0.612498	0.609095	0.642818	0.590744	0.605744	0.61176
2.41319		0.595252	0.603296	0.593559	0.604656	0.597952	0.619318	0.614634	0.616134	0.604952	0.590447	0.611799	0.606096	0.606036	0.598029	0.582673	0.60582	0.613374	0.611512	0.612767	0.600562	0.605878	0.594544	0.604907	0.610092	0.59888	0.609549	0.60503	0.598854	0.607703	0.603294	0.627753	0.588663	0.589272	0.605771	0.61117	0.613856	0.593001	0.598521	0.593092	0.6126	0.579698	0.604198	0.612724	0.610242	0.644036	0.591432	0.606831	0.612674
2.81539		0.59341	0.602881	0.591977	0.603312	0.596173	0.619929	0.614423	0.615657	0.604447	0.589237	0.611062	0.605304	0.605851	0.597882	0.58223	0.605738	0.613471	0.610311	0.613278	0.59959	0.604793	0.595688	0.604224	0.60912	0.597927	0.608291	0.60432	0.59836	0.606978	0.602998	0.627158	0.588117	0.588656	0.605291	0.610342	0.612985	0.592161	0.598163	0.592776	0.611631	0.579127	0.603285	0.611756	0.60992	0.643847	0.590933	0.606329	0.612341
3.21759		0.590956	0.601869	0.589742	0.601365	0.593866	0.619651	0.613697	0.614452	0.603436	0.587395	0.609625	0.603912	0.604958	0.59705	0.581065	0.60505	0.612756	0.608431	0.613219	0.597907	0.603229	0.596016	0.60282	0.607542	0.596325	0.606339	0.602884	0.597115	0.605611	0.602046	0.625967	0.586928	0.587341	0.60395	0.608706	0.611374	0.590641	0.597201	0.591723	0.610223	0.578009	0.601744	0.610293	0.608834	0.642899	0.589822	0.605037	0.611385
3.61979		0.588295	0.600565	0.58721	0.599164	0.59138	0.618846	0.612768	0.612884	0.602239	0.58535	0.607906	0.602257	0.603716	0.595908	0.57954	0.604068	0.611578	0.606273	0.61282	0.595927	0.601509	0.595925	0.601092	0.605692	0.594439	0.604105	0.601084	0.595488	0.603925	0.600777	0.624525	0.585446	0.585691	0.602246	0.606713	0.609419	0.588837	0.595944	0.590281	0.608684	0.576682	0.599984	0.608673	0.60735	0.641522	0.588404	0.603368	0.610117
4.02199		0.585643	0.599118	0.584563	0.596876	0.58888	0.617706	0.611784	0.611145	0.600988	0.583332	0.6061	0.600502	0.602301	0.59464	0.577827	0.602945	0.610126	0.604045	0.612187	0.593856	0.599774	0.595614	0.599243	0.603738	0.592465	0.601795	0.599107	0.593667	0.602076	0.599358	0.623	0.583843	0.583887	0.600421	0.604595	0.607322	0.586943	0.594538	0.588651	0.607152	0.575319	0.59819	0.607048	0.605663	0.639878	0.586841	0.601535	0.608695
4.42418		0.583111	0.597598	0.581892	0.594578	0.586436	0.616334	0.610804	0.609326	0.599716	0.58146	0.604288	0.598714	0.600795	0.593326	0.576003	0.601749	0.608498	0.601847	0.611355	0.591786	0.598069	0.595175	0.597373	0.60176	0.590509	0.599505	0.597039	0.59174	0.600129	0.597869	0.62146	0.582195	0.58201	0.598584	0.602459	0.605181	0.585044	0.593047	0.586953	0.605673	0.574004	0.596431	0.605468	0.603875	0.638032	0.585218	0.599643	0.607192
4.82638		0.580744	0.596029	0.579235	0.592294	0.584064	0.614779	0.609836	0.607457	0.598408	0.579786	0.602486	0.596911	0.599228	0.591989	0.574091	0.600499	0.606734	0.599712	0.610316	0.589749	0.596388	0.594639	0.595511	0.599783	0.588618	0.597266	0.594916	0.589747	0.598105	0.596332	0.619909	0.580523	0.580086	0.596769	0.600341	0.603036	0.58317	0.591486	0.585248	0.604239	0.572772	0.594711	0.603925	0.602034	0.635984	0.583574	0.597736	0.605638
5.22858		0.578542	0.594407	0.5766	0.590023	0.581751	0.613048	0.608853	0.605526	0.597016	0.578315	0.600675	0.595079	0.597595	0.590616	0.572082	0.599178	0.604831	0.597627	0.609028	0.58774	0.594691	0.593992	0.593642	0.597801	0.586796	0.595071	0.592739	0.587692	0.595992	0.594738	0.61831	0.578817	0.578113	0.594966	0.598223	0.600885	0.581316	0.58984	0.583553	0.602808	0.571621	0.593002	0.602382	0.600151	0.633679	0.581914	0.595817	0.604029
5.63078		0.576468	0.592706	0.573967	0.58774	0.579461	0.61111	0.607804	0.603482	0.595478	0.577014	0.598811	0.593179	0.595862	0.589168	0.569942	0.597747	0.602742	0.595542	0.607418	0.585726	0.592918	0.593187	0.591714	0.595778	0.58501	0.592885	0.590484	0.585559	0.593755	0.593052	0.616588	0.577042	0.576062	0.593138	0.596043	0.598701	0.579453	0.588076	0.581841	0.601313	0.570525	0.59125	0.600779	0.598206	0.631023	0.580216	0.593859	0.602339
6.03298		0.574448	0.59088	0.571295	0.5854	0.577136	0.608896	0.606612	0.60124	0.593713	0.57581	0.59683	0.591151	0.593975	0.587579	0.567619	0.59614	0.600381	0.593367	0.605381	0.58365	0.590994	0.592139	0.589635	0.593656	0.583188	0.590649	0.588104	0.583307	0.59134	0.591214	0.614633	0.575139	0.573887	0.59122	0.593704	0.596426	0.577531	0.586134	0.580042	0.599663	0.569431	0.589386	0.599035	0.59615	0.627879	0.578425	0.591809	0.600515
6.43518		0.572364	0.588856	0.568518	0.582937	0.574695	0.606295	0.605171	0.598676	0.591624	0.574579	0.594644	0.588908	0.59185	0.58576	0.565039	0.594267	0.597619	0.59097	0.602779	0.581427	0.588824	0.590726	0.587274	0.59135	0.581214	0.588279	0.585527	0.580878	0.588671	0.58914	0.612294	0.573027	0.571518	0.589126	0.591071	0.593975	0.575477	0.583932	0.578038	0.597743	0.56825	0.587317	0.597049	0.593901	0.62408	0.576455	0.589585	0.598481
6.83738		0.57006	0.586538	0.565543	0.580259	0.572029	0.603153	0.603345	0.595632	0.589089	0.573144	0.59214	0.586335	0.58938	0.583595	0.562105	0.59201	0.594291	0.588182	0.599449	0.578944	0.586293	0.588784	0.584461	0.588749	0.578924	0.585664	0.582656	0.578187	0.585647	0.586719	0.609385	0.570594	0.568866	0.586741	0.587973	0.59123	0.57319	0.581363	0.575669	0.595412	0.566858	0.584928	0.594699	0.591346	0.619441	0.574184	0.587077	0.596126
7.23958		0.567333	0.583803	0.562252	0.577245	0.568998	0.599286	0.600967	0.591926	0.585963	0.571272	0.589175	0.58329	0.586425	0.580937	0.558702	0.589222	0.590209	0.5848	0.595219	0.576056	0.583265	0.586119	0.580995	0.585715	0.576116	0.582668	0.579367	0.575127	0.582143	0.583814	0.605691	0.567703	0.565813	0.583923	0.584221	0.588046	0.570542	0.578289	0.572738	0.592501	0.565083	0.582074	0.591836	0.588342	0.613786	0.571451	0.584148	0.593312
7.64178		0.56396	0.580503	0.558506	0.573752	0.565434	0.594506	0.597847	0.587374	0.58208	0.568692	0.585584	0.579607	0.582829	0.577622	0.554698	0.585733	0.585192	0.580613	0.589938	0.572593	0.579587	0.582523	0.576672	0.582088	0.572564	0.579137	0.575515	0.571571	0.57802	0.580271	0.601001	0.564193	0.56223	0.580507	0.57963	0.58425	0.567377	0.574551	0.569038	0.588822	0.562717	0.578586	0.588294	0.58472	0.606988	0.568072	0.58064	0.589872
8.04397		0.559728	0.576487	0.554161	0.569624	0.561159	0.588662	0.593782	0.581833	0.577269	0.565133	0.58119	0.575115	0.578427	0.573474	0.549962	0.581368	0.579114	0.575438	0.583519	0.568376	0.575099	0.577818	0.571318	0.577704	0.568057	0.574906	0.570948	0.567386	0.573137	0.575926	0.595147	0.559897	0.557977	0.576323	0.574059	0.579664	0.563525	0.569982	0.564391	0.58418	0.559539	0.574281	0.583901	0.580304	0.599015	0.563859	0.576388	0.585632
8.44617		0.554483	0.571616	0.549086	0.564719	0.556004	0.581695	0.588593	0.575242	0.571384	0.560381	0.575835	0.569664	0.573079	0.568342	0.544387	0.575975	0.571943	0.569174	0.575979	0.563241	0.569666	0.571905	0.564846	0.57242	0.562452	0.569828	0.565532	0.56245	0.567377	0.57064	0.588062	0.554668	0.552933	0.571218	0.567454	0.574131	0.558829	0.564438	0.558692	0.57841	0.555351	0.568993	0.578508	0.574933	0.58997	0.558664	0.571247	0.580431
8.84837		0.548174	0.565799	0.543195	0.558938	0.549858	0.573677	0.582163	0.567663	0.564345	0.554339	0.569412	0.563164	0.566699	0.562129	0.537919	0.569462	0.563783	0.561843	0.567471	0.55708	0.563208	0.564812	0.557294	0.566142	0.555722	0.563806	0.559182	0.556689	0.560683	0.564329	0.579824	0.548416	0.547022	0.565099	0.55988	0.567547	0.553183	0.55783	0.551953	0.571418	0.550037	0.562608	0.572027	0.568504	0.580103	0.552426	0.565125	0.57416
9.25057		0.540882	0.55903	0.53648	0.552266	0.542706	0.56482	0.574482	0.55928	0.556177	0.547072	0.56191	0.555624	0.559299	0.554834	0.530586	0.561841	0.554869	0.553605	0.558269	0.549877	0.555737	0.556716	0.54884	0.55887	0.547987	0.556826	0.551897	0.550103	0.553087	0.556999	0.57067	0.541147	0.540246	0.557968	0.551525	0.559907	0.546566	0.550168	0.544316	0.563223	0.54361	0.555111	0.564464	0.561004	0.569773	0.545209	0.55802	0.566801
9.65277		0.532814	0.551405	0.529027	0.544792	0.534658	0.555445	0.565677	0.550376	0.547044	0.538798	0.55344	0.547176	0.551008	0.546582	0.522514	0.553256	0.545524	0.544733	0.548723	0.54174	0.547385	0.547914	0.539774	0.550711	0.539493	0.548982	0.543783	0.542788	0.544731	0.548773	0.560957	0.532984	0.532703	0.549947	0.54267	0.551325	0.539078	0.541584	0.536031	0.553992	0.536221	0.546616	0.55595	0.552539	0.559388	0.537212	0.550041	0.558454
10.055		0.524252	0.543123	0.521019	0.53671	0.525946	0.545912	0.55601	0.541269	0.53723	0.529844	0.544233	0.538068	0.542068	0.537613	0.51392	0.543973	0.536096	0.535556	0.539189	0.532892	0.538394	0.538764	0.530437	0.541884	0.530562	0.540474	0.535046	0.534932	0.535854	0.539886	0.551086	0.52417	0.524586	0.541275	0.533624	0.542035	0.530933	0.532326	0.5274	0.544027	0.52814	0.537365	0.546734	0.543332	0.549318	0.528725	0.541407	0.549338
10.4572		0.515496	0.534461	0.512709	0.528286	0.516886	0.536547	0.545842	0.532251	0.527105	0.520574	0.534607	0.528625	0.532793	0.528251	0.505084	0.534342	0.526887	0.526391	0.529961	0.52364	0.529083	0.529616	0.521151	0.532681	0.521523	0.53158	0.525963	0.526793	0.52676	0.530645	0.541424	0.515022	0.516155	0.532266	0.524674	0.532351	0.522425	0.522725	0.518724	0.533719	0.519684	0.527696	0.537143	0.533691	0.53983	0.520069	0.532411	0.539755
10.8594		0.506812	0.525714	0.504367	0.519806	0.507807	0.527587	0.535562	0.523542	0.517044	0.511323	0.524903	0.519182	0.523512	0.518843	0.496298	0.524728	0.518108	0.517488	0.521237	0.514315	0.51978	0.520747	0.512166	0.523417	0.512653	0.522598	0.516829	0.518642	0.517753	0.521372	0.532236	0.505876	0.507692	0.523252	0.516034	0.52261	0.513868	0.513122	0.51025	0.523474	0.511157	0.517968	0.527524	0.523948	0.531065	0.511528	0.523365	0.530038
11.2616		0.498395	0.517148	0.496231	0.511518	0.498991	0.519164	0.525518	0.515273	0.507368	0.502353	0.51542	0.510026	0.5145	0.509692	0.487813	0.51544	0.50987	0.509009	0.513103	0.505205	0.510765	0.512337	0.503641	0.514365	0.504141	0.513791	0.507903	0.510711	0.509087	0.512344	0.523671	0.49702	0.499443	0.514511	0.507835	0.513107	0.505533	0.503814	0.502147	0.513637	0.502796	0.508502	0.518174	0.514399	0.523036	0.503302	0.514538	0.520485
11.6638		0.490366	0.508954	0.488469	0.503591	0.49063	0.511306	0.515969	0.507492	0.498295	0.493835	0.506377	0.501352	0.505948	0.50101	0.47981	0.506689	0.502188	0.501026	0.505554	0.496518	0.502224	0.504468	0.495639	0.505721	0.496088	0.505347	0.499365	0.503157	0.500923	0.50375	0.51576	0.488648	0.491584	0.506231	0.500121	0.504054	0.497602	0.495005	0.494506	0.504447	0.494753	0.49952	0.509303	0.505265	0.515663	0.495494	0.506118	0.511317
12.066		0.482774	0.501228	0.481161	0.496098	0.482814	0.503967	0.507061	0.500179	0.489931	0.485857	0.497887	0.49325	0.497941	0.492906	0.472377	0.49857	0.49501	0.493538	0.498514	0.48836	0.494239	0.497138	0.488149	0.497584	0.488518	0.49736	0.491307	0.496043	0.493323	0.495677	0.50845	0.480849	0.4842	0.49849	0.492874	0.49556	0.490156	0.486794	0.487345	0.496017	0.4871	0.49114	0.501011	0.496666	0.5088	0.488129	0.498198	0.502662
12.4682		0.475618	0.493981	0.474301	0.489029	0.475545	0.49705	0.498844	0.493267	0.482284	0.478439	0.489974	0.485718	0.490476	0.48539	0.46552	0.491079	0.488239	0.48649	0.491866	0.480749	0.4868	0.490292	0.481112	0.48997	0.4814	0.489839	0.483738	0.489347	0.486254	0.488122	0.501632	0.473614	0.47729	0.491267	0.486031	0.487644	0.483182	0.479184	0.480633	0.488357	0.479849	0.483375	0.493304	0.488634	0.502276	0.481169	0.490781	0.494557
12.8704		0.468857	0.487154	0.467822	0.482311	0.468761	0.490433	0.491288	0.48667	0.475292	0.471547	0.482592	0.478692	0.483486	0.478403	0.459178	0.484137	0.481759	0.479801	0.48548	0.473636	0.479831	0.483837	0.474436	0.482829	0.474666	0.482731	0.47661	0.48298	0.479621	0.481021	0.49517	0.466863	0.470788	0.484472	0.479505	0.480257	0.476603	0.47211	0.474305	0.481395	0.472969	0.476169	0.486119	0.481136	0.495919	0.474546	0.483808	0.486976
13.2726		0.462434	0.48065	0.46162	0.47584	0.462371	0.483996	0.484318	0.480294	0.468853	0.465115	0.475659	0.472071	0.476871	0.471841	0.453249	0.477629	0.475456	0.473375	0.479231	0.466939	0.473228	0.477668	0.468025	0.476078	0.468236	0.475948	0.469841	0.476819	0.473291	0.474275	0.488924	0.460476	0.464588	0.477978	0.473205	0.473308	0.470313	0.465469	0.468277	0.475014	0.466412	0.469424	0.479351	0.474096	0.489578	0.468182	0.477185	0.479852
13.6748		0.45628	0.474359	0.45558	0.469512	0.456277	0.477636	0.477841	0.474056	0.462849	0.459056	0.469081	0.465748	0.470524	0.46559	0.447616	0.471435	0.469233	0.467126	0.473018	0.460564	0.466884	0.471684	0.461787	0.469624	0.462029	0.469396	0.46334	0.470739	0.467128	0.467779	0.48277	0.454327	0.458573	0.471652	0.467043	0.466696	0.464202	0.459149	0.462461	0.469083	0.460124	0.463034	0.47289	0.467428	0.483147	0.462004	0.470811	0.473107
14.077		0.45033	0.468188	0.449607	0.463242	0.450395	0.471279	0.471763	0.467893	0.457171	0.453273	0.462771	0.45963	0.464355	0.459548	0.442166	0.465448	0.463021	0.460983	0.466778	0.454431	0.460713	0.465797	0.455647	0.463387	0.455974	0.462993	0.457031	0.464636	0.461016	0.461446	0.476615	0.448303	0.45264	0.465382	0.460957	0.46033	0.458184	0.453051	0.456779	0.463477	0.45406	0.456905	0.466634	0.461052	0.476572	0.455958	0.464598	0.466668
14.4792		0.44453	0.46207	0.443634	0.45698	0.444662	0.464892	0.466003	0.461768	0.451724	0.447675	0.456664	0.453651	0.458295	0.453634	0.436815	0.459594	0.456788	0.454899	0.460489	0.44848	0.454657	0.459945	0.449557	0.457307	0.450022	0.456686	0.450859	0.458446	0.454876	0.455213	0.470406	0.442324	0.446719	0.45909	0.454905	0.454139	0.452205	0.447099	0.451168	0.458092	0.448182	0.450967	0.460512	0.454907	0.469855	0.450007	0.458488	0.460479
14.8814		0.438837	0.455981	0.437634	0.450714	0.439041	0.458477	0.460498	0.455671	0.446435	0.44218	0.450717	0.44777	0.452312	0.447803	0.431509	0.453829	0.450538	0.448856	0.454171	0.442678	0.448691	0.454094	0.443494	0.451351	0.444144	0.450449	0.444796	0.452149	0.448672	0.44905	0.464131	0.436346	0.44078	0.452742	0.448876	0.44808	0.446247	0.441246	0.445588	0.452851	0.442465	0.445181	0.454481	0.448953	0.463052	0.444141	0.452452	0.454504
15.2836		0.433226	0.449928	0.431616	0.444463	0.43352	0.452072	0.455203	0.449618	0.441254	0.436728	0.444911	0.441978	0.446396	0.442037	0.426229	0.448138	0.444308	0.442859	0.447875	0.437014	0.442816	0.44824	0.437463	0.445511	0.438331	0.444287	0.438839	0.445768	0.442409	0.442957	0.45782	0.430365	0.434829	0.446347	0.442882	0.442136	0.440322	0.435474	0.440021	0.447703	0.436896	0.439526	0.448529	0.443171	0.456258	0.438366	0.446492	0.448725
15.6858		0.427685	0.443942	0.425614	0.438271	0.428099	0.445737	0.450086	0.443641	0.436146	0.431278	0.439243	0.436283	0.440562	0.436342	0.420986	0.442529	0.43815	0.43693	0.441669	0.431491	0.437049	0.442402	0.431487	0.439794	0.432591	0.438221	0.432999	0.439355	0.436126	0.43695	0.451528	0.424403	0.428898	0.439943	0.436952	0.436308	0.434465	0.429788	0.434472	0.442619	0.431464	0.434002	0.442666	0.437558	0.449581	0.432699	0.440626	0.443136
16.088		0.422212	0.438066	0.419676	0.432188	0.422787	0.439534	0.445121	0.437777	0.431093	0.425814	0.433715	0.430703	0.434835	0.430737	0.415802	0.437019	0.432121	0.431099	0.435622	0.426117	0.431411	0.436613	0.425598	0.434213	0.426941	0.432281	0.427296	0.432979	0.429878	0.431059	0.445327	0.418504	0.423034	0.433589	0.431123	0.43061	0.428715	0.424202	0.428958	0.437584	0.426159	0.428612	0.436913	0.432115	0.443127	0.427164	0.434884	0.437732
16.4901		0.416812	0.432342	0.41385	0.426264	0.417594	0.433519	0.440285	0.432057	0.42608	0.42034	0.428334	0.42526	0.429242	0.425247	0.410708	0.431628	0.426273	0.425397	0.429788	0.420898	0.425926	0.430912	0.41983	0.428783	0.421398	0.426494	0.42175	0.426707	0.423729	0.425313	0.439285	0.412715	0.417283	0.427351	0.42543	0.425056	0.423114	0.418737	0.423503	0.432595	0.420969	0.423363	0.431296	0.426842	0.436972	0.421779	0.429292	0.432506
16.8923		0.411497	0.426801	0.408175	0.420535	0.412526	0.427729	0.435557	0.426506	0.421102	0.414876	0.423101	0.419971	0.423808	0.419895	0.405724	0.42637	0.420635	0.419847	0.424198	0.415833	0.420605	0.425335	0.414213	0.423511	0.415975	0.420885	0.416373	0.420598	0.417738	0.419739	0.433454	0.407082	0.411681	0.421291	0.419898	0.41966	0.417692	0.413414	0.418134	0.427648	0.415878	0.418253	0.425836	0.421734	0.431157	0.416554	0.423869	0.427444
17.2945		0.406276	0.421457	0.402678	0.415024	0.407581	0.422176	0.430913	0.42113	0.416155	0.40945	0.418011	0.414843	0.418546	0.414696	0.400863	0.421256	0.41522	0.414462	0.418859	0.410911	0.415455	0.419907	0.408765	0.4184	0.41068	0.415462	0.411169	0.414695	0.411951	0.414353	0.427866	0.401642	0.406253	0.415458	0.414542	0.414427	0.412467	0.408244	0.412872	0.422745	0.410865	0.413276	0.420546	0.416778	0.425683	0.411487	0.418621	0.422525
17.6967		0.401161	0.416314	0.397374	0.409737	0.402753	0.416855	0.426327	0.415927	0.41124	0.404097	0.413055	0.409877	0.41346	0.409657	0.396126	0.416285	0.410018	0.409245	0.413755	0.406116	0.410472	0.414643	0.403495	0.413444	0.405512	0.410228	0.406135	0.409028	0.406398	0.409162	0.422529	0.396416	0.40101	0.409885	0.409366	0.409354	0.407446	0.403234	0.407735	0.417885	0.405912	0.408421	0.415433	0.411956	0.420518	0.406566	0.413542	0.417724
18.0989		0.396163	0.411361	0.392269	0.404671	0.398033	0.411742	0.421779	0.410885	0.406359	0.398852	0.408219	0.405063	0.408546	0.404776	0.391508	0.411452	0.405009	0.404192	0.408858	0.401427	0.405643	0.409546	0.398407	0.408631	0.400468	0.405177	0.401263	0.403608	0.401095	0.404169	0.417431	0.391413	0.395955	0.404588	0.404363	0.404435	0.402623	0.398384	0.402734	0.413068	0.401007	0.403671	0.410492	0.407248	0.415608	0.401771	0.408618	0.413016
18.5011		0.391294	0.406584	0.387359	0.399813	0.393411	0.406811	0.417252	0.405988	0.401523	0.393745	0.403489	0.400389	0.403793	0.400049	0.386996	0.406748	0.400166	0.399298	0.404132	0.396825	0.400957	0.404615	0.393496	0.403951	0.395546	0.400298	0.396541	0.398442	0.396046	0.399367	0.412547	0.386629	0.391085	0.399567	0.399524	0.399657	0.397985	0.393686	0.397875	0.408298	0.396145	0.399014	0.405716	0.402634	0.410891	0.397084	0.403832	0.408377
18.9033		0.386567	0.401965	0.382641	0.395147	0.388882	0.402032	0.412736	0.401222	0.396745	0.388802	0.398856	0.395841	0.399186	0.395466	0.382583	0.402162	0.395464	0.394556	0.399544	0.392296	0.396397	0.399843	0.388757	0.399392	0.390745	0.395581	0.391958	0.393524	0.391243	0.394747	0.407849	0.382052	0.386393	0.394809	0.394838	0.39501	0.393513	0.389133	0.393161	0.403581	0.391333	0.394437	0.401095	0.3981	0.40631	0.392489	0.399167	0.403794
19.3055		0.381991	0.397488	0.378109	0.390656	0.384441	0.397386	0.408232	0.396577	0.392042	0.384042	0.394312	0.391406	0.394712	0.391017	0.37826	0.397685	0.390884	0.389961	0.395071	0.387835	0.391951	0.395221	0.384185	0.394947	0.386067	0.391018	0.387508	0.388847	0.386674	0.390301	0.403307	0.377664	0.381875	0.390294	0.390293	0.390483	0.389189	0.384715	0.388594	0.398928	0.38659	0.389937	0.396617	0.393639	0.401819	0.387979	0.394612	0.39926
19.7077		0.377575	0.393142	0.373759	0.386327	0.380094	0.39286	0.40375	0.39205	0.387435	0.379474	0.389857	0.387078	0.390358	0.386694	0.374026	0.393311	0.386416	0.385512	0.390698	0.383445	0.387612	0.390744	0.379776	0.390612	0.38152	0.386602	0.383184	0.384402	0.382324	0.386017	0.3989	0.373445	0.377527	0.385994	0.385883	0.386072	0.384998	0.380423	0.384175	0.394352	0.381942	0.385514	0.392273	0.389251	0.397393	0.383554	0.390163	0.394781
20.1099		0.373326	0.38892	0.369587	0.382151	0.375847	0.388449	0.399304	0.387641	0.382946	0.375104	0.385497	0.382854	0.386117	0.38249	0.369883	0.389039	0.38206	0.38121	0.386422	0.379137	0.383375	0.386408	0.375526	0.386386	0.377115	0.382333	0.378988	0.380178	0.378176	0.381887	0.394611	0.369377	0.373347	0.381882	0.381606	0.381775	0.380926	0.376251	0.379904	0.389873	0.377417	0.381177	0.388058	0.384944	0.393026	0.379224	0.385823	0.390368
20.5121		0.369245	0.384818	0.365591	0.37812	0.371712	0.38416	0.394917	0.383358	0.378593	0.370929	0.381242	0.378736	0.381987	0.378403	0.36584	0.384872	0.377823	0.377057	0.382247	0.374929	0.379242	0.382212	0.371433	0.382272	0.372863	0.37821	0.374921	0.376162	0.374217	0.377903	0.390435	0.365447	0.369333	0.37793	0.377462	0.377596	0.376966	0.372196	0.375782	0.385508	0.373046	0.376938	0.383967	0.38073	0.388731	0.375003	0.381602	0.386039
20.9143		0.365333	0.380839	0.361768	0.374231	0.367703	0.379999	0.390612	0.37921	0.374394	0.366943	0.377103	0.374732	0.377968	0.374433	0.361906	0.380815	0.373718	0.373057	0.378185	0.37084	0.375219	0.378155	0.367495	0.378275	0.368773	0.374234	0.370987	0.372341	0.370432	0.374058	0.386372	0.361645	0.365482	0.374119	0.373455	0.373542	0.373115	0.368256	0.371808	0.381275	0.368852	0.372812	0.38	0.376625	0.384528	0.370905	0.377512	0.381815
21.3165		0.361584	0.376986	0.358115	0.370482	0.363831	0.375979	0.386412	0.375205	0.37036	0.363135	0.373094	0.370849	0.374066	0.370581	0.358094	0.376877	0.36976	0.369213	0.374246	0.366888	0.371312	0.374238	0.363709	0.374399	0.364854	0.370407	0.36719	0.3687	0.366813	0.370345	0.382427	0.357966	0.361791	0.370431	0.369591	0.369622	0.369376	0.364433	0.367983	0.37719	0.36485	0.368815	0.376158	0.372643	0.380447	0.366949	0.373566	0.377715
21.7187		0.357992	0.373262	0.354625	0.366871	0.360106	0.372107	0.382338	0.371351	0.366497	0.359496	0.369226	0.367097	0.370286	0.36685	0.354412	0.373067	0.365958	0.365525	0.370443	0.363086	0.367528	0.370461	0.360072	0.370648	0.361108	0.366729	0.363531	0.365226	0.363349	0.366757	0.378605	0.354407	0.358255	0.366855	0.365873	0.365844	0.365752	0.360729	0.364304	0.373263	0.361047	0.364961	0.372441	0.368799	0.376514	0.363145	0.369776	0.373755
22.1209		0.354547	0.36967	0.351292	0.363395	0.356535	0.36839	0.378404	0.367652	0.362805	0.356011	0.365508	0.363482	0.366633	0.363242	0.350868	0.36939	0.362323	0.361993	0.366781	0.359443	0.363873	0.366822	0.356581	0.367025	0.357533	0.363197	0.36001	0.361903	0.360029	0.363291	0.374915	0.350969	0.354864	0.363384	0.362304	0.362215	0.362247	0.357147	0.360768	0.369501	0.35744	0.361259	0.36885	0.3651	0.37275	0.359501	0.366146	0.369945
22.5231		0.35124	0.366209	0.348105	0.360051	0.353118	0.364831	0.374618	0.364107	0.35928	0.35267	0.361943	0.360006	0.363111	0.359757	0.347463	0.365853	0.358853	0.358611	0.363264	0.355961	0.36035	0.36332	0.35323	0.363529	0.354121	0.359804	0.356626	0.358713	0.356843	0.359938	0.371359	0.347653	0.351609	0.360017	0.358884	0.358737	0.358863	0.353689	0.35737	0.365905	0.354014	0.357715	0.365384	0.36155	0.369166	0.35602	0.362677	0.366291
22.9253		0.348058	0.362877	0.345051	0.356835	0.349853	0.361426	0.370985	0.360712	0.355913	0.349459	0.35853	0.35667	0.359723	0.356395	0.344196	0.362453	0.355545	0.355374	0.359889	0.352635	0.356959	0.359946	0.350011	0.36016	0.350863	0.356544	0.353371	0.355641	0.35378	0.356694	0.367939	0.344457	0.348478	0.35675	0.355608	0.355407	0.3556	0.350354	0.354102	0.362471	0.350753	0.354326	0.36204	0.358147	0.365763	0.352698	0.359362	0.362792
23.3275		0.34499	0.359667	0.342115	0.353739	0.346729	0.358169	0.3675	0.357456	0.352693	0.346363	0.355264	0.353467	0.356465	0.353152	0.341059	0.359187	0.352389	0.35227	0.356649	0.349455	0.353695	0.356695	0.346916	0.356913	0.347742	0.353404	0.350238	0.352671	0.350824	0.353553	0.364651	0.341378	0.345458	0.353583	0.352467	0.352219	0.352453	0.347141	0.350952	0.359191	0.347632	0.351089	0.358815	0.354884	0.362533	0.349525	0.356189	0.359442
23.7297		0.342024	0.356569	0.339281	0.350754	0.343736	0.355049	0.364158	0.354326	0.349608	0.343368	0.352135	0.350389	0.353331	0.350021	0.33804	0.356046	0.349367	0.349287	0.353535	0.346405	0.350552	0.353555	0.343934	0.353781	0.344741	0.350374	0.347217	0.349788	0.34796	0.350509	0.361488	0.338408	0.342536	0.350513	0.349447	0.34916	0.349415	0.344044	0.347908	0.356053	0.344626	0.347993	0.355702	0.351752	0.359458	0.346488	0.353142	0.356232
24.1319		0.339147	0.353571	0.336531	0.34787	0.340857	0.352052	0.360947	0.351307	0.346643	0.340459	0.34913	0.347423	0.350314	0.346994	0.335125	0.353019	0.346463	0.346411	0.350535	0.343469	0.347518	0.350517	0.341056	0.350757	0.341843	0.347441	0.344297	0.346976	0.345174	0.347556	0.358439	0.33554	0.339699	0.347537	0.346534	0.346216	0.346475	0.341057	0.344955	0.353046	0.341713	0.345026	0.352691	0.348737	0.356516	0.343573	0.350202	0.35315
24.5341		0.336347	0.350661	0.333849	0.345074	0.338074	0.349164	0.357855	0.348384	0.343785	0.337624	0.346234	0.344558	0.347403	0.344062	0.332301	0.350093	0.343657	0.343625	0.347634	0.34063	0.344585	0.347568	0.338267	0.347831	0.339028	0.34459	0.341466	0.344224	0.342451	0.344686	0.355491	0.33276	0.336936	0.344647	0.343711	0.343369	0.34362	0.338171	0.342077	0.350153	0.338871	0.342174	0.349775	0.345825	0.353683	0.340762	0.347348	0.350181
24.9363		0.333613	0.347826	0.331221	0.342356	0.335372	0.346369	0.35487	0.34554	0.341021	0.33485	0.343432	0.34178	0.344584	0.341215	0.329553	0.347254	0.340931	0.340915	0.344822	0.337868	0.341739	0.3447	0.335558	0.344993	0.336281	0.34181	0.338713	0.341522	0.339777	0.341894	0.352632	0.330057	0.334236	0.341838	0.340962	0.340603	0.340836	0.335377	0.339263	0.34736	0.336085	0.339421	0.346944	0.343002	0.350936	0.338039	0.344565	0.347312
25.3385		0.330936	0.345055	0.328632	0.339702	0.332733	0.34365	0.35198	0.342762	0.33834	0.332127	0.340709	0.339076	0.341847	0.338443	0.326871	0.344491	0.338268	0.338267	0.342086	0.33517	0.338972	0.341903	0.332917	0.342233	0.333587	0.33909	0.336028	0.33886	0.337144	0.339171	0.349848	0.327417	0.331591	0.3391	0.338272	0.337901	0.338111	0.332664	0.3365	0.344655	0.333343	0.336753	0.344189	0.340254	0.348255	0.33539	0.341836	0.344528
25.7407		0.328307	0.342336	0.326074	0.337101	0.330143	0.340995	0.349174	0.34004	0.335731	0.329448	0.338051	0.336436	0.33918	0.335738	0.324244	0.341792	0.335655	0.335668	0.339415	0.332524	0.336272	0.33917	0.330335	0.339542	0.330936	0.33642	0.333403	0.336233	0.334544	0.336513	0.347126	0.32483	0.328993	0.336425	0.335632	0.335251	0.335432	0.330023	0.33378	0.342025	0.33064	0.334155	0.341502	0.337569	0.345623	0.332802	0.33915	0.341818
26.1429		0.32572	0.339665	0.323541	0.334543	0.32759	0.33839	0.346445	0.337366	0.333186	0.326809	0.335446	0.333851	0.336573	0.333092	0.321668	0.339149	0.333083	0.33311	0.336802	0.329919	0.333631	0.336497	0.327802	0.33691	0.328321	0.333794	0.330829	0.333637	0.331977	0.333912	0.344458	0.322286	0.326437	0.333805	0.333034	0.332644	0.332794	0.327445	0.331099	0.339459	0.327974	0.331615	0.338876	0.334939	0.343032	0.330264	0.336499	0.339171
26.5451		0.323171	0.337034	0.321028	0.33202	0.325066	0.335826	0.343786	0.334734	0.330694	0.324208	0.332884	0.331315	0.334018	0.330502	0.319142	0.336555	0.330545	0.330586	0.33424	0.32735	0.33104	0.333879	0.325311	0.334329	0.325736	0.331205	0.328301	0.331069	0.32944	0.331363	0.341836	0.319779	0.323918	0.331233	0.330474	0.330075	0.33019	0.32492	0.328454	0.336949	0.325345	0.329124	0.336307	0.332357	0.340475	0.327768	0.33388	0.336578
26.9473		0.320656	0.334442	0.318535	0.329524	0.322567	0.333294	0.341191	0.332144	0.32825	0.321645	0.330358	0.328822	0.331509	0.327964	0.316663	0.334008	0.328038	0.328091	0.331724	0.324815	0.328495	0.331314	0.322858	0.331792	0.323181	0.328652	0.325813	0.328529	0.326938	0.328861	0.339255	0.317306	0.321433	0.328703	0.32795	0.327541	0.327619	0.322443	0.325846	0.334487	0.322758	0.326671	0.333789	0.329818	0.337952	0.325308	0.331292	0.334031
27.3495		0.318172	0.331888	0.316063	0.327051	0.320089	0.33079	0.338656	0.329592	0.325846	0.31912	0.327863	0.326368	0.329038	0.325475	0.314234	0.331504	0.325561	0.325624	0.329248	0.322313	0.325988	0.328801	0.320439	0.329292	0.320656	0.326131	0.323361	0.326015	0.324473	0.3264	0.33671	0.314866	0.318978	0.32621	0.325462	0.325042	0.325081	0.320006	0.323277	0.332067	0.320216	0.32425	0.331319	0.32732	0.335465	0.322881	0.328737	0.331525
27.7517		0.315718	0.32937	0.313613	0.324597	0.317632	0.328311	0.336176	0.32708	0.323475	0.316635	0.325396	0.32395	0.326602	0.323033	0.311854	0.329039	0.323114	0.323183	0.32681	0.319845	0.323514	0.326335	0.31805	0.326825	0.318162	0.323643	0.320942	0.323528	0.322049	0.323975	0.334198	0.312457	0.316552	0.323751	0.323011	0.322582	0.322576	0.317606	0.320749	0.329681	0.317721	0.321855	0.328892	0.324862	0.333015	0.320482	0.326218	0.329055
28.1539		0.313294	0.32689	0.311188	0.322158	0.3152	0.325856	0.333746	0.324606	0.321134	0.314189	0.322953	0.321565	0.324197	0.320637	0.309524	0.326612	0.320698	0.32077	0.324405	0.317412	0.321069	0.323913	0.315689	0.324387	0.3157	0.321186	0.318553	0.321069	0.319668	0.321582	0.331719	0.310082	0.314152	0.321322	0.320597	0.320162	0.320108	0.315237	0.318262	0.327324	0.315274	0.319484	0.326504	0.322442	0.330605	0.31811	0.323737	0.326617
28.5561		0.310897	0.324445	0.30879	0.319734	0.312793	0.323427	0.331362	0.32217	0.318816	0.311782	0.320535	0.319209	0.321818	0.318282	0.30724	0.324219	0.318315	0.318386	0.322031	0.315016	0.31865	0.321532	0.313357	0.321974	0.313273	0.318762	0.316193	0.318637	0.317329	0.319217	0.329271	0.30774	0.311777	0.318922	0.318221	0.317784	0.317677	0.312897	0.315817	0.324992	0.312874	0.317131	0.32415	0.32006	0.328238	0.315761	0.321297	0.324208
28.9583		0.308529	0.322035	0.306421	0.317324	0.310415	0.321027	0.329016	0.31977	0.316518	0.309414	0.31814	0.316879	0.319462	0.315966	0.305	0.321857	0.315965	0.316032	0.319685	0.312657	0.316252	0.319186	0.311052	0.319586	0.310882	0.31637	0.313859	0.316232	0.315033	0.316876	0.326854	0.305433	0.309428	0.316547	0.315881	0.31545	0.315283	0.310582	0.313414	0.322679	0.31052	0.314797	0.321827	0.317715	0.325913	0.313434	0.318898	0.321824
29.3605		0.30619	0.31966	0.304082	0.314931	0.30807	0.318657	0.326704	0.317404	0.314238	0.307084	0.315769	0.314572	0.317126	0.313684	0.302796	0.319523	0.31365	0.31371	0.317365	0.310335	0.313876	0.316871	0.308777	0.317222	0.308529	0.314011	0.311552	0.313856	0.312777	0.314558	0.324467	0.30316	0.307104	0.314197	0.313577	0.313157	0.312925	0.308291	0.31105	0.320383	0.308205	0.312481	0.319529	0.315405	0.323628	0.311127	0.31654	0.319464
29.7627		0.303879	0.317316	0.301776	0.312556	0.30576	0.316322	0.32442	0.31507	0.311977	0.304788	0.313424	0.312288	0.31481	0.311434	0.300624	0.317213	0.31137	0.311421	0.315069	0.308049	0.311519	0.314583	0.306531	0.314883	0.306213	0.311686	0.309273	0.311509	0.310557	0.312261	0.322109	0.30092	0.304806	0.31187	0.311306	0.310906	0.310603	0.306024	0.308723	0.318101	0.305927	0.310184	0.317254	0.31313	0.321383	0.30884	0.314222	0.317128
30.1649		0.3016	0.315004	0.299503	0.310203	0.303488	0.314022	0.322158	0.312767	0.309734	0.302527	0.311107	0.310026	0.312512	0.309209	0.298476	0.314926	0.309126	0.309166	0.312795	0.305799	0.309184	0.312319	0.304315	0.31257	0.303935	0.309394	0.30702	0.309192	0.308371	0.309986	0.319781	0.298711	0.302536	0.309564	0.309066	0.308691	0.308316	0.303779	0.30643	0.315834	0.30368	0.307907	0.314999	0.310889	0.319172	0.306573	0.311944	0.314816
30.5671		0.299351	0.312723	0.297264	0.307876	0.301257	0.311761	0.319916	0.310494	0.307513	0.300298	0.308819	0.307787	0.310236	0.307008	0.296348	0.312662	0.306917	0.306945	0.310546	0.303584	0.306873	0.310076	0.30213	0.310286	0.301693	0.307136	0.304798	0.306907	0.306215	0.307733	0.317483	0.296533	0.300297	0.30728	0.306855	0.306512	0.306062	0.301557	0.304168	0.313582	0.301461	0.305655	0.312764	0.308681	0.316994	0.304328	0.309703	0.312532
30.9693		0.297134	0.310473	0.29506	0.305581	0.299068	0.309538	0.317693	0.308249	0.305317	0.298101	0.306565	0.305573	0.307982	0.304827	0.294237	0.31042	0.304743	0.304758	0.308321	0.301404	0.30459	0.307854	0.299975	0.308033	0.299486	0.304913	0.302606	0.304657	0.304087	0.305506	0.315214	0.294383	0.298091	0.305018	0.304673	0.304363	0.303841	0.299359	0.301936	0.311349	0.299267	0.30343	0.31055	0.306506	0.314845	0.302106	0.307501	0.310277
31.3715		0.294951	0.308253	0.292892	0.303322	0.296922	0.30735	0.315487	0.306033	0.303149	0.295935	0.304347	0.303387	0.305754	0.302666	0.292143	0.308204	0.302604	0.302604	0.306123	0.29926	0.302338	0.305654	0.297849	0.305813	0.297312	0.302725	0.300446	0.302442	0.301986	0.303305	0.312974	0.292262	0.29592	0.302777	0.302518	0.302241	0.301653	0.297188	0.299733	0.309138	0.297098	0.301238	0.308359	0.304362	0.31272	0.29991	0.305338	0.308057
31.7737		0.292799	0.306065	0.290758	0.301103	0.294817	0.305196	0.3133	0.303847	0.301011	0.2938	0.302167	0.301233	0.303557	0.300521	0.290067	0.306017	0.300497	0.300481	0.303953	0.297156	0.300121	0.303477	0.295746	0.303627	0.29517	0.300572	0.29832	0.300263	0.299911	0.301131	0.31076	0.290168	0.293784	0.300557	0.300388	0.300144	0.299498	0.295042	0.297558	0.306952	0.294958	0.29908	0.306193	0.30225	0.310619	0.297744	0.303215	0.305873
32.1759		0.290679	0.303906	0.288657	0.298926	0.292752	0.303069	0.311132	0.301689	0.298905	0.291695	0.300026	0.299111	0.301393	0.298395	0.288015	0.303859	0.29842	0.298384	0.301812	0.295095	0.29794	0.301323	0.293663	0.301474	0.293058	0.298451	0.296226	0.298119	0.297859	0.298985	0.308566	0.288103	0.291683	0.298356	0.298282	0.298068	0.297374	0.292923	0.295411	0.304794	0.292849	0.296958	0.304054	0.300169	0.308537	0.29561	0.301136	0.303731
32.5781		0.288588	0.301776	0.286586	0.296793	0.290721	0.300963	0.308983	0.29956	0.29683	0.28962	0.297922	0.297022	0.299262	0.296287	0.285991	0.301733	0.29637	0.296308	0.299701	0.293079	0.295795	0.299192	0.291592	0.299351	0.290974	0.296361	0.294163	0.296008	0.295829	0.296865	0.306387	0.286064	0.289615	0.29617	0.296196	0.29601	0.295281	0.29083	0.29329	0.302663	0.290778	0.294874	0.301941	0.298116	0.306472	0.293509	0.299103	0.30163
32.9803		0.286522	0.29967	0.28454	0.294701	0.288718	0.29887	0.306855	0.297456	0.294783	0.28757	0.295853	0.294964	0.297165	0.294196	0.284002	0.299638	0.294344	0.294248	0.297619	0.291111	0.293683	0.297081	0.289524	0.297254	0.288914	0.294297	0.292126	0.293926	0.293818	0.294769	0.304213	0.284052	0.287575	0.293992	0.294127	0.293967	0.293214	0.288758	0.291195	0.300558	0.28875	0.292824	0.299855	0.29609	0.30442	0.291442	0.297116	0.299572
33.3825		0.284479	0.297583	0.282513	0.292648	0.286737	0.296782	0.304744	0.295375	0.292759	0.285543	0.293812	0.292934	0.295098	0.292121	0.28205	0.29757	0.292334	0.292194	0.295563	0.289195	0.291601	0.294985	0.287449	0.295175	0.286876	0.292254	0.29011	0.291868	0.29182	0.292691	0.302033	0.282064	0.285559	0.291816	0.292069	0.291934	0.291169	0.286703	0.289123	0.298476	0.286769	0.290806	0.29779	0.294087	0.302378	0.289405	0.295175	0.297553
33.7847		0.282452	0.29551	0.2805	0.290626	0.284769	0.29469	0.302648	0.293311	0.290754	0.283534	0.291794	0.290924	0.293056	0.290061	0.280138	0.295526	0.290337	0.29014	0.293527	0.287329	0.289541	0.292898	0.285359	0.293107	0.284857	0.290227	0.288108	0.289827	0.289831	0.290626	0.299838	0.280098	0.283559	0.289633	0.290017	0.289908	0.289141	0.28466	0.287069	0.29641	0.284839	0.288813	0.295742	0.292103	0.30034	0.287394	0.293279	0.295568
34.1869		0.280438	0.293443	0.278495	0.288631	0.282807	0.292587	0.300563	0.291259	0.288762	0.281538	0.28979	0.288929	0.291032	0.288011	0.278265	0.293498	0.288346	0.288078	0.291507	0.285512	0.287496	0.290812	0.283246	0.291043	0.282853	0.288209	0.286114	0.287797	0.287845	0.288569	0.297618	0.278147	0.28157	0.287435	0.287964	0.287884	0.287123	0.282622	0.285029	0.294356	0.28296	0.286838	0.293705	0.290133	0.298302	0.285403	0.291422	0.293613
34.5891		0.278432	0.291375	0.276492	0.286655	0.280845	0.290468	0.298485	0.289211	0.286777	0.279548	0.287793	0.286941	0.289019	0.285969	0.276426	0.291481	0.286356	0.286001	0.289495	0.283738	0.28546	0.288723	0.281104	0.288976	0.28086	0.286196	0.284121	0.285771	0.285859	0.286514	0.295366	0.276208	0.279585	0.285216	0.285906	0.285859	0.285111	0.280584	0.282998	0.292306	0.281128	0.284876	0.291673	0.28817	0.296258	0.283426	0.289598	0.291678
34.9913		0.27643	0.289303	0.274487	0.28469	0.278877	0.28833	0.29641	0.287163	0.284797	0.277561	0.285796	0.284956	0.287011	0.283931	0.274616	0.289467	0.284361	0.283906	0.287485	0.282	0.283427	0.286623	0.278933	0.286901	0.278875	0.284183	0.282125	0.283747	0.283868	0.284456	0.29308	0.274275	0.277599	0.282974	0.283839	0.28383	0.283098	0.278539	0.280972	0.290256	0.279336	0.282919	0.289641	0.286212	0.294205	0.281455	0.287798	0.289755
35.3935		0.274428	0.287222	0.27248	0.28273	0.276903	0.286172	0.294333	0.28511	0.282817	0.275572	0.283794	0.282967	0.285001	0.281895	0.272825	0.287452	0.28236	0.281794	0.285471	0.280286	0.281391	0.284511	0.276737	0.284817	0.276894	0.282168	0.280122	0.281721	0.281871	0.282395	0.290763	0.272342	0.27561	0.280709	0.281763	0.281796	0.281083	0.276486	0.278948	0.288202	0.277574	0.280961	0.287605	0.284252	0.29214	0.279484	0.286012	0.287837
35.7957		0.272427	0.285134	0.270469	0.280769	0.27492	0.283999	0.292256	0.283051	0.280837	0.27358	0.281786	0.280974	0.282986	0.279857	0.271042	0.285431	0.28035	0.279666	0.283449	0.278585	0.27935	0.282387	0.274524	0.282725	0.274915	0.280149	0.278113	0.279694	0.27987	0.280329	0.288422	0.270406	0.273617	0.278429	0.27968	0.279757	0.279064	0.274426	0.276922	0.286144	0.275828	0.278999	0.285564	0.282289	0.290064	0.277509	0.28423	0.285915
36.1979		0.270426	0.28304	0.268458	0.278803	0.272931	0.281818	0.290177	0.280986	0.278858	0.271585	0.27977	0.278975	0.280966	0.277819	0.269258	0.283405	0.278333	0.27753	0.281417	0.276882	0.277303	0.280256	0.272307	0.280627	0.272935	0.278129	0.276101	0.277667	0.277867	0.278262	0.286072	0.268466	0.271622	0.276144	0.277594	0.277719	0.277041	0.272361	0.274897	0.284081	0.274085	0.27703	0.283519	0.280322	0.287978	0.275527	0.28244	0.283984
36.6001		0.268429	0.280945	0.266451	0.276829	0.27094	0.27964	0.288101	0.278919	0.27688	0.269592	0.277749	0.276973	0.278941	0.275782	0.267462	0.281375	0.276313	0.275397	0.279375	0.275161	0.275252	0.278125	0.270102	0.27853	0.270955	0.276109	0.27409	0.275644	0.275868	0.276198	0.283731	0.26652	0.269627	0.273872	0.275514	0.275685	0.275016	0.270297	0.272873	0.282018	0.27233	0.275055	0.281475	0.27835	0.285887	0.273539	0.280633	0.282039
37.0023		0.266438	0.278855	0.264452	0.274847	0.268951	0.277476	0.286031	0.276854	0.274906	0.267605	0.275727	0.27497	0.276915	0.273749	0.265647	0.279344	0.274296	0.273278	0.277328	0.27341	0.273202	0.276005	0.267928	0.276442	0.268975	0.274094	0.272087	0.273629	0.273878	0.274142	0.281417	0.264571	0.267637	0.271629	0.27345	0.273663	0.272994	0.268242	0.270854	0.279961	0.27055	0.273075	0.279437	0.276376	0.283797	0.271547	0.2788	0.280077
37.4045		0.264459	0.276778	0.262467	0.272858	0.266969	0.27534	0.283974	0.274799	0.272938	0.265628	0.273709	0.272972	0.274892	0.271725	0.263805	0.277316	0.272287	0.271188	0.275278	0.271617	0.271155	0.273906	0.265804	0.27437	0.266998	0.272088	0.270098	0.271628	0.271905	0.272103	0.279151	0.262624	0.265658	0.269437	0.271411	0.271659	0.270978	0.266206	0.268845	0.277916	0.268734	0.271094	0.27741	0.274403	0.281717	0.269557	0.276935	0.278098
37.8067		0.262497	0.274721	0.260501	0.270864	0.264998	0.273243	0.281937	0.27276	0.27098	0.26367	0.2717	0.270982	0.272877	0.269716	0.261934	0.275297	0.270295	0.269139	0.273234	0.269771	0.269118	0.271838	0.263743	0.272322	0.265027	0.270095	0.26813	0.269644	0.269953	0.270085	0.276948	0.260683	0.263695	0.267311	0.269406	0.269679	0.268974	0.264197	0.266849	0.27589	0.266876	0.269115	0.275402	0.272434	0.279654	0.267574	0.275033	0.276104
38.2089		0.260556	0.27269	0.258558	0.268868	0.263043	0.271196	0.279924	0.270744	0.269034	0.261732	0.269704	0.269005	0.270875	0.267725	0.260032	0.273291	0.268324	0.26714	0.271201	0.267869	0.267096	0.269811	0.261758	0.270305	0.263064	0.268118	0.266185	0.267682	0.268028	0.268095	0.274822	0.258754	0.261752	0.265265	0.267442	0.26773	0.266983	0.262222	0.264871	0.273888	0.264971	0.267145	0.273417	0.270473	0.277614	0.265605	0.273093	0.274096
38.6111		0.258638	0.270687	0.256638	0.266874	0.261107	0.269203	0.27794	0.268752	0.2671	0.25982	0.267724	0.267044	0.26889	0.265755	0.2581	0.271302	0.266377	0.265197	0.269186	0.26591	0.265094	0.267828	0.259853	0.268321	0.261112	0.266159	0.264265	0.265743	0.266132	0.266136	0.272778	0.256841	0.259832	0.263308	0.26552	0.265812	0.265011	0.260286	0.262913	0.271916	0.263021	0.265186	0.271459	0.268522	0.275603	0.263654	0.271115	0.272078
39.0133		0.256744	0.268715	0.254742	0.264884	0.259191	0.267268	0.275987	0.266788	0.26518	0.257933	0.265763	0.2651	0.266924	0.263809	0.256141	0.269332	0.264457	0.263313	0.267193	0.263897	0.263114	0.265892	0.258028	0.266374	0.259174	0.264219	0.262371	0.263828	0.264265	0.264209	0.270815	0.254949	0.257938	0.26144	0.263641	0.263927	0.263058	0.25839	0.260975	0.269974	0.26103	0.263243	0.26953	0.266583	0.273621	0.261725	0.269103	0.270054
39.4155		0.254875	0.266774	0.252867	0.262903	0.257294	0.265387	0.274064	0.26485	0.263275	0.256071	0.26382	0.263174	0.264978	0.261887	0.25416	0.267381	0.262561	0.261483	0.265224	0.261838	0.261158	0.264001	0.256275	0.264462	0.25725	0.262296	0.260499	0.261936	0.262425	0.262312	0.268928	0.253079	0.256068	0.259659	0.261799	0.26207	0.261124	0.256535	0.259056	0.268064	0.259005	0.261318	0.267629	0.264656	0.271669	0.259821	0.267064	0.268029
39.8177		0.253028	0.264862	0.25101	0.260932	0.255414	0.263555	0.27217	0.262935	0.261385	0.254232	0.261895	0.261266	0.263053	0.259987	0.252161	0.26545	0.260688	0.259701	0.263281	0.259743	0.259227	0.26215	0.254585	0.262584	0.25534	0.260391	0.258647	0.260065	0.260609	0.260444	0.267105	0.251231	0.254222	0.257953	0.259989	0.260239	0.259209	0.254717	0.257155	0.266183	0.256956	0.259411	0.265755	0.262742	0.269742	0.25794	0.265004	0.266006
40.2199		0.251201	0.262974	0.249168	0.258973	0.253548	0.261762	0.270301	0.261039	0.259508	0.252412	0.259987	0.259376	0.261149	0.258107	0.250151	0.263538	0.258832	0.257955	0.261363	0.257626	0.257321	0.260333	0.252942	0.260735	0.253444	0.258502	0.25681	0.258213	0.258814	0.2586	0.265334	0.249405	0.252396	0.25631	0.258203	0.258427	0.257311	0.25293	0.25527	0.264329	0.254895	0.257523	0.263907	0.26084	0.267838	0.256082	0.262932	0.263989
40.6221		0.249392	0.261108	0.247338	0.257027	0.251693	0.259999	0.268454	0.259159	0.257646	0.250609	0.258095	0.257501	0.259265	0.256243	0.248137	0.261645	0.25699	0.256236	0.259467	0.2555	0.255439	0.258543	0.251333	0.258912	0.251561	0.256628	0.254986	0.256377	0.257034	0.256777	0.263598	0.247598	0.250589	0.254713	0.256434	0.256629	0.255428	0.25117	0.253398	0.262498	0.252831	0.255652	0.262082	0.258949	0.265951	0.254244	0.260859	0.261982
41.0243		0.247598	0.259259	0.245517	0.255095	0.249846	0.258255	0.266624	0.25729	0.255797	0.24882	0.256217	0.255642	0.2574	0.254393	0.246127	0.259768	0.255157	0.254532	0.257593	0.253379	0.253579	0.256772	0.249743	0.257109	0.24969	0.254767	0.253173	0.254555	0.255266	0.254971	0.261885	0.245809	0.248796	0.253145	0.254675	0.254842	0.253558	0.24943	0.251538	0.260685	0.250778	0.253797	0.260277	0.257069	0.264075	0.252423	0.258795	0.259989
41.4265		0.245817	0.257424	0.243704	0.253179	0.248005	0.256521	0.264809	0.255432	0.253964	0.247042	0.254353	0.253797	0.255553	0.252555	0.244128	0.257909	0.253332	0.252835	0.255737	0.251276	0.251738	0.255015	0.248161	0.255322	0.247833	0.25292	0.251369	0.252746	0.253507	0.25318	0.260181	0.244035	0.247018	0.251591	0.252922	0.253061	0.251699	0.247706	0.249689	0.258887	0.248744	0.251956	0.258491	0.255201	0.262209	0.250614	0.256749	0.258012
41.8287		0.244049	0.2556	0.241899	0.251278	0.246168	0.254789	0.263005	0.253582	0.252145	0.245277	0.252502	0.251967	0.253724	0.250726	0.242148	0.256067	0.251513	0.251136	0.253897	0.249203	0.249917	0.253266	0.246577	0.253548	0.24599	0.251087	0.249576	0.250948	0.251756	0.2514	0.258475	0.242276	0.245251	0.250038	0.251173	0.251285	0.249852	0.245993	0.24785	0.257099	0.24674	0.25013	0.25672	0.253344	0.260348	0.248815	0.254729	0.256056
42.2309		0.242293	0.253785	0.240104	0.249394	0.244337	0.253052	0.261211	0.251739	0.25034	0.243523	0.250664	0.250152	0.251912	0.248907	0.240196	0.254241	0.249699	0.249431	0.252071	0.247171	0.248112	0.25152	0.244984	0.251782	0.244161	0.249267	0.247793	0.249161	0.250011	0.24963	0.25676	0.240529	0.243495	0.248475	0.249425	0.249515	0.248015	0.244289	0.246024	0.255319	0.244772	0.248317	0.254964	0.251501	0.258493	0.247024	0.252742	0.254125
42.6331		0.240547	0.251977	0.238318	0.247528	0.242512	0.251306	0.259423	0.249905	0.248551	0.241781	0.248838	0.24835	0.250115	0.247095	0.238278	0.252431	0.24789	0.247719	0.250257	0.245187	0.246321	0.249774	0.243376	0.250022	0.24235	0.247461	0.246023	0.247384	0.248272	0.247868	0.255028	0.238793	0.24175	0.246892	0.247679	0.247751	0.24619	0.242589	0.244208	0.253545	0.242846	0.246517	0.253218	0.249672	0.256643	0.245239	0.250794	0.252219
43.0353		0.238813	0.250176	0.236543	0.245683	0.240696	0.249549	0.257642	0.248078	0.246775	0.240051	0.247025	0.246562	0.248331	0.245292	0.236398	0.250637	0.246089	0.245998	0.248452	0.243257	0.244543	0.248026	0.24175	0.248264	0.240556	0.245667	0.244264	0.245619	0.246539	0.246112	0.253277	0.23707	0.240013	0.245283	0.245934	0.245994	0.244378	0.240891	0.242405	0.251774	0.240966	0.24473	0.251482	0.24786	0.2548	0.24346	0.248888	0.250343
43.4375		0.237088	0.248379	0.234779	0.243858	0.238891	0.24778	0.255866	0.246258	0.24501	0.238334	0.245223	0.244786	0.24656	0.243497	0.234561	0.248855	0.244295	0.244269	0.246655	0.241384	0.242774	0.246273	0.240102	0.246508	0.238782	0.243887	0.242517	0.243863	0.244812	0.244358	0.251501	0.235358	0.238285	0.243647	0.244191	0.244245	0.242578	0.239194	0.240614	0.250006	0.239135	0.242957	0.249751	0.246064	0.252964	0.241686	0.247023	0.248495
43.8397		0.235371	0.246586	0.233028	0.242055	0.237099	0.245999	0.254094	0.244446	0.243255	0.236629	0.243434	0.243021	0.244797	0.241711	0.232766	0.247084	0.242511	0.242534	0.244864	0.239568	0.241012	0.244514	0.238431	0.24475	0.237028	0.242119	0.240779	0.242115	0.243091	0.242605	0.249702	0.233658	0.236564	0.24198	0.242448	0.242504	0.240791	0.237496	0.238835	0.248238	0.237351	0.241198	0.248024	0.244284	0.251137	0.239919	0.245201	0.246677
44.2419		0.233662	0.244798	0.231288	0.240273	0.235324	0.244211	0.252326	0.242642	0.241508	0.234935	0.241656	0.241266	0.243043	0.239933	0.231012	0.245322	0.240738	0.240795	0.243076	0.237806	0.239255	0.242748	0.236738	0.242992	0.235293	0.240362	0.239048	0.240375	0.241375	0.240851	0.247879	0.231969	0.23485	0.240284	0.240708	0.240771	0.239016	0.235795	0.237067	0.246472	0.235612	0.239452	0.246298	0.24252	0.249318	0.238161	0.243417	0.244885
44.6441		0.23196	0.243015	0.229559	0.238512	0.233567	0.242416	0.250562	0.240845	0.239767	0.233253	0.23989	0.23952	0.241294	0.238165	0.229294	0.243566	0.238976	0.239054	0.241292	0.236091	0.237499	0.240976	0.235024	0.241233	0.233576	0.238616	0.237323	0.238641	0.239665	0.239094	0.246035	0.230291	0.233142	0.238563	0.238969	0.239046	0.237255	0.234091	0.235311	0.244706	0.233915	0.237718	0.244572	0.24077	0.247509	0.236412	0.241668	0.243116
45.0463		0.230262	0.241237	0.22784	0.236769	0.231828	0.240621	0.248802	0.239056	0.238031	0.23158	0.238137	0.237783	0.239552	0.236407	0.227606	0.241815	0.237227	0.237316	0.23951	0.234415	0.235746	0.239201	0.233294	0.239475	0.231876	0.236879	0.235602	0.236913	0.237962	0.237335	0.244175	0.228622	0.23144	0.236823	0.237234	0.237327	0.235506	0.232384	0.233567	0.242942	0.232254	0.235998	0.242845	0.239034	0.24571	0.234675	0.239949	0.241368
45.4485		0.22857	0.239467	0.226129	0.235042	0.230108	0.23883	0.247048	0.237276	0.236303	0.229916	0.236396	0.236053	0.237815	0.234659	0.225941	0.240069	0.235491	0.235583	0.237731	0.232769	0.233994	0.237424	0.231555	0.237721	0.23019	0.235152	0.233885	0.235189	0.236265	0.235576	0.242306	0.226963	0.229745	0.235073	0.235505	0.235614	0.233769	0.230675	0.231835	0.241182	0.23062	0.234289	0.241118	0.237308	0.24392	0.232952	0.238253	0.239635
45.8507		0.226885	0.237707	0.224427	0.23333	0.228407	0.237049	0.245302	0.235507	0.234582	0.22826	0.234667	0.234333	0.236086	0.232922	0.224289	0.238331	0.233769	0.23386	0.235958	0.23114	0.232247	0.235652	0.229815	0.235973	0.228517	0.233434	0.232173	0.233471	0.234575	0.233819	0.240435	0.225313	0.228058	0.233321	0.233784	0.233907	0.232047	0.228967	0.230115	0.239428	0.229008	0.232593	0.239392	0.235593	0.24214	0.231244	0.236574	0.237914
46.2529		0.225208	0.235959	0.222733	0.231631	0.226724	0.235283	0.243567	0.23375	0.232871	0.226614	0.232952	0.232623	0.234367	0.231197	0.222643	0.236601	0.232063	0.23215	0.234194	0.229518	0.230507	0.233891	0.228084	0.234237	0.226854	0.231725	0.230468	0.231761	0.232896	0.232068	0.238574	0.223669	0.226381	0.23158	0.232074	0.232207	0.230341	0.227263	0.228408	0.237682	0.227408	0.230908	0.237671	0.233887	0.24037	0.229554	0.234906	0.236202
46.6551		0.223542	0.234225	0.221047	0.229942	0.225057	0.233539	0.241845	0.232007	0.231173	0.224977	0.231249	0.230925	0.23266	0.229485	0.220997	0.234883	0.230373	0.230459	0.232442	0.227895	0.228778	0.232146	0.226373	0.232516	0.2252	0.230025	0.228775	0.230061	0.231228	0.230329	0.236731	0.222034	0.224718	0.22986	0.23038	0.230516	0.228651	0.225568	0.226717	0.235948	0.225812	0.229236	0.235959	0.23219	0.238613	0.227882	0.233243	0.234497
47.0573		0.22189	0.232508	0.219372	0.228264	0.223405	0.23182	0.24014	0.23028	0.229489	0.223352	0.229559	0.22924	0.230967	0.227787	0.219346	0.233181	0.228699	0.228789	0.230706	0.226264	0.227064	0.230425	0.22469	0.230814	0.223554	0.228335	0.227096	0.228375	0.229573	0.228607	0.234916	0.220405	0.223069	0.228172	0.228704	0.228835	0.226979	0.223888	0.225042	0.234228	0.224216	0.227576	0.234259	0.230503	0.236868	0.226229	0.23158	0.232796
47.4595		0.220255	0.230808	0.217707	0.226597	0.221767	0.23013	0.238455	0.22857	0.227822	0.221739	0.227883	0.22757	0.229293	0.226105	0.217688	0.231497	0.227042	0.227142	0.22899	0.224619	0.225369	0.228731	0.223042	0.229134	0.221915	0.226656	0.225436	0.226705	0.227933	0.226904	0.233136	0.218785	0.221437	0.226522	0.22705	0.227169	0.225327	0.222226	0.223386	0.232526	0.222615	0.225928	0.232576	0.228824	0.235138	0.224596	0.229914	0.231101
47.8617		0.218638	0.229126	0.216054	0.22494	0.220142	0.228469	0.236792	0.226878	0.226173	0.220141	0.226219	0.225916	0.227639	0.224439	0.216024	0.229832	0.225402	0.22552	0.227296	0.222962	0.223696	0.227068	0.221431	0.227476	0.220286	0.224989	0.223796	0.225054	0.22631	0.225225	0.231395	0.217175	0.219821	0.224915	0.225417	0.225517	0.223693	0.220585	0.221748	0.230842	0.221008	0.224294	0.230912	0.227156	0.233423	0.222983	0.228245	0.22941
48.2638		0.217041	0.227461	0.214415	0.223296	0.218531	0.226837	0.235153	0.225204	0.224541	0.218559	0.224568	0.224278	0.226006	0.222789	0.214356	0.228187	0.223778	0.22392	0.225625	0.221293	0.222046	0.225438	0.219858	0.22584	0.218666	0.223335	0.222179	0.223426	0.224703	0.223571	0.229696	0.215576	0.218223	0.223351	0.223806	0.223883	0.222078	0.218969	0.220129	0.229179	0.219396	0.222673	0.229271	0.225498	0.231724	0.221388	0.226575	0.227726
48.666		0.215466	0.225813	0.21279	0.221665	0.216932	0.225232	0.233538	0.223547	0.222927	0.216993	0.222931	0.222656	0.224393	0.221157	0.212688	0.226562	0.222169	0.22234	0.223978	0.219618	0.22042	0.22384	0.218319	0.224225	0.217058	0.221695	0.220584	0.22182	0.223112	0.22194	0.228034	0.21399	0.216641	0.221824	0.222215	0.222265	0.220478	0.217377	0.21853	0.227535	0.217783	0.221066	0.227653	0.223852	0.230039	0.21981	0.224906	0.226048
49.0682		0.21391	0.22418	0.21118	0.220049	0.215347	0.22365	0.231945	0.221908	0.22133	0.215444	0.221306	0.221049	0.2228	0.219542	0.211025	0.224955	0.220574	0.220777	0.222353	0.217945	0.218815	0.222269	0.216808	0.222628	0.215463	0.22007	0.219009	0.220238	0.221535	0.220332	0.226405	0.21242	0.215075	0.220327	0.220643	0.220663	0.218891	0.215807	0.216948	0.225911	0.216174	0.21947	0.226058	0.222217	0.228369	0.218249	0.223244	0.22438
49.4704		0.212373	0.222562	0.209586	0.218448	0.213775	0.222086	0.230374	0.220286	0.21975	0.21391	0.219692	0.219454	0.221224	0.217943	0.209376	0.223365	0.218991	0.219226	0.220749	0.216282	0.21723	0.220722	0.215315	0.221045	0.213883	0.21846	0.217452	0.218678	0.219971	0.218743	0.224799	0.210865	0.213521	0.21885	0.219085	0.219076	0.217316	0.214256	0.215383	0.224305	0.214577	0.217887	0.224482	0.220596	0.226711	0.216703	0.221595	0.222722
49.8726		0.210853	0.220956	0.208008	0.216865	0.212217	0.220535	0.228821	0.218679	0.218185	0.212392	0.218091	0.217871	0.219662	0.21636	0.207745	0.221789	0.217417	0.217681	0.219164	0.214638	0.215661	0.219191	0.213831	0.219471	0.21232	0.216865	0.215909	0.217139	0.218416	0.217168	0.223206	0.209327	0.211981	0.21738	0.217537	0.2175	0.215748	0.212719	0.213833	0.222714	0.212998	0.216315	0.222924	0.218988	0.225064	0.21517	0.219968	0.221076
50.2748		0.209348	0.219362	0.206444	0.2153	0.210672	0.218992	0.227283	0.217087	0.216634	0.210886	0.216499	0.216296	0.218112	0.214792	0.20614	0.220226	0.215851	0.216137	0.217597	0.213025	0.214105	0.217669	0.212344	0.217903	0.210776	0.215285	0.214379	0.215616	0.216868	0.215605	0.221615	0.207804	0.210453	0.215903	0.215995	0.215933	0.214187	0.211191	0.212295	0.221138	0.211447	0.214755	0.221379	0.217395	0.223426	0.213648	0.21837	0.219446
50.677		0.207856	0.217779	0.204894	0.213752	0.209142	0.217451	0.225756	0.215507	0.215096	0.209393	0.214918	0.214729	0.21657	0.213237	0.204567	0.218673	0.214291	0.214589	0.216045	0.211453	0.212558	0.216148	0.210845	0.216337	0.209251	0.213719	0.212856	0.214108	0.215323	0.214049	0.220014	0.206296	0.208937	0.214406	0.214454	0.214372	0.212629	0.209667	0.21077	0.219571	0.209931	0.213206	0.219843	0.215818	0.221796	0.212137	0.216809	0.217834
51.0792		0.206373	0.216206	0.203357	0.212223	0.207624	0.215907	0.224238	0.213939	0.213569	0.20791	0.213345	0.213169	0.215035	0.211695	0.203031	0.217129	0.212736	0.213034	0.214508	0.209932	0.211017	0.214621	0.209323	0.214769	0.207746	0.212166	0.21134	0.212609	0.213781	0.212495	0.218393	0.2048	0.207433	0.212877	0.21291	0.212814	0.211075	0.208139	0.209257	0.218011	0.20846	0.211667	0.218311	0.214256	0.220172	0.210636	0.215293	0.216245
51.4814		0.204899	0.214642	0.20183	0.210711	0.20612	0.214355	0.222724	0.212381	0.212051	0.206437	0.21178	0.211614	0.213504	0.210161	0.201537	0.215592	0.211187	0.211467	0.212982	0.208474	0.209481	0.21308	0.207769	0.213197	0.206261	0.210627	0.209826	0.211117	0.212238	0.21094	0.216742	0.203315	0.205941	0.211305	0.211358	0.211259	0.209524	0.206605	0.207755	0.216452	0.207042	0.210139	0.21678	0.212712	0.218552	0.209143	0.213829	0.214681
51.8836		0.20343	0.213085	0.200311	0.209218	0.204629	0.212789	0.221211	0.21083	0.210538	0.204973	0.210222	0.210064	0.211977	0.208634	0.200088	0.21406	0.209642	0.209886	0.211468	0.207086	0.207945	0.211521	0.206175	0.211619	0.204795	0.209099	0.208313	0.209626	0.210693	0.209381	0.215053	0.201837	0.20446	0.209678	0.209795	0.209703	0.207977	0.20506	0.206264	0.214891	0.205684	0.208622	0.215247	0.211185	0.216935	0.207657	0.212422	0.213148
52.2858		0.201964	0.211532	0.198798	0.207743	0.203149	0.211204	0.219698	0.209285	0.209029	0.203516	0.208673	0.20852	0.210453	0.20711	0.198688	0.212533	0.208102	0.208288	0.209961	0.205775	0.20641	0.209937	0.204535	0.210035	0.203348	0.207583	0.206798	0.208133	0.209142	0.207813	0.213318	0.200364	0.202988	0.207991	0.208216	0.208145	0.206435	0.2035	0.204784	0.213322	0.20439	0.207114	0.213706	0.209676	0.215319	0.206178	0.211075	0.211649
52.688		0.200498	0.20998	0.197288	0.206284	0.20168	0.209596	0.21818	0.207742	0.20752	0.202065	0.207131	0.206979	0.208933	0.205587	0.197337	0.211008	0.206567	0.206672	0.208461	0.204545	0.204872	0.208326	0.202844	0.208445	0.201916	0.206076	0.205279	0.206636	0.207584	0.206234	0.211532	0.198895	0.201522	0.206237	0.206619	0.206583	0.204898	0.201924	0.203315	0.211742	0.203164	0.205616	0.212157	0.208184	0.213702	0.204706	0.209788	0.210185
53.0902		0.199028	0.208427	0.195778	0.204843	0.20022	0.20796	0.216656	0.206199	0.206009	0.200619	0.205595	0.205443	0.207415	0.204062	0.196032	0.209485	0.205036	0.205035	0.206965	0.203393	0.203332	0.206686	0.201099	0.206848	0.200499	0.204578	0.203754	0.205133	0.206016	0.204642	0.209694	0.197426	0.200059	0.204415	0.205003	0.205014	0.203368	0.200329	0.201856	0.210148	0.202002	0.204126	0.210595	0.206708	0.212083	0.203238	0.208559	0.208757
53.4924		0.197552	0.206868	0.194267	0.203416	0.198769	0.206295	0.215124	0.204651	0.204493	0.199176	0.204065	0.203909	0.205899	0.202533	0.194768	0.207961	0.20351	0.203379	0.20547	0.202316	0.201788	0.205019	0.199303	0.205246	0.199093	0.203086	0.202222	0.203621	0.204437	0.203037	0.207806	0.195956	0.198596	0.202529	0.203369	0.203437	0.201844	0.198716	0.200404	0.208539	0.200901	0.202641	0.20902	0.205246	0.21046	0.201775	0.207379	0.207363
53.8946		0.196069	0.205302	0.192753	0.202003	0.197326	0.204602	0.213586	0.203097	0.202971	0.197733	0.202539	0.202379	0.204386	0.201001	0.193537	0.206436	0.201988	0.201705	0.203974	0.201298	0.20024	0.203329	0.197462	0.203639	0.197696	0.201598	0.200684	0.202102	0.202848	0.201419	0.205872	0.194485	0.197128	0.200591	0.20172	0.201851	0.200327	0.197087	0.198957	0.206917	0.199847	0.201159	0.207432	0.203796	0.208832	0.200315	0.206238	0.205998
54.2968		0.194578	0.20373	0.191236	0.2006	0.195889	0.202887	0.212044	0.201534	0.201444	0.196289	0.201018	0.200852	0.202876	0.199468	0.192327	0.204911	0.200468	0.200017	0.202476	0.200324	0.198689	0.201621	0.19559	0.202032	0.196305	0.200112	0.199141	0.200577	0.20125	0.199792	0.203908	0.193014	0.195656	0.198617	0.200061	0.200256	0.198818	0.195446	0.197513	0.205287	0.198824	0.199678	0.205834	0.202354	0.2072	0.198858	0.20512	0.204655
54.699		0.193081	0.202152	0.189718	0.199205	0.194457	0.201159	0.210504	0.199964	0.199913	0.194843	0.1995	0.199331	0.201371	0.197935	0.191124	0.203387	0.198951	0.198324	0.200974	0.199367	0.197139	0.199907	0.193706	0.200429	0.194916	0.198626	0.197597	0.199049	0.199649	0.198162	0.201931	0.191544	0.194177	0.196634	0.198401	0.198657	0.197316	0.193803	0.196069	0.203656	0.19781	0.198195	0.204232	0.200918	0.205567	0.197402	0.204006	0.203325
55.1012		0.191583	0.200575	0.188201	0.197812	0.193032	0.199435	0.208972	0.198388	0.198382	0.193396	0.197986	0.197818	0.199874	0.196406	0.189911	0.201867	0.197439	0.196636	0.199469	0.198399	0.195593	0.1982	0.191836	0.198836	0.193527	0.19714	0.196058	0.197522	0.198051	0.196537	0.199968	0.190078	0.192695	0.194674	0.19675	0.197058	0.195825	0.192169	0.194627	0.202033	0.196782	0.19671	0.202634	0.199483	0.203937	0.195948	0.202876	0.201996
55.5034		0.190088	0.199004	0.186689	0.19642	0.191614	0.19773	0.207459	0.196813	0.196856	0.191948	0.196479	0.196317	0.198389	0.194888	0.18867	0.200356	0.195933	0.194967	0.197962	0.197389	0.194057	0.196516	0.190007	0.197262	0.192137	0.195654	0.194531	0.196002	0.196464	0.194928	0.198048	0.188619	0.191212	0.192773	0.195121	0.195469	0.194345	0.190555	0.193186	0.200429	0.195711	0.195222	0.20105	0.198047	0.202317	0.194496	0.201707	0.200657
55.9056		0.188605	0.19745	0.185188	0.195022	0.190202	0.196067	0.205974	0.195246	0.195342	0.190504	0.194981	0.194832	0.196922	0.193383	0.187387	0.198859	0.194439	0.193333	0.196456	0.196305	0.19254	0.194872	0.18825	0.195714	0.190744	0.19417	0.193024	0.194495	0.194898	0.193344	0.196203	0.187172	0.189734	0.190966	0.193527	0.193897	0.192881	0.188976	0.19175	0.198853	0.194575	0.193734	0.199489	0.196608	0.200715	0.193047	0.200481	0.199298
56.3078		0.18714	0.195921	0.183704	0.193618	0.188796	0.194463	0.204525	0.193698	0.193844	0.189065	0.193498	0.193365	0.195478	0.191898	0.186046	0.197382	0.192961	0.191749	0.194955	0.195123	0.191047	0.193286	0.186592	0.194201	0.189347	0.192692	0.191543	0.193005	0.193361	0.191796	0.194461	0.18574	0.188267	0.189286	0.191978	0.192354	0.191435	0.187443	0.190322	0.197314	0.193351	0.192247	0.197962	0.195165	0.199141	0.191605	0.199182	0.197909
56.71		0.185701	0.194424	0.182242	0.192205	0.187395	0.192933	0.203119	0.192176	0.192367	0.187638	0.192033	0.19192	0.194061	0.190434	0.18464	0.19593	0.191504	0.190227	0.193463	0.193825	0.189585	0.19177	0.185054	0.192729	0.187948	0.191221	0.190093	0.191537	0.191859	0.190292	0.192845	0.184326	0.186816	0.187754	0.190484	0.190848	0.19001	0.185967	0.188907	0.195818	0.192028	0.190767	0.196477	0.193718	0.197603	0.19017	0.197799	0.196485
57.1122		0.184293	0.192965	0.180805	0.190784	0.185998	0.191488	0.201759	0.190688	0.190916	0.186228	0.19059	0.190497	0.192674	0.188994	0.183166	0.194507	0.190074	0.188776	0.191986	0.192406	0.188158	0.190332	0.183647	0.191299	0.186548	0.189762	0.188678	0.190094	0.190395	0.188836	0.191366	0.182931	0.185385	0.18638	0.189049	0.189383	0.188609	0.184552	0.187509	0.194369	0.190604	0.189299	0.195037	0.192269	0.196106	0.188747	0.196332	0.195024
57.5144		0.182918	0.191548	0.179397	0.189356	0.184602	0.190129	0.200445	0.189239	0.189491	0.184837	0.18917	0.189095	0.191317	0.187578	0.181629	0.193113	0.188671	0.187397	0.190528	0.190873	0.186767	0.188974	0.182369	0.189913	0.18515	0.188316	0.187298	0.188677	0.188971	0.187429	0.190024	0.181557	0.183977	0.185162	0.187673	0.187961	0.187232	0.183196	0.18613	0.192964	0.189086	0.187846	0.193643	0.190817	0.194655	0.187338	0.194787	0.193532
57.9166		0.181575	0.190171	0.178016	0.187924	0.183205	0.188849	0.19917	0.187828	0.18809	0.183468	0.187773	0.187714	0.189989	0.186186	0.180038	0.191748	0.187298	0.186084	0.189093	0.189244	0.18541	0.18769	0.181208	0.188566	0.183755	0.186884	0.185949	0.187284	0.187584	0.186068	0.188804	0.180202	0.182594	0.18408	0.186351	0.186582	0.185878	0.181895	0.184771	0.191601	0.187491	0.186413	0.192292	0.189365	0.193248	0.185944	0.193178	0.192013
58.3188		0.180261	0.188831	0.176662	0.186492	0.181806	0.187636	0.19793	0.186453	0.18671	0.182122	0.186396	0.186349	0.188686	0.184814	0.178411	0.19041	0.185951	0.184829	0.187683	0.187549	0.184083	0.186468	0.180141	0.187251	0.182366	0.185466	0.184626	0.185915	0.186228	0.184748	0.187683	0.178867	0.181235	0.183108	0.185073	0.185241	0.184546	0.180637	0.183432	0.190271	0.185843	0.185002	0.190978	0.187915	0.191882	0.184567	0.191527	0.190479
58.721		0.178972	0.187522	0.17533	0.185064	0.180406	0.18647	0.196714	0.185109	0.185348	0.180798	0.185035	0.184998	0.187402	0.183461	0.176766	0.189094	0.184626	0.183617	0.1863	0.185819	0.18278	0.185292	0.179142	0.18596	0.180988	0.184061	0.183324	0.184565	0.184896	0.18346	0.186629	0.17755	0.179899	0.182211	0.183829	0.18393	0.183234	0.17941	0.182111	0.188967	0.184168	0.183612	0.189692	0.186468	0.190547	0.183207	0.189856	0.188939
59.1232		0.177701	0.186238	0.174016	0.183643	0.179007	0.185333	0.195512	0.183788	0.183999	0.179491	0.183685	0.183658	0.186131	0.182125	0.175121	0.187794	0.183318	0.182431	0.184941	0.184088	0.181494	0.184143	0.178178	0.184684	0.179622	0.182668	0.182036	0.183231	0.183584	0.182194	0.185609	0.176248	0.178582	0.181351	0.182605	0.182643	0.181937	0.178202	0.180806	0.18768	0.18249	0.182242	0.188427	0.185027	0.189236	0.181864	0.188189	0.187407
59.5254		0.176442	0.184971	0.172715	0.182235	0.177613	0.184203	0.194318	0.182482	0.182659	0.1782	0.182342	0.182325	0.184865	0.180803	0.173495	0.186505	0.182018	0.181256	0.183605	0.182382	0.180217	0.183005	0.177222	0.183414	0.178272	0.181285	0.180756	0.181909	0.182283	0.180941	0.184592	0.174962	0.177281	0.180496	0.181389	0.181372	0.180652	0.176999	0.179513	0.186403	0.180833	0.180889	0.187172	0.183594	0.187936	0.180535	0.186546	0.18589
59.9276		0.175192	0.183715	0.171422	0.180841	0.176231	0.183064	0.193122	0.181185	0.181326	0.176919	0.181001	0.180998	0.183599	0.179493	0.171901	0.185222	0.180721	0.180077	0.182285	0.180725	0.178942	0.181861	0.176248	0.182141	0.176939	0.179912	0.179476	0.180596	0.180988	0.179691	0.183552	0.173689	0.175992	0.179618	0.180168	0.18011	0.179376	0.175792	0.17823	0.185129	0.179213	0.179547	0.185921	0.182172	0.186639	0.179219	0.184943	0.184397
60.3298		0.173947	0.182463	0.170133	0.179465	0.174864	0.181903	0.191919	0.179891	0.179999	0.175646	0.17966	0.179676	0.182329	0.178193	0.170349	0.183941	0.17942	0.178884	0.180979	0.179129	0.177664	0.180701	0.175239	0.18086	0.175623	0.178549	0.178193	0.179289	0.179695	0.178437	0.182472	0.172425	0.174711	0.178694	0.178935	0.178851	0.178107	0.174573	0.176955	0.183853	0.177641	0.178213	0.184668	0.180761	0.185335	0.177912	0.183386	0.182932
60.732		0.172703	0.181211	0.168844	0.178105	0.173517	0.180711	0.190704	0.178596	0.178676	0.174376	0.178318	0.178356	0.181051	0.1769	0.168842	0.18266	0.17811	0.17767	0.179679	0.177598	0.176379	0.179515	0.174183	0.179566	0.174324	0.177195	0.176902	0.177983	0.178399	0.177173	0.181343	0.171168	0.173434	0.177714	0.177685	0.17759	0.176839	0.173338	0.175685	0.182572	0.176123	0.176883	0.183406	0.179362	0.184019	0.176609	0.181879	0.181496
61.1342		0.171459	0.179956	0.167551	0.17676	0.172193	0.179482	0.189476	0.177296	0.177356	0.173108	0.176975	0.177039	0.179765	0.175613	0.167379	0.181377	0.17679	0.176431	0.178381	0.176129	0.175085	0.178301	0.173074	0.17826	0.173038	0.175849	0.175599	0.176676	0.177098	0.175896	0.180161	0.169912	0.172156	0.176673	0.176413	0.176324	0.175571	0.172084	0.174418	0.181286	0.174658	0.175553	0.182133	0.177976	0.182684	0.175305	0.180416	0.180087
61.5364		0.170211	0.178696	0.166254	0.175425	0.170892	0.178217	0.188232	0.175989	0.17604	0.171837	0.175632	0.175723	0.178471	0.174328	0.165954	0.180088	0.175457	0.175169	0.177082	0.174712	0.173782	0.177058	0.171913	0.176941	0.17176	0.174511	0.174283	0.175365	0.175789	0.174604	0.17893	0.168652	0.170875	0.175575	0.17512	0.175048	0.174299	0.170812	0.173152	0.179993	0.173242	0.174222	0.180848	0.1766	0.181331	0.173998	0.178987	0.1787
61.9386		0.168959	0.177431	0.16495	0.174097	0.16961	0.176917	0.186973	0.174674	0.174725	0.170563	0.174289	0.174409	0.177171	0.173041	0.164557	0.178795	0.174114	0.173886	0.175779	0.173337	0.172469	0.175788	0.170706	0.175612	0.170486	0.173178	0.172955	0.174048	0.174472	0.173297	0.17766	0.167385	0.169589	0.174429	0.173808	0.173762	0.173022	0.169524	0.171884	0.178693	0.171866	0.172891	0.179549	0.175232	0.179959	0.172683	0.17758	0.177329
62.3408		0.1677	0.17616	0.163639	0.172769	0.168342	0.175588	0.185697	0.173348	0.173411	0.169284	0.172948	0.173096	0.175868	0.171749	0.163179	0.177495	0.172763	0.172586	0.174471	0.17199	0.17115	0.174496	0.169462	0.174277	0.169209	0.171848	0.171617	0.172726	0.173146	0.17198	0.176359	0.166106	0.168295	0.173247	0.172482	0.172463	0.171738	0.168224	0.170612	0.177386	0.170521	0.171562	0.178238	0.17387	0.178571	0.171358	0.176184	0.175966
62.743		0.166435	0.174882	0.162323	0.171438	0.167082	0.174237	0.184408	0.172012	0.172095	0.167999	0.171608	0.171784	0.174566	0.170448	0.161808	0.176187	0.171411	0.171275	0.173158	0.170658	0.169826	0.173189	0.168194	0.172942	0.167927	0.170519	0.170274	0.171399	0.171813	0.170655	0.175041	0.164814	0.166996	0.172044	0.171147	0.171153	0.170448	0.166916	0.169336	0.176072	0.169196	0.170235	0.176917	0.172509	0.177172	0.170024	0.174787	0.174605
63.1452		0.165164	0.173598	0.161004	0.1701	0.165822	0.172872	0.183107	0.170668	0.170777	0.166708	0.170268	0.170472	0.173269	0.169137	0.160435	0.17487	0.17006	0.169958	0.171842	0.169331	0.1685	0.171873	0.166913	0.171609	0.166636	0.169188	0.16893	0.17007	0.170473	0.169328	0.173719	0.163507	0.165693	0.170834	0.16981	0.169834	0.169152	0.165606	0.168054	0.174751	0.16788	0.168912	0.175588	0.171149	0.175765	0.168684	0.173384	0.17324
63.5474		0.163887	0.172308	0.159684	0.168756	0.164554	0.171503	0.181797	0.169318	0.169456	0.165411	0.168929	0.16916	0.171979	0.167817	0.159054	0.173545	0.168716	0.168639	0.170526	0.168002	0.167177	0.170557	0.165631	0.170282	0.165338	0.167854	0.16759	0.168739	0.169128	0.168001	0.172403	0.162189	0.164389	0.169629	0.168477	0.16851	0.167853	0.164298	0.166769	0.173423	0.166565	0.167594	0.174256	0.169788	0.174357	0.167342	0.171972	0.171869
63.9496		0.162608	0.171013	0.158366	0.167407	0.163276	0.170138	0.180483	0.167966	0.168133	0.16411	0.16759	0.167849	0.1707	0.166488	0.157661	0.172212	0.167381	0.167321	0.169211	0.166667	0.165857	0.169247	0.164357	0.168963	0.164036	0.166519	0.166258	0.167412	0.167781	0.166679	0.171102	0.160863	0.163089	0.168438	0.167153	0.167184	0.166554	0.162998	0.165483	0.17209	0.165245	0.166281	0.172923	0.168426	0.172953	0.166003	0.170555	0.170494
64.3518		0.161329	0.169714	0.157053	0.166057	0.161982	0.168785	0.179167	0.166615	0.16681	0.162804	0.166252	0.166537	0.169432	0.165153	0.156258	0.170874	0.166057	0.166007	0.1679	0.165325	0.164545	0.167946	0.163097	0.167653	0.162737	0.165185	0.164935	0.166089	0.166434	0.165362	0.169824	0.159536	0.161797	0.167267	0.165842	0.16586	0.165256	0.161709	0.1642	0.170755	0.163917	0.16497	0.171593	0.167066	0.171558	0.164671	0.169137	0.169116
64.754		0.160052	0.168411	0.155749	0.164713	0.160675	0.167449	0.177855	0.165272	0.165486	0.161497	0.164913	0.165226	0.168175	0.163817	0.154847	0.169534	0.164744	0.164696	0.166593	0.16398	0.16324	0.166656	0.161854	0.166351	0.161445	0.163854	0.163622	0.164773	0.165089	0.164052	0.168569	0.158212	0.160514	0.166116	0.164545	0.164539	0.163963	0.160432	0.162923	0.169418	0.16258	0.163662	0.170268	0.16571	0.170173	0.163352	0.167726	0.167743
65.1562		0.158779	0.167108	0.154453	0.163378	0.159358	0.166133	0.176551	0.16394	0.164164	0.160189	0.163574	0.163916	0.166927	0.162484	0.153433	0.168198	0.163438	0.16339	0.165292	0.162634	0.161944	0.165376	0.160624	0.165056	0.160166	0.162529	0.162314	0.163464	0.163747	0.162746	0.167334	0.156898	0.159244	0.164981	0.163264	0.163223	0.162673	0.159166	0.161654	0.168084	0.161235	0.162355	0.168949	0.16436	0.168802	0.162046	0.16633	0.166377
65.5584		0.157511	0.165805	0.153165	0.162056	0.158035	0.164837	0.175256	0.162622	0.162843	0.158882	0.162235	0.162607	0.165684	0.161157	0.152023	0.16687	0.162139	0.162085	0.163996	0.161293	0.160656	0.164101	0.159406	0.163768	0.158902	0.16121	0.161011	0.162161	0.162411	0.161444	0.166111	0.1556	0.157985	0.163857	0.161995	0.161909	0.161388	0.157911	0.160395	0.166755	0.159888	0.16105	0.167637	0.163019	0.167442	0.160753	0.164953	0.165024
65.9606		0.156249	0.164507	0.151884	0.16075	0.156715	0.163557	0.173972	0.161318	0.161522	0.157578	0.160897	0.161301	0.164443	0.159837	0.150624	0.165555	0.160845	0.160782	0.162705	0.159962	0.159375	0.162826	0.158193	0.162486	0.157657	0.159897	0.159707	0.160864	0.161081	0.160145	0.164889	0.15432	0.156736	0.162735	0.160735	0.160594	0.160105	0.15666	0.159143	0.165433	0.158542	0.159747	0.166331	0.161687	0.166095	0.159471	0.163598	0.163686
66.3628		0.154994	0.163214	0.150608	0.159459	0.155402	0.162288	0.172697	0.160026	0.160201	0.15628	0.159561	0.16	0.163201	0.158525	0.149241	0.164255	0.159553	0.159479	0.161417	0.158647	0.158097	0.161547	0.156982	0.161211	0.156427	0.15859	0.158401	0.159569	0.159759	0.158848	0.163657	0.153061	0.155495	0.161605	0.15948	0.159278	0.158821	0.155411	0.157897	0.164118	0.157206	0.158449	0.165031	0.160363	0.164759	0.158197	0.162263	0.162362
66.765		0.153745	0.161929	0.149333	0.15818	0.154102	0.161024	0.17143	0.158742	0.158878	0.15499	0.158226	0.158704	0.161957	0.157219	0.147881	0.162971	0.158264	0.158176	0.160132	0.157352	0.156823	0.160259	0.155768	0.159943	0.155211	0.157284	0.157091	0.158275	0.158447	0.157554	0.162405	0.151821	0.15426	0.160458	0.158224	0.157958	0.157534	0.154158	0.156654	0.162808	0.155884	0.157159	0.163733	0.159047	0.163432	0.156928	0.160945	0.161051
67.1672		0.152502	0.160654	0.148059	0.156912	0.152819	0.159756	0.170167	0.157464	0.157554	0.15371	0.156893	0.157415	0.160712	0.155916	0.146545	0.161701	0.156979	0.156871	0.158848	0.156079	0.155549	0.158962	0.154548	0.158682	0.154005	0.155976	0.155776	0.15698	0.157144	0.156264	0.161124	0.150597	0.153029	0.159287	0.156964	0.156634	0.156241	0.1529	0.155411	0.161501	0.154581	0.155879	0.162436	0.157736	0.162115	0.155659	0.159639	0.159752
67.5694		0.151265	0.159389	0.146785	0.155651	0.151552	0.158478	0.168904	0.156185	0.15623	0.152443	0.155566	0.156134	0.159467	0.154614	0.145237	0.160441	0.155698	0.155567	0.157565	0.154829	0.154275	0.157657	0.153321	0.157428	0.152804	0.154665	0.154458	0.155683	0.15585	0.15498	0.159812	0.149384	0.151801	0.158086	0.155695	0.155309	0.15494	0.151635	0.154168	0.160194	0.153302	0.154609	0.161139	0.156428	0.160807	0.15439	0.158343	0.158462
67.9716		0.150031	0.158133	0.145514	0.154394	0.150298	0.157186	0.167638	0.154903	0.154907	0.15119	0.154245	0.15486	0.158225	0.153311	0.143955	0.159186	0.154423	0.154263	0.156282	0.153601	0.153	0.156345	0.152084	0.15618	0.151606	0.153348	0.153138	0.154385	0.154566	0.153702	0.158471	0.148176	0.150578	0.156854	0.154415	0.153986	0.153632	0.150365	0.152922	0.158884	0.152048	0.153348	0.15984	0.155119	0.159506	0.153121	0.157053	0.157181
68.3738		0.148799	0.156885	0.144248	0.153142	0.149054	0.155875	0.166366	0.153616	0.153589	0.149952	0.152931	0.153592	0.156988	0.152007	0.1427	0.157932	0.153154	0.152963	0.154996	0.152395	0.151724	0.15503	0.150834	0.154938	0.150408	0.152028	0.151817	0.153085	0.153289	0.15243	0.157105	0.146966	0.14936	0.155589	0.153126	0.152668	0.152318	0.149091	0.151675	0.157566	0.150817	0.152092	0.158537	0.15381	0.158211	0.151853	0.155772	0.155908
68.776		0.147565	0.155642	0.142991	0.151896	0.147815	0.154544	0.165087	0.152323	0.152278	0.14873	0.151627	0.152327	0.155757	0.150702	0.141471	0.156675	0.151891	0.151664	0.153708	0.151209	0.150444	0.153713	0.149567	0.153699	0.149206	0.150707	0.150498	0.151787	0.152019	0.151162	0.155721	0.145748	0.148147	0.154291	0.151829	0.151358	0.151001	0.147817	0.150425	0.15624	0.149608	0.150838	0.157229	0.152501	0.156922	0.150587	0.154502	0.154644
69.1782		0.146326	0.1544	0.141746	0.150656	0.146579	0.153193	0.163799	0.151027	0.150975	0.147519	0.150332	0.151062	0.154532	0.149399	0.140266	0.155411	0.150632	0.150367	0.152417	0.15004	0.149161	0.152395	0.148279	0.152461	0.148002	0.149388	0.149183	0.150492	0.150753	0.149896	0.154325	0.144517	0.14694	0.152962	0.150526	0.150057	0.149687	0.146541	0.149173	0.154903	0.148418	0.149581	0.155917	0.151195	0.155636	0.149326	0.153248	0.153389
69.5804		0.14508	0.153156	0.140516	0.149425	0.145343	0.151825	0.162502	0.149728	0.149681	0.146319	0.149047	0.149792	0.153307	0.148101	0.139084	0.154139	0.149378	0.149069	0.151121	0.148886	0.147871	0.151074	0.146965	0.151224	0.146795	0.148074	0.147873	0.149202	0.14949	0.148628	0.152922	0.14327	0.145739	0.151603	0.14922	0.148764	0.148379	0.145265	0.147918	0.153555	0.147245	0.148317	0.1546	0.149896	0.154351	0.148071	0.152018	0.152144
69.9826		0.143824	0.151907	0.139301	0.148205	0.144107	0.150445	0.161196	0.148431	0.148393	0.145124	0.147771	0.148516	0.152079	0.146812	0.137925	0.152859	0.148127	0.147766	0.149822	0.147747	0.146572	0.149749	0.145623	0.149985	0.145588	0.146768	0.146573	0.147918	0.148227	0.147355	0.151514	0.142007	0.144542	0.150214	0.147913	0.147478	0.147081	0.143986	0.14666	0.152199	0.146089	0.147045	0.153277	0.14861	0.153066	0.146824	0.150816	0.150909
70.3848		0.14256	0.150652	0.138097	0.146997	0.142874	0.149058	0.159882	0.147135	0.14711	0.14393	0.146503	0.14723	0.15084	0.145534	0.136787	0.15157	0.146877	0.146455	0.148521	0.146622	0.145263	0.148415	0.144251	0.148743	0.144386	0.14547	0.145282	0.146641	0.146961	0.146075	0.150102	0.140728	0.143347	0.148794	0.146606	0.146195	0.145793	0.142702	0.145398	0.150835	0.14495	0.145767	0.151951	0.14734	0.151781	0.145585	0.149644	0.149683
70.787		0.141286	0.14939	0.136901	0.145798	0.141645	0.147669	0.158561	0.145842	0.145829	0.142735	0.145243	0.145935	0.149586	0.144267	0.135669	0.150274	0.145627	0.145133	0.147221	0.145507	0.143943	0.147072	0.142853	0.1475	0.143192	0.14418	0.144002	0.145371	0.14569	0.144785	0.148686	0.139437	0.142153	0.147346	0.1453	0.14491	0.144514	0.14141	0.144133	0.149468	0.143829	0.144487	0.15062	0.14609	0.150496	0.144355	0.148502	0.148464
71.1892		0.140007	0.148121	0.135707	0.144608	0.140423	0.146284	0.157233	0.144552	0.144549	0.141533	0.14399	0.144632	0.148313	0.14301	0.134567	0.148969	0.144375	0.143798	0.145923	0.1444	0.142613	0.145719	0.141432	0.146255	0.142011	0.142895	0.142733	0.144104	0.144411	0.143486	0.147267	0.138136	0.140957	0.145872	0.143991	0.14362	0.14324	0.14011	0.142868	0.148102	0.142728	0.143211	0.149287	0.144858	0.14921	0.143134	0.147384	0.147253
71.5914		0.138723	0.146846	0.134509	0.143422	0.139209	0.144906	0.155899	0.143261	0.143271	0.140323	0.142743	0.143324	0.14702	0.141759	0.133477	0.147656	0.143117	0.14245	0.144631	0.143299	0.141277	0.14436	0.139997	0.145007	0.140844	0.14161	0.141474	0.142838	0.143121	0.142177	0.145844	0.13683	0.13976	0.144376	0.142677	0.142322	0.141968	0.138804	0.141604	0.146742	0.141646	0.141946	0.147952	0.14364	0.147924	0.141921	0.146282	0.146047
71.9936		0.137435	0.145567	0.133304	0.142236	0.138004	0.143537	0.15456	0.141969	0.141995	0.139104	0.141504	0.142015	0.145709	0.140511	0.132393	0.146335	0.14185	0.141092	0.143346	0.142198	0.139939	0.142999	0.138554	0.143757	0.139689	0.14032	0.140221	0.141568	0.141819	0.140858	0.144418	0.135521	0.13856	0.142865	0.141355	0.141013	0.140693	0.137496	0.140346	0.145392	0.140579	0.140697	0.146617	0.14243	0.146632	0.140713	0.145183	0.144847
72.3958		0.136144	0.144286	0.13209	0.141046	0.136804	0.142174	0.153213	0.140674	0.140724	0.137874	0.140271	0.140707	0.144382	0.139262	0.131308	0.145008	0.14057	0.139726	0.142068	0.14109	0.138604	0.141641	0.137111	0.142502	0.138541	0.139022	0.13897	0.14029	0.140503	0.139532	0.142992	0.134214	0.137357	0.141352	0.14002	0.139693	0.139414	0.136192	0.139093	0.144058	0.139519	0.139468	0.145284	0.141217	0.145332	0.139507	0.144074	0.143649
72.798		0.13485	0.143005	0.130867	0.139848	0.135607	0.140814	0.151857	0.139374	0.13946	0.136634	0.139045	0.139403	0.143043	0.138011	0.130213	0.143679	0.139274	0.138355	0.140794	0.139968	0.13728	0.140293	0.135677	0.141241	0.137392	0.137714	0.137718	0.139	0.139174	0.138201	0.14157	0.132912	0.136152	0.139848	0.138671	0.138363	0.138133	0.134898	0.137847	0.142742	0.138457	0.138258	0.143955	0.139993	0.144018	0.138299	0.14294	0.142452
73.2002		0.133553	0.141726	0.129641	0.138639	0.134411	0.139453	0.15049	0.13807	0.138206	0.135386	0.137825	0.138106	0.141695	0.136758	0.129099	0.142353	0.137963	0.136983	0.139521	0.138824	0.13597	0.13896	0.13426	0.139975	0.136229	0.136399	0.13646	0.1377	0.137833	0.136868	0.140157	0.131618	0.134946	0.138366	0.137309	0.137027	0.136854	0.133621	0.136608	0.141448	0.13738	0.137062	0.14263	0.138751	0.142683	0.137082	0.141771	0.141251
73.6024		0.132252	0.140451	0.128417	0.137418	0.133213	0.13809	0.149111	0.136763	0.136965	0.134134	0.136609	0.136818	0.14034	0.135503	0.12796	0.141035	0.136637	0.135615	0.138244	0.137653	0.134677	0.137646	0.132867	0.138705	0.135045	0.135081	0.135193	0.136391	0.136486	0.135538	0.138761	0.130339	0.133741	0.136918	0.135935	0.135689	0.135583	0.132367	0.135374	0.140175	0.136276	0.135876	0.141314	0.137487	0.141325	0.135853	0.140557	0.140044
74.0046		0.130949	0.139183	0.127202	0.136186	0.132013	0.136725	0.147719	0.135456	0.135736	0.13288	0.135395	0.135545	0.138982	0.134249	0.126792	0.139732	0.135304	0.134255	0.136961	0.136449	0.133404	0.13635	0.131506	0.137434	0.133836	0.133768	0.133917	0.13508	0.13514	0.134217	0.13739	0.129081	0.13254	0.135517	0.134557	0.134358	0.134329	0.13114	0.134144	0.13892	0.135135	0.134691	0.140008	0.136201	0.139945	0.134609	0.139295	0.138827
74.4068		0.129644	0.137924	0.126001	0.134945	0.130812	0.135363	0.146317	0.134154	0.134522	0.13163	0.134182	0.134291	0.137623	0.132998	0.125593	0.138448	0.13397	0.13291	0.135672	0.135212	0.132149	0.135072	0.130185	0.136169	0.132601	0.132468	0.132632	0.133775	0.133803	0.132913	0.136051	0.127849	0.131346	0.134168	0.133183	0.13304	0.133098	0.129942	0.132918	0.137681	0.13395	0.1335	0.138715	0.134898	0.138549	0.133349	0.137987	0.137597
74.809		0.12834	0.136678	0.124817	0.1337	0.129613	0.134009	0.144911	0.132859	0.133321	0.130387	0.132965	0.13306	0.136268	0.131753	0.124368	0.137185	0.132645	0.131587	0.134378	0.133945	0.13091	0.133808	0.12891	0.134916	0.13135	0.131189	0.131341	0.132487	0.132483	0.131633	0.13475	0.126647	0.130168	0.132878	0.131824	0.131743	0.131896	0.128772	0.131698	0.136451	0.132717	0.132297	0.137439	0.133585	0.137148	0.132077	0.13664	0.136355
75.2112		0.12704	0.135445	0.123651	0.132456	0.128419	0.132674	0.143508	0.131574	0.132134	0.129155	0.131741	0.131856	0.134921	0.130514	0.123122	0.135939	0.131334	0.130293	0.133084	0.132653	0.129684	0.132552	0.127682	0.133684	0.130093	0.129938	0.130046	0.131224	0.131189	0.130383	0.133489	0.125477	0.129011	0.131646	0.130489	0.130473	0.130723	0.127626	0.130487	0.135229	0.131441	0.13108	0.13618	0.132272	0.135753	0.130797	0.135267	0.135104
75.6134		0.125746	0.134227	0.122499	0.131218	0.127233	0.131362	0.142116	0.130298	0.130961	0.127935	0.130506	0.130679	0.133586	0.12928	0.121864	0.134706	0.130042	0.129031	0.131798	0.131345	0.128467	0.131301	0.126497	0.13248	0.128846	0.128718	0.128751	0.129989	0.129928	0.129167	0.132266	0.124334	0.127879	0.13047	0.129189	0.12923	0.129576	0.126497	0.129285	0.134011	0.130129	0.129848	0.134941	0.130968	0.134378	0.129516	0.13388	0.133847
76.0156		0.12446	0.133022	0.121356	0.129991	0.126057	0.130079	0.140746	0.12903	0.129799	0.126728	0.129257	0.129526	0.132265	0.128048	0.120603	0.133479	0.128769	0.127804	0.130525	0.130032	0.127256	0.130049	0.125347	0.131305	0.127621	0.127525	0.127457	0.128784	0.1287	0.127984	0.131074	0.123211	0.126774	0.129341	0.127927	0.128013	0.128448	0.125377	0.128092	0.132799	0.128791	0.128602	0.133721	0.129682	0.133032	0.128243	0.132496	0.13259
76.4178		0.123183	0.131831	0.120216	0.12878	0.124893	0.128824	0.139402	0.127762	0.128648	0.125531	0.127991	0.128389	0.130958	0.126816	0.119349	0.132251	0.127511	0.126609	0.129268	0.12872	0.126051	0.128797	0.124217	0.130158	0.126426	0.126357	0.126167	0.127602	0.127505	0.126832	0.129904	0.122096	0.125694	0.12825	0.126707	0.126815	0.12733	0.124252	0.126906	0.131593	0.12744	0.127346	0.132518	0.128417	0.13172	0.126983	0.131127	0.131337
76.82		0.121915	0.13065	0.119074	0.127584	0.123738	0.127591	0.138091	0.126491	0.127503	0.124343	0.126709	0.127259	0.129666	0.125582	0.118108	0.131017	0.126263	0.125435	0.128029	0.127414	0.124849	0.127547	0.123091	0.129033	0.125261	0.125204	0.124882	0.126435	0.126339	0.125704	0.128743	0.120977	0.124635	0.127179	0.125523	0.125628	0.12621	0.123113	0.12572	0.130397	0.12609	0.126083	0.13133	0.127175	0.130441	0.125741	0.129786	0.130093
77.2222		0.120657	0.129478	0.117927	0.126402	0.122589	0.126372	0.136812	0.125209	0.126361	0.12316	0.125413	0.126125	0.128385	0.124344	0.116886	0.129772	0.12502	0.124271	0.126803	0.126116	0.12365	0.126303	0.121952	0.127921	0.124122	0.124059	0.123602	0.125274	0.125194	0.124593	0.127582	0.119845	0.123588	0.12611	0.124369	0.124439	0.125079	0.121948	0.124526	0.129213	0.124752	0.124819	0.13015	0.125955	0.129189	0.124521	0.128481	0.12886
77.6244		0.119407	0.128313	0.116776	0.125233	0.121441	0.125158	0.135563	0.123916	0.125216	0.121979	0.124107	0.124977	0.127114	0.123101	0.115688	0.128515	0.123777	0.123101	0.125584	0.124824	0.122457	0.125071	0.120784	0.126812	0.122999	0.122911	0.12233	0.124111	0.124061	0.12349	0.126414	0.118691	0.122545	0.125025	0.123233	0.12324	0.123931	0.120753	0.123317	0.128041	0.123438	0.123558	0.128974	0.124752	0.127955	0.123322	0.127214	0.12764
78.0266		0.118166	0.127152	0.115626	0.124072	0.120288	0.123942	0.134337	0.122612	0.124063	0.120798	0.122797	0.123811	0.125852	0.121857	0.114516	0.127249	0.122531	0.121911	0.124363	0.123534	0.121269	0.123856	0.119579	0.125697	0.121879	0.121753	0.121066	0.122942	0.12293	0.12239	0.125237	0.117514	0.121497	0.123904	0.122102	0.122022	0.122763	0.119527	0.122087	0.126878	0.122154	0.122306	0.127796	0.123561	0.126729	0.122141	0.125985	0.126433
78.4288		0.116932	0.125993	0.114483	0.122917	0.119123	0.122719	0.133127	0.121306	0.122899	0.119612	0.121489	0.122626	0.124599	0.120612	0.113369	0.125978	0.121282	0.120692	0.123133	0.122242	0.12009	0.122659	0.118331	0.124572	0.120753	0.120579	0.119812	0.121766	0.121794	0.121287	0.124051	0.116317	0.120441	0.122735	0.120963	0.120781	0.121579	0.118274	0.120834	0.125719	0.120906	0.121069	0.126611	0.122377	0.125502	0.120973	0.12479	0.125238
78.831		0.115706	0.124836	0.113353	0.121766	0.117941	0.121489	0.131923	0.120007	0.12172	0.118417	0.120186	0.121424	0.123353	0.119373	0.112246	0.124708	0.120029	0.119441	0.121886	0.120947	0.118922	0.121475	0.117042	0.123434	0.119613	0.119384	0.11857	0.120585	0.120644	0.120179	0.122858	0.115106	0.119374	0.121511	0.119805	0.119515	0.120385	0.117006	0.11956	0.124557	0.119692	0.119852	0.125415	0.121192	0.124267	0.11981	0.123619	0.12405
79.2332		0.114486	0.123678	0.11224	0.120618	0.116741	0.120257	0.130713	0.118727	0.120526	0.117212	0.118895	0.12021	0.122113	0.118142	0.111145	0.123442	0.118771	0.118162	0.120618	0.119646	0.117765	0.120295	0.115717	0.122284	0.118455	0.118167	0.117341	0.119401	0.119475	0.119064	0.12166	0.113887	0.118294	0.120233	0.118619	0.118228	0.119192	0.115735	0.118274	0.123385	0.118507	0.11866	0.124204	0.120004	0.123022	0.118645	0.122459	0.122866
79.6354		0.113275	0.122519	0.111141	0.119475	0.115521	0.119026	0.129488	0.117476	0.119323	0.115992	0.117616	0.118992	0.120874	0.116923	0.11006	0.122187	0.117505	0.116866	0.119325	0.118341	0.116624	0.119104	0.114367	0.121126	0.11728	0.11693	0.116126	0.118215	0.118282	0.117941	0.120458	0.112667	0.117205	0.118912	0.117403	0.116927	0.11801	0.114472	0.116983	0.122199	0.11734	0.117493	0.122976	0.118811	0.121765	0.117465	0.121296	0.121681
80.0376		0.112073	0.121358	0.110051	0.118335	0.114285	0.117801	0.128239	0.116258	0.118116	0.114756	0.11635	0.117772	0.119628	0.115717	0.108985	0.120944	0.116227	0.115567	0.118007	0.117032	0.1155	0.117887	0.113001	0.119963	0.116088	0.115677	0.114923	0.117026	0.117064	0.116805	0.119252	0.111448	0.116105	0.117561	0.116153	0.11562	0.116849	0.113228	0.115697	0.120999	0.116177	0.11635	0.12173	0.117613	0.120498	0.116262	0.120113	0.12049
80.4398		0.110882	0.120195	0.108961	0.117196	0.113041	0.116583	0.126961	0.115071	0.116913	0.113504	0.115097	0.116552	0.118364	0.114519	0.107913	0.119717	0.114933	0.114277	0.116665	0.115719	0.114397	0.116631	0.111632	0.118797	0.114881	0.114413	0.113732	0.115829	0.115823	0.115654	0.11804	0.110232	0.114994	0.116202	0.114874	0.114314	0.115713	0.112008	0.114422	0.11979	0.115004	0.115226	0.120464	0.116412	0.11922	0.115028	0.118896	0.11929
80.842		0.109705	0.119031	0.107861	0.116057	0.111797	0.115371	0.125653	0.113907	0.115725	0.112242	0.113854	0.115332	0.117072	0.113323	0.106833	0.118504	0.113622	0.113007	0.1153	0.1144	0.113319	0.115331	0.110271	0.117629	0.11366	0.113145	0.112551	0.114616	0.114565	0.114481	0.116823	0.109016	0.113872	0.11485	0.11357	0.113016	0.114603	0.110812	0.113159	0.118578	0.113806	0.114112	0.119179	0.115212	0.117931	0.11376	0.117636	0.118082
81.2442		0.108542	0.117865	0.106743	0.114912	0.110565	0.11416	0.124316	0.112754	0.114557	0.110974	0.112618	0.114106	0.115744	0.112123	0.105739	0.117304	0.112295	0.111761	0.113916	0.11307	0.112266	0.113992	0.108934	0.116457	0.112427	0.111881	0.111379	0.113382	0.113297	0.113281	0.115608	0.107799	0.112738	0.113519	0.112247	0.11173	0.113515	0.109639	0.111908	0.117372	0.112576	0.112998	0.117876	0.114014	0.116632	0.112459	0.116327	0.116869
81.6464		0.107394	0.116698	0.105608	0.113757	0.109353	0.112943	0.122958	0.111598	0.113413	0.109712	0.111386	0.112873	0.114381	0.110912	0.104624	0.116115	0.11096	0.110538	0.112518	0.111723	0.111237	0.112627	0.10763	0.115284	0.111182	0.110627	0.110218	0.112121	0.112028	0.112055	0.114403	0.106582	0.111592	0.112215	0.110915	0.11046	0.112444	0.108482	0.110666	0.11618	0.111309	0.111877	0.11656	0.112819	0.115324	0.111133	0.114975	0.115654
82.0485		0.106257	0.11553	0.104462	0.112591	0.10817	0.111718	0.121589	0.110428	0.112291	0.108464	0.110153	0.11163	0.112988	0.109684	0.103482	0.114932	0.10963	0.109334	0.111112	0.110356	0.110227	0.111261	0.10637	0.114111	0.109929	0.109386	0.109068	0.110833	0.110768	0.110804	0.113219	0.105368	0.110438	0.110939	0.109582	0.109204	0.111381	0.107339	0.109428	0.115003	0.110012	0.110742	0.115238	0.111628	0.114011	0.109794	0.11359	0.114444
82.4507		0.105128	0.114362	0.103318	0.111414	0.107019	0.110483	0.12022	0.109242	0.111184	0.107239	0.108916	0.110377	0.111582	0.108438	0.102315	0.11375	0.108321	0.108142	0.10971	0.108967	0.109228	0.109917	0.105161	0.112945	0.108673	0.10816	0.107932	0.109522	0.109523	0.109536	0.112067	0.104162	0.109279	0.109683	0.108258	0.107961	0.11032	0.106204	0.108197	0.113838	0.108697	0.109588	0.113916	0.110437	0.112701	0.108459	0.112192	0.113243
82.8529		0.104001	0.113193	0.10219	0.110229	0.105901	0.109241	0.118863	0.108039	0.11008	0.10604	0.107671	0.10912	0.110181	0.107177	0.101126	0.112561	0.107049	0.106954	0.10832	0.107558	0.108225	0.108618	0.104004	0.111793	0.107425	0.106946	0.106811	0.108194	0.108299	0.108265	0.11095	0.102972	0.108115	0.108434	0.106951	0.106728	0.109256	0.105074	0.106975	0.112677	0.107377	0.108415	0.112606	0.109243	0.111404	0.107143	0.110801	0.112055
83.2551		0.102872	0.112025	0.101089	0.109042	0.104811	0.108	0.117529	0.106825	0.108968	0.104867	0.106418	0.107862	0.108804	0.105907	0.0999265	0.111361	0.105824	0.105765	0.106955	0.106141	0.107204	0.107377	0.102891	0.110661	0.106192	0.105742	0.105703	0.106859	0.107091	0.107003	0.109863	0.101805	0.106947	0.10718	0.105666	0.105503	0.108186	0.103948	0.105769	0.111508	0.106069	0.107226	0.111318	0.108043	0.110129	0.105861	0.109437	0.110878
83.6573		0.101738	0.110854	0.100023	0.107864	0.103742	0.106769	0.116223	0.105607	0.107835	0.103713	0.105153	0.10661	0.107467	0.104638	0.0987278	0.110147	0.104649	0.104569	0.105625	0.104729	0.106149	0.106195	0.101806	0.109553	0.104982	0.104543	0.104606	0.105529	0.105893	0.105761	0.10879	0.100664	0.105771	0.105906	0.104406	0.104283	0.107107	0.102822	0.104584	0.110319	0.104785	0.106024	0.110059	0.106836	0.108881	0.104622	0.108118	0.109708
84.0595		0.100596	0.109681	0.0989855	0.1067	0.102688	0.105559	0.114948	0.104387	0.106672	0.102567	0.103877	0.105368	0.106179	0.103376	0.0975453	0.108917	0.103516	0.103365	0.104337	0.103342	0.105047	0.10506	0.100724	0.108465	0.103799	0.103344	0.10351	0.104211	0.104695	0.104545	0.107707	0.0995502	0.104578	0.104602	0.103166	0.103062	0.106016	0.101691	0.103428	0.109101	0.103532	0.104814	0.108831	0.105624	0.107659	0.10343	0.106851	0.108541
84.4617		0.0994522	0.1085	0.0979658	0.105558	0.10164	0.104377	0.113701	0.103163	0.105475	0.101416	0.102589	0.104136	0.10494	0.102127	0.0963941	0.107677	0.102413	0.102149	0.103094	0.102	0.103892	0.103949	0.0996178	0.107387	0.10264	0.102142	0.102404	0.102913	0.103482	0.103356	0.106583	0.0984592	0.10336	0.10326	0.101939	0.101839	0.104909	0.10055	0.102299	0.107851	0.102313	0.103601	0.107632	0.104412	0.106451	0.102283	0.10564	0.107369
84.8639		0.0983101	0.107307	0.0969459	0.104439	0.100593	0.103227	0.112473	0.101927	0.104244	0.10025	0.101288	0.102913	0.103742	0.100894	0.0952863	0.106437	0.101321	0.100921	0.101893	0.100721	0.102683	0.102834	0.0984595	0.106306	0.101499	0.100937	0.101278	0.101639	0.102245	0.102189	0.105394	0.0973841	0.102113	0.101881	0.100712	0.100605	0.103783	0.0993917	0.101195	0.106574	0.101125	0.102388	0.106455	0.103208	0.105243	0.101177	0.104482	0.106188
85.2661		0.097178	0.106095	0.0959084	0.103342	0.0995448	0.102103	0.111253	0.100669	0.102988	0.0990603	0.0999737	0.101691	0.102574	0.0996752	0.0942289	0.105208	0.100224	0.0996792	0.100724	0.0995201	0.101428	0.101694	0.097228	0.105203	0.100367	0.0997302	0.100122	0.10039	0.100979	0.101038	0.10412	0.0963167	0.100836	0.100468	0.0994741	0.0993562	0.102639	0.0982109	0.100108	0.105278	0.0999615	0.10118	0.105287	0.102021	0.104015	0.100106	0.103371	0.104997
85.6683		0.0960608	0.104859	0.0948384	0.102263	0.098495	0.100996	0.110027	0.099381	0.101719	0.0978434	0.098649	0.100468	0.101421	0.098467	0.0932227	0.104003	0.0991113	0.0984225	0.0995736	0.098401	0.100144	0.100512	0.0959136	0.104063	0.0992329	0.098526	0.098931	0.099167	0.0996876	0.0998967	0.102758	0.0952495	0.0995396	0.0990301	0.0982151	0.0980865	0.101478	0.0970065	0.0990322	0.103977	0.0988171	0.0999805	0.104113	0.10086	0.102753	0.0990621	0.102302	0.103798
86.0705		0.0949601	0.103594	0.0937313	0.101192	0.097445	0.0998864	0.108786	0.0980609	0.100452	0.0966027	0.0973157	0.0992388	0.100272	0.0972651	0.0922612	0.102834	0.0979785	0.097152	0.0984217	0.0973617	0.0988532	0.0992842	0.0945207	0.102879	0.0980923	0.0973294	0.0977084	0.0979665	0.0983808	0.0987654	0.101318	0.0941793	0.0982392	0.0975797	0.0969286	0.0967956	0.100309	0.095782	0.0979599	0.102681	0.0976854	0.0987915	0.102923	0.0997288	0.101445	0.0980407	0.101272	0.102597
86.4727		0.09387	0.102302	0.09259	0.100119	0.0963959	0.0987584	0.107519	0.0967115	0.0992017	0.0953452	0.0959778	0.0980049	0.0991165	0.0960649	0.0913314	0.101704	0.0968309	0.0958697	0.0972486	0.0963911	0.0975773	0.0980169	0.0930668	0.101651	0.0969404	0.096148	0.0964631	0.0967828	0.0970754	0.0976455	0.0998216	0.0931051	0.0969574	0.0961256	0.0956133	0.0954872	0.0991441	0.0945447	0.0968889	0.101398	0.0965587	0.0976142	0.101704	0.0986239	0.100094	0.0970368	0.100278	0.101398
86.8749		0.0927757	0.100986	0.0914267	0.0990313	0.095348	0.097593	0.106225	0.0953408	0.0979801	0.0940812	0.094638	0.0967697	0.0979476	0.0948637	0.090417	0.10061	0.0956757	0.0945792	0.0960367	0.09547	0.0963358	0.0967222	0.0915786	0.100392	0.0957781	0.0949871	0.095208	0.0956088	0.0957875	0.0965416	0.0982941	0.0920293	0.0957141	0.0946746	0.0942742	0.0941711	0.0979966	0.0933049	0.0958165	0.100128	0.0954302	0.0964471	0.100454	0.0975377	0.098707	0.0960426	0.0993155	0.100205
87.2771		0.0916554	0.0996527	0.0902548	0.0979171	0.0943004	0.0963793	0.104906	0.0939601	0.096794	0.0928218	0.0932967	0.0955396	0.0967583	0.0936608	0.0895009	0.0995399	0.0945213	0.0932848	0.0947753	0.0945758	0.0951397	0.0954147	0.0900844	0.099118	0.0946065	0.0938519	0.0939559	0.0944339	0.0945289	0.0954561	0.0967635	0.0909533	0.0945234	0.0932297	0.0929183	0.0928603	0.0968771	0.0920722	0.0947395	0.0988699	0.0942929	0.0952851	0.0991691	0.0964558	0.0972971	0.0950472	0.0983738	0.0990177
87.6793		0.0904858	0.098306	0.0890871	0.0967677	0.0932511	0.0951165	0.103565	0.0925757	0.0956434	0.0915766	0.0919515	0.0943201	0.0955436	0.0924583	0.0885667	0.0984765	0.0933702	0.09199	0.0934641	0.0936832	0.0939894	0.0941057	0.0886095	0.0978501	0.0934288	0.0927429	0.0927166	0.0932467	0.0933027	0.0943848	0.0952508	0.0898784	0.0933883	0.0917884	0.0915553	0.0915697	0.0957891	0.090853	0.0936518	0.0976181	0.0931408	0.0941204	0.0978517	0.095361	0.0958769	0.094034	0.0974349	0.0978288
88.0815		0.0892454	0.0969502	0.0879285	0.0955795	0.0921982	0.0938146	0.102212	0.0911901	0.0945215	0.0903517	0.0905973	0.0931139	0.0942956	0.0912606	0.0876052	0.097401	0.0922176	0.090697	0.0921133	0.0927691	0.0928749	0.0928026	0.0871718	0.0966076	0.0922467	0.091659	0.0914926	0.0920366	0.0920999	0.0933179	0.093775	0.0888024	0.0922999	0.0903471	0.0901973	0.0903113	0.0947264	0.0896502	0.0925409	0.0963682	0.0919705	0.092943	0.0965048	0.0942344	0.0944585	0.0929864	0.0964739	0.0966286
88.4837		0.0879246	0.0955844	0.0867774	0.0943564	0.0911413	0.0924933	0.100852	0.0898014	0.0934166	0.0891504	0.089228	0.0919194	0.0930083	0.0900714	0.0866123	0.0962981	0.0910533	0.0894054	0.0907459	0.0918129	0.0917795	0.09151	0.0857823	0.0954034	0.0910649	0.0905954	0.0902781	0.090798	0.0909036	0.0922386	0.0923467	0.0877203	0.0912396	0.0889026	0.0888557	0.0890937	0.0936733	0.0884611	0.0913938	0.0951183	0.0907845	0.0917429	0.0951329	0.0930626	0.0930494	0.0918842	0.0954597	0.0954068
88.8859		0.0865314	0.09421	0.0856213	0.0931103	0.0900813	0.0911824	0.0994926	0.0884046	0.0923153	0.0879749	0.0878395	0.0907315	0.0916794	0.0888965	0.0855911	0.0951598	0.0898651	0.0881143	0.0893918	0.0907998	0.0906853	0.0902312	0.0844489	0.0942421	0.089887	0.0895462	0.0890655	0.0895344	0.0896922	0.0911303	0.0909783	0.0866267	0.090185	0.0874562	0.0875445	0.0879205	0.092607	0.0872831	0.0901979	0.0938694	0.0895898	0.0905126	0.0937411	0.0918359	0.0916576	0.090715	0.0943654	0.0941542
89.2881		0.0850936	0.0928286	0.0844439	0.0918573	0.0890213	0.0899109	0.0981379	0.0870024	0.091205	0.0868269	0.0864368	0.0895449	0.0903136	0.0877383	0.0845499	0.0939879	0.0886417	0.0868226	0.0880816	0.0897201	0.0895797	0.0889692	0.083175	0.0931239	0.0887196	0.088505	0.0878429	0.0882578	0.0884456	0.089984	0.0896798	0.0855179	0.0891146	0.0860134	0.0862748	0.0867912	0.0915034	0.0861155	0.0889482	0.0926249	0.0883997	0.0892487	0.0923381	0.0905559	0.0902915	0.0894749	0.093173	0.0928692
89.6903		0.0836521	0.0914483	0.0832277	0.0906169	0.0879645	0.0887087	0.0967917	0.0856045	0.0900774	0.0857087	0.0850326	0.0883527	0.0889269	0.086602	0.0835006	0.0927927	0.0873804	0.0855304	0.0868418	0.0885704	0.08846	0.0877304	0.0819694	0.0920424	0.0875701	0.0874651	0.0866056	0.0869906	0.0871532	0.0888	0.0884609	0.0843924	0.0880155	0.0845846	0.0850563	0.0857032	0.0903435	0.0849622	0.0876516	0.0913887	0.0872251	0.0879535	0.0909364	0.0892334	0.0889659	0.0881745	0.091881	0.0915588
90.0925		0.082259	0.0900855	0.0819599	0.0894058	0.0869139	0.0875953	0.095458	0.0842302	0.0889293	0.0846223	0.0836501	0.0871542	0.0875452	0.0854861	0.0824517	0.0915902	0.0860872	0.0842391	0.0856891	0.0873529	0.0873349	0.086521	0.0808412	0.0909887	0.0864424	0.0864217	0.085357	0.0857585	0.0858177	0.0875932	0.0873298	0.0832542	0.0868825	0.0831844	0.0838924	0.084655	0.0891185	0.083832	0.0863262	0.0901638	0.0860761	0.0866348	0.089553	0.0878912	0.0876961	0.0868347	0.0905063	0.0902359
90.4947		0.0809612	0.0887625	0.0806349	0.0882353	0.08587	0.0865783	0.0941395	0.0829078	0.0877626	0.083568	0.0823169	0.0859502	0.0862	0.0843896	0.0814112	0.0903967	0.084776	0.0829557	0.0846249	0.0860752	0.0862209	0.0853432	0.0797957	0.0899559	0.0853346	0.0853719	0.0841091	0.0845863	0.0844536	0.0863883	0.0862901	0.0821114	0.0857217	0.081826	0.082779	0.0836448	0.0878341	0.0827361	0.0849979	0.0889524	0.0849524	0.0853054	0.088206	0.0865581	0.0864966	0.0854853	0.0890811	0.0889202
90.8969		0.079789	0.0875023	0.0792605	0.0871094	0.0848307	0.0856518	0.0928393	0.0816629	0.0865825	0.0825439	0.0810599	0.0847472	0.0849238	0.0833078	0.08038	0.0892238	0.0834665	0.0816874	0.0836397	0.0847478	0.0851365	0.0841935	0.0788325	0.0889354	0.0842365	0.0843132	0.0828797	0.0834892	0.0830858	0.0852149	0.0853326	0.0809739	0.0845405	0.0805205	0.0817036	0.0826713	0.0865106	0.0816832	0.0836937	0.0877569	0.0838455	0.0839812	0.086916	0.0852706	0.0853761	0.0841598	0.087644	0.0876303
91.2991		0.0787495	0.0863244	0.0778538	0.0860235	0.0837918	0.0847979	0.0915593	0.0805105	0.0853961	0.0815388	0.0798969	0.0835521	0.083737	0.0822327	0.0793558	0.0880747	0.0821775	0.0804442	0.0827116	0.0833845	0.0840938	0.0830587	0.0779367	0.0879201	0.0831317	0.0832453	0.0816885	0.082468	0.0817398	0.0840941	0.0844432	0.0798499	0.083348	0.0792734	0.0806441	0.0817304	0.0851803	0.0806765	0.0824324	0.0865818	0.0827374	0.0826795	0.0856954	0.084062	0.0843309	0.0828847	0.0862326	0.0863809
91.7013		0.0778262	0.0852359	0.0764431	0.0849691	0.0827482	0.083987	0.0902971	0.0794488	0.0842103	0.080538	0.0788309	0.0823696	0.0826445	0.0811544	0.0783322	0.086944	0.0809236	0.0792323	0.0818149	0.0820001	0.0830926	0.0819204	0.0770798	0.0869006	0.0819995	0.0821681	0.0805474	0.0815097	0.0804389	0.0830361	0.0835971	0.0787474	0.0821471	0.0780837	0.0795788	0.0808158	0.0838819	0.0797072	0.0812198	0.0854338	0.081608	0.0814169	0.0845503	0.0829583	0.0833461	0.0816782	0.0848722	0.085177
92.1035		0.0769799	0.0842301	0.0750594	0.0839368	0.0816955	0.0831899	0.0890486	0.0784566	0.0830318	0.0795196	0.0778458	0.0811997	0.0816287	0.0800627	0.0773049	0.0858194	0.0797151	0.0780541	0.0809232	0.0806069	0.0821184	0.0807572	0.0762224	0.0858666	0.0808232	0.0810842	0.0794588	0.0805893	0.0791976	0.0820321	0.0827707	0.0776686	0.080936	0.0769446	0.0784888	0.0799134	0.0826541	0.0787598	0.0800473	0.08432	0.0804395	0.0802082	0.0834761	0.0819702	0.0823977	0.0805445	0.0835738	0.0840158
92.5057		0.0761624	0.0832835	0.0737341	0.082918	0.0806321	0.0823742	0.0878076	0.0775009	0.081867	0.0784632	0.0769136	0.080038	0.0806542	0.0789463	0.0762693	0.0846867	0.0785572	0.0769043	0.080016	0.0792122	0.0811456	0.0795548	0.0753227	0.0848059	0.079597	0.079996	0.0784118	0.0796759	0.0780173	0.0810603	0.0819423	0.0766149	0.0797059	0.0758451	0.077367	0.0790052	0.0815278	0.0778113	0.0788975	0.0832445	0.0792235	0.0790639	0.0824568	0.0810908	0.0814608	0.079478	0.0823289	0.0828842
92.9079		0.0753304	0.0823698	0.0724926	0.0819067	0.0795591	0.0815163	0.0865697	0.0765436	0.0807225	0.077356	0.0759967	0.0788752	0.0796768	0.0777983	0.0752265	0.0835347	0.0774499	0.0757723	0.0790823	0.0778193	0.0801456	0.0783078	0.0743497	0.0837124	0.0783271	0.0789097	0.0773896	0.0787436	0.0768911	0.080089	0.0811016	0.0755839	0.0784528	0.0747732	0.076219	0.0780709	0.0805199	0.0768422	0.0777489	0.0822039	0.0779609	0.0779895	0.0814726	0.0802939	0.0805179	0.0784678	0.0811211	0.0817643
93.3101		0.0744541	0.0814528	0.0713484	0.080897	0.0784799	0.0806018	0.0853307	0.0755569	0.0796054	0.0761984	0.0750558	0.0777022	0.0786535	0.076618	0.0741807	0.0823593	0.0763939	0.0746439	0.0781224	0.0764242	0.0790972	0.0770262	0.0732897	0.0825805	0.0770338	0.0778296	0.076371	0.0777748	0.0758068	0.0790897	0.0802493	0.074575	0.0771716	0.0737169	0.0750645	0.0770922	0.0796292	0.075839	0.0765898	0.0811851	0.0766704	0.0769839	0.0804991	0.0795354	0.0795631	0.0775018	0.0799267	0.0806346
93.7123		0.0735252	0.0805074	0.0703021	0.0798838	0.0773985	0.0796225	0.084091	0.0745331	0.0785221	0.0750053	0.0740621	0.0765109	0.0775587	0.0754145	0.0731366	0.0811655	0.0753934	0.0735046	0.0771441	0.0750194	0.077995	0.0757319	0.0721571	0.0814149	0.0757452	0.0767616	0.0753428	0.0767662	0.0747492	0.0780408	0.0793952	0.0735843	0.0758682	0.0726676	0.0739304	0.0760568	0.0788354	0.0748	0.0754183	0.0801662	0.0753759	0.0760388	0.0795181	0.0787618	0.0786044	0.0765704	0.0787306	0.0794728
94.1145		0.0725566	0.0795108	0.0693349	0.0788623	0.0763177	0.0785814	0.0828555	0.073489	0.0774763	0.0738086	0.0730019	0.0752976	0.0763888	0.0742054	0.0720997	0.0799661	0.07445	0.0723448	0.0761652	0.0735993	0.0768545	0.0744527	0.070986	0.0802274	0.0744864	0.0757069	0.0743016	0.0757235	0.0737103	0.0769394	0.0785514	0.0726095	0.0745553	0.0716213	0.072847	0.0749631	0.0781011	0.0737363	0.0742494	0.0791222	0.0741089	0.0751394	0.0785181	0.0779211	0.0776574	0.075671	0.0775273	0.0782594
94.5167		0.0715707	0.0784534	0.0684189	0.0778209	0.075237	0.0774808	0.0816291	0.0724589	0.0764678	0.0726462	0.0718794	0.0740667	0.0751666	0.0730177	0.0710728	0.0787785	0.0735694	0.0711692	0.0752052	0.0721607	0.0757095	0.0732146	0.0698273	0.0790372	0.0732766	0.0746602	0.0732569	0.074659	0.0726829	0.0757932	0.0777284	0.0716465	0.0732501	0.0705808	0.0718349	0.0738192	0.0773784	0.0726651	0.0731086	0.0780342	0.0728964	0.0742668	0.0774972	0.0769702	0.0767369	0.0748004	0.0763283	0.0769842
94.9189		0.0705954	0.0773311	0.0675132	0.0767528	0.0741519	0.076331	0.0804171	0.0714862	0.0754914	0.0715582	0.0707151	0.0728318	0.0739307	0.0718832	0.0700561	0.0776199	0.0727529	0.0699894	0.0742846	0.0707102	0.0746042	0.0720368	0.0687288	0.0778657	0.0721199	0.0736146	0.0722254	0.0735881	0.0716687	0.0746244	0.0769285	0.0706891	0.0719715	0.0695528	0.0709098	0.0726435	0.0766176	0.0716013	0.0720251	0.0768972	0.071757	0.0734014	0.076465	0.0758873	0.0758483	0.0739556	0.0751545	0.0756423
95.3211		0.0696488	0.0761472	0.0665791	0.075652	0.0730547	0.0751434	0.0792209	0.0706084	0.074538	0.070569	0.0695406	0.0716113	0.0727262	0.070827	0.069051	0.0765032	0.0720027	0.0688297	0.0734194	0.0692648	0.07358	0.0709229	0.0677254	0.0767323	0.0710105	0.0725552	0.0712262	0.0725245	0.0706719	0.0734569	0.076143	0.069734	0.0707327	0.0685495	0.0700731	0.0714649	0.075777	0.0705568	0.0710213	0.0757248	0.0706957	0.0725268	0.0754427	0.0746736	0.0749834	0.0731238	0.0740343	0.0742455
95.7233		0.0687412	0.0749096	0.0655793	0.0745158	0.0719362	0.0739348	0.0780426	0.0698453	0.073596	0.069686	0.0683933	0.0704317	0.0715893	0.069868	0.0680558	0.0754326	0.0713106	0.0677152	0.0726149	0.0678518	0.072662	0.0698648	0.0668239	0.0756463	0.0699342	0.0714714	0.0702706	0.0714811	0.0696944	0.072313	0.0753556	0.0687738	0.0695408	0.0675858	0.0693186	0.0703095	0.0748321	0.069527	0.0701069	0.0745473	0.0697054	0.0716331	0.0744497	0.0733537	0.0741194	0.0722856	0.0729954	0.0728149
96.1255		0.0678647	0.0736304	0.0644925	0.0733534	0.070788	0.0727244	0.0768802	0.0691899	0.0726533	0.0688922	0.0672997	0.0693153	0.0705374	0.0690055	0.0670743	0.0744022	0.0706678	0.0666689	0.0718681	0.0665074	0.071848	0.0688426	0.066005	0.07461	0.0688771	0.0703573	0.0693597	0.0704664	0.0687376	0.0712022	0.0745413	0.0678037	0.0683985	0.0666693	0.0686291	0.0692011	0.0737808	0.0684944	0.0692703	0.0734014	0.0687668	0.0707179	0.0735123	0.0719684	0.0732221	0.0714113	0.0720517	0.071387
96.5277		0.0670091	0.0723256	0.0633099	0.0721751	0.0696055	0.0715392	0.0757285	0.0686107	0.0716987	0.068153	0.0662762	0.0682795	0.0695672	0.068219	0.066109	0.0733951	0.0700573	0.0657002	0.0711603	0.0652728	0.0711046	0.0678362	0.0652234	0.073611	0.0678293	0.0692133	0.0684751	0.0694897	0.0677942	0.070121	0.0736764	0.0668213	0.0672978	0.0658041	0.0679843	0.0681481	0.0726436	0.0674322	0.0684845	0.072318	0.0678543	0.0697841	0.0726431	0.0705649	0.0722604	0.0704689	0.0711973	0.0700025
96.9299		0.0661554	0.0710149	0.0620417	0.0709972	0.0683906	0.0704005	0.0745836	0.0680589	0.070721	0.0674194	0.0653137	0.0673239	0.0686532	0.0674693	0.0651646	0.0723859	0.0694563	0.064803	0.0704608	0.0641822	0.0703711	0.0668241	0.0644239	0.0726318	0.0667888	0.0680491	0.0675909	0.0685524	0.0668515	0.069051	0.0727394	0.0658147	0.0662283	0.0649804	0.06735	0.0671502	0.0714574	0.0663079	0.0677004	0.0713092	0.0669451	0.0688358	0.0718396	0.0691803	0.0712146	0.0694285	0.0704076	0.0686977
97.3321		0.0652935	0.0697174	0.0607083	0.0698296	0.0671531	0.0693229	0.0734421	0.0674766	0.0697081	0.0666442	0.0643852	0.0664325	0.0677533	0.0667119	0.0642399	0.0713437	0.0688355	0.0639576	0.0697322	0.0632638	0.0695726	0.0657978	0.0635571	0.0716502	0.0657596	0.0668808	0.0666749	0.0676497	0.0658943	0.067965	0.0717133	0.0647737	0.0651715	0.0641774	0.066688	0.0661816	0.0702655	0.0650942	0.0668668	0.0703621	0.0660239	0.0678734	0.07108	0.0678413	0.0700807	0.0682744	0.0696309	0.0674956
97.7343		0.0644199	0.0684435	0.059337	0.0686768	0.0659099	0.0683056	0.0722964	0.0668118	0.0686462	0.0657866	0.0634461	0.0655681	0.0668218	0.0658933	0.063327	0.0702383	0.0681583	0.063135	0.0689354	0.0625276	0.0686384	0.0647572	0.0625965	0.070639	0.0647436	0.0657227	0.0657014	0.0667635	0.0649074	0.0668323	0.0705897	0.0636756	0.0641112	0.0633627	0.0659497	0.0652139	0.0691056	0.0637776	0.0659311	0.0694416	0.0650913	0.0668914	0.0703186	0.0665484	0.0688743	0.0670046	0.0688092	0.0664009
98.1365		0.0635442	0.0672032	0.0579521	0.0675318	0.0646834	0.0673248	0.0711389	0.0660236	0.0675206	0.0648247	0.0624485	0.0646872	0.0658161	0.0649776	0.0624118	0.0690454	0.0673858	0.0623068	0.0680373	0.061962	0.0675213	0.0637157	0.0615444	0.0695837	0.0637399	0.0645904	0.0646569	0.0658655	0.0638818	0.0656303	0.0693726	0.0624992	0.0630244	0.062505	0.0650906	0.0642096	0.0680014	0.0623644	0.0648602	0.068501	0.0641539	0.0658781	0.0694921	0.0652914	0.0676268	0.0656379	0.0678877	0.0653919
98.5387		0.0626825	0.0659927	0.0565772	0.0663815	0.063497	0.0663426	0.0699557	0.0650905	0.0663188	0.0637535	0.061351	0.0637435	0.0647001	0.0639423	0.0614763	0.0677536	0.0664845	0.0614524	0.0670146	0.0615388	0.0662134	0.0626878	0.0604367	0.0684703	0.0627453	0.0634865	0.0635432	0.0649163	0.0628236	0.064352	0.06808	0.0612251	0.0618925	0.0615783	0.06408	0.0631465	0.066958	0.0608786	0.0636427	0.0674966	0.0632251	0.0648197	0.0685358	0.0640435	0.066372	0.0642114	0.0668195	0.0644328
98.9409		0.0618625	0.0648029	0.0552281	0.0652008	0.0623704	0.0653096	0.0687404	0.064008	0.0650355	0.0625903	0.0601347	0.0627065	0.0634493	0.0627893	0.0605021	0.0663674	0.0654284	0.0605604	0.0658671	0.0612089	0.0647519	0.0616886	0.0593238	0.0672968	0.0617463	0.0624131	0.062374	0.0638768	0.0617528	0.0630195	0.0667449	0.059845	0.0607034	0.060575	0.0629132	0.0620137	0.0659636	0.0593592	0.0622998	0.0664014	0.0623139	0.0637058	0.0673923	0.0627863	0.0651405	0.0627701	0.0655994	0.063474
99.3431		0.0611031	0.063624	0.0539189	0.0639682	0.0613147	0.0641799	0.0674866	0.0627904	0.0636764	0.0613618	0.0588064	0.0615712	0.0620553	0.0615385	0.0594782	0.0649097	0.0642077	0.0596293	0.0646079	0.0609111	0.0632133	0.06073	0.0582666	0.0660713	0.0607315	0.0613657	0.0611716	0.0627204	0.0606951	0.0616749	0.0654088	0.0583719	0.059457	0.0595051	0.0616224	0.0608258	0.0649946	0.0578555	0.0608786	0.0652122	0.0614204	0.0625334	0.066034	0.0615093	0.0639439	0.0613652	0.0642484	0.0624848
99.7453		0.0604148	0.0624481	0.0526615	0.0626599	0.0603293	0.0629277	0.0661991	0.0614643	0.06226	0.0600988	0.0574038	0.0603613	0.0605286	0.0602288	0.0584033	0.0634189	0.0628343	0.0586634	0.063268	0.0605915	0.0616955	0.059812	0.0573072	0.0648075	0.0596911	0.0603392	0.0599548	0.061444	0.0596866	0.06038	0.0641269	0.0568423	0.0581743	0.058401	0.0602731	0.0596114	0.0640219	0.0564097	0.0594452	0.0639501	0.0605306	0.0613091	0.0644681	0.060214	0.0627772	0.0600418	0.0628237	0.0614407
100.147		0.0597912	0.0612728	0.0514734	0.0612679	0.059401	0.061554	0.0648893	0.0600718	0.0608155	0.0588354	0.0559848	0.0591249	0.0589022	0.0588968	0.0572871	0.0619433	0.0613398	0.0576667	0.0618857	0.0602043	0.0602936	0.05893	0.0564628	0.0635246	0.0586218	0.0593335	0.0587398	0.0600715	0.0587558	0.0591962	0.0629385	0.0553098	0.0568868	0.0573036	0.0589581	0.0584099	0.0630158	0.0550571	0.0580711	0.0626534	0.0596168	0.0600467	0.0627473	0.058916	0.06161	0.0588315	0.0613993	0.0603501
100.55		0.0592025	0.0601027	0.0503772	0.0597902	0.0585071	0.0600895	0.0635775	0.0586617	0.0593772	0.0575957	0.0546206	0.0579228	0.0572317	0.0575834	0.0561484	0.0605331	0.0597721	0.0566436	0.0604982	0.0597328	0.0590757	0.0580796	0.0557203	0.0622506	0.0575282	0.0583492	0.0575285	0.0586528	0.0579181	0.0581767	0.0618769	0.0538421	0.0556424	0.0562581	0.0577709	0.057252	0.0619493	0.053814	0.0568167	0.0613668	0.0586558	0.058763	0.0609529	0.0576384	0.0604053	0.0577517	0.0600565	0.0592424
100.952		0.0586038	0.0589449	0.0493939	0.0582453	0.0576218	0.0585809	0.0622864	0.0572875	0.0579776	0.0564058	0.0533772	0.056809	0.0555922	0.0563121	0.0550038	0.0592311	0.0581852	0.0555949	0.0591338	0.0591806	0.0580655	0.0572635	0.0550473	0.0610097	0.0564242	0.0573846	0.0563222	0.0572525	0.0571729	0.0573361	0.0609401	0.0525008	0.0544892	0.0552908	0.0567822	0.0561553	0.0608009	0.0526814	0.0557262	0.060131	0.0576262	0.0574735	0.0591838	0.0563971	0.0591247	0.0567984	0.0588499	0.0581663
101.354		0.0579434	0.0578144	0.0485388	0.0566611	0.0567234	0.0570841	0.06103	0.0559977	0.0566412	0.0552875	0.0523166	0.0558245	0.0540675	0.055098	0.0538716	0.0580659	0.0566315	0.0545258	0.0578056	0.0585787	0.0572382	0.0564893	0.0544048	0.0598237	0.0553286	0.0564421	0.0551261	0.0559398	0.056504	0.0566602	0.0601007	0.051335	0.0534709	0.0544106	0.0560223	0.0551139	0.059558	0.0516525	0.0548188	0.0589746	0.0565307	0.0561923	0.057537	0.0552009	0.0577492	0.0559555	0.0578118	0.0571678
101.756		0.0571761	0.0567245	0.0478233	0.0550841	0.0558015	0.0556483	0.0598098	0.0548314	0.0553827	0.0542658	0.0514764	0.0549752	0.0527353	0.0539374	0.0527642	0.0570473	0.0551514	0.0534455	0.0565129	0.0579676	0.0565301	0.0557789	0.0537668	0.0587096	0.0542672	0.0555141	0.0539565	0.0547651	0.0558852	0.0560949	0.0593013	0.050367	0.0526103	0.0536018	0.0554655	0.054112	0.0582233	0.0507142	0.0540964	0.0579098	0.0553899	0.0549357	0.0560868	0.0540484	0.0562856	0.0551945	0.0569372	0.0562866
102.158		0.0562862	0.0556929	0.0472381	0.0535627	0.05486	0.0543054	0.0586206	0.0538067	0.0542075	0.0533721	0.0508795	0.0542445	0.0516454	0.0528246	0.0516958	0.0561664	0.0537705	0.0523676	0.0552519	0.057386	0.0558599	0.0551596	0.0531366	0.0576704	0.053265	0.0545927	0.0528494	0.0537573	0.0552949	0.0555633	0.0584728	0.049592	0.0519116	0.0528346	0.0550446	0.0531212	0.0568215	0.0498587	0.0535495	0.0569327	0.0542367	0.0537293	0.0548701	0.0529356	0.0547762	0.0544856	0.0561916	0.055545
102.561		0.0552898	0.0547451	0.0467671	0.052151	0.0539167	0.053071	0.0574425	0.0529286	0.0531145	0.0526295	0.0505234	0.0536024	0.050807	0.0517488	0.0506825	0.0553979	0.0525052	0.0513152	0.0540226	0.0568592	0.0551545	0.0546563	0.0525417	0.0567015	0.052345	0.0536728	0.0518609	0.0529204	0.05472	0.0549972	0.0575528	0.0489861	0.051356	0.0520803	0.0546642	0.052125	0.0554047	0.0490856	0.0531698	0.0560258	0.0531197	0.0526129	0.0538886	0.0518644	0.0532922	0.0538	0.0555353	0.0549379
102.963		0.0542381	0.0539081	0.046384	0.0508892	0.0529981	0.0519536	0.0562627	0.0521792	0.052098	0.0520581	0.0503896	0.0530136	0.0501824	0.0507212	0.0497523	0.054706	0.051356	0.0503092	0.0528422	0.0563929	0.0543707	0.0542887	0.0520247	0.0557916	0.0515285	0.0527577	0.0510569	0.0522382	0.0541612	0.0543418	0.0565008	0.0485143	0.0509169	0.051326	0.0542266	0.051126	0.0540501	0.0484073	0.052946	0.0551627	0.0520767	0.051639	0.0531084	0.0508605	0.0519261	0.053117	0.0549312	0.0544424
103.365		0.0532021	0.0532166	0.0460655	0.0498052	0.0521309	0.0509626	0.0550798	0.0515429	0.0511478	0.0516552	0.0504391	0.0524587	0.0496976	0.0497653	0.0489434	0.0540512	0.0503217	0.0493725	0.0517518	0.0559718	0.053506	0.0540553	0.0516315	0.0549311	0.0508289	0.0518662	0.0504956	0.0516852	0.053637	0.0535838	0.055315	0.0481478	0.050562	0.0505894	0.0536677	0.0501517	0.0528484	0.0478431	0.0528684	0.0543119	0.0511413	0.0508607	0.052475	0.0499726	0.050769	0.0524203	0.0543669	0.0540144
103.767		0.0522514	0.0526952	0.0457922	0.048894	0.0513335	0.0501129	0.0539131	0.0509975	0.0502465	0.051389	0.0506136	0.0519319	0.0492575	0.0489282	0.0482956	0.0533971	0.0493994	0.0485263	0.0508091	0.0555675	0.0525946	0.0539396	0.0513779	0.0541176	0.050246	0.0510272	0.050207	0.0512395	0.0531697	0.0527412	0.0540307	0.0478639	0.050267	0.0499136	0.0529659	0.0492504	0.0518824	0.0474146	0.0529233	0.0534412	0.0503312	0.0503109	0.0519255	0.0492696	0.0498937	0.0517016	0.053858	0.0536104
104.169		0.05143	0.052356	0.0455504	0.0481268	0.0506067	0.0494248	0.0527991	0.0505376	0.0493677	0.0512026	0.0508419	0.0514405	0.0487743	0.0482707	0.0478352	0.0527169	0.0485808	0.0477889	0.0500795	0.0551468	0.05169	0.0539048	0.0512355	0.0533531	0.0497682	0.050269	0.0501743	0.0508846	0.0527806	0.0518568	0.0527064	0.0476572	0.0500084	0.0493546	0.0521628	0.0484765	0.0512005	0.0471374	0.0530723	0.0525201	0.0496439	0.049979	0.0514095	0.0488244	0.0493349	0.0509502	0.0534318	0.0531823
104.572		0.050746	0.0521861	0.045335	0.047444	0.0499289	0.0489142	0.0517886	0.0501632	0.0484762	0.0510136	0.0510459	0.0510005	0.0481862	0.0478449	0.0475695	0.051997	0.047859	0.0471799	0.0496138	0.0546712	0.0508412	0.0539087	0.0511285	0.0526494	0.0493659	0.0496125	0.050325	0.0506153	0.0524789	0.0509699	0.0514109	0.0475219	0.0497795	0.048958	0.0513392	0.0478767	0.0507942	0.0470172	0.0532588	0.0515197	0.0490638	0.0497962	0.0508953	0.0486915	0.0490775	0.0501557	0.0531177	0.0527036
104.974		0.050171	0.0521495	0.0451395	0.0467664	0.0492544	0.0485795	0.0509209	0.0498834	0.0475324	0.050731	0.0511434	0.0506196	0.0474733	0.0476788	0.0474723	0.0512372	0.0472231	0.0467151	0.0494294	0.0541068	0.0500691	0.0538994	0.050941	0.0520093	0.0489944	0.0490552	0.0505432	0.0504302	0.052256	0.0501023	0.0501892	0.0474482	0.0495692	0.0487404	0.0506018	0.0474748	0.0505887	0.0470334	0.053393	0.0504128	0.0485558	0.0496366	0.0503787	0.0488849	0.0490606	0.0493081	0.0529225	0.0521549
105.376		0.0496549	0.0521791	0.044955	0.046017	0.0485188	0.0483918	0.0502202	0.0496876	0.0465008	0.0502816	0.0510565	0.0502899	0.0466539	0.047754	0.0474868	0.0504476	0.0466511	0.0464008	0.0494973	0.0534295	0.0493517	0.0538295	0.0505445	0.0514243	0.0485974	0.0485708	0.050687	0.0503233	0.0520921	0.0492464	0.0490714	0.0474088	0.049372	0.0486659	0.0500537	0.0472635	0.0504527	0.0471424	0.0533659	0.0491727	0.0480785	0.0493385	0.0498815	0.0493618	0.0491871	0.0483991	0.05282	0.0515436
105.778		0.0491491	0.0521922	0.0447694	0.0451401	0.0476505	0.0482912	0.0496702	0.0495566	0.0453601	0.0496245	0.0507188	0.0499905	0.0457714	0.0479942	0.0475321	0.049643	0.0461232	0.0462246	0.049744	0.0526119	0.0486227	0.0536603	0.0498422	0.0508636	0.0481288	0.048118	0.0506197	0.0502806	0.0519533	0.0483668	0.0480606	0.047345	0.0491721	0.0486563	0.0497787	0.047195	0.0502272	0.0472717	0.0530764	0.0477767	0.0475863	0.0487398	0.0494428	0.0500269	0.049339	0.0474308	0.0527398	0.0508756
106.18		0.0486253	0.0521087	0.044572	0.0441142	0.0465876	0.0482009	0.0492241	0.0494352	0.044112	0.0487749	0.0500862	0.0496901	0.044882	0.0482866	0.0475302	0.0488372	0.0456113	0.0461553	0.0500567	0.0516457	0.047786	0.0533707	0.0487887	0.0502779	0.0475557	0.0476579	0.0502543	0.05027	0.0518157	0.0474326	0.0471534	0.0471805	0.0489571	0.0486127	0.0498052	0.0472031	0.0497672	0.0473294	0.0524335	0.0462139	0.0470522	0.0477178	0.0491132	0.0507403	0.0494111	0.046419	0.0525938	0.0501644
106.583		0.0480926	0.0518556	0.0443615	0.0429661	0.0452961	0.0480482	0.0488116	0.0492565	0.0427868	0.0477973	0.0491445	0.049369	0.0440438	0.0484963	0.0474126	0.048041	0.0450942	0.0461399	0.0503077	0.0505371	0.0467443	0.0529544	0.0474161	0.0496094	0.0468847	0.047175	0.0495691	0.0502457	0.0516534	0.0464367	0.0463511	0.0468273	0.0487081	0.0484455	0.0501197	0.0472197	0.0489834	0.0472244	0.0514015	0.0444972	0.0464776	0.0462217	0.0489332	0.0513517	0.0493271	0.0454041	0.0522919	0.0494154
106.985		0.0475937	0.0513928	0.0441573	0.0417597	0.043788	0.0477832	0.0483567	0.0489609	0.0414449	0.0467962	0.047917	0.0490254	0.0433118	0.0485089	0.0471508	0.0472628	0.0445725	0.0461197	0.0503854	0.049321	0.0454352	0.0524264	0.0458448	0.0488109	0.0461557	0.0466944	0.0486305	0.0501562	0.0514533	0.0454137	0.0456801	0.0462179	0.0484091	0.0481213	0.0506495	0.0471913	0.0478692	0.0468869	0.050007	0.0426746	0.0458994	0.0442917	0.0489378	0.0517236	0.049055	0.0444394	0.0517736	0.0486275
107.387		0.0471833	0.0507222	0.0439914	0.0405883	0.0421325	0.0474109	0.047809	0.0485171	0.0401726	0.0458813	0.0464808	0.0486738	0.042732	0.0482684	0.0467505	0.0465146	0.0440592	0.0460373	0.0501961	0.0480599	0.0438629	0.0518062	0.0442419	0.0478611	0.0454514	0.0462731	0.0475797	0.0499524	0.0512049	0.0444434	0.0451856	0.0453264	0.0480458	0.0476617	0.0512805	0.0471022	0.046503	0.0462902	0.0483416	0.0408325	0.045382	0.0420555	0.0491289	0.0517698	0.0485987	0.0435766	0.0510394	0.0477877
107.789		0.0469144	0.0498773	0.0439312	0.0395364	0.0404565	0.0469673	0.0471608	0.0479489	0.0390711	0.0451419	0.0449558	0.0483462	0.0423414	0.0477917	0.0462588	0.0458169	0.0435944	0.0458636	0.049693	0.0468486	0.0421145	0.0511291	0.042807	0.0467719	0.0448583	0.0459746	0.0465911	0.0496005	0.0508999	0.0436344	0.0449234	0.0441766	0.0476079	0.0471665	0.0518586	0.0469792	0.0450221	0.0454799	0.0465576	0.0390852	0.0449991	0.0397042	0.0494868	0.0514579	0.0480064	0.0428562	0.0501361	0.0469046
108.191		0.0467957	0.0489327	0.0440278	0.0386545	0.03893	0.0465304	0.0464413	0.0473193	0.0382375	0.0445963	0.0434963	0.0480718	0.0421523	0.0471778	0.0457311	0.0452005	0.0432311	0.0455813	0.0488597	0.0457835	0.040348	0.0504176	0.0417038	0.0455941	0.0444524	0.0458452	0.0458341	0.0490894	0.0505134	0.0430697	0.0449134	0.042852	0.0470799	0.0467623	0.0522157	0.0468583	0.043576	0.0445586	0.0448138	0.03755	0.0447696	0.0374502	0.0499458	0.0508219	0.0473125	0.0422921	0.049167	0.0459901
108.594		0.0467913	0.0479723	0.0443201	0.0379492	0.0377337	0.0461608	0.0457163	0.0467329	0.0377412	0.0441907	0.0422539	0.0478494	0.0421501	0.0465555	0.045246	0.0447007	0.0430206	0.0452073	0.0477093	0.0449519	0.0387543	0.0496797	0.0410394	0.0443868	0.0442535	0.0458646	0.0454211	0.0484156	0.0500053	0.0427838	0.0451209	0.0414656	0.0464552	0.0465749	0.0521871	0.0467869	0.0422759	0.0436734	0.0432457	0.0363169	0.0446623	0.0354786	0.0504078	0.0499394	0.0465593	0.0418566	0.0482363	0.0450795
108.996		0.0468006	0.0470768	0.0447829	0.037356	0.0370154	0.0458988	0.0450604	0.0462736	0.0376006	0.0437926	0.0413375	0.0476426	0.0422714	0.04606	0.0448445	0.0443454	0.0429941	0.0447507	0.0462662	0.044398	0.0374996	0.0488939	0.0408123	0.0432065	0.0442186	0.0459558	0.0453487	0.0475879	0.0493168	0.0427276	0.045443	0.040131	0.0456976	0.0466729	0.0516337	0.0467571	0.0411595	0.0429642	0.0419253	0.0354267	0.0445533	0.0339109	0.0507392	0.0489086	0.045767	0.0414882	0.0474243	0.0442012
109.398		0.0466895	0.0462949	0.0453495	0.0367841	0.0368466	0.0457113	0.0445222	0.0459797	0.0377692	0.0432349	0.0407886	0.0473884	0.0424229	0.0457666	0.0445549	0.0441407	0.0431513	0.044231	0.0445793	0.04412	0.0366695	0.0480326	0.0409147	0.0420827	0.0442432	0.0459796	0.0455261	0.0466046	0.048392	0.0427827	0.0457	0.0389119	0.0447875	0.0470464	0.050452	0.0467179	0.0401858	0.0425219	0.0408354	0.0348681	0.0442792	0.0327904	0.0507887	0.0478105	0.0449254	0.0411324	0.0467553	0.0433968
109.8		0.0463227	0.045652	0.0458766	0.0361306	0.0371959	0.0455107	0.044096	0.0458155	0.0381363	0.0423492	0.0405646	0.0470153	0.0424956	0.0456554	0.0443738	0.0440605	0.0434539	0.0436447	0.0427142	0.0440671	0.0362327	0.0470449	0.0411515	0.0410145	0.0441987	0.0457993	0.0457869	0.045454	0.0471797	0.0427876	0.0456883	0.0378355	0.0437019	0.0475968	0.0486183	0.046545	0.0392584	0.0423581	0.039885	0.0345978	0.0436877	0.0320942	0.0504007	0.0467102	0.044013	0.0407559	0.0461997	0.0426718
110.202		0.0456	0.0451356	0.046189	0.0353305	0.0379298	0.0451721	0.0437242	0.0456905	0.0385428	0.0410435	0.040558	0.046473	0.0424208	0.0456019	0.0442855	0.0440458	0.0438397	0.0430021	0.0407737	0.0441522	0.0360427	0.0458965	0.0412753	0.0399684	0.043969	0.0453129	0.0459358	0.0441234	0.0456551	0.0426081	0.0452218	0.0368695	0.0424396	0.0481616	0.046194	0.0460958	0.0382688	0.0424053	0.0389552	0.0345754	0.0427051	0.0317614	0.0494569	0.0456379	0.0430226	0.0403702	0.045674	0.0420191
110.605		0.0444899	0.0447373	0.0461154	0.0343814	0.0388392	0.0445754	0.0433069	0.0454765	0.0388113	0.0393537	0.0406216	0.0457688	0.0421888	0.0454081	0.044272	0.044017	0.0442488	0.0423038	0.0389041	0.0442942	0.0358787	0.044579	0.0410592	0.0389077	0.0435174	0.0445322	0.0458053	0.0426039	0.0438449	0.0421874	0.0441989	0.0359608	0.0410369	0.0485502	0.0433368	0.0452384	0.037141	0.0425294	0.0379599	0.034797	0.0413842	0.0317282	0.0479168	0.0446178	0.0419577	0.040048	0.0450964	0.0413951
111.007		0.0430572	0.0444252	0.0455369	0.0333667	0.0396839	0.0436534	0.0427353	0.0450874	0.0387866	0.0374575	0.0406306	0.0449633	0.041886	0.044837	0.0443372	0.0438974	0.0446092	0.0415834	0.0372703	0.0444054	0.0355193	0.0431107	0.0403398	0.0377781	0.0428712	0.0435529	0.0453128	0.040914	0.0418219	0.0415895	0.0426236	0.0350762	0.0395766	0.048619	0.040289	0.0439198	0.0358634	0.0425988	0.0368765	0.0353106	0.0398933	0.0319548	0.0458387	0.0436852	0.0408361	0.0398944	0.0444017	0.0407692
111.409		0.0414414	0.0442027	0.0444155	0.0324356	0.0402419	0.0424278	0.0419526	0.0445055	0.03838	0.0356378	0.0405083	0.0441666	0.0416783	0.0437256	0.0445041	0.0436393	0.0448578	0.0408702	0.0360442	0.0444227	0.0348248	0.0415311	0.0390681	0.0365524	0.042132	0.0425758	0.0444609	0.0390997	0.0397109	0.040961	0.0406221	0.0342237	0.0381664	0.0482747	0.0373278	0.0421957	0.034499	0.0425168	0.0357768	0.0361999	0.0384783	0.0324397	0.0433879	0.0428884	0.0396607	0.0400038	0.0435632	0.0401097
111.811		0.0398276	0.0440708	0.0428284	0.0317844	0.0403562	0.0410031	0.0409892	0.0437977	0.0376069	0.0342052	0.0402677	0.0434941	0.0417607	0.0420064	0.0448173	0.0432447	0.0449343	0.0401943	0.0353261	0.0442894	0.0337999	0.0398812	0.0373204	0.0351992	0.0413948	0.0418056	0.0433527	0.0372411	0.0376726	0.0404935	0.0384085	0.0334919	0.0369512	0.0475018	0.0347142	0.0402445	0.0331722	0.0422604	0.0347816	0.0375363	0.0373699	0.0332157	0.0408109	0.0422757	0.0384304	0.0404331	0.042601	0.0394243
112.213		0.0383747	0.0440306	0.0409488	0.0315813	0.0399675	0.0395523	0.0399821	0.0430782	0.0365977	0.0334073	0.039974	0.0430157	0.0422915	0.0397698	0.0453325	0.042769	0.0447484	0.0395249	0.035119	0.043963	0.0326082	0.0381927	0.0352609	0.0337004	0.0407154	0.0414207	0.0421493	0.0354321	0.0358912	0.0403253	0.0362242	0.0330129	0.0360388	0.0463571	0.0325957	0.0383277	0.0320375	0.0418697	0.0339885	0.0393144	0.0366833	0.0343273	0.0383886	0.0418985	0.037101	0.0411543	0.0415709	0.0387348
112.616		0.0371476	0.0440375	0.0390041	0.031928	0.0391265	0.0382355	0.0391322	0.0424523	0.0355684	0.0333189	0.0397136	0.0427233	0.0433007	0.0372317	0.0460751	0.0423043	0.0442061	0.0387674	0.0352867	0.0433952	0.0315302	0.0364747	0.0331068	0.0320406	0.0400615	0.0414662	0.0410073	0.0337554	0.0345126	0.0405056	0.0342565	0.0329374	0.0354674	0.044952	0.0309973	0.0367478	0.0312396	0.0414411	0.0334348	0.0414021	0.0363683	0.0357947	0.0363449	0.0417479	0.0356204	0.0420614	0.0405062	0.0380944
113.018		0.0360926	0.0439922	0.0372131	0.0327843	0.0379774	0.0371514	0.0386505	0.0419467	0.0347538	0.0338435	0.0395236	0.0425111	0.0446532	0.0346953	0.0470322	0.0419462	0.0431997	0.0377736	0.0356022	0.0425532	0.0308771	0.034757	0.031069	0.0302234	0.0393142	0.0418461	0.0400247	0.032278	0.0336239	0.0409304	0.0326272	0.0333606	0.0351778	0.0434013	0.0298396	0.0357422	0.0308786	0.0410536	0.0330429	0.0435295	0.0362252	0.0375755	0.0348189	0.0417433	0.0339501	0.043018	0.039426	0.0375236
113.42		0.0350424	0.04373	0.0357287	0.0339858	0.0367192	0.0362831	0.0386514	0.0414549	0.0343253	0.0347031	0.0393491	0.0421988	0.046036	0.0324343	0.0480992	0.0417579	0.0416352	0.0363695	0.0357776	0.0414318	0.0308918	0.0330745	0.0293205	0.0282611	0.0383236	0.0423326	0.0392	0.0310047	0.0332224	0.041373	0.0313511	0.0342621	0.0350215	0.0418021	0.0289864	0.0354246	0.0309894	0.0407525	0.0326201	0.0453313	0.0359512	0.039538	0.0338025	0.0417324	0.032104	0.0438781	0.038308	0.0370275
113.822		0.0337722	0.0430321	0.0345828	0.0352701	0.03556	0.0355146	0.0391158	0.0407622	0.0343275	0.0355049	0.0390228	0.0415702	0.0470668	0.0306311	0.0490832	0.041743	0.0394989	0.0344422	0.0355572	0.0400485	0.03167	0.0315238	0.0279644	0.0262072	0.0369546	0.0426104	0.0384211	0.0299105	0.0331907	0.0415507	0.0303769	0.0354644	0.0347782	0.0402128	0.0283225	0.0357344	0.0315404	0.0405044	0.0319683	0.0464295	0.0352852	0.0414577	0.0331831	0.0415156	0.0301729	0.0445608	0.0370987	0.0365689
114.224		0.0320888	0.0416997	0.0336932	0.036374	0.0346825	0.0346879	0.0398367	0.0395962	0.0346582	0.0358499	0.0383007	0.0403975	0.0473963	0.0293119	0.0496982	0.0418351	0.0368675	0.0319995	0.0347927	0.0384675	0.0331221	0.0302218	0.0270493	0.0241506	0.0351498	0.0423504	0.0374733	0.0289292	0.0333181	0.0411806	0.0296184	0.0366454	0.0342245	0.038652	0.027795	0.0364163	0.0324461	0.0401889	0.030933	0.0465298	0.0340715	0.0430481	0.0327624	0.0409	0.0283158	0.0450646	0.0357375	0.0360777
114.627		0.0299273	0.0396058	0.0328529	0.0370675	0.0342254	0.0336779	0.0404913	0.0376995	0.0350971	0.0354667	0.0369347	0.0385307	0.0468284	0.0283453	0.0496033	0.0419062	0.0339531	0.029247	0.03348	0.0367593	0.03498	0.0292892	0.0265418	0.0222	0.0329605	0.0412922	0.0361088	0.0279891	0.0333361	0.0400845	0.0289867	0.0373949	0.0331767	0.0370987	0.027401	0.037072	0.0335847	0.0396723	0.0294829	0.0455035	0.0323578	0.044027	0.0323415	0.0397569	0.0267349	0.0454799	0.0341731	0.0354616
115.029		0.027395	0.0367617	0.0318219	0.037208	0.0342751	0.0324524	0.0407081	0.0349775	0.0353735	0.0342985	0.0347602	0.0358854	0.0453988	0.0275046	0.0485023	0.0417935	0.0310553	0.0265608	0.031785	0.0350243	0.0368478	0.0287738	0.0263628	0.0204831	0.0305409	0.0393093	0.0341064	0.027008	0.032962	0.0382397	0.0284503	0.03734	0.0315503	0.0355388	0.0271606	0.0372386	0.0348144	0.0388032	0.0277457	0.0434286	0.0303448	0.0442112	0.0317383	0.0380993	0.0256265	0.0459536	0.0323894	0.0346583
115.431		0.0247897	0.0333421	0.0304081	0.0367823	0.0348574	0.0310995	0.0402095	0.0315421	0.035253	0.0325614	0.0317908	0.0325227	0.0433734	0.0265721	0.0462226	0.041345	0.0285341	0.0244069	0.0300063	0.0333349	0.0382856	0.0285956	0.0263924	0.0191145	0.0281425	0.036412	0.031375	0.0259428	0.0319969	0.0358001	0.0280325	0.036258	0.0293755	0.0339581	0.0270824	0.0365279	0.0359858	0.0375176	0.0259614	0.040581	0.0283675	0.0436124	0.0308535	0.0360854	0.0251487	0.0466732	0.0304245	0.033658
115.833		0.0224735	0.0296475	0.0284992	0.0358329	0.0359225	0.0297916	0.0388871	0.0277712	0.0346175	0.0306725	0.0282338	0.0286345	0.041165	0.0254173	0.0428138	0.0404796	0.026678	0.0232004	0.0285041	0.0317547	0.0389169	0.0285463	0.026505	0.0181996	0.0260755	0.0327741	0.028005	0.0247977	0.0303851	0.0330753	0.0278179	0.0342529	0.0268051	0.0323934	0.0271354	0.0347114	0.0369571	0.0358272	0.0244188	0.0373768	0.0267395	0.0424923	0.0296513	0.0339981	0.0253728	0.0477378	0.0283634	0.0324983
116.235		0.0207626	0.0260416	0.0261602	0.0344963	0.037333	0.0287319	0.0368887	0.0241726	0.0335113	0.029145	0.0244881	0.0245665	0.0392428	0.0240446	0.0386084	0.0392434	0.0256682	0.0231507	0.0275598	0.0302986	0.0385325	0.0283628	0.0266085	0.0177872	0.0246592	0.0287023	0.0243104	0.023642	0.0282825	0.0304612	0.0279222	0.0317224	0.0240687	0.0308928	0.0272414	0.0318508	0.0376175	0.03387	0.0233825	0.0342793	0.0257069	0.0413329	0.0281772	0.0321614	0.0263058	0.0491611	0.0263698	0.0312907
116.638		0.0198038	0.0228664	0.0235845	0.0329298	0.0388732	0.028057	0.0345846	0.0212808	0.0321291	0.0283997	0.0210052	0.0207264	0.0379672	0.022584	0.0341584	0.0378336	0.02549	0.0241717	0.0272985	0.0289877	0.0371572	0.0278325	0.026663	0.0178942	0.0241735	0.0246168	0.0207167	0.0225898	0.0260514	0.0283206	0.0284149	0.0292987	0.0214362	0.029526	0.0273247	0.0282535	0.0379189	0.0318545	0.0229975	0.0316956	0.0253606	0.0407125	0.0265107	0.0308098	0.027853	0.0507602	0.0246056	0.0301703
117.04		0.0195883	0.0203797	0.021026	0.0313028	0.0402954	0.0278047	0.0324166	0.0194418	0.0307432	0.0286239	0.0182001	0.0174923	0.0375285	0.0211982	0.0301042	0.036559	0.0259498	0.0259571	0.0276425	0.0278152	0.0350449	0.0268774	0.0266817	0.0184651	0.0247837	0.020948	0.0176511	0.0217885	0.0241551	0.0268773	0.0293048	0.0275758	0.0191346	0.0283343	0.027326	0.0244063	0.0379085	0.0300274	0.0232986	0.0298876	0.0256474	0.0411191	0.0247559	0.0299703	0.0298421	0.0522044	0.0232391	0.0292689
117.442		0.0199664	0.0186489	0.0187482	0.0297349	0.0414006	0.0279027	0.0307485	0.0187729	0.0295931	0.0297929	0.0163093	0.0151019	0.03789	0.0200342	0.0269439	0.0357407	0.0267318	0.0280413	0.0283603	0.0267839	0.0325978	0.0256273	0.0267308	0.0193981	0.02652	0.0180343	0.0153859	0.0213602	0.0229953	0.0261275	0.0304972	0.0269274	0.01728	0.0273032	0.027256	0.0208048	0.0377356	0.0285543	0.0241778	0.0289242	0.0264016	0.0427647	0.0230016	0.0294727	0.032028	0.0530142	0.0223171	0.0286441
117.844		0.0207786	0.0175949	0.0169407	0.0283157	0.0421149	0.0281979	0.0297019	0.0191909	0.0287873	0.0316299	0.0153509	0.0136132	0.0388229	0.0191343	0.024927	0.0355954	0.0275383	0.0300198	0.0291156	0.0258961	0.0302428	0.0243597	0.0268857	0.0205419	0.0292308	0.0159967	0.0139963	0.0213495	0.0227683	0.0258824	0.0318194	0.0273334	0.0158861	0.0263425	0.0271777	0.0178197	0.0376176	0.0274887	0.0254189	0.0286903	0.0273826	0.0454651	0.0213337	0.0289799	0.0341241	0.0526926	0.0217736	0.0283023
118.246		0.0219174	0.0170015	0.0157144	0.0270536	0.0425167	0.0285145	0.0291879	0.0204704	0.0282627	0.033776	0.0151471	0.0129308	0.040005	0.0184618	0.0239858	0.0361611	0.0281319	0.0316239	0.0295874	0.0251679	0.0283155	0.0234178	0.0272259	0.0217508	0.0326102	0.0147347	0.0133485	0.0217284	0.0234065	0.0257965	0.0330577	0.0284284	0.014893	0.0253281	0.0271771	0.0156275	0.0377661	0.0267388	0.026698	0.028949	0.0283591	0.0486381	0.0198535	0.028159	0.0358573	0.0508164	0.0214636	0.0281895
118.649		0.0233657	0.0165798	0.0151135	0.025948	0.0427933	0.02873	0.0289518	0.022328	0.0278219	0.0358641	0.0153855	0.0128446	0.0410548	0.017921	0.0238142	0.0372955	0.0284521	0.0328228	0.0294908	0.0246065	0.0269901	0.0230999	0.027825	0.0229221	0.0362282	0.0139433	0.0132109	0.0223662	0.024583	0.0255039	0.0340555	0.0296644	0.0142211	0.0241461	0.027331	0.0142255	0.0383094	0.0261204	0.0276867	0.029436	0.0291398	0.0514359	0.0186807	0.026788	0.0370271	0.0472215	0.0212066	0.0282636
119.051		0.0251869	0.0160616	0.0151749	0.0249434	0.0431461	0.0287847	0.0287311	0.0245008	0.0272217	0.0376293	0.0157139	0.0130979	0.0416873	0.0174218	0.0239748	0.0387344	0.0285788	0.0337516	0.028694	0.0242448	0.0262647	0.0235787	0.0287593	0.0240327	0.0396036	0.0132949	0.0133593	0.0230523	0.0259021	0.0247347	0.0347552	0.0304674	0.013822	0.0227317	0.0277215	0.0134987	0.0392441	0.0254091	0.0281295	0.0299475	0.029577	0.0529831	0.0179705	0.0248551	0.0375449	0.0420534	0.0208998	0.0284538
119.453		0.027471	0.0152308	0.0159179	0.024032	0.0436825	0.0286725	0.0283332	0.0267755	0.0262714	0.0389807	0.0158699	0.0134467	0.0416819	0.0168966	0.024041	0.0401783	0.0287385	0.0346706	0.027172	0.0241231	0.0259938	0.0248594	0.0301056	0.02516	0.0422421	0.0125504	0.0136895	0.0235611	0.0270449	0.0234092	0.0352361	0.0304332	0.0136935	0.0211036	0.0284243	0.0133313	0.0404283	0.024441	0.0279365	0.0303925	0.0295704	0.0526344	0.017898	0.0225732	0.037487	0.0358576	0.0205694	0.028745
119.855		0.0302761	0.0139963	0.0173652	0.023217	0.0443322	0.0284924	0.0276953	0.0289866	0.0249067	0.0400179	0.0157515	0.0137182	0.0409814	0.0163622	0.023674	0.0413774	0.0291869	0.0357829	0.0250653	0.0242772	0.0259541	0.0268096	0.0319378	0.0264572	0.0437231	0.011672	0.0142396	0.0236771	0.0278883	0.0216737	0.0357182	0.0293972	0.0138706	0.0193472	0.0294942	0.0136356	0.0416106	0.0231247	0.0272818	0.0307941	0.0291252	0.0501531	0.0186192	0.0203175	0.0370126	0.0294784	0.0204066	0.0291175
120.257		0.0335748	0.0124031	0.0195407	0.0225426	0.0448184	0.0283647	0.0268799	0.0310829	0.0232292	0.0410059	0.0154247	0.013844	0.0396281	0.0158718	0.0226961	0.0421922	0.030149	0.037199	0.0226059	0.0247647	0.0259344	0.0291965	0.0343411	0.0280923	0.0437785	0.0108628	0.0151961	0.0232772	0.0286051	0.0199123	0.0364621	0.0274538	0.0144018	0.0176018	0.0310096	0.0144022	0.0424841	0.0214822	0.0265362	0.0312495	0.028293	0.0457523	0.0201966	0.0184838	0.0363472	0.0238971	0.020726	0.029594
[truncated: 12 more columns]
