# Supplementary material
Source: MDPI journal article supplement (https://www.mdpi.com/2073-4441/13/11/1475)
Supplement: s1 [file s1 › Supplementary files/S2_1_25122018_File.xls]

## Sheet: Refraction
	Sample No.	1	2	3	4	5	6	7	8	9	10	11	12	13	14	15	16	17	18	19	20	21	22	23	24	25	26	27	28	29	30	31	32	33	34	35	36	37	38	39	40	41	42	43	44	45	К1	К2	К3
	Preparation	ANLG	LYD	LYD	LYD	EUF	EUF	LYD	ANLG	EUF	EUF	EUF	EUF	LYD	ANLG	LYD	ANLG	EUF	EUF	LYD	EUF	ANLG	LYD	ANLG	LYD	ANLG	LYD	ANLG	LYD	EUF	EUF	ANLG	ANLG	ANLG	LYD	ANLG	EUF	ANLG	LYD	EUF	ANLG	ANLG	LYD	LYD	EUF	EUF	K	K	K
Wavelength, cm-1		Refractive Index
1.2066		4.14082	4.08624	4.29964	4.64004	4.20608	4.3902	4.66548	4.2674	4.32681	4.16693	4.99812	4.36288	4.02738	4.31471	4.73993	4.44676	4.34088	4.2477	4.39102	4.45327	4.74893	4.81986	4.53167	5.07436	4.57547	4.54924	4.46002	4.52803	4.81453	4.59507	4.44336	4.45014	4.37523	4.41251	4.14324	4.24226	3.93466	5.01312	4.60217	4.3729	4.35379	4.58445	4.4279	4.27626	4.16401	4.22109	4.35745	4.67771
1.60879		3.57962	3.52919	3.63664	3.81603	3.64612	3.71075	3.83374	3.63772	3.67082	3.58494	4.08304	3.6852	3.49162	3.65149	3.96923	3.72544	3.64017	3.63612	3.66518	3.70267	3.8613	3.88852	3.77298	4.26886	3.80281	3.78726	3.71128	3.76718	3.8789	3.79033	3.72761	3.73725	3.70264	3.70177	3.57677	3.61934	3.44428	4.10406	3.79212	3.67361	3.66279	3.80674	3.72445	3.64289	3.59034	3.61578	3.65661	3.83985
2.01099		3.28747	3.23943	3.29996	3.40256	3.34374	3.36329	3.41671	3.31373	3.33927	3.27951	3.61108	3.34055	3.21618	3.31319	3.55918	3.35871	3.28351	3.32208	3.30249	3.32337	3.41661	3.42852	3.39292	3.81852	3.4085	3.40651	3.33257	3.38334	3.41838	3.38956	3.36247	3.37134	3.35678	3.33598	3.28348	3.29955	3.18921	3.62577	3.38948	3.31785	3.30808	3.40756	3.36901	3.31784	3.28911	3.30337	3.30092	3.416
2.41319		3.11224	3.06664	3.10725	3.16735	3.15497	3.16159	3.18088	3.12321	3.14881	3.09629	3.33241	3.14121	3.05371	3.11711	3.30872	3.14682	3.07698	3.13709	3.09832	3.10745	3.16456	3.17299	3.17593	3.52586	3.18126	3.18995	3.11611	3.16398	3.16314	3.1635	3.152	3.15837	3.15514	3.12334	3.11033	3.11172	3.03778	3.33877	3.16282	3.11335	3.10187	3.17526	3.16442	3.12787	3.10837	3.11903	3.09705	3.17603
2.81539		2.99591	2.95277	2.98667	3.02039	3.02428	3.03297	3.03504	2.9994	3.02856	2.97502	3.15066	3.01451	2.94775	2.99222	3.13969	3.01224	2.94524	3.01668	2.97268	2.97282	3.00789	3.01816	3.0396	3.3158	3.03781	3.05459	2.98052	3.02653	3.00867	3.02377	3.01903	3.02224	3.02608	2.98775	2.99785	2.98993	2.93832	3.14901	3.02268	2.98449	2.97045	3.02668	3.035	3.00558	2.98867	2.99904	2.969	3.02822
3.21759		2.91303	2.87216	2.90597	2.92169	2.92736	2.94504	2.93843	2.91274	2.94709	2.88888	3.02339	2.92823	2.87346	2.90692	3.01756	2.92052	2.8548	2.9325	2.88979	2.88262	2.90329	2.91777	2.9476	3.15588	2.94078	2.96381	2.88944	2.93422	2.90844	2.93122	2.929	2.92899	2.93756	2.89498	2.91964	2.90505	2.86786	3.01454	2.92936	2.89738	2.88088	2.9246	2.94734	2.92102	2.90357	2.9152	2.88272	2.93112
3.61979		2.85117	2.81223	2.84915	2.85163	2.85239	2.88182	2.87095	2.84871	2.88894	2.82465	2.9299	2.8665	2.81875	2.84564	2.92537	2.85467	2.78917	2.87065	2.83203	2.81861	2.82943	2.84904	2.88214	3.03041	2.87166	2.89963	2.8249	2.86893	2.8396	2.8666	2.86483	2.8618	2.87375	2.82805	2.8627	2.84279	2.81513	2.91461	2.86344	2.83527	2.8168	2.85064	2.88498	2.85947	2.84002	2.85366	2.82141	2.8641
4.02199		2.80367	2.76626	2.80767	2.79983	2.79314	2.83476	2.8219	2.79964	2.84591	2.77522	2.85927	2.82087	2.77719	2.80006	2.85404	2.80562	2.73963	2.82374	2.79008	2.77112	2.77501	2.79993	2.8338	2.93094	2.82053	2.8525	2.77734	2.82102	2.79014	2.81973	2.81741	2.81171	2.82616	2.77792	2.82004	2.79555	2.77421	2.83811	2.81476	2.78927	2.76943	2.79502	2.83913	2.81306	2.79101	2.80702	2.77614	2.81612
4.42418		2.76666	2.73043	2.77667	2.76055	2.74601	2.79901	2.78528	2.76121	2.81334	2.73653	2.80531	2.7865	2.74516	2.76547	2.79831	2.76825	2.70128	2.78752	2.75876	2.73479	2.73372	2.76376	2.79727	2.85242	2.78177	2.81704	2.74139	2.78503	2.75344	2.78491	2.7816	2.77359	2.78998	2.73945	2.78763	2.75902	2.74182	2.77863	2.77772	2.75434	2.73372	2.75221	2.80477	2.77734	2.75254	2.77103	2.74193	2.78096
4.82638		2.73776	2.7024	2.7533	2.73041	2.7088	2.77165	2.7576	2.73086	2.78845	2.70609	2.76424	2.7605	2.72048	2.73902	2.75491	2.73948	2.67126	2.75943	2.73505	2.70652	2.70193	2.73668	2.76941	2.79142	2.75205	2.79002	2.71391	2.75773	2.72573	2.75878	2.75437	2.74438	2.76229	2.70962	2.76296	2.73059	2.71604	2.73228	2.74916	2.72756	2.70661	2.71894	2.77883	2.74965	2.72215	2.74312	2.71585	2.75492
5.22858		2.71538	2.6807	2.73578	2.70739	2.68003	2.7508	2.73671	2.70701	2.76946	2.68232	2.73352	2.74101	2.70176	2.71894	2.72166	2.7174	2.64783	2.73778	2.71715	2.68453	2.67749	2.71635	2.74823	2.7454	2.72932	2.76942	2.69296	2.73709	2.70478	2.73921	2.73382	2.72211	2.74124	2.68656	2.74437	2.70862	2.69571	2.69653	2.72716	2.70714	2.68615	2.6932	2.75935	2.7283	2.6983	2.72162	2.69613	2.73568
5.63078		2.69838	2.66431	2.72298	2.6902	2.65864	2.73519	2.72124	2.68864	2.75511	2.66418	2.71128	2.72674	2.68803	2.70402	2.69701	2.70076	2.62992	2.72141	2.7039	2.66774	2.6591	2.70127	2.73237	2.71226	2.71225	2.75388	2.67731	2.72177	2.68922	2.72478	2.71871	2.70548	2.72559	2.66906	2.73063	2.69199	2.68007	2.66971	2.71052	2.69192	2.671	2.67371	2.74497	2.71218	2.67994	2.7054	2.68161	2.72173
6.03298		2.68587	2.6525	2.71411	2.6779	2.64375	2.72383	2.71023	2.67499	2.74444	2.65093	2.69592	2.71668	2.67856	2.69338	2.67977	2.68867	2.61682	2.70944	2.69447	2.6555	2.64594	2.69032	2.72081	2.69011	2.69995	2.74237	2.66612	2.71079	2.67807	2.71437	2.70816	2.69349	2.71439	2.65628	2.72075	2.67983	2.66853	2.6506	2.69837	2.68112	2.66018	2.65959	2.73462	2.70045	2.66635	2.69359	2.6715	2.71193
6.43518		2.67709	2.64465	2.70854	2.66973	2.63459	2.7159	2.70292	2.66548	2.7366	2.64201	2.68594	2.70999	2.67271	2.68629	2.66893	2.68043	2.608	2.7011	2.68821	2.64735	2.63745	2.6826	2.7127	2.67711	2.69175	2.73406	2.65871	2.70337	2.67057	2.70703	2.70143	2.68532	2.70686	2.6476	2.7138	2.67144	2.66064	2.63827	2.68997	2.67412	2.6529	2.65017	2.72742	2.69245	2.65695	2.68548	2.66513	2.70535
6.83738		2.67131	2.64014	2.70567	2.66497	2.63033	2.71062	2.6986	2.65958	2.73073	2.63693	2.67985	2.70581	2.66983	2.68207	2.66354	2.67541	2.60295	2.69565	2.68447	2.64291	2.63312	2.6772	2.7072	2.6714	2.68704	2.72811	2.65447	2.69879	2.66599	2.70181	2.69781	2.68019	2.70225	2.64245	2.70888	2.66608	2.65588	2.63192	2.6846	2.67034	2.64842	2.64488	2.7225	2.68754	2.65124	2.68038	2.66187	2.70111
7.23958		2.66775	2.63831	2.70482	2.66282	2.63006	2.70717	2.6965	2.6567	2.72599	2.63513	2.67616	2.70322	2.66922	2.68	2.66259	2.67295	2.60113	2.69229	2.68254	2.64175	2.63238	2.67323	2.70345	2.67103	2.68518	2.72372	2.65274	2.69629	2.66353	2.69778	2.69652	2.67726	2.69974	2.64022	2.70502	2.66295	2.65369	2.63067	2.68145	2.66912	2.64599	2.64308	2.71898	2.68501	2.6487	2.67757	2.66101	2.69829
7.64178		2.66559	2.63835	2.70515	2.66234	2.63266	2.70471	2.69579	2.65615	2.72148	2.63592	2.6734	2.70123	2.6701	2.67927	2.66494	2.67229	2.60179	2.69013	2.68162	2.64324	2.63447	2.66974	2.70056	2.67394	2.68539	2.72001	2.65275	2.69507	2.66233	2.69396	2.69669	2.67561	2.69841	2.6402	2.70124	2.66114	2.65337	2.63351	2.67964	2.66968	2.64475	2.64398	2.71597	2.68407	2.64867	2.67626	2.6617	2.69592
8.04397		2.66394	2.63927	2.70562	2.66251	2.63678	2.70234	2.69549	2.65708	2.7164	2.63839	2.67028	2.6988	2.67158	2.67898	2.66924	2.67254	2.604	2.6882	2.68081	2.6465	2.6384	2.66582	2.69763	2.67802	2.68668	2.71614	2.65361	2.69424	2.66146	2.68948	2.69734	2.67425	2.69724	2.64146	2.69658	2.65967	2.65407	2.63914	2.67822	2.67106	2.6438	2.6466	2.7126	2.68379	2.65036	2.67555	2.66292	2.69299
8.44617		2.66195	2.64	2.70507	2.66226	2.64093	2.69923	2.69461	2.65849	2.71004	2.64143	2.66578	2.69492	2.67275	2.67821	2.67401	2.67271	2.60665	2.68553	2.6792	2.65039	2.64298	2.66068	2.69383	2.68131	2.68794	2.71136	2.65437	2.69289	2.66003	2.68359	2.69745	2.67216	2.69514	2.64292	2.69024	2.65754	2.65481	2.64596	2.67627	2.67217	2.64219	2.64974	2.7081	2.68318	2.65276	2.67452	2.66355	2.68857
8.84837		2.65886	2.63944	2.70232	2.66062	2.64357	2.69471	2.69226	2.65933	2.70199	2.64377	2.65932	2.6888	2.6728	2.67607	2.67774	2.67183	2.60855	2.68129	2.67596	2.65358	2.64694	2.65379	2.6885	2.68217	2.68799	2.70509	2.65413	2.6902	2.65726	2.67585	2.69612	2.66847	2.69114	2.64339	2.68171	2.65391	2.65458	2.65218	2.673	2.67193	2.63908	2.65212	2.70195	2.6813	2.65482	2.67232	2.66252	2.68194
9.25057		2.65414	2.63669	2.69645	2.65689	2.64343	2.68837	2.68778	2.65864	2.6921	2.64422	2.65073	2.68001	2.67108	2.67192	2.67913	2.66906	2.60865	2.67489	2.6705	2.65475	2.64911	2.64495	2.68128	2.67951	2.68581	2.69706	2.65217	2.68558	2.65263	2.66613	2.69268	2.6626	2.68453	2.64179	2.67089	2.64822	2.65251	2.65608	2.66788	2.66941	2.63388	2.65258	2.6939	2.67742	2.65551	2.66829	2.65897	2.67271
9.65277		2.64754	2.63123	2.68698	2.65068	2.63967	2.68011	2.68086	2.65568	2.68053	2.64187	2.64026	2.66855	2.66728	2.66543	2.6773	2.66389	2.60618	2.66612	2.66257	2.6529	2.64867	2.63427	2.67211	2.67293	2.68075	2.68726	2.64805	2.67874	2.64593	2.65464	2.68681	2.65432	2.67502	2.63734	2.65806	2.64023	2.648	2.65632	2.66067	2.66407	2.62634	2.65024	2.68405	2.67114	2.65404	2.66208	2.65245	2.66093
10.055		2.63908	2.62296	2.67401	2.642	2.63211	2.67014	2.6716	2.65011	2.66768	2.6363	2.6284	2.65482	2.66136	2.65661	2.67194	2.6562	2.6008	2.65515	2.65231	2.64752	2.6452	2.62216	2.66122	2.66269	2.67265	2.67596	2.64167	2.66973	2.63723	2.64184	2.67858	2.64382	2.66279	2.62975	2.64384	2.63009	2.64086	2.65219	2.65146	2.65581	2.61657	2.64474	2.67274	2.66244	2.64998	2.6537	2.64299	2.64701
10.4572		2.62902	2.61221	2.6582	2.63116	2.62114	2.6589	2.6604	2.642	2.65406	2.62758	2.61576	2.63952	2.65355	2.64582	2.66327	2.64621	2.5926	2.64241	2.64016	2.63868	2.63873	2.60913	2.64903	2.64955	2.66181	2.66357	2.63321	2.6589	2.62685	2.62826	2.66834	2.63158	2.64841	2.61922	2.62895	2.61818	2.63127	2.6437	2.64056	2.64497	2.60501	2.6362	2.66045	2.65165	2.64331	2.64341	2.63102	2.63165
10.8594		2.61775	2.59959	2.64055	2.61867	2.60756	2.64687	2.64782	2.63172	2.64015	2.61623	2.60292	2.62348	2.64423	2.63357	2.65193	2.63441	2.58199	2.62851	2.62673	2.62695	2.62964	2.59571	2.63603	2.63454	2.64887	2.65056	2.62306	2.64677	2.6152	2.61446	2.65662	2.61824	2.63268	2.60638	2.6141	2.60508	2.61972	2.63149	2.62842	2.63217	2.59223	2.62512	2.64769	2.63933	2.63432	2.63169	2.61729	2.61564
11.2616		2.60567	2.58586	2.62219	2.60513	2.59238	2.63448	2.63448	2.61981	2.62638	2.60304	2.59034	2.60745	2.63384	2.62045	2.63875	2.62142	2.56958	2.61407	2.61268	2.61318	2.61852	2.58236	2.62271	2.61873	2.63462	2.63735	2.61169	2.63388	2.60277	2.60087	2.644	2.60443	2.61645	2.59203	2.59984	2.59134	2.60683	2.6166	2.61555	2.61817	2.57884	2.61223	2.63488	2.62609	2.62353	2.61906	2.6026	2.5997
11.6638		2.59319	2.57171	2.60414	2.59109	2.57661	2.62207	2.62089	2.60689	2.61306	2.58883	2.57831	2.59205	2.6228	2.607	2.6246	2.60783	2.55607	2.59965	2.59857	2.59829	2.60607	2.56937	2.60945	2.60306	2.61981	2.62429	2.59959	2.62075	2.58999	2.58778	2.63099	2.59066	2.60046	2.577	2.5865	2.57748	2.59322	2.60021	2.60242	2.6037	2.56536	2.59831	2.62232	2.61249	2.61152	2.60601	2.58772	2.58439
12.066		2.58061	2.55775	2.58718	2.57701	2.56108	2.60981	2.60744	2.59346	2.60034	2.57433	2.56699	2.57769	2.61144	2.59362	2.61021	2.59415	2.54209	2.58565	2.58485	2.58313	2.59294	2.55692	2.59653	2.58822	2.60508	2.61158	2.58718	2.60774	2.5772	2.57532	2.61798	2.57729	2.58524	2.56199	2.57418	2.56389	2.57942	2.58342	2.5894	2.58935	2.55217	2.58404	2.61017	2.59899	2.59882	2.59292	2.57323	2.57006
12.4682		2.56817	2.54436	2.57179	2.56323	2.54638	2.59776	2.59437	2.57995	2.58824	2.56009	2.55639	2.56453	2.60002	2.58058	2.59615	2.58075	2.52818	2.57229	2.57177	2.56833	2.57968	2.54502	2.58408	2.5746	2.59086	2.59933	2.57479	2.59512	2.56463	2.56348	2.60523	2.56452	2.5711	2.5475	2.56283	2.55081	2.56579	2.5671	2.57678	2.57554	2.5395	2.56994	2.59849	2.58588	2.58587	2.58005	2.55951	2.55687
12.8704		2.55599	2.53176	2.55815	2.54994	2.53282	2.58591	2.58178	2.5666	2.5767	2.54647	2.54642	2.55255	2.58867	2.56802	2.58275	2.56783	2.5147	2.55968	2.55943	2.55429	2.56669	2.53362	2.57213	2.56228	2.57738	2.58752	2.56265	2.58298	2.55245	2.55218	2.59285	2.55237	2.55813	2.53383	2.55229	2.53834	2.55258	2.55185	2.56471	2.56249	2.52741	2.55636	2.58722	2.57333	2.57301	2.56756	2.54675	2.54477
13.2726		2.54414	2.52	2.5462	2.5372	2.52045	2.5742	2.56967	2.55356	2.56559	2.53362	2.53691	2.54155	2.57748	2.55597	2.57015	2.55548	2.50188	2.54775	2.54781	2.54119	2.55422	2.52258	2.56063	2.55109	2.56473	2.57608	2.55088	2.57135	2.5407	2.54123	2.58086	2.54078	2.54627	2.52108	2.5423	2.52644	2.53988	2.53795	2.55325	2.55025	2.51589	2.54346	2.57627	2.56134	2.56042	2.55546	2.53492	2.5336
13.6748		2.53261	2.50898	2.53565	2.52497	2.50915	2.56256	2.55798	2.54089	2.55474	2.52154	2.52768	2.53123	2.56645	2.54436	2.55833	2.54367	2.48978	2.53636	2.53675	2.52903	2.54236	2.51177	2.54946	2.54068	2.55282	2.5649	2.53951	2.56014	2.52936	2.53047	2.56919	2.52962	2.5353	2.50918	2.53263	2.515	2.52769	2.5254	2.54237	2.53873	2.50483	2.53125	2.56554	2.54986	2.54821	2.54375	2.5239	2.52311
14.077		2.52139	2.49854	2.52612	2.51315	2.49861	2.55096	2.5466	2.52856	2.54403	2.51013	2.51855	2.52127	2.55558	2.53311	2.54715	2.53231	2.47834	2.52534	2.52609	2.51766	2.53107	2.50107	2.53851	2.53064	2.54151	2.55386	2.52851	2.54926	2.51837	2.51975	2.55775	2.51874	2.52498	2.49798	2.52304	2.50389	2.51594	2.51403	2.53196	2.52776	2.49408	2.51964	2.55493	2.53879	2.53641	2.53234	2.51346	2.51304
14.4792		2.51041	2.48845	2.51717	2.50162	2.48852	2.53938	2.53545	2.51654	2.53335	2.49921	2.50936	2.51134	2.54482	2.5221	2.53643	2.52127	2.46744	2.5145	2.51562	2.50687	2.52026	2.49039	2.52766	2.52059	2.53062	2.54286	2.51782	2.53857	2.50765	2.50895	2.54644	2.50798	2.51501	2.4873	2.51337	2.49295	2.50455	2.5035	2.5219	2.51716	2.48351	2.50849	2.54436	2.52798	2.52498	2.52115	2.50336	2.50313
14.8814		2.49964	2.47852	2.50839	2.49028	2.47855	2.52786	2.52445	2.50478	2.52266	2.48861	2.50002	2.50124	2.53417	2.51125	2.52598	2.51043	2.45692	2.50371	2.50518	2.49644	2.50977	2.47971	2.51685	2.51024	2.51997	2.53188	2.50736	2.528	2.49713	2.49805	2.5352	2.49726	2.50516	2.47693	2.50353	2.48207	2.49342	2.49347	2.51207	2.50673	2.47302	2.49765	2.53381	2.51733	2.51391	2.51012	2.49338	2.49319
15.2836		2.48904	2.46863	2.49946	2.47904	2.46847	2.51647	2.51356	2.49325	2.51196	2.47819	2.49049	2.49084	2.52363	2.50051	2.51564	2.49972	2.44666	2.49291	2.49467	2.48616	2.49947	2.46903	2.50604	2.49947	2.50945	2.52091	2.49706	2.51747	2.48675	2.48707	2.524	2.48654	2.49524	2.4667	2.4935	2.47122	2.4825	2.4836	2.50236	2.49634	2.46256	2.48699	2.52329	2.50677	2.50314	2.49921	2.48335	2.48309
15.6858		2.47859	2.45868	2.49015	2.4679	2.45816	2.50527	2.50278	2.48194	2.50131	2.46786	2.48079	2.48012	2.5132	2.48986	2.50533	2.48909	2.43653	2.48207	2.48406	2.47591	2.48926	2.45841	2.49526	2.48833	2.49896	2.51	2.48689	2.50697	2.47647	2.47609	2.51286	2.47581	2.48514	2.45652	2.48334	2.46038	2.47175	2.47368	2.49271	2.48592	2.45211	2.47644	2.51285	2.49627	2.49265	2.48842	2.47321	2.47278
16.088		2.46829	2.44866	2.48039	2.45688	2.44761	2.49434	2.49214	2.47088	2.49076	2.45756	2.47096	2.46917	2.50291	2.47932	2.49502	2.47853	2.4265	2.47126	2.47337	2.46563	2.47909	2.4479	2.48455	2.47694	2.48851	2.4992	2.47681	2.49652	2.46628	2.46517	2.50183	2.46513	2.47485	2.44632	2.4731	2.44961	2.46117	2.46356	2.48308	2.47546	2.44171	2.46597	2.50252	2.48584	2.48242	2.47776	2.46294	2.46229
16.4901		2.45814	2.43863	2.47019	2.446	2.43689	2.48374	2.48166	2.46007	2.48038	2.44731	2.46109	2.45811	2.4928	2.46891	2.48473	2.46808	2.41655	2.46053	2.46267	2.45532	2.46895	2.43755	2.47397	2.46549	2.47812	2.4886	2.46683	2.48616	2.45621	2.45443	2.49097	2.45455	2.4644	2.43613	2.46289	2.43898	2.45077	2.45325	2.47347	2.46499	2.4314	2.4556	2.49236	2.47551	2.47243	2.46726	2.4526	2.4517
16.8923		2.44815	2.42864	2.45966	2.43535	2.42612	2.47348	2.47139	2.44956	2.47022	2.43714	2.45123	2.44709	2.48287	2.45867	2.47453	2.45778	2.40671	2.44996	2.45205	2.44503	2.45888	2.42741	2.46357	2.45418	2.46783	2.47823	2.45697	2.47594	2.44625	2.44392	2.48034	2.44413	2.45387	2.42597	2.45279	2.42855	2.44059	2.44281	2.46389	2.4546	2.42124	2.44537	2.48238	2.46533	2.46269	2.45697	2.44227	2.44109
17.2945		2.43833	2.41877	2.44895	2.42495	2.41543	2.46357	2.46135	2.43934	2.46029	2.42713	2.44146	2.43625	2.47317	2.44865	2.46447	2.44767	2.39701	2.43963	2.44159	2.43485	2.44891	2.4175	2.45339	2.44318	2.45772	2.46814	2.44724	2.4659	2.43645	2.43369	2.46998	2.43393	2.44337	2.41591	2.44286	2.41837	2.43066	2.43234	2.45439	2.44435	2.41128	2.43534	2.47262	2.45533	2.45319	2.44692	2.43205	2.43057
17.6967		2.42867	2.40909	2.43821	2.41486	2.40497	2.45398	2.45157	2.42944	2.45063	2.41732	2.43182	2.42569	2.46368	2.43885	2.45462	2.43779	2.3875	2.42957	2.43136	2.42484	2.4391	2.40782	2.44346	2.43258	2.44782	2.45833	2.43766	2.45607	2.42682	2.42376	2.45993	2.42398	2.433	2.40602	2.43312	2.40849	2.42099	2.42199	2.44497	2.43429	2.40156	2.42555	2.46306	2.44554	2.44392	2.43711	2.42203	2.42021
18.0989		2.41919	2.39964	2.42759	2.40508	2.39482	2.44468	2.44203	2.41984	2.44121	2.40775	2.42235	2.41549	2.45442	2.4293	2.44501	2.42816	2.3782	2.41983	2.42143	2.41508	2.4295	2.39838	2.43378	2.42246	2.43818	2.4488	2.42826	2.44649	2.41739	2.41413	2.4502	2.41429	2.42283	2.39634	2.42361	2.3989	2.41158	2.41186	2.43568	2.42449	2.39208	2.41602	2.45371	2.43599	2.43487	2.42756	2.41226	2.41009
18.5011		2.40988	2.39046	2.41719	2.39562	2.38504	2.43561	2.43274	2.41053	2.43201	2.39846	2.41305	2.40566	2.44538	2.42	2.43567	2.4188	2.36913	2.41039	2.4118	2.4056	2.42015	2.38915	2.42434	2.4128	2.42882	2.43953	2.41906	2.43714	2.40816	2.40477	2.44078	2.40486	2.41293	2.3869	2.41431	2.38961	2.40243	2.40204	2.42653	2.41496	2.38287	2.40678	2.44455	2.42669	2.42602	2.41826	2.40277	2.40024
18.9033		2.40076	2.38154	2.40708	2.38647	2.37566	2.42675	2.42368	2.40149	2.42302	2.38944	2.40395	2.39621	2.43656	2.41093	2.4266	2.40971	2.3603	2.40125	2.40248	2.39643	2.41108	2.38014	2.41515	2.4036	2.41972	2.4305	2.41007	2.42803	2.39914	2.39567	2.43165	2.39568	2.40334	2.37772	2.40522	2.38059	2.39353	2.39257	2.41755	2.40572	2.3739	2.3978	2.43559	2.41762	2.41736	2.40919	2.39358	2.39068
19.3055		2.39183	2.37287	2.39729	2.3776	2.36666	2.41806	2.41484	2.39269	2.41422	2.38069	2.39504	2.38711	2.42796	2.40209	2.4178	2.40087	2.35169	2.39239	2.39346	2.38755	2.40229	2.37133	2.40619	2.39478	2.41088	2.42168	2.40131	2.41914	2.39034	2.38681	2.42279	2.38673	2.39407	2.3688	2.39634	2.37182	2.38484	2.38348	2.40874	2.39675	2.36518	2.38907	2.42681	2.40878	2.40887	2.40035	2.38468	2.38142
19.7077		2.3831	2.36444	2.38782	2.36897	2.35803	2.40953	2.4062	2.38411	2.40558	2.3722	2.38634	2.37831	2.41956	2.39347	2.40925	2.39228	2.34329	2.38378	2.38472	2.37896	2.39379	2.36271	2.39746	2.3863	2.40228	2.41305	2.39276	2.41047	2.38175	2.37817	2.41416	2.37801	2.38511	2.36014	2.38764	2.36326	2.37637	2.37473	2.40011	2.38805	2.35667	2.38056	2.41822	2.40016	2.40053	2.39171	2.37604	2.37246
20.1099		2.37457	2.35621	2.37866	2.36056	2.3497	2.40116	2.39777	2.37573	2.39712	2.36393	2.37787	2.36979	2.41138	2.38506	2.40093	2.3839	2.33509	2.37539	2.37624	2.37062	2.38556	2.3543	2.38894	2.37809	2.39389	2.40459	2.38445	2.40201	2.37339	2.36974	2.40575	2.36949	2.37645	2.35171	2.37914	2.3549	2.36808	2.36631	2.39169	2.3796	2.34838	2.37225	2.40983	2.39175	2.39236	2.38327	2.36764	2.36379
20.5121		2.36626	2.34818	2.36978	2.35235	2.34164	2.39295	2.38952	2.36754	2.38882	2.35586	2.36964	2.36149	2.4034	2.37686	2.39281	2.37574	2.32705	2.3672	2.36799	2.36249	2.37757	2.3461	2.38064	2.37009	2.3857	2.39631	2.37637	2.39374	2.36524	2.36151	2.39754	2.36118	2.36807	2.34349	2.37085	2.34671	2.35997	2.35814	2.38347	2.37138	2.34028	2.3641	2.40165	2.38354	2.38433	2.37502	2.35946	2.35538
20.9143		2.35816	2.34031	2.36116	2.3443	2.33379	2.38493	2.38147	2.35953	2.38071	2.34797	2.36168	2.35339	2.39564	2.36886	2.3849	2.36778	2.31917	2.3592	2.35996	2.35456	2.3698	2.33813	2.37256	2.36226	2.37769	2.38821	2.36851	2.38566	2.35731	2.35349	2.38952	2.35308	2.35994	2.33548	2.36276	2.3387	2.35204	2.3502	2.37547	2.36338	2.33237	2.35611	2.39369	2.37553	2.37647	2.36696	2.35148	2.34724
21.3165		2.35029	2.33261	2.35276	2.33642	2.32613	2.3771	2.37363	2.3517	2.37278	2.34025	2.354	2.34546	2.38809	2.36107	2.37716	2.36001	2.31145	2.35138	2.35212	2.3468	2.36222	2.33039	2.3647	2.35456	2.36985	2.3803	2.36087	2.37778	2.3496	2.34569	2.38168	2.34519	2.35206	2.32766	2.35489	2.33085	2.34428	2.34242	2.36769	2.35557	2.32465	2.34827	2.38596	2.36772	2.36877	2.35909	2.34367	2.33935
21.7187		2.34265	2.32508	2.34459	2.32871	2.31862	2.36949	2.36598	2.34405	2.36507	2.33269	2.3466	2.33771	2.38075	2.35348	2.36962	2.35242	2.30388	2.34373	2.34448	2.33919	2.35483	2.32289	2.35707	2.34701	2.36218	2.37259	2.35343	2.3701	2.3421	2.33811	2.37402	2.33751	2.34439	2.32002	2.34725	2.32317	2.33671	2.3348	2.36014	2.34796	2.31711	2.34057	2.37846	2.3601	2.36125	2.35142	2.33604	2.3317
22.1209		2.33523	2.31771	2.33664	2.32117	2.31125	2.3621	2.35855	2.33658	2.35759	2.32529	2.33949	2.33011	2.37362	2.34611	2.36225	2.34502	2.29648	2.33627	2.33702	2.33174	2.3476	2.31563	2.34965	2.33958	2.35469	2.36508	2.34621	2.36262	2.33482	2.33074	2.36655	2.33005	2.33693	2.31257	2.33985	2.31568	2.32934	2.32731	2.35281	2.34055	2.30977	2.33304	2.3712	2.35269	2.35391	2.34395	2.32859	2.32428
22.5231		2.32804	2.31052	2.32892	2.31381	2.30403	2.35496	2.35134	2.32931	2.35034	2.31807	2.33264	2.32269	2.3667	2.33894	2.35508	2.33781	2.28925	2.32899	2.32976	2.32445	2.34052	2.30861	2.34244	2.33233	2.34739	2.3578	2.33918	2.35536	2.32775	2.3236	2.35927	2.32282	2.32967	2.30531	2.33269	2.30839	2.32216	2.31996	2.34571	2.33332	2.30262	2.32568	2.36416	2.34548	2.34677	2.3367	2.32132	2.31708
22.9253		2.32108	2.30353	2.32143	2.30665	2.29696	2.34805	2.34434	2.32223	2.34332	2.31103	2.32604	2.31546	2.35997	2.33199	2.3481	2.3308	2.28221	2.32192	2.32268	2.31733	2.33361	2.30183	2.33545	2.32526	2.34028	2.35073	2.33234	2.34832	2.32089	2.31667	2.35218	2.31581	2.32262	2.29824	2.32576	2.30131	2.31519	2.31277	2.33883	2.32628	2.29567	2.31852	2.35734	2.33847	2.33983	2.32965	2.31424	2.3101
23.3275		2.31432	2.29673	2.31419	2.29969	2.29007	2.34138	2.33756	2.31536	2.33655	2.30419	2.31965	2.30842	2.35342	2.32525	2.34133	2.32398	2.27537	2.31505	2.3158	2.31041	2.32686	2.29528	2.32866	2.31841	2.33338	2.34389	2.32569	2.34149	2.31424	2.30996	2.34529	2.30902	2.31576	2.29137	2.31905	2.29445	2.30843	2.30576	2.33217	2.31943	2.28891	2.31157	2.35072	2.33168	2.3331	2.32283	2.30737	2.30333
23.7297		2.30777	2.29015	2.30721	2.29295	2.28337	2.33492	2.331	2.30869	2.33001	2.29755	2.31345	2.3016	2.34705	2.31871	2.33477	2.31736	2.26875	2.30839	2.30912	2.30368	2.32028	2.28894	2.32206	2.3118	2.32669	2.33727	2.31923	2.33488	2.30779	2.30344	2.33859	2.30243	2.3091	2.2847	2.31255	2.28781	2.30188	2.29896	2.32571	2.31278	2.28236	2.30483	2.34428	2.32509	2.32657	2.31622	2.3007	2.29676
24.1319		2.30142	2.28377	2.30049	2.28644	2.27687	2.32866	2.32463	2.30223	2.3237	2.29112	2.3074	2.29499	2.34083	2.31238	2.32843	2.31094	2.26235	2.30195	2.30262	2.29717	2.31388	2.28279	2.31565	2.30543	2.32023	2.33086	2.31294	2.32848	2.30154	2.29713	2.33209	2.29605	2.30263	2.27825	2.30625	2.28139	2.29555	2.29238	2.31945	2.30633	2.276	2.29833	2.33802	2.31871	2.32026	2.30982	2.29425	2.29038
24.5341		2.29526	2.27761	2.29403	2.28015	2.2706	2.32258	2.31845	2.29597	2.3176	2.28492	2.3015	2.2886	2.33477	2.30624	2.32229	2.30473	2.25617	2.29572	2.29633	2.29089	2.30767	2.27683	2.30943	2.2993	2.31398	2.32465	2.30682	2.32229	2.29546	2.291	2.32578	2.28986	2.29635	2.27201	2.30012	2.27519	2.28941	2.28604	2.31338	2.30009	2.26984	2.29205	2.33191	2.31252	2.31415	2.30363	2.28801	2.2842
24.9363		2.28928	2.27166	2.28782	2.27407	2.26455	2.31667	2.31246	2.28992	2.3117	2.27893	2.29571	2.28244	2.32885	2.30029	2.31636	2.29871	2.2502	2.2897	2.29023	2.28484	2.30166	2.27102	2.30339	2.29339	2.30795	2.31863	2.30087	2.31629	2.28955	2.28506	2.31966	2.28384	2.29026	2.26597	2.29415	2.26921	2.28348	2.27995	2.30748	2.29406	2.26387	2.28599	2.32594	2.30653	2.30823	2.29764	2.28198	2.27819
25.3385		2.28347	2.26591	2.28185	2.26821	2.25873	2.31091	2.30663	2.28406	2.30598	2.27315	2.29005	2.27651	2.32306	2.29452	2.31062	2.29289	2.24444	2.2839	2.28432	2.27902	2.29583	2.26537	2.29754	2.28766	2.30213	2.31279	2.29507	2.31048	2.2838	2.2793	2.31372	2.27799	2.28435	2.26015	2.28834	2.26343	2.27773	2.2741	2.30176	2.28823	2.25809	2.28015	2.32012	2.30072	2.30249	2.29183	2.27615	2.27236
25.7407		2.27783	2.26036	2.27611	2.26254	2.25311	2.3053	2.30096	2.2784	2.30045	2.26757	2.2845	2.2708	2.3174	2.28892	2.30505	2.28726	2.23887	2.27829	2.27861	2.27342	2.29021	2.25987	2.29186	2.28209	2.29651	2.30712	2.28944	2.30484	2.27821	2.27372	2.30796	2.2723	2.27863	2.25453	2.28268	2.25784	2.27216	2.26848	2.29619	2.2826	2.25248	2.2745	2.31443	2.2951	2.29694	2.2862	2.27053	2.26671
26.1429		2.27235	2.25499	2.27057	2.25707	2.2477	2.29982	2.29545	2.27292	2.29508	2.26219	2.27908	2.26531	2.31188	2.28349	2.29966	2.28181	2.23348	2.27287	2.27309	2.26803	2.28476	2.25451	2.28638	2.27665	2.29109	2.30161	2.28396	2.29937	2.27277	2.26831	2.30238	2.26677	2.27309	2.2491	2.27717	2.25244	2.26677	2.26308	2.29079	2.27718	2.24706	2.26905	2.30888	2.28965	2.29155	2.28073	2.26509	2.26123
26.5451		2.26704	2.24981	2.26521	2.25178	2.24248	2.29449	2.2901	2.26762	2.28988	2.25699	2.27378	2.26002	2.30651	2.27823	2.29443	2.27654	2.22827	2.26763	2.26776	2.26283	2.2795	2.24931	2.28107	2.27133	2.28584	2.29627	2.27864	2.29407	2.26748	2.26307	2.29697	2.26139	2.26772	2.24386	2.2718	2.24721	2.26153	2.25788	2.28554	2.27195	2.24181	2.26376	2.30348	2.28438	2.28632	2.27544	2.25983	2.25593
26.9473		2.26189	2.24479	2.26003	2.24666	2.23744	2.28931	2.28491	2.2625	2.28485	2.25196	2.26862	2.25493	2.30128	2.27314	2.28936	2.27144	2.22321	2.26258	2.26262	2.25782	2.27441	2.24425	2.27596	2.26612	2.28076	2.29109	2.27348	2.28894	2.26235	2.25801	2.29174	2.25619	2.26253	2.2388	2.2666	2.24216	2.25646	2.25287	2.28045	2.2669	2.23673	2.25864	2.29824	2.27928	2.28125	2.2703	2.25474	2.25081
27.3495		2.2569	2.23994	2.25501	2.24171	2.23257	2.28428	2.27988	2.25756	2.27998	2.2471	2.2636	2.25004	2.29621	2.26821	2.28445	2.26652	2.21832	2.25768	2.25767	2.25298	2.26949	2.23936	2.27102	2.26104	2.27585	2.28608	2.26848	2.28397	2.25737	2.25313	2.28668	2.25115	2.25752	2.23392	2.26157	2.23727	2.25154	2.24804	2.27552	2.26204	2.23182	2.25367	2.29317	2.27436	2.27634	2.26533	2.24983	2.24587
27.7517		2.25208	2.23525	2.25013	2.23692	2.22787	2.27942	2.27503	2.25278	2.27527	2.24239	2.25872	2.24532	2.29131	2.26346	2.2797	2.26175	2.21357	2.25295	2.25291	2.24829	2.26472	2.23463	2.26627	2.25609	2.27109	2.28123	2.26363	2.27915	2.25256	2.24842	2.28179	2.24629	2.25267	2.22919	2.2567	2.23255	2.24678	2.24337	2.27076	2.25735	2.22708	2.24884	2.28828	2.26961	2.27158	2.26053	2.24507	2.2411
28.1539		2.24741	2.23072	2.2454	2.23228	2.22333	2.27473	2.27034	2.24816	2.27072	2.23784	2.254	2.24078	2.28659	2.25887	2.27511	2.25714	2.20897	2.24838	2.24832	2.24374	2.2601	2.23007	2.26169	2.25129	2.26648	2.27654	2.25895	2.2745	2.24792	2.24389	2.27707	2.2416	2.248	2.22462	2.25202	2.22799	2.24216	2.23886	2.26614	2.25282	2.22251	2.24416	2.28356	2.26503	2.26696	2.25588	2.24048	2.23651
28.5561		2.24291	2.22632	2.2408	2.2278	2.21895	2.27021	2.26581	2.24371	2.26632	2.23344	2.24944	2.2364	2.28204	2.25444	2.27067	2.25268	2.2045	2.24395	2.24389	2.23933	2.25562	2.22568	2.25728	2.24665	2.26201	2.27202	2.25441	2.27	2.24343	2.23952	2.27252	2.23709	2.24348	2.22021	2.24751	2.22357	2.2377	2.23449	2.26169	2.24846	2.2181	2.23962	2.27902	2.26062	2.2625	2.25139	2.23604	2.23208
28.9583		2.23856	2.22207	2.23635	2.22347	2.21472	2.26585	2.26145	2.2394	2.26208	2.22917	2.24503	2.23218	2.27766	2.25017	2.26639	2.24837	2.20018	2.23967	2.23963	2.23506	2.25127	2.22145	2.25302	2.24216	2.25768	2.26766	2.25003	2.26565	2.2391	2.23532	2.26812	2.23275	2.23912	2.21594	2.24316	2.21931	2.23337	2.23027	2.25738	2.24424	2.21385	2.23522	2.27465	2.25637	2.25817	2.24706	2.23175	2.22782
29.3605		2.23437	2.21796	2.23203	2.21929	2.21064	2.26165	2.25725	2.23525	2.25798	2.22505	2.24077	2.2281	2.27343	2.24605	2.26225	2.2442	2.19599	2.23553	2.23552	2.23093	2.24706	2.21737	2.24891	2.23784	2.25349	2.26345	2.24578	2.26145	2.23492	2.23127	2.26387	2.22857	2.23491	2.2118	2.23897	2.21518	2.22919	2.22617	2.25322	2.24017	2.20975	2.23095	2.27044	2.25226	2.25397	2.24288	2.2276	2.2237
29.7627		2.23032	2.21397	2.22786	2.21525	2.20671	2.2576	2.2532	2.23124	2.25402	2.22106	2.23665	2.22417	2.26937	2.24207	2.25825	2.24016	2.19193	2.23154	2.23156	2.22693	2.24298	2.21344	2.24495	2.23368	2.24944	2.2594	2.24167	2.25739	2.23089	2.22737	2.25976	2.22454	2.23085	2.20781	2.23493	2.21119	2.22515	2.2222	2.2492	2.23624	2.20578	2.22683	2.26638	2.24829	2.24992	2.23885	2.2236	2.21973
30.1649		2.2264	2.21011	2.22382	2.21136	2.20293	2.25369	2.24929	2.22737	2.2502	2.21721	2.23268	2.22037	2.26544	2.23823	2.2544	2.23626	2.18799	2.22768	2.22773	2.22307	2.23902	2.20965	2.24111	2.22967	2.24553	2.2555	2.23768	2.25347	2.22698	2.2236	2.25579	2.22064	2.22692	2.20395	2.23102	2.20732	2.22124	2.21835	2.24531	2.23244	2.20195	2.22283	2.26246	2.24446	2.24599	2.23495	2.21973	2.2159
30.5671		2.22263	2.20637	2.21992	2.2076	2.19928	2.24992	2.24551	2.22364	2.2465	2.21348	2.22883	2.2167	2.26165	2.23451	2.25066	2.23248	2.18418	2.22396	2.22405	2.21934	2.2352	2.20598	2.23741	2.22581	2.24175	2.25174	2.23382	2.24968	2.22321	2.21997	2.25195	2.21687	2.22312	2.20021	2.22724	2.20358	2.21746	2.21461	2.24155	2.22876	2.19825	2.21898	2.25866	2.24075	2.24219	2.23119	2.216	2.2122
30.9693		2.21898	2.20275	2.21615	2.20398	2.19576	2.24626	2.24186	2.22004	2.24293	2.20986	2.2251	2.21315	2.25797	2.23092	2.24705	2.22883	2.18048	2.22037	2.22049	2.21574	2.2315	2.20244	2.23384	2.22209	2.2381	2.24811	2.23009	2.24602	2.21955	2.21646	2.24824	2.21322	2.21944	2.1966	2.22357	2.19996	2.21381	2.211	2.23791	2.22521	2.19466	2.21525	2.25499	2.23716	2.23851	2.22756	2.21239	2.20862
31.3715		2.21545	2.19924	2.2125	2.20048	2.19237	2.24273	2.23833	2.21657	2.23947	2.20636	2.22148	2.20973	2.25442	2.22744	2.24356	2.22529	2.17689	2.21691	2.21706	2.21228	2.22792	2.199	2.2304	2.21851	2.23458	2.2446	2.22646	2.24247	2.21601	2.21308	2.24465	2.20968	2.21589	2.1931	2.22001	2.19646	2.21027	2.20749	2.23439	2.22178	2.19119	2.21164	2.25144	2.23368	2.23495	2.22405	2.2089	2.20516
31.7737		2.21204	2.19584	2.20895	2.1971	2.18908	2.23931	2.23492	2.21322	2.23613	2.20296	2.21797	2.20642	2.25097	2.22408	2.24018	2.22188	2.17342	2.21356	2.21376	2.20893	2.22445	2.19568	2.22707	2.21505	2.23117	2.24121	2.22296	2.23905	2.21257	2.20981	2.24118	2.20625	2.21245	2.1897	2.21656	2.19306	2.20685	2.2041	2.23098	2.21846	2.18783	2.20814	2.248	2.23031	2.23151	2.22065	2.20553	2.20181
32.1759		2.20873	2.19253	2.20549	2.19382	2.18589	2.236	2.23161	2.20998	2.2329	2.19966	2.21456	2.20323	2.24762	2.22084	2.23691	2.21857	2.17004	2.21033	2.21057	2.20569	2.2211	2.19246	2.22387	2.2117	2.22786	2.23793	2.21956	2.23574	2.20924	2.20665	2.23782	2.20292	2.20912	2.18641	2.21322	2.18977	2.20353	2.20082	2.22768	2.21525	2.18457	2.20475	2.24468	2.22705	2.22817	2.21737	2.20226	2.19857
32.5781		2.20553	2.1893	2.20212	2.19064	2.1828	2.23279	2.22841	2.20685	2.22977	2.19645	2.21125	2.20014	2.24438	2.2177	2.23373	2.21537	2.16675	2.2072	2.20749	2.20255	2.21785	2.18933	2.22078	2.20844	2.22465	2.23475	2.21626	2.23253	2.20602	2.2036	2.23457	2.1997	2.20589	2.18321	2.20998	2.18658	2.20032	2.19764	2.22449	2.21214	2.18142	2.20144	2.24147	2.22388	2.22494	2.21419	2.19909	2.19543
32.9803		2.20243	2.18616	2.19883	2.18754	2.17978	2.22969	2.22531	2.20381	2.22674	2.19332	2.20803	2.19714	2.24122	2.21465	2.23064	2.21227	2.16355	2.20417	2.20451	2.1995	2.21469	2.1863	2.21779	2.20527	2.22152	2.23166	2.21306	2.22941	2.20288	2.20065	2.23142	2.19658	2.20275	2.18009	2.20684	2.18349	2.19719	2.19456	2.22138	2.20912	2.17836	2.19822	2.23837	2.2208	2.2218	2.2111	2.196	2.19239
33.3825		2.1994	2.18309	2.19561	2.18452	2.17683	2.22668	2.22229	2.20086	2.22379	2.19027	2.20489	2.19424	2.23815	2.2117	2.22764	2.20926	2.16043	2.20121	2.20162	2.19652	2.21161	2.18335	2.2149	2.20218	2.21847	2.22866	2.20995	2.22638	2.19984	2.19778	2.22837	2.19355	2.19969	2.17706	2.20379	2.18048	2.19415	2.19156	2.21836	2.20618	2.17539	2.19507	2.23538	2.21781	2.21874	2.20811	2.193	2.18944
33.7847		2.19646	2.1801	2.19249	2.18157	2.17393	2.22376	2.21935	2.19798	2.22091	2.18729	2.20184	2.19141	2.23515	2.20883	2.22471	2.20634	2.15737	2.19833	2.1988	2.1936	2.20861	2.18049	2.21208	2.19915	2.21548	2.22574	2.20692	2.22343	2.19688	2.195	2.2254	2.1906	2.19671	2.1741	2.20083	2.17755	2.19118	2.18865	2.21541	2.20332	2.1725	2.19199	2.23246	2.2149	2.21576	2.2052	2.19006	2.18657
34.1869		2.19358	2.17716	2.18945	2.1787	2.17109	2.22091	2.21649	2.19517	2.2181	2.18438	2.19888	2.18864	2.23222	2.20602	2.22184	2.20348	2.15439	2.19551	2.19605	2.19075	2.20568	2.17771	2.20932	2.19618	2.21257	2.22289	2.20395	2.22053	2.194	2.19229	2.2225	2.18774	2.19381	2.17121	2.19794	2.17469	2.1883	2.18579	2.21252	2.20051	2.16968	2.18898	2.22963	2.21206	2.21284	2.20235	2.18719	2.18377
34.5891		2.19076	2.1743	2.18652	2.17589	2.16829	2.21813	2.21368	2.19241	2.21534	2.18153	2.19598	2.18592	2.22933	2.20327	2.21902	2.20069	2.15147	2.19275	2.19334	2.18795	2.2028	2.17501	2.20662	2.19327	2.20973	2.22011	2.20105	2.21769	2.19118	2.18963	2.21967	2.18493	2.19097	2.16839	2.19511	2.17188	2.18548	2.183	2.20968	2.19775	2.16692	2.18604	2.22685	2.20928	2.20997	2.19957	2.18438	2.18102
34.9913		2.188	2.17151	2.18372	2.17315	2.16553	2.21539	2.21093	2.18969	2.21263	2.17874	2.19315	2.18324	2.2265	2.20056	2.21625	2.19796	2.14861	2.19004	2.19067	2.1852	2.19998	2.17238	2.20395	2.19044	2.20696	2.2174	2.19821	2.2149	2.18842	2.18701	2.2169	2.18218	2.1882	2.16564	2.19232	2.16914	2.18272	2.18025	2.20688	2.19502	2.1642	2.18317	2.22412	2.20654	2.20714	2.19683	2.18162	2.17833
35.3935		2.18529	2.16879	2.18105	2.17048	2.16281	2.2127	2.20822	2.18701	2.20997	2.176	2.19039	2.18057	2.22369	2.19787	2.21351	2.19527	2.14582	2.18736	2.18803	2.1825	2.19719	2.16981	2.2013	2.1877	2.20426	2.21475	2.19541	2.21214	2.18572	2.18441	2.21418	2.17947	2.1855	2.16295	2.18956	2.16644	2.18003	2.17755	2.20412	2.1923	2.16151	2.18037	2.22142	2.20384	2.20435	2.19414	2.1789	2.17568
35.7957		2.18262	2.16614	2.17853	2.16788	2.16011	2.21005	2.20555	2.18435	2.20734	2.17332	2.18769	2.17791	2.22092	2.19521	2.21081	2.19264	2.14309	2.18473	2.18541	2.17984	2.19445	2.16731	2.19866	2.18504	2.20165	2.21215	2.19266	2.20942	2.18308	2.18183	2.21151	2.17678	2.18285	2.16031	2.18683	2.16378	2.1774	2.17488	2.20137	2.18959	2.15884	2.17764	2.21874	2.20117	2.2016	2.19148	2.17623	2.17307
36.1979		2.17999	2.16357	2.17616	2.16535	2.15745	2.20743	2.20292	2.18173	2.20476	2.17069	2.18504	2.17526	2.21817	2.19257	2.20814	2.19004	2.14043	2.18213	2.1828	2.17721	2.19173	2.16486	2.19603	2.1825	2.19912	2.20962	2.18994	2.20673	2.18048	2.17926	2.20889	2.17412	2.18026	2.15773	2.1841	2.16116	2.17482	2.17227	2.19865	2.18689	2.15619	2.17499	2.21608	2.19852	2.19887	2.18886	2.1736	2.1705
36.6001		2.1774	2.16107	2.17394	2.16289	2.1548	2.20484	2.20033	2.17912	2.20221	2.16811	2.18244	2.17261	2.21545	2.18994	2.20549	2.18748	2.13783	2.17956	2.1802	2.17463	2.18904	2.16246	2.1934	2.18006	2.19667	2.20713	2.18727	2.20408	2.17792	2.17668	2.2063	2.17148	2.17773	2.1552	2.18139	2.15858	2.1723	2.16969	2.19595	2.18418	2.15354	2.1724	2.21343	2.19588	2.19617	2.18628	2.17101	2.16796
37.0023		2.17485	2.15864	2.17186	2.16048	2.15219	2.20229	2.19777	2.17655	2.1997	2.16557	2.17987	2.16997	2.21275	2.18733	2.20287	2.18496	2.13529	2.17703	2.17761	2.17207	2.18636	2.1601	2.19077	2.17774	2.19428	2.2047	2.18463	2.20146	2.17541	2.1741	2.20376	2.16885	2.17525	2.15271	2.17868	2.15603	2.16983	2.16717	2.19327	2.18147	2.15091	2.16988	2.21081	2.19327	2.1935	2.18372	2.16845	2.16546
37.4045		2.17234	2.15628	2.1699	2.15813	2.14959	2.19977	2.19525	2.17401	2.19723	2.16307	2.17733	2.16733	2.21009	2.18473	2.20029	2.18247	2.13282	2.17453	2.17504	2.16954	2.18371	2.1578	2.18814	2.17553	2.19196	2.20232	2.18202	2.19889	2.17294	2.17152	2.20126	2.16626	2.17283	2.15026	2.17599	2.15352	2.16741	2.1647	2.19062	2.17876	2.14829	2.16741	2.2082	2.19067	2.19086	2.1812	2.16593	2.163
37.8067		2.16987	2.15396	2.16803	2.15582	2.14702	2.19728	2.19276	2.17151	2.19481	2.16061	2.17482	2.16472	2.20746	2.18216	2.19773	2.18003	2.13041	2.17207	2.17249	2.16703	2.18107	2.15553	2.18553	2.17341	2.18968	2.19999	2.17945	2.19636	2.17051	2.16896	2.19881	2.16369	2.17046	2.14785	2.17333	2.15105	2.16503	2.16229	2.188	2.17607	2.14569	2.165	2.20563	2.18809	2.18826	2.17872	2.16343	2.16057
38.2089		2.16744	2.1517	2.16624	2.15355	2.14448	2.19485	2.19032	2.16904	2.19242	2.15819	2.17232	2.16213	2.20487	2.17962	2.19521	2.17763	2.12805	2.16965	2.16997	2.16456	2.17846	2.15331	2.18294	2.17137	2.18745	2.1977	2.17691	2.19387	2.16812	2.16642	2.19639	2.16116	2.16813	2.14547	2.1707	2.14861	2.1627	2.15994	2.18541	2.17339	2.14312	2.16262	2.20309	2.18555	2.18569	2.17629	2.16095	2.15819
38.6111		2.16507	2.14947	2.16448	2.15131	2.14197	2.19246	2.18793	2.16663	2.19007	2.1558	2.16984	2.15959	2.20234	2.17712	2.19272	2.17526	2.12575	2.16726	2.16749	2.16211	2.17588	2.15113	2.18038	2.1694	2.18524	2.19546	2.1744	2.19143	2.16577	2.16393	2.19401	2.15868	2.16585	2.14314	2.16812	2.14622	2.16041	2.15763	2.18287	2.17075	2.14059	2.16027	2.20061	2.18304	2.18316	2.1739	2.15851	2.15585
39.0133		2.16274	2.14726	2.16274	2.14909	2.13949	2.19012	2.18558	2.16427	2.18777	2.15346	2.16738	2.1571	2.19985	2.17467	2.19028	2.17294	2.12348	2.16492	2.16506	2.15971	2.17334	2.14899	2.17787	2.16745	2.18306	2.19325	2.17193	2.18904	2.16345	2.16148	2.19167	2.15625	2.16361	2.14084	2.16559	2.14387	2.15815	2.15538	2.18037	2.16816	2.13811	2.15795	2.19818	2.18057	2.18068	2.17156	2.15609	2.15356
39.4155		2.16046	2.14507	2.16098	2.14689	2.13706	2.18783	2.18327	2.16197	2.1855	2.15114	2.16495	2.15467	2.19741	2.17227	2.18788	2.17066	2.12125	2.16262	2.16268	2.15734	2.17084	2.1469	2.17542	2.16553	2.18089	2.19109	2.1695	2.1867	2.16117	2.15911	2.18937	2.15387	2.1614	2.13857	2.16311	2.14157	2.15593	2.15317	2.17793	2.16564	2.13569	2.15565	2.19581	2.17815	2.17824	2.16926	2.15371	2.15131
39.8177		2.15822	2.14289	2.15919	2.14472	2.13467	2.18559	2.18101	2.15972	2.18329	2.14887	2.16255	2.1523	2.19502	2.16993	2.18554	2.16842	2.11905	2.16036	2.16037	2.15502	2.16839	2.14484	2.17304	2.1636	2.17873	2.18895	2.16711	2.1844	2.15893	2.15681	2.1871	2.15156	2.15921	2.13635	2.1607	2.13932	2.15375	2.151	2.17554	2.16318	2.13333	2.15338	2.19351	2.17578	2.17585	2.16701	2.15137	2.14911
40.2199		2.15604	2.14073	2.15735	2.14257	2.13235	2.1834	2.1788	2.15752	2.18112	2.14664	2.16019	2.15	2.19269	2.16766	2.18325	2.16623	2.11686	2.15815	2.15813	2.15275	2.166	2.14283	2.17073	2.16164	2.17659	2.18684	2.16477	2.18215	2.15673	2.15458	2.18486	2.1493	2.15705	2.13416	2.15835	2.13711	2.15159	2.14886	2.17322	2.16081	2.13104	2.15112	2.19127	2.17348	2.17352	2.16481	2.14907	2.14697
40.6221		2.1539	2.13857	2.15546	2.14045	2.13009	2.18125	2.17663	2.15537	2.17899	2.14445	2.15788	2.14777	2.19041	2.16546	2.18102	2.16407	2.1147	2.15599	2.15596	2.15055	2.16366	2.14084	2.1685	2.15966	2.17447	2.18475	2.16247	2.17995	2.15456	2.15244	2.18265	2.14709	2.1549	2.13202	2.15606	2.13496	2.14946	2.14675	2.17095	2.15853	2.12882	2.1489	2.1891	2.17125	2.17123	2.16264	2.14682	2.14486
41.0243		2.1518	2.13642	2.15351	2.13836	2.12791	2.17914	2.1745	2.15328	2.17691	2.14231	2.15562	2.14562	2.18817	2.16333	2.17885	2.16195	2.11254	2.15387	2.15385	2.1484	2.1614	2.13889	2.16635	2.15763	2.17237	2.18268	2.16022	2.17779	2.15244	2.15037	2.18048	2.14493	2.15277	2.12992	2.15381	2.13285	2.14737	2.14467	2.16874	2.15633	2.12666	2.1467	2.18699	2.16908	2.169	2.16052	2.14463	2.14281
41.4265		2.14974	2.13429	2.15151	2.13631	2.12581	2.17707	2.17242	2.15122	2.17487	2.1402	2.15343	2.14353	2.18598	2.16126	2.17675	2.15988	2.1104	2.1518	2.15181	2.14632	2.15919	2.13697	2.16428	2.15557	2.1703	2.18062	2.15802	2.17568	2.15034	2.14837	2.17834	2.14282	2.15066	2.12786	2.15162	2.13079	2.1453	2.14263	2.1666	2.15422	2.12457	2.14453	2.18494	2.16697	2.16682	2.15844	2.14249	2.1408
41.8287		2.14772	2.13217	2.14947	2.1343	2.12378	2.17504	2.17037	2.14922	2.17287	2.13814	2.15128	2.14151	2.18384	2.15926	2.17471	2.15784	2.10828	2.14978	2.14983	2.1443	2.15706	2.13508	2.16229	2.15348	2.16826	2.17858	2.15587	2.1736	2.14829	2.14643	2.17623	2.14074	2.14856	2.12584	2.14947	2.12878	2.14326	2.14063	2.1645	2.1522	2.12253	2.14239	2.18295	2.16493	2.1647	2.15639	2.14042	2.13883
42.2309		2.14573	2.13008	2.14739	2.13233	2.12182	2.17304	2.16835	2.14725	2.17092	2.13612	2.14918	2.13956	2.18175	2.15731	2.17273	2.15585	2.10617	2.14781	2.14791	2.14234	2.15498	2.13321	2.16036	2.15137	2.16626	2.17655	2.15376	2.17156	2.14627	2.14454	2.17417	2.13871	2.14649	2.12386	2.14735	2.1268	2.14125	2.13866	2.16246	2.15026	2.12055	2.14029	2.181	2.16296	2.16263	2.15439	2.13841	2.1369
42.6331		2.14377	2.12801	2.1453	2.1304	2.11993	2.17106	2.16638	2.14533	2.16899	2.13415	2.14711	2.13767	2.17969	2.15542	2.17081	2.1539	2.10408	2.1459	2.14604	2.14043	2.15296	2.13136	2.1585	2.14925	2.16429	2.17453	2.15169	2.16956	2.14428	2.1427	2.17214	2.13671	2.14444	2.12192	2.14527	2.12486	2.13927	2.13674	2.16046	2.1484	2.11861	2.13822	2.1791	2.16104	2.1606	2.15242	2.13646	2.13501
43.0353		2.14184	2.12596	2.1432	2.12852	2.1181	2.16912	2.16444	2.14344	2.1671	2.13221	2.14507	2.13583	2.17768	2.15358	2.16894	2.15198	2.10201	2.14402	2.1442	2.13858	2.151	2.12952	2.1567	2.14714	2.16236	2.17253	2.14965	2.1676	2.14232	2.1409	2.17015	2.13475	2.14241	2.12003	2.14322	2.12296	2.13732	2.13486	2.1585	2.14659	2.11671	2.13619	2.17723	2.15917	2.15861	2.15049	2.13457	2.13315
43.4375		2.13993	2.12396	2.14111	2.12668	2.11632	2.16719	2.16253	2.14159	2.16525	2.13031	2.14305	2.13405	2.1757	2.15177	2.16712	2.1501	2.09997	2.14219	2.1424	2.13677	2.14908	2.12771	2.15494	2.14504	2.16047	2.17055	2.14763	2.16566	2.1404	2.13913	2.16819	2.13282	2.14041	2.11816	2.1412	2.12109	2.1354	2.13303	2.15657	2.14483	2.11484	2.13418	2.1754	2.15734	2.15666	2.1486	2.13272	2.13132
43.8397		2.13803	2.12199	2.13905	2.12488	2.11457	2.1653	2.16065	2.13977	2.16342	2.12844	2.14104	2.13231	2.17375	2.15	2.16533	2.14826	2.09796	2.1404	2.14063	2.135	2.14719	2.12591	2.15322	2.14297	2.15862	2.16859	2.14564	2.16376	2.1385	2.1374	2.16628	2.13092	2.13845	2.11633	2.1392	2.11924	2.1335	2.13124	2.15468	2.14311	2.11299	2.1322	2.17359	2.15555	2.15474	2.14675	2.13091	2.12952
44.2419		2.13615	2.12005	2.13703	2.12311	2.11285	2.16343	2.1588	2.13798	2.16161	2.12661	2.13903	2.1306	2.17182	2.14824	2.16356	2.14644	2.09598	2.13863	2.13887	2.13326	2.14533	2.12414	2.15152	2.14095	2.1568	2.16666	2.14366	2.16189	2.13663	2.13571	2.1644	2.12905	2.13651	2.11452	2.13723	2.11743	2.13164	2.12949	2.15281	2.14141	2.11117	2.13025	2.17181	2.15378	2.15285	2.14493	2.12912	2.12776
44.6441		2.13429	2.11816	2.13506	2.12137	2.11115	2.16158	2.15698	2.13622	2.15983	2.1248	2.13704	2.12892	2.16991	2.14649	2.16181	2.14464	2.09404	2.13689	2.13714	2.13155	2.14349	2.1224	2.14984	2.13898	2.15501	2.16477	2.1417	2.16004	2.13479	2.13403	2.16256	2.12721	2.13461	2.11274	2.13528	2.11564	2.1298	2.12776	2.15096	2.13972	2.10937	2.12832	2.17004	2.15203	2.15097	2.14315	2.12736	2.12601
45.0463		2.13243	2.1163	2.13315	2.11966	2.10945	2.15975	2.15517	2.13448	2.15807	2.123	2.13506	2.12725	2.16801	2.14476	2.16007	2.14286	2.09212	2.13517	2.13541	2.12985	2.14166	2.12068	2.14817	2.13707	2.15325	2.16291	2.13977	2.15821	2.13297	2.13238	2.16075	2.12539	2.13274	2.11097	2.13335	2.11387	2.12799	2.12606	2.14914	2.13804	2.10758	2.12642	2.16828	2.15029	2.14911	2.1414	2.12561	2.12429
45.4485		2.13059	2.11448	2.13131	2.11797	2.10776	2.15794	2.15339	2.13275	2.15633	2.12123	2.13311	2.12559	2.16612	2.14304	2.15834	2.1411	2.09023	2.13346	2.1337	2.12817	2.13984	2.11899	2.1465	2.13523	2.15152	2.16109	2.13785	2.1564	2.13116	2.13075	2.15896	2.12358	2.1309	2.10922	2.13143	2.11211	2.12621	2.12437	2.14732	2.13635	2.1058	2.12453	2.16653	2.14856	2.14726	2.13967	2.12387	2.12259
45.8507		2.12876	2.11269	2.12952	2.1163	2.10608	2.15615	2.15162	2.13105	2.15459	2.11947	2.13119	2.12392	2.16422	2.14131	2.1566	2.13935	2.08837	2.13176	2.13199	2.12648	2.13801	2.11733	2.14482	2.13345	2.1498	2.1593	2.13595	2.1546	2.12937	2.12912	2.15719	2.12179	2.12909	2.10748	2.12951	2.11037	2.12445	2.12268	2.14552	2.13465	2.10402	2.12267	2.16478	2.14683	2.14543	2.13796	2.12214	2.1209
46.2529		2.12694	2.11093	2.12781	2.11465	2.10439	2.15438	2.14987	2.12936	2.15288	2.11772	2.1293	2.12226	2.16232	2.1396	2.15486	2.13761	2.08654	2.13007	2.13028	2.12481	2.13619	2.1157	2.14313	2.13172	2.14811	2.15755	2.13407	2.15281	2.1276	2.12749	2.15543	2.12001	2.12729	2.10575	2.12761	2.10864	2.12273	2.121	2.14373	2.13293	2.10225	2.12083	2.16304	2.14509	2.1436	2.13627	2.1204	2.11922
46.6551		2.12515	2.10919	2.12614	2.11303	2.10271	2.15263	2.14813	2.12768	2.15117	2.11598	2.12745	2.12059	2.16042	2.13789	2.15312	2.13588	2.08473	2.12838	2.12858	2.12314	2.13437	2.1141	2.14144	2.13006	2.14643	2.15583	2.13221	2.15104	2.12584	2.12586	2.1537	2.11823	2.12552	2.10403	2.1257	2.10692	2.12103	2.11932	2.14195	2.13121	2.10049	2.119	2.1613	2.14336	2.14179	2.13459	2.11868	2.11756
47.0573		2.12338	2.10747	2.12453	2.11143	2.10104	2.15089	2.1464	2.12603	2.14948	2.11425	2.12564	2.11892	2.15853	2.1362	2.15139	2.13417	2.08294	2.12671	2.1269	2.12147	2.13256	2.11253	2.13975	2.12843	2.14476	2.15413	2.13038	2.14927	2.1241	2.12423	2.15198	2.11647	2.12377	2.10233	2.12381	2.10522	2.11936	2.11764	2.14018	2.1295	2.09874	2.1172	2.15957	2.14164	2.14	2.13292	2.11696	2.11591
47.4595		2.12164	2.10577	2.12294	2.10986	2.09939	2.14918	2.14469	2.12439	2.1478	2.11255	2.12386	2.11726	2.15664	2.13452	2.14968	2.13247	2.08118	2.12505	2.12522	2.11982	2.13076	2.11099	2.13805	2.12684	2.14312	2.15247	2.12857	2.14752	2.12238	2.1226	2.15029	2.11472	2.12204	2.10065	2.12193	2.10353	2.11771	2.11598	2.13842	2.12779	2.097	2.11542	2.15785	2.13993	2.13823	2.13126	2.11526	2.11428
47.8617		2.11994	2.10409	2.12138	2.10832	2.09778	2.14749	2.14301	2.12278	2.14615	2.11087	2.12212	2.11563	2.15478	2.13287	2.148	2.1308	2.07944	2.12342	2.12357	2.1182	2.12899	2.10947	2.13638	2.12526	2.14149	2.15082	2.12678	2.1458	2.12069	2.12098	2.14861	2.11298	2.12032	2.09899	2.12007	2.10186	2.1161	2.11436	2.13668	2.1261	2.09528	2.11366	2.15614	2.13825	2.13648	2.12961	2.11358	2.11267
48.2638		2.11828	2.10244	2.11983	2.10681	2.0962	2.14583	2.14135	2.1212	2.14452	2.10922	2.1204	2.11402	2.15295	2.13125	2.14636	2.12916	2.07772	2.12181	2.12195	2.1166	2.12725	2.10797	2.13473	2.12368	2.13989	2.1492	2.12502	2.14409	2.11902	2.11939	2.14696	2.11127	2.11863	2.09736	2.11823	2.10021	2.11451	2.11277	2.13498	2.12445	2.09359	2.11192	2.15447	2.13659	2.13476	2.12798	2.11193	2.11108
48.666		2.11665	2.1008	2.11826	2.10533	2.09467	2.14419	2.13973	2.11966	2.14293	2.1076	2.1187	2.11245	2.15115	2.12966	2.14477	2.12755	2.07603	2.12023	2.12037	2.11505	2.12556	2.1065	2.13312	2.1221	2.13831	2.1476	2.12329	2.14242	2.1174	2.11782	2.14535	2.1096	2.11697	2.09577	2.11644	2.0986	2.11294	2.11123	2.13331	2.12284	2.09193	2.11021	2.15283	2.13498	2.13308	2.12638	2.11032	2.10954
49.0682		2.11507	2.09919	2.11669	2.10389	2.09319	2.14258	2.13814	2.11815	2.14137	2.10604	2.11702	2.11093	2.14941	2.12812	2.14322	2.12598	2.07436	2.11869	2.11883	2.11354	2.12392	2.10505	2.13157	2.12051	2.13675	2.14602	2.12159	2.14079	2.1158	2.1163	2.14376	2.10796	2.11534	2.0942	2.11468	2.09703	2.1114	2.10974	2.13168	2.12129	2.09032	2.10853	2.15123	2.13341	2.13144	2.12481	2.10875	2.10802
49.4704		2.11351	2.0976	2.11508	2.10247	2.09176	2.14101	2.1366	2.11669	2.13985	2.10451	2.11536	2.10946	2.14771	2.12662	2.14173	2.12444	2.07271	2.11719	2.11735	2.11207	2.12233	2.10362	2.13007	2.11891	2.13521	2.14446	2.11992	2.1392	2.11424	2.11483	2.14222	2.10636	2.11374	2.09267	2.11297	2.09549	2.10988	2.1083	2.1301	2.11981	2.08876	2.10688	2.14968	2.1319	2.12984	2.12328	2.10721	2.10655
49.8726		2.11199	2.09604	2.11344	2.10108	2.09038	2.13945	2.13509	2.11527	2.13836	2.10303	2.11372	2.10806	2.14606	2.12516	2.14028	2.12296	2.07108	2.11573	2.11592	2.11066	2.12079	2.10221	2.12864	2.1173	2.13369	2.14292	2.11829	2.13766	2.11272	2.11341	2.14071	2.10481	2.11217	2.09117	2.11131	2.094	2.10839	2.10692	2.12857	2.11839	2.08724	2.10526	2.14817	2.13043	2.12829	2.12179	2.10572	2.10512
50.2748		2.1105	2.09449	2.11177	2.09971	2.08905	2.13792	2.13362	2.1139	2.13691	2.10159	2.11211	2.10672	2.14446	2.12375	2.13889	2.12151	2.06948	2.11432	2.11455	2.10928	2.11931	2.10082	2.12728	2.11569	2.13218	2.1414	2.1167	2.13615	2.11123	2.11205	2.13923	2.10331	2.11063	2.0897	2.10969	2.09255	2.10692	2.10557	2.12709	2.11704	2.08578	2.10367	2.14671	2.12902	2.12678	2.12033	2.10427	2.10373
50.677		2.10903	2.09297	2.11007	2.09836	2.08776	2.13642	2.1322	2.11258	2.13548	2.10019	2.11054	2.10544	2.1429	2.12239	2.13753	2.1201	2.0679	2.11294	2.11323	2.10795	2.11787	2.09944	2.12598	2.11407	2.13068	2.1399	2.11514	2.13469	2.10978	2.11074	2.13778	2.10185	2.10911	2.08827	2.10812	2.09113	2.10548	2.10426	2.12566	2.11574	2.08436	2.1021	2.1453	2.12766	2.12531	2.11891	2.10286	2.10237
51.0792		2.10757	2.09146	2.10835	2.09702	2.08651	2.13494	2.13082	2.11129	2.13408	2.09882	2.109	2.10422	2.14138	2.12106	2.1362	2.11874	2.06635	2.11161	2.11196	2.10665	2.11648	2.09809	2.12473	2.11245	2.1292	2.13843	2.11361	2.13327	2.10836	2.10948	2.13635	2.10043	2.10762	2.08688	2.1066	2.08975	2.10406	2.10296	2.12428	2.1145	2.08298	2.10056	2.14394	2.12634	2.12388	2.11752	2.10148	2.10104
51.4814		2.10614	2.08997	2.10663	2.09571	2.08527	2.13349	2.12947	2.11004	2.13271	2.09747	2.10749	2.10303	2.13989	2.11977	2.13491	2.11741	2.06482	2.11031	2.11072	2.10537	2.11511	2.09675	2.12353	2.11083	2.12774	2.13697	2.11212	2.13188	2.10697	2.10827	2.13495	2.09904	2.10615	2.08551	2.10511	2.08841	2.10266	2.10168	2.12293	2.11329	2.08165	2.09905	2.14261	2.12506	2.12247	2.11615	2.10014	2.09974
51.8836		2.10473	2.0885	2.10491	2.09441	2.08405	2.13208	2.12816	2.10882	2.13135	2.09614	2.10602	2.10189	2.13843	2.11852	2.13362	2.11611	2.06331	2.10904	2.10952	2.10412	2.11378	2.09544	2.12237	2.10922	2.1263	2.13555	2.11067	2.13051	2.10561	2.1071	2.13357	2.09769	2.10469	2.08418	2.10365	2.08709	2.10129	2.1004	2.12162	2.11211	2.08034	2.09756	2.14131	2.12382	2.12109	2.11481	2.09882	2.09847
52.2858		2.10335	2.08704	2.10324	2.09314	2.08283	2.1307	2.12687	2.10763	2.13001	2.09482	2.10457	2.10076	2.13698	2.11728	2.13235	2.11483	2.06184	2.1078	2.10833	2.10289	2.11246	2.09416	2.12123	2.10762	2.12488	2.13415	2.10925	2.12916	2.10427	2.10595	2.1322	2.09635	2.10325	2.08288	2.10222	2.08578	2.09994	2.09912	2.12032	2.11095	2.07906	2.09609	2.14004	2.1226	2.11972	2.11349	2.09753	2.09722
52.688		2.10198	2.0856	2.10163	2.09189	2.08161	2.12935	2.12561	2.10645	2.12869	2.09352	2.10316	2.09963	2.13555	2.11606	2.13109	2.11358	2.06039	2.10657	2.10715	2.10166	2.11114	2.0929	2.1201	2.10604	2.1235	2.13278	2.10785	2.12783	2.10296	2.10482	2.13085	2.09504	2.10182	2.08161	2.10081	2.08449	2.09861	2.09785	2.11903	2.10978	2.07779	2.09465	2.13878	2.12139	2.11836	2.11219	2.09626	2.09599
53.0902		2.10065	2.08419	2.10012	2.09068	2.08037	2.12804	2.12436	2.10528	2.12738	2.09222	2.10176	2.09849	2.13413	2.11484	2.12983	2.11234	2.05896	2.10535	2.10596	2.10044	2.10983	2.09168	2.11896	2.1045	2.12216	2.13144	2.10647	2.12651	2.10166	2.10367	2.12951	2.09373	2.1004	2.08036	2.09941	2.08321	2.09731	2.09657	2.11774	2.10859	2.07652	2.09324	2.13752	2.12019	2.117	2.1109	2.095	2.09477
53.4924		2.09934	2.08281	2.09873	2.0895	2.0791	2.12676	2.12311	2.1041	2.12608	2.09093	2.10039	2.09731	2.13272	2.11361	2.12856	2.1111	2.05757	2.10413	2.10476	2.09922	2.1085	2.0905	2.11779	2.10301	2.12087	2.13014	2.1051	2.12519	2.10038	2.10251	2.1282	2.09243	2.09901	2.07914	2.09803	2.08193	2.09603	2.0953	2.11643	2.10737	2.07524	2.09186	2.13625	2.11897	2.11564	2.10963	2.09373	2.09355
53.8946		2.09805	2.08148	2.09749	2.08836	2.07781	2.12551	2.12186	2.10291	2.12478	2.08965	2.09902	2.09608	2.1313	2.11236	2.12728	2.10987	2.05621	2.10291	2.10354	2.09798	2.10715	2.08936	2.11658	2.10161	2.11964	2.12887	2.10374	2.12387	2.09912	2.10131	2.1269	2.09112	2.09765	2.07793	2.09665	2.08064	2.09477	2.09404	2.11511	2.10609	2.07394	2.09052	2.13496	2.11774	2.11426	2.10837	2.09247	2.09233
54.2968		2.09678	2.08021	2.09642	2.08725	2.07648	2.12427	2.1206	2.1017	2.12349	2.08837	2.09766	2.09479	2.12987	2.11107	2.12599	2.10864	2.05489	2.10166	2.10228	2.09673	2.10577	2.08825	2.11531	2.10032	2.11846	2.12764	2.10237	2.12255	2.09786	2.10006	2.12561	2.08979	2.09632	2.07673	2.09526	2.07934	2.09353	2.09279	2.11375	2.10476	2.07261	2.0892	2.13364	2.11647	2.11287	2.10711	2.09118	2.09111
54.699		2.09552	2.07899	2.09553	2.08616	2.07512	2.12303	2.11933	2.10046	2.12219	2.08709	2.0963	2.09343	2.12842	2.10974	2.12468	2.10741	2.0536	2.10039	2.10099	2.09545	2.10434	2.08717	2.11397	2.09915	2.11733	2.12644	2.10099	2.12121	2.09661	2.09875	2.12433	2.08844	2.09503	2.07554	2.09386	2.07804	2.09231	2.09156	2.11235	2.10335	2.07124	2.08791	2.13229	2.11514	2.11146	2.10586	2.08989	2.08988
55.1012		2.09426	2.07782	2.09481	2.0851	2.07372	2.12179	2.11804	2.09918	2.12089	2.08582	2.09493	2.092	2.12696	2.10836	2.12335	2.10617	2.05235	2.0991	2.09965	2.09414	2.10288	2.08613	2.11256	2.09814	2.11626	2.12527	2.0996	2.11986	2.09536	2.09737	2.12307	2.08708	2.09378	2.07434	2.09244	2.07672	2.0911	2.09034	2.11091	2.10186	2.06982	2.08665	2.13091	2.11376	2.11004	2.10461	2.08857	2.08864
55.5034		2.09301	2.07671	2.09426	2.08404	2.07229	2.12054	2.11674	2.09785	2.1196	2.08454	2.09356	2.09049	2.12548	2.10693	2.12199	2.10492	2.05114	2.09777	2.09828	2.09279	2.10136	2.08511	2.11106	2.09727	2.11522	2.12413	2.0982	2.11851	2.09412	2.09592	2.12181	2.08569	2.09257	2.07314	2.091	2.0754	2.08991	2.08915	2.10943	2.10031	2.06836	2.08541	2.1295	2.11233	2.1086	2.10335	2.08723	2.0874
55.9056		2.09175	2.07565	2.09385	2.083	2.07084	2.11928	2.11544	2.0965	2.11831	2.08325	2.09217	2.08891	2.12398	2.10546	2.12061	2.10366	2.04997	2.09643	2.09687	2.09141	2.09981	2.08412	2.1095	2.09654	2.1142	2.12301	2.09679	2.11715	2.09288	2.09442	2.12056	2.08428	2.0914	2.07193	2.08953	2.07408	2.08873	2.08797	2.10793	2.09869	2.06686	2.0842	2.12806	2.11085	2.10715	2.10208	2.08588	2.08614
56.3078		2.09049	2.07462	2.09353	2.08195	2.06937	2.11801	2.11414	2.09511	2.11705	2.08196	2.09078	2.0873	2.12248	2.10396	2.11922	2.10239	2.04882	2.09507	2.09543	2.09	2.09824	2.08315	2.10788	2.0959	2.1132	2.12192	2.09537	2.11578	2.09165	2.09288	2.11932	2.08287	2.09026	2.07071	2.08805	2.07276	2.08755	2.08681	2.10642	2.09703	2.06534	2.08301	2.1266	2.10934	2.10569	2.10081	2.08452	2.08489
56.71		2.08922	2.07362	2.09325	2.08089	2.0679	2.11675	2.11285	2.0937	2.1158	2.08067	2.08939	2.08565	2.12098	2.10245	2.11781	2.10112	2.04769	2.09371	2.09398	2.08858	2.09666	2.08219	2.10624	2.09531	2.1122	2.12085	2.09396	2.11443	2.09043	2.09133	2.11808	2.08147	2.08914	2.06948	2.08657	2.07146	2.08638	2.08565	2.10491	2.09535	2.06381	2.08184	2.12514	2.10782	2.10423	2.09953	2.08317	2.08365
57.1122		2.08794	2.07263	2.09296	2.07983	2.06643	2.11549	2.11158	2.09229	2.1146	2.07938	2.088	2.08402	2.11951	2.10095	2.11641	2.09986	2.04659	2.09237	2.09254	2.08716	2.09509	2.08124	2.10461	2.09473	2.1112	2.1198	2.09256	2.11309	2.08924	2.0898	2.11686	2.0801	2.08804	2.06825	2.08509	2.07018	2.08522	2.08449	2.10344	2.09368	2.06229	2.08067	2.12369	2.10632	2.1028	2.09827	2.08185	2.08241
57.5144		2.08667	2.07164	2.09261	2.07876	2.065	2.11425	2.11035	2.0909	2.11345	2.07811	2.08663	2.08242	2.11807	2.09949	2.11502	2.0986	2.04549	2.09106	2.09113	2.08576	2.09356	2.08028	2.10302	2.0941	2.11018	2.11876	2.09119	2.11178	2.08806	2.08831	2.11566	2.07876	2.08696	2.06703	2.08364	2.06894	2.08406	2.08334	2.10202	2.09207	2.06081	2.07951	2.12226	2.10487	2.10138	2.09703	2.08056	2.08121
57.9166		2.08542	2.07064	2.09216	2.07769	2.0636	2.11305	2.10914	2.08956	2.11234	2.07685	2.08529	2.08089	2.11669	2.09809	2.11366	2.09738	2.04441	2.08979	2.08977	2.08441	2.09209	2.07933	2.10151	2.09339	2.10915	2.11775	2.08986	2.11051	2.08691	2.0869	2.11448	2.07749	2.0859	2.06583	2.08223	2.06774	2.08293	2.0822	2.10066	2.09053	2.05939	2.07836	2.12087	2.1035	2.10001	2.09583	2.07931	2.08003
58.3188		2.0842	2.06964	2.09158	2.07662	2.06226	2.11188	2.10799	2.08828	2.11129	2.07563	2.084	2.07945	2.11537	2.09678	2.11235	2.09618	2.04334	2.08859	2.08848	2.08313	2.0907	2.07837	2.10009	2.09257	2.10811	2.11675	2.08857	2.10929	2.0858	2.08558	2.11333	2.07627	2.08484	2.06465	2.08088	2.06659	2.08181	2.08106	2.0994	2.08909	2.05804	2.07721	2.11954	2.1022	2.09869	2.09468	2.07812	2.0789
58.721		2.08301	2.06864	2.09087	2.07556	2.06099	2.11077	2.10688	2.08707	2.11028	2.07445	2.08276	2.07811	2.11412	2.09557	2.11109	2.09504	2.04228	2.08744	2.08729	2.08193	2.0894	2.07741	2.0988	2.09164	2.10707	2.11577	2.08734	2.10813	2.08472	2.08437	2.11222	2.07512	2.0838	2.0635	2.0796	2.06549	2.08072	2.07994	2.09821	2.08776	2.05677	2.07607	2.11828	2.101	2.09743	2.09358	2.07698	2.07782
59.1232		2.08186	2.06763	2.09003	2.07452	2.0598	2.1097	2.10582	2.08595	2.10931	2.07333	2.08157	2.0769	2.11293	2.09447	2.10989	2.09395	2.04123	2.08636	2.08619	2.08081	2.08819	2.07645	2.09762	2.0906	2.10604	2.1148	2.08617	2.10703	2.08368	2.08327	2.11114	2.07404	2.08276	2.0624	2.07839	2.06445	2.07967	2.07885	2.09712	2.08656	2.05557	2.07494	2.1171	2.09989	2.09624	2.09252	2.0759	2.0768
59.5254		2.08077	2.06662	2.08908	2.0735	2.05869	2.10868	2.10482	2.08491	2.10836	2.07227	2.08045	2.07581	2.11181	2.09346	2.10875	2.09291	2.04019	2.08533	2.0852	2.07979	2.08708	2.07549	2.09657	2.08948	2.10502	2.11383	2.08505	2.10598	2.08268	2.08226	2.11011	2.073	2.08174	2.06134	2.07725	2.06346	2.07865	2.07778	2.0961	2.08547	2.05445	2.07382	2.11599	2.09887	2.09512	2.09152	2.07486	2.07583
59.9276		2.07973	2.06561	2.08806	2.07252	2.05766	2.1077	2.10386	2.08396	2.10743	2.07127	2.07939	2.07482	2.11075	2.09254	2.10768	2.09193	2.03917	2.08436	2.08429	2.07885	2.08604	2.07454	2.09562	2.08832	2.10403	2.11287	2.08398	2.10499	2.08171	2.08133	2.10911	2.07201	2.08073	2.06031	2.07618	2.06251	2.07766	2.07676	2.09514	2.08448	2.0534	2.07272	2.11495	2.09791	2.09407	2.09054	2.07385	2.07491
60.3298		2.07874	2.06461	2.08699	2.07159	2.05669	2.10676	2.10295	2.08308	2.1065	2.07032	2.07839	2.07393	2.10974	2.09169	2.10667	2.091	2.03817	2.08343	2.08345	2.07797	2.08508	2.0736	2.09477	2.08713	2.10305	2.1119	2.08295	2.10405	2.08077	2.08047	2.10814	2.07105	2.07973	2.05932	2.07516	2.0616	2.07671	2.07577	2.09423	2.08358	2.05242	2.07165	2.11399	2.09702	2.09308	2.0896	2.07288	2.07403
60.732		2.0778	2.06361	2.08591	2.07069	2.05579	2.10585	2.10206	2.08226	2.10557	2.0694	2.07744	2.07311	2.10876	2.09088	2.10573	2.09011	2.03719	2.08254	2.08267	2.07715	2.08416	2.07267	2.09398	2.08596	2.10209	2.11093	2.08195	2.10316	2.07985	2.07964	2.10721	2.07011	2.07875	2.05836	2.07419	2.06072	2.0758	2.07482	2.09335	2.08273	2.05148	2.07061	2.11309	2.09616	2.09215	2.08866	2.07192	2.07319
61.1342		2.07689	2.06263	2.08484	2.06982	2.05494	2.10496	2.1012	2.08149	2.10464	2.06852	2.07653	2.07234	2.10781	2.0901	2.10483	2.08924	2.03623	2.08168	2.08192	2.07637	2.08327	2.07177	2.09325	2.08483	2.10115	2.10996	2.08098	2.10229	2.07895	2.07884	2.1063	2.06917	2.07778	2.05742	2.07325	2.05986	2.07491	2.0739	2.09249	2.08192	2.05058	2.0696	2.11224	2.09532	2.09127	2.08773	2.07098	2.07236
61.5364		2.076	2.06166	2.08381	2.06898	2.05411	2.10409	2.10034	2.08075	2.10372	2.06764	2.07566	2.0716	2.10687	2.08933	2.10397	2.08839	2.03529	2.08083	2.08117	2.07561	2.08239	2.07088	2.09255	2.08375	2.10023	2.10899	2.08004	2.10144	2.07806	2.07804	2.1054	2.06824	2.07684	2.0565	2.07233	2.05903	2.07405	2.07301	2.09163	2.08112	2.04972	2.06861	2.11142	2.0945	2.09042	2.08681	2.07005	2.07154
61.9386		2.07513	2.06072	2.08282	2.06815	2.0533	2.10323	2.09948	2.08002	2.1028	2.06676	2.07482	2.07085	2.10595	2.08856	2.10315	2.08755	2.03437	2.07999	2.08041	2.07485	2.0815	2.07002	2.09187	2.08275	2.09933	2.10801	2.07912	2.1006	2.07719	2.07725	2.10452	2.06731	2.07591	2.05561	2.07141	2.0582	2.07322	2.07214	2.09077	2.08032	2.04889	2.06766	2.11064	2.09368	2.0896	2.08589	2.06912	2.07071
62.3408		2.07428	2.05979	2.08189	2.06732	2.05249	2.10239	2.09862	2.0793	2.10189	2.06588	2.07402	2.0701	2.10505	2.08777	2.10234	2.08672	2.03347	2.07917	2.07963	2.0741	2.08062	2.06917	2.09119	2.08181	2.09843	2.10704	2.07822	2.09976	2.07632	2.07644	2.10365	2.06639	2.075	2.05473	2.07049	2.05738	2.07241	2.07129	2.08991	2.07951	2.04808	2.06673	2.10987	2.09285	2.08878	2.08499	2.06821	2.06987
62.743		2.07343	2.05889	2.08099	2.06648	2.05168	2.10156	2.09774	2.07857	2.10098	2.06499	2.07323	2.06933	2.10415	2.08698	2.10154	2.08588	2.0326	2.07834	2.07881	2.07334	2.07972	2.06835	2.0905	2.08093	2.09755	2.10607	2.07736	2.09892	2.07546	2.07563	2.10278	2.06548	2.07412	2.05387	2.06957	2.05656	2.07162	2.07045	2.08905	2.07869	2.04728	2.06582	2.10912	2.09202	2.08797	2.0841	2.06731	2.06901
63.1452		2.0726	2.05802	2.08012	2.06562	2.05086	2.10073	2.09685	2.07782	2.10009	2.0641	2.07247	2.06855	2.10327	2.08617	2.10074	2.08506	2.03173	2.07753	2.07797	2.07258	2.07882	2.06754	2.08981	2.08011	2.09667	2.10512	2.07652	2.09808	2.07462	2.07481	2.10191	2.06459	2.07326	2.05304	2.06864	2.05574	2.07084	2.06963	2.0882	2.07787	2.0465	2.06492	2.10836	2.0912	2.08716	2.08323	2.06644	2.06815
63.5474		2.07178	2.05718	2.07927	2.06474	2.05004	2.09991	2.09597	2.07706	2.0992	2.0632	2.07174	2.06776	2.10242	2.08536	2.09994	2.08425	2.03088	2.07672	2.0771	2.07181	2.07793	2.06676	2.0891	2.07932	2.09581	2.10419	2.07573	2.09724	2.0738	2.074	2.10105	2.06372	2.07241	2.05223	2.06772	2.05493	2.07008	2.06881	2.08736	2.07706	2.04574	2.06404	2.1076	2.09039	2.08633	2.08239	2.0656	2.0673
63.9496		2.07099	2.05636	2.07843	2.06386	2.04923	2.09911	2.09511	2.07628	2.09833	2.06232	2.07101	2.06698	2.10158	2.08455	2.09914	2.08345	2.03002	2.07593	2.07623	2.07105	2.07707	2.06601	2.08839	2.07853	2.09495	2.10328	2.07496	2.0964	2.073	2.07321	2.10019	2.06287	2.07159	2.05145	2.06682	2.05413	2.06934	2.06801	2.08655	2.07626	2.04499	2.06318	2.10685	2.08959	2.08549	2.08157	2.0648	2.06645
64.3518		2.07022	2.05558	2.07758	2.06299	2.04845	2.09831	2.09428	2.07548	2.09748	2.06147	2.0703	2.0662	2.10078	2.08376	2.09835	2.08267	2.02917	2.07515	2.07535	2.07029	2.07624	2.06528	2.08766	2.07775	2.09412	2.10239	2.07424	2.09557	2.07224	2.07243	2.09934	2.06205	2.07079	2.05068	2.06595	2.05335	2.06862	2.06722	2.08576	2.07551	2.04426	2.06234	2.10608	2.08883	2.08465	2.08078	2.06404	2.06563
64.754		2.06949	2.05481	2.07672	2.06212	2.04772	2.09752	2.0935	2.07469	2.09665	2.06064	2.06959	2.06546	2.1	2.08298	2.09758	2.0819	2.02832	2.07439	2.07449	2.06955	2.07546	2.0646	2.08694	2.07694	2.09331	2.10154	2.07354	2.09477	2.0715	2.07167	2.09851	2.06126	2.07	2.04994	2.06511	2.05259	2.06791	2.06645	2.08501	2.07479	2.04354	2.06153	2.10532	2.08811	2.08379	2.08001	2.06333	2.06484
65.1562		2.06879	2.05406	2.07587	2.06129	2.04703	2.09676	2.09277	2.07389	2.09586	2.05986	2.06888	2.06473	2.09926	2.08223	2.09682	2.08114	2.02747	2.07366	2.07365	2.06881	2.07473	2.06395	2.08622	2.07611	2.09252	2.10071	2.07287	2.094	2.07079	2.07094	2.0977	2.06049	2.06921	2.04921	2.06431	2.05185	2.06722	2.06569	2.0843	2.07413	2.04282	2.06075	2.10455	2.08744	2.08294	2.07927	2.06266	2.06409
65.5584		2.06812	2.05332	2.07502	2.06048	2.0464	2.09601	2.09211	2.07312	2.0951	2.05913	2.06818	2.06404	2.09855	2.0815	2.09609	2.0804	2.02663	2.07296	2.07284	2.06809	2.07404	2.06333	2.0855	2.07525	2.09175	2.09992	2.07221	2.09326	2.07011	2.07024	2.0969	2.05973	2.06844	2.04851	2.06356	2.05115	2.06655	2.06494	2.08363	2.0735	2.04212	2.06001	2.10379	2.08679	2.0821	2.07856	2.06204	2.06338
65.9606		2.06747	2.05259	2.07419	2.05971	2.04582	2.0953	2.09151	2.07237	2.09439	2.05845	2.06748	2.06337	2.09787	2.0808	2.09541	2.07967	2.02581	2.07227	2.07206	2.06738	2.0734	2.06275	2.0848	2.07436	2.09101	2.09915	2.07157	2.09254	2.06945	2.06958	2.09612	2.05899	2.06767	2.04783	2.06285	2.05047	2.06589	2.06421	2.08298	2.07292	2.04142	2.05929	2.10304	2.08618	2.08128	2.07787	2.06146	2.06272
66.3628		2.06686	2.05186	2.07337	2.05897	2.04529	2.09462	2.09096	2.07165	2.09371	2.05781	2.06681	2.06273	2.0972	2.08013	2.09476	2.07896	2.02502	2.0716	2.07132	2.06668	2.07278	2.06218	2.08411	2.07346	2.0903	2.09841	2.07093	2.09185	2.0688	2.06894	2.09535	2.05827	2.0669	2.04717	2.06218	2.04982	2.06523	2.0635	2.08236	2.07236	2.04073	2.05861	2.10231	2.08559	2.08049	2.07721	2.06092	2.06209
66.765		2.06625	2.05114	2.07257	2.05825	2.04478	2.09397	2.09043	2.07097	2.09307	2.05723	2.06615	2.06211	2.09654	2.07949	2.09416	2.07826	2.02426	2.07094	2.0706	2.06599	2.07218	2.06162	2.08343	2.07256	2.08962	2.09769	2.0703	2.09118	2.06815	2.06834	2.09461	2.05756	2.06613	2.04654	2.06154	2.04919	2.06456	2.0628	2.08177	2.07182	2.04004	2.05796	2.1016	2.08501	2.07974	2.07657	2.06043	2.0615
67.1672		2.06566	2.05041	2.07179	2.05755	2.0443	2.09336	2.08993	2.07032	2.09244	2.05667	2.06553	2.06151	2.09589	2.07887	2.09362	2.0776	2.02353	2.07027	2.06992	2.06533	2.07158	2.06106	2.08278	2.07168	2.08896	2.09698	2.06966	2.09052	2.0675	2.06777	2.09388	2.05686	2.06536	2.04593	2.06093	2.04859	2.06389	2.06213	2.0812	2.07128	2.03937	2.05731	2.10094	2.08444	2.07904	2.07595	2.05996	2.06092
67.5694		2.06508	2.04968	2.07101	2.05684	2.04381	2.09278	2.08941	2.06971	2.09182	2.05615	2.06494	2.06093	2.09525	2.07828	2.09312	2.07697	2.02283	2.0696	2.06926	2.06468	2.07097	2.06049	2.08214	2.07084	2.08833	2.09627	2.06901	2.08986	2.06686	2.06723	2.09318	2.05617	2.0646	2.04533	2.06033	2.048	2.06321	2.06148	2.08064	2.07074	2.03872	2.05667	2.10033	2.08387	2.0784	2.07535	2.05951	2.06036
67.9716		2.06449	2.04897	2.07024	2.05613	2.0433	2.09222	2.08887	2.06913	2.09121	2.05564	2.06438	2.06038	2.09461	2.0777	2.09266	2.07638	2.02215	2.06894	2.06863	2.06406	2.07035	2.05991	2.08152	2.07003	2.08772	2.09556	2.06836	2.0892	2.06621	2.06672	2.0925	2.05551	2.06385	2.04474	2.05976	2.04744	2.06253	2.06087	2.08009	2.0702	2.0381	2.05601	2.09977	2.08331	2.07781	2.07476	2.05908	2.05981
68.3738		2.06391	2.04826	2.06947	2.05542	2.04278	2.09167	2.0883	2.06856	2.09061	2.05513	2.06385	2.05985	2.09399	2.07715	2.09224	2.07584	2.02149	2.06827	2.06803	2.06347	2.06971	2.05931	2.08092	2.06927	2.08714	2.09484	2.06769	2.08855	2.06557	2.06624	2.09186	2.05488	2.06312	2.04414	2.05921	2.04689	2.06184	2.06029	2.07955	2.06965	2.03752	2.05534	2.09926	2.08275	2.07727	2.07418	2.05864	2.05926
68.776		2.06332	2.04758	2.06869	2.05471	2.04223	2.09113	2.08769	2.06801	2.09	2.05461	2.06334	2.05934	2.09338	2.07661	2.09183	2.07532	2.02084	2.06762	2.06745	2.06292	2.06906	2.05869	2.08034	2.06855	2.08658	2.09411	2.06703	2.08789	2.06496	2.06578	2.09123	2.05427	2.06241	2.04352	2.05867	2.04636	2.06116	2.05976	2.07901	2.0691	2.03697	2.05464	2.09881	2.08219	2.07677	2.07361	2.05817	2.05871
69.1782		2.06274	2.04691	2.06791	2.05401	2.04165	2.09058	2.08703	2.06746	2.08941	2.05409	2.06283	2.05886	2.09278	2.07609	2.09141	2.07483	2.02019	2.06698	2.06689	2.0624	2.0684	2.05806	2.07978	2.06784	2.08602	2.09337	2.06637	2.08724	2.06437	2.06536	2.09064	2.05369	2.06173	2.04287	2.05814	2.04584	2.06051	2.05926	2.07846	2.06855	2.03647	2.05391	2.09838	2.08164	2.07631	2.07304	2.05766	2.05817
69.5804		2.06215	2.04626	2.06714	2.05332	2.04106	2.09003	2.08634	2.06691	2.08884	2.05355	2.06233	2.05839	2.0922	2.07558	2.09097	2.07434	2.01954	2.06637	2.06635	2.06191	2.06773	2.05741	2.07924	2.06714	2.08544	2.09263	2.06573	2.0866	2.0638	2.06494	2.09006	2.05313	2.06107	2.04218	2.05763	2.04532	2.05987	2.05879	2.0779	2.06801	2.036	2.05317	2.09798	2.08109	2.07585	2.07246	2.0571	2.05763
69.9826		2.06158	2.04565	2.06638	2.05266	2.04044	2.08948	2.08562	2.06635	2.08828	2.05301	2.06183	2.05794	2.09165	2.07507	2.09049	2.07384	2.0189	2.06579	2.06582	2.06143	2.06707	2.05676	2.07871	2.06642	2.08485	2.0919	2.06511	2.08598	2.06326	2.06454	2.08949	2.05259	2.06043	2.04147	2.05712	2.0448	2.05928	2.05835	2.07732	2.06748	2.03556	2.05242	2.09758	2.08053	2.0754	2.07188	2.05649	2.0571
70.3848		2.06101	2.04505	2.06566	2.05202	2.03982	2.08892	2.08489	2.06577	2.08774	2.05247	2.06131	2.05749	2.0911	2.07458	2.08996	2.07331	2.01827	2.06523	2.06529	2.06096	2.06642	2.05612	2.07819	2.06569	2.08423	2.09119	2.06452	2.08538	2.06274	2.06414	2.08893	2.05206	2.05982	2.04074	2.05661	2.04427	2.05872	2.05791	2.07673	2.06696	2.03514	2.05167	2.09717	2.07994	2.07493	2.07128	2.05583	2.05658
70.787		2.06044	2.04448	2.06498	2.05142	2.03919	2.08836	2.08418	2.06518	2.08721	2.05192	2.06078	2.05704	2.09056	2.07409	2.08938	2.07275	2.01765	2.06471	2.06478	2.06048	2.06577	2.05549	2.07768	2.06494	2.08358	2.09051	2.06395	2.08479	2.06222	2.06373	2.08837	2.05155	2.05922	2.04002	2.05609	2.04372	2.0582	2.05746	2.07613	2.06645	2.0347	2.05095	2.09674	2.07933	2.07443	2.07067	2.05516	2.05605
71.1892		2.05989	2.04392	2.06435	2.05084	2.03856	2.0878	2.0835	2.06458	2.08669	2.05138	2.06022	2.05658	2.09002	2.0736	2.08876	2.07215	2.01706	2.06421	2.06426	2.05997	2.06513	2.05488	2.07716	2.06418	2.08291	2.08989	2.06341	2.08422	2.06169	2.06331	2.08783	2.05105	2.05864	2.03934	2.05555	2.04315	2.05771	2.057	2.07551	2.06595	2.03425	2.05026	2.09628	2.07869	2.07389	2.07005	2.05448	2.05552
71.5914		2.05933	2.04339	2.0638	2.0503	2.03794	2.08726	2.08286	2.06397	2.08617	2.05084	2.05963	2.0561	2.08948	2.07311	2.0881	2.07153	2.01651	2.06374	2.06376	2.05944	2.0645	2.0543	2.07662	2.06344	2.08223	2.08932	2.06288	2.08366	2.06116	2.06288	2.08729	2.05057	2.05806	2.0387	2.055	2.04256	2.05725	2.05651	2.0749	2.06543	2.03377	2.04962	2.09579	2.07802	2.07334	2.06941	2.05383	2.05498
71.9936		2.05877	2.04289	2.06333	2.04977	2.03733	2.08673	2.08227	2.06336	2.08564	2.05029	2.05902	2.05561	2.08892	2.07261	2.08741	2.07089	2.01598	2.06329	2.06326	2.05887	2.06387	2.05375	2.07606	2.06275	2.08156	2.08881	2.06236	2.08311	2.06061	2.06243	2.08677	2.0501	2.05748	2.03814	2.05443	2.04194	2.0568	2.05599	2.07428	2.06488	2.03325	2.04903	2.09527	2.07734	2.07275	2.06878	2.05321	2.05441
72.3958		2.0582	2.0424	2.06294	2.04926	2.03673	2.0862	2.08174	2.06275	2.0851	2.04973	2.05838	2.05507	2.08835	2.07209	2.08671	2.07026	2.0155	2.06286	2.06276	2.05827	2.06324	2.05322	2.07546	2.06212	2.08091	2.08836	2.06182	2.08257	2.06006	2.06196	2.08625	2.04965	2.05689	2.03765	2.05384	2.04131	2.05635	2.05543	2.07366	2.06431	2.0327	2.04849	2.09473	2.07664	2.07216	2.06817	2.05263	2.05381
72.798		2.05761	2.04193	2.06264	2.04876	2.03616	2.08565	2.08124	2.06214	2.08454	2.04915	2.05772	2.0545	2.08776	2.07154	2.08599	2.06965	2.01503	2.06245	2.06226	2.05764	2.06261	2.0527	2.07483	2.06156	2.08029	2.08793	2.06127	2.08203	2.05951	2.06146	2.08574	2.04922	2.05629	2.03723	2.05325	2.04065	2.05588	2.05483	2.07305	2.06368	2.03211	2.04799	2.09418	2.07595	2.07155	2.06757	2.05208	2.05317
73.2002		2.05701	2.04148	2.06242	2.04826	2.03561	2.08508	2.08077	2.06153	2.08397	2.04856	2.05706	2.05387	2.08714	2.07095	2.08526	2.06907	2.01458	2.06205	2.06176	2.05698	2.06199	2.05218	2.07416	2.06109	2.0797	2.08751	2.06069	2.08148	2.05897	2.06095	2.08524	2.04878	2.05567	2.03685	2.05265	2.03997	2.05539	2.0542	2.07242	2.06301	2.0315	2.04751	2.0936	2.07525	2.07095	2.06701	2.05155	2.05251
73.6024		2.05641	2.04104	2.06226	2.04776	2.03506	2.08448	2.08032	2.06092	2.08339	2.04796	2.05642	2.05318	2.08649	2.07031	2.08451	2.06851	2.01412	2.06165	2.06126	2.05631	2.06136	2.05163	2.07347	2.06069	2.07915	2.08709	2.06009	2.08092	2.05844	2.0604	2.08472	2.04834	2.05503	2.03651	2.05206	2.03927	2.05487	2.05354	2.0718	2.0623	2.03086	2.04703	2.09301	2.07456	2.07034	2.06647	2.05102	2.05184
74.0046		2.05582	2.04059	2.06214	2.04723	2.03452	2.08383	2.07986	2.0603	2.08282	2.04739	2.05581	2.05245	2.08582	2.06962	2.08375	2.06797	2.01364	2.06125	2.06075	2.05562	2.06075	2.05106	2.07277	2.06034	2.07861	2.08665	2.05948	2.08036	2.05795	2.05981	2.08418	2.04788	2.05438	2.03617	2.05146	2.03854	2.05432	2.05287	2.07118	2.06156	2.03021	2.04656	2.09241	2.07386	2.06972	2.06596	2.05047	2.05118
74.4068		2.05526	2.04014	2.06204	2.04668	2.03398	2.08316	2.07939	2.05969	2.08229	2.04685	2.05525	2.05168	2.08513	2.06889	2.08297	2.06746	2.01314	2.06085	2.06023	2.05493	2.06015	2.05046	2.07208	2.06002	2.07809	2.08619	2.05886	2.07981	2.05749	2.05919	2.0836	2.04739	2.05373	2.03583	2.05086	2.03779	2.05374	2.05219	2.07058	2.06082	2.02956	2.04606	2.09181	2.07317	2.06911	2.06548	2.0499	2.05057
74.809		2.05475	2.03968	2.06192	2.04611	2.03342	2.08246	2.07891	2.05909	2.0818	2.04637	2.05474	2.05089	2.08443	2.06814	2.08219	2.06694	2.01261	2.06044	2.0597	2.05425	2.05957	2.04985	2.07142	2.05971	2.07757	2.08572	2.05825	2.07927	2.05705	2.05853	2.083	2.04687	2.05308	2.03547	2.05028	2.03704	2.05315	2.05151	2.07002	2.0601	2.02893	2.04555	2.09122	2.07247	2.06851	2.06503	2.04931	2.05001
75.2112		2.0543	2.03921	2.06176	2.04549	2.03284	2.08178	2.07842	2.0585	2.08138	2.04597	2.05427	2.0501	2.08372	2.0674	2.08142	2.06644	2.01206	2.06003	2.05917	2.05358	2.05903	2.04925	2.07081	2.05937	2.07707	2.08525	2.05767	2.07875	2.05664	2.05784	2.08236	2.04633	2.05246	2.03511	2.0497	2.03631	2.05256	2.05086	2.0695	2.05943	2.02831	2.04502	2.09065	2.07177	2.06792	2.0646	2.0487	2.04954
75.6134		2.0539	2.03872	2.06154	2.04484	2.03225	2.08114	2.07792	2.05796	2.08104	2.04563	2.05383	2.04934	2.08304	2.06668	2.08068	2.06593	2.01149	2.05964	2.05865	2.05294	2.05853	2.04869	2.07026	2.05901	2.07658	2.0848	2.05713	2.07826	2.05626	2.05713	2.08171	2.04577	2.05187	2.03473	2.04913	2.03561	2.05199	2.05024	2.06904	2.05884	2.02773	2.04448	2.0901	2.0711	2.06736	2.06418	2.0481	2.04916
76.0156		2.05355	2.03823	2.06124	2.04414	2.03166	2.08056	2.07742	2.05745	2.08077	2.04535	2.05339	2.04862	2.08238	2.06601	2.07997	2.06542	2.01092	2.05926	2.05814	2.05234	2.05808	2.04821	2.06976	2.0586	2.07613	2.08436	2.05665	2.0778	2.05589	2.05641	2.08103	2.04519	2.05133	2.03434	2.04859	2.03496	2.05145	2.04966	2.06864	2.05835	2.02719	2.04393	2.08958	2.07047	2.06685	2.06378	2.04754	2.04887
76.4178		2.05323	2.03774	2.06087	2.04341	2.03108	2.08006	2.07693	2.057	2.08055	2.04512	2.05294	2.04796	2.08176	2.06542	2.07931	2.06492	2.01036	2.05892	2.05764	2.05177	2.05767	2.04782	2.06932	2.05816	2.07571	2.08396	2.05624	2.07736	2.05552	2.05569	2.08036	2.04463	2.05084	2.03395	2.04806	2.03437	2.05095	2.04913	2.06829	2.05796	2.02668	2.0434	2.0891	2.0699	2.06638	2.06339	2.047	2.04867
76.82		2.05292	2.03725	2.06043	2.04264	2.03053	2.07964	2.07643	2.05658	2.08035	2.04489	2.05246	2.04738	2.08119	2.06492	2.07871	2.06444	2.00984	2.05859	2.05717	2.05126	2.0573	2.04752	2.06892	2.0577	2.07533	2.08359	2.05591	2.07692	2.05516	2.05498	2.07969	2.04407	2.05039	2.03355	2.04756	2.03386	2.0505	2.04865	2.06797	2.05767	2.02621	2.04288	2.08866	2.06941	2.06597	2.063	2.04651	2.04853
77.2222		2.0526	2.03679	2.05993	2.04185	2.03002	2.07928	2.07594	2.05619	2.08014	2.04464	2.05195	2.04687	2.08065	2.0645	2.07817	2.06397	2.00938	2.05829	2.05672	2.05079	2.05694	2.04731	2.06855	2.05723	2.07501	2.08326	2.05565	2.07649	2.05479	2.05431	2.07905	2.04354	2.04998	2.03314	2.04707	2.03342	2.05012	2.04821	2.06766	2.05746	2.02576	2.04238	2.08826	2.06901	2.06559	2.0626	2.04605	2.04844
77.6244		2.05226	2.03634	2.0594	2.04106	2.02957	2.07895	2.07544	2.05582	2.07987	2.04435	2.0514	2.04642	2.08014	2.06417	2.07769	2.06353	2.00898	2.058	2.0563	2.05036	2.05658	2.04715	2.06819	2.05677	2.07473	2.08297	2.05547	2.07603	2.05441	2.05368	2.07845	2.04303	2.0496	2.03271	2.0466	2.03305	2.04979	2.04782	2.06735	2.0573	2.02532	2.04191	2.08791	2.06872	2.06523	2.06218	2.0456	2.04838
78.0266		2.05189	2.03591	2.05885	2.04028	2.02917	2.07864	2.07494	2.05545	2.07952	2.04401	2.05083	2.04604	2.07964	2.06393	2.07726	2.0631	2.00864	2.0577	2.0559	2.04996	2.05619	2.047	2.06784	2.05632	2.07448	2.0827	2.05534	2.07556	2.05403	2.0531	2.07789	2.04256	2.04924	2.03226	2.04615	2.03275	2.04954	2.04746	2.06701	2.05714	2.02487	2.04146	2.0876	2.06853	2.06487	2.06175	2.04515	2.04831
78.4288		2.0515	2.03549	2.0583	2.03956	2.02884	2.0783	2.07444	2.05509	2.07908	2.04362	2.05025	2.04571	2.07915	2.06375	2.07687	2.06269	2.00838	2.0574	2.05553	2.04958	2.05576	2.04682	2.06751	2.05588	2.07426	2.08246	2.05525	2.07508	2.05363	2.05259	2.07738	2.04212	2.04889	2.03177	2.04572	2.03251	2.04933	2.04713	2.06664	2.05697	2.02441	2.04104	2.08733	2.06842	2.06448	2.0613	2.04469	2.04821
78.831		2.05109	2.03508	2.05776	2.03891	2.02855	2.07793	2.07395	2.05471	2.07854	2.04319	2.04967	2.04542	2.07866	2.06364	2.07651	2.06229	2.00815	2.05707	2.05517	2.0492	2.05529	2.04657	2.06718	2.05544	2.07404	2.08223	2.05516	2.0746	2.05323	2.05215	2.07695	2.04171	2.04857	2.03126	2.0453	2.03231	2.04917	2.04682	2.06624	2.05675	2.02395	2.04065	2.08709	2.06836	2.06404	2.06083	2.0442	2.04807
79.2332		2.05067	2.03467	2.05726	2.03835	2.02831	2.07749	2.07349	2.05433	2.07793	2.04274	2.0491	2.04514	2.07816	2.06357	2.07617	2.0619	2.00796	2.05672	2.05482	2.04881	2.05476	2.04624	2.06688	2.05501	2.07381	2.08199	2.05505	2.07412	2.05283	2.05177	2.07657	2.04135	2.04827	2.03072	2.04489	2.03213	2.04901	2.04653	2.06583	2.05647	2.0235	2.04029	2.08687	2.06834	2.06355	2.06034	2.04371	2.04785
79.6354		2.05023	2.03425	2.0568	2.03788	2.02809	2.077	2.07307	2.05395	2.07729	2.04228	2.04855	2.04486	2.07766	2.06354	2.07584	2.06151	2.00776	2.05632	2.05448	2.0484	2.0542	2.04583	2.06659	2.05456	2.07354	2.08171	2.05489	2.07367	2.05242	2.05145	2.07626	2.04102	2.04802	2.03016	2.0445	2.03196	2.04884	2.04625	2.06542	2.05614	2.02307	2.03995	2.08665	2.06831	2.06301	2.05984	2.04321	2.04754
80.0376		2.04978	2.03382	2.05639	2.0375	2.02789	2.07645	2.07271	2.05357	2.07665	2.04183	2.04802	2.04455	2.07716	2.0635	2.07551	2.06113	2.00753	2.05587	2.05414	2.04796	2.05362	2.04533	2.06631	2.05409	2.07324	2.08137	2.05467	2.07326	2.05201	2.05119	2.07597	2.0407	2.04782	2.0296	2.04411	2.03176	2.04862	2.04598	2.06501	2.05576	2.02269	2.03963	2.08642	2.06824	2.06244	2.05934	2.04275	2.04713
80.4398		2.04932	2.03339	2.05604	2.03719	2.02767	2.07587	2.07243	2.05317	2.07606	2.04139	2.04752	2.04422	2.07667	2.06345	2.07516	2.06076	2.00723	2.05536	2.0538	2.04751	2.05303	2.04476	2.06603	2.0536	2.07289	2.08096	2.05437	2.07288	2.0516	2.05096	2.07569	2.04039	2.04765	2.02907	2.04371	2.03152	2.04833	2.0457	2.06462	2.05535	2.02236	2.03931	2.08614	2.06812	2.06185	2.05884	2.04233	2.0466
80.842		2.04886	2.03296	2.05574	2.03691	2.02743	2.07527	2.07222	2.05276	2.07553	2.04096	2.04703	2.04386	2.0762	2.06334	2.07479	2.0604	2.00686	2.05476	2.05345	2.04703	2.05248	2.04415	2.06571	2.05309	2.07251	2.08048	2.054	2.07252	2.05119	2.05075	2.07537	2.04004	2.04752	2.02859	2.04329	2.03122	2.04797	2.04542	2.06424	2.05491	2.02209	2.03899	2.0858	2.06794	2.06128	2.05835	2.04195	2.04597
81.2442		2.04841	2.03254	2.05548	2.03665	2.02717	2.0747	2.07209	2.05233	2.07507	2.04053	2.04654	2.04349	2.07576	2.06314	2.0744	2.06006	2.00639	2.0541	2.0531	2.04656	2.05197	2.0435	2.06535	2.05259	2.07209	2.07994	2.05356	2.07218	2.05077	2.05055	2.07497	2.03966	2.04738	2.02818	2.04283	2.03086	2.04752	2.04511	2.06385	2.05446	2.02187	2.03865	2.0854	2.06768	2.06072	2.05786	2.04162	2.04527
81.6464		2.04798	2.03213	2.05524	2.03637	2.02688	2.07416	2.07202	2.05187	2.0747	2.04011	2.04607	2.04311	2.07536	2.06284	2.074	2.05976	2.00583	2.05336	2.05275	2.0461	2.05152	2.04283	2.06495	2.05209	2.07167	2.07936	2.05306	2.07183	2.05035	2.05035	2.07446	2.03922	2.04721	2.02785	2.04234	2.03045	2.04702	2.04479	2.06346	2.054	2.02168	2.03828	2.08493	2.06737	2.0602	2.05738	2.04131	2.04451
82.0485		2.04758	2.03174	2.055	2.03608	2.02655	2.0737	2.07197	2.05136	2.07439	2.03968	2.04559	2.04275	2.07498	2.06243	2.07359	2.05949	2.00517	2.05256	2.05239	2.04566	2.05114	2.04216	2.06451	2.05159	2.07126	2.07878	2.05253	2.07146	2.04992	2.05015	2.07382	2.03872	2.04697	2.0276	2.0418	2.03001	2.04648	2.04444	2.06305	2.05354	2.0215	2.03786	2.0844	2.067	2.0597	2.0569	2.041	2.04376
82.4507		2.04724	2.03137	2.05471	2.03576	2.0262	2.07331	2.07191	2.05083	2.07412	2.03927	2.04511	2.04242	2.07462	2.06192	2.0732	2.05926	2.00443	2.05175	2.05204	2.04525	2.05082	2.04152	2.06405	2.05108	2.07087	2.07821	2.05199	2.07104	2.04948	2.04995	2.07304	2.03819	2.04663	2.02741	2.04124	2.02956	2.04593	2.04407	2.06261	2.05308	2.0213	2.0374	2.08384	2.06661	2.05922	2.05644	2.04065	2.04303
82.8529		2.04694	2.03099	2.05432	2.03542	2.02582	2.073	2.07181	2.05027	2.07388	2.03888	2.04465	2.04211	2.07429	2.06133	2.07282	2.05909	2.00364	2.05095	2.05171	2.04489	2.05054	2.04092	2.06361	2.05054	2.07053	2.07766	2.05146	2.07057	2.04901	2.04974	2.07214	2.03765	2.04617	2.02726	2.04065	2.02912	2.04538	2.04367	2.06215	2.05263	2.02106	2.03689	2.08325	2.06619	2.05876	2.05599	2.04025	2.04235
83.2551		2.04666	2.0306	2.0538	2.03505	2.02543	2.07275	2.07163	2.04971	2.07362	2.03854	2.04419	2.04184	2.07395	2.06068	2.07246	2.05897	2.00281	2.05019	2.0514	2.04456	2.05028	2.04039	2.06321	2.04993	2.07023	2.07712	2.05094	2.07002	2.04852	2.04952	2.07114	2.03712	2.0456	2.02711	2.04007	2.02872	2.04485	2.04326	2.06168	2.05219	2.02078	2.03634	2.08265	2.06575	2.05829	2.05555	2.03978	2.04176
83.6573		2.04639	2.03017	2.05312	2.03464	2.02502	2.07252	2.07134	2.04916	2.07333	2.03824	2.04376	2.04157	2.07361	2.06001	2.0721	2.05888	2.002	2.0495	2.05115	2.04427	2.05003	2.03995	2.06286	2.04922	2.06995	2.07656	2.05046	2.06942	2.04798	2.04929	2.07008	2.03664	2.04491	2.02693	2.03948	2.02836	2.04435	2.04283	2.06121	2.05177	2.02044	2.03577	2.08204	2.0653	2.05782	2.05515	2.03924	2.04123
84.0595		2.0461	2.02969	2.05226	2.03417	2.02457	2.07227	2.07094	2.04865	2.073	2.03797	2.04334	2.04131	2.07324	2.05933	2.07173	2.05881	2.00124	2.04889	2.05095	2.044	2.04977	2.0396	2.06257	2.04842	2.06968	2.07596	2.05003	2.06875	2.04738	2.04902	2.06898	2.0362	2.04414	2.02671	2.03891	2.02803	2.04388	2.04239	2.06076	2.05136	2.02007	2.03521	2.08143	2.06483	2.05736	2.05476	2.03865	2.04078
84.4617		2.04578	2.02918	2.05126	2.03363	2.02408	2.07194	2.07043	2.04818	2.07265	2.03773	2.04293	2.04105	2.07283	2.05866	2.07133	2.05871	2.00058	2.04836	2.05083	2.04377	2.04947	2.03933	2.06231	2.04753	2.06937	2.07531	2.04964	2.06805	2.04673	2.04871	2.06789	2.03584	2.04332	2.02643	2.03833	2.02773	2.04344	2.04194	2.06035	2.05093	2.01967	2.03466	2.08082	2.06433	2.05691	2.0544	2.03802	2.04036
84.8639		2.04544	2.02865	2.05017	2.03302	2.02354	2.0715	2.06983	2.04777	2.07227	2.03748	2.0425	2.04076	2.07238	2.05801	2.07089	2.05858	2.00007	2.04791	2.05079	2.04356	2.04914	2.03911	2.06206	2.04661	2.06901	2.07462	2.04929	2.06735	2.04603	2.04833	2.0668	2.03552	2.0425	2.02609	2.03775	2.02745	2.04302	2.04149	2.05996	2.05046	2.01925	2.03413	2.08019	2.0638	2.05647	2.05404	2.03737	2.03996
85.2661		2.04508	2.02813	2.04905	2.03233	2.02291	2.07094	2.06919	2.0474	2.0719	2.03717	2.04205	2.04045	2.07186	2.05739	2.07042	2.05839	1.99971	2.04753	2.05081	2.04338	2.04879	2.03889	2.06179	2.04573	2.06855	2.07391	2.04894	2.06667	2.04528	2.04785	2.06574	2.03525	2.04171	2.02569	2.03717	2.02719	2.04261	2.04104	2.0596	2.04994	2.01882	2.03363	2.07955	2.06324	2.05604	2.0537	2.03673	2.03957
85.6683		2.04474	2.02765	2.04799	2.03159	2.0222	2.07025	2.06853	2.04707	2.07157	2.03677	2.04159	2.04011	2.07128	2.0568	2.06994	2.05812	1.99951	2.04722	2.05087	2.04322	2.04843	2.03862	2.06146	2.04497	2.06799	2.07324	2.04857	2.06605	2.04453	2.04727	2.0647	2.035	2.04097	2.02522	2.03658	2.02696	2.04219	2.04058	2.05923	2.04935	2.0184	2.03315	2.0789	2.06267	2.05561	2.05334	2.03609	2.03917
86.0705		2.04443	2.02723	2.04706	2.03085	2.0214	2.06946	2.06789	2.04675	2.07129	2.03626	2.04113	2.03971	2.07063	2.05623	2.06947	2.05777	1.99944	2.04696	2.05092	2.04307	2.04806	2.03826	2.06107	2.04437	2.0673	2.07267	2.04813	2.06549	2.04379	2.04658	2.06368	2.03474	2.04033	2.02468	2.03599	2.02675	2.04172	2.04012	2.05882	2.04869	2.01797	2.03266	2.07824	2.06209	2.05513	2.05297	2.03544	2.03876
86.4727		2.04414	2.02688	2.04633	2.03015	2.02049	2.06859	2.06729	2.04641	2.07107	2.03562	2.04071	2.03925	2.0699	2.05567	2.06904	2.05736	1.99943	2.04675	2.05092	2.0429	2.0477	2.03776	2.06059	2.04396	2.06648	2.07225	2.04756	2.06499	2.04308	2.04578	2.06267	2.03442	2.03977	2.02404	2.03541	2.02658	2.04117	2.03963	2.05832	2.04797	2.01752	2.03212	2.07757	2.06153	2.05457	2.05256	2.03478	2.03832
86.8749		2.04386	2.02659	2.04583	2.02952	2.01949	2.06769	2.06671	2.04605	2.07088	2.03483	2.04036	2.0387	2.0691	2.05511	2.06867	2.05689	1.9994	2.04657	2.05079	2.04269	2.04732	2.03714	2.06003	2.04374	2.06552	2.07199	2.04684	2.06452	2.04242	2.04487	2.06165	2.03403	2.03929	2.02331	2.03483	2.02643	2.0405	2.03911	2.05772	2.04721	2.01702	2.03152	2.07691	2.06102	2.05388	2.05211	2.03407	2.03786
87.2771		2.04353	2.02631	2.04557	2.029	2.01841	2.06679	2.06611	2.04565	2.07069	2.0339	2.0401	2.03807	2.06825	2.05451	2.06836	2.05637	1.99927	2.04641	2.0505	2.04239	2.0469	2.03641	2.05938	2.04364	2.06444	2.0719	2.04596	2.06403	2.04178	2.04389	2.06063	2.03351	2.03887	2.0225	2.03424	2.02629	2.03968	2.03854	2.05698	2.04641	2.01644	2.03083	2.07625	2.06057	2.05305	2.0516	2.0333	2.03735
87.6793		2.04309	2.02599	2.04552	2.02858	2.01726	2.06592	2.06544	2.04522	2.07048	2.03284	2.03992	2.03734	2.06735	2.05385	2.06809	2.05581	1.999	2.04623	2.05001	2.04195	2.04638	2.03563	2.05865	2.04358	2.06328	2.07191	2.04495	2.06349	2.04114	2.04283	2.05961	2.03283	2.03847	2.02163	2.03362	2.0261	2.03869	2.03791	2.05611	2.04557	2.01574	2.03004	2.07559	2.06019	2.05204	2.05102	2.03247	2.03677
88.0815		2.04249	2.0256	2.04563	2.02826	2.01607	2.06509	2.06466	2.04476	2.07021	2.03167	2.03975	2.03655	2.06643	2.05309	2.06784	2.05519	1.99853	2.04603	2.0493	2.04132	2.04571	2.03484	2.05782	2.04349	2.06207	2.07197	2.0439	2.06283	2.04047	2.04175	2.05859	2.03197	2.03806	2.02073	2.03294	2.02583	2.03753	2.03724	2.05514	2.04469	2.01491	2.02919	2.07492	2.05987	2.0509	2.05034	2.03161	2.03608
88.4837		2.04167	2.02508	2.04588	2.02798	2.01489	2.06432	2.06373	2.04429	2.06987	2.03041	2.03947	2.03571	2.06552	2.05224	2.06755	2.0545	1.99789	2.04577	2.0484	2.04048	2.04486	2.0341	2.0569	2.04332	2.06089	2.07198	2.04288	2.06206	2.03975	2.04066	2.05758	2.03092	2.0376	2.01983	2.03219	2.02544	2.03624	2.03654	2.05413	2.04374	2.01397	2.0283	2.07425	2.05961	2.04966	2.04954	2.03074	2.03526
88.8859		2.04063	2.02443	2.04622	2.02772	2.01377	2.06361	2.06264	2.04379	2.06945	2.02908	2.03895	2.03487	2.06464	2.05131	2.06721	2.05373	1.99711	2.04546	2.04733	2.0394	2.04382	2.03343	2.05591	2.04303	2.05982	2.07189	2.04198	2.06119	2.03894	2.0396	2.0566	2.02971	2.03708	2.01896	2.03136	2.02489	2.03486	2.03587	2.05313	2.04274	2.01295	2.02742	2.07355	2.05938	2.04841	2.04862	2.02994	2.0343
89.2881		2.0394	2.02365	2.0466	2.02742	2.01277	2.06297	2.06143	2.04328	2.06897	2.02775	2.03806	2.03403	2.06382	2.05033	2.06677	2.05287	1.99625	2.04508	2.04615	2.03812	2.04264	2.03285	2.0549	2.04264	2.05893	2.07167	2.04129	2.06027	2.03806	2.03858	2.05565	2.02838	2.03649	2.01815	2.03042	2.02417	2.03346	2.03528	2.0522	2.0417	2.01192	2.0266	2.07284	2.05917	2.04723	2.0476	2.02923	2.0332
89.6903		2.03802	2.0228	2.04701	2.02706	2.01196	2.06239	2.06014	2.04273	2.06844	2.02645	2.03673	2.03321	2.06308	2.04936	2.06619	2.05191	1.99538	2.04461	2.04488	2.03668	2.04137	2.03234	2.0539	2.04219	2.05827	2.0713	2.0408	2.05939	2.03711	2.03763	2.05469	2.027	2.03583	2.0174	2.0294	2.02329	2.03209	2.03481	2.05136	2.04065	2.01093	2.02588	2.07213	2.05893	2.04622	2.04649	2.02867	2.03201
90.0925		2.03659	2.02193	2.04738	2.02661	2.01137	2.06186	2.05888	2.04213	2.06783	2.02524	2.03498	2.03239	2.06241	2.04845	2.06545	2.05086	1.99456	2.04401	2.04359	2.03516	2.0401	2.03184	2.05298	2.04172	2.05785	2.07082	2.04051	2.05863	2.03614	2.03676	2.05371	2.02562	2.0351	2.01669	2.02832	2.02227	2.03081	2.03447	2.05063	2.03967	2.01007	2.02527	2.07143	2.05865	2.04543	2.04533	2.02823	2.03078
90.4947		2.03517	2.02111	2.04767	2.02607	2.01102	2.06138	2.05772	2.04146	2.06715	2.02419	2.03291	2.03153	2.06179	2.04763	2.06449	2.04974	1.99382	2.04325	2.0423	2.03366	2.03893	2.03131	2.05218	2.04125	2.05763	2.07029	2.04032	2.05807	2.03516	2.03594	2.05262	2.02433	2.03428	2.01601	2.02718	2.02115	2.02967	2.03425	2.04999	2.03879	2.00937	2.02474	2.07076	2.05829	2.04488	2.04418	2.02789	2.0296
90.8969		2.03386	2.0204	2.04782	2.02545	2.0109	2.06094	2.05674	2.04073	2.06633	2.02331	2.03074	2.03057	2.0612	2.04689	2.06331	2.04856	1.99318	2.04229	2.04104	2.03226	2.03791	2.03068	2.05154	2.04075	2.05754	2.06975	2.04014	2.05775	2.0342	2.03518	2.05138	2.02318	2.03338	2.01534	2.02603	2.01996	2.02869	2.03409	2.04941	2.03805	2.00885	2.02428	2.07014	2.0578	2.04454	2.04308	2.02756	2.02855
91.2991		2.0327	2.01984	2.04778	2.02474	2.01095	2.06051	2.05599	2.03992	2.06532	2.02262	2.0287	2.02945	2.06057	2.04619	2.06187	2.04734	1.99261	2.04113	2.03984	2.03105	2.03704	2.02988	2.05105	2.04014	2.05747	2.06922	2.03987	2.05765	2.03327	2.03447	2.04992	2.02219	2.03238	2.01465	2.02488	2.01876	2.0279	2.03389	2.04886	2.03744	2.0085	2.02384	2.06959	2.05713	2.04434	2.04207	2.02716	2.02768
91.7013		2.03172	2.01944	2.0475	2.02397	2.0111	2.06009	2.05549	2.03906	2.06408	2.02213	2.02705	2.02812	2.05986	2.04549	2.06021	2.0461	1.99206	2.03977	2.03873	2.03008	2.03629	2.02888	2.05065	2.03934	2.0573	2.0687	2.03945	2.05771	2.03235	2.0338	2.04823	2.02136	2.03127	2.01395	2.02375	2.0176	2.02732	2.03355	2.04833	2.03691	2.00826	2.02337	2.06909	2.05622	2.04418	2.04116	2.02659	2.027
92.1035		2.03089	2.01916	2.04697	2.02312	2.01127	2.0597	2.0552	2.03815	2.06257	2.02178	2.02598	2.02657	2.05902	2.04472	2.05837	2.04483	1.99148	2.03825	2.03771	2.02935	2.03556	2.02768	2.05028	2.03823	2.05692	2.06817	2.03884	2.05778	2.03144	2.03316	2.04632	2.02063	2.03008	2.0132	2.02266	2.01656	2.02693	2.03298	2.04784	2.03638	2.00805	2.02284	2.06861	2.05504	2.04395	2.04037	2.02583	2.02651
92.5057		2.03015	2.01895	2.04621	2.02218	2.01138	2.05934	2.05509	2.0372	2.06081	2.02153	2.02558	2.02483	2.05805	2.04383	2.05645	2.04352	1.99084	2.03667	2.03678	2.02884	2.03479	2.02632	2.04982	2.03676	2.05625	2.06755	2.03807	2.05773	2.03053	2.03253	2.04428	2.01996	2.02883	2.0124	2.02165	2.01567	2.02671	2.03214	2.04741	2.03575	2.00777	2.02222	2.06813	2.05358	2.04358	2.03967	2.02486	2.02615
92.9079		2.02942	2.01874	2.04529	2.02114	2.01137	2.05904	2.05508	2.03621	2.05885	2.02131	2.02582	2.02297	2.05697	2.04281	2.05457	2.04214	1.99011	2.03511	2.03591	2.0285	2.03388	2.02487	2.04921	2.03493	2.05526	2.0668	2.03719	2.05739	2.02964	2.0319	2.04219	2.01927	2.02759	2.01153	2.02074	2.015	2.02661	2.03103	2.04705	2.03495	2.00729	2.02151	2.06756	2.05188	2.043	2.03903	2.02374	2.02587
93.3101		2.02861	2.01845	2.04428	2.01996	2.01119	2.05881	2.05509	2.03518	2.0568	2.02105	2.02655	2.02111	2.0558	2.04171	2.05285	2.04067	1.98929	2.03369	2.03508	2.02824	2.03284	2.02344	2.04837	2.0328	2.05396	2.06588	2.03625	2.05665	2.02878	2.03121	2.04019	2.01849	2.0264	2.0106	2.01994	2.01457	2.02656	2.02973	2.04676	2.03394	2.00652	2.02067	2.06686	2.05004	2.0422	2.03843	2.02258	2.02561
93.7123		2.02765	2.01804	2.04327	2.01864	2.01083	2.05866	2.05505	2.03408	2.05479	2.02071	2.02755	2.01937	2.05462	2.0406	2.05143	2.03909	1.9884	2.03247	2.03423	2.02797	2.0317	2.02215	2.04732	2.03052	2.05242	2.06478	2.0353	2.05548	2.02801	2.03041	2.03838	2.01759	2.02534	2.00961	2.01928	2.01437	2.02647	2.02835	2.0465	2.03273	2.00536	2.01971	2.06597	2.04821	2.04121	2.03785	2.02149	2.02534
94.1145		2.02653	2.01747	2.04234	2.01719	2.01025	2.0586	2.05489	2.03291	2.053	2.02023	2.02855	2.01788	2.05349	2.03956	2.05036	2.03741	1.9875	2.03152	2.03333	2.02763	2.03056	2.02112	2.04611	2.02825	2.05074	2.06355	2.03439	2.05389	2.02737	2.02945	2.03684	2.01655	2.02444	2.0086	2.01874	2.01437	2.02631	2.027	2.0462	2.0314	2.00378	2.01861	2.06487	2.04654	2.04011	2.03728	2.02056	2.02505
94.5167		2.02529	2.01677	2.04154	2.01567	2.00945	2.05861	2.05457	2.0317	2.05156	2.0196	2.02935	2.01673	2.05246	2.03868	2.04968	2.03566	1.98663	2.03084	2.03236	2.02716	2.02954	2.02044	2.04488	2.02617	2.04908	2.06225	2.03352	2.05201	2.02692	2.02829	2.03562	2.01543	2.02372	2.00761	2.01829	2.01449	2.02606	2.02582	2.04576	2.03004	2.00179	2.01739	2.06359	2.04519	2.03897	2.0367	2.01988	2.02475
94.9189		2.02404	2.01596	2.04089	2.01414	2.00841	2.05868	2.05403	2.03049	2.05058	2.01882	2.02981	2.01594	2.05156	2.03804	2.04936	2.03392	1.98584	2.0304	2.03134	2.02655	2.02876	2.02018	2.04377	2.02442	2.04762	2.06097	2.0327	2.04999	2.0267	2.02697	2.03473	2.01428	2.02317	2.00668	2.01792	2.01464	2.02575	2.02491	2.04511	2.02875	1.9995	2.01607	2.06223	2.04427	2.03792	2.03611	2.01946	2.02445
95.3211		2.02291	2.01509	2.04037	2.01269	2.00716	2.05877	2.05325	2.02936	2.05011	2.01791	2.02987	2.01548	2.05079	2.03766	2.04932	2.03229	1.98514	2.03018	2.03033	2.02585	2.02827	2.02035	2.04293	2.02304	2.04652	2.05981	2.03194	2.04803	2.02672	2.02556	2.03416	2.01319	2.02274	2.00587	2.01756	2.01474	2.02546	2.0243	2.04421	2.02762	1.99707	2.0147	2.0609	2.04382	2.03706	2.03549	2.01926	2.02413
95.7233		2.02207	2.0142	2.03991	2.01139	2.00574	2.05885	2.0522	2.02841	2.0501	2.01691	2.02958	2.01529	2.05013	2.03754	2.04944	2.03089	1.98455	2.0301	2.02942	2.02512	2.0281	2.02093	2.04245	2.02202	2.04591	2.05882	2.03123	2.04632	2.02694	2.0242	2.03386	2.01225	2.02237	2.00521	2.01719	2.0147	2.02527	2.02401	2.04312	2.02667	1.99472	2.01335	2.05976	2.04381	2.03647	2.03486	2.01917	2.02376
96.1255		2.02166	2.01336	2.03941	2.01026	2.00422	2.05885	2.0509	2.02772	2.05045	2.01587	2.02899	2.01527	2.04953	2.03764	2.04959	2.02982	1.98402	2.03008	2.0287	2.02445	2.02818	2.02183	2.04234	2.02126	2.04582	2.05808	2.03057	2.045	2.02726	2.02307	2.0338	2.01152	2.02199	2.00471	2.01679	2.01448	2.02522	2.02398	2.04194	2.02587	1.99267	2.01215	2.0589	2.04417	2.03621	2.03421	2.01907	2.02331
96.5277		2.02175	2.01259	2.03878	2.0093	2.00269	2.05872	2.04938	2.02733	2.051	2.0148	2.02818	2.01531	2.04896	2.03792	2.04966	2.02914	1.98347	2.03005	2.02825	2.02392	2.02839	2.02293	2.0425	2.02061	2.04622	2.05758	2.02995	2.04414	2.02753	2.02234	2.03386	2.01105	2.02153	2.00433	2.01634	2.01407	2.02527	2.02409	2.04084	2.02516	1.9911	2.01118	2.05836	2.04477	2.03629	2.03357	2.01886	2.0227
96.9299		2.02234	2.01193	2.03793	2.00846	2.00126	2.05836	2.0477	2.02724	2.05159	2.01373	2.0272	2.01535	2.04837	2.03831	2.04954	2.02885	1.98282	2.02991	2.02811	2.0236	2.02861	2.02406	2.04276	2.01995	2.04695	2.05732	2.02936	2.0437	2.02758	2.02212	2.03393	2.01082	2.02094	2.00405	2.01585	2.0135	2.02531	2.0242	2.04002	2.02443	1.99012	2.01054	2.05808	2.04552	2.03663	2.03297	2.01849	2.0219
97.3321		2.02337	2.01143	2.0368	2.00766	1.99998	2.05772	2.04598	2.02739	2.05206	2.01268	2.02607	2.01538	2.04775	2.03881	2.0492	2.02884	1.98198	2.02955	2.02827	2.02348	2.02875	2.02506	2.04289	2.01917	2.04783	2.05727	2.02876	2.04355	2.02724	2.02245	2.03386	2.0108	2.02021	2.00381	2.01532	2.01279	2.02516	2.02416	2.03964	2.02358	1.98974	2.01029	2.05789	2.04633	2.03712	2.03247	2.01798	2.02088
97.7343		2.02468	2.01111	2.03541	2.00686	1.9989	2.05673	2.04434	2.02766	2.05228	2.01166	2.02478	2.01541	2.0471	2.03939	2.04863	2.02899	1.98092	2.02889	2.02869	2.02349	2.02872	2.02579	2.04271	2.01825	2.04869	2.05737	2.02813	2.0435	2.0264	2.02322	2.03348	2.01093	2.01937	2.00355	2.01474	2.01201	2.02464	2.02382	2.03982	2.02253	1.98985	2.01043	2.05757	2.04714	2.03762	2.03212	2.01746	2.01962
98.1365		2.02608	2.01101	2.03385	2.00609	1.998	2.05541	2.0429	2.02793	2.05219	2.01072	2.02334	2.01548	2.04647	2.04009	2.0479	2.02914	1.97968	2.02787	2.02928	2.02354	2.02854	2.02618	2.04211	2.01725	2.04939	2.05755	2.0274	2.04337	2.02499	2.02423	2.03265	2.01112	2.01847	2.00326	2.01406	2.01117	2.02362	2.02309	2.04056	2.02125	1.99026	2.01091	2.0569	2.04789	2.03795	2.03195	2.01708	2.01813
98.5387		2.0274	2.0111	2.03228	2.00544	1.99722	2.05383	2.04175	2.02809	2.05176	2.0099	2.02181	2.01565	2.04588	2.04089	2.04707	2.02917	1.97838	2.0265	2.02993	2.02352	2.02824	2.0262	2.04111	2.01627	2.04989	2.05772	2.0265	2.04299	2.02304	2.02518	2.03131	2.01129	2.01762	2.00291	2.01325	2.01028	2.02205	2.02193	2.04178	2.01974	1.99077	2.01165	2.05572	2.04847	2.03797	2.03196	2.01699	2.01643
98.9409		2.02844	2.01136	2.03091	2.00504	1.99645	2.05212	2.04094	2.02811	2.051	2.00929	2.0203	2.01593	2.04539	2.04178	2.04624	2.02902	1.97717	2.02485	2.03055	2.02333	2.02789	2.02592	2.0398	2.01546	2.05018	2.05779	2.02534	2.0423	2.02062	2.02575	2.02948	2.01137	2.01691	2.00253	2.01221	2.00932	2.02	2.02039	2.04326	2.01804	1.99115	2.0125	2.05399	2.04877	2.03756	2.03213	2.01723	2.01457
99.3431		2.02906	2.01168	2.02996	2.00506	1.99556	2.05049	2.04044	2.02797	2.04991	2.00895	2.01896	2.01631	2.045	2.0427	2.04548	2.02869	1.97624	2.02307	2.03105	2.02296	2.02752	2.02542	2.03835	2.0149	2.05027	2.05767	2.02384	2.04134	2.01783	2.02567	2.02728	2.01126	2.01643	2.00211	2.0109	2.00824	2.01763	2.01859	2.04472	2.01623	1.99126	2.01328	2.05178	2.04865	2.03665	2.03236	2.01776	2.01259
99.7453		2.02918	2.01194	2.0296	2.00558	1.99445	2.04909	2.04017	2.0277	2.04856	2.00889	2.01794	2.01673	2.04468	2.04355	2.04482	2.02822	1.97568	2.02132	2.03136	2.02243	2.02715	2.02481	2.03692	2.0146	2.05012	2.05728	2.0219	2.04017	2.01477	2.0248	2.02495	2.0109	2.0162	2.00168	2.0093	2.00697	2.01515	2.01667	2.04581	2.0144	1.99098	2.01381	2.04927	2.04802	2.03523	2.03257	2.01836	2.01058
100.147		2.02877	2.01201	2.02991	2.00658	1.993	2.04808	2.04002	2.02734	2.04702	2.00907	2.01735	2.01709	2.04433	2.04422	2.04425	2.02766	1.97552	2.01976	2.03139	2.02179	2.02674	2.02416	2.03561	2.01447	2.04963	2.05658	2.0195	2.03893	2.01151	2.02313	2.02277	2.01022	2.01618	2.00119	2.00748	2.00545	2.01279	2.01477	2.0462	2.01263	1.99027	2.01389	2.0467	2.04687	2.03336	2.03266	2.01875	2.00867
100.55		2.02786	2.01179	2.03088	2.00791	1.99118	2.04748	2.03989	2.02686	2.04541	2.00936	2.01716	2.01728	2.04382	2.04458	2.04371	2.02707	1.97563	2.01851	2.03109	2.02112	2.02617	2.02352	2.03446	2.01437	2.04867	2.05557	2.01664	2.0377	2.00812	2.0208	2.02104	2.00918	2.01623	2.0006	2.00557	2.00363	2.01075	2.01297	2.0456	2.01108	1.98912	2.01332	2.04429	2.04528	2.03117	2.03258	2.01863	2.00702
100.952		2.02655	2.01125	2.03235	2.00931	1.98897	2.04725	2.0397	2.02622	2.04392	2.00963	2.01718	2.01719	2.04298	2.04452	2.04312	2.02644	1.97582	2.01761	2.03042	2.02043	2.02533	2.02287	2.03347	2.01409	2.04716	2.05432	2.01343	2.03651	2.00464	2.01814	2.01999	2.0078	2.01619	1.99983	2.00377	2.00151	2.00915	2.01129	2.04389	2.00988	1.98758	2.01198	2.04227	2.04344	2.02886	2.03232	2.01784	2.0058
101.354		2.02499	2.01044	2.03406	2.01044	1.98647	2.04725	2.0394	2.02531	2.04273	2.0097	2.01711	2.01672	2.04172	2.044	2.04238	2.02578	1.97589	2.017	2.02938	2.01968	2.02413	2.02221	2.03261	2.0135	2.04511	2.05293	2.01002	2.0353	2.00117	2.01554	2.01978	2.00612	2.01589	1.99878	2.00234	1.99911	2.0081	2.00966	2.04111	2.00919	1.98579	2.00981	2.04076	2.04158	2.02664	2.03195	2.01638	2.00518
101.756		2.02335	2.00948	2.03571	2.01102	1.98386	2.04734	2.039	2.02405	2.04205	2.00948	2.01659	2.01583	2.04	2.043	2.04141	2.02508	1.97569	2.01657	2.02802	2.01879	2.02255	2.02152	2.0319	2.01258	2.04265	2.05158	2.0066	2.03396	1.99783	2.01346	2.02042	2.00426	2.01518	1.99743	2.00145	1.99652	2.00766	2.00799	2.03749	2.00918	1.98392	2.00689	2.03982	2.03995	2.02479	2.03154	2.01444	2.00527
102.158		2.02179	2.00853	2.03699	2.01088	1.98139	2.04745	2.03848	2.02244	2.04195	2.00899	2.01533	2.01453	2.03793	2.04159	2.04021	2.02437	1.97521	2.01616	2.02651	2.01768	2.02069	2.02086	2.03138	2.01147	2.04009	2.05044	2.0034	2.0324	1.99478	2.01229	2.02179	2.00237	2.01402	1.9958	2.00121	1.99386	2.00786	2.00617	2.03345	2.00994	1.98223	2.00338	2.03944	2.03871	2.02351	2.03117	2.01235	2.00613
102.561		2.02042	2.00778	2.03768	2.01001	1.97939	2.04757	2.03784	2.02055	2.0424	2.00831	2.01325	2.01287	2.03573	2.03987	2.03881	2.02374	1.9746	2.01563	2.02502	2.01634	2.01874	2.02028	2.03112	2.0104	2.03776	2.04966	2.00056	2.03056	1.99221	2.01234	2.02368	2.00063	2.01242	1.99399	2.00153	1.99126	2.00869	2.00416	2.02952	2.01144	1.98095	1.99961	2.03954	2.03794	2.02295	2.03092	2.01049	2.0077
102.963		2.01927	2.00736	2.03763	2.00852	1.97816	2.0478	2.03706	2.01861	2.04315	2.00764	2.01046	2.01095	2.03368	2.03797	2.03727	2.0233	1.97404	2.01491	2.02378	2.01489	2.01694	2.0199	2.03119	2.00972	2.03595	2.04934	1.99816	2.0285	1.99024	2.01366	2.02581	1.99915	2.01047	1.99218	2.00213	1.98884	2.01004	2.002	2.02622	2.01353	1.98027	1.99595	2.04	2.03759	2.0231	2.03079	2.00918	2.00981
103.365		2.01831	2.00733	2.03682	2.00664	1.9779	2.04828	2.03611	2.01688	2.04382	2.00715	2.00731	2.00892	2.03208	2.03605	2.03569	2.02315	1.97373	2.014	2.02296	2.01355	2.01551	2.01974	2.03154	2.00972	2.03482	2.04947	1.99615	2.02636	1.98893	2.01608	2.02788	1.99802	2.00832	1.9906	2.00258	1.98666	2.01171	1.9998	2.02398	2.01589	1.98027	1.99281	2.04068	2.03745	2.0238	2.03079	2.00858	2.01219
103.767		2.01745	2.00766	2.03538	2.00461	1.97864	2.04907	2.03501	2.0156	2.04392	2.00695	2.00426	2.00694	2.03109	2.03425	2.03412	2.0233	1.97373	2.013	2.02258	2.01261	2.01454	2.01975	2.03205	2.01057	2.03427	2.04991	1.99439	2.02436	1.9882	2.0191	2.0296	1.99723	2.00611	1.98942	2.00241	1.98474	2.01341	1.99769	2.02298	2.0181	1.98083	1.99055	2.04143	2.03724	2.02472	2.03088	2.00862	2.01446
104.169		2.01656	2.00818	2.0335	2.00269	1.98017	2.05014	2.03379	2.01492	2.043	2.00701	2.00177	2.00512	2.03076	2.03267	2.03257	2.02365	1.97397	2.01204	2.02253	2.01238	2.01391	2.0197	2.03247	2.01229	2.034	2.05043	1.99266	2.02272	1.98788	2.02204	2.03075	1.99669	2.00398	1.98875	2.00128	1.98296	2.01477	1.9958	2.02311	2.01974	1.98163	1.9894	2.0421	2.03659	2.02546	2.03104	2.00899	2.01622
104.572		2.01549	2.00865	2.03141	2.00101	1.98207	2.05126	2.03256	2.01476	2.04078	2.00711	2.00016	2.00362	2.03094	2.03132	2.03098	2.02396	1.97422	2.01131	2.02251	2.01303	2.01333	2.01923	2.03249	2.01469	2.0336	2.05073	1.99071	2.02157	1.98777	2.02419	2.03121	1.99627	2.00203	1.98855	1.99906	1.98118	2.01551	1.99419	2.02398	2.02048	1.98226	1.98941	2.04261	2.03517	2.02562	2.03126	2.00928	2.0171
104.974		2.01414	2.00876	2.02935	1.99964	1.98383	2.0521	2.0314	2.01488	2.03714	2.0069	1.99956	2.00252	2.0314	2.03011	2.02925	2.02392	1.97421	2.01096	2.02212	2.01452	2.01235	2.01795	2.03186	2.01743	2.0327	2.05054	1.98841	2.02091	1.98775	2.02501	2.03092	1.99584	2.00031	1.98868	1.99591	1.97925	2.01542	1.99287	2.02504	2.02019	1.98232	1.99041	2.04296	2.03274	2.0249	2.03151	2.00905	2.01687
105.376		2.01243	2.00822	2.02748	1.99853	1.98499	2.05231	2.03039	2.01493	2.03217	2.00599	1.99982	2.00192	2.03187	2.0289	2.02736	2.02325	1.97373	2.01116	2.02102	2.01663	2.01061	2.01552	2.03046	2.02016	2.03114	2.04972	1.9857	2.02061	1.98778	2.02426	2.02994	1.99536	1.99886	1.98893	1.99223	1.97706	2.01454	1.99185	2.0258	2.01898	1.98155	1.99209	2.04322	2.0292	2.02321	2.03177	2.00798	2.01545
105.778		2.01033	2.0068	2.02587	1.99757	1.98528	2.05163	2.02957	2.01461	2.0261	2.00408	2.00066	2.00187	2.03216	2.02748	2.02538	2.02183	1.97274	2.01201	2.01901	2.01896	2.00791	2.01179	2.02838	2.02255	2.02903	2.04829	1.98266	2.02049	1.98796	2.02203	2.02843	1.99485	1.99772	1.98911	1.98856	1.97467	2.01306	1.99119	2.02594	2.01713	1.97991	1.99408	2.04358	2.02467	2.0206	2.03199	2.00597	2.01297
106.18		2.0079	2.00442	2.02453	1.99659	1.98473	2.04998	2.02897	2.01383	2.01925	2.00111	2.00176	2.00242	2.03219	2.02574	2.02358	2.0197	1.97142	2.01357	2.01613	2.02111	2.00435	2.00689	2.02591	2.02435	2.02675	2.04645	1.97952	2.02039	1.98847	2.01873	2.02657	1.99445	1.99693	1.98914	1.98551	1.9723	2.01128	1.99107	2.02541	2.01505	1.97763	1.99609	2.04428	2.01948	2.0173	2.03209	2.00315	2.00972
106.583		2.00526	2.00116	2.02338	1.99548	1.98366	2.04748	2.02858	2.01275	2.012	1.99731	2.0029	2.00356	2.03202	2.02367	2.02237	2.01715	1.97006	2.01585	2.01271	2.02276	2.00028	2.00121	2.02351	2.02539	2.02488	2.04446	1.97653	2.02027	1.98945	2.0149	2.02458	1.99432	1.99662	1.98912	1.98365	1.97035	2.00957	1.9918	2.02442	2.01322	1.97507	1.99798	2.0456	2.0141	2.01361	2.03198	1.99985	2.00611
106.985		2.00264	1.99732	2.02234	1.99421	1.98253	2.04442	2.02839	2.01175	2.00474	1.99319	2.00409	2.00516	2.0318	2.02148	2.02221	2.0146	1.96903	2.01875	2.00921	2.02375	1.9963	1.99538	2.0217	2.02553	2.02402	2.04262	1.97397	2.02025	1.99092	2.01113	2.02263	1.99464	1.99696	1.98928	1.98338	1.96938	2.00825	1.99379	2.02325	2.01207	1.97271	1.99975	2.04773	2.00913	2.00989	2.03158	1.99658	2.00256
107.387		2.00035	1.99335	2.02137	1.99288	1.98183	2.04113	2.0284	2.01127	1.99788	1.98948	2.00551	2.007	2.03174	2.01952	2.02342	2.01257	1.96857	2.02204	2.00616	2.02405	1.99304	1.99018	2.02095	2.0247	2.02464	2.04109	1.97204	2.0206	1.99276	2.00798	2.02084	1.99546	1.99815	1.98992	1.98492	1.96993	2.00749	1.99737	2.02219	2.01188	1.97099	2.00152	2.05075	2.0052	2.00648	2.03084	1.99391	1.99943
107.789		1.99872	1.98982	2.02042	1.99166	1.98186	2.03797	2.02857	2.01164	1.99179	1.98701	2.00742	2.00873	2.032	2.01821	2.02602	2.01154	1.9687	2.02532	2.00397	2.02364	1.99112	1.98634	2.02157	2.02285	2.02691	2.03991	1.97079	2.02162	1.99472	2.0058	2.01923	1.99669	2.00033	1.99128	1.98819	1.97239	2.00733	2.00263	2.02137	2.0128	1.97028	2.0034	2.05454	2.00287	2.00365	2.02978	1.99241	1.997
108.191		1.99809	1.98731	2.01953	1.99077	1.98265	2.03517	2.02876	2.01284	1.98671	1.9865	2.00998	2.00993	2.0327	2.01793	2.02953	2.01186	1.96914	2.02811	2.00278	2.02249	1.99091	1.98442	2.02353	2.02006	2.03054	2.03897	1.97015	2.02349	1.9965	2.00472	2.01778	1.99804	2.00352	1.99339	1.99282	1.97674	2.00762	2.00926	2.02075	2.01467	1.97074	2.0054	2.05871	2.00243	2.0016	2.02846	1.99251	1.99536
108.594		1.99867	1.98629	2.01869	1.99035	1.98386	2.03288	2.02875	2.01443	1.98274	1.98835	2.01306	2.01024	2.03386	2.01882	2.03313	2.01363	1.96938	2.02994	2.00244	2.02046	1.99247	1.98457	2.02652	2.01653	2.03487	2.03811	1.96991	2.0262	1.99794	2.00457	2.01649	1.99913	2.00757	1.99601	1.99822	1.98248	2.00811	2.01644	2.02013	2.01715	1.97233	2.00738	2.06276	2.00385	2.00037	2.027	1.99436	1.99445
108.996		2.00055	1.98698	2.01792	1.99038	1.98491	2.0311	2.02826	2.01567	1.97977	1.99249	2.01617	2.0094	2.03545	2.02072	2.03582	2.01666	1.96888	2.03045	2.00253	2.01743	1.9955	1.98645	2.02997	2.0126	2.0391	2.03719	1.96988	2.02941	1.99907	2.00492	2.01541	1.99958	2.01212	1.99866	2.00365	1.98868	2.00852	2.02302	2.01928	2.01976	1.9748	2.00904	2.06614	2.00676	1.99993	2.02555	1.99778	1.99409
109.398		2.00363	1.98928	2.01724	1.99068	1.98515	2.02982	2.02707	2.01579	1.97755	1.99827	2.01846	2.00735	2.03737	2.02314	2.0369	2.02052	1.96733	2.02957	2.00262	2.01338	1.99944	1.98929	2.03326	2.00871	2.04258	2.03624	1.97	2.03269	2.00018	2.00521	2.01475	1.99918	2.0167	2.00073	2.00844	1.99433	2.00865	2.02785	2.0181	2.022	1.97772	2.01001	2.06844	2.01056	2.00018	2.02432	2.00222	1.99405
109.8		2.00765	1.99277	2.01669	1.9909	1.98414	2.029	2.02514	2.01432	1.97576	2.00465	2.01903	2.00419	2.03952	2.02545	2.03622	2.02467	1.96478	2.02753	2.00246	2.00848	2.00366	1.99217	2.03596	2.00532	2.04501	2.0354	1.97041	2.03561	2.00171	2.00494	2.01479	1.99803	2.02085	2.0018	2.01217	1.99867	2.00846	2.03012	2.01667	2.02357	1.98057	2.01001	2.06953	2.01466	2.0011	2.0235	2.00689	1.99417
110.202		2.01223	1.99682	2.01638	1.99068	1.98178	2.02866	2.0227	2.01129	1.97418	2.0105	2.01717	2.00024	2.04179	2.02707	2.03428	2.02865	1.96178	2.02478	2.00213	2.00319	2.00763	1.99438	2.03796	2.00275	2.04654	2.03485	1.97148	2.03802	2.00412	2.00383	2.01584	1.99654	2.02427	2.00174	2.01472	2.00144	2.00804	2.02965	2.01528	2.02439	1.98283	2.00892	2.06955	2.01864	2.00278	2.02334	2.01099	1.99445
110.605		2.0169	2.00072	2.01654	1.98976	1.97839	2.02894	2.02028	2.00722	1.97286	2.015	2.01258	1.99591	2.04404	2.02766	2.0321	2.03222	1.95922	2.02191	2.00211	1.99818	2.01099	1.99565	2.03957	2.0011	2.0476	2.03472	1.97379	2.04008	2.00775	2.00188	2.018	1.9954	2.0268	2.00079	2.0163	2.00283	2.0076	2.02688	2.01439	2.02457	1.9841	2.00685	2.06886	2.02238	2.00549	2.02402	2.01386	1.99506
111.007		2.02118	2.0038	2.01748	1.98807	1.97458	2.03001	2.01861	2.00297	1.97217	2.01781	2.00547	1.99173	2.04611	2.02716	2.0309	2.03539	1.95823	2.01955	2.00307	1.99428	2.01352	1.99611	2.04129	2.0002	2.04868	2.03491	1.97789	2.04225	2.01258	1.99944	2.02106	1.99546	2.02842	1.99945	2.01738	2.00331	2.00733	2.02269	2.01442	2.02435	1.98413	2.0041	2.06797	2.02591	2.00962	2.0256	2.01521	1.9963
111.409		2.02463	2.00551	2.01948	1.98573	1.97118	2.03204	2.01839	1.99947	1.97279	2.019	1.99662	1.98818	2.04774	2.0257	2.0317	2.03836	1.95981	2.0182	2.00565	1.9922	2.01509	1.99603	2.04371	1.99961	2.05017	2.03508	1.98415	2.04507	2.01826	1.99713	2.02432	1.9976	2.02907	1.99827	2.01852	2.00341	2.00735	2.01817	2.01566	2.02396	1.98296	2.00112	2.06742	2.02936	2.01543	2.02795	2.01506	1.99851
111.811		2.02688	2.00538	2.02269	1.98301	1.96899	2.03508	2.01995	1.99749	1.97557	2.01885	1.98721	1.98563	2.0486	2.0235	2.03475	2.04132	1.96445	2.01814	2.01005	1.99235	2.01562	1.99557	2.04713	1.99878	2.0521	2.03473	1.99242	2.04891	2.02402	1.99568	2.02683	2.00242	2.02855	1.9976	2.02019	2.00344	2.00756	2.01438	2.01799	2.02351	1.98082	1.99832	2.06767	2.0327	2.0228	2.03061	2.01375	2.0019
112.213		2.02766	2.00302	2.02693	1.98018	1.96859	2.03887	2.02292	1.99734	1.98124	2.01764	1.97879	1.98416	2.04833	2.02075	2.03924	2.04435	1.97177	2.01934	2.01577	1.99458	2.01508	1.99453	2.05134	1.9973	2.05414	2.03339	2.00185	2.05367	2.02898	1.99577	2.02768	2.01	2.02652	1.9974	2.02261	2.00332	2.00762	2.01206	2.02091	2.02299	1.97814	1.99594	2.06898	2.03574	2.03095	2.03288	2.0118	2.00649
112.616		2.02688	1.99819	2.03164	1.97749	1.97023	2.04273	2.02612	1.99867	1.98999	2.01546	1.97294	1.9835	2.04668	2.01753	2.04338	2.04725	1.98037	2.0215	2.02153	1.99809	2.0135	1.99245	2.05557	1.99498	2.05569	2.03086	2.01105	2.05865	2.03237	1.99779	2.0264	2.01956	2.02258	1.9972	2.02563	2.00261	2.00702	2.01143	2.02358	2.02228	1.97544	1.99389	2.07138	2.03803	2.03853	2.03398	2.00977	2.01198
113.018		2.02457	1.99084	2.03594	1.97512	1.97367	2.04562	2.02793	2.00056	2.00112	2.01227	1.97086	1.98317	2.04353	2.01389	2.04506	2.0496	1.98825	2.02415	2.02572	2.00166	2.01104	1.98877	2.05868	1.99192	2.05611	2.02732	2.01859	2.0627	2.03382	2.00154	2.02327	2.02947	2.01647	1.99626	2.0288	2.0007	2.00527	2.01209	2.02519	2.02124	1.97325	1.99181	2.07463	2.03909	2.04402	2.03326	2.00805	2.01782
113.42		2.02099	1.9812	2.03894	1.9733	1.97822	2.04642	2.02692	2.00183	2.01309	2.00796	1.97283	1.98265	2.03898	2.00996	2.04273	2.05092	1.99353	2.02674	2.02701	2.00409	2.00792	1.98318	2.05963	1.98844	2.05492	2.0233	2.02353	2.06468	2.03344	2.00617	2.01917	2.03773	2.00827	1.99392	2.03151	1.99718	2.0021	2.01308	2.02521	2.01982	1.97196	1.98913	2.07831	2.03855	2.04642	2.03042	2.00677	2.02338
113.822		2.01651	1.9698	2.03998	1.97242	1.98289	2.04427	2.02233	2.00159	2.02408	2.00255	1.97766	1.98165	2.0334	2.00599	2.03589	2.05088	1.99506	2.02876	2.02485	2.00473	2.0044	1.97589	2.0578	1.98498	2.05189	2.01951	2.02572	2.06385	2.03176	2.01037	2.01542	2.04265	1.99854	1.98978	2.03322	1.99209	1.99764	2.01323	2.02359	2.01811	1.97179	1.9853	2.08191	2.03636	2.04551	2.02549	2.00565	2.02808
114.224		2.01168	1.95743	2.03882	1.97314	1.98663	2.03889	2.01417	1.99946	2.03274	1.99633	1.98294	1.9803	2.02733	2.00243	2.02509	2.04943	1.99256	2.02974	2.0195	2.00356	2.0008	1.96779	2.05313	1.98191	2.04705	2.01659	2.0257	2.06015	2.02953	2.01282	2.01334	2.04336	1.98834	1.98393	2.03353	1.98596	1.9924	2.01163	2.0208	2.01641	1.97271	1.97994	2.08502	2.03284	2.04192	2.01882	2.00415	2.03156
114.627		2.00715	1.94519	2.03567	1.97642	1.98869	2.03056	2.0032	1.99566	2.03876	1.9899	1.98584	1.97909	2.0215	1.99982	2.01183	2.04676	1.98651	2.02921	2.01185	2.00116	1.99739	1.96045	2.04597	1.97946	2.04054	2.01499	2.02443	2.05411	2.02749	2.01269	2.01384	2.03979	1.97926	1.97687	2.03225	1.97973	1.98721	2.00803	2.01781	2.01522	1.97447	1.97293	2.08742	2.02857	2.0369	2.0109	2.00159	2.0337
115.029		2.00363	1.93448	2.03111	1.98334	1.98879	2.02011	1.99066	1.99079	2.04278	1.9841	1.98435	1.97884	2.01679	1.99868	1.99828	2.04322	1.97781	2.02681	2.00311	1.99832	1.99444	1.95615	2.03689	1.97763	2.03257	2.0148	2.023	2.0467	2.02618	2.00976	2.01705	2.03242	1.97334	1.96946	2.02935	1.97448	1.98312	2.00301	2.01597	2.01509	1.97672	1.96444	2.08904	2.02433	2.032	2.00228	1.99738	2.03452
115.431		2.00181	1.92697	2.026	1.99454	1.98718	2.00883	1.97831	1.9856	2.046	1.9799	1.97779	1.9804	2.01407	1.99929	1.98705	2.03912	1.96761	2.02235	1.99456	1.99586	1.99222	1.95765	2.02653	1.97623	2.02338	2.01581	2.02234	2.03913	2.02566	2.00446	2.0222	2.02203	1.9729	1.96278	2.02494	1.97115	1.98116	1.99783	2.01686	2.01652	1.97908	1.95488	2.09001	2.02083	2.02885	1.99353	1.99122	2.03408
115.833		2.00223	1.92447	2.02139	2.00931	1.98459	1.9984	1.96833	1.98089	2.04963	1.97812	1.9667	1.98436	2.01404	2.00153	1.98081	2.03466	1.9572	2.01596	1.98736	1.99428	1.99101	1.96762	2.01558	1.97489	2.01325	2.01765	2.02298	2.03264	2.02544	1.99764	2.02792	2.00952	1.97993	1.95804	2.01919	1.97014	1.98208	1.99419	2.02189	2.01975	1.98132	1.94484	2.09047	2.01862	2.02876	1.9852	1.98318	2.03245
116.235		2.00511	1.92852	2.01827	2.02491	1.98203	1.99094	1.96335	1.97743	2.05431	1.97911	1.95249	1.99071	2.01684	2.00476	1.98144	2.02987	1.9478	2.00815	1.98235	1.99364	1.99107	1.98696	2.00477	1.97319	2.00254	2.02005	2.02492	2.02823	2.02451	1.99042	2.0329	1.99587	1.99498	1.95635	2.0124	1.97099	1.986	1.99374	2.03153	2.02457	1.98334	1.93502	2.09054	2.01784	2.03216	1.97792	1.97367	2.02968
116.638		2.01026	1.93941	2.01734	2.0372	1.98044	1.98883	1.96612	1.97596	2.05957	1.9824	1.93705	1.99867	2.02172	2.00794	1.98885	2.02469	1.94041	1.99974	1.97991	1.99342	1.99254	2.01275	1.99494	1.97076	1.99166	2.02298	2.02766	2.02634	2.02172	1.98395	2.03655	1.98206	2.0158	1.95839	2.00494	1.97233	1.99211	1.99754	2.04432	2.03028	1.98517	1.92622	2.09023	2.01808	2.03809	1.97236	1.96335	2.02586
117.04		2.01705	1.95526	2.01864	2.04269	1.98035	1.99409	1.97859	1.9772	2.06383	1.98667	1.92251	2.00686	2.02696	2.01007	2.00028	2.01902	1.93554	1.99167	1.97981	1.99262	1.99534	2.0382	1.98701	1.96747	1.98108	2.02669	2.03037	2.02655	2.0162	1.97914	2.03913	1.96903	2.03745	1.96416	1.99726	1.9724	1.99868	2.00535	2.05657	2.03578	1.98696	1.91921	2.0895	2.01841	2.04433	1.96917	1.95304	2.02118
117.442		2.02458	1.97212	2.02151	2.04017	1.98142	2.00693	2.0002	1.98162	2.06507	1.99012	1.91106	2.01383	2.03049	2.01056	2.0112	2.01294	1.93301	1.98469	1.98134	1.99005	1.99911	2.05669	1.98182	1.9635	1.97124	2.03142	2.03233	2.02749	2.00761	1.97626	2.04138	1.95756	2.05491	1.97274	1.98973	1.96976	2.00361	2.01538	2.06398	2.03992	1.98888	1.91472	2.08827	2.01759	2.04839	1.96865	1.94354	2.01594
117.844		2.03186	1.98588	2.02481	2.03057	1.98235	2.0241	2.02663	1.98915	2.06192	1.99114	1.90467	2.01854	2.03071	2.00938	2.01789	2.00667	1.93183	1.97916	1.98358	1.98482	2.0032	2.0654	1.97981	1.95944	1.96261	2.03702	2.03315	2.02725	1.99613	1.97464	2.04397	1.94801	2.06551	1.98258	1.98256	1.96381	2.00531	2.02482	2.06374	2.04186	1.99111	1.91332	2.08646	2.01448	2.04869	1.97041	1.93549	2.01057
118.246		2.03806	1.99428	2.02756	2.01593	1.98118	2.0396	2.05131	1.99873	2.05415	1.98883	1.90474	2.02062	2.02695	2.00685	2.01917	2.0005	1.93052	1.97491	1.98573	1.97668	2.00686	2.06494	1.98066	1.95623	1.95574	2.04274	2.0329	2.02394	1.98226	1.97268	2.04701	1.94025	2.06918	1.99204	1.9757	1.95486	2.00316	2.03113	2.05541	2.04116	1.99366	1.91535	2.08404	2.00834	2.04501	1.97317	1.9293	2.00547
118.649		2.04254	1.99712	2.0293	1.99852	1.97607	2.04827	2.06904	2.00824	2.04249	1.98312	1.91176	2.02027	2.01941	2.0033	2.01636	1.99459	1.92761	1.97138	1.9874	1.96607	2.00943	2.05729	1.98308	1.95506	1.95151	2.04716	2.03196	2.01624	1.96662	1.96831	2.04978	1.9337	2.06709	1.99991	1.96883	1.94378	1.99748	2.03303	2.04008	2.03779	1.99634	1.92074	2.08104	1.99899	2.03802	1.97512	1.9251	2.00093
119.051		2.04486	1.9954	2.03023	1.98043	1.96593	2.04853	2.07787	2.0152	2.02816	1.97464	1.925	2.01815	2.00873	1.99881	2.01227	1.98874	1.92214	1.96793	1.98874	1.95403	2.01055	2.04444	1.98503	1.95694	1.9513	2.04866	2.03089	2.00363	1.94991	1.95978	2.05093	1.9275	2.06062	2.00562	1.96139	1.93171	1.98912	2.03054	2.01942	2.03193	1.99866	1.92885	2.07747	1.98672	2.02869	1.9747	1.9228	1.99692
119.453		2.04474	1.99031	2.03099	1.96354	1.95076	2.04172	2.07823	2.01792	2.01248	1.96452	1.9428	2.01525	1.99577	1.99309	2.01045	1.98229	1.91395	1.96423	1.9904	1.94212	2.01017	2.02803	1.98433	1.96205	1.957	2.04594	2.03025	1.98631	1.93287	1.94621	2.04902	1.92092	2.05093	2.00918	1.95272	1.91988	1.9791	2.02454	1.99511	2.02376	1.99996	1.93845	2.07336	1.97201	2.01787	1.97132	1.92218	1.99303
119.855		2.042	1.98287	2.03231	1.9495	1.93165	2.03029	2.0715	2.01617	1.99674	1.9544	1.96342	2.01276	1.98147	1.9856	2.01427	1.9743	1.90372	1.96051	1.9935	1.93245	2.00857	2.0095	1.97937	1.96899	1.97048	2.03837	2.03054	1.96504	1.9164	1.92756	2.04293	1.91366	2.03895	2.01096	1.94229	1.90948	1.96827	2.01629	1.9687	2.01336	1.99974	1.94784	2.06868	1.95537	2.00607	1.9656	1.92298	1.98852
120.257		2.03666	1.97376	2.03444	1.93973	1.91085	2.01673	2.05934	2.01112	1.98222	1.94656	1.9863	2.01187	1.96693	1.97571	2.02546	1.96386	1.89276	1.9575	1.99932	1.92812	2.0062	1.99033	1.96942	1.97472	1.9921	2.02624	2.03236	1.94105	1.90151	1.9044	2.03201	1.90602	2.02553	2.01146	1.92986	1.90166	1.9572	2.00701	1.94175	2.00069	1.99794	1.95525	2.06335	1.93724	1.99344	1.95926	1.92487	1.98255
[truncated: 12 more columns]

## Sheet: Transmission
	Sample No.	1	2	3	4	5	6	7	8	9	10	11	12	13	14	15	16	17	18	19	20	21	22	23	24	25	26	27	28	29	30	31	32	33	34	35	36	37	38	39	40	41	42	43	44	45	К1	К2	К3
	Preparation	ANLG	LYD	LYD	LYD	EUF	EUF	LYD	ANLG	EUF	EUF	EUF	EUF	LYD	ANLG	LYD	ANLG	EUF	EUF	LYD	EUF	ANLG	LYD	ANLG	LYD	ANLG	LYD	ANLG	LYD	EUF	EUF	ANLG	ANLG	ANLG	LYD	ANLG	EUF	ANLG	LYD	EUF	ANLG	ANLG	LYD	LYD	EUF	EUF	K	K	K
Wavelength, cm-1		Transmission Index
1.2066		0.588998	0.597529	0.614689	0.592451	0.604902	0.597913	0.603503	0.595761	0.595156	0.592249	0.558903	0.603636	0.605652	0.596512	0.57936	0.590294	0.575943	0.592842	0.606689	0.599593	0.583961	0.612922	0.587928	0.579961	0.595912	0.592251	0.585561	0.590504	0.592154	0.605015	0.597697	0.59022	0.594666	0.585486	0.58702	0.593721	0.599988	0.573715	0.581234	0.581513	0.586854	0.578698	0.594689	0.592018	0.582294	0.592648	0.607194	0.587047
1.60879		0.59679	0.604729	0.624243	0.603077	0.610758	0.6071	0.614951	0.60379	0.604248	0.600695	0.570087	0.613461	0.612864	0.605567	0.588782	0.599861	0.58484	0.601413	0.616493	0.609365	0.595432	0.625492	0.597364	0.587475	0.606989	0.602034	0.595673	0.600832	0.604072	0.615671	0.607936	0.600723	0.604458	0.595823	0.595134	0.60197	0.605784	0.585549	0.590866	0.590768	0.596961	0.589574	0.604183	0.600683	0.589615	0.600708	0.616731	0.600102
2.01099		0.600075	0.607152	0.627558	0.606666	0.611748	0.610277	0.618963	0.606406	0.607768	0.604064	0.574086	0.617467	0.615619	0.608838	0.591646	0.603251	0.587844	0.605015	0.619758	0.612172	0.599326	0.62976	0.600695	0.588665	0.611025	0.605643	0.599217	0.604648	0.608071	0.619485	0.611696	0.60498	0.608276	0.599707	0.598457	0.604977	0.607135	0.589519	0.593766	0.593843	0.600987	0.593677	0.607872	0.603865	0.591892	0.603641	0.619806	0.605498
2.41319		0.601373	0.607521	0.628144	0.607273	0.610835	0.610895	0.619804	0.606756	0.608881	0.605193	0.575141	0.618931	0.61651	0.609624	0.591797	0.603986	0.588333	0.606426	0.620265	0.612026	0.600004	0.630553	0.601443	0.587562	0.611979	0.606629	0.599956	0.605676	0.608806	0.62042	0.612676	0.606515	0.609484	0.600763	0.599704	0.605723	0.606658	0.59015	0.593904	0.594286	0.602338	0.594847	0.609058	0.60469	0.591999	0.604365	0.620128	0.60753
2.81539		0.601692	0.606963	0.627479	0.606589	0.609292	0.610394	0.619263	0.606148	0.608875	0.605259	0.575044	0.619183	0.616592	0.609291	0.590888	0.603534	0.587722	0.606752	0.619591	0.610647	0.599303	0.629887	0.60104	0.58592	0.611529	0.606434	0.59948	0.605457	0.608218	0.620099	0.612438	0.606789	0.609481	0.600523	0.59998	0.605438	0.605465	0.589393	0.592936	0.5936	0.602435	0.594699	0.609083	0.604452	0.591156	0.604082	0.619266	0.608007
3.21759		0.601485	0.605998	0.626242	0.605385	0.607698	0.609429	0.61816	0.605172	0.608323	0.604803	0.574618	0.618816	0.616337	0.608465	0.589696	0.602568	0.586668	0.606485	0.618449	0.608835	0.598082	0.628666	0.600126	0.584538	0.610458	0.605705	0.598527	0.604689	0.607181	0.619243	0.611699	0.606468	0.608902	0.599696	0.599775	0.604686	0.60406	0.588165	0.591607	0.59248	0.601931	0.593983	0.608547	0.60374	0.58994	0.60334	0.617938	0.607749
3.61979		0.600971	0.604867	0.624755	0.604016	0.606303	0.608294	0.616874	0.604095	0.607477	0.604091	0.57423	0.618095	0.615957	0.607432	0.588591	0.601403	0.585486	0.605852	0.617151	0.606964	0.596753	0.627286	0.598983	0.583748	0.609147	0.604731	0.597445	0.60369	0.606073	0.61816	0.610793	0.605858	0.608039	0.598612	0.599303	0.60373	0.602658	0.586905	0.590238	0.591248	0.601138	0.593054	0.607725	0.602829	0.588631	0.602394	0.616474	0.607125
4.02199		0.600248	0.603678	0.623151	0.602621	0.605183	0.607099	0.615557	0.603016	0.60643	0.603249	0.574007	0.617129	0.615533	0.606314	0.587728	0.600178	0.584318	0.604953	0.615807	0.605188	0.595508	0.625876	0.597716	0.583627	0.607769	0.603622	0.596384	0.602586	0.605023	0.616949	0.609855	0.605088	0.607009	0.597419	0.598636	0.602685	0.601326	0.585812	0.588934	0.590035	0.600195	0.592073	0.606725	0.601831	0.587359	0.60135	0.615002	0.606276
4.42418		0.599351	0.602462	0.621467	0.60123	0.604322	0.605854	0.614242	0.601951	0.605184	0.602333	0.573934	0.615935	0.615075	0.605138	0.587147	0.598933	0.583214	0.603822	0.614419	0.603552	0.594419	0.624431	0.596331	0.584109	0.606389	0.602388	0.595386	0.601405	0.604027	0.615598	0.608911	0.60419	0.605838	0.596167	0.597767	0.601576	0.60005	0.584959	0.587688	0.588871	0.599147	0.591101	0.605563	0.600774	0.586169	0.600234	0.613544	0.605225
4.82638		0.598275	0.601207	0.619683	0.599812	0.603655	0.604512	0.612893	0.600873	0.60369	0.601359	0.573918	0.614486	0.614554	0.603881	0.586821	0.597657	0.582175	0.602451	0.612935	0.60204	0.593496	0.62287	0.594788	0.585045	0.605008	0.600983	0.594432	0.600119	0.603015	0.614035	0.607928	0.603139	0.604502	0.594857	0.596641	0.600379	0.598779	0.584349	0.586435	0.587732	0.597984	0.590145	0.604199	0.599638	0.585064	0.599024	0.612066	0.603928
5.22858		0.596986	0.599874	0.617743	0.598306	0.603092	0.602994	0.611441	0.599734	0.601869	0.600317	0.573806	0.612721	0.613912	0.602489	0.586682	0.596305	0.58117	0.60081	0.611273	0.60061	0.59271	0.621078	0.593016	0.586231	0.603593	0.59933	0.593466	0.598669	0.601885	0.612157	0.606835	0.60188	0.602941	0.593464	0.59517	0.599034	0.597443	0.583952	0.585081	0.58656	0.596658	0.589184	0.60256	0.598375	0.584012	0.597668	0.610503	0.602305
5.63078		0.595424	0.598402	0.615566	0.596625	0.602519	0.6012	0.609789	0.59847	0.599623	0.599175	0.573416	0.610555	0.613073	0.600884	0.586629	0.594812	0.580149	0.598843	0.609335	0.599202	0.59201	0.618922	0.590928	0.587428	0.602082	0.597329	0.592406	0.596977	0.600518	0.609844	0.605537	0.600332	0.601075	0.591941	0.593244	0.597452	0.595959	0.583706	0.583519	0.585276	0.595096	0.588173	0.600549	0.596912	0.582963	0.596094	0.608768	0.600254
6.03298		0.593509	0.596706	0.613046	0.594664	0.6018	0.599016	0.607823	0.597007	0.59684	0.597877	0.57254	0.607883	0.61194	0.59897	0.586531	0.593089	0.579035	0.596476	0.607011	0.597739	0.591313	0.616261	0.588423	0.588357	0.600385	0.594867	0.591146	0.594949	0.598789	0.606972	0.603917	0.598394	0.598799	0.590224	0.590736	0.595522	0.594234	0.583518	0.581633	0.583782	0.593199	0.587047	0.598052	0.595157	0.581843	0.594207	0.606755	0.597658
6.43518		0.591138	0.594668	0.610047	0.592293	0.600765	0.596316	0.605407	0.595247	0.593405	0.596333	0.570964	0.604578	0.610391	0.596629	0.586216	0.591023	0.57772	0.593606	0.604177	0.596115	0.590499	0.612955	0.585392	0.588712	0.598383	0.591821	0.589556	0.592471	0.596563	0.603413	0.601837	0.595944	0.595987	0.58822	0.587513	0.593105	0.592161	0.58325	0.579296	0.581952	0.590845	0.585706	0.594949	0.592994	0.580549	0.591892	0.604331	0.594387
6.83738		0.588189	0.592142	0.606402	0.589359	0.599201	0.592967	0.602387	0.593066	0.589207	0.59441	0.568488	0.600502	0.608283	0.593722	0.58547	0.588475	0.576054	0.59011	0.600697	0.594183	0.5894	0.60887	0.581718	0.588159	0.595919	0.58807	0.587481	0.589416	0.593697	0.599053	0.59914	0.592839	0.592493	0.5858	0.583446	0.590046	0.589608	0.582706	0.576375	0.57963	0.587895	0.584004	0.591119	0.590279	0.578946	0.589016	0.601339	0.590311
7.23958		0.584533	0.588946	0.601918	0.585691	0.596851	0.588842	0.598597	0.590306	0.584161	0.591927	0.564959	0.595513	0.605456	0.590094	0.584028	0.585278	0.573844	0.585851	0.596428	0.591743	0.587792	0.603894	0.577288	0.586366	0.592796	0.583507	0.584748	0.585644	0.590053	0.593804	0.595658	0.588932	0.588157	0.582794	0.578435	0.586186	0.58642	0.581611	0.572732	0.576634	0.584197	0.58175	0.586461	0.586855	0.576859	0.58543	0.597596	0.585306
7.64178		0.580053	0.58489	0.596398	0.581122	0.593431	0.58384	0.593877	0.586783	0.57823	0.588661	0.560304	0.5895	0.601754	0.585598	0.5816	0.581258	0.570865	0.580704	0.591239	0.588548	0.585415	0.597965	0.572018	0.583043	0.588798	0.57806	0.58118	0.581024	0.585508	0.587627	0.591232	0.584084	0.582831	0.578999	0.572434	0.581384	0.582428	0.579627	0.568249	0.572767	0.579611	0.578708	0.580914	0.582557	0.574083	0.580992	0.59291	0.579287
8.04397		0.574669	0.5798	0.589679	0.575525	0.588678	0.577907	0.588111	0.582308	0.571444	0.584375	0.554557	0.582419	0.597053	0.580115	0.577909	0.576256	0.566896	0.574583	0.585041	0.584326	0.582002	0.591091	0.565871	0.578006	0.583718	0.571721	0.576633	0.575458	0.579988	0.580561	0.585748	0.578209	0.57641	0.574209	0.565486	0.575554	0.577472	0.576387	0.562852	0.567852	0.574038	0.574637	0.574482	0.577254	0.570408	0.575592	0.587126	0.572234
8.44617		0.56837	0.573575	0.581692	0.568849	0.582422	0.57107	0.581263	0.576732	0.563918	0.57887	0.547872	0.57433	0.591299	0.573602	0.572755	0.570177	0.561768	0.567487	0.577827	0.57884	0.577341	0.583371	0.558887	0.571238	0.577416	0.564558	0.571029	0.568918	0.573494	0.572729	0.579172	0.571302	0.568882	0.568263	0.557737	0.568699	0.571444	0.57157	0.556539	0.56178	0.567457	0.56934	0.567254	0.570885	0.565658	0.569188	0.580165	0.564226
8.84837		0.561228	0.566232	0.57252	0.561159	0.57465	0.563448	0.573411	0.569992	0.555843	0.572054	0.540502	0.565418	0.584536	0.566117	0.566087	0.563027	0.555422	0.559518	0.569695	0.571965	0.571338	0.574994	0.551192	0.562932	0.569879	0.556723	0.56439	0.561475	0.566117	0.564337	0.571582	0.563472	0.560361	0.561109	0.549439	0.560933	0.564329	0.565	0.5494	0.554565	0.559959	0.562734	0.559404	0.563499	0.559744	0.561839	0.572082	0.555457
9.25057		0.553401	0.557931	0.562423	0.55263	0.565561	0.555242	0.564753	0.562154	0.547455	0.563996	0.53275	0.555974	0.576909	0.557831	0.558044	0.554939	0.547944	0.550886	0.560855	0.563753	0.564055	0.566209	0.542987	0.553467	0.561255	0.548431	0.556851	0.5533	0.558038	0.555638	0.563171	0.554941	0.551094	0.552848	0.540903	0.55247	0.556241	0.556729	0.54161	0.546362	0.551739	0.554897	0.551161	0.555263	0.552708	0.553706	0.563081	0.546218
9.65277		0.545102	0.548961	0.551814	0.543526	0.555536	0.546704	0.555576	0.553421	0.538996	0.554941	0.524914	0.54635	0.568643	0.549004	0.54895	0.54616	0.539561	0.54187	0.551597	0.554454	0.555714	0.557283	0.534513	0.54335	0.551842	0.53992	0.548636	0.544647	0.549493	0.546888	0.554212	0.546008	0.541432	0.543747	0.532446	0.543591	0.547414	0.547066	0.533406	0.537459	0.543076	0.546077	0.542772	0.546448	0.544729	0.545032	0.55349	0.536847
10.055		0.536565	0.53968	0.541178	0.534149	0.545071	0.53808	0.546195	0.544093	0.530673	0.545264	0.517237	0.536888	0.559999	0.539935	0.539242	0.537002	0.530597	0.532769	0.54224	0.544472	0.546645	0.548449	0.526006	0.533107	0.542029	0.531414	0.540021	0.535797	0.540738	0.538304	0.54501	0.536985	0.531758	0.534181	0.524325	0.534587	0.53816	0.536515	0.525041	0.528216	0.53427	0.536638	0.534452	0.537367	0.536089	0.536099	0.543698	0.527666
10.4572		0.528003	0.530439	0.530965	0.524782	0.534659	0.529564	0.536893	0.534505	0.52263	0.535389	0.50988	0.527858	0.551227	0.530901	0.529379	0.52778	0.521407	0.523842	0.533064	0.534271	0.537219	0.539872	0.517661	0.523191	0.532207	0.523083	0.531279	0.52701	0.532003	0.530028	0.535839	0.528138	0.522412	0.524553	0.516692	0.525713	0.528807	0.525664	0.516746	0.518992	0.525589	0.526981	0.526354	0.528318	0.527114	0.527168	0.534071	0.518924
10.8594		0.519581	0.521523	0.521508	0.515651	0.524706	0.521279	0.527877	0.524961	0.514938	0.525693	0.502915	0.519423	0.542528	0.522117	0.519753	0.518757	0.512311	0.515275	0.524274	0.524271	0.527784	0.53164	0.50961	0.513921	0.522698	0.515038	0.52264	0.518483	0.523467	0.522126	0.526908	0.519649	0.51363	0.515211	0.509593	0.517153	0.519632	0.515058	0.508699	0.510078	0.517224	0.517463	0.518562	0.519531	0.518111	0.518446	0.524888	0.510761
11.2616		0.511411	0.513114	0.512979	0.506906	0.515471	0.513273	0.519266	0.515689	0.507609	0.516451	0.496339	0.511635	0.534041	0.513713	0.510638	0.510112	0.503558	0.507168	0.515983	0.51478	0.518612	0.52377	0.501915	0.505457	0.513711	0.507323	0.514274	0.510333	0.515246	0.514596	0.518342	0.511606	0.50553	0.506391	0.502982	0.509011	0.510829	0.505107	0.501016	0.501661	0.509278	0.508346	0.511091	0.511151	0.509319	0.510063	0.516311	0.503213
11.6638		0.503549	0.505287	0.505394	0.498618	0.50706	0.505543	0.511096	0.506827	0.500604	0.507814	0.490094	0.504448	0.525843	0.505742	0.502177	0.501935	0.495299	0.499537	0.508212	0.505969	0.509886	0.516229	0.494584	0.497812	0.50534	0.499931	0.506278	0.502601	0.507395	0.507387	0.510186	0.504013	0.498112	0.498206	0.496753	0.501312	0.502496	0.496046	0.493748	0.493824	0.501775	0.499778	0.503914	0.503235	0.500893	0.502076	0.508386	0.496228
12.066		0.496011	0.498025	0.498646	0.490793	0.499446	0.498054	0.503342	0.498432	0.493859	0.499817	0.484092	0.497748	0.517957	0.498192	0.494393	0.49424	0.487597	0.492339	0.500916	0.497876	0.501693	0.508954	0.487579	0.490878	0.497578	0.492821	0.498688	0.49527	0.499921	0.500423	0.502429	0.496817	0.491293	0.49066	0.490779	0.494027	0.494654	0.48794	0.486891	0.486555	0.494679	0.491805	0.49698	0.495771	0.492908	0.494485	0.501066	0.489694
12.4682		0.488781	0.491248	0.492544	0.483385	0.492502	0.490768	0.495947	0.490496	0.487298	0.492411	0.478232	0.491381	0.510373	0.491011	0.487224	0.486983	0.480438	0.48549	0.494003	0.490445	0.494042	0.501874	0.480838	0.484468	0.490353	0.485934	0.491491	0.488286	0.492794	0.49362	0.495018	0.489935	0.484938	0.483679	0.484932	0.487086	0.487266	0.480718	0.480399	0.479778	0.48792	0.484392	0.490229	0.488702	0.485378	0.487249	0.494241	0.483476
12.8704		0.481827	0.484841	0.486858	0.476323	0.486045	0.483652	0.488838	0.482977	0.480857	0.485494	0.47242	0.485189	0.503059	0.484129	0.480549	0.480091	0.473755	0.478891	0.487365	0.483554	0.486878	0.494927	0.474294	0.478359	0.483551	0.479211	0.48464	0.481575	0.48596	0.486908	0.487886	0.483276	0.478892	0.477144	0.47911	0.480402	0.480263	0.47421	0.4742	0.473381	0.481412	0.477453	0.483612	0.481946	0.478273	0.48031	0.48777	0.477433
13.2726		0.475109	0.478676	0.48136	0.469528	0.479876	0.476694	0.481948	0.475816	0.474488	0.478943	0.466584	0.479029	0.495979	0.477473	0.474227	0.473478	0.467449	0.472448	0.480897	0.477058	0.480115	0.48807	0.467884	0.472342	0.477051	0.472605	0.478073	0.475065	0.479363	0.48024	0.480967	0.476762	0.473005	0.470925	0.473242	0.473892	0.473569	0.468202	0.468211	0.467239	0.475079	0.470879	0.477095	0.47542	0.471539	0.473605	0.481512	0.471447
13.6748		0.46859	0.472641	0.475852	0.462927	0.473817	0.469897	0.475227	0.468953	0.468169	0.47264	0.460679	0.472803	0.4891	0.470984	0.468123	0.467066	0.461412	0.466092	0.474512	0.470813	0.47365	0.481285	0.461565	0.466259	0.470743	0.46609	0.471725	0.468696	0.472946	0.473599	0.47421	0.470335	0.467154	0.4649	0.467299	0.467493	0.46711	0.462473	0.462356	0.461243	0.468856	0.464563	0.470663	0.469052	0.465118	0.467082	0.475346	0.465433
14.077		0.462242	0.466655	0.470188	0.456474	0.467737	0.463277	0.468645	0.46234	0.461904	0.46649	0.454693	0.466463	0.4824	0.464625	0.462127	0.460796	0.45555	0.459784	0.468159	0.464704	0.467389	0.47458	0.455318	0.46003	0.464545	0.459661	0.46554	0.46243	0.466667	0.466998	0.467588	0.46397	0.461258	0.458973	0.461286	0.461169	0.460833	0.456834	0.456574	0.455311	0.462708	0.458419	0.46432	0.462794	0.458953	0.460704	0.46919	0.459347
14.4792		0.456044	0.460673	0.464293	0.450143	0.46157	0.456859	0.462195	0.455945	0.455718	0.46043	0.448645	0.46002	0.475869	0.458378	0.456171	0.454635	0.449792	0.453522	0.46182	0.458654	0.461264	0.467981	0.449145	0.453655	0.458412	0.453337	0.459479	0.456252	0.4605	0.460474	0.461098	0.457665	0.455279	0.453087	0.455237	0.454917	0.454702	0.451153	0.450828	0.449397	0.456623	0.452389	0.458086	0.456622	0.453001	0.454457	0.463006	0.453187
14.8814		0.449987	0.454691	0.458157	0.443939	0.455315	0.450666	0.455883	0.449753	0.449643	0.454435	0.442574	0.453529	0.469507	0.452245	0.45023	0.448573	0.444103	0.447332	0.45551	0.452631	0.455235	0.461519	0.443069	0.447204	0.452332	0.447145	0.453522	0.450169	0.454434	0.454073	0.454754	0.451444	0.449222	0.447218	0.449207	0.448757	0.448705	0.445367	0.445106	0.443495	0.450612	0.446451	0.451983	0.450536	0.447231	0.44834	0.456801	0.446986
15.2836		0.444067	0.448735	0.451831	0.437877	0.449023	0.444709	0.449727	0.443755	0.443711	0.448506	0.436527	0.447071	0.46332	0.446243	0.444314	0.442622	0.438474	0.441255	0.449269	0.446639	0.449293	0.455227	0.437118	0.440782	0.446322	0.441116	0.447664	0.444198	0.448473	0.447842	0.448581	0.445338	0.443128	0.441376	0.443252	0.442722	0.442843	0.439479	0.439414	0.437628	0.444698	0.440609	0.446032	0.444555	0.441622	0.442365	0.450612	0.4408
15.6858		0.438284	0.44285	0.445406	0.431982	0.442775	0.438987	0.443741	0.437953	0.437943	0.442668	0.430554	0.440737	0.457315	0.440388	0.438456	0.436801	0.43292	0.435338	0.443144	0.440713	0.44345	0.449126	0.431321	0.434496	0.440416	0.435273	0.441912	0.438365	0.442626	0.441813	0.442604	0.43938	0.437057	0.435592	0.43742	0.436847	0.437126	0.433541	0.433771	0.431838	0.43891	0.434883	0.440244	0.438703	0.436162	0.436546	0.444496	0.434694
16.088		0.43264	0.437084	0.438991	0.426273	0.436658	0.433485	0.437937	0.432344	0.432349	0.436953	0.424698	0.434601	0.451492	0.434696	0.432696	0.431132	0.427466	0.429615	0.437181	0.434898	0.437731	0.443224	0.425696	0.428431	0.434649	0.429628	0.436279	0.432688	0.436904	0.436002	0.436838	0.433594	0.431075	0.429906	0.431745	0.431158	0.431563	0.42763	0.428203	0.426169	0.433271	0.429301	0.434624	0.433003	0.430841	0.430896	0.438512	0.428726
16.4901		0.427135	0.431475	0.432689	0.420761	0.430742	0.428174	0.432316	0.426921	0.426926	0.431389	0.418992	0.428715	0.445849	0.429173	0.427072	0.425633	0.422136	0.424107	0.431414	0.429237	0.432159	0.437517	0.420254	0.422637	0.429051	0.42418	0.430776	0.42718	0.431319	0.430411	0.431288	0.427995	0.425241	0.424356	0.426245	0.425666	0.426162	0.421829	0.422732	0.420662	0.427798	0.423886	0.429162	0.42747	0.42565	0.425418	0.432707	0.422941
16.8923		0.421767	0.426051	0.426584	0.415446	0.425076	0.423021	0.42687	0.421673	0.421661	0.425996	0.413456	0.423101	0.440376	0.42382	0.421612	0.42031	0.416951	0.418816	0.425862	0.423764	0.426754	0.431993	0.414992	0.417126	0.42364	0.418916	0.425412	0.421845	0.425878	0.425024	0.425944	0.422582	0.4196	0.41897	0.420921	0.420371	0.420922	0.416209	0.417381	0.415343	0.422497	0.418648	0.423848	0.422111	0.420581	0.420109	0.42711	0.417367
17.2945		0.416535	0.420819	0.420733	0.410317	0.419678	0.417996	0.421588	0.416584	0.416539	0.420782	0.408105	0.417758	0.435064	0.418629	0.41633	0.415162	0.41192	0.413731	0.420531	0.418496	0.421527	0.426634	0.409904	0.411883	0.418418	0.413818	0.420195	0.416676	0.420587	0.419822	0.420791	0.417348	0.414178	0.413765	0.415764	0.41526	0.415836	0.410816	0.412165	0.410223	0.417366	0.413587	0.418669	0.416922	0.415622	0.414961	0.421735	0.412012
17.6967		0.411438	0.415777	0.41516	0.405359	0.414545	0.413072	0.416453	0.411638	0.411544	0.415744	0.402948	0.412665	0.429901	0.41359	0.411232	0.410181	0.407046	0.408831	0.415412	0.413435	0.41648	0.421425	0.404976	0.406875	0.41338	0.408866	0.415128	0.411665	0.41545	0.414784	0.415807	0.412279	0.408986	0.408743	0.410763	0.410316	0.410895	0.405674	0.407098	0.405302	0.412396	0.408693	0.413616	0.411896	0.410767	0.409964	0.416576	0.406874
18.0989		0.406478	0.410911	0.409867	0.400554	0.409654	0.408235	0.411455	0.406819	0.406668	0.410872	0.39799	0.407792	0.424879	0.408694	0.406315	0.405354	0.402324	0.40409	0.410492	0.408572	0.411608	0.416355	0.400199	0.402068	0.408511	0.404044	0.410212	0.4068	0.41047	0.409894	0.410974	0.407363	0.404018	0.403898	0.405907	0.40552	0.406087	0.400781	0.402188	0.400571	0.40758	0.40395	0.408685	0.407023	0.406008	0.405106	0.41162	0.401941
18.5011		0.401657	0.406205	0.404836	0.395886	0.404977	0.403482	0.406583	0.402115	0.401908	0.406152	0.393233	0.403106	0.419994	0.403935	0.401574	0.400671	0.397744	0.399488	0.405754	0.403887	0.406901	0.411417	0.395565	0.39743	0.403794	0.39934	0.405447	0.402073	0.405648	0.405141	0.406275	0.40259	0.399262	0.399217	0.401189	0.400858	0.401404	0.396123	0.397441	0.396013	0.402908	0.399339	0.403879	0.402292	0.401347	0.400381	0.406846	0.397197
18.9033		0.396981	0.401642	0.400043	0.391344	0.40048	0.39882	0.401834	0.39752	0.397266	0.401569	0.388675	0.398579	0.415243	0.399309	0.397	0.396122	0.393297	0.395005	0.40118	0.39936	0.402348	0.406614	0.391068	0.392936	0.399213	0.39475	0.400834	0.397478	0.400988	0.400519	0.4017	0.397954	0.394701	0.394688	0.396608	0.396319	0.39684	0.391674	0.392861	0.391613	0.398375	0.394844	0.399207	0.397699	0.396785	0.395787	0.402234	0.39263
19.3055		0.392452	0.397209	0.395458	0.386918	0.396134	0.394262	0.39721	0.393034	0.392752	0.397113	0.384314	0.394188	0.410629	0.394817	0.392586	0.391701	0.388974	0.390632	0.396755	0.394972	0.397936	0.40195	0.386707	0.388573	0.394755	0.390276	0.39637	0.393012	0.39649	0.396031	0.397242	0.393451	0.390318	0.390296	0.392166	0.391898	0.392393	0.387404	0.388446	0.387356	0.393976	0.390454	0.394678	0.393238	0.392328	0.391321	0.397766	0.388227
19.7077		0.388074	0.392898	0.391056	0.382607	0.391915	0.389824	0.392715	0.388658	0.388376	0.392777	0.380138	0.389919	0.406153	0.390462	0.388323	0.387403	0.384765	0.386364	0.392468	0.390704	0.393655	0.397433	0.382482	0.384331	0.390414	0.385923	0.392055	0.388676	0.39215	0.391678	0.392903	0.389084	0.386096	0.386032	0.387868	0.387597	0.388063	0.383285	0.384192	0.383229	0.38971	0.386161	0.390302	0.388909	0.387985	0.386988	0.393427	0.383979
20.1099		0.383848	0.388703	0.386818	0.378411	0.387804	0.385523	0.388354	0.384397	0.384147	0.388556	0.376135	0.385763	0.401814	0.386245	0.384202	0.38323	0.380667	0.382202	0.388308	0.386547	0.389494	0.393068	0.378392	0.380205	0.386187	0.381697	0.387884	0.384471	0.387964	0.387463	0.388683	0.384853	0.382019	0.38189	0.383716	0.383416	0.383853	0.379292	0.380092	0.379222	0.385573	0.381966	0.386084	0.384714	0.383763	0.38279	0.389209	0.379877
20.5121		0.379768	0.384624	0.382728	0.374331	0.38379	0.381368	0.384132	0.380257	0.38007	0.38445	0.372285	0.381717	0.397612	0.382169	0.380214	0.379178	0.376676	0.37815	0.384269	0.382492	0.385445	0.38886	0.374436	0.376195	0.382076	0.377604	0.38385	0.380397	0.383924	0.383389	0.384584	0.380759	0.378076	0.377867	0.379713	0.379359	0.379768	0.375404	0.376137	0.375328	0.381563	0.37787	0.382022	0.38065	0.379668	0.378727	0.385105	0.375917
20.9143		0.375829	0.380661	0.378781	0.370371	0.379868	0.377366	0.38005	0.376242	0.376149	0.380459	0.368566	0.377782	0.393539	0.37823	0.376349	0.37525	0.372792	0.374212	0.380346	0.378538	0.381501	0.384808	0.370611	0.372298	0.378083	0.373648	0.379945	0.376454	0.380021	0.379453	0.380608	0.376801	0.374257	0.373962	0.375856	0.375429	0.375809	0.371611	0.372312	0.371542	0.377678	0.373879	0.378113	0.376718	0.375702	0.3748	0.381113	0.372091
21.3165		0.372021	0.376816	0.374972	0.366532	0.376037	0.373514	0.376108	0.372354	0.372379	0.376585	0.364958	0.373958	0.38959	0.374425	0.372599	0.371442	0.369013	0.370394	0.376536	0.374687	0.377659	0.380906	0.36691	0.368515	0.374214	0.36983	0.376159	0.37264	0.376241	0.375652	0.376756	0.372975	0.370552	0.370176	0.372137	0.371627	0.371977	0.367908	0.368608	0.367861	0.373913	0.37	0.374344	0.372915	0.371867	0.371005	0.377233	0.368393
21.7187		0.368333	0.373091	0.3713	0.362815	0.372302	0.369805	0.372299	0.368594	0.368754	0.37283	0.361439	0.370247	0.385754	0.370747	0.368957	0.367752	0.365343	0.366698	0.372835	0.370943	0.373915	0.377145	0.363328	0.364847	0.370472	0.366144	0.372484	0.368949	0.372574	0.371976	0.373024	0.369276	0.366954	0.36651	0.368545	0.367952	0.368273	0.364294	0.365012	0.364285	0.370263	0.36624	0.3707	0.369235	0.368158	0.367336	0.373466	0.364813
22.1209		0.364753	0.369487	0.367762	0.35922	0.368669	0.366226	0.368618	0.364961	0.365263	0.369195	0.357996	0.366651	0.382022	0.367186	0.36542	0.364177	0.361784	0.363125	0.369243	0.367311	0.370271	0.373513	0.359856	0.361292	0.366861	0.362586	0.368909	0.365377	0.369009	0.368418	0.369409	0.365695	0.363457	0.362964	0.365067	0.364402	0.364692	0.360775	0.361515	0.360812	0.366721	0.362605	0.367166	0.365674	0.364572	0.363784	0.369815	0.361345
22.5231		0.361272	0.366002	0.364357	0.355747	0.365145	0.362765	0.365054	0.36145	0.361895	0.36568	0.354618	0.363171	0.378385	0.363736	0.361985	0.360712	0.358337	0.359674	0.365758	0.363797	0.366726	0.369996	0.356487	0.357852	0.36338	0.359148	0.365427	0.361916	0.365537	0.364969	0.365908	0.362224	0.360057	0.359537	0.361689	0.360971	0.361232	0.357359	0.358112	0.357442	0.363282	0.359098	0.363727	0.362224	0.361101	0.360344	0.36628	0.35798
22.9253		0.357883	0.362634	0.361078	0.352392	0.361737	0.359405	0.361599	0.358058	0.358639	0.362285	0.351299	0.359807	0.374837	0.360389	0.358651	0.357354	0.355004	0.356344	0.362381	0.360405	0.363285	0.366581	0.353216	0.354522	0.360027	0.355821	0.362034	0.358559	0.362151	0.36162	0.362515	0.358853	0.35675	0.356226	0.358398	0.357655	0.357886	0.354054	0.354798	0.354175	0.359942	0.35572	0.360371	0.358879	0.357739	0.357006	0.362863	0.35471
23.3275		0.354579	0.359378	0.357918	0.349152	0.358448	0.356134	0.358245	0.354779	0.355484	0.359006	0.348038	0.356559	0.371374	0.357137	0.355419	0.354098	0.351785	0.353128	0.35911	0.357136	0.359948	0.363257	0.350036	0.351299	0.356797	0.352599	0.358726	0.355302	0.358847	0.358365	0.359225	0.355575	0.353533	0.353028	0.355183	0.354449	0.354649	0.350864	0.35157	0.351012	0.356694	0.352468	0.357091	0.355633	0.35448	0.353763	0.359562	0.351531
23.7297		0.351357	0.356231	0.354869	0.346021	0.35528	0.352942	0.354983	0.351608	0.352421	0.355839	0.344837	0.353424	0.367994	0.353977	0.352286	0.35094	0.348676	0.350024	0.355943	0.353989	0.356718	0.360017	0.346946	0.348172	0.353683	0.349474	0.355503	0.352139	0.355622	0.355198	0.356035	0.352384	0.350404	0.349938	0.352037	0.351345	0.351515	0.347792	0.348427	0.34795	0.353534	0.349339	0.353882	0.352482	0.351318	0.350612	0.356374	0.348438
24.1319		0.348218	0.353183	0.351921	0.342995	0.352229	0.349822	0.351809	0.348539	0.349443	0.35278	0.341697	0.350401	0.364699	0.350905	0.34925	0.347877	0.345673	0.347024	0.352879	0.35096	0.353595	0.356855	0.343941	0.345133	0.350677	0.34644	0.352365	0.349065	0.352476	0.352118	0.352939	0.349274	0.347361	0.346947	0.348955	0.348337	0.348476	0.344835	0.345368	0.344988	0.35046	0.346324	0.350744	0.349419	0.348246	0.347547	0.353293	0.345428
24.5341		0.34516	0.350228	0.349062	0.340064	0.349288	0.346772	0.34872	0.345566	0.346543	0.349821	0.338622	0.347486	0.361489	0.34792	0.346306	0.344904	0.342768	0.344123	0.349914	0.34804	0.350576	0.353767	0.34102	0.342169	0.347767	0.343492	0.349312	0.346076	0.34941	0.349121	0.349933	0.346242	0.344402	0.34405	0.345938	0.345417	0.345526	0.341987	0.34239	0.342122	0.347469	0.343412	0.347681	0.346441	0.34526	0.344565	0.350312	0.342498
24.9363		0.342185	0.347357	0.346285	0.337223	0.346446	0.343792	0.345711	0.342684	0.343717	0.346953	0.335615	0.344671	0.358367	0.345018	0.343447	0.342017	0.339952	0.341313	0.347043	0.345219	0.347655	0.350755	0.338182	0.339274	0.344942	0.340627	0.346344	0.343168	0.346422	0.346207	0.347013	0.343288	0.341526	0.341236	0.342986	0.342579	0.342658	0.339238	0.339491	0.339346	0.344557	0.340591	0.344694	0.343542	0.342353	0.341664	0.347423	0.339649
25.3385		0.33929	0.344561	0.343578	0.334461	0.343692	0.340882	0.342782	0.339885	0.340961	0.344166	0.332676	0.341951	0.355332	0.342196	0.340666	0.339212	0.337213	0.338587	0.344259	0.342484	0.344825	0.347817	0.335422	0.33644	0.342191	0.337841	0.343461	0.340339	0.343514	0.343375	0.344174	0.34041	0.338728	0.338497	0.340105	0.339815	0.339864	0.336575	0.336666	0.336654	0.341722	0.337847	0.341789	0.340719	0.33952	0.33884	0.344616	0.336878
25.7407		0.336474	0.34183	0.340935	0.331771	0.341012	0.338046	0.33993	0.337164	0.338271	0.34145	0.329806	0.339316	0.352383	0.339452	0.337954	0.336484	0.33454	0.335937	0.341554	0.339821	0.342077	0.344955	0.332739	0.333666	0.339504	0.33513	0.340658	0.337583	0.340684	0.340622	0.341412	0.337607	0.336005	0.335826	0.337296	0.337117	0.337138	0.333985	0.333912	0.334039	0.338962	0.335169	0.338968	0.337966	0.336755	0.33609	0.341881	0.334183
26.1429		0.333735	0.339158	0.338349	0.329145	0.338395	0.335286	0.33715	0.334513	0.335643	0.338795	0.327008	0.336758	0.349519	0.336779	0.335304	0.333828	0.331921	0.333355	0.33892	0.337218	0.339399	0.342169	0.330128	0.330951	0.336873	0.332488	0.337931	0.334897	0.33793	0.337946	0.338722	0.334879	0.333352	0.333214	0.334563	0.33448	0.334474	0.331455	0.331222	0.33149	0.336273	0.332543	0.336229	0.335278	0.334052	0.33341	0.33921	0.331563
26.5451		0.331066	0.336537	0.335815	0.326574	0.33583	0.332601	0.334439	0.331926	0.333074	0.336191	0.324282	0.334265	0.346732	0.334173	0.332711	0.331236	0.329347	0.330833	0.336348	0.334664	0.336782	0.339456	0.327583	0.328297	0.33429	0.329912	0.335275	0.332276	0.335248	0.335343	0.336099	0.332222	0.330763	0.330656	0.331907	0.331899	0.331865	0.328974	0.328592	0.329001	0.333654	0.329962	0.33357	0.33265	0.331407	0.330794	0.336592	0.329012
26.9473		0.328463	0.333962	0.333329	0.324053	0.333308	0.32999	0.331792	0.329396	0.330561	0.33363	0.321627	0.331828	0.344018	0.331626	0.330169	0.328703	0.326812	0.328362	0.333831	0.332152	0.334216	0.336815	0.3251	0.325706	0.331752	0.327396	0.332682	0.329714	0.332632	0.332806	0.33354	0.329632	0.328233	0.328145	0.329325	0.329369	0.329306	0.326532	0.326017	0.326562	0.331099	0.327419	0.330987	0.330078	0.328815	0.328238	0.334023	0.326527
27.3495		0.32592	0.33143	0.330887	0.321576	0.330825	0.327447	0.329204	0.326916	0.3281	0.331108	0.319045	0.329438	0.341368	0.329131	0.327675	0.326223	0.32431	0.325936	0.331361	0.329675	0.331692	0.334241	0.322672	0.323176	0.329256	0.324933	0.330146	0.327206	0.330076	0.330329	0.331038	0.327104	0.325757	0.325678	0.326813	0.326887	0.326794	0.324123	0.323491	0.324167	0.328603	0.324911	0.328471	0.327556	0.326272	0.325734	0.331496	0.324102
27.7517		0.323429	0.328937	0.328489	0.31914	0.328376	0.324967	0.326668	0.324481	0.325687	0.32862	0.316532	0.327086	0.338773	0.326683	0.325226	0.323791	0.321841	0.323548	0.328931	0.327231	0.329206	0.331729	0.320294	0.320704	0.3268	0.322519	0.32766	0.324747	0.327574	0.327903	0.32859	0.324632	0.323328	0.323252	0.324362	0.32445	0.324324	0.321742	0.321011	0.321809	0.326162	0.322435	0.326014	0.325081	0.323774	0.323278	0.329008	0.321731
28.1539		0.320985	0.326482	0.326132	0.316742	0.32596	0.322541	0.324181	0.322086	0.323317	0.326165	0.314085	0.324766	0.336226	0.324275	0.322819	0.321401	0.319405	0.321194	0.326538	0.324819	0.326754	0.329272	0.31796	0.318287	0.324385	0.320148	0.325217	0.322331	0.325118	0.325521	0.32619	0.322208	0.320944	0.320865	0.321964	0.322058	0.321894	0.319389	0.318571	0.319484	0.323769	0.319994	0.323606	0.322648	0.321318	0.320865	0.326556	0.319408
28.5561		0.318583	0.324064	0.323816	0.31438	0.323576	0.320162	0.321737	0.319727	0.320987	0.323743	0.3117	0.322474	0.333722	0.321904	0.320452	0.319049	0.317004	0.31887	0.324177	0.322441	0.324333	0.326866	0.315666	0.315919	0.32201	0.317816	0.322813	0.319954	0.322704	0.323176	0.323835	0.319828	0.318599	0.318515	0.31961	0.319707	0.319503	0.317064	0.31617	0.317189	0.321416	0.317587	0.321241	0.320255	0.318902	0.318491	0.324138	0.317127
28.9583		0.316219	0.321681	0.321539	0.312052	0.321224	0.317821	0.319333	0.3174	0.318693	0.321357	0.309369	0.320206	0.331253	0.319566	0.318123	0.316732	0.314639	0.316575	0.321847	0.320097	0.321944	0.324505	0.313407	0.313594	0.319675	0.315518	0.320444	0.317613	0.320325	0.320864	0.32152	0.317485	0.31629	0.316202	0.317291	0.317396	0.317149	0.314766	0.313803	0.314923	0.3191	0.315217	0.318911	0.3179	0.316523	0.316153	0.321753	0.314884
29.3605		0.313891	0.319333	0.319301	0.309758	0.318905	0.315512	0.316967	0.315105	0.316432	0.319006	0.307086	0.31796	0.328819	0.317259	0.315829	0.314449	0.312311	0.314307	0.319545	0.317788	0.319587	0.322186	0.311179	0.311308	0.317378	0.313253	0.318106	0.315305	0.31798	0.31858	0.319243	0.315176	0.314015	0.313923	0.315	0.315123	0.314834	0.312499	0.311469	0.312685	0.316814	0.312882	0.316611	0.315581	0.31418	0.313849	0.3194	0.312674
29.7627		0.311594	0.317017	0.3171	0.307495	0.316619	0.313233	0.314636	0.312839	0.314199	0.316691	0.304844	0.315737	0.326416	0.314981	0.31357	0.312196	0.310022	0.312066	0.31727	0.315514	0.317262	0.319904	0.308979	0.30906	0.315116	0.311017	0.315799	0.313026	0.315666	0.316322	0.317	0.312896	0.311772	0.311678	0.312731	0.312885	0.312554	0.310264	0.309165	0.310474	0.314555	0.310583	0.314337	0.313297	0.311871	0.311579	0.317078	0.310494
30.1649		0.309329	0.314732	0.314934	0.305262	0.314363	0.310981	0.312338	0.310602	0.311994	0.314412	0.302635	0.313535	0.324044	0.312732	0.311343	0.309973	0.307767	0.309853	0.315022	0.31327	0.314968	0.317657	0.306805	0.306846	0.312887	0.308809	0.313521	0.310776	0.313382	0.314089	0.314791	0.310644	0.30956	0.309465	0.310484	0.310679	0.31031	0.30806	0.30689	0.308291	0.312319	0.308315	0.31209	0.311047	0.309593	0.30934	0.314784	0.308341
30.5671		0.307092	0.312474	0.312798	0.303058	0.312135	0.308755	0.31007	0.308393	0.309811	0.312167	0.300454	0.311354	0.321704	0.310509	0.309146	0.307777	0.305544	0.307667	0.312799	0.311054	0.312705	0.315442	0.304654	0.304667	0.310686	0.306629	0.311271	0.308553	0.31113	0.311882	0.312612	0.308419	0.307376	0.307281	0.308257	0.308502	0.308099	0.305886	0.304644	0.306133	0.310104	0.306075	0.309867	0.30883	0.307344	0.307132	0.312517	0.306211
30.9693		0.304882	0.310243	0.310692	0.300879	0.309931	0.306555	0.307829	0.306211	0.30765	0.30995	0.298296	0.309193	0.319394	0.308313	0.306976	0.305606	0.303347	0.305506	0.310599	0.308861	0.310469	0.313257	0.302524	0.302519	0.30851	0.304475	0.309048	0.306355	0.308909	0.309698	0.310462	0.306221	0.305219	0.305122	0.306051	0.306348	0.305918	0.303741	0.302423	0.303997	0.307908	0.30386	0.30767	0.306642	0.305122	0.304951	0.310276	0.304101
31.3715		0.302696	0.308034	0.308612	0.298724	0.307745	0.304383	0.305613	0.304053	0.305508	0.307757	0.296158	0.307048	0.317113	0.306139	0.304829	0.303458	0.301172	0.303366	0.308419	0.306685	0.308256	0.311099	0.300413	0.3004	0.306356	0.302344	0.306849	0.304179	0.306717	0.307536	0.308338	0.304047	0.303087	0.302984	0.303867	0.304214	0.303764	0.301618	0.300228	0.301879	0.305731	0.301664	0.305497	0.304481	0.302923	0.302796	0.308056	0.302009
31.7737		0.300531	0.305845	0.306558	0.296589	0.305573	0.302237	0.303418	0.301918	0.303382	0.305582	0.294038	0.304915	0.31486	0.303985	0.3027	0.301328	0.299012	0.301245	0.306256	0.30452	0.306062	0.308965	0.298316	0.298305	0.304221	0.300236	0.304674	0.302023	0.304554	0.305392	0.306238	0.301896	0.300975	0.300864	0.301704	0.302095	0.301633	0.299514	0.298054	0.299774	0.303568	0.299486	0.303347	0.30234	0.300744	0.300662	0.305856	0.299929
32.1759		0.298386	0.303676	0.30453	0.294472	0.303409	0.300117	0.301242	0.299801	0.301271	0.303422	0.291936	0.302788	0.31263	0.301847	0.300585	0.299213	0.296865	0.299138	0.304107	0.302364	0.303882	0.306853	0.296231	0.296232	0.302103	0.298148	0.302518	0.299884	0.302417	0.303263	0.304158	0.299764	0.298881	0.298758	0.299562	0.299987	0.299521	0.297422	0.295899	0.297676	0.301418	0.297322	0.301219	0.300214	0.298581	0.298547	0.303673	0.29786
32.5781		0.296257	0.301524	0.30253	0.292371	0.301248	0.298019	0.29908	0.297699	0.299173	0.30127	0.289849	0.300662	0.310418	0.29972	0.298476	0.29711	0.294728	0.29704	0.301965	0.300212	0.301711	0.304758	0.294153	0.294178	0.300002	0.296079	0.300378	0.297758	0.300301	0.301143	0.302094	0.297648	0.296802	0.296662	0.297438	0.297887	0.297424	0.295337	0.293759	0.295577	0.299277	0.295174	0.299108	0.298097	0.296431	0.296444	0.301503	0.295798
32.9803		0.294142	0.299389	0.300564	0.290285	0.299087	0.29594	0.296931	0.295607	0.297087	0.299125	0.287778	0.298533	0.30822	0.2976	0.29637	0.295015	0.2926	0.294946	0.299828	0.298064	0.299545	0.302679	0.292078	0.292144	0.297916	0.294026	0.298252	0.295642	0.298203	0.299025	0.300045	0.295543	0.294734	0.294576	0.295327	0.29579	0.295339	0.293257	0.29163	0.293474	0.297142	0.293042	0.29701	0.295983	0.294291	0.294352	0.299343	0.293741
33.3825		0.292039	0.297272	0.298637	0.288214	0.296925	0.293875	0.294794	0.293523	0.29501	0.296985	0.285721	0.296395	0.30603	0.295483	0.294262	0.292926	0.290482	0.292855	0.297692	0.295921	0.297381	0.300614	0.290001	0.290136	0.295846	0.291989	0.296135	0.293532	0.296117	0.296905	0.298005	0.293445	0.292676	0.292498	0.293225	0.293697	0.293266	0.291178	0.289509	0.291363	0.29501	0.290928	0.29492	0.293867	0.292159	0.292266	0.297192	0.291688
33.7847		0.289946	0.295172	0.296754	0.286155	0.294761	0.291821	0.292665	0.291444	0.292944	0.294852	0.283676	0.294249	0.303844	0.293366	0.29215	0.290843	0.288378	0.290763	0.295554	0.293782	0.295218	0.298562	0.28792	0.288158	0.293794	0.289967	0.294024	0.291427	0.29404	0.294778	0.295974	0.291349	0.290627	0.290429	0.291127	0.291607	0.291204	0.289102	0.287392	0.289241	0.292878	0.288836	0.292832	0.291747	0.290033	0.290187	0.295047	0.289637
34.1869		0.287863	0.29309	0.29492	0.284111	0.292595	0.289773	0.290546	0.289366	0.290886	0.292724	0.281641	0.292093	0.301659	0.291248	0.290033	0.288765	0.286289	0.288671	0.293413	0.291649	0.293057	0.296523	0.285831	0.286218	0.291758	0.28796	0.291918	0.289325	0.291968	0.292643	0.293948	0.289254	0.288586	0.288371	0.28903	0.289519	0.289152	0.287031	0.285277	0.287108	0.290747	0.286767	0.290743	0.289621	0.287912	0.288112	0.292906	0.287589
34.5891		0.285788	0.291027	0.293134	0.282081	0.290431	0.287729	0.288435	0.287289	0.288838	0.290605	0.279611	0.28993	0.299472	0.289126	0.287913	0.286694	0.284219	0.286578	0.291271	0.289525	0.290897	0.294497	0.283733	0.28432	0.289738	0.285967	0.289815	0.287224	0.289899	0.290497	0.291927	0.287158	0.286555	0.286324	0.286931	0.287435	0.287112	0.284967	0.283162	0.284967	0.288615	0.284721	0.288647	0.287489	0.285797	0.286042	0.290768	0.285543
34.9913		0.28372	0.288982	0.291394	0.280065	0.288268	0.285686	0.286332	0.285213	0.286799	0.288494	0.277584	0.287762	0.297283	0.287003	0.285792	0.284629	0.282168	0.284487	0.289128	0.287409	0.28874	0.292482	0.281628	0.282465	0.287734	0.283988	0.287715	0.285125	0.287832	0.288345	0.28991	0.285061	0.284534	0.28429	0.28483	0.285357	0.285084	0.282914	0.281048	0.28282	0.286484	0.282698	0.286544	0.285355	0.283686	0.283978	0.288634	0.283501
35.3935		0.281658	0.286954	0.289692	0.278063	0.286108	0.283644	0.284236	0.283137	0.284768	0.286392	0.275558	0.285594	0.295092	0.284878	0.283671	0.282572	0.280136	0.282399	0.286988	0.285302	0.286588	0.290477	0.279517	0.280649	0.285742	0.282019	0.285619	0.283029	0.285768	0.286189	0.287895	0.282965	0.282522	0.282269	0.282727	0.283285	0.283067	0.280874	0.278937	0.280674	0.284355	0.280692	0.284434	0.28322	0.28158	0.281921	0.286503	0.281463
35.7957		0.279601	0.284942	0.288015	0.276073	0.283953	0.281604	0.282148	0.281063	0.282746	0.284298	0.27353	0.283429	0.292902	0.282756	0.281555	0.280522	0.278121	0.280317	0.284855	0.283203	0.284444	0.288481	0.277405	0.278861	0.283759	0.280058	0.283527	0.280937	0.283706	0.284034	0.285881	0.280872	0.280519	0.280259	0.280624	0.281221	0.281061	0.278849	0.27683	0.278533	0.282232	0.2787	0.282318	0.28109	0.27948	0.279872	0.284375	0.27943
36.1979		0.277547	0.28294	0.286345	0.274094	0.281804	0.279568	0.280067	0.278993	0.280731	0.282211	0.271503	0.281274	0.290715	0.280639	0.279447	0.278481	0.276119	0.278244	0.282733	0.281114	0.282308	0.286491	0.275297	0.277086	0.281781	0.278102	0.281442	0.278851	0.281649	0.281887	0.283868	0.278785	0.278525	0.278257	0.278526	0.279166	0.279062	0.27684	0.274732	0.276404	0.280118	0.276717	0.280199	0.278967	0.277387	0.277832	0.282253	0.277405
36.6001		0.275498	0.280946	0.284664	0.272123	0.279664	0.277537	0.277992	0.276927	0.278726	0.280132	0.269477	0.279135	0.288535	0.278532	0.277349	0.276448	0.274127	0.276182	0.280628	0.279035	0.280183	0.284504	0.2732	0.275309	0.279805	0.276148	0.279367	0.276774	0.279598	0.279754	0.281856	0.276707	0.276536	0.276263	0.276435	0.277121	0.277068	0.274844	0.272646	0.274294	0.278016	0.274736	0.278084	0.276858	0.275302	0.275801	0.280138	0.275389
37.0023		0.273455	0.278955	0.282952	0.270159	0.277537	0.275514	0.275925	0.274869	0.276729	0.27806	0.267459	0.277017	0.286367	0.276441	0.275266	0.274424	0.27214	0.274135	0.278543	0.276966	0.278072	0.282519	0.271122	0.273511	0.277828	0.274192	0.277303	0.274711	0.277557	0.277641	0.279846	0.274643	0.27455	0.274273	0.274357	0.275086	0.275078	0.272861	0.270577	0.272209	0.27593	0.272753	0.275978	0.274767	0.273229	0.273781	0.278035	0.273388
37.4045		0.271418	0.276962	0.281192	0.2682	0.27543	0.273502	0.273866	0.272824	0.274742	0.275998	0.265454	0.274927	0.284216	0.274372	0.273203	0.27241	0.270154	0.272107	0.276484	0.274913	0.27598	0.280534	0.269071	0.271679	0.275848	0.272234	0.275253	0.272666	0.275528	0.275556	0.277839	0.272594	0.272567	0.272288	0.272296	0.273063	0.273089	0.270888	0.26853	0.270156	0.273865	0.270768	0.27389	0.272699	0.27117	0.271775	0.275948	0.271404
37.8067		0.269392	0.274965	0.27937	0.266244	0.27335	0.271504	0.271819	0.270795	0.272767	0.273947	0.263468	0.272872	0.282088	0.272331	0.271165	0.270409	0.268167	0.270102	0.274454	0.272877	0.273909	0.27855	0.267053	0.269806	0.273866	0.270273	0.273222	0.270642	0.273514	0.273504	0.27584	0.270565	0.270585	0.270307	0.270256	0.271055	0.271103	0.268926	0.266508	0.268141	0.271823	0.268779	0.271824	0.27066	0.269129	0.269784	0.273881	0.269442
38.2089		0.26738	0.272963	0.27748	0.264293	0.271304	0.269521	0.269785	0.268788	0.270805	0.271912	0.261507	0.270858	0.279987	0.270324	0.269158	0.268422	0.266178	0.268122	0.272456	0.270865	0.271864	0.276568	0.265074	0.267889	0.271882	0.26831	0.27121	0.268645	0.271517	0.27149	0.273851	0.268558	0.268604	0.268333	0.268242	0.269062	0.269119	0.266973	0.264517	0.266169	0.26981	0.266791	0.269789	0.268652	0.267111	0.26781	0.27184	0.267504
38.6111		0.265386	0.270955	0.275521	0.262347	0.2693	0.267553	0.267769	0.266807	0.268857	0.269899	0.259575	0.268889	0.277917	0.268355	0.267187	0.266453	0.264189	0.266172	0.270492	0.26888	0.269851	0.274592	0.263138	0.265931	0.2699	0.266349	0.26922	0.266676	0.269539	0.269519	0.271878	0.266575	0.266628	0.26637	0.266254	0.267089	0.26714	0.26503	0.262558	0.264242	0.267827	0.264806	0.267789	0.266679	0.265118	0.265857	0.269828	0.265593
39.0133		0.263413	0.268944	0.273499	0.260408	0.267341	0.265602	0.265773	0.264857	0.266926	0.26791	0.257673	0.266969	0.275879	0.266428	0.265256	0.264504	0.262202	0.264252	0.268561	0.266927	0.267873	0.272625	0.261246	0.263941	0.267923	0.264392	0.267252	0.264739	0.267581	0.26759	0.269925	0.264617	0.264657	0.26442	0.264294	0.265138	0.26517	0.2631	0.260632	0.262363	0.265877	0.262831	0.265825	0.264744	0.263154	0.263927	0.267849	0.263708
39.4155		0.261463	0.266932	0.271425	0.258478	0.265431	0.263667	0.263799	0.262941	0.265012	0.26595	0.255802	0.265097	0.273873	0.264542	0.263367	0.262576	0.260222	0.262362	0.266663	0.265008	0.265932	0.270669	0.259397	0.261929	0.265957	0.262442	0.265307	0.262831	0.265644	0.265706	0.267995	0.262686	0.262693	0.262488	0.262362	0.263213	0.263213	0.261184	0.258739	0.260531	0.263961	0.26087	0.263897	0.262845	0.26122	0.26202	0.265904	0.261847
39.8177		0.259536	0.264923	0.269312	0.25656	0.263567	0.261747	0.261848	0.261059	0.263114	0.26402	0.253959	0.263271	0.271898	0.262696	0.261518	0.260671	0.258252	0.260503	0.264795	0.263122	0.264028	0.268726	0.257584	0.259907	0.264003	0.260502	0.263382	0.260953	0.263728	0.263862	0.26609	0.260782	0.26074	0.260576	0.260457	0.261315	0.261271	0.259285	0.256879	0.258742	0.262078	0.258927	0.262003	0.260982	0.259314	0.260135	0.263991	0.260009
40.2199		0.257631	0.262922	0.267178	0.254655	0.261744	0.259842	0.259921	0.25921	0.261232	0.262121	0.252139	0.261485	0.269948	0.260883	0.259705	0.258787	0.256296	0.258669	0.262954	0.261268	0.262161	0.266797	0.255804	0.257884	0.262066	0.258574	0.261478	0.259099	0.261832	0.262056	0.26421	0.258903	0.258798	0.258684	0.258575	0.259446	0.259346	0.257404	0.255048	0.25699	0.260225	0.257003	0.260139	0.259151	0.257435	0.258272	0.262108	0.258188
40.6221		0.255747	0.260933	0.265037	0.252764	0.259957	0.257951	0.258014	0.257391	0.259365	0.260251	0.250337	0.259732	0.268018	0.259098	0.257925	0.256923	0.254358	0.256857	0.261136	0.259442	0.260325	0.264881	0.254048	0.25587	0.260146	0.256659	0.259593	0.257268	0.259954	0.260279	0.262355	0.257048	0.25687	0.256813	0.256713	0.257604	0.25744	0.255543	0.253242	0.25527	0.258399	0.2551	0.258298	0.257348	0.255579	0.256428	0.260252	0.25638
41.0243		0.25388	0.25896	0.262905	0.250887	0.258196	0.256073	0.256127	0.255598	0.257511	0.258406	0.248547	0.258003	0.266104	0.257334	0.256169	0.255078	0.252439	0.255063	0.259337	0.257639	0.258515	0.262977	0.252311	0.253871	0.258245	0.254757	0.257727	0.255453	0.258093	0.258525	0.260521	0.255213	0.254954	0.25496	0.254867	0.255789	0.255553	0.253702	0.251458	0.253573	0.256595	0.253216	0.256475	0.255569	0.253743	0.254599	0.258416	0.254582
41.4265		0.252029	0.257004	0.260794	0.249026	0.256452	0.254209	0.254257	0.253826	0.255668	0.256581	0.246766	0.256289	0.264198	0.255582	0.25443	0.253249	0.25054	0.253281	0.257552	0.255852	0.256724	0.261084	0.250584	0.251893	0.256361	0.252869	0.255877	0.253651	0.256244	0.256786	0.258706	0.253395	0.253054	0.253123	0.253034	0.253996	0.253683	0.25188	0.249692	0.251889	0.25481	0.251349	0.254664	0.253807	0.251922	0.252783	0.256595	0.25279
41.8287		0.250192	0.25507	0.258715	0.247178	0.254718	0.252357	0.2524	0.252068	0.253837	0.254772	0.24499	0.254581	0.262299	0.253837	0.252701	0.251433	0.24866	0.251506	0.255777	0.254077	0.254945	0.259201	0.248863	0.24994	0.254495	0.250995	0.254044	0.251859	0.254407	0.255052	0.256908	0.25159	0.25117	0.251299	0.251211	0.252222	0.251828	0.250076	0.24794	0.250212	0.253037	0.249497	0.252861	0.252056	0.250113	0.250976	0.254786	0.251003
42.2309		0.248368	0.253157	0.256676	0.245344	0.252987	0.250519	0.250556	0.25032	0.252015	0.252973	0.243218	0.252872	0.260402	0.252093	0.250976	0.24963	0.246798	0.249736	0.25401	0.252307	0.25317	0.257327	0.247143	0.248014	0.252643	0.249134	0.252226	0.250072	0.252578	0.253317	0.255124	0.249794	0.249303	0.249486	0.249396	0.250461	0.249988	0.248288	0.246198	0.248532	0.251273	0.247657	0.251062	0.250311	0.248314	0.249178	0.252982	0.249221
42.6331		0.246556	0.251266	0.254684	0.243524	0.251253	0.248695	0.248722	0.248577	0.250203	0.251179	0.24145	0.251155	0.258507	0.250346	0.24925	0.247836	0.244954	0.247968	0.252246	0.250537	0.251395	0.255464	0.245421	0.246119	0.250805	0.247286	0.250422	0.248289	0.250756	0.251573	0.253351	0.248003	0.247456	0.247681	0.247586	0.248707	0.24816	0.246514	0.244463	0.246844	0.249513	0.245828	0.249265	0.248567	0.246521	0.247386	0.251183	0.247442
43.0353		0.244758	0.249397	0.252743	0.241718	0.249513	0.246883	0.246898	0.246835	0.248402	0.249386	0.239688	0.249427	0.256614	0.248594	0.247521	0.24605	0.243128	0.246199	0.250482	0.248764	0.249613	0.253611	0.243696	0.244257	0.248981	0.245451	0.248628	0.246508	0.248941	0.249816	0.25159	0.246214	0.245628	0.245884	0.245782	0.246958	0.246344	0.24475	0.242732	0.245142	0.247754	0.244008	0.247468	0.246819	0.244735	0.245601	0.249385	0.245668
43.4375		0.242973	0.24755	0.250856	0.239925	0.247763	0.245086	0.245085	0.245092	0.246611	0.247594	0.237933	0.247684	0.254724	0.246836	0.245787	0.244273	0.241317	0.244428	0.248717	0.246987	0.247825	0.251771	0.241966	0.242431	0.247168	0.24363	0.246842	0.244729	0.247133	0.248045	0.249837	0.244427	0.243821	0.244095	0.243983	0.245208	0.244537	0.242994	0.241003	0.243424	0.245994	0.242199	0.24567	0.245066	0.242954	0.243823	0.247588	0.243899
43.8397		0.241203	0.245723	0.249022	0.238147	0.246004	0.243302	0.243282	0.243347	0.244831	0.2458	0.236189	0.245926	0.252839	0.245072	0.244048	0.242503	0.239523	0.242656	0.246948	0.245204	0.246029	0.249946	0.240232	0.240641	0.245369	0.241823	0.245061	0.242951	0.245335	0.246259	0.248094	0.242641	0.242034	0.242315	0.242191	0.243457	0.242741	0.241246	0.239275	0.241689	0.244231	0.240402	0.243872	0.243305	0.241177	0.242051	0.245792	0.242137
44.2419		0.239447	0.243917	0.247241	0.236383	0.244236	0.241532	0.241492	0.2416	0.243065	0.244006	0.234457	0.244155	0.250962	0.243302	0.242305	0.24074	0.237747	0.240884	0.245176	0.243419	0.244227	0.248136	0.238495	0.23889	0.243584	0.240031	0.243282	0.241176	0.243547	0.244461	0.24636	0.240857	0.240267	0.240545	0.240405	0.241704	0.240955	0.239506	0.237547	0.239938	0.242464	0.238618	0.242074	0.241537	0.239406	0.240286	0.243997	0.24038
44.6441		0.237704	0.24213	0.245508	0.234635	0.242462	0.239776	0.239714	0.239852	0.241313	0.242216	0.232737	0.242373	0.249093	0.241529	0.24056	0.238986	0.235987	0.239114	0.243401	0.241633	0.242425	0.246344	0.236756	0.237176	0.241813	0.238255	0.241504	0.239406	0.241774	0.242658	0.244634	0.239078	0.238518	0.238787	0.238629	0.23995	0.23918	0.237773	0.235821	0.238175	0.240695	0.236849	0.240279	0.239765	0.237642	0.23853	0.242205	0.23863
45.0463		0.235974	0.240361	0.243817	0.232902	0.240684	0.238033	0.237951	0.238105	0.239575	0.240431	0.231029	0.240586	0.247236	0.239757	0.238817	0.237241	0.234244	0.237347	0.241626	0.239851	0.240626	0.244569	0.23502	0.235498	0.240058	0.236495	0.239727	0.237643	0.240016	0.240854	0.242917	0.237308	0.236785	0.237042	0.236864	0.238199	0.237417	0.236049	0.234099	0.236407	0.238927	0.235098	0.238489	0.237992	0.235887	0.236784	0.240419	0.236887
45.4485		0.234255	0.238609	0.242158	0.231185	0.238908	0.236304	0.236203	0.236363	0.237852	0.238657	0.229334	0.2388	0.245392	0.237988	0.237077	0.235507	0.232518	0.235588	0.239856	0.238078	0.238837	0.242812	0.233291	0.233851	0.23832	0.234752	0.237954	0.235891	0.238277	0.239059	0.241209	0.235549	0.235066	0.235311	0.235113	0.236453	0.235667	0.234337	0.232384	0.234641	0.237162	0.233367	0.236706	0.236223	0.234143	0.235049	0.238639	0.235152
45.8507		0.232544	0.236873	0.240522	0.229483	0.237139	0.234588	0.234472	0.234632	0.236142	0.236897	0.227651	0.237022	0.243564	0.236229	0.235346	0.233786	0.230808	0.23384	0.238095	0.236319	0.237065	0.241073	0.231572	0.232227	0.236598	0.233027	0.236188	0.234151	0.236557	0.237278	0.239511	0.233808	0.23336	0.233595	0.233376	0.234717	0.233932	0.232639	0.23068	0.232887	0.235406	0.231656	0.234936	0.234462	0.232415	0.233327	0.236869	0.233426
46.2529		0.230842	0.235152	0.238897	0.227797	0.235382	0.232884	0.232756	0.232914	0.234447	0.235153	0.225979	0.235257	0.241755	0.234484	0.233627	0.23208	0.229115	0.232108	0.236347	0.234578	0.235315	0.239351	0.229869	0.230617	0.234891	0.23132	0.234436	0.232428	0.234854	0.235518	0.237824	0.232085	0.231664	0.231894	0.231657	0.232993	0.232213	0.230955	0.228991	0.231152	0.233662	0.229964	0.23318	0.232717	0.230705	0.231619	0.235111	0.231711
46.6551		0.229148	0.233443	0.237273	0.226126	0.233641	0.231191	0.231057	0.231214	0.232763	0.233429	0.224319	0.233513	0.239966	0.232758	0.231924	0.230391	0.227435	0.230395	0.234619	0.232859	0.233591	0.237646	0.228185	0.229013	0.233198	0.229631	0.2327	0.230723	0.233168	0.233785	0.236149	0.230385	0.229978	0.230208	0.229956	0.231286	0.230512	0.229286	0.22732	0.229444	0.231935	0.228292	0.231443	0.230991	0.229016	0.229927	0.233368	0.230008
47.0573		0.227464	0.231745	0.235641	0.224471	0.231921	0.229509	0.229374	0.229536	0.231091	0.231724	0.222672	0.231794	0.238198	0.231054	0.230239	0.228722	0.22577	0.228704	0.232912	0.231164	0.231896	0.235956	0.226522	0.227405	0.231517	0.227959	0.230987	0.229036	0.231497	0.23208	0.234488	0.228707	0.228302	0.228538	0.228273	0.229596	0.228829	0.22763	0.225671	0.227769	0.230229	0.226637	0.229728	0.229288	0.22735	0.22825	0.231642	0.228322
47.4595		0.22579	0.230058	0.233996	0.222832	0.230225	0.227839	0.227706	0.227882	0.22943	0.230039	0.221041	0.230104	0.236454	0.229377	0.228577	0.227072	0.224117	0.227036	0.231229	0.229493	0.230231	0.23428	0.224882	0.225788	0.229847	0.226304	0.229298	0.227369	0.22984	0.230404	0.232842	0.22705	0.226634	0.226883	0.226609	0.227925	0.227165	0.225989	0.224044	0.22613	0.228544	0.224997	0.228037	0.22761	0.225709	0.226589	0.229937	0.226654
47.8617		0.224131	0.22838	0.232337	0.221208	0.228554	0.226179	0.226052	0.226251	0.22778	0.228373	0.219426	0.228442	0.234735	0.227725	0.226939	0.225443	0.222476	0.225392	0.229568	0.227846	0.228594	0.232619	0.223265	0.224159	0.228188	0.224665	0.227634	0.22572	0.228196	0.228758	0.231212	0.225412	0.224975	0.225242	0.224962	0.226273	0.225521	0.224359	0.222441	0.224527	0.226883	0.223369	0.226372	0.225958	0.224091	0.224944	0.228253	0.225008
48.2638		0.222489	0.226711	0.230665	0.2196	0.226908	0.224532	0.224411	0.224641	0.22614	0.226725	0.21783	0.226806	0.23304	0.226099	0.225328	0.223834	0.220847	0.223771	0.227927	0.226222	0.226982	0.230971	0.221668	0.222521	0.226538	0.22304	0.225995	0.224088	0.226564	0.227138	0.229598	0.223791	0.223327	0.223616	0.223331	0.224639	0.223895	0.222742	0.220858	0.222956	0.225244	0.221753	0.224731	0.224331	0.222495	0.223313	0.226591	0.223383
48.666		0.220866	0.225053	0.228987	0.218007	0.225286	0.222899	0.222781	0.223049	0.224513	0.225095	0.21625	0.225194	0.231369	0.224496	0.223741	0.222242	0.21923	0.22217	0.226305	0.224619	0.225391	0.229337	0.22009	0.220878	0.2249	0.221429	0.224379	0.222471	0.224946	0.225541	0.228003	0.222184	0.22169	0.222005	0.221715	0.223023	0.222286	0.221136	0.219295	0.221413	0.223626	0.220147	0.223114	0.222726	0.220917	0.221696	0.22495	0.221782
49.0682		0.219264	0.223406	0.227312	0.216429	0.223686	0.221282	0.22116	0.221472	0.222897	0.223481	0.214687	0.223599	0.229722	0.222913	0.222178	0.220665	0.217623	0.220587	0.224695	0.223032	0.223815	0.227717	0.218526	0.219241	0.223273	0.219831	0.22278	0.220867	0.223339	0.223961	0.226425	0.220586	0.220066	0.220407	0.220114	0.221422	0.220692	0.219541	0.217747	0.21989	0.222025	0.218552	0.221518	0.221138	0.219356	0.220093	0.22333	0.220203
49.4704		0.217683	0.221774	0.225649	0.214865	0.222104	0.219681	0.219544	0.219904	0.221295	0.221883	0.213137	0.222016	0.228096	0.221346	0.220635	0.2191	0.216027	0.219018	0.223096	0.22146	0.222249	0.226109	0.216974	0.217617	0.221659	0.218246	0.221197	0.219274	0.221744	0.222394	0.224865	0.218998	0.218458	0.218822	0.218526	0.219834	0.21911	0.217958	0.216211	0.21838	0.220439	0.216969	0.219941	0.219564	0.217806	0.218503	0.221727	0.218643
49.8726		0.21612	0.220157	0.224009	0.213314	0.220535	0.218098	0.217932	0.21834	0.219705	0.2203	0.211597	0.220438	0.22649	0.219789	0.219105	0.217543	0.214443	0.217459	0.221502	0.219898	0.220688	0.224515	0.215428	0.216014	0.220058	0.216674	0.219624	0.217691	0.22016	0.220834	0.223321	0.217417	0.216868	0.217248	0.21695	0.218256	0.217539	0.216385	0.214683	0.216874	0.218864	0.215398	0.218377	0.217999	0.216265	0.216927	0.220137	0.217099
50.2748		0.214571	0.21856	0.222403	0.211775	0.218973	0.216531	0.216322	0.216776	0.218125	0.218729	0.210064	0.218859	0.224899	0.218238	0.217582	0.215993	0.212871	0.215906	0.219913	0.218344	0.219128	0.222933	0.213884	0.214439	0.21847	0.215115	0.218058	0.216118	0.218587	0.219273	0.221793	0.215842	0.215296	0.215685	0.215385	0.216687	0.215976	0.214822	0.21316	0.215363	0.217298	0.213841	0.216823	0.216437	0.214731	0.215364	0.218558	0.215568
50.677		0.213033	0.216984	0.22084	0.210244	0.217412	0.214978	0.214711	0.215209	0.216554	0.217169	0.208536	0.217273	0.22332	0.216688	0.216058	0.214447	0.211313	0.214356	0.218324	0.216793	0.217564	0.221362	0.212338	0.212895	0.216895	0.213568	0.216495	0.214552	0.217022	0.217707	0.220277	0.214275	0.213744	0.214131	0.213831	0.215123	0.214422	0.213266	0.211638	0.213842	0.215737	0.212298	0.215274	0.214876	0.213199	0.213811	0.216983	0.214044
51.0792		0.2115	0.21543	0.219328	0.20872	0.215844	0.213438	0.2131	0.213635	0.214988	0.215617	0.207011	0.215676	0.221748	0.215134	0.214525	0.212903	0.209771	0.212806	0.216734	0.21524	0.215992	0.219801	0.210786	0.211384	0.215333	0.212035	0.214933	0.212995	0.215466	0.216129	0.218772	0.212713	0.212213	0.212583	0.212284	0.213564	0.212875	0.211715	0.210114	0.212301	0.214177	0.210771	0.213725	0.21331	0.211667	0.212267	0.215409	0.212522
51.4814		0.209967	0.2139	0.217876	0.2072	0.214264	0.211906	0.211489	0.212053	0.213424	0.214066	0.20549	0.214064	0.220178	0.213571	0.212975	0.211361	0.208248	0.211251	0.215138	0.21368	0.214407	0.218248	0.209221	0.209908	0.213781	0.210513	0.213369	0.211443	0.213916	0.214535	0.217274	0.211156	0.210701	0.211042	0.210744	0.212006	0.211337	0.210166	0.208584	0.210737	0.212614	0.209257	0.212172	0.211737	0.210133	0.210728	0.21383	0.210998
51.8836		0.208431	0.212392	0.21649	0.205682	0.212666	0.210379	0.20988	0.210459	0.211861	0.212514	0.203973	0.212432	0.218604	0.211994	0.211404	0.209819	0.206745	0.209688	0.213534	0.212107	0.212806	0.216701	0.207641	0.20847	0.212241	0.209004	0.211801	0.209897	0.212372	0.212918	0.21578	0.209601	0.209207	0.209505	0.209206	0.210449	0.209807	0.208617	0.207045	0.209141	0.211043	0.207757	0.210611	0.210152	0.208594	0.20919	0.212243	0.209468
52.2858		0.206889	0.210907	0.215174	0.204164	0.211047	0.208855	0.208275	0.208852	0.210295	0.210955	0.20246	0.210776	0.217022	0.2104	0.209808	0.208276	0.205265	0.208114	0.211917	0.210517	0.211186	0.21516	0.206041	0.207073	0.210711	0.207508	0.21023	0.208354	0.210833	0.211277	0.214287	0.208046	0.207727	0.207971	0.207668	0.208889	0.208288	0.207066	0.205494	0.20751	0.209461	0.20627	0.209038	0.208555	0.207046	0.207648	0.210644	0.207929
52.688		0.205341	0.209439	0.213932	0.202647	0.209403	0.207332	0.206675	0.207231	0.208726	0.209384	0.200953	0.209095	0.215427	0.208784	0.208188	0.206731	0.20381	0.206526	0.210282	0.208905	0.209545	0.213623	0.204417	0.205724	0.20919	0.206022	0.208653	0.206812	0.209299	0.209606	0.212793	0.206487	0.20626	0.206438	0.206126	0.207327	0.206777	0.205512	0.203931	0.205839	0.207864	0.204792	0.207448	0.206943	0.205488	0.2061	0.20903	0.206376
53.0902		0.203786	0.207986	0.212761	0.20113	0.207736	0.205807	0.205081	0.205595	0.207155	0.207796	0.199454	0.207385	0.213818	0.207144	0.206546	0.20518	0.202377	0.204923	0.208627	0.20727	0.207885	0.21209	0.202769	0.204428	0.207678	0.204546	0.20707	0.205268	0.207768	0.207905	0.211295	0.204921	0.2048	0.204904	0.204578	0.20576	0.205276	0.203956	0.202354	0.204127	0.20625	0.203324	0.20584	0.205317	0.203917	0.204543	0.2074	0.204807
53.4924		0.202225	0.206543	0.211654	0.199616	0.206048	0.204282	0.203493	0.203945	0.205583	0.20619	0.197963	0.205649	0.212192	0.205481	0.204888	0.203625	0.200966	0.203303	0.206949	0.205612	0.206209	0.21056	0.201097	0.203187	0.206175	0.203079	0.205483	0.20372	0.206239	0.206175	0.209791	0.203344	0.203346	0.203369	0.203025	0.204187	0.203782	0.202397	0.200765	0.202378	0.204619	0.201862	0.204212	0.203679	0.202333	0.202976	0.205755	0.203221
53.8946		0.200662	0.205104	0.2106	0.198104	0.204344	0.202755	0.20191	0.202284	0.204011	0.204567	0.196483	0.20389	0.210553	0.203798	0.203222	0.202063	0.199574	0.201667	0.20525	0.203934	0.204524	0.209033	0.199405	0.201998	0.20468	0.201616	0.203893	0.202169	0.204713	0.204419	0.208281	0.201756	0.201895	0.201831	0.201467	0.20261	0.202294	0.200838	0.199167	0.200598	0.202973	0.200406	0.202566	0.20203	0.200738	0.201401	0.204098	0.201615
54.2968		0.199099	0.203665	0.209579	0.196597	0.202632	0.201227	0.200331	0.200618	0.202443	0.202928	0.195016	0.202118	0.208904	0.2021	0.201558	0.200498	0.198197	0.20002	0.203537	0.202247	0.202841	0.207509	0.197701	0.200849	0.203193	0.200157	0.202303	0.200614	0.203188	0.202645	0.206765	0.200158	0.200444	0.20029	0.199908	0.20103	0.200811	0.199278	0.197565	0.198799	0.201319	0.198953	0.200909	0.200378	0.199137	0.199821	0.202434	0.199993
54.699		0.197543	0.202222	0.208566	0.195097	0.200923	0.199701	0.198757	0.198955	0.200881	0.201282	0.193565	0.200346	0.207254	0.200399	0.199905	0.198932	0.19683	0.198366	0.20182	0.200559	0.201171	0.205989	0.195997	0.199721	0.201712	0.198697	0.200719	0.199058	0.201666	0.200864	0.205243	0.198555	0.198992	0.19875	0.198354	0.199452	0.199332	0.19772	0.195969	0.196999	0.199664	0.197503	0.19925	0.198726	0.197536	0.198243	0.200772	0.19836
55.1012		0.196	0.200771	0.20753	0.193603	0.199228	0.198178	0.197188	0.197307	0.199327	0.199638	0.192131	0.198591	0.205612	0.198708	0.198274	0.197372	0.19547	0.196714	0.200113	0.198887	0.199528	0.204474	0.194305	0.198586	0.200238	0.197235	0.199149	0.197507	0.200149	0.199092	0.203717	0.196954	0.197541	0.197213	0.196813	0.19788	0.197857	0.196166	0.194388	0.195219	0.19802	0.196054	0.197604	0.197084	0.195945	0.196674	0.199121	0.196723
55.5034		0.194476	0.199311	0.206442	0.19212	0.197561	0.196662	0.195629	0.195685	0.197786	0.198009	0.190716	0.196873	0.203989	0.197042	0.196673	0.195826	0.194111	0.195076	0.198433	0.197244	0.197927	0.202965	0.192643	0.197413	0.198768	0.195768	0.197603	0.195967	0.198642	0.197346	0.202191	0.195366	0.19609	0.195683	0.195294	0.196323	0.196386	0.194618	0.192833	0.19348	0.1964	0.194608	0.195988	0.195459	0.194375	0.19512	0.197493	0.195093
55.9056		0.19298	0.19784	0.205269	0.190647	0.195932	0.195158	0.194086	0.194102	0.196262	0.196406	0.189323	0.195212	0.202399	0.195416	0.195109	0.194301	0.19275	0.193464	0.196798	0.195644	0.19638	0.201465	0.191025	0.196171	0.197304	0.194297	0.196089	0.194446	0.197149	0.195647	0.20067	0.1938	0.194641	0.194167	0.193806	0.194786	0.19492	0.193077	0.191316	0.191807	0.19482	0.193166	0.19442	0.193862	0.192839	0.19359	0.195899	0.193485
56.3078		0.191516	0.196361	0.203988	0.189189	0.194352	0.19367	0.192564	0.192567	0.194759	0.194843	0.187951	0.193625	0.200852	0.193844	0.193585	0.192806	0.191384	0.191888	0.195223	0.194098	0.194896	0.199974	0.189467	0.194837	0.195842	0.192821	0.194618	0.192952	0.195674	0.194009	0.19916	0.192268	0.193195	0.19267	0.192354	0.193278	0.193461	0.191545	0.189845	0.190215	0.193291	0.19173	0.192915	0.192301	0.191346	0.192088	0.194351	0.191909
56.71		0.190087	0.194874	0.202586	0.187749	0.192829	0.192202	0.191069	0.191087	0.193282	0.193325	0.186602	0.192123	0.199356	0.192337	0.192106	0.191344	0.190011	0.19036	0.193718	0.192611	0.19348	0.198496	0.187977	0.1934	0.194381	0.191345	0.193194	0.191491	0.194223	0.192446	0.197667	0.190778	0.191754	0.191196	0.190945	0.191804	0.192011	0.190026	0.188427	0.188717	0.191825	0.190304	0.191483	0.190787	0.189903	0.190619	0.192856	0.190379
57.1122		0.188694	0.193384	0.201059	0.186327	0.191366	0.19076	0.189606	0.189663	0.191835	0.191859	0.185275	0.190709	0.197918	0.190897	0.19067	0.189918	0.188628	0.188886	0.192287	0.191184	0.192132	0.197029	0.186561	0.191863	0.192921	0.189872	0.191821	0.190068	0.192797	0.190965	0.196198	0.189338	0.19032	0.189748	0.189578	0.190368	0.19057	0.188521	0.187066	0.187318	0.190426	0.188891	0.190127	0.189324	0.188515	0.189184	0.191417	0.1889
57.5144		0.187332	0.191896	0.199419	0.184926	0.189962	0.189345	0.188175	0.188293	0.190423	0.190441	0.183968	0.189377	0.196537	0.189523	0.189278	0.188528	0.187237	0.187468	0.190928	0.189813	0.190845	0.195573	0.185217	0.190244	0.191461	0.188406	0.190497	0.188682	0.191397	0.189565	0.194758	0.187948	0.188894	0.188326	0.18825	0.188968	0.18914	0.187034	0.185759	0.186011	0.189094	0.187492	0.188841	0.187917	0.187179	0.187784	0.190036	0.187476
57.9166		0.185996	0.190414	0.197688	0.183544	0.188611	0.187958	0.186775	0.186967	0.189047	0.189069	0.182681	0.188112	0.195208	0.188206	0.187928	0.187168	0.18584	0.186104	0.189631	0.188487	0.18961	0.194126	0.183936	0.188571	0.19	0.186953	0.189216	0.187331	0.190024	0.18824	0.193352	0.186607	0.187476	0.18693	0.186955	0.187602	0.187721	0.185567	0.184501	0.184785	0.187823	0.186109	0.187615	0.186563	0.185891	0.186417	0.188706	0.186103
58.3188		0.184678	0.188945	0.195895	0.182178	0.187305	0.186597	0.185401	0.185675	0.187707	0.187732	0.181412	0.186896	0.193921	0.186934	0.186615	0.185833	0.184441	0.184788	0.188379	0.187194	0.188413	0.192686	0.182706	0.18688	0.18854	0.185516	0.187967	0.186008	0.188672	0.186977	0.19198	0.185307	0.186067	0.185558	0.185686	0.186266	0.186312	0.184122	0.183283	0.183621	0.186601	0.18474	0.186429	0.185259	0.184641	0.18508	0.18742	0.184773
58.721		0.183368	0.187494	0.194074	0.180824	0.186033	0.18526	0.184047	0.184401	0.186397	0.186422	0.180157	0.185707	0.192664	0.185693	0.185333	0.184516	0.183043	0.183508	0.187157	0.185922	0.187238	0.191247	0.181511	0.185203	0.187084	0.184099	0.186742	0.184705	0.18734	0.185761	0.190641	0.184041	0.184668	0.184204	0.184432	0.184952	0.184912	0.182701	0.182092	0.182498	0.185412	0.183382	0.185264	0.183993	0.183419	0.183768	0.186164	0.183476
59.1232		0.182059	0.186063	0.192255	0.179478	0.184783	0.183942	0.182707	0.183134	0.185112	0.18513	0.178913	0.184524	0.191425	0.184466	0.184076	0.183209	0.181652	0.182252	0.185947	0.184658	0.18607	0.189808	0.180332	0.183567	0.185634	0.182701	0.185528	0.183413	0.186022	0.184575	0.189331	0.182796	0.18328	0.182864	0.183185	0.183653	0.183519	0.181306	0.180917	0.181393	0.184238	0.182032	0.184101	0.182755	0.182211	0.182478	0.184927	0.1822
59.5254		0.180745	0.184654	0.190465	0.178133	0.183542	0.182638	0.181375	0.18186	0.18384	0.183848	0.177676	0.183329	0.190189	0.183239	0.182836	0.181908	0.18027	0.181007	0.184734	0.183392	0.184898	0.188366	0.179153	0.18199	0.184192	0.181322	0.184315	0.182124	0.184712	0.183402	0.188046	0.181561	0.181902	0.181532	0.181939	0.18236	0.18213	0.179937	0.179745	0.180287	0.183063	0.180684	0.182922	0.181532	0.181008	0.181202	0.183693	0.180933
59.9276		0.179423	0.183265	0.188723	0.176788	0.182302	0.181341	0.180048	0.180571	0.18257	0.18257	0.176441	0.182112	0.188946	0.182002	0.181605	0.180609	0.1789	0.179762	0.183506	0.182117	0.183713	0.186922	0.177962	0.180478	0.182763	0.179959	0.183095	0.180831	0.183407	0.182228	0.186777	0.180324	0.180534	0.180203	0.18069	0.181067	0.180743	0.178594	0.178566	0.179165	0.181871	0.179335	0.181716	0.18031	0.179798	0.179934	0.182451	0.179668
60.3298		0.178091	0.181894	0.187039	0.175439	0.181054	0.180046	0.178725	0.179263	0.181292	0.181294	0.175204	0.180865	0.187689	0.180746	0.180374	0.179309	0.177541	0.178505	0.182256	0.180829	0.182508	0.185476	0.176748	0.179029	0.181346	0.178608	0.18186	0.179532	0.182102	0.181039	0.18552	0.179075	0.179175	0.178871	0.179438	0.179771	0.179356	0.177272	0.177372	0.178016	0.180652	0.177983	0.180478	0.179081	0.178575	0.178667	0.181191	0.178398
60.732		0.176752	0.180534	0.185416	0.174089	0.179793	0.17875	0.177407	0.177936	0.179996	0.180016	0.173961	0.179588	0.186413	0.179466	0.179136	0.178007	0.176193	0.177231	0.180984	0.179527	0.181282	0.184033	0.175509	0.177632	0.179944	0.177265	0.180607	0.178226	0.180794	0.179827	0.184266	0.177808	0.177824	0.177533	0.178182	0.178469	0.177966	0.17597	0.176157	0.176834	0.179401	0.176627	0.179208	0.177837	0.177336	0.177395	0.179905	0.177119
61.1342		0.175408	0.17918	0.183852	0.17274	0.178517	0.177449	0.176095	0.176592	0.178676	0.178736	0.172707	0.178286	0.18512	0.178162	0.177888	0.176701	0.174855	0.175937	0.179687	0.178211	0.180035	0.182598	0.174243	0.176273	0.178555	0.175925	0.179334	0.176914	0.17948	0.178588	0.183013	0.176519	0.176479	0.176185	0.176925	0.17716	0.176573	0.174681	0.174921	0.17562	0.178117	0.175269	0.177911	0.176577	0.176077	0.17611	0.178592	0.17583
61.5364		0.174062	0.177827	0.182338	0.171395	0.177226	0.176141	0.174791	0.175239	0.177332	0.177452	0.171442	0.176962	0.183812	0.176836	0.176626	0.175391	0.173526	0.174625	0.17837	0.176885	0.178771	0.181176	0.172957	0.174937	0.177179	0.174586	0.17804	0.175602	0.17816	0.17732	0.181755	0.175207	0.175138	0.174829	0.175671	0.175846	0.17518	0.173402	0.173663	0.174376	0.176803	0.17391	0.176597	0.175301	0.174802	0.174812	0.177251	0.174531
61.9386		0.172719	0.176472	0.180862	0.170059	0.175922	0.174827	0.173495	0.173883	0.175968	0.176163	0.170166	0.175626	0.182496	0.175494	0.175352	0.174076	0.172205	0.173296	0.177036	0.17555	0.177492	0.17977	0.171656	0.173612	0.175814	0.173243	0.176729	0.174292	0.176834	0.176026	0.180491	0.173877	0.1738	0.173468	0.17442	0.174531	0.173788	0.172127	0.172389	0.173108	0.175467	0.172552	0.175276	0.174011	0.173513	0.173499	0.175887	0.173223
62.3408		0.171382	0.175115	0.179413	0.168733	0.174607	0.173507	0.172206	0.172535	0.174589	0.174869	0.168883	0.174282	0.181177	0.174141	0.174067	0.172757	0.170892	0.171957	0.17569	0.174212	0.176204	0.178382	0.170351	0.172288	0.174457	0.171896	0.175405	0.17299	0.175501	0.17471	0.17922	0.172532	0.172463	0.172107	0.173175	0.173215	0.1724	0.170854	0.171102	0.171823	0.174118	0.171197	0.173959	0.172713	0.172215	0.172174	0.174507	0.171907
62.743		0.170053	0.173757	0.177977	0.167419	0.173282	0.172184	0.17092	0.171198	0.173201	0.173569	0.167597	0.172938	0.179862	0.172788	0.172774	0.171434	0.169587	0.170612	0.174335	0.172874	0.174908	0.17701	0.169048	0.170957	0.173105	0.170544	0.174074	0.171695	0.174163	0.17338	0.177942	0.171182	0.171126	0.170753	0.171935	0.171902	0.171019	0.169579	0.16981	0.170528	0.172765	0.169845	0.172654	0.17141	0.170914	0.170841	0.173117	0.170583
63.1452		0.168735	0.1724	0.176541	0.166117	0.17195	0.170859	0.169631	0.169878	0.171811	0.172264	0.166318	0.171598	0.178555	0.171442	0.171476	0.170108	0.16829	0.169267	0.172977	0.171539	0.173609	0.175651	0.167755	0.169617	0.171757	0.169188	0.172741	0.170409	0.172822	0.172041	0.17666	0.169831	0.169789	0.169414	0.170698	0.170591	0.16965	0.168301	0.168519	0.169231	0.171417	0.168497	0.171368	0.170106	0.169614	0.169506	0.171727	0.169254
63.5474		0.167429	0.171051	0.175095	0.164824	0.170609	0.169536	0.168333	0.168574	0.170423	0.170952	0.165051	0.170264	0.177258	0.17011	0.170175	0.168782	0.166998	0.167924	0.171619	0.170208	0.17231	0.1743	0.166475	0.16827	0.170411	0.167827	0.171412	0.16913	0.171478	0.170701	0.175375	0.168488	0.168452	0.168094	0.169462	0.169282	0.168294	0.167018	0.167234	0.167939	0.170081	0.16715	0.170104	0.168806	0.16832	0.168173	0.170342	0.167918
63.9496		0.166134	0.169712	0.17363	0.163538	0.169262	0.168213	0.167021	0.167284	0.169038	0.169636	0.163804	0.16894	0.17597	0.168796	0.168874	0.167459	0.165709	0.166585	0.170265	0.168882	0.171014	0.172952	0.165208	0.166918	0.169066	0.166463	0.170088	0.167855	0.170135	0.169365	0.17409	0.167155	0.167117	0.166795	0.168225	0.167974	0.166954	0.165729	0.165959	0.166656	0.168761	0.165804	0.168861	0.167513	0.167034	0.166847	0.168967	0.166577
64.3518		0.16485	0.168387	0.172143	0.162257	0.167906	0.166892	0.16569	0.166002	0.167657	0.168315	0.16258	0.167626	0.174687	0.167501	0.167573	0.16614	0.164416	0.165252	0.168916	0.167562	0.169723	0.171601	0.163954	0.165566	0.16772	0.165099	0.168772	0.166581	0.168794	0.168034	0.172809	0.165837	0.165784	0.165514	0.166984	0.166662	0.165632	0.164434	0.164696	0.165387	0.167459	0.164456	0.167636	0.166228	0.165759	0.165528	0.167606	0.16523
64.754		0.163576	0.167075	0.170634	0.160978	0.166545	0.16557	0.164342	0.164722	0.16628	0.166989	0.161381	0.16632	0.173406	0.166223	0.166273	0.164825	0.163116	0.163924	0.167576	0.166246	0.168441	0.170246	0.162707	0.164218	0.166376	0.163735	0.167461	0.165305	0.167458	0.166709	0.171535	0.164534	0.164456	0.164244	0.165738	0.165345	0.164327	0.163131	0.163446	0.164133	0.166177	0.163107	0.166422	0.164954	0.164494	0.164218	0.166256	0.163876
65.1562		0.162311	0.165776	0.169109	0.159703	0.16518	0.164248	0.162978	0.163439	0.164908	0.16566	0.160201	0.165021	0.17212	0.164957	0.164971	0.163513	0.161804	0.162601	0.166243	0.164935	0.167167	0.168887	0.161463	0.16288	0.165033	0.162375	0.166152	0.164027	0.166128	0.165388	0.170269	0.163243	0.163133	0.162978	0.164489	0.16402	0.16304	0.161819	0.162207	0.162891	0.164911	0.161757	0.16521	0.16369	0.163236	0.162916	0.164917	0.162517
65.5584		0.161052	0.164486	0.167578	0.158431	0.163813	0.162923	0.161605	0.162149	0.163546	0.164328	0.159035	0.163726	0.170825	0.163696	0.163667	0.162201	0.160477	0.161285	0.164918	0.163627	0.165904	0.167525	0.160214	0.161552	0.163693	0.16102	0.164842	0.162745	0.164807	0.164067	0.169011	0.161963	0.161814	0.161706	0.163237	0.162686	0.161768	0.160496	0.160976	0.161659	0.163657	0.160411	0.163989	0.162437	0.161983	0.161622	0.163583	0.161152
65.9606		0.159798	0.163198	0.166052	0.157162	0.16245	0.161596	0.16023	0.16085	0.162198	0.162994	0.157876	0.162428	0.169515	0.162433	0.162358	0.160885	0.159137	0.159974	0.163599	0.162321	0.164649	0.166162	0.158957	0.160237	0.162355	0.159672	0.163529	0.161461	0.163492	0.162741	0.167759	0.160687	0.160499	0.16042	0.161982	0.161341	0.160508	0.159163	0.159749	0.160431	0.16241	0.159072	0.162748	0.16119	0.16073	0.160336	0.16225	0.159783
66.3628		0.158547	0.161907	0.164544	0.155897	0.161094	0.160267	0.158861	0.159541	0.160867	0.16166	0.156715	0.161124	0.168185	0.161162	0.161043	0.159559	0.157787	0.158668	0.162282	0.161015	0.163401	0.164803	0.157686	0.158931	0.16102	0.158334	0.16221	0.160174	0.162183	0.161407	0.166508	0.159412	0.159186	0.159116	0.160726	0.159984	0.159253	0.157817	0.158521	0.159199	0.161163	0.157747	0.161478	0.159943	0.159473	0.159056	0.160916	0.158414
66.765		0.157296	0.160606	0.163063	0.154633	0.159745	0.158936	0.157506	0.158225	0.159556	0.160327	0.155548	0.159809	0.166834	0.159879	0.159725	0.158223	0.156431	0.157365	0.160965	0.159707	0.162155	0.163451	0.156399	0.15763	0.159686	0.157006	0.160887	0.158885	0.160874	0.160062	0.165256	0.158131	0.15787	0.157793	0.159466	0.158617	0.157998	0.15646	0.157286	0.157956	0.159911	0.156439	0.160172	0.158692	0.15821	0.157784	0.15958	0.157048
67.1672		0.156044	0.159292	0.161619	0.153368	0.158406	0.157606	0.156169	0.156906	0.158263	0.158996	0.154369	0.15848	0.165459	0.15858	0.158406	0.156877	0.155077	0.156061	0.159644	0.158397	0.160906	0.162108	0.155096	0.156331	0.158354	0.155692	0.15956	0.157592	0.159562	0.158703	0.163998	0.156842	0.156549	0.156458	0.158201	0.15724	0.156735	0.155094	0.156043	0.156693	0.158648	0.155153	0.15883	0.157429	0.156939	0.156518	0.158246	0.155688
67.5694		0.15479	0.157961	0.160214	0.152098	0.157073	0.156277	0.154851	0.155586	0.156984	0.157669	0.153178	0.157137	0.164064	0.157267	0.157093	0.155524	0.153731	0.154753	0.158318	0.157082	0.159651	0.160776	0.153779	0.15503	0.157024	0.154391	0.158231	0.156295	0.158244	0.15733	0.162732	0.15554	0.155222	0.155117	0.15693	0.155856	0.155458	0.153721	0.154788	0.155407	0.157371	0.153891	0.157455	0.156152	0.15566	0.155257	0.156917	0.15434
67.9716		0.153533	0.156615	0.158849	0.150819	0.155744	0.154951	0.153551	0.154271	0.15571	0.156346	0.151975	0.155782	0.162651	0.155939	0.155793	0.15417	0.152398	0.153438	0.156984	0.155764	0.158384	0.159455	0.152449	0.153728	0.155699	0.153104	0.156902	0.154992	0.156919	0.155948	0.161461	0.154226	0.153888	0.153781	0.155653	0.154469	0.154163	0.152346	0.153521	0.154094	0.156077	0.152651	0.156055	0.154858	0.154376	0.154001	0.155602	0.153006
68.3738		0.152273	0.155259	0.157522	0.14953	0.154417	0.153627	0.152263	0.152961	0.154432	0.155025	0.15076	0.15442	0.161228	0.154601	0.154512	0.152825	0.151082	0.152114	0.155642	0.154444	0.157102	0.158146	0.15111	0.152429	0.154384	0.151831	0.155574	0.153682	0.15559	0.15456	0.160188	0.152901	0.152549	0.152458	0.154369	0.153086	0.152851	0.150976	0.152244	0.152753	0.154769	0.151429	0.154641	0.15355	0.153091	0.152747	0.154303	0.151689
68.776		0.151009	0.1539	0.15623	0.148231	0.153087	0.152306	0.150982	0.151657	0.153142	0.153704	0.149532	0.153055	0.159805	0.153256	0.153256	0.151497	0.149786	0.15078	0.154293	0.153124	0.155803	0.15685	0.149765	0.15114	0.15308	0.150569	0.154249	0.152365	0.15426	0.15317	0.158917	0.151568	0.151208	0.151153	0.153081	0.151712	0.151522	0.149617	0.150958	0.151386	0.15345	0.150219	0.153227	0.152233	0.151808	0.151496	0.153022	0.15039
69.1782		0.149744	0.152547	0.154968	0.146923	0.151754	0.150985	0.149697	0.150357	0.151835	0.152381	0.148294	0.151692	0.158391	0.151906	0.152024	0.150193	0.148509	0.149439	0.152936	0.151806	0.154488	0.155565	0.148418	0.149871	0.151793	0.149316	0.152927	0.151044	0.152937	0.151785	0.157652	0.150231	0.149871	0.149866	0.151793	0.150351	0.150185	0.148276	0.149662	0.149998	0.152125	0.149013	0.151825	0.150912	0.150531	0.150245	0.151755	0.14911
69.5804		0.148476	0.15121	0.153736	0.145612	0.150416	0.149664	0.148401	0.149057	0.15051	0.151055	0.147044	0.150332	0.156996	0.150553	0.150813	0.148915	0.147249	0.148093	0.151572	0.150492	0.153158	0.154289	0.14707	0.14863	0.15052	0.148067	0.151609	0.149719	0.151629	0.150407	0.156395	0.148891	0.148543	0.148591	0.150508	0.149007	0.148845	0.146959	0.148356	0.148595	0.150799	0.147802	0.150446	0.149593	0.149259	0.148993	0.150494	0.147846
69.9826		0.147206	0.149896	0.152533	0.144301	0.149073	0.148342	0.147086	0.147753	0.149168	0.149725	0.145785	0.148974	0.155627	0.1492	0.149613	0.147664	0.146005	0.146747	0.1502	0.14918	0.151815	0.153018	0.145723	0.147424	0.149261	0.146818	0.150297	0.148394	0.15034	0.149038	0.155147	0.14755	0.14723	0.147322	0.149231	0.14768	0.147514	0.145667	0.14704	0.147183	0.149476	0.146581	0.149095	0.148275	0.147992	0.147737	0.149227	0.146597
70.3848		0.145935	0.14861	0.15136	0.142997	0.147725	0.147019	0.145747	0.146438	0.147815	0.148395	0.144519	0.147616	0.154286	0.147849	0.148414	0.146435	0.144773	0.145404	0.148821	0.147868	0.150463	0.15175	0.144379	0.146253	0.148008	0.145567	0.148992	0.147072	0.149072	0.147677	0.153902	0.146209	0.145936	0.14605	0.147962	0.146365	0.146199	0.144401	0.145712	0.145768	0.148159	0.145343	0.147772	0.146958	0.146723	0.146472	0.147944	0.145357
70.787		0.144663	0.147355	0.150217	0.141703	0.146371	0.145699	0.144384	0.145109	0.146456	0.147068	0.143249	0.146255	0.152972	0.1465	0.147205	0.145219	0.143552	0.144064	0.147435	0.146555	0.149105	0.15048	0.143038	0.145114	0.146756	0.144314	0.147696	0.145757	0.147819	0.146322	0.152656	0.144867	0.144665	0.144766	0.1467	0.145059	0.14491	0.143157	0.144373	0.144356	0.146845	0.14409	0.146477	0.145634	0.145445	0.145194	0.146636	0.144123
71.1892		0.143388	0.146129	0.149103	0.140424	0.145011	0.144385	0.143001	0.143766	0.145099	0.145751	0.141977	0.144887	0.15168	0.145156	0.145978	0.144009	0.142342	0.14273	0.146044	0.145235	0.147746	0.149206	0.141702	0.144001	0.145498	0.143061	0.146407	0.144454	0.146572	0.144971	0.151403	0.143524	0.14342	0.143467	0.145444	0.143755	0.143652	0.141929	0.143025	0.142951	0.145534	0.142823	0.145203	0.144298	0.144152	0.143899	0.145303	0.142888
71.5914		0.142111	0.144927	0.148016	0.13916	0.143647	0.143084	0.141605	0.14241	0.143749	0.144448	0.140705	0.143515	0.150405	0.14382	0.14473	0.142798	0.141144	0.141402	0.144651	0.143908	0.14639	0.14793	0.140372	0.142902	0.144232	0.141816	0.145125	0.143165	0.145322	0.143621	0.150139	0.142183	0.1422	0.142156	0.144192	0.14245	0.142427	0.140712	0.141674	0.141558	0.144223	0.14155	0.143946	0.142944	0.14284	0.142584	0.14395	0.141648
71.9936		0.140829	0.143742	0.146948	0.13791	0.142279	0.141803	0.140209	0.141049	0.142413	0.14316	0.139431	0.14214	0.149139	0.142499	0.143463	0.141583	0.139956	0.140083	0.143264	0.142574	0.145044	0.146651	0.13905	0.141805	0.142959	0.140583	0.143846	0.141894	0.144055	0.142276	0.148863	0.140848	0.141004	0.14084	0.14294	0.141141	0.141236	0.139497	0.140325	0.140178	0.142908	0.14028	0.142702	0.141571	0.141509	0.141248	0.142589	0.140398
72.3958		0.139537	0.142568	0.145892	0.136675	0.140913	0.140547	0.138825	0.139693	0.141094	0.141887	0.138153	0.140769	0.147878	0.141196	0.142184	0.140362	0.138781	0.138774	0.14189	0.141237	0.143713	0.145373	0.137735	0.140701	0.141683	0.139369	0.142568	0.140643	0.142762	0.140938	0.14758	0.139528	0.139828	0.139528	0.141689	0.13983	0.140072	0.13828	0.138986	0.138814	0.141589	0.13902	0.141465	0.140183	0.140164	0.139895	0.141235	0.139132
72.798		0.138231	0.141397	0.144836	0.135451	0.139554	0.139319	0.137464	0.138352	0.139793	0.140621	0.136869	0.13941	0.146618	0.139918	0.1409	0.139138	0.137616	0.13748	0.140537	0.139902	0.1424	0.144099	0.136431	0.13958	0.14041	0.138175	0.141286	0.139412	0.14144	0.139614	0.146296	0.138229	0.138665	0.138231	0.140439	0.138518	0.138928	0.137056	0.137662	0.137466	0.140269	0.13778	0.140232	0.138787	0.138812	0.138531	0.139905	0.137848
73.2002		0.136909	0.140224	0.143768	0.134237	0.138211	0.138115	0.136136	0.137034	0.13851	0.139355	0.135576	0.138069	0.14536	0.138668	0.139623	0.137916	0.136457	0.136203	0.139214	0.138575	0.14111	0.142827	0.135138	0.138434	0.139145	0.137	0.139999	0.138201	0.140089	0.138314	0.14502	0.13696	0.137507	0.136956	0.139195	0.137209	0.137793	0.135822	0.136356	0.136135	0.13895	0.136564	0.139002	0.137395	0.137464	0.137164	0.138608	0.136547
73.6024		0.135568	0.139045	0.142678	0.133031	0.136893	0.136928	0.134843	0.135745	0.137242	0.138079	0.134278	0.136754	0.144106	0.137446	0.138357	0.1367	0.135297	0.134944	0.137925	0.137261	0.139843	0.141553	0.133859	0.137259	0.137892	0.135836	0.138706	0.137004	0.138717	0.137045	0.14376	0.135727	0.136345	0.135708	0.137957	0.135905	0.136655	0.134577	0.135069	0.134822	0.137636	0.135372	0.137773	0.13602	0.136129	0.135804	0.137351	0.135233
74.0046		0.134214	0.137856	0.141556	0.131829	0.135607	0.135747	0.133585	0.134485	0.135985	0.136788	0.132979	0.135468	0.142859	0.136251	0.137108	0.13549	0.13413	0.1337	0.136672	0.135963	0.138596	0.140269	0.132595	0.136051	0.136648	0.134676	0.137409	0.135818	0.137336	0.135814	0.142524	0.134529	0.135168	0.134486	0.136728	0.134609	0.135504	0.133322	0.133799	0.133526	0.136334	0.134203	0.136543	0.134672	0.134813	0.134458	0.136129	0.133911
74.4068		0.132853	0.136655	0.140394	0.13063	0.134358	0.134557	0.132357	0.133253	0.134735	0.13548	0.131688	0.134213	0.14162	0.135077	0.135874	0.134287	0.132947	0.132468	0.135453	0.13468	0.137367	0.138967	0.131351	0.134809	0.135405	0.133509	0.13611	0.134637	0.135958	0.134621	0.141318	0.133365	0.133967	0.133287	0.135507	0.133319	0.13433	0.132055	0.132544	0.132247	0.135045	0.133051	0.13531	0.133354	0.13352	0.133134	0.134934	0.132591
74.809		0.131499	0.135443	0.139188	0.129429	0.133146	0.133348	0.131151	0.132041	0.133491	0.134159	0.130415	0.132989	0.140393	0.133914	0.134654	0.133084	0.131743	0.131238	0.13426	0.13341	0.136149	0.137639	0.130131	0.133533	0.134155	0.132327	0.134813	0.13346	0.134597	0.133464	0.140142	0.132227	0.132738	0.132105	0.134294	0.132035	0.133129	0.130781	0.131303	0.130985	0.133771	0.131908	0.134075	0.132066	0.132248	0.131835	0.133754	0.131282
75.2112		0.130167	0.134221	0.137939	0.128225	0.131967	0.132113	0.12996	0.130842	0.132254	0.132836	0.129168	0.131793	0.139176	0.132753	0.133445	0.131875	0.130512	0.130007	0.133086	0.132146	0.134936	0.136282	0.128937	0.132228	0.132886	0.131128	0.133523	0.132282	0.133264	0.132335	0.138996	0.131107	0.131478	0.130934	0.133083	0.130753	0.131899	0.129499	0.130078	0.12974	0.132515	0.130767	0.132838	0.130803	0.130993	0.130563	0.132578	0.129994
75.6134		0.128869	0.13299	0.136648	0.127014	0.130815	0.130851	0.128776	0.129652	0.13103	0.131524	0.12795	0.13062	0.137969	0.131587	0.13224	0.130653	0.129255	0.128767	0.131919	0.130882	0.133722	0.134901	0.127772	0.1309	0.13159	0.129909	0.132243	0.131105	0.131966	0.131224	0.137876	0.129994	0.13019	0.129769	0.131872	0.129474	0.130642	0.128212	0.128874	0.128512	0.131276	0.12962	0.131597	0.129555	0.129751	0.129318	0.131396	0.128731
76.0156		0.127614	0.131753	0.135319	0.125793	0.129678	0.129567	0.127595	0.128464	0.129827	0.130236	0.126761	0.129464	0.136768	0.130406	0.131037	0.129414	0.127974	0.127516	0.130749	0.129609	0.132505	0.133506	0.126633	0.129559	0.130263	0.128672	0.130978	0.129929	0.130705	0.130118	0.136776	0.128879	0.128879	0.128607	0.130656	0.128198	0.129362	0.126921	0.127693	0.127305	0.130056	0.128461	0.130353	0.128313	0.128517	0.128095	0.130204	0.127496
76.4178		0.126405	0.130513	0.13396	0.124557	0.128546	0.128275	0.126413	0.127276	0.128651	0.128981	0.125594	0.128317	0.135571	0.129206	0.12983	0.128154	0.126674	0.126256	0.12957	0.128325	0.131284	0.132118	0.125516	0.128219	0.128907	0.12742	0.129731	0.128751	0.12948	0.129002	0.135686	0.127754	0.127551	0.127446	0.129433	0.126925	0.128063	0.125629	0.126539	0.126121	0.128855	0.127285	0.129105	0.127067	0.127291	0.126891	0.129001	0.126286
76.82		0.125234	0.129272	0.13258	0.123301	0.127409	0.126987	0.125227	0.126086	0.127508	0.127761	0.124437	0.12717	0.13437	0.127982	0.128618	0.126876	0.125363	0.124988	0.128375	0.127028	0.130057	0.130754	0.124409	0.126895	0.127529	0.126157	0.128506	0.127571	0.128287	0.127865	0.134598	0.126611	0.126214	0.126284	0.128199	0.125656	0.126752	0.124337	0.125411	0.124963	0.127673	0.12609	0.127853	0.125811	0.126073	0.1257	0.127789	0.125096
77.2222		0.124089	0.128034	0.131188	0.122022	0.126259	0.125716	0.124033	0.124893	0.126394	0.126574	0.123279	0.126015	0.133161	0.126732	0.127396	0.125584	0.12405	0.123717	0.127162	0.12572	0.128827	0.129432	0.123301	0.125601	0.126142	0.124887	0.127306	0.126381	0.127118	0.126699	0.1335	0.125445	0.124872	0.125118	0.126953	0.124393	0.125437	0.123046	0.124301	0.123831	0.126509	0.124873	0.126597	0.124543	0.124865	0.124514	0.126569	0.123919
77.6244		0.122955	0.126801	0.129795	0.120717	0.125092	0.124471	0.122829	0.123695	0.125301	0.12541	0.122109	0.124848	0.131937	0.125455	0.126162	0.124285	0.122746	0.122447	0.125933	0.124409	0.127595	0.128162	0.122179	0.12435	0.124758	0.123616	0.126133	0.125177	0.125963	0.1255	0.132385	0.124252	0.123525	0.123948	0.125697	0.123138	0.12413	0.121759	0.123198	0.122723	0.125357	0.123633	0.125339	0.123265	0.123669	0.123326	0.12534	0.122749
78.0266		0.121816	0.125575	0.128411	0.119387	0.123908	0.123256	0.12161	0.122489	0.124215	0.124257	0.12092	0.123667	0.130689	0.12415	0.124915	0.122984	0.121458	0.12118	0.12469	0.123102	0.12636	0.126943	0.121032	0.123148	0.123391	0.12235	0.12499	0.123953	0.124814	0.124267	0.131247	0.123031	0.122173	0.12277	0.124433	0.121892	0.122841	0.120479	0.12209	0.121635	0.12421	0.122373	0.12408	0.121982	0.122484	0.122129	0.124097	0.121583
78.4288		0.120661	0.124356	0.127045	0.118039	0.122708	0.122068	0.120373	0.121276	0.123118	0.123104	0.119707	0.122473	0.129413	0.122822	0.123656	0.121687	0.120197	0.119921	0.123441	0.12181	0.125119	0.125765	0.119854	0.121997	0.122054	0.121098	0.123876	0.122706	0.123663	0.123008	0.130085	0.121786	0.120814	0.121584	0.123166	0.120659	0.121584	0.119211	0.120963	0.120559	0.123058	0.121096	0.122827	0.1207	0.121306	0.120918	0.122832	0.120421
78.831		0.119487	0.123143	0.125701	0.116682	0.1215	0.120903	0.119117	0.120057	0.121994	0.121941	0.11847	0.121271	0.128105	0.121479	0.12239	0.120397	0.118965	0.118676	0.122192	0.120542	0.123872	0.124612	0.118648	0.120887	0.120755	0.119869	0.122787	0.121439	0.122503	0.121731	0.128908	0.120523	0.119447	0.120385	0.121902	0.119444	0.120371	0.117959	0.119807	0.119486	0.121893	0.119806	0.121584	0.119428	0.120127	0.11969	0.12154	0.119267
79.2332		0.118293	0.121933	0.124383	0.115331	0.120289	0.119752	0.117846	0.118837	0.120834	0.120766	0.117211	0.120067	0.126767	0.120133	0.121124	0.119115	0.117766	0.11745	0.120949	0.119304	0.122616	0.123464	0.117423	0.119803	0.119498	0.118669	0.121717	0.120159	0.121332	0.120449	0.127728	0.119254	0.118075	0.119172	0.120651	0.118253	0.119208	0.116728	0.118619	0.11841	0.120708	0.118511	0.120356	0.118172	0.118941	0.11845	0.120215	0.118123
79.6354		0.117083	0.120725	0.12309	0.114	0.119083	0.118606	0.116565	0.117623	0.119631	0.119579	0.115938	0.118863	0.125404	0.118802	0.119862	0.11784	0.116597	0.116251	0.119718	0.118101	0.12135	0.122302	0.116193	0.118722	0.11828	0.117499	0.120655	0.118878	0.120147	0.119175	0.126562	0.117992	0.116707	0.117944	0.119423	0.117089	0.118093	0.115524	0.117402	0.117327	0.119504	0.117221	0.119146	0.116936	0.117742	0.117202	0.118862	0.116994
80.0376		0.115862	0.119514	0.121819	0.112701	0.117888	0.117458	0.115286	0.116421	0.118391	0.118383	0.114654	0.117664	0.124026	0.117503	0.118612	0.11657	0.115451	0.115083	0.118501	0.116932	0.120076	0.121116	0.114974	0.117621	0.117095	0.116351	0.119591	0.117611	0.118949	0.11792	0.125427	0.11675	0.115355	0.116701	0.118225	0.115954	0.117019	0.114348	0.116166	0.116239	0.118287	0.115944	0.117952	0.115721	0.116529	0.115956	0.117489	0.115879
80.4398		0.114633	0.118297	0.120566	0.111439	0.116709	0.1163	0.114021	0.115239	0.117123	0.117182	0.113367	0.116467	0.122647	0.116252	0.117376	0.115301	0.114321	0.113949	0.117297	0.115791	0.118798	0.119898	0.113778	0.116479	0.115931	0.115214	0.118513	0.116371	0.117739	0.116692	0.124337	0.115534	0.114035	0.115446	0.11706	0.114843	0.115969	0.113198	0.11492	0.115151	0.117067	0.114689	0.116768	0.114526	0.115304	0.114722	0.116114	0.114774
80.842		0.113399	0.117075	0.11933	0.110216	0.115549	0.115126	0.112784	0.114079	0.115839	0.115978	0.112081	0.115272	0.121282	0.115058	0.116154	0.11403	0.113196	0.112843	0.116102	0.114674	0.117522	0.11865	0.112609	0.115284	0.114774	0.114071	0.117413	0.115169	0.116522	0.115494	0.1233	0.114344	0.112761	0.114185	0.115926	0.113749	0.114922	0.112069	0.113678	0.114067	0.115859	0.113461	0.115586	0.113348	0.114075	0.113508	0.114757	0.11367
81.2442		0.112163	0.115849	0.118109	0.109024	0.114407	0.113937	0.111587	0.112935	0.114553	0.114771	0.110799	0.114077	0.119943	0.113924	0.114941	0.112756	0.112069	0.111756	0.11491	0.113572	0.116256	0.117373	0.111463	0.114034	0.113609	0.112907	0.116284	0.114012	0.115302	0.114327	0.122309	0.113173	0.111543	0.112929	0.114816	0.112661	0.113859	0.110952	0.112446	0.112992	0.114676	0.11226	0.114397	0.112184	0.11285	0.112321	0.11344	0.112559
81.6464		0.11093	0.114624	0.116905	0.107858	0.113284	0.112735	0.110439	0.1118	0.113276	0.113558	0.109522	0.112885	0.118643	0.112841	0.113734	0.111479	0.110933	0.110675	0.113713	0.112478	0.115008	0.116071	0.11033	0.112739	0.112427	0.111715	0.115123	0.112902	0.114084	0.113188	0.121353	0.112006	0.110388	0.111689	0.113718	0.111567	0.112762	0.109837	0.111227	0.111927	0.113525	0.111083	0.113192	0.111034	0.111641	0.11116	0.112176	0.111433
82.0485		0.109709	0.113405	0.115723	0.10671	0.112178	0.111529	0.109344	0.110659	0.112015	0.112335	0.108251	0.111698	0.11739	0.111798	0.11253	0.110205	0.109785	0.109587	0.112502	0.111385	0.113783	0.114747	0.109195	0.111418	0.111224	0.110496	0.113933	0.111837	0.112875	0.112073	0.12041	0.110826	0.109293	0.110479	0.112618	0.110458	0.111624	0.108716	0.110017	0.110868	0.11241	0.109921	0.111969	0.109898	0.110453	0.110024	0.110975	0.110288
82.4507		0.10851	0.112199	0.114566	0.10558	0.111088	0.110331	0.108301	0.109497	0.110774	0.111101	0.106988	0.110522	0.116185	0.110776	0.111328	0.108943	0.108621	0.108479	0.111272	0.110289	0.112585	0.113404	0.108046	0.110092	0.110003	0.109262	0.112717	0.110807	0.111682	0.110976	0.119454	0.109617	0.108247	0.109306	0.111507	0.109331	0.110443	0.107583	0.108808	0.109811	0.111327	0.108765	0.110729	0.108781	0.109289	0.108905	0.109834	0.109127
82.8529		0.107343	0.111006	0.113435	0.104471	0.110014	0.109157	0.107301	0.1083	0.109552	0.10986	0.105737	0.109358	0.115027	0.109759	0.110132	0.107706	0.107439	0.107347	0.110015	0.109182	0.11141	0.112048	0.106874	0.108781	0.108774	0.108028	0.111483	0.109802	0.11051	0.109894	0.118465	0.108368	0.107236	0.108173	0.110377	0.108189	0.109226	0.106435	0.107589	0.10875	0.110267	0.107602	0.109482	0.107687	0.108145	0.107796	0.108743	0.107954
83.2551		0.106211	0.109824	0.112327	0.103389	0.108959	0.10802	0.106328	0.107059	0.108342	0.108621	0.104507	0.108206	0.113911	0.108731	0.108945	0.106506	0.106237	0.106188	0.10873	0.108059	0.110254	0.110689	0.105679	0.107496	0.107553	0.106811	0.110237	0.108806	0.109362	0.108821	0.117424	0.107078	0.106243	0.107074	0.109226	0.107036	0.107983	0.105276	0.10635	0.107681	0.109215	0.106424	0.108237	0.10662	0.107013	0.106687	0.107688	0.106781
83.6573		0.105112	0.108645	0.111233	0.10234	0.107921	0.106927	0.105361	0.10577	0.107134	0.107396	0.103309	0.107063	0.11283	0.107681	0.107768	0.105357	0.105013	0.105006	0.107415	0.106914	0.109104	0.109344	0.104465	0.106239	0.106354	0.10562	0.108988	0.1078	0.108235	0.107752	0.116325	0.10575	0.105249	0.105998	0.108056	0.105879	0.106727	0.104111	0.105085	0.1066	0.108158	0.105226	0.107007	0.105579	0.105886	0.105571	0.10665	0.105616
84.0595		0.104031	0.107455	0.11014	0.101321	0.1069	0.105875	0.104377	0.104439	0.105918	0.106197	0.102154	0.105918	0.111774	0.1066	0.106596	0.104265	0.103767	0.103803	0.106075	0.105742	0.107945	0.108031	0.103239	0.105004	0.105191	0.104454	0.107745	0.106765	0.107119	0.106676	0.115169	0.104394	0.104241	0.104933	0.106869	0.104721	0.105472	0.102948	0.103793	0.105503	0.107079	0.104008	0.105798	0.10456	0.104755	0.104442	0.105613	0.104466
84.4617		0.102952	0.106244	0.109033	0.100321	0.105888	0.104852	0.103351	0.103074	0.104684	0.105034	0.101047	0.104762	0.110733	0.105482	0.105418	0.103228	0.102506	0.102582	0.104719	0.104538	0.10676	0.106774	0.102004	0.103783	0.104069	0.1033	0.106519	0.105683	0.105999	0.105582	0.113963	0.103022	0.103208	0.103867	0.105667	0.103561	0.104228	0.101794	0.102481	0.104384	0.105968	0.102777	0.104613	0.103552	0.103617	0.103294	0.104567	0.103331
84.8639		0.101856	0.105001	0.107902	0.0993209	0.104876	0.103836	0.102265	0.101692	0.103428	0.103909	0.0999901	0.103585	0.109695	0.104321	0.104218	0.102236	0.101242	0.101346	0.10336	0.103302	0.105534	0.105587	0.100761	0.102573	0.10299	0.102138	0.105322	0.104544	0.10486	0.104453	0.112718	0.101646	0.102142	0.102791	0.10445	0.102395	0.103008	0.100657	0.101162	0.10323	0.104818	0.101546	0.103447	0.102537	0.102473	0.102124	0.103505	0.10221
85.2661		0.10073	0.103725	0.10674	0.0982942	0.103849	0.102803	0.101109	0.100307	0.102153	0.102815	0.0989725	0.102382	0.108651	0.103116	0.102981	0.101272	0.099991	0.100096	0.102014	0.102037	0.10426	0.104477	0.0995043	0.101379	0.101949	0.100949	0.104165	0.103342	0.103685	0.10327	0.111446	0.10028	0.101046	0.101703	0.103217	0.101217	0.101822	0.0995395	0.0998512	0.102027	0.103627	0.100328	0.102289	0.1015	0.101328	0.100929	0.102427	0.101095
85.6683		0.0995768	0.102425	0.105553	0.0972162	0.10279	0.101728	0.0998854	0.098932	0.100869	0.101738	0.0979781	0.101155	0.107589	0.101867	0.101696	0.100314	0.0987743	0.0988325	0.100698	0.100753	0.102938	0.103435	0.0982264	0.100218	0.100935	0.0997222	0.103054	0.102082	0.102467	0.102016	0.110157	0.0989333	0.0999217	0.100603	0.101967	0.100027	0.10068	0.0984453	0.0985645	0.10076	0.102399	0.0991395	0.101127	0.100421	0.10019	0.0997082	0.101336	0.0999807
86.0705		0.098409	0.101121	0.104352	0.0960697	0.101683	0.100597	0.0986084	0.0975778	0.0995951	0.100661	0.0969888	0.0999054	0.1065	0.100585	0.100363	0.0993406	0.0976093	0.097562	0.0994244	0.0994635	0.101583	0.102439	0.096922	0.0991119	0.0999368	0.0984603	0.101986	0.100777	0.101209	0.100678	0.108854	0.0976177	0.0987795	0.0994923	0.100703	0.0988291	0.0995883	0.0973734	0.097314	0.0994184	0.101144	0.0979897	0.099951	0.0992899	0.0990638	0.0984653	0.100234	0.0988633
86.4727		0.0972521	0.0998348	0.103153	0.0948496	0.100514	0.099403	0.0973004	0.0962494	0.0983496	0.0995649	0.0959916	0.0986413	0.105376	0.0992811	0.0989952	0.0983351	0.096506	0.0962927	0.0982016	0.0981868	0.100219	0.101454	0.095592	0.0980823	0.0989373	0.0971803	0.100946	0.0994449	0.099922	0.0992524	0.107541	0.0963425	0.097629	0.0983687	0.0994316	0.0976354	0.0985453	0.0963201	0.0961047	0.0979996	0.0998755	0.096882	0.0987527	0.0981015	0.0979507	0.0972063	0.0991204	0.0977446
86.8749		0.0961343	0.0985916	0.101972	0.0935656	0.099273	0.098153	0.0959871	0.0949488	0.0971498	0.0984382	0.0949852	0.0973691	0.104209	0.0979742	0.0976132	0.0972883	0.0954623	0.0950355	0.0970291	0.0969412	0.0988722	0.100445	0.0942446	0.0971385	0.0979191	0.0959096	0.099908	0.0981054	0.0986272	0.0977436	0.106215	0.0951156	0.0964801	0.0972291	0.0981643	0.0964642	0.0975427	0.0952769	0.094934	0.0965142	0.0986032	0.0958109	0.0975314	0.0968604	0.0968442	0.0959411	0.0979916	0.0966313
87.2771		0.0950791	0.0974078	0.100819	0.0922394	0.0979549	0.0968619	0.0946905	0.0936768	0.0960052	0.0972739	0.0939817	0.0960945	0.102995	0.096681	0.0962458	0.0961994	0.0944629	0.0938017	0.0958995	0.0957416	0.0975687	0.0993781	0.0928942	0.0962696	0.096863	0.0946786	0.0988396	0.0967721	0.0973474	0.096169	0.104876	0.0939419	0.095339	0.0960688	0.0969141	0.0953354	0.0965636	0.0942308	0.0937921	0.0949828	0.0973341	0.0947634	0.096291	0.0955794	0.0957305	0.0946819	0.0968376	0.0955324
87.6793		0.0940973	0.0962876	0.0996916	0.0909	0.0965584	0.0955496	0.0934233	0.092435	0.0949151	0.0960712	0.0930029	0.0948223	0.101731	0.0954136	0.094922	0.0950746	0.0934809	0.092601	0.0948012	0.0945961	0.0963218	0.0982328	0.091558	0.0954414	0.0957509	0.0935112	0.0977087	0.0954506	0.0961017	0.0945553	0.103523	0.0928209	0.0942074	0.094885	0.0956934	0.094265	0.0955841	0.0931648	0.0926659	0.093432	0.0960677	0.0937217	0.095039	0.0942777	0.094591	0.0934403	0.095647	0.0944555
88.0815		0.0931831	0.09522	0.0985814	0.0895766	0.0950867	0.0942368	0.0921852	0.0912274	0.0938701	0.0948334	0.0920702	0.0935575	0.100421	0.0941768	0.093666	0.0939245	0.0924842	0.0914403	0.0937215	0.0935027	0.0951285	0.0970036	0.090251	0.0946009	0.0945696	0.0924182	0.0964947	0.0941364	0.094901	0.0929363	0.102157	0.0917458	0.0930822	0.0936794	0.0945107	0.0932612	0.0945779	0.0920613	0.0915434	0.091887	0.0947971	0.0926681	0.0937836	0.0929779	0.0934071	0.0922242	0.094411	0.0934021
88.4837		0.0923144	0.09418	0.0974729	0.0882927	0.0935474	0.0929411	0.0909646	0.0900608	0.0928561	0.0935654	0.0911917	0.0923067	0.099074	0.0929671	0.0924952	0.09276	0.0914425	0.0903242	0.0926504	0.0924485	0.093968	0.0957016	0.0889824	0.093689	0.0933152	0.0913939	0.0951958	0.0928177	0.0937457	0.0913489	0.10079	0.090703	0.091957	0.0924594	0.093369	0.0923221	0.0935207	0.0909062	0.0904181	0.0903668	0.0935112	0.0915898	0.0925315	0.0917022	0.0921661	0.0910346	0.0931288	0.0923643
88.8859		0.091458	0.0931331	0.096352	0.0870625	0.0919547	0.091675	0.089742	0.0889427	0.0918594	0.0922721	0.090351	0.0910789	0.0977038	0.0917763	0.0914188	0.0915903	0.0903352	0.0892556	0.0915824	0.0914106	0.0928058	0.0943517	0.0877546	0.0926577	0.0919971	0.090418	0.093833	0.0914801	0.092627	0.0898279	0.0994355	0.089674	0.0908256	0.0912366	0.092266	0.091436	0.0923944	0.089695	0.0892911	0.0888815	0.0921996	0.0904827	0.0912866	0.0904705	0.0908663	0.0898652	0.0918123	0.0913242
89.2881		0.0905767	0.0920421	0.0952119	0.0858894	0.0903305	0.0904449	0.0884975	0.0878786	0.0908722	0.0909582	0.0895025	0.0898849	0.0963326	0.0905964	0.0904384	0.090421	0.0891561	0.0882362	0.0905164	0.0903607	0.0916042	0.0929864	0.0865652	0.0914858	0.0906396	0.0894619	0.0924463	0.0901138	0.0915312	0.0884016	0.0981159	0.0886388	0.0896844	0.0900235	0.0911956	0.0905838	0.0911891	0.0884365	0.0881711	0.0874338	0.0908573	0.0893526	0.0900496	0.089298	0.0895201	0.0887029	0.0904869	0.090257
89.6903		0.0896373	0.0908761	0.0940558	0.0847674	0.0887048	0.0892517	0.0872175	0.086869	0.0898947	0.0896292	0.088576	0.0887349	0.0949875	0.0894244	0.089548	0.0892552	0.0879149	0.087265	0.0894532	0.0892709	0.0903335	0.091639	0.0854105	0.0901889	0.089279	0.0884977	0.0910856	0.0887199	0.0904446	0.0870874	0.096854	0.0875798	0.0885342	0.0888297	0.0901495	0.0897422	0.0899034	0.0871542	0.0870703	0.0860243	0.0894883	0.0882137	0.08882	0.0881957	0.088154	0.0875314	0.0891885	0.0891367
90.0925		0.0886177	0.0896169	0.0928954	0.0836848	0.0871144	0.0880906	0.0858997	0.0859075	0.0889334	0.0882934	0.0874923	0.0876359	0.0936976	0.088265	0.0887334	0.0880944	0.0866345	0.0863357	0.0883938	0.0881206	0.0889826	0.0903362	0.08429	0.0888168	0.0879576	0.087507	0.0897969	0.087315	0.0893568	0.0858896	0.0956672	0.0864858	0.0873803	0.0876594	0.0891194	0.0888859	0.0885434	0.0858827	0.0859982	0.084657	0.0881071	0.0870839	0.0875973	0.0871698	0.0868037	0.0863357	0.0879557	0.0879437
90.4947		0.0875117	0.0882639	0.0917454	0.0826276	0.0855978	0.0869521	0.0845551	0.0849808	0.0879965	0.0869625	0.0861844	0.0865878	0.0924894	0.0871286	0.08797	0.086941	0.0853451	0.0854333	0.0873364	0.086902	0.0875641	0.0890927	0.0832087	0.0874412	0.0867149	0.0864861	0.088611	0.0859312	0.0882629	0.0847993	0.0945609	0.0853543	0.0862294	0.0865103	0.088097	0.0879903	0.0871206	0.0846594	0.0849567	0.0833437	0.0867371	0.08598	0.0863835	0.0862218	0.0855074	0.0851067	0.0868204	0.0866718
90.8969		0.08633	0.0868355	0.0906158	0.0815838	0.0841902	0.0858225	0.083206	0.0840714	0.0870872	0.085652	0.0846198	0.0855808	0.0913809	0.0860267	0.087222	0.0858002	0.0840774	0.084532	0.0862774	0.0856229	0.0861123	0.0879073	0.0821774	0.0861352	0.085578	0.0854473	0.0875354	0.0846114	0.0871621	0.0837967	0.0935219	0.0841923	0.0850867	0.0853757	0.0870735	0.0870326	0.0856516	0.0835146	0.0839366	0.0821033	0.0854072	0.0849134	0.0851847	0.0853458	0.0842966	0.0838439	0.0857977	0.0853305
91.2991		0.0850987	0.0853651	0.0895058	0.0805465	0.0829162	0.0846857	0.0818816	0.0831613	0.0861976	0.0843792	0.082815	0.0845946	0.0903769	0.084964	0.0864438	0.0846804	0.0828548	0.0835971	0.0852128	0.0843067	0.0846727	0.0867622	0.0812088	0.0849525	0.0845557	0.0844133	0.0865548	0.0834004	0.086055	0.0828559	0.0925181	0.0830137	0.0839527	0.0842473	0.0860388	0.085994	0.0841582	0.0824616	0.0829194	0.0809571	0.0841476	0.0838877	0.0840115	0.0845267	0.0831881	0.082556	0.0848799	0.0839434
91.7013		0.0838534	0.0838955	0.0884024	0.0795141	0.0817857	0.0835254	0.080611	0.0822365	0.0853055	0.0831605	0.080838	0.0836006	0.0894663	0.0839326	0.0855851	0.0835927	0.08169	0.0825906	0.0841412	0.0829877	0.0832892	0.0856257	0.080312	0.0839107	0.0836355	0.0834091	0.0856378	0.0823334	0.0849402	0.081951	0.0915035	0.081836	0.0828228	0.0831177	0.0849809	0.084862	0.0826678	0.0814911	0.0818836	0.0799206	0.0829856	0.0829	0.082878	0.083736	0.0821792	0.0812582	0.0840369	0.0825417
92.1035		0.0826313	0.0824698	0.0872827	0.0784902	0.0807932	0.0823286	0.0794176	0.0812895	0.084376	0.0820086	0.0787963	0.0825665	0.0886232	0.0829101	0.0845995	0.0825486	0.0805829	0.0814795	0.0830652	0.0817048	0.0819904	0.0844575	0.0794855	0.0829851	0.0827852	0.0824515	0.0847485	0.0814255	0.0838124	0.0810622	0.0904282	0.0806749	0.0816897	0.0819823	0.0838875	0.0836336	0.081213	0.0805713	0.0808134	0.0789956	0.0819414	0.0819432	0.0817989	0.0829321	0.0812472	0.0799692	0.0832219	0.0811547
92.5057		0.0814615	0.0811242	0.0861215	0.07748	0.0799199	0.0810882	0.0783146	0.0803192	0.0833673	0.0809298	0.0768154	0.0814633	0.0878111	0.0818628	0.0834554	0.0815566	0.0795225	0.0802447	0.0819918	0.0804938	0.080782	0.0832165	0.0787124	0.0821147	0.0819582	0.081542	0.0838572	0.0806635	0.0826629	0.0801789	0.089251	0.0795394	0.0805472	0.0808382	0.0827476	0.0823181	0.0798268	0.0796555	0.079707	0.0781646	0.0810249	0.0810096	0.0807852	0.0820625	0.0803532	0.0787065	0.0823827	0.0798031
92.9079		0.0803562	0.0798818	0.0848999	0.0764867	0.0791383	0.0798052	0.0773032	0.0793281	0.0822394	0.0799227	0.0750119	0.0802732	0.0869897	0.0807544	0.0821443	0.0806178	0.0784915	0.0788869	0.0809294	0.0793796	0.0796469	0.0818695	0.0779583	0.0812189	0.0810999	0.0806638	0.0829476	0.0800046	0.0814812	0.0792988	0.0879505	0.0784292	0.0793948	0.0796834	0.0815552	0.0809381	0.0785373	0.0786927	0.0785797	0.0773922	0.0802314	0.0800931	0.0798384	0.0810729	0.0794493	0.0774845	0.0814749	0.0784949
93.3101		0.0793053	0.0787503	0.083612	0.0755076	0.0784179	0.0784888	0.0763741	0.0783184	0.0809647	0.078978	0.0734706	0.0789951	0.086123	0.0795565	0.0806852	0.0797224	0.0774711	0.0774269	0.0798822	0.0783712	0.0785525	0.0803981	0.0771751	0.0802201	0.0801552	0.0797846	0.0820177	0.0793809	0.0802595	0.078423	0.0865292	0.0773336	0.0782404	0.0785156	0.080311	0.0795274	0.077359	0.077641	0.0774603	0.0766312	0.079538	0.0791888	0.0789458	0.0799189	0.0784874	0.0763125	0.080473	0.0772275
93.7123		0.0782764	0.077724	0.0822686	0.0745336	0.0777271	0.0771544	0.07551	0.0772881	0.079537	0.0780788	0.0722295	0.0776474	0.0851852	0.0782567	0.0791223	0.0788482	0.0764461	0.0759012	0.0788467	0.0774584	0.0774641	0.0788038	0.0763097	0.0790673	0.0790754	0.0788643	0.0810759	0.0787106	0.0789964	0.0775477	0.0850116	0.0762339	0.0770998	0.077332	0.0790236	0.0781267	0.0762879	0.0764774	0.0763813	0.0758335	0.078902	0.078291	0.0780785	0.0785783	0.0774274	0.0751949	0.0793758	0.0759941
94.1145		0.0772216	0.0767869	0.0808966	0.0735503	0.0770342	0.0758206	0.0746886	0.0762292	0.0779762	0.0772035	0.0712778	0.0762648	0.0841637	0.0768639	0.0775168	0.0779621	0.0754084	0.074353	0.0778084	0.0766122	0.0763565	0.0771083	0.0753165	0.0777518	0.077825	0.0778656	0.0801341	0.0779131	0.0777011	0.0766575	0.0834366	0.0751081	0.0759942	0.0761312	0.0777072	0.076776	0.0753014	0.0752032	0.0753665	0.0749621	0.0782624	0.0773904	0.0771936	0.0770598	0.0762437	0.0741313	0.078207	0.0747902
94.5167		0.0760901	0.0759176	0.0795344	0.0725437	0.0763055	0.0745063	0.0738862	0.0751304	0.0763289	0.0763282	0.070564	0.0748912	0.0830591	0.0754059	0.0759357	0.0770255	0.074359	0.0728245	0.0767441	0.0757889	0.0752234	0.0753507	0.0741715	0.0763114	0.076389	0.0767629	0.0792019	0.0769249	0.076396	0.0757224	0.0818472	0.0739367	0.0749447	0.0749154	0.0763793	0.0755072	0.0743647	0.0738442	0.0744199	0.0739994	0.0775472	0.0764716	0.0762434	0.0754041	0.0749294	0.0731166	0.0770079	0.0736198
94.9189		0.074843	0.0750938	0.0782251	0.0715063	0.0755046	0.0732287	0.0730786	0.0739825	0.0746617	0.0754316	0.0700128	0.0735686	0.0818814	0.0739228	0.0744394	0.0760039	0.0733081	0.0713493	0.0756273	0.0749376	0.0740782	0.0735828	0.0728821	0.0748207	0.0747793	0.0755491	0.0782833	0.0757139	0.0751162	0.0747025	0.0802835	0.0727088	0.0739673	0.0736923	0.0750564	0.0743381	0.0734436	0.0724453	0.0735217	0.0729508	0.0766864	0.075515	0.0751882	0.0736756	0.0734976	0.0721402	0.0758256	0.0724955
95.3211		0.0734668	0.074294	0.077008	0.0704417	0.074594	0.0720022	0.0722414	0.072785	0.0730504	0.0744991	0.0695452	0.0723268	0.0806445	0.0724575	0.0730722	0.0748771	0.0722728	0.069951	0.0744369	0.0740107	0.0729488	0.071862	0.071491	0.0733725	0.0730361	0.0742365	0.0773769	0.0742882	0.073907	0.0735586	0.0787785	0.0714252	0.0730685	0.0724753	0.0737522	0.0732695	0.072518	0.0710629	0.0726323	0.0718409	0.0756278	0.0745	0.0740116	0.0719479	0.0719802	0.0711856	0.0746991	0.0714356
95.7233		0.0719798	0.073498	0.0759112	0.0693646	0.0735406	0.0708378	0.0713504	0.0715526	0.0715665	0.0735263	0.0690953	0.071175	0.0793611	0.0710449	0.0718563	0.0736478	0.071273	0.0686432	0.0731646	0.072975	0.0718662	0.0702446	0.070068	0.0720538	0.0712242	0.0728542	0.0764794	0.0726966	0.0728161	0.0722672	0.0773598	0.0700994	0.0722429	0.071282	0.072476	0.072287	0.0715902	0.0697555	0.0717045	0.0707049	0.0743524	0.0734118	0.0727298	0.0702869	0.0704246	0.0702306	0.0736456	0.0704574
96.1255		0.0704306	0.0726866	0.0749436	0.0682964	0.0723237	0.0697423	0.0703821	0.0703159	0.0702636	0.0725186	0.0686197	0.0700991	0.0780382	0.0697053	0.0707897	0.0723445	0.0703239	0.0674324	0.0718197	0.0718202	0.0708523	0.0687781	0.0686938	0.0709252	0.0694197	0.0714415	0.0755886	0.0710209	0.0718837	0.0708339	0.0760519	0.0687546	0.0714728	0.0701293	0.071235	0.0713661	0.0706842	0.0685746	0.0706988	0.0695768	0.0728826	0.0722478	0.0713919	0.0687386	0.0688872	0.0692504	0.0726524	0.0695708
96.5277		0.0688882	0.0718405	0.0740903	0.0672541	0.0709426	0.0687149	0.0693166	0.0691176	0.0691686	0.0714888	0.0680975	0.0690664	0.0766764	0.0684409	0.0698485	0.071016	0.069429	0.0663191	0.0704274	0.0705618	0.0699111	0.0674946	0.0674371	0.0700073	0.0676911	0.0700416	0.0747068	0.0693593	0.0711311	0.0692996	0.074876	0.0674183	0.0707293	0.0690292	0.0700371	0.0704804	0.0698344	0.067557	0.0695988	0.0684785	0.0712814	0.0710213	0.0700691	0.067325	0.0674259	0.0682219	0.0716768	0.0687751
96.9299		0.0674273	0.0709425	0.0733108	0.0662406	0.0694203	0.0677432	0.0681425	0.0680022	0.0682794	0.0704511	0.0675205	0.0680348	0.0752705	0.0672394	0.0689919	0.069719	0.0685733	0.0652964	0.0690232	0.0692373	0.0690256	0.0664046	0.066334	0.0692784	0.0660814	0.068695	0.0738412	0.0678054	0.0705521	0.0677368	0.0738463	0.0661168	0.0699766	0.0679845	0.0688928	0.0696086	0.0690665	0.0667172	0.0684195	0.0674138	0.0696396	0.0697621	0.0688342	0.0660502	0.0660907	0.0671309	0.0706569	0.0680592
97.3321		0.0661121	0.0699807	0.0725427	0.0652374	0.0678011	0.0667998	0.0668629	0.0670033	0.0675691	0.0694158	0.0668798	0.066966	0.073814	0.0660813	0.0681708	0.0685011	0.0677216	0.064348	0.0676433	0.0678945	0.0681633	0.065494	0.0653769	0.0686817	0.0645978	0.0674352	0.0730032	0.0664276	0.0701104	0.0662356	0.0729611	0.0648696	0.0691767	0.0669869	0.067816	0.06874	0.0683789	0.0660439	0.0672074	0.0663686	0.068055	0.0685117	0.0677388	0.0649108	0.0649152	0.0659778	0.0695321	0.0674045
97.7343		0.0649845	0.0689534	0.0717109	0.064207	0.0661433	0.0658424	0.0655001	0.0661326	0.0669951	0.0683867	0.0661556	0.0658377	0.0723039	0.064949	0.0673369	0.0673862	0.0668242	0.0634456	0.0663162	0.0665774	0.0672874	0.0647265	0.0645168	0.0681419	0.0632156	0.0662871	0.0722065	0.0652556	0.0697455	0.0648826	0.0721943	0.0636882	0.0682974	0.0660183	0.0668211	0.0678764	0.0677323	0.0654985	0.066032	0.0653167	0.066611	0.0673159	0.0667958	0.063906	0.0639113	0.0647818	0.0682664	0.066789
98.1365		0.0640573	0.0678713	0.0707423	0.0631054	0.064507	0.0648201	0.0640968	0.0653751	0.066509	0.0673627	0.0653151	0.0646504	0.0707472	0.0638354	0.0664521	0.0663685	0.0658305	0.0625509	0.065057	0.0653129	0.0663699	0.0640505	0.06368	0.067585	0.061894	0.0652643	0.0714636	0.0642766	0.0693848	0.0637389	0.0714917	0.0625761	0.0673206	0.065056	0.0659173	0.0670294	0.0670535	0.0650194	0.0649723	0.0642288	0.0653605	0.0662173	0.0659733	0.0630404	0.0630661	0.0635798	0.0668676	0.0661894
98.5387		0.0633135	0.0667574	0.0695827	0.0619014	0.0629443	0.0636858	0.0627111	0.0646936	0.066064	0.0663435	0.0643208	0.0634286	0.0691655	0.0627472	0.0654956	0.0654157	0.0647079	0.0616222	0.0638683	0.0641046	0.0654028	0.0634111	0.0627924	0.0669582	0.0605975	0.0643681	0.0707814	0.0634436	0.0689592	0.0628236	0.0707751	0.0615317	0.0662492	0.0640785	0.0651017	0.0662166	0.0662523	0.0645318	0.0641013	0.0630809	0.0643196	0.0652486	0.0652025	0.0623178	0.0623449	0.0624206	0.0653922	0.0655802
98.9409		0.0627095	0.0656403	0.0682125	0.0605948	0.0614906	0.0624118	0.061406	0.0640408	0.0656175	0.0653358	0.0631485	0.062214	0.0675961	0.061703	0.0644672	0.0644814	0.0634587	0.0606248	0.0627434	0.062936	0.0644031	0.0627628	0.0618037	0.0662408	0.0593133	0.0635851	0.070156	0.0626909	0.0684167	0.0621051	0.0699562	0.0605506	0.0651105	0.0630725	0.0643529	0.0654549	0.0652468	0.0639622	0.0634716	0.0618596	0.0634726	0.064429	0.064397	0.0617298	0.0616958	0.0613554	0.0639336	0.0649317
99.3431		0.0621803	0.0645449	0.0666546	0.0592263	0.0601614	0.0610024	0.0602365	0.0633755	0.0651298	0.0643565	0.0618064	0.0610557	0.0660896	0.0607265	0.0633854	0.0635211	0.0621275	0.0595422	0.0616714	0.0617807	0.06341	0.0620786	0.0607019	0.0654445	0.0580557	0.0628856	0.0695674	0.0619544	0.0677287	0.0615037	0.0689558	0.059627	0.0639528	0.0620366	0.0636295	0.0647544	0.0639864	0.063255	0.0631029	0.0605622	0.0627812	0.0637618	0.0634774	0.0612441	0.0610566	0.0604249	0.0625945	0.0642092
99.7453		0.0616472	0.0634817	0.0649731	0.0578722	0.0589516	0.0594976	0.0592366	0.0626746	0.0645616	0.0634291	0.0603463	0.0599984	0.0647004	0.0598376	0.0622808	0.0625046	0.0607938	0.0583839	0.0606412	0.0606178	0.0624742	0.0613533	0.0595128	0.0646005	0.0568557	0.0622233	0.0689762	0.0611886	0.066889	0.0609042	0.0677244	0.0587519	0.0628356	0.0609815	0.0628745	0.0641136	0.0624645	0.0623854	0.0629717	0.0591944	0.0621948	0.0632326	0.0623939	0.0608017	0.0603626	0.0596496	0.061452	0.0633748
100.147		0.0610268	0.0624404	0.0632609	0.0566265	0.0578362	0.0579647	0.0584122	0.0619379	0.0638757	0.0625745	0.0588601	0.0590719	0.063474	0.0590441	0.0611859	0.061421	0.0595495	0.0571846	0.0596405	0.0594432	0.061641	0.0605982	0.0582855	0.063738	0.0557407	0.0615387	0.0683253	0.0603762	0.0659041	0.0601774	0.0662564	0.0579114	0.0618127	0.059925	0.0620275	0.0635169	0.0607172	0.0613636	0.063004	0.0577673	0.0616568	0.0628063	0.0611383	0.0603251	0.0595541	0.0590243	0.0605289	0.0623944
100.55		0.0602433	0.0613901	0.0616198	0.0555734	0.0567732	0.0564796	0.0577424	0.0611799	0.0630432	0.061797	0.0574592	0.0582848	0.0624317	0.0583376	0.0601244	0.0602735	0.0584703	0.0559964	0.0586528	0.0582716	0.0609334	0.0598304	0.0570717	0.0628623	0.0547138	0.0607666	0.0675485	0.0595264	0.064782	0.059207	0.0645948	0.0570851	0.0609158	0.0588841	0.0610425	0.0629352	0.0588108	0.0602282	0.0630756	0.0562962	0.0611072	0.0624253	0.059744	0.0597375	0.0585856	0.0585202	0.0597808	0.0612478
100.952		0.059243	0.0602878	0.060139	0.0547624	0.055707	0.0551048	0.0571874	0.0604152	0.0620563	0.0610734	0.0562426	0.057622	0.0615594	0.0576939	0.0591036	0.0590698	0.0575908	0.0548744	0.0576541	0.0571288	0.0603389	0.0590602	0.0559072	0.0619422	0.0537447	0.0598473	0.0665855	0.0586622	0.0635248	0.057917	0.0628235	0.0562478	0.0601418	0.0578655	0.0599062	0.0623295	0.0568255	0.0590305	0.0630239	0.054804	0.0604854	0.0620097	0.0582743	0.0589852	0.0574348	0.0580928	0.0591069	0.0599373
101.354		0.0580065	0.059093	0.0588776	0.0541926	0.0545777	0.0538714	0.0567005	0.0596416	0.0609407	0.0603506	0.0552638	0.0570463	0.0608054	0.0570772	0.0581107	0.0578128	0.0568944	0.0538598	0.0566126	0.0560353	0.0598074	0.0582833	0.0548051	0.0609131	0.0527775	0.0587399	0.0653996	0.0578019	0.0621294	0.0562929	0.0610501	0.0553743	0.0594494	0.05686	0.0586517	0.0616581	0.0548422	0.0578152	0.0626744	0.0533251	0.0597366	0.0614643	0.0568045	0.0580559	0.0561113	0.0576944	0.0583803	0.0584945
101.756		0.0565553	0.0577818	0.0578554	0.0538114	0.0533339	0.052773	0.0562395	0.0588312	0.0597636	0.0595553	0.0545103	0.0565043	0.0600909	0.0564465	0.057117	0.0564981	0.0563206	0.0529674	0.0554951	0.0549903	0.0592624	0.0574815	0.0537607	0.0596985	0.0517532	0.0574334	0.063991	0.0569421	0.0605971	0.0543907	0.0593838	0.0544469	0.0587665	0.0558421	0.0573595	0.0608849	0.0529365	0.0566052	0.0618789	0.0519101	0.0588246	0.0606924	0.0554053	0.0569847	0.0546612	0.0572843	0.0574889	0.0569787
102.158		0.0549496	0.0563578	0.0570521	0.0535297	0.0519506	0.0517749	0.0557711	0.0579353	0.0586291	0.0586155	0.0539015	0.0559353	0.0593314	0.055763	0.0560857	0.0551206	0.055789	0.0521798	0.0542785	0.0539637	0.0586243	0.0566339	0.0527665	0.0582421	0.0506385	0.0559539	0.0624029	0.0560513	0.0589467	0.052331	0.057916	0.0534627	0.0580069	0.054778	0.0561438	0.0599887	0.0511799	0.0553974	0.060557	0.0506249	0.0577473	0.059616	0.0541312	0.0558475	0.0531657	0.056835	0.0563723	0.0554709
102.561		0.0532765	0.0548554	0.0564146	0.0532454	0.0504449	0.0508349	0.0552712	0.0569037	0.0576593	0.0574865	0.0533106	0.055281	0.0584632	0.0549975	0.0549848	0.0536874	0.0552318	0.0514513	0.0529643	0.0529026	0.0578384	0.055733	0.0518263	0.0565378	0.0494465	0.0543627	0.0607138	0.0550764	0.0572235	0.05028	0.0567073	0.052438	0.05709	0.0536385	0.055125	0.0589704	0.0496422	0.0541697	0.0587275	0.0495435	0.056548	0.0581966	0.0530151	0.0547445	0.0517314	0.0563324	0.0550432	0.0540619
102.963		0.0516327	0.0533344	0.0558686	0.0528703	0.0488832	0.0499288	0.0547204	0.0557106	0.0569643	0.0561731	0.0526028	0.0544956	0.0574665	0.0541374	0.0537983	0.0522304	0.0546204	0.0507185	0.0515898	0.0517508	0.0569006	0.0547984	0.0509629	0.0546458	0.0482408	0.0527471	0.059021	0.0539625	0.0554972	0.04842	0.0557825	0.0514066	0.0559596	0.0524132	0.0543931	0.0578546	0.0483901	0.0528973	0.0565148	0.0487322	0.0553161	0.0564516	0.0520668	0.0537797	0.0504724	0.0557727	0.0535844	0.0528394
103.365		0.0501074	0.0518702	0.0553344	0.0523496	0.0473734	0.0490686	0.0541018	0.0543773	0.0566093	0.0547374	0.0516791	0.0535533	0.0563729	0.0531918	0.0525329	0.0508106	0.0539757	0.0499165	0.0502276	0.0504759	0.0558677	0.0538812	0.0502132	0.0526854	0.0471169	0.0512038	0.0574157	0.0526767	0.0538483	0.0469152	0.0551322	0.0504123	0.0545957	0.0511204	0.0539739	0.0566843	0.0474771	0.0515675	0.0541249	0.0482294	0.0541714	0.0544593	0.0512727	0.053041	0.0494866	0.0551574	0.0521241	0.0518732
103.767		0.0487688	0.0505392	0.054744	0.0516715	0.0460427	0.0483042	0.0534034	0.0529787	0.0565913	0.0532873	0.05051	0.0524518	0.0552557	0.0521935	0.0512155	0.0495088	0.0533546	0.0489943	0.0489727	0.0490919	0.0548449	0.0530512	0.0496113	0.0508084	0.0461672	0.0498168	0.0559604	0.0512275	0.0523451	0.0458764	0.054717	0.049496	0.053017	0.0498066	0.0538069	0.0555082	0.0469285	0.0501874	0.0517942	0.0480242	0.0532344	0.0523493	0.0505961	0.0525817	0.0488335	0.0544917	0.0507962	0.0512019
104.169		0.0476577	0.0494037	0.0540553	0.0508644	0.0450045	0.0477062	0.0526246	0.0516276	0.0568336	0.0519487	0.0491446	0.0512106	0.0542033	0.0511947	0.0498825	0.048403	0.0528183	0.0479264	0.0479162	0.047667	0.0539495	0.0523712	0.0491663	0.0491605	0.0454419	0.0486372	0.0546726	0.0496684	0.0510218	0.0453329	0.0544729	0.0486825	0.0512738	0.048534	0.0537481	0.0543622	0.0467264	0.0487797	0.0497296	0.048045	0.0525901	0.0502789	0.0499785	0.0524069	0.048517	0.0537855	0.0497003	0.0508214
104.572		0.0467864	0.0484986	0.0532617	0.0499845	0.0443264	0.0473369	0.0517835	0.0504385	0.0572016	0.0508268	0.0476909	0.0498656	0.0532868	0.0502551	0.0485617	0.0475412	0.0523959	0.0467175	0.0471162	0.0463109	0.0532642	0.0518659	0.0488434	0.0478489	0.0449216	0.047669	0.0535206	0.048084	0.0498686	0.0452195	0.0543188	0.0479707	0.0494344	0.0473591	0.0535989	0.0532521	0.0468036	0.0473683	0.0480578	0.0481628	0.0522587	0.0483997	0.0493454	0.0524649	0.0484812	0.053057	0.0488724	0.0506798
104.974		0.0461402	0.047822	0.0523902	0.049098	0.044006	0.0472208	0.0509191	0.0494856	0.0575328	0.0499714	0.0462743	0.0484635	0.0525354	0.0494248	0.047258	0.0469189	0.052062	0.0453995	0.0465742	0.0451442	0.0527984	0.0514974	0.0485578	0.0469221	0.0445139	0.0468677	0.0524336	0.046562	0.0488388	0.045385	0.0541644	0.047332	0.0475692	0.0463105	0.0531568	0.052144	0.0470519	0.0459631	0.0468024	0.0482137	0.0521836	0.0468249	0.0486178	0.052649	0.0486193	0.0523338	0.0482789	0.0506822
105.376		0.0456805	0.0473318	0.0514899	0.0482625	0.0439656	0.0473269	0.0500846	0.0487723	0.057669	0.0493544	0.0449938	0.0470568	0.0519287	0.0487252	0.0459491	0.046472	0.0517386	0.0440243	0.0462278	0.0442626	0.0524759	0.0511596	0.0481869	0.0463705	0.044076	0.046155	0.051323	0.0451648	0.0478716	0.045625	0.0539226	0.0467185	0.0457363	0.0453746	0.0522698	0.0509669	0.0473432	0.0445504	0.045893	0.0480345	0.0522416	0.0456067	0.0477286	0.0528095	0.0487948	0.05165	0.0478293	0.0507063
105.778		0.0453459	0.0469485	0.0506153	0.04751	0.0440678	0.0475713	0.0493361	0.0482274	0.0574824	0.0488697	0.0438904	0.0457034	0.0514074	0.0481355	0.0445976	0.0460889	0.0513213	0.0426556	0.0459634	0.0437107	0.052155	0.0506963	0.0475986	0.0461402	0.043458	0.0454449	0.0501078	0.0439105	0.0469202	0.0457289	0.0535216	0.0460787	0.0439746	0.044496	0.0508769	0.0496297	0.0475574	0.0430968	0.0451995	0.0475006	0.0522742	0.0447317	0.0466411	0.0527763	0.0488676	0.0510383	0.0474044	0.0506273
106.18		0.0450561	0.0465661	0.0498086	0.0468388	0.0441509	0.0478361	0.0487194	0.0477313	0.0568899	0.0483546	0.0429405	0.0444661	0.0508974	0.047591	0.043178	0.045636	0.0507204	0.0413635	0.0456465	0.0434759	0.0516709	0.0499395	0.0466889	0.0461529	0.0425525	0.0446724	0.0487392	0.042772	0.0459726	0.0455296	0.0529158	0.0453762	0.042303	0.043596	0.049022	0.0480499	0.0476075	0.0415691	0.0445789	0.0465557	0.0521288	0.0441353	0.0453629	0.052391	0.0487188	0.0505185	0.0468861	0.0503436
106.583		0.0447192	0.0460685	0.0490898	0.0462143	0.0440758	0.0479998	0.0482645	0.0471649	0.0558574	0.0476315	0.0420739	0.0434122	0.0503353	0.0469973	0.0417066	0.0449919	0.0499011	0.0402216	0.0451617	0.0435037	0.0508872	0.0487587	0.045417	0.0463211	0.0413355	0.0438152	0.0472146	0.0416938	0.0450542	0.044939	0.0520912	0.0446054	0.0407284	0.0426027	0.0468406	0.0461896	0.0474558	0.0399629	0.0439193	0.0452247	0.0516969	0.0437289	0.0439525	0.0515415	0.0482697	0.0500888	0.046186	0.0497971
106.985		0.0442456	0.0453545	0.0484545	0.0455825	0.0437679	0.0479673	0.0479861	0.0464618	0.0544007	0.0465587	0.0412134	0.0426071	0.0496885	0.0462612	0.0402605	0.0440789	0.0489048	0.0393029	0.0444506	0.0437258	0.0497399	0.0471064	0.043825	0.0465538	0.0398837	0.0428977	0.0455792	0.040621	0.0442131	0.0439638	0.0510618	0.0437961	0.0392576	0.0414833	0.0445261	0.0440857	0.0471146	0.0383287	0.0431682	0.0436082	0.0509381	0.0434315	0.0425134	0.0501948	0.0474913	0.049721	0.0452656	0.0489816
107.387		0.0435669	0.0443649	0.0478809	0.0448931	0.0432395	0.0476889	0.0478908	0.0456447	0.0525827	0.0450782	0.040319	0.0421027	0.0489625	0.0453286	0.0389747	0.0428853	0.0478417	0.0386714	0.0435315	0.0440854	0.0482619	0.0450461	0.0420338	0.0467533	0.0383592	0.0419767	0.0439121	0.0395286	0.0434909	0.042698	0.0498585	0.0430058	0.0379095	0.0402654	0.04229	0.041864	0.0466342	0.0367815	0.0423344	0.0418597	0.0498851	0.0431958	0.0411765	0.0484163	0.0464034	0.0493625	0.04415	0.0479396
107.789		0.0426541	0.043106	0.0473399	0.0441227	0.0425804	0.047164	0.0479807	0.0448269	0.0505072	0.0432451	0.0394211	0.0419199	0.0481968	0.0442154	0.03801	0.0414718	0.046852	0.0383664	0.0424917	0.0445482	0.0465805	0.0427512	0.0402134	0.0468121	0.0369643	0.0411138	0.0423004	0.0384406	0.0428931	0.0412964	0.0485118	0.0422969	0.0367211	0.0390368	0.0403217	0.0397205	0.046079	0.0354844	0.0414653	0.0401523	0.0486302	0.0430192	0.0400714	0.046365	0.0450651	0.0489448	0.0429294	0.0467474
108.191		0.0415267	0.0416593	0.0468042	0.0432899	0.0419181	0.0464286	0.048247	0.0441706	0.0483045	0.0412249	0.0386247	0.0420337	0.04745	0.0430148	0.0375004	0.039958	0.0460478	0.0383824	0.0414512	0.045091	0.044884	0.0404694	0.0385367	0.0466185	0.0358793	0.0403471	0.0408088	0.0374242	0.0423717	0.0399356	0.0470369	0.0417067	0.0357438	0.0379202	0.0387588	0.0378712	0.0454986	0.0346098	0.0406094	0.0386411	0.0472995	0.0429364	0.0392932	0.0442579	0.0435569	0.0483944	0.0417478	0.0454923
108.594		0.0402489	0.0401697	0.0462509	0.0424525	0.041362	0.0455338	0.0486504	0.0438128	0.0461052	0.0392539	0.0380786	0.0423658	0.0467826	0.0418729	0.0374934	0.0384892	0.0454563	0.0386542	0.0405085	0.0456754	0.0433684	0.0384624	0.0371321	0.0460763	0.0352072	0.0396752	0.0394556	0.0365614	0.0418309	0.0387707	0.0454296	0.0412175	0.0350286	0.0370295	0.0376663	0.0364841	0.044906	0.0342877	0.0397835	0.037431	0.0460214	0.0429955	0.0388747	0.04231	0.0419582	0.0476464	0.0407767	0.0442469
108.996		0.0389119	0.0388149	0.0456572	0.0416874	0.0409522	0.0445237	0.0490987	0.0437903	0.0440081	0.0375726	0.0379218	0.0427911	0.046243	0.040941	0.0379065	0.0371948	0.0449916	0.0390573	0.0396938	0.0462211	0.0421823	0.0369371	0.0360503	0.0451328	0.034947	0.0390616	0.0382046	0.035906	0.0411601	0.0378985	0.0436782	0.0407432	0.0346071	0.0364255	0.0370308	0.0356224	0.0442702	0.0345584	0.0389592	0.0365595	0.0448989	0.0432267	0.0387727	0.040675	0.040327	0.046655	0.040178	0.0430475
109.398		0.0376119	0.0377656	0.0449942	0.0410594	0.040634	0.0434237	0.0494345	0.0440007	0.0420522	0.0363536	0.0382277	0.0431554	0.0458626	0.0403234	0.0385227	0.0361532	0.0444689	0.0394291	0.0389502	0.0465973	0.0413925	0.0359936	0.0352551	0.0438045	0.0350027	0.0384585	0.0369777	0.0354493	0.0402799	0.0373363	0.0417906	0.0401414	0.0344753	0.0360879	0.0367657	0.0352269	0.043529	0.035343	0.0380738	0.0359975	0.0439882	0.0436183	0.0388748	0.0394118	0.0386882	0.0454042	0.0400653	0.0418855
109.8		0.0364304	0.037152	0.0442253	0.0405923	0.0402713	0.0422414	0.0494518	0.0442237	0.0402046	0.0356514	0.0389654	0.0433024	0.0456596	0.0400454	0.0390389	0.0353751	0.0436624	0.0396074	0.0381549	0.0466464	0.0409832	0.0356093	0.0346431	0.0421862	0.035225	0.0378392	0.0356861	0.0351132	0.0391835	0.037022	0.0398218	0.0392538	0.0345931	0.0359176	0.0367307	0.0351423	0.0426176	0.0364448	0.0370605	0.0356694	0.0432891	0.0441102	0.0390254	0.0384918	0.0370379	0.0439156	0.0404732	0.0407169
110.202		0.0354226	0.037049	0.0433146	0.0402539	0.039694	0.0409789	0.0489483	0.0441951	0.0383738	0.035392	0.0399863	0.0431034	0.0456485	0.0400537	0.0391651	0.0348143	0.0423922	0.039473	0.0371771	0.0462334	0.0408814	0.0356657	0.0340866	0.0404353	0.035468	0.0372218	0.0342695	0.0347762	0.0379519	0.0368333	0.0378883	0.0379613	0.0348992	0.0357713	0.0367631	0.0351754	0.041501	0.0375879	0.0358847	0.0354831	0.0427451	0.0446085	0.0390626	0.0378366	0.0353651	0.0422559	0.041342	0.0394882
110.605		0.0346149	0.0374796	0.0422464	0.0399614	0.0387648	0.0396524	0.047805	0.0437053	0.0364467	0.0354067	0.0410374	0.0424868	0.0458478	0.0402465	0.0387447	0.0343973	0.040609	0.038983	0.0359486	0.0453075	0.0409921	0.0360088	0.0334887	0.0387329	0.0356409	0.0366709	0.0327322	0.0343247	0.0367381	0.0366211	0.0361545	0.0362345	0.0353385	0.0355162	0.0367191	0.0351623	0.0401994	0.038487	0.0345733	0.035361	0.0422541	0.0450161	0.038856	0.0373668	0.0336854	0.0405376	0.0425215	0.0381676
111.007		0.034006	0.0384304	0.0410496	0.0396076	0.0374364	0.0383098	0.0460634	0.0426826	0.0343406	0.0354972	0.041802	0.0414608	0.0462813	0.0405172	0.037842	0.0340621	0.0384436	0.038184	0.0345197	0.0439458	0.0412243	0.0365163	0.0328312	0.0372351	0.0357374	0.0362752	0.0311612	0.0337073	0.0357273	0.0362501	0.0347907	0.0341618	0.0358862	0.0350846	0.0365142	0.0350196	0.0387959	0.0389314	0.0332225	0.0352593	0.0416894	0.0452707	0.0383379	0.0370407	0.0320725	0.0389094	0.0437946	0.0367699
111.409		0.0335706	0.039864	0.039814	0.0390943	0.0357773	0.0370425	0.0439565	0.0412296	0.0320531	0.0355042	0.0419695	0.0401219	0.0469692	0.0407905	0.0367495	0.0337896	0.036196	0.0372003	0.0330707	0.0423593	0.0415003	0.0371397	0.0321971	0.0360335	0.0358313	0.036106	0.0297163	0.0329709	0.0350875	0.03564	0.0339161	0.0319455	0.0365533	0.0345029	0.0361513	0.0347657	0.0374218	0.0388501	0.0319796	0.0351701	0.0409302	0.0453768	0.0375181	0.03687	0.030668	0.0375312	0.0449191	0.0353645
111.811		0.0332618	0.041718	0.0386851	0.0383595	0.0339563	0.0359832	0.0418569	0.0395996	0.0296897	0.0353515	0.0413288	0.0386366	0.0479091	0.0410357	0.0358966	0.0336162	0.0342618	0.036201	0.0318692	0.0408515	0.041752	0.0379008	0.0317553	0.035137	0.0360417	0.0361752	0.0285867	0.0322598	0.0349218	0.034799	0.0335462	0.0298678	0.0373651	0.0338803	0.0357225	0.0345008	0.036223	0.0383342	0.0309993	0.0351083	0.0398945	0.0454171	0.0364801	0.0369106	0.029657	0.0365366	0.0456842	0.0340637
112.213		0.0330144	0.0438871	0.0378311	0.0373839	0.0321988	0.0352834	0.0401487	0.0381183	0.0274508	0.0350476	0.0398636	0.0371957	0.0490529	0.0412521	0.0356959	0.0336209	0.0330222	0.0353558	0.0311847	0.0397364	0.0419139	0.0388388	0.0317112	0.0344822	0.0364779	0.0364134	0.0279229	0.0317695	0.0352365	0.0338382	0.033568	0.0282349	0.0383163	0.033358	0.0353789	0.0343506	0.0353175	0.0376058	0.0303911	0.035089	0.0385649	0.0455351	0.0353581	0.0372301	0.0292077	0.0359951	0.0459673	0.0329965
112.616		0.0327497	0.0461958	0.0373874	0.0361757	0.030734	0.0350703	0.0390809	0.0370774	0.0255754	0.0346489	0.0378043	0.0359527	0.0502904	0.0414374	0.0363918	0.0338888	0.032742	0.0347974	0.0311962	0.0392431	0.0419217	0.0399295	0.0322383	0.0339647	0.037188	0.0366821	0.0277695	0.0316693	0.0359321	0.0329534	0.0337603	0.0273118	0.0393214	0.0330416	0.0352827	0.034393	0.0347573	0.0369479	0.0301761	0.035106	0.0369982	0.0458888	0.0343017	0.0378631	0.0293972	0.035887	0.0457733	0.0322745
113.018		0.0323835	0.0483825	0.0374035	0.0347461	0.0297502	0.0353893	0.0386745	0.0366413	0.0242595	0.0342087	0.0355941	0.0349727	0.051451	0.0415574	0.0379618	0.0344669	0.0335076	0.0346049	0.0319255	0.0394392	0.04172	0.0410139	0.0334165	0.033477	0.0381316	0.0368206	0.0280302	0.0320258	0.0368271	0.03237	0.0338614	0.0272655	0.0401832	0.0329495	0.0355606	0.0346028	0.03451	0.0366156	0.0302688	0.0351198	0.0353119	0.046591	0.0334397	0.0387724	0.0301569	0.0361032	0.0452318	0.0319621
113.42		0.0318365	0.0501112	0.0378148	0.0330951	0.0293678	0.0361577	0.0387183	0.0368004	0.0235809	0.0337413	0.0337602	0.0342171	0.0523272	0.0415394	0.0400907	0.0353327	0.035214	0.034808	0.0332224	0.0402048	0.0412729	0.041776	0.0352006	0.0329419	0.0391872	0.0367073	0.0284891	0.0327619	0.0377084	0.0322646	0.0336641	0.0281344	0.0406034	0.0329959	0.0362791	0.0348435	0.0344655	0.0367512	0.0304882	0.0350606	0.0336555	0.0476589	0.032854	0.0398341	0.0312645	0.0364684	0.0445485	0.0320616
113.822		0.031048	0.0510171	0.0384493	0.0312233	0.0296229	0.0371489	0.0388398	0.0373848	0.0234653	0.0332156	0.0327382	0.0335664	0.052713	0.0412941	0.0422118	0.0363929	0.0375884	0.0354025	0.0347998	0.0412705	0.040571	0.0417955	0.0374288	0.0323284	0.0401886	0.0363056	0.0288792	0.0336716	0.0383962	0.0326947	0.0330992	0.0298321	0.0402435	0.0330138	0.0374435	0.034914	0.0344652	0.0373232	0.0305956	0.0348462	0.0321762	0.0489907	0.0325715	0.0408607	0.0323915	0.036779	0.0439292	0.0325178
114.224		0.0299887	0.0507819	0.0390634	0.0291662	0.0304605	0.0380232	0.0386074	0.038127	0.0237104	0.0325762	0.0327189	0.0328724	0.0524494	0.0407572	0.0436206	0.0375119	0.0402348	0.0363576	0.0363068	0.0423091	0.0396279	0.0406792	0.0398641	0.03165	0.040968	0.0356729	0.0289693	0.0344802	0.0388015	0.033566	0.0322706	0.0321784	0.0388318	0.0328051	0.0390152	0.0346304	0.034346	0.0381111	0.0303534	0.0344121	0.0309889	0.0503744	0.0325726	0.0416524	0.0331895	0.0368429	0.0435091	0.0332405
114.627		0.0286726	0.0492193	0.0393932	0.0270381	0.0317343	0.038397	0.0376345	0.038742	0.0240594	0.0317785	0.0335726	0.0320186	0.051469	0.0399307	0.0436664	0.0385572	0.042692	0.0376077	0.0374142	0.0430461	0.0384713	0.0382366	0.0422448	0.0309495	0.0413877	0.0349316	0.0286345	0.0349271	0.0389583	0.0346509	0.0314213	0.0349376	0.036287	0.0321986	0.0409304	0.033909	0.0339889	0.0387548	0.0295946	0.0337439	0.0301578	0.0515244	0.0328117	0.0420633	0.0333904	0.0365092	0.0433137	0.0341318
115.029		0.0271631	0.0463561	0.0392123	0.0250641	0.0332213	0.0379332	0.0356702	0.0389973	0.024298	0.0308259	0.0348685	0.030974	0.0498353	0.0389053	0.0419994	0.0394381	0.0445104	0.0390298	0.0378924	0.0433458	0.0371337	0.0346309	0.0443224	0.0302767	0.0413528	0.0342169	0.0278862	0.0348446	0.0390225	0.035646	0.0308433	0.03785	0.0328102	0.031101	0.043112	0.0328188	0.033364	0.038872	0.0282922	0.0329007	0.0296919	0.0521379	0.0332412	0.0420547	0.0328957	0.0356835	0.0432579	0.0351061
115.431		0.0255701	0.0424852	0.0383903	0.0235806	0.034661	0.0364321	0.0326717	0.0387518	0.024339	0.0297966	0.0359793	0.029822	0.0477702	0.0378513	0.0387758	0.040123	0.045346	0.0404271	0.0376643	0.0432468	0.0356502	0.0304254	0.0458811	0.0296666	0.04081	0.0336235	0.0268572	0.0342151	0.0392314	0.0362538	0.0307628	0.0406518	0.0288928	0.0295294	0.0454708	0.0315823	0.0325606	0.0382125	0.0266083	0.0320193	0.0295525	0.0519592	0.0338306	0.0417226	0.0318285	0.0343319	0.043176	0.0360958
115.833		0.0240355	0.038163	0.0369414	0.0229861	0.0358269	0.0339057	0.0288469	0.0379654	0.0242645	0.0288518	0.0362517	0.0287498	0.0456489	0.036973	0.034674	0.0406296	0.0450549	0.0415448	0.0368186	0.0429398	0.0340648	0.026475	0.0467488	0.0291222	0.0397472	0.0331738	0.0257487	0.0331914	0.0398289	0.0362677	0.031244	0.0430917	0.0252109	0.0276197	0.0479019	0.0305206	0.031791	0.0367875	0.0248989	0.0312941	0.0296708	0.050839	0.0345758	0.0412871	0.0305239	0.0324813	0.0428705	0.0370435
116.235		0.0227088	0.0341227	0.0350404	0.0236376	0.0366144	0.0306185	0.0246415	0.0366899	0.0243047	0.0282143	0.035205	0.0279925	0.0439423	0.0364327	0.0306564	0.0409941	0.0437492	0.0421346	0.0355773	0.0427001	0.0324398	0.0236856	0.0468165	0.0286044	0.0381955	0.0328237	0.0247594	0.0320737	0.0409719	0.0356426	0.0321547	0.0449598	0.0224306	0.025604	0.0502893	0.0299561	0.0313562	0.034908	0.0236532	0.0309366	0.0299674	0.0487721	0.0354956	0.0410499	0.0294406	0.0302224	0.0421677	0.0378903
116.638		0.0217197	0.031105	0.0329807	0.0257085	0.0371094	0.0270765	0.0206485	0.0350582	0.0247484	0.0281145	0.0326979	0.0277533	0.0430957	0.0362723	0.0275874	0.0412372	0.0417772	0.0420513	0.034223	0.0427934	0.0308584	0.0227431	0.0460781	0.0280324	0.0362308	0.0325083	0.0240226	0.031248	0.042655	0.034528	0.033221	0.0461302	0.021001	0.0237601	0.0525288	0.0301075	0.0315682	0.0331013	0.0233657	0.0311267	0.0303716	0.0459027	0.0366194	0.0413274	0.0290049	0.0277163	0.0409686	0.0385692
117.04		0.0211563	0.0296512	0.0310711	0.0290665	0.0375933	0.0239452	0.017454	0.0332817	0.0258095	0.0287146	0.0289844	0.0281339	0.0433788	0.0363795	0.0259233	0.0413483	0.0396207	0.0413278	0.0330091	0.0433718	0.0294103	0.0239329	0.0446774	0.0272983	0.0339623	0.0322103	0.0235751	0.0311057	0.0446939	0.0332458	0.0341573	0.0466068	0.0210332	0.0223442	0.0545643	0.0310156	0.0326464	0.0319375	0.0243739	0.0319685	0.0308353	0.0424936	0.0379726	0.0423782	0.0294461	0.0251872	0.039278	0.0390125
117.442		0.0210572	0.0299515	0.0295168	0.0332442	0.038459	0.0218937	0.0154825	0.0316475	0.0275058	0.030034	0.0246156	0.0291075	0.0447747	0.0365349	0.0256071	0.0413028	0.0377507	0.0401742	0.0320869	0.0443884	0.028163	0.0271152	0.0429302	0.0262981	0.0315045	0.0320074	0.0233645	0.0319704	0.0467778	0.0322146	0.034809	0.0465395	0.0223139	0.0215318	0.0564165	0.0325298	0.0346221	0.0318378	0.0267254	0.0334668	0.0313466	0.0388717	0.0395672	0.0443414	0.0307079	0.0228881	0.0372022	0.0391745
117.844		0.021418	0.0318211	0.0283535	0.0375437	0.0400569	0.0213956	0.0149191	0.0304938	0.0296175	0.0319028	0.020231	0.0305336	0.0469765	0.0365172	0.02616	0.0411068	0.0364997	0.0388962	0.0314783	0.0455655	0.0271326	0.0318283	0.0412863	0.0249747	0.0289468	0.0320638	0.0232844	0.0340478	0.0485584	0.0318433	0.0352248	0.0461868	0.0244278	0.0213908	0.0581838	0.0343562	0.037298	0.0329436	0.0301389	0.035528	0.0319397	0.0353712	0.0414014	0.0471999	0.0324879	0.0210347	0.0349138	0.0390609
118.246		0.0222049	0.0348084	0.0274668	0.0412354	0.0425199	0.0225575	0.0157287	0.0301412	0.0317516	0.0339644	0.0163484	0.0321964	0.0494889	0.0362006	0.0268878	0.0408431	0.0359924	0.0377791	0.0310945	0.0464446	0.0262684	0.0374368	0.0402299	0.0233606	0.0263393	0.0325587	0.0232192	0.0373921	0.049725	0.0324331	0.0356127	0.0458242	0.0269114	0.0218906	0.0600092	0.0361425	0.0402899	0.0350873	0.0340729	0.037986	0.0326995	0.0322892	0.0434679	0.0507829	0.0343772	0.0197321	0.0326001	0.0387513
118.649		0.0233665	0.0383692	0.0266767	0.0437572	0.0456257	0.0250568	0.0177292	0.0307801	0.0334719	0.0357301	0.0132506	0.0338476	0.0517735	0.0355861	0.0271286	0.0406816	0.0361394	0.0369964	0.0307845	0.046506	0.0254644	0.0432499	0.0401555	0.0216032	0.0237104	0.0335819	0.0230809	0.0418691	0.0500425	0.0341158	0.0362076	0.0456359	0.0293658	0.0229334	0.0620214	0.0375638	0.0431392	0.0378566	0.0378605	0.0406412	0.0337462	0.0298634	0.0457654	0.0548115	0.0360186	0.018933	0.0304196	0.0383991
119.051		0.0248338	0.0420209	0.0258347	0.0448373	0.0487372	0.0282268	0.0206559	0.0323534	0.0344242	0.0366758	0.0109868	0.0352498	0.0533657	0.0347642	0.0264907	0.0408381	0.0366799	0.0365786	0.0303943	0.0453098	0.0245911	0.0485806	0.0412641	0.0199561	0.0211161	0.0350379	0.0228252	0.0471064	0.0493601	0.0368403	0.03713	0.0456378	0.0315019	0.0243883	0.064262	0.0383861	0.0454485	0.0407169	0.0408475	0.0432953	0.0351948	0.0282642	0.048308	0.0589741	0.0372094	0.0184506	0.0284831	0.038199
119.453		0.0265095	0.0454278	0.0248966	0.0445258	0.0508566	0.0312557	0.0241831	0.0345063	0.0344115	0.0363658	0.009446	0.0362256	0.0539357	0.033845	0.0250169	0.041493	0.0372568	0.0364471	0.02983	0.0426119	0.0235366	0.0527644	0.0435007	0.0187263	0.0187016	0.0365904	0.0224483	0.0524526	0.0476181	0.0404029	0.0383138	0.0456622	0.0331299	0.0261181	0.0666098	0.0384976	0.0469819	0.0431523	0.0424969	0.0457668	0.0370956	0.0275919	0.0511296	0.0629989	0.0379204	0.0180172	0.0268612	0.0383328
119.855		0.0282495	0.0484113	0.0239513	0.0431736	0.0508438	0.033416	0.0279086	0.0366612	0.0334166	0.034587	0.00845165	0.0367153	0.0533128	0.0328949	0.0232076	0.0427028	0.0375168	0.036502	0.0291277	0.0384503	0.022245	0.0551866	0.0465348	0.0181833	0.0167408	0.0376756	0.0219704	0.0570095	0.0448695	0.044505	0.0395257	0.0454104	0.0341274	0.0280056	0.0687228	0.0379182	0.0476945	0.0447941	0.0424625	0.0478783	0.0393869	0.0278702	0.0542811	0.066689	0.0382511	0.0173664	0.0256081	0.0389146
120.257		0.0298521	0.0509124	0.0231926	0.0413881	0.0478427	0.0342413	0.0313362	0.0382197	0.0315919	0.0314748	0.00784992	0.0368313	0.0515104	0.0319084	0.0218596	0.0443343	0.0372258	0.0367358	0.0285195	0.0332246	0.0207408	0.0553673	0.0497926	0.0184476	0.0156074	0.0376161	0.0214311	0.0597977	0.0413083	0.0488164	0.0404469	0.0445572	0.034417	0.0299825	0.0700301	0.0367985	0.0476938	0.0455153	0.0406523	0.0494248	0.0418996	0.0290359	0.0578263	0.0699095	0.0383556	0.0163169	0.0247886	0.0399555
[truncated: 12 more columns]
