# Supplementary material
Source: MDPI journal article supplement (https://www.mdpi.com/2073-4441/13/11/1475)
Supplement: s1 [file s1 › Supplementary files/S2_2_02042018_File.xls]

## Sheet: Refraction
WL, cm-1	Runk sum	Runk sum	U	Z	p-level	Z	p-level	Valid N	Valid N	2*1sided	pcum
	hc	all set of preparations
1.2066	149	151	71	-0.057735	0.95396	-0.057735	0.95396	12	12	0.977402
1.60879	148	152	70	-0.11547	0.908073	-0.11547	0.908073	12	12	0.932301
2.01099	152	148	70	0.11547	0.908073	0.11547	0.908073	12	12	0.932301
2.41319	157	143	65	0.404145	0.686106	0.404145	0.686106	12	12	0.712535
2.81539	161	139	61	0.635085	0.525373	0.635085	0.525373	12	12	0.551167
3.21759	165	135	57	0.866025	0.386477	0.866025	0.386477	12	12	0.40951
3.61979	165	135	57	0.866025	0.386477	0.866025	0.386477	12	12	0.40951
4.02199	168	132	54	1.03923	0.298698	1.03923	0.298698	12	12	0.318585
4.42418	167	133	55	0.981495	0.326349	0.981495	0.326349	12	12	0.347358
4.82638	167	133	55	0.981495	0.326349	0.981495	0.326349	12	12	0.347358
5.22858	166	134	56	0.92376	0.355612	0.92376	0.355612	12	12	0.377685
5.63078	163	137	59	0.750555	0.452921	0.750555	0.452921	12	12	0.477575
6.03298	163	137	59	0.750555	0.452921	0.750555	0.452921	12	12	0.477575
6.43518	163	137	59	0.750555	0.452921	0.750555	0.452921	12	12	0.477575
6.83738	160	140	62	0.57735	0.563703	0.57735	0.563703	12	12	0.589876
7.23958	161	139	61	0.635085	0.525373	0.635085	0.525373	12	12	0.551167
7.64178	165	135	57	0.866025	0.386477	0.866025	0.386477	12	12	0.40951
8.04397	168	132	54	1.03923	0.298698	1.03923	0.298698	12	12	0.318585
8.44617	173	127	49	1.32791	0.18421	1.32791	0.18421	12	12	0.197808
8.84837	171	129	51	1.21244	0.225347	1.21244	0.225347	12	12	0.241524
9.25057	172	128	50	1.27017	0.204025	1.27017	0.204025	12	12	0.218921
9.65277	171	129	51	1.21244	0.225347	1.21244	0.225347	12	12	0.241524
10.055	170	130	52	1.1547	0.248214	1.1547	0.248214	12	12	0.26567
10.4572	169	131	53	1.09697	0.272657	1.09697	0.272657	12	12	0.291343
10.8594	169	131	53	1.09697	0.272657	1.09697	0.272657	12	12	0.291343
11.2616	169	131	53	1.09697	0.272657	1.09697	0.272657	12	12	0.291343
11.6638	169	131	53	1.09697	0.272657	1.09697	0.272657	12	12	0.291343
12.066	168	132	54	1.03923	0.298698	1.03923	0.298698	12	12	0.318585
12.4682	168	132	54	1.03923	0.298698	1.03923	0.298698	12	12	0.318585
12.8704	167	133	55	0.981495	0.326349	0.981495	0.326349	12	12	0.347358
13.2726	167	133	55	0.981495	0.326349	0.981495	0.326349	12	12	0.347358
13.6748	167	133	55	0.981495	0.326349	0.981495	0.326349	12	12	0.347358
14.077	169	131	53	1.09697	0.272657	1.09697	0.272657	12	12	0.291343
14.4792	169	131	53	1.09697	0.272657	1.09697	0.272657	12	12	0.291343
14.8814	169	131	53	1.09697	0.272657	1.09697	0.272657	12	12	0.291343
15.2836	169	131	53	1.09697	0.272657	1.09697	0.272657	12	12	0.291343
15.6858	171	129	51	1.21244	0.225347	1.21244	0.225347	12	12	0.241524
16.088	171	129	51	1.21244	0.225347	1.21244	0.225347	12	12	0.241524
16.4901	171	129	51	1.21244	0.225347	1.21244	0.225347	12	12	0.241524
16.8923	171	129	51	1.21244	0.225347	1.21244	0.225347	12	12	0.241524
17.2945	171	129	51	1.21244	0.225347	1.21244	0.225347	12	12	0.241524
17.6967	171	129	51	1.21244	0.225347	1.21244	0.225347	12	12	0.241524
18.0989	171	129	51	1.21244	0.225347	1.21244	0.225347	12	12	0.241524
18.5011	171	129	51	1.21244	0.225347	1.21244	0.225347	12	12	0.241524
18.9033	171	129	51	1.21244	0.225347	1.21244	0.225347	12	12	0.241524
19.3055	171	129	51	1.21244	0.225347	1.21244	0.225347	12	12	0.241524
19.7077	171	129	51	1.21244	0.225347	1.21244	0.225347	12	12	0.241524
20.1099	171	129	51	1.21244	0.225347	1.21244	0.225347	12	12	0.241524
20.5121	171	129	51	1.21244	0.225347	1.21244	0.225347	12	12	0.241524
20.9143	170	130	52	1.1547	0.248214	1.1547	0.248214	12	12	0.26567
21.3165	170	130	52	1.1547	0.248214	1.1547	0.248214	12	12	0.26567
21.7187	170	130	52	1.1547	0.248214	1.1547	0.248214	12	12	0.26567
22.1209	169	131	53	1.09697	0.272657	1.09697	0.272657	12	12	0.291343
22.5231	171	129	51	1.21244	0.225347	1.21244	0.225347	12	12	0.241524
22.9253	171	129	51	1.21244	0.225347	1.21244	0.225347	12	12	0.241524
23.3275	171	129	51	1.21244	0.225347	1.21244	0.225347	12	12	0.241524
23.7297	171	129	51	1.21244	0.225347	1.21244	0.225347	12	12	0.241524
24.1319	171	129	51	1.21244	0.225347	1.21244	0.225347	12	12	0.241524
24.5341	172	128	50	1.27017	0.204025	1.27017	0.204025	12	12	0.218921
24.9363	172	128	50	1.27017	0.204025	1.27017	0.204025	12	12	0.218921
25.3385	170	130	52	1.1547	0.248214	1.1547	0.248214	12	12	0.26567
25.7407	170	130	52	1.1547	0.248214	1.1547	0.248214	12	12	0.26567
26.1429	170	130	52	1.1547	0.248214	1.1547	0.248214	12	12	0.26567
26.5451	170	130	52	1.1547	0.248214	1.1547	0.248214	12	12	0.26567
26.9473	170	130	52	1.1547	0.248214	1.1547	0.248214	12	12	0.26567
27.3495	170	130	52	1.1547	0.248214	1.1547	0.248214	12	12	0.26567
27.7517	171	129	51	1.21244	0.225347	1.21244	0.225347	12	12	0.241524
28.1539	171	129	51	1.21244	0.225347	1.21244	0.225347	12	12	0.241524
28.5561	171	129	51	1.21244	0.225347	1.21244	0.225347	12	12	0.241524
28.9583	171	129	51	1.21244	0.225347	1.21244	0.225347	12	12	0.241524
29.3605	170	130	52	1.1547	0.248214	1.1547	0.248214	12	12	0.26567
29.7627	170.5	129.5	51.5	1.18357	0.236585	1.18383	0.236483	12	12	0.241524
30.1649	171	129	51	1.21244	0.225347	1.21244	0.225347	12	12	0.241524
30.5671	171	129	51	1.21244	0.225347	1.21244	0.225347	12	12	0.241524
30.9693	171	129	51	1.21244	0.225347	1.21244	0.225347	12	12	0.241524
31.3715	171	129	51	1.21244	0.225347	1.21244	0.225347	12	12	0.241524
31.7737	171	129	51	1.21244	0.225347	1.21244	0.225347	12	12	0.241524
32.1759	171	129	51	1.21244	0.225347	1.21244	0.225347	12	12	0.241524
32.5781	171	129	51	1.21244	0.225347	1.21244	0.225347	12	12	0.241524
32.9803	171	129	51	1.21244	0.225347	1.21244	0.225347	12	12	0.241524
33.3825	171	129	51	1.21244	0.225347	1.21244	0.225347	12	12	0.241524
33.7847	171	129	51	1.21244	0.225347	1.21244	0.225347	12	12	0.241524
34.1869	171	129	51	1.21244	0.225347	1.21244	0.225347	12	12	0.241524
34.5891	171	129	51	1.21244	0.225347	1.21244	0.225347	12	12	0.241524
34.9913	171	129	51	1.21244	0.225347	1.21244	0.225347	12	12	0.241524
35.3935	171	129	51	1.21244	0.225347	1.21244	0.225347	12	12	0.241524
35.7957	171	129	51	1.21244	0.225347	1.21244	0.225347	12	12	0.241524
36.1979	171	129	51	1.21244	0.225347	1.21244	0.225347	12	12	0.241524
36.6001	171	129	51	1.21244	0.225347	1.21244	0.225347	12	12	0.241524
37.0023	172	128	50	1.27017	0.204025	1.27017	0.204025	12	12	0.218921
37.4045	172	128	50	1.27017	0.204025	1.27017	0.204025	12	12	0.218921
37.8067	172	128	50	1.27017	0.204025	1.27017	0.204025	12	12	0.218921
38.2089	172	128	50	1.27017	0.204025	1.27017	0.204025	12	12	0.218921
38.6111	172	128	50	1.27017	0.204025	1.27017	0.204025	12	12	0.218921
39.0133	172	128	50	1.27017	0.204025	1.27017	0.204025	12	12	0.218921
39.4155	172	128	50	1.27017	0.204025	1.27017	0.204025	12	12	0.218921
39.8177	172	128	50	1.27017	0.204025	1.27017	0.204025	12	12	0.218921
40.2199	173	127	49	1.32791	0.18421	1.32791	0.18421	12	12	0.197808
40.6221	173	127	49	1.32791	0.18421	1.32791	0.18421	12	12	0.197808
41.0243	173	127	49	1.32791	0.18421	1.32791	0.18421	12	12	0.197808
41.4265	173	127	49	1.32791	0.18421	1.32791	0.18421	12	12	0.197808
41.8287	173	127	49	1.32791	0.18421	1.32791	0.18421	12	12	0.197808
42.2309	173	127	49	1.32791	0.18421	1.32791	0.18421	12	12	0.197808
42.6331	172	128	50	1.27017	0.204025	1.27017	0.204025	12	12	0.218921
43.0353	172	128	50	1.27017	0.204025	1.27017	0.204025	12	12	0.218921
43.4375	172	128	50	1.27017	0.204025	1.27017	0.204025	12	12	0.218921
43.8397	172	128	50	1.27017	0.204025	1.27017	0.204025	12	12	0.218921
44.2419	172	128	50	1.27017	0.204025	1.27017	0.204025	12	12	0.218921
44.6441	172	128	50	1.27017	0.204025	1.27017	0.204025	12	12	0.218921
45.0463	172	128	50	1.27017	0.204025	1.27045	0.203926	12	12	0.218921
45.4485	172	128	50	1.27017	0.204025	1.27017	0.204025	12	12	0.218921
45.8507	172	128	50	1.27017	0.204025	1.27017	0.204025	12	12	0.218921
46.2529	172	128	50	1.27017	0.204025	1.27017	0.204025	12	12	0.218921
46.6551	172	128	50	1.27017	0.204025	1.27017	0.204025	12	12	0.218921
47.0573	172	128	50	1.27017	0.204025	1.27017	0.204025	12	12	0.218921
47.4595	172	128	50	1.27017	0.204025	1.27017	0.204025	12	12	0.218921
47.8617	172	128	50	1.27017	0.204025	1.27017	0.204025	12	12	0.218921
48.2638	172	128	50	1.27017	0.204025	1.27017	0.204025	12	12	0.218921
48.666	172	128	50	1.27017	0.204025	1.27017	0.204025	12	12	0.218921
49.0682	172	128	50	1.27017	0.204025	1.27017	0.204025	12	12	0.218921
49.4704	172	128	50	1.27017	0.204025	1.27017	0.204025	12	12	0.218921
49.8726	172	128	50	1.27017	0.204025	1.27017	0.204025	12	12	0.218921
50.2748	172	128	50	1.27017	0.204025	1.27017	0.204025	12	12	0.218921
50.677	172	128	50	1.27017	0.204025	1.27017	0.204025	12	12	0.218921
51.0792	172	128	50	1.27017	0.204025	1.27017	0.204025	12	12	0.218921
51.4814	172	128	50	1.27017	0.204025	1.27017	0.204025	12	12	0.218921
51.8836	172	128	50	1.27017	0.204025	1.27017	0.204025	12	12	0.218921
52.2858	171	129	51	1.21244	0.225347	1.21244	0.225347	12	12	0.241524
52.688	171	129	51	1.21244	0.225347	1.21244	0.225347	12	12	0.241524
53.0902	171	129	51	1.21244	0.225347	1.21244	0.225347	12	12	0.241524
53.4924	171	129	51	1.21244	0.225347	1.21244	0.225347	12	12	0.241524
53.8946	171	129	51	1.21244	0.225347	1.21244	0.225347	12	12	0.241524
54.2968	171	129	51	1.21244	0.225347	1.21244	0.225347	12	12	0.241524
54.699	171	129	51	1.21244	0.225347	1.21244	0.225347	12	12	0.241524
55.1012	172	128	50	1.27017	0.204025	1.27017	0.204025	12	12	0.218921
55.5034	171	129	51	1.21244	0.225347	1.21244	0.225347	12	12	0.241524
55.9056	171	129	51	1.21244	0.225347	1.21244	0.225347	12	12	0.241524
56.3078	172	128	50	1.27017	0.204025	1.27017	0.204025	12	12	0.218921
56.71	172	128	50	1.27017	0.204025	1.27017	0.204025	12	12	0.218921
57.1122	172	128	50	1.27017	0.204025	1.27017	0.204025	12	12	0.218921
57.5144	172	128	50	1.27017	0.204025	1.27017	0.204025	12	12	0.218921
57.9166	172.5	127.5	49.5	1.29904	0.193932	1.29932	0.193835	12	12	0.197808
58.3188	173	127	49	1.32791	0.18421	1.32791	0.18421	12	12	0.197808
58.721	173	127	49	1.32791	0.18421	1.32791	0.18421	12	12	0.197808
59.1232	173	127	49	1.32791	0.18421	1.32791	0.18421	12	12	0.197808
59.5254	173	127	49	1.32791	0.18421	1.32791	0.18421	12	12	0.197808
59.9276	173	127	49	1.32791	0.18421	1.32791	0.18421	12	12	0.197808
60.3298	173	127	49	1.32791	0.18421	1.32791	0.18421	12	12	0.197808
60.732	173	127	49	1.32791	0.18421	1.32791	0.18421	12	12	0.197808
61.1342	173	127	49	1.32791	0.18421	1.32791	0.18421	12	12	0.197808
61.5364	173	127	49	1.32791	0.18421	1.32791	0.18421	12	12	0.197808
61.9386	173	127	49	1.32791	0.18421	1.32791	0.18421	12	12	0.197808
62.3408	173	127	49	1.32791	0.18421	1.32791	0.18421	12	12	0.197808
62.743	173	127	49	1.32791	0.18421	1.32791	0.18421	12	12	0.197808
63.1452	173	127	49	1.32791	0.18421	1.32791	0.18421	12	12	0.197808
63.5474	173	127	49	1.32791	0.18421	1.32791	0.18421	12	12	0.197808
63.9496	173	127	49	1.32791	0.18421	1.32791	0.18421	12	12	0.197808
64.3518	174	126	48	1.38564	0.165858	1.38564	0.165858	12	12	0.178182
64.754	174	126	48	1.38564	0.165858	1.38564	0.165858	12	12	0.178182
65.1562	174	126	48	1.38564	0.165858	1.38564	0.165858	12	12	0.178182
65.5584	173	127	49	1.32791	0.18421	1.32791	0.18421	12	12	0.197808
65.9606	173	127	49	1.32791	0.18421	1.32791	0.18421	12	12	0.197808
66.3628	173	127	49	1.32791	0.18421	1.32791	0.18421	12	12	0.197808
66.765	173	127	49	1.32791	0.18421	1.32791	0.18421	12	12	0.197808
67.1672	173	127	49	1.32791	0.18421	1.32791	0.18421	12	12	0.197808
67.5694	173	127	49	1.32791	0.18421	1.32791	0.18421	12	12	0.197808
67.9716	173	127	49	1.32791	0.18421	1.32791	0.18421	12	12	0.197808
68.3738	172	128	50	1.27017	0.204025	1.27017	0.204025	12	12	0.218921
68.776	171	129	51	1.21244	0.225347	1.21244	0.225347	12	12	0.241524
69.1782	171	129	51	1.21244	0.225347	1.21244	0.225347	12	12	0.241524
69.5804	171	129	51	1.21244	0.225347	1.21244	0.225347	12	12	0.241524
69.9826	171	129	51	1.21244	0.225347	1.21244	0.225347	12	12	0.241524
70.3848	171	129	51	1.21244	0.225347	1.21244	0.225347	12	12	0.241524
70.787	170	130	52	1.1547	0.248214	1.1547	0.248214	12	12	0.26567
71.1892	170	130	52	1.1547	0.248214	1.1547	0.248214	12	12	0.26567
71.5914	170	130	52	1.1547	0.248214	1.1547	0.248214	12	12	0.26567
71.9936	170	130	52	1.1547	0.248214	1.1547	0.248214	12	12	0.26567
72.3958	170	130	52	1.1547	0.248214	1.1547	0.248214	12	12	0.26567
72.798	171	129	51	1.21244	0.225347	1.21244	0.225347	12	12	0.241524
73.2002	171	129	51	1.21244	0.225347	1.21244	0.225347	12	12	0.241524
73.6024	171	129	51	1.21244	0.225347	1.21244	0.225347	12	12	0.241524
74.0046	171	129	51	1.21244	0.225347	1.21244	0.225347	12	12	0.241524
74.4068	171	129	51	1.21244	0.225347	1.21244	0.225347	12	12	0.241524
74.809	171	129	51	1.21244	0.225347	1.21244	0.225347	12	12	0.241524
75.2112	171	129	51	1.21244	0.225347	1.21244	0.225347	12	12	0.241524
75.6134	171	129	51	1.21244	0.225347	1.21244	0.225347	12	12	0.241524
76.0156	171.5	128.5	50.5	1.2413	0.214495	1.24157	0.214395	12	12	0.218921
76.4178	173	127	49	1.32791	0.18421	1.32791	0.18421	12	12	0.197808
76.82	173	127	49	1.32791	0.18421	1.32791	0.18421	12	12	0.197808
77.2222	173	127	49	1.32791	0.18421	1.32791	0.18421	12	12	0.197808
77.6244	173	127	49	1.32791	0.18421	1.32791	0.18421	12	12	0.197808
78.0266	173	127	49	1.32791	0.18421	1.32791	0.18421	12	12	0.197808
78.4288	173	127	49	1.32791	0.18421	1.32791	0.18421	12	12	0.197808
78.831	173	127	49	1.32791	0.18421	1.32791	0.18421	12	12	0.197808
79.2332	173	127	49	1.32791	0.18421	1.32791	0.18421	12	12	0.197808
79.6354	173.5	126.5	48.5	1.35677	0.174854	1.35707	0.174761	12	12	0.178182
80.0376	174	126	48	1.38564	0.165858	1.38564	0.165858	12	12	0.178182
80.4398	172	128	50	1.27017	0.204025	1.27017	0.204025	12	12	0.218921
80.842	171	129	51	1.21244	0.225347	1.21244	0.225347	12	12	0.241524
81.2442	170	130	52	1.1547	0.248214	1.1547	0.248214	12	12	0.26567
81.6464	170	130	52	1.1547	0.248214	1.1547	0.248214	12	12	0.26567
82.0485	170	130	52	1.1547	0.248214	1.1547	0.248214	12	12	0.26567
82.4507	170	130	52	1.1547	0.248214	1.1547	0.248214	12	12	0.26567
82.8529	171	129	51	1.21244	0.225347	1.21244	0.225347	12	12	0.241524
83.2551	170	130	52	1.1547	0.248214	1.1547	0.248214	12	12	0.26567
83.6573	168	132	54	1.03923	0.298698	1.03923	0.298698	12	12	0.318585
84.0595	169	131	53	1.09697	0.272657	1.09697	0.272657	12	12	0.291343
84.4617	169	131	53	1.09697	0.272657	1.09697	0.272657	12	12	0.291343
84.8639	168	132	54	1.03923	0.298698	1.03923	0.298698	12	12	0.318585
85.2661	168	132	54	1.03923	0.298698	1.03923	0.298698	12	12	0.318585
85.6683	168	132	54	1.03923	0.298698	1.03923	0.298698	12	12	0.318585
86.0705	168	132	54	1.03923	0.298698	1.03923	0.298698	12	12	0.318585
86.4727	168	132	54	1.03923	0.298698	1.03923	0.298698	12	12	0.318585
86.8749	168	132	54	1.03923	0.298698	1.03923	0.298698	12	12	0.318585
87.2771	169	131	53	1.09697	0.272657	1.09697	0.272657	12	12	0.291343
87.6793	169	131	53	1.09697	0.272657	1.09697	0.272657	12	12	0.291343
88.0815	169	131	53	1.09697	0.272657	1.09697	0.272657	12	12	0.291343
88.4837	168	132	54	1.03923	0.298698	1.03923	0.298698	12	12	0.318585
88.8859	166.5	133.5	55.5	0.952628	0.340779	0.952835	0.340674	12	12	0.347358
89.2881	166	134	56	0.92376	0.355612	0.92376	0.355612	12	12	0.377685
89.6903	166	134	56	0.92376	0.355612	0.92376	0.355612	12	12	0.377685
90.0925	166	134	56	0.92376	0.355612	0.92376	0.355612	12	12	0.377685
90.4947	167	133	55	0.981495	0.326349	0.981495	0.326349	12	12	0.347358
90.8969	169	131	53	1.09697	0.272657	1.09697	0.272657	12	12	0.291343
91.2991	171	129	51	1.21244	0.225347	1.21244	0.225347	12	12	0.241524
91.7013	171	129	51	1.21244	0.225347	1.21244	0.225347	12	12	0.241524
92.1035	172	128	50	1.27017	0.204025	1.27017	0.204025	12	12	0.218921
92.5057	172	128	50	1.27017	0.204025	1.27017	0.204025	12	12	0.218921
92.9079	172	128	50	1.27017	0.204025	1.27017	0.204025	12	12	0.218921
93.3101	173	127	49	1.32791	0.18421	1.32791	0.18421	12	12	0.197808
93.7123	173	127	49	1.32791	0.18421	1.32791	0.18421	12	12	0.197808
94.1145	173	127	49	1.32791	0.18421	1.32791	0.18421	12	12	0.197808
94.5167	171	129	51	1.21244	0.225347	1.21244	0.225347	12	12	0.241524
94.9189	173	127	49	1.32791	0.18421	1.32791	0.18421	12	12	0.197808
95.3211	174	126	48	1.38564	0.165858	1.38564	0.165858	12	12	0.178182
95.7233	175	125	47	1.44338	0.148916	1.44338	0.148916	12	12	0.159973
96.1255	174	126	48	1.38564	0.165858	1.38564	0.165858	12	12	0.178182
96.5277	174	126	48	1.38564	0.165858	1.38564	0.165858	12	12	0.178182
96.9299	175	125	47	1.44338	0.148916	1.44338	0.148916	12	12	0.159973
97.3321	173	127	49	1.32791	0.18421	1.32791	0.18421	12	12	0.197808
97.7343	173	127	49	1.32791	0.18421	1.32791	0.18421	12	12	0.197808
98.1365	173	127	49	1.32791	0.18421	1.32791	0.18421	12	12	0.197808
98.5387	173	127	49	1.32791	0.18421	1.32791	0.18421	12	12	0.197808
98.9409	172	128	50	1.27017	0.204025	1.27017	0.204025	12	12	0.218921
99.3431	174	126	48	1.38564	0.165858	1.38564	0.165858	12	12	0.178182
99.7453	178	122	44	1.61658	0.10597	1.61658	0.10597	12	12	0.113502
100.147	178	122	44	1.61658	0.10597	1.61658	0.10597	12	12	0.113502
100.55	179	121	43	1.67432	0.0940695	1.67432	0.0940695	12	12	0.10053
100.952	177	123	45	1.55885	0.119034	1.55885	0.119034	12	12	0.127688
101.354	175	125	47	1.44338	0.148916	1.44338	0.148916	12	12	0.159973
101.756	173	127	49	1.32791	0.18421	1.32791	0.18421	12	12	0.197808
102.158	170	130	52	1.1547	0.248214	1.1547	0.248214	12	12	0.26567
102.561	168	132	54	1.03923	0.298698	1.03923	0.298698	12	12	0.318585
102.963	166	134	56	0.92376	0.355612	0.92376	0.355612	12	12	0.377685
103.365	162	138	60	0.69282	0.488423	0.69282	0.488423	12	12	0.513723
103.767	164	136	58	0.80829	0.418924	0.80829	0.418924	12	12	0.442833
104.169	159	141	63	0.519615	0.603332	0.519615	0.603332	12	12	0.629726
104.572	167	133	55	0.981495	0.326349	0.981495	0.326349	12	12	0.347358
104.974	164	136	58	0.80829	0.418924	0.80829	0.418924	12	12	0.442833
105.376	161	139	61	0.635085	0.525373	0.635085	0.525373	12	12	0.551167
105.778	163	137	59	0.750555	0.452921	0.750555	0.452921	12	12	0.477575
106.18	160	140	62	0.57735	0.563703	0.57735	0.563703	12	12	0.589876
106.583	161	139	61	0.635085	0.525373	0.635085	0.525373	12	12	0.551167
106.985	154	146	68	0.23094	0.817361	0.23094	0.817361	12	12	0.842836
107.387	152	148	70	0.11547	0.908073	0.11547	0.908073	12	12	0.932301
107.789	145	155	67	-0.288675	0.77283	-0.288675	0.77283	12	12	0.798745
108.191	142	158	64	-0.46188	0.644168	-0.46188	0.644168	12	12	0.67066
108.594	138	162	60	-0.69282	0.488423	-0.69282	0.488423	12	12	0.513723
108.996	140	160	62	-0.57735	0.563703	-0.57735	0.563703	12	12	0.589876
109.398	139	161	61	-0.635085	0.525373	-0.635085	0.525373	12	12	0.551167
109.8	141	159	63	-0.519615	0.603332	-0.519615	0.603332	12	12	0.629726
110.202	145	155	67	-0.288675	0.77283	-0.288675	0.77283	12	12	0.798745
110.605	149	151	71	-0.057735	0.95396	-0.057735	0.95396	12	12	0.977402
111.007	151	149	71	0.057735	0.95396	0.057735	0.95396	12	12	0.977402
111.409	152	148	70	0.11547	0.908073	0.11547	0.908073	12	12	0.932301
111.811	149	151	71	-0.057735	0.95396	-0.057735	0.95396	12	12	0.977402
112.213	145	155	67	-0.288675	0.77283	-0.288675	0.77283	12	12	0.798745
112.616	143	157	65	-0.404145	0.686106	-0.404145	0.686106	12	12	0.712535
113.018	142	158	64	-0.46188	0.644168	-0.46188	0.644168	12	12	0.67066
113.42	137	163	59	-0.750555	0.452921	-0.750555	0.452921	12	12	0.477575
113.822	132	168	54	-1.03923	0.298698	-1.03923	0.298698	12	12	0.318585
114.224	128	172	50	-1.27017	0.204025	-1.27017	0.204025	12	12	0.218921
114.627	125	175	47	-1.44338	0.148916	-1.44338	0.148916	12	12	0.159973
115.029	123	177	45	-1.55885	0.119034	-1.55885	0.119034	12	12	0.127688
115.431	126	174	48	-1.38564	0.165858	-1.38564	0.165858	12	12	0.178182
115.833	128	172	50	-1.27017	0.204025	-1.27017	0.204025	12	12	0.218921
116.235	131.5	168.5	53.5	-1.0681	0.285477	-1.06833	0.285372	12	12	0.291343
116.638	139	161	61	-0.635085	0.525373	-0.635085	0.525373	12	12	0.551167
117.04	146	154	68	-0.23094	0.817361	-0.23094	0.817361	12	12	0.842836
117.442	147	153	69	-0.173205	0.86249	-0.173205	0.86249	12	12	0.887386
117.844	149	151	71	-0.057735	0.95396	-0.057735	0.95396	12	12	0.977402
118.246	153	147	69	0.173205	0.86249	0.173205	0.86249	12	12	0.887386
118.649	166	134	56	0.92376	0.355612	0.92376	0.355612	12	12	0.377685
119.051	166	134	56	0.92376	0.355612	0.92376	0.355612	12	12	0.377685
119.453	176	124	46	1.50111	0.133328	1.50111	0.133328	12	12	0.143168
119.855	185	115	37	2.02073	0.043309	2.02073	0.043309	12	12	0.044902	0.00201619
120.257	185	115	37	2.02073	0.043309	2.02073	0.043309	12	12	0.044902

## Sheet: Transmission
WL, cm-1	Runk sum	Runk sum	U	Z	p-level	Z	p-level	Valid N	Valid N	2*1sided	pcum
	hc	all set of preparations
1.2066	137	163	59	-0.750555	0.452921	-0.750555	0.452921	12	12	0.477575
1.60879	136	164	58	-0.80829	0.418924	-0.80829	0.418924	12	12	0.442833
2.01099	135	165	57	-0.866025	0.386477	-0.866025	0.386477	12	12	0.40951
2.41319	129	171	51	-1.21244	0.225347	-1.21244	0.225347	12	12	0.241524
2.81539	130	170	52	-1.1547	0.248214	-1.1547	0.248214	12	12	0.26567
3.21759	130	170	52	-1.1547	0.248214	-1.1547	0.248214	12	12	0.26567
3.61979	130	170	52	-1.1547	0.248214	-1.1547	0.248214	12	12	0.26567
4.02199	130	170	52	-1.1547	0.248214	-1.1547	0.248214	12	12	0.26567
4.42418	130	170	52	-1.1547	0.248214	-1.1547	0.248214	12	12	0.26567
4.82638	131	169	53	-1.09697	0.272657	-1.09697	0.272657	12	12	0.291343
5.22858	130	170	52	-1.1547	0.248214	-1.1547	0.248214	12	12	0.26567
5.63078	132	168	54	-1.03923	0.298698	-1.03923	0.298698	12	12	0.318585
6.03298	132	168	54	-1.03923	0.298698	-1.03923	0.298698	12	12	0.318585
6.43518	133	167	55	-0.981495	0.326349	-0.981495	0.326349	12	12	0.347358
6.83738	133	167	55	-0.981495	0.326349	-0.981495	0.326349	12	12	0.347358
7.23958	132	168	54	-1.03923	0.298698	-1.03923	0.298698	12	12	0.318585
7.64178	131	169	53	-1.09697	0.272657	-1.09697	0.272657	12	12	0.291343
8.04397	133	167	55	-0.981495	0.326349	-0.981495	0.326349	12	12	0.347358
8.44617	132	168	54	-1.03923	0.298698	-1.03923	0.298698	12	12	0.318585
8.84837	133	167	55	-0.981495	0.326349	-0.981495	0.326349	12	12	0.347358
9.25057	133	167	55	-0.981495	0.326349	-0.981495	0.326349	12	12	0.347358
9.65277	134	166	56	-0.92376	0.355612	-0.92376	0.355612	12	12	0.377685
10.055	134	166	56	-0.92376	0.355612	-0.92376	0.355612	12	12	0.377685
10.4572	134	166	56	-0.92376	0.355612	-0.92376	0.355612	12	12	0.377685
10.8594	134	166	56	-0.92376	0.355612	-0.92376	0.355612	12	12	0.377685
11.2616	133	167	55	-0.981495	0.326349	-0.981495	0.326349	12	12	0.347358
11.6638	132	168	54	-1.03923	0.298698	-1.03923	0.298698	12	12	0.318585
12.066	132	168	54	-1.03923	0.298698	-1.03923	0.298698	12	12	0.318585
12.4682	131	169	53	-1.09697	0.272657	-1.09697	0.272657	12	12	0.291343
12.8704	132	168	54	-1.03923	0.298698	-1.03923	0.298698	12	12	0.318585
13.2726	132	168	54	-1.03923	0.298698	-1.03923	0.298698	12	12	0.318585
13.6748	133	167	55	-0.981495	0.326349	-0.981495	0.326349	12	12	0.347358
14.077	133	167	55	-0.981495	0.326349	-0.981495	0.326349	12	12	0.347358
14.4792	133	167	55	-0.981495	0.326349	-0.981495	0.326349	12	12	0.347358
14.8814	134	166	56	-0.92376	0.355612	-0.92376	0.355612	12	12	0.377685
15.2836	134	166	56	-0.92376	0.355612	-0.92376	0.355612	12	12	0.377685
15.6858	135	165	57	-0.866025	0.386477	-0.866025	0.386477	12	12	0.40951
16.088	135	165	57	-0.866025	0.386477	-0.866025	0.386477	12	12	0.40951
16.4901	134	166	56	-0.92376	0.355612	-0.92376	0.355612	12	12	0.377685
16.8923	134	166	56	-0.92376	0.355612	-0.92376	0.355612	12	12	0.377685
17.2945	134	166	56	-0.92376	0.355612	-0.92376	0.355612	12	12	0.377685
17.6967	134	166	56	-0.92376	0.355612	-0.92376	0.355612	12	12	0.377685
18.0989	134	166	56	-0.92376	0.355612	-0.92376	0.355612	12	12	0.377685
18.5011	134	166	56	-0.92376	0.355612	-0.92376	0.355612	12	12	0.377685
18.9033	134	166	56	-0.92376	0.355612	-0.92376	0.355612	12	12	0.377685
19.3055	134	166	56	-0.92376	0.355612	-0.92376	0.355612	12	12	0.377685
19.7077	134	166	56	-0.92376	0.355612	-0.92376	0.355612	12	12	0.377685
20.1099	134	166	56	-0.92376	0.355612	-0.92376	0.355612	12	12	0.377685
20.5121	134	166	56	-0.92376	0.355612	-0.92376	0.355612	12	12	0.377685
20.9143	133	167	55	-0.981495	0.326349	-0.981495	0.326349	12	12	0.347358
21.3165	133	167	55	-0.981495	0.326349	-0.981495	0.326349	12	12	0.347358
21.7187	133	167	55	-0.981495	0.326349	-0.981495	0.326349	12	12	0.347358
22.1209	133	167	55	-0.981495	0.326349	-0.981495	0.326349	12	12	0.347358
22.5231	133	167	55	-0.981495	0.326349	-0.981495	0.326349	12	12	0.347358
22.9253	133	167	55	-0.981495	0.326349	-0.981495	0.326349	12	12	0.347358
23.3275	133	167	55	-0.981495	0.326349	-0.981495	0.326349	12	12	0.347358
23.7297	133	167	55	-0.981495	0.326349	-0.981495	0.326349	12	12	0.347358
24.1319	133	167	55	-0.981495	0.326349	-0.981495	0.326349	12	12	0.347358
24.5341	133	167	55	-0.981495	0.326349	-0.981495	0.326349	12	12	0.347358
24.9363	133	167	55	-0.981495	0.326349	-0.981495	0.326349	12	12	0.347358
25.3385	133	167	55	-0.981495	0.326349	-0.981495	0.326349	12	12	0.347358
25.7407	133	167	55	-0.981495	0.326349	-0.981495	0.326349	12	12	0.347358
26.1429	134	166	56	-0.92376	0.355612	-0.92376	0.355612	12	12	0.377685
26.5451	134	166	56	-0.92376	0.355612	-0.92376	0.355612	12	12	0.377685
26.9473	133	167	55	-0.981495	0.326349	-0.981495	0.326349	12	12	0.347358
27.3495	133	167	55	-0.981495	0.326349	-0.981495	0.326349	12	12	0.347358
27.7517	133	167	55	-0.981495	0.326349	-0.981495	0.326349	12	12	0.347358
28.1539	132	168	54	-1.03923	0.298698	-1.03923	0.298698	12	12	0.318585
28.5561	132	168	54	-1.03923	0.298698	-1.03923	0.298698	12	12	0.318585
28.9583	132	168	54	-1.03923	0.298698	-1.03923	0.298698	12	12	0.318585
29.3605	132	168	54	-1.03923	0.298698	-1.03923	0.298698	12	12	0.318585
29.7627	133	167	55	-0.981495	0.326349	-0.981495	0.326349	12	12	0.347358
30.1649	133	167	55	-0.981495	0.326349	-0.981495	0.326349	12	12	0.347358
30.5671	133	167	55	-0.981495	0.326349	-0.981495	0.326349	12	12	0.347358
30.9693	133	167	55	-0.981495	0.326349	-0.981495	0.326349	12	12	0.347358
31.3715	132	168	54	-1.03923	0.298698	-1.03923	0.298698	12	12	0.318585
31.7737	131	169	53	-1.09697	0.272657	-1.09697	0.272657	12	12	0.291343
32.1759	131	169	53	-1.09697	0.272657	-1.09697	0.272657	12	12	0.291343
32.5781	131	169	53	-1.09697	0.272657	-1.09697	0.272657	12	12	0.291343
32.9803	131	169	53	-1.09697	0.272657	-1.09697	0.272657	12	12	0.291343
33.3825	132	168	54	-1.03923	0.298698	-1.03923	0.298698	12	12	0.318585
33.7847	132	168	54	-1.03923	0.298698	-1.03923	0.298698	12	12	0.318585
34.1869	132	168	54	-1.03923	0.298698	-1.03923	0.298698	12	12	0.318585
34.5891	132	168	54	-1.03923	0.298698	-1.03923	0.298698	12	12	0.318585
34.9913	132	168	54	-1.03923	0.298698	-1.03923	0.298698	12	12	0.318585
35.3935	132	168	54	-1.03923	0.298698	-1.03923	0.298698	12	12	0.318585
35.7957	133	167	55	-0.981495	0.326349	-0.981495	0.326349	12	12	0.347358
36.1979	134	166	56	-0.92376	0.355612	-0.92376	0.355612	12	12	0.377685
36.6001	135	165	57	-0.866025	0.386477	-0.866025	0.386477	12	12	0.40951
37.0023	134	166	56	-0.92376	0.355612	-0.92376	0.355612	12	12	0.377685
37.4045	134	166	56	-0.92376	0.355612	-0.92376	0.355612	12	12	0.377685
37.8067	134	166	56	-0.92376	0.355612	-0.92376	0.355612	12	12	0.377685
38.2089	134	166	56	-0.92376	0.355612	-0.92376	0.355612	12	12	0.377685
38.6111	134	166	56	-0.92376	0.355612	-0.92376	0.355612	12	12	0.377685
39.0133	134	166	56	-0.92376	0.355612	-0.92376	0.355612	12	12	0.377685
39.4155	134	166	56	-0.92376	0.355612	-0.92376	0.355612	12	12	0.377685
39.8177	134	166	56	-0.92376	0.355612	-0.92376	0.355612	12	12	0.377685
40.2199	134	166	56	-0.92376	0.355612	-0.92376	0.355612	12	12	0.377685
40.6221	133	167	55	-0.981495	0.326349	-0.981495	0.326349	12	12	0.347358
41.0243	133	167	55	-0.981495	0.326349	-0.981495	0.326349	12	12	0.347358
41.4265	133	167	55	-0.981495	0.326349	-0.981495	0.326349	12	12	0.347358
41.8287	132	168	54	-1.03923	0.298698	-1.03923	0.298698	12	12	0.318585
42.2309	132	168	54	-1.03923	0.298698	-1.03923	0.298698	12	12	0.318585
42.6331	132	168	54	-1.03923	0.298698	-1.03923	0.298698	12	12	0.318585
43.0353	133	167	55	-0.981495	0.326349	-0.981495	0.326349	12	12	0.347358
43.4375	133	167	55	-0.981495	0.326349	-0.981495	0.326349	12	12	0.347358
43.8397	133	167	55	-0.981495	0.326349	-0.981495	0.326349	12	12	0.347358
44.2419	133	167	55	-0.981495	0.326349	-0.981495	0.326349	12	12	0.347358
44.6441	133	167	55	-0.981495	0.326349	-0.981495	0.326349	12	12	0.347358
45.0463	133	167	55	-0.981495	0.326349	-0.981495	0.326349	12	12	0.347358
45.4485	133	167	55	-0.981495	0.326349	-0.981495	0.326349	12	12	0.347358
45.8507	134	166	56	-0.92376	0.355612	-0.92376	0.355612	12	12	0.377685
46.2529	134	166	56	-0.92376	0.355612	-0.92376	0.355612	12	12	0.377685
46.6551	134	166	56	-0.92376	0.355612	-0.92376	0.355612	12	12	0.377685
47.0573	134	166	56	-0.92376	0.355612	-0.92376	0.355612	12	12	0.377685
47.4595	133	167	55	-0.981495	0.326349	-0.981495	0.326349	12	12	0.347358
47.8617	133	167	55	-0.981495	0.326349	-0.981495	0.326349	12	12	0.347358
48.2638	133	167	55	-0.981495	0.326349	-0.981495	0.326349	12	12	0.347358
48.666	133	167	55	-0.981495	0.326349	-0.981495	0.326349	12	12	0.347358
49.0682	133	167	55	-0.981495	0.326349	-0.981495	0.326349	12	12	0.347358
49.4704	133	167	55	-0.981495	0.326349	-0.981495	0.326349	12	12	0.347358
49.8726	133	167	55	-0.981495	0.326349	-0.981495	0.326349	12	12	0.347358
50.2748	133	167	55	-0.981495	0.326349	-0.981495	0.326349	12	12	0.347358
50.677	133	167	55	-0.981495	0.326349	-0.981495	0.326349	12	12	0.347358
51.0792	133	167	55	-0.981495	0.326349	-0.981495	0.326349	12	12	0.347358
51.4814	134	166	56	-0.92376	0.355612	-0.92376	0.355612	12	12	0.377685
51.8836	134	166	56	-0.92376	0.355612	-0.92376	0.355612	12	12	0.377685
52.2858	135	165	57	-0.866025	0.386477	-0.866025	0.386477	12	12	0.40951
52.688	134	166	56	-0.92376	0.355612	-0.92376	0.355612	12	12	0.377685
53.0902	135	165	57	-0.866025	0.386477	-0.866025	0.386477	12	12	0.40951
53.4924	136	164	58	-0.80829	0.418924	-0.80829	0.418924	12	12	0.442833
53.8946	135.5	164.5	57.5	-0.837158	0.402504	-0.83734	0.402402	12	12	0.40951
54.2968	135	165	57	-0.866025	0.386477	-0.866025	0.386477	12	12	0.40951
54.699	135.5	164.5	57.5	-0.837158	0.402504	-0.83734	0.402402	12	12	0.40951
55.1012	137	163	59	-0.750555	0.452921	-0.750555	0.452921	12	12	0.477575
55.5034	138	162	60	-0.69282	0.488423	-0.69282	0.488423	12	12	0.513723
55.9056	139	161	61	-0.635085	0.525373	-0.635085	0.525373	12	12	0.551167
56.3078	139	161	61	-0.635085	0.525373	-0.635085	0.525373	12	12	0.551167
56.71	139	161	61	-0.635085	0.525373	-0.635085	0.525373	12	12	0.551167
57.1122	138.5	161.5	60.5	-0.663953	0.506721	-0.664097	0.506629	12	12	0.513723
57.5144	138	162	60	-0.69282	0.488423	-0.69282	0.488423	12	12	0.513723
57.9166	138	162	60	-0.69282	0.488423	-0.69282	0.488423	12	12	0.513723
58.3188	137	163	59	-0.750555	0.452921	-0.750555	0.452921	12	12	0.477575
58.721	137	163	59	-0.750555	0.452921	-0.750555	0.452921	12	12	0.477575
59.1232	136	164	58	-0.80829	0.418924	-0.80829	0.418924	12	12	0.442833
59.5254	135	165	57	-0.866025	0.386477	-0.866025	0.386477	12	12	0.40951
59.9276	135	165	57	-0.866025	0.386477	-0.866025	0.386477	12	12	0.40951
60.3298	135	165	57	-0.866025	0.386477	-0.866025	0.386477	12	12	0.40951
60.732	136	164	58	-0.80829	0.418924	-0.80829	0.418924	12	12	0.442833
61.1342	134	166	56	-0.92376	0.355612	-0.92376	0.355612	12	12	0.377685
61.5364	134	166	56	-0.92376	0.355612	-0.92376	0.355612	12	12	0.377685
61.9386	133	167	55	-0.981495	0.326349	-0.981495	0.326349	12	12	0.347358
62.3408	134	166	56	-0.92376	0.355612	-0.92376	0.355612	12	12	0.377685
62.743	134	166	56	-0.92376	0.355612	-0.92376	0.355612	12	12	0.377685
63.1452	134	166	56	-0.92376	0.355612	-0.92376	0.355612	12	12	0.377685
63.5474	133	167	55	-0.981495	0.326349	-0.981495	0.326349	12	12	0.347358
63.9496	133	167	55	-0.981495	0.326349	-0.981495	0.326349	12	12	0.347358
64.3518	134	166	56	-0.92376	0.355612	-0.92376	0.355612	12	12	0.377685
64.754	135	165	57	-0.866025	0.386477	-0.866025	0.386477	12	12	0.40951
65.1562	134	166	56	-0.92376	0.355612	-0.92376	0.355612	12	12	0.377685
65.5584	134	166	56	-0.92376	0.355612	-0.92376	0.355612	12	12	0.377685
65.9606	136	164	58	-0.80829	0.418924	-0.80829	0.418924	12	12	0.442833
66.3628	137	163	59	-0.750555	0.452921	-0.750555	0.452921	12	12	0.477575
66.765	137	163	59	-0.750555	0.452921	-0.750555	0.452921	12	12	0.477575
67.1672	137	163	59	-0.750555	0.452921	-0.750555	0.452921	12	12	0.477575
67.5694	137	163	59	-0.750555	0.452921	-0.750555	0.452921	12	12	0.477575
67.9716	137	163	59	-0.750555	0.452921	-0.750555	0.452921	12	12	0.477575
68.3738	137	163	59	-0.750555	0.452921	-0.750555	0.452921	12	12	0.477575
68.776	137	163	59	-0.750555	0.452921	-0.750555	0.452921	12	12	0.477575
69.1782	138	162	60	-0.69282	0.488423	-0.692971	0.488328	12	12	0.513723
69.5804	138	162	60	-0.69282	0.488423	-0.69282	0.488423	12	12	0.513723
69.9826	138	162	60	-0.69282	0.488423	-0.69282	0.488423	12	12	0.513723
70.3848	138	162	60	-0.69282	0.488423	-0.69282	0.488423	12	12	0.513723
70.787	138	162	60	-0.69282	0.488423	-0.692971	0.488328	12	12	0.513723
71.1892	137	163	59	-0.750555	0.452921	-0.750555	0.452921	12	12	0.477575
71.5914	135	165	57	-0.866025	0.386477	-0.866025	0.386477	12	12	0.40951
71.9936	136	164	58	-0.80829	0.418924	-0.80829	0.418924	12	12	0.442833
72.3958	135	165	57	-0.866025	0.386477	-0.866025	0.386477	12	12	0.40951
72.798	134	166	56	-0.92376	0.355612	-0.92376	0.355612	12	12	0.377685
73.2002	134	166	56	-0.92376	0.355612	-0.92376	0.355612	12	12	0.377685
73.6024	136	164	58	-0.80829	0.418924	-0.80829	0.418924	12	12	0.442833
74.0046	134	166	56	-0.92376	0.355612	-0.92376	0.355612	12	12	0.377685
74.4068	134	166	56	-0.92376	0.355612	-0.92376	0.355612	12	12	0.377685
74.809	135	165	57	-0.866025	0.386477	-0.866025	0.386477	12	12	0.40951
75.2112	133	167	55	-0.981495	0.326349	-0.981495	0.326349	12	12	0.347358
75.6134	134	166	56	-0.92376	0.355612	-0.92376	0.355612	12	12	0.377685
76.0156	134	166	56	-0.92376	0.355612	-0.92376	0.355612	12	12	0.377685
76.4178	134	166	56	-0.92376	0.355612	-0.92376	0.355612	12	12	0.377685
76.82	135	165	57	-0.866025	0.386477	-0.866025	0.386477	12	12	0.40951
77.2222	134	166	56	-0.92376	0.355612	-0.92376	0.355612	12	12	0.377685
77.6244	135	165	57	-0.866025	0.386477	-0.866025	0.386477	12	12	0.40951
78.0266	134	166	56	-0.92376	0.355612	-0.92376	0.355612	12	12	0.377685
78.4288	133	167	55	-0.981495	0.326349	-0.981495	0.326349	12	12	0.347358
78.831	134	166	56	-0.92376	0.355612	-0.92376	0.355612	12	12	0.377685
79.2332	133	167	55	-0.981495	0.326349	-0.981495	0.326349	12	12	0.347358
79.6354	132	168	54	-1.03923	0.298698	-1.03923	0.298698	12	12	0.318585
80.0376	131	169	53	-1.09697	0.272657	-1.09697	0.272657	12	12	0.291343
80.4398	134	166	56	-0.92376	0.355612	-0.92376	0.355612	12	12	0.377685
80.842	133	167	55	-0.981495	0.326349	-0.981495	0.326349	12	12	0.347358
81.2442	135	165	57	-0.866025	0.386477	-0.866025	0.386477	12	12	0.40951
81.6464	134	166	56	-0.92376	0.355612	-0.92376	0.355612	12	12	0.377685
82.0485	135	165	57	-0.866025	0.386477	-0.866025	0.386477	12	12	0.40951
82.4507	136	164	58	-0.80829	0.418924	-0.80829	0.418924	12	12	0.442833
82.8529	135	165	57	-0.866025	0.386477	-0.866025	0.386477	12	12	0.40951
83.2551	135	165	57	-0.866025	0.386477	-0.866025	0.386477	12	12	0.40951
83.6573	136	164	58	-0.80829	0.418924	-0.80829	0.418924	12	12	0.442833
84.0595	137	163	59	-0.750555	0.452921	-0.750555	0.452921	12	12	0.477575
84.4617	137	163	59	-0.750555	0.452921	-0.750555	0.452921	12	12	0.477575
84.8639	140	160	62	-0.57735	0.563703	-0.57735	0.563703	12	12	0.589876
85.2661	140	160	62	-0.57735	0.563703	-0.57735	0.563703	12	12	0.589876
85.6683	140	160	62	-0.57735	0.563703	-0.57735	0.563703	12	12	0.589876
86.0705	141	159	63	-0.519615	0.603332	-0.519615	0.603332	12	12	0.629726
86.4727	141	159	63	-0.519615	0.603332	-0.519615	0.603332	12	12	0.629726
86.8749	140	160	62	-0.57735	0.563703	-0.57735	0.563703	12	12	0.589876
87.2771	142	158	64	-0.46188	0.644168	-0.46188	0.644168	12	12	0.67066
87.6793	140	160	62	-0.57735	0.563703	-0.57735	0.563703	12	12	0.589876
88.0815	139	161	61	-0.635085	0.525373	-0.635085	0.525373	12	12	0.551167
88.4837	141	159	63	-0.519615	0.603332	-0.519615	0.603332	12	12	0.629726
88.8859	141	159	63	-0.519615	0.603332	-0.519615	0.603332	12	12	0.629726
89.2881	140	160	62	-0.57735	0.563703	-0.57735	0.563703	12	12	0.589876
89.6903	136	164	58	-0.80829	0.418924	-0.80829	0.418924	12	12	0.442833
90.0925	134	166	56	-0.92376	0.355612	-0.92376	0.355612	12	12	0.377685
90.4947	137	163	59	-0.750555	0.452921	-0.750555	0.452921	12	12	0.477575
90.8969	137	163	59	-0.750555	0.452921	-0.750555	0.452921	12	12	0.477575
91.2991	142	158	64	-0.46188	0.644168	-0.46188	0.644168	12	12	0.67066
91.7013	146	154	68	-0.23094	0.817361	-0.23094	0.817361	12	12	0.842836
92.1035	146	154	68	-0.23094	0.817361	-0.23094	0.817361	12	12	0.842836
92.5057	148	152	70	-0.11547	0.908073	-0.11547	0.908073	12	12	0.932301
92.9079	149	151	71	-0.057735	0.95396	-0.057735	0.95396	12	12	0.977402
93.3101	153	147	69	0.173205	0.86249	0.173205	0.86249	12	12	0.887386
93.7123	153	147	69	0.173205	0.86249	0.173205	0.86249	12	12	0.887386
94.1145	152	148	70	0.11547	0.908073	0.11547	0.908073	12	12	0.932301
94.5167	150	150	72	0	1	0	1	12	12	1.0226
94.9189	147	153	69	-0.173205	0.86249	-0.173205	0.86249	12	12	0.887386
95.3211	144	156	66	-0.34641	0.729035	-0.34641	0.729035	12	12	0.755285
95.7233	145	155	67	-0.288675	0.77283	-0.288675	0.77283	12	12	0.798745
96.1255	144	156	66	-0.34641	0.729035	-0.34641	0.729035	12	12	0.755285
96.5277	146	154	68	-0.23094	0.817361	-0.23094	0.817361	12	12	0.842836
96.9299	147	153	69	-0.173205	0.86249	-0.173205	0.86249	12	12	0.887386
97.3321	143	157	65	-0.404145	0.686106	-0.404145	0.686106	12	12	0.712535
97.7343	142	158	64	-0.46188	0.644168	-0.46188	0.644168	12	12	0.67066
98.1365	139	161	61	-0.635085	0.525373	-0.635085	0.525373	12	12	0.551167
98.5387	138	162	60	-0.69282	0.488423	-0.69282	0.488423	12	12	0.513723
98.9409	137	163	59	-0.750555	0.452921	-0.750555	0.452921	12	12	0.477575
99.3431	137	163	59	-0.750555	0.452921	-0.750555	0.452921	12	12	0.477575
99.7453	133	167	55	-0.981495	0.326349	-0.981495	0.326349	12	12	0.347358
100.147	137	163	59	-0.750555	0.452921	-0.750555	0.452921	12	12	0.477575
100.55	139	161	61	-0.635085	0.525373	-0.635085	0.525373	12	12	0.551167
100.952	142	158	64	-0.46188	0.644168	-0.46188	0.644168	12	12	0.67066
101.354	140	160	62	-0.57735	0.563703	-0.57735	0.563703	12	12	0.589876
101.756	138	162	60	-0.69282	0.488423	-0.69282	0.488423	12	12	0.513723
102.158	133	167	55	-0.981495	0.326349	-0.981495	0.326349	12	12	0.347358
102.561	130	170	52	-1.1547	0.248214	-1.1547	0.248214	12	12	0.26567
102.963	129	171	51	-1.21244	0.225347	-1.21244	0.225347	12	12	0.241524
103.365	127	173	49	-1.32791	0.18421	-1.32791	0.18421	12	12	0.197808
103.767	126	174	48	-1.38564	0.165858	-1.38564	0.165858	12	12	0.178182
104.169	125	175	47	-1.44338	0.148916	-1.44338	0.148916	12	12	0.159973
104.572	127	173	49	-1.32791	0.18421	-1.32791	0.18421	12	12	0.197808
104.974	128	172	50	-1.27017	0.204025	-1.27017	0.204025	12	12	0.218921
105.376	135	165	57	-0.866025	0.386477	-0.866025	0.386477	12	12	0.40951
105.778	134	166	56	-0.92376	0.355612	-0.92376	0.355612	12	12	0.377685
106.18	146	154	68	-0.23094	0.817361	-0.23094	0.817361	12	12	0.842836
106.583	159	141	63	0.519615	0.603332	0.519615	0.603332	12	12	0.629726
106.985	171	129	51	1.21244	0.225347	1.21244	0.225347	12	12	0.241524
107.387	181	119	41	1.78979	0.0734893	1.78979	0.0734893	12	12	0.0780243
107.789	185	115	37	2.02073	0.043309	2.02073	0.043309	12	12	0.044902
108.191	180	120	42	1.73205	0.0832655	1.73205	0.0832655	12	12	0.0887338
108.594	178	122	44	1.61658	0.10597	1.61658	0.10597	12	12	0.113502
108.996	170	130	52	1.1547	0.248214	1.1547	0.248214	12	12	0.26567
109.398	159	141	63	0.519615	0.603332	0.519615	0.603332	12	12	0.629726
109.8	160	140	62	0.57735	0.563703	0.57735	0.563703	12	12	0.589876
110.202	155	145	67	0.288675	0.77283	0.288675	0.77283	12	12	0.798745
110.605	156	144	66	0.34641	0.729035	0.34641	0.729035	12	12	0.755285
111.007	156	144	66	0.34641	0.729035	0.34641	0.729035	12	12	0.755285
111.409	165	135	57	0.866025	0.386477	0.866025	0.386477	12	12	0.40951
111.811	162	138	60	0.69282	0.488423	0.69282	0.488423	12	12	0.513723
112.213	162	138	60	0.69282	0.488423	0.69282	0.488423	12	12	0.513723
112.616	170	130	52	1.1547	0.248214	1.1547	0.248214	12	12	0.26567
113.018	167	133	55	0.981495	0.326349	0.981495	0.326349	12	12	0.347358
113.42	171	129	51	1.21244	0.225347	1.21244	0.225347	12	12	0.241524
113.822	167	133	55	0.981495	0.326349	0.981495	0.326349	12	12	0.347358
114.224	167	133	55	0.981495	0.326349	0.981495	0.326349	12	12	0.347358
114.627	164	136	58	0.80829	0.418924	0.80829	0.418924	12	12	0.442833
115.029	155	145	67	0.288675	0.77283	0.288675	0.77283	12	12	0.798745
115.431	147	153	69	-0.173205	0.86249	-0.173205	0.86249	12	12	0.887386
115.833	144	156	66	-0.34641	0.729035	-0.34641	0.729035	12	12	0.755285
116.235	138	162	60	-0.69282	0.488423	-0.69282	0.488423	12	12	0.513723
116.638	128	172	50	-1.27017	0.204025	-1.27017	0.204025	12	12	0.218921
117.04	121	179	43	-1.67432	0.0940695	-1.67432	0.0940695	12	12	0.10053
117.442	118	182	40	-1.84752	0.0646726	-1.84752	0.0646726	12	12	0.0683614
117.844	112	188	34	-2.19393	0.0282411	-2.19393	0.0282411	12	12	0.0284207	1.95345e-05
118.246	111	189	33	-2.25167	0.0243441	-2.25167	0.0243441	12	12	0.0241843
118.649	112	188	34	-2.19393	0.0282411	-2.19393	0.0282411	12	12	0.0284207
119.051	118	182	40	-1.84752	0.0646726	-1.84752	0.0646726	12	12	0.0683614
119.453	118	182	40	-1.84752	0.0646726	-1.84752	0.0646726	12	12	0.0683614
119.855	126	174	48	-1.38564	0.165858	-1.38564	0.165858	12	12	0.178182
120.257	135	165	57	-0.866025	0.386477	-0.866025	0.386477	12	12	0.40951
